# Supplementary material for: Factors Expressed by Murine Embryonic Pancreatic Mesenchyme Enhance Generation of Insulin-Producing Cells From hESCs
Source: PubMed Central journal article supplement — Diabetes. 2013 Apr 16;62(5):1581–92. doi: 10.2337/db12-0167 (PMC3636645; doi:10.2337/db12-0167), 2013-04-16
Supplement: supp_db12-0167_DB120167SupplementaryData1.pdf [file supp_db12-0167_DB120167SupplementaryData1.pdf]

# BioConductor Gene Listing

## PM vs. PE

| rank | affyId   | accNum                             | geneId                 | geneName                       | geneSym                     | foldChng | tStat  | rawPV       | fdrPV       |
|------|----------|------------------------------------|------------------------|--------------------------------|-----------------------------|----------|--------|-------------|-------------|
| 1    | 10463476 | <a href="#">NM_178929</a>          | <a href="#">107250</a> | Kazal-type serine peptidase in | <a href="#">Kazald1</a>     | 11.611   | 10.303 | 1.42815e-05 | 0.00075605  |
| 2    | 10514185 |                                    |                        |                                |                             | 8.287    | 11.102 | 8.57404e-06 | 0.000556103 |
| 3    | 10502552 | <a href="#">NM_009899</a>          | <a href="#">12722</a>  | chloride channel calcium activ | <a href="#">Clca1</a>       | 7.847    | 8.187  | 6.66544e-05 | 0.00209723  |
| 4    | 10576049 | <a href="#">ENSMUST00000098351</a> | <a href="#">15227</a>  | forkhead box F1a               | <a href="#">Foxfla</a>      | 7.705    | 17.768 | 3.22203e-07 | 6.88149e-05 |
| 5    | 10485643 | <a href="#">AK165089</a>           | <a href="#">329480</a> | expressed sequence AI314831    | <a href="#">AI314831</a>    | 7.479    | 10.984 | 9.22679e-06 | 0.000580629 |
| 6    | 10480090 | <a href="#">NM_001001309</a>       | <a href="#">241226</a> | integrin alpha 8               | <a href="#">Itga8</a>       | 7.381    | 14.732 | 1.20442e-06 | 0.000156235 |
| 7    | 10519717 | <a href="#">NM_009152</a>          | <a href="#">20346</a>  | sema domain, immunoglobulin do | <a href="#">Sema3a</a>      | 6.575    | 14.611 | 1.27649e-06 | 0.000161613 |
| 8    | 10358581 | <a href="#">NM_001024720</a>       | <a href="#">545370</a> | hemicentin 1                   | <a href="#">Hmcn1</a>       | 6.533    | 10.45  | 1.29681e-05 | 0.000715918 |
| 9    | 10385770 | <a href="#">BC055827</a>           | <a href="#">257871</a> | olfactory receptor 1372, pseud | <a href="#">Olf1372-ps1</a> | 6.426    | 10.608 | 1.17051e-05 | 0.000668901 |
| 10   | 10591118 | <a href="#">NM_001080814</a>       | <a href="#">270120</a> | FAT tumor suppressor homolog 3 | <a href="#">Fat3</a>        | 6.327    | 7.053  | 0.000175445 | 0.00405422  |
| 11   | 10422244 | <a href="#">NM_175499</a>          | <a href="#">239250</a> | SLIT and NTRK-like family, mem | <a href="#">Slitrk6</a>     | 6.27     | 11.316 | 7.51985e-06 | 0.000510979 |
| 12   | 10474295 | <a href="#">NM_144783</a>          | <a href="#">22431</a>  | Wilms tumor homolog            | <a href="#">Wt1</a>         | 6.262    | 12.664 | 3.45893e-06 | 0.000296938 |
| 13   | 10368240 | <a href="#">NM_011545</a>          | <a href="#">21412</a>  | transcription factor 21        | <a href="#">Tcf21</a>       | 6.142    | 13.111 | 2.71823e-06 | 0.000250979 |
| 14   | 10358577 | <a href="#">NM_001024720</a>       | <a href="#">545370</a> | hemicentin 1                   | <a href="#">Hmcn1</a>       | 5.737    | 5.333  | 0.000983682 | 0.0129492   |
| 15   | 10591169 | <a href="#">ENSMUST00000034653</a> | <a href="#">73732</a>  | mucin 16                       | <a href="#">Muc16</a>       | 5.645    | 7.396  | 0.000129292 | 0.00328181  |
| 16   | 10354374 | <a href="#">NM_016917</a>          | <a href="#">53945</a>  | solute carrier family 40 (iron | <a href="#">Slc40a1</a>     | 5.383    | 13.299 | 2.46182e-06 | 0.000239929 |
| 17   | 10422728 | <a href="#">NM_023118</a>          | <a href="#">13132</a>  | disabled homolog 2 (Drosophila | <a href="#">Dab2</a>        | 5.377    | 29.612 | 8.47867e-09 | 1.28491e-05 |
| 18   | 10591123 | <a href="#">NM_001080814</a>       | <a href="#">270120</a> | FAT tumor suppressor homolog 3 | <a href="#">Fat3</a>        | 5.136    | 8.168  | 6.76662e-05 | 0.00211667  |
| 19   | 10493820 | <a href="#">NM_011313</a>          | <a href="#">20200</a>  | S100 calcium binding protein A | <a href="#">S100a6</a>      | 5.008    | 16.887 | 4.61353e-07 | 8.78816e-05 |
| 20   | 10344952 | <a href="#">NM_133832</a>          | <a href="#">98711</a>  | retinol dehydrogenase 10 (all- | <a href="#">Rdh10</a>       | 4.995    | 13.922 | 1.78918e-06 | 0.000195002 |
| 21   | 10440344 | <a href="#">NM_175549</a>          | <a href="#">268902</a> | roundabout homolog 2 (Drosophi | <a href="#">Robo2</a>       | 4.957    | 13.3   | 2.4602e-06  | 0.000239929 |
| 22   | 10601519 | <a href="#">NM_172781</a>          | <a href="#">237010</a> | kelch-like 4 (Drosophila)      | <a href="#">Klhl4</a>       | 4.915    | 9.987  | 1.76466e-05 | 0.000863701 |
| 23   | 10362968 | <a href="#">NM_024285</a>          | <a href="#">23828</a>  | blood vessel epicardial substa | <a href="#">Bves</a>        | 4.776    | 9.152  | 3.17788e-05 | 0.00128231  |
| 24   | 10358272 | <a href="#">NM_001042577</a>       | <a href="#">16876</a>  | LIM homeobox protein 9         | <a href="#">Lhx9</a>        | 4.716    | 18.127 | 2.79692e-07 | 6.49869e-05 |
| 25   | 10536499 | <a href="#">NM_007616</a>          | <a href="#">12389</a>  | caveolin, caveolae protein 1   | <a href="#">Cav1</a>        | 4.67     | 10.8   | 1.03535e-05 | 0.000623688 |
| 26   | 10439500 | <a href="#">NM_178924</a>          | <a href="#">22268</a>  | uropod protein 1B              | <a href="#">Upk1b</a>       | 4.649    | 10.439 | 1.30631e-05 | 0.00071742  |
| 27   | 10358535 | <a href="#">NM_001024720</a>       | <a href="#">545370</a> | hemicentin 1                   | <a href="#">Hmcn1</a>       | 4.623    | 4.66   | 0.00213813  | 0.0228537   |
| 28   | 10358668 | <a href="#">NM_001024720</a>       | <a href="#">545370</a> | hemicentin 1                   | <a href="#">Hmcn1</a>       | 4.607    | 7.348  | 0.000134849 | 0.00336488  |
| 29   | 10344897 | <a href="#">NM_172294</a>          | <a href="#">240725</a> | sulfatase 1                    | <a href="#">Sulf1</a>       | 4.57     | 7.96   | 8.01862e-05 | 0.00238126  |
| 30   | 10511363 | <a href="#">NM_001002927</a>       | <a href="#">18619</a>  | preproenkephalin 1             | <a href="#">Penk1</a>       | 4.51     | 6.989  | 0.000185989 | 0.00421753  |
| 31   | 10586865 | <a href="#">NM_009022</a>          | <a href="#">19378</a>  | aldehyde dehydrogenase family  | <a href="#">Aldh1a2</a>     | 4.497    | 8.615  | 4.75829e-05 | 0.00169376  |
| 32   | 10368495 | <a href="#">NM_028351</a>          | <a href="#">72780</a>  | R-spondin 3 homolog (Xenopus 1 | <a href="#">Rspo3</a>       | 4.474    | 12.112 | 4.70694e-06 | 0.000367274 |
| 33   | 10358670 | <a href="#">NM_001024720</a>       | <a href="#">545370</a> | hemicentin 1                   | <a href="#">Hmcn1</a>       | 4.463    | 8.209  | 6.54706e-05 | 0.00206613  |
| 34   | 10363224 | <a href="#">NM_021272</a>          | <a href="#">12140</a>  | fatty acid binding protein 7,  | <a href="#">Fabp7</a>       | 4.461    | 11.663 | 6.10797e-06 | 0.000437786 |
| 35   | 10547657 | <a href="#">NM_009779</a>          | <a href="#">12267</a>  | complement component 3a recept | <a href="#">C3ar1</a>       | 4.355    | 11.766 | 5.7518e-06  | 0.00041971  |
| 36   | 10498018 | <a href="#">NM_130448</a>          | <a href="#">73173</a>  | protocadherin 18               | <a href="#">Pcdh18</a>      | 4.33     | 20.529 | 1.15728e-07 | 4.04969e-05 |
| 37   | 10502565 | <a href="#">NM_030601</a>          | <a href="#">80797</a>  | chloride channel calcium activ | <a href="#">Clca2</a>       | 4.318    | 5.422  | 0.000891863 | 0.0120849   |
| 38   | 10514088 | <a href="#">NM_177863</a>          | <a href="#">329872</a> | Fras1 related extracellular ma | <a href="#">Frem1</a>       | 4.235    | 15.431 | 8.70113e-07 | 0.000129704 |
| 39   | 10476628 | <a href="#">NM_020595</a>          | <a href="#">57329</a>  | otoraplin                      | <a href="#">Otor</a>        | 4.23     | 6.038  | 0.000465284 | 0.00767799  |
| 40   | 10548892 | <a href="#">NM_007486</a>          | <a href="#">11857</a>  | Rho, GDP dissociation inhibito | <a href="#">Arhgdib</a>     | 4.229    | 6.987  | 0.000186445 | 0.00422076  |
| 41   | 10565204 | <a href="#">NM_007562</a>          | <a href="#">12173</a>  | basonuclin 1                   | <a href="#">Bnc1</a>        | 4.219    | 25.056 | 2.79921e-08 | 2.27641e-05 |
| 42   | 10499870 | <a href="#">NM_008508</a>          | <a href="#">16939</a>  | loricrin                       | <a href="#">Lor</a>         | 4.185    | 9.441  | 2.57852e-05 | 0.00111493  |
| 43   | 10592420 | <a href="#">NM_178737</a>          | <a href="#">244810</a> | expressed sequence AW551984    | <a href="#">AW551984</a>    | 4.108    | 11.976 | 5.08952e-06 | 0.000382321 |
| 44   | 10492355 | <a href="#">NM_008604</a>          | <a href="#">17380</a>  | membrane metallo endopeptidase | <a href="#">Mme</a>         | 4.073    | 5.056  | 0.00134319  | 0.0162056   |
| 45   | 10358575 | <a href="#">NM_001024720</a>       | <a href="#">545370</a> | hemicentin 1                   | <a href="#">Hmcn1</a>       | 4.065    | 5.654  | 0.000693981 | 0.01019     |
| 46   | 10591978 | <a href="#">NM_172290</a>          | <a href="#">235106</a> | neurotrimin                    | <a href="#">Hnt</a>         | 4.041    | 6.785  | 0.000224543 | 0.00476405  |

|    |          |                                    |                           |                                   |                                    |       |        |             |             |
|----|----------|------------------------------------|---------------------------|-----------------------------------|------------------------------------|-------|--------|-------------|-------------|
| 47 | 10490775 | <a href="#">ENSMUST00000099256</a> | <a href="#">100038710</a> | predicted gene,<br>ENSMUSG0000007 | <a href="#">ENSMUSG00000074728</a> | 4.036 | 6.99   | 0.000185856 | 0.00421753  |
| 48 | 10358664 | <a href="#">NM_001024720</a>       | <a href="#">545370</a>    | hemicentin 1                      | <a href="#">Hmcn1</a>              | 4.032 | 6.382  | 0.000330277 | 0.00606651  |
| 49 | 10410931 | <a href="#">NM_001081249</a>       | <a href="#">13003</a>     | versican                          | <a href="#">Vcan</a>               | 3.983 | 17.078 | 4.26138e-07 | 8.37046e-05 |
| 50 | 10359504 |                                    |                           |                                   |                                    | 3.954 | 11.296 | 7.61202e-06 | 0.000510979 |
| 51 | 10601942 | <a href="#">NM_013724</a>          | <a href="#">27206</a>     | Nik related kinase                | <a href="#">Nrk</a>                | 3.938 | 13.241 | 2.53778e-06 | 0.000243904 |
| 52 | 10595211 | <a href="#">NM_007730</a>          | <a href="#">12816</a>     | collagen, type XII, alpha 1       | <a href="#">Col12a1</a>            | 3.901 | 13.096 | 2.74019e-06 | 0.000251907 |
| 53 | 10358533 | <a href="#">NM_001024720</a>       | <a href="#">545370</a>    | hemicentin 1                      | <a href="#">Hmcn1</a>              | 3.879 | 4.373  | 0.00303972  | 0.0290298   |
| 54 | 10405587 | <a href="#">NM_009369</a>          | <a href="#">21810</a>     | transforming growth factor, be    | <a href="#">Tgfb1</a>              | 3.853 | 23.519 | 4.39788e-08 | 2.3519e-05  |
| 55 | 10358583 | <a href="#">NM_001024720</a>       | <a href="#">545370</a>    | hemicentin 1                      | <a href="#">Hmcn1</a>              | 3.837 | 13.706 | 1.99532e-06 | 0.000210945 |
| 56 | 10494445 | <a href="#">ENSMUST00000062058</a> | <a href="#">280411</a>    | Lix1-like                         | <a href="#">Lix1l</a>              | 3.791 | 15.646 | 7.89652e-07 | 0.000124642 |
| 57 | 10440340 |                                    |                           |                                   |                                    | 3.781 | 5.665  | 0.000686063 | 0.0101158   |
| 58 | 10484283 | <a href="#">NM_016744</a>          | <a href="#">18573</a>     | phosphodiesterase 1A, calmodul    | <a href="#">Pde1a</a>              | 3.772 | 14.221 | 1.54219e-06 | 0.000182167 |
| 59 | 10599348 | <a href="#">NM_016886</a>          | <a href="#">53623</a>     | glutamate receptor, ionotropic    | <a href="#">Gria3</a>              | 3.76  | 18.321 | 2.59412e-07 | 6.09446e-05 |
| 60 | 10423917 |                                    |                           |                                   |                                    | 3.755 | 19.15  | 1.89554e-07 | 5.27358e-05 |
| 61 | 10358561 | <a href="#">NM_001024720</a>       | <a href="#">545370</a>    | hemicentin 1                      | <a href="#">Hmcn1</a>              | 3.751 | 5.597  | 0.000737507 | 0.0106515   |
| 62 | 10410766 | <a href="#">NM_010151</a>          | <a href="#">13865</a>     | nuclear receptor subfamily 2,     | <a href="#">Nr2f1</a>              | 3.748 | 13.879 | 1.82847e-06 | 0.000197251 |
| 63 | 10469358 | <a href="#">NM_008625</a>          | <a href="#">17533</a>     | mannose receptor, C type 1        | <a href="#">Mrc1</a>               | 3.727 | 8.985  | 3.59408e-05 | 0.00138421  |
| 64 | 10385477 |                                    |                           |                                   |                                    | 3.675 | 5.299  | 0.00102113  | 0.0133358   |
| 65 | 10358434 | <a href="#">NM_008869</a>          | <a href="#">18783</a>     | phospholipase A2, group IVA (c    | <a href="#">Pla2g4a</a>            | 3.659 | 16.686 | 5.02044e-07 | 9.31159e-05 |
| 66 | 10438445 | <a href="#">NM_183390</a>          | <a href="#">239743</a>    | kelch-like 6 (Drosophila)         | <a href="#">Klhl6</a>              | 3.659 | 10.618 | 1.16276e-05 | 0.000668083 |
| 67 | 10358633 | <a href="#">NM_001024720</a>       | <a href="#">545370</a>    | hemicentin 1                      | <a href="#">Hmcn1</a>              | 3.645 | 8.266  | 6.25345e-05 | 0.00203008  |
| 68 | 10433431 |                                    |                           |                                   |                                    | 3.636 | 10.411 | 1.33013e-05 | 0.000725768 |
| 69 | 10358656 | <a href="#">NM_001024720</a>       | <a href="#">545370</a>    | hemicentin 1                      | <a href="#">Hmcn1</a>              | 3.622 | 6.592  | 0.000269644 | 0.00533798  |
| 70 | 10487040 | <a href="#">NM_007993</a>          | <a href="#">14118</a>     | fibrillin 1                       | <a href="#">Fbn1</a>               | 3.609 | 12.424 | 3.94848e-06 | 0.000323592 |
| 71 | 10514177 | <a href="#">NM_172870</a>          | <a href="#">242509</a>    | basonuclin 2                      | <a href="#">Bnc2</a>               | 3.607 | 17.97  | 2.97402e-07 | 6.61923e-05 |
| 72 | 10422760 | <a href="#">NM_011815</a>          | <a href="#">23880</a>     | FYN binding protein               | <a href="#">Fyb</a>                | 3.602 | 10.277 | 1.4523e-05  | 0.000761775 |
| 73 | 10466374 | <a href="#">NM_011600</a>          | <a href="#">21888</a>     | transducin-like enhancer of sp    | <a href="#">Tle4</a>               | 3.566 | 18.624 | 2.30948e-07 | 5.88333e-05 |
| 74 | 10415651 | <a href="#">NM_013518</a>          | <a href="#">14180</a>     | fibroblast growth factor 9        | <a href="#">Fgf9</a>               | 3.56  | 12.913 | 3.02027e-06 | 0.000268322 |
| 75 | 10358658 | <a href="#">NM_001024720</a>       | <a href="#">545370</a>    | hemicentin 1                      | <a href="#">Hmcn1</a>              | 3.557 | 3.65   | 0.00776434  | 0.0567966   |
| 76 | 10565193 | <a href="#">NM_013886</a>          | <a href="#">29877</a>     | hepatoma-derived growth factor    | <a href="#">Hdgfrp3</a>            | 3.557 | 23.732 | 4.12364e-08 | 2.29448e-05 |
| 77 | 10466800 | <a href="#">NM_175013</a>          | <a href="#">226041</a>    | phosphoglucomutase 5              | <a href="#">Pgm5</a>               | 3.541 | 15.398 | 8.83342e-07 | 0.000129704 |
| 78 | 10599581 | <a href="#">NM_133729</a>          | <a href="#">70415</a>     | RIKEN cDNA 2610018G03<br>gene     | <a href="#">2610018G03Rik</a>      | 3.522 | 7.447  | 0.000123756 | 0.00318334  |
| 79 | 10528207 | <a href="#">NM_007643</a>          | <a href="#">12491</a>     | CD36 antigen                      | <a href="#">Cd36</a>               | 3.497 | 5.024  | 0.00139405  | 0.0166332   |
| 80 | 10482448 | <a href="#">NM_015753</a>          | <a href="#">24136</a>     | zinc finger E-box binding home    | <a href="#">Zeb2</a>               | 3.416 | 8.373  | 5.74442e-05 | 0.00190078  |
| 81 | 10358660 | <a href="#">NM_001024720</a>       | <a href="#">545370</a>    | hemicentin 1                      | <a href="#">Hmcn1</a>              | 3.4   | 9.49   | 2.49002e-05 | 0.00108779  |
| 82 | 10358662 | <a href="#">NM_001024720</a>       | <a href="#">545370</a>    | hemicentin 1                      | <a href="#">Hmcn1</a>              | 3.383 | 6.607  | 0.000265775 | 0.00529601  |
| 83 | 10358650 | <a href="#">NM_001024720</a>       | <a href="#">545370</a>    | hemicentin 1                      | <a href="#">Hmcn1</a>              | 3.381 | 3.654  | 0.00771823  | 0.0566647   |
| 84 | 10549102 | <a href="#">NM_008428</a>          | <a href="#">16523</a>     | potassium inwardly-rectifying     | <a href="#">Kcnj8</a>              | 3.358 | 6.815  | 0.000218466 | 0.00469436  |
| 85 | 10484371 | <a href="#">NM_018782</a>          | <a href="#">54598</a>     | calcitonin receptor-like          | <a href="#">Calcr1</a>             | 3.346 | 10.903 | 9.70528e-06 | 0.000594807 |
| 86 | 10554129 | <a href="#">ENSMUST00000080024</a> | <a href="#">434198</a>    | RIKEN cDNA B130024G19<br>gene     | <a href="#">B130024G19Rik</a>      | 3.34  | 11.532 | 6.60506e-06 | 0.000464589 |
| 87 | 10358666 | <a href="#">NM_001024720</a>       | <a href="#">545370</a>    | hemicentin 1                      | <a href="#">Hmcn1</a>              | 3.322 | 6.702  | 0.000242855 | 0.00502386  |
| 88 | 10550388 | <a href="#">NM_010320</a>          | <a href="#">14709</a>     | guanine nucleotide binding pro    | <a href="#">Gng8</a>               | 3.321 | 8.175  | 6.7303e-05  | 0.00211136  |
| 89 | 10544768 | <a href="#">NM_010453</a>          | <a href="#">15402</a>     | homeo box A5                      | <a href="#">Hoxa5</a>              | 3.313 | 13.322 | 2.43248e-06 | 0.000239929 |
| 90 | 10358567 | <a href="#">NM_001024720</a>       | <a href="#">545370</a>    | hemicentin 1                      | <a href="#">Hmcn1</a>              | 3.306 | 4.381  | 0.00300758  | 0.0288009   |
| 91 | 10380629 | <a href="#">NM_010461</a>          | <a href="#">15416</a>     | homeo box B8                      | <a href="#">Hoxb8</a>              | 3.289 | 5.497  | 0.000821611 | 0.0114592   |
| 92 | 10498935 | <a href="#">NM_017469</a>          | <a href="#">54195</a>     | guanylate cyclase 1, soluble,     | <a href="#">Gucy1b3</a>            | 3.288 | 8.715  | 4.40571e-05 | 0.00159785  |
| 93 | 10573924 | <a href="#">NM_008610</a>          | <a href="#">17390</a>     | matrix metalloproteinase 2        | <a href="#">Mmp2</a>               | 3.261 | 20.3   | 1.25361e-07 | 4.07789e-05 |
| 94 | 10584561 | <a href="#">NM_133733</a>          | <a href="#">71566</a>     | RIKEN cDNA 9030425E11 gene        | <a href="#">9030425E11Rik</a>      | 3.261 | 11.484 | 6.79735e-06 | 0.000471224 |
| 95 | 10473312 | <a href="#">BC113787</a>           | <a href="#">241520</a>    | RIKEN cDNA D430039N05<br>gene     | <a href="#">D430039N05Rik</a>      | 3.239 | 6.698  | 0.000243643 | 0.00502386  |
| 96 | 10461622 | <a href="#">NM_027209</a>          | <a href="#">69774</a>     | membrane-spanning 4-domains,<br>s | <a href="#">Ms4a6b</a>             | 3.239 | 6.104  | 0.000435053 | 0.00734139  |
| 97 | 10358579 | <a href="#">NM_001024720</a>       | <a href="#">545370</a>    | hemicentin 1                      | <a href="#">Hmcn1</a>              | 3.234 | 5.705  | 0.000657478 | 0.00982453  |
| 98 | 10604175 | <a href="#">BC062956</a>           | <a href="#">245386</a>    | RIKEN cDNA 6430550H21<br>gene     | <a href="#">6430550H21Rik</a>      | 3.232 | 12.658 | 3.46878e-06 | 0.000296938 |

|     |          |                              |                        |                                |                               |       |        |             |             |
|-----|----------|------------------------------|------------------------|--------------------------------|-------------------------------|-------|--------|-------------|-------------|
| 99  | 10358569 | <a href="#">NM_001024720</a> | <a href="#">545370</a> | hemicentin 1                   | <a href="#">Hmcn1</a>         | 3.231 | 4.118  | 0.00419204  | 0.0360605   |
| 100 | 10473444 | <a href="#">NM_011784</a>    | <a href="#">23796</a>  | angiotensin receptor-like 1    | <a href="#">Agtr1</a>         | 3.226 | 12.812 | 3.19085e-06 | 0.000281114 |
| 101 | 10576911 | <a href="#">NM_010111</a>    | <a href="#">13642</a>  | ephrin B2                      | <a href="#">Efnb2</a>         | 3.221 | 7.423  | 0.000126283 | 0.0032287   |
| 102 | 10435948 | <a href="#">NM_026439</a>    | <a href="#">67896</a>  | coiled-coil domain containing  | <a href="#">Ccde80</a>        | 3.212 | 10.915 | 9.63008e-06 | 0.00059364  |
| 103 | 10358585 | <a href="#">NM_001024720</a> | <a href="#">545370</a> | hemicentin 1                   | <a href="#">Hmcn1</a>         | 3.21  | 9.556  | 2.3768e-05  | 0.00105048  |
| 104 | 10452419 | <a href="#">NM_207654</a>    | <a href="#">13640</a>  | ephrin A5                      | <a href="#">Efn5</a>          | 3.206 | 7.215  | 0.000151792 | 0.00364301  |
| 105 | 10365974 | <a href="#">NM_007833</a>    | <a href="#">13179</a>  | decorin                        | <a href="#">Dcn</a>           | 3.2   | 6.181  | 0.000402761 | 0.00696888  |
| 106 | 10458999 | <a href="#">NM_010181</a>    | <a href="#">14119</a>  | fibrillin 2                    | <a href="#">Fbn2</a>          | 3.199 | 13.859 | 1.84641e-06 | 0.000198175 |
| 107 | 10601412 | <a href="#">NM_175271</a>    | <a href="#">78134</a>  | lysophosphatidic acid receptor | <a href="#">Lpar4</a>         | 3.192 | 14.765 | 1.18587e-06 | 0.00015574  |
| 108 | 10358652 | <a href="#">NM_001024720</a> | <a href="#">545370</a> | hemicentin 1                   | <a href="#">Hmcn1</a>         | 3.191 | 3.765  | 0.00665764  | 0.0506729   |
| 109 | 10358654 | <a href="#">NM_001024720</a> | <a href="#">545370</a> | hemicentin 1                   | <a href="#">Hmcn1</a>         | 3.174 | 3.647  | 0.00779973  | 0.0570057   |
| 110 | 10493108 | <a href="#">NM_007759</a>    | <a href="#">12904</a>  | cellular retinoic acid binding | <a href="#">Crabp2</a>        | 3.171 | 15.645 | 7.90117e-07 | 0.000124642 |
| 111 | 10358565 | <a href="#">NM_001024720</a> | <a href="#">545370</a> | hemicentin 1                   | <a href="#">Hmcn1</a>         | 3.152 | 3.286  | 0.0128175   | 0.0806105   |
| 112 | 10461856 | <a href="#">NM_008137</a>    | <a href="#">14675</a>  | guanine nucleotide binding pro | <a href="#">Gna14</a>         | 3.148 | 5.51   | 0.000810187 | 0.0113281   |
| 113 | 10358623 | <a href="#">NM_001024720</a> | <a href="#">545370</a> | hemicentin 1                   | <a href="#">Hmcn1</a>         | 3.144 | 8.025  | 7.59999e-05 | 0.00229892  |
| 114 | 10521759 | <a href="#">NM_178804</a>    | <a href="#">20563</a>  | slit homolog 2 (Drosophila)    | <a href="#">Slit2</a>         | 3.135 | 9.13   | 3.22895e-05 | 0.00129318  |
| 115 | 10498653 | <a href="#">NM_133675</a>    | <a href="#">66183</a>  | RIKEN cDNA 1110032A04 gene     | <a href="#">1110032A04Rik</a> | 3.123 | 10.566 | 1.20292e-05 | 0.00068007  |
| 116 | 10505954 | <a href="#">NM_013690</a>    | <a href="#">21687</a>  | endothelial-specific receptor  | <a href="#">Tek</a>           | 3.114 | 7.714  | 9.83957e-05 | 0.00274832  |
| 117 | 10403584 | <a href="#">NM_010917</a>    | <a href="#">18073</a>  | nidogen 1                      | <a href="#">Nid1</a>          | 3.11  | 14.059 | 1.67047e-06 | 0.000188879 |
| 118 | 10365559 | <a href="#">NM_010512</a>    | <a href="#">16000</a>  | insulin-like growth factor 1   | <a href="#">Igf1</a>          | 3.102 | 6.74   | 0.000234321 | 0.00490372  |
| 119 | 10380641 | <a href="#">NM_008268</a>    | <a href="#">15413</a>  | homeo box B5                   | <a href="#">Hoxb5</a>         | 3.101 | 8.239  | 6.39212e-05 | 0.00205715  |
| 120 | 10581013 | <a href="#">NM_009866</a>    | <a href="#">12552</a>  | cadherin 11                    | <a href="#">Cdh11</a>         | 3.089 | 20.36  | 1.22747e-07 | 4.05525e-05 |
| 121 | 10571815 | <a href="#">NM_153581</a>    | <a href="#">234267</a> | glycoprotein m6a               | <a href="#">Gpm6a</a>         | 3.089 | 6.806  | 0.000220268 | 0.00469964  |
| 122 | 10591135 | <a href="#">NM_001080814</a> | <a href="#">270120</a> | FAT tumor suppressor homolog 3 | <a href="#">Fat3</a>          | 3.088 | 4.863  | 0.00167989  | 0.0188834   |
| 123 | 10413416 | <a href="#">NM_134437</a>    | <a href="#">171463</a> | interleukin 17 receptor D      | <a href="#">Il17rd</a>        | 3.054 | 14.536 | 1.32318e-06 | 0.000163727 |
| 124 | 10529875 | <a href="#">NM_001077398</a> | <a href="#">16826</a>  | LIM domain binding 2           | <a href="#">Ldb2</a>          | 3.054 | 17.081 | 4.25604e-07 | 8.37046e-05 |
| 125 | 10500808 | <a href="#">NM_133859</a>    | <a href="#">99543</a>  | olfactomedin-like 3            | <a href="#">Olfml3</a>        | 3.051 | 10.55  | 1.21521e-05 | 0.00068336  |
| 126 | 10380648 | <a href="#">NM_010459</a>    | <a href="#">15412</a>  | homeo box B4                   | <a href="#">Hoxb4</a>         | 3.049 | 14.447 | 1.38084e-06 | 0.000168766 |
| 127 | 10431697 | <a href="#">NM_011994</a>    | <a href="#">26874</a>  | ATP-binding cassette, sub-fami | <a href="#">Abcd2</a>         | 3.039 | 12.441 | 3.91021e-06 | 0.000322959 |
| 128 | 10358637 | <a href="#">NM_001024720</a> | <a href="#">545370</a> | hemicentin 1                   | <a href="#">Hmcn1</a>         | 3.025 | 5.666  | 0.000685183 | 0.0101099   |
| 129 | 10358619 | <a href="#">NM_001024720</a> | <a href="#">545370</a> | hemicentin 1                   | <a href="#">Hmcn1</a>         | 3.017 | 4.635  | 0.00220471  | 0.0233315   |
| 130 | 10394593 | <a href="#">BC052465</a>     | <a href="#">76820</a>  | DNA segment, Chr 12, ERATO Doi | <a href="#">D12Ertd553e</a>   | 3.017 | 8.363  | 5.79172e-05 | 0.00191344  |
| 131 | 10453747 | <a href="#">NM_130449</a>    | <a href="#">140792</a> | collectin sub-family member 12 | <a href="#">Colec12</a>       | 3.016 | 10.877 | 9.86515e-06 | 0.00060112  |
| 132 | 10522749 | <a href="#">NM_198702</a>    | <a href="#">319387</a> | latrophilin 3                  | <a href="#">Lphn3</a>         | 3.014 | 6.91   | 0.000200054 | 0.0044062   |
| 133 | 10513739 | <a href="#">NM_011607</a>    | <a href="#">21923</a>  | tenascin C                     | <a href="#">Tnc</a>           | 3.009 | 5.765  | 0.000617256 | 0.00940292  |
| 134 | 10503448 | <a href="#">NM_019724</a>    | <a href="#">17389</a>  | matrix metalloproteinase 16    | <a href="#">Mmp16</a>         | 2.995 | 14.835 | 1.1474e-06  | 0.000154526 |
| 135 | 10358527 | <a href="#">NM_001024720</a> | <a href="#">545370</a> | hemicentin 1                   | <a href="#">Hmcn1</a>         | 2.989 | 3.174  | 0.0150075   | 0.0904014   |
| 136 | 10498952 | <a href="#">NM_021896</a>    | <a href="#">60590</a>  | guanylate cyclase 1, soluble,  | <a href="#">Gucy1a3</a>       | 2.987 | 13.053 | 2.80312e-06 | 0.000254374 |
| 137 | 10435765 |                              |                        |                                |                               | 2.984 | 5.434  | 0.000880626 | 0.0119742   |
| 138 | 10358615 | <a href="#">NM_001024720</a> | <a href="#">545370</a> | hemicentin 1                   | <a href="#">Hmcn1</a>         | 2.977 | 5.681  | 0.000674847 | 0.00997927  |
| 139 | 10506050 | <a href="#">NM_001122952</a> | <a href="#">18027</a>  | nuclear factor I/A             | <a href="#">Nfia</a>          | 2.973 | 7.722  | 9.77537e-05 | 0.00274125  |
| 140 | 10607403 | <a href="#">NM_175429</a>    | <a href="#">207474</a> | potassium channel tetramerisat | <a href="#">Kctd12b</a>       | 2.965 | 7.103  | 0.000167709 | 0.00393132  |
| 141 | 10606016 | <a href="#">NM_013563</a>    | <a href="#">16186</a>  | interleukin 2 receptor, gamma  | <a href="#">Il2rg</a>         | 2.964 | 6.366  | 0.000335229 | 0.00611645  |
| 142 | 10358617 | <a href="#">NM_001024720</a> | <a href="#">545370</a> | hemicentin 1                   | <a href="#">Hmcn1</a>         | 2.944 | 11.236 | 7.8959e-06  | 0.000524982 |
| 143 | 10435767 |                              |                        |                                |                               | 2.937 | 2.758  | 0.0273788   | 0.135099    |
| 144 | 10380637 | <a href="#">NM_008269</a>    | <a href="#">15414</a>  | homeo box B6                   | <a href="#">Hoxb6</a>         | 2.932 | 7.596  | 0.000108818 | 0.00295358  |
| 145 | 10358587 | <a href="#">NM_001024720</a> | <a href="#">545370</a> | hemicentin 1                   | <a href="#">Hmcn1</a>         | 2.927 | 6.743  | 0.000233519 | 0.00489349  |
| 146 | 10596812 | <a href="#">BC115538</a>     | <a href="#">68176</a>  | RIKEN cDNA 6230427J02 gene     | <a href="#">6230427J02Rik</a> | 2.923 | 13.561 | 2.14887e-06 | 0.000221637 |
| 147 | 10427297 | <a href="#">NM_175730</a>    | <a href="#">15424</a>  | homeo box C5                   | <a href="#">Hoxc5</a>         | 2.918 | 5.7    | 0.000660858 | 0.00984721  |
| 148 | 10356880 | <a href="#">NM_009183</a>    | <a href="#">20452</a>  | ST8 alpha-N-acetyl-neuraminide | <a href="#">St8sia4</a>       | 2.917 | 7.099  | 0.000168392 | 0.00394294  |
| 149 | 10358531 | <a href="#">NM_001024720</a> | <a href="#">545370</a> | hemicentin 1                   | <a href="#">Hmcn1</a>         | 2.913 | 5.031  | 0.00138225  | 0.0165588   |
| 150 | 10503835 | <a href="#">NM_027491</a>    | <a href="#">52187</a>  | Ras-related GTP binding D      | <a href="#">Rragd</a>         | 2.91  | 7.403  | 0.000128586 | 0.00327174  |
| 151 | 10522503 | <a href="#">NM_011058</a>    | <a href="#">18595</a>  | platelet derived growth factor | <a href="#">Pdgfra</a>        | 2.9   | 13.071 | 2.77604e-06 | 0.000253344 |
| 152 | 10497451 | <a href="#">NM_007753</a>    | <a href="#">12873</a>  | carboxypeptidase A3, mast cell | <a href="#">Cpa3</a>          | 2.899 | 4.387  | 0.00298597  | 0.0286589   |

|     |          |                                    |                        |                                   |                                    |       |        |             |             |
|-----|----------|------------------------------------|------------------------|-----------------------------------|------------------------------------|-------|--------|-------------|-------------|
| 153 | 10372177 | <a href="#">NM_177368</a>          | <a href="#">278279</a> | transmembrane and tetratrico      | <a href="#">Tmtc2</a>              | 2.892 | 10.275 | 1.45445e-05 | 0.000761775 |
| 154 | 10513957 | <a href="#">NM_011211</a>          | <a href="#">19266</a>  | protein tyrosine phosphatase,     | <a href="#">Ptprd</a>              | 2.883 | 10.3   | 1.43029e-05 | 0.00075605  |
| 155 | 10542355 | <a href="#">NM_010128</a>          | <a href="#">13730</a>  | epithelial membrane protein 1     | <a href="#">Emp1</a>               | 2.872 | 8.102  | 7.1374e-05  | 0.00220573  |
| 156 | 10564527 | <a href="#">NM_009697</a>          | <a href="#">11819</a>  | nuclear receptor subfamily 2,     | <a href="#">Nr2f2</a>              | 2.867 | 11.74  | 5.84039e-06 | 0.000424361 |
| 157 | 10358529 | <a href="#">NM_001024720</a>       | <a href="#">545370</a> | hemicentin 1                      | <a href="#">Hmcn1</a>              | 2.836 | 3.512  | 0.00937401  | 0.0648149   |
| 158 | 10358515 | <a href="#">NM_001024720</a>       | <a href="#">545370</a> | hemicentin 1                      | <a href="#">Hmcn1</a>              | 2.833 | 3.297  | 0.0126198   | 0.0796516   |
| 159 | 10397645 | <a href="#">NM_008152</a>          | <a href="#">14744</a>  | G-protein coupled receptor 65     | <a href="#">Gpr65</a>              | 2.825 | 8.417  | 5.55234e-05 | 0.00186897  |
| 160 | 10358553 | <a href="#">NM_001024720</a>       | <a href="#">545370</a> | hemicentin 1                      | <a href="#">Hmcn1</a>              | 2.822 | 5.788  | 0.000602346 | 0.00923256  |
| 161 | 10353192 | <a href="#">NM_010164</a>          | <a href="#">14048</a>  | eyes absent 1 homolog (Drosoph    | <a href="#">Eya1</a>               | 2.812 | 6.941  | 0.000194467 | 0.00432822  |
| 162 | 10538802 | <a href="#">BC047154</a>           | <a href="#">68169</a>  | RIKEN cDNA A930038C07<br>gene     | <a href="#">A930038C07Rik</a>      | 2.804 | 11.764 | 5.75652e-06 | 0.00041971  |
| 163 | 10358559 | <a href="#">NM_001024720</a>       | <a href="#">545370</a> | hemicentin 1                      | <a href="#">Hmcn1</a>              | 2.804 | 4.414  | 0.00288818  | 0.0281158   |
| 164 | 10542575 | <a href="#">NM_018779</a>          | <a href="#">54611</a>  | phosphodiesterase 3A, cGMP<br>inh | <a href="#">Pde3a</a>              | 2.803 | 8.499  | 5.20459e-05 | 0.0017952   |
| 165 | 10358648 | <a href="#">NM_001024720</a>       | <a href="#">545370</a> | hemicentin 1                      | <a href="#">Hmcn1</a>              | 2.797 | 3.556  | 0.0088223   | 0.0620968   |
| 166 | 10530692 | <a href="#">NM_010612</a>          | <a href="#">16542</a>  | kinase insert domain protein r    | <a href="#">Kdr</a>                | 2.797 | 7.043  | 0.000177044 | 0.00407992  |
| 167 | 10574438 | <a href="#">NM_009868</a>          | <a href="#">12562</a>  | cadherin 5                        | <a href="#">Cdh5</a>               | 2.793 | 9.815  | 1.98396e-05 | 0.000940559 |
| 168 | 10495186 | <a href="#">BC127040</a>           | <a href="#">229694</a> | expressed sequence AI504432       | <a href="#">AI504432</a>           | 2.792 | 9.423  | 2.61317e-05 | 0.0011234   |
| 169 | 10584600 |                                    |                        |                                   |                                    | 2.786 | 12.071 | 4.8193e-06  | 0.0003692   |
| 170 | 10358525 | <a href="#">NM_001024720</a>       | <a href="#">545370</a> | hemicentin 1                      | <a href="#">Hmcn1</a>              | 2.779 | 3.415  | 0.0107152   | 0.0712233   |
| 171 | 10510429 | <a href="#">NM_011303</a>          | <a href="#">20148</a>  | dehydrogenase/reductase (SDR f    | <a href="#">Dhrs3</a>              | 2.778 | 8.742  | 4.31652e-05 | 0.00157631  |
| 172 | 10521796 | <a href="#">NM_001039042</a>       | <a href="#">626834</a> | kallikrein related-peptidase 1    | <a href="#">Klik13</a>             | 2.778 | 3.936  | 6.00536766  | 0.0430887   |
| 173 | 10552469 | <a href="#">NM_001039042</a>       | <a href="#">626834</a> | kallikrein related-peptidase 1    | <a href="#">Klik13</a>             | 2.776 | 15.947 | 6.90551e-07 | 0.000113186 |
| 174 | 10435745 | <a href="#">AY512926</a>           | <a href="#">791390</a> | predicted gene,<br>ENSMUSG0000006 | <a href="#">ENSMUSG00000068293</a> | 2.776 | 4.689  | 0.00206493  | 0.0222419   |
| 175 | 10490777 | <a href="#">NM_030708</a>          | <a href="#">80892</a>  | zinc finger homeodomain 4         | <a href="#">Zfhx4</a>              | 2.776 | 11.001 | 9.1286e-06  | 0.000580043 |
| 176 | 10607484 | <a href="#">NM_001093750</a>       | <a href="#">211612</a> | patched domain containing 1       | <a href="#">Ptchd1</a>             | 2.773 | 4.225  | 0.00365844  | 0.0328606   |
| 177 | 10556076 | <a href="#">NM_172907</a>          | <a href="#">244198</a> | olfactomedin-like 1               | <a href="#">Olfml1</a>             | 2.773 | 12.396 | 4.0108e-06  | 0.00032617  |
| 178 | 10497689 | <a href="#">NM_013531</a>          | <a href="#">14696</a>  | guanine nucleotide binding pro    | <a href="#">Gnb4</a>               | 2.772 | 12.922 | 3.0069e-06  | 0.000268322 |
| 179 | 10345777 | <a href="#">NM_133193</a>          | <a href="#">107527</a> | interleukin 1 receptor-like 2     | <a href="#">Il1r2</a>              | 2.758 | 4.135  | 0.00410171  | 0.0355728   |
| 180 | 10358573 | <a href="#">NM_001024720</a>       | <a href="#">545370</a> | hemicentin 1                      | <a href="#">Hmcn1</a>              | 2.758 | 2.717  | 0.0290334   | 0.140156    |
| 181 | 10606333 | <a href="#">DQ192038</a>           | <a href="#">333564</a> | gene model 784, (NCBI)            | <a href="#">Gm784</a>              | 2.753 | 8.401  | 5.62148e-05 | 0.00187182  |
| 182 | 10484307 | <a href="#">NM_011356</a>          | <a href="#">20378</a>  | frizzled-related protein          | <a href="#">Frzb</a>               | 2.749 | 5.296  | 0.0010247   | 0.0133742   |
| 183 | 10566268 | <a href="#">NM_008219</a>          | <a href="#">15132</a>  | hemoglobin Z, beta-like embryo    | <a href="#">Hbb-bh1</a>            | 2.739 | 4.646  | 0.00217597  | 0.0231432   |
| 184 | 10358611 | <a href="#">NM_001024720</a>       | <a href="#">545370</a> | hemicentin 1                      | <a href="#">Hmcn1</a>              | 2.738 | 7.453  | 0.000123083 | 0.00317762  |
| 185 | 10521972 | <a href="#">NM_018764</a>          | <a href="#">54216</a>  | protocadherin 7                   | <a href="#">Pcdh7</a>              | 2.733 | 7.846  | 8.80681e-05 | 0.00257553  |
| 186 | 10601980 | <a href="#">NM_175541</a>          | <a href="#">245631</a> | melanoma associated antigen (m    | <a href="#">Mum11l</a>             | 2.726 | 14.395 | 1.41639e-06 | 0.000172115 |
| 187 | 10585438 | <a href="#">NM_013496</a>          | <a href="#">12903</a>  | cellular retinoic acid binding    | <a href="#">Crabp1</a>             | 2.709 | 6.473  | 0.000302239 | 0.00575488  |
| 188 | 10438753 | <a href="#">NM_173379</a>          | <a href="#">210530</a> | leprecan-like 1                   | <a href="#">Leprel1</a>            | 2.699 | 10.44  | 1.30497e-05 | 0.00071742  |
| 189 | 10358571 | <a href="#">NM_001024720</a>       | <a href="#">545370</a> | hemicentin 1                      | <a href="#">Hmcn1</a>              | 2.694 | 3.796  | 0.00638423  | 0.0490382   |
| 190 | 10502050 | <a href="#">ENSMUST00000029662</a> | <a href="#">71481</a>  | alpha-kinase 1                    | <a href="#">Alpk1</a>              | 2.689 | 3.863  | 0.00584213  | 0.0461779   |
| 191 | 10523451 | <a href="#">NM_013470</a>          | <a href="#">11745</a>  | annexin A3                        | <a href="#">Anxa3</a>              | 2.685 | 16.504 | 5.42268e-07 | 9.74342e-05 |
| 192 | 10563441 | <a href="#">NM_010129</a>          | <a href="#">13732</a>  | epithelial membrane protein 3     | <a href="#">Emp3</a>               | 2.666 | 12.632 | 3.5198e-06  | 0.000297691 |
| 193 | 10374366 | <a href="#">NM_207655</a>          | <a href="#">13649</a>  | epidermal growth factor recept    | <a href="#">Egfr</a>               | 2.663 | 5.698  | 0.000662356 | 0.0098615   |
| 194 | 10403727 | <a href="#">NM_008130</a>          | <a href="#">14634</a>  | GLI-Kruppel family member<br>GLI3 | <a href="#">Gli3</a>               | 2.659 | 8.901  | 3.82774e-05 | 0.001435    |
| 195 | 10543791 | <a href="#">NM_013723</a>          | <a href="#">27205</a>  | podocalyxin-like                  | <a href="#">Podxl</a>              | 2.651 | 10.253 | 1.4764e-05  | 0.000767004 |
| 196 | 10526441 | <a href="#">NM_175309</a>          | <a href="#">100647</a> | uropod 3B                         | <a href="#">Upk3b</a>              | 2.631 | 8.341  | 5.89316e-05 | 0.00194089  |
| 197 | 10601993 | <a href="#">BC113128</a>           | <a href="#">102871</a> | RIKEN cDNA D330045A20<br>gene     | <a href="#">D330045A20Rik</a>      | 2.63  | 13.31  | 2.44783e-06 | 0.000239929 |
| 198 | 10549162 | <a href="#">NM_011374</a>          | <a href="#">20449</a>  | ST8 alpha-N-acetyl-neuraminide    | <a href="#">St8sia1</a>            | 2.62  | 10.511 | 1.24634e-05 | 0.000695317 |
| 199 | 10358549 | <a href="#">NM_001024720</a>       | <a href="#">545370</a> | hemicentin 1                      | <a href="#">Hmcn1</a>              | 2.618 | 5.733  | 0.000638126 | 0.00962378  |
| 200 | 10475544 | <a href="#">NM_172537</a>          | <a href="#">214968</a> | sema domain, transmembrane<br>dom | <a href="#">Sema6d</a>             | 2.61  | 8.457  | 5.38086e-05 | 0.00184099  |
| 201 | 10545974 | <a href="#">NM_054041</a>          | <a href="#">69538</a>  | anthrax toxin receptor 1          | <a href="#">Antxr1</a>             | 2.603 | 9.156  | 3.16914e-05 | 0.00128123  |
| 202 | 10401673 | <a href="#">NM_009368</a>          | <a href="#">21809</a>  | transforming growth factor, be    | <a href="#">Tgfb3</a>              | 2.593 | 11.923 | 5.24807e-06 | 0.000390723 |
| 203 | 10567297 | <a href="#">NM_001033380</a>       | <a href="#">319622</a> | RIKEN cDNA E030018N11<br>gene     | <a href="#">E030018N11Rik</a>      | 2.587 | 7.572  | 0.0001111   | 0.00299999  |

|     |          |                                    |                           |                                   |                                    |       |        |             |             |
|-----|----------|------------------------------------|---------------------------|-----------------------------------|------------------------------------|-------|--------|-------------|-------------|
| 204 | 1041643/ | <a href="#">NM_008879</a>          | <a href="#">18820</a>     | lymphocyte cytosolic protein 1    | <a href="#">Lcp1</a>               | 2.583 | 10.131 | 1.07178e-05 | 0.000636968 |
| 205 | 10358517 | <a href="#">NM_001024720</a>       | <a href="#">545370</a>    | hemicentin 1                      | <a href="#">Hmcn1</a>              | 2.58  | 4.223  | 0.00366883  | 0.0328981   |
| 206 | 10542592 | <a href="#">AK143453</a>           | <a href="#">100093700</a> | predicted gene,<br>ENSMUSG0000007 | <a href="#">ENSMUSG00000072690</a> | 2.577 | 8.305  | 6.06441e-05 | 0.00199108  |
| 207 | 10531724 | <a href="#">NM_139198</a>          | <a href="#">231507</a>    | placenta-specific 8               | <a href="#">Plac8</a>              | 2.574 | 9.72   | 2.11939e-05 | 0.000984889 |
| 208 | 10375261 | <a href="#">NM_008070</a>          | <a href="#">14401</a>     | gamma-aminobutyric acid<br>(GABA- | <a href="#">Gabrb2</a>             | 2.572 | 6.664  | 0.000251597 | 0.00512009  |
| 209 | 10358521 | <a href="#">NM_001024720</a>       | <a href="#">545370</a>    | hemicentin 1                      | <a href="#">Hmcn1</a>              | 2.571 | 4.544  | 0.00246254  | 0.0252023   |
| 210 | 10358613 | <a href="#">NM_001024720</a>       | <a href="#">545370</a>    | hemicentin 1                      | <a href="#">Hmcn1</a>              | 2.548 | 4.854  | 0.00169816  | 0.0190584   |
| 211 | 10356020 | <a href="#">ENSMUST00000077946</a> | <a href="#">210293</a>    | dedicator of cytokinesis 10       | <a href="#">Dock10</a>             | 2.548 | 10.132 | 1.59947e-05 | 0.000816888 |
| 212 | 10445071 | <a href="#">NM_001013745</a>       | <a href="#">22715</a>     | zinc finger protein 57            | <a href="#">Zfp57</a>              | 2.544 | 15.568 | 8.17825e-07 | 0.000125305 |
| 213 | 10368556 | <a href="#">NM_013904</a>          | <a href="#">15214</a>     | hairy/enhancer-of-split relate    | <a href="#">Hey2</a>               | 2.541 | 5.977  | 0.000495397 | 0.00805744  |
| 214 | 10538640 | <a href="#">NM_011920</a>          | <a href="#">26357</a>     | ATP-binding cassette, sub-fami    | <a href="#">Abcg2</a>              | 2.54  | 12.248 | 4.35868e-06 | 0.000348901 |
| 215 | 10488382 | <a href="#">NM_010740</a>          | <a href="#">17064</a>     | CD93 antigen                      | <a href="#">Cd93</a>               | 2.532 | 8.252  | 6.32582e-05 | 0.00204829  |
| 216 | 10538126 | <a href="#">NM_174990</a>          | <a href="#">107526</a>    | GTPase, IMAP family member 4      | <a href="#">Gimap4</a>             | 2.531 | 9.595  | 2.31235e-05 | 0.00102993  |
| 217 | 10404606 | <a href="#">NM_010745</a>          | <a href="#">17084</a>     | lymphocyte antigen 86             | <a href="#">Ly86</a>               | 2.527 | 6.272  | 0.000367932 | 0.00651009  |
| 218 | 10407841 | <a href="#">NM_001081348</a>       | <a href="#">94253</a>     | HECT, C2 and WW domain<br>contain | <a href="#">Hecw1</a>              | 2.525 | 9.702  | 2.14602e-05 | 0.000992896 |
| 219 | 10591120 | <a href="#">NM_001080814</a>       | <a href="#">270120</a>    | FAT tumor suppressor homolog<br>3 | <a href="#">Fat3</a>               | 2.524 | 4.438  | 0.00280104  | 0.0275466   |
| 220 | 10435271 | <a href="#">NM_175256</a>          | <a href="#">77446</a>     | HEG homolog 1 (zebrafish)         | <a href="#">Heg1</a>               | 2.521 | 9.065  | 3.38878e-05 | 0.0013393   |
| 221 | 10471945 | <a href="#">ENSMUST00000064026</a> | <a href="#">433424</a>    | predicted gene,<br>OTTMUSG0000001 | <a href="#">OTTMUSG00000012358</a> | 2.521 | 5.35   | 0.000965002 | 0.0128005   |
| 222 | 10433776 | <a href="#">NM_011415</a>          | <a href="#">20583</a>     | snail homolog 2 (Drosophila)      | <a href="#">Snai2</a>              | 2.521 | 12.416 | 3.96699e-06 | 0.000323854 |
| 223 | 10506031 | <a href="#">NM_010905</a>          | <a href="#">18027</a>     | nuclear factor I/A                | <a href="#">Nfia</a>               | 2.519 | 13.52  | 2.19483e-06 | 0.00022508  |
| 224 | 10440091 | <a href="#">NM_007739</a>          | <a href="#">12837</a>     | collagen, type VIII, alpha 1      | <a href="#">Col8a1</a>             | 2.514 | 9.699  | 2.15107e-05 | 0.000993061 |
| 225 | 10568668 | <a href="#">NM_007400</a>          | <a href="#">11489</a>     | a disintegrin and metallopepti    | <a href="#">Adam12</a>             | 2.51  | 8.598  | 4.82182e-05 | 0.00170608  |
| 226 | 10453678 | <a href="#">NM_011546</a>          | <a href="#">21417</a>     | zinc finger E-box binding home    | <a href="#">Zeb1</a>               | 2.51  | 14.774 | 1.18058e-06 | 0.00015574  |
| 227 | 10579958 | <a href="#">NM_008357</a>          | <a href="#">16168</a>     | interleukin 15                    | <a href="#">Il15</a>               | 2.509 | 5.931  | 0.000519504 | 0.00829872  |
| 228 | 10476321 | <a href="#">NM_023043</a>          | <a href="#">26434</a>     | prion protein dublet              | <a href="#">Prnd</a>               | 2.502 | 7.306  | 0.000139912 | 0.00344063  |
| 229 | 10358519 | <a href="#">NM_001024720</a>       | <a href="#">545370</a>    | hemicentin 1                      | <a href="#">Hmcn1</a>              | 2.495 | 3.196  | 0.0145523   | 0.0884179   |
| 230 | 10536216 | <a href="#">NM_025331</a>          | <a href="#">66066</a>     | guanine nucleotide binding pro    | <a href="#">Gng11</a>              | 2.492 | 14.598 | 1.2841e-06  | 0.000161613 |
| 231 | 10591127 | <a href="#">NM_001080814</a>       | <a href="#">270120</a>    | FAT tumor suppressor homolog<br>3 | <a href="#">Fat3</a>               | 2.492 | 3.669  | 0.00756551  | 0.0558733   |
| 232 | 10519857 | <a href="#">NM_010427</a>          | <a href="#">15234</a>     | hepatocyte growth factor          | <a href="#">Hgf</a>                | 2.491 | 6.295  | 0.000359687 | 0.00641108  |
| 233 | 10358563 | <a href="#">NM_001024720</a>       | <a href="#">545370</a>    | hemicentin 1                      | <a href="#">Hmcn1</a>              | 2.489 | 3.42   | 0.0106335   | 0.070881    |
| 234 | 10549108 | <a href="#">NM_021041</a>          | <a href="#">20928</a>     | ATP-binding cassette, sub-fami    | <a href="#">Abcc9</a>              | 2.488 | 5.636  | 0.000707793 | 0.0103353   |
| 235 | 10584142 | <a href="#">NM_011808</a>          | <a href="#">23871</a>     | E26 avian leukemia oncogene 1,    | <a href="#">Ets1</a>               | 2.488 | 9.146  | 3.19105e-05 | 0.00128517  |
| 236 | 10484207 | <a href="#">ENSMUST00000049544</a> | <a href="#">545428</a>    | RIKEN cDNA 2610301F02 gene        | <a href="#">2610301F02Rik</a>      | 2.487 | 10.484 | 1.26843e-05 | 0.000705782 |
| 237 | 10523359 | <a href="#">NM_018866</a>          | <a href="#">55985</a>     | chemokine (C-X-C motif) ligand    | <a href="#">Cxcl13</a>             | 2.481 | 14.26  | 1.51266e-06 | 0.000179684 |
| 238 | 10367634 | <a href="#">NM_031185</a>          | <a href="#">83397</a>     | A kinase (PRKA) anchor protein    | <a href="#">Akap12</a>             | 2.479 | 9.601  | 2.30252e-05 | 0.00102927  |
| 239 | 10502890 | <a href="#">NM_011372</a>          | <a href="#">20447</a>     | ST6 (alpha-N-acetyl-neuraminyl    | <a href="#">St6galnac3</a>         | 2.479 | 10.536 | 1.22648e-05 | 0.000687871 |
| 240 | 10579812 | <a href="#">NM_010332</a>          | <a href="#">13617</a>     | endothelin receptor type A        | <a href="#">Ednra</a>              | 2.475 | 7.752  | 9.52953e-05 | 0.00271553  |
| 241 | 10463070 | <a href="#">NM_009848</a>          | <a href="#">12495</a>     | ectonucleoside triphosphate di    | <a href="#">Entpd1</a>             | 2.472 | 8.291  | 6.13239e-05 | 0.00200098  |
| 242 | 10570957 | <a href="#">NM_013834</a>          | <a href="#">20377</a>     | secreted frizzled-related prot    | <a href="#">Sfrp1</a>              | 2.47  | 10.603 | 1.17443e-05 | 0.000669332 |
| 243 | 10590031 | <a href="#">NM_133721</a>          | <a href="#">104099</a>    | integrin alpha 9                  | <a href="#">Itga9</a>              | 2.466 | 6.615  | 0.000263589 | 0.00527277  |
| 244 | 10559207 | <a href="#">NM_019391</a>          | <a href="#">16985</a>     | lymphocyte specific 1             | <a href="#">Lsp1</a>               | 2.465 | 5.944  | 0.000512375 | 0.00821976  |
| 245 | 10514049 | <a href="#">NM_001113209</a>       | <a href="#">18028</a>     | nuclear factor I/B                | <a href="#">Nfib</a>               | 2.453 | 10.773 | 1.05329e-05 | 0.000632693 |
| 246 | 10591131 | <a href="#">NM_001080814</a>       | <a href="#">270120</a>    | FAT tumor suppressor homolog<br>3 | <a href="#">Fat3</a>               | 2.45  | 3.996  | 0.00491048  | 0.0407485   |
| 247 | 10366052 | <a href="#">NM_013598</a>          | <a href="#">17311</a>     | kit ligand                        | <a href="#">Kitl</a>               | 2.448 | 8.467  | 5.33794e-05 | 0.00183223  |
| 248 | 10358557 | <a href="#">NM_001024720</a>       | <a href="#">545370</a>    | hemicentin 1                      | <a href="#">Hmcn1</a>              | 2.447 | 2.979  | 0.0198394   | 0.109298    |
| 249 | 10536444 | <a href="#">NM_053242</a>          | <a href="#">114142</a>    | forkhead box P2                   | <a href="#">Foxp2</a>              | 2.436 | 10.091 | 1.64442e-05 | 0.000829823 |
| 250 | 10425161 | <a href="#">NM_008495</a>          | <a href="#">16852</a>     | lectin, galactose binding, sol    | <a href="#">Lgals1</a>             | 2.43  | 9.23   | 3.00229e-05 | 0.00123263  |
| 251 | 10384223 | <a href="#">NM_008343</a>          | <a href="#">16009</a>     | insulin-like growth factor bin    | <a href="#">Igf3</a>               | 2.427 | 12.672 | 3.44226e-06 | 0.000296938 |
| 252 | 10531931 | <a href="#">NM_010097</a>          | <a href="#">13602</a>     | SPARC-like 1 (mast9, hevin)       | <a href="#">Sparr1</a>             | 2.418 | 4.69   | 0.00206283  | 0.0222307   |
| 253 | 10406434 | <a href="#">NM_025282</a>          | <a href="#">17260</a>     | myocyte enhancer factor 2C        | <a href="#">Mef2c</a>              | 2.412 | 18.553 | 2.37263e-07 | 5.97226e-05 |
| 254 | 10351867 | <a href="#">NM_001013779</a>       | <a href="#">383619</a>    | absent in melanoma 2              | <a href="#">Aim2</a>               | 2.412 | 5.985  | 0.000491163 | 0.00799473  |
| 255 | 10500559 | <a href="#">NM_013821</a>          | <a href="#">15497</a>     | hydroxy-delta-5-steroid dehydr    | <a href="#">Hsd3b6</a>             | 2.409 | 3.437  | 0.0103912   | 0.0698131   |

|     |          |                                    |                           |                                   |                                    |       |        |             |             |
|-----|----------|------------------------------------|---------------------------|-----------------------------------|------------------------------------|-------|--------|-------------|-------------|
| 256 | 10446763 | <a href="#">NM_029999</a>          | <a href="#">77889</a>     | limb-bud and heart                | <a href="#">Lbh</a>                | 2.404 | 11.305 | 7.57148e-06 | 0.000510979 |
| 257 | 10364593 | <a href="#">NM_007725</a>          | <a href="#">12798</a>     | calponin 2                        | <a href="#">Cnn2</a>               | 2.4   | 4.101  | 0.00428669  | 0.0366806   |
| 258 | 10483865 | <a href="#">NM_010222</a>          | <a href="#">14231</a>     | FK506 binding protein 7           | <a href="#">Fkbp7</a>              | 2.398 | 8.769  | 4.22733e-05 | 0.00154909  |
| 259 | 10578950 | <a href="#">ENSMUST00000098718</a> | <a href="#">100038489</a> | predicted gene,<br>ENSMUSG0000007 | <a href="#">ENSMUSG00000074303</a> | 2.394 | 5.027  | 0.00138903  | 0.0166024   |
| 260 | 10434291 | <a href="#">NM_054052</a>          | <a href="#">108105</a>    | UDP-GlcNAc:betaGal beta-1,3-N-    | <a href="#">B3gnt5</a>             | 2.392 | 9.535  | 2.41236e-05 | 0.00106264  |
| 261 | 10464425 | <a href="#">NM_018869</a>          | <a href="#">14773</a>     | G protein-coupled receptor kin    | <a href="#">Grk5</a>               | 2.392 | 6.327  | 0.000348485 | 0.00626742  |
| 262 | 10534906 | <a href="#">BC028660</a>           | <a href="#">100134986</a> | hypothetical LOC100134986         | <a href="#">LOC100134986</a>       | 2.389 | 9.13   | 3.22927e-05 | 0.00129318  |
| 263 | 10421100 | <a href="#">NM_008691</a>          | <a href="#">18040</a>     | neurofilament, medium polypept    | <a href="#">Nefm</a>               | 2.385 | 5.633  | 0.00070973  | 0.0103493   |
| 264 | 10506254 | <a href="#">NM_183024</a>          | <a href="#">242570</a>    | ribonucleoprotein, PTB-binding    | <a href="#">Raver2</a>             | 2.381 | 6.929  | 0.000196563 | 0.00435315  |
| 265 | 10362959 | <a href="#">NM_024286</a>          | <a href="#">78977</a>     | popeye domain containing 3        | <a href="#">Popdc3</a>             | 2.381 | 4.599  | 0.00230218  | 0.0240437   |
| 266 | 10360391 | <a href="#">NM_001045481</a>       | <a href="#">15950</a>     | interferon activated gene 203     | <a href="#">Ifi203</a>             | 2.379 | 4.591  | 0.0023258   | 0.02416     |
| 267 | 10584595 | <a href="#">ENSMUST00000098868</a> | <a href="#">70455</a>     | RIKEN cDNA 2610203C20<br>gene     | <a href="#">2610203C20Rik</a>      | 2.379 | 15.622 | 7.98261e-07 | 0.000124642 |
| 268 | 10496359 | <a href="#">NM_016885</a>          | <a href="#">59308</a>     | endomucin                         | <a href="#">Emcn</a>               | 2.37  | 4.531  | 0.00250042  | 0.0254055   |
| 269 | 10369023 | <a href="#">ENSMUST00000020064</a> | <a href="#">77296</a>     | RIKEN cDNA 9430073N08<br>gene     | <a href="#">9430073N08Rik</a>      | 2.365 | 4.314  | 0.00327018  | 0.0303666   |
| 270 | 10351111 | <a href="#">NR_002870</a>          | <a href="#">474332</a>    | dynamin 3, opposite strand        | <a href="#">Dnm3os</a>             | 2.364 | 8.244  | 6.36533e-05 | 0.0020557   |
| 271 | 10586744 | <a href="#">NM_007585</a>          | <a href="#">12306</a>     | annexin A2                        | <a href="#">Anxa2</a>              | 2.364 | 9.739  | 2.09202e-05 | 0.000976462 |
| 272 | 10358631 | <a href="#">NM_001024720</a>       | <a href="#">545370</a>    | hemimentin 1                      | <a href="#">Hmcn1</a>              | 2.361 | 3.506  | 0.00945295  | 0.065254    |
| 273 | 10514054 | <a href="#">NM_001113209</a>       | <a href="#">18028</a>     | nuclear factor I/B                | <a href="#">Nfib</a>               | 2.353 | 8.434  | 5.47862e-05 | 0.00186146  |
| 274 | 10453759 |                                    |                           |                                   |                                    | 2.35  | 4.015  | 0.0047852   | 0.0398968   |
| 275 | 10358593 | <a href="#">NM_001024720</a>       | <a href="#">545370</a>    | hemimentin 1                      | <a href="#">Hmcn1</a>              | 2.347 | 3.845  | 0.00598342  | 0.0468915   |
| 276 | 10602840 | <a href="#">NM_021389</a>          | <a href="#">58194</a>     | SH3-domain kinase binding prot    | <a href="#">Sh3kbp1</a>            | 2.345 | 8.409  | 5.58636e-05 | 0.00186897  |
| 277 | 10358591 | <a href="#">NM_001024720</a>       | <a href="#">545370</a>    | hemimentin 1                      | <a href="#">Hmcn1</a>              | 2.344 | 5.905  | 0.00053349  | 0.00847492  |
| 278 | 10551883 | <a href="#">NM_011662</a>          | <a href="#">22177</a>     | TYRO protein tyrosine kinase b    | <a href="#">Tyrobp</a>             | 2.339 | 13.499 | 2.21823e-06 | 0.000225492 |
| 279 | 10366746 | <a href="#">NM_177152</a>          | <a href="#">320398</a>    | leucine-rich repeats and immun    | <a href="#">Lrig3</a>              | 2.338 | 9.294  | 2.86656e-05 | 0.00119931  |
| 280 | 10409876 | <a href="#">NM_007796</a>          | <a href="#">13024</a>     | cytotoxic T lymphocyte-associa    | <a href="#">Ctla2a</a>             | 2.338 | 6.923  | 0.000197696 | 0.0043708   |
| 281 | 10492689 | <a href="#">NM_019971</a>          | <a href="#">54635</a>     | platelet-derived growth factor    | <a href="#">Pdgfc</a>              | 2.338 | 20.168 | 1.31299e-07 | 4.16289e-05 |
| 282 | 10456046 | <a href="#">NM_008809</a>          | <a href="#">18596</a>     | platelet derived growth factor    | <a href="#">Pdgfrb</a>             | 2.336 | 8.211  | 6.5352e-05  | 0.00206613  |
| 283 | 10347792 | <a href="#">AY169784</a>           | <a href="#">16367</a>     | insulin receptor substrate 1      | <a href="#">Irs1</a>               | 2.336 | 14.816 | 1.15747e-06 | 0.000154896 |
| 284 | 10423971 | <a href="#">NM_138674</a>          | <a href="#">192190</a>    | polycystic kidney and hepatic     | <a href="#">Pkhdl1l</a>            | 2.335 | 4.296  | 0.00334293  | 0.0308275   |
| 285 | 10469457 | <a href="#">NM_026162</a>          | <a href="#">67448</a>     | plexin domain containing 2        | <a href="#">Plxdc2</a>             | 2.331 | 10.986 | 9.21353e-06 | 0.000580629 |
| 286 | 10424140 | <a href="#">NM_181277</a>          | <a href="#">12818</a>     | collagen, type XIV, alpha 1       | <a href="#">Col14a1</a>            | 2.331 | 4.356  | 0.0031016   | 0.0293686   |
| 287 | 10593293 | <a href="#">NM_001081445</a>       | <a href="#">17967</a>     | neural cell adhesion molecule     | <a href="#">Ncam1</a>              | 2.324 | 8.059  | 7.39051e-05 | 0.00226017  |
| 288 | 10375259 | <a href="#">NM_008070</a>          | <a href="#">14401</a>     | gamma-aminobutyric acid<br>(GABA- | <a href="#">Gabrb2</a>             | 2.323 | 4.224  | 0.00366401  | 0.0328828   |
| 289 | 10346843 | <a href="#">NM_001077403</a>       | <a href="#">18187</a>     | neuropilin 2                      | <a href="#">Nrp2</a>               | 2.32  | 8.953  | 3.68298e-05 | 0.00140819  |
| 290 | 10376778 | <a href="#">NM_029568</a>          | <a href="#">76293</a>     | microfibrillar-associated prot    | <a href="#">Mfap4</a>              | 2.319 | 6.808  | 0.000219923 | 0.00469892  |
| 291 | 10407350 | <a href="#">NM_008002</a>          | <a href="#">14165</a>     | fibroblast growth factor 10       | <a href="#">Fgf10</a>              | 2.318 | 4.826  | 0.00175479  | 0.0195692   |
| 292 | 10502780 | <a href="#">NM_001081298</a>       | <a href="#">99633</a>     | latrophilin 2                     | <a href="#">Lphn2</a>              | 2.317 | 15.421 | 8.7422e-07  | 0.000129704 |
| 293 | 10512279 | <a href="#">NM_016673</a>          | <a href="#">12804</a>     | ciliary neurotrophic factor re    | <a href="#">Cntfr</a>              | 2.314 | 6.871  | 0.000207388 | 0.00453465  |
| 294 | 10358555 | <a href="#">NM_001024720</a>       | <a href="#">545370</a>    | hemimentin 1                      | <a href="#">Hmcn1</a>              | 2.308 | 4.131  | 0.00412397  | 0.0357073   |
| 295 | 10478928 | <a href="#">NM_080455</a>          | <a href="#">228911</a>    | teashirt zinc finger family me    | <a href="#">Tshz2</a>              | 2.305 | 17.82  | 3.15534e-07 | 6.80781e-05 |
| 296 | 10418171 | <a href="#">NM_001101433</a>       | <a href="#">71918</a>     | RIKEN cDNA 2310047A01<br>gene     | <a href="#">2310047A01Rik</a>      | 2.305 | 10.633 | 1.15206e-05 | 0.000665549 |
| 297 | 10551736 | <a href="#">NM_026731</a>          | <a href="#">68458</a>     | protein phosphatase 1, regulat    | <a href="#">Ppp1r14a</a>           | 2.304 | 9.629  | 2.25837e-05 | 0.00101814  |
| 298 | 10403796 | <a href="#">NM_175007</a>          | <a href="#">218038</a>    | amphiphysin                       | <a href="#">Amph</a>               | 2.295 | 4.781  | 0.00185104  | 0.020374    |
| 299 | 10368243 | <a href="#">NM_010167</a>          | <a href="#">14051</a>     | eyes absent 4 homolog (Drosoph    | <a href="#">Eya4</a>               | 2.293 | 9.641  | 2.23927e-05 | 0.00101169  |
| 300 | 10403579 | <a href="#">NM_181852</a>          | <a href="#">107849</a>    | prolactin family 2, subfamily     | <a href="#">Pr12c5</a>             | 2.291 | 6.134  | 0.000422131 | 0.00720964  |
| 301 | 10505073 | <a href="#">NM_172867</a>          | <a href="#">242466</a>    | zinc finger protein 462           | <a href="#">Zfp462</a>             | 2.289 | 17.07  | 4.27549e-07 | 8.37046e-05 |
| 302 | 10467013 | <a href="#">NM_001013833</a>       | <a href="#">19091</a>     | protein kinase, cGMP-dependent    | <a href="#">Prkg1</a>              | 2.284 | 4.403  | 0.00292542  | 0.028306    |
| 303 | 10604608 |                                    |                           |                                   |                                    | 2.279 | 4.268  | 0.00346515  | 0.0315806   |
| 304 | 10346321 | <a href="#">ENSMUST00000097736</a> | <a href="#">628004</a>    | predicted gene, EG628004          | <a href="#">EG628004</a>           | 2.279 | 3.277  | 0.0129818   | 0.0814258   |
| 305 | 10571788 | <a href="#">NM_009506</a>          | <a href="#">22341</a>     | vascular endothelial growth fa    | <a href="#">Vegfc</a>              | 2.279 | 6.497  | 0.000295329 | 0.00566646  |
| 306 | 10473384 | <a href="#">NM_021398</a>          | <a href="#">58207</a>     | solute carrier family 43, memb    | <a href="#">Slc43a3</a>            | 2.278 | 11.331 | 7.45404e-06 | 0.000508433 |

|     |          |                                    |                           |                                |                                    |       |        |             |             |
|-----|----------|------------------------------------|---------------------------|--------------------------------|------------------------------------|-------|--------|-------------|-------------|
| 307 | 10461614 | <a href="#">NM_028595</a>          | <a href="#">73656</a>     | membrane-spanning 4-domains, s | <a href="#">Ms4a6c</a>             | 2.275 | 8.772  | 4.21808e-05 | 0.00154839  |
| 308 | 10502778 | <a href="#">NM_001081298</a>       | <a href="#">99633</a>     | latrophilin 2                  | <a href="#">Lphn2</a>              | 2.27  | 7.719  | 9.79701e-05 | 0.00274155  |
| 309 | 10358625 | <a href="#">NM_001024720</a>       | <a href="#">545370</a>    | hemiceptin 1                   | <a href="#">Hmen1</a>              | 2.268 | 4.132  | 0.00411839  | 0.0356882   |
| 310 | 10368373 | <a href="#">NM_029881</a>          | <a href="#">77220</a>     | RIKEN cDNA C030003D03 gene     | <a href="#">C030003D03Rik</a>      | 2.262 | 8.679  | 4.52956e-05 | 0.00163435  |
| 311 | 10600836 | <a href="#">NM_010833</a>          | <a href="#">17698</a>     | moesin                         | <a href="#">Msn</a>                | 2.259 | 16.739 | 4.90908e-07 | 9.18563e-05 |
| 312 | 10358605 | <a href="#">NM_001024720</a>       | <a href="#">545370</a>    | hemiceptin 1                   | <a href="#">Hmen1</a>              | 2.251 | 6.437  | 0.000313017 | 0.00586221  |
| 313 | 10497265 | <a href="#">NM_024406</a>          | <a href="#">11770</a>     | fatty acid binding protein 4,  | <a href="#">Fabp4</a>              | 2.247 | 4.158  | 0.00398259  | 0.0348832   |
| 314 | 10513004 | <a href="#">ENSMUST00000098069</a> | <a href="#">100038677</a> | predicted gene, ENSMUSG0000007 | <a href="#">ENSMUSG00000073850</a> | 2.244 | 3.456  | 0.010115    | 0.0685504   |
| 315 | 10482866 | <a href="#">AK156640</a>           | <a href="#">100038415</a> | predicted gene, ENSMUSG0000007 | <a href="#">ENSMUSG00000075328</a> | 2.232 | 12.112 | 4.70731e-06 | 0.000367274 |
| 316 | 10358597 | <a href="#">NM_001024720</a>       | <a href="#">545370</a>    | hemiceptin 1                   | <a href="#">Hmen1</a>              | 2.231 | 3.358  | 0.0115922   | 0.0750934   |
| 317 | 10360920 | <a href="#">NM_009367</a>          | <a href="#">21808</a>     | transforming growth factor, be | <a href="#">Tgfb2</a>              | 2.225 | 8.913  | 3.79244e-05 | 0.00142498  |
| 318 | 10502772 | <a href="#">NM_001081298</a>       | <a href="#">99633</a>     | latrophilin 2                  | <a href="#">Lphn2</a>              | 2.223 | 11.196 | 8.08938e-06 | 0.000528933 |
| 319 | 10544583 | <a href="#">NM_153175</a>          | <a href="#">231931</a>    | GTPase, IMAP family member 6   | <a href="#">Gimap6</a>             | 2.221 | 10.095 | 1.64061e-05 | 0.000829823 |
| 320 | 10353460 | <a href="#">NM_023872</a>          | <a href="#">226922</a>    | potassium voltage-gated channe | <a href="#">Kcnq5</a>              | 2.22  | 6.646  | 0.000255947 | 0.00516956  |
| 321 | 10452427 |                                    |                           |                                |                                    | 2.219 | 6.827  | 0.000215976 | 0.00466946  |
| 322 | 10374406 | <a href="#">NM_029861</a>          | <a href="#">380686</a>    | cannabinoid receptor interacti | <a href="#">Cnrip1</a>             | 2.217 | 11.225 | 7.94899e-06 | 0.000526876 |
| 323 | 10554863 | <a href="#">NM_001040085</a>       | <a href="#">83671</a>     | synaptotagmin-like 2           | <a href="#">Sytl2</a>              | 2.216 | 7.474  | 0.000120867 | 0.00314805  |
| 324 | 10472965 | <a href="#">NM_008276</a>          | <a href="#">15437</a>     | homeo box D8                   | <a href="#">Hoxd8</a>              | 2.212 | 4.029  | 0.00470392  | 0.0394838   |
| 325 | 10484201 | <a href="#">ENSMUST00000049544</a> | <a href="#">545428</a>    | RIKEN cDNA 2610301F02 gene     | <a href="#">2610301F02Rik</a>      | 2.212 | 3.891  | 0.00563161  | 0.0450359   |
| 326 | 10412921 | <a href="#">NM_008695</a>          | <a href="#">18074</a>     | nidogen 2                      | <a href="#">Nid2</a>               | 2.211 | 7.506  | 0.000117544 | 0.00309835  |
| 327 | 10458731 | <a href="#">NM_001085373</a>       | <a href="#">328949</a>    | mutated in colorectal cancers  | <a href="#">Mcc</a>                | 2.211 | 11.331 | 7.45432e-06 | 0.000508433 |
| 328 | 10392221 | <a href="#">NM_008816</a>          | <a href="#">18613</a>     | platelet/endothelial cell adhe | <a href="#">Pecam1</a>             | 2.209 | 11.733 | 5.86393e-06 | 0.000424613 |
| 329 | 10358609 | <a href="#">NM_001024720</a>       | <a href="#">545370</a>    | hemiceptin 1                   | <a href="#">Hmen1</a>              | 2.207 | 5.346  | 0.000970158 | 0.0128528   |
| 330 | 10536845 | <a href="#">NM_001081185</a>       | <a href="#">68794</a>     | filamin C, gamma (actin bindin | <a href="#">Flnc</a>               | 2.191 | 9.294  | 2.86572e-05 | 0.00119931  |
| 331 | 10436519 | <a href="#">NM_019413</a>          | <a href="#">19876</a>     | roundabout homolog 1 (Drosophi | <a href="#">Robo1</a>              | 2.189 | 9.852  | 1.93426e-05 | 0.0009295   |
| 332 | 10458906 | <a href="#">NM_008908</a>          | <a href="#">19038</a>     | peptidylprolyl isomerase C     | <a href="#">Ppic</a>               | 2.187 | 10.743 | 1.07356e-05 | 0.000636968 |
| 333 | 10358733 | <a href="#">NM_016846</a>          | <a href="#">19731</a>     | ral guanine nucleotide dissoci | <a href="#">Rgl1</a>               | 2.186 | 5.492  | 0.000826641 | 0.011499    |
| 334 | 10517513 | <a href="#">NM_007574</a>          | <a href="#">12262</a>     | complement component 1, q subc | <a href="#">C1qc</a>               | 2.186 | 6.974  | 0.000188534 | 0.00422741  |
| 335 | 10483081 | <a href="#">NM_007986</a>          | <a href="#">14089</a>     | fibroblast activation protein  | <a href="#">Fap</a>                | 2.175 | 2.987  | 0.0196193   | 0.108456    |
| 336 | 10492021 | <a href="#">NM_015784</a>          | <a href="#">50706</a>     | periostin, osteoblast specific | <a href="#">Postn</a>              | 2.175 | 4.97   | 0.00148425  | 0.0172257   |
| 337 | 10400607 | <a href="#">AK163637</a>           | <a href="#">320772</a>    | MAM domain containing glycosyl | <a href="#">Mdga2</a>              | 2.168 | 8.99   | 3.58157e-05 | 0.00138235  |
| 338 | 10484197 | <a href="#">ENSMUST00000049544</a> | <a href="#">545428</a>    | RIKEN cDNA 2610301F02 gene     | <a href="#">2610301F02Rik</a>      | 2.167 | 7.007  | 0.000182975 | 0.00417349  |
| 339 | 10531195 | <a href="#">NM_001081401</a>       | <a href="#">330119</a>    | a disintegrin-like and metallo | <a href="#">Adamts3</a>            | 2.163 | 3.388  | 0.0111166   | 0.0729285   |
| 340 | 10500276 | <a href="#">BC028528</a>           | <a href="#">229600</a>    | cDNA sequence BC028528         | <a href="#">BC028528</a>           | 2.162 | 7.07   | 0.000172829 | 0.00401571  |
| 341 | 10504203 | <a href="#">AK006581</a>           | <a href="#">75952</a>     | RIKEN cDNA 4930578G10 gene     | <a href="#">4930578G10Rik</a>      | 2.161 | 2.464  | 0.0422278   | 0.179868    |
| 342 | 10592067 | <a href="#">NM_008026</a>          | <a href="#">14247</a>     | Friend leukemia integration 1  | <a href="#">Fli1</a>               | 2.158 | 7.301  | 0.00014058  | 0.00344552  |
| 343 | 10412345 | <a href="#">NM_001081009</a>       | <a href="#">52552</a>     | poly (ADP-ribose) polymerase f | <a href="#">Parp8</a>              | 2.153 | 6.46   | 0.000306109 | 0.00579961  |
| 344 | 10380699 | <a href="#">NM_019877</a>          | <a href="#">56358</a>     | coatamer protein complex, subu | <a href="#">Copz2</a>              | 2.152 | 9.266  | 2.9249e-05  | 0.00120789  |
| 345 | 10591116 | <a href="#">NM_001080814</a>       | <a href="#">270120</a>    | FAT tumor suppressor homolog 3 | <a href="#">Fat3</a>               | 2.148 | 3.691  | 0.00735124  | 0.0545959   |
| 346 | 10472398 | <a href="#">NM_001099298</a>       | <a href="#">110876</a>    | sodium channel, voltage-gated, | <a href="#">Scn2a1</a>             | 2.147 | 3.975  | 0.00504666  | 0.0415985   |
| 347 | 10388042 | <a href="#">NM_134022</a>          | <a href="#">103712</a>    | RIKEN cDNA 6330403K07 gene     | <a href="#">6330403K07Rik</a>      | 2.146 | 9.101  | 3.29831e-05 | 0.00131336  |
| 348 | 10492682 | <a href="#">NM_133187</a>          | <a href="#">68659</a>     | RIKEN cDNA 1110032E23 gene     | <a href="#">1110032E23Rik</a>      | 2.146 | 11.193 | 8.10511e-06 | 0.000528933 |
| 349 | 10423243 | <a href="#">NM_009865</a>          | <a href="#">320873</a>    | cadherin 10                    | <a href="#">Cdh10</a>              | 2.145 | 7.089  | 0.000169839 | 0.0039593   |
| 350 | 10368647 | <a href="#">NM_172508</a>          | <a href="#">212898</a>    | dermatan sulfate epimerase     | <a href="#">Dse</a>                | 2.145 | 9.918  | 1.84963e-05 | 0.00089827  |
| 351 | 10549282 | <a href="#">NM_019923</a>          | <a href="#">16439</a>     | inositol 1,4,5-triphosphate re | <a href="#">Itp2</a>               | 2.145 | 15.731 | 7.60122e-07 | 0.000123015 |
| 352 | 10364444 | <a href="#">NM_013591</a>          | <a href="#">17123</a>     | mucosal vascular addressin cel | <a href="#">Madcaml</a>            | 2.144 | 7.974  | 7.92579e-05 | 0.00236365  |
| 353 | 10464400 | <a href="#">ENSMUST00000065383</a> | <a href="#">107376</a>    | RIKEN cDNA E330013P04 gene     | <a href="#">E330013P04Rik</a>      | 2.144 | 9.034  | 3.46557e-05 | 0.00135547  |
| 354 | 10381298 | <a href="#">NM_019444</a>          | <a href="#">54409</a>     | receptor (calcitonin) activity | <a href="#">Ramp2</a>              | 2.14  | 7.905  | 8.39102e-05 | 0.00246416  |
| 355 | 10501586 | <a href="#">NM_007901</a>          | <a href="#">13609</a>     | sphingosine-1-phosphate recept | <a href="#">S1pr1</a>              | 2.14  | 6.152  | 0.000414604 | 0.00713294  |

|     |          |                                    |                           |                                    |                                    |       |        |             |             |
|-----|----------|------------------------------------|---------------------------|------------------------------------|------------------------------------|-------|--------|-------------|-------------|
| 356 | 10521700 | <a href="#">ENSMUST00000087486</a> | <a href="#">100126871</a> | predicted gene,<br>ENSMUSG0000006  | <a href="#">ENSMUSG00000067356</a> | 2.137 | 4.685  | 0.00207531  | 0.0223423   |
| 357 | 10417713 | <a href="#">NM_011243</a>          | <a href="#">218772</a>    | retinoic acid receptor, beta       | <a href="#">Rarb</a>               | 2.137 | 4.852  | 0.00170208  | 0.0190821   |
| 358 | 10469167 | <a href="#">NM_177386</a>          | <a href="#">353282</a>    | Scm-like with four mbt domains     | <a href="#">Sfmbt2</a>             | 2.133 | 6.294  | 0.000359911 | 0.00641108  |
| 359 | 10422598 | <a href="#">NM_009155</a>          | <a href="#">20363</a>     | selenoprotein P, plasma, 1         | <a href="#">Sepp1</a>              | 2.129 | 5.842  | 0.000569347 | 0.00888721  |
| 360 | 10599927 | <a href="#">NM_008032</a>          | <a href="#">14266</a>     | AF4/FMR2 family, member 2          | <a href="#">Aff2</a>               | 2.129 | 4.937  | 0.00154254  | 0.0177547   |
| 361 | 10536635 | <a href="#">NM_001081351</a>       | <a href="#">214642</a>    | RIKEN cDNA A430107O13<br>gene      | <a href="#">A430107O13Rik</a>      | 2.129 | 5.535  | 0.000788645 | 0.0111316   |
| 362 | 10494548 | <a href="#">NM_008121</a>          | <a href="#">14613</a>     | gap junction membrane channel      | <a href="#">Gja5</a>               | 2.126 | 8.15   | 6.86437e-05 | 0.00213441  |
| 363 | 10497149 | <a href="#">NM_026582</a>          | <a href="#">68151</a>     | G protein-coupled receptor 177     | <a href="#">Gpr177</a>             | 2.126 | 16.278 | 5.97737e-07 | 0.000102722 |
| 364 | 10558769 | <a href="#">NM_026820</a>          | <a href="#">68713</a>     | interferon induced transmembra     | <a href="#">Ifitm1</a>             | 2.124 | 4.535  | 0.00248921  | 0.0253525   |
| 365 | 10362097 | <a href="#">BC132022</a>           | <a href="#">19369</a>     | retinoic acid early transcript     | <a href="#">Raet1b</a>             | 2.121 | 5.487  | 0.000830654 | 0.0115242   |
| 366 | 10384233 | <a href="#">NM_001083587</a>       | <a href="#">319939</a>    | tensin 3                           | <a href="#">Tns3</a>               | 2.12  | 5.889  | 0.000542213 | 0.00858125  |
| 367 | 10492402 | <a href="#">NM_010597</a>          | <a href="#">16497</a>     | potassium voltage-gated channe     | <a href="#">Kcnab1</a>             | 2.119 | 14.896 | 1.11475e-06 | 0.000151092 |
| 368 | 10428376 | <a href="#">NM_009640</a>          | <a href="#">11600</a>     | angiopoietin 1                     | <a href="#">Angpt1</a>             | 2.119 | 4.318  | 0.003252    | 0.0302376   |
| 369 | 10582958 | <a href="#">NM_001033322</a>       | <a href="#">234889</a>    | guanylate cyclase 1, soluble,      | <a href="#">Gucyl1a2</a>           | 2.119 | 6.134  | 0.000422093 | 0.00720964  |
| 370 | 10477920 | <a href="#">BC049974</a>           | <a href="#">98932</a>     | myosin, light polypeptide 9, r     | <a href="#">My19</a>               | 2.118 | 2.667  | 0.0312606   | 0.147777    |
| 371 | 10415766 | <a href="#">NM_172809</a>          | <a href="#">50720</a>     | sacsin                             | <a href="#">Sacs</a>               | 2.118 | 9.644  | 2.23404e-05 | 0.00101169  |
| 372 | 10385297 | <a href="#">NM_010250</a>          | <a href="#">14394</a>     | gamma-aminobutyric acid<br>(GABA-  | <a href="#">Gabra1</a>             | 2.113 | 4.341  | 0.00316111  | 0.0297721   |
| 373 | 10495794 | <a href="#">NM_153422</a>          | <a href="#">242202</a>    | phosphodiesterase 5A, cGMP-<br>spe | <a href="#">Pde5a</a>              | 2.112 | 7.173  | 0.000157581 | 0.00375213  |
| 374 | 10377841 | <a href="#">NM_029360</a>          | <a href="#">75604</a>     | transmembrane 4 superfamily me     | <a href="#">Tm4sf5</a>             | 2.111 | 6.047  | 0.000461128 | 0.00764028  |
| 375 | 10580473 | <a href="#">NM_033327</a>          | <a href="#">94187</a>     | zinc finger protein 423            | <a href="#">Zfp423</a>             | 2.109 | 7.84   | 8.85291e-05 | 0.00258544  |
| 376 | 10498972 | <a href="#">XM_907666</a>          | <a href="#">633285</a>    | predicted gene, EG633285           | <a href="#">EG633285</a>           | 2.109 | 9.906  | 1.86448e-05 | 0.000902119 |
| 377 | 10373073 | <a href="#">NM_028027</a>          | <a href="#">52666</a>     | DNA segment, Chr 10, ERATO<br>Doi  | <a href="#">D10Ertd610e</a>        | 2.107 | 11.01  | 9.07914e-06 | 0.000579968 |
| 378 | 10462922 | <a href="#">NM_019588</a>          | <a href="#">74055</a>     | phospholipase C, epsilon 1         | <a href="#">Plice1</a>             | 2.104 | 6.828  | 0.000215825 | 0.00466946  |
| 379 | 10358490 | <a href="#">NM_001024720</a>       | <a href="#">545370</a>    | hemicentin 1                       | <a href="#">Hmcn1</a>              | 2.103 | 5.484  | 0.000834    | 0.0115341   |
| 380 | 10553477 | <a href="#">NM_177694</a>          | <a href="#">233246</a>    | transmembrane protein 16E          | <a href="#">Tmem16e</a>            | 2.099 | 10.919 | 9.60563e-06 | 0.00059364  |
| 381 | 10485711 | <a href="#">BC027250</a>           | <a href="#">67606</a>     | RIKEN cDNA 1110018M03<br>gene      | <a href="#">1110018M03Rik</a>      | 2.094 | 7.26   | 0.000145721 | 0.00353339  |
| 382 | 10353309 | <a href="#">AK081751</a>           | <a href="#">57339</a>     | junctionophilin 1                  | <a href="#">Jph1</a>               | 2.094 | 7.694  | 0.000100057 | 0.00277806  |
| 383 | 10358629 | <a href="#">NM_001024720</a>       | <a href="#">545370</a>    | hemicentin 1                       | <a href="#">Hmcn1</a>              | 2.091 | 2.482  | 0.041124    | 0.176733    |
| 384 | 10358599 | <a href="#">NM_001024720</a>       | <a href="#">545370</a>    | hemicentin 1                       | <a href="#">Hmcn1</a>              | 2.088 | 3.456  | 0.0101195   | 0.0685569   |
| 385 | 10358627 | <a href="#">NM_001024720</a>       | <a href="#">545370</a>    | hemicentin 1                       | <a href="#">Hmcn1</a>              | 2.083 | 5.152  | 0.00120514  | 0.0150599   |
| 386 | 10358589 | <a href="#">NM_001024720</a>       | <a href="#">545370</a>    | hemicentin 1                       | <a href="#">Hmcn1</a>              | 2.083 | 5.303  | 0.00101737  | 0.0133115   |
| 387 | 10451679 | <a href="#">NM_001008231</a>       | <a href="#">76441</a>     | dishevelled associated activat     | <a href="#">Daam2</a>              | 2.081 | 6.594  | 0.000268893 | 0.00533347  |
| 388 | 10587231 | <a href="#">NM_007555</a>          | <a href="#">12160</a>     | bone morphogenetic protein 5       | <a href="#">Bmp5</a>               | 2.08  | 4.981  | 0.00146444  | 0.017079    |
| 389 | 10405179 | <a href="#">NM_010101</a>          | <a href="#">13610</a>     | endothelial differentiation, s     | <a href="#">Edg3</a>               | 2.079 | 9.283  | 2.88963e-05 | 0.00120036  |
| 390 | 10358607 | <a href="#">NM_001024720</a>       | <a href="#">545370</a>    | hemicentin 1                       | <a href="#">Hmcn1</a>              | 2.077 | 3.153  | 0.015477    | 0.0923988   |
| 391 | 10464251 | <a href="#">NM_181415</a>          | <a href="#">226255</a>    | attractin like 1                   | <a href="#">Atrnl1</a>             | 2.074 | 9.714  | 2.12841e-05 | 0.00098691  |
| 392 | 10604799 | <a href="#">NM_001037863</a>       | <a href="#">320940</a>    | Atpase, class VI, type 11C         | <a href="#">Atp11c</a>             | 2.068 | 7.373  | 0.000131971 | 0.003318    |
| 393 | 10395466 | <a href="#">NM_172803</a>          | <a href="#">238130</a>    | dedicator of cytokinesis 4         | <a href="#">Dock4</a>              | 2.067 | 9.328  | 2.79631e-05 | 0.00118321  |
| 394 | 10348451 | <a href="#">NM_007722</a>          | <a href="#">12778</a>     | chemokine (C-X-C motif) recept     | <a href="#">Cxcr7</a>              | 2.067 | 7.403  | 0.000128494 | 0.00327174  |
| 395 | 10427303 | <a href="#">NM_013553</a>          | <a href="#">15423</a>     | homeo box C4                       | <a href="#">Hoxc4</a>              | 2.066 | 4.757  | 0.00190459  | 0.0208549   |
| 396 | 10352905 | <a href="#">NM_001111059</a>       | <a href="#">12490</a>     | CD34 antigen                       | <a href="#">Cd34</a>               | 2.064 | 6.521  | 0.00028845  | 0.00558005  |
| 397 | 10523134 | <a href="#">NM_019932</a>          | <a href="#">56744</a>     | platelet factor 4                  | <a href="#">Pf4</a>                | 2.063 | 3.155  | 0.0154351   | 0.09227     |
| 398 | 10570963 | <a href="#">NM_177086</a>          | <a href="#">320158</a>    | zinc finger, matrin type 4         | <a href="#">Zmat4</a>              | 2.059 | 5.024  | 0.00139475  | 0.0166332   |
| 399 | 10435641 | <a href="#">NM_008047</a>          | <a href="#">14314</a>     | follistatin-like 1                 | <a href="#">Fstl1</a>              | 2.059 | 7.665  | 0.000102632 | 0.00282558  |
| 400 | 10365482 | <a href="#">NM_011595</a>          | <a href="#">21859</a>     | tissue inhibitor of metallopro     | <a href="#">Timp3</a>              | 2.057 | 7.825  | 8.9643e-05  | 0.00260359  |
| 401 | 10547686 |                                    |                           |                                    |                                    | 2.056 | 7.489  | 0.00011926  | 0.00312471  |
| 402 | 10519998 | <a href="#">NM_028977</a>          | <a href="#">74511</a>     | leucine rich repeat containing     | <a href="#">Lrrc17</a>             | 2.052 | 7.205  | 0.000153132 | 0.00366269  |
| 403 | 10487987 | <a href="#">NM_177303</a>          | <a href="#">320974</a>    | RIKEN cDNA B430119L13<br>gene      | <a href="#">B430119L13Rik</a>      | 2.051 | 12.026 | 4.9443e-06  | 0.000373365 |
| 404 | 10559177 | <a href="#">AK044960</a>           | <a href="#">436015</a>    | predicted gene,<br>ENSMUSG0000003  | <a href="#">ENSMUSG00000038442</a> | 2.049 | 8.561  | 4.95847e-05 | 0.00172721  |
| 405 | 10549097 | <a href="#">NM_008492</a>          | <a href="#">16832</a>     | lactate dehydrogenase B            | <a href="#">Ldhb</a>               | 2.048 | 12.429 | 3.93795e-06 | 0.000323592 |
| 406 | 10357833 | <a href="#">NM_213616</a>          | <a href="#">381290</a>    | ATPase, Ca++ transporting, pla     | <a href="#">Atp2b4</a>             | 2.045 | 8.434  | 5.47659e-05 | 0.00186146  |

|     |          |                                    |                           |                                |                                    |       |        |             |             |
|-----|----------|------------------------------------|---------------------------|--------------------------------|------------------------------------|-------|--------|-------------|-------------|
| 407 | 10529741 | <a href="#">NM_027295</a>          | <a href="#">100972</a>    | RAB28, member RAS oncogene fam | <a href="#">Rab28</a>              | 2.045 | 5.519  | 0.000802341 | 0.0112424   |
| 408 | 10531203 | <a href="#">NM_001081401</a>       | <a href="#">330119</a>    | a disintegrin-like and metallo | <a href="#">Adamts3</a>            | 2.043 | 8.464  | 5.34848e-05 | 0.00183287  |
| 409 | 10501063 | <a href="#">NM_007651</a>          | <a href="#">12508</a>     | CD53 antigen                   | <a href="#">Cd53</a>               | 2.043 | 6.619  | 0.000262793 | 0.00526683  |
| 410 | 10554938 | <a href="#">NM_029494</a>          | <a href="#">75985</a>     | RAB30, member RAS oncogene fam | <a href="#">Rab30</a>              | 2.039 | 7.732  | 9.69523e-05 | 0.0027299   |
| 411 | 10570855 | <a href="#">NM_008872</a>          | <a href="#">18791</a>     | plasminogen activator, tissue  | <a href="#">Plat</a>               | 2.036 | 10.717 | 1.09186e-05 | 0.000637742 |
| 412 | 10400515 | <a href="#">NM_009147</a>          | <a href="#">20334</a>     | SEC23A (S. cerevisiae)         | <a href="#">Sec23a</a>             | 2.036 | 9.268  | 2.92154e-05 | 0.00120789  |
| 413 | 10502451 | <a href="#">NM_007560</a>          | <a href="#">12167</a>     | bone morphogenetic protein rec | <a href="#">Bmpr1b</a>             | 2.034 | 3.866  | 0.00581578  | 0.0460213   |
| 414 | 10475218 | <a href="#">ENSMUST00000028734</a> | <a href="#">668880</a>    | START domain containing 9      | <a href="#">Stard9</a>             | 2.033 | 5.441  | 0.000873631 | 0.0119021   |
| 415 | 10446282 | <a href="#">NM_010130</a>          | <a href="#">13733</a>     | EGF-like module containing, mu | <a href="#">Emr1</a>               | 2.033 | 5.744  | 0.000631205 | 0.00954664  |
| 416 | 10521243 | <a href="#">NM_019497</a>          | <a href="#">14772</a>     | G protein-coupled receptor kin | <a href="#">Grk4</a>               | 2.031 | 6.388  | 0.000328282 | 0.00605161  |
| 417 | 10468879 |                                    |                           |                                |                                    | 2.024 | 3.576  | 0.00857967  | 0.0608753   |
| 418 | 10579776 | <a href="#">NM_030113</a>          | <a href="#">78514</a>     | Rho GTPase activating protein  | <a href="#">Arhgap10</a>           | 2.023 | 5.803  | 0.000592894 | 0.00916385  |
| 419 | 10502770 | <a href="#">NM_001081298</a>       | <a href="#">99633</a>     | latrophilin 2                  | <a href="#">Lphn2</a>              | 2.023 | 5.392  | 0.000921435 | 0.0124015   |
| 420 | 10400170 | <a href="#">NM_008858</a>          | <a href="#">18760</a>     | protein kinase D1              | <a href="#">Prkd1</a>              | 2.019 | 6.709  | 0.000241164 | 0.00500409  |
| 421 | 10547100 | <a href="#">NM_026376</a>          | <a href="#">67784</a>     | plexin D1                      | <a href="#">Plxnd1</a>             | 2.015 | 10.141 | 1.59028e-05 | 0.00081416  |
| 422 | 10436456 | <a href="#">NM_011173</a>          | <a href="#">19128</a>     | protein S (alpha)              | <a href="#">Pros1</a>              | 2.014 | 10.841 | 1.00878e-05 | 0.000612923 |
| 423 | 10362091 | <a href="#">NM_020030</a>          | <a href="#">56554</a>     | retinoic acid early transcript | <a href="#">Raet1d</a>             | 2.013 | 3.543  | 0.00897547  | 0.0628593   |
| 424 | 10514070 | <a href="#">BC066147</a>           | <a href="#">76455</a>     | RIKEN cDNA 2310067E19 gene     | <a href="#">2310067E19Rik</a>      | 2.008 | 11.209 | 8.02839e-06 | 0.000528824 |
| 425 | 10591125 | <a href="#">NM_001080814</a>       | <a href="#">270120</a>    | FAT tumor suppressor homolog 3 | <a href="#">Fat3</a>               | 2.007 | 4.351  | 0.00312346  | 0.0294964   |
| 426 | 10468309 | <a href="#">AK009333</a>           | <a href="#">69633</a>     | RIKEN cDNA 2310014D11 gene     | <a href="#">2310014D11Rik</a>      | 2.007 | 9.589  | 2.3228e-05  | 0.00103179  |
| 427 | 10440258 | <a href="#">NM_010140</a>          | <a href="#">13837</a>     | Eph receptor A3                | <a href="#">Epha3</a>              | 2.006 | 4.841  | 0.00172468  | 0.0192843   |
| 428 | 10427336 | <a href="#">NM_153505</a>          | <a href="#">105855</a>    | NCK associated protein 1 like  | <a href="#">Nekap11</a>            | 2.006 | 6.499  | 0.000294716 | 0.00565984  |
| 429 | 10416215 | <a href="#">NM_033325</a>          | <a href="#">94352</a>     | lysyl oxidase-like 2           | <a href="#">Lox12</a>              | 2.004 | 8.568  | 4.93241e-05 | 0.00172382  |
| 430 | 10445268 | <a href="#">NM_001081178</a>       | <a href="#">224792</a>    | G protein-coupled receptor 116 | <a href="#">Gpr116</a>             | 2.004 | 7.591  | 0.000109283 | 0.00296023  |
| 431 | 10435752 | <a href="#">NM_175548</a>          | <a href="#">268890</a>    | limbic system-associated membr | <a href="#">Lsamp</a>              | 2.003 | 4.996  | 0.00143977  | 0.016875    |
| 432 | 10604713 | <a href="#">NM_152801</a>          | <a href="#">73341</a>     | Rac/Cdc42 guanine nucleotide e | <a href="#">Arhgef6</a>            | 2.001 | 4.592  | 0.00232077  | 0.0241314   |
| 433 | 10369102 | <a href="#">ENSMUST00000095691</a> | <a href="#">100038725</a> | predicted gene, ENSMUSG0000003 | <a href="#">ENSMUSG00000038594</a> | 2.001 | 6.033  | 0.000467848 | 0.00769511  |
| 434 | 10544573 | <a href="#">NM_027852</a>          | <a href="#">71660</a>     | retinoic acid receptor respond | <a href="#">Rarres2</a>            | 2     | 6.277  | 0.000366222 | 0.00649646  |
| 435 | 10427904 | <a href="#">BC050864</a>           | <a href="#">448987</a>    | F-box and leucine-rich repeat  | <a href="#">Fbxl7</a>              | 1.998 | 4.28   | 0.00341415  | 0.0312912   |
| 436 | 10368585 | <a href="#">NM_001013411</a>       | <a href="#">432450</a>    | Na+/K+ transporting ATPase int | <a href="#">Nkain2</a>             | 1.997 | 4.02   | 0.00475625  | 0.0397482   |
| 437 | 10358635 | <a href="#">NM_001024720</a>       | <a href="#">545370</a>    | hemicentin 1                   | <a href="#">Hmcn1</a>              | 1.996 | 7.699  | 9.97027e-05 | 0.00277383  |
| 438 | 10356084 | <a href="#">NM_010570</a>          | <a href="#">16367</a>     | insulin receptor substrate 1   | <a href="#">Irs1</a>               | 1.996 | 10.887 | 9.79936e-06 | 0.000598837 |
| 439 | 10489759 | <a href="#">NM_028072</a>          | <a href="#">72043</a>     | sulfatase 2                    | <a href="#">Sulf2</a>              | 1.994 | 5.506  | 0.000813682 | 0.0113636   |
| 440 | 10580033 | <a href="#">NM_011925</a>          | <a href="#">26364</a>     | CD97 antigen                   | <a href="#">Cd97</a>               | 1.993 | 5.754  | 0.000624192 | 0.00948808  |
| 441 | 10395733 | <a href="#">NM_013780</a>          | <a href="#">27386</a>     | neuronal PAS domain protein 3  | <a href="#">Npas3</a>              | 1.992 | 6.719  | 0.000238936 | 0.00496762  |
| 442 | 10484203 | <a href="#">ENSMUST00000049544</a> | <a href="#">545428</a>    | RIKEN cDNA 2610301F02 gene     | <a href="#">2610301F02Rik</a>      | 1.99  | 6.063  | 0.000453497 | 0.00756735  |
| 443 | 10500295 | <a href="#">NM_023320</a>          | <a href="#">67220</a>     | pleckstrin homology domain con | <a href="#">Plekho1</a>            | 1.99  | 10.27  | 1.45896e-05 | 0.000761775 |
| 444 | 10584024 | <a href="#">NM_177906</a>          | <a href="#">330908</a>    | opioid binding protein/cell ad | <a href="#">Opml</a>               | 1.987 | 6.728  | 0.000237016 | 0.00494227  |
| 445 | 10594044 | <a href="#">NM_012043</a>          | <a href="#">26968</a>     | immunoglobulin superfamily con | <a href="#">Islr</a>               | 1.984 | 5.42   | 0.00089408  | 0.0121027   |
| 446 | 10600597 | <a href="#">NM_175771</a>          | <a href="#">192216</a>    | transmembrane protein 47       | <a href="#">Tmem47</a>             | 1.983 | 11.389 | 7.1973e-06  | 0.000495699 |
| 447 | 10394534 | <a href="#">NM_011859</a>          | <a href="#">23967</a>     | odd-skipped related 1 (Drosoph | <a href="#">Osr1</a>               | 1.981 | 3.102  | 0.0166397   | 0.0970498   |
| 448 | 10532085 | <a href="#">NM_011578</a>          | <a href="#">21814</a>     | transforming growth factor, be | <a href="#">Tgfbr3</a>             | 1.98  | 11.024 | 8.99978e-06 | 0.000578393 |
| 449 | 10358595 | <a href="#">NM_001024720</a>       | <a href="#">545370</a>    | hemicentin 1                   | <a href="#">Hmcn1</a>              | 1.98  | 3.552  | 0.00887451  | 0.0623605   |
| 450 | 10455721 | <a href="#">NM_026408</a>          | <a href="#">67847</a>     | synuclein, alpha interacting p | <a href="#">Sncap</a>              | 1.979 | 4.336  | 0.00318131  | 0.0298651   |
| 451 | 10503382 | <a href="#">NM_001111027</a>       | <a href="#">12395</a>     | runt-related transcription fac | <a href="#">Runx1t1</a>            | 1.978 | 10.092 | 1.64382e-05 | 0.000829823 |
| 452 | 10603003 |                                    |                           |                                |                                    | 1.976 | 4.325  | 0.00322538  | 0.0301093   |
| 453 | 10346098 |                                    |                           |                                |                                    | 1.974 | 4.904  | 0.0016022   | 0.0183009   |
| 454 | 10555027 | <a href="#">NM_010248</a>          | <a href="#">14389</a>     | growth factor receptor bound p | <a href="#">Gab2</a>               | 1.97  | 7.747  | 9.57394e-05 | 0.00271766  |
| 455 | 10371959 | <a href="#">NM_013508</a>          | <a href="#">13713</a>     | ELK3, member of ETS oncogene f | <a href="#">Elk3</a>               | 1.969 | 10.369 | 1.36751e-05 | 0.000738749 |
| 456 | 10521995 | <a href="#">ENSMUST00000101196</a> | <a href="#">319807</a>    | RIKEN cDNA 3110047P20 gene     | <a href="#">3110047P20Rik</a>      | 1.969 | 5.96   | 0.000504019 | 0.0081351   |
| 457 | 10481592 | <a href="#">NM_010065</a>          | <a href="#">13429</a>     | dynamin 1                      | <a href="#">Dnm1</a>               | 1.969 | 6.896  | 0.000202546 | 0.00445181  |
| 458 | 10358621 | <a href="#">NM_001024720</a>       | <a href="#">545370</a>    | hemicentin 1                   | <a href="#">Hmcn1</a>              | 1.963 | 6.827  | 0.000216063 | 0.00466946  |

|     |          |                                    |                           |                                |                                    |       |        |             |             |
|-----|----------|------------------------------------|---------------------------|--------------------------------|------------------------------------|-------|--------|-------------|-------------|
| 459 | 10604542 | <a href="#">NM_001077202</a>       | <a href="#">50786</a>     | heparan sulfate 6-O-sulfotrans | <a href="#">Hs6st2</a>             | 1.963 | 7.701  | 9.95296e-05 | 0.00277267  |
| 460 | 10362538 | <a href="#">NM_010681</a>          | <a href="#">16775</a>     | laminin, alpha 4               | <a href="#">Lama4</a>              | 1.961 | 6.381  | 0.000330623 | 0.00606651  |
| 461 | 10538305 | <a href="#">ENSMUST00000070587</a> | <a href="#">77580</a>     | RIKEN cDNA 5730596B20 gene     | <a href="#">5730596B20Rik</a>      | 1.956 | 6.315  | 0.000352751 | 0.00632617  |
| 462 | 10521622 | <a href="#">AK076499</a>           | <a href="#">399596</a>    | RIKEN cDNA 4833430A08 gene     | <a href="#">4833430A08Rik</a>      | 1.954 | 13.683 | 2.01893e-06 | 0.00021238  |
| 463 | 10523468 | <a href="#">NM_080708</a>          | <a href="#">140780</a>    | BMP2 inducible kinase          | <a href="#">Bmp2k</a>              | 1.954 | 5.152  | 0.00120418  | 0.0150569   |
| 464 | 10358547 | <a href="#">NM_001024720</a>       | <a href="#">545370</a>    | hemacentin 1                   | <a href="#">Hmcn1</a>              | 1.953 | 4.628  | 0.00222257  | 0.0234785   |
| 465 | 10543239 | <a href="#">NM_031198</a>          | <a href="#">21426</a>     | transcription factor EC        | <a href="#">Tcfec</a>              | 1.953 | 6.501  | 0.000294234 | 0.00565571  |
| 466 | 10477986 | <a href="#">NM_010923</a>          | <a href="#">18111</a>     | neuronatin                     | <a href="#">Nnat</a>               | 1.953 | 11.454 | 6.91743e-06 | 0.000477981 |
| 467 | 10514000 | <a href="#">NM_010820</a>          | <a href="#">17475</a>     | multiple PDZ domain protein    | <a href="#">Mpdz</a>               | 1.952 | 10.355 | 1.37974e-05 | 0.000740439 |
| 468 | 10561104 | <a href="#">NM_009465</a>          | <a href="#">26362</a>     | AXL receptor tyrosine kinase   | <a href="#">Axl</a>                | 1.951 | 6.598  | 0.000268055 | 0.00532453  |
| 469 | 10460968 | <a href="#">NM_011242</a>          | <a href="#">19395</a>     | RAS, guanyl releasing protein  | <a href="#">Rasgrp2</a>            | 1.95  | 10.435 | 1.30972e-05 | 0.000717426 |
| 470 | 10513256 | <a href="#">NM_010336</a>          | <a href="#">14745</a>     | lysophosphatidic acid receptor | <a href="#">Lpar1</a>              | 1.95  | 10.319 | 1.41296e-05 | 0.000751899 |
| 471 | 10346000 | <a href="#">NM_028450</a>          | <a href="#">70676</a>     | GULP, engulfment adaptor PTB d | <a href="#">Gulp1</a>              | 1.948 | 8.595  | 4.83077e-05 | 0.00170608  |
| 472 | 10458314 | <a href="#">BC046640</a>           | <a href="#">72512</a>     | transmembrane protein 173      | <a href="#">Tmem173</a>            | 1.947 | 7.556  | 0.000112617 | 0.00301032  |
| 473 | 10502776 | <a href="#">NM_001081298</a>       | <a href="#">99633</a>     | latrophilin 2                  | <a href="#">Lphn2</a>              | 1.946 | 9.013  | 3.51998e-05 | 0.0013674   |
| 474 | 10460541 | <a href="#">NM_054042</a>          | <a href="#">70445</a>     | CD248 antigen, endosialin      | <a href="#">Cd248</a>              | 1.945 | 7.145  | 0.000161556 | 0.00382954  |
| 475 | 10358551 | <a href="#">NM_001024720</a>       | <a href="#">545370</a>    | hemacentin 1                   | <a href="#">Hmcn1</a>              | 1.943 | 3.33   | 0.0120514   | 0.077029    |
| 476 | 10606369 | <a href="#">NM_008409</a>          | <a href="#">16431</a>     | integral membrane protein 2A   | <a href="#">Itm2a</a>              | 1.942 | 6.858  | 0.000209801 | 0.00456851  |
| 477 | 10495976 | <a href="#">NM_011098</a>          | <a href="#">18741</a>     | paired-like homeodomain transc | <a href="#">Pitx2</a>              | 1.941 | 6.254  | 0.000374566 | 0.00659985  |
| 478 | 10459335 | <a href="#">ENSMUST00000047480</a> | <a href="#">225617</a>    | RIKEN cDNA 9430028L06 gene     | <a href="#">9430028L06Rik</a>      | 1.936 | 9.825  | 1.97074e-05 | 0.000938499 |
| 479 | 10395978 | <a href="#">BC099503</a>           | <a href="#">217648</a>    | gene model 527, (NCBI)         | <a href="#">Gm527</a>              | 1.936 | 10.675 | 1.12091e-05 | 0.000649329 |
| 480 | 10551852 | <a href="#">NM_001081114</a>       | <a href="#">76686</a>     | CAP-GLY domain containing link | <a href="#">Clip3</a>              | 1.933 | 10.568 | 1.20099e-05 | 0.00068007  |
| 481 | 10484463 | <a href="#">NM_009776</a>          | <a href="#">12258</a>     | serine (or cysteine) peptidase | <a href="#">Serping1</a>           | 1.927 | 5.807  | 0.000590394 | 0.00913189  |
| 482 | 10360504 |                                    |                           |                                |                                    | 1.924 | 6.419  | 0.000318297 | 0.00592342  |
| 483 | 10506225 | <a href="#">NM_198037</a>          | <a href="#">320508</a>    | cache domain containing 1      | <a href="#">Cachd1</a>             | 1.921 | 10.121 | 1.61133e-05 | 0.000820961 |
| 484 | 10501468 | <a href="#">NM_030699</a>          | <a href="#">80883</a>     | netrin G1                      | <a href="#">Ntng1</a>              | 1.92  | 5.165  | 0.0011878   | 0.0148785   |
| 485 | 10512499 | <a href="#">NM_009416</a>          | <a href="#">22004</a>     | tropomyosin 2, beta            | <a href="#">Tpm2</a>               | 1.92  | 3.185  | 0.014786    | 0.0892989   |
| 486 | 10556491 | <a href="#">NM_026143</a>          | <a href="#">67420</a>     | male sterility domain containi | <a href="#">Mlst2</a>              | 1.92  | 10.104 | 1.63022e-05 | 0.00082859  |
| 487 | 10355500 | <a href="#">NM_010518</a>          | <a href="#">16011</a>     | insulin-like growth factor bin | <a href="#">Igfbp5</a>             | 1.918 | 5.798  | 0.000595966 | 0.00918447  |
| 488 | 10601492 | <a href="#">NM_177747</a>          | <a href="#">245595</a>    | zinc finger protein 711        | <a href="#">Zfp711</a>             | 1.918 | 7.39   | 0.000129999 | 0.00329581  |
| 489 | 10531197 | <a href="#">NM_001081401</a>       | <a href="#">330119</a>    | a disintegrin-like and metallo | <a href="#">Adamts3</a>            | 1.917 | 6.453  | 0.000308065 | 0.00580546  |
| 490 | 10502748 | <a href="#">NM_001081298</a>       | <a href="#">99633</a>     | latrophilin 2                  | <a href="#">Lphn2</a>              | 1.917 | 10.723 | 1.08752e-05 | 0.000636968 |
| 491 | 10433428 |                                    |                           |                                |                                    | 1.917 | 7.034  | 0.000178577 | 0.00410086  |
| 492 | 10462442 | <a href="#">NM_133775</a>          | <a href="#">77125</a>     | interleukin 33                 | <a href="#">Il33</a>               | 1.913 | 3.322  | 0.0121956   | 0.0776701   |
| 493 | 10367945 | <a href="#">NM_001033257</a>       | <a href="#">215789</a>    | phosphatase and actin regulato | <a href="#">Phactr2</a>            | 1.912 | 12.99  | 2.89903e-06 | 0.000261954 |
| 494 | 10564237 | <a href="#">ENSMUST00000054860</a> | <a href="#">330552</a>    | predicted gene, EG330552       | <a href="#">EG330552</a>           | 1.912 | 6.868  | 0.000207855 | 0.00454016  |
| 495 | 10436658 | <a href="#">AK148667</a>           | <a href="#">100038676</a> | predicted gene, ENSMUSG0000007 | <a href="#">ENSMUSG00000074937</a> | 1.91  | 3.753  | 0.0067615   | 0.051242    |
| 496 | 10351455 | <a href="#">NM_009063</a>          | <a href="#">19737</a>     | regulator of G-protein signali | <a href="#">Rgs5</a>               | 1.906 | 4.131  | 0.00412184  | 0.0357035   |
| 497 | 10502774 | <a href="#">NM_001081298</a>       | <a href="#">99633</a>     | latrophilin 2                  | <a href="#">Lphn2</a>              | 1.906 | 9.476  | 2.51502e-05 | 0.00108971  |
| 498 | 10566358 | <a href="#">NM_009099</a>          | <a href="#">20128</a>     | tripartite motif-containing 30 | <a href="#">Trim30</a>             | 1.903 | 11.494 | 6.7564e-06  | 0.000470224 |
| 499 | 10419223 | <a href="#">NM_146054</a>          | <a href="#">218952</a>    | fermitin family homolog 2 (Dro | <a href="#">Fermt2</a>             | 1.9   | 6.655  | 0.000253829 | 0.00515463  |
| 500 | 10536220 | <a href="#">NM_007743</a>          | <a href="#">12843</a>     | collagen, type I, alpha 2      | <a href="#">Col1a2</a>             | 1.897 | 7.448  | 0.000123609 | 0.00318334  |
| 501 | 10537296 |                                    |                           |                                |                                    | 1.897 | 2.722  | 0.0288242   | 0.139559    |
| 502 | 10441902 | <a href="#">NM_022315</a>          | <a href="#">64074</a>     | SPARC related modular calcium  | <a href="#">Smoc2</a>              | 1.896 | 4.744  | 0.00193435  | 0.0210607   |
| 503 | 10377534 | <a href="#">ENSMUST00000052108</a> | <a href="#">80515</a>     | RIKEN cDNA A030009H04 gene     | <a href="#">A030009H04Rik</a>      | 1.896 | 9.81   | 1.99097e-05 | 0.000941769 |
| 504 | 10559179 | <a href="#">AK054458</a>           | <a href="#">100038419</a> | predicted gene, ENSMUSG0000007 | <a href="#">ENSMUSG00000073783</a> | 1.894 | 4.838  | 0.00173     | 0.0193234   |
| 505 | 10450484 | <a href="#">NM_019467</a>          | <a href="#">11629</a>     | allograft inflammatory factor  | <a href="#">Aif1</a>               | 1.893 | 8.026  | 7.59259e-05 | 0.00229892  |
| 506 | 10496519 | <a href="#">NM_009472</a>          | <a href="#">22253</a>     | unc-5 homolog C (C. elegans)   | <a href="#">Unc5c</a>              | 1.89  | 4.027  | 0.00471563  | 0.039535    |
| 507 | 10535807 | <a href="#">NM_010228</a>          | <a href="#">14254</a>     | FMS-like tyrosine kinase 1     | <a href="#">Flt1</a>               | 1.89  | 7.59   | 0.000109343 | 0.00296023  |
| 508 | 10421774 | <a href="#">NM_001081336</a>       | <a href="#">380921</a>    | diacylglycerol kinase, eta     | <a href="#">Dgkh</a>               | 1.889 | 5.835  | 0.000573421 | 0.00892814  |
| 509 | 10583203 | <a href="#">BC107288</a>           | <a href="#">18689</a>     | per-hexamer repeat gene 4      | <a href="#">Phxr4</a>              | 1.887 | 3.588  | 0.00844675  | 0.0602131   |

|     |          |                                    |                           |                                |                                    |       |        |             |             |
|-----|----------|------------------------------------|---------------------------|--------------------------------|------------------------------------|-------|--------|-------------|-------------|
| 510 | 10590844 | <a href="#">ENSMUST00000093893</a> | <a href="#">71544</a>     | RIKEN cDNA 9030420J04 gene     | <a href="#">9030420J04Rik</a>      | 1.887 | 8.242  | 6.37491e-05 | 0.0020557   |
| 511 | 10351463 | <a href="#">ENSMUST00000027997</a> | <a href="#">19737</a>     | regulator of G-protein signali | <a href="#">Rgs5</a>               | 1.887 | 3.607  | 0.00822797  | 0.0590738   |
| 512 | 10344837 | <a href="#">NM_029525</a>          | <a href="#">109294</a>    | DEP domain containing 2        | <a href="#">Depdc2</a>             | 1.883 | 7.27   | 0.000144472 | 0.00351926  |
| 513 | 10363157 | <a href="#">NM_023129</a>          | <a href="#">18821</a>     | phospholamban                  | <a href="#">Pln</a>                | 1.882 | 5.333  | 0.000984174 | 0.0129492   |
| 514 | 10358539 | <a href="#">NM_001024720</a>       | <a href="#">545370</a>    | hemimentin 1                   | <a href="#">Hmen1</a>              | 1.881 | 5.099  | 0.00127939  | 0.0157367   |
| 515 | 10568553 | <a href="#">NM_029935</a>          | <a href="#">77590</a>     | RIKEN cDNA 4631426J05 gene     | <a href="#">4631426J05Rik</a>      | 1.881 | 6.688  | 0.000245984 | 0.0050424   |
| 516 | 10588819 | <a href="#">NM_001122635</a>       | <a href="#">69398</a>     | RIKEN cDNA 1700021K14 gene     | <a href="#">1700021K14Rik</a>      | 1.877 | 4.006  | 0.00484695  | 0.0403004   |
| 517 | 10355893 | <a href="#">NM_007936</a>          | <a href="#">13838</a>     | Eph receptor A4                | <a href="#">Epha4</a>              | 1.877 | 7.51   | 0.000117102 | 0.00309113  |
| 518 | 10601360 | <a href="#">NM_001109757</a>       | <a href="#">11977</a>     | ATPase, Cu++ transporting, alp | <a href="#">Atp7a</a>              | 1.877 | 9.083  | 3.34414e-05 | 0.00132661  |
| 519 | 10441093 | <a href="#">NM_133659</a>          | <a href="#">13876</a>     | avian erythroblastosis virus E | <a href="#">Erg</a>                | 1.876 | 6.701  | 0.000243129 | 0.00502386  |
| 520 | 10494271 | <a href="#">NM_021281</a>          | <a href="#">13040</a>     | cathepsin S                    | <a href="#">Ctss</a>               | 1.875 | 7.672  | 0.000101977 | 0.00281122  |
| 521 | 10554655 | <a href="#">ENSMUST00000082237</a> | <a href="#">108797</a>    | mex3 homolog B (C. elegans)    | <a href="#">Mex3b</a>              | 1.874 | 7.632  | 0.000105503 | 0.00288585  |
| 522 | 10384458 | <a href="#">NM_019549</a>          | <a href="#">56193</a>     | pleckstrin                     | <a href="#">Plek</a>               | 1.871 | 7.095  | 0.000168912 | 0.00394638  |
| 523 | 10605370 | <a href="#">NM_008621</a>          | <a href="#">17524</a>     | membrane protein, palmitoylate | <a href="#">Mpp1</a>               | 1.87  | 7.279  | 0.000143364 | 0.00349631  |
| 524 | 10436945 | <a href="#">NM_017391</a>          | <a href="#">53881</a>     | solute carrier family 5 (inosi | <a href="#">Slc5a3</a>             | 1.87  | 8.425  | 5.51548e-05 | 0.0018689   |
| 525 | 10468668 | <a href="#">NM_146102</a>          | <a href="#">226250</a>    | actin filament associated prot | <a href="#">Afap112</a>            | 1.869 | 7.251  | 0.000146895 | 0.00355371  |
| 526 | 10373223 | <a href="#">NM_008512</a>          | <a href="#">16971</a>     | low density lipoprotein recept | <a href="#">Lrp1</a>               | 1.869 | 6.705  | 0.000242049 | 0.00501753  |
| 527 | 10435961 | <a href="#">ENSMUST00000099728</a> | <a href="#">100038470</a> | predicted gene, ENSMUSG0000007 | <a href="#">ENSMUSG00000075047</a> | 1.869 | 6.315  | 0.000352543 | 0.00632617  |
| 528 | 10603583 | <a href="#">NM_016911</a>          | <a href="#">51795</a>     | sushi-repeat-containing protei | <a href="#">SrpX</a>               | 1.868 | 6.378  | 0.000331386 | 0.00606651  |
| 529 | 10405063 | <a href="#">NM_008760</a>          | <a href="#">18295</a>     | osteoglycin                    | <a href="#">Ogn</a>                | 1.862 | 1.575  | 0.158087    | 0.405065    |
| 530 | 10572960 | <a href="#">XM_001472504</a>       | <a href="#">100039235</a> | hypothetical protein LOC100039 | <a href="#">LOC100039235</a>       | 1.862 | 6.979  | 0.000187759 | 0.00422741  |
| 531 | 10451763 | <a href="#">NM_009122</a>          | <a href="#">20230</a>     | special AT-rich sequence bindi | <a href="#">Satb1</a>              | 1.861 | 9.567  | 2.3586e-05  | 0.0010455   |
| 532 | 10492428 | <a href="#">NM_178892</a>          | <a href="#">99929</a>     | TCDD-inducible poly(ADP-ribose | <a href="#">Tiparp</a>             | 1.859 | 5.719  | 0.000647669 | 0.0097054   |
| 533 | 10367118 |                                    |                           |                                |                                    | 1.858 | 2.28   | 0.0555388   | 0.215154    |
| 534 | 10504424 | <a href="#">NM_016678</a>          | <a href="#">53614</a>     | reversion-inducing-cysteine-ri | <a href="#">Reck</a>               | 1.857 | 10.512 | 1.24498e-05 | 0.000695317 |
| 535 | 10548038 | <a href="#">NM_008742</a>          | <a href="#">18205</a>     | neurotrophin 3                 | <a href="#">Ntf3</a>               | 1.856 | 3.859  | 0.00587086  | 0.0462693   |
| 536 | 10354309 | <a href="#">NM_007737</a>          | <a href="#">12832</a>     | collagen, type V, alpha 2      | <a href="#">Col5a2</a>             | 1.855 | 7.945  | 8.11319e-05 | 0.00240259  |
| 537 | 10495967 | <a href="#">NM_145133</a>          | <a href="#">211550</a>    | TRAF-interacting protein with  | <a href="#">Tifa</a>               | 1.855 | 6.435  | 0.000313638 | 0.00586864  |
| 538 | 10571142 | <a href="#">NM_054044</a>          | <a href="#">78560</a>     | G protein-coupled receptor 124 | <a href="#">Gpr124</a>             | 1.854 | 11.524 | 6.63573e-06 | 0.000464589 |
| 539 | 10514668 | <a href="#">NM_146145</a>          | <a href="#">16451</a>     | Janus kinase 1                 | <a href="#">Jak1</a>               | 1.85  | 8.405  | 5.60116e-05 | 0.00187095  |
| 540 | 10461369 | <a href="#">NM_009643</a>          | <a href="#">66395</a>     | AHNAK nucleoprotein (desmoyoki | <a href="#">Ahnak</a>              | 1.849 | 7.532  | 0.00011491  | 0.00304918  |
| 541 | 10590860 | <a href="#">ENSMUST00000034333</a> | <a href="#">71544</a>     | RIKEN cDNA 9030420J04 gene     | <a href="#">9030420J04Rik</a>      | 1.845 | 4.3    | 0.00332881  | 0.0307221   |
| 542 | 10358601 | <a href="#">NM_001024720</a>       | <a href="#">545370</a>    | hemimentin 1                   | <a href="#">Hmen1</a>              | 1.845 | 3.15   | 0.0155313   | 0.0925314   |
| 543 | 10345212 | <a href="#">NM_133235</a>          | <a href="#">170771</a>    | KH domain containing, RNA bind | <a href="#">Khdrbs2</a>            | 1.845 | 4.746  | 0.00192987  | 0.0210292   |
| 544 | 10425852 | <a href="#">NM_133167</a>          | <a href="#">170736</a>    | parvin, beta                   | <a href="#">Parvb</a>              | 1.843 | 7.346  | 0.000135089 | 0.00336488  |
| 545 | 10531191 | <a href="#">NM_001081401</a>       | <a href="#">330119</a>    | a disintegrin-like and metallo | <a href="#">Adamts3</a>            | 1.842 | 7.911  | 8.34702e-05 | 0.00245807  |
| 546 | 10473244 | <a href="#">NM_175513</a>          | <a href="#">241514</a>    | zinc finger protein 804A       | <a href="#">Zfp804a</a>            | 1.842 | 4.267  | 0.00346982  | 0.031596    |
| 547 | 10352152 | <a href="#">NM_177757</a>          | <a href="#">269152</a>    | kinesin family member 26B      | <a href="#">Kif26b</a>             | 1.839 | 10.954 | 9.39637e-06 | 0.000586067 |
| 548 | 10459353 |                                    |                           |                                |                                    | 1.839 | 8.813  | 4.08971e-05 | 0.00151707  |
| 549 | 10536494 | <a href="#">NM_016900</a>          | <a href="#">12390</a>     | caveolin 2                     | <a href="#">Cav2</a>               | 1.838 | 8.156  | 6.83486e-05 | 0.00213151  |
| 550 | 10439895 | <a href="#">NM_009655</a>          | <a href="#">11658</a>     | activated leukocyte cell adhes | <a href="#">Alcam</a>              | 1.838 | 3.998  | 0.00489535  | 0.0406389   |
| 551 | 10416175 | <a href="#">NM_010910</a>          | <a href="#">18039</a>     | neurofilament, light polypepti | <a href="#">Nefl</a>               | 1.837 | 3.642  | 0.00785011  | 0.0572157   |
| 552 | 10372028 | <a href="#">NM_018797</a>          | <a href="#">54712</a>     | plexin C1                      | <a href="#">Plxnc1</a>             | 1.835 | 3.633  | 0.0079504   | 0.057744    |
| 553 | 10408861 | <a href="#">BC027755</a>           | <a href="#">109254</a>    | RIKEN cDNA 9530008L14 gene     | <a href="#">9530008L14Rik</a>      | 1.834 | 5.466  | 0.000849889 | 0.0116764   |
| 554 | 10483023 | <a href="#">AK169352</a>           | <a href="#">56878</a>     | RNA binding motif, single stra | <a href="#">Rbms1</a>              | 1.833 | 7.306  | 0.000139942 | 0.00344063  |
| 555 | 10475890 | <a href="#">NM_008587</a>          | <a href="#">17289</a>     | c-mer proto-oncogene tyrosine  | <a href="#">Mertk</a>              | 1.832 | 4.601  | 0.00229737  | 0.0240288   |
| 556 | 10508663 | <a href="#">NM_010686</a>          | <a href="#">16792</a>     | lysosomal-associated protein t | <a href="#">Laptm5</a>             | 1.832 | 9.78   | 2.03305e-05 | 0.000959525 |
| 557 | 10391444 | <a href="#">NM_026865</a>          | <a href="#">73635</a>     | RIKEN cDNA 1700113I22 gene     | <a href="#">1700113I22Rik</a>      | 1.831 | 2.75   | 0.0276732   | 0.13614     |
| 558 | 10607865 | <a href="#">NM_021278</a>          | <a href="#">19241</a>     | thymosin, beta 4, X chromosome | <a href="#">Tmsb4x</a>             | 1.83  | 9.422  | 2.61404e-05 | 0.0011234   |
| 559 | 10440513 | <a href="#">NM_144853</a>          | <a href="#">224405</a>    | cysteine and tyrosine-rich pro | <a href="#">Cyyr1</a>              | 1.829 | 6.822  | 0.000216996 | 0.00467702  |
| 560 | 10376950 | <a href="#">NM_008885</a>          | <a href="#">18858</a>     | peripheral myelin protein      | <a href="#">Pmp22</a>              | 1.827 | 3.539  | 0.00903376  | 0.0631438   |
| 561 | 10399470 | <a href="#">NM_144551</a>          | <a href="#">217410</a>    | tribbles homolog 2 (Drosophila | <a href="#">Trib2</a>              | 1.823 | 6.365  | 0.000335849 | 0.00611645  |
| 562 | 10307075 | <a href="#">BC128276</a>           | <a href="#">52668</a>     | DNA segment, Chr 12, ERATO     | <a href="#">D12Erat4647a</a>       | 1.822 | 6.651  | 0.000254705 | 0.00515851  |

|     |          |                                    |                           |                                |                                    |       |        |             |             |
|-----|----------|------------------------------------|---------------------------|--------------------------------|------------------------------------|-------|--------|-------------|-------------|
| 562 | 10577713 | <a href="#">BC126270</a>           | <a href="#">52000</a>     | Doi                            | <a href="#">D12110047c</a>         | 1.822 | 0.051  | 0.000294703 | 0.00118631  |
| 563 | 10544751 | <a href="#">NM_010451</a>          | <a href="#">15399</a>     | homeo box A2                   | <a href="#">Hoxa2</a>              | 1.821 | 4.411  | 0.00289784  | 0.0281591   |
| 564 | 10577641 | <a href="#">NM_026931</a>          | <a href="#">69068</a>     | RIKEN cDNA 1810011O10 gene     | <a href="#">1810011O10Rik</a>      | 1.819 | 5.476  | 0.000840398 | 0.0115837   |
| 565 | 10354111 | <a href="#">NM_010678</a>          | <a href="#">16764</a>     | AF4/FMR2 family, member 3      | <a href="#">Aff3</a>               | 1.817 | 12.827 | 3.16411e-06 | 0.000279924 |
| 566 | 10354741 | <a href="#">NM_028713</a>          | <a href="#">74013</a>     | raftlin family member 2        | <a href="#">Rftn2</a>              | 1.815 | 6.309  | 0.000354609 | 0.00634586  |
| 567 | 10605503 |                                    |                           |                                |                                    | 1.813 | 2.51   | 0.0394274   | 0.172278    |
| 568 | 10568392 | <a href="#">NM_026418</a>          | <a href="#">67865</a>     | regulator of G-protein signal1 | <a href="#">Rgs10</a>              | 1.813 | 6.76   | 0.000229978 | 0.00483366  |
| 569 | 10362113 | <a href="#">ENSMUST00000100029</a> | <a href="#">100038582</a> | predicted gene, ENSMUSG0000007 | <a href="#">ENSMUSG00000075292</a> | 1.813 | 6.347  | 0.000341764 | 0.00618755  |
| 570 | 10431051 | <a href="#">NM_022723</a>          | <a href="#">64706</a>     | signal peptide, CUB domain, EG | <a href="#">Scube1</a>             | 1.812 | 10.181 | 1.54824e-05 | 0.000800389 |
| 571 | 10484389 | <a href="#">NM_011576</a>          | <a href="#">21788</a>     | tissue factor pathway inhibito | <a href="#">Tfpi</a>               | 1.808 | 6.59   | 0.000269915 | 0.00533798  |
| 572 | 10428707 | <a href="#">NM_008216</a>          | <a href="#">15117</a>     | hyaluronan synthase 2          | <a href="#">Has2</a>               | 1.808 | 5.488  | 0.00083031  | 0.0115242   |
| 573 | 10607225 | <a href="#">NM_001081173</a>       | <a href="#">210297</a>    | leucine-rich repeats and calpo | <a href="#">Lrch2</a>              | 1.807 | 7.466  | 0.000121663 | 0.00314865  |
| 574 | 10523128 | <a href="#">NM_023785</a>          | <a href="#">57349</a>     | pro-platelet basic protein     | <a href="#">Ppbp</a>               | 1.806 | 3.131  | 0.0159505   | 0.0942326   |
| 575 | 10554574 | <a href="#">NM_145375</a>          | <a href="#">107769</a>    | transmembrane 6 superfamily me | <a href="#">Tm6sf1</a>             | 1.805 | 9.384  | 2.68734e-05 | 0.0011479   |
| 576 | 10599530 | <a href="#">NM_011228</a>          | <a href="#">19337</a>     | RAB33A, member of RAS oncogene | <a href="#">Rab33a</a>             | 1.802 | 4.735  | 0.00195555  | 0.0212259   |
| 577 | 10467840 | <a href="#">AK081501</a>           | <a href="#">100038488</a> | predicted gene, ENSMUSG0000007 | <a href="#">ENSMUSG00000071549</a> | 1.801 | 1.45   | 0.189146    | 0.44755     |
| 578 | 10513101 |                                    |                           |                                |                                    | 1.799 | 1.902  | 0.0976359   | 0.304531    |
| 579 | 10483025 | <a href="#">NM_020296</a>          | <a href="#">56878</a>     | RNA binding motif, single stra | <a href="#">Rbms1</a>              | 1.799 | 8.925  | 3.76029e-05 | 0.00142276  |
| 580 | 10413398 | <a href="#">NM_134437</a>          | <a href="#">171463</a>    | interleukin 17 receptor D      | <a href="#">Il17rd</a>             | 1.798 | 8.831  | 4.03467e-05 | 0.0015016   |
| 581 | 10358543 | <a href="#">NM_001024720</a>       | <a href="#">545370</a>    | hemicentin 1                   | <a href="#">Hmcn1</a>              | 1.798 | 3.438  | 0.0103791   | 0.0698014   |
| 582 | 10527233 | <a href="#">NM_011182</a>          | <a href="#">19159</a>     | pleckstrin homology, Sec7 and  | <a href="#">Pscd3</a>              | 1.797 | 4.739  | 0.00194534  | 0.0211368   |
| 583 | 10482920 | <a href="#">NM_025422</a>          | <a href="#">66205</a>     | CD302 antigen                  | <a href="#">Cd302</a>              | 1.797 | 5.951  | 0.00050864  | 0.00819592  |
| 584 | 10530421 | <a href="#">NM_010251</a>          | <a href="#">14397</a>     | gamma-aminobutyric acid (GABA- | <a href="#">Gabra4</a>             | 1.796 | 7.503  | 0.000117815 | 0.00309835  |
| 585 | 10498885 | <a href="#">NM_013540</a>          | <a href="#">14800</a>     | glutamate receptor, ionotropic | <a href="#">Gria2</a>              | 1.795 | 6.973  | 0.000188744 | 0.00422741  |
| 586 | 10406452 | <a href="#">AY344585</a>           | <a href="#">100126879</a> | predicted gene, ENSMUSG0000007 | <a href="#">ENSMUSG00000074792</a> | 1.793 | 3.886  | 0.00567016  | 0.0452244   |
| 587 | 10518835 | <a href="#">NM_001081557</a>       | <a href="#">100072</a>    | calmodulin binding transcripti | <a href="#">Camta1</a>             | 1.792 | 2.734  | 0.0283286   | 0.138077    |
| 588 | 10422164 | <a href="#">NM_007904</a>          | <a href="#">13618</a>     | endothelin receptor type B     | <a href="#">Ednrb</a>              | 1.791 | 3.241  | 0.0136601   | 0.0843789   |
| 589 | 10586118 | <a href="#">NM_138304</a>          | <a href="#">75600</a>     | calmodulin-like 4              | <a href="#">Calml4</a>             | 1.791 | 2.994  | 0.0194112   | 0.107499    |
| 590 | 10462957 | <a href="#">NM_145952</a>          | <a href="#">209478</a>    | TBC1D12: TBC1 domain family, m | <a href="#">Tbc1d12</a>            | 1.79  | 4.74   | 0.00194468  | 0.0211368   |
| 591 | 10377319 | <a href="#">NM_175260</a>          | <a href="#">77579</a>     | myosin, heavy polypeptide 10,  | <a href="#">Myh10</a>              | 1.788 | 12.375 | 4.05842e-06 | 0.000328779 |
| 592 | 10385036 | <a href="#">NM_008005</a>          | <a href="#">14172</a>     | fibroblast growth factor 18    | <a href="#">Fgf18</a>              | 1.784 | 7.349  | 0.00013473  | 0.00336488  |
| 593 | 10505132 | <a href="#">NM_001035533</a>       | <a href="#">11641</a>     | A kinase (PRKA) anchor protein | <a href="#">Akap2</a>              | 1.784 | 2.815  | 0.0251561   | 0.127922    |
| 594 | 10538842 | <a href="#">NM_025278</a>          | <a href="#">14701</a>     | guanine nucleotide binding pro | <a href="#">Gng12</a>              | 1.782 | 12.718 | 3.35709e-06 | 0.000292108 |
| 595 | 10380660 | <a href="#">NM_134032</a>          | <a href="#">103889</a>    | homeo box B2                   | <a href="#">Hoxb2</a>              | 1.78  | 6.063  | 0.000453863 | 0.00756735  |
| 596 | 10486041 | <a href="#">NM_010825</a>          | <a href="#">17536</a>     | Meis homeobox 2                | <a href="#">Meis2</a>              | 1.779 | 7.532  | 0.000114936 | 0.00304918  |
| 597 | 10566543 | <a href="#">ENSMUST00000078482</a> | <a href="#">233651</a>    | dachsous 1 (Drosophila)        | <a href="#">Dchs1</a>              | 1.778 | 9.287  | 2.87998e-05 | 0.00120006  |
| 598 | 10578241 | <a href="#">NM_178735</a>          | <a href="#">244425</a>    | RIKEN cDNA A730069N07 gene     | <a href="#">A730069N07Rik</a>      | 1.777 | 5.73   | 0.000640675 | 0.00963473  |
| 599 | 10422608 | <a href="#">NM_024188</a>          | <a href="#">67041</a>     | 3-oxoacid CoA transferase 1    | <a href="#">Oxct1</a>              | 1.775 | 11.586 | 6.39403e-06 | 0.000453676 |
| 600 | 10357137 | <a href="#">NM_001081125</a>       | <a href="#">14633</a>     | GLI-Kruppel family member GLI2 | <a href="#">Gli2</a>               | 1.774 | 7.519  | 0.000116195 | 0.00307489  |
| 601 | 10401238 | <a href="#">NM_007564</a>          | <a href="#">12192</a>     | zinc finger protein 36, C3H ty | <a href="#">Zfp3611</a>            | 1.773 | 5.521  | 0.000801057 | 0.0112318   |
| 602 | 10562192 | <a href="#">NM_008761</a>          | <a href="#">18301</a>     | FXYD domain-containing ion tra | <a href="#">Fxyd5</a>              | 1.773 | 7.472  | 0.000121038 | 0.00314805  |
| 603 | 10423287 | <a href="#">NM_001081299</a>       | <a href="#">320865</a>    | cadherin 18                    | <a href="#">Cdh18</a>              | 1.772 | 3.083  | 0.0170844   | 0.0986976   |
| 604 | 10459071 | <a href="#">NM_134133</a>          | <a href="#">106878</a>    | RIKEN cDNA 2010002N04 gene     | <a href="#">2010002N04Rik</a>      | 1.771 | 8.591  | 4.84807e-05 | 0.00170608  |
| 605 | 10358339 | <a href="#">NM_009888</a>          | <a href="#">12628</a>     | complement component factor h  | <a href="#">Cfh</a>                | 1.771 | 5.732  | 0.000638779 | 0.00962676  |
| 606 | 10461721 | <a href="#">NM_010821</a>          | <a href="#">17476</a>     | macrophage expressed gene 1    | <a href="#">Mpeg1</a>              | 1.77  | 9.434  | 2.59194e-05 | 0.00111845  |
| 607 | 10467826 | <a href="#">NM_001081257</a>       | <a href="#">545291</a>    | similar to Heparanase-2 (Hpa2) | <a href="#">LOC545291</a>          | 1.77  | 1.693  | 0.132977    | 0.366629    |
| 608 | 10578649 | <a href="#">NM_011857</a>          | <a href="#">23965</a>     | odd Oz/ten-m homolog 3 (Drosop | <a href="#">Odz3</a>               | 1.768 | 5.885  | 0.00054477  | 0.00859115  |
| 609 | 10572130 | <a href="#">NM_008509</a>          | <a href="#">16956</a>     | lipoprotein lipase             | <a href="#">Lpl</a>                | 1.766 | 9.186  | 3.10028e-05 | 0.00126305  |

RIKEN cDNA A030580M24

|     |          |                                    |                           |                                 |                                    |       |        |             |             |
|-----|----------|------------------------------------|---------------------------|---------------------------------|------------------------------------|-------|--------|-------------|-------------|
| 610 | 10369132 | <a href="#">NM_001081428</a>       | <a href="#">75906</a>     | RIKEN cDNA 4930589M24 gene      | <a href="#">4930589M24Rik</a>      | 1.765 | 8.18   | 6.70208e-05 | 0.00210563  |
| 611 | 10421948 |                                    |                           |                                 |                                    | 1.764 | 3.843  | 0.00599458  | 0.0469175   |
| 612 | 10544732 | <a href="#">NM_018773</a>          | <a href="#">54353</a>     | src family associated phosphop  | <a href="#">Skap2</a>              | 1.764 | 8.166  | 6.77726e-05 | 0.00211667  |
| 613 | 10436304 | <a href="#">NM_001014423</a>       | <a href="#">320712</a>    | ABI gene family, member 3 (NES) | <a href="#">Abi3bp</a>             | 1.764 | 2.399  | 0.0465044   | 0.191643    |
| 614 | 10407211 | <a href="#">NM_008247</a>          | <a href="#">19012</a>     | phosphatidic acid phosphatase   | <a href="#">Ppap2a</a>             | 1.763 | 3.196  | 0.014558    | 0.0884268   |
| 615 | 10574471 | <a href="#">NM_024217</a>          | <a href="#">68119</a>     | CKLF-like MARVEL transmembrane  | <a href="#">Cmtm3</a>              | 1.762 | 8.969  | 3.63711e-05 | 0.0013957   |
| 616 | 10353102 | <a href="#">NM_177834</a>          | <a href="#">329093</a>    | carboxypeptidase A6             | <a href="#">Cpa6</a>               | 1.761 | 4.238  | 0.00359804  | 0.0324929   |
| 617 | 10569714 | <a href="#">NM_133189</a>          | <a href="#">81904</a>     | calcium channel, voltage-depen  | <a href="#">Cacng7</a>             | 1.76  | 6.273  | 0.000367457 | 0.00650713  |
| 618 | 10375402 | <a href="#">NM_009616</a>          | <a href="#">11492</a>     | a disintegrin and metalloprotei | <a href="#">Adam19</a>             | 1.759 | 4.441  | 0.00279119  | 0.0274753   |
| 619 | 10420413 | <a href="#">NM_015771</a>          | <a href="#">50523</a>     | large tumor suppressor 2        | <a href="#">Lats2</a>              | 1.757 | 8.853  | 3.96731e-05 | 0.00147945  |
| 620 | 10578222 | <a href="#">NM_015802</a>          | <a href="#">50768</a>     | deleted in liver cancer 1       | <a href="#">Dlc1</a>               | 1.755 | 4.9    | 0.00160998  | 0.0183611   |
| 621 | 10542594 | <a href="#">AY512955</a>           | <a href="#">100093699</a> | predicted gene, ENSMUSG0000006  | <a href="#">ENSMUSG00000067389</a> | 1.754 | 2.149  | 0.067558    | 0.242768    |
| 622 | 10455054 | <a href="#">NM_053128</a>          | <a href="#">93874</a>     | protocadherin beta 3            | <a href="#">Pcdhb3</a>             | 1.749 | 5.016  | 0.00140651  | 0.0166794   |
| 623 | 10369615 | <a href="#">NM_011157</a>          | <a href="#">19073</a>     | serglycin                       | <a href="#">Srgn</a>               | 1.747 | 4.999  | 0.00143416  | 0.0168502   |
| 624 | 10387316 | <a href="#">NM_146019</a>          | <a href="#">216848</a>    | chromodomain helicase DNA bind  | <a href="#">Chd3</a>               | 1.742 | 6.416  | 0.000319303 | 0.00592742  |
| 625 | 10537146 | <a href="#">NM_008012</a>          | <a href="#">14187</a>     | aldo-keto reductase family 1,   | <a href="#">Akr1b8</a>             | 1.741 | 6.246  | 0.000377415 | 0.00663347  |
| 626 | 10365749 | <a href="#">NM_008517</a>          | <a href="#">16993</a>     | leukotriene A4 hydrolase        | <a href="#">Lta4h</a>              | 1.741 | 7.398  | 0.000129124 | 0.0032815   |
| 627 | 10447946 | <a href="#">BC089489</a>           | <a href="#">74917</a>     | RIKEN cDNA 4930474M22 gene      | <a href="#">4930474M22Rik</a>      | 1.74  | 5.1    | 0.00127785  | 0.015736    |
| 628 | 10459643 | <a href="#">BC057927</a>           | <a href="#">269033</a>    | RIKEN cDNA 4930503L19 gene      | <a href="#">4930503L19Rik</a>      | 1.737 | 10.693 | 1.1085e-05  | 0.000643904 |
| 629 | 10538354 | <a href="#">AK039090</a>           | <a href="#">100049166</a> | hypothetical protein LOC100049  | <a href="#">LOC100049166</a>       | 1.737 | 5.148  | 0.00121033  | 0.0150891   |
| 630 | 10564624 | <a href="#">NM_009181</a>          | <a href="#">20450</a>     | ST8 alpha-N-acetyl-neuraminide  | <a href="#">St8sia2</a>            | 1.736 | 5.716  | 0.000650115 | 0.00973514  |
| 631 | 10443949 | <a href="#">NM_172619</a>          | <a href="#">224697</a>    | a disintegrin-like and metallo  | <a href="#">Adamts10</a>           | 1.735 | 9.67   | 2.19382e-05 | 0.00100524  |
| 632 | 10590487 | <a href="#">XR_031805</a>          | <a href="#">623911</a>    | zinc finger protein 660         | <a href="#">Zfp660</a>             | 1.734 | 6.989  | 0.000186103 | 0.00421753  |
| 633 | 10523281 | <a href="#">NM_001009818</a>       | <a href="#">52398</a>     | septin 11                       | <a href="#">Sept11</a>             | 1.734 | 11.617 | 6.27763e-06 | 0.000448427 |
| 634 | 10358389 | <a href="#">NM_009061</a>          | <a href="#">19735</a>     | regulator of G-protein signali  | <a href="#">Rgs2</a>               | 1.731 | 6.361  | 0.000336973 | 0.00613164  |
| 635 | 10412298 | <a href="#">NM_001033228</a>       | <a href="#">109700</a>    | integrin alpha 1                | <a href="#">Itga1</a>              | 1.731 | 2.903  | 0.0221419   | 0.117189    |
| 636 | 10497862 | <a href="#">NM_019510</a>          | <a href="#">22065</a>     | transient receptor potential c  | <a href="#">Trpc3</a>              | 1.731 | 10.36  | 1.3757e-05  | 0.000740146 |
| 637 | 10389929 | <a href="#">NM_009783</a>          | <a href="#">12291</a>     | calcium channel, voltage-depen  | <a href="#">Cacna1g</a>            | 1.73  | 4.976  | 0.00147435  | 0.0171413   |
| 638 | 10530100 | <a href="#">ENSMUST00000076623</a> | <a href="#">212285</a>    | centaurin, delta 1              | <a href="#">Centd1</a>             | 1.73  | 2.797  | 0.0258458   | 0.130239    |
| 639 | 10578521 | <a href="#">NM_207213</a>          | <a href="#">102141</a>    | sorting nexin 25                | <a href="#">Snx25</a>              | 1.728 | 6.245  | 0.000378059 | 0.00663376  |
| 640 | 10350848 | <a href="#">BC055845</a>           | <a href="#">69953</a>     | RIKEN cDNA 2810025M15 gene      | <a href="#">2810025M15Rik</a>      | 1.728 | 6.168  | 0.000408233 | 0.00704626  |
| 641 | 10495869 | <a href="#">NM_146140</a>          | <a href="#">229801</a>    | translocation associated membr  | <a href="#">Tram111</a>            | 1.726 | 8.571  | 4.92301e-05 | 0.00172338  |
| 642 | 10436550 |                                    |                           |                                 |                                    | 1.726 | 4.937  | 0.00154196  | 0.0177547   |
| 643 | 10435305 | <a href="#">NM_010580</a>          | <a href="#">16419</a>     | integrin beta 5                 | <a href="#">Itgb5</a>              | 1.723 | 6.796  | 0.000222376 | 0.00473031  |
| 644 | 10529656 | <a href="#">NM_010942</a>          | <a href="#">18196</a>     | neuron specific gene family me  | <a href="#">Nsg1</a>               | 1.722 | 7.821  | 8.99834e-05 | 0.00260646  |
| 645 | 10490856 | <a href="#">NM_178631</a>          | <a href="#">76897</a>     | RALY RNA binding protein-like   | <a href="#">Raly1</a>              | 1.719 | 3.75   | 0.00678643  | 0.0513389   |
| 646 | 10393559 | <a href="#">NM_011594</a>          | <a href="#">21858</a>     | tissue inhibitor of metallopro  | <a href="#">Timp2</a>              | 1.718 | 4.946  | 0.00152529  | 0.0176188   |
| 647 | 10570982 | <a href="#">NM_010206</a>          | <a href="#">14182</a>     | fibroblast growth factor recep  | <a href="#">Egfr1</a>              | 1.718 | 9.479  | 2.51077e-05 | 0.00108971  |
| 648 | 10413482 | <a href="#">NM_009524</a>          | <a href="#">22418</a>     | wingless-related MMTV integrat  | <a href="#">Wnt5a</a>              | 1.717 | 2.553  | 0.0370138   | 0.16504     |
| 649 | 10606355 | <a href="#">NM_021476</a>          | <a href="#">58861</a>     | cysteinyl leukotriene receptor  | <a href="#">Cysl1r1</a>            | 1.716 | 9.002  | 3.54866e-05 | 0.00137423  |
| 650 | 10544837 | <a href="#">BC043099</a>           | <a href="#">66873</a>     | RIKEN cDNA 1200009O22 gene      | <a href="#">1200009O22Rik</a>      | 1.715 | 4.933  | 0.00154932  | 0.0178231   |
| 651 | 10367734 | <a href="#">NM_177387</a>          | <a href="#">338362</a>    | uronyl-2-sulfotransferase       | <a href="#">Ust</a>                | 1.713 | 5.316  | 0.00100275  | 0.0131609   |
| 652 | 10497817 | <a href="#">NM_009673</a>          | <a href="#">11747</a>     | annexin A5                      | <a href="#">Anxa5</a>              | 1.713 | 7.255  | 0.00014645  | 0.00354701  |
| 653 | 10447317 | <a href="#">NM_010137</a>          | <a href="#">13819</a>     | endothelial PAS domain protein  | <a href="#">Epas1</a>              | 1.713 | 9.731  | 2.10377e-05 | 0.00097978  |
| 654 | 10592251 | <a href="#">NM_001029838</a>       | <a href="#">208076</a>    | Pbx/knotted 1 homeobox 2        | <a href="#">Pknx2</a>              | 1.713 | 6.67   | 0.000250347 | 0.00510341  |
| 655 | 10369252 | <a href="#">NM_001024911</a>       | <a href="#">103080</a>    | septin 10                       | <a href="#">Sept10</a>             | 1.711 | 8.646  | 4.64484e-05 | 0.00165971  |
| 656 | 10592533 |                                    |                           |                                 |                                    | 1.711 | 6.653  | 0.000254269 | 0.00515463  |
| 657 | 10472958 | <a href="#">NM_013554</a>          | <a href="#">15430</a>     | homeo box D10                   | <a href="#">Hoxd10</a>             | 1.708 | 1.504  | 0.175057    | 0.428228    |
| 658 | 10547404 | <a href="#">NM_053204</a>          | <a href="#">111173</a>    | ELKS/RAB6-interacting/CAST fam  | <a href="#">Erc1</a>               | 1.708 | 6.692  | 0.000245085 | 0.00503604  |
| 659 | 10472240 | <a href="#">NM_198294</a>          | <a href="#">66860</a>     | tetratricopeptide repeat, anky  | <a href="#">Tanc1</a>              | 1.707 | 10.732 | 1.08117e-05 | 0.000636968 |

|     |          |                                    |                           |                                   |                                    |       |       |             |            |
|-----|----------|------------------------------------|---------------------------|-----------------------------------|------------------------------------|-------|-------|-------------|------------|
| 660 | 10601270 | <a href="#">ENSMUST00000101339</a> | <a href="#">100038406</a> | predicted gene,<br>ENSMUSG0000007 | <a href="#">ENSMUSG00000073037</a> | 1.704 | 2.976 | 0.0199333   | 0.109672   |
| 661 | 10412207 | <a href="#">BC019664</a>           | <a href="#">69590</a>     | RIKEN cDNA 2310016C16<br>gene     | <a href="#">2310016C16Rik</a>      | 1.702 | 8.328 | 5.95469e-05 | 0.0019581  |
| 662 | 10584259 | <a href="#">NM_183171</a>          | <a href="#">235180</a>    | fasciculation and elongation p    | <a href="#">Fez1</a>               | 1.702 | 4.697 | 0.00204667  | 0.022079   |
| 663 | 10513208 | <a href="#">NM_022814</a>          | <a href="#">64817</a>     | sushi, von Willebrand factor t    | <a href="#">Svep1</a>              | 1.701 | 5.894 | 0.000539531 | 0.0085452  |
| 664 | 10544383 | <a href="#">NM_032540</a>          | <a href="#">23925</a>     | Kell blood group                  | <a href="#">Kel</a>                | 1.701 | 1.693 | 0.132952    | 0.366605   |
| 665 | 10438769 | <a href="#">NM_016674</a>          | <a href="#">12737</a>     | claudin 1                         | <a href="#">Cldn1</a>              | 1.701 | 3.128 | 0.0160326   | 0.0945852  |
| 666 | 10353438 | <a href="#">NM_177409</a>          | <a href="#">170829</a>    | translocating chain-associatin    | <a href="#">Tram2</a>              | 1.701 | 7.433 | 0.000125208 | 0.00321287 |
| 667 | 10352143 | <a href="#">BC120791</a>           | <a href="#">240945</a>    | RIKEN cDNA D230039L06<br>gene     | <a href="#">D230039L06Rik</a>      | 1.7   | 5.087 | 0.00129657  | 0.0158374  |
| 668 | 10495685 | <a href="#">NM_172525</a>          | <a href="#">214137</a>    | Rho GTPase activating protein     | <a href="#">Arhgap29</a>           | 1.699 | 6.599 | 0.000267721 | 0.00532453 |
| 669 | 10582337 | <a href="#">BC039210</a>           | <a href="#">234839</a>    | cDNA sequence BC039210            | <a href="#">BC039210</a>           | 1.698 | 7.782 | 9.29706e-05 | 0.00266726 |
| 670 | 10493812 | <a href="#">NM_011311</a>          | <a href="#">20198</a>     | S100 calcium binding protein A    | <a href="#">S100a4</a>             | 1.697 | 4.262 | 0.00348931  | 0.0317052  |
| 671 | 10491732 | <a href="#">NM_183221</a>          | <a href="#">329628</a>    | FAT tumor suppressor homolog<br>4 | <a href="#">Fat4</a>               | 1.696 | 3.199 | 0.0145011   | 0.0882145  |
| 672 | 10500804 | <a href="#">BC027582</a>           | <a href="#">269472</a>    | cDNA sequence BC027582            | <a href="#">BC027582</a>           | 1.696 | 5.405 | 0.000908851 | 0.0122556  |
| 673 | 10596200 | <a href="#">NM_178638</a>          | <a href="#">81907</a>     | transmembrane protein 108         | <a href="#">Tmem108</a>            | 1.696 | 5.587 | 0.000745537 | 0.0107236  |
| 674 | 10400510 | <a href="#">NM_025809</a>          | <a href="#">66864</a>     | C-type lectin domain family 14    | <a href="#">Clec14a</a>            | 1.695 | 5.446 | 0.000868579 | 0.0118638  |
| 675 | 10543802 | <a href="#">NM_175750</a>          | <a href="#">243743</a>    | plexin A4                         | <a href="#">Plxna4</a>             | 1.695 | 7.835 | 8.89497e-05 | 0.00259414 |
| 676 | 10604751 | <a href="#">NM_010200</a>          | <a href="#">14168</a>     | fibroblast growth factor 13       | <a href="#">Fgf13</a>              | 1.694 | 6.506 | 0.000292766 | 0.00564804 |
| 677 | 10540509 | <a href="#">NM_177328</a>          | <a href="#">108073</a>    | glutamate receptor, metabotrop    | <a href="#">Grm7</a>               | 1.693 | 3.223 | 0.014004    | 0.0858692  |
| 678 | 10605256 | <a href="#">NM_010227</a>          | <a href="#">192176</a>    | filamin, alpha                    | <a href="#">Flna</a>               | 1.693 | 4.492 | 0.00262259  | 0.0262931  |
| 679 | 10363265 | <a href="#">NM_026148</a>          | <a href="#">110829</a>    | LIM and senescent cell antigen    | <a href="#">Lims1</a>              | 1.693 | 9.479 | 2.51065e-05 | 0.00108971 |
| 680 | 10545401 | <a href="#">NM_016872</a>          | <a href="#">53620</a>     | vesicle-associated membrane pr    | <a href="#">Vamp5</a>              | 1.693 | 5.752 | 0.000625845 | 0.00949734 |
| 681 | 10350438 | <a href="#">NM_001081027</a>       | <a href="#">240776</a>    | potassium channel, subfamily T    | <a href="#">Kent2</a>              | 1.691 | 2.524 | 0.0386141   | 0.16991    |
| 682 | 10475314 | <a href="#">NM_032393</a>          | <a href="#">17754</a>     | microtubule-associated protein    | <a href="#">Mtap1a</a>             | 1.689 | 7.358 | 0.000133766 | 0.00334716 |
| 683 | 10602739 | <a href="#">NM_019736</a>          | <a href="#">56360</a>     | acyl-CoA thioesterase 9           | <a href="#">Acot9</a>              | 1.686 | 4.129 | 0.00413451  | 0.0357546  |
| 684 | 10455901 | <a href="#">NM_001081072</a>       | <a href="#">225579</a>    | solute carrier family 27 (fatt    | <a href="#">Slc27a6</a>            | 1.685 | 4.809 | 0.00179077  | 0.0198551  |
| 685 | 10607283 | <a href="#">NM_030700</a>          | <a href="#">80884</a>     | melanoma antigen, family D, 2     | <a href="#">Maged2</a>             | 1.685 | 5.752 | 0.000625609 | 0.00949734 |
| 686 | 10455483 | <a href="#">ENSMUST00000037763</a> | <a href="#">240255</a>    | YTH domain containing 2           | <a href="#">Ythdc2</a>             | 1.685 | 5.265 | 0.00106145  | 0.0136932  |
| 687 | 10405605 | <a href="#">NM_008541</a>          | <a href="#">17129</a>     | MAD homolog 5 (Drosophila)        | <a href="#">Smad5</a>              | 1.683 | 6.669 | 0.000250537 | 0.00510341 |
| 688 | 10502881 | <a href="#">NM_012028</a>          | <a href="#">26938</a>     | ST6 (alpha-N-acetyl-neuraminyl    | <a href="#">St6galnac5</a>         | 1.682 | 7.416 | 0.000127069 | 0.00324487 |
| 689 | 10607189 | <a href="#">NM_153319</a>          | <a href="#">27494</a>     | angiomin                          | <a href="#">Amot</a>               | 1.682 | 6.145 | 0.000417736 | 0.00716699 |
| 690 | 10371379 | <a href="#">NM_001004363</a>       | <a href="#">77976</a>     | NUAK family, SNF1-like<br>kinase, | <a href="#">Nuak1</a>              | 1.681 | 5.302 | 0.00101829  | 0.0133153  |
| 691 | 10493604 | <a href="#">NM_172530</a>          | <a href="#">214547</a>    | src homology 2 domain-containi    | <a href="#">She</a>                | 1.681 | 5.048 | 0.00135708  | 0.0163206  |
| 692 | 10408693 | <a href="#">NM_028784</a>          | <a href="#">74145</a>     | coagulation factor XIII, A1 su    | <a href="#">F13a1</a>              | 1.681 | 8.418 | 5.54712e-05 | 0.00186897 |
| 693 | 10416974 | <a href="#">NM_001079844</a>       | <a href="#">23888</a>     | glypican 6                        | <a href="#">Gpc6</a>               | 1.681 | 5.208 | 0.00113136  | 0.0143157  |
| 694 | 10604832 |                                    |                           |                                   |                                    | 1.681 | 2.175 | 0.0650398   | 0.237842   |
| 695 | 10467124 | <a href="#">NM_007392</a>          | <a href="#">11475</a>     | actin, alpha 2, smooth muscle,    | <a href="#">Acta2</a>              | 1.68  | 1.149 | 0.287226    | 0.562985   |
| 696 | 10552245 | <a href="#">NM_172298</a>          | <a href="#">243931</a>    | teashirt zinc finger family me    | <a href="#">Tshz3</a>              | 1.68  | 6.334 | 0.000346188 | 0.00625014 |
| 697 | 10411229 | <a href="#">NM_010169</a>          | <a href="#">14062</a>     | coagulation factor II (thrombi    | <a href="#">F2r</a>                | 1.679 | 7.123 | 0.00016481  | 0.00387193 |
| 698 | 10557960 | <a href="#">NM_009365</a>          | <a href="#">21804</a>     | transforming growth factor bet    | <a href="#">Tgfb1l1</a>            | 1.677 | 3.326 | 0.0121292   | 0.0774338  |
| 699 | 10554808 | <a href="#">NM_008055</a>          | <a href="#">14366</a>     | frizzled homolog 4 (Drosophila    | <a href="#">Fzd4</a>               | 1.677 | 4.614 | 0.00226116  | 0.0237861  |
| 700 | 10538706 | <a href="#">ENSMUST00000114267</a> | <a href="#">70945</a>     | multimerin 1                      | <a href="#">Mmnr1</a>              | 1.677 | 4.533 | 0.002493    | 0.0253776  |
| 701 | 10355536 | <a href="#">ENSMUST00000050681</a> | <a href="#">21961</a>     | tensin 1                          | <a href="#">Tns1</a>               | 1.676 | 6.112 | 0.000431699 | 0.00729643 |
| 702 | 10416700 | <a href="#">NM_001013753</a>       | <a href="#">219228</a>    | protocadherin 17                  | <a href="#">Pcdh17</a>             | 1.675 | 6.332 | 0.000346737 | 0.00625014 |
| 703 | 10547641 | <a href="#">NM_011401</a>          | <a href="#">20527</a>     | solute carrier family 2 (facil    | <a href="#">Slc2a3</a>             | 1.672 | 5.134 | 0.00122962  | 0.0152577  |
| 704 | 10428534 | <a href="#">NM_032000</a>          | <a href="#">83925</a>     | trichorhinophalangeal syndrome    | <a href="#">Trps1</a>              | 1.671 | 8.788 | 4.16924e-05 | 0.00153847 |
| 705 | 10513320 | <a href="#">NM_025968</a>          | <a href="#">67103</a>     | leukotriene B4 12-hydroxydehyd    | <a href="#">Ltb4dh</a>             | 1.671 | 6.565 | 0.00027646  | 0.00540246 |
| 706 | 10517165 | <a href="#">NM_013706</a>          | <a href="#">23833</a>     | CD52 antigen                      | <a href="#">Cd52</a>               | 1.669 | 4.097 | 0.0043046   | 0.0367744  |
| 707 | 10367024 | <a href="#">NM_009312</a>          | <a href="#">21334</a>     | tachykinin 2                      | <a href="#">Tac2</a>               | 1.667 | 2.701 | 0.0297571   | 0.142831   |
| 708 | 10604743 | <a href="#">NR_002903</a>          | <a href="#">353374</a>    | small nucleolar RNA, C/D box 6    | <a href="#">Snord61</a>            | 1.666 | 0.807 | 0.445255    | 0.70357    |
| 709 | 10358603 | <a href="#">NM_001024720</a>       | <a href="#">545370</a>    | hemicentin 1                      | <a href="#">Hmcn1</a>              | 1.666 | 5.797 | 0.000596971 | 0.00919327 |
| 710 | 10380654 | <a href="#">NM_001079869</a>       | <a href="#">15410</a>     | homeo box B3                      | <a href="#">Hoxb3</a>              | 1.665 | 8.058 | 7.39709e-05 | 0.00226017 |
| 711 | 10458894 | <a href="#">NM_010728</a>          | <a href="#">16948</a>     | lysyl oxidase                     | <a href="#">Lox</a>                | 1.665 | 2.407 | 0.0459437   | 0.19003    |
| 712 | 10496872 | <a href="#">NM_133222</a>          | <a href="#">170757</a>    | EGF, latrophilin seven transme    | <a href="#">Eltf1</a>              | 1.665 | 5.885 | 0.000544278 | 0.00859115 |

|     |          |                                    |                           |                                 |                                    |       |        |             |             |
|-----|----------|------------------------------------|---------------------------|---------------------------------|------------------------------------|-------|--------|-------------|-------------|
| 713 | 10433075 | <a href="#">ENSMUST00000053475</a> | <a href="#">77096</a>     | RIKEN cDNA 5730585A16 gene      | <a href="#">5730585A16Rik</a>      | 1.662 | 1.993  | 0.0852992   | 0.280405    |
| 714 | 10499168 | <a href="#">NM_130867</a>          | <a href="#">170643</a>    | kin of IRRE like (Drosophila)   | <a href="#">Kirrel</a>             | 1.662 | 8.229  | 6.44151e-05 | 0.00205963  |
| 715 | 10573115 | <a href="#">NM_177378</a>          | <a href="#">330812</a>    | ring finger protein 150         | <a href="#">Rnf150</a>             | 1.661 | 5.084  | 0.0013013   | 0.0158638   |
| 716 | 10531177 | <a href="#">NM_001081401</a>       | <a href="#">330119</a>    | a disintegrin-like and metallo  | <a href="#">Adamts3</a>            | 1.66  | 5.112  | 0.00126079  | 0.0155532   |
| 717 | 10456071 | <a href="#">NM_001037859</a>       | <a href="#">12978</a>     | colony stimulating factor 1 re  | <a href="#">Csf1r</a>              | 1.66  | 5.727  | 0.00064248  | 0.00965501  |
| 718 | 10519913 | <a href="#">NM_015823</a>          | <a href="#">50791</a>     | membrane associated guanylate   | <a href="#">Magi2</a>              | 1.659 | 6.646  | 0.000255984 | 0.00516956  |
| 719 | 10586718 | <a href="#">NM_177159</a>          | <a href="#">320440</a>    | RIKEN cDNA 9530091C08 gene      | <a href="#">9530091C08Rik</a>      | 1.659 | 4.643  | 0.00218263  | 0.0231857   |
| 720 | 10471721 | <a href="#">NM_008969</a>          | <a href="#">19224</a>     | prostaglandin-endoperoxide syn  | <a href="#">Ptgs1</a>              | 1.659 | 11.857 | 5.45444e-06 | 0.000404662 |
| 721 | 10546421 | <a href="#">NM_001081146</a>       | <a href="#">243548</a>    | prickle-like 2 (Drosophila)     | <a href="#">Prickle2</a>           | 1.659 | 3.171  | 0.0150877   | 0.0907579   |
| 722 | 10363379 | <a href="#">NM_144822</a>          | <a href="#">216001</a>    | calcium binding atopy-related   | <a href="#">Cbaral</a>             | 1.659 | 4.332  | 0.00319741  | 0.0299672   |
| 723 | 10544875 | <a href="#">NM_027268</a>          | <a href="#">69938</a>     | secernin 1                      | <a href="#">Scrn1</a>              | 1.658 | 2.418  | 0.0452136   | 0.188022    |
| 724 | 10405633 | <a href="#">NM_001025074</a>       | <a href="#">18212</a>     | neurotrophic tyrosine kinase,   | <a href="#">Ntrk2</a>              | 1.657 | 2.878  | 0.0229542   | 0.120303    |
| 725 | 10585180 | <a href="#">ENSMUST00000068730</a> | <a href="#">100036537</a> | predicted gene, ENSMUSG0000006  | <a href="#">ENSMUSG00000060603</a> | 1.656 | 4.311  | 0.00328399  | 0.0304569   |
| 726 | 10463799 | <a href="#">ENSMUST00000104904</a> | <a href="#">329070</a>    | predicted gene, EG329070        | <a href="#">EG329070</a>           | 1.656 | 5.469  | 0.000847132 | 0.0116537   |
| 727 | 10528038 | <a href="#">NM_001007220</a>       | <a href="#">11496</a>     | a disintegrin and metalloprotei | <a href="#">Adam22</a>             | 1.655 | 5.487  | 0.000831233 | 0.0115242   |
| 728 | 10606600 | <a href="#">NM_001105245</a>       | <a href="#">279653</a>    | protocadherin 19                | <a href="#">Pcdh19</a>             | 1.655 | 3.467  | 0.00997224  | 0.0679951   |
| 729 | 10436372 | <a href="#">NM_028523</a>          | <a href="#">73379</a>     | discoidin, CUB and LCCL domain  | <a href="#">Dcbl2</a>              | 1.654 | 6.816  | 0.000218118 | 0.00469165  |
| 730 | 10413047 | <a href="#">NM_008873</a>          | <a href="#">18792</a>     | plasminogen activator, urokina  | <a href="#">Plau</a>               | 1.654 | 4.044  | 0.00461375  | 0.0388503   |
| 731 | 10464370 | <a href="#">NM_172523</a>          | <a href="#">214084</a>    | solute carrier family 18 (vesi  | <a href="#">Slc18a2</a>            | 1.654 | 5.72   | 0.000647199 | 0.00970523  |
| 732 | 10429160 | <a href="#">NM_009177</a>          | <a href="#">20442</a>     | ST3 beta-galactoside alpha-2,3  | <a href="#">St3gal1</a>            | 1.654 | 4.56   | 0.00241313  | 0.0248266   |
| 733 | 10455080 | <a href="#">NM_053134</a>          | <a href="#">93880</a>     | protocadherin beta 9            | <a href="#">Pcdhb9</a>             | 1.653 | 5.124  | 0.00124324  | 0.0154086   |
| 734 | 10594066 | <a href="#">NM_010729</a>          | <a href="#">16949</a>     | lysyl oxidase-like 1            | <a href="#">Loxl1</a>              | 1.653 | 6.534  | 0.00028503  | 0.00552972  |
| 735 | 10482030 | <a href="#">NM_013515</a>          | <a href="#">13830</a>     | stomatin                        | <a href="#">Stom</a>               | 1.652 | 3.337  | 0.0119442   | 0.0765762   |
| 736 | 10367673 | <a href="#">NM_001033253</a>       | <a href="#">213783</a>    | pleckstrin homology domain con  | <a href="#">Plekhg1</a>            | 1.651 | 4.81   | 0.0017891   | 0.0198551   |
| 737 | 10587107 | <a href="#">NM_010864</a>          | <a href="#">17918</a>     | myosin Va                       | <a href="#">Myo5a</a>              | 1.651 | 7.437  | 0.000124763 | 0.00320532  |
| 738 | 10603708 | <a href="#">NM_009806</a>          | <a href="#">12361</a>     | calcium/calmodulin-dependent s  | <a href="#">Cask</a>               | 1.65  | 4.181  | 0.00387002  | 0.0341512   |
| 739 | 10354588 | <a href="#">NM_133810</a>          | <a href="#">98267</a>     | serine/threonine kinase 17b (a  | <a href="#">Stk17b</a>             | 1.648 | 3.372  | 0.0113657   | 0.0739888   |
| 740 | 10571233 | <a href="#">NM_134161</a>          | <a href="#">171167</a>    | fucosyltransferase 10           | <a href="#">Fut10</a>              | 1.648 | 4.551  | 0.00243894  | 0.024997    |
| 741 | 10599680 | <a href="#">NM_027510</a>          | <a href="#">70691</a>     | RIKEN cDNA 3830403N18 gene      | <a href="#">3830403N18Rik</a>      | 1.647 | 2.458  | 0.0425963   | 0.180844    |
| 742 | 10601343 | <a href="#">NM_053201</a>          | <a href="#">107528</a>    | melanoma antigen, family E, 1   | <a href="#">Magee1</a>             | 1.647 | 6.97   | 0.000189221 | 0.00422927  |
| 743 | 10546631 | <a href="#">NM_145148</a>          | <a href="#">232288</a>    | FERM domain containing 4B       | <a href="#">Frm4b</a>              | 1.646 | 6.145  | 0.000417745 | 0.00716699  |
| 744 | 10428536 | <a href="#">NM_032000</a>          | <a href="#">83925</a>     | trichorhinophalangeal syndrome  | <a href="#">Trps1</a>              | 1.646 | 4.458  | 0.00273411  | 0.0271154   |
| 745 | 10362440 |                                    |                           |                                 |                                    | 1.646 | 1.83   | 0.108672    | 0.325457    |
| 746 | 10565315 | <a href="#">NM_010176</a>          | <a href="#">14085</a>     | fumarylacetoacetate hydrolase   | <a href="#">Fah</a>                | 1.643 | 3.73   | 0.00696872  | 0.052362    |
| 747 | 10375360 | <a href="#">NM_007897</a>          | <a href="#">13591</a>     | early B-cell factor 1           | <a href="#">Ebf1</a>               | 1.643 | 2.268  | 0.0565266   | 0.217348    |
| 748 | 10439612 | <a href="#">NM_172506</a>          | <a href="#">117606</a>    | biregional cell adhesion molec  | <a href="#">Boc</a>                | 1.643 | 5.415  | 0.000898449 | 0.0121374   |
| 749 | 10600857 | <a href="#">NM_010417</a>          | <a href="#">15203</a>     | hephaestin                      | <a href="#">Heph</a>               | 1.642 | 4.715  | 0.00200193  | 0.0216405   |
| 750 | 10585976 |                                    |                           |                                 |                                    | 1.642 | 2.425  | 0.0447447   | 0.187121    |
| 751 | 10466200 | <a href="#">NM_027836</a>          | <a href="#">109225</a>    | membrane-spanning 4-domains, s  | <a href="#">Ms4a7</a>              | 1.64  | 6.461  | 0.00030584  | 0.00579961  |
| 752 | 10503098 | <a href="#">NM_001111096</a>       | <a href="#">17096</a>     | Yamaguchi sarcoma viral (v-yes  | <a href="#">Lyn</a>                | 1.639 | 4.87   | 0.00166729  | 0.0188053   |
| 753 | 10352234 | <a href="#">NM_001081175</a>       | <a href="#">320404</a>    | inositol 1,4,5-trisphosphate 3  | <a href="#">Itpkb</a>              | 1.638 | 6.776  | 0.000226496 | 0.0047976   |
| 754 | 10548043 | <a href="#">NM_145983</a>          | <a href="#">16493</a>     | potassium voltage-gated channe  | <a href="#">Kena5</a>              | 1.638 | 6.512  | 0.000290936 | 0.00562298  |
| 755 | 10374842 | <a href="#">NM_176841</a>          | <a href="#">108686</a>    | coiled coil domain containing   | <a href="#">Ccdc88a</a>            | 1.637 | 9.686  | 2.17056e-05 | 0.000999095 |
| 756 | 10497481 | <a href="#">ENSMUST00000057404</a> | <a href="#">100040353</a> | RIKEN cDNA 2810416G20 gene      | <a href="#">2810416G20Rik</a>      | 1.637 | 2.945  | 0.0208284   | 0.113009    |
| 757 | 10351491 | <a href="#">NM_177068</a>          | <a href="#">320078</a>    | olfactomedin-like 2B            | <a href="#">Olfml2b</a>            | 1.635 | 4.495  | 0.00261382  | 0.0262175   |
| 758 | 10603551 | <a href="#">NM_007807</a>          | <a href="#">13058</a>     | cytochrome b-245, beta polypep  | <a href="#">Cybb</a>               | 1.635 | 2.511  | 0.0394084   | 0.172266    |
| 759 | 10398240 | <a href="#">NM_001043335</a>       | <a href="#">68519</a>     | echinoderm microtubule associa  | <a href="#">Eml1</a>               | 1.635 | 9.012  | 3.52457e-05 | 0.0013674   |
| 760 | 10447141 | <a href="#">NM_001114361</a>       | <a href="#">78798</a>     | echinoderm microtubule associa  | <a href="#">Eml4</a>               | 1.635 | 7.659  | 0.000103105 | 0.00283493  |
| 761 | 10493798 | <a href="#">NM_026416</a>          | <a href="#">67860</a>     | S100 calcium binding protein A  | <a href="#">S100a16</a>            | 1.635 | 4.52   | 0.00253534  | 0.0256417   |
| 762 | 10571241 | <a href="#">NM_001098233</a>       | <a href="#">75029</a>     | purine-rich element binding pr  | <a href="#">Purg</a>               | 1.635 | 6.856  | 0.000210204 | 0.00457259  |
| 763 | 10497079 | <a href="#">NM_011196</a>          | <a href="#">19218</a>     | prostaglandin E receptor 3 (su  | <a href="#">Ptger3</a>             | 1.634 | 5.896  | 0.000538231 | 0.008531    |

|     |          |                                    |                        |                                |                               |       |        |             |             |
|-----|----------|------------------------------------|------------------------|--------------------------------|-------------------------------|-------|--------|-------------|-------------|
| 764 | 10561212 | <a href="#">NM_175641</a>          | <a href="#">108075</a> | latent transforming growth fac | <a href="#">Ltbp4</a>         | 1.633 | 6.109  | 0.00043295  | 0.00731173  |
| 765 | 10544133 | <a href="#">NM_172893</a>          | <a href="#">243771</a> | poly (ADP-ribose) polymerase f | <a href="#">Parp12</a>        | 1.632 | 3.211  | 0.014259    | 0.0870861   |
| 766 | 10423548 | <a href="#">NM_008304</a>          | <a href="#">15529</a>  | syndecan 2                     | <a href="#">Sdc2</a>          | 1.632 | 6.402  | 0.000323767 | 0.00598926  |
| 767 | 10346015 | <a href="#">NM_009930</a>          | <a href="#">12825</a>  | collagen, type III, alpha 1    | <a href="#">Col3a1</a>        | 1.63  | 5.292  | 0.00102983  | 0.013395    |
| 768 | 10545101 | <a href="#">NM_019455</a>          | <a href="#">54486</a>  | prostaglandin D2 synthase 2, h | <a href="#">Ptgds2</a>        | 1.629 | 3.583  | 0.00850013  | 0.0604478   |
| 769 | 10521616 | <a href="#">NM_175425</a>          | <a href="#">109323</a> | CIq and tumor necrosis factor  | <a href="#">C1qtnf7</a>       | 1.628 | 3.772  | 0.00658924  | 0.0502789   |
| 770 | 10429128 | <a href="#">NM_001029841</a>       | <a href="#">20491</a>  | src-like adaptor               | <a href="#">Sla</a>           | 1.627 | 6.068  | 0.000451168 | 0.0075411   |
| 771 | 10371740 | <a href="#">NM_178773</a>          | <a href="#">320091</a> | transmembrane protein 16D (eig | <a href="#">Tmem16d</a>       | 1.626 | 6.185  | 0.000401394 | 0.00695093  |
| 772 | 10361807 | <a href="#">NM_010437</a>          | <a href="#">15273</a>  | human immunodeficiency virus t | <a href="#">Hivep2</a>        | 1.625 | 2.838  | 0.0243315   | 0.125082    |
| 773 | 10416897 |                                    |                        |                                |                               | 1.625 | 1.63   | 0.145882    | 0.387407    |
| 774 | 10545001 | <a href="#">NM_175523</a>          | <a href="#">243382</a> | protein phosphatase 1K (PP2C d | <a href="#">Ppm1k</a>         | 1.624 | 8.223  | 6.47401e-05 | 0.00206013  |
| 775 | 10490818 | <a href="#">NM_025285</a>          | <a href="#">20257</a>  | stathmin-like 2                | <a href="#">Stmn2</a>         | 1.621 | 2.489  | 0.0406768   | 0.175848    |
| 776 | 10360479 | <a href="#">NM_001099637</a>       | <a href="#">545389</a> | centrosomal protein 170        | <a href="#">Cep170</a>        | 1.621 | 8.794  | 4.14917e-05 | 0.00153643  |
| 777 | 10585988 |                                    |                        |                                |                               | 1.62  | 3.302  | 0.0125296   | 0.0792008   |
| 778 | 10347583 | <a href="#">NM_010043</a>          | <a href="#">13346</a>  | desmin                         | <a href="#">Des</a>           | 1.62  | 10.054 | 1.68593e-05 | 0.000840941 |
| 779 | 10375046 | <a href="#">NM_010405</a>          | <a href="#">15126</a>  | hemoglobin X, alpha-like embry | <a href="#">Hba-x</a>         | 1.618 | 4.482  | 0.00265484  | 0.0265502   |
| 780 | 10442069 | <a href="#">NM_025681</a>          | <a href="#">66643</a>  | limb expression 1 homolog (chi | <a href="#">Lix1</a>          | 1.617 | 2.916  | 0.0217241   | 0.115825    |
| 781 | 10503023 | <a href="#">NM_145953</a>          | <a href="#">107869</a> | cystathionase (cystathionine g | <a href="#">Cth</a>           | 1.617 | 4.821  | 0.00176565  | 0.0196489   |
| 782 | 10363696 | <a href="#">AK038706</a>           | <a href="#">320379</a> | RIKEN cDNA D630028G08 gene     | <a href="#">D630028G08Rik</a> | 1.615 | 3.969  | 0.00508567  | 0.0417922   |
| 783 | 10590663 | <a href="#">NM_019691</a>          | <a href="#">14802</a>  | glutamate receptor, ionotropic | <a href="#">Gria4</a>         | 1.615 | 3.225  | 0.0139787   | 0.0858203   |
| 784 | 10495054 | <a href="#">NM_007484</a>          | <a href="#">11853</a>  | ras homolog gene family, membe | <a href="#">Rhoc</a>          | 1.614 | 6.563  | 0.00027701  | 0.00540322  |
| 785 | 10504375 | <a href="#">NM_173788</a>          | <a href="#">230103</a> | natriuretic peptide receptor 2 | <a href="#">Npr2</a>          | 1.613 | 9.609  | 2.28955e-05 | 0.00102782  |
| 786 | 10456522 | <a href="#">NM_013685</a>          | <a href="#">21413</a>  | transcription factor 4         | <a href="#">Tcf4</a>          | 1.61  | 6.879  | 0.00020588  | 0.0045157   |
| 787 | 10384504 | <a href="#">NM_010789</a>          | <a href="#">17268</a>  | Meis homeobox 1                | <a href="#">Meis1</a>         | 1.61  | 10.293 | 1.43699e-05 | 0.000757701 |
| 788 | 10455135 | <a href="#">NM_053146</a>          | <a href="#">93892</a>  | protocadherin beta 21          | <a href="#">Pcdhb21</a>       | 1.609 | 3.753  | 0.00675918  | 0.051242    |
| 789 | 10396476 | <a href="#">NM_023275</a>          | <a href="#">80837</a>  | ras homolog gene family, membe | <a href="#">Rhoj</a>          | 1.609 | 3.66   | 0.00766087  | 0.0563022   |
| 790 | 10393272 | <a href="#">ENSMUST00000100202</a> | <a href="#">217340</a> | ring finger protein 157        | <a href="#">Rnf157</a>        | 1.608 | 6.941  | 0.000194363 | 0.00432822  |
| 791 | 10458028 | <a href="#">NM_001048207</a>       | <a href="#">71683</a>  | glycophorin C                  | <a href="#">Gyphc</a>         | 1.606 | 5.802  | 0.000593953 | 0.00916676  |
| 792 | 10527713 | <a href="#">NM_080468</a>          | <a href="#">140498</a> | relaxin/insulin-like family pe | <a href="#">Rxfp2</a>         | 1.605 | 2.309  | 0.0532213   | 0.209282    |
| 793 | 10457644 | <a href="#">NM_007664</a>          | <a href="#">12558</a>  | cadherin 2                     | <a href="#">Cdh2</a>          | 1.605 | 5.017  | 0.00140531  | 0.0166745   |
| 794 | 10362245 | <a href="#">NM_013511</a>          | <a href="#">13822</a>  | erythrocyte protein band 4.1-1 | <a href="#">Epb4.112</a>      | 1.605 | 6.433  | 0.000314019 | 0.00587058  |
| 795 | 10474671 | <a href="#">NM_033524</a>          | <a href="#">114715</a> | sprouty protein with EVH-1 dom | <a href="#">Spred1</a>        | 1.605 | 7.163  | 0.00015899  | 0.00378143  |
| 796 | 10491414 | <a href="#">NM_001013024</a>       | <a href="#">72607</a>  | ubiquitin specific peptidase 1 | <a href="#">Usp13</a>         | 1.605 | 5.404  | 0.000909701 | 0.0122592   |
| 797 | 10395409 | <a href="#">NM_008584</a>          | <a href="#">17286</a>  | mesenchyme homeobox 2          | <a href="#">Meox2</a>         | 1.604 | 3.975  | 0.00504666  | 0.0415985   |
| 798 | 10467038 | <a href="#">BC096400</a>           | <a href="#">625995</a> | ubiquitin-like 5 pseudogene    | <a href="#">LOC625995</a>     | 1.603 | 1.863  | 0.103574    | 0.316379    |
| 799 | 10380289 | <a href="#">NM_026178</a>          | <a href="#">67468</a>  | monocyte to macrophage differe | <a href="#">Mmd</a>           | 1.602 | 3.531  | 0.00912455  | 0.0635892   |
| 800 | 10423109 | <a href="#">NM_175501</a>          | <a href="#">239337</a> | a disintegrin-like and metallo | <a href="#">Adamts12</a>      | 1.602 | 9.844  | 1.94483e-05 | 0.00093035  |
| 801 | 10448836 | <a href="#">NM_001001183</a>       | <a href="#">407831</a> | transmembrane protein 204      | <a href="#">Tmem204</a>       | 1.601 | 7.514  | 0.00011672  | 0.00308492  |
| 802 | 10566846 | <a href="#">NM_021494</a>          | <a href="#">19347</a>  | Rab6 interacting protein 1     | <a href="#">Rab6ip1</a>       | 1.601 | 7.052  | 0.000175657 | 0.00405467  |
| 803 | 10603206 | <a href="#">ENSMUST00000052299</a> | <a href="#">237246</a> | cDNA sequence BC022960         | <a href="#">BC022960</a>      | 1.601 | 3.662  | 0.00763893  | 0.0562191   |
| 804 | 10608001 | <a href="#">NM_012011</a>          | <a href="#">26908</a>  | eukaryotic translation initiat | <a href="#">Eif2s3y</a>       | 1.6   | 0.974  | 0.361747    | 0.633386    |
| 805 | 10368999 | <a href="#">NM_010349</a>          | <a href="#">14806</a>  | glutamate receptor, ionotropic | <a href="#">Grik2</a>         | 1.6   | 3.717  | 0.00709944  | 0.0532079   |
| 806 | 10452613 | <a href="#">NM_172964</a>          | <a href="#">268970</a> | Rho GTPase activating protein  | <a href="#">Arhgap28</a>      | 1.599 | 3.92   | 0.00541852  | 0.0437454   |
| 807 | 10441787 | <a href="#">BC009123</a>           | <a href="#">72704</a>  | RIKEN cDNA 2810051F02 gene     | <a href="#">2810051F02Rik</a> | 1.599 | 4.742  | 0.00193934  | 0.0210933   |
| 808 | 10600308 |                                    |                        |                                |                               | 1.598 | 4.791  | 0.00182919  | 0.020186    |
| 809 | 10600169 | <a href="#">NM_007542</a>          | <a href="#">12111</a>  | biglycan                       | <a href="#">Bgn</a>           | 1.598 | 4.274  | 0.00343746  | 0.0314073   |
| 810 | 10537712 | <a href="#">NM_029555</a>          | <a href="#">76263</a>  | glutathione S-transferase kapp | <a href="#">Gstk1</a>         | 1.594 | 5.262  | 0.00106405  | 0.0137094   |
| 811 | 10474229 | <a href="#">NM_001111060</a>       | <a href="#">12509</a>  | CD59a antigen                  | <a href="#">Cd59a</a>         | 1.594 | 1.647  | 0.142246    | 0.382232    |
| 812 | 10492798 | <a href="#">NM_009144</a>          | <a href="#">20319</a>  | secreted frizzled-related prot | <a href="#">Sfrp2</a>         | 1.594 | 4.073  | 0.00444018  | 0.0376095   |
| 813 | 10452485 | <a href="#">NM_133685</a>          | <a href="#">106572</a> | RAB31, member RAS oncogene fam | <a href="#">Rab31</a>         | 1.592 | 4.526  | 0.00251542  | 0.0255211   |
| 814 | 10379615 | <a href="#">NM_183201</a>          | <a href="#">327978</a> | schlafen 5                     | <a href="#">Slfn5</a>         | 1.59  | 4.878  | 0.00165203  | 0.0187295   |
| 815 | 10482500 | <a href="#">NM_028810</a>          | <a href="#">74194</a>  | Rho family GTPase 3            | <a href="#">Rnd3</a>          | 1.59  | 7.245  | 0.000147753 | 0.0035704   |
| 816 | 10375245 | <a href="#">NM_008070</a>          | <a href="#">14401</a>  | gamma-aminobutyric acid (GABA- | <a href="#">Gabbr2</a>        | 1.589 | 3.617  | 0.00812287  | 0.0585578   |
| 817 | 10358513 | <a href="#">NM_001024720</a>       | <a href="#">545370</a> | hemicentin 1                   | <a href="#">Hmcn1</a>         | 1.587 | 1.678  | 0.136068    | 0.372141    |
| 818 | 10361356 |                                    |                        |                                |                               | 1.587 | 2.933  | 0.0211995   | 0.114027    |

|     |          |                                    |                           |                                |                                    |       |       |             |            |
|-----|----------|------------------------------------|---------------------------|--------------------------------|------------------------------------|-------|-------|-------------|------------|
| 819 | 10453049 | <a href="#">NM_026514</a>          | <a href="#">260409</a>    | CDC42 effector protein (Rho GT | <a href="#">Cdc42ep3</a>           | 1.586 | 2.957 | 0.0204768   | 0.111886   |
| 820 | 10579012 | <a href="#">NM_172753</a>          | <a href="#">234356</a>    | chondroitin sulfate N-acetylga | <a href="#">Csgalnact1</a>         | 1.586 | 6.417 | 0.000319167 | 0.00592742 |
| 821 | 10511180 | <a href="#">NM_024263</a>          | <a href="#">74761</a>     | matrix-remodelling associated  | <a href="#">Mxra8</a>              | 1.586 | 6.922 | 0.000197836 | 0.0043708  |
| 822 | 10366476 | <a href="#">NM_029928</a>          | <a href="#">19263</a>     | protein tyrosine phosphatase,  | <a href="#">Ptprb</a>              | 1.585 | 8.655 | 4.61431e-05 | 0.00165645 |
| 823 | 10474201 | <a href="#">NM_008505</a>          | <a href="#">16909</a>     | LIM domain only 2              | <a href="#">Lmo2</a>               | 1.585 | 4.354 | 0.00311078  | 0.0294293  |
| 824 | 10353252 | <a href="#">NM_001033288</a>       | <a href="#">226866</a>    | gene model 106, (NCBI)         | <a href="#">Gm106</a>              | 1.584 | 5.228 | 0.00110599  | 0.0140789  |
| 825 | 10472378 | <a href="#">NM_001099298</a>       | <a href="#">110876</a>    | sodium channel, voltage-gated, | <a href="#">Scn2a1</a>             | 1.584 | 2.848 | 0.0239873   | 0.123827   |
| 826 | 10516481 | <a href="#">NM_008120</a>          | <a href="#">14612</a>     | gap junction protein, alpha 4  | <a href="#">Gja4</a>               | 1.584 | 6.643 | 0.000256824 | 0.00517663 |
| 827 | 10604853 | <a href="#">NM_178740</a>          | <a href="#">245446</a>    | SLIT and NTRK-like family, mem | <a href="#">Slitrk4</a>            | 1.583 | 5.826 | 0.000579252 | 0.00898584 |
| 828 | 10588495 | <a href="#">NM_153459</a>          | <a href="#">235584</a>    | dual specificity phosphatase 7 | <a href="#">Dusp7</a>              | 1.581 | 4.263 | 0.00348642  | 0.0316926  |
| 829 | 10517508 | <a href="#">NM_009777</a>          | <a href="#">12260</a>     | complement component 1, q subc | <a href="#">C1qb</a>               | 1.581 | 3.426 | 0.0105445   | 0.0705216  |
| 830 | 10370510 | <a href="#">ENSMUST00000040580</a> | <a href="#">71709</a>     | synapse defective 1, Rho GTPas | <a href="#">Syde1</a>              | 1.581 | 6.387 | 0.000328601 | 0.00605222 |
| 831 | 10604694 | <a href="#">NM_177293</a>          | <a href="#">320923</a>    | MAP7 domain containing 3       | <a href="#">Mtap7d3</a>            | 1.58  | 3.639 | 0.0078783   | 0.0573618  |
| 832 | 10492169 | <a href="#">NM_010750</a>          | <a href="#">17116</a>     | mab-21-like 1 (C. elegans)     | <a href="#">Mab2111</a>            | 1.579 | 5.841 | 0.00057021  | 0.00889123 |
| 833 | 10571252 | <a href="#">NM_031374</a>          | <a href="#">104271</a>    | testis expressed gene 15       | <a href="#">Tex15</a>              | 1.579 | 3.841 | 0.00601711  | 0.0469988  |
| 834 | 10507040 | <a href="#">NM_026470</a>          | <a href="#">67946</a>     | spermatogenesis associated 6   | <a href="#">Spata6</a>             | 1.579 | 7.339 | 0.000135921 | 0.0033771  |
| 835 | 10491601 | <a href="#">ENSMUST00000057272</a> | <a href="#">229227</a>    | RIKEN cDNA 4932438A13 gene     | <a href="#">4932438A13Rik</a>      | 1.579 | 3.146 | 0.0156174   | 0.0928214  |
| 836 | 10503952 | <a href="#">NM_199157</a>          | <a href="#">387510</a>    | interferon kappa               | <a href="#">Ifnk</a>               | 1.579 | 3.95  | 0.00520904  | 0.0424541  |
| 837 | 10604610 |                                    |                           |                                |                                    | 1.578 | 7.261 | 0.00014566  | 0.00353339 |
| 838 | 10542857 | <a href="#">NM_178797</a>          | <a href="#">330450</a>    | male sterility domain containi | <a href="#">Mlst1</a>              | 1.577 | 7.975 | 7.9204e-05  | 0.00236365 |
| 839 | 10447190 | <a href="#">NM_177606</a>          | <a href="#">213556</a>    | pleckstrin homology domain con | <a href="#">Plekhh2</a>            | 1.577 | 4.138 | 0.00408741  | 0.0355216  |
| 840 | 10586491 | <a href="#">NM_010019</a>          | <a href="#">13143</a>     | death-associated kinase 2      | <a href="#">Dapk2</a>              | 1.576 | 7.02  | 0.000180874 | 0.00413449 |
| 841 | 10590842 | <a href="#">ENSMUST00000098988</a> | <a href="#">100126546</a> | predicted gene, ENSMUSG0000007 | <a href="#">ENSMUSG00000074512</a> | 1.576 | 1.621 | 0.147887    | 0.390122   |
| 842 | 10608107 | <a href="#">NM_009484</a>          | <a href="#">22290</a>     | ubiquitously transcribed tetra | <a href="#">Uty</a>                | 1.575 | 1.335 | 0.222328    | 0.492087   |
| 843 | 10414747 | <a href="#">BC038136</a>           | <a href="#">236118</a>    | predicted gene, OTTMUSG0000001 | <a href="#">OTTMUSG00000015204</a> | 1.575 | 3.595 | 0.00836299  | 0.0597187  |
| 844 | 10578829 | <a href="#">NM_001081390</a>       | <a href="#">72333</a>     | palladin, cytoskeletal associa | <a href="#">Pall1</a>              | 1.575 | 5.366 | 0.000948231 | 0.0126388  |
| 845 | 10498386 | <a href="#">ENSMUST00000097075</a> | <a href="#">242050</a>    | immunoglobulin superfamily, me | <a href="#">Igsf10</a>             | 1.575 | 5.439 | 0.000875398 | 0.0119185  |
| 846 | 10458569 | <a href="#">NM_008173</a>          | <a href="#">14815</a>     | nuclear receptor subfamily 3,  | <a href="#">Nr3c1</a>              | 1.574 | 5.95  | 0.000509382 | 0.00819663 |
| 847 | 10506488 | <a href="#">NM_080555</a>          | <a href="#">67916</a>     | phosphatidic acid phosphatase  | <a href="#">Ppap2b</a>             | 1.574 | 5.09  | 0.00129218  | 0.0158118  |
| 848 | 10380571 | <a href="#">NM_023121</a>          | <a href="#">14710</a>     | guanine nucleotide binding pro | <a href="#">Gngt2</a>              | 1.573 | 3.65  | 0.00776574  | 0.0567966  |
| 849 | 10361771 | <a href="#">NM_009538</a>          | <a href="#">22634</a>     | pleiomorphic adenoma gene-like | <a href="#">Plagl1</a>             | 1.573 | 6.192 | 0.000398484 | 0.00691185 |
| 850 | 10502240 | <a href="#">NM_033525</a>          | <a href="#">114249</a>    | nephronectin                   | <a href="#">Npnt</a>               | 1.573 | 5.293 | 0.00102797  | 0.0133936  |
| 851 | 10344966 | <a href="#">NM_016923</a>          | <a href="#">17087</a>     | lymphocyte antigen 96          | <a href="#">Ly96</a>               | 1.572 | 2.708 | 0.0294365   | 0.141691   |
| 852 | 10492448 | <a href="#">NM_008987</a>          | <a href="#">19288</a>     | pentraxin related gene         | <a href="#">Ptx3</a>               | 1.572 | 3.716 | 0.00710143  | 0.0532079  |
| 853 | 10436830 | <a href="#">NM_010509</a>          | <a href="#">15976</a>     | interferon (alpha and beta) re | <a href="#">Ifnar2</a>             | 1.572 | 2.683 | 0.0305309   | 0.14545    |
| 854 | 10534862 | <a href="#">NM_008788</a>          | <a href="#">18542</a>     | procollagen C-endopeptidase en | <a href="#">Pco1ce</a>             | 1.572 | 4.669 | 0.00211465  | 0.022662   |
| 855 | 10416931 | <a href="#">NM_198865</a>          | <a href="#">75409</a>     | SLIT and NTRK-like family, mem | <a href="#">Slitrk5</a>            | 1.571 | 5.314 | 0.00100434  | 0.0131653  |
| 856 | 10425726 | <a href="#">NM_011889</a>          | <a href="#">24050</a>     | septin 3                       | <a href="#">Sept3</a>              | 1.568 | 5.094 | 0.00128719  | 0.0158051  |
| 857 | 10358978 | <a href="#">NM_010500</a>          | <a href="#">15939</a>     | immediate early response 5     | <a href="#">Ier5</a>               | 1.568 | 7.988 | 7.83339e-05 | 0.00234935 |
| 858 | 10493555 | <a href="#">NM_080466</a>          | <a href="#">140493</a>    | potassium intermediate/small c | <a href="#">Kenn3</a>              | 1.567 | 7.741 | 9.61923e-05 | 0.00272092 |
| 859 | 10554140 | <a href="#">BC116191</a>           | <a href="#">22774</a>     | zinc finger protein of the cer | <a href="#">Zfp4</a>               | 1.566 | 6.76  | 0.000229891 | 0.00483366 |
| 860 | 10496338 | <a href="#">NM_008913</a>          | <a href="#">19055</a>     | protein phosphatase 3, catalyt | <a href="#">Ppp3ca</a>             | 1.566 | 4.635 | 0.00220398  | 0.0233315  |
| 861 | 10387505 | <a href="#">NM_013415</a>          | <a href="#">11932</a>     | ATPase, Na+/K+ transporting, b | <a href="#">Atp1b2</a>             | 1.565 | 3.567 | 0.00868689  | 0.0613817  |
| 862 | 10427402 | <a href="#">NM_010284</a>          | <a href="#">14600</a>     | growth hormone receptor        | <a href="#">Ghr</a>                | 1.565 | 6.393 | 0.000326555 | 0.0060276  |
| 863 | 10593856 | <a href="#">NM_172924</a>          | <a href="#">244895</a>    | RIKEN cDNA C230081A13 gene     | <a href="#">C230081A13Rik</a>      | 1.564 | 5.844 | 0.000568089 | 0.00888438 |
| 864 | 10400126 | <a href="#">NM_010733</a>          | <a href="#">16981</a>     | leucine rich repeat protein 3, | <a href="#">Lrrn3</a>              | 1.564 | 4.293 | 0.00335597  | 0.0309053  |
| 865 | 10505143 | <a href="#">ENSMUST00000098066</a> | <a href="#">11641</a>     | A kinase (PRKA) anchor protein | <a href="#">Akap2</a>              | 1.563 | 1.33  | 0.224007    | 0.494176   |
| 866 | 10584598 |                                    |                           |                                |                                    | 1.562 | 1.788 | 0.115672    | 0.338219   |
| 867 | 10578989 | <a href="#">NM_177698</a>          | <a href="#">234353</a>    | pleckstrin and Sec7 domain con | <a href="#">Psd3</a>               | 1.56  | 5.381 | 0.000932512 | 0.0125187  |
| 868 | 10455761 | <a href="#">NM_001033281</a>       | <a href="#">225518</a>    | PR domain containing 6         | <a href="#">Prdm6</a>              | 1.559 | 3.764 | 0.00666418  | 0.0507044  |
| 869 | 10419261 | <a href="#">NM_007554</a>          | <a href="#">12159</a>     | bone morphogenetic protein 4   | <a href="#">Bmp4</a>               | 1.559 | 3.769 | 0.00661932  | 0.0504721  |

|     |          |                                    |                           |                                |                                    |       |       |             |            |
|-----|----------|------------------------------------|---------------------------|--------------------------------|------------------------------------|-------|-------|-------------|------------|
| 870 | 10368981 | <a href="#">NM_001031772</a>       | <a href="#">380669</a>    | lin-28 homolog B (C. elegans)  | <a href="#">Lin28b</a>             | 1.559 | 6.062 | 0.00045417  | 0.00756735 |
| 871 | 10398996 | <a href="#">NM_024223</a>          | <a href="#">68337</a>     | cysteine rich protein 2        | <a href="#">Crip2</a>              | 1.559 | 5.238 | 0.00109318  | 0.0139472  |
| 872 | 10413100 | <a href="#">NM_017479</a>          | <a href="#">54169</a>     | MYST histone acetyltransferase | <a href="#">Myst4</a>              | 1.559 | 6.764 | 0.000229087 | 0.00482451 |
| 873 | 10453231 | <a href="#">NM_011406</a>          | <a href="#">20541</a>     | solute carrier family 8 (sodi  | <a href="#">Slc8a1</a>             | 1.558 | 6.73  | 0.000236565 | 0.00493774 |
| 874 | 10483800 |                                    |                           |                                |                                    | 1.556 | 3.615 | 0.00813652  | 0.0586362  |
| 875 | 10392560 | <a href="#">NM_147220</a>          | <a href="#">217262</a>    | ATP-binding cassette, sub-fami | <a href="#">Abca9</a>              | 1.556 | 4.87  | 0.0016679   | 0.0188053  |
| 876 | 10607848 | <a href="#">NM_019397</a>          | <a href="#">54156</a>     | EGF-like-domain, multiple 6    | <a href="#">Egfl6</a>              | 1.556 | 2.189 | 0.0636781   | 0.234321   |
| 877 | 10355514 | <a href="#">BC055076</a>           | <a href="#">21961</a>     | tensin 1                       | <a href="#">Tns1</a>               | 1.555 | 8.502 | 5.19378e-05 | 0.0017944  |
| 878 | 10491885 | <a href="#">NM_001098171</a>       | <a href="#">18526</a>     | protocadherin 10               | <a href="#">Pcdh10</a>             | 1.555 | 6.807 | 0.000220012 | 0.00469892 |
| 879 | 10544002 | <a href="#">NM_178661</a>          | <a href="#">208647</a>    | cAMP responsive element bindin | <a href="#">Creb3l2</a>            | 1.553 | 4.37  | 0.00304845  | 0.0290606  |
| 880 | 10382890 | <a href="#">NM_028777</a>          | <a href="#">74136</a>     | SEC14-like 1 (S. cerevisiae)   | <a href="#">Sec14l1</a>            | 1.553 | 5.547 | 0.000778638 | 0.0110271  |
| 881 | 10391332 | <a href="#">NM_008986</a>          | <a href="#">19285</a>     | polymerase I and transcript re | <a href="#">Ptrf</a>               | 1.553 | 4.482 | 0.00265577  | 0.0265502  |
| 882 | 10577190 | <a href="#">NM_009025</a>          | <a href="#">19414</a>     | RAS p21 protein activator 3    | <a href="#">Rasa3</a>              | 1.553 | 8.517 | 5.13102e-05 | 0.00177562 |
| 883 | 10606694 | <a href="#">NM_013482</a>          | <a href="#">12229</a>     | Bruton agammaglobulinemia tyro | <a href="#">Btk</a>                | 1.551 | 7.13  | 0.000163785 | 0.00385642 |
| 884 | 10359762 | <a href="#">NM_178593</a>          | <a href="#">226594</a>    | RCSD domain containing 1       | <a href="#">Rcsd1</a>              | 1.55  | 5.921 | 0.00052481  | 0.00836215 |
| 885 | 10403604 | <a href="#">NM_010748</a>          | <a href="#">17101</a>     | lysosomal trafficking regulato | <a href="#">Lyst</a>               | 1.549 | 8.046 | 7.4726e-05  | 0.00227339 |
| 886 | 10544774 | <a href="#">NM_010454</a>          | <a href="#">15403</a>     | homeo box A6                   | <a href="#">Hoxa6</a>              | 1.549 | 3.966 | 0.00510552  | 0.041888   |
| 887 | 10453394 | <a href="#">NM_011380</a>          | <a href="#">20472</a>     | sine oculis-related homeobox 2 | <a href="#">Six2</a>               | 1.549 | 1.018 | 0.341518    | 0.616178   |
| 888 | 10558481 | <a href="#">NM_011993</a>          | <a href="#">26757</a>     | dihydropyrimidinase-like 4     | <a href="#">Dpysl4</a>             | 1.549 | 4.916 | 0.00157907  | 0.0180964  |
| 889 | 10593449 | <a href="#">BC139816</a>           | <a href="#">244864</a>    | layilin                        | <a href="#">Layn</a>               | 1.549 | 6.437 | 0.000312919 | 0.00586221 |
| 890 | 10397428 | <a href="#">BC048169</a>           | <a href="#">70373</a>     | RIKEN cDNA 1700020003 gene     | <a href="#">1700020003Rik</a>      | 1.548 | 3.388 | 0.0111263   | 0.0729652  |
| 891 | 10491599 |                                    |                           |                                |                                    | 1.548 | 1.618 | 0.148515    | 0.390852   |
| 892 | 10349634 |                                    |                           |                                |                                    | 1.548 | 3.129 | 0.0160137   | 0.0945266  |
| 893 | 10598757 | <a href="#">NM_175669</a>          | <a href="#">319200</a>    | G protein-coupled receptor 82  | <a href="#">Gpr82</a>              | 1.547 | 3.341 | 0.0118664   | 0.0762622  |
| 894 | 10566454 | <a href="#">NM_028444</a>          | <a href="#">109042</a>    | protein kinase C, delta bindin | <a href="#">Prkcdbp</a>            | 1.547 | 5.607 | 0.000729929 | 0.010573   |
| 895 | 10553833 | <a href="#">NM_010882</a>          | <a href="#">17984</a>     | neccin                         | <a href="#">Ndn</a>                | 1.547 | 7.643 | 0.000104506 | 0.00286229 |
| 896 | 10595392 | <a href="#">NM_148941</a>          | <a href="#">83603</a>     | elongation of very long chain  | <a href="#">Elov14</a>             | 1.546 | 2.568 | 0.0361851   | 0.162407   |
| 897 | 10452907 | <a href="#">NM_199448</a>          | <a href="#">225020</a>    | fasciculation and elongation p | <a href="#">Fez2</a>               | 1.546 | 6.352 | 0.000340015 | 0.00617891 |
| 898 | 10366645 | <a href="#">ENSMUST00000041178</a> | <a href="#">321010</a>    | RIKEN cDNA 1700006J14 gene     | <a href="#">1700006J14Rik</a>      | 1.546 | 6.304 | 0.000356516 | 0.00637209 |
| 899 | 10523766 | <a href="#">NM_133897</a>          | <a href="#">100604</a>    | leucine rich repeat containing | <a href="#">Ltrc8c</a>             | 1.544 | 6.365 | 0.000335624 | 0.00611645 |
| 900 | 10532753 | <a href="#">NM_011779</a>          | <a href="#">23790</a>     | coronin, actin binding protein | <a href="#">Coro1c</a>             | 1.544 | 4.404 | 0.00292474  | 0.028306   |
| 901 | 10407709 | <a href="#">NM_001081128</a>       | <a href="#">238505</a>    | 5-methyltetrahydrofolate-homoc | <a href="#">Mtr</a>                | 1.543 | 4.756 | 0.0019065   | 0.0208649  |
| 902 | 10455942 | <a href="#">BC075669</a>           | <a href="#">225583</a>    | RIKEN cDNA A730017C20 gene     | <a href="#">A730017C20Rik</a>      | 1.543 | 2.048 | 0.0786376   | 0.266888   |
| 903 | 10487011 | <a href="#">NM_025961</a>          | <a href="#">67092</a>     | glycine amidinotransferase (L- | <a href="#">Gatm</a>               | 1.543 | 3.389 | 0.011097    | 0.0728453  |
| 904 | 10563077 | <a href="#">NM_026555</a>          | <a href="#">52377</a>     | reticulocalbin 3, EF-hand calc | <a href="#">Rcn3</a>               | 1.542 | 4.731 | 0.00196494  | 0.0212971  |
| 905 | 10527799 | <a href="#">AK041221</a>           | <a href="#">100093622</a> | predicted gene, ENSMUSG0000007 | <a href="#">ENSMUSG00000075527</a> | 1.542 | 3.513 | 0.00936054  | 0.0647854  |
| 906 | 10392388 | <a href="#">NM_011101</a>          | <a href="#">18750</a>     | protein kinase C, alpha        | <a href="#">Prkca</a>              | 1.541 | 4.275 | 0.00343244  | 0.0314044  |
| 907 | 10452571 | <a href="#">NM_008984</a>          | <a href="#">19274</a>     | protein tyrosine phosphatase,  | <a href="#">Ptpm</a>               | 1.541 | 4.218 | 0.00368901  | 0.033051   |
| 908 | 10358672 | <a href="#">NM_001024720</a>       | <a href="#">545370</a>    | hemicentin 1                   | <a href="#">Hmen1</a>              | 1.54  | 4     | 0.00488138  | 0.0405548  |
| 909 | 10447341 | <a href="#">NM_145491</a>          | <a href="#">104215</a>    | ras homolog gene family, membe | <a href="#">Rhoq</a>               | 1.538 | 4.783 | 0.0018468   | 0.0203462  |
| 910 | 10562500 | <a href="#">NM_178704</a>          | <a href="#">233115</a>    | dpy-19-like 3 (C. elegans)     | <a href="#">Dpy19l3</a>            | 1.537 | 6.143 | 0.000418617 | 0.00716699 |
| 911 | 10387368 | <a href="#">NM_025915</a>          | <a href="#">67020</a>     | transmembrane protein 88       | <a href="#">Tmem88</a>             | 1.537 | 7.43  | 0.000125579 | 0.00321848 |
| 912 | 10457587 | <a href="#">NM_145492</a>          | <a href="#">225207</a>    | zinc finger protein 521        | <a href="#">Zfp521</a>             | 1.536 | 6.744 | 0.000233382 | 0.00489349 |
| 913 | 10560190 | <a href="#">NM_153068</a>          | <a href="#">259300</a>    | EH-domain containing 2         | <a href="#">Ehd2</a>               | 1.535 | 5.295 | 0.00102643  | 0.0133885  |
| 914 | 10592515 | <a href="#">NM_176860</a>          | <a href="#">72828</a>     | ubiquitin associated and SH3 d | <a href="#">Ubash3b</a>            | 1.535 | 5.569 | 0.000760019 | 0.0108507  |
| 915 | 10427898 | <a href="#">NM_176959</a>          | <a href="#">448987</a>    | F-box and leucine-rich repeat  | <a href="#">Fbxl7</a>              | 1.534 | 3.219 | 0.014099    | 0.0862835  |
| 916 | 10362717 | <a href="#">NM_031877</a>          | <a href="#">83767</a>     | WASP family 1                  | <a href="#">Wasf1</a>              | 1.534 | 5.178 | 0.00116934  | 0.0147079  |
| 917 | 10395320 | <a href="#">NM_011658</a>          | <a href="#">22160</a>     | twist gene homolog 1 (Drosophi | <a href="#">Twist1</a>             | 1.534 | 3.344 | 0.0118273   | 0.0761033  |
| 918 | 10541075 | <a href="#">NM_001012477</a>       | <a href="#">20315</a>     | chemokine (C-X-C motif) ligand | <a href="#">Cxcl12</a>             | 1.534 | 5.242 | 0.00108922  | 0.0139352  |
| 919 | 10427918 | <a href="#">BC052328</a>           | <a href="#">223433</a>    | cDNA sequence BC052328         | <a href="#">BC052328</a>           | 1.533 | 6.905 | 0.00020098  | 0.00442197 |
| 920 | 10385635 | <a href="#">NM_013922</a>          | <a href="#">30944</a>     | zinc finger protein 354C       | <a href="#">Zfp354c</a>            | 1.533 | 7.975 | 7.91907e-05 | 0.00236365 |
| 921 | 10515986 | <a href="#">NM_001005788</a>       | <a href="#">381549</a>    | zinc finger protein 69         | <a href="#">Zfp69</a>              | 1.533 | 7.127 | 0.000164124 | 0.00386011 |
| 922 | 10497994 | <a href="#">NM_001101479</a>       | <a href="#">241989</a>    | poly(A) binding protein, cytop | <a href="#">Pabpc4l</a>            | 1.532 | 6.054 | 0.000458028 | 0.00760508 |

|     |          |                              |                           |                                   |                                    |       |       |             |            |
|-----|----------|------------------------------|---------------------------|-----------------------------------|------------------------------------|-------|-------|-------------|------------|
| 923 | 10605616 | <a href="#">BC119580</a>     | <a href="#">331461</a>    | interleukin 1 receptor accesso    | <a href="#">Il1rap1</a>            | 1.53  | 1.481 | 0.180841    | 0.436777   |
| 924 | 10417787 | <a href="#">NM_010315</a>    | <a href="#">14702</a>     | guanine nucleotide binding pro    | <a href="#">Gng2</a>               | 1.53  | 7.858 | 8.72398e-05 | 0.00255485 |
| 925 | 10358713 | <a href="#">BC022177</a>     | <a href="#">100038553</a> | predicted gene,<br>ENSMUSG0000007 | <a href="#">ENSMUSG00000073540</a> | 1.529 | 3.986 | 0.00496862  | 0.0411019  |
| 926 | 10447461 | <a href="#">NM_029858</a>    | <a href="#">77057</a>     | stonin 1                          | <a href="#">Ston1</a>              | 1.529 | 5.791 | 0.000600526 | 0.00921618 |
| 927 | 10548105 | <a href="#">NM_009829</a>    | <a href="#">12444</a>     | cyclin D2                         | <a href="#">Cend2</a>              | 1.529 | 6.281 | 0.000364552 | 0.00647739 |
| 928 | 10591129 | <a href="#">NM_001080814</a> | <a href="#">270120</a>    | FAT tumor suppressor homolog 3    | <a href="#">Fat3</a>               | 1.528 | 2.602 | 0.0344008   | 0.157065   |
| 929 | 10357115 | <a href="#">NM_001081316</a> | <a href="#">319901</a>    | dermatan sulfate epimerase-lik    | <a href="#">Dsel</a>               | 1.527 | 6.625 | 0.00026113  | 0.0052421  |
| 930 | 10594645 | <a href="#">NM_173413</a>    | <a href="#">235442</a>    | RAB8B, member RAS oncogene fam    | <a href="#">Rab8b</a>              | 1.527 | 9.554 | 2.37979e-05 | 0.00105048 |
| 931 | 10582388 |                              |                           |                                   |                                    | 1.526 | 1.247 | 0.251312    | 0.525436   |
| 932 | 10555510 | <a href="#">NM_001008548</a> | <a href="#">207728</a>    | phosphodiesterase 2A, cGMP-sti    | <a href="#">Pde2a</a>              | 1.525 | 8.928 | 3.75017e-05 | 0.00142276 |
| 933 | 10518069 | <a href="#">NM_025994</a>    | <a href="#">27984</a>     | EF hand domain containing 2       | <a href="#">Efhd2</a>              | 1.524 | 5.371 | 0.000943127 | 0.0126089  |
| 934 | 10601701 | <a href="#">NM_026239</a>    | <a href="#">67564</a>     | transmembrane protein 35          | <a href="#">Tmem35</a>             | 1.524 | 5.91  | 0.000530729 | 0.00844374 |
| 935 | 10522060 | <a href="#">NM_026667</a>    | <a href="#">68303</a>     | RIKEN cDNA 9130005N14 gene        | <a href="#">9130005N14Rik</a>      | 1.524 | 3.895 | 0.00560381  | 0.0448814  |
| 936 | 10475990 | <a href="#">NM_015747</a>    | <a href="#">20515</a>     | solute carrier family 20, memb    | <a href="#">Slc20a1</a>            | 1.522 | 5.489 | 0.000828985 | 0.011524   |
| 937 | 10559766 | <a href="#">NM_001033249</a> | <a href="#">213011</a>    | zinc finger protein 583           | <a href="#">Zfp583</a>             | 1.521 | 6.688 | 0.00024611  | 0.0050424  |
| 938 | 10441680 | <a href="#">NM_011866</a>    | <a href="#">23984</a>     | phosphodiesterase 10A             | <a href="#">Pde10a</a>             | 1.521 | 6.153 | 0.000414281 | 0.00713294 |
| 939 | 10455084 | <a href="#">NM_053135</a>    | <a href="#">93881</a>     | protocadherin beta 10             | <a href="#">Pcdhb10</a>            | 1.521 | 3.234 | 0.0138037   | 0.0851165  |
| 940 | 10576046 | <a href="#">NM_010426</a>    | <a href="#">15227</a>     | forkhead box F1a                  | <a href="#">Foxf1a</a>             | 1.521 | 5.885 | 0.000544804 | 0.00859115 |
| 941 | 10493831 | <a href="#">NM_013650</a>    | <a href="#">20201</a>     | S100 calcium binding protein A    | <a href="#">S100a8</a>             | 1.519 | 2.528 | 0.0384301   | 0.169439   |
| 942 | 10541564 | <a href="#">NM_153197</a>    | <a href="#">73149</a>     | C-type lectin domain family 4,    | <a href="#">Clec4a3</a>            | 1.519 | 3.885 | 0.00567504  | 0.0452369  |
| 943 | 10426315 | <a href="#">NM_025730</a>    | <a href="#">66725</a>     | leucine-rich repeat kinase 2      | <a href="#">Lrrk2</a>              | 1.518 | 6.929 | 0.000196616 | 0.00435315 |
| 944 | 10439651 | <a href="#">NM_010818</a>    | <a href="#">17470</a>     | Cd200 antigen                     | <a href="#">Cd200</a>              | 1.518 | 4.396 | 0.00295367  | 0.0284299  |
| 945 | 10455123 | <a href="#">NM_053144</a>    | <a href="#">93890</a>     | protocadherin beta 19             | <a href="#">Pcdhb19</a>            | 1.518 | 2.224 | 0.0603756   | 0.226645   |
| 946 | 10372648 | <a href="#">NM_017372</a>    | <a href="#">17105</a>     | lysozyme 2                        | <a href="#">Lyz2</a>               | 1.517 | 4.466 | 0.00270918  | 0.0269567  |
| 947 | 10351347 | <a href="#">NM_011804</a>    | <a href="#">433375</a>    | cellular repressor of E1A-stim    | <a href="#">Creg1</a>              | 1.517 | 4.075 | 0.00443225  | 0.0375764  |
| 948 | 10606259 |                              |                           |                                   |                                    | 1.517 | 3.517 | 0.00930495  | 0.0645485  |
| 949 | 10443980 | <a href="#">NM_053214</a>    | <a href="#">17916</a>     | myosin IF                         | <a href="#">Myo1f</a>              | 1.517 | 4.364 | 0.00307262  | 0.0291595  |
| 950 | 10495416 | <a href="#">NM_020505</a>    | <a href="#">57257</a>     | vav 3 oncogene                    | <a href="#">Vav3</a>               | 1.516 | 4.627 | 0.00222436  | 0.0234807  |
| 951 | 10423258 | <a href="#">NM_001008420</a> | <a href="#">215654</a>    | cadherin 12                       | <a href="#">Cdh12</a>              | 1.515 | 3.167 | 0.0151691   | 0.0910404  |
| 952 | 10471486 | <a href="#">NM_007932</a>    | <a href="#">13805</a>     | endoglin                          | <a href="#">Eng</a>                | 1.514 | 6.875 | 0.000206571 | 0.00452616 |
| 953 | 10427816 | <a href="#">NM_001081064</a> | <a href="#">68070</a>     | PDZ domain containing 2           | <a href="#">Pdzd2</a>              | 1.514 | 5.493 | 0.000825542 | 0.0114989  |
| 954 | 10521678 | <a href="#">NM_007646</a>    | <a href="#">12494</a>     | CD38 antigen                      | <a href="#">Cd38</a>               | 1.514 | 4.023 | 0.00473905  | 0.0396916  |
| 955 | 10499189 | <a href="#">NM_030707</a>    | <a href="#">80891</a>     | Fc receptor-like S, scavenger     | <a href="#">Fcr1s</a>              | 1.513 | 2.453 | 0.042914    | 0.181802   |
| 956 | 10466210 | <a href="#">NM_026835</a>    | <a href="#">68774</a>     | membrane-spanning 4-domains, s    | <a href="#">Ms4a6d</a>             | 1.512 | 3.367 | 0.0114475   | 0.074384   |
| 957 | 10605493 | <a href="#">BC032926</a>     | <a href="#">546336</a>    | proline rich Gla (G-carboxyglu    | <a href="#">Prrg1</a>              | 1.512 | 4.041 | 0.00463105  | 0.0389494  |
| 958 | 10546725 | <a href="#">NM_018884</a>    | <a href="#">55983</a>     | PDZ domain containing RING fin    | <a href="#">Pdzrn3</a>             | 1.512 | 5.467 | 0.000849013 | 0.011672   |
| 959 | 10605792 | <a href="#">NM_178753</a>    | <a href="#">270624</a>    | spindlin family, member 4         | <a href="#">Spin4</a>              | 1.511 | 6.072 | 0.000449571 | 0.00752035 |
| 960 | 10404982 | <a href="#">NM_007526</a>    | <a href="#">12022</a>     | BarH-like homeobox 1              | <a href="#">Barx1</a>              | 1.511 | 3.172 | 0.0150583   | 0.0906069  |
| 961 | 10600852 |                              |                           |                                   |                                    | 1.51  | 5.903 | 0.000534329 | 0.00848188 |
| 962 | 10498284 | <a href="#">NM_133784</a>    | <a href="#">97064</a>     | WW domain containing transcrip    | <a href="#">Wwtr1</a>              | 1.509 | 3.83  | 0.00609919  | 0.0474981  |
| 963 | 10475414 | <a href="#">NM_009735</a>    | <a href="#">12010</a>     | beta-2 microglobulin              | <a href="#">B2m</a>                | 1.509 | 5.429 | 0.000885562 | 0.0120182  |
| 964 | 10531187 | <a href="#">NM_001081401</a> | <a href="#">330119</a>    | a disintegrin-like and metallo    | <a href="#">Adamts3</a>            | 1.508 | 6.097 | 0.00043841  | 0.00738884 |
| 965 | 10472408 | <a href="#">NM_153409</a>    | <a href="#">77771</a>     | cysteine-serine-rich nuclear p    | <a href="#">Csnrp3</a>             | 1.507 | 8.291 | 6.1302e-05  | 0.00200098 |
| 966 | 10367591 | <a href="#">NM_026793</a>    | <a href="#">68632</a>     | myc target 1                      | <a href="#">Myet1</a>              | 1.507 | 4.069 | 0.00446707  | 0.037811   |
| 967 | 10351905 | <a href="#">NM_011465</a>    | <a href="#">20739</a>     | spectrin alpha 1                  | <a href="#">Spna1</a>              | 1.506 | 1.756 | 0.121254    | 0.347823   |
| 968 | 10605181 | <a href="#">NM_023132</a>    | <a href="#">19703</a>     | renin binding protein             | <a href="#">Renbp</a>              | 1.505 | 3.39  | 0.0110937   | 0.0728453  |
| 969 | 10492310 | <a href="#">NM_020007</a>    | <a href="#">56758</a>     | muscleblind-like 1 (Drosophila    | <a href="#">Mbnl1</a>              | 1.504 | 8.78  | 4.19352e-05 | 0.00154473 |
| 970 | 10568298 | <a href="#">NM_024414</a>    | <a href="#">56216</a>     | syntaxin 1B                       | <a href="#">Stx1b</a>              | 1.504 | 6.774 | 0.000226827 | 0.0047976  |
| 971 | 10372385 | <a href="#">NM_172554</a>    | <a href="#">320150</a>    | zinc finger, DHHC domain conta    | <a href="#">Zdhhc17</a>            | 1.503 | 5.95  | 0.00050895  | 0.00819592 |
| 972 | 10430555 | <a href="#">NM_010059</a>    | <a href="#">13404</a>     | DMC1 dosage suppressor of mck1    | <a href="#">Dmc1</a>               | 1.503 | 6.61  | 0.000264885 | 0.00528661 |
| 973 | 10349081 | <a href="#">BC059254</a>     | <a href="#">98432</a>     | PH domain and leucine rich rep    | <a href="#">Phlpp</a>              | 1.503 | 4.107 | 0.00425399  | 0.0365189  |
|     |          |                              |                           | MARVEL1 (membrane-                |                                    |       |       |             |            |

|      |          |                                    |                           |                                   |                                    |       |       |             |            |
|------|----------|------------------------------------|---------------------------|-----------------------------------|------------------------------------|-------|-------|-------------|------------|
| 974  | 10463224 | <a href="#">BC054384</a>           | <a href="#">277010</a>    | associating)                      | <a href="#">Marveld1</a>           | 1.502 | 7.496 | 0.000118613 | 0.00311159 |
| 975  | 10361509 | <a href="#">NM_001079686</a>       | <a href="#">64009</a>     | synaptic nuclear envelope 1       | <a href="#">Syne1</a>              | 1.502 | 4.027 | 0.0047112   | 0.0395292  |
| 976  | 10505120 | <a href="#">NM_172868</a>          | <a href="#">242481</a>    | paralemmin 2                      | <a href="#">Palm2</a>              | 1.502 | 1.573 | 0.158389    | 0.405262   |
| 977  | 10485633 | <a href="#">ENSMUST00000099651</a> | <a href="#">100038694</a> | predicted gene,<br>ENSMUSG0000007 | <a href="#">ENSMUSG00000074989</a> | 1.5   | 2.155 | 0.0669341   | 0.241635   |
| 978  | 10436561 | <a href="#">NM_013918</a>          | <a href="#">30940</a>     | ubiquitin specific peptidase 2    | <a href="#">Usp25</a>              | 1.498 | 7.302 | 0.000140405 | 0.00344552 |
| 979  | 10579744 | <a href="#">NM_010687</a>          | <a href="#">16795</a>     | like-glycosyltransferase          | <a href="#">Large</a>              | 1.498 | 8.292 | 6.12758e-05 | 0.00200098 |
| 980  | 10601354 |                                    |                           |                                   |                                    | 1.497 | 0.954 | 0.37118     | 0.641982   |
| 981  | 10569618 | <a href="#">NM_178642</a>          | <a href="#">101772</a>    | transmembrane protein 16A         | <a href="#">Tmem16a</a>            | 1.497 | 2.946 | 0.0207968   | 0.112896   |
| 982  | 10472364 | <a href="#">NM_001099298</a>       | <a href="#">110876</a>    | sodium channel, voltage-gated,    | <a href="#">Scn2a1</a>             | 1.496 | 2.534 | 0.0380843   | 0.168569   |
| 983  | 10472436 | <a href="#">NM_020283</a>          | <a href="#">26877</a>     | UDP-Gal:betaGlcNAc beta 1,3-ga    | <a href="#">B3galt1</a>            | 1.496 | 4.552 | 0.00243641  | 0.0249954  |
| 984  | 10523802 | <a href="#">NM_009863</a>          | <a href="#">12545</a>     | cell division cycle 7 (S. cere    | <a href="#">Cdc7</a>               | 1.495 | 7.363 | 0.000133117 | 0.00333883 |
| 985  | 10406598 | <a href="#">NM_172588</a>          | <a href="#">218442</a>    | serine incorporator 5             | <a href="#">Serinc5</a>            | 1.494 | 4.406 | 0.00291424  | 0.0282784  |
| 986  | 10554074 | <a href="#">NM_001033877</a>       | <a href="#">233332</a>    | a disintegrin-like and metallo    | <a href="#">Adamts17</a>           | 1.493 | 2.866 | 0.0233848   | 0.121516   |
| 987  | 10480324 | <a href="#">NM_028317</a>          | <a href="#">72668</a>     | RIKEN cDNA 2810030E01 gene        | <a href="#">2810030E01Rik</a>      | 1.492 | 6.89  | 0.000203662 | 0.00447168 |
| 988  | 10421293 | <a href="#">NM_008915</a>          | <a href="#">19057</a>     | protein phosphatase 3, catalyt    | <a href="#">Ppp3cc</a>             | 1.492 | 4.952 | 0.00151487  | 0.0175413  |
| 989  | 10384579 | <a href="#">NM_139297</a>          | <a href="#">216558</a>    | UDP-glucose pyrophosphorylase     | <a href="#">Ugp2</a>               | 1.492 | 5.524 | 0.000797979 | 0.0112109  |
| 990  | 10431711 | <a href="#">NM_001033633</a>       | <a href="#">239606</a>    | solute carrier family 2 (facil    | <a href="#">Slc2a13</a>            | 1.49  | 4.336 | 0.00318228  | 0.0298651  |
| 991  | 10474096 | <a href="#">NM_178725</a>          | <a href="#">241568</a>    | leucine rich repeat containing    | <a href="#">Lrrc4c</a>             | 1.49  | 3.561 | 0.00876053  | 0.061806   |
| 992  | 10537184 | <a href="#">NM_145575</a>          | <a href="#">109624</a>    | caldesmon 1                       | <a href="#">Cald1</a>              | 1.49  | 3.163 | 0.0152507   | 0.0914142  |
| 993  | 10601616 | <a href="#">NM_017398</a>          | <a href="#">54004</a>     | diaphanous homolog 2 (Drosophi    | <a href="#">Diap2</a>              | 1.489 | 4.41  | 0.0029004   | 0.02817    |
| 994  | 10361246 | <a href="#">NM_008059</a>          | <a href="#">14373</a>     | G0/G1 switch gene 2               | <a href="#">G0s2</a>               | 1.489 | 7.774 | 9.35501e-05 | 0.00267301 |
| 995  | 10508012 | <a href="#">NM_138683</a>          | <a href="#">192199</a>    | R-spondin homolog (Xenopus lae    | <a href="#">Rspo1</a>              | 1.489 | 3.378 | 0.0112808   | 0.0735307  |
| 996  | 10376144 | <a href="#">NM_173753</a>          | <a href="#">216742</a>    | folliculin interacting protein    | <a href="#">Fnip1</a>              | 1.488 | 4.463 | 0.00271928  | 0.0270061  |
| 997  | 10485840 | <a href="#">NM_177652</a>          | <a href="#">20192</a>     | ryanodine receptor 3              | <a href="#">Ryr3</a>               | 1.488 | 4.839 | 0.00172869  | 0.0193189  |
| 998  | 10514275 | <a href="#">NM_025760</a>          | <a href="#">66775</a>     | protein tyrosine phosphatase-1    | <a href="#">Ptplad2</a>            | 1.487 | 2.809 | 0.0253774   | 0.128707   |
| 999  | 10404774 | <a href="#">NM_007772</a>          | <a href="#">110521</a>    | human immunodeficiency virus t    | <a href="#">Hivp1</a>              | 1.487 | 6.597 | 0.000268191 | 0.00532453 |
| 1000 | 10439138 | <a href="#">ENSMUST00000076810</a> | <a href="#">545156</a>    | kalirin, RhoGEF kinase            | <a href="#">Kalrn</a>              | 1.487 | 5.487 | 0.000830994 | 0.0115242  |
| 1001 | 10530633 | <a href="#">NM_011890</a>          | <a href="#">24051</a>     | sarcoglycan, beta (dystrophin-    | <a href="#">Sgcb</a>               | 1.486 | 2.74  | 0.0281044   | 0.137533   |
| 1002 | 10400155 | <a href="#">ENSMUST00000066043</a> | <a href="#">664883</a>    | neuro-oncological ventral anti    | <a href="#">Nova1</a>              | 1.486 | 4.941 | 0.00153396  | 0.0177042  |
| 1003 | 10499811 | <a href="#">NM_008727</a>          | <a href="#">18160</a>     | natriuretic peptide receptor 1    | <a href="#">Npr1</a>               | 1.486 | 3.71  | 0.00715772  | 0.0535159  |
| 1004 | 10349947 | <a href="#">NM_021355</a>          | <a href="#">14264</a>     | fibromodulin                      | <a href="#">Fmod</a>               | 1.486 | 4.445 | 0.00277964  | 0.0273999  |
| 1005 | 10366983 | <a href="#">NM_001113211</a>       | <a href="#">210035</a>    | transmembrane protein 194         | <a href="#">Tmem194</a>            | 1.485 | 5.164 | 0.00118875  | 0.0148816  |
| 1006 | 10491960 |                                    |                           |                                   |                                    | 1.484 | 2.909 | 0.0219604   | 0.11652    |
| 1007 | 10380174 | <a href="#">NM_010824</a>          | <a href="#">17523</a>     | myeloperoxidase                   | <a href="#">Mpo</a>                | 1.484 | 7.317 | 0.000138672 | 0.00342132 |
| 1008 | 10385966 | <a href="#">NM_013472</a>          | <a href="#">11749</a>     | annexin A6                        | <a href="#">Anxa6</a>              | 1.484 | 3.831 | 0.00609576  | 0.0474904  |
| 1009 | 10575213 | <a href="#">NM_007496</a>          | <a href="#">11906</a>     | zinc finger homeobox 3            | <a href="#">Zfx3</a>               | 1.484 | 6.809 | 0.000219708 | 0.00469892 |
| 1010 | 10572786 | <a href="#">NM_007456</a>          | <a href="#">11767</a>     | adaptor-related protein comple    | <a href="#">Ap1m1</a>              | 1.483 | 6.455 | 0.000307627 | 0.00580546 |
| 1011 | 10512022 | <a href="#">ENSMUST00000098156</a> | <a href="#">214944</a>    | MOB1, Mps One Binder kinase ac    | <a href="#">Mobk12b</a>            | 1.483 | 3.335 | 0.0119798   | 0.0767115  |
| 1012 | 10346072 |                                    |                           |                                   |                                    | 1.483 | 4.513 | 0.00255626  | 0.0257993  |
| 1013 | 10506201 | <a href="#">NM_013845</a>          | <a href="#">26563</a>     | receptor tyrosine kinase-like     | <a href="#">Ror1</a>               | 1.483 | 4.215 | 0.00370467  | 0.0331492  |
| 1014 | 10583326 | <a href="#">NM_172289</a>          | <a href="#">234967</a>    | solute carrier family 36 (prot    | <a href="#">Slc36a4</a>            | 1.482 | 2.957 | 0.0204924   | 0.111933   |
| 1015 | 10440019 | <a href="#">NM_019631</a>          | <a href="#">56277</a>     | transmembrane protein 45a         | <a href="#">Tmem45a</a>            | 1.482 | 3.224 | 0.0139914   | 0.0858692  |
| 1016 | 10442087 | <a href="#">ENSMUST00000052338</a> | <a href="#">75202</a>     | RIKEN cDNA 4930546H06 gene        | <a href="#">4930546H06Rik</a>      | 1.482 | 5.791 | 0.000600638 | 0.00921618 |
| 1017 | 10527936 | <a href="#">NM_021457</a>          | <a href="#">14362</a>     | frizzled homolog 1 (Drosophila    | <a href="#">Fzd1</a>               | 1.481 | 4.999 | 0.00143448  | 0.0168502  |
| 1018 | 10569707 | <a href="#">NM_001093765</a>       | <a href="#">50918</a>     | myeloid-associated differentia    | <a href="#">Myadm</a>              | 1.48  | 5.854 | 0.000562107 | 0.0088169  |
| 1019 | 10554059 | <a href="#">ENSMUST00000098385</a> | <a href="#">100038588</a> | predicted gene,<br>ENSMUSG0000007 | <a href="#">ENSMUSG00000074077</a> | 1.48  | 2.536 | 0.0379469   | 0.168193   |
| 1020 | 10412267 | <a href="#">NM_008396</a>          | <a href="#">16398</a>     | integrin alpha 2                  | <a href="#">Itga2</a>              | 1.479 | 6.078 | 0.000446997 | 0.00748914 |
| 1021 | 10455139 | <a href="#">NM_053147</a>          | <a href="#">93893</a>     | protocadherin beta 22             | <a href="#">Pcdhb22</a>            | 1.479 | 4.995 | 0.00144093  | 0.0168793  |
| 1022 | 10445944 | <a href="#">NM_172829</a>          | <a href="#">240119</a>    | beta galactoside alpha 2,6 sia    | <a href="#">St6gal2</a>            | 1.479 | 2.862 | 0.0235199   | 0.122008   |
| 1023 | 10492136 | <a href="#">NM_019978</a>          | <a href="#">13175</a>     | doublecortin-like kinase 1        | <a href="#">Delk1</a>              | 1.477 | 5.344 | 0.000972049 | 0.0128559  |
| 1024 | 10543145 | <a href="#">ENSMUST00000046121</a> | <a href="#">330267</a>    | thrombospondin, type I, domain    | <a href="#">Thsd7a</a>             | 1.477 | 3.915 | 0.0054562   | 0.043998   |
| 1025 | 10402268 | <a href="#">NM_011175</a>          | <a href="#">19141</a>     | legumain                          | <a href="#">Lgmn</a>               | 1.476 | 3.513 | 0.00935667  | 0.0647798  |

|      |          |                                    |                           |                                |                                    |       |       |             |            |
|------|----------|------------------------------------|---------------------------|--------------------------------|------------------------------------|-------|-------|-------------|------------|
| 1026 | 10568568 | <a href="#">NM_016978</a>          | <a href="#">18242</a>     | ornithine aminotransferase     | <a href="#">Oat</a>                | 1.476 | 4.752 | 0.00191656  | 0.0209391  |
| 1027 | 10440186 | <a href="#">BC043118</a>           | <a href="#">224273</a>    | cDNA sequence BC043118         | <a href="#">BC043118</a>           | 1.476 | 4.621 | 0.00224266  | 0.0236267  |
| 1028 | 10432439 | <a href="#">NM_011711</a>          | <a href="#">22379</a>     | formin-like 3                  | <a href="#">Fmn3</a>               | 1.475 | 5.568 | 0.000761308 | 0.0108617  |
| 1029 | 10436865 | <a href="#">NM_008338</a>          | <a href="#">15980</a>     | interferon gamma receptor 2    | <a href="#">Ifngr2</a>             | 1.475 | 3.751 | 0.00678297  | 0.0513311  |
| 1030 | 10556082 | <a href="#">NM_008905</a>          | <a href="#">19024</a>     | protein tyrosine phosphatase,  | <a href="#">Ppfbp2</a>             | 1.475 | 4.384 | 0.00299716  | 0.028736   |
| 1031 | 10436636 | <a href="#">NM_001113208</a>       | <a href="#">17968</a>     | neural cell adhesion molecule  | <a href="#">Ncam2</a>              | 1.475 | 3.528 | 0.00916343  | 0.063776   |
| 1032 | 10548047 | <a href="#">NM_010595</a>          | <a href="#">16485</a>     | potassium voltage-gated channe | <a href="#">Kcna1</a>              | 1.475 | 4.404 | 0.00292388  | 0.028306   |
| 1033 | 10457118 | <a href="#">NM_175542</a>          | <a href="#">246102</a>    | rotatin                        | <a href="#">Rtn</a>                | 1.474 | 7.952 | 8.06976e-05 | 0.00239308 |
| 1034 | 10474860 | <a href="#">NM_028117</a>          | <a href="#">72136</a>     | carbohydrate (N-acetylgalactos | <a href="#">Chst14</a>             | 1.473 | 6.722 | 0.000238278 | 0.0049588  |
| 1035 | 10371400 | <a href="#">NM_007771</a>          | <a href="#">12952</a>     | cryptochrome 1 (photolyase-lik | <a href="#">Cry1</a>               | 1.472 | 4.506 | 0.00257865  | 0.0259757  |
| 1036 | 10500555 | <a href="#">NM_001012306</a>       | <a href="#">15494</a>     | hydroxy-delta-5-steroid dehydr | <a href="#">Hsd3b3</a>             | 1.471 | 4.151 | 0.00401752  | 0.0350874  |
| 1037 | 10601848 | <a href="#">NR_003641</a>          | <a href="#">76219</a>     | RIKEN cDNA 6530401D17 gene     | <a href="#">6530401D17Rik</a>      | 1.47  | 4.539 | 0.00247646  | 0.0252835  |
| 1038 | 10480035 | <a href="#">NM_133232</a>          | <a href="#">170768</a>    | 6-phosphofructo-2-kinase/fruct | <a href="#">Pfkfb3</a>             | 1.47  | 2.909 | 0.0219699   | 0.116541   |
| 1039 | 10530319 | <a href="#">NM_001038999</a>       | <a href="#">11980</a>     | ATPase, aminophospholipid tran | <a href="#">Atp8a1</a>             | 1.47  | 4.463 | 0.00271672  | 0.0270061  |
| 1040 | 10418506 | <a href="#">NM_138672</a>          | <a href="#">192187</a>    | stabilin 1                     | <a href="#">Stab1</a>              | 1.47  | 8.353 | 5.83811e-05 | 0.00192576 |
| 1041 | 10417068 |                                    |                           |                                |                                    | 1.47  | 1.778 | 0.117347    | 0.341384   |
| 1042 | 10578264 | <a href="#">NM_031195</a>          | <a href="#">20288</a>     | macrophage scavenger receptor  | <a href="#">Msrl</a>               | 1.469 | 4.572 | 0.00237725  | 0.0246033  |
| 1043 | 10462363 | <a href="#">NM_008413</a>          | <a href="#">16452</a>     | Janus kinase 2                 | <a href="#">Jak2</a>               | 1.468 | 5.071 | 0.00132168  | 0.016024   |
| 1044 | 10607259 | <a href="#">NM_001002272</a>       | <a href="#">56191</a>     | trophinin                      | <a href="#">Tro</a>                | 1.468 | 5.057 | 0.00134176  | 0.0162022  |
| 1045 | 10598240 | <a href="#">NM_001040459</a>       | <a href="#">208431</a>    | shroom family member 4         | <a href="#">Shroom4</a>            | 1.467 | 6.785 | 0.000224639 | 0.00476405 |
| 1046 | 10536611 | <a href="#">NM_019697</a>          | <a href="#">16508</a>     | potassium voltage-gated channe | <a href="#">Kcnd2</a>              | 1.467 | 6.302 | 0.000357183 | 0.00637862 |
| 1047 | 10525016 | <a href="#">NM_011535</a>          | <a href="#">21386</a>     | T-box 3                        | <a href="#">Tbx3</a>               | 1.466 | 5.828 | 0.000577687 | 0.00896919 |
| 1048 | 10548879 | <a href="#">NM_008597</a>          | <a href="#">17313</a>     | matrix Gla protein             | <a href="#">Mgp</a>                | 1.466 | 1.113 | 0.301503    | 0.577839   |
| 1049 | 10403255 | <a href="#">XM_001472410</a>       | <a href="#">100039182</a> | similar to cyclin-dependent ki | <a href="#">LOC100039182</a>       | 1.466 | 2.554 | 0.036925    | 0.164748   |
| 1050 | 10437205 | <a href="#">NM_008791</a>          | <a href="#">18546</a>     | Purkinje cell protein 4        | <a href="#">Pcp4</a>               | 1.465 | 2.92  | 0.0216037   | 0.11535    |
| 1051 | 10422942 |                                    |                           |                                |                                    | 1.464 | 0.81  | 0.443698    | 0.702422   |
| 1052 | 10554752 | <a href="#">NM_015760</a>          | <a href="#">50490</a>     | NADPH oxidase 4                | <a href="#">Nox4</a>               | 1.463 | 2.159 | 0.0665838   | 0.241111   |
| 1053 | 10475229 | <a href="#">ENSMUST00000094652</a> | <a href="#">668880</a>    | START domain containing 9      | <a href="#">Stard9</a>             | 1.463 | 5.99  | 0.000488664 | 0.00796631 |
| 1054 | 10511333 | <a href="#">NM_019969</a>          | <a href="#">56711</a>     | pleiomorphic adenoma gene 1    | <a href="#">Plag1</a>              | 1.463 | 3.958 | 0.00515782  | 0.0421883  |
| 1055 | 10502830 | <a href="#">NM_199465</a>          | <a href="#">68810</a>     | nexilin                        | <a href="#">Nexn</a>               | 1.463 | 1.159 | 0.283207    | 0.55849    |
| 1056 | 10423902 | <a href="#">NM_011766</a>          | <a href="#">22762</a>     | zinc finger protein, multitype | <a href="#">Zfpn2</a>              | 1.462 | 5.663 | 0.00068791  | 0.010129   |
| 1057 | 10453233 | <a href="#">NM_011406</a>          | <a href="#">20541</a>     | solute carrier family 8 (sodiu | <a href="#">Slc8a1</a>             | 1.462 | 3.565 | 0.00872017  | 0.0615624  |
| 1058 | 10438980 | <a href="#">NM_030138</a>          | <a href="#">78618</a>     | centaurin, beta 2              | <a href="#">Centb2</a>             | 1.461 | 5.66  | 0.000689844 | 0.0101478  |
| 1059 | 10485198 | <a href="#">NM_183180</a>          | <a href="#">241556</a>    | tetraspanin 18                 | <a href="#">Tspan18</a>            | 1.461 | 6.211 | 0.00039104  | 0.00681628 |
| 1060 | 10472050 | <a href="#">NM_009398</a>          | <a href="#">21930</a>     | tumor necrosis factor alpha in | <a href="#">Tnfaip6</a>            | 1.46  | 2.625 | 0.0332466   | 0.153788   |
| 1061 | 10427049 | <a href="#">ENSMUST00000071328</a> | <a href="#">77717</a>     | RIKEN cDNA 6030408B16 gene     | <a href="#">6030408B16Rik</a>      | 1.459 | 3.467 | 0.00996174  | 0.0679455  |
| 1062 | 10427471 | <a href="#">NM_011019</a>          | <a href="#">18414</a>     | oncostatin M receptor          | <a href="#">Osmr</a>               | 1.459 | 5.991 | 0.000487986 | 0.0079614  |
| 1063 | 10498383 | <a href="#">ENSMUST00000097075</a> | <a href="#">242050</a>    | immunoglobulin superfamily, me | <a href="#">Igsf10</a>             | 1.459 | 5.975 | 0.00049639  | 0.00806739 |
| 1064 | 10377537 |                                    |                           |                                |                                    | 1.458 | 6.113 | 0.000431303 | 0.00729643 |
| 1065 | 10433197 |                                    |                           |                                |                                    | 1.458 | 1.096 | 0.308301    | 0.585058   |
| 1066 | 10400609 | <a href="#">NM_207010</a>          | <a href="#">320772</a>    | MAM domain containing glycosyl | <a href="#">Mdga2</a>              | 1.458 | 3.448 | 0.0102273   | 0.0690444  |
| 1067 | 10409737 | <a href="#">NM_023328</a>          | <a href="#">67269</a>     | ATP/GTP binding protein 1      | <a href="#">Agtbp1</a>             | 1.457 | 3.651 | 0.00775212  | 0.0567952  |
| 1068 | 10394389 | <a href="#">ENSMUST00000037953</a> | <a href="#">72669</a>     | RIKEN cDNA 2810032G03 gene     | <a href="#">2810032G03Rik</a>      | 1.456 | 3.151 | 0.0155056   | 0.0924565  |
| 1069 | 10488147 | <a href="#">NM_178382</a>          | <a href="#">71436</a>     | fibronectin leucine rich trans | <a href="#">Flrt3</a>              | 1.456 | 2.312 | 0.0529454   | 0.208508   |
| 1070 | 10544089 | <a href="#">NM_028864</a>          | <a href="#">78781</a>     | zinc finger CCCH type, antivir | <a href="#">Zc3hav1</a>            | 1.456 | 5.002 | 0.00142969  | 0.0168502  |
| 1071 | 10594301 | <a href="#">NM_175484</a>          | <a href="#">235431</a>    | coronin, actin binding protein | <a href="#">Coro2b</a>             | 1.456 | 7.062 | 0.000174036 | 0.00403815 |
| 1072 | 10565759 | <a href="#">NM_178635</a>          | <a href="#">78610</a>     | UV radiation resistance associ | <a href="#">Uvrq</a>               | 1.455 | 5.768 | 0.000615065 | 0.00938306 |
| 1073 | 10502863 | <a href="#">NM_001081277</a>       | <a href="#">229949</a>    | adenylate kinase 5             | <a href="#">Ak5</a>                | 1.455 | 4.537 | 0.00248288  | 0.0253246  |
| 1074 | 10552494 | <a href="#">NM_028660</a>          | <a href="#">101533</a>    | kallikrein related-peptidase 9 | <a href="#">Klk9</a>               | 1.455 | 5.573 | 0.00075701  | 0.0108175  |
| 1075 | 10406456 | <a href="#">AY512938</a>           | <a href="#">791388</a>    | predicted gene, ENSMUSG0000006 | <a href="#">ENSMUSG00000069163</a> | 1.454 | 4.725 | 0.00197854  | 0.0214206  |
| 1076 | 10517967 | <a href="#">NM_133754</a>          | <a href="#">74202</a>     | filamin binding LIM protein 1  | <a href="#">Fblim1</a>             | 1.454 | 4.386 | 0.00299014  | 0.0286858  |
| 1077 | 10387536 | <a href="#">NM_009853</a>          | <a href="#">12514</a>     | CD68 antigen                   | <a href="#">Cd68</a>               | 1.454 | 3.699 | 0.0072677   | 0.0541657  |

|      |          |                                    |                           |                                 |                                    |       |       |             |            |
|------|----------|------------------------------------|---------------------------|---------------------------------|------------------------------------|-------|-------|-------------|------------|
| 1078 | 10568024 | <a href="#">NM_009898</a>          | <a href="#">12721</a>     | coronin, actin binding protein  | <a href="#">Coro1a</a>             | 1.454 | 4.427 | 0.00284266  | 0.0278522  |
| 1079 | 10490923 | <a href="#">NM_009801</a>          | <a href="#">12349</a>     | carbonic anhydrase 2            | <a href="#">Car2</a>               | 1.454 | 1.235 | 0.255457    | 0.529807   |
| 1080 | 10493114 | <a href="#">NM_016701</a>          | <a href="#">18008</a>     | nestin                          | <a href="#">Nes</a>                | 1.452 | 6.161 | 0.000410772 | 0.00707853 |
| 1081 | 10495925 |                                    |                           |                                 |                                    | 1.452 | 1.261 | 0.246571    | 0.519739   |
| 1082 | 10544763 | <a href="#">NM_008265</a>          | <a href="#">15401</a>     | homeo box A4                    | <a href="#">Hoxa4</a>              | 1.452 | 6.052 | 0.000458593 | 0.00760508 |
| 1083 | 10459671 | <a href="#">NM_007831</a>          | <a href="#">13176</a>     | deleted in colorectal carcinom  | <a href="#">Dcc</a>                | 1.45  | 2.983 | 0.0197249   | 0.108809   |
| 1084 | 10368970 | <a href="#">NM_007548</a>          | <a href="#">12142</a>     | PR domain containing 1, with Z  | <a href="#">Prdm1</a>              | 1.45  | 4.767 | 0.00188217  | 0.0206629  |
| 1085 | 10447294 | <a href="#">NM_011104</a>          | <a href="#">18754</a>     | protein kinase C, epsilon       | <a href="#">Prkce</a>              | 1.45  | 3.383 | 0.011203    | 0.0733139  |
| 1086 | 10537179 | <a href="#">NM_007563</a>          | <a href="#">12183</a>     | 2,3-bisphosphoglycerate mutase  | <a href="#">Bpgm</a>               | 1.45  | 5.422 | 0.000892193 | 0.0120849  |
| 1087 | 10461723 | <a href="#">BC038020</a>           | <a href="#">107373</a>    | RIKEN cDNA 4632417K18 gene      | <a href="#">4632417K18Rik</a>      | 1.45  | 4.398 | 0.0029447   | 0.028407   |
| 1088 | 10490304 | <a href="#">NM_177191</a>          | <a href="#">320558</a>    | synaptonemal complex protein 2  | <a href="#">Sycp2</a>              | 1.449 | 2.351 | 0.0499946   | 0.201094   |
| 1089 | 10423274 | <a href="#">NM_001081299</a>       | <a href="#">320865</a>    | cadherin 18                     | <a href="#">Cdh18</a>              | 1.449 | 2.435 | 0.0441016   | 0.185146   |
| 1090 | 10363706 | <a href="#">BC068318</a>           | <a href="#">108829</a>    | jumonji domain containing 1C    | <a href="#">Jmjd1c</a>             | 1.448 | 5.359 | 0.00095552  | 0.0127026  |
| 1091 | 10410408 | <a href="#">NM_153534</a>          | <a href="#">210044</a>    | adenylate cyclase 2             | <a href="#">Adcy2</a>              | 1.447 | 4.56  | 0.00241409  | 0.0248266  |
| 1092 | 10542738 | <a href="#">ENSMUST00000111704</a> | <a href="#">71323</a>     | Ras association (RalGDS/AF-6)   | <a href="#">Rassf8</a>             | 1.447 | 4.119 | 0.00418731  | 0.0360344  |
| 1093 | 10533050 | <a href="#">NM_030704</a>          | <a href="#">80888</a>     | heat shock protein 8            | <a href="#">Hspb8</a>              | 1.447 | 3.205 | 0.0143698   | 0.0876111  |
| 1094 | 10503709 | <a href="#">AK051661</a>           | <a href="#">100038651</a> | predicted gene, ENSMUSG0000007  | <a href="#">ENSMUSG00000073981</a> | 1.447 | 7.383 | 0.000130843 | 0.00330137 |
| 1095 | 10504450 | <a href="#">NM_027450</a>          | <a href="#">384009</a>    | GLI pathogenesis-related 2      | <a href="#">Glipr2</a>             | 1.447 | 5.238 | 0.00109366  | 0.0139472  |
| 1096 | 10523297 | <a href="#">NM_007635</a>          | <a href="#">12452</a>     | cyclin G2                       | <a href="#">Ceng2</a>              | 1.446 | 7.292 | 0.000141648 | 0.00346644 |
| 1097 | 10455112 | <a href="#">NM_053142</a>          | <a href="#">93888</a>     | protocadherin beta 17           | <a href="#">Pcdhb17</a>            | 1.446 | 3.058 | 0.0177161   | 0.100883   |
| 1098 | 10379489 | <a href="#">NM_029537</a>          | <a href="#">103743</a>    | transmembrane protein 98        | <a href="#">Tmem98</a>             | 1.446 | 4.913 | 0.00158458  | 0.0181497  |
| 1099 | 10498379 | <a href="#">XM_913941</a>          | <a href="#">242050</a>    | immunoglobulin superfamily, me  | <a href="#">Igsf10</a>             | 1.446 | 5.738 | 0.000635261 | 0.00959427 |
| 1100 | 10491136 | <a href="#">AK122306</a>           | <a href="#">665113</a>    | TRAF2 and NCK interacting kina  | <a href="#">Tnik</a>               | 1.446 | 2.848 | 0.0239912   | 0.123827   |
| 1101 | 10366446 | <a href="#">NM_146010</a>          | <a href="#">216350</a>    | tetraspanin 8                   | <a href="#">Tspan8</a>             | 1.446 | 1.246 | 0.251671    | 0.525573   |
| 1102 | 10527940 | <a href="#">NM_011074</a>          | <a href="#">18647</a>     | PFTAIRE protein kinase 1        | <a href="#">Pftk1</a>              | 1.446 | 4.204 | 0.00375425  | 0.0333809  |
| 1103 | 10443091 | <a href="#">XM_985548</a>          | <a href="#">240057</a>    | synaptic Ras GTPase activating  | <a href="#">Syngap1</a>            | 1.445 | 4.184 | 0.00385353  | 0.0340489  |
| 1104 | 10570483 | <a href="#">NM_073751</a>          | <a href="#">234994</a>    | Rho guanine nucleotide exchange | <a href="#">Arhgef10</a>           | 1.444 | 4.841 | 0.00173406  | 0.0192843  |
| 1105 | 10534493 | <a href="#">NM_019577</a>          | <a href="#">36221</a>     | chemokine (C-C motif) ligand 2  | <a href="#">Ccl24</a>              | 1.444 | 5.323 | 0.000955181 | 0.0136896  |
| 1106 | 10537062 | <a href="#">NM_008590</a>          | <a href="#">17294</a>     | mesoderm specific transcript    | <a href="#">Mest</a>               | 1.444 | 7.055 | 0.000175255 | 0.00405422 |
| 1107 | 10567299 | <a href="#">NM_001033380</a>       | <a href="#">319622</a>    | RIKEN cDNA E030018N11 gene      | <a href="#">E030018N11Rik</a>      | 1.443 | 6.935 | 0.00019553  | 0.00434274 |
| 1108 | 10409599 |                                    |                           |                                 |                                    | 1.443 | 3.462 | 0.0100357   | 0.0682302  |
| 1109 | 10431812 | <a href="#">NM_016743</a>          | <a href="#">54003</a>     | NEL-like 2 (chicken)            | <a href="#">Nell2</a>              | 1.443 | 3.767 | 0.00663637  | 0.0505655  |
| 1110 | 10547282 | <a href="#">NM_011763</a>          | <a href="#">22750</a>     | zinc finger protein 9           | <a href="#">Zfp9</a>               | 1.443 | 2.843 | 0.024163    | 0.124489   |
| 1111 | 10597239 | <a href="#">NM_011199</a>          | <a href="#">19228</a>     | parathyroid hormone receptor 1  | <a href="#">Pthr1</a>              | 1.442 | 5.948 | 0.000510146 | 0.00820268 |
| 1112 | 10484622 | <a href="#">NM_146590</a>          | <a href="#">258583</a>    | olfactory receptor 1085         | <a href="#">Olfr1085</a>           | 1.442 | 2.347 | 0.0502544   | 0.201609   |
| 1113 | 10478219 | <a href="#">NM_021280</a>          | <a href="#">18803</a>     | phospholipase C, gamma 1        | <a href="#">Plcg1</a>              | 1.442 | 6.411 | 0.000321069 | 0.00594977 |
| 1114 | 10575693 | <a href="#">BC056927</a>           | <a href="#">270097</a>    | expressed sequence AI427515     | <a href="#">AI427515</a>           | 1.442 | 2.458 | 0.0426389   | 0.18089    |
| 1115 | 10604630 | <a href="#">NM_027409</a>          | <a href="#">70380</a>     | motile sperm domain containing  | <a href="#">Mospd1</a>             | 1.441 | 5.688 | 0.000669361 | 0.00993888 |
| 1116 | 10444135 | <a href="#">NM_001013793</a>       | <a href="#">433100</a>    | expressed sequence AA388235     | <a href="#">AA388235</a>           | 1.441 | 4.304 | 0.0033125   | 0.0306385  |
| 1117 | 10427095 | <a href="#">NM_153533</a>          | <a href="#">209039</a>    | tensin like C1 domain-containi  | <a href="#">Tenc1</a>              | 1.44  | 5.842 | 0.000569531 | 0.00888721 |
| 1118 | 10374777 | <a href="#">NM_146015</a>          | <a href="#">216616</a>    | epidermal growth factor-contai  | <a href="#">Efemp1</a>             | 1.44  | 2.453 | 0.0429384   | 0.181833   |
| 1119 | 10435748 | <a href="#">AK086454</a>           | <a href="#">320874</a>    | RIKEN cDNA D930030D11 gene      | <a href="#">D930030D11Rik</a>      | 1.44  | 3.384 | 0.0111883   | 0.0732403  |
| 1120 | 10538811 | <a href="#">NM_027547</a>          | <a href="#">70779</a>     | PR domain containing 5          | <a href="#">Prdm5</a>              | 1.44  | 6.921 | 0.000198034 | 0.0043708  |
| 1121 | 10497051 | <a href="#">NM_001039094</a>       | <a href="#">320840</a>    | neuronal growth regulator 1     | <a href="#">Negr1</a>              | 1.44  | 3.7   | 0.00726077  | 0.0541332  |
| 1122 | 10422227 | <a href="#">NM_011897</a>          | <a href="#">24064</a>     | sprouty homolog 2 (Drosophila)  | <a href="#">Spry2</a>              | 1.44  | 2.875 | 0.0230578   | 0.120706   |
| 1123 | 10594540 | <a href="#">NM_153119</a>          | <a href="#">102595</a>    | pleckstrin homology domain con  | <a href="#">Plekho2</a>            | 1.439 | 3.348 | 0.0117587   | 0.0757083  |
| 1124 | 10524983 | <a href="#">NM_172424</a>          | <a href="#">76199</a>     | mediator complex subunit 13-li  | <a href="#">Med13l</a>             | 1.439 | 8.066 | 7.35168e-05 | 0.00225281 |
| 1125 | 10600326 | <a href="#">NM_031379</a>          | <a href="#">83553</a>     | transketolase-like 1            | <a href="#">Tktl1</a>              | 1.439 | 3.067 | 0.0174921   | 0.0999956  |
| 1126 | 10586441 | <a href="#">NM_010952</a>          | <a href="#">18247</a>     | ornithine decarboxylase antizy  | <a href="#">Oaz2</a>               | 1.437 | 4.464 | 0.00271552  | 0.0270061  |
| 1127 | 10407420 | <a href="#">NM_019671</a>          | <a href="#">56349</a>     | neuroepithelial cell transform  | <a href="#">Net1</a>               | 1.437 | 3.826 | 0.0061388   | 0.0476151  |
| 1128 | 10358537 | <a href="#">NM_001024720</a>       | <a href="#">545370</a>    | hemicentin 1                    | <a href="#">Hmen1</a>              | 1.436 | 4.868 | 0.00167101  | 0.0188071  |
| 1129 | 10454632 | <a href="#">NM_009793</a>          | <a href="#">12326</a>     | calcium/calmodulin-dependent p  | <a href="#">Camk4</a>              | 1.436 | 4.423 | 0.00285459  | 0.0279433  |
| 1130 | 10480347 | <a href="#">NM_008845</a>          | <a href="#">18718</a>     | phosphatidylinositol-5-phospha  | <a href="#">Pip4k2a</a>            | 1.435 | 3.975 | 0.00504501  | 0.0415985  |

|      |          |                                    |                        |                                |                                    |       |       |             |            |
|------|----------|------------------------------------|------------------------|--------------------------------|------------------------------------|-------|-------|-------------|------------|
| 1131 | 10481540 | <a href="#">NM_001038700</a>       | <a href="#">14269</a>  | formin binding protein 1       | <a href="#">Fbnp1</a>              | 1.435 | 4.763 | 0.00189177  | 0.0207467  |
| 1132 | 10370037 | <a href="#">NM_008606</a>          | <a href="#">17385</a>  | matrix metalloproteinase 11    | <a href="#">Mmp11</a>              | 1.435 | 4.505 | 0.00258186  | 0.0259957  |
| 1133 | 10467838 |                                    |                        |                                |                                    | 1.434 | 1.034 | 0.334746    | 0.610372   |
| 1134 | 10463482 | <a href="#">NM_021901</a>          | <a href="#">21908</a>  | T-cell leukemia, homeobox 1    | <a href="#">Tlx1</a>               | 1.434 | 6.441 | 0.000311557 | 0.00584812 |
| 1135 | 10540085 | <a href="#">NM_007992</a>          | <a href="#">14115</a>  | fibulin 2                      | <a href="#">Fbln2</a>              | 1.434 | 4.913 | 0.0015857   | 0.0181527  |
| 1136 | 10387797 | <a href="#">NM_007528</a>          | <a href="#">12029</a>  | B-cell CLL/lymphoma 6, member  | <a href="#">Bcl6b</a>              | 1.434 | 3.314 | 0.012324    | 0.0782223  |
| 1137 | 10398907 | <a href="#">NM_178911</a>          | <a href="#">104759</a> | phospholipase D family, member | <a href="#">Pld4</a>               | 1.434 | 4.167 | 0.00393567  | 0.034558   |
| 1138 | 10439299 | <a href="#">NM_025288</a>          | <a href="#">20863</a>  | stefin A3                      | <a href="#">Stfa3</a>              | 1.434 | 1.347 | 0.218741    | 0.486928   |
| 1139 | 10501164 | <a href="#">NM_007778</a>          | <a href="#">12977</a>  | colony stimulating factor 1 (m | <a href="#">Csf1</a>               | 1.433 | 3.603 | 0.00827884  | 0.0593583  |
| 1140 | 10368175 | <a href="#">NM_013873</a>          | <a href="#">29863</a>  | phosphodiesterase 7B           | <a href="#">Pde7b</a>              | 1.433 | 2.496 | 0.0102851   | 0.17469    |
|      | 10522288 | <a href="#">NM_001033415</a>       | <a href="#">530096</a> | shisa homolog 3 (Xenopus laevi | <a href="#">Shisa3</a>             | 1.433 | 2.44  | 0.0437798   | 0.1843     |
| 1142 | 10355050 | <a href="#">NM_001045513</a>       | <a href="#">77300</a>  | Ras association (RalGDS/AF-6)  | <a href="#">Raph1</a>              | 1.432 | 4.772 | 0.0018709   | 0.0205498  |
| 1143 | 10499861 | <a href="#">NM_009114</a>          | <a href="#">20202</a>  | S100 calcium binding protein A | <a href="#">S100a9</a>             | 1.431 | 1.482 | 0.180537    | 0.43631    |
| 1144 | 10372383 | <a href="#">BC051527</a>           | <a href="#">320150</a> | zinc finger, DHHC domain conta | <a href="#">Zdhhc17</a>            | 1.431 | 6.333 | 0.000346449 | 0.00625014 |
| 1145 | 10359480 | <a href="#">NM_001038619</a>       | <a href="#">103967</a> | dynamins 3                     | <a href="#">Dnm3</a>               | 1.431 | 8.011 | 7.68696e-05 | 0.00231859 |
| 1146 | 10544885 | <a href="#">NM_153573</a>          | <a href="#">231997</a> | FK506 binding protein 14       | <a href="#">Fkbp14</a>             | 1.431 | 2.495 | 0.0403569   | 0.174894   |
| 1147 | 10391762 | <a href="#">NM_008122</a>          | <a href="#">14615</a>  | gap junction protein, gamma 1  | <a href="#">Gjcl</a>               | 1.43  | 5.842 | 0.000569428 | 0.00888721 |
| 1148 | 10344990 | <a href="#">NM_031402</a>          | <a href="#">83691</a>  | cysteine-rich secretory protei | <a href="#">Crispld1</a>           | 1.43  | 3.408 | 0.0108089   | 0.0715825  |
| 1149 | 10368045 | <a href="#">NM_028440</a>          | <a href="#">73112</a>  | RIKEN cDNA 3110003A17 gene     | <a href="#">3110003A17Rik</a>      | 1.43  | 3.715 | 0.00711305  | 0.0532572  |
| 1150 | 10595979 | <a href="#">NM_008624</a>          | <a href="#">17532</a>  | muscle and microspikes RAS     | <a href="#">Mras</a>               | 1.43  | 3.403 | 0.010891    | 0.0718818  |
| 1151 | 10428157 | <a href="#">NM_013923</a>          | <a href="#">30945</a>  | ring finger protein 19A        | <a href="#">Rnf19a</a>             | 1.43  | 8.101 | 7.14587e-05 | 0.00220573 |
| 1152 | 10469577 | <a href="#">ENSMUST00000105000</a> | <a href="#">791278</a> | predicted gene, ENSMUSG0000006 | <a href="#">ENSMUSG00000063691</a> | 1.429 | 2.311 | 0.0530218   | 0.208731   |
| 1153 | 10569890 | <a href="#">BC086763</a>           | <a href="#">108909</a> | RIKEN cDNA 2610208M17 gene     | <a href="#">2610208M17Rik</a>      | 1.429 | 5.044 | 0.00136288  | 0.0163592  |
| 1154 | 10549506 | <a href="#">NM_177192</a>          | <a href="#">320560</a> | RIKEN cDNA D030011O10 gene     | <a href="#">D030011O10Rik</a>      | 1.429 | 2.872 | 0.0231838   | 0.120967   |
| 1155 | 10496605 | <a href="#">NM_173763</a>          | <a href="#">229905</a> | cysteine conjugate-beta lyase  | <a href="#">Ccb12</a>              | 1.429 | 2.837 | 0.0243776   | 0.125168   |
| 1156 | 10368409 | <a href="#">NM_008481</a>          | <a href="#">16773</a>  | laminin, alpha 2               | <a href="#">Lama2</a>              | 1.429 | 2.027 | 0.0810286   | 0.271716   |
| 1157 | 10560139 | <a href="#">NM_001039146</a>       | <a href="#">627280</a> | RIKEN cDNA B430211C08 gene     | <a href="#">B430211C08Rik</a>      | 1.429 | 5.824 | 0.000580175 | 0.00899357 |
| 1158 | 10529206 | <a href="#">NM_022424</a>          | <a href="#">64339</a>  | fibronectin type III domain co | <a href="#">Fnde4</a>              | 1.429 | 5.483 | 0.000834535 | 0.0115341  |
| 1159 | 10536667 | <a href="#">NM_001081306</a>       | <a href="#">19283</a>  | protein tyrosine phosphatase,  | <a href="#">Ptrpz1</a>             | 1.429 | 3.78  | 0.00651948  | 0.0498366  |
| 1160 | 10531175 | <a href="#">NM_001081401</a>       | <a href="#">330119</a> | a disintegrin-like and metallo | <a href="#">Adamts3</a>            | 1.428 | 1.852 | 0.105192    | 0.319429   |
| 1161 | 10443095 | <a href="#">ENSMUST00000081285</a> | <a href="#">240057</a> | synaptic Ras GTPase activating | <a href="#">Syngap1</a>            | 1.427 | 5.201 | 0.0011406   | 0.0144068  |
| 1162 | 10371506 | <a href="#">NM_138673</a>          | <a href="#">192188</a> | stabilin 2                     | <a href="#">Stab2</a>              | 1.426 | 4.635 | 0.00220433  | 0.0233315  |
| 1163 | 10491970 | <a href="#">NM_175386</a>          | <a href="#">108927</a> | lipoma HMGIC fusion partner    | <a href="#">Lhfp</a>               | 1.426 | 3.464 | 0.0100072   | 0.0680857  |
| 1164 | 10490551 | <a href="#">NM_021426</a>          | <a href="#">58237</a>  | Na+/K+ transporting ATPase int | <a href="#">Nkain4</a>             | 1.426 | 4.583 | 0.00234783  | 0.0243585  |
| 1165 | 10489878 | <a href="#">NM_008968</a>          | <a href="#">19223</a>  | prostaglandin I2 (prostacyclin | <a href="#">Ptgis</a>              | 1.426 | 5.166 | 0.00118591  | 0.0148636  |
| 1166 | 10584317 | <a href="#">NM_027102</a>          | <a href="#">69524</a>  | endothelial cell-specific adhe | <a href="#">Esam1</a>              | 1.426 | 4.099 | 0.00429693  | 0.0367385  |
| 1167 | 10441791 | <a href="#">ENSMUST00000105044</a> | <a href="#">52042</a>  | DNA segment, Chr 17, ERATO Doi | <a href="#">D17Erdt663e</a>        | 1.425 | 5.004 | 0.00142689  | 0.0168385  |
| 1168 | 10346348 | <a href="#">BC021879</a>           | <a href="#">67198</a>  | RIKEN cDNA 2810022L02 gene     | <a href="#">2810022L02Rik</a>      | 1.425 | 3.23  | 0.0138719   | 0.0854128  |
| 1169 | 10586433 | <a href="#">NM_028030</a>          | <a href="#">71973</a>  | RNA binding protein with multi | <a href="#">Rbpm2</a>              | 1.425 | 3.018 | 0.0187515   | 0.105112   |
| 1170 | 10489391 | <a href="#">NM_007398</a>          | <a href="#">11486</a>  | adenosine deaminase            | <a href="#">Ada</a>                | 1.424 | 4.561 | 0.00241034  | 0.0248122  |
| 1171 | 10521498 | <a href="#">NM_007765</a>          | <a href="#">12933</a>  | collapsin response mediator pr | <a href="#">Crmp1</a>              | 1.424 | 3.867 | 0.00581009  | 0.0459935  |
| 1172 | 10605820 | <a href="#">NM_001003916</a>       | <a href="#">245522</a> | cDNA sequence AK129302         | <a href="#">AK129302</a>           | 1.424 | 3.981 | 0.00500338  | 0.041341   |
| 1173 | 10506134 | <a href="#">NM_175029</a>          | <a href="#">242557</a> | autophagy-related 4C (yeast)   | <a href="#">Atg4c</a>              | 1.423 | 2.155 | 0.0669754   | 0.241723   |
| 1174 | 10436487 | <a href="#">ENSMUST00000116587</a> | <a href="#">73569</a>  | vestigial like 3 (Drosophila)  | <a href="#">Vgl3</a>               | 1.422 | 3.894 | 0.00560601  | 0.044882   |
| 1175 | 10587299 | <a href="#">NM_019987</a>          | <a href="#">56542</a>  | intestinal cell kinase         | <a href="#">Ick</a>                | 1.422 | 4.034 | 0.00467027  | 0.0392325  |
| 1176 | 10452793 | <a href="#">NM_027864</a>          | <a href="#">71685</a>  | UDP-N-acetyl-alpha-D-galactosa | <a href="#">Galnt14</a>            | 1.422 | 3.043 | 0.0180949   | 0.102354   |
| 1177 | 10423520 | <a href="#">NM_009154</a>          | <a href="#">20356</a>  | sema domain, seven thrombospon | <a href="#">Sema5a</a>             | 1.422 | 2.649 | 0.0320895   | 0.150244   |
| 1178 | 10407416 | <a href="#">NM_027416</a>          | <a href="#">70405</a>  | calmodulin-like 3              | <a href="#">Calml3</a>             | 1.422 | 4.303 | 0.00331613  | 0.0306428  |
| 1179 | 10430145 | <a href="#">NM_053104</a>          | <a href="#">93686</a>  | RNA binding motif protein 9    | <a href="#">Rbm9</a>               | 1.421 | 6.208 | 0.000392234 | 0.00682585 |
| 1180 | 10367822 | <a href="#">NM_026405</a>          | <a href="#">67844</a>  | RAB32, member RAS oncogene fam | <a href="#">Rab32</a>              | 1.42  | 2.801 | 0.0256994   | 0.129873   |

|      |          |                                    |                           |                                    |                                    |       |       |             |            |
|------|----------|------------------------------------|---------------------------|------------------------------------|------------------------------------|-------|-------|-------------|------------|
| 1181 | 10424543 | <a href="#">NM_018865</a>          | <a href="#">22402</a>     | WNT1 inducible signaling pathw     | <a href="#">Wisp1</a>              | 1.42  | 4.869 | 0.0016685   | 0.0188053  |
| 1182 | 10369752 | <a href="#">NM_178678</a>          | <a href="#">216028</a>    | leucine rich repeat transmembr     | <a href="#">Lrrtm3</a>             | 1.42  | 1.858 | 0.104302    | 0.31773    |
| 1183 | 10416958 |                                    |                           |                                    |                                    | 1.419 | 2.399 | 0.046498    | 0.191643   |
| 1184 | 10391649 | <a href="#">NM_011403</a>          | <a href="#">20533</a>     | solute carrier family 4 (anion     | <a href="#">Slc4a1</a>             | 1.419 | 1.276 | 0.241406    | 0.514329   |
| 1185 | 10358224 | <a href="#">NM_001111316</a>       | <a href="#">19264</a>     | protein tyrosine phosphatase,      | <a href="#">Ptpre</a>              | 1.418 | 3.884 | 0.00568061  | 0.0452369  |
| 1186 | 10566366 | <a href="#">NM_199146</a>          | <a href="#">209387</a>    | expressed sequence AI451617        | <a href="#">AI451617</a>           | 1.418 | 2.655 | 0.031847    | 0.14934    |
| 1187 | 10567589 | <a href="#">ENSMUST00000025327</a> | <a href="#">76179</a>     | ubiquitin specific peptidase 3     | <a href="#">Usp31</a>              | 1.418 | 6.372 | 0.000333275 | 0.00609055 |
| 1188 | 10446986 | <a href="#">NM_015800</a>          | <a href="#">50766</a>     | cysteine rich transmembrane BM     | <a href="#">Crim1</a>              | 1.418 | 5.659 | 0.000690376 | 0.0101478  |
| 1189 | 10540359 | <a href="#">NM_001109749</a>       | <a href="#">269784</a>    | contactin 4                        | <a href="#">Cntn4</a>              | 1.417 | 2.65  | 0.032078    | 0.150244   |
| 1190 | 10360506 | <a href="#">NM_011785</a>          | <a href="#">23797</a>     | thymoma viral proto-oncogene 3     | <a href="#">Akt3</a>               | 1.416 | 6.147 | 0.000416678 | 0.0071628  |
| 1191 | 10593591 | <a href="#">NM_144784</a>          | <a href="#">110446</a>    | acetyl-Coenzyme A acetyltransf     | <a href="#">Acat1</a>              | 1.416 | 3.146 | 0.0156345   | 0.0928584  |
| 1192 | 10454235 | <a href="#">ENSMUST00000062608</a> | <a href="#">211961</a>    | additional sex combs like 3 (D     | <a href="#">Asx13</a>              | 1.416 | 3.829 | 0.00610766  | 0.0474981  |
| 1193 | 10515090 | <a href="#">NM_007671</a>          | <a href="#">12580</a>     | cyclin-dependent kinase inhibi     | <a href="#">Cdkn2c</a>             | 1.416 | 6.972 | 0.000188875 | 0.00422741 |
| 1194 | 10480145 | <a href="#">NM_009105</a>          | <a href="#">20163</a>     | Ras suppressor protein 1           | <a href="#">Rsu1</a>               | 1.414 | 3.99  | 0.00494519  | 0.0409882  |
| 1195 | 10578017 | <a href="#">AK035883</a>           | <a href="#">100101427</a> | predicted gene,<br>ENSMUSG00000005 | <a href="#">ENSMUSG00000053570</a> | 1.414 | 0.712 | 0.498776    | 0.742429   |
| 1196 | 10468992 | <a href="#">NM_172475</a>          | <a href="#">209630</a>    | FERM domain containing 4A          | <a href="#">Frm4a</a>              | 1.414 | 4.215 | 0.00370303  | 0.0331485  |
| 1197 | 10385903 | <a href="#">NM_019417</a>          | <a href="#">30794</a>     | PDZ and LIM domain 4               | <a href="#">Pdlim4</a>             | 1.413 | 5.971 | 0.000498461 | 0.00808259 |
| 1198 | 10470283 | <a href="#">NM_198724</a>          | <a href="#">353156</a>    | EGF-like domain 7                  | <a href="#">Egfl7</a>              | 1.413 | 6.043 | 0.000463226 | 0.00765191 |
| 1199 | 10597268 | <a href="#">NM_011562</a>          | <a href="#">21667</a>     | teratocarcinoma-derived growth     | <a href="#">Tdgf1</a>              | 1.412 | 1.544 | 0.165131    | 0.415214   |
| 1200 | 10472235 | <a href="#">NM_029723</a>          | <a href="#">76747</a>     | death associated protein-like      | <a href="#">Dapl1</a>              | 1.411 | 4.18  | 0.00387208  | 0.0341512  |
| 1201 | 10511939 | <a href="#">NM_026293</a>          | <a href="#">67652</a>     | sperm acrosome associated 1        | <a href="#">Spaca1</a>             | 1.411 | 2.818 | 0.0250776   | 0.127646   |
| 1202 | 10434094 | <a href="#">NM_145479</a>          | <a href="#">224023</a>    | kelch-like 22 (Drosophila)         | <a href="#">Klhl22</a>             | 1.41  | 6.119 | 0.000428824 | 0.00727109 |
| 1203 | 10386058 | <a href="#">NM_009242</a>          | <a href="#">20692</a>     | secreted acidic cysteine rich      | <a href="#">Sparc</a>              | 1.409 | 7.47  | 0.000121232 | 0.00314805 |
| 1204 | 10400304 | <a href="#">NM_028133</a>          | <a href="#">112407</a>    | EGL nine homolog 3 (C. elegans     | <a href="#">Egln3</a>              | 1.409 | 1.47  | 0.183757    | 0.440966   |
| 1205 | 10466932 | <a href="#">NM_013754</a>          | <a href="#">27356</a>     | insulin-like 6                     | <a href="#">Insl6</a>              | 1.408 | 4.428 | 0.00283694  | 0.0278091  |
| 1206 | 10555235 | <a href="#">NM_177231</a>          | <a href="#">109689</a>    | arrestin, beta 1                   | <a href="#">Arb1</a>               | 1.408 | 7.34  | 0.000135843 | 0.0033771  |
| 1207 | 10482772 | <a href="#">NM_013613</a>          | <a href="#">18227</a>     | nuclear receptor subfamily 4,      | <a href="#">Nr4a2</a>              | 1.408 | 4.615 | 0.00225855  | 0.0237704  |
| 1208 | 10531560 | <a href="#">NM_133738</a>          | <a href="#">71914</a>     | anthrax toxin receptor 2           | <a href="#">Antxr2</a>             | 1.408 | 4.991 | 0.00144796  | 0.0169429  |
| 1209 | 10424582 |                                    |                           |                                    |                                    | 1.407 | 1.446 | 0.190286    | 0.449292   |
| 1210 | 10584208 | <a href="#">NM_021339</a>          | <a href="#">57810</a>     | cell adhesion molecule-related     | <a href="#">Cdon</a>               | 1.406 | 3.546 | 0.00894726  | 0.0627466  |
| 1211 | 10490731 | <a href="#">NM_009236</a>          | <a href="#">20672</a>     | SRY-box containing gene 18         | <a href="#">Sox18</a>              | 1.406 | 4.305 | 0.00330819  | 0.0306119  |
| 1212 | 10439483 | <a href="#">NM_020260</a>          | <a href="#">12549</a>     | Cdc42 GTPase-activating protei     | <a href="#">Cdgap</a>              | 1.404 | 5.62  | 0.000720198 | 0.0104659  |
| 1213 | 10466938 | <a href="#">BC024953</a>           | <a href="#">67759</a>     | RIKEN cDNA 5033414D02<br>gene      | <a href="#">5033414D02Rik</a>      | 1.404 | 4.507 | 0.00257351  | 0.0259383  |
| 1214 | 10582916 |                                    |                           |                                    |                                    | 1.404 | 1.256 | 0.248124    | 0.521503   |
| 1215 | 10554586 | <a href="#">AK080712</a>           | <a href="#">73907</a>     | RIKEN cDNA 4833418N17<br>gene      | <a href="#">4833418N17Rik</a>      | 1.404 | 1.969 | 0.0883638   | 0.286515   |
| 1216 | 10503376 | <a href="#">DQ351292</a>           | <a href="#">208820</a>    | predicted gene,<br>OTTMUSG00000000 | <a href="#">OTTMUSG00000004461</a> | 1.403 | 2.627 | 0.0331554   | 0.153534   |
| 1217 | 10353258 | <a href="#">XM_001475855</a>       | <a href="#">75799</a>     | RIKEN cDNA 4930444P10 gene         | <a href="#">4930444P10Rik</a>      | 1.403 | 3.568 | 0.00867673  | 0.0613582  |
| 1218 | 10542791 | <a href="#">NM_026221</a>          | <a href="#">67533</a>     | PTPRF interacting protein, bin     | <a href="#">Ppfbp1</a>             | 1.402 | 4.926 | 0.00156195  | 0.0179488  |
| 1219 | 10465424 | <a href="#">ENSMUST00000063955</a> | <a href="#">100008567</a> | predicted gene,<br>OTTMUSG00000001 | <a href="#">OTTMUSG00000018617</a> | 1.401 | 5.538 | 0.000785825 | 0.0110992  |
| 1220 | 10403352 | <a href="#">NM_011803</a>          | <a href="#">23849</a>     | Kruppel-like factor 6              | <a href="#">Klf6</a>               | 1.401 | 4.315 | 0.00326731  | 0.0303532  |
| 1221 | 10602372 | <a href="#">NM_009653</a>          | <a href="#">11656</a>     | aminolevulinic acid synthase 2     | <a href="#">Alas2</a>              | 1.4   | 2.185 | 0.0640042   | 0.23503    |
| 1222 | 10439881 | <a href="#">ENSMUST00000089395</a> | <a href="#">68190</a>     | RIKEN cDNA 5330426P16 gene         | <a href="#">5330426P16Rik</a>      | 1.4   | 2.516 | 0.0390746   | 0.171271   |
| 1223 | 10585974 |                                    |                           |                                    |                                    | 1.4   | 2.123 | 0.0702355   | 0.248316   |
| 1224 | 10605437 | <a href="#">NM_145629</a>          | <a href="#">102866</a>    | plastin 3 (T-isoform)              | <a href="#">Pls3</a>               | 1.399 | 3.68  | 0.00745279  | 0.0552143  |
| 1225 | 10434229 | <a href="#">NM_013805</a>          | <a href="#">12741</a>     | claudin 5                          | <a href="#">Cldn5</a>              | 1.399 | 4.396 | 0.00295212  | 0.0284299  |
| 1226 | 10372796 | <a href="#">NM_010441</a>          | <a href="#">15364</a>     | high mobility group AT-hook 2      | <a href="#">Hmga2</a>              | 1.399 | 5.792 | 0.000599671 | 0.00921471 |
| 1227 | 10599001 | <a href="#">NM_007429</a>          | <a href="#">11609</a>     | angiotensin II receptor, type      | <a href="#">Atr2</a>               | 1.398 | 2.791 | 0.0260658   | 0.130787   |
| 1228 | 10578623 | <a href="#">NM_133791</a>          | <a href="#">52357</a>     | WW, C2 and coiled-coil domain      | <a href="#">Wwc2</a>               | 1.398 | 4.618 | 0.00224964  | 0.0236884  |
| 1229 | 10481772 | <a href="#">NM_178888</a>          | <a href="#">99326</a>     | GTPase activating RANGAP<br>domai  | <a href="#">Garnl3</a>             | 1.398 | 5.29  | 0.00103185  | 0.0134013  |
| 1230 | 10471655 | <a href="#">NM_146120</a>          | <a href="#">227753</a>    | gelsolin                           | <a href="#">Gsn</a>                | 1.398 | 3.482 | 0.00976894  | 0.0669544  |
| 1231 | 10567626 | <a href="#">NM_028758</a>          | <a href="#">74105</a>     | golgi associated, gamma adapti     | <a href="#">Gga2</a>               | 1.397 | 6.984 | 0.000186876 | 0.00422236 |
| 1232 | 10381840 | <a href="#">BC050801</a>           | <a href="#">70894</a>     | RIKEN cDNA 4021510I17 gene         | <a href="#">4021510I17Rik</a>      | 1.397 | 3.147 | 0.0156128   | 0.0028214  |

|      |          |                                    |                        |                                |                               |       |       |             |            |
|------|----------|------------------------------------|------------------------|--------------------------------|-------------------------------|-------|-------|-------------|------------|
| 1232 | 1050187  | <a href="#">BC050601</a>           | <a href="#">7927</a>   | RIKEN cDNA 72191017 gene       | <a href="#">72191017Rik</a>   | 1.397 | 3.147 | 0.0150128   | 0.0228217  |
| 1233 | 10467110 | <a href="#">BC052506</a>           | <a href="#">381236</a> | expressed sequence AI747699    | <a href="#">A1747699</a>      | 1.397 | 2.328 | 0.0517183   | 0.205551   |
| 1234 | 10426611 | <a href="#">NM_007581</a>          | <a href="#">12297</a>  | calcium channel, voltage-depen | <a href="#">Cacnb3</a>        | 1.396 | 6.415 | 0.000319799 | 0.00593143 |
| 1235 | 10505717 | <a href="#">NM_029967</a>          | <a href="#">77739</a>  | ADAMTS-like 1                  | <a href="#">Adamts1</a>       | 1.396 | 2.291 | 0.054623    | 0.212894   |
| 1236 | 10559649 | <a href="#">NM_183406</a>          | <a href="#">333182</a> | cytochrome c oxidase subunit V | <a href="#">Cox6b2</a>        | 1.396 | 3.163 | 0.015253    | 0.0914142  |
| 1237 | 10422496 | <a href="#">NM_183031</a>          | <a href="#">321019</a> | Epstein-Barr virus induced gen | <a href="#">Ebi2</a>          | 1.395 | 5.581 | 0.000750684 | 0.0107829  |
| 1238 | 10549760 | <a href="#">BC066001</a>           | <a href="#">68992</a>  | zinc finger protein 580        | <a href="#">Zfp580</a>        | 1.395 | 4.355 | 0.00310833  | 0.0294192  |
| 1239 | 10559964 | <a href="#">NM_009577</a>          | <a href="#">22775</a>  | zinc finger protein interactin | <a href="#">Zik1</a>          | 1.395 | 3.797 | 0.00637747  | 0.0490168  |
| 1240 | 10393569 | <a href="#">NM_021440</a>          | <a href="#">58251</a>  | differential display clone 8   | <a href="#">RP23-39409.3</a>  | 1.394 | 4.448 | 0.0027689   | 0.0273322  |
| 1241 | 10572897 | <a href="#">NM_010442</a>          | <a href="#">15368</a>  | heme oxygenase (decycling) 1   | <a href="#">Hmox1</a>         | 1.394 | 1.92  | 0.0951115   | 0.299747   |
| 1242 | 10448094 | <a href="#">NM_172827</a>          | <a href="#">240028</a> | leucyl/cystinyl aminopeptidase | <a href="#">Lnpep</a>         | 1.393 | 4.563 | 0.00240488  | 0.024768   |
| 1243 | 10380419 | <a href="#">NM_007742</a>          | <a href="#">12842</a>  | collagen, type I, alpha 1      | <a href="#">Col1a1</a>        | 1.393 | 4.571 | 0.00238116  | 0.0246076  |
| 1244 | 10539517 | <a href="#">NM_021469</a>          | <a href="#">26903</a>  | dysferlin                      | <a href="#">Dysf</a>          | 1.392 | 7.036 | 0.000178313 | 0.00410086 |
| 1245 | 10407291 | <a href="#">NM_172595</a>          | <a href="#">218639</a> | ADP-ribosylation factor-like 1 | <a href="#">Arl15</a>         | 1.392 | 4.192 | 0.00381529  | 0.0337914  |
| 1246 | 10420596 | <a href="#">NM_013869</a>          | <a href="#">29820</a>  | tumor necrosis factor receptor | <a href="#">Tnfrsf19</a>      | 1.392 | 2.637 | 0.0326997   | 0.152023   |
| 1247 | 10447799 | <a href="#">NM_010515</a>          | <a href="#">16004</a>  | insulin-like growth factor 2 r | <a href="#">Igf2r</a>         | 1.392 | 5.172 | 0.00117758  | 0.0147767  |
| 1248 | 10366310 | <a href="#">NM_175489</a>          | <a href="#">237542</a> | oxysterol binding protein-like | <a href="#">Osbp18</a>        | 1.391 | 4.286 | 0.00338491  | 0.0310771  |
| 1249 | 10496091 | <a href="#">NM_010703</a>          | <a href="#">16842</a>  | lymphoid enhancer binding fact | <a href="#">Lef1</a>          | 1.391 | 4.31  | 0.00328751  | 0.0304606  |
| 1250 | 10549504 | <a href="#">NM_177192</a>          | <a href="#">320560</a> | RIKEN cDNA D030011O10 gene     | <a href="#">D030011O10Rik</a> | 1.391 | 2.488 | 0.0407772   | 0.176044   |
| 1251 | 10430931 | <a href="#">NM_028728</a>          | <a href="#">74039</a>  | Nfat activating molecule with  | <a href="#">Nfam1</a>         | 1.39  | 6.93  | 0.000196407 | 0.00435315 |
| 1252 | 10526693 | <a href="#">NM_001005426</a>       | <a href="#">381678</a> | zinc finger, CW type with PWWP | <a href="#">Zcwpw1</a>        | 1.389 | 3.66  | 0.00765924  | 0.0563022  |
| 1253 | 10388938 | <a href="#">NM_019653</a>          | <a href="#">78889</a>  | WD repeat and SOCS box-contain | <a href="#">Wsb1</a>          | 1.388 | 4.823 | 0.00176209  | 0.0196302  |
| 1254 | 10474045 | <a href="#">NM_023850</a>          | <a href="#">76969</a>  | carbohydrate (keratan sulfate  | <a href="#">Chst1</a>         | 1.388 | 7.504 | 0.000117747 | 0.00309835 |
| 1255 | 10580324 | <a href="#">NM_001037745</a>       | <a href="#">244556</a> | zinc finger protein 791        | <a href="#">Zfp791</a>        | 1.386 | 1.556 | 0.162427    | 0.411033   |
| 1256 | 10459225 |                                    |                        |                                |                               | 1.386 | 2.151 | 0.0673391   | 0.242464   |
| 1257 | 10408656 | <a href="#">NM_011868</a>          | <a href="#">23986</a>  | peroxisomal delta3, delta2-eno | <a href="#">Peci</a>          | 1.386 | 4.939 | 0.00153771  | 0.0177378  |
| 1258 | 10519815 | <a href="#">NM_001110843</a>       | <a href="#">12293</a>  | calcium channel, voltage-depen | <a href="#">Cacna2d1</a>      | 1.385 | 2.641 | 0.0324955   | 0.151507   |
| 1259 | 10381934 | <a href="#">NM_181071</a>          | <a href="#">77097</a>  | tetratricopeptide repeat, anky | <a href="#">Tanc2</a>         | 1.384 | 3.163 | 0.0152499   | 0.0914142  |
| 1260 | 10493889 | <a href="#">NM_028622</a>          | <a href="#">73719</a>  | late cornified envelope 1C     | <a href="#">Lce1c</a>         | 1.384 | 2.819 | 0.0250087   | 0.127548   |
| 1261 | 10460603 | <a href="#">NM_021474</a>          | <a href="#">58859</a>  | epidermal growth factor-contai | <a href="#">Efemp2</a>        | 1.384 | 5.75  | 0.000626746 | 0.00949958 |
| 1262 | 10538247 | <a href="#">NM_023456</a>          | <a href="#">109648</a> | neuropeptide Y                 | <a href="#">Npy</a>           | 1.383 | 4.983 | 0.00146109  | 0.0170587  |
| 1263 | 10597743 | <a href="#">NM_009987</a>          | <a href="#">13051</a>  | chemokine (C-X3-C) receptor 1  | <a href="#">Cx3cr1</a>        | 1.383 | 4.45  | 0.00276184  | 0.0273085  |
| 1264 | 10416785 | <a href="#">ENSMUST00000067431</a> | <a href="#">75075</a>  | RIKEN cDNA 4930517O19 gene     | <a href="#">4930517O19Rik</a> | 1.382 | 2.503 | 0.0398649   | 0.173611   |
| 1265 | 10370242 | <a href="#">NM_021568</a>          | <a href="#">59093</a>  | poly(rC) binding protein 3     | <a href="#">Pcbp3</a>         | 1.382 | 3.877 | 0.0057321   | 0.0455152  |
| 1266 | 10515242 | <a href="#">NM_028142</a>          | <a href="#">72181</a>  | NOL1/NOP2/Sun domain family, m | <a href="#">Nsun4</a>         | 1.382 | 3.677 | 0.00748982  | 0.0554304  |
| 1267 | 10469066 | <a href="#">NM_028804</a>          | <a href="#">74186</a>  | coiled-coil domain containing  | <a href="#">Ccdc3</a>         | 1.381 | 2.736 | 0.0282709   | 0.137931   |
| 1268 | 10419704 | <a href="#">NM_015772</a>          | <a href="#">50524</a>  | sal-like 2 (Drosophila)        | <a href="#">Sall2</a>         | 1.381 | 2.619 | 0.0335624   | 0.154498   |
| 1269 | 10590452 | <a href="#">NM_026179</a>          | <a href="#">67469</a>  | abhydrolase domain containing  | <a href="#">Abhd5</a>         | 1.381 | 5.638 | 0.000706229 | 0.0103196  |
| 1270 | 10591614 | <a href="#">NM_177030</a>          | <a href="#">319899</a> | dedicator of cytokinesis 6     | <a href="#">Dock6</a>         | 1.38  | 2.833 | 0.0245339   | 0.125878   |
| 1271 | 10363350 | <a href="#">NM_011030</a>          | <a href="#">18451</a>  | procollagen-proline, 2-oxoglut | <a href="#">P4ha1</a>         | 1.38  | 4.516 | 0.00254749  | 0.0257354  |
| 1272 | 10388465 | <a href="#">NM_007873</a>          | <a href="#">13447</a>  | double C2, beta                | <a href="#">Doc2b</a>         | 1.38  | 3.369 | 0.0114175   | 0.0742122  |
| 1273 | 10431749 | <a href="#">NM_177431</a>          | <a href="#">223838</a> | a disintegrin-like and metallo | <a href="#">Adamts20</a>      | 1.38  | 6.484 | 0.000298851 | 0.00571329 |
| 1274 | 10491611 | <a href="#">ENSMUST00000057272</a> | <a href="#">229227</a> | RIKEN cDNA 4932438A13 gene     | <a href="#">4932438A13Rik</a> | 1.38  | 3.22  | 0.0140659   | 0.0861304  |
| 1275 | 10404913 | <a href="#">NM_026056</a>          | <a href="#">67252</a>  | CAP, adenylate cyclase-associa | <a href="#">Cap2</a>          | 1.379 | 2.658 | 0.031678    | 0.149043   |
| 1276 | 10360377 | <a href="#">ENSMUST00000042610</a> | <a href="#">226691</a> | expressed sequence AI607873    | <a href="#">A1607873</a>      | 1.379 | 2.578 | 0.035654    | 0.160842   |
| 1277 | 10360863 | <a href="#">NM_145515</a>          | <a href="#">226778</a> | MAP/microtubule affinity-regul | <a href="#">Mark1</a>         | 1.379 | 4.814 | 0.001781    | 0.0197989  |
| 1278 | 10515771 | <a href="#">NM_011587</a>          | <a href="#">21846</a>  | tyrosine kinase receptor 1     | <a href="#">Tie1</a>          | 1.379 | 6.443 | 0.000310997 | 0.00584508 |
| 1279 | 10568735 | <a href="#">NM_001113415</a>       | <a href="#">13593</a>  | early B-cell factor 3          | <a href="#">Ebf3</a>          | 1.378 | 2.169 | 0.065578    | 0.2387     |
| 1280 | 10449284 | <a href="#">NM_013642</a>          | <a href="#">19252</a>  | dual specificity phosphatase 1 | <a href="#">Dusp1</a>         | 1.378 | 4.397 | 0.00294941  | 0.0284299  |
| 1281 | 10406504 | <a href="#">NM_001037987</a>       | <a href="#">13612</a>  | EGF-like repeats and discoidin | <a href="#">Edil3</a>         | 1.378 | 2.112 | 0.0714098   | 0.250979   |
| 1282 | 10462132 | <a href="#">BC087877</a>           | <a href="#">226040</a> | RIKEN cDNA E030010A14 gene     | <a href="#">E030010A14Rik</a> | 1.378 | 4.031 | 0.00468908  | 0.0393749  |

|      |          |                                    |                        |                                |                               |       |       |             |            |
|------|----------|------------------------------------|------------------------|--------------------------------|-------------------------------|-------|-------|-------------|------------|
| 1283 | 10415413 | <a href="#">BC057379</a>           | <a href="#">277124</a> | cDNA sequence BC050040         | <a href="#">BC050040</a>      | 1.578 | 2.038 | 0.0520389   | 0.151807   |
| 1284 | 10359161 | <a href="#">NM_009230</a>          | <a href="#">20652</a>  | sterol O-acyltransferase 1     | <a href="#">Soat1</a>         | 1.378 | 5.779 | 0.000608161 | 0.00929788 |
| 1285 | 10606088 | <a href="#">NM_027382</a>          | <a href="#">70315</a>  | histone deacetylase 8          | <a href="#">Hdac8</a>         | 1.377 | 5.038 | 0.00137144  | 0.0164386  |
| 1286 | 10483439 | <a href="#">NM_001081088</a>       | <a href="#">14725</a>  | low density lipoprotein recept | <a href="#">Lrp2</a>          | 1.377 | 5.226 | 0.00110802  | 0.0140963  |
| 1287 | 10535034 | <a href="#">NM_013844</a>          | <a href="#">24135</a>  | zinc finger protein 68         | <a href="#">Zfp68</a>         | 1.377 | 5.216 | 0.0011213   | 0.0142129  |
| 1288 | 10371844 |                                    |                        |                                |                               | 1.377 | 3.827 | 0.006126    | 0.0475856  |
| 1289 | 10375055 | <a href="#">NM_001033981</a>       | <a href="#">544763</a> | RIKEN cDNA F830116E18 gene     | <a href="#">F830116E18Rik</a> | 1.377 | 2.041 | 0.0794613   | 0.268434   |
| 1290 | 10390117 | <a href="#">NM_013565</a>          | <a href="#">16400</a>  | integrin alpha 3               | <a href="#">Itga3</a>         | 1.377 | 3.599 | 0.0083186   | 0.0595022  |
| 1291 | 10422013 | <a href="#">NM_010636</a>          | <a href="#">16597</a>  | Kruppel-like factor 12         | <a href="#">Klf12</a>         | 1.377 | 2.871 | 0.0231991   | 0.120967   |
| 1292 | 10373407 | <a href="#">NM_011843</a>          | <a href="#">23943</a>  | membrane bound C2 domain conta | <a href="#">Mbc2</a>          | 1.377 | 6.177 | 0.000404553 | 0.00699418 |
| 1293 | 10604528 | <a href="#">NM_134163</a>          | <a href="#">171170</a> | muscleblind-like 3 (Drosophila | <a href="#">Mbnl3</a>         | 1.376 | 2.206 | 0.0620841   | 0.23034    |
| 1294 | 10458555 | <a href="#">NM_011898</a>          | <a href="#">24066</a>  | sprouty homolog 4 (Drosophila) | <a href="#">Spry4</a>         | 1.376 | 3.53  | 0.00914348  | 0.0636925  |
| 1295 | 10604523 | <a href="#">NM_172413</a>          | <a href="#">72065</a>  | RAP2C, member of RAS oncogene  | <a href="#">Rap2c</a>         | 1.376 | 4.864 | 0.00167857  | 0.0188786  |
| 1296 | 10531173 | <a href="#">NM_001081401</a>       | <a href="#">330119</a> | a disintegrin-like and metallo | <a href="#">Adamts3</a>       | 1.376 | 1.99  | 0.0856231   | 0.280865   |
| 1297 | 10457888 | <a href="#">BC080777</a>           | <a href="#">66648</a>  | RIKEN cDNA 5730494M16 gene     | <a href="#">5730494M16Rik</a> | 1.376 | 5.492 | 0.000826532 | 0.011499   |
| 1298 | 10467979 | <a href="#">NM_009127</a>          | <a href="#">20249</a>  | stearoyl-Coenzyme A desaturase | <a href="#">Scd1</a>          | 1.376 | 3.143 | 0.0156916   | 0.0930667  |
| 1299 | 10507612 | <a href="#">NM_019783</a>          | <a href="#">56401</a>  | leprecan 1                     | <a href="#">Leprel</a>        | 1.375 | 3.956 | 0.00517212  | 0.0422494  |
| 1300 | 10387100 | <a href="#">NM_001034874</a>       | <a href="#">380702</a> | gene model 879, (NCBI)         | <a href="#">Gm879</a>         | 1.375 | 6.502 | 0.000293707 | 0.00565571 |
| 1301 | 10403842 | <a href="#">NM_080288</a>          | <a href="#">140580</a> | engulfment and cell motility 1 | <a href="#">Elmo1</a>         | 1.375 | 2.62  | 0.0335219   | 0.154383   |
| 1302 | 10606366 | <a href="#">NM_199468</a>          | <a href="#">213436</a> | zinc finger, CCHC domain conta | <a href="#">Zcchc5</a>        | 1.375 | 2.59  | 0.0350549   | 0.159056   |
| 1303 | 10530145 | <a href="#">NM_030682</a>          | <a href="#">21897</a>  | toll-like receptor 1           | <a href="#">Tlr1</a>          | 1.375 | 3.133 | 0.0159157   | 0.0941049  |
| 1304 | 10543494 | <a href="#">NM_008174</a>          | <a href="#">14823</a>  | glutamate receptor, metabotrop | <a href="#">Grm8</a>          | 1.374 | 3.51  | 0.00939155  | 0.0648938  |
| 1305 | 10500938 | <a href="#">NM_009520</a>          | <a href="#">22414</a>  | wingless related MMTV integrat | <a href="#">Wnt2b</a>         | 1.374 | 3.808 | 0.00627962  | 0.0485116  |
| 1306 | 10430510 | <a href="#">NM_172608</a>          | <a href="#">223693</a> | transmembrane protein 184b     | <a href="#">Tmem184b</a>      | 1.374 | 3.731 | 0.00695942  | 0.0523107  |
| 1307 | 10502766 | <a href="#">NM_001081298</a>       | <a href="#">99633</a>  | latrophilin 2                  | <a href="#">Lphn2</a>         | 1.374 | 1.938 | 0.0926014   | 0.294729   |
| 1308 | 10412260 | <a href="#">NM_008046</a>          | <a href="#">14313</a>  | follistatin                    | <a href="#">Fst</a>           | 1.374 | 1.03  | 0.336202    | 0.611869   |
| 1309 | 10402117 | <a href="#">NM_153587</a>          | <a href="#">73086</a>  | ribosomal protein S6 kinase, p | <a href="#">Rps6ka5</a>       | 1.374 | 4.555 | 0.002427    | 0.0249473  |
| 1310 | 10368317 | <a href="#">NM_134005</a>          | <a href="#">209558</a> | ectonucleotide pyrophosphatase | <a href="#">Enpp3</a>         | 1.374 | 1.603 | 0.151783    | 0.395645   |
| 1311 | 10436209 | <a href="#">NM_001033238</a>       | <a href="#">208650</a> | Casitas B-lineage lymphoma b   | <a href="#">Chlb</a>          | 1.373 | 3.287 | 0.0128076   | 0.0805725  |
| 1312 | 10552500 | <a href="#">NM_008940</a>          | <a href="#">259277</a> | kallikrein related-peptidase 8 | <a href="#">Klk8</a>          | 1.372 | 2.449 | 0.0432127   | 0.182644   |
| 1313 | 10599686 | <a href="#">NM_030139</a>          | <a href="#">78619</a>  | zinc finger protein 449        | <a href="#">Zfp449</a>        | 1.372 | 6.227 | 0.000384606 | 0.00674304 |
| 1314 | 10519486 |                                    |                        |                                |                               | 1.372 | 2.595 | 0.0347915   | 0.158375   |
| 1315 | 10519607 | <a href="#">NM_001081029</a>       | <a href="#">652925</a> | RIKEN cDNA 4930420K17 gene     | <a href="#">4930420K17Rik</a> | 1.372 | 3.724 | 0.00702919  | 0.0527601  |
| 1316 | 10532711 | <a href="#">NM_008153</a>          | <a href="#">14747</a>  | chemokine-like receptor 1      | <a href="#">Cmklr1</a>        | 1.372 | 5.576 | 0.000754967 | 0.0108152  |
| 1317 | 10462281 | <a href="#">NM_013703</a>          | <a href="#">22359</a>  | very low density lipoprotein r | <a href="#">Vldlr</a>         | 1.372 | 4.146 | 0.00404716  | 0.0353025  |
| 1318 | 10432236 | <a href="#">NM_172612</a>          | <a href="#">223881</a> | Rho family GTPase 1            | <a href="#">Rnd1</a>          | 1.371 | 3.965 | 0.00511037  | 0.0418975  |
| 1319 | 10592140 | <a href="#">NM_013932</a>          | <a href="#">30959</a>  | DEAD (Asp-Glu-Ala-Asp) box pol | <a href="#">Ddx25</a>         | 1.369 | 3.244 | 0.0136043   | 0.0841821  |
| 1320 | 10412328 | <a href="#">NM_134058</a>          | <a href="#">105083</a> | pelota homolog (Drosophila)    | <a href="#">Pelo</a>          | 1.369 | 4.286 | 0.00338816  | 0.0310934  |
| 1321 | 10392177 | <a href="#">NM_010494</a>          | <a href="#">15896</a>  | intercellular adhesion molecul | <a href="#">Icam2</a>         | 1.369 | 3.21  | 0.0142731   | 0.0871222  |
| 1322 | 10574488 | <a href="#">NM_001024606</a>       | <a href="#">382051</a> | RIKEN cDNA 4833426J09 gene     | <a href="#">4833426J09Rik</a> | 1.369 | 4.164 | 0.00395283  | 0.0346513  |
| 1323 | 10350247 | <a href="#">NM_001039472</a>       | <a href="#">16565</a>  | kinesin family member 21B      | <a href="#">Kif21b</a>        | 1.369 | 4.648 | 0.0021706   | 0.0231093  |
| 1324 | 10491331 | <a href="#">NM_008839</a>          | <a href="#">18706</a>  | phosphatidylinositol 3-kinase, | <a href="#">Pik3ca</a>        | 1.369 | 5.592 | 0.000741768 | 0.0106912  |
| 1325 | 10547621 | <a href="#">NM_031159</a>          | <a href="#">11810</a>  | apolipoprotein B editing compl | <a href="#">Apobec1</a>       | 1.369 | 3.095 | 0.0168006   | 0.0975911  |
| 1326 | 10476237 | <a href="#">NM_028306</a>          | <a href="#">72630</a>  | heat shock protein 12B         | <a href="#">Hspa12b</a>       | 1.368 | 4.843 | 0.00172084  | 0.0192617  |
| 1327 | 10467206 | <a href="#">NM_016854</a>          | <a href="#">53412</a>  | protein phosphatase 1, regulat | <a href="#">Ppp1r3c</a>       | 1.368 | 2.437 | 0.0439879   | 0.184833   |
| 1328 | 10474700 | <a href="#">NM_011580</a>          | <a href="#">21825</a>  | thrombospondin 1               | <a href="#">Thbs1</a>         | 1.368 | 2.273 | 0.0561555   | 0.216623   |
| 1329 | 10381096 | <a href="#">NM_010517</a>          | <a href="#">16010</a>  | insulin-like growth factor bin | <a href="#">Igfbp4</a>        | 1.368 | 5.02  | 0.00140011  | 0.016658   |
| 1330 | 10509901 | <a href="#">NM_008546</a>          | <a href="#">17150</a>  | microfibrillar-associated prot | <a href="#">Mfap2</a>         | 1.368 | 5.056 | 0.00134434  | 0.0162056  |
| 1331 | 10605465 | <a href="#">NM_016979</a>          | <a href="#">19108</a>  | protein kinase, X-linked       | <a href="#">Prkx</a>          | 1.367 | 1.992 | 0.0854322   | 0.280581   |
| 1332 | 10399337 | <a href="#">BC145748</a>           | <a href="#">208439</a> | kelch-like 29 (Drosophila)     | <a href="#">Klhl29</a>        | 1.366 | 5.262 | 0.00106464  | 0.0137094  |
| 1333 | 10502535 |                                    |                        |                                |                               | 1.366 | 3.188 | 0.0147262   | 0.0890395  |
| 1334 | 10348299 | <a href="#">ENSMUST00000097661</a> | <a href="#">76104</a>  | RIKEN cDNA 5830472F04 gene     | <a href="#">5830472F04Rik</a> | 1.366 | 1.555 | 0.162693    | 0.411384   |
|      |          |                                    |                        | predicted gene                 |                               |       |       |             |            |

|      |          |                                    |                           |                                   |                                    |       |       |             |            |
|------|----------|------------------------------------|---------------------------|-----------------------------------|------------------------------------|-------|-------|-------------|------------|
| 1335 | 10446470 | <a href="#">ENSMUST00000069605</a> | <a href="#">791265</a>    | predicted gene,<br>ENSMUSG0000005 | <a href="#">ENSMUSG00000055855</a> | 1.366 | 1.776 | 0.117793    | 0.3424     |
| 1336 | 10456756 | <a href="#">NM_145356</a>          | <a href="#">207259</a>    | zinc finger and BTB domain con    | <a href="#">Zbtb7c</a>             | 1.366 | 4.542 | 0.00246728  | 0.0252264  |
| 1337 | 10607587 | <a href="#">NM_008810</a>          | <a href="#">18597</a>     | pyruvate dehydrogenase E1 alph    | <a href="#">Pdha1</a>              | 1.366 | 4.566 | 0.00239479  | 0.0246761  |
| 1338 | 10548146 | <a href="#">NM_011567</a>          | <a href="#">21679</a>     | TEA domain family member 4        | <a href="#">Tead4</a>              | 1.366 | 4.488 | 0.00263406  | 0.0263956  |
| 1339 | 10373340 | <a href="#">NM_001039080</a>       | <a href="#">56516</a>     | RNA binding motif, single stra    | <a href="#">Rbms2</a>              | 1.365 | 4.379 | 0.00301486  | 0.0288575  |
| 1340 | 10435266 | <a href="#">NM_172934</a>          | <a href="#">77446</a>     | HEG homolog 1 (zebrafish)         | <a href="#">Heg1</a>               | 1.365 | 4.666 | 0.00212324  | 0.022731   |
| 1341 | 10413280 |                                    |                           |                                   |                                    | 1.365 | 1.7   | 0.131579    | 0.364342   |
| 1342 | 10374464 | <a href="#">BC040462</a>           | <a href="#">114716</a>    | sprouty-related, EVH1 domain c    | <a href="#">Spred2</a>             | 1.364 | 3.189 | 0.0147032   | 0.0889767  |
| 1343 | 10372082 | <a href="#">NM_027722</a>          | <a href="#">71207</a>     | nudix (nucleoside diphosphate     | <a href="#">Nudt4</a>              | 1.364 | 3.014 | 0.0188658   | 0.105433   |
| 1344 | 10489377 | <a href="#">NM_012032</a>          | <a href="#">26943</a>     | serine incorporator 3             | <a href="#">Serinc3</a>            | 1.363 | 3.749 | 0.00679628  | 0.0513767  |
| 1345 | 10455128 | <a href="#">NM_053145</a>          | <a href="#">93891</a>     | protocadherin beta 20             | <a href="#">Pcdhb20</a>            | 1.363 | 2.193 | 0.0632656   | 0.233168   |
| 1346 | 10601846 | <a href="#">NR_003642</a>          | <a href="#">76976</a>     | RIKEN cDNA 2900062L11 gene        | <a href="#">2900062L11Rik</a>      | 1.363 | 3.296 | 0.0126385   | 0.0796771  |
| 1347 | 10422348 | <a href="#">NM_001081252</a>       | <a href="#">66435</a>     | UDP-glucose ceramide glucosylt    | <a href="#">Ugcg12</a>             | 1.363 | 3.319 | 0.0122475   | 0.0778362  |
| 1348 | 10538299 | <a href="#">BC094279</a>           | <a href="#">66640</a>     | RIKEN cDNA 5730446D14<br>gene     | <a href="#">5730446D14Rik</a>      | 1.363 | 3.794 | 0.00639892  | 0.0491     |
| 1349 | 10463739 | <a href="#">NM_177342</a>          | <a href="#">226182</a>    | TAF5 RNA polymerase II,<br>TATA b | <a href="#">Taf5</a>               | 1.363 | 3.955 | 0.00517378  | 0.0422494  |
| 1350 | 10357488 | <a href="#">NM_010016</a>          | <a href="#">13136</a>     | CD55 antigen                      | <a href="#">Cd55</a>               | 1.363 | 2.022 | 0.0816819   | 0.272831   |
| 1351 | 10433709 | <a href="#">BC022741</a>           | <a href="#">67254</a>     | RIKEN cDNA 2900011O08<br>gene     | <a href="#">2900011O08Rik</a>      | 1.362 | 2.747 | 0.027809    | 0.136658   |
| 1352 | 10400795 | <a href="#">NM_022028</a>          | <a href="#">64010</a>     | salvador homolog 1 (Drosophila    | <a href="#">Sav1</a>               | 1.362 | 4.892 | 0.00162488  | 0.0184613  |
| 1353 | 10585214 | <a href="#">NM_009964</a>          | <a href="#">12955</a>     | crystallin, alpha B               | <a href="#">Cryab</a>              | 1.362 | 3.097 | 0.0167476   | 0.0974437  |
| 1354 | 10527963 |                                    |                           |                                   |                                    | 1.361 | 3.798 | 0.00636712  | 0.0490085  |
| 1355 | 10502823 | <a href="#">NM_025926</a>          | <a href="#">67035</a>     | DnaJ (Hsp40) homolog, subfamil    | <a href="#">Dnajb4</a>             | 1.361 | 4.598 | 0.00230434  | 0.0240488  |
| 1356 | 10459363 | <a href="#">ENSMUST00000046860</a> | <a href="#">667742</a>    | RIKEN cDNA 9030411M15<br>gene     | <a href="#">9030411M15Rik</a>      | 1.36  | 4.091 | 0.00433796  | 0.0370043  |
| 1357 | 10414333 | <a href="#">NM_001037221</a>       | <a href="#">74480</a>     | sterile alpha motif domain con    | <a href="#">Samd4</a>              | 1.36  | 3.617 | 0.00811667  | 0.0585528  |
| 1358 | 10495405 | <a href="#">NM_172685</a>          | <a href="#">229731</a>    | solute carrier family 25 (mito    | <a href="#">Slc25a24</a>           | 1.36  | 3.826 | 0.00613101  | 0.0476028  |
| 1359 | 10362676 | <a href="#">NM_198164</a>          | <a href="#">78334</a>     | cell division cycle 2-like 6 (    | <a href="#">Cdc216</a>             | 1.359 | 6.819 | 0.000217696 | 0.00468735 |
| 1360 | 10580056 | <a href="#">ENSMUST00000098595</a> | <a href="#">100126034</a> | predicted gene,<br>ENSMUSG0000007 | <a href="#">ENSMUSG00000074219</a> | 1.359 | 5.465 | 0.000851368 | 0.0116881  |
| 1361 | 10584674 | <a href="#">NM_023061</a>          | <a href="#">84004</a>     | melanoma cell adhesion molecul    | <a href="#">Mcam</a>               | 1.358 | 7.32  | 0.000138309 | 0.00342078 |
| 1362 | 10412667 | <a href="#">NM_008981</a>          | <a href="#">19270</a>     | protein tyrosine phosphatase,     | <a href="#">Ptrpg</a>              | 1.358 | 2.663 | 0.0314534   | 0.14825    |
| 1363 | 10473349 | <a href="#">NM_001005342</a>       | <a href="#">241525</a>    | yippee-like 4 (Drosophila)        | <a href="#">Ypel4</a>              | 1.358 | 3.157 | 0.0153844   | 0.0920839  |
| 1364 | 10366043 | <a href="#">NM_026268</a>          | <a href="#">67603</a>     | dual specificity phosphatase 6    | <a href="#">Dusp6</a>              | 1.358 | 2.746 | 0.0278324   | 0.136699   |
| 1365 | 10446771 | <a href="#">NM_001081071</a>       | <a href="#">225010</a>    | lysocardiolipin acyltransferas    | <a href="#">Lycat</a>              | 1.358 | 4.287 | 0.00338439  | 0.0310771  |
| 1366 | 10360370 | <a href="#">NM_001024721</a>       | <a href="#">545384</a>    | cDNA sequence BC094916            | <a href="#">BC094916</a>           | 1.358 | 1.707 | 0.13032     | 0.362088   |
| 1367 | 10363703 |                                    |                           |                                   |                                    | 1.358 | 5.83  | 0.000576732 | 0.00896649 |
| 1368 | 10523490 | <a href="#">NM_010203</a>          | <a href="#">14176</a>     | fibroblast growth factor 5        | <a href="#">Fgf5</a>               | 1.357 | 6.064 | 0.000453237 | 0.00756735 |
| 1369 | 10436666 | <a href="#">NM_023844</a>          | <a href="#">67374</a>     | junction adhesion molecule 2      | <a href="#">Jam2</a>               | 1.357 | 3.972 | 0.00506514  | 0.0416883  |
| 1370 | 10492499 | <a href="#">NM_025813</a>          | <a href="#">66868</a>     | major facilitator superfamily     | <a href="#">Mfsd1</a>              | 1.357 | 6.826 | 0.000216203 | 0.00466946 |
| 1371 | 10459905 | <a href="#">NM_053099</a>          | <a href="#">240427</a>    | SET binding protein 1             | <a href="#">Setbp1</a>             | 1.356 | 5.044 | 0.00136326  | 0.0163592  |
| 1372 | 10348739 | <a href="#">NM_172463</a>          | <a href="#">208777</a>    | sushi, nidogen and EGF-like do    | <a href="#">Sned1</a>              | 1.356 | 4.569 | 0.00238822  | 0.024654   |
| 1373 | 10545255 | <a href="#">NM_009075</a>          | <a href="#">19895</a>     | ribose 5-phosphate isomerase A    | <a href="#">Rpia</a>               | 1.356 | 2.561 | 0.0365517   | 0.163532   |
| 1374 | 10598251 | <a href="#">NM_177914</a>          | <a href="#">331374</a>    | diacylglycerol kinase kappa       | <a href="#">Dgkk</a>               | 1.356 | 3.692 | 0.00733603  | 0.0545596  |
| 1375 | 10412414 | <a href="#">ENSMUST00000048965</a> | <a href="#">791300</a>    | predicted gene,<br>ENSMUSG0000002 | <a href="#">ENSMUSG00000025450</a> | 1.355 | 2.282 | 0.0554057   | 0.214717   |
| 1376 | 10472097 | <a href="#">NM_172409</a>          | <a href="#">71409</a>     | formin-like 2                     | <a href="#">Fmnl2</a>              | 1.355 | 4.209 | 0.00373118  | 0.0332773  |
| 1377 | 10608138 | <a href="#">NM_012008</a>          | <a href="#">26900</a>     | DEAD (Asp-Glu-Ala-Asp) box<br>pol | <a href="#">Ddx3y</a>              | 1.355 | 0.601 | 0.566164    | 0.792202   |
| 1378 | 10345981 | <a href="#">NM_011729</a>          | <a href="#">22592</a>     | excision repair cross-compleme    | <a href="#">Erc5</a>               | 1.355 | 5.218 | 0.00111832  | 0.0141847  |
| 1379 | 10454601 | <a href="#">NM_021367</a>          | <a href="#">53603</a>     | thymic stromal lymphopoietin      | <a href="#">Tslp</a>               | 1.355 | 1.574 | 0.158323    | 0.405255   |
| 1380 | 10426425 | <a href="#">ENSMUST00000035399</a> | <a href="#">239618</a>    | PDZ domain containing RING<br>fin | <a href="#">Pdzrn4</a>             | 1.355 | 3.65  | 0.00776176  | 0.0567966  |
| 1381 | 10455253 | <a href="#">NM_001033789</a>       | <a href="#">545253</a>    | predicted gene, EG545253          | <a href="#">EG545253</a>           | 1.355 | 5.783 | 0.000605562 | 0.00926484 |
| 1382 | 10462406 | <a href="#">BC125448</a>           | <a href="#">226089</a>    | RIKEN cDNA C030046E11<br>gene     | <a href="#">C030046E11Rik</a>      | 1.354 | 3.795 | 0.00639256  | 0.0490793  |
| 1383 | 10501903 | <a href="#">ENSMUST00000051443</a> | <a href="#">118449</a>    | synaptopodin 2                    | <a href="#">Synpo2</a>             | 1.354 | 2.269 | 0.0564657   | 0.217193   |
|      |          |                                    |                           | EL AV (embryonic lethal           |                                    |       |       |             |            |

|      |          |                                    |                           |                                         |                               |       |       |             |            |
|------|----------|------------------------------------|---------------------------|-----------------------------------------|-------------------------------|-------|-------|-------------|------------|
| 1384 | 10514352 | <a href="#">NM_207685</a>          | <a href="#">15569</a>     | BTB (POZ) domain containing 7<br>abnorm | <a href="#">Elavl2</a>        | 1.354 | 4.223 | 0.00366883  | 0.0328981  |
| 1385 | 10402302 | <a href="#">NM_172806</a>          | <a href="#">238386</a>    | BTB (POZ) domain containing 7           | <a href="#">Btbd7</a>         | 1.353 | 5.59  | 0.000743176 | 0.0107042  |
| 1386 | 10494372 | <a href="#">NM_022030</a>          | <a href="#">64051</a>     | synaptic vesicle glycoprotein           | <a href="#">Sv2a</a>          | 1.353 | 3.597 | 0.00834739  | 0.0596476  |
| 1387 | 10544452 | <a href="#">BC011487</a>           | <a href="#">232748</a>    | cDNA sequence BC011487                  | <a href="#">BC011487</a>      | 1.353 | 2.869 | 0.0232702   | 0.121189   |
| 1388 | 10519516 | <a href="#">NM_178766</a>          | <a href="#">319653</a>    | solute carrier family 25, memb          | <a href="#">Slc25a40</a>      | 1.353 | 2.578 | 0.0356699   | 0.16088    |
| 1389 | 10585874 | <a href="#">NM_010421</a>          | <a href="#">15211</a>     | hexosaminidase A                        | <a href="#">Hexa</a>          | 1.353 | 3.078 | 0.0172111   | 0.0991856  |
| 1390 | 10404836 | <a href="#">NM_183204</a>          | <a href="#">328234</a>    | ring finger protein 182                 | <a href="#">Rnf182</a>        | 1.353 | 2.722 | 0.028847    | 0.139575   |
| 1391 | 10545200 | <a href="#">ENSMUST00000101325</a> | <a href="#">100046894</a> | similar to Igk-C protein                | <a href="#">LOC100046894</a>  | 1.353 | 2.391 | 0.047077    | 0.192832   |
| 1392 | 10407173 | <a href="#">NM_010560</a>          | <a href="#">16195</a>     | interleukin 6 signal transduce          | <a href="#">Il6st</a>         | 1.353 | 4.403 | 0.00292642  | 0.028306   |
| 1393 | 10400157 | <a href="#">ENSMUST00000021438</a> | <a href="#">664883</a>    | neuro-oncological ventral anti          | <a href="#">Nova1</a>         | 1.352 | 4.261 | 0.00349606  | 0.0317517  |
| 1394 | 10488623 | <a href="#">NM_011438</a>          | <a href="#">20667</a>     | SRY-box containing gene 12              | <a href="#">Sox12</a>         | 1.351 | 4.836 | 0.00173452  | 0.0193636  |
| 1395 | 10420009 |                                    |                           |                                         |                               | 1.35  | 1.493 | 0.17772     | 0.43217    |
| 1396 | 10422028 | <a href="#">NM_001081278</a>       | <a href="#">210789</a>    | TBC1 domain family, member 4            | <a href="#">Tbc1d4</a>        | 1.35  | 2.826 | 0.0247788   | 0.12668    |
| 1397 | 10427895 | <a href="#">NM_027395</a>          | <a href="#">70350</a>     | brain abundant, membrane attac          | <a href="#">Basp1</a>         | 1.349 | 6.35  | 0.000340515 | 0.00618013 |
| 1398 | 10459288 | <a href="#">NM_007420</a>          | <a href="#">11555</a>     | adrenergic receptor, beta 2             | <a href="#">Adrb2</a>         | 1.349 | 3.626 | 0.00802247  | 0.0581313  |
| 1399 | 10501699 | <a href="#">NM_001081326</a>       | <a href="#">77559</a>     | amylo-1,6-glucosidase, 4-alpha          | <a href="#">Agl</a>           | 1.349 | 4.45  | 0.00276056  | 0.0273085  |
| 1400 | 10482509 | <a href="#">NM_030243</a>          | <a href="#">71684</a>     | RNA binding motif protein 43            | <a href="#">Rbm43</a>         | 1.349 | 2.777 | 0.0266026   | 0.132599   |
| 1401 | 10483803 | <a href="#">ENSMUST00000100000</a> | <a href="#">399588</a>    | RIKEN cDNA 6720416L17 gene              | <a href="#">6720416L17Rik</a> | 1.348 | 2.391 | 0.0470429   | 0.192831   |
| 1402 | 10368050 | <a href="#">ENSMUST00000095817</a> | <a href="#">100039660</a> | hypothetical protein LOC100039          | <a href="#">LOC100039660</a>  | 1.348 | 1.43  | 0.194451    | 0.454557   |
| 1403 | 10400805 | <a href="#">NM_008697</a>          | <a href="#">18080</a>     | ninein                                  | <a href="#">Nin</a>           | 1.348 | 3.856 | 0.00589363  | 0.0464288  |
| 1404 | 10582376 |                                    |                           |                                         |                               | 1.348 | 1.341 | 0.220694    | 0.489689   |
| 1405 | 10498576 | <a href="#">NM_016753</a>          | <a href="#">17035</a>     | latexin                                 | <a href="#">Lxn</a>           | 1.348 | 2.532 | 0.0381714   | 0.168848   |
| 1406 | 10542164 | <a href="#">NM_177686</a>          | <a href="#">232413</a>    | C-type lectin domain family 12          | <a href="#">Clec12a</a>       | 1.348 | 4.006 | 0.0048448   | 0.0403004  |
| 1407 | 10461794 | <a href="#">NM_146302</a>          | <a href="#">258299</a>    | olfactory receptor 1461                 | <a href="#">Olfr1461</a>      | 1.347 | 1.897 | 0.0984752   | 0.30638    |
| 1408 | 10490826 | <a href="#">ENSMUST00000091353</a> | <a href="#">229055</a>    | zinc finger and BTB domain con          | <a href="#">Zbtb10</a>        | 1.347 | 2.027 | 0.0810588   | 0.271716   |
| 1409 | 10445428 |                                    |                           |                                         |                               | 1.347 | 1.027 | 0.337587    | 0.613173   |
| 1410 | 10458498 | <a href="#">NM_139206</a>          | <a href="#">106952</a>    | centaurin, delta 3                      | <a href="#">Centd3</a>        | 1.347 | 6.699 | 0.000243416 | 0.00502386 |
| 1411 | 10600093 | <a href="#">NM_009549</a>          | <a href="#">22673</a>     | zinc finger protein 185                 | <a href="#">Zfp185</a>        | 1.347 | 3.908 | 0.00550367  | 0.0442639  |
| 1412 | 10373768 | <a href="#">NM_053267</a>          | <a href="#">114679</a>    | selenoprotein M                         | <a href="#">Selm</a>          | 1.347 | 3.35  | 0.0117205   | 0.0755777  |
| 1413 | 10607972 | <a href="#">NM_011419</a>          | <a href="#">20592</a>     | jumonji, AT rich interactive d          | <a href="#">Jarid1d</a>       | 1.347 | 0.629 | 0.548937    | 0.77934    |
| 1414 | 10585970 |                                    |                           |                                         |                               | 1.347 | 3.208 | 0.0143183   | 0.0873729  |
| 1415 | 10372342 | <a href="#">NM_001081035</a>       | <a href="#">260315</a>    | neuron navigator 3                      | <a href="#">Nav3</a>          | 1.347 | 4.368 | 0.00305675  | 0.0290664  |
| 1416 | 10531193 | <a href="#">NM_001081401</a>       | <a href="#">330119</a>    | a disintegrin-like and metallo          | <a href="#">Adamts3</a>       | 1.347 | 4.54  | 0.00247388  | 0.0252694  |
| 1417 | 10366026 | <a href="#">NM_027740</a>          | <a href="#">382406</a>    | WD repeat domain 51B                    | <a href="#">Wdr51b</a>        | 1.346 | 2.541 | 0.0376747   | 0.167387   |
| 1418 | 10445293 | <a href="#">NM_013737</a>          | <a href="#">27226</a>     | phospholipase A2, group VII (p          | <a href="#">Pla2g7</a>        | 1.345 | 3.634 | 0.00793778  | 0.0577154  |
| 1419 | 10407591 | <a href="#">NM_033269</a>          | <a href="#">12671</a>     | cholinergic receptor, muscarin          | <a href="#">Chrm3</a>         | 1.345 | 1.548 | 0.164201    | 0.413859   |
| 1420 | 10543204 | <a href="#">NM_028990</a>          | <a href="#">101118</a>    | transmembrane protein 168               | <a href="#">Tmem168</a>       | 1.345 | 2.86  | 0.0235594   | 0.122123   |
| 1421 | 10434302 | <a href="#">NM_029436</a>          | <a href="#">75785</a>     | kelch-like 24 (Drosophila)              | <a href="#">Khl24</a>         | 1.344 | 3.946 | 0.00523657  | 0.0426339  |
| 1422 | 10389894 | <a href="#">NM_029600</a>          | <a href="#">76408</a>     | ATP-binding cassette, sub-fami          | <a href="#">Abcc3</a>         | 1.344 | 4.447 | 0.00277237  | 0.0273478  |
| 1423 | 10349943 |                                    |                           |                                         |                               | 1.344 | 0.62  | 0.554066    | 0.783409   |
| 1424 | 10570516 | <a href="#">BC080858</a>           | <a href="#">74901</a>     | kelch repeat and BTB (POZ)<br>dom       | <a href="#">Kbtbd11</a>       | 1.343 | 3.04  | 0.0181875   | 0.102607   |
| 1425 | 10505674 | <a href="#">NM_175275</a>          | <a href="#">338349</a>    | centlein, centrosomal protein           | <a href="#">Cntln</a>         | 1.343 | 4.075 | 0.00443043  | 0.037576   |
| 1426 | 10428998 | <a href="#">NM_010026</a>          | <a href="#">13196</a>     | development and differentiatio          | <a href="#">Ddef1</a>         | 1.343 | 5.383 | 0.000930473 | 0.0124993  |
| 1427 | 10561351 | <a href="#">ENSMUST00000099111</a> | <a href="#">233026</a>    | RIKEN cDNA C130069I09 gene              | <a href="#">C130069I09Rik</a> | 1.343 | 2.789 | 0.0261387   | 0.130964   |
| 1428 | 10401063 | <a href="#">NM_028356</a>          | <a href="#">109929</a>    | zinc finger and BTB domain con          | <a href="#">Zbtb25</a>        | 1.343 | 3.398 | 0.0109674   | 0.0722269  |
| 1429 | 10374485 | <a href="#">NM_023324</a>          | <a href="#">67245</a>     | pellino 1                               | <a href="#">Peli1</a>         | 1.342 | 2.94  | 0.0209965   | 0.113397   |
| 1430 | 10455148 | <a href="#">NM_033595</a>          | <a href="#">93724</a>     | protocadherin gamma subfamily           | <a href="#">Pcdhga12</a>      | 1.342 | 5.007 | 0.00142103  | 0.0167856  |
| 1431 | 10577973 | <a href="#">NM_013462</a>          | <a href="#">11556</a>     | adrenergic receptor, beta 3             | <a href="#">Adrb3</a>         | 1.342 | 2.734 | 0.028359    | 0.138162   |
| 1432 | 10596113 |                                    |                           |                                         |                               | 1.342 | 3.108 | 0.0164817   | 0.0962943  |
| 1433 | 10416945 | <a href="#">AK053349</a>           | <a href="#">75957</a>     | RIKEN cDNA 5033413D16<br>gene           | <a href="#">5033413D16Rik</a> | 1.342 | 4.416 | 0.00287852  | 0.0280477  |
| 1434 | 10369236 | <a href="#">NM_010100</a>          | <a href="#">13608</a>     | ectodysplasin-A receptor                | <a href="#">Edar</a>          | 1.341 | 3.434 | 0.0104364   | 0.0699861  |
| 1435 | 10534041 | <a href="#">NM_007941</a>          | <a href="#">13852</a>     | syntaxin 2                              | <a href="#">Stx2</a>          | 1.341 | 3.102 | 0.016631    | 0.0970498  |
| 1436 | 10571601 | <a href="#">NM_016798</a>          | <a href="#">53318</a>     | PDZ and LIM domain 3                    | <a href="#">Pdlim3</a>        | 1.341 | 3.94  | 0.00528165  | 0.0429355  |
| 1437 | 10435565 | <a href="#">NM_008225</a>          | <a href="#">15163</a>     | hematopoietic cell specific Ly          | <a href="#">Hcls1</a>         | 1.341 | 3.183 | 0.0148159   | 0.0893521  |
|      |          |                                    |                           | predicted gene.                         |                               |       |       |             |            |

|      |          |                                    |                        |                                |                                   |       |       |             |            |
|------|----------|------------------------------------|------------------------|--------------------------------|-----------------------------------|-------|-------|-------------|------------|
| 1438 | 10502783 | <a href="#">ENSMUS10000066092</a>  | <a href="#">791262</a> | ENSMUSG0000005                 | <a href="#">ENSMUSG0000053583</a> | 1.341 | 1.803 | 0.11313     | 0.33337    |
| 1439 | 10461423 | <a href="#">NM_021890</a>          | <a href="#">60527</a>  | fatty acid desaturase 3        | <a href="#">Fads3</a>             | 1.34  | 4.547 | 0.00245328  | 0.0251197  |
| 1440 | 10482059 | <a href="#">NM_010283</a>          | <a href="#">14594</a>  | glycoprotein galactosyltransfe | <a href="#">Ggta1</a>             | 1.34  | 2.805 | 0.0255266   | 0.129273   |
| 1441 | 10587383 | <a href="#">NM_153098</a>          | <a href="#">235505</a> | CD109 antigen                  | <a href="#">Cd109</a>             | 1.339 | 3.472 | 0.00989544  | 0.0675805  |
| 1442 | 10444258 | <a href="#">NM_010724</a>          | <a href="#">16913</a>  | proteasome (prosome, macropain | <a href="#">Psm8</a>              | 1.339 | 3.323 | 0.0121744   | 0.0775627  |
| 1443 | 10547009 | <a href="#">NM_177683</a>          | <a href="#">232334</a> | vestigial like 4 (Drosophila)  | <a href="#">Vgl4</a>              | 1.339 | 3.13  | 0.0159849   | 0.0944005  |
| 1444 | 10400254 | <a href="#">NM_177171</a>          | <a href="#">320487</a> | HEAT repeat containing 5A      | <a href="#">Heatr5a</a>           | 1.339 | 4.746 | 0.00193046  | 0.0210292  |
| 1445 | 10468980 | <a href="#">BC021353</a>           | <a href="#">66540</a>  | RIKEN cDNA 3110001A13 gene     | <a href="#">3110001A13Rik</a>     | 1.339 | 4.459 | 0.0027303   | 0.0270903  |
| 1446 | 10543959 | <a href="#">NM_008973</a>          | <a href="#">19242</a>  | pleiotrophin                   | <a href="#">Ptn</a>               | 1.338 | 5.919 | 0.000525754 | 0.00837089 |
| 1447 | 10522009 | <a href="#">NM_025700</a>          | <a href="#">66681</a>  | phosphoglucomutase 1           | <a href="#">Pgm1</a>              | 1.338 | 3.477 | 0.00983344  | 0.0672657  |
| 1448 | 10436602 |                                    |                        |                                |                                   | 1.338 | 0.795 | 0.452243    | 0.708922   |
| 1449 | 10569972 | <a href="#">NM_026058</a>          | <a href="#">67260</a>  | LAG1 homolog, ceramide         | <a href="#">Lass4</a>             | 1.338 | 3.869 | 0.00579799  | 0.0459321  |
| 1450 | 10446756 | <a href="#">NM_027166</a>          | <a href="#">383295</a> | synthase-like 5 (Drosophila)   | <a href="#">Ypel5</a>             | 1.337 | 3.052 | 0.0178773   | 0.101492   |
| 1451 | 10372807 | <a href="#">NM_177092</a>          | <a href="#">320183</a> | methionine sulfoxide reductase | <a href="#">Msrb3</a>             | 1.337 | 1.936 | 0.0928523   | 0.295184   |
| 1452 | 10567725 | <a href="#">NM_001081329</a>       | <a href="#">210162</a> | zinc finger with KRAB and SCAN | <a href="#">Zkscan2</a>           | 1.337 | 2.714 | 0.0291615   | 0.140646   |
| 1453 | 10385776 | <a href="#">NM_009331</a>          | <a href="#">21414</a>  | transcription factor 7, T-cell | <a href="#">Tcf7</a>              | 1.337 | 5.126 | 0.00124081  | 0.0153875  |
| 1454 | 10497622 | <a href="#">NM_027941</a>          | <a href="#">71827</a>  | leucine rich repeat containing | <a href="#">Lrrc34</a>            | 1.337 | 1.584 | 0.156011    | 0.401839   |
| 1455 | 10391119 | <a href="#">NM_176830</a>          | <a href="#">66180</a>  | RIKEN cDNA 1110036O03 gene     | <a href="#">1110036O03Rik</a>     | 1.337 | 3.398 | 0.0109679   | 0.0722269  |
| 1456 | 10425945 | <a href="#">NM_010180</a>          | <a href="#">14114</a>  | fibulin 1                      | <a href="#">Fbln1</a>             | 1.336 | 3.862 | 0.00584924  | 0.0462086  |
| 1457 | 10504564 | <a href="#">NM_153167</a>          | <a href="#">242418</a> | WD repeat domain 32            | <a href="#">Wdr32</a>             | 1.336 | 1.9   | 0.0979397   | 0.30515    |
| 1458 | 10360040 | <a href="#">NM_010188</a>          | <a href="#">14131</a>  | Fc receptor, IgG, low affinity | <a href="#">Fcgr3</a>             | 1.336 | 2.045 | 0.0788977   | 0.267427   |
| 1459 | 10468311 | <a href="#">NM_008018</a>          | <a href="#">14218</a>  | SH3 and PX domains 2A          | <a href="#">Sh3pxd2a</a>          | 1.335 | 3.426 | 0.0105535   | 0.0705216  |
| 1460 | 10434778 | <a href="#">NM_023386</a>          | <a href="#">67775</a>  | receptor transporter protein 4 | <a href="#">Rtp4</a>              | 1.335 | 2.629 | 0.0330521   | 0.153299   |
| 1461 | 10367728 | <a href="#">NM_138667</a>          | <a href="#">68652</a>  | mitogen-activated protein kina | <a href="#">Map3k7ip2</a>         | 1.334 | 5.343 | 0.000973136 | 0.0128576  |
| 1462 | 10365242 | <a href="#">NM_001081218</a>       | <a href="#">67933</a>  | host cell factor C2            | <a href="#">Hcfc2</a>             | 1.334 | 4.231 | 0.00363072  | 0.0326632  |
| 1463 | 10402347 | <a href="#">NM_029803</a>          | <a href="#">76933</a>  | interferon, alpha-inducible pr | <a href="#">Ifi27</a>             | 1.333 | 2.294 | 0.0544132   | 0.212311   |
| 1464 | 10440246 | <a href="#">NM_026577</a>          | <a href="#">68146</a>  | ADP-ribosylation factor-like 1 | <a href="#">Arl13b</a>            | 1.333 | 3.79  | 0.00643926  | 0.0493482  |
| 1465 | 10401244 | <a href="#">NM_134156</a>          | <a href="#">109711</a> | actinin, alpha 1               | <a href="#">Actn1</a>             | 1.333 | 3.366 | 0.0114626   | 0.0744592  |
| 1466 | 10588154 | <a href="#">NM_009282</a>          | <a href="#">20842</a>  | stromal antigen 1              | <a href="#">Stag1</a>             | 1.332 | 5.02  | 0.00140027  | 0.016658   |
| 1467 | 10575534 | <a href="#">NM_009179</a>          | <a href="#">20444</a>  | ST3 beta-galactoside alpha-2,3 | <a href="#">St3gal2</a>           | 1.332 | 4.595 | 0.00231342  | 0.024108   |
| 1468 | 10554800 | <a href="#">NM_028238</a>          | <a href="#">72433</a>  | Rab38, member of RAS oncogene  | <a href="#">Rab38</a>             | 1.332 | 2.722 | 0.0288346   | 0.139559   |
| 1469 | 10466530 | <a href="#">BC013068</a>           | <a href="#">18552</a>  | proprotein convertase subtilis | <a href="#">Pcsk5</a>             | 1.332 | 4.981 | 0.00146424  | 0.017079   |
| 1470 | 10354389 | <a href="#">NM_172653</a>          | <a href="#">227059</a> | solute carrier family 39 (zinc | <a href="#">Slc39a10</a>          | 1.331 | 3.925 | 0.00538367  | 0.0435667  |
| 1471 | 10378697 | <a href="#">NM_008659</a>          | <a href="#">17913</a>  | myosin IC                      | <a href="#">Myo1c</a>             | 1.331 | 3.786 | 0.00647048  | 0.0494978  |
| 1472 | 10606473 | <a href="#">ENSMUST00000113422</a> | <a href="#">245596</a> | highly divergent homeobox      | <a href="#">Hdx</a>               | 1.33  | 1.615 | 0.1491      | 0.391477   |
| 1473 | 10587495 | <a href="#">NM_022986</a>          | <a href="#">65099</a>  | interleukin-1 receptor-associa | <a href="#">Il1bp1</a>            | 1.33  | 2.697 | 0.0299345   | 0.143448   |
| 1474 | 10397351 | <a href="#">NM_030887</a>          | <a href="#">81703</a>  | Jun dimerization protein 2     | <a href="#">Jdp2</a>              | 1.329 | 5.141 | 0.00122023  | 0.0151947  |
| 1475 | 10597413 | <a href="#">NM_019922</a>          | <a href="#">56693</a>  | cartilage associated protein   | <a href="#">Crtap</a>             | 1.329 | 3.631 | 0.00796566  | 0.0578187  |
| 1476 | 10518805 | <a href="#">NM_009498</a>          | <a href="#">22319</a>  | vesicle-associated membrane pr | <a href="#">Vamp3</a>             | 1.329 | 4.889 | 0.00162959  | 0.0185049  |
| 1477 | 10442224 | <a href="#">BC076634</a>           | <a href="#">381066</a> | cDNA sequence BC049807         | <a href="#">BC049807</a>          | 1.328 | 3.021 | 0.0186788   | 0.104788   |
| 1478 | 10408629 | <a href="#">NM_025831</a>          | <a href="#">66895</a>  | RIKEN cDNA 1300014I06 gene     | <a href="#">1300014I06Rik</a>     | 1.328 | 3.139 | 0.0157916   | 0.0934764  |
| 1479 | 10358541 | <a href="#">NM_001024720</a>       | <a href="#">545370</a> | hemcentin 1                    | <a href="#">Hmcn1</a>             | 1.328 | 1.757 | 0.121076    | 0.347578   |
| 1480 | 10485597 | <a href="#">NM_144804</a>          | <a href="#">211896</a> | DEP domain containing 7        | <a href="#">Depdc7</a>            | 1.328 | 3.432 | 0.010462    | 0.0701137  |
| 1481 | 10538138 | <a href="#">NM_008376</a>          | <a href="#">16205</a>  | GTPase, IMAP family member 1   | <a href="#">Gimap1</a>            | 1.328 | 5.241 | 0.00108943  | 0.0139352  |
| 1482 | 10422944 | <a href="#">AK153592</a>           | <a href="#">106074</a> | expressed sequence AW557046    | <a href="#">AW557046</a>          | 1.327 | 1.93  | 0.0936365   | 0.296785   |
| 1483 | 10583207 | <a href="#">AK129448</a>           | <a href="#">270118</a> | mastermind like 2 (Drosophila) | <a href="#">Maml2</a>             | 1.327 | 2.548 | 0.0372675   | 0.165996   |
| 1484 | 10477528 | <a href="#">BC047134</a>           | <a href="#">71425</a>  | RIKEN cDNA 4833413D08 gene     | <a href="#">4833413D08Rik</a>     | 1.327 | 1.507 | 0.174217    | 0.427189   |
| 1485 | 10498210 | <a href="#">NM_030595</a>          | <a href="#">26422</a>  | neurobeachin                   | <a href="#">Nbea</a>              | 1.327 | 3.876 | 0.00574339  | 0.0455547  |
| 1486 | 10538338 | <a href="#">NM_172728</a>          | <a href="#">231991</a> | cAMP responsive element bindin | <a href="#">Creb5</a>             | 1.327 | 3.71  | 0.0071611   | 0.0535222  |
| 1487 | 10502510 | <a href="#">NM_010723</a>          | <a href="#">16911</a>  | LIM domain only 4              | <a href="#">Lmo4</a>              | 1.326 | 2.411 | 0.0456634   | 0.189129   |
| 1488 | 10353632 | <a href="#">NM_175642</a>          | <a href="#">210933</a> | brain-specific angiogenesis in | <a href="#">Bai3</a>              | 1.326 | 2.739 | 0.0281284   | 0.137577   |
| 1489 | 10426284 | <a href="#">NM_013455</a>          | <a href="#">11434</a>  | preproacrosin                  | <a href="#">Acr</a>               | 1.326 | 5.239 | 0.00109188  | 0.0139472  |

|      |          |                                    |                        |                                                       |                               |       |       |             |            |
|------|----------|------------------------------------|------------------------|-------------------------------------------------------|-------------------------------|-------|-------|-------------|------------|
| 1490 | 10546685 | <a href="#">NM_025829</a>          | <a href="#">66892</a>  | eukaryotic translation initiat                        | <a href="#">Eif4e3</a>        | 1.326 | 3.071 | 0.0173937   | 0.0997203  |
| 1491 | 10591816 | <a href="#">NM_172920</a>          | <a href="#">244745</a> | dpy-19-like 1 (C. elegans)                            | <a href="#">Dpy19l1</a>       | 1.326 | 5.379 | 0.000934875 | 0.0125346  |
| 1492 | 10475532 | <a href="#">NM_021507</a>          | <a href="#">59010</a>  | sulfide quinone reductase-like                        | <a href="#">Sqrld</a>         | 1.326 | 2.714 | 0.0291899   | 0.140687   |
| 1493 | 10469255 | <a href="#">NM_008859</a>          | <a href="#">18761</a>  | protein kinase C, theta                               | <a href="#">Prkcg</a>         | 1.326 | 3.035 | 0.0183147   | 0.103265   |
| 1494 | 10546567 | <a href="#">BC048939</a>           | <a href="#">101351</a> | RIKEN cDNA A130022J15 gene                            | <a href="#">A130022J15Rik</a> | 1.326 | 2.635 | 0.0327646   | 0.152258   |
| 1495 | 10571657 | <a href="#">NM_007981</a>          | <a href="#">14081</a>  | acyl-CoA synthetase long-chain                        | <a href="#">Acs1l</a>         | 1.325 | 3.43  | 0.0104897   | 0.0702104  |
| 1496 | 10566205 | <a href="#">NM_001001559</a>       | <a href="#">384701</a> | deubiquitinating enzyme 2a                            | <a href="#">Dub2a</a>         | 1.325 | 2.358 | 0.0494728   | 0.199857   |
| 1497 | 10600825 | <a href="#">NM_001034907</a>       | <a href="#">547176</a> | zinc finger CCCH-type containi                        | <a href="#">Zc3h12b</a>       | 1.324 | 2.421 | 0.0450053   | 0.187728   |
| 1498 | 10562576 | <a href="#">NM_024413</a>          | <a href="#">72287</a>  | pleckstrin homology domain con                        | <a href="#">Plekhl1</a>       | 1.324 | 2.498 | 0.0401279   | 0.174258   |
| 1499 | 10381898 | <a href="#">NM_008626</a>          | <a href="#">17534</a>  | mannose receptor, C type 2                            | <a href="#">Mrc2</a>          | 1.324 | 6.345 | 0.000342207 | 0.00618959 |
| 1500 | 10363762 | <a href="#">NM_177794</a>          | <a href="#">327766</a> | transmembrane protein 26                              | <a href="#">Tmem26</a>        | 1.323 | 5.767 | 0.000615729 | 0.00938643 |
| 1501 | 10516103 | <a href="#">NM_009600</a>          | <a href="#">11426</a>  | microtubule-actin crosslinking                        | <a href="#">Macf1</a>         | 1.323 | 4.705 | 0.00202523  | 0.02187    |
| 1502 | 10498802 | <a href="#">NM_001099624</a>       | <a href="#">76089</a>  | Rap guanine nucleotide exchang                        | <a href="#">Rapgef2</a>       | 1.323 | 6.091 | 0.000441069 | 0.00740801 |
| 1503 | 10544756 | <a href="#">NM_010452</a>          | <a href="#">15400</a>  | homeo box A3                                          | <a href="#">Hoxa3</a>         | 1.323 | 3.212 | 0.0142345   | 0.0869614  |
| 1504 | 10459084 | <a href="#">NM_001109975</a>       | <a href="#">104027</a> | synaptopodin                                          | <a href="#">Synpo</a>         | 1.323 | 5.089 | 0.00129368  | 0.0158118  |
| 1505 | 10562578 | <a href="#">NM_025390</a>          | <a href="#">66161</a>  | processing of precursor 4, rib                        | <a href="#">Pop4</a>          | 1.323 | 1.744 | 0.123489    | 0.351591   |
| 1506 | 10388389 | <a href="#">NM_010430</a>          | <a href="#">15248</a>  | hypermethylated in cancer 1                           | <a href="#">Hic1</a>          | 1.322 | 2.184 | 0.0641529   | 0.235454   |
| 1507 | 10528799 | <a href="#">NM_029376</a>          | <a href="#">75657</a>  | spermatogenesis associated glu                        | <a href="#">Speer4a</a>       | 1.322 | 1.673 | 0.136988    | 0.373595   |
| 1508 | 10496130 | <a href="#">BC060502</a>           | <a href="#">271981</a> | RIKEN cDNA A630047E20 gene                            | <a href="#">A630047E20Rik</a> | 1.322 | 4.328 | 0.00321167  | 0.0300343  |
| 1509 | 10487645 | <a href="#">NM_019696</a>          | <a href="#">56264</a>  | carboxypeptidase X 1 (M14 fami                        | <a href="#">Cpxm1</a>         | 1.322 | 3.665 | 0.00761216  | 0.0560806  |
| 1510 | 10443080 | <a href="#">XM_985548</a>          | <a href="#">240057</a> | synaptic Ras GTPase activating                        | <a href="#">Syngap1</a>       | 1.321 | 5.371 | 0.000943055 | 0.0126089  |
| 1511 | 10493345 |                                    |                        |                                                       |                               | 1.321 | 3.937 | 0.00529991  | 0.0430343  |
| 1512 | 10518837 | <a href="#">NM_001081557</a>       | <a href="#">100072</a> | calmodulin binding transcripti                        | <a href="#">Camta1</a>        | 1.321 | 3.548 | 0.00892419  | 0.0626471  |
| 1513 | 10582939 |                                    |                        |                                                       |                               | 1.321 | 2.841 | 0.0242488   | 0.12487    |
| 1514 | 10548139 |                                    |                        |                                                       |                               | 1.32  | 3.979 | 0.0050165   | 0.0414332  |
| 1515 | 10531183 | <a href="#">NM_001081401</a>       | <a href="#">330119</a> | a disintegrin-like and metallo                        | <a href="#">Adamts3</a>       | 1.32  | 2.59  | 0.0350281   | 0.159003   |
| 1516 | 10399973 | <a href="#">NM_024124</a>          | <a href="#">79221</a>  | histone deacetylase 9                                 | <a href="#">Hdac9</a>         | 1.32  | 3.625 | 0.00803519  | 0.0581636  |
| 1517 | 10349102 | <a href="#">ENSMUST00000066789</a> | <a href="#">320761</a> | RIKEN cDNA D630008O14 gene                            | <a href="#">D630008O14Rik</a> | 1.32  | 2.498 | 0.0401772   | 0.174401   |
| 1518 | 10362674 | <a href="#">NR_002842</a>          | <a href="#">19850</a>  | U3A small nuclear RNA                                 | <a href="#">Rnu3a</a>         | 1.319 | 1.006 | 0.346985    | 0.621224   |
| 1519 | 10511975 | <a href="#">NM_011895</a>          | <a href="#">24060</a>  | solute carrier family 35 (CMP-                        | <a href="#">Slc35a1</a>       | 1.319 | 4.311 | 0.00328423  | 0.0304569  |
| 1520 | 10601878 | <a href="#">NM_146236</a>          | <a href="#">237052</a> | transcription elongation facto                        | <a href="#">Tceal1</a>        | 1.319 | 3.526 | 0.00918698  | 0.0638978  |
| 1521 | 10452047 | <a href="#">NM_011218</a>          | <a href="#">19280</a>  | protein tyrosine phosphatase, gamma-aminobutyric acid | <a href="#">Ptprs</a>         | 1.318 | 4.349 | 0.00313106  | 0.029555   |
| 1522 | 10445078 | <a href="#">NM_019439</a>          | <a href="#">54393</a>  | (GABA-                                                | <a href="#">Gabbr1</a>        | 1.318 | 4.02  | 0.00475798  | 0.0397482  |
| 1523 | 10533386 | <a href="#">NM_008507</a>          | <a href="#">16923</a>  | SH2B adaptor protein 3                                | <a href="#">Sh2b3</a>         | 1.318 | 6.027 | 0.000470822 | 0.00772908 |
| 1524 | 10394611 | <a href="#">ENSMUST00000101609</a> | <a href="#">71169</a>  | RIKEN cDNA 4933425L03 gene                            | <a href="#">4933425L03Rik</a> | 1.318 | 2.535 | 0.0380215   | 0.168377   |
| 1525 | 10551614 | <a href="#">NM_016772</a>          | <a href="#">51798</a>  | enoyl coenzyme A hydratase 1,                         | <a href="#">Ech1</a>          | 1.316 | 2.807 | 0.0254548   | 0.129038   |
| 1526 | 10596115 | <a href="#">AK082061</a>           | <a href="#">270190</a> | Eph receptor B1                                       | <a href="#">Ephb1</a>         | 1.316 | 2.08  | 0.0749313   | 0.25894    |
| 1527 | 10549534 |                                    |                        |                                                       |                               | 1.316 | 3.242 | 0.0136405   | 0.084307   |
| 1528 | 10374455 | <a href="#">NM_033523</a>          | <a href="#">114716</a> | sprouty-related, EVH1 domain c                        | <a href="#">Spred2</a>        | 1.316 | 3.382 | 0.0112206   | 0.0733781  |
| 1529 | 10491597 |                                    |                        |                                                       |                               | 1.315 | 4.086 | 0.00436602  | 0.0371789  |
| 1530 | 10600886 | <a href="#">NM_029536</a>          | <a href="#">76206</a>  | G protein-coupled receptor 165                        | <a href="#">Gpr165</a>        | 1.315 | 1.642 | 0.143324    | 0.384029   |
| 1531 | 10365344 | <a href="#">NM_146008</a>          | <a href="#">216198</a> | t-complex 11 (mouse) like 2                           | <a href="#">Tcp112</a>        | 1.315 | 2.787 | 0.0262162   | 0.131199   |
| 1532 | 10374727 | <a href="#">NM_016707</a>          | <a href="#">14025</a>  | B-cell CLL/lymphoma 11A (zinc                         | <a href="#">Bcl11a</a>        | 1.314 | 4.232 | 0.00362587  | 0.0326556  |
| 1533 | 10441497 | <a href="#">NM_054040</a>          | <a href="#">68842</a>  | tubby like protein 4                                  | <a href="#">Tulp4</a>         | 1.314 | 2.588 | 0.0351527   | 0.159397   |
| 1534 | 10587284 | <a href="#">NM_134255</a>          | <a href="#">68801</a>  | ELOVL family member 5, elongat                        | <a href="#">Elov5</a>         | 1.314 | 2.738 | 0.0281828   | 0.137705   |
| 1535 | 10418251 | <a href="#">NM_145221</a>          | <a href="#">72993</a>  | adaptor protein, phosphotyrosi                        | <a href="#">Appl1</a>         | 1.313 | 3.969 | 0.00508449  | 0.0417922  |
| 1536 | 10357043 | <a href="#">NM_009741</a>          | <a href="#">12043</a>  | B-cell leukemia/lymphoma 2                            | <a href="#">Bcl2</a>          | 1.313 | 3.275 | 0.0130283   | 0.0816451  |
| 1537 | 10502419 | <a href="#">NM_001040690</a>       | <a href="#">229877</a> | RAP1, GTP-GDP dissociation sti                        | <a href="#">Rap1gds1</a>      | 1.313 | 3.691 | 0.00734331  | 0.0545945  |
| 1538 | 10585803 | <a href="#">NM_009291</a>          | <a href="#">20897</a>  | stimulated by retinoic acid ge                        | <a href="#">Stra6</a>         | 1.312 | 3.075 | 0.0172775   | 0.0993516  |
| 1539 | 10475957 | <a href="#">NM_027192</a>          | <a href="#">69737</a>  | tubulin tyrosine ligase                               | <a href="#">Ttl</a>           | 1.312 | 3.35  | 0.0117181   | 0.0755777  |
| 1540 | 10493789 | <a href="#">NM_009113</a>          | <a href="#">20196</a>  | S100 calcium binding protein A                        | <a href="#">S100a13</a>       | 1.311 | 3.967 | 0.00509767  | 0.041842   |
| 1541 | 10594199 | <a href="#">NM_001040426</a>       | <a href="#">207596</a> | thrombospondin, type I, domain                        | <a href="#">Thsd4</a>         | 1.31  | 2.938 | 0.0210597   | 0.113586   |
| 1542 | 10538408 | <a href="#">BC042507</a>           | <a href="#">68235</a>  | RIKEN cDNA 2410066E13 gene                            | <a href="#">2410066E13Rik</a> | 1.31  | 4.265 | 0.00347668  | 0.0316448  |

|      |          |                                     |                           |                                 |                                    |       |       |             |           |
|------|----------|-------------------------------------|---------------------------|---------------------------------|------------------------------------|-------|-------|-------------|-----------|
| 1543 | 10428522 | <a href="#">NM_001081391</a>        | <a href="#">239420</a>    | CUB and Sushi multiple domains  | <a href="#">Csm3</a>               | 1.31  | 1.709 | 0.129848    | 0.361535  |
| 1544 | 10472953 | <a href="#">NM_008273</a>           | <a href="#">15431</a>     | homeo box D11                   | <a href="#">Hoxd11</a>             | 1.31  | 1.081 | 0.31449     | 0.591308  |
| 1545 | 10456988 | <a href="#">NM_053117</a>           | <a href="#">93737</a>     | par-6 partitioning defective 6  | <a href="#">Pard6g</a>             | 1.31  | 3.378 | 0.0112691   | 0.0735307 |
| 1546 | 10406551 | <a href="#">NM_024272</a>           | <a href="#">66970</a>     | single-stranded DNA binding pr  | <a href="#">Ssbp2</a>              | 1.31  | 3.48  | 0.00978831  | 0.067022  |
| 1547 | 10461439 | <a href="#">NM_146094</a>           | <a href="#">76267</a>     | fatty acid desaturase 1         | <a href="#">Fads1</a>              | 1.309 | 4.207 | 0.00374305  | 0.0333325 |
| 1548 | 10458764 | <a href="#">XM_001476513</a>        | <a href="#">100046618</a> | similar to ribosomal protein    | <a href="#">LOC100046618</a>       | 1.309 | 2.954 | 0.0205596   | 0.112129  |
| 1549 | 10382028 | <a href="#">NM_011947</a>           | <a href="#">26406</a>     | mitogen-activated protein kina  | <a href="#">Map3k3</a>             | 1.309 | 2.948 | 0.0207508   | 0.112733  |
| 1550 | 10556426 | <a href="#">NM_020606</a>           | <a href="#">57342</a>     | parvin, alpha                   | <a href="#">Parva</a>              | 1.309 | 3.868 | 0.0058004   | 0.0459339 |
| 1551 | 10506603 | <a href="#">NM_023672</a>           | <a href="#">72475</a>     | single-stranded DNA binding pr  | <a href="#">Ssbp3</a>              | 1.309 | 5.417 | 0.000896741 | 0.0121232 |
| 1552 | 10584309 | <a href="#">BC066002</a>            | <a href="#">235184</a>    | cDNA sequence BC024479          | <a href="#">BC024479</a>           | 1.309 | 2.819 | 0.0250222   | 0.127548  |
| 1553 | 10420171 | <a href="#">NM_080435</a>           | <a href="#">104110</a>    | adenylate cyclase 4             | <a href="#">Adcy4</a>              | 1.308 | 5.267 | 0.00105876  | 0.0136846 |
| 1554 | 10385883 | <a href="#">NM_019723</a>           | <a href="#">56517</a>     | solute carrier family 22 (orga  | <a href="#">Slc22a21</a>           | 1.308 | 2.51  | 0.0394198   | 0.172278  |
| 1555 | 10485580 | <a href="#">AK136931</a>            | <a href="#">100038443</a> | predicted gene, ENSMUSG0000007  | <a href="#">ENSMUSG00000074998</a> | 1.308 | 3.419 | 0.0106469   | 0.0709477 |
| 1556 | 10494889 | <a href="#">NM_177857</a>           | <a href="#">329727</a>    | DENN/MADD domain containing 2C  | <a href="#">Dennd2c</a>            | 1.308 | 3.758 | 0.00671894  | 0.0510108 |
| 1557 | 10596454 | <a href="#">NM_020559</a>           | <a href="#">11655</a>     | aminolevulinic acid synthase 1  | <a href="#">Alas1</a>              | 1.307 | 2.926 | 0.0214274   | 0.114576  |
| 1558 | 10503054 | <a href="#">NM_001081358</a>        | <a href="#">242274</a>    | leucine rich repeat containing  | <a href="#">Lrrc7</a>              | 1.307 | 1.866 | 0.10302     | 0.315188  |
| 1559 | 10405938 | <a href="#">NM_198322</a>           | <a href="#">212569</a>    | zinc finger protein 273         | <a href="#">Zfp273</a>             | 1.307 | 1.236 | 0.255045    | 0.529369  |
| 1560 | 10424607 | <a href="#">NM_008975</a>           | <a href="#">19245</a>     | protein tyrosine phosphatase 4  | <a href="#">Ptp4a3</a>             | 1.307 | 4.537 | 0.00248107  | 0.0253184 |
| 1561 | 10481678 | <a href="#">ENSMUST00000009695</a>  | <a href="#">70730</a>     | RIKEN cDNA 6330409D20 gene      | <a href="#">6330409D20Rik</a>      | 1.307 | 4.085 | 0.00437256  | 0.0372046 |
| 1562 | 10362115 | <a href="#">NM_183116</a>           | <a href="#">76306</a>     | RIKEN cDNA 1110021L09 gene      | <a href="#">1110021L09Rik</a>      | 1.307 | 2.05  | 0.0783792   | 0.266396  |
| 1563 | 10358545 | <a href="#">NM_001024720</a>        | <a href="#">545370</a>    | hemocentin 1                    | <a href="#">Hmcn1</a>              | 1.307 | 2.086 | 0.074254    | 0.257711  |
| 1564 | 10356995 |                                     |                           |                                 |                                    | 1.306 | 2.556 | 0.0368175   | 0.164303  |
| 1565 | 10456486 |                                     |                           |                                 |                                    | 1.306 | 3.352 | 0.0116976   | 0.0755041 |
| 1566 | 10455118 | <a href="#">NM_053143</a>           | <a href="#">93889</a>     | protocadherin beta 18           | <a href="#">Pcdhb18</a>            | 1.306 | 1.877 | 0.101421    | 0.312055  |
| 1567 | 10445767 | <a href="#">NM_001033405</a>        | <a href="#">328833</a>    | triggering receptor expressed   | <a href="#">Trem2</a>              | 1.305 | 2.62  | 0.0335285   | 0.154383  |
| 1568 | 10532819 | <a href="#">NM_026145</a>           | <a href="#">330171</a>    | potassium channel tetramerisat  | <a href="#">Kctd10</a>             | 1.305 | 4.823 | 0.00176211  | 0.0196302 |
| 1569 | 10423836 | <a href="#">NM_026778</a>           | <a href="#">68588</a>     | collagen triple helix repeat c  | <a href="#">Cthrc1</a>             | 1.305 | 1.938 | 0.0925539   | 0.294729  |
| 1570 | 10565612 | <a href="#">BC026557</a>            | <a href="#">66273</a>     | RIKEN cDNA 1810020D17 gene      | <a href="#">1810020D17Rik</a>      | 1.305 | 2.727 | 0.0286216   | 0.138865  |
| 1571 | 10392413 |                                     |                           |                                 |                                    | 1.305 | 0.911 | 0.391917    | 0.660136  |
| 1572 | 10410973 |                                     |                           |                                 |                                    | 1.305 | 4.074 | 0.00443771  | 0.0376076 |
| 1573 | 10357345 | <a href="#">NM_172484</a>           | <a href="#">210356</a>    | RIKEN cDNA E030049G20 gene      | <a href="#">E030049G20Rik</a>      | 1.304 | 3.95  | 0.00521038  | 0.0424541 |
| 1574 | 10519693 | <a href="#">NM_028882</a>           | <a href="#">108151</a>    | sema domain, immunoglobulin do  | <a href="#">Sema3d</a>             | 1.304 | 1.095 | 0.30868     | 0.585251  |
| 1575 | 10397853 | <a href="#">NM_177620</a>           | <a href="#">217835</a>    | Ras and Rab interactor 3        | <a href="#">Rin3</a>               | 1.304 | 4.086 | 0.00436985  | 0.0371965 |
| 1576 | 10415885 | <a href="#">NM_011446</a>           | <a href="#">20680</a>     | SRY-box containing gene 7       | <a href="#">Sox7</a>               | 1.304 | 2.561 | 0.0365818   | 0.163532  |
| 1577 | 10591161 | <a href="#">ENSMUST000000034647</a> | <a href="#">72230</a>     | zinc finger protein 558         | <a href="#">Zfp558</a>             | 1.304 | 2.333 | 0.0513415   | 0.204669  |
| 1578 | 10491623 | <a href="#">ENSMUST000000057272</a> | <a href="#">229227</a>    | RIKEN cDNA 4932438A13 gene      | <a href="#">4932438A13Rik</a>      | 1.304 | 2.848 | 0.0239935   | 0.123827  |
| 1579 | 10576051 | <a href="#">NM_013519</a>           | <a href="#">14234</a>     | forkhead box C2                 | <a href="#">Foxc2</a>              | 1.304 | 2.524 | 0.0386448   | 0.169947  |
| 1580 | 10352554 |                                     |                           |                                 |                                    | 1.304 | 4.375 | 0.00302937  | 0.0289701 |
| 1581 | 10468452 | <a href="#">NM_021377</a>           | <a href="#">58178</a>     | VPS10 domain receptor protein   | <a href="#">Sores1</a>             | 1.303 | 1.399 | 0.203328    | 0.466186  |
| 1582 | 10392642 | <a href="#">NM_147219</a>           | <a href="#">217265</a>    | ATP-binding cassette, sub-fami  | <a href="#">Abca5</a>              | 1.303 | 4.212 | 0.00372101  | 0.0332532 |
| 1583 | 10458663 | <a href="#">NM_009468</a>           | <a href="#">22240</a>     | dihydropyrimidinase-like 3      | <a href="#">Dpysl3</a>             | 1.303 | 1.975 | 0.0875635   | 0.284794  |
| 1584 | 10366277 | <a href="#">NM_178609</a>           | <a href="#">52679</a>     | E2F transcription factor 7      | <a href="#">E2f7</a>               | 1.303 | 2.608 | 0.0341381   | 0.156271  |
| 1585 | 10471555 | <a href="#">NM_011923</a>           | <a href="#">26360</a>     | angiopoietin-like 2             | <a href="#">Angptl2</a>            | 1.302 | 3.854 | 0.0059091   | 0.046516  |
| 1586 | 10471067 | <a href="#">NM_009116</a>           | <a href="#">20204</a>     | paired related homeobox 2       | <a href="#">Prrx2</a>              | 1.302 | 3.381 | 0.0112249   | 0.0733781 |
| 1587 | 10491609 | <a href="#">ENSMUST000000057272</a> | <a href="#">229227</a>    | RIKEN cDNA 4932438A13 gene      | <a href="#">4932438A13Rik</a>      | 1.302 | 2.536 | 0.0379217   | 0.168193  |
| 1588 | 10457546 | <a href="#">NM_207530</a>           | <a href="#">64291</a>     | oxysterol binding protein-like  | <a href="#">Osbn1a</a>             | 1.301 | 4.231 | 0.00363182  | 0.0326632 |
| 1589 | 10360070 | <a href="#">NM_010185</a>           | <a href="#">14127</a>     | Fc receptor, IgE, high affinity | <a href="#">Fcer1g</a>             | 1.301 | 4.472 | 0.0028696   | 0.0267933 |
| 1590 | 10585834 | <a href="#">BC096614</a>            | <a href="#">319477</a>    | RIKEN cDNA 6030419C18 gene      | <a href="#">6030419C18Rik</a>      | 1.301 | 3.798 | 0.00636329  | 0.0489968 |
| 1591 | 10501778 | <a href="#">NM_019550</a>           | <a href="#">56195</a>     | polypyrimidine tract binding p  | <a href="#">Ptbp2</a>              | 1.301 | 5.202 | 0.00113922  | 0.0143979 |

|      |          |                                    |                        |                                   |                                    |       |       |             |            |
|------|----------|------------------------------------|------------------------|-----------------------------------|------------------------------------|-------|-------|-------------|------------|
| 1592 | 10396419 |                                    |                        |                                   |                                    | 1.301 | 1.461 | 0.186287    | 0.444466   |
| 1593 | 10598771 | <a href="#">NM_173740</a>          | <a href="#">17161</a>  | monoamine oxidase A               | <a href="#">Maoa</a>               | 1.3   | 4.2   | 0.00377417  | 0.0335227  |
| 1594 | 10421361 | <a href="#">NM_009755</a>          | <a href="#">12153</a>  | bone morphogenetic protein 1      | <a href="#">Bmp1</a>               | 1.3   | 2.757 | 0.0273872   | 0.135108   |
| 1595 | 10583905 | <a href="#">NM_009859</a>          | <a href="#">235072</a> | septin 7                          | <a href="#">Sept7</a>              | 1.3   | 4.752 | 0.00191714  | 0.0209391  |
| 1596 | 10581222 | <a href="#">NM_177699</a>          | <a href="#">234686</a> | formin homology 2 domain<br>conta | <a href="#">Fhod1</a>              | 1.3   | 4.165 | 0.00394657  | 0.0346394  |
| 1597 | 10486564 | <a href="#">NM_026891</a>          | <a href="#">68968</a>  | congenital dyserythropoietic a    | <a href="#">Cdan1</a>              | 1.3   | 4.399 | 0.002941    | 0.028407   |
| 1598 | 10527959 |                                    |                        |                                   |                                    | 1.299 | 1.803 | 0.113178    | 0.333338   |
| 1599 | 10354598 | <a href="#">NM_001001883</a>       | <a href="#">329152</a> | HECT, C2 and WW domain<br>contain | <a href="#">Hecw2</a>              | 1.299 | 1.805 | 0.112854    | 0.332847   |
| 1600 | 10369750 | <a href="#">ENSMUST00000079279</a> | <a href="#">791346</a> | predicted gene,<br>ENSMUSG0000006 | <a href="#">ENSMUSG00000062561</a> | 1.299 | 1.771 | 0.118597    | 0.343885   |
| 1601 | 10379176 | <a href="#">NM_011676</a>          | <a href="#">22248</a>  | unc-119 homolog (C. elegans)      | <a href="#">Unc119</a>             | 1.299 | 2.952 | 0.0206307   | 0.112253   |
| 1602 | 10358259 | <a href="#">NM_021605</a>          | <a href="#">59125</a>  | NIMA (never in mitosis gene a)    | <a href="#">Nek7</a>               | 1.299 | 3.075 | 0.0172941   | 0.0993717  |
| 1603 | 10354868 | <a href="#">NM_172513</a>          | <a href="#">213056</a> | DNA segment, Chr 1, ERATO<br>Doi  | <a href="#">D1Ertd53e</a>          | 1.299 | 4.567 | 0.00239431  | 0.0246761  |
| 1604 | 10493519 | <a href="#">NM_001113331</a>       | <a href="#">20416</a>  | src homology 2 domain-containi    | <a href="#">Shc1</a>               | 1.299 | 1.947 | 0.0913807   | 0.292662   |
| 1605 | 10560832 | <a href="#">NM_009561</a>          | <a href="#">22719</a>  | zinc finger protein 61            | <a href="#">Zfp61</a>              | 1.298 | 4.543 | 0.00246429  | 0.025208   |
| 1606 | 10421932 | <a href="#">NM_001081377</a>       | <a href="#">211712</a> | protocadherin 9                   | <a href="#">Pcdh9</a>              | 1.298 | 1.452 | 0.188509    | 0.446593   |
| 1607 | 10365420 | <a href="#">BC086492</a>           | <a href="#">103266</a> | expressed sequence AI597468       | <a href="#">AI597468</a>           | 1.298 | 4.455 | 0.00274472  | 0.0272078  |
| 1608 | 10488482 | <a href="#">NM_080575</a>          | <a href="#">68738</a>  | acyl-CoA synthetase short-chai    | <a href="#">Acsc1</a>              | 1.298 | 6.034 | 0.00046703  | 0.00769071 |
| 1609 | 10462853 | <a href="#">NM_007811</a>          | <a href="#">13082</a>  | cytochrome P450, family 26, su    | <a href="#">Cyp26a1</a>            | 1.297 | 3.043 | 0.0180925   | 0.102354   |
| 1610 | 10522388 | <a href="#">NM_173403</a>          | <a href="#">231290</a> | solute carrier family 10 (sodi    | <a href="#">Slc10a4</a>            | 1.297 | 0.78  | 0.460057    | 0.714885   |
| 1611 | 10489355 | <a href="#">ENSMUST00000017961</a> | <a href="#">59091</a>  | junctional protein 2              | <a href="#">Jph2</a>               | 1.297 | 2.325 | 0.0519793   | 0.206172   |
| 1612 | 10594661 | <a href="#">NM_024427</a>          | <a href="#">22003</a>  | tropomyosin 1, alpha              | <a href="#">Tpm1</a>               | 1.297 | 2.421 | 0.0450172   | 0.18774    |
| 1613 | 10394625 |                                    |                        |                                   |                                    | 1.296 | 2.261 | 0.0571415   | 0.218639   |
| 1614 | 10604292 | <a href="#">NM_011855</a>          | <a href="#">23963</a>  | odd Oz/ten-m homolog 1<br>(Drosop | <a href="#">Odz1</a>               | 1.296 | 1.756 | 0.121225    | 0.347818   |
| 1615 | 10606235 | <a href="#">NM_175358</a>          | <a href="#">108672</a> | zinc finger, DHHC domain conta    | <a href="#">Zdhhc15</a>            | 1.296 | 3.83  | 0.00610469  | 0.0474981  |
| 1616 | 10571325 | <a href="#">NM_001081279</a>       | <a href="#">52065</a>  | malignant fibrous histiocytoma    | <a href="#">Mfhas1</a>             | 1.296 | 4.013 | 0.00479766  | 0.0399849  |
| 1617 | 10402211 | <a href="#">NM_011812</a>          | <a href="#">23876</a>  | fibulin 5                         | <a href="#">Fbln5</a>              | 1.296 | 3.537 | 0.00905587  | 0.0632356  |
| 1618 | 10350392 | <a href="#">NM_009791</a>          | <a href="#">12316</a>  | asp (abnormal spindle)-like, m    | <a href="#">Aspm</a>               | 1.296 | 5.25  | 0.00107956  | 0.0138593  |
| 1619 | 10507699 | <a href="#">NM_013883</a>          | <a href="#">29871</a>  | sex comb on midleg homolog 1      | <a href="#">Scmh1</a>              | 1.296 | 4.133 | 0.00411223  | 0.0356495  |
| 1620 | 10376534 | <a href="#">NM_201245</a>          | <a href="#">26936</a>  | expressed sequence AA536749       | <a href="#">AA536749</a>           | 1.296 | 3.757 | 0.0067269   | 0.0510347  |
| 1621 | 10381122 | <a href="#">NM_010221</a>          | <a href="#">14230</a>  | FK506 binding protein 10          | <a href="#">Fkbp10</a>             | 1.296 | 3.457 | 0.0101118   | 0.0685504  |
| 1622 | 10527638 | <a href="#">NM_009663</a>          | <a href="#">11690</a>  | arachidonate 5-lipoxygenase ac    | <a href="#">Alox5ap</a>            | 1.296 | 1.864 | 0.103376    | 0.315955   |
| 1623 | 10457106 | <a href="#">NM_172633</a>          | <a href="#">12405</a>  | cerebellin 2 precursor protein    | <a href="#">Cbln2</a>              | 1.295 | 3.234 | 0.0137862   | 0.0850347  |
| 1624 | 10424082 | <a href="#">NM_175503</a>          | <a href="#">239435</a> | alanine and arginine rich doma    | <a href="#">Aard</a>               | 1.295 | 1.155 | 0.284969    | 0.560293   |
| 1625 | 10552758 | <a href="#">ENSMUST00000107882</a> | <a href="#">67605</a>  | AKT1 substrate 1 (proline-rich    | <a href="#">Akt1s1</a>             | 1.295 | 2.264 | 0.0568681   | 0.218146   |
| 1626 | 10577838 | <a href="#">ENSMUST00000098860</a> | <a href="#">72108</a>  | DDHD domain containing 2          | <a href="#">Ddhd2</a>              | 1.295 | 5.529 | 0.000793846 | 0.0111752  |
| 1627 | 10498192 | <a href="#">NM_007628</a>          | <a href="#">12427</a>  | cyclin A1                         | <a href="#">Cen1</a>               | 1.295 | 5.366 | 0.000948627 | 0.0126388  |
| 1628 | 10552433 | <a href="#">NM_001008549</a>       | <a href="#">210104</a> | cDNA sequence BC043301            | <a href="#">BC043301</a>           | 1.294 | 2.87  | 0.0232429   | 0.121136   |
| 1629 | 10476395 | <a href="#">NM_007553</a>          | <a href="#">12156</a>  | bone morphogenetic protein 2      | <a href="#">Bmp2</a>               | 1.294 | 1.758 | 0.120815    | 0.347267   |
| 1630 | 10435787 |                                    |                        |                                   |                                    | 1.294 | 0.717 | 0.496028    | 0.740712   |
| 1631 | 10545252 |                                    |                        |                                   |                                    | 1.294 | 3.625 | 0.0080351   | 0.0581636  |
| 1632 | 10523161 | <a href="#">NM_026788</a>          | <a href="#">665563</a> | RIKEN cDNA 1110019K23<br>gene     | <a href="#">1110019K23Rik</a>      | 1.294 | 1.694 | 0.13286     | 0.366501   |
| 1633 | 10411171 | <a href="#">NM_172263</a>          | <a href="#">218461</a> | phosphodiesterase 8B              | <a href="#">Pde8b</a>              | 1.294 | 2.9   | 0.0222347   | 0.117415   |
| 1634 | 10472757 | <a href="#">NM_028593</a>          | <a href="#">73649</a>  | cytochrome b reductase 1          | <a href="#">Cybrd1</a>             | 1.294 | 2.063 | 0.0768681   | 0.262866   |
| 1635 | 10385361 | <a href="#">NM_024475</a>          | <a href="#">79560</a>  | ubiquitin-like domain containi    | <a href="#">Ublep1</a>             | 1.293 | 1.871 | 0.102305    | 0.313633   |
| 1636 | 10386921 | <a href="#">NM_133208</a>          | <a href="#">170740</a> | zinc finger protein 287           | <a href="#">Zfp287</a>             | 1.293 | 2.801 | 0.0256933   | 0.129873   |
| 1637 | 10387201 | <a href="#">NM_177566</a>          | <a href="#">442801</a> | Rho guanine nucleotide exchang    | <a href="#">Arhgef15</a>           | 1.293 | 4.573 | 0.0023751   | 0.0245931  |
| 1638 | 10602261 | <a href="#">NM_008312</a>          | <a href="#">15560</a>  | 5-hydroxytryptamine (serotonin    | <a href="#">Htr2c</a>              | 1.293 | 2.938 | 0.0210637   | 0.113586   |
| 1639 | 10595382 | <a href="#">NM_027448</a>          | <a href="#">75782</a>  | Leber congenital amaurosis 5 (    | <a href="#">Lca5</a>               | 1.293 | 3.606 | 0.0082421   | 0.0591551  |
| 1640 | 10424485 | <a href="#">NM_001081409</a>       | <a href="#">239510</a> | PHD finger protein 20-like 1      | <a href="#">Phf201l</a>            | 1.293 | 3.572 | 0.00862861  | 0.0610776  |
| 1641 | 10499950 |                                    |                        |                                   |                                    | 1.293 | 2.735 | 0.0282794   | 0.137931   |
| 1642 | 10351107 | <a href="#">NM_026078</a>          | <a href="#">67292</a>  | phosphatidylinositol glycan an    | <a href="#">Pigc</a>               | 1.293 | 3.438 | 0.0103756   | 0.0698     |
| 1643 | 10552480 | <a href="#">NM_019974</a>          | <a href="#">56538</a>  | kallikrein related-peptidase 1    | <a href="#">Klk11</a>              | 1.292 | 3.802 | 0.00633528  | 0.0488424  |

|      |          |                                    |                           |                                   |                                    |       |       |             |            |
|------|----------|------------------------------------|---------------------------|-----------------------------------|------------------------------------|-------|-------|-------------|------------|
| 1644 | 10421924 | <a href="#">NM_001081377</a>       | <a href="#">211712</a>    | protocadherin 9                   | <a href="#">Pcdh9</a>              | 1.292 | 1.653 | 0.14096     | 0.37982    |
| 1645 | 10455108 | <a href="#">NM_053141</a>          | <a href="#">93887</a>     | protocadherin beta 16             | <a href="#">Pcdhb16</a>            | 1.292 | 2.437 | 0.0439694   | 0.184792   |
| 1646 | 10450723 | <a href="#">ENSMUST00000074201</a> | <a href="#">15024</a>     | histocompatibility 2, T region    | <a href="#">H2-T10</a>             | 1.292 | 2.147 | 0.0677591   | 0.243242   |
| 1647 | 10359929 | <a href="#">NM_022563</a>          | <a href="#">18214</a>     | discoidin domain receptor fami    | <a href="#">Ddr2</a>               | 1.292 | 1.577 | 0.157432    | 0.404021   |
| 1648 | 10516982 | <a href="#">NM_133887</a>          | <a href="#">100226</a>    | syntaxin 12                       | <a href="#">Stx12</a>              | 1.292 | 3.943 | 0.00525641  | 0.0427467  |
| 1649 | 10513805 | <a href="#">NM_019967</a>          | <a href="#">56710</a>     | deleted in bladder cancer 1 (h    | <a href="#">Dbc1</a>               | 1.292 | 1.35  | 0.217924    | 0.485848   |
| 1650 | 10428837 |                                    |                           |                                   |                                    | 1.292 | 1.96  | 0.0896054   | 0.28899    |
| 1651 | 10555873 | <a href="#">NM_147048</a>          | <a href="#">259050</a>    | olfactory receptor 652            | <a href="#">Olf652</a>             | 1.292 | 2.642 | 0.0324282   | 0.151275   |
| 1652 | 10569344 | <a href="#">NM_001122737</a>       | <a href="#">16002</a>     | insulin-like growth factor 2      | <a href="#">Igf2</a>               | 1.292 | 4.6   | 0.00229788  | 0.0240288  |
| 1653 | 10407707 | <a href="#">AK046516</a>           | <a href="#">328186</a>    | predicted gene,<br>ENSMUSG0000007 | <a href="#">ENSMUSG00000071543</a> | 1.292 | 2.321 | 0.0522742   | 0.20675    |
| 1654 | 10368052 | <a href="#">ENSMUST00000095817</a> | <a href="#">100039660</a> | hypothetical protein LOC100039    | <a href="#">LOC100039660</a>       | 1.291 | 1.365 | 0.213186    | 0.479125   |
| 1655 | 10572747 | <a href="#">NM_001001491</a>       | <a href="#">326618</a>    | tropomyosin 4                     | <a href="#">Tpm4</a>               | 1.291 | 5.745 | 0.000630432 | 0.00954177 |
| 1656 | 10582466 | <a href="#">NM_020564</a>          | <a href="#">57429</a>     | sulfotransferase family 5A, me    | <a href="#">Sult5a1</a>            | 1.291 | 3.016 | 0.0188025   | 0.105258   |
| 1657 | 10598750 | <a href="#">NM_011823</a>          | <a href="#">23890</a>     | G protein-coupled receptor 34     | <a href="#">Gpr34</a>              | 1.291 | 2.418 | 0.045208    | 0.188022   |
| 1658 | 10512915 | <a href="#">BC013800</a>           | <a href="#">67063</a>     | RIKEN cDNA 2810432L12 gene        | <a href="#">2810432L12Rik</a>      | 1.291 | 2.79  | 0.026125    | 0.130964   |
| 1659 | 10462237 | <a href="#">NM_011416</a>          | <a href="#">67155</a>     | SWI/SNF related, matrix associ    | <a href="#">Smarca2</a>            | 1.29  | 4.624 | 0.00223241  | 0.0235421  |
| 1660 | 10588192 | <a href="#">ENSMUST00000085177</a> | <a href="#">77853</a>     | male-specific lethal 2-like 1     | <a href="#">Msl2l1</a>             | 1.29  | 2.222 | 0.0605706   | 0.226995   |
| 1661 | 10520604 | <a href="#">NM_133918</a>          | <a href="#">100952</a>    | elastin microfibril interfacer    | <a href="#">Emilin1</a>            | 1.29  | 3.834 | 0.00607253  | 0.0473442  |
| 1662 | 10573427 | <a href="#">ENSMUST00000098571</a> | <a href="#">619292</a>    | RIKEN cDNA G430095P16<br>gene     | <a href="#">G430095P16Rik</a>      | 1.29  | 4.422 | 0.00285913  | 0.0279701  |
| 1663 | 10545086 | <a href="#">NM_001042451</a>       | <a href="#">20617</a>     | synuclein, alpha                  | <a href="#">Snca</a>               | 1.29  | 1.195 | 0.269778    | 0.544449   |
| 1664 | 10493995 | <a href="#">NM_009112</a>          | <a href="#">20194</a>     | S100 calcium binding protein A    | <a href="#">S100a10</a>            | 1.29  | 2.461 | 0.0424473   | 0.180512   |
| 1665 | 10360349 | <a href="#">NM_053199</a>          | <a href="#">94332</a>     | cell adhesion molecule 3          | <a href="#">Cadm3</a>              | 1.29  | 5.555 | 0.000772048 | 0.0109705  |
| 1666 | 10544199 | <a href="#">NM_172477</a>          | <a href="#">209773</a>    | DENN/MADD domain<br>containing 2A | <a href="#">Dennd2a</a>            | 1.29  | 2.318 | 0.0524604   | 0.207138   |
| 1667 | 10472366 | <a href="#">NM_001099298</a>       | <a href="#">110876</a>    | sodium channel, voltage-gated,    | <a href="#">Scn2a1</a>             | 1.289 | 1.641 | 0.143539    | 0.384139   |
| 1668 | 10542880 | <a href="#">BC048711</a>           | <a href="#">320204</a>    | RIKEN cDNA 4833442J19 gene        | <a href="#">4833442J19Rik</a>      | 1.289 | 1.217 | 0.261891    | 0.536313   |
| 1669 | 10367768 |                                    |                           |                                   |                                    | 1.289 | 1.479 | 0.181408    | 0.437465   |
| 1670 | 10444028 | <a href="#">NM_030697</a>          | <a href="#">80880</a>     | KN motif and ankyrin repeat do    | <a href="#">Kank3</a>              | 1.289 | 3.446 | 0.0102664   | 0.069264   |
| 1671 | 10399801 | <a href="#">NM_172951</a>          | <a href="#">268534</a>    | syntrophin, gamma 2               | <a href="#">Sntg2</a>              | 1.289 | 1.896 | 0.0985992   | 0.30667    |
| 1672 | 10511258 | <a href="#">NM_026125</a>          | <a href="#">67389</a>     | C1q domain containing 2           | <a href="#">C1qdc2</a>             | 1.289 | 3.427 | 0.0105406   | 0.0705216  |
| 1673 | 10512030 | <a href="#">BC076612</a>           | <a href="#">73205</a>     | RIKEN cDNA 3110043O21<br>gene     | <a href="#">3110043O21Rik</a>      | 1.289 | 3.369 | 0.0114173   | 0.0742122  |
| 1674 | 10345580 | <a href="#">NM_030266</a>          | <a href="#">269180</a>    | inositol polyphosphate-4-phosp    | <a href="#">Inpp4a</a>             | 1.289 | 3.064 | 0.0175715   | 0.100279   |
| 1675 | 10496971 | <a href="#">NM_025758</a>          | <a href="#">66772</a>     | ankyrin repeat and SOCS box-co    | <a href="#">Asb17</a>              | 1.288 | 1.33  | 0.224135    | 0.494224   |
| 1676 | 10454067 | <a href="#">BC116990</a>           | <a href="#">73677</a>     | proteasome (prosome, macropain    | <a href="#">Psm8</a>               | 1.288 | 2.138 | 0.0686577   | 0.245219   |
| 1677 | 10583669 | <a href="#">AB124611</a>           | <a href="#">382062</a>    | cDNA sequence AB124611            | <a href="#">AB124611</a>           | 1.288 | 3.969 | 0.00508233  | 0.0417922  |
| 1678 | 10347948 | <a href="#">NM_013673</a>          | <a href="#">20684</a>     | nuclear antigen Sp100             | <a href="#">Sp100</a>              | 1.287 | 1.388 | 0.206527    | 0.470917   |
| 1679 | 10535329 | <a href="#">NM_019943</a>          | <a href="#">56522</a>     | poly (A) polymerase beta (test    | <a href="#">Pap0lb</a>             | 1.287 | 1.998 | 0.0846768   | 0.279368   |
| 1680 | 10496438 | <a href="#">NM_007409</a>          | <a href="#">11522</a>     | alcohol dehydrogenase 1 (class    | <a href="#">Adh1</a>               | 1.287 | 2.205 | 0.0621486   | 0.230498   |
| 1681 | 10494114 | <a href="#">NM_009150</a>          | <a href="#">20341</a>     | selenium binding protein 1        | <a href="#">Selenbp1</a>           | 1.287 | 3.013 | 0.0188905   | 0.105499   |
| 1682 | 10450369 | <a href="#">NM_010479</a>          | <a href="#">193740</a>    | heat shock protein 1A             | <a href="#">Hspa1a</a>             | 1.287 | 2.42  | 0.0450665   | 0.187761   |
| 1683 | 10455071 | <a href="#">NM_053132</a>          | <a href="#">93878</a>     | protocadherin beta 7              | <a href="#">Pcdhb7</a>             | 1.287 | 3.037 | 0.018259    | 0.102979   |
| 1684 | 10492006 | <a href="#">NM_016984</a>          | <a href="#">22066</a>     | transient receptor potential c    | <a href="#">Trpc4</a>              | 1.287 | 1.6   | 0.152395    | 0.396241   |
| 1685 | 10531185 | <a href="#">NM_001081401</a>       | <a href="#">330119</a>    | a disintegrin-like and metallo    | <a href="#">Adamts3</a>            | 1.287 | 2.814 | 0.0252187   | 0.128086   |
| 1686 | 10440097 |                                    |                           |                                   |                                    | 1.286 | 6.132 | 0.000423017 | 0.00721493 |
| 1687 | 10448676 | <a href="#">NM_023055</a>          | <a href="#">65962</a>     | solute carrier family 9 (sodi     | <a href="#">Slc9a3r2</a>           | 1.286 | 3.378 | 0.011278    | 0.0735307  |
| 1688 | 10417759 | <a href="#">NM_144839</a>          | <a href="#">218793</a>    | ubiquitin-conjugating enzyme E    | <a href="#">Ube2e2</a>             | 1.286 | 2.93  | 0.0212837   | 0.114219   |
| 1689 | 10369541 | <a href="#">NM_010438</a>          | <a href="#">15275</a>     | hexokinase 1                      | <a href="#">Hk1</a>                | 1.286 | 3.219 | 0.014087    | 0.0862348  |
| 1690 | 10468746 | <a href="#">NM_175199</a>          | <a href="#">73442</a>     | heat shock protein 12A            | <a href="#">Hspa12a</a>            | 1.286 | 3.842 | 0.00600588  | 0.0469458  |
| 1691 | 10596704 | <a href="#">NM_008138</a>          | <a href="#">14678</a>     | guanine nucleotide binding pro    | <a href="#">Gnai2</a>              | 1.285 | 5     | 0.00143361  | 0.0168502  |
| 1692 | 10418879 | <a href="#">NM_016700</a>          | <a href="#">26419</a>     | mitogen-activated protein kina    | <a href="#">Mapk8</a>              | 1.285 | 3.314 | 0.0123337   | 0.0782223  |
| 1693 | 10486255 | <a href="#">NM_001042653</a>       | <a href="#">70645</a>     | Opa interacting protein 5         | <a href="#">Oip5</a>               | 1.285 | 2.953 | 0.0206149   | 0.112225   |
| 1694 | 10573054 | <a href="#">NM_010369</a>          | <a href="#">14934</a>     | glycophorin A                     | <a href="#">Gypa</a>               | 1.285 | 0.636 | 0.544422    | 0.776582   |
| 1695 | 10560174 | <a href="#">NM_009156</a>          | <a href="#">20364</a>     | selenoprotein W, muscle 1         | <a href="#">Sepw1</a>              | 1.284 | 3.437 | 0.010394    | 0.0698131  |
| 1696 | 10500204 | <a href="#">NM_007899</a>          | <a href="#">13601</a>     | extracellular matrix protein 1    | <a href="#">Ecm1</a>               | 1.284 | 2.419 | 0.0451472   | 0.187967   |
| 1697 | 10534927 | <a href="#">NM_153510</a>          | <a href="#">231805</a>    | paired immunoglobulin-like type   | <a href="#">Pilra</a>              | 1.284 | 2.533 | 0.0381165   | 0.168676   |

|      |          |                                    |                        |                                |                               |       |       |             |           |
|------|----------|------------------------------------|------------------------|--------------------------------|-------------------------------|-------|-------|-------------|-----------|
| 1698 | 10411519 | <a href="#">NM_008634</a>          | <a href="#">17755</a>  | microtubule-associated protein | <a href="#">Mtap1b</a>        | 1.284 | 2.765 | 0.0270986   | 0.134054  |
| 1699 | 10604961 | <a href="#">NM_008067</a>          | <a href="#">14396</a>  | gamma-aminobutyric acid (GABA- | <a href="#">Gabra3</a>        | 1.284 | 2.034 | 0.0802833   | 0.270212  |
| 1700 | 10419416 | <a href="#">BC023359</a>           | <a href="#">67419</a>  | RIKEN cDNA 3632451O06 gene     | <a href="#">3632451O06Rik</a> | 1.284 | 1.459 | 0.186635    | 0.444956  |
| 1701 | 10453057 | <a href="#">NM_009994</a>          | <a href="#">13078</a>  | cytochrome P450, family 1, sub | <a href="#">Cyp1b1</a>        | 1.284 | 1.033 | 0.334996    | 0.610563  |
| 1702 | 10561431 | <a href="#">NM_138752</a>          | <a href="#">101497</a> | pleckstrin homology domain con | <a href="#">Plekhd2</a>       | 1.283 | 4.657 | 0.00214689  | 0.0229147 |
| 1703 | 10601569 | <a href="#">NM_001081385</a>       | <a href="#">245578</a> | protocadherin 11 X-linked      | <a href="#">Pcdh11x</a>       | 1.283 | 1.974 | 0.087749    | 0.285265  |
| 1704 | 10407598 | <a href="#">NM_023868</a>          | <a href="#">20191</a>  | ryanodine receptor 2, cardiac  | <a href="#">Ryr2</a>          | 1.283 | 2.511 | 0.0393733   | 0.172148  |
| 1705 | 10586722 | <a href="#">AK045567</a>           | <a href="#">320055</a> | RIKEN cDNA F830001A07 gene     | <a href="#">F830001A07Rik</a> | 1.283 | 3.014 | 0.0188785   | 0.10546   |
| 1706 | 10399725 | <a href="#">NM_009234</a>          | <a href="#">20666</a>  | SRY-box containing gene 11     | <a href="#">Sox11</a>         | 1.283 | 4.153 | 0.00400728  | 0.0350414 |
| 1707 | 10599174 | <a href="#">NM_133990</a>          | <a href="#">16164</a>  | interleukin 13 receptor, alpha | <a href="#">Il13ra1</a>       | 1.283 | 1.554 | 0.162982    | 0.411818  |
| 1708 | 10605986 | <a href="#">NM_007515</a>          | <a href="#">11989</a>  | solute carrier family 7 (catio | <a href="#">Slc7a3</a>        | 1.283 | 1.625 | 0.146888    | 0.38876   |
| 1709 | 10497329 |                                    |                        |                                |                               | 1.283 | 1.528 | 0.169228    | 0.42056   |
| 1710 | 10479902 | <a href="#">NM_001081131</a>       | <a href="#">209692</a> | dehydrogenase E1 and transketo | <a href="#">Dhtkd1</a>        | 1.283 | 3.319 | 0.0122391   | 0.0778362 |
| 1711 | 10445531 | <a href="#">NM_207671</a>          | <a href="#">57908</a>  | zinc finger protein 318        | <a href="#">Zfp318</a>        | 1.283 | 4.731 | 0.00196513  | 0.0212971 |
| 1712 | 10438907 | <a href="#">NM_008148</a>          | <a href="#">14729</a>  | glycoprotein 5 (platelet)      | <a href="#">Gp5</a>           | 1.282 | 3.095 | 0.0167999   | 0.0975911 |
| 1713 | 10546736 | <a href="#">NM_008779</a>          | <a href="#">18488</a>  | contactin 3                    | <a href="#">Cntn3</a>         | 1.282 | 2.306 | 0.0534779   | 0.209823  |
| 1714 | 10573234 | <a href="#">NM_181039</a>          | <a href="#">330814</a> | latrophilin 1                  | <a href="#">Lphn1</a>         | 1.282 | 5.265 | 0.0010606   | 0.0136928 |
| 1715 | 10405263 | <a href="#">NM_176987</a>          | <a href="#">319719</a> | RIKEN cDNA 4732471D19 gene     | <a href="#">4732471D19Rik</a> | 1.282 | 3.11  | 0.0164506   | 0.0962721 |
| 1716 | 10528036 |                                    |                        |                                |                               | 1.282 | 1.976 | 0.0874618   | 0.284638  |
| 1717 | 10604347 | <a href="#">NM_053123</a>          | <a href="#">93761</a>  | SWI/SNF related, matrix associ | <a href="#">Smarcal1</a>      | 1.282 | 3.687 | 0.00738882  | 0.0548365 |
| 1718 | 10363070 | <a href="#">NM_008147</a>          | <a href="#">14727</a>  | glycoprotein 49 A              | <a href="#">Gp49a</a>         | 1.282 | 5.431 | 0.000882773 | 0.011988  |
| 1719 | 10385466 | <a href="#">NM_011891</a>          | <a href="#">24052</a>  | sarcoglycan, delta (dystrophin | <a href="#">Sgcd</a>          | 1.281 | 2.812 | 0.0252854   | 0.128363  |
| 1720 | 10427420 | <a href="#">NM_134099</a>          | <a href="#">106052</a> | F-box protein 4                | <a href="#">Fbxo4</a>         | 1.281 | 2.776 | 0.0266306   | 0.132645  |
| 1721 | 10458983 | <a href="#">NM_177115</a>          | <a href="#">320253</a> | membrane-associated ring finge | <a href="#">March3</a>        | 1.281 | 4.232 | 0.00362634  | 0.0326556 |
| 1722 | 10497773 | <a href="#">NM_023644</a>          | <a href="#">72039</a>  | methylcrotonoyl-Coenzyme A car | <a href="#">Mccc1</a>         | 1.281 | 3.608 | 0.00821782  | 0.059041  |
| 1723 | 10415642 | <a href="#">NM_009119</a>          | <a href="#">20220</a>  | Sin3-associated polypeptide 18 | <a href="#">Sap18</a>         | 1.281 | 3.143 | 0.0156829   | 0.0930667 |
| 1724 | 10546024 | <a href="#">NM_021381</a>          | <a href="#">58182</a>  | prokineticin receptor 1        | <a href="#">Prokr1</a>        | 1.281 | 3.339 | 0.0119034   | 0.0763612 |
| 1725 | 10435487 | <a href="#">NM_027113</a>          | <a href="#">69544</a>  | WD repeat domain 5B            | <a href="#">Wdr5b</a>         | 1.28  | 1.978 | 0.0872245   | 0.284259  |
| 1726 | 10547410 | <a href="#">NM_053204</a>          | <a href="#">111173</a> | ELKS/RAB6-interacting/CAST fam | <a href="#">Erc1</a>          | 1.28  | 4.597 | 0.00230873  | 0.0240828 |
| 1727 | 10502299 | <a href="#">NM_008689</a>          | <a href="#">18033</a>  | nuclear factor of kappa light  | <a href="#">Nfkb1</a>         | 1.28  | 3.071 | 0.0173982   | 0.0997203 |
| 1728 | 10356172 | <a href="#">BC080290</a>           | <a href="#">98496</a>  | RIKEN cDNA 5033414K04 gene     | <a href="#">5033414K04Rik</a> | 1.28  | 3.945 | 0.00524283  | 0.0426527 |
| 1729 | 10448208 | <a href="#">BC120908</a>           | <a href="#">210853</a> | predicted gene, EG210853       | <a href="#">EG210853</a>      | 1.28  | 2.565 | 0.0363794   | 0.162967  |
| 1730 | 10439514 | <a href="#">NM_008083</a>          | <a href="#">14432</a>  | growth associated protein 43   | <a href="#">Gap43</a>         | 1.28  | 3.449 | 0.0102122   | 0.0689861 |
| 1731 | 10506301 | <a href="#">NM_001122899</a>       | <a href="#">16847</a>  | leptin receptor                | <a href="#">Lepr</a>          | 1.28  | 2.083 | 0.0745703   | 0.258248  |
| 1732 | 10502537 | <a href="#">NM_019464</a>          | <a href="#">54673</a>  | SH3-domain GRB2-like B1 (endop | <a href="#">Sh3glb1</a>       | 1.279 | 4.52  | 0.00253553  | 0.0256417 |
| 1733 | 10607924 | <a href="#">NM_001081978</a>       | <a href="#">11704</a>  | amelogenin X chromosome        | <a href="#">Amelx</a>         | 1.279 | 2.474 | 0.0415842   | 0.177907  |
| 1734 | 10578690 | <a href="#">NM_146208</a>          | <a href="#">234258</a> | nei like 3 (E. coli)           | <a href="#">Neil3</a>         | 1.279 | 3.862 | 0.00585257  | 0.0462086 |
| 1735 | 10390186 | <a href="#">NM_025659</a>          | <a href="#">66610</a>  | ABI gene family, member 3      | <a href="#">Abi3</a>          | 1.278 | 3.898 | 0.00558083  | 0.0447652 |
| 1736 | 10389047 | <a href="#">NM_001034013</a>       | <a href="#">11418</a>  | amiloride-sensitive cation cha | <a href="#">Accn1</a>         | 1.278 | 4.875 | 0.00165672  | 0.0187471 |
| 1737 | 10554650 | <a href="#">XM_912445</a>          | <a href="#">619808</a> | hypothetical LOC619808         | <a href="#">LOC619808</a>     | 1.278 | 2.11  | 0.0716276   | 0.251535  |
| 1738 | 10392808 | <a href="#">NM_145437</a>          | <a href="#">217305</a> | RIKEN cDNA 4732429D16 gene     | <a href="#">4732429D16Rik</a> | 1.278 | 3.149 | 0.0155589   | 0.0926698 |
| 1739 | 10450876 | <a href="#">NM_001011721</a>       | <a href="#">258218</a> | olfactory receptor 102         | <a href="#">Olfr102</a>       | 1.278 | 2.13  | 0.0695219   | 0.247137  |
| 1740 | 10524312 | <a href="#">ENSMUST00000100894</a> | <a href="#">209683</a> | tetratricopeptide repeat domai | <a href="#">Ttc28</a>         | 1.278 | 3.424 | 0.0105854   | 0.0706269 |
| 1741 | 10458130 | <a href="#">NM_177773</a>          | <a href="#">271508</a> | RIKEN cDNA 4933408B17 gene     | <a href="#">4933408B17Rik</a> | 1.278 | 1.687 | 0.134225    | 0.369304  |
| 1742 | 10578986 | <a href="#">NM_030263</a>          | <a href="#">234353</a> | pleckstrin and Sec7 domain con | <a href="#">Psd3</a>          | 1.277 | 1.811 | 0.111808    | 0.331009  |
| 1743 | 10471505 | <a href="#">NM_013781</a>          | <a href="#">27387</a>  | SH2 domain containing 3C       | <a href="#">Sh2d3c</a>        | 1.277 | 3.848 | 0.00595845  | 0.0467952 |
| 1744 | 10529091 | <a href="#">ENSMUST00000101411</a> | <a href="#">17527</a>  | Mpv17 transgene, kidney diseas | <a href="#">Mpv17</a>         | 1.277 | 2.075 | 0.0754873   | 0.25974   |
| 1745 | 10491962 | <a href="#">NM_019739</a>          | <a href="#">56458</a>  | forkhead box O1                | <a href="#">Foxo1</a>         | 1.277 | 2.779 | 0.0265271   | 0.132276  |
| 1746 | 10501456 | <a href="#">ENSMUST00000146924</a> | <a href="#">399739</a> | RIKEN cDNA B430201A12          | <a href="#">B430201A12Rik</a> | 1.276 | 2.526 | 0.0384045   | 0.160639  |

|      |          |                              |                        |                                  |                               |       |       |            |           |
|------|----------|------------------------------|------------------------|----------------------------------|-------------------------------|-------|-------|------------|-----------|
| 1747 | 10598178 | <a href="#">NM_026866</a>    | <a href="#">68897</a>  | gene                             | <a href="#">Disp1</a>         | 1.276 | 1.895 | 0.0987631  | 0.306809  |
| 1748 | 10573082 | <a href="#">NM_001024617</a> | <a href="#">234515</a> | dispatched homolog 1 (Drosophi   | <a href="#">Inpp4b</a>        | 1.276 | 3.711 | 0.0071487  | 0.0534688 |
| 1749 | 10537770 | <a href="#">NM_011777</a>    | <a href="#">22793</a>  | inositol polyphosphate-4-phosp   | <a href="#">Zyx</a>           | 1.276 | 4.303 | 0.00331732 | 0.0306428 |
| 1750 | 10395252 | <a href="#">BC028641</a>     | <a href="#">72123</a>  | zyxin                            | <a href="#">2010109K11Rik</a> | 1.276 | 2.863 | 0.0234859  | 0.121892  |
| 1751 | 10581992 | <a href="#">NM_001025577</a> | <a href="#">17132</a>  | RIKEN cDNA 2010109K11<br>gene    | <a href="#">Maf</a>           | 1.276 | 2.301 | 0.0538333  | 0.210683  |
| 1752 | 10574166 | <a href="#">NM_153507</a>    | <a href="#">234577</a> | avian musculoaponeurotic fibro   | <a href="#">Cpne2</a>         | 1.276 | 3.341 | 0.0118761  | 0.0762783 |
| 1753 | 10388241 | <a href="#">NM_031251</a>    | <a href="#">83429</a>  | copine II                        | <a href="#">Ctns</a>          | 1.276 | 1.617 | 0.148605   | 0.390955  |
| 1754 | 10384486 | <a href="#">NM_026576</a>    | <a href="#">68145</a>  | cystinosis, nephropathic         | <a href="#">Etaa1</a>         | 1.275 | 4.662 | 0.0021345  | 0.02284   |
| 1755 | 10458303 | <a href="#">NM_001033141</a> | <a href="#">68545</a>  | Ewing's tumor-associated antig   | <a href="#">1110006O17Rik</a> | 1.275 | 4.399 | 0.00294003 | 0.028407  |
| 1756 | 10465820 | <a href="#">NM_010316</a>    | <a href="#">14704</a>  | RIKEN cDNA 1110006O17<br>gene    | <a href="#">Gng3</a>          | 1.275 | 1.61  | 0.150177   | 0.39328   |
| 1757 | 10585956 |                              |                        | guanine nucleotide binding pro   |                               | 1.275 | 3.468 | 0.0099532  | 0.0679092 |
| 1758 | 10494821 | <a href="#">NM_027533</a>    | <a href="#">70747</a>  | tetraspanin 2                    | <a href="#">Tspan2</a>        | 1.275 | 2.232 | 0.059724   | 0.225162  |
| 1759 | 10558515 | <a href="#">NM_183144</a>    | <a href="#">212111</a> | inositol polyphosphate-5-phosp   | <a href="#">Inpp5a</a>        | 1.274 | 2.339 | 0.0509018  | 0.203376  |
| 1760 | 10497441 | <a href="#">NM_013755</a>    | <a href="#">27357</a>  | glycogenin                       | <a href="#">Gyg</a>           | 1.274 | 3.411 | 0.0107728  | 0.0715167 |
| 1761 | 10442172 | <a href="#">NM_145483</a>    | <a href="#">224585</a> | zinc finger protein 160          | <a href="#">Zfp160</a>        | 1.274 | 3.105 | 0.0165531  | 0.0966314 |
| 1762 | 10483604 | <a href="#">NM_172436</a>    | <a href="#">78830</a>  | solute carrier family 25 (mito   | <a href="#">Slc25a12</a>      | 1.274 | 2.761 | 0.0272504  | 0.134591  |
| 1763 | 10548940 | <a href="#">NM_207222</a>    | <a href="#">109593</a> | LIM domain only 3                | <a href="#">Lmo3</a>          | 1.274 | 3.707 | 0.00718615 | 0.0536715 |
| 1764 | 10391025 | <a href="#">NM_008469</a>    | <a href="#">16665</a>  | keratin 15                       | <a href="#">Krt15</a>         | 1.274 | 4.86  | 0.00168607 | 0.0189428 |
| 1765 | 10530201 | <a href="#">NM_009466</a>    | <a href="#">22235</a>  | UDP-glucose dehydrogenase        | <a href="#">Ugdh</a>          | 1.273 | 3.074 | 0.0173186  | 0.0994394 |
| 1766 | 10455873 | <a href="#">NM_009194</a>    | <a href="#">20496</a>  | solute carrier family 12, memb   | <a href="#">Slc12a2</a>       | 1.273 | 2.395 | 0.046772   | 0.192103  |
| 1767 | 10600024 | <a href="#">NM_010340</a>    | <a href="#">14765</a>  | G-protein-coupled receptor 50    | <a href="#">Gpr50</a>         | 1.273 | 1.305 | 0.232114   | 0.502819  |
| 1768 | 10474073 | <a href="#">BC096456</a>     | <a href="#">399569</a> | RIKEN cDNA C230071H18<br>gene    | <a href="#">C230071H18Rik</a> | 1.273 | 2.162 | 0.0662852  | 0.240359  |
| 1769 | 10542172 | <a href="#">NM_019985</a>    | <a href="#">56760</a>  | C-type lectin domain family 1,   | <a href="#">Clec1b</a>        | 1.273 | 1.733 | 0.125486   | 0.354754  |
| 1770 | 10386937 | <a href="#">NM_138949</a>    | <a href="#">192651</a> | zinc finger protein 286          | <a href="#">Zfp286</a>        | 1.272 | 2.282 | 0.0553521  | 0.214629  |
| 1771 | 10545045 | <a href="#">NM_153574</a>    | <a href="#">58909</a>  | RIKEN cDNA D430015B01<br>gene    | <a href="#">D430015B01Rik</a> | 1.272 | 2.038 | 0.0797713  | 0.269041  |
| 1772 | 10388591 | <a href="#">NM_007754</a>    | <a href="#">12874</a>  | carboxypeptidase D               | <a href="#">Cpd</a>           | 1.272 | 2.673 | 0.0309926  | 0.146897  |
| 1773 | 10439455 | <a href="#">NM_007414</a>    | <a href="#">11544</a>  | ADP-ribosylarginine hydrolase    | <a href="#">Adprh</a>         | 1.272 | 4.468 | 0.00270133 | 0.0269039 |
| 1774 | 10380477 | <a href="#">NM_172261</a>    | <a href="#">217124</a> | protein phosphatase 1, regulat   | <a href="#">Ppp1r9b</a>       | 1.271 | 4.127 | 0.00414256 | 0.0357925 |
| 1775 | 10346551 | <a href="#">NM_207653</a>    | <a href="#">12633</a>  | CASP8 and FADD-like<br>apoptosis | <a href="#">Cflar</a>         | 1.271 | 3.141 | 0.0157282  | 0.0932316 |
| 1776 | 10436892 | <a href="#">NM_010587</a>    | <a href="#">16443</a>  | intersectin 1 (SH3 domain prot   | <a href="#">Itsn1</a>         | 1.271 | 4.357 | 0.00309909 | 0.029358  |
| 1777 | 10370544 | <a href="#">BC082302</a>     | <a href="#">72128</a>  | RIKEN cDNA 2610008E11 gene       | <a href="#">2610008E11Rik</a> | 1.271 | 3.002 | 0.0191974  | 0.106734  |
| 1778 | 10346562 | <a href="#">NM_207653</a>    | <a href="#">12633</a>  | CASP8 and FADD-like<br>apoptosis | <a href="#">Cflar</a>         | 1.27  | 2.95  | 0.0206875  | 0.112504  |
| 1779 | 10588786 | <a href="#">NM_177090</a>    | <a href="#">320169</a> | RIKEN cDNA D330022A01<br>gene    | <a href="#">D330022A01Rik</a> | 1.27  | 4.54  | 0.00247285 | 0.0252694 |
| 1780 | 10488522 | <a href="#">NM_207204</a>    | <a href="#">78177</a>  | RIKEN cDNA 4930519N13<br>gene    | <a href="#">4930519N13Rik</a> | 1.27  | 3.866 | 0.00582082 | 0.046044  |
| 1781 | 10407122 |                              |                        |                                  |                               | 1.27  | 1.369 | 0.212132   | 0.477618  |
| 1782 | 10532586 | <a href="#">XM_912851</a>    | <a href="#">74376</a>  | myosin XVIIIb                    | <a href="#">Myo18b</a>        | 1.27  | 1.772 | 0.118344   | 0.343378  |
| 1783 | 10469322 | <a href="#">NM_011701</a>    | <a href="#">22352</a>  | vimentin                         | <a href="#">Vim</a>           | 1.27  | 5.086 | 0.00129834 | 0.01585   |
| 1784 | 10388996 | <a href="#">NM_018776</a>    | <a href="#">54394</a>  | cytokine receptor-like factor    | <a href="#">Crlf3</a>         | 1.269 | 2.595 | 0.0347771  | 0.158373  |
| 1785 | 10554013 | <a href="#">NM_001081163</a> | <a href="#">269941</a> | carbohydrate (chondroitin) syn   | <a href="#">Chsy1</a>         | 1.269 | 4.668 | 0.00211884 | 0.0226955 |
| 1786 | 10440469 | <a href="#">XR_031351</a>    | <a href="#">547311</a> | similar to Scr3                  | <a href="#">LOC547311</a>     | 1.269 | 4.418 | 0.00287324 | 0.0280221 |
| 1787 | 10497731 | <a href="#">NM_026222</a>    | <a href="#">51938</a>  | coiled-coil domain containing    | <a href="#">Ccdc39</a>        | 1.269 | 3.076 | 0.0172736  | 0.0993516 |
| 1788 | 10396877 | <a href="#">NM_001081421</a> | <a href="#">108760</a> | UDP-N-acetyl-alpha-D-galactosa   | <a href="#">Galnt1</a>        | 1.269 | 3.676 | 0.0074987  | 0.0554767 |
| 1789 | 10495830 | <a href="#">NM_027135</a>    | <a href="#">69608</a>  | SEC24 related gene family, mem   | <a href="#">Sec24d</a>        | 1.269 | 3.261 | 0.0132814  | 0.0828141 |
| 1790 | 10415411 | <a href="#">BC057379</a>     | <a href="#">277154</a> | cDNA sequence BC030046           | <a href="#">BC030046</a>      | 1.268 | 3.323 | 0.0121747  | 0.0775627 |
| 1791 | 10527832 | <a href="#">NM_175310</a>    | <a href="#">100710</a> | PDS5, regulator of cohesion ma   | <a href="#">Pds5b</a>         | 1.268 | 3.884 | 0.00568001 | 0.0452369 |
| 1792 | 10406622 | <a href="#">BC134387</a>     | <a href="#">218444</a> | predicted gene, EG218444         | <a href="#">EG218444</a>      | 1.268 | 3.726 | 0.0070114  | 0.0526453 |
| 1793 | 10561008 | <a href="#">NM_001039185</a> | <a href="#">26365</a>  | CEA-related cell adhesion mole   | <a href="#">Ceacam1</a>       | 1.268 | 2.609 | 0.0340777  | 0.156165  |
| 1794 | 10565712 | <a href="#">NM_025408</a>    | <a href="#">66190</a>  | phytoceramidase, alkaline        | <a href="#">Pnca</a>          | 1.268 | 2.088 | 0.074072   | 0.257223  |
| 1795 | 10454198 | <a href="#">NM_026301</a>    | <a href="#">67664</a>  | ring finger protein 125          | <a href="#">Rnf125</a>        | 1.268 | 1.088 | 0.311529   | 0.588123  |

|      |          |                                    |                           |                                  |                                    |       |       |             |            |
|------|----------|------------------------------------|---------------------------|----------------------------------|------------------------------------|-------|-------|-------------|------------|
| 1796 | 10567564 | <a href="#">NM_007672</a>          | <a href="#">12585</a>     | cerebellar degeneration-relate   | <a href="#">Cdr2</a>               | 1.268 | 2.939 | 0.0210192   | 0.113467   |
| 1797 | 10496494 | <a href="#">NM_019571</a>          | <a href="#">56224</a>     | tetraspanin 5                    | <a href="#">Tspan5</a>             | 1.268 | 2.229 | 0.0599856   | 0.225803   |
| 1798 | 10512024 | <a href="#">NM_178061</a>          | <a href="#">214944</a>    | MOB1, Mps One Binder kinase ac   | <a href="#">Mobk12b</a>            | 1.268 | 3.822 | 0.00617145  | 0.0478157  |
| 1799 | 10522075 | <a href="#">NM_175174</a>          | <a href="#">71778</a>     | kelch-like 5 (Drosophila)        | <a href="#">Klh5</a>               | 1.267 | 4.717 | 0.00199861  | 0.0216156  |
| 1800 | 10376899 | <a href="#">NM_053169</a>          | <a href="#">94092</a>     | tripartite motif-containing 16   | <a href="#">Trim16</a>             | 1.267 | 3.93  | 0.00535078  | 0.0433807  |
| 1801 | 10500304 | <a href="#">NM_013841</a>          | <a href="#">22365</a>     | vacuolar protein sorting 45 (y   | <a href="#">Vps45</a>              | 1.267 | 2.61  | 0.034007    | 0.156      |
| 1802 | 10435162 | <a href="#">NM_001081255</a>       | <a href="#">70144</a>     | leucine-rich repeats and calpo   | <a href="#">Lrch3</a>              | 1.266 | 5.802 | 0.000593709 | 0.00916676 |
| 1803 | 10591114 | <a href="#">NM_001080814</a>       | <a href="#">270120</a>    | FAT tumor suppressor homolog 3   | <a href="#">Fat3</a>               | 1.266 | 2.431 | 0.0443521   | 0.185883   |
| 1804 | 10515803 | <a href="#">BC062805</a>           | <a href="#">68625</a>     | RIKEN cDNA 1110020C03 gene       | <a href="#">1110020C03Rik</a>      | 1.266 | 2.301 | 0.0538813   | 0.210688   |
| 1805 | 10578021 | <a href="#">XM_892922</a>          | <a href="#">628189</a>    | predicted gene, EG628189         | <a href="#">EG628189</a>           | 1.266 | 1.221 | 0.260572    | 0.535075   |
| 1806 | 10502696 | <a href="#">NM_027617</a>          | <a href="#">70951</a>     | spermatogenesis associated 1     | <a href="#">Spata1</a>             | 1.266 | 1.513 | 0.172799    | 0.425141   |
| 1807 | 10526797 | <a href="#">NM_016964</a>          | <a href="#">50878</a>     | stromal antigen 3                | <a href="#">Stag3</a>              | 1.266 | 1.493 | 0.177791    | 0.432292   |
| 1808 | 10529752 | <a href="#">NM_007524</a>          | <a href="#">12020</a>     | NK3 homeobox 2                   | <a href="#">Nkx3-2</a>             | 1.266 | 4.749 | 0.0019229   | 0.0209827  |
| 1809 | 10591164 |                                    |                           |                                  |                                    | 1.265 | 2.706 | 0.029521    | 0.141958   |
| 1810 | 10585467 | <a href="#">NM_177351</a>          | <a href="#">235386</a>    | RIKEN cDNA C630028N24 gene       | <a href="#">C630028N24Rik</a>      | 1.265 | 3.524 | 0.00921158  | 0.0640058  |
| 1811 | 10479297 | <a href="#">NM_177727</a>          | <a href="#">241846</a>    | LSM14 homolog B (SCD6, S. cere   | <a href="#">Lsm14b</a>             | 1.265 | 3.435 | 0.0104257   | 0.0699422  |
| 1812 | 10358717 | <a href="#">BC034723</a>           | <a href="#">69399</a>     | RIKEN cDNA 1700025G04 gene       | <a href="#">1700025G04Rik</a>      | 1.265 | 2.83  | 0.0246266   | 0.126168   |
| 1813 | 10471994 | <a href="#">NM_008449</a>          | <a href="#">16574</a>     | kinesin family member 5C         | <a href="#">Kif5c</a>              | 1.265 | 2.583 | 0.0354101   | 0.1603     |
| 1814 | 10476969 | <a href="#">NM_153781</a>          | <a href="#">110078</a>    | brain glycogen phosphorylase     | <a href="#">Pygb</a>               | 1.265 | 1.878 | 0.101194    | 0.311538   |
| 1815 | 10375578 | <a href="#">NM_008029</a>          | <a href="#">14257</a>     | FMS-like tyrosine kinase 4       | <a href="#">Flt4</a>               | 1.265 | 3.276 | 0.0130069   | 0.0815434  |
| 1816 | 10532888 | <a href="#">ENSMUST00000064959</a> | <a href="#">67642</a>     | RIKEN cDNA 4930515G01 gene       | <a href="#">4930515G01Rik</a>      | 1.264 | 2.663 | 0.0314339   | 0.148244   |
| 1817 | 10372652 | <a href="#">NM_013590</a>          | <a href="#">17110</a>     | lysozyme 1                       | <a href="#">Lyz1</a>               | 1.264 | 2.413 | 0.0455796   | 0.188847   |
| 1818 | 10470314 |                                    |                           |                                  |                                    | 1.264 | 1.064 | 0.321647    | 0.598461   |
| 1819 | 10558227 | <a href="#">NM_025826</a>          | <a href="#">66885</a>     | acyl-Coenzyme A dehydrogenase,   | <a href="#">Acad5b</a>             | 1.264 | 1.518 | 0.171558    | 0.423765   |
| 1820 | 10531544 | <a href="#">NM_198422</a>          | <a href="#">231474</a>    | progesterone and adipoQ receptor | <a href="#">Paqr3</a>              | 1.264 | 3.416 | 0.0106917   | 0.0711345  |
| 1821 | 10564209 |                                    |                           |                                  |                                    | 1.263 | 2.197 | 0.0628569   | 0.232269   |
| 1822 | 10478718 | <a href="#">NM_008679</a>          | <a href="#">17979</a>     | nuclear receptor coactivator 3   | <a href="#">Nco3</a>               | 1.263 | 3.625 | 0.00803303  | 0.0581636  |
| 1823 | 10478698 | <a href="#">NM_010165</a>          | <a href="#">14049</a>     | eyes absent 2 homolog (Drosoph   | <a href="#">Eya2</a>               | 1.263 | 3.769 | 0.00661578  | 0.0504632  |
| 1824 | 10600044 | <a href="#">NM_001081135</a>       | <a href="#">208748</a>    | proline rich Gla (G-carboxyglu   | <a href="#">Prrg3</a>              | 1.263 | 1.624 | 0.147231    | 0.389278   |
| 1825 | 10397172 | <a href="#">NM_172580</a>          | <a href="#">217700</a>    | acyl-CoA thioesterase 6          | <a href="#">Acot6</a>              | 1.263 | 2.951 | 0.0206693   | 0.112434   |
| 1826 | 10406419 | <a href="#">NM_030257</a>          | <a href="#">80289</a>     | LysM, putative peptidoglycan-b   | <a href="#">Lysmd3</a>             | 1.263 | 2.646 | 0.0322642   | 0.150768   |
| 1827 | 10354777 | <a href="#">NM_139146</a>          | <a href="#">212712</a>    | special AT-rich sequence bindi   | <a href="#">Satb2</a>              | 1.263 | 4.206 | 0.00374679  | 0.0333426  |
| 1828 | 10413932 | <a href="#">NM_178791</a>          | <a href="#">320736</a>    | RIKEN cDNA E130203B14 gene       | <a href="#">E130203B14Rik</a>      | 1.262 | 3.196 | 0.0145503   | 0.0884179  |
| 1829 | 10570786 | <a href="#">NM_019576</a>          | <a href="#">56229</a>     | thrombospondin, type I, domain   | <a href="#">Thsd1</a>              | 1.262 | 5.151 | 0.00120609  | 0.0150621  |
| 1830 | 10453423 | <a href="#">ENSMUST00000095186</a> | <a href="#">100038711</a> | predicted gene, ENSMUSG0000007   | <a href="#">ENSMUSG00000071036</a> | 1.262 | 3.152 | 0.0154828   | 0.0923988  |
| 1831 | 10369792 | <a href="#">NM_023598</a>          | <a href="#">71371</a>     | AT rich interactive domain 5B    | <a href="#">Arid5b</a>             | 1.262 | 2.238 | 0.0591502   | 0.223974   |
| 1832 | 10479981 | <a href="#">NM_008091</a>          | <a href="#">14462</a>     | GATA binding protein 3           | <a href="#">Gata3</a>              | 1.262 | 0.764 | 0.469343    | 0.721467   |
| 1833 | 10487154 | <a href="#">NM_177608</a>          | <a href="#">70354</a>     | RIKEN cDNA 3110001I20 gene       | <a href="#">3110001I20Rik</a>      | 1.262 | 3.893 | 0.00561242  | 0.0449164  |
| 1834 | 10533529 | <a href="#">NM_145358</a>          | <a href="#">207565</a>    | calcium/calmodulin-dependent p   | <a href="#">Camk2</a>              | 1.261 | 4.421 | 0.00286216  | 0.0279701  |
| 1835 | 10461844 | <a href="#">NM_008139</a>          | <a href="#">14682</a>     | guanine nucleotide binding pro   | <a href="#">Gnaq</a>               | 1.261 | 2.929 | 0.0213377   | 0.114364   |
| 1836 | 10400057 | <a href="#">NM_001039515</a>       | <a href="#">11861</a>     | ADP-ribosylation factor-like 4   | <a href="#">Arl4a</a>              | 1.261 | 2.915 | 0.0217611   | 0.115928   |
| 1837 | 10449652 | <a href="#">ENSMUST00000066999</a> | <a href="#">791320</a>    | predicted gene, ENSMUSG0000005   | <a href="#">ENSMUSG00000054148</a> | 1.261 | 1.706 | 0.130462    | 0.362435   |
| 1838 | 10585703 | <a href="#">NM_133982</a>          | <a href="#">102614</a>    | ribonuclease P 25 subunit (hum   | <a href="#">Rpp25</a>              | 1.261 | 1.875 | 0.101683    | 0.312363   |
| 1839 | 10522217 | <a href="#">NM_001001980</a>       | <a href="#">77569</a>     | LIM and calponin homology doma   | <a href="#">Limch1</a>             | 1.261 | 4.025 | 0.00472535  | 0.0396008  |
| 1840 | 10586591 | <a href="#">NM_178396</a>          | <a href="#">76459</a>     | carbonic anhydrase 12            | <a href="#">Car12</a>              | 1.26  | 3.765 | 0.00665757  | 0.0506729  |
| 1841 | 10497237 | <a href="#">NM_053182</a>          | <a href="#">94212</a>     | phosphoprotein associated with   | <a href="#">Pag1</a>               | 1.26  | 3.89  | 0.00563638  | 0.0450399  |
| 1842 | 10351140 | <a href="#">NM_010629</a>          | <a href="#">16579</a>     | kinesin-associated protein 3     | <a href="#">Kifap3</a>             | 1.26  | 3.738 | 0.00689977  | 0.0519471  |
| 1843 | 10602977 | <a href="#">NM_133194</a>          | <a href="#">107815</a>    | sex comb on midleg-like 2 (Dro   | <a href="#">Scml2</a>              | 1.26  | 3.231 | 0.0138534   | 0.0853484  |

|      |          |                                    |                           |                                   |                                    |       |       |             |           |
|------|----------|------------------------------------|---------------------------|-----------------------------------|------------------------------------|-------|-------|-------------|-----------|
| 1844 | 10344879 | <a href="#">NM_177173</a>          | <a href="#">320492</a>    | RIKEN cDNA A830018L16 gene        | <a href="#">A830018L16Rik</a>      | 1.26  | 0.92  | 0.387513    | 0.656379  |
| 1845 | 10601449 | <a href="#">NM_019989</a>          | <a href="#">56726</a>     | SH3-binding domain glutamic ac    | <a href="#">Sh3bgrl</a>            | 1.259 | 5.072 | 0.00131991  | 0.0160208 |
| 1846 | 10518147 | <a href="#">NM_010329</a>          | <a href="#">14726</a>     | podoplanin                        | <a href="#">Pdpn</a>               | 1.259 | 1.047 | 0.329081    | 0.605314  |
| 1847 | 10514576 | <a href="#">NM_172872</a>          | <a href="#">242553</a>    | KN motif and ankyrin repeat do    | <a href="#">Kank4</a>              | 1.259 | 2.642 | 0.0324478   | 0.151318  |
| 1848 | 10422059 | <a href="#">NM_177715</a>          | <a href="#">239217</a>    | potassium channel tetramerisat    | <a href="#">Kctd12</a>             | 1.259 | 3.36  | 0.0115608   | 0.074982  |
| 1849 | 10524310 | <a href="#">BC002262</a>           | <a href="#">209683</a>    | tetratricopeptide repeat domai    | <a href="#">Ttc28</a>              | 1.259 | 3.222 | 0.014025    | 0.0859548 |
| 1850 | 10375079 | <a href="#">NM_173784</a>          | <a href="#">327900</a>    | ubiquitin domain containing 2     | <a href="#">Ubt2</a>               | 1.259 | 3.454 | 0.0101495   | 0.0686937 |
| 1851 | 10404404 | <a href="#">NM_010225</a>          | <a href="#">14238</a>     | forkhead box F2                   | <a href="#">Foxf2</a>              | 1.258 | 2.955 | 0.0205324   | 0.112035  |
| 1852 | 10495896 | <a href="#">NM_001025439</a>       | <a href="#">108058</a>    | calcium/calmodulin-dependent p    | <a href="#">Camk2d</a>             | 1.258 | 1.357 | 0.215813    | 0.482925  |
| 1853 | 10413574 | <a href="#">NM_019460</a>          | <a href="#">54650</a>     | Scm-like with four mbt domains    | <a href="#">Sfmbt1</a>             | 1.258 | 2.77  | 0.0268932   | 0.133446  |
| 1854 | 10563085 | <a href="#">NM_010189</a>          | <a href="#">14132</a>     | Fc receptor, IgG, alpha chain     | <a href="#">Fcgrt</a>              | 1.258 | 5     | 0.001433    | 0.0168502 |
| 1855 | 10351380 | <a href="#">XM_001473525</a>       | <a href="#">100039795</a> | similar to C1orf32 putative pr    | <a href="#">LOC100039795</a>       | 1.258 | 3.032 | 0.018379    | 0.103545  |
| 1856 | 10606725 | <a href="#">XR_032258</a>          | <a href="#">665936</a>    | hypothetical LOC665936            | <a href="#">LOC665936</a>          | 1.258 | 4.466 | 0.00270899  | 0.0269567 |
| 1857 | 10394942 | <a href="#">NM_020614</a>          | <a href="#">21340</a>     | TATA box binding protein (Tbp)    | <a href="#">Taf1b</a>              | 1.258 | 4.097 | 0.00430681  | 0.0367784 |
| 1858 | 10544523 | <a href="#">NR_004419</a>          | <a href="#">19872</a>     | RNA, Y1 small cytoplasmic, Ro-    | <a href="#">Rny1</a>               | 1.258 | 1.926 | 0.0942964   | 0.298038  |
| 1859 | 10500434 | <a href="#">NM_029933</a>          | <a href="#">77578</a>     | B-cell CLL/lymphoma 9             | <a href="#">Bcl9</a>               | 1.257 | 5.551 | 0.000775302 | 0.011002  |
| 1860 | 10452430 | <a href="#">ENSMUST00000024761</a> | <a href="#">50758</a>     | F-box and leucine-rich repeat     | <a href="#">Fbx17</a>              | 1.257 | 3.69  | 0.00736081  | 0.0546478 |
| 1861 | 10415396 | <a href="#">NM_023699</a>          | <a href="#">73181</a>     | nuclear factor of activated T-    | <a href="#">Nfatc4</a>             | 1.257 | 3.477 | 0.00983277  | 0.0672657 |
| 1862 | 10406536 |                                    |                           |                                   |                                    | 1.257 | 1.906 | 0.0971039   | 0.303498  |
| 1863 | 10514939 | <a href="#">NM_172874</a>          | <a href="#">242608</a>    | podocan                           | <a href="#">Podn</a>               | 1.257 | 4.091 | 0.00434256  | 0.0370182 |
| 1864 | 10584593 |                                    |                           |                                   |                                    | 1.257 | 2.264 | 0.0569366   | 0.218211  |
| 1865 | 10357122 |                                    |                           |                                   |                                    | 1.256 | 4.259 | 0.00350576  | 0.0317727 |
| 1866 | 10557992 | <a href="#">NM_013863</a>          | <a href="#">29810</a>     | Bcl2-associated athanogene 3      | <a href="#">Bag3</a>               | 1.256 | 3.523 | 0.00922708  | 0.0640924 |
| 1867 | 10431894 | <a href="#">NM_175121</a>          | <a href="#">67760</a>     | solute carrier family 38, memb    | <a href="#">Slc38a2</a>            | 1.256 | 4.447 | 0.00277307  | 0.0273478 |
| 1868 | 10492004 | <a href="#">XR_001873</a>          | <a href="#">666444</a>    | predicted gene, EG666444          | <a href="#">EG666444</a>           | 1.256 | 2.765 | 0.0270986   | 0.134054  |
| 1869 | 10420198 | <a href="#">NM_019955</a>          | <a href="#">56532</a>     | receptor-interacting serine-th    | <a href="#">Ripk3</a>              | 1.256 | 4.263 | 0.00348448  | 0.0316885 |
| 1870 | 10537157 | <a href="#">NM_172398</a>          | <a href="#">67861</a>     | RIKEN cDNA 2310005E10 gene        | <a href="#">2310005E10Rik</a>      | 1.256 | 3.379 | 0.0112592   | 0.0735223 |
| 1871 | 10508651 | <a href="#">NM_011520</a>          | <a href="#">20970</a>     | syndecan 3                        | <a href="#">Sdc3</a>               | 1.256 | 4.274 | 0.0034387   | 0.0314073 |
| 1872 | 10363676 | <a href="#">NM_177612</a>          | <a href="#">216033</a>    | catenin (cadherin associated p    | <a href="#">Cttna3</a>             | 1.256 | 3.179 | 0.0148995   | 0.0898046 |
| 1873 | 10510090 | <a href="#">NM_177571</a>          | <a href="#">194225</a>    | predicted gene,<br>OTTMUSG0000001 | <a href="#">OTTMUSG00000010433</a> | 1.256 | 2.374 | 0.0482507   | 0.196195  |
| 1874 | 10486396 | <a href="#">NM_133838</a>          | <a href="#">98878</a>     | EH-domain containing 4            | <a href="#">Ehd4</a>               | 1.256 | 2.257 | 0.0574816   | 0.219583  |
| 1875 | 10475800 | <a href="#">NM_009633</a>          | <a href="#">11552</a>     | adrenergic receptor, alpha 2b     | <a href="#">Adra2b</a>             | 1.255 | 3.418 | 0.0106649   | 0.0710231 |
| 1876 | 10582378 |                                    |                           |                                   |                                    | 1.255 | 4.421 | 0.00286134  | 0.0279701 |
| 1877 | 10556790 | <a href="#">NM_028129</a>          | <a href="#">434234</a>    | RIKEN cDNA 2610020H08 gene        | <a href="#">2610020H08Rik</a>      | 1.255 | 3.587 | 0.00845344  | 0.0602222 |
| 1878 | 10444665 | <a href="#">NM_016765</a>          | <a href="#">51793</a>     | dimethylarginine dimethylamino    | <a href="#">Ddah2</a>              | 1.255 | 3.408 | 0.0108173   | 0.071604  |
| 1879 | 10361748 | <a href="#">NM_027968</a>          | <a href="#">71865</a>     | F-box protein 30                  | <a href="#">Fbxo30</a>             | 1.254 | 5.459 | 0.000856874 | 0.0117343 |
| 1880 | 10428171 | <a href="#">NM_175134</a>          | <a href="#">68839</a>     | ankyrin repeat domain 46          | <a href="#">Ankrd46</a>            | 1.254 | 2.788 | 0.0261703   | 0.131     |
| 1881 | 10348244 | <a href="#">NM_010566</a>          | <a href="#">16331</a>     | inositol polyphosphate-5-phosp    | <a href="#">Inpp5d</a>             | 1.254 | 4.348 | 0.00313262  | 0.0295565 |
| 1882 | 10382228 | <a href="#">NM_015732</a>          | <a href="#">12006</a>     | axin2                             | <a href="#">Axin2</a>              | 1.254 | 2.299 | 0.0540112   | 0.211054  |
| 1883 | 10538715 | <a href="#">BC107398</a>           | <a href="#">232035</a>    | RIKEN cDNA C130092O11 gene        | <a href="#">C130092O11Rik</a>      | 1.254 | 2.581 | 0.0355142   | 0.16052   |
| 1884 | 10531189 | <a href="#">NM_001081401</a>       | <a href="#">330119</a>    | a disintegrin-like and metallo    | <a href="#">Adamts3</a>            | 1.254 | 3.183 | 0.0148231   | 0.0893698 |
| 1885 | 10416709 | <a href="#">NM_172605</a>          | <a href="#">219249</a>    | tudor domain containing 3         | <a href="#">Ttdr3</a>              | 1.253 | 2.926 | 0.0214369   | 0.114576  |
| 1886 | 10357158 | <a href="#">NM_022327</a>          | <a href="#">64143</a>     | v-ral simian leukemia viral on    | <a href="#">Ralb</a>               | 1.253 | 4.421 | 0.00286263  | 0.0279701 |
| 1887 | 10565218 | <a href="#">NM_010551</a>          | <a href="#">16170</a>     | interleukin 16                    | <a href="#">Il16</a>               | 1.253 | 2.853 | 0.0238282   | 0.123212  |
| 1888 | 10601768 | <a href="#">ENSMUST00000055842</a> | <a href="#">102910</a>    | armadillo repeat containing, X    | <a href="#">Armex4</a>             | 1.253 | 3.525 | 0.00920186  | 0.0639593 |
| 1889 | 10458589 | <a href="#">NM_029942</a>          | <a href="#">77619</a>     | PRELI domain containing 2         | <a href="#">Preli2</a>             | 1.253 | 1.153 | 0.285524    | 0.560861  |
| 1890 | 10452516 | <a href="#">NM_001025572</a>       | <a href="#">106585</a>    | ankyrin repeat domain 12          | <a href="#">Ankrd12</a>            | 1.253 | 3.653 | 0.00773036  | 0.0566947 |
| 1891 | 10382106 | <a href="#">ENSMUST00000106794</a> | <a href="#">380732</a>    | gene model 885, (NCBI)            | <a href="#">Gm885</a>              | 1.253 | 1.203 | 0.266815    | 0.541465  |
| 1892 | 10522712 | <a href="#">NM_011263</a>          | <a href="#">19712</a>     | RE1-silencing transcription fa    | <a href="#">Rest</a>               | 1.252 | 3.314 | 0.0123291   | 0.0782223 |
| 1893 | 10557058 | <a href="#">ENSMUST00000098072</a> | <a href="#">26939</a>     | polymerase (RNA) III (DNA dire    | <a href="#">Polr3e</a>             | 1.252 | 1.828 | 0.108964    | 0.325894  |
| 1894 | 10410366 | <a href="#">NM_001001187</a>       | <a href="#">408068</a>    | RIKEN cDNA 3830402I07 gene        | <a href="#">3830402I07Rik</a>      | 1.252 | 3.503 | 0.00948127  | 0.0653855 |
| 1895 | 10423355 | <a href="#">NM_177597</a>          | <a href="#">211147</a>    | membrane-associated ring finge    | <a href="#">March11</a>            | 1.252 | 3.251 | 0.0134772   | 0.0836153 |
| 1896 | 10433403 | <a href="#">NM_021477</a>          | <a href="#">268859</a>    | ataxin 2 binding protein 1        | <a href="#">A2bp1</a>              | 1.252 | 4.078 | 0.00441356  | 0.0375122 |

|      |          |                                    |                           |                                   |                                    |       |       |             |            |
|------|----------|------------------------------------|---------------------------|-----------------------------------|------------------------------------|-------|-------|-------------|------------|
| 1897 | 10424467 | <a href="#">NM_001081409</a>       | <a href="#">239510</a>    | PHD finger protein 20-like 1      | <a href="#">Phf201l</a>            | 1.251 | 3.17  | 0.0150972   | 0.0907637  |
| 1898 | 10587350 | <a href="#">ENSMUST00000113367</a> | <a href="#">100042356</a> | similar to DEAD (Asp-Glu-Ala-A    | <a href="#">LOC100042356</a>       | 1.251 | 1.477 | 0.182023    | 0.438497   |
| 1899 | 10599612 | <a href="#">NM_027642</a>          | <a href="#">70998</a>     | PHD finger protein 6              | <a href="#">Phf6</a>               | 1.251 | 3.304 | 0.0124956   | 0.0790871  |
| 1900 | 10538394 | <a href="#">NM_001001335</a>       | <a href="#">231999</a>    | pleckstrin homology domain con    | <a href="#">Plekha8</a>            | 1.251 | 2.725 | 0.0286977   | 0.139107   |
| 1901 | 10566585 | <a href="#">ENSMUST00000098144</a> | <a href="#">434223</a>    | gene model 1966, (NCBI)           | <a href="#">Gm1966</a>             | 1.251 | 2.731 | 0.0284448   | 0.138452   |
| 1902 | 10516966 | <a href="#">NM_001033308</a>       | <a href="#">230787</a>    | cDNA sequence BC013712            | <a href="#">BC013712</a>           | 1.251 | 3.059 | 0.0176828   | 0.100778   |
| 1903 | 10412466 | <a href="#">NM_145942</a>          | <a href="#">208715</a>    | 3-hydroxy-3-methylglutaryl-Coe    | <a href="#">Hmgcs1</a>             | 1.251 | 3.454 | 0.0101527   | 0.0686937  |
| 1904 | 10386633 | <a href="#">BC031537</a>           | <a href="#">24082</a>     | gene trap locus F3a               | <a href="#">Gtlf3a</a>             | 1.251 | 2.064 | 0.0766996   | 0.262629   |
| 1905 | 10451287 | <a href="#">NM_015783</a>          | <a href="#">53606</a>     | ISG15 ubiquitin-like modifier     | <a href="#">Isg15</a>              | 1.251 | 2.284 | 0.0552489   | 0.214463   |
| 1906 | 10346651 | <a href="#">NM_007561</a>          | <a href="#">12168</a>     | bone morphogenic protein recep    | <a href="#">Bmpr2</a>              | 1.25  | 4.106 | 0.00425571  | 0.0365189  |
| 1907 | 10527961 |                                    |                           |                                   |                                    | 1.25  | 1.467 | 0.184478    | 0.442045   |
| 1908 | 10531181 | <a href="#">NM_001081401</a>       | <a href="#">330119</a>    | a disintegrin-like and metallo    | <a href="#">Adamts3</a>            | 1.25  | 5.142 | 0.00121827  | 0.0151792  |
| 1909 | 10366881 | <a href="#">NM_007837</a>          | <a href="#">13198</a>     | DNA-damage inducible transcrip    | <a href="#">Ddit3</a>              | 1.25  | 4.198 | 0.00378368  | 0.0335861  |
| 1910 | 10352150 |                                    |                           |                                   |                                    | 1.25  | 2.624 | 0.0333399   | 0.154018   |
| 1911 | 10471201 | <a href="#">NM_001112703</a>       | <a href="#">11350</a>     | c-abl oncogene 1, receptor tyr    | <a href="#">Abl1</a>               | 1.25  | 4.305 | 0.00330605  | 0.0306055  |
| 1912 | 10455514 | <a href="#">NM_080465</a>          | <a href="#">140492</a>    | potassium intermediate/small c    | <a href="#">Kenn2</a>              | 1.25  | 2.386 | 0.0474294   | 0.193793   |
| 1913 | 10373325 | <a href="#">NM_007412</a>          | <a href="#">11536</a>     | G protein-coupled receptor 182    | <a href="#">Gpr182</a>             | 1.25  | 2.146 | 0.0678653   | 0.243316   |
| 1914 | 10350136 | <a href="#">NM_007791</a>          | <a href="#">13007</a>     | cysteine and glycine-rich prot    | <a href="#">Csrp1</a>              | 1.25  | 2.644 | 0.0323298   | 0.151017   |
| 1915 | 10566132 | <a href="#">NM_019566</a>          | <a href="#">56212</a>     | ras homolog gene family, membe    | <a href="#">Rhog</a>               | 1.25  | 2.597 | 0.0346913   | 0.158108   |
| 1916 | 10427906 | <a href="#">AK051399</a>           | <a href="#">100038662</a> | predicted gene,<br>ENSMUSG0000007 | <a href="#">ENSMUSG00000072635</a> | 1.25  | 1.63  | 0.145864    | 0.387406   |
| 1917 | 10526014 | <a href="#">NM_172276</a>          | <a href="#">231769</a>    | splicing factor, arginine/seri    | <a href="#">Sfrs8</a>              | 1.25  | 4.173 | 0.00390803  | 0.0343867  |
| 1918 | 10391404 | <a href="#">AK052868</a>           | <a href="#">319412</a>    | RIKEN cDNA D830013H23<br>gene     | <a href="#">D830013H23Rik</a>      | 1.249 | 4.237 | 0.00360059  | 0.0324929  |
| 1919 | 10591094 | <a href="#">NM_001080814</a>       | <a href="#">270120</a>    | FAT tumor suppressor homolog<br>3 | <a href="#">Fat3</a>               | 1.249 | 3.088 | 0.0169619   | 0.0981528  |
| 1920 | 10374333 | <a href="#">NM_001025597</a>       | <a href="#">22778</a>     | IKAROS family zinc finger 1       | <a href="#">Ikzf1</a>              | 1.249 | 3.04  | 0.0181882   | 0.102607   |
| 1921 | 10571162 | <a href="#">NM_007918</a>          | <a href="#">13685</a>     | eukaryotic translation initiat    | <a href="#">Eif4ebp1</a>           | 1.249 | 2.597 | 0.0346593   | 0.158007   |
| 1922 | 10428353 | <a href="#">NM_172814</a>          | <a href="#">239393</a>    | low density lipoprotein-relate    | <a href="#">Lrp12</a>              | 1.249 | 2.384 | 0.0475677   | 0.194239   |
| 1923 | 10490047 | <a href="#">AY702102</a>           | <a href="#">446211</a>    | cDNA sequence AY702102            | <a href="#">AY702102</a>           | 1.249 | 3.234 | 0.0137864   | 0.0850347  |
| 1924 | 10349184 | <a href="#">NM_172853</a>          | <a href="#">241201</a>    | cadherin 7, type 2                | <a href="#">Cdh7</a>               | 1.249 | 3.431 | 0.0104794   | 0.0702     |
| 1925 | 10591612 | <a href="#">NM_177030</a>          | <a href="#">319899</a>    | dedicator of cytokinesis 6        | <a href="#">Dock6</a>              | 1.249 | 5.751 | 0.000626149 | 0.00949734 |
| 1926 | 10526211 |                                    |                           |                                   |                                    | 1.249 | 2.625 | 0.0332799   | 0.153865   |
| 1927 | 10420988 | <a href="#">NM_009955</a>          | <a href="#">12934</a>     | dihydropyrimidinase-like 2        | <a href="#">Dpysl2</a>             | 1.249 | 2.889 | 0.022594    | 0.118837   |
| 1928 | 10539244 | <a href="#">NM_009313</a>          | <a href="#">21336</a>     | tachykinin receptor 1             | <a href="#">Tacr1</a>              | 1.249 | 1.662 | 0.139224    | 0.377453   |
| 1929 | 10596095 | <a href="#">NM_173447</a>          | <a href="#">270190</a>    | Eph receptor B1                   | <a href="#">Ephb1</a>              | 1.248 | 2.984 | 0.0197068   | 0.108737   |
| 1930 | 10584435 | <a href="#">NM_172767</a>          | <a href="#">67776</a>     | loss of heterozygosity, 11, ch    | <a href="#">Loh11cr2a</a>          | 1.248 | 1.568 | 0.159542    | 0.40691    |
| 1931 | 10486595 | <a href="#">NM_001024856</a>       | <a href="#">140810</a>    | tau tubulin kinase 2              | <a href="#">Ttbk2</a>              | 1.248 | 2.839 | 0.0242968   | 0.124965   |
| 1932 | 10431424 | <a href="#">BC007481</a>           | <a href="#">140570</a>    | plexin B2                         | <a href="#">Plxnb2</a>             | 1.248 | 3.119 | 0.0162345   | 0.0954036  |
| 1933 | 10387659 | <a href="#">NM_198862</a>          | <a href="#">216856</a>    | neuroligin 2                      | <a href="#">Nlgn2</a>              | 1.248 | 2.666 | 0.0313399   | 0.148045   |
| 1934 | 10585484 | <a href="#">NM_176844</a>          | <a href="#">110835</a>    | cholinergic receptor, nicotini    | <a href="#">Chrna5</a>             | 1.248 | 2.229 | 0.0599643   | 0.225763   |
| 1935 | 10495449 | <a href="#">NM_007729</a>          | <a href="#">12814</a>     | collagen, type XI, alpha 1        | <a href="#">Col11a1</a>            | 1.248 | 2.93  | 0.0212907   | 0.114228   |
| 1936 | 10359948 | <a href="#">NM_133806</a>          | <a href="#">107652</a>    | UDP-N-acetylglucosamine<br>pyroph | <a href="#">Uap1</a>               | 1.248 | 3.663 | 0.00762562  | 0.0561407  |
| 1937 | 10412011 | <a href="#">NM_008442</a>          | <a href="#">16563</a>     | kinesin family member 2A          | <a href="#">Kif2a</a>              | 1.247 | 4.896 | 0.00161659  | 0.0184067  |
| 1938 | 10388532 | <a href="#">NM_008750</a>          | <a href="#">18230</a>     | nucleoredoxin                     | <a href="#">Nxn</a>                | 1.247 | 3.333 | 0.0120082   | 0.0768465  |
| 1939 | 10457385 | <a href="#">NM_026484</a>          | <a href="#">67974</a>     | cyclin Y                          | <a href="#">Ceny</a>               | 1.247 | 4.628 | 0.00222259  | 0.0234785  |
| 1940 | 10468853 | <a href="#">NM_053198</a>          | <a href="#">94281</a>     | sideroflexin 4                    | <a href="#">Sfxn4</a>              | 1.247 | 1.791 | 0.115196    | 0.337402   |
| 1941 | 10448235 | <a href="#">NM_001110254</a>       | <a href="#">240041</a>    | RIKEN cDNA A630033E08<br>gene     | <a href="#">A630033E08Rik</a>      | 1.246 | 2.4   | 0.0464533   | 0.191627   |
| 1942 | 10437695 | <a href="#">ENSMUST00000063399</a> | <a href="#">100040872</a> | similar to CG2839-PA              | <a href="#">LOC100040872</a>       | 1.246 | 2.732 | 0.0284422   | 0.138452   |
| 1943 | 10406928 | <a href="#">NM_008533</a>          | <a href="#">17079</a>     | CD180 antigen                     | <a href="#">Cd180</a>              | 1.246 | 3.048 | 0.0179776   | 0.101919   |
| 1944 | 10442231 | <a href="#">BC064464</a>           | <a href="#">73229</a>     | RIKEN cDNA 3110052M02<br>gene     | <a href="#">3110052M02Rik</a>      | 1.246 | 2.027 | 0.0811139   | 0.271716   |
| 1945 | 10358064 | <a href="#">NM_153774</a>          | <a href="#">226432</a>    | importin 9                        | <a href="#">Ipo9</a>               | 1.246 | 4.368 | 0.0030573   | 0.0290664  |
| 1946 | 10352916 | <a href="#">BC058715</a>           | <a href="#">320977</a>    | RIKEN cDNA C030002C11<br>gene     | <a href="#">C030002C11Rik</a>      | 1.246 | 1.263 | 0.245897    | 0.51897    |

|      |          |                                    |                           |                                    |                                     |       |       |            |           |
|------|----------|------------------------------------|---------------------------|------------------------------------|-------------------------------------|-------|-------|------------|-----------|
| 1947 | 10503085 | <a href="#">NM_054089</a>          | <a href="#">116940</a>    | trimethylguanosine synthase ho     | <a href="#">Tgs1</a>                | 1.246 | 3.645 | 0.00781686 | 0.0570915 |
| 1948 | 10372145 | <a href="#">NM_172553</a>          | <a href="#">216285</a>    | ALX homeobox 1                     | <a href="#">Alx1</a>                | 1.246 | 2.315 | 0.0527457  | 0.207909  |
| 1949 | 10392739 | <a href="#">NM_172800</a>          | <a href="#">237979</a>    | sidekick homolog 2 (chicken)       | <a href="#">Sdk2</a>                | 1.245 | 3.473 | 0.00988534 | 0.0675551 |
| 1950 | 10399696 | <a href="#">NM_001081977</a>       | <a href="#">108089</a>    | ring finger protein 144A           | <a href="#">Rnf144a</a>             | 1.245 | 2.953 | 0.0206071  | 0.112225  |
| 1951 | 10476989 | <a href="#">BC027537</a>           | <a href="#">69270</a>     | GINS complex subunit 1 (Psf1 h     | <a href="#">Gins1</a>               | 1.245 | 2.1   | 0.0727167  | 0.254178  |
| 1952 | 10589438 | <a href="#">NM_008633</a>          | <a href="#">17758</a>     | microtubule-associated protein     | <a href="#">Mtap4</a>               | 1.245 | 3.094 | 0.0168304  | 0.0977107 |
| 1953 | 10597575 | <a href="#">NM_019676</a>          | <a href="#">18799</a>     | phospholipase C, delta 1           | <a href="#">Pled1</a>               | 1.245 | 2.739 | 0.0281497  | 0.137618  |
| 1954 | 10492180 | <a href="#">NM_001113413</a>       | <a href="#">24017</a>     | ring finger protein 13             | <a href="#">Rnf13</a>               | 1.245 | 1.965 | 0.0889533  | 0.28772   |
| 1955 | 10459391 | <a href="#">NM_007998</a>          | <a href="#">14151</a>     | ferrochelataase                    | <a href="#">Fech</a>                | 1.245 | 2.495 | 0.0403363  | 0.17484   |
| 1956 | 10379727 | <a href="#">NM_001081957</a>       | <a href="#">100034251</a> | predicted gene,<br>OTTMUSG00000000 | <a href="#">OTTMUSG00000000971</a>  | 1.244 | 3.123 | 0.0161408  | 0.0950643 |
| 1957 | 10577996 | <a href="#">AK220417</a>           | <a href="#">210801</a>    | unc-5 homolog D (C. elegans)       | <a href="#">Unc5d</a>               | 1.244 | 2.619 | 0.0335681  | 0.154498  |
| 1958 | 10408915 | <a href="#">NM_025772</a>          | <a href="#">94245</a>     | dystrobrevin binding protein 1     | <a href="#">Dtnbp1</a>              | 1.244 | 4.45  | 0.00276262 | 0.0273085 |
| 1959 | 10584288 | <a href="#">NM_028783</a>          | <a href="#">74144</a>     | roundabout homolog 4 (Drosophi     | <a href="#">Robo4</a>               | 1.244 | 3.684 | 0.00741915 | 0.0549844 |
| 1960 | 10422022 | <a href="#">ENSMUST00000100344</a> | <a href="#">100038742</a> | predicted gene,<br>ENSMUSG00000007 | <a href="#">ENSMUSG000000075488</a> | 1.244 | 1.964 | 0.0891223  | 0.287844  |
| 1961 | 10559547 | <a href="#">NM_011618</a>          | <a href="#">21955</a>     | troponin T1, skeletal, slow        | <a href="#">Tnnt1</a>               | 1.243 | 1.517 | 0.171693   | 0.423956  |
| 1962 | 10554127 | <a href="#">NR_003648</a>          | <a href="#">384639</a>    | predicted gene, EG384639           | <a href="#">EG384639</a>            | 1.243 | 2.974 | 0.0199984  | 0.109859  |
| 1963 | 10346576 | <a href="#">NM_172656</a>          | <a href="#">227154</a>    | amyotrophic lateral sclerosis      | <a href="#">Als2er2</a>             | 1.243 | 2.217 | 0.0610127  | 0.227923  |
| 1964 | 10358982 | <a href="#">NM_008209</a>          | <a href="#">13064</a>     | major histocompatibility compl     | <a href="#">Mrl</a>                 | 1.243 | 2.356 | 0.0495935  | 0.200156  |
| 1965 | 10383309 |                                    |                           |                                    |                                     | 1.243 | 4.104 | 0.00427022 | 0.0365593 |
| 1966 | 10454039 | <a href="#">NM_008378</a>          | <a href="#">16210</a>     | imprinted and ancient              | <a href="#">Impact</a>              | 1.242 | 2.878 | 0.022959   | 0.120303  |
| 1967 | 10397719 | <a href="#">NM_028354</a>          | <a href="#">104884</a>    | tyrosyl-DNA phosphodiesterase      | <a href="#">Tdp1</a>                | 1.242 | 2.233 | 0.0596348  | 0.225083  |
| 1968 | 10580795 | <a href="#">NM_001033533</a>       | <a href="#">234582</a>    | coiled-coil domain containing      | <a href="#">Ccdc102a</a>            | 1.242 | 3.123 | 0.0161505  | 0.0950948 |
| 1969 | 10577963 | <a href="#">NM_029674</a>          | <a href="#">76615</a>     | glutamic-oxaloacetic transamin     | <a href="#">Got11</a>               | 1.242 | 2.478 | 0.0413753  | 0.177544  |
| 1970 | 10514779 | <a href="#">NM_178143</a>          | <a href="#">108079</a>    | protein kinase, AMP-activated,     | <a href="#">Prkaa2</a>              | 1.242 | 2.08  | 0.0749365  | 0.25894   |
| 1971 | 10411059 | <a href="#">NM_173392</a>          | <a href="#">218441</a>    | zinc finger, FYVE domain conta     | <a href="#">Zfyve16</a>             | 1.242 | 2.935 | 0.0211463  | 0.113886  |
| 1972 | 10432636 | <a href="#">NM_174992</a>          | <a href="#">207818</a>    | cDNA sequence BC004728             | <a href="#">BC004728</a>            | 1.242 | 3.223 | 0.0140051  | 0.0858692 |
| 1973 | 10519324 | <a href="#">NM_009873</a>          | <a href="#">12571</a>     | cyclin-dependent kinase 6          | <a href="#">Cdk6</a>                | 1.241 | 2.91  | 0.0219181  | 0.116412  |
| 1974 | 10508479 | <a href="#">NM_008974</a>          | <a href="#">19244</a>     | protein tyrosine phosphatase 4     | <a href="#">Ptp4a2</a>              | 1.241 | 4.514 | 0.00255276 | 0.0257763 |
| 1975 | 10421172 | <a href="#">NM_026331</a>          | <a href="#">67712</a>     | solute carrier family 25, memb     | <a href="#">Slc25a37</a>            | 1.241 | 0.767 | 0.467196   | 0.72007   |
| 1976 | 10503303 | <a href="#">NM_001081183</a>       | <a href="#">66185</a>     | RIKEN cDNA 1110037F02 gene         | <a href="#">1110037F02Rik</a>       | 1.241 | 2.628 | 0.0331431  | 0.153511  |
| 1977 | 10540275 | <a href="#">NM_198612</a>          | <a href="#">232313</a>    | glycosyltransferase 8 domain c     | <a href="#">Glt8d4</a>              | 1.241 | 2.267 | 0.0566183  | 0.217582  |
| 1978 | 10586244 | <a href="#">XM_001476259</a>       | <a href="#">102442</a>    | DENN/MADD domain<br>containing 4A  | <a href="#">Dennd4a</a>             | 1.241 | 1.859 | 0.104088   | 0.31726   |
| 1979 | 10474006 | <a href="#">NM_001109691</a>       | <a href="#">192285</a>    | PHD finger protein 21A             | <a href="#">Phf21a</a>              | 1.241 | 4.13  | 0.00412832 | 0.0357303 |
| 1980 | 10451225 | <a href="#">NM_030715</a>          | <a href="#">80905</a>     | polymerase (DNA directed), eta     | <a href="#">Polh</a>                | 1.241 | 2.903 | 0.0221365  | 0.117189  |
| 1981 | 10426669 | <a href="#">ENSMUST00000039665</a> | <a href="#">78733</a>     | trophinin associated protein       | <a href="#">Troap</a>               | 1.241 | 3.323 | 0.012175   | 0.0775627 |
| 1982 | 10443817 | <a href="#">NM_016670</a>          | <a href="#">18771</a>     | Pbx/knotted 1 homeobox             | <a href="#">Pknx1</a>               | 1.241 | 3.323 | 0.0121751  | 0.0775627 |
| 1983 | 10480714 | <a href="#">NM_001033293</a>       | <a href="#">227620</a>    | UDP-N-acetylglucosamine<br>pyroph  | <a href="#">Uap11</a>               | 1.241 | 3.047 | 0.0179868  | 0.101919  |
| 1984 | 10469571 | <a href="#">ENSMUST00000052168</a> | <a href="#">71198</a>     | OTU domain containing 1            | <a href="#">Otu1</a>                | 1.24  | 2.954 | 0.0205718  | 0.112161  |
| 1985 | 10588899 | <a href="#">NM_008160</a>          | <a href="#">14775</a>     | glutathione peroxidase 1           | <a href="#">Gpx1</a>                | 1.24  | 1.554 | 0.162789   | 0.411428  |
| 1986 | 10532538 | <a href="#">NM_028386</a>          | <a href="#">72898</a>     | aspartate beta-hydroxylase dom     | <a href="#">Asphd2</a>              | 1.24  | 1.892 | 0.0990916  | 0.307348  |
| 1987 | 10520388 | <a href="#">NM_028234</a>          | <a href="#">381626</a>    | proline rich 8                     | <a href="#">Pr8</a>                 | 1.24  | 2.174 | 0.065113   | 0.237986  |
| 1988 | 10519484 | <a href="#">AK141701</a>           | <a href="#">74051</a>     | six transmembrane epithelial a     | <a href="#">Steap2</a>              | 1.24  | 1.83  | 0.108656   | 0.325457  |
| 1989 | 10504775 | <a href="#">NM_009928</a>          | <a href="#">12819</a>     | collagen, type XV, alpha 1         | <a href="#">Col15a1</a>             | 1.24  | 3.29  | 0.012745   | 0.0802505 |
| 1990 | 10591620 | <a href="#">NM_177030</a>          | <a href="#">319899</a>    | dedicator of cytokinesis 6         | <a href="#">Dock6</a>               | 1.239 | 2.334 | 0.0512243  | 0.204433  |
| 1991 | 10352194 | <a href="#">ENSMUST00000097450</a> | <a href="#">226751</a>    | Cdc42 binding protein kinase a     | <a href="#">Cdc42bpa</a>            | 1.239 | 3.832 | 0.00608935 | 0.0474579 |
| 1992 | 10515994 | <a href="#">NM_133716</a>          | <a href="#">69780</a>     | stromal membrane-associated<br>GT  | <a href="#">Smap2</a>               | 1.239 | 2.066 | 0.0765522  | 0.262295  |
| 1993 | 10381445 | <a href="#">NM_144830</a>          | <a href="#">217203</a>    | transmembrane protein 106A         | <a href="#">Tmem106a</a>            | 1.239 | 2.132 | 0.0692697  | 0.246644  |
| 1994 | 10524417 | <a href="#">NM_025526</a>          | <a href="#">66383</a>     | IscU iron-sulfur cluster scaff     | <a href="#">Iscu</a>                | 1.239 | 2.063 | 0.0767962  | 0.262747  |
| 1995 | 10533569 | <a href="#">NM_001003953</a>       | <a href="#">30841</a>     | F-box and leucine-rich repeat      | <a href="#">Fbx110</a>              | 1.239 | 3.751 | 0.00678146 | 0.0513311 |
| 1996 | 10479884 | <a href="#">ENSMUST00000071016</a> | <a href="#">791411</a>    | predicted gene,<br>OTTMUSG00000001 | <a href="#">OTTMUSG00000010878</a>  | 1.239 | 2.03  | 0.0807606  | 0.271306  |
| 1997 | 10404069 | <a href="#">NM_030609</a>          | <a href="#">80838</a>     | histone cluster 1, H1a             | <a href="#">Hist1h1a</a>            | 1.238 | 1.33  | 0.224087   | 0.49422   |
| 1998 | 10458164 | <a href="#">NM_178347</a>          | <a href="#">52563</a>     | CDC23 (cell division cycle 23      | <a href="#">Cdc23</a>               | 1.238 | 3.818 | 0.00620192 | 0.0480166 |

| 1998 | 10478104 | <a href="#">NM_178271</a>          | <a href="#">22092</a>  | CDC25 (cell division cycle 25, <a href="#">Cdc25</a> | <a href="#">1238</a>               | <a href="#">2006</a> | <a href="#">0.0836233</a> | <a href="#">0.27705</a> |           |
|------|----------|------------------------------------|------------------------|------------------------------------------------------|------------------------------------|----------------------|---------------------------|-------------------------|-----------|
| 1999 | 10365716 | <a href="#">NM_026166</a>          | <a href="#">67454</a>  | RIKEN cDNA 1200009F10 gene                           | <a href="#">I200009F10Rik</a>      | 1.238                | 2.006                     | 0.0836233               | 0.27705   |
| 2000 | 10405216 | <a href="#">NM_011518</a>          | <a href="#">20963</a>  | spleen tyrosine kinase                               | <a href="#">Syk</a>                | 1.238                | 2.158                     | 0.0666629               | 0.241191  |
| 2001 | 10592186 | <a href="#">ENSMUST00000065197</a> | <a href="#">791291</a> | predicted gene, ENSMUSG0000005                       | <a href="#">ENSMUSG00000053016</a> | 1.238                | 2.661                     | 0.0315533               | 0.148594  |
| 2002 | 10574780 | <a href="#">NM_008289</a>          | <a href="#">15484</a>  | hydroxysteroid 11-beta dehydro                       | <a href="#">Hsd11b2</a>            | 1.237                | 4.23                      | 0.00363712              | 0.032683  |
| 2003 | 10487906 | <a href="#">NM_018824</a>          | <a href="#">54338</a>  | solute carrier family 23 (nucl                       | <a href="#">Slc23a2</a>            | 1.237                | 4.412                     | 0.00289399              | 0.0281478 |
| 2004 | 10372528 | <a href="#">NM_021452</a>          | <a href="#">58802</a>  | potassium large conductance ca                       | <a href="#">Kenmb4</a>             | 1.237                | 2.031                     | 0.0805441               | 0.27085   |
| 2005 | 10371616 | <a href="#">NM_144807</a>          | <a href="#">212862</a> | choline phosphotransferase 1                         | <a href="#">Chpt1</a>              | 1.237                | 1.845                     | 0.106306                | 0.321598  |
| 2006 | 10404783 | <a href="#">NM_010104</a>          | <a href="#">13614</a>  | endothelin 1                                         | <a href="#">Edn1</a>               | 1.236                | 3.008                     | 0.0190312               | 0.106061  |
| 2007 | 10536898 | <a href="#">NM_012057</a>          | <a href="#">27056</a>  | interferon regulatory factor 5                       | <a href="#">Irf5</a>               | 1.236                | 4.343                     | 0.00315505              | 0.0297283 |
| 2008 | 10508135 | <a href="#">NM_013718</a>          | <a href="#">27096</a>  | trafficking protein particle c                       | <a href="#">Trappc3</a>            | 1.236                | 2.017                     | 0.0823273               | 0.274433  |
| 2009 | 10555011 | <a href="#">NM_153591</a>          | <a href="#">244141</a> | asparaginyl-tRNA synthetase 2                        | <a href="#">Nars2</a>              | 1.236                | 1.536                     | 0.167116                | 0.418117  |
| 2010 | 10557069 | <a href="#">NM_021554</a>          | <a href="#">59052</a>  | methyltransferase like 9                             | <a href="#">Mettl9</a>             | 1.236                | 3.464                     | 0.0100076               | 0.0680857 |
| 2011 | 10385500 | <a href="#">NM_008326</a>          | <a href="#">15944</a>  | immunity-related GTPase family                       | <a href="#">Irgm</a>               | 1.236                | 1.827                     | 0.109205                | 0.326457  |
| 2012 | 10501629 | <a href="#">NM_001080818</a>       | <a href="#">229776</a> | CDC14 cell division cycle 14 h                       | <a href="#">Cdc14a</a>             | 1.236                | 1.552                     | 0.163428                | 0.412528  |
| 2013 | 10410959 | <a href="#">NM_025770</a>          | <a href="#">66795</a>  | autophagy-related 10 (yeast)                         | <a href="#">Atg10</a>              | 1.235                | 3.076                     | 0.0172605               | 0.0993347 |
| 2014 | 10387821 | <a href="#">NM_007440</a>          | <a href="#">11684</a>  | arachidonate 12-lipoxygenase                         | <a href="#">Alox12</a>             | 1.235                | 1.567                     | 0.15989                 | 0.407256  |
| 2015 | 10422892 | <a href="#">ENSMUST00000110617</a> | <a href="#">73692</a>  | RIKEN cDNA 2410089E03 gene                           | <a href="#">2410089E03Rik</a>      | 1.235                | 4.197                     | 0.00379116              | 0.0336384 |
| 2016 | 10426397 | <a href="#">NM_007727</a>          | <a href="#">12805</a>  | contactin 1                                          | <a href="#">Cntn1</a>              | 1.235                | 3.424                     | 0.0105725               | 0.0705858 |
| 2017 | 10568135 | <a href="#">NM_001102563</a>       | <a href="#">69017</a>  | proline-rich transmembrane pro                       | <a href="#">Prrt2</a>              | 1.235                | 4.473                     | 0.00268441              | 0.0267606 |
| 2018 | 10404885 | <a href="#">NM_025508</a>          | <a href="#">66355</a>  | guanosine monophosphate reduct                       | <a href="#">Gmpr</a>               | 1.234                | 1.807                     | 0.112448                | 0.332128  |
| 2019 | 10511366 | <a href="#">ENSMUST00000116040</a> | <a href="#">622019</a> | similar to protein-tyrosine ph                       | <a href="#">LOC622019</a>          | 1.234                | 2.396                     | 0.04672                 | 0.192001  |
| 2020 | 10607888 | <a href="#">NM_001033330</a>       | <a href="#">333605</a> | FERM and PDZ domain containing                       | <a href="#">Frmppd4</a>            | 1.234                | 2.051                     | 0.0782418               | 0.266143  |
| 2021 | 10482968 | <a href="#">NM_008867</a>          | <a href="#">18779</a>  | phospholipase A2 receptor 1                          | <a href="#">Pla2r1</a>             | 1.234                | 3.987                     | 0.00496521              | 0.0410898 |
| 2022 | 10551822 | <a href="#">NM_001081007</a>       | <a href="#">233060</a> | zinc finger protein 382                              | <a href="#">Zfp382</a>             | 1.234                | 2.932                     | 0.0212244               | 0.114033  |
| 2023 | 10472400 | <a href="#">NM_001099298</a>       | <a href="#">110876</a> | sodium channel, voltage-gated,                       | <a href="#">Scn2a1</a>             | 1.234                | 0.522                     | 0.617186                | 0.823029  |
| 2024 | 10409059 |                                    |                        |                                                      |                                    | 1.234                | 2.378                     | 0.0479858               | 0.195456  |
| 2025 | 10476594 | <a href="#">NM_001013802</a>       | <a href="#">72899</a>  | MACRO domain containing 2                            | <a href="#">MacroD2</a>            | 1.234                | 0.573                     | 0.584056                | 0.801849  |
| 2026 | 10571860 | <a href="#">NM_010402</a>          | <a href="#">15111</a>  | heart and neural crest derivat                       | <a href="#">Hand2</a>              | 1.234                | 3.934                     | 0.00532238              | 0.0431836 |
| 2027 | 10426507 | <a href="#">NM_175251</a>          | <a href="#">77044</a>  | AT rich interactive domain 2 (                       | <a href="#">Arid2</a>              | 1.234                | 3.46                      | 0.0100689               | 0.0683894 |
| 2028 | 10415052 | <a href="#">NM_008608</a>          | <a href="#">17387</a>  | matrix metalloproteinase 14 (me                      | <a href="#">Mmp14</a>              | 1.233                | 2.703                     | 0.0296549               | 0.142408  |
| 2029 | 10355984 | <a href="#">NM_009255</a>          | <a href="#">20720</a>  | serine (or cysteine) peptidase                       | <a href="#">Serpine2</a>           | 1.233                | 2.647                     | 0.0322221               | 0.150731  |
| 2030 | 10466353 |                                    |                        |                                                      |                                    | 1.233                | 3.89                      | 0.00563508              | 0.0450399 |
| 2031 | 10606146 | <a href="#">ENSMUST00000048061</a> | <a href="#">73300</a>  | RIKEN cDNA 1700031F05 gene                           | <a href="#">1700031F05Rik</a>      | 1.233                | 1.777                     | 0.117624                | 0.342098  |
| 2032 | 10404578 | <a href="#">NM_009881</a>          | <a href="#">12593</a>  | chromodomain protein, Y chromo                       | <a href="#">Cdy1</a>               | 1.233                | 2.777                     | 0.0266246               | 0.132645  |
| 2033 | 10539710 | <a href="#">NM_011585</a>          | <a href="#">21841</a>  | cytotoxic granule-associated R                       | <a href="#">Tia1</a>               | 1.233                | 3.425                     | 0.0105596               | 0.0705216 |
| 2034 | 10491629 | <a href="#">BC079623</a>           | <a href="#">229227</a> | RIKEN cDNA 4932438A13 gene                           | <a href="#">4932438A13Rik</a>      | 1.233                | 2.458                     | 0.0425845               | 0.180844  |
| 2035 | 10550039 | <a href="#">NM_153802</a>          | <a href="#">243833</a> | zinc finger protein 128                              | <a href="#">Zfp128</a>             | 1.233                | 3.641                     | 0.00785772              | 0.0572514 |
| 2036 | 10565794 | <a href="#">NM_009825</a>          | <a href="#">12406</a>  | serine (or cysteine) peptidase                       | <a href="#">Serpinh1</a>           | 1.233                | 4.209                     | 0.00373332              | 0.0332773 |
| 2037 | 10408525 | <a href="#">AK006076</a>           | <a href="#">71307</a>  | RIKEN cDNA 1700018A04 gene                           | <a href="#">1700018A04Rik</a>      | 1.233                | 1.175                     | 0.277174                | 0.552231  |
| 2038 | 10349648 | <a href="#">NM_007799</a>          | <a href="#">13034</a>  | cathepsin E                                          | <a href="#">Ctse</a>               | 1.233                | 0.644                     | 0.539223                | 0.772081  |
| 2039 | 10469110 | <a href="#">NM_181399</a>          | <a href="#">98910</a>  | USP6 N-terminal like                                 | <a href="#">Usp6nl</a>             | 1.232                | 2.009                     | 0.0832603               | 0.27641   |
| 2040 | 10375065 | <a href="#">NM_177364</a>          | <a href="#">268396</a> | SH3 and PX domains 2B                                | <a href="#">Sh3pxd2b</a>           | 1.232                | 2.933                     | 0.021194                | 0.114027  |
| 2041 | 10468513 | <a href="#">ENSMUST00000056757</a> | <a href="#">69319</a>  | RIKEN cDNA 1700001K23 gene                           | <a href="#">1700001K23Rik</a>      | 1.232                | 3.242                     | 0.0136348               | 0.084307  |
| 2042 | 10547217 | <a href="#">NM_030165</a>          | <a href="#">78752</a>  | chondroitin sulfate N-acetylga                       | <a href="#">Csgalnact2</a>         | 1.232                | 2.592                     | 0.0349074               | 0.158693  |
| 2043 | 10446351 | <a href="#">NM_001037997</a>       | <a href="#">14158</a>  | fer (fms/fps related) protein                        | <a href="#">Fert2</a>              | 1.232                | 1.944                     | 0.0918141               | 0.293561  |
| 2044 | 10586505 | <a href="#">BC004027</a>           | <a href="#">235439</a> | hect (homologous to the E6-AP                        | <a href="#">Herc1</a>              | 1.232                | 3.527                     | 0.00918554              | 0.0638978 |
| 2045 | 10369761 | <a href="#">NM_178606</a>          | <a href="#">28193</a>  | receptor accessory protein 3                         | <a href="#">Reep3</a>              | 1.231                | 2.795                     | 0.0259087               | 0.130401  |
| 2046 | 10478022 | <a href="#">DQ372939</a>           | <a href="#">70470</a>  | RIKEN cDNA 2610304G08 gene                           | <a href="#">2610304G08Rik</a>      | 1.231                | 3.646                     | 0.00781183              | 0.0570744 |
| 2047 | 10512514 | <a href="#">NM_011602</a>          | <a href="#">21894</a>  | talin 1                                              | <a href="#">Tln1</a>               | 1.231                | 4.448                     | 0.00276729              | 0.0273322 |
| 2048 | 10578796 | <a href="#">BC111102</a>           | <a href="#">270049</a> | RIKEN cDNA 4930431L04 gene                           | <a href="#">4930431L04Rik</a>      | 1.231                | 3.024                     | 0.0185971               | 0.10444   |
| 2049 | 10583450 | <a href="#">NM_172919</a>          | <a href="#">244721</a> | RIKEN cDNA 2210010B09                                | <a href="#">2210010B09Rik</a>      | 1.231                | 1.595                     | 0.153408                | 0.397723  |

|      |          |                                    |                        | gene                           |                               |       |       |            |           |
|------|----------|------------------------------------|------------------------|--------------------------------|-------------------------------|-------|-------|------------|-----------|
| 2050 | 10551185 | <a href="#">NM_011577</a>          | <a href="#">21803</a>  | transforming growth factor, be | <a href="#">Tgfb1</a>         | 1.231 | 2.948 | 0.0207645  | 0.112772  |
| 2051 | 10375145 | <a href="#">NM_010696</a>          | <a href="#">16822</a>  | lymphocyte cytosolic protein 2 | <a href="#">Lcp2</a>          | 1.231 | 2.934 | 0.0211774  | 0.113996  |
| 2052 | 10457054 | <a href="#">NM_146090</a>          | <a href="#">225791</a> | zinc binding alcohol dehydroge | <a href="#">Zadh2</a>         | 1.231 | 2.133 | 0.0691737  | 0.246514  |
| 2053 | 10580550 | <a href="#">NM_173431</a>          | <a href="#">244585</a> | Rpgrip1-like                   | <a href="#">Rpgrip1l</a>      | 1.231 | 3.253 | 0.0134223  | 0.0833783 |
| 2054 | 10520734 | <a href="#">NM_147201</a>          | <a href="#">192292</a> | nuclear receptor binding prote | <a href="#">Nrbp1</a>         | 1.23  | 3.99  | 0.00494428 | 0.0409882 |
| 2055 | 10444890 | <a href="#">NM_133662</a>          | <a href="#">15937</a>  | immediate early response 3     | <a href="#">Ier3</a>          | 1.23  | 2.816 | 0.0251172  | 0.127817  |
| 2056 | 10593316 |                                    |                        |                                |                               | 1.23  | 2.57  | 0.0360668  | 0.162044  |
| 2057 | 10395719 | <a href="#">NM_013780</a>          | <a href="#">27386</a>  | neuronal PAS domain protein 3  | <a href="#">Npas3</a>         | 1.23  | 2.6   | 0.0345109  | 0.157534  |
| 2058 | 10474141 | <a href="#">NM_001077514</a>       | <a href="#">20511</a>  | solute carrier family 1 (glial | <a href="#">Slc1a2</a>        | 1.23  | 3.059 | 0.0176994  | 0.100845  |
| 2059 | 10458875 | <a href="#">NM_026854</a>          | <a href="#">68857</a>  | DTW domain containing 2        | <a href="#">Dtw2</a>          | 1.23  | 4.22  | 0.00368172 | 0.0329997 |
| 2060 | 10356367 | <a href="#">NM_001081082</a>       | <a href="#">76768</a>  | alkaline phosphatase, intestin | <a href="#">Alpi</a>          | 1.23  | 2.477 | 0.041401   | 0.177544  |
| 2061 | 10409666 | <a href="#">NM_175214</a>          | <a href="#">75050</a>  | kinesin family member 27       | <a href="#">Kif27</a>         | 1.229 | 2.097 | 0.0730099  | 0.254739  |
| 2062 | 10551347 | <a href="#">NM_144923</a>          | <a href="#">233016</a> | biliverdin reductase B (flavin | <a href="#">Blvrb</a>         | 1.229 | 2.003 | 0.0840774  | 0.278075  |
| 2063 | 10495945 | <a href="#">BC030185</a>           | <a href="#">71643</a>  | RIKEN cDNA 4930422G04 gene     | <a href="#">4930422G04Rik</a> | 1.229 | 2.669 | 0.0311675  | 0.147467  |
| 2064 | 10413928 | <a href="#">AK007434</a>           | <a href="#">69069</a>  | RIKEN cDNA 1810011H11 gene     | <a href="#">1810011H11Rik</a> | 1.229 | 1.91  | 0.096478   | 0.302302  |
| 2065 | 10411709 | <a href="#">NM_009874</a>          | <a href="#">12572</a>  | cyclin-dependent kinase 7 (hom | <a href="#">Cdk7</a>          | 1.229 | 3.111 | 0.0164336  | 0.0962129 |
| 2066 | 10537298 | <a href="#">NM_203491</a>          | <a href="#">243764</a> | cholinergic receptor, muscarin | <a href="#">Chrm2</a>         | 1.229 | 1.393 | 0.204948   | 0.468376  |
| 2067 | 10513869 | <a href="#">NM_172694</a>          | <a href="#">230316</a> | multiple EGF-like-domains 9    | <a href="#">Mefg9</a>         | 1.229 | 2.133 | 0.069177   | 0.246514  |
| 2068 | 10482109 | <a href="#">NM_026434</a>          | <a href="#">67889</a>  | RNA binding motif protein 18   | <a href="#">Rbm18</a>         | 1.229 | 2.142 | 0.0682626  | 0.24418   |
| 2069 | 10604564 | <a href="#">NM_008150</a>          | <a href="#">14735</a>  | glypican 4                     | <a href="#">Gpc4</a>          | 1.229 | 1.115 | 0.300716   | 0.576877  |
| 2070 | 10451363 | <a href="#">NM_020493</a>          | <a href="#">20807</a>  | serum response factor          | <a href="#">Srf</a>           | 1.228 | 2.75  | 0.0276831  | 0.13614   |
| 2071 | 10504047 | <a href="#">NM_026275</a>          | <a href="#">67615</a>  | ubiquitin-conjugating enzyme E | <a href="#">Ube2r2</a>        | 1.228 | 3.417 | 0.010684   | 0.0711265 |
| 2072 | 10491564 | <a href="#">ENSMUST00000108145</a> | <a href="#">229227</a> | RIKEN cDNA 4932438A13 gene     | <a href="#">4932438A13Rik</a> | 1.228 | 3.113 | 0.0163831  | 0.0961431 |
| 2073 | 10411774 | <a href="#">XR_033506</a>          | <a href="#">638361</a> | similar to 60S ribosomal prote | <a href="#">LOC638361</a>     | 1.228 | 0.966 | 0.36514    | 0.636272  |
| 2074 | 10561128 | <a href="#">NM_028775</a>          | <a href="#">74134</a>  | cytochrome P450, family 2, sub | <a href="#">Cyp2s1</a>        | 1.228 | 2.158 | 0.0666944  | 0.241223  |
| 2075 | 10350146 | <a href="#">NM_013750</a>          | <a href="#">27280</a>  | pleckstrin homology-like domai | <a href="#">Phlda3</a>        | 1.228 | 4.339 | 0.00316812 | 0.0298116 |
| 2076 | 10366163 | <a href="#">NM_175328</a>          | <a href="#">103098</a> | solute carrier family 6 (neuro | <a href="#">Slc6a15</a>       | 1.228 | 1.324 | 0.22607    | 0.496626  |
| 2077 | 10591090 | <a href="#">NM_001080814</a>       | <a href="#">270120</a> | FAT tumor suppressor homolog 3 | <a href="#">Fat3</a>          | 1.228 | 1.989 | 0.0858729  | 0.281198  |
| 2078 | 10472962 | <a href="#">NM_013555</a>          | <a href="#">15438</a>  | homeo box D9                   | <a href="#">Hoxd9</a>         | 1.228 | 1.311 | 0.23014    | 0.501074  |
| 2079 | 10601729 | <a href="#">NM_010078</a>          | <a href="#">13497</a>  | dystrophin related protein 2   | <a href="#">Drp2</a>          | 1.228 | 3.041 | 0.0181588  | 0.102596  |
| 2080 | 10459723 | <a href="#">NM_053255</a>          | <a href="#">114615</a> | elaC homolog 1 (E. coli)       | <a href="#">Elac1</a>         | 1.228 | 3.501 | 0.00950762 | 0.0655458 |
| 2081 | 10595793 | <a href="#">NM_007502</a>          | <a href="#">11933</a>  | ATPase, Na+/K+ transporting, b | <a href="#">Atp1b3</a>        | 1.227 | 2.169 | 0.0656193  | 0.238764  |
| 2082 | 10402096 | <a href="#">ENSMUST00000062957</a> | <a href="#">104718</a> | tetratricopeptide repeat domai | <a href="#">Ttc7b</a>         | 1.227 | 2.796 | 0.0258842  | 0.130308  |
| 2083 | 10552824 | <a href="#">NM_009101</a>          | <a href="#">20130</a>  | Harvey rat sarcoma oncogene, s | <a href="#">Rras</a>          | 1.227 | 2.075 | 0.0754209  | 0.259639  |
| 2084 | 10500876 | <a href="#">NM_001025067</a>       | <a href="#">269473</a> | leucine-rich repeats and immun | <a href="#">Lrig2</a>         | 1.227 | 2.175 | 0.0650198  | 0.237821  |
| 2085 | 10485117 | <a href="#">NM_011957</a>          | <a href="#">26427</a>  | cAMP responsive element bindin | <a href="#">Creb3l1</a>       | 1.227 | 3.289 | 0.0127715  | 0.0803763 |
| 2086 | 10527732 | <a href="#">ENSMUST00000087204</a> | <a href="#">320365</a> | furry homolog (Drosophila)     | <a href="#">Fry</a>           | 1.227 | 3.778 | 0.00653679 | 0.0499508 |
| 2087 | 10471464 | <a href="#">NM_016973</a>          | <a href="#">50935</a>  | ST6 (alpha-N-acetyl-neuraminyl | <a href="#">St6galnac6</a>    | 1.227 | 2.305 | 0.0535231  | 0.209868  |
| 2088 | 10412830 | <a href="#">NM_021504</a>          | <a href="#">59007</a>  | N-glycanase 1                  | <a href="#">Ngly1</a>         | 1.226 | 1.879 | 0.101008   | 0.311148  |
| 2089 | 10560329 | <a href="#">NM_016868</a>          | <a href="#">53417</a>  | hypoxia inducible factor 3, al | <a href="#">Hif3a</a>         | 1.226 | 3.594 | 0.00838058 | 0.0598039 |
| 2090 | 10444658 | <a href="#">NM_033444</a>          | <a href="#">114584</a> | chloride intracellular channel | <a href="#">Clc1</a>          | 1.226 | 2.926 | 0.0214266  | 0.114576  |
| 2091 | 10603700 |                                    |                        |                                |                               | 1.226 | 1.667 | 0.138238   | 0.376165  |
| 2092 | 10484791 | <a href="#">NM_001011860</a>       | <a href="#">258177</a> | olfactory receptor 1222        | <a href="#">Olfr1222</a>      | 1.226 | 3.498 | 0.00954588 | 0.0657453 |
| 2093 | 10576391 | <a href="#">NM_009003</a>          | <a href="#">19341</a>  | RAB4A, member RAS oncogene fam | <a href="#">Rab4a</a>         | 1.226 | 2.603 | 0.0343438  | 0.157     |
| 2094 | 10448117 | <a href="#">NM_008215</a>          | <a href="#">15116</a>  | hyaluronan synthase1           | <a href="#">Has1</a>          | 1.226 | 4.473 | 0.00268321 | 0.0267606 |
| 2095 | 10519855 | <a href="#">NM_001110843</a>       | <a href="#">12293</a>  | calcium channel, voltage-depen | <a href="#">Cacna2d1</a>      | 1.226 | 1.575 | 0.158077   | 0.405065  |
| 2096 | 10417950 | <a href="#">NM_010811</a>          | <a href="#">17423</a>  | N-deacetylase/N-sulfotransfera | <a href="#">Ndst2</a>         | 1.226 | 2.66  | 0.031605   | 0.148733  |
| 2097 | 10491613 | <a href="#">ENSMUST00000057272</a> | <a href="#">229227</a> | RIKEN cDNA 4932438A13 gene     | <a href="#">4932438A13Rik</a> | 1.226 | 2.033 | 0.080307   | 0.270212  |
| 2098 | 10577164 | <a href="#">NM_019521</a>          | <a href="#">14456</a>  | growth arrest specific 6       | <a href="#">Gas6</a>          | 1.225 | 2.512 | 0.0393027  | 0.171999  |
| 2099 | 10347767 | <a href="#">NM_021342</a>          | <a href="#">57814</a>  | potassium voltage-gated channe | <a href="#">Kcne4</a>         | 1.225 | 1.467 | 0.184581   | 0.442145  |
| 2100 | 10533345 | <a href="#">NM_009656</a>          | <a href="#">11669</a>  | aldehyde dehydrogenase 2, mito | <a href="#">Aldh2</a>         | 1.225 | 3.379 | 0.0112658  | 0.0735307 |

|      |          |                                    |                           |                                   |                                    |       |       |            |           |
|------|----------|------------------------------------|---------------------------|-----------------------------------|------------------------------------|-------|-------|------------|-----------|
| 2101 | 10591052 | <a href="#">NM_016928</a>          | <a href="#">10604</a>     | keratin 14                        | <a href="#">Krt14</a>              | 1.225 | 1.951 | 0.0907642  | 0.291305  |
| 2102 | 10554945 | <a href="#">NM_028243</a>          | <a href="#">72461</a>     | prolylcarboxypeptidase (angiot    | <a href="#">Prcp</a>               | 1.225 | 1.957 | 0.0899925  | 0.289452  |
| 2103 | 10428940 | <a href="#">XM_139402</a>          | <a href="#">239502</a>    | predicted gene, EG239502          | <a href="#">EG239502</a>           | 1.225 | 2.21  | 0.0616465  | 0.22936   |
| 2104 | 10546803 | <a href="#">ENSMUST00000101091</a> | <a href="#">100038404</a> | predicted gene,<br>ENSMUSG0000007 | <a href="#">ENSMUSG00000072853</a> | 1.224 | 2.195 | 0.0631044  | 0.232827  |
| 2105 | 10390269 |                                    |                           |                                   |                                    | 1.224 | 1.703 | 0.130996   | 0.363346  |
| 2106 | 10488709 | <a href="#">BC075648</a>           | <a href="#">329540</a>    | RIKEN cDNA 8430427H17<br>gene     | <a href="#">8430427H17Rik</a>      | 1.223 | 3.057 | 0.0177465  | 0.100977  |
| 2107 | 10434105 | <a href="#">NM_153790</a>          | <a href="#">224024</a>    | scavenger receptor class F, me    | <a href="#">Scarf2</a>             | 1.223 | 3.054 | 0.0178191  | 0.101281  |
| 2108 | 10453629 | <a href="#">NM_001081963</a>       | <a href="#">240185</a>    | RIKEN cDNA 9430020K01<br>gene     | <a href="#">9430020K01Rik</a>      | 1.223 | 4.809 | 0.00179169 | 0.0198551 |
| 2109 | 10408882 | <a href="#">NM_019930</a>          | <a href="#">56705</a>     | RAN binding protein 9             | <a href="#">Ranbp9</a>             | 1.223 | 2.282 | 0.0553525  | 0.214629  |
| 2110 | 10359377 | <a href="#">NM_173424</a>          | <a href="#">240869</a>    | zinc finger and BTB domain con    | <a href="#">Zbtb37</a>             | 1.223 | 2.797 | 0.0258264  | 0.130204  |
| 2111 | 10346764 | <a href="#">NM_198127</a>          | <a href="#">329165</a>    | abl-interactor 2                  | <a href="#">Abi2</a>               | 1.223 | 3.547 | 0.00893163 | 0.0626785 |
| 2112 | 10377372 | <a href="#">NM_028048</a>          | <a href="#">71998</a>     | solute carrier family 25, memb    | <a href="#">Slc25a35</a>           | 1.223 | 2.156 | 0.066907   | 0.241599  |
| 2113 | 10407049 | <a href="#">ENSMUST00000095459</a> | <a href="#">70690</a>     | RIKEN cDNA 3830408C21<br>gene     | <a href="#">3830408C21Rik</a>      | 1.223 | 1.819 | 0.11047    | 0.328752  |
| 2114 | 10438064 | <a href="#">NM_016982</a>          | <a href="#">22362</a>     | pre-B lymphocyte gene 1           | <a href="#">Vpreb1</a>             | 1.223 | 1.065 | 0.321301   | 0.598079  |
| 2115 | 10491627 | <a href="#">ENSMUST00000057272</a> | <a href="#">229227</a>    | RIKEN cDNA 4932438A13<br>gene     | <a href="#">4932438A13Rik</a>      | 1.223 | 3.389 | 0.0111021  | 0.0728565 |
| 2116 | 10431738 | <a href="#">NM_001033217</a>       | <a href="#">106042</a>    | prickle like 1 (Drosophila)       | <a href="#">Prickle1</a>           | 1.223 | 3.546 | 0.00893943 | 0.0627124 |
| 2117 | 10449741 | <a href="#">NM_010831</a>          | <a href="#">17691</a>     | SNF1-like kinase                  | <a href="#">Snf1lk</a>             | 1.223 | 3.837 | 0.00604903 | 0.0472133 |
| 2118 | 10472794 | <a href="#">NM_025633</a>          | <a href="#">66559</a>     | methionine aminopeptidase-like    | <a href="#">Metap11</a>            | 1.222 | 2.203 | 0.0623491  | 0.23108   |
| 2119 | 10427428 | <a href="#">NM_145930</a>          | <a href="#">106064</a>    | expressed sequence AW549877       | <a href="#">AW549877</a>           | 1.222 | 3.672 | 0.00754216 | 0.0557411 |
| 2120 | 10522335 | <a href="#">NR_003966</a>          | <a href="#">231287</a>    | ATPase, class V, type 10D         | <a href="#">Atp10d</a>             | 1.222 | 2.464 | 0.0422215  | 0.179868  |
| 2121 | 10542822 | <a href="#">NM_025620</a>          | <a href="#">66532</a>     | RIKEN cDNA 2210417D09<br>gene     | <a href="#">2210417D09Rik</a>      | 1.222 | 4.852 | 0.00170173 | 0.0190821 |
| 2122 | 10571922 | <a href="#">NM_175089</a>          | <a href="#">18004</a>     | NIMA (never in mitosis gene a)    | <a href="#">Nek1</a>               | 1.222 | 1.662 | 0.139219   | 0.377453  |
| 2123 | 10498907 | <a href="#">NM_010298</a>          | <a href="#">14658</a>     | glycine receptor, beta subunit    | <a href="#">Glrb</a>               | 1.222 | 2.424 | 0.0447863  | 0.187184  |
| 2124 | 10459576 | <a href="#">NM_001081073</a>       | <a href="#">225659</a>    | centrosomal protein 76            | <a href="#">Cep76</a>              | 1.222 | 2.804 | 0.0255883  | 0.129436  |
| 2125 | 10418355 | <a href="#">NM_028981</a>          | <a href="#">12289</a>     | calcium channel, voltage-depen    | <a href="#">Cacna1d</a>            | 1.222 | 2.117 | 0.0708458  | 0.249827  |
| 2126 | 10476314 | <a href="#">NM_011170</a>          | <a href="#">19122</a>     | prion protein                     | <a href="#">Prnp</a>               | 1.222 | 1.628 | 0.146363   | 0.3881    |
| 2127 | 10515295 | <a href="#">NM_001042743</a>       | <a href="#">17776</a>     | microtubule associated serine/    | <a href="#">Mast2</a>              | 1.222 | 2.869 | 0.02328    | 0.12121   |
| 2128 | 10457872 | <a href="#">NM_139143</a>          | <a href="#">106957</a>    | solute carrier family 39 (meta    | <a href="#">Slc39a6</a>            | 1.222 | 4.195 | 0.00380156 | 0.0337024 |
| 2129 | 10514221 | <a href="#">NM_007408</a>          | <a href="#">11520</a>     | adipose differentiation relate    | <a href="#">Adfp</a>               | 1.221 | 1.661 | 0.139341   | 0.377524  |
| 2130 | 10386723 | <a href="#">NM_011841</a>          | <a href="#">23939</a>     | mitogen-activated protein kina    | <a href="#">Mapk7</a>              | 1.221 | 4.488 | 0.00263607 | 0.0264031 |
| 2131 | 10503107 | <a href="#">AK018133</a>           | <a href="#">70720</a>     | RIKEN cDNA 6330407A03<br>gene     | <a href="#">6330407A03Rik</a>      | 1.221 | 2.937 | 0.0210892  | 0.113637  |
| 2132 | 10446473 | <a href="#">NM_008480</a>          | <a href="#">16772</a>     | laminin, alpha 1                  | <a href="#">Lama1</a>              | 1.221 | 2.365 | 0.0489374  | 0.198301  |
| 2133 | 10528679 | <a href="#">NM_001081441</a>       | <a href="#">269633</a>    | WD repeat domain 86               | <a href="#">Wdr86</a>              | 1.221 | 3.443 | 0.0103027  | 0.0694203 |
| 2134 | 10354521 | <a href="#">NM_008384</a>          | <a href="#">16329</a>     | inositol polyphosphate-1-phosp    | <a href="#">Inpp1</a>              | 1.221 | 2.562 | 0.0365279  | 0.163494  |
| 2135 | 10494238 | <a href="#">NM_001037737</a>       | <a href="#">11863</a>     | aryl hydrocarbon receptor nucl    | <a href="#">Arnt</a>               | 1.221 | 2.829 | 0.0246556  | 0.126244  |
| 2136 | 10573696 | <a href="#">BC117078</a>           | <a href="#">330820</a>    | RIKEN cDNA 4933402J07 gene        | <a href="#">4933402J07Rik</a>      | 1.221 | 2.811 | 0.0253038  | 0.128426  |
| 2137 | 10408359 | <a href="#">NM_009513</a>          | <a href="#">22360</a>     | neurensin 1                       | <a href="#">Nrsn1</a>              | 1.221 | 2.266 | 0.0567142  | 0.217832  |
| 2138 | 10410332 | <a href="#">NM_001007575</a>       | <a href="#">238693</a>    | zinc finger protein 58            | <a href="#">Zfp58</a>              | 1.221 | 1.639 | 0.143956   | 0.384952  |
| 2139 | 10482880 | <a href="#">NM_001001182</a>       | <a href="#">407823</a>    | bromodomain adjacent to zinc f    | <a href="#">Baz2b</a>              | 1.221 | 4.128 | 0.00413835 | 0.0357732 |
| 2140 | 10419779 | <a href="#">BC011095</a>           | <a href="#">219072</a>    | DNA segment, Chr 14, ERATO<br>Doi | <a href="#">D14Ert500e</a>         | 1.221 | 2.362 | 0.0491427  | 0.19896   |
| 2141 | 10476592 | <a href="#">NM_001013802</a>       | <a href="#">72899</a>     | MACRO domain containing 2         | <a href="#">Macro2</a>             | 1.22  | 1.234 | 0.256      | 0.530431  |
| 2142 | 10425410 | <a href="#">NM_010815</a>          | <a href="#">17444</a>     | GRB2-related adaptor protein 2    | <a href="#">Grap2</a>              | 1.22  | 2.397 | 0.046639   | 0.19193   |
| 2143 | 10584315 |                                    |                           |                                   |                                    | 1.22  | 0.903 | 0.395464   | 0.663311  |
| 2144 | 10473356 | <a href="#">NM_019949</a>          | <a href="#">56791</a>     | ubiquitin-conjugating enzyme E    | <a href="#">Ube2l6</a>             | 1.219 | 3.028 | 0.0184959  | 0.104021  |
| 2145 | 10533304 | <a href="#">NM_172275</a>          | <a href="#">231712</a>    | TRAF type zinc finger domain c    | <a href="#">Trafd1</a>             | 1.219 | 2.759 | 0.0273201  | 0.13484   |
| 2146 | 10473118 | <a href="#">NM_009454</a>          | <a href="#">22193</a>     | ubiquitin-conjugating enzyme E    | <a href="#">Ube2e3</a>             | 1.219 | 2.674 | 0.0309585  | 0.146834  |
| 2147 | 10530163 | <a href="#">NM_011258</a>          | <a href="#">19687</a>     | replication factor C (activato    | <a href="#">Rfc1</a>               | 1.219 | 2.306 | 0.0534257  | 0.209696  |
| 2148 | 10577144 | <a href="#">NM_001024504</a>       | <a href="#">102323</a>    | DCN1, defective in cullin nedd    | <a href="#">Dcun1d2</a>            | 1.219 | 2.608 | 0.0341202  | 0.156257  |
| 2149 | 10495206 | <a href="#">NM_146136</a>          | <a href="#">229699</a>    | solute carrier family 16 (mono    | <a href="#">Slc16a4</a>            | 1.219 | 1.699 | 0.131947   | 0.364978  |
| 2150 | 10538547 | <a href="#">NM_012056</a>          | <a href="#">27055</a>     | FK506 binding protein 9           | <a href="#">Fkbp9</a>              | 1.219 | 2.902 | 0.0221812  | 0.11725   |
| 2151 | 10424383 |                                    |                           |                                   |                                    | 1.218 | 2.819 | 0.025032   | 0.127567  |

|      |          |                                    |                        |                                  |                                    |       |       |            |           |
|------|----------|------------------------------------|------------------------|----------------------------------|------------------------------------|-------|-------|------------|-----------|
| 2152 | 10494351 | <a href="#">NM_181409</a>          | <a href="#">194126</a> | myotubularin related protein 1   | <a href="#">Mtmr11</a>             | 1.218 | 1.911 | 0.0963662  | 0.30213   |
| 2153 | 10389214 | <a href="#">NM_011338</a>          | <a href="#">20308</a>  | chemokine (C-C motif) ligand 9   | <a href="#">Ccl9</a>               | 1.218 | 3.409 | 0.0108016  | 0.0715825 |
| 2154 | 10492165 |                                    |                        |                                  |                                    | 1.218 | 0.678 | 0.519056   | 0.757413  |
| 2155 | 10596072 | <a href="#">BC031532</a>           | <a href="#">235542</a> | RIKEN cDNA 3222402P14 gene       | <a href="#">3222402P14Rik</a>      | 1.218 | 2.165 | 0.0660153  | 0.239751  |
| 2156 | 10398267 | <a href="#">NM_007965</a>          | <a href="#">14026</a>  | Ena-vasodilator stimulated pho   | <a href="#">Evl</a>                | 1.218 | 4.61  | 0.00227262 | 0.0238828 |
| 2157 | 10437055 | <a href="#">NM_011377</a>          | <a href="#">20465</a>  | single-minded homolog 2 (Droso   | <a href="#">Sim2</a>               | 1.218 | 3.082 | 0.017119   | 0.0987437 |
| 2158 | 10381462 | <a href="#">NM_025654</a>          | <a href="#">66599</a>  | RAD52 motif 1                    | <a href="#">Rdm1</a>               | 1.217 | 3.093 | 0.0168558  | 0.0977778 |
| 2159 | 10490802 | <a href="#">NM_173181</a>          | <a href="#">67306</a>  | RIKEN cDNA 3110050N22 gene       | <a href="#">3110050N22Rik</a>      | 1.217 | 2.404 | 0.0461437  | 0.190746  |
| 2160 | 10542740 | <a href="#">NM_010656</a>          | <a href="#">16651</a>  | sarcospan                        | <a href="#">Sspn</a>               | 1.217 | 2.774 | 0.0267088  | 0.132919  |
| 2161 | 10411235 | <a href="#">NM_027711</a>          | <a href="#">544963</a> | IQ motif containing GTPase act   | <a href="#">Iqqap2</a>             | 1.217 | 1.642 | 0.143349   | 0.384029  |
| 2162 | 10494527 | <a href="#">NM_026406</a>          | <a href="#">67845</a>  | zinc finger protein 364          | <a href="#">Zfp364</a>             | 1.217 | 2.248 | 0.0582811  | 0.221755  |
| 2163 | 10425866 | <a href="#">NM_022321</a>          | <a href="#">64099</a>  | parvin, gamma                    | <a href="#">Parvg</a>              | 1.217 | 3.712 | 0.00714399 | 0.0534688 |
| 2164 | 10373594 | <a href="#">NM_015740</a>          | <a href="#">14533</a>  | biogenesis of lysosome-related   | <a href="#">Bloc1s1</a>            | 1.217 | 2.985 | 0.0196606  | 0.108567  |
| 2165 | 10463875 | <a href="#">NM_025696</a>          | <a href="#">66673</a>  | sortilin-related VPS10 domain    | <a href="#">Sorcs3</a>             | 1.217 | 2.161 | 0.0663891  | 0.240653  |
| 2166 | 10415572 | <a href="#">ENSMUST00000095785</a> | <a href="#">69755</a>  | RIKEN cDNA 2410022M11 gene       | <a href="#">2410022M11Rik</a>      | 1.217 | 1.99  | 0.085625   | 0.280865  |
| 2167 | 10428579 | <a href="#">NM_010162</a>          | <a href="#">14042</a>  | exostoses (multiple) 1           | <a href="#">Ext1</a>               | 1.216 | 2.93  | 0.0213108  | 0.114277  |
| 2168 | 10431266 | <a href="#">NM_145475</a>          | <a href="#">223753</a> | ceramide kinase                  | <a href="#">Cerk</a>               | 1.216 | 2.942 | 0.0209286  | 0.113291  |
| 2169 | 10516823 | <a href="#">NM_183428</a>          | <a href="#">269587</a> | erythrocyte protein band 4.1     | <a href="#">Epb4.1</a>             | 1.216 | 2.927 | 0.0213928  | 0.114514  |
| 2170 | 10392464 | <a href="#">BC029169</a>           | <a href="#">208659</a> | cDNA sequence BC029169           | <a href="#">BC029169</a>           | 1.216 | 2.673 | 0.0309778  | 0.146884  |
| 2171 | 10577948 | <a href="#">NM_025686</a>          | <a href="#">66653</a>  | BRF2, subunit of RNA polymeras   | <a href="#">Brf2</a>               | 1.216 | 2.814 | 0.0252072  | 0.128059  |
| 2172 | 10462102 | <a href="#">ENSMUST00000099560</a> | <a href="#">72351</a>  | protein prenyltransferase alph   | <a href="#">Ptar1</a>              | 1.216 | 1.819 | 0.110434   | 0.328752  |
| 2173 | 10371846 | <a href="#">NM_001042558</a>       | <a href="#">11783</a>  | apoptotic peptidase activating   | <a href="#">Apaf1</a>              | 1.216 | 3.361 | 0.0115469  | 0.0749149 |
| 2174 | 10444589 |                                    |                        |                                  |                                    | 1.216 | 2.01  | 0.083202   | 0.27639   |
| 2175 | 10532741 | <a href="#">NM_146162</a>          | <a href="#">231633</a> | transmembrane protein 119        | <a href="#">Tmem119</a>            | 1.216 | 2.268 | 0.0565711  | 0.21744   |
| 2176 | 10422240 | <a href="#">NM_199065</a>          | <a href="#">76965</a>  | SLIT and NTRK-like family, mem   | <a href="#">Slitrk1</a>            | 1.216 | 2.303 | 0.0536515  | 0.210153  |
| 2177 | 10424559 | <a href="#">NM_010158</a>          | <a href="#">13992</a>  | KH domain containing, RNA bind   | <a href="#">Khdrbs3</a>            | 1.216 | 1.419 | 0.197768   | 0.458459  |
| 2178 | 10461051 | <a href="#">AK134852</a>           | <a href="#">70494</a>  | RIKEN cDNA 5730409K12 gene       | <a href="#">5730409K12Rik</a>      | 1.216 | 2.487 | 0.0407952  | 0.176072  |
| 2179 | 10596207 | <a href="#">NM_025692</a>          | <a href="#">66663</a>  | ubiquitin-like modifier activa   | <a href="#">Uba5</a>               | 1.215 | 2.234 | 0.0594713  | 0.224707  |
| 2180 | 10555009 |                                    |                        |                                  |                                    | 1.215 | 1.584 | 0.155874   | 0.40178   |
| 2181 | 10538590 | <a href="#">ENSMUST00000031817</a> | <a href="#">67138</a>  | hect domain and RLD 5            | <a href="#">Herc5</a>              | 1.215 | 1.772 | 0.118389   | 0.343378  |
| 2182 | 10424905 | <a href="#">NM_198885</a>          | <a href="#">20289</a>  | scleraxis                        | <a href="#">Scx</a>                | 1.215 | 1.269 | 0.243748   | 0.516777  |
| 2183 | 10452854 | <a href="#">NM_053188</a>          | <a href="#">94224</a>  | steroid 5 alpha-reductase 2      | <a href="#">Srd5a2</a>             | 1.215 | 1.976 | 0.0875481  | 0.284787  |
| 2184 | 10407766 | <a href="#">NM_018886</a>          | <a href="#">56048</a>  | lectin, galactose binding, sol   | <a href="#">Lgals8</a>             | 1.215 | 3.464 | 0.0100115  | 0.0680872 |
| 2185 | 10490903 | <a href="#">NM_024495</a>          | <a href="#">71934</a>  | carbonic anhydrase 13            | <a href="#">Car13</a>              | 1.215 | 1.484 | 0.180265   | 0.435801  |
| 2186 | 10588454 | <a href="#">NM_029896</a>          | <a href="#">77305</a>  | WD repeat domain containing 82   | <a href="#">Wdr82</a>              | 1.215 | 2.059 | 0.0773164  | 0.263972  |
| 2187 | 10559221 | <a href="#">NM_011620</a>          | <a href="#">21957</a>  | troponin T3, skeletal, fast      | <a href="#">Tnnt3</a>              | 1.214 | 3.533 | 0.00911051 | 0.0635122 |
| 2188 | 10565727 | <a href="#">NM_001024619</a>       | <a href="#">244152</a> | tsukushin                        | <a href="#">Tsku</a>               | 1.214 | 2.669 | 0.0311755  | 0.147467  |
| 2189 | 10593937 | <a href="#">NM_025837</a>          | <a href="#">110119</a> | mannose phosphate isomerase      | <a href="#">Mpi</a>                | 1.214 | 3.897 | 0.00558476 | 0.044769  |
| 2190 | 10495035 | <a href="#">NM_009196</a>          | <a href="#">20501</a>  | solute carrier family 16 (mono   | <a href="#">Slc16a1</a>            | 1.214 | 2.594 | 0.0348228  | 0.158377  |
| 2191 | 10553080 | <a href="#">NM_009800</a>          | <a href="#">12348</a>  | carbonic anhydrase 11            | <a href="#">Car11</a>              | 1.214 | 2.142 | 0.0682451  | 0.244165  |
| 2192 | 10435329 | <a href="#">NM_172824</a>          | <a href="#">239839</a> | coiled-coil domain containing    | <a href="#">Cedc14</a>             | 1.214 | 3.02  | 0.0187122  | 0.104947  |
| 2193 | 10403929 | <a href="#">NM_001039115</a>       | <a href="#">544922</a> | predicted gene, OTTMUSG000000000 | <a href="#">OTTMUSG00000000421</a> | 1.214 | 2.075 | 0.075445   | 0.259643  |
| 2194 | 10379936 | <a href="#">NM_009324</a>          | <a href="#">21385</a>  | T-box 2                          | <a href="#">Tbx2</a>               | 1.214 | 2.731 | 0.0284637  | 0.13848   |
| 2195 | 10551169 | <a href="#">NM_146184</a>          | <a href="#">232984</a> | UDP-GlcNAc:betaGal beta-1,3-N-   | <a href="#">B3gnt8</a>             | 1.213 | 1.486 | 0.17963    | 0.434993  |
| 2196 | 10546104 | <a href="#">NM_023060</a>          | <a href="#">65967</a>  | eukaryotic elongation factor,    | <a href="#">Eefsec</a>             | 1.213 | 3.408 | 0.0108093  | 0.0715825 |
| 2197 | 10422912 | <a href="#">BC058107</a>           | <a href="#">73692</a>  | RIKEN cDNA 2410089E03 gene       | <a href="#">2410089E03Rik</a>      | 1.213 | 3.584 | 0.00848876 | 0.0604128 |
| 2198 | 10455098 | <a href="#">NM_053139</a>          | <a href="#">93885</a>  | protocadherin beta 14            | <a href="#">Pcdhb14</a>            | 1.213 | 1.333 | 0.223172   | 0.493026  |
| 2199 | 10363773 | <a href="#">NM_001081347</a>       | <a href="#">69288</a>  | Rho-related BTB domain contain   | <a href="#">Rhobtb1</a>            | 1.213 | 1.715 | 0.128882   | 0.360128  |
| 2200 | 10356271 | <a href="#">NM_213615</a>          | <a href="#">381287</a> | RIKEN cDNA A530032D15Rik gene    | <a href="#">A530032D15Rik</a>      | 1.213 | 2.399 | 0.0464864  | 0.191643  |

|      |          |                                    |                           |                                |                                    |       |       |            |           |
|------|----------|------------------------------------|---------------------------|--------------------------------|------------------------------------|-------|-------|------------|-----------|
| 2201 | 10369276 | <a href="#">NM_001033259</a>       | <a href="#">215999</a>    | coiled-coil domain containing  | <a href="#">Ccdc109a</a>           | 1.212 | 1.852 | 0.105183   | 0.319429  |
| 2202 | 10546056 | <a href="#">NM_001039394</a>       | <a href="#">69834</a>     | RAB43, member RAS oncogene fam | <a href="#">Rab43</a>              | 1.212 | 3.067 | 0.0174754  | 0.0999956 |
| 2203 | 10426089 | <a href="#">NM_027306</a>          | <a href="#">70073</a>     | zinc finger, DHHC domain conta | <a href="#">Zdhhc25</a>            | 1.212 | 1.396 | 0.204243   | 0.467434  |
| 2204 | 10409866 | <a href="#">ENSMUST00000021884</a> | <a href="#">13025</a>     | cytotoxic T lymphocyte-associa | <a href="#">Ctla2b</a>             | 1.212 | 1.973 | 0.0878545  | 0.285438  |
| 2205 | 10426955 | <a href="#">NM_001077499</a>       | <a href="#">20273</a>     | sodium channel, voltage-gated, | <a href="#">Scn8a</a>              | 1.212 | 2.535 | 0.0380199  | 0.168377  |
| 2206 | 10384032 | <a href="#">NM_008894</a>          | <a href="#">18972</a>     | polymerase (DNA directed), del | <a href="#">Pold2</a>              | 1.212 | 2.206 | 0.0620483  | 0.230288  |
| 2207 | 10577219 | <a href="#">ENSMUST00000071308</a> | <a href="#">100044283</a> | hypothetical protein LOC100044 | <a href="#">LOC100044283</a>       | 1.212 | 2.382 | 0.047744   | 0.194809  |
| 2208 | 10478949 | <a href="#">NM_029761</a>          | <a href="#">76829</a>     | docking protein 5              | <a href="#">Dok5</a>               | 1.212 | 1.586 | 0.155462   | 0.400991  |
| 2209 | 10498519 | <a href="#">NM_026155</a>          | <a href="#">67437</a>     | signal sequence receptor, gamm | <a href="#">Ssr3</a>               | 1.211 | 3.489 | 0.00967209 | 0.0664414 |
| 2210 | 10543273 | <a href="#">NM_080285</a>          | <a href="#">30785</a>     | cortactin binding protein 2    | <a href="#">Cttnbp2</a>            | 1.211 | 1.227 | 0.258212   | 0.532284  |
| 2211 | 10544538 |                                    |                           |                                |                                    | 1.211 | 1.634 | 0.144921   | 0.386407  |
| 2212 | 10546807 |                                    |                           |                                |                                    | 1.211 | 2.957 | 0.0204786  | 0.111886  |
| 2213 | 10373313 | <a href="#">NM_008668</a>          | <a href="#">17937</a>     | Ngfi-A binding protein 2       | <a href="#">Nab2</a>               | 1.211 | 2.729 | 0.0285676  | 0.138731  |
| 2214 | 10430519 | <a href="#">NM_013767</a>          | <a href="#">27373</a>     | casein kinase 1, epsilon       | <a href="#">Csnk1e</a>             | 1.211 | 2.278 | 0.0557439  | 0.215593  |
| 2215 | 10358523 | <a href="#">NM_001024720</a>       | <a href="#">545370</a>    | hemiceitin 1                   | <a href="#">Hmcn1</a>              | 1.211 | 2.666 | 0.0312985  | 0.147889  |
| 2216 | 10573779 | <a href="#">NM_027280</a>          | <a href="#">93960</a>     | naked cuticle 1 homolog (Droso | <a href="#">Nkd1</a>               | 1.211 | 2.419 | 0.0451694  | 0.187967  |
| 2217 | 10586993 | <a href="#">NM_028116</a>          | <a href="#">72135</a>     | pygopus 1                      | <a href="#">Pygo1</a>              | 1.211 | 3.359 | 0.0115855  | 0.0750731 |
| 2218 | 10354031 | <a href="#">NM_207228</a>          | <a href="#">211484</a>    | testis specific 10             | <a href="#">Tsga10</a>             | 1.211 | 1.972 | 0.0879711  | 0.28568   |
| 2219 | 10476740 | <a href="#">NM_053195</a>          | <a href="#">94249</a>     | solute carrier family 24 (sodi | <a href="#">Slc24a3</a>            | 1.21  | 2.413 | 0.0455343  | 0.18878   |
| 2220 | 10441064 | <a href="#">NM_007834</a>          | <a href="#">13185</a>     | Down syndrome critical region  | <a href="#">Dscr3</a>              | 1.21  | 0.96  | 0.368181   | 0.639095  |
| 2221 | 10602068 | <a href="#">NM_011845</a>          | <a href="#">23947</a>     | midline 2                      | <a href="#">Mid2</a>               | 1.21  | 1.292 | 0.236318   | 0.508399  |
| 2222 | 10582445 | <a href="#">NM_001081379</a>       | <a href="#">77087</a>     | ankyrin repeat domain 11       | <a href="#">Ankrd11</a>            | 1.21  | 3.565 | 0.00870985 | 0.0615101 |
| 2223 | 10437210 | <a href="#">NM_019517</a>          | <a href="#">56175</a>     | beta-site APP-cleaving enzyme  | <a href="#">Bace2</a>              | 1.21  | 2.789 | 0.026151   | 0.130966  |
| 2224 | 10425138 | <a href="#">NM_009164</a>          | <a href="#">20401</a>     | SH3-domain binding protein 1   | <a href="#">Sh3bp1</a>             | 1.21  | 3.148 | 0.0155899  | 0.0928023 |
| 2225 | 10410590 | <a href="#">NM_177333</a>          | <a href="#">211446</a>    | exocyst complex component 3    | <a href="#">Exoc3</a>              | 1.21  | 2.902 | 0.0221906  | 0.11727   |
| 2226 | 10426557 | <a href="#">NM_021514</a>          | <a href="#">18642</a>     | phosphofructokinase, muscle    | <a href="#">Pfkfb3</a>             | 1.21  | 2.334 | 0.0512906  | 0.204543  |
| 2227 | 10604944 | <a href="#">NM_017369</a>          | <a href="#">14404</a>     | gamma-aminobutyric acid (GABA- | <a href="#">Gabre</a>              | 1.21  | 2.034 | 0.0802974  | 0.270212  |
| 2228 | 10348632 | <a href="#">NM_007855</a>          | <a href="#">13345</a>     | twist homolog 2 (Drosophila)   | <a href="#">Twist2</a>             | 1.21  | 2.339 | 0.0508656  | 0.203346  |
| 2229 | 10465619 | <a href="#">NM_201411</a>          | <a href="#">396184</a>    | fibronectin leucine rich trans | <a href="#">Flrt1</a>              | 1.209 | 3.185 | 0.0147904  | 0.0892997 |
| 2230 | 10394560 | <a href="#">NM_025695</a>          | <a href="#">67241</a>     | structural maintenance of chro | <a href="#">Smc6</a>               | 1.209 | 3.504 | 0.00947477 | 0.065362  |
| 2231 | 10391685 | <a href="#">NM_199200</a>          | <a href="#">217219</a>    | cDNA sequence BC025575         | <a href="#">BC025575</a>           | 1.209 | 4.112 | 0.00422354 | 0.0362724 |
| 2232 | 10589790 |                                    |                           |                                |                                    | 1.209 | 0.968 | 0.364399   | 0.635557  |
| 2233 | 10415875 | <a href="#">NM_028228</a>          | <a href="#">72400</a>     | RIKEN cDNA 2610028A01 gene     | <a href="#">2610028A01Rik</a>      | 1.209 | 2.376 | 0.0481443  | 0.195916  |
| 2234 | 10441422 | <a href="#">NM_146073</a>          | <a href="#">224454</a>    | zinc finger, DHHC domain conta | <a href="#">Zdhhc14</a>            | 1.208 | 2.956 | 0.0205055  | 0.111975  |
| 2235 | 10446063 | <a href="#">NM_025566</a>          | <a href="#">66443</a>     | tumor necrosis factor, alpha-i | <a href="#">Tnfaip8l1</a>          | 1.208 | 3.536 | 0.00906268 | 0.0632413 |
| 2236 | 10593713 | <a href="#">NM_019686</a>          | <a href="#">56506</a>     | calcium and integrin binding f | <a href="#">Cib2</a>               | 1.208 | 2.53  | 0.0383069  | 0.169165  |
| 2237 | 10430794 | <a href="#">NM_013872</a>          | <a href="#">29858</a>     | phosphomannomutase 1           | <a href="#">Pmm1</a>               | 1.208 | 3.612 | 0.00817847 | 0.0588182 |
| 2238 | 10425623 | <a href="#">NM_145473</a>          | <a href="#">105859</a>    | cold shock domain containing C | <a href="#">Csde2</a>              | 1.208 | 1.92  | 0.0950697  | 0.299747  |
| 2239 | 10560655 | <a href="#">NM_020486</a>          | <a href="#">57278</a>     | basal cell adhesion molecule   | <a href="#">Bcam</a>               | 1.208 | 2.567 | 0.0362281  | 0.162503  |
| 2240 | 10578880 | <a href="#">NM_009390</a>          | <a href="#">21892</a>     | tolloid-like                   | <a href="#">Tll1</a>               | 1.208 | 2.526 | 0.038521   | 0.16972   |
| 2241 | 10509568 | <a href="#">NM_025451</a>          | <a href="#">66259</a>     | calcium/calmodulin-dependent p | <a href="#">Camk2n1</a>            | 1.208 | 3.458 | 0.0100959  | 0.0685504 |
| 2242 | 10471129 | <a href="#">NM_019681</a>          | <a href="#">14299</a>     | frequenin homolog (Drosophila) | <a href="#">Freq</a>               | 1.208 | 2.485 | 0.0409261  | 0.176312  |
| 2243 | 10606248 | <a href="#">NM_053206</a>          | <a href="#">272790</a>    | melanoma antigen, family E, 2  | <a href="#">Magee2</a>             | 1.208 | 2.536 | 0.0379308  | 0.168193  |
| 2244 | 10546402 | <a href="#">NM_030081</a>          | <a href="#">78287</a>     | zinc finger, FYVE domain conta | <a href="#">Zfyve20</a>            | 1.208 | 1.65  | 0.141744   | 0.381301  |
| 2245 | 10568601 | <a href="#">BC002195</a>           | <a href="#">791302</a>    | predicted gene, ENSMUSG0000005 | <a href="#">ENSMUSG00000057032</a> | 1.208 | 0.994 | 0.35233    | 0.625287  |
| 2246 | 10348653 | <a href="#">NM_016696</a>          | <a href="#">14733</a>     | glypican 1                     | <a href="#">Gpc1</a>               | 1.208 | 2.773 | 0.0267814  | 0.133145  |
| 2247 | 10347417 | <a href="#">NM_025784</a>          | <a href="#">66821</a>     | BCS1-like (yeast)              | <a href="#">Bcs1l</a>              | 1.207 | 1.996 | 0.0849587  | 0.279982  |
| 2248 | 10396778 | <a href="#">NM_019579</a>          | <a href="#">56217</a>     | membrane protein, palmitoylate | <a href="#">Mpp5</a>               | 1.207 | 3.65  | 0.00776364 | 0.0567966 |
| 2249 | 10571297 | <a href="#">ENSMUST00000067768</a> | <a href="#">791287</a>    | predicted gene, ENSMUSG0000005 | <a href="#">ENSMUSG00000054618</a> | 1.207 | 1.619 | 0.148292   | 0.390488  |
| 2250 | 10563858 | <a href="#">NM_008074</a>          | <a href="#">14407</a>     | gamma-aminobutyric acid (GABA- | <a href="#">Gabrg3</a>             | 1.207 | 2.131 | 0.0693731  | 0.246733  |
| 2251 | 10598547 |                                    |                           |                                |                                    | 1.207 | 2.719 | 0.0289841  | 0.140013  |
| 2252 | 10491625 | <a href="#">ENSMUST00000057272</a> | <a href="#">229227</a>    | RIKEN cDNA 4932438A13 gene     | <a href="#">4932438A13Rik</a>      | 1.207 | 2.65  | 0.0320858  | 0.150244  |

|      |          |                                    |                           | Gene                           |                                    |       |       |            |           |
|------|----------|------------------------------------|---------------------------|--------------------------------|------------------------------------|-------|-------|------------|-----------|
| 2253 | 10599120 | <a href="#">NM_001009947</a>       | <a href="#">75974</a>     | dedicator of cytokinesis 11    | <a href="#">Dock11</a>             | 1.207 | 2.213 | 0.0613754  | 0.228633  |
| 2254 | 10361098 | <a href="#">NM_025424</a>          | <a href="#">66208</a>     | neuron derived neurotrophic fa | <a href="#">Nenf</a>               | 1.207 | 1.24  | 0.253941   | 0.528218  |
| 2255 | 10473367 | <a href="#">NM_001081349</a>       | <a href="#">72401</a>     | solute carrier family 43, memb | <a href="#">Slc43a1</a>            | 1.206 | 3.442 | 0.01032    | 0.0695148 |
| 2256 | 10487675 | <a href="#">ENSMUST00000079964</a> | <a href="#">321014</a>    | RIKEN cDNA 4930473A02 gene     | <a href="#">4930473A02Rik</a>      | 1.206 | 3.55  | 0.00889197 | 0.0624416 |
| 2257 | 10449419 | <a href="#">NM_011566</a>          | <a href="#">21678</a>     | TEA domain family member 3     | <a href="#">Tead3</a>              | 1.206 | 1.849 | 0.105644   | 0.320213  |
| 2258 | 10491056 | <a href="#">NM_030732</a>          | <a href="#">81004</a>     | transducin (beta)-like 1X-link | <a href="#">Tb11xr1</a>            | 1.206 | 2.691 | 0.0301925  | 0.144432  |
| 2259 | 10545629 | <a href="#">NM_019752</a>          | <a href="#">64704</a>     | HtrA serine peptidase 2        | <a href="#">Htra2</a>              | 1.206 | 2.22  | 0.0608115  | 0.227575  |
| 2260 | 10574378 | <a href="#">NM_030198</a>          | <a href="#">78833</a>     | GINS complex subunit 3 (Psf3 h | <a href="#">Gins3</a>              | 1.205 | 3.247 | 0.0135494  | 0.0839157 |
| 2261 | 10554521 | <a href="#">NM_008803</a>          | <a href="#">18584</a>     | phosphodiesterase 8A           | <a href="#">Pde8a</a>              | 1.205 | 1.609 | 0.150429   | 0.393664  |
| 2262 | 10556658 | <a href="#">BC054720</a>           | <a href="#">71517</a>     | RIKEN cDNA 9030624J02 gene     | <a href="#">9030624J02Rik</a>      | 1.205 | 1.939 | 0.0924301  | 0.294684  |
| 2263 | 10542120 | <a href="#">NM_020257</a>          | <a href="#">93675</a>     | C-type lectin domain family 2, | <a href="#">Clec2i</a>             | 1.205 | 3.018 | 0.0187695  | 0.105129  |
| 2264 | 10550956 | <a href="#">NM_023154</a>          | <a href="#">66071</a>     | ethylmalonic encephalopathy 1  | <a href="#">Ethe1</a>              | 1.205 | 1.317 | 0.22824    | 0.499214  |
| 2265 | 10599719 | <a href="#">NM_172780</a>          | <a href="#">236794</a>    | solute carrier family 9 (sodiu | <a href="#">Slc9a6</a>             | 1.205 | 1.539 | 0.166398   | 0.417266  |
| 2266 | 10594221 | <a href="#">NM_145616</a>          | <a href="#">102747</a>    | leucine rich repeat containing | <a href="#">Lrrc49</a>             | 1.205 | 1.957 | 0.090009   | 0.289452  |
| 2267 | 10358057 | <a href="#">NM_175259</a>          | <a href="#">77552</a>     | shisa homolog 4 (Xenopus laevi | <a href="#">Shisa4</a>             | 1.205 | 2.102 | 0.0724769  | 0.253591  |
| 2268 | 10474223 | <a href="#">NM_181858</a>          | <a href="#">333883</a>    | CD59b antigen                  | <a href="#">Cd59b</a>              | 1.205 | 1.921 | 0.0949897  | 0.299665  |
| 2269 | 10558450 | <a href="#">ENSMUST00000097978</a> | <a href="#">100038555</a> | predicted gene, ENSMUSG0000007 | <a href="#">ENSMUSG00000073800</a> | 1.205 | 3.098 | 0.0167412  | 0.0974333 |
| 2270 | 10450519 | <a href="#">NM_025674</a>          | <a href="#">106795</a>    | transcription factor 19        | <a href="#">Tcf19</a>              | 1.205 | 2.755 | 0.0274599  | 0.135341  |
| 2271 | 10591576 | <a href="#">NM_177030</a>          | <a href="#">319899</a>    | dedicator of cytokinesis 6     | <a href="#">Dock6</a>              | 1.205 | 3.184 | 0.0148126  | 0.0893521 |
| 2272 | 10603135 | <a href="#">NM_175027</a>          | <a href="#">237211</a>    | Fanconi anemia, complementatio | <a href="#">Faneb</a>              | 1.204 | 1.633 | 0.145235   | 0.386933  |
| 2273 | 10357856 |                                    |                           |                                |                                    | 1.204 | 1.592 | 0.154152   | 0.398898  |
| 2274 | 10452860 | <a href="#">NM_133771</a>          | <a href="#">76890</a>     | mediator of cell motility 1    | <a href="#">Memo1</a>              | 1.204 | 1.796 | 0.114252   | 0.335566  |
| 2275 | 10381744 | <a href="#">NM_007477</a>          | <a href="#">11841</a>     | ADP-ribosylation factor 2      | <a href="#">Arf2</a>               | 1.204 | 2.904 | 0.0221052  | 0.117082  |
| 2276 | 10491699 | <a href="#">NM_008006</a>          | <a href="#">14173</a>     | fibroblast growth factor 2     | <a href="#">Fgf2</a>               | 1.204 | 1.665 | 0.13865    | 0.376676  |
| 2277 | 10504849 | <a href="#">NM_026343</a>          | <a href="#">67727</a>     | syntaxin 17                    | <a href="#">Stx17</a>              | 1.204 | 3.511 | 0.00938616 | 0.0648777 |
| 2278 | 10566512 |                                    |                           |                                |                                    | 1.204 | 1.436 | 0.192821   | 0.452269  |
| 2279 | 10386789 | <a href="#">NM_013881</a>          | <a href="#">29869</a>     | Unc-51 like kinase 2 (C. elega | <a href="#">Ulk2</a>               | 1.204 | 2.621 | 0.033448   | 0.154315  |
| 2280 | 10402665 | <a href="#">NM_183016</a>          | <a href="#">217866</a>    | Cdc42 binding protein kinase b | <a href="#">Cdc42bpb</a>           | 1.203 | 2.484 | 0.0410192  | 0.176569  |
| 2281 | 10544788 | <a href="#">NM_010456</a>          | <a href="#">15405</a>     | homeo box A9                   | <a href="#">Hoxa9</a>              | 1.203 | 2.337 | 0.051036   | 0.203797  |
| 2282 | 10426999 | <a href="#">NM_009612</a>          | <a href="#">11482</a>     | activin A receptor, type II-li | <a href="#">Acvr1l</a>             | 1.203 | 3.512 | 0.00937129 | 0.0648149 |
| 2283 | 10418092 | <a href="#">ENSMUST00000096098</a> | <a href="#">268723</a>    | RIKEN cDNA A830039N20 gene     | <a href="#">A830039N20Rik</a>      | 1.203 | 1.135 | 0.292539   | 0.568731  |
| 2284 | 10583242 | <a href="#">NM_030261</a>          | <a href="#">75747</a>     | sestrin 3                      | <a href="#">Sesn3</a>              | 1.203 | 3.726 | 0.0070061  | 0.0526242 |
| 2285 | 10417065 | <a href="#">NM_029519</a>          | <a href="#">76108</a>     | RAS related protein 2a         | <a href="#">Rap2a</a>              | 1.203 | 2.041 | 0.0794198  | 0.26838   |
| 2286 | 10447517 | <a href="#">NR_003519</a>          | <a href="#">328734</a>    | RIKEN cDNA D030013I16 gene     | <a href="#">D030013I16Rik</a>      | 1.203 | 1.468 | 0.184423   | 0.442014  |
| 2287 | 10414802 | <a href="#">ENSMUST00000103606</a> | <a href="#">547329</a>    | T cell receptor alpha variable | <a href="#">Trav16d/dv11</a>       | 1.203 | 0.906 | 0.394032   | 0.661801  |
| 2288 | 10505894 | <a href="#">NM_024433</a>          | <a href="#">66902</a>     | methylthioadenosine phosphoryl | <a href="#">Mtap</a>               | 1.203 | 2.431 | 0.0443358  | 0.185852  |
| 2289 | 10581434 | <a href="#">NM_176913</a>          | <a href="#">319446</a>    | dipeptidase 2                  | <a href="#">Dpep2</a>              | 1.203 | 3.147 | 0.0156126  | 0.0928214 |
| 2290 | 10574727 | <a href="#">NM_001081332</a>       | <a href="#">277973</a>    | solute carrier family 9 (sodiu | <a href="#">Slc9a5</a>             | 1.203 | 1.523 | 0.170293   | 0.421871  |
| 2291 | 10482824 | <a href="#">NM_001110204</a>       | <a href="#">11477</a>     | activin A receptor, type 1     | <a href="#">Acvr1</a>              | 1.202 | 3.012 | 0.0189199  | 0.105608  |
| 2292 | 10445192 | <a href="#">NM_011269</a>          | <a href="#">19743</a>     | Rhesus blood group-associated  | <a href="#">Rhag</a>               | 1.202 | 0.581 | 0.578804   | 0.798528  |
| 2293 | 10517169 | <a href="#">NM_080559</a>          | <a href="#">73723</a>     | SH3 domain binding glutamic ac | <a href="#">Sh3bgrl3</a>           | 1.202 | 2.531 | 0.0382192  | 0.168945  |
| 2294 | 10367746 | <a href="#">NM_175155</a>          | <a href="#">70097</a>     | SAM and SH3 domain containing  | <a href="#">Sash1</a>              | 1.202 | 1.976 | 0.0875214  | 0.284744  |
| 2295 | 10483215 | <a href="#">NM_018732</a>          | <a href="#">20269</a>     | sodium channel, voltage-gated, | <a href="#">Scn3a</a>              | 1.202 | 1.961 | 0.0895225  | 0.28881   |
| 2296 | 10352548 | <a href="#">NM_001033286</a>       | <a href="#">226781</a>    | solute carrier family 30, memb | <a href="#">Slc30a10</a>           | 1.202 | 3.652 | 0.00773911 | 0.0567392 |
| 2297 | 10347921 | <a href="#">BC100303</a>           | <a href="#">621875</a>    | RIKEN cDNA A530040E14 gene     | <a href="#">A530040E14Rik</a>      | 1.202 | 2.502 | 0.0399245  | 0.173732  |
| 2298 | 10596269 | <a href="#">ENSMUST00000060084</a> | <a href="#">235567</a>    | DnaJ (Hsp40) homolog, subfamil | <a href="#">Dnajc13</a>            | 1.202 | 1.14  | 0.290758   | 0.567035  |
| 2299 | 10498273 | <a href="#">NM_008536</a>          | <a href="#">17112</a>     | transmembrane 4 superfamily me | <a href="#">Tm4sf1</a>             | 1.202 | 2.576 | 0.0357506  | 0.161141  |
| 2300 | 10438220 | <a href="#">NM_030558</a>          | <a href="#">80733</a>     | carbonic anhydrase 15          | <a href="#">Car15</a>              | 1.202 | 3.247 | 0.013539   | 0.0838762 |
| 2301 | 10380303 | <a href="#">NM_028296</a>          | <a href="#">72605</a>     | carbonic anhydrase 10          | <a href="#">Car10</a>              | 1.202 | 1.699 | 0.131798   | 0.364709  |
| 2302 | 10534456 | <a href="#">NM_146001</a>          | <a href="#">215114</a>    | huntingtin interacting protein | <a href="#">Hipl</a>               | 1.202 | 3.354 | 0.0116608  | 0.075402  |
| 2303 | 10555881 | <a href="#">NM_146312</a>          | <a href="#">258309</a>    | olfactory receptor 657         | <a href="#">Olfr657</a>            | 1.202 | 2.444 | 0.0434997  | 0.183402  |
| 2304 | 10450496 | <a href="#">NM_010734</a>          | <a href="#">16988</a>     | leukocyte specific transcript  | <a href="#">Lst1</a>               | 1.201 | 2.254 | 0.0577638  | 0.220422  |

|      |          |                                    |                           |                                |                                    |       |       |            |           |
|------|----------|------------------------------------|---------------------------|--------------------------------|------------------------------------|-------|-------|------------|-----------|
| 2305 | 10434845 | <a href="#">NM_008364</a>          | <a href="#">16180</a>     | interleukin 1 receptor accesso | <a href="#">Il1rap</a>             | 1.201 | 2.031 | 0.0806091  | 0.270969  |
| 2306 | 10402063 | <a href="#">BC029185</a>           | <a href="#">71375</a>     | forkhead box N3                | <a href="#">Foxn3</a>              | 1.201 | 3.665 | 0.00760919 | 0.0560791 |
| 2307 | 10541426 | <a href="#">NM_008646</a>          | <a href="#">17837</a>     | mu2 globulin 2                 | <a href="#">Mug2</a>               | 1.201 | 3.022 | 0.0186628  | 0.104726  |
| 2308 | 10379044 | <a href="#">NM_033475</a>          | <a href="#">19376</a>     | RAB34, member of RAS oncogene  | <a href="#">Rab34</a>              | 1.201 | 1.731 | 0.125728   | 0.355019  |
| 2309 | 10458323 | <a href="#">ENSMUST00000115704</a> | <a href="#">381149</a>    | neuregulin 2                   | <a href="#">Nrg2</a>               | 1.201 | 3.572 | 0.00862883 | 0.0610776 |
| 2310 | 10577757 | <a href="#">NM_007404</a>          | <a href="#">11502</a>     | a disintegrin and metallopepti | <a href="#">Adam9</a>              | 1.201 | 2.049 | 0.0785112  | 0.266673  |
| 2311 | 10373452 | <a href="#">BC132471</a>           | <a href="#">229599</a>    | gene model 129, (NCBI)         | <a href="#">Gm129</a>              | 1.201 | 1.879 | 0.101141   | 0.311419  |
| 2312 | 10554693 | <a href="#">NM_023377</a>          | <a href="#">170460</a>    | StAR-related lipid transfer (S | <a href="#">Stard5</a>             | 1.201 | 2.913 | 0.0218203  | 0.116126  |
| 2313 | 10408870 | <a href="#">NM_025935</a>          | <a href="#">67046</a>     | TBC1 domain family, member 7   | <a href="#">Tbc1d7</a>             | 1.2   | 1.838 | 0.107464   | 0.32308   |
| 2314 | 10382300 | <a href="#">NM_011943</a>          | <a href="#">26399</a>     | mitogen-activated protein kina | <a href="#">Map2k6</a>             | 1.2   | 2.109 | 0.0716985  | 0.251634  |
| 2315 | 10571214 | <a href="#">NM_175136</a>          | <a href="#">68867</a>     | ring finger protein 122        | <a href="#">Rnf122</a>             | 1.2   | 2.967 | 0.0201993  | 0.11056   |
| 2316 | 10453692 | <a href="#">NM_025783</a>          | <a href="#">66700</a>     | vacuolar protein sorting 24 (y | <a href="#">Vps24</a>              | 1.2   | 1.011 | 0.344755   | 0.618903  |
| 2317 | 10594879 | <a href="#">NM_011544</a>          | <a href="#">21406</a>     | transcription factor 12        | <a href="#">Tcf12</a>              | 1.2   | 1.864 | 0.103421   | 0.316047  |
| 2318 | 10372891 | <a href="#">NM_001081037</a>       | <a href="#">117600</a>    | SLIT-ROBO Rho GTPase activatin | <a href="#">Srgap1</a>             | 1.2   | 2.933 | 0.0212124  | 0.114027  |
| 2319 | 10461176 | <a href="#">NM_019829</a>          | <a href="#">56389</a>     | syntaxin 5A                    | <a href="#">Stx5a</a>              | 1.2   | 2.975 | 0.0199469  | 0.109719  |
| 2320 | 10419370 | <a href="#">NM_207214</a>          | <a href="#">105504</a>    | exocyst complex component 5    | <a href="#">Exoc5</a>              | 1.2   | 2.463 | 0.0422908  | 0.179955  |
| 2321 | 10506431 | <a href="#">ENSMUST00000094945</a> | <a href="#">100038724</a> | predicted gene, ENSMUSG0000007 | <a href="#">ENSMUSG00000070886</a> | 1.199 | 1.368 | 0.212411   | 0.477963  |
| 2322 | 10458641 | <a href="#">NM_181543</a>          | <a href="#">240239</a>    | G protein-coupled receptor 151 | <a href="#">Gpr151</a>             | 1.199 | 2.008 | 0.0833883  | 0.276517  |
| 2323 | 10577623 | <a href="#">NM_024240</a>          | <a href="#">109145</a>    | GINS complex subunit 4 (Sld5 h | <a href="#">Gins4</a>              | 1.199 | 2.733 | 0.0283796  | 0.13823   |
| 2324 | 10399265 | <a href="#">NM_010881</a>          | <a href="#">17977</a>     | nuclear receptor coactivator 1 | <a href="#">Ncoal</a>              | 1.199 | 2.273 | 0.0561491  | 0.216623  |
| 2325 | 10437332 | <a href="#">NM_001025432</a>       | <a href="#">12914</a>     | CREB binding protein           | <a href="#">Crebbp</a>             | 1.199 | 3.424 | 0.010584   | 0.0706269 |
| 2326 | 10541071 | <a href="#">BC058515</a>           | <a href="#">213393</a>    | RIKEN cDNA 8430408G22 gene     | <a href="#">8430408G22Rik</a>      | 1.199 | 2.91  | 0.0219107  | 0.116412  |
| 2327 | 10382243 | <a href="#">NM_010303</a>          | <a href="#">14674</a>     | guanine nucleotide binding pro | <a href="#">Gna13</a>              | 1.199 | 2.209 | 0.0617995  | 0.229738  |
| 2328 | 10485562 | <a href="#">NM_010434</a>          | <a href="#">15259</a>     | homeodomain interacting protei | <a href="#">Hipk3</a>              | 1.199 | 2.909 | 0.0219582  | 0.11652   |
| 2329 | 10604735 | <a href="#">NM_011252</a>          | <a href="#">19655</a>     | RNA binding motif protein, X c | <a href="#">RbmX</a>               | 1.199 | 2.26  | 0.0572287  | 0.218894  |
| 2330 | 10395457 | <a href="#">NM_007960</a>          | <a href="#">14009</a>     | ets variant gene 1             | <a href="#">Etv1</a>               | 1.199 | 2.3   | 0.0538876  | 0.210688  |
| 2331 | 10507500 | <a href="#">NM_008135</a>          | <a href="#">14664</a>     | solute carrier family 6 (neuro | <a href="#">Slc6a9</a>             | 1.199 | 2.32  | 0.0523653  | 0.207033  |
| 2332 | 10517070 | <a href="#">NM_001017968</a>       | <a href="#">503610</a>    | zinc finger, DHHC domain conta | <a href="#">Zdhhc18</a>            | 1.198 | 1.876 | 0.101604   | 0.312332  |
| 2333 | 10501222 | <a href="#">NM_008183</a>          | <a href="#">14863</a>     | glutathione S-transferase, mu  | <a href="#">Gstm2</a>              | 1.198 | 1.564 | 0.160485   | 0.407897  |
| 2334 | 10553042 | <a href="#">NM_028544</a>          | <a href="#">69903</a>     | Ras interacting protein 1      | <a href="#">Rasip1</a>             | 1.198 | 2.524 | 0.0386283  | 0.16991   |
| 2335 | 10568529 | <a href="#">NM_175115</a>          | <a href="#">67143</a>     | IKAROS family zinc finger 5    | <a href="#">Ikzf5</a>              | 1.198 | 1.12  | 0.298796   | 0.574899  |
| 2336 | 10517336 | <a href="#">NM_013885</a>          | <a href="#">29876</a>     | chloride intracellular channel | <a href="#">Clc4</a>               | 1.198 | 3.826 | 0.00613861 | 0.0476151 |
| 2337 | 10588283 | <a href="#">NM_173781</a>          | <a href="#">270192</a>    | RAB6B, member RAS oncogene fam | <a href="#">Rab6b</a>              | 1.198 | 1.617 | 0.148647   | 0.390994  |
| 2338 | 10362428 |                                    |                           |                                |                                    | 1.198 | 0.47  | 0.651912   | 0.844083  |
| 2339 | 10529732 | <a href="#">NM_010474</a>          | <a href="#">15476</a>     | heparan sulfate (glucosamine)  | <a href="#">Hs3st1</a>             | 1.198 | 1.499 | 0.176325   | 0.430163  |
| 2340 | 10549968 | <a href="#">XR_034260</a>          | <a href="#">628737</a>    | similar to aurora kinase C     | <a href="#">LOC628737</a>          | 1.198 | 3.994 | 0.00492269 | 0.0408338 |
| 2341 | 10364888 | <a href="#">ENSMUST00000099469</a> | <a href="#">208266</a>    | DOT1-like, histone H3 methyltr | <a href="#">Dot1l</a>              | 1.198 | 2.225 | 0.0602985  | 0.226497  |
| 2342 | 10518226 | <a href="#">BC038488</a>           | <a href="#">230895</a>    | vacuolar protein sorting 13 D  | <a href="#">Vps13d</a>             | 1.198 | 2.574 | 0.0358833  | 0.161438  |
| 2343 | 10590060 | <a href="#">NM_133710</a>          | <a href="#">69274</a>     | CTD (carboxy-terminal domain,  | <a href="#">Ctdspl</a>             | 1.198 | 2.437 | 0.0439632  | 0.184792  |
| 2344 | 10534324 | <a href="#">NM_010717</a>          | <a href="#">16885</a>     | LIM-domain containing, protein | <a href="#">Limk1</a>              | 1.198 | 2.153 | 0.0671356  | 0.241908  |
| 2345 | 10415021 | <a href="#">NM_134076</a>          | <a href="#">105501</a>    | abhydrolase domain containing  | <a href="#">Abhd4</a>              | 1.198 | 2.022 | 0.0816905  | 0.272831  |
| 2346 | 10573615 | <a href="#">NM_019716</a>          | <a href="#">56452</a>     | origin recognition complex, su | <a href="#">Orc6l</a>              | 1.197 | 1.509 | 0.173878   | 0.426653  |
| 2347 | 10604620 | <a href="#">BC066167</a>           | <a href="#">78755</a>     | RIKEN cDNA 4632404H22 gene     | <a href="#">4632404H22Rik</a>      | 1.197 | 1.725 | 0.126919   | 0.356905  |
| 2348 | 10531796 | <a href="#">NM_172882</a>          | <a href="#">72145</a>     | WD repeat and FYVE domain cont | <a href="#">Wdfy3</a>              | 1.197 | 2.698 | 0.0298662  | 0.143184  |
| 2349 | 10511136 | <a href="#">NM_178699</a>          | <a href="#">230991</a>    | RIKEN cDNA B930041F14 gene     | <a href="#">B930041F14Rik</a>      | 1.197 | 1.838 | 0.107435   | 0.323077  |
| 2350 | 10344705 |                                    |                           |                                |                                    | 1.197 | 1.91  | 0.0965169  | 0.302379  |
| 2351 | 10536818 | <a href="#">NM_184053</a>          | <a href="#">12321</a>     | calumenin                      | <a href="#">Calu</a>               | 1.197 | 3.253 | 0.0134232  | 0.0833783 |
| 2352 | 10589982 | <a href="#">NM_013727</a>          | <a href="#">27215</a>     | 5-azacytidine induced gene 2   | <a href="#">Azi2</a>               | 1.196 | 2.541 | 0.0376592  | 0.167353  |
| 2353 | 10595189 | <a href="#">NM_172773</a>          | <a href="#">235504</a>    | solute carrier family 17 (anio | <a href="#">Slc17a5</a>            | 1.196 | 2.132 | 0.0693626  | 0.246733  |
| 2354 | 10456492 | <a href="#">BC096371</a>           | <a href="#">52662</a>     | DNA segment, Chr 18, ERATO Doi | <a href="#">D18ErtD653e</a>        | 1.196 | 1.555 | 0.162542   | 0.411049  |

|      |          |                                    |                        |                                 |                               |       |       |            |           |
|------|----------|------------------------------------|------------------------|---------------------------------|-------------------------------|-------|-------|------------|-----------|
| 2355 | 10500335 | <a href="#">NM_010186</a>          | <a href="#">14129</a>  | Fc receptor, IgG, high affinity | <a href="#">Fcgr1</a>         | 1.196 | 1.495 | 0.17741    | 0.431801  |
| 2356 | 10547469 | <a href="#">NM_001037155</a>       | <a href="#">406236</a> | hereditary sensory neuropathy,  | <a href="#">Hsn2</a>          | 1.196 | 2.127 | 0.0698307  | 0.24761   |
| 2357 | 10361139 | <a href="#">NM_011633</a>          | <a href="#">22033</a>  | Tnf receptor-associated factor  | <a href="#">Traf5</a>         | 1.196 | 1.647 | 0.14227    | 0.382232  |
| 2358 | 10575129 | <a href="#">NM_126165</a>          | <a href="#">116733</a> | vacuolar protein sorting 4a (y) | <a href="#">Vps4a</a>         | 1.196 | 2.027 | 0.0810745  | 0.271716  |
| 2359 | 10529613 | <a href="#">NM_021292</a>          | <a href="#">59056</a>  | Ellis van Creveld gene homolog  | <a href="#">Evc</a>           | 1.196 | 2.83  | 0.0246206  | 0.126168  |
| 2360 | 10580782 | <a href="#">NM_053246</a>          | <a href="#">114255</a> | docking protein 4               | <a href="#">Dok4</a>          | 1.196 | 2.17  | 0.0654586  | 0.238533  |
| 2361 | 10379630 | <a href="#">NM_011408</a>          | <a href="#">20556</a>  | schlafen 2                      | <a href="#">Slfn2</a>         | 1.196 | 2.89  | 0.0225746  | 0.118824  |
| 2362 | 10547140 | <a href="#">ENSMUST00000088896</a> | <a href="#">330401</a> | transmembrane and coiled coil   | <a href="#">Tmcc1</a>         | 1.196 | 2.392 | 0.0469816  | 0.192664  |
| 2363 | 10399463 |                                    |                        |                                 |                               | 1.195 | 3.111 | 0.0164263  | 0.0962129 |
| 2364 | 10491354 | <a href="#">NM_144519</a>          | <a href="#">67778</a>  | zinc finger protein 639         | <a href="#">Zfp639</a>        | 1.195 | 1.89  | 0.0994991  | 0.30816   |
| 2365 | 10399426 |                                    |                        |                                 |                               | 1.195 | 2.069 | 0.0761532  | 0.261436  |
| 2366 | 10463826 | <a href="#">NM_026377</a>          | <a href="#">67788</a>  | RIKEN cDNA 6330577E15 gene      | <a href="#">6330577E15Rik</a> | 1.195 | 3.398 | 0.0109699  | 0.0722269 |
| 2367 | 10429341 | <a href="#">NM_007982</a>          | <a href="#">14083</a>  | PTK2 protein tyrosine kinase 2  | <a href="#">Ptk2</a>          | 1.195 | 2.764 | 0.0271037  | 0.134054  |
| 2368 | 10376324 | <a href="#">DQ508487</a>           | <a href="#">631323</a> | interferon-gamma-inducible p47  | <a href="#">Irgb10</a>        | 1.195 | 2.029 | 0.0808083  | 0.271356  |
| 2369 | 10396143 | <a href="#">BC027570</a>           | <a href="#">73991</a>  | spastic paraplegia 3A homolog   | <a href="#">Spg3a</a>         | 1.195 | 3.295 | 0.0126528  | 0.0797173 |
| 2370 | 10375062 | <a href="#">NM_175000</a>          | <a href="#">216635</a> | hemoglobin, theta 1             | <a href="#">Hbq1</a>          | 1.195 | 0.791 | 0.454232   | 0.710744  |
| 2371 | 10501608 | <a href="#">NM_011693</a>          | <a href="#">22329</a>  | vascular cell adhesion molecul  | <a href="#">Vcam1</a>         | 1.195 | 2.173 | 0.0651922  | 0.238029  |
| 2372 | 10414553 | <a href="#">NM_001017422</a>       | <a href="#">53877</a>  | eosinophil-associated, ribonuc  | <a href="#">Ear4</a>          | 1.195 | 2.879 | 0.0229328  | 0.120261  |
| 2373 | 10372069 | <a href="#">NM_007706</a>          | <a href="#">216233</a> | suppressor of cytokine signali  | <a href="#">Socs2</a>         | 1.195 | 2.734 | 0.0283223  | 0.138077  |
| 2374 | 10352354 | <a href="#">ENSMUST00000066988</a> | <a href="#">329307</a> | RIKEN cDNA A430110L20 gene      | <a href="#">A430110L20Rik</a> | 1.195 | 2.119 | 0.070643   | 0.249403  |
| 2375 | 10491619 | <a href="#">ENSMUST00000057272</a> | <a href="#">229227</a> | RIKEN cDNA 4932438A13 gene      | <a href="#">4932438A13Rik</a> | 1.195 | 1.552 | 0.163343   | 0.412384  |
| 2376 | 10365899 | <a href="#">NM_029852</a>          | <a href="#">77048</a>  | coiled-coil domain containing   | <a href="#">Ccdc41</a>        | 1.194 | 2.372 | 0.0484403  | 0.196802  |
| 2377 | 10595787 | <a href="#">BC053441</a>           | <a href="#">73410</a>  | RIKEN cDNA 1700065D16 gene      | <a href="#">1700065D16Rik</a> | 1.194 | 1.883 | 0.100412   | 0.310087  |
| 2378 | 10593589 |                                    |                        |                                 |                               | 1.194 | 1.013 | 0.343735   | 0.617864  |
| 2379 | 10471967 | <a href="#">NM_029924</a>          | <a href="#">109241</a> | methyl-CpG binding domain prot  | <a href="#">Mbd5</a>          | 1.194 | 2.37  | 0.0485436  | 0.196931  |
| 2380 | 10489190 | <a href="#">NM_016916</a>          | <a href="#">53619</a>  | bladder cancer associated prot  | <a href="#">Blcap</a>         | 1.194 | 2.432 | 0.0443055  | 0.185761  |
| 2381 | 10471608 | <a href="#">BC038386</a>           | <a href="#">26920</a>  | centrosomal protein 110         | <a href="#">Cep110</a>        | 1.194 | 2.528 | 0.0384198  | 0.169439  |
| 2382 | 10373610 | <a href="#">NM_146318</a>          | <a href="#">258315</a> | olfactory receptor 767          | <a href="#">Olf767</a>        | 1.194 | 1.528 | 0.169127   | 0.42056   |
| 2383 | 10495136 | <a href="#">NM_023186</a>          | <a href="#">81600</a>  | chitinase, acidic               | <a href="#">Chia</a>          | 1.194 | 3.458 | 0.0100995  | 0.0685504 |
| 2384 | 10529156 | <a href="#">NM_026298</a>          | <a href="#">67661</a>  | intraflagellar transport 172 h  | <a href="#">Ift172</a>        | 1.194 | 2.114 | 0.0712411  | 0.250761  |
| 2385 | 10488459 | <a href="#">BC023805</a>           | <a href="#">668923</a> | zinc finger protein 442         | <a href="#">Zfp442</a>        | 1.194 | 1.171 | 0.278999   | 0.554016  |
| 2386 | 10445291 |                                    |                        |                                 |                               | 1.193 | 0.566 | 0.588672   | 0.805172  |
| 2387 | 10409994 | <a href="#">ENSMUST00000099446</a> | <a href="#">435366</a> | predicted gene, EG435366        | <a href="#">EG435366</a>      | 1.193 | 2.572 | 0.0359887  | 0.1618    |
| 2388 | 10379646 | <a href="#">NM_011409</a>          | <a href="#">20557</a>  | schlafen 3                      | <a href="#">Slfn3</a>         | 1.193 | 2.789 | 0.0261445  | 0.130964  |
| 2389 | 10353311 | <a href="#">NM_020604</a>          | <a href="#">57339</a>  | junctional protein 1            | <a href="#">Jph1</a>          | 1.193 | 1.657 | 0.140244   | 0.378815  |
| 2390 | 10418053 | <a href="#">NM_010610</a>          | <a href="#">16531</a>  | potassium large conductance ca  | <a href="#">Kenma1</a>        | 1.193 | 1.124 | 0.297091   | 0.573626  |
| 2391 | 10413530 | <a href="#">NM_133761</a>          | <a href="#">75901</a>  | DCP1 decapping enzyme homolog   | <a href="#">Dcp1a</a>         | 1.193 | 1.721 | 0.127704   | 0.358351  |
| 2392 | 10419744 | <a href="#">NM_011405</a>          | <a href="#">20540</a>  | solute carrier family 7 (catio  | <a href="#">Slc7a7</a>        | 1.193 | 2.149 | 0.0675554  | 0.242768  |
| 2393 | 10514300 | <a href="#">NM_177361</a>          | <a href="#">242519</a> | interferon alpha 12             | <a href="#">Ifna12</a>        | 1.193 | 1.985 | 0.0862967  | 0.282193  |
| 2394 | 10416090 | <a href="#">NM_019675</a>          | <a href="#">56471</a>  | stathmin-like 4                 | <a href="#">Stmn4</a>         | 1.193 | 3.215 | 0.0141679  | 0.0866048 |
| 2395 | 10410375 | <a href="#">NM_001001130</a>       | <a href="#">22746</a>  | zinc finger protein 85, relate  | <a href="#">Zfp85-rs1</a>     | 1.193 | 1.148 | 0.287781   | 0.563515  |
| 2396 | 10458424 | <a href="#">NM_175770</a>          | <a href="#">24074</a>  | TAF7 RNA polymerase II, TATA b  | <a href="#">Taf7</a>          | 1.193 | 1.986 | 0.086208   | 0.282077  |
| 2397 | 10493309 | <a href="#">NM_009069</a>          | <a href="#">19769</a>  | Ras-like without CAAX 1         | <a href="#">Rit1</a>          | 1.193 | 3.091 | 0.0168898  | 0.0978674 |
| 2398 | 10381809 | <a href="#">NM_016780</a>          | <a href="#">16416</a>  | integrin beta 3                 | <a href="#">Itgb3</a>         | 1.192 | 2.583 | 0.03542    | 0.1603    |
| 2399 | 10516393 | <a href="#">NM_153177</a>          | <a href="#">76850</a>  | eukaryotic translation initiat  | <a href="#">Eif2c4</a>        | 1.192 | 1.998 | 0.0847316  | 0.279408  |
| 2400 | 10486026 | <a href="#">NM_175466</a>          | <a href="#">228491</a> | zinc finger protein 770         | <a href="#">Zfp770</a>        | 1.192 | 3.056 | 0.0177583  | 0.101017  |
| 2401 | 10567580 | <a href="#">NM_030691</a>          | <a href="#">80719</a>  | immunoglobulin superfamily, me  | <a href="#">Igsf6</a>         | 1.192 | 1.625 | 0.147012   | 0.388942  |
| 2402 | 10374478 | <a href="#">NM_021372</a>          | <a href="#">58172</a>  | SERTA domain containing 2       | <a href="#">Sertad2</a>       | 1.192 | 2.93  | 0.0213042  | 0.114271  |
| 2403 | 10460259 | <a href="#">ENSMUST00000100032</a> | <a href="#">621603</a> | aldehyde dehydrogenase 3 famil  | <a href="#">Aldh3b2</a>       | 1.192 | 2.766 | 0.02705    | 0.13393   |
| 2404 | 10359235 | <a href="#">NM_177644</a>          | <a href="#">226525</a> | RAS protein activator like 2    | <a href="#">Rasal2</a>        | 1.192 | 1.999 | 0.0845258  | 0.279078  |
| 2405 | 10368675 | <a href="#">NM_008538</a>          | <a href="#">17118</a>  | myristoylated alanine rich pro  | <a href="#">Marcks</a>        | 1.192 | 4.174 | 0.00390485 | 0.0343773 |
| 2406 | 10468217 | <a href="#">NM_016860</a>          | <a href="#">54130</a>  | ARPI1 actin-related protein 1 h | <a href="#">Actr1a</a>        | 1.191 | 1.959 | 0.0897475  | 0.289139  |
| 2407 | 10377725 | <a href="#">NM_007864</a>          | <a href="#">13385</a>  | discs, large homolog 4 (Drosop  | <a href="#">Dlg4</a>          | 1.191 | 2.673 | 0.030983   | 0.146884  |

|      |          |                                    |                           |                                |                               |       |       |            |           |
|------|----------|------------------------------------|---------------------------|--------------------------------|-------------------------------|-------|-------|------------|-----------|
| 2408 | 10463557 | <a href="#">NM_178930</a>          | <a href="#">107338</a>    | golgi-specific brefeldin A-res | <a href="#">Gbf1</a>          | 1.191 | 2.322 | 0.0521603  | 0.206609  |
| 2409 | 10470529 | <a href="#">NM_019498</a>          | <a href="#">56177</a>     | olfactomedin 1                 | <a href="#">Olfm1</a>         | 1.191 | 3.464 | 0.0100081  | 0.0680857 |
| 2410 | 10506388 | <a href="#">NM_026100</a>          | <a href="#">67344</a>     | Tctex1 domain containing 1     | <a href="#">Tctex1d1</a>      | 1.191 | 1.516 | 0.171964   | 0.424079  |
| 2411 | 10491721 | <a href="#">NM_011896</a>          | <a href="#">24063</a>     | sprouty homolog 1 (Drosophila) | <a href="#">Spry1</a>         | 1.191 | 2.624 | 0.0333129  | 0.153927  |
| 2412 | 10593499 | <a href="#">NM_178906</a>          | <a href="#">330941</a>    | expressed sequence AI593442    | <a href="#">AI593442</a>      | 1.191 | 2.798 | 0.0257969  | 0.130148  |
| 2413 | 10416112 | <a href="#">NM_175498</a>          | <a href="#">239157</a>    | paraneoplastic antigen MA2     | <a href="#">Pnma2</a>         | 1.191 | 2.146 | 0.0678893  | 0.243338  |
| 2414 | 10468294 | <a href="#">BC019197</a>           | <a href="#">72691</a>     | RIKEN cDNA 2810048G17 gene     | <a href="#">2810048G17Rik</a> | 1.191 | 2.027 | 0.0810414  | 0.271716  |
| 2415 | 10582162 | <a href="#">NM_028071</a>          | <a href="#">72042</a>     | coactosin-like 1 (Dictyosteliu | <a href="#">Cot1</a>          | 1.191 | 1.113 | 0.301621   | 0.577839  |
| 2416 | 10549222 | <a href="#">NM_007532</a>          | <a href="#">12035</a>     | branched chain aminotransferas | <a href="#">Beat1</a>         | 1.191 | 3.293 | 0.0127031  | 0.0800101 |
| 2417 | 10422009 |                                    |                           |                                |                               | 1.191 | 1.826 | 0.109351   | 0.326755  |
| 2418 | 10503241 | <a href="#">NM_013526</a>          | <a href="#">242316</a>    | growth differentiation factor  | <a href="#">Gdf6</a>          | 1.191 | 1.893 | 0.0989785  | 0.307265  |
| 2419 | 10447490 | <a href="#">NM_001025309</a>       | <a href="#">224938</a>    | praja 2, RING-H2 motif contain | <a href="#">Pja2</a>          | 1.191 | 2.171 | 0.0654142  | 0.238533  |
| 2420 | 10406482 | <a href="#">NM_023243</a>          | <a href="#">66671</a>     | cyclin H                       | <a href="#">Ccnh</a>          | 1.19  | 3.225 | 0.0139783  | 0.0858203 |
| 2421 | 10466712 | <a href="#">NM_174857</a>          | <a href="#">71738</a>     | MAM domain containing 2        | <a href="#">Mamdc2</a>        | 1.19  | 1.409 | 0.200582   | 0.462553  |
| 2422 | 10602401 | <a href="#">NM_008001</a>          | <a href="#">14163</a>     | FYVE, RhoGEF and PH domain con | <a href="#">Fgd1</a>          | 1.19  | 3.195 | 0.0145818  | 0.0885208 |
| 2423 | 10503134 | <a href="#">NM_001098227</a>       | <a href="#">53378</a>     | syndecan binding protein       | <a href="#">Sdcbp</a>         | 1.19  | 2.819 | 0.0250091  | 0.127548  |
| 2424 | 10584628 | <a href="#">NM_009382</a>          | <a href="#">21838</a>     | thymus cell antigen 1, theta   | <a href="#">Thy1</a>          | 1.19  | 2.792 | 0.0260334  | 0.130751  |
| 2425 | 10505172 | <a href="#">BC119039</a>           | <a href="#">72429</a>     | RIKEN cDNA 2010203O07 gene     | <a href="#">2010203O07Rik</a> | 1.19  | 2.933 | 0.0211935  | 0.114027  |
| 2426 | 10418848 | <a href="#">ENSMUST00000061753</a> | <a href="#">545030</a>    | WD repeat and FYVE domain cont | <a href="#">Wdfy4</a>         | 1.19  | 2.701 | 0.0297633  | 0.142831  |
| 2427 | 10412657 |                                    |                           |                                |                               | 1.19  | 1.092 | 0.309914   | 0.586734  |
| 2428 | 10398459 | <a href="#">ENSMUST00000065483</a> | <a href="#">26931</a>     | protein phosphatase 2, regulat | <a href="#">Ppp2r5c</a>       | 1.19  | 0.713 | 0.498377   | 0.742426  |
| 2429 | 10475420 | <a href="#">NM_080510</a>          | <a href="#">70928</a>     | tripartite motif-containing 69 | <a href="#">Trim69</a>        | 1.189 | 3.898 | 0.00558011 | 0.0447652 |
| 2430 | 10590489 | <a href="#">NM_009544</a>          | <a href="#">22646</a>     | zinc finger protein 105        | <a href="#">Zfp105</a>        | 1.189 | 1.552 | 0.163243   | 0.412279  |
| 2431 | 10427538 | <a href="#">NM_201232</a>          | <a href="#">71175</a>     | Nipped-B homolog (Drosophila)  | <a href="#">Nipbl</a>         | 1.189 | 2.804 | 0.0255608  | 0.129389  |
| 2432 | 10369413 | <a href="#">NM_009163</a>          | <a href="#">20397</a>     | sphingosine phosphate lyase 1  | <a href="#">Sgpl1</a>         | 1.189 | 1.956 | 0.0901982  | 0.289885  |
| 2433 | 10477717 | <a href="#">NM_011171</a>          | <a href="#">19124</a>     | protein C receptor, endothelia | <a href="#">Procr</a>         | 1.189 | 2.319 | 0.0523894  | 0.207062  |
| 2434 | 10479247 | <a href="#">NM_001081289</a>       | <a href="#">71532</a>     | RIKEN cDNA 9030418K01 gene     | <a href="#">9030418K01Rik</a> | 1.189 | 2.283 | 0.0553031  | 0.214615  |
| 2435 | 10374983 | <a href="#">NM_023906</a>          | <a href="#">65257</a>     | ankyrin repeat and SOCS box-co | <a href="#">Asb3</a>          | 1.189 | 1.376 | 0.210173   | 0.475495  |
| 2436 | 10590808 | <a href="#">NM_009534</a>          | <a href="#">22601</a>     | yes-associated protein 1       | <a href="#">Yap1</a>          | 1.189 | 2.886 | 0.0227115  | 0.119337  |
| 2437 | 10575733 | <a href="#">NM_028131</a>          | <a href="#">72155</a>     | centromere protein N           | <a href="#">Cenpn</a>         | 1.189 | 2.086 | 0.0742639  | 0.257711  |
| 2438 | 10466355 | <a href="#">NM_001011841</a>       | <a href="#">258121</a>    | olfactory receptor 1465        | <a href="#">Olf1465</a>       | 1.189 | 2.076 | 0.0753142  | 0.259567  |
| 2439 | 10534640 | <a href="#">NM_024474</a>          | <a href="#">140709</a>    | EMI domain containing 2        | <a href="#">Emid2</a>         | 1.189 | 3.412 | 0.010754   | 0.0714364 |
| 2440 | 10357698 | <a href="#">NM_178874</a>          | <a href="#">68875</a>     | transmembrane and coiled-coil  | <a href="#">Tmcc2</a>         | 1.189 | 1.88  | 0.100868   | 0.310852  |
| 2441 | 10543471 | <a href="#">NM_133931</a>          | <a href="#">101185</a>    | protection of telomeres 1A     | <a href="#">Pot1a</a>         | 1.189 | 2.61  | 0.0340112  | 0.156     |
| 2442 | 10407307 | <a href="#">NM_013826</a>          | <a href="#">17434</a>     | molybdenum cofactor synthesis  | <a href="#">Mocs2</a>         | 1.189 | 1.953 | 0.0905717  | 0.290908  |
| 2443 | 10436692 |                                    |                           |                                |                               | 1.189 | 1.176 | 0.277075   | 0.552231  |
| 2444 | 10464443 | <a href="#">XR_031496</a>          | <a href="#">100045278</a> | similar to ribosomal protein S | <a href="#">LOC100045278</a>  | 1.189 | 1.24  | 0.253779   | 0.528036  |
| 2445 | 10578352 | <a href="#">NM_145594</a>          | <a href="#">234199</a>    | fibrinogen-like protein 1      | <a href="#">Fgl1</a>          | 1.189 | 0.975 | 0.361112   | 0.632903  |
| 2446 | 10548899 | <a href="#">NM_181988</a>          | <a href="#">232441</a>    | RAS-like, estrogen-regulated,  | <a href="#">Rerg</a>          | 1.188 | 1.723 | 0.127234   | 0.357506  |
| 2447 | 10578709 | <a href="#">NM_028220</a>          | <a href="#">244484</a>    | WD repeat domain 17            | <a href="#">Wdr17</a>         | 1.188 | 2.126 | 0.0698937  | 0.247709  |
| 2448 | 10455472 | <a href="#">ENSMUST00000025350</a> | <a href="#">70640</a>     | DCP2 decapping enzyme homolog  | <a href="#">Dcp2</a>          | 1.188 | 1.907 | 0.0969761  | 0.30331   |
| 2449 | 10529937 | <a href="#">NM_030265</a>          | <a href="#">80334</a>     | Kv channel interacting protein | <a href="#">Kenip4</a>        | 1.188 | 2.981 | 0.0197969  | 0.109149  |
| 2450 | 10435226 | <a href="#">NM_080557</a>          | <a href="#">69150</a>     | sorting nexin 4                | <a href="#">Snx4</a>          | 1.188 | 2.746 | 0.0278489  | 0.136748  |
| 2451 | 10468885 | <a href="#">ENSMUST00000099260</a> | <a href="#">414758</a>    | RIKEN cDNA 5830428H23 gene     | <a href="#">5830428H23Rik</a> | 1.188 | 1.833 | 0.108158   | 0.32441   |
| 2452 | 10488378 | <a href="#">NM_009378</a>          | <a href="#">21824</a>     | thrombomodulin                 | <a href="#">Thbd</a>          | 1.188 | 2.486 | 0.040886   | 0.176284  |
| 2453 | 10434552 |                                    |                           |                                |                               | 1.188 | 2.818 | 0.0250646  | 0.127643  |
| 2454 | 10465916 | <a href="#">ENSMUST00000096230</a> | <a href="#">225908</a>    | gene model 98, (NCBI)          | <a href="#">Gm98</a>          | 1.188 | 1.589 | 0.154906   | 0.400115  |
| 2455 | 10409061 |                                    |                           |                                |                               | 1.187 | 0.947 | 0.374089   | 0.64426   |
| 2456 | 10487277 | <a href="#">NM_021450</a>          | <a href="#">58800</a>     | transient receptor potential c | <a href="#">Trpm7</a>         | 1.187 | 3.586 | 0.00846698 | 0.0602983 |
| 2457 | 10420348 | <a href="#">NM_144842</a>          | <a href="#">219105</a>    | zinc finger, MYM-type 5        | <a href="#">Zmym5</a>         | 1.187 | 1.311 | 0.230069   | 0.501055  |
| 2458 | 10479026 | <a href="#">NM_175112</a>          | <a href="#">66679</a>     | RAE1 RNA export 1 homolog 1c   | <a href="#">Rae1</a>          | 1.187 | 2.705 | 0.0295628  | 0.142063  |

|      |          |                                    |                        |                                    |                                    |       |       |            |           |
|------|----------|------------------------------------|------------------------|------------------------------------|------------------------------------|-------|-------|------------|-----------|
| 2459 | 10507273 | <a href="#">NM_181585</a>          | <a href="#">18710</a>  | phosphatidylinositol 3 kinase,     | <a href="#">Pik3r3</a>             | 1.187 | 1.435 | 0.193125   | 0.452493  |
| 2460 | 10416181 | <a href="#">NM_009285</a>          | <a href="#">20855</a>  | stanniocalcin 1                    | <a href="#">Stc1</a>               | 1.187 | 3.297 | 0.0126252  | 0.0796618 |
| 2461 | 10536917 | <a href="#">NM_176996</a>          | <a href="#">319757</a> | smoothed homolog<br>(Drosophila)   | <a href="#">Smo</a>                | 1.187 | 3.353 | 0.0116799  | 0.0754765 |
| 2462 | 10506298 | <a href="#">NM_175036</a>          | <a href="#">230514</a> | leptin receptor overlapping tr     | <a href="#">Leprot</a>             | 1.187 | 1.842 | 0.10686    | 0.322408  |
| 2463 | 10520043 | <a href="#">NM_001081231</a>       | <a href="#">269629</a> | lipoma HMGIC fusion partner-li     | <a href="#">Lhfpl3</a>             | 1.187 | 1.594 | 0.153759   | 0.398309  |
| 2464 | 10451039 | <a href="#">NM_028711</a>          | <a href="#">74011</a>  | solute carrier family 25, memb     | <a href="#">Slc25a27</a>           | 1.187 | 2.271 | 0.056269   | 0.216807  |
| 2465 | 10549377 | <a href="#">BC052362</a>           | <a href="#">73344</a>  | RIKEN cDNA 1700034J05 gene         | <a href="#">1700034J05Rik</a>      | 1.187 | 1.42  | 0.197368   | 0.457905  |
| 2466 | 10407209 | <a href="#">ENSMUST00000091218</a> | <a href="#">108861</a> | RIKEN cDNA 4833412L08 gene         | <a href="#">4833412L08Rik</a>      | 1.186 | 1.842 | 0.10679    | 0.322336  |
| 2467 | 10350733 | <a href="#">NM_011267</a>          | <a href="#">19734</a>  | regulator of G-protein signali     | <a href="#">Rgs16</a>              | 1.186 | 2.698 | 0.0298705  | 0.143184  |
| 2468 | 10462111 | <a href="#">ENSMUST00000067077</a> | <a href="#">791290</a> | predicted gene,<br>ENSMUSG00000005 | <a href="#">ENSMUSG00000054178</a> | 1.186 | 2.091 | 0.0736844  | 0.256552  |
| 2469 | 10496975 | <a href="#">NM_001081263</a>       | <a href="#">242259</a> | solute carrier family 44, memb     | <a href="#">Slc44a5</a>            | 1.186 | 1.648 | 0.142034   | 0.381888  |
| 2470 | 10543870 | <a href="#">ENSMUST00000075773</a> | <a href="#">18153</a>  | neoplastic progression 2           | <a href="#">Npn2</a>               | 1.186 | 1.244 | 0.252447   | 0.526583  |
| 2471 | 10506822 | <a href="#">NM_011015</a>          | <a href="#">18392</a>  | origin recognition complex, su     | <a href="#">Orc11</a>              | 1.186 | 2.106 | 0.07201    | 0.252375  |
| 2472 | 10398224 | <a href="#">NM_010010</a>          | <a href="#">13116</a>  | cytochrome P450, family 46, su     | <a href="#">Cyp46a1</a>            | 1.186 | 2.498 | 0.0401467  | 0.174304  |
| 2473 | 10351832 | <a href="#">ENSMUST00000111226</a> | <a href="#">71870</a>  | coiled-coil domain containing      | <a href="#">Ccdc19</a>             | 1.186 | 2.621 | 0.0334866  | 0.154358  |
| 2474 | 10556573 | <a href="#">ENSMUST00000032900</a> | <a href="#">68469</a>  | RIKEN cDNA 1110006G14<br>gene      | <a href="#">1110006G14Rik</a>      | 1.186 | 1.749 | 0.122428   | 0.349859  |
| 2475 | 10463410 | <a href="#">BC060679</a>           | <a href="#">226151</a> | RIKEN cDNA 6030443O07<br>gene      | <a href="#">6030443O07Rik</a>      | 1.186 | 2.797 | 0.025834   | 0.130211  |
| 2476 | 10491038 | <a href="#">NM_030732</a>          | <a href="#">81004</a>  | transducin (beta)-like 1X-link     | <a href="#">Tb1xr1</a>             | 1.186 | 2.094 | 0.0733497  | 0.255698  |
| 2477 | 10458940 | <a href="#">NM_175751</a>          | <a href="#">269023</a> | zinc finger protein 608            | <a href="#">Zfp608</a>             | 1.186 | 1.717 | 0.128484   | 0.359524  |
| 2478 | 10518228 | <a href="#">ENSMUST00000036579</a> | <a href="#">230895</a> | vacuolar protein sorting 13 D      | <a href="#">Vps13d</a>             | 1.186 | 3.456 | 0.0101153  | 0.0685504 |
| 2479 | 10477167 | <a href="#">NM_025543</a>          | <a href="#">66405</a>  | malignant T cell amplified seq     | <a href="#">Mets2</a>              | 1.186 | 2.575 | 0.0358317  | 0.161363  |
| 2480 | 10351603 | <a href="#">NM_001005508</a>       | <a href="#">226652</a> | Rho GTPase activating protein      | <a href="#">Arhgap30</a>           | 1.186 | 1.707 | 0.130276   | 0.362012  |
| 2481 | 10359405 | <a href="#">NM_001039482</a>       | <a href="#">226541</a> | kelch-like 20 (Drosophila)         | <a href="#">Klh20</a>              | 1.185 | 3     | 0.019243   | 0.106903  |
| 2482 | 10529792 | <a href="#">ENSMUST00000050556</a> | <a href="#">665775</a> | RIKEN cDNA A230054D04<br>gene      | <a href="#">A230054D04Rik</a>      | 1.185 | 2.465 | 0.0421786  | 0.179731  |
| 2483 | 10502052 | <a href="#">ENSMUST00000029662</a> | <a href="#">71481</a>  | alpha-kinase 1                     | <a href="#">Alpk1</a>              | 1.185 | 1.572 | 0.158644   | 0.405496  |
| 2484 | 10381113 | <a href="#">NM_001025244</a>       | <a href="#">432602</a> | predicted gene,<br>OTTMUSG00000000 | <a href="#">OTTMUSG00000002177</a> | 1.185 | 3.592 | 0.00839602 | 0.0598736 |
| 2485 | 10597758 | <a href="#">NM_153287</a>          | <a href="#">215418</a> | AXIN1 up-regulated 1               | <a href="#">Axud1</a>              | 1.185 | 2.369 | 0.048682   | 0.197379  |
| 2486 | 10359890 | <a href="#">NM_023284</a>          | <a href="#">66977</a>  | NUF2, NDC80 kinetochore<br>comple  | <a href="#">Nuf2</a>               | 1.185 | 2.144 | 0.0680826  | 0.243829  |
| 2487 | 10503695 | <a href="#">NM_007521</a>          | <a href="#">12014</a>  | BTB and CNC homology 2             | <a href="#">Bach2</a>              | 1.185 | 3.624 | 0.00803852 | 0.0581679 |
| 2488 | 10564451 | <a href="#">NM_001033713</a>       | <a href="#">17258</a>  | myocyte enhancer factor 2A         | <a href="#">Mef2a</a>              | 1.185 | 1.994 | 0.085202   | 0.280273  |
| 2489 | 10407392 | <a href="#">NM_134063</a>          | <a href="#">105203</a> | cDNA sequence BC016423             | <a href="#">BC016423</a>           | 1.185 | 3.069 | 0.0174396  | 0.0998764 |
| 2490 | 10427253 |                                    |                        |                                    |                                    | 1.185 | 1.26  | 0.246941   | 0.52026   |
| 2491 | 10489357 | <a href="#">NM_021566</a>          | <a href="#">59091</a>  | junctophilin 2                     | <a href="#">Jph2</a>               | 1.185 | 2.863 | 0.0234701  | 0.121869  |
| 2492 | 10450957 | <a href="#">NM_031863</a>          | <a href="#">83815</a>  | centromere protein Q               | <a href="#">Cenpq</a>              | 1.185 | 2.327 | 0.0517675  | 0.20563   |
| 2493 | 10390103 | <a href="#">NM_133667</a>          | <a href="#">18604</a>  | pyruvate dehydrogenase kinase,     | <a href="#">Pdk2</a>               | 1.185 | 2.496 | 0.0402468  | 0.174559  |
| 2494 | 10396640 | <a href="#">NM_001101471</a>       | <a href="#">238276</a> | A kinase (PRKA) anchor protein     | <a href="#">Akap5</a>              | 1.185 | 2.305 | 0.0535489  | 0.209868  |
| 2495 | 10563611 | <a href="#">NM_009117</a>          | <a href="#">20208</a>  | serum amyloid A 1                  | <a href="#">Saa1</a>               | 1.184 | 1.347 | 0.218741   | 0.486928  |
| 2496 | 10517401 | <a href="#">NM_001013756</a>       | <a href="#">230824</a> | grainyhead-like 3 (Drosophila)     | <a href="#">Grhl3</a>              | 1.184 | 2.661 | 0.0315545  | 0.148594  |
| 2497 | 10425092 | <a href="#">NM_028195</a>          | <a href="#">72318</a>  | pleckstrin homology, Sec7 and      | <a href="#">Pscd4</a>              | 1.184 | 1.853 | 0.105067   | 0.319364  |
| 2498 | 10573210 | <a href="#">NM_013641</a>          | <a href="#">19216</a>  | prostaglandin E receptor 1 (su     | <a href="#">Ptger1</a>             | 1.184 | 2.326 | 0.0518944  | 0.206057  |
| 2499 | 10457183 | <a href="#">NM_198295</a>          | <a href="#">67988</a>  | thioredoxin domain containing      | <a href="#">Txndc10</a>            | 1.184 | 1.815 | 0.111164   | 0.329929  |
| 2500 | 10529457 | <a href="#">NM_153107</a>          | <a href="#">242939</a> | carboxypeptidase Z                 | <a href="#">Cpz</a>                | 1.184 | 3.581 | 0.00852594 | 0.0605551 |
| 2501 | 10597883 | <a href="#">NM_133979</a>          | <a href="#">102566</a> | transmembrane protein 16K          | <a href="#">Tmem16k</a>            | 1.184 | 0.903 | 0.395782   | 0.663394  |
| 2502 | 10563583 | <a href="#">BC087944</a>           | <a href="#">78935</a>  | serum amyloid A-like 1             | <a href="#">Saa1</a>               | 1.184 | 2.282 | 0.0553508  | 0.214629  |
| 2503 | 10548030 | <a href="#">NM_007657</a>          | <a href="#">12527</a>  | CD9 antigen                        | <a href="#">Cd9</a>                | 1.184 | 2.038 | 0.0797604  | 0.269041  |
| 2504 | 10474977 | <a href="#">NM_019769</a>          | <a href="#">56398</a>  | RIKEN cDNA 1500003O03<br>gene      | <a href="#">1500003O03Rik</a>      | 1.184 | 1.987 | 0.0860711  | 0.2817    |
| 2505 | 10365933 | <a href="#">NM_001001932</a>       | <a href="#">216238</a> | early endosome antigen 1           | <a href="#">Eea1</a>               | 1.183 | 2.2   | 0.0625872  | 0.23162   |
| 2506 | 10520232 |                                    |                        |                                    |                                    | 1.183 | 2.26  | 0.057269   | 0.218979  |
| 2507 | 10476163 | <a href="#">NM_008980</a>          | <a href="#">19262</a>  | protein tyrosine phosphatase,      | <a href="#">Ptpra</a>              | 1.183 | 2.689 | 0.0302907  | 0.144706  |
| 2508 | 10426584 | <a href="#">BC048654</a>           | <a href="#">73302</a>  | RIKEN cDNA 1700031M16              | <a href="#">1700031M16Rik</a>      | 1.183 | 2.947 | 0.0207687  | 0.112772  |

|      |          |                                    |                           | gene                              |                                    |       |       |            |           |
|------|----------|------------------------------------|---------------------------|-----------------------------------|------------------------------------|-------|-------|------------|-----------|
| 2509 | 10575598 | <a href="#">NM_133206</a>          | <a href="#">170737</a>    | zinc and ring finger 1            | <a href="#">Znrf1</a>              | 1.183 | 2.476 | 0.0414842  | 0.177631  |
| 2510 | 10412773 | <a href="#">NM_001033270</a>       | <a href="#">218756</a>    | solute carrier family 4, sodiu    | <a href="#">Slc4a7</a>             | 1.183 | 1.316 | 0.228409   | 0.49943   |
| 2511 | 10606315 | <a href="#">NM_001001176</a>       | <a href="#">407786</a>    | TAF9B RNA polymerase II,<br>TATA  | <a href="#">Taf9b</a>              | 1.183 | 1.048 | 0.328435   | 0.60481   |
| 2512 | 10457243 | <a href="#">ENSMUST00000074702</a> | <a href="#">791318</a>    | predicted gene,<br>ENSMUSG0000006 | <a href="#">ENSMUSG00000063087</a> | 1.183 | 2.658 | 0.0316963  | 0.149063  |
| 2513 | 10545895 | <a href="#">XM_485799</a>          | <a href="#">434057</a>    | N-acetyltransferase 8B            | <a href="#">Nat8b</a>              | 1.183 | 1.673 | 0.13697    | 0.373595  |
| 2514 | 10433057 | <a href="#">NM_026192</a>          | <a href="#">67488</a>     | calcium binding and coiled coi    | <a href="#">Calcoco1</a>           | 1.183 | 2.146 | 0.0679146  | 0.243363  |
| 2515 | 10448380 | <a href="#">NM_026305</a>          | <a href="#">67673</a>     | transcription elongation facto    | <a href="#">Tceb2</a>              | 1.183 | 1.862 | 0.10371    | 0.316611  |
| 2516 | 10385665 | <a href="#">NM_013744</a>          | <a href="#">27274</a>     | zinc finger protein 354B          | <a href="#">Zfp354b</a>            | 1.183 | 2.654 | 0.031892   | 0.149485  |
| 2517 | 10413220 | <a href="#">ENSMUST00000100823</a> | <a href="#">100038401</a> | predicted gene,<br>ENSMUSG0000007 | <a href="#">ENSMUSG00000072684</a> | 1.182 | 2.914 | 0.0217885  | 0.116015  |
| 2518 | 10467400 | <a href="#">NM_206537</a>          | <a href="#">404195</a>    | cytochrome P450, family 2, sub    | <a href="#">Cyp2c54</a>            | 1.182 | 2.691 | 0.0301849  | 0.144428  |
| 2519 | 10380285 | <a href="#">NM_026433</a>          | <a href="#">67888</a>     | transmembrane protein 100         | <a href="#">Tmem100</a>            | 1.182 | 1.2   | 0.268048   | 0.542786  |
| 2520 | 10521337 | <a href="#">NM_173402</a>          | <a href="#">71729</a>     | regulator of G-protein signali    | <a href="#">Rgs12</a>              | 1.182 | 2.937 | 0.0210693  | 0.113587  |
| 2521 | 10366514 | <a href="#">ENSMUST00000020371</a> | <a href="#">67342</a>     | RIKEN cDNA 1700058G18<br>gene     | <a href="#">1700058G18Rik</a>      | 1.182 | 1.807 | 0.112535   | 0.33223   |
| 2522 | 10482868 | <a href="#">NM_028118</a>          | <a href="#">72137</a>     | WD repeat, SAM and U-box<br>domai | <a href="#">Wdsub1</a>             | 1.182 | 1.705 | 0.13073    | 0.362906  |
| 2523 | 10446785 | <a href="#">NM_016962</a>          | <a href="#">50850</a>     | spastin                           | <a href="#">Spast</a>              | 1.182 | 3.109 | 0.0164794  | 0.0962943 |
| 2524 | 10551791 | <a href="#">BC055817</a>           | <a href="#">233058</a>    | zinc finger protein 420           | <a href="#">Zfp420</a>             | 1.182 | 1.334 | 0.222917   | 0.492857  |
| 2525 | 10371627 | <a href="#">NM_175418</a>          | <a href="#">109272</a>    | RIKEN cDNA 8030451F13 gene        | <a href="#">8030451F13Rik</a>      | 1.182 | 1.81  | 0.112011   | 0.331272  |
| 2526 | 10351119 | <a href="#">NM_016796</a>          | <a href="#">53330</a>     | vesicle-associated membrane pr    | <a href="#">Vamp4</a>              | 1.182 | 2.118 | 0.0707451  | 0.249639  |
| 2527 | 10509002 | <a href="#">NM_011270</a>          | <a href="#">19746</a>     | Rh blood group, D antigen         | <a href="#">Rhd</a>                | 1.182 | 0.85  | 0.42262    | 0.684899  |
| 2528 | 10421186 | <a href="#">ENSMUST00000070887</a> | <a href="#">791405</a>    | predicted gene,<br>ENSMUSG0000005 | <a href="#">ENSMUSG00000056640</a> | 1.182 | 0.894 | 0.399933   | 0.665979  |
| 2529 | 10407533 |                                    |                           |                                   |                                    | 1.182 | 2.141 | 0.0683649  | 0.244408  |
| 2530 | 10406614 | <a href="#">AK090249</a>           | <a href="#">238771</a>    | similar to Metaxin 1              | <a href="#">LOC238771</a>          | 1.182 | 1.152 | 0.286158   | 0.561637  |
| 2531 | 10505182 | <a href="#">NM_025277</a>          | <a href="#">14700</a>     | guanine nucleotide binding pro    | <a href="#">Gng10</a>              | 1.182 | 2.627 | 0.0331742  | 0.153573  |
| 2532 | 10433929 | <a href="#">NM_176833</a>          | <a href="#">68606</a>     | protein phosphatase 1F (PP2C d    | <a href="#">Ppm1f</a>              | 1.182 | 2.904 | 0.0221241  | 0.117153  |
| 2533 | 10392990 | <a href="#">NM_008163</a>          | <a href="#">14784</a>     | growth factor receptor bound p    | <a href="#">Grb2</a>               | 1.182 | 1.846 | 0.106075   | 0.321233  |
| 2534 | 10543697 | <a href="#">NM_172735</a>          | <a href="#">232679</a>    | zinc finger, C3HC type 1          | <a href="#">Zc3hc1</a>             | 1.181 | 2.245 | 0.0585402  | 0.222381  |
| 2535 | 10374529 | <a href="#">AF424701</a>           | <a href="#">216560</a>    | expressed sequence AV249152       | <a href="#">AV249152</a>           | 1.181 | 1.403 | 0.202281   | 0.465097  |
| 2536 | 10381939 | <a href="#">NM_181071</a>          | <a href="#">77097</a>     | tetratricopeptide repeat, anky    | <a href="#">Tanc2</a>              | 1.181 | 3.652 | 0.00774617 | 0.0567713 |
| 2537 | 10475226 | <a href="#">ENSMUST00000094652</a> | <a href="#">668880</a>    | START domain containing 9         | <a href="#">Stard9</a>             | 1.181 | 2.588 | 0.0351527  | 0.159397  |
| 2538 | 10395103 | <a href="#">NM_181395</a>          | <a href="#">69675</a>     | peroxidasin homolog (Drosophil    | <a href="#">Pxdn</a>               | 1.181 | 2.274 | 0.0560519  | 0.216314  |
| 2539 | 10429843 | <a href="#">BC024074</a>           | <a href="#">18810</a>     | plectin 1                         | <a href="#">Plec1</a>              | 1.181 | 2.398 | 0.046601   | 0.191881  |
| 2540 | 10393544 | <a href="#">NM_011180</a>          | <a href="#">19157</a>     | pleckstrin homology, Sec7 and     | <a href="#">Pscd1</a>              | 1.181 | 2.878 | 0.0229732  | 0.120323  |
| 2541 | 10348493 | <a href="#">NM_008515</a>          | <a href="#">16978</a>     | leucine rich repeat (in FLII)     | <a href="#">Lrrfp1</a>             | 1.181 | 2.968 | 0.0201752  | 0.110487  |
| 2542 | 10608136 |                                    |                           |                                   |                                    | 1.181 | 1.893 | 0.0990187  | 0.307265  |
| 2543 | 10581289 | <a href="#">NM_013477</a>          | <a href="#">11972</a>     | ATPase, H+ transporting, lysos    | <a href="#">Atp6v0d1</a>           | 1.181 | 2.217 | 0.0610706  | 0.22806   |
| 2544 | 10541895 | <a href="#">NM_011609</a>          | <a href="#">21937</a>     | tumor necrosis factor receptor    | <a href="#">Tnfrsf1a</a>           | 1.181 | 1.983 | 0.08653    | 0.282737  |
| 2545 | 10597518 | <a href="#">NM_099371</a>          | <a href="#">24813</a>     | transforming growth factor, be    | <a href="#">Tgfb2</a>              | 1.181 | 2.577 | 0.0361331  | 0.162182  |
| 2546 | 10550113 | <a href="#">NM_026823</a>          | <a href="#">68724</a>     | ADP-ribosylation factor-like 8    | <a href="#">Arf1a</a>              | 1.181 | 2.052 | 0.0781338  | 0.285956  |
| 2547 | 10513608 | <a href="#">NM_008525</a>          | <a href="#">17025</a>     | aminolevulinate, delta-, dehyd    | <a href="#">Alad</a>               | 1.181 | 1.738 | 0.12458    | 0.35351   |
| 2548 | 10374442 | <a href="#">NM_020558</a>          | <a href="#">57316</a>     | nuclear DNA binding protein       | <a href="#">C1d</a>                | 1.181 | 1.517 | 0.171928   | 0.424079  |
| 2549 | 10413185 | <a href="#">NM_183208</a>          | <a href="#">328365</a>    | zinc finger, MIZ-type containi    | <a href="#">Zmiz1</a>              | 1.18  | 2.603 | 0.034386   | 0.157065  |
| 2550 | 10490682 | <a href="#">BC058179</a>           | <a href="#">72147</a>     | zinc finger and BTB domain con    | <a href="#">Zbtb46</a>             | 1.18  | 3.385 | 0.0111667  | 0.0731438 |
| 2551 | 10387743 | <a href="#">NM_009204</a>          | <a href="#">20528</a>     | solute carrier family 2 (facil    | <a href="#">Slc2a4</a>             | 1.18  | 1.914 | 0.0959276  | 0.301291  |
| 2552 | 10528527 | <a href="#">NM_053090</a>          | <a href="#">84652</a>     | expressed sequence AB030242       | <a href="#">AB030242</a>           | 1.18  | 2.002 | 0.0841879  | 0.278397  |
| 2553 | 10394627 | <a href="#">BC057020</a>           | <a href="#">71169</a>     | RIKEN cDNA 4933425L03 gene        | <a href="#">4933425L03Rik</a>      | 1.18  | 2.27  | 0.0563942  | 0.217076  |
| 2554 | 10601503 | <a href="#">NM_033605</a>          | <a href="#">93837</a>     | dachshund 2 (Drosophila)          | <a href="#">Dach2</a>              | 1.18  | 1.053 | 0.326225   | 0.602683  |
| 2555 | 10556640 | <a href="#">NM_182995</a>          | <a href="#">101565</a>    | RIKEN cDNA 6330503K22<br>gene     | <a href="#">6330503K22Rik</a>      | 1.18  | 1.433 | 0.193819   | 0.453387  |
| 2556 | 10459193 | <a href="#">NM_133249</a>          | <a href="#">170826</a>    | peroxisome proliferative activ    | <a href="#">Ppargc1b</a>           | 1.18  | 3.193 | 0.0146121  | 0.0885774 |
| 2557 | 10413059 | <a href="#">NM_009502</a>          | <a href="#">22330</a>     | vinculin                          | <a href="#">Vcl</a>                | 1.18  | 1.52  | 0.171105   | 0.422843  |
| 2558 | 10457669 | <a href="#">NM_007882</a>          | <a href="#">13507</a>     | desmocollin 3                     | <a href="#">Dsc3</a>               | 1.18  | 1.842 | 0.106733   | 0.32221   |

|      |          |                                    |                           |                                   |                                    |       |       |           |           |
|------|----------|------------------------------------|---------------------------|-----------------------------------|------------------------------------|-------|-------|-----------|-----------|
| 2559 | 10540523 | <a href="#">NM_144799</a>          | <a href="#">30937</a>     | LIM and cysteine-rich domains     | <a href="#">Lmcd1</a>              | 1.18  | 2.119 | 0.0706274 | 0.24939   |
| 2560 | 10578193 | <a href="#">NM_026067</a>          | <a href="#">67276</a>     | three prime histone mRNA<br>exonu | <a href="#">Thex1</a>              | 1.179 | 1.803 | 0.113157  | 0.333338  |
| 2561 | 10364402 | <a href="#">NM_009200</a>          | <a href="#">20513</a>     | solute carrier family 1 (high     | <a href="#">Slc1a6</a>             | 1.179 | 2.613 | 0.0338861 | 0.155555  |
| 2562 | 10442112 | <a href="#">NM_001104542</a>       | <a href="#">627132</a>    | vomeronal 2, receptor 93          | <a href="#">Vmn2r93</a>            | 1.179 | 1.729 | 0.126159  | 0.355658  |
| 2563 | 10595560 | <a href="#">NM_023814</a>          | <a href="#">76365</a>     | T-box18                           | <a href="#">Tbx18</a>              | 1.179 | 3.303 | 0.0125175 | 0.079148  |
| 2564 | 10499536 | <a href="#">NM_010107</a>          | <a href="#">13636</a>     | ephrin A1                         | <a href="#">Efna1</a>              | 1.179 | 1.725 | 0.126966  | 0.356991  |
| 2565 | 10546812 | <a href="#">ENSMUST00000053559</a> | <a href="#">319831</a>    | RIKEN cDNA 5031434C07<br>gene     | <a href="#">5031434C07Rik</a>      | 1.179 | 2.474 | 0.0415991 | 0.177907  |
| 2566 | 10599463 | <a href="#">NM_133213</a>          | <a href="#">170745</a>    | X-prolyl aminopeptidase (amino    | <a href="#">Xpnpep2</a>            | 1.179 | 2.706 | 0.0295368 | 0.142003  |
| 2567 | 10522430 | <a href="#">NM_178896</a>          | <a href="#">100737</a>    | DCN1, defective in cullin nedd    | <a href="#">Dcun1d4</a>            | 1.179 | 2.512 | 0.0393388 | 0.172069  |
| 2568 | 10473809 | <a href="#">NM_011355</a>          | <a href="#">20375</a>     | SFFV proviral integration 1       | <a href="#">Sfp1</a>               | 1.179 | 2.879 | 0.0229278 | 0.120261  |
| 2569 | 10601235 | <a href="#">NM_139144</a>          | <a href="#">108155</a>    | O-linked N-acetylglucosamine (    | <a href="#">Ogt</a>                | 1.179 | 2.382 | 0.0477342 | 0.194806  |
| 2570 | 10434942 | <a href="#">NM_007862</a>          | <a href="#">13383</a>     | discs, large homolog 1 (Drosop    | <a href="#">Dlg1</a>               | 1.179 | 2.261 | 0.0571273 | 0.218625  |
| 2571 | 10472970 | <a href="#">NM_010469</a>          | <a href="#">15436</a>     | homeo box D4                      | <a href="#">Hoxd4</a>              | 1.179 | 1.84  | 0.107134  | 0.322599  |
| 2572 | 10607467 | <a href="#">NM_009121</a>          | <a href="#">20229</a>     | spermidine/spermine N1-acetyl     | <a href="#">Sat1</a>               | 1.179 | 1.401 | 0.202685  | 0.465349  |
| 2573 | 10556350 | <a href="#">NM_133758</a>          | <a href="#">74996</a>     | ubiquitin specific peptidase 4    | <a href="#">Usp47</a>              | 1.179 | 2.805 | 0.0255317 | 0.129273  |
| 2574 | 10360806 | <a href="#">NM_009794</a>          | <a href="#">12334</a>     | calpain 2                         | <a href="#">Capn2</a>              | 1.179 | 2.213 | 0.0613664 | 0.228633  |
| 2575 | 10360415 | <a href="#">NM_011825</a>          | <a href="#">23893</a>     | gremlin 2 homolog, cysteine kn    | <a href="#">Grem2</a>              | 1.179 | 0.749 | 0.477642  | 0.728348  |
| 2576 | 10551181 | <a href="#">NM_172148</a>          | <a href="#">232987</a>    | B9 protein domain 2               | <a href="#">B9d2</a>               | 1.179 | 2.305 | 0.053537  | 0.209868  |
| 2577 | 10584762 | <a href="#">NM_030256</a>          | <a href="#">80288</a>     | B-cell CLL/lymphoma 9-like        | <a href="#">Bcl9l</a>              | 1.179 | 3.268 | 0.0131458 | 0.0822352 |
| 2578 | 10388377 | <a href="#">NM_013761</a>          | <a href="#">27364</a>     | serine racemase                   | <a href="#">Srr</a>                | 1.179 | 1.989 | 0.0857593 | 0.281088  |
| 2579 | 10581605 | <a href="#">NM_017370</a>          | <a href="#">15439</a>     | haptoglobin                       | <a href="#">Hp</a>                 | 1.179 | 2.076 | 0.0754091 | 0.259639  |
| 2580 | 10378523 | <a href="#">NM_001002764</a>       | <a href="#">103677</a>    | Smg-6 homolog, nonsense<br>mediat | <a href="#">Smg6</a>               | 1.179 | 2.477 | 0.0414051 | 0.177544  |
| 2581 | 10361381 | <a href="#">NM_001079686</a>       | <a href="#">64009</a>     | synaptic nuclear envelope 1       | <a href="#">Syne1</a>              | 1.179 | 2.499 | 0.0401183 | 0.174258  |
| 2582 | 10474064 | <a href="#">NM_001025246</a>       | <a href="#">277414</a>    | transformation related protein    | <a href="#">Trp53i11</a>           | 1.179 | 2.248 | 0.0582536 | 0.221691  |
| 2583 | 10427606 | <a href="#">NM_145468</a>          | <a href="#">27401</a>     | S-phase kinase-associated prot    | <a href="#">Skp2</a>               | 1.179 | 2.196 | 0.0630152 | 0.232692  |
| 2584 | 10604585 |                                    |                           |                                   |                                    | 1.178 | 1.632 | 0.145522  | 0.387083  |
| 2585 | 10494945 | <a href="#">NM_018800</a>          | <a href="#">54524</a>     | synaptotagmin VI                  | <a href="#">Syt6</a>               | 1.178 | 2.413 | 0.0455528 | 0.18882   |
| 2586 | 10440427 | <a href="#">NM_025967</a>          | <a href="#">67102</a>     | DNA segment, Chr 16, ERATO<br>Doi | <a href="#">D16Ert472e</a>         | 1.178 | 2.463 | 0.0422884 | 0.179955  |
| 2587 | 10408490 | <a href="#">NM_025588</a>          | <a href="#">66482</a>     | exocyst complex component 2       | <a href="#">Exoc2</a>              | 1.178 | 1.641 | 0.143543  | 0.384139  |
| 2588 | 10471550 | <a href="#">ENSMUST00000043703</a> | <a href="#">269261</a>    | ribosomal protein L12             | <a href="#">Rpl12</a>              | 1.178 | 2.456 | 0.0427038 | 0.181093  |
| 2589 | 10598491 | <a href="#">ENSMUST00000086274</a> | <a href="#">100038473</a> | predicted gene,<br>ENSMUSG0000007 | <a href="#">ENSMUSG00000073290</a> | 1.178 | 0.309 | 0.766109  | 0.902642  |
| 2590 | 10524621 | <a href="#">NM_011854</a>          | <a href="#">23962</a>     | 2'-5' oligoadenylate synthetas    | <a href="#">Oasl2</a>              | 1.178 | 2.312 | 0.0529749 | 0.208585  |
| 2591 | 10356423 | <a href="#">NM_001033291</a>       | <a href="#">227334</a>    | ubiquitin specific peptidase 4    | <a href="#">Usp40</a>              | 1.178 | 3.229 | 0.0138985 | 0.0854991 |
| 2592 | 10383867 | <a href="#">NM_028860</a>          | <a href="#">74302</a>     | myotubularin related protein 3    | <a href="#">Mtmr3</a>              | 1.178 | 1.86  | 0.103897  | 0.316907  |
| 2593 | 10468159 | <a href="#">NM_010697</a>          | <a href="#">16825</a>     | LIM domain binding 1              | <a href="#">Ldb1</a>               | 1.178 | 2.316 | 0.0526202 | 0.207614  |
| 2594 | 10545233 | <a href="#">BC094049</a>           | <a href="#">100101480</a> | predicted gene,<br>ENSMUSG0000007 | <a href="#">ENSMUSG00000076577</a> | 1.178 | 1.598 | 0.15292   | 0.396925  |
| 2595 | 10528484 | <a href="#">NM_009274</a>          | <a href="#">20817</a>     | serine/arginine-rich protein s    | <a href="#">Srpk2</a>              | 1.178 | 2.972 | 0.0200366 | 0.109926  |
| 2596 | 10399032 |                                    |                           |                                   |                                    | 1.178 | 0.982 | 0.358077  | 0.630354  |
| 2597 | 10388545 | <a href="#">NM_198895</a>          | <a href="#">109934</a>    | active BCR-related gene           | <a href="#">Abr</a>                | 1.178 | 2.196 | 0.0629702 | 0.232607  |
| 2598 | 10477140 | <a href="#">NM_009047</a>          | <a href="#">19700</a>     | rad and gem related GTP bindin    | <a href="#">Rem1</a>               | 1.177 | 3.308 | 0.0124236 | 0.0786715 |
| 2599 | 10407387 | <a href="#">BC021422</a>           | <a href="#">633640</a>    | predicted gene, EG633640          | <a href="#">EG633640</a>           | 1.177 | 2.1   | 0.0727534 | 0.254264  |
| 2600 | 10482200 | <a href="#">NM_146122</a>          | <a href="#">227801</a>    | DENN/MADD domain<br>containing 1A | <a href="#">Dennd1a</a>            | 1.177 | 3.369 | 0.0114163 | 0.0742122 |
| 2601 | 10498647 | <a href="#">NM_020026</a>          | <a href="#">26879</a>     | UDP-GalNAc:betaGlcNAc beta<br>1,3 | <a href="#">B3galnt1</a>           | 1.177 | 1.466 | 0.184724  | 0.442299  |
| 2602 | 10346109 | <a href="#">ENSMUST00000069293</a> | <a href="#">227058</a>    | dynein, axonemal, heavy chain     | <a href="#">Dnahc7b</a>            | 1.177 | 2.146 | 0.0678461 | 0.243316  |
| 2603 | 10468653 | <a href="#">NM_170757</a>          | <a href="#">213993</a>    | RIKEN cDNA A630007B06<br>gene     | <a href="#">A630007B06Rik</a>      | 1.177 | 2.243 | 0.0587444 | 0.222957  |
| 2604 | 10464529 | <a href="#">NM_016921</a>          | <a href="#">27060</a>     | T-cell, immune regulator 1, AT    | <a href="#">Teirg1</a>             | 1.177 | 2.919 | 0.0216448 | 0.115512  |
| 2605 | 10603099 | <a href="#">NM_010216</a>          | <a href="#">14205</a>     | c-fos induced growth factor       | <a href="#">Figf</a>               | 1.177 | 1.242 | 0.253012  | 0.52727   |
| 2606 | 10558410 | <a href="#">NM_011212</a>          | <a href="#">19267</a>     | protein tyrosine phosphatase,     | <a href="#">Ptpre</a>              | 1.177 | 1.895 | 0.098774  | 0.306809  |
| 2607 | 10513381 | <a href="#">NM_144904</a>          | <a href="#">230257</a>    | ROD1 regulator of differentiat    | <a href="#">Rod1</a>               | 1.177 | 2.062 | 0.0770074 | 0.263172  |
| 2608 | 10496262 | <a href="#">NM_178877</a>          | <a href="#">97086</a>     | Na+/H+ exchanger domain<br>contai | <a href="#">Nhdc2</a>              | 1.177 | 2.321 | 0.0522423 | 0.206719  |

|      |          |                                    |                        |                                |                               |       |       |            |           |
|------|----------|------------------------------------|------------------------|--------------------------------|-------------------------------|-------|-------|------------|-----------|
| 2609 | 10507032 | <a href="#">NM_026279</a>          | <a href="#">67621</a>  | RIKEN cDNA 2310026E23 gene     | <a href="#">2310026E23Rik</a> | 1.177 | 2.253 | 0.0578741  | 0.220644  |
| 2610 | 10471929 | <a href="#">NM_153820</a>          | <a href="#">76117</a>  | Rho GTPase activating protein  | <a href="#">Arhgap15</a>      | 1.176 | 2.602 | 0.0343959  | 0.157065  |
| 2611 | 10436471 | <a href="#">NM_178647</a>          | <a href="#">106143</a> | CGG triplet repeat binding pro | <a href="#">Cggbp1</a>        | 1.176 | 3.046 | 0.0180306  | 0.102072  |
| 2612 | 10591618 | <a href="#">NM_177030</a>          | <a href="#">319899</a> | dedicator of cytokinesis 6     | <a href="#">Dock6</a>         | 1.176 | 2.211 | 0.0616296  | 0.22935   |
| 2613 | 10513774 |                                    |                        |                                |                               | 1.176 | 1.59  | 0.154578   | 0.399756  |
| 2614 | 10551770 | <a href="#">NM_013705</a>          | <a href="#">22693</a>  | zinc finger protein 30         | <a href="#">Zfp30</a>         | 1.176 | 2.432 | 0.0442979  | 0.185761  |
| 2615 | 10425749 | <a href="#">BC116256</a>           | <a href="#">338368</a> | RIKEN cDNA C920005C14 gene     | <a href="#">C920005C14Rik</a> | 1.176 | 2.514 | 0.0392247  | 0.171818  |
| 2616 | 10602925 | <a href="#">NM_172783</a>          | <a href="#">110094</a> | phosphorylase kinase alpha 2   | <a href="#">Phka2</a>         | 1.176 | 2.834 | 0.024501   | 0.12574   |
| 2617 | 10407370 | <a href="#">NM_001113550</a>       | <a href="#">67392</a>  | RIKEN cDNA 4833420G17 gene     | <a href="#">4833420G17Rik</a> | 1.176 | 2.18  | 0.0645034  | 0.23633   |
| 2618 | 10437160 | <a href="#">NM_011809</a>          | <a href="#">23872</a>  | E26 avian leukemia oncogene 2, | <a href="#">Ets2</a>          | 1.176 | 1.209 | 0.264717   | 0.539955  |
| 2619 | 10534596 | <a href="#">NM_009986</a>          | <a href="#">13047</a>  | cut-like homeobox 1            | <a href="#">Cux1</a>          | 1.176 | 2.949 | 0.0207242  | 0.112646  |
| 2620 | 10605797 | <a href="#">NM_001033329</a>       | <a href="#">236915</a> | Cdc42 guanine nucleotide excha | <a href="#">Arhgef9</a>       | 1.176 | 2.372 | 0.0484552  | 0.196802  |
| 2621 | 10438572 | <a href="#">BC072629</a>           | <a href="#">72190</a>  | RIKEN cDNA 2510009E07 gene     | <a href="#">2510009E07Rik</a> | 1.176 | 2.131 | 0.0693729  | 0.246733  |
| 2622 | 10599773 | <a href="#">ENSMUST00000066533</a> | <a href="#">236798</a> | G protein-coupled receptor 112 | <a href="#">Gpr112</a>        | 1.175 | 3.41  | 0.0107787  | 0.071533  |
| 2623 | 10405163 | <a href="#">NM_011462</a>          | <a href="#">20729</a>  | spindlin 1                     | <a href="#">Spin1</a>         | 1.175 | 3.558 | 0.0087987  | 0.0620132 |
| 2624 | 10533659 | <a href="#">NM_019765</a>          | <a href="#">56430</a>  | CAP-GLY domain containing link | <a href="#">Clip1</a>         | 1.175 | 2.386 | 0.0474175  | 0.193793  |
| 2625 | 10386086 | <a href="#">NM_153079</a>          | <a href="#">216749</a> | neuromedin U receptor 2        | <a href="#">Nmur2</a>         | 1.175 | 1.476 | 0.182346   | 0.438828  |
| 2626 | 10451838 | <a href="#">NM_022025</a>          | <a href="#">63993</a>  | solute carrier family 5 (choli | <a href="#">Slc5a7</a>        | 1.175 | 1.368 | 0.212356   | 0.477959  |
| 2627 | 10406859 | <a href="#">NM_001004149</a>       | <a href="#">238803</a> | zinc finger protein 366        | <a href="#">Zfp366</a>        | 1.175 | 2.279 | 0.0556662  | 0.215398  |
| 2628 | 10598976 | <a href="#">NM_001044384</a>       | <a href="#">21857</a>  | tissue inhibitor of metallopro | <a href="#">Timp1</a>         | 1.175 | 2.146 | 0.067867   | 0.243316  |
| 2629 | 10428763 | <a href="#">NM_027435</a>          | <a href="#">70472</a>  | ATPase family, AAA domain cont | <a href="#">Atad2</a>         | 1.175 | 2.979 | 0.0198487  | 0.109321  |
| 2630 | 10496656 | <a href="#">NM_027770</a>          | <a href="#">71355</a>  | collagen, type XXIV, alpha 1   | <a href="#">Col24a1</a>       | 1.175 | 4.037 | 0.00465506 | 0.0391358 |
| 2631 | 10503654 |                                    |                        |                                |                               | 1.175 | 1.737 | 0.124746   | 0.353522  |
| 2632 | 10391828 | <a href="#">NM_011795</a>          | <a href="#">23829</a>  | complement component 1, q subc | <a href="#">C1q1</a>          | 1.175 | 1.629 | 0.146178   | 0.387985  |
| 2633 | 10605828 | <a href="#">ENSMUST00000096366</a> | <a href="#">76386</a>  | RIKEN cDNA 1700010D01 gene     | <a href="#">1700010D01Rik</a> | 1.175 | 1.16  | 0.28302    | 0.55833   |
| 2634 | 10353475 | <a href="#">NM_145380</a>          | <a href="#">98221</a>  | eukaryotic translation initiat | <a href="#">Eif3m</a>         | 1.174 | 2.657 | 0.0317277  | 0.149088  |
| 2635 | 10508805 | <a href="#">NM_153423</a>          | <a href="#">242687</a> | WAS protein family, member 2   | <a href="#">Wasf2</a>         | 1.174 | 2.511 | 0.0393582  | 0.172118  |
| 2636 | 10552303 | <a href="#">NM_001033782</a>       | <a href="#">434172</a> | predicted gene, EG434172       | <a href="#">EG434172</a>      | 1.174 | 2.22  | 0.0607887  | 0.22757   |
| 2637 | 10477991 |                                    |                        |                                |                               | 1.174 | 1.894 | 0.0987873  | 0.306809  |
| 2638 | 10536407 | <a href="#">NM_029404</a>          | <a href="#">75725</a>  | PHD finger protein 14          | <a href="#">Phf14</a>         | 1.174 | 3.087 | 0.017      | 0.098344  |
| 2639 | 10388954 | <a href="#">NM_019409</a>          | <a href="#">18377</a>  | oligodendrocyte myelin glycopr | <a href="#">Omg</a>           | 1.174 | 1.576 | 0.157669   | 0.404484  |
| 2640 | 10606609 | <a href="#">NM_019656</a>          | <a href="#">56496</a>  | tetraspanin 6                  | <a href="#">Tspan6</a>        | 1.174 | 1.946 | 0.0914425  | 0.292815  |
| 2641 | 10495083 | <a href="#">NM_001039347</a>       | <a href="#">56543</a>  | potassium voltage-gated channe | <a href="#">Kend3</a>         | 1.174 | 0.795 | 0.451994   | 0.708815  |
| 2642 | 10558333 | <a href="#">NM_025850</a>          | <a href="#">66930</a>  | fibronectin type 3 and ankyrin | <a href="#">Fank1</a>         | 1.174 | 1.919 | 0.0952348  | 0.299917  |
| 2643 | 10362941 | <a href="#">NM_011156</a>          | <a href="#">19072</a>  | prolyl endopeptidase           | <a href="#">Prep</a>          | 1.174 | 2.025 | 0.0812884  | 0.272042  |
| 2644 | 10412624 | <a href="#">NM_178279</a>          | <a href="#">218699</a> | PX domain containing serine/th | <a href="#">Pxx</a>           | 1.174 | 1.444 | 0.190718   | 0.449693  |
| 2645 | 10429083 | <a href="#">NM_152923</a>          | <a href="#">110862</a> | potassium voltage-gated channe | <a href="#">Kenq3</a>         | 1.174 | 2.973 | 0.0200215  | 0.109926  |
| 2646 | 10544746 | <a href="#">NM_010449</a>          | <a href="#">15394</a>  | homeo box A1                   | <a href="#">Hoxa1</a>         | 1.174 | 2.414 | 0.0455119  | 0.18878   |
| 2647 | 10456400 | <a href="#">NM_026473</a>          | <a href="#">67951</a>  | tubulin, beta 6                | <a href="#">Tubb6</a>         | 1.173 | 1.682 | 0.135273   | 0.370739  |
| 2648 | 10407481 | <a href="#">NM_019703</a>          | <a href="#">56421</a>  | phosphofructokinase, platelet  | <a href="#">Pfkp</a>          | 1.173 | 2.17  | 0.0654531  | 0.238533  |
| 2649 | 10542677 | <a href="#">AK031560</a>           | <a href="#">75320</a>  | ethanolamine kinase 1          | <a href="#">Etk1</a>          | 1.173 | 2.731 | 0.0284567  | 0.138479  |
| 2650 | 10499091 | <a href="#">NM_001040461</a>       | <a href="#">654362</a> | dual endothelin 1/angiotensin  | <a href="#">Dear1</a>         | 1.173 | 2.91  | 0.0219326  | 0.11646   |
| 2651 | 10600707 | <a href="#">NM_007430</a>          | <a href="#">11614</a>  | nuclear receptor subfamily 0,  | <a href="#">Nr0b1</a>         | 1.173 | 1.516 | 0.171993   | 0.424096  |
| 2652 | 10586306 | <a href="#">NM_020043</a>          | <a href="#">56741</a>  | neighbor of Punc E11           | <a href="#">Nope</a>          | 1.173 | 3.047 | 0.0179892  | 0.101919  |
| 2653 | 10443479 |                                    |                        |                                |                               | 1.173 | 2.912 | 0.0218757  | 0.116333  |
| 2654 | 10417167 | <a href="#">NM_029556</a>          | <a href="#">69634</a>  | citrate lyase beta like        | <a href="#">Clybl</a>         | 1.173 | 1.246 | 0.251648   | 0.525573  |
| 2655 | 10488652 | <a href="#">NM_001039122</a>       | <a href="#">654459</a> | defensin beta 25               | <a href="#">Defb25</a>        | 1.173 | 1.62  | 0.147901   | 0.390122  |
| 2656 | 10397575 | <a href="#">NM_172544</a>          | <a href="#">18191</a>  | neurexin III                   | <a href="#">Nrxn3</a>         | 1.173 | 3.018 | 0.0187688  | 0.105129  |
| 2657 | 10393594 | <a href="#">NM_001039167</a>       | <a href="#">52897</a>  | DNA segment, Chr 11, Brigham & | <a href="#">D11Bwg0517e</a>   | 1.173 | 3.775 | 0.00656415 | 0.0501236 |
| 2658 | 10553644 |                                    |                        |                                |                               | 1.173 | 2.408 | 0.0458957  | 0.189906  |
| 2659 | 10600235 | <a href="#">NM_007435</a>          | <a href="#">11666</a>  | ATP-binding cassette, sub-fami | <a href="#">Abcd1</a>         | 1.172 | 3.336 | 0.0119487  | 0.0765816 |

|      |          |                                    |                        |                                |                               |       |       |           |           |
|------|----------|------------------------------------|------------------------|--------------------------------|-------------------------------|-------|-------|-----------|-----------|
| 2660 | 10471571 | <a href="#">NM_177345</a>          | <a href="#">227743</a> | mitogen-activated protein kina | <a href="#">Mapkap1</a>       | 1.172 | 2.66  | 0.0315968 | 0.148727  |
| 2661 | 10515943 | <a href="#">NM_016748</a>          | <a href="#">51797</a>  | cytidine 5'-triphosphate synth | <a href="#">Ctps</a>          | 1.172 | 1.969 | 0.088404  | 0.286601  |
| 2662 | 10394245 | <a href="#">NM_153082</a>          | <a href="#">217378</a> | rab and DnaJ domain containing | <a href="#">Rbj</a>           | 1.172 | 2.94  | 0.0209843 | 0.113389  |
| 2663 | 10472034 | <a href="#">NM_177139</a>          | <a href="#">320343</a> | LY6/PLAUR domain containing 6  | <a href="#">Lypd6</a>         | 1.172 | 1.116 | 0.300043  | 0.576161  |
| 2664 | 10485674 | <a href="#">NM_173750</a>          | <a href="#">212772</a> | RIKEN cDNA 2700007P21 gene     | <a href="#">2700007P21Rik</a> | 1.172 | 1.994 | 0.0851259 | 0.280271  |
| 2665 | 10424700 | <a href="#">NM_011759</a>          | <a href="#">22701</a>  | zinc finger protein 41         | <a href="#">Zfp41</a>         | 1.172 | 3.066 | 0.0175202 | 0.100079  |
| 2666 | 10539263 | <a href="#">NM_013586</a>          | <a href="#">16950</a>  | lysyl oxidase-like 3           | <a href="#">Loxl3</a>         | 1.172 | 1.661 | 0.139375  | 0.377524  |
| 2667 | 10527051 | <a href="#">NM_177879</a>          | <a href="#">330222</a> | sidekick homolog 1 (chicken)   | <a href="#">Sdk1</a>          | 1.171 | 1.715 | 0.128816  | 0.360038  |
| 2668 | 10538482 | <a href="#">NM_007407</a>          | <a href="#">11517</a>  | adenylate cyclase activating p | <a href="#">Adcyap1rl</a>     | 1.171 | 2.735 | 0.0282785 | 0.137931  |
| 2669 | 10573731 | <a href="#">ENSMUST00000074808</a> | <a href="#">77265</a>  | RIKEN cDNA 9430002A10 gene     | <a href="#">9430002A10Rik</a> | 1.171 | 2.73  | 0.0285181 | 0.138554  |
| 2670 | 10561055 | <a href="#">NM_001113368</a>       | <a href="#">26367</a>  | CEA-related cell adhesion mole | <a href="#">Ceacam2</a>       | 1.171 | 0.96  | 0.368321  | 0.639181  |
| 2671 | 10550263 | <a href="#">NM_148946</a>          | <a href="#">110891</a> | solute carrier family 8 (sodiu | <a href="#">Slc8a2</a>        | 1.171 | 1.726 | 0.126799  | 0.356711  |
| 2672 | 10533781 | <a href="#">NM_001081323</a>       | <a href="#">269702</a> | M-phase phosphoprotein 9       | <a href="#">Mphosph9</a>      | 1.171 | 2.922 | 0.0215321 | 0.114997  |
| 2673 | 10457489 | <a href="#">BC094382</a>           | <a href="#">338363</a> | RIKEN cDNA 6030446N20 gene     | <a href="#">6030446N20Rik</a> | 1.171 | 1.804 | 0.112926  | 0.332876  |
| 2674 | 10532767 | <a href="#">NM_198109</a>          | <a href="#">231637</a> | slingshot homolog 1 (Drosophil | <a href="#">Ssh1</a>          | 1.171 | 2.272 | 0.0561961 | 0.216668  |
| 2675 | 10565519 | <a href="#">NM_026734</a>          | <a href="#">68472</a>  | transmembrane protein 126B     | <a href="#">Tmem126b</a>      | 1.171 | 1.649 | 0.141974  | 0.381774  |
| 2676 | 10434313 | <a href="#">NM_001033237</a>       | <a href="#">208146</a> | YEATS domain containing 2      | <a href="#">Yeats2</a>        | 1.171 | 2.566 | 0.036302  | 0.162739  |
| 2677 | 10558441 | <a href="#">NM_008598</a>          | <a href="#">17314</a>  | O-6-methylguanine-DNA methyltr | <a href="#">Mgmt</a>          | 1.17  | 1.926 | 0.09429   | 0.298038  |
| 2678 | 10363528 | <a href="#">NM_001039194</a>       | <a href="#">71361</a>  | apoptosis-inducing factor, mit | <a href="#">Aifm2</a>         | 1.17  | 2.667 | 0.0312622 | 0.147777  |
| 2679 | 10515735 | <a href="#">ENSMUST00000075406</a> | <a href="#">230676</a> | cDNA sequence BC059842         | <a href="#">BC059842</a>      | 1.17  | 1.513 | 0.172702  | 0.425051  |
| 2680 | 10583586 | <a href="#">NM_152808</a>          | <a href="#">68682</a>  | solute carrier family 44, memb | <a href="#">Slc44a2</a>       | 1.17  | 1.083 | 0.313853  | 0.590663  |
| 2681 | 10566296 | <a href="#">NM_146329</a>          | <a href="#">258326</a> | olfactory receptor 642         | <a href="#">Olfr642</a>       | 1.17  | 2.333 | 0.0513627 | 0.204715  |
| 2682 | 10359624 | <a href="#">NM_175686</a>          | <a href="#">18933</a>  | paired related homeobox 1      | <a href="#">Prrx1</a>         | 1.17  | 0.414 | 0.690955  | 0.864447  |
| 2683 | 10398727 | <a href="#">NM_001025360</a>       | <a href="#">16593</a>  | kinesin light chain 1          | <a href="#">Klc1</a>          | 1.17  | 2.255 | 0.0576836 | 0.220155  |
| 2684 | 10544687 | <a href="#">NM_007808</a>          | <a href="#">13063</a>  | cytochrome c, somatic          | <a href="#">Cycs</a>          | 1.17  | 0.812 | 0.44268   | 0.701385  |
| 2685 | 10483264 | <a href="#">NM_001047604</a>       | <a href="#">73668</a>  | tetratricopeptide repeat domai | <a href="#">Ttc21b</a>        | 1.17  | 2.46  | 0.0425076 | 0.180696  |
| 2686 | 10430851 | <a href="#">NM_019823</a>          | <a href="#">56448</a>  | cytochrome P450, family 2, sub | <a href="#">Cyp2d22</a>       | 1.17  | 1.791 | 0.115122  | 0.337402  |
| 2687 | 10570621 | <a href="#">NM_013756</a>          | <a href="#">27358</a>  | defensin beta 3                | <a href="#">Defb3</a>         | 1.169 | 3.392 | 0.0110522 | 0.0726868 |
| 2688 | 10567851 | <a href="#">NM_010900</a>          | <a href="#">18020</a>  | nuclear factor of activated T- | <a href="#">Nfatc2ip</a>      | 1.169 | 1.526 | 0.16971   | 0.421019  |
| 2689 | 10566346 | <a href="#">NM_175677</a>          | <a href="#">319236</a> | RIKEN cDNA 9230105E10 gene     | <a href="#">9230105E10Rik</a> | 1.169 | 0.782 | 0.459329  | 0.714207  |
| 2690 | 10378013 | <a href="#">NM_027186</a>          | <a href="#">69723</a>  | RPA interacting protein        | <a href="#">Rpain</a>         | 1.169 | 2.002 | 0.0842041 | 0.278407  |
| 2691 | 10502284 | <a href="#">NM_001040400</a>       | <a href="#">214133</a> | tet oncogene family member 2   | <a href="#">Tet2</a>          | 1.169 | 2.237 | 0.0592488 | 0.224067  |
| 2692 | 10565958 | <a href="#">NM_183168</a>          | <a href="#">233571</a> | pyrimidinergic receptor P2Y, G | <a href="#">P2ry6</a>         | 1.169 | 1.134 | 0.293264  | 0.569401  |
| 2693 | 10530536 | <a href="#">NM_001113460</a>       | <a href="#">21682</a>  | cytoplasmic tyrosine kinase, D | <a href="#">Tec</a>           | 1.169 | 0.671 | 0.523026  | 0.759642  |
| 2694 | 10346747 | <a href="#">NM_030013</a>          | <a href="#">77951</a>  | cytochrome P450, family 20, su | <a href="#">Cyp20a1</a>       | 1.169 | 1.831 | 0.108588  | 0.325441  |
| 2695 | 10390560 | <a href="#">NM_146028</a>          | <a href="#">217154</a> | SH3 and cysteine rich domain 2 | <a href="#">Stac2</a>         | 1.169 | 3.099 | 0.0167083 | 0.0972956 |
| 2696 | 10439955 | <a href="#">ENSMUST00000099705</a> | <a href="#">385658</a> | gene model 1752, (NCBI)        | <a href="#">Gm1752</a>        | 1.169 | 2.501 | 0.0399565 | 0.173817  |
| 2697 | 10561052 |                                    |                        |                                |                               | 1.169 | 1.754 | 0.121577  | 0.34818   |
| 2698 | 10521863 | <a href="#">NM_024213</a>          | <a href="#">52206</a>  | anaphase promoting complex sub | <a href="#">Anapc4</a>        | 1.169 | 1.645 | 0.142757  | 0.382897  |
| 2699 | 10516305 | <a href="#">NM_144941</a>          | <a href="#">245877</a> | microtubule-associated protein | <a href="#">Mtap7d1</a>       | 1.169 | 2.872 | 0.0231544 | 0.120967  |
| 2700 | 10457168 | <a href="#">NM_178687</a>          | <a href="#">225825</a> | CD226 antigen                  | <a href="#">Cd226</a>         | 1.169 | 2.269 | 0.0564617 | 0.217193  |
| 2701 | 10556067 | <a href="#">NM_021889</a>          | <a href="#">60510</a>  | synaptotagmin IX               | <a href="#">Syr9</a>          | 1.169 | 2.617 | 0.0336809 | 0.154849  |
| 2702 | 10352957 | <a href="#">NM_021374</a>          | <a href="#">58175</a>  | regulator of G-protein signali | <a href="#">Rgs20</a>         | 1.168 | 2.232 | 0.0596883 | 0.225162  |
| 2703 | 10389222 | <a href="#">NM_009139</a>          | <a href="#">20305</a>  | chemokine (C-C motif) ligand 6 | <a href="#">Ccl6</a>          | 1.168 | 2.253 | 0.057816  | 0.220581  |
| 2704 | 10560818 | <a href="#">NM_019940</a>          | <a href="#">56707</a>  | zinc finger protein 111        | <a href="#">Zfp111</a>        | 1.168 | 1.977 | 0.0873142 | 0.284457  |
| 2705 | 10355147 | <a href="#">BC026952</a>           | <a href="#">67099</a>  | RIKEN cDNA 2310038H17 gene     | <a href="#">2310038H17Rik</a> | 1.168 | 2.202 | 0.0624393 | 0.231292  |
| 2706 | 10367960 | <a href="#">NM_019961</a>          | <a href="#">56535</a>  | peroxisomal biogenesis factor  | <a href="#">Pex3</a>          | 1.168 | 1.127 | 0.295701  | 0.572101  |
| 2707 | 10443449 | <a href="#">NM_025888</a>          | <a href="#">66989</a>  | potassium channel tetramerisat | <a href="#">Kctd20</a>        | 1.168 | 2.805 | 0.0255274 | 0.129273  |
| 2708 | 10532150 | <a href="#">BC116683</a>           | <a href="#">67266</a>  | RIKEN cDNA 2900024C23 gene     | <a href="#">2900024C23Rik</a> | 1.168 | 2.293 | 0.0544671 | 0.212482  |
| 2709 | 10560292 |                                    |                        |                                |                               | 1.168 | 1.347 | 0.218622  | 0.486788  |
| 2710 | 10346365 | <a href="#">NM_199007</a>          | <a href="#">68549</a>  | shugoshin-like 2 (S. pombe)    | <a href="#">Sgol2</a>         | 1.168 | 3.261 | 0.0132716 | 0.0827874 |

|      |          |                                    |                        |                                                       |                                    |       |       |            |           |
|------|----------|------------------------------------|------------------------|-------------------------------------------------------|------------------------------------|-------|-------|------------|-----------|
| 2711 | 10508500 | <a href="#">NM_173071</a>          | <a href="#">230775</a> | brain-specific angiogenesis in                        | <a href="#">Bar2</a>               | 1.168 | 2.664 | 0.0314266  | 0.148244  |
| 2712 | 10558001 | <a href="#">NM_178641</a>          | <a href="#">101490</a> | inositol polyphosphate-5-phosp                        | <a href="#">Inpp5f</a>             | 1.168 | 1.951 | 0.0908825  | 0.291551  |
| 2713 | 10502081 | <a href="#">NM_007934</a>          | <a href="#">13809</a>  | glutamyl aminopeptidase                               | <a href="#">Enpep</a>              | 1.168 | 1.215 | 0.262518   | 0.536954  |
| 2714 | 10593832 |                                    |                        |                                                       |                                    | 1.167 | 0.252 | 0.807735   | 0.922567  |
| 2715 | 10554063 | <a href="#">NM_001033877</a>       | <a href="#">233332</a> | a disintegrin-like and metallo                        | <a href="#">Adamts17</a>           | 1.167 | 2.429 | 0.0445101  | 0.186509  |
| 2716 | 10396146 | <a href="#">ENSMUST00000070468</a> | <a href="#">791312</a> | predicted gene,                                       | <a href="#">ENSMUSG00000056391</a> | 1.167 | 2.582 | 0.0354343  | 0.16033   |
| 2717 | 10389606 | <a href="#">NM_175563</a>          | <a href="#">270906</a> | <a href="#">ENSMUSG00000056391</a><br>proline rich 11 | <a href="#">Prr11</a>              | 1.167 | 1.333 | 0.223104   | 0.49298   |
| 2718 | 10436727 | <a href="#">AY033899</a>           | <a href="#">224419</a> | open reading frame 63                                 | <a href="#">ORF63</a>              | 1.167 | 1.961 | 0.0894189  | 0.288564  |
| 2719 | 10367775 | <a href="#">NM_001081344</a>       | <a href="#">78808</a>  | syntaxin binding protein 5 (to                        | <a href="#">Stxbp5</a>             | 1.167 | 1.424 | 0.196288   | 0.45671   |
| 2720 | 10464688 | <a href="#">NM_026720</a>          | <a href="#">68423</a>  | ankyrin repeat domain 13 famil                        | <a href="#">Ankrd13d</a>           | 1.167 | 2.995 | 0.0194007  | 0.107469  |
| 2721 | 10455912 | <a href="#">NM_025478</a>          | <a href="#">66307</a>  | isochorismatase domain contain                        | <a href="#">Isoc1</a>              | 1.167 | 1.676 | 0.136465   | 0.372893  |
| 2722 | 10446928 | <a href="#">NM_019919</a>          | <a href="#">268977</a> | latent transforming growth fac                        | <a href="#">Ltbp1</a>              | 1.167 | 1.003 | 0.348197   | 0.622132  |
| 2723 | 10539111 | <a href="#">NM_144916</a>          | <a href="#">232086</a> | transmembrane protein 150                             | <a href="#">Tmem150</a>            | 1.167 | 1.962 | 0.0893679  | 0.288444  |
| 2724 | 10564467 | <a href="#">NM_175124</a>          | <a href="#">67867</a>  | leucine rich repeat containing                        | <a href="#">Lrrc28</a>             | 1.167 | 1.163 | 0.281925   | 0.557053  |
| 2725 | 10526098 | <a href="#">NM_183088</a>          | <a href="#">71970</a>  | RIKEN cDNA 2410018M08<br>gene                         | <a href="#">2410018M08Rik</a>      | 1.167 | 1.287 | 0.237698   | 0.510106  |
| 2726 | 10561787 | <a href="#">NM_001037707</a>       | <a href="#">22689</a>  | zinc finger protein 27                                | <a href="#">Zfp27</a>              | 1.167 | 1.298 | 0.2341     | 0.50534   |
| 2727 | 10509777 | <a href="#">NM_183148</a>          | <a href="#">212632</a> | expressed sequence C79267                             | <a href="#">C79267</a>             | 1.167 | 2.331 | 0.051468   | 0.204942  |
| 2728 | 10365682 | <a href="#">BC098373</a>           | <a href="#">77531</a>  | ankyrin repeat and sterile alp                        | <a href="#">Anks1b</a>             | 1.166 | 1.817 | 0.110757   | 0.329467  |
| 2729 | 10403455 | <a href="#">NM_001081426</a>       | <a href="#">208440</a> | DIP2 disco-interacting protein                        | <a href="#">Dip2c</a>              | 1.166 | 1.279 | 0.240517   | 0.513583  |
| 2730 | 10391577 | <a href="#">NM_001077696</a>       | <a href="#">15184</a>  | histone deacetylase 5                                 | <a href="#">Hdac5</a>              | 1.166 | 3.2   | 0.0144775  | 0.0881404 |
| 2731 | 10517328 | <a href="#">NM_027935</a>          | <a href="#">71817</a>  | transmembrane protein 50A                             | <a href="#">Tmem50a</a>            | 1.166 | 1.763 | 0.120099   | 0.346527  |
| 2732 | 10473965 | <a href="#">NM_146124</a>          | <a href="#">228359</a> | Rho GTPase activating protein                         | <a href="#">Arhgap1</a>            | 1.166 | 2.349 | 0.0501407  | 0.201363  |
| 2733 | 10367224 | <a href="#">NM_019963</a>          | <a href="#">20847</a>  | signal transducer and activato                        | <a href="#">Stat2</a>              | 1.166 | 2.083 | 0.0746066  | 0.258307  |
| 2734 | 10382115 | <a href="#">NM_177088</a>          | <a href="#">320162</a> | coiled-coil domain containing                         | <a href="#">Cede45</a>             | 1.166 | 2.458 | 0.0426196  | 0.180844  |
| 2735 | 10401637 | <a href="#">NM_145138</a>          | <a href="#">217718</a> | NIMA (never in mitosis gene a)                        | <a href="#">Nek9</a>               | 1.166 | 1.964 | 0.0891226  | 0.287844  |
| 2736 | 10443598 | <a href="#">NM_013811</a>          | <a href="#">13417</a>  | dynein, axonemal, heavy chain                         | <a href="#">Dnahc8</a>             | 1.165 | 2.926 | 0.0214124  | 0.114576  |
| 2737 | 10402708 | <a href="#">NM_021273</a>          | <a href="#">12709</a>  | creatine kinase, brain                                | <a href="#">Ckb</a>                | 1.165 | 0.584 | 0.577208   | 0.797771  |
| 2738 | 10488626 | <a href="#">NM_175126</a>          | <a href="#">67917</a>  | zinc finger, CCHC domain conta                        | <a href="#">Zcchc3</a>             | 1.165 | 1.531 | 0.168495   | 0.419875  |
| 2739 | 10350751 | <a href="#">NM_178244</a>          | <a href="#">240819</a> | transmembrane epididymal prote                        | <a href="#">Teddm1</a>             | 1.165 | 2.614 | 0.0337881  | 0.155173  |
| 2740 | 10437073 | <a href="#">NM_133229</a>          | <a href="#">170765</a> | rippy3 homolog (zebrafish)                            | <a href="#">Ripply3</a>            | 1.165 | 1.812 | 0.111666   | 0.330683  |
| 2741 | 10491603 | <a href="#">ENSMUST00000057272</a> | <a href="#">229227</a> | RIKEN cDNA 4932438A13<br>gene                         | <a href="#">4932438A13Rik</a>      | 1.165 | 1.396 | 0.204152   | 0.467365  |
| 2742 | 10355530 | <a href="#">BC052740</a>           | <a href="#">21961</a>  | tensin 1                                              | <a href="#">Tns1</a>               | 1.165 | 3.112 | 0.0163988  | 0.0962086 |
| 2743 | 10600150 | <a href="#">NM_031494</a>          | <a href="#">27081</a>  | zinc finger protein 275                               | <a href="#">Zfp275</a>             | 1.165 | 3.573 | 0.00861933 | 0.0610748 |
| 2744 | 10547177 | <a href="#">NM_178045</a>          | <a href="#">213391</a> | Ras association (RalGDS/AF-6)                         | <a href="#">Rassf4</a>             | 1.165 | 2.127 | 0.0698722  | 0.247709  |
| 2745 | 10578746 | <a href="#">BC088983</a>           | <a href="#">382010</a> | cDNA sequence BC088983                                | <a href="#">BC088983</a>           | 1.165 | 2.5   | 0.0400107  | 0.174     |
| 2746 | 10443089 | <a href="#">XM_985548</a>          | <a href="#">240057</a> | synaptic Ras GTPase activating                        | <a href="#">Syngap1</a>            | 1.165 | 1.962 | 0.0892758  | 0.28819   |
| 2747 | 10387111 | <a href="#">NM_025510</a>          | <a href="#">66358</a>  | RIKEN cDNA 2310004I24 gene                            | <a href="#">2310004I24Rik</a>      | 1.165 | 2.941 | 0.020948   | 0.113309  |
| 2748 | 10453026 | <a href="#">NM_029239</a>          | <a href="#">75292</a>  | protein kinase D3                                     | <a href="#">Prkd3</a>              | 1.165 | 2.049 | 0.0784351  | 0.266489  |
| 2749 | 10496387 | <a href="#">BC117717</a>           | <a href="#">70604</a>  | DnaJ (Hsp40) homolog, subfamil                        | <a href="#">Dnajb14</a>            | 1.165 | 1.275 | 0.241705   | 0.514457  |
| 2750 | 10550200 |                                    |                        |                                                       |                                    | 1.164 | 1.133 | 0.293645   | 0.56967   |
| 2751 | 10388263 |                                    |                        |                                                       |                                    | 1.164 | 3.147 | 0.0156019  | 0.0928214 |
| 2752 | 10490794 | <a href="#">NM_008862</a>          | <a href="#">18767</a>  | protein kinase inhibitor, alph                        | <a href="#">Pkia</a>               | 1.164 | 2.347 | 0.0502657  | 0.201609  |
| 2753 | 10458534 | <a href="#">NM_029357</a>          | <a href="#">75599</a>  | protocadherin 1                                       | <a href="#">Pcdh1</a>              | 1.164 | 1.294 | 0.235634   | 0.507379  |
| 2754 | 10361234 | <a href="#">NM_008288</a>          | <a href="#">15483</a>  | hydroxysteroid 11-beta dehydro                        | <a href="#">Hsd11b1</a>            | 1.164 | 1.742 | 0.123779   | 0.352065  |
| 2755 | 10434577 | <a href="#">NM_001081366</a>       | <a href="#">209018</a> | vacuolar protein sorting 8 hom                        | <a href="#">Vps8</a>               | 1.164 | 3.342 | 0.0118598  | 0.0762431 |
| 2756 | 10475199 | <a href="#">NM_009222</a>          | <a href="#">20619</a>  | synaptosomal-associated protei                        | <a href="#">Snap23</a>             | 1.164 | 2.174 | 0.0651123  | 0.237986  |
| 2757 | 10564343 | <a href="#">NM_009386</a>          | <a href="#">21872</a>  | tight junction protein 1                              | <a href="#">Tjpl</a>               | 1.164 | 2.494 | 0.0403909  | 0.174969  |
| 2758 | 10391949 | <a href="#">NM_019650</a>          | <a href="#">56494</a>  | golgi SNAP receptor complex<br>me                     | <a href="#">Gosr2</a>              | 1.164 | 1.566 | 0.159963   | 0.407305  |
| 2759 | 10455227 | <a href="#">NM_020012</a>          | <a href="#">56736</a>  | ring finger protein 14                                | <a href="#">Rnf14</a>              | 1.164 | 3.28  | 0.0129363  | 0.0811915 |
| 2760 | 10575993 | <a href="#">BC027126</a>           | <a href="#">234797</a> | RIKEN cDNA 6430548M08<br>gene                         | <a href="#">6430548M08Rik</a>      | 1.163 | 2.735 | 0.0282854  | 0.137931  |
| 2761 | 10558150 | <a href="#">NM_019564</a>          | <a href="#">56213</a>  | HtrA serine peptidase 1                               | <a href="#">Htra1</a>              | 1.163 | 1.881 | 0.100845   | 0.310827  |
| 2762 | 10456357 | <a href="#">NM_021451</a>          | <a href="#">58801</a>  | phorbol-12-myristate-13-acetat                        | <a href="#">Pmaip1</a>             | 1.163 | 1.694 | 0.132753   | 0.36644   |
| 2763 | 10409486 | <a href="#">NM_001114088</a>       | <a href="#">67399</a>  | PDZ and LIM domain 7                                  | <a href="#">Pdlim7</a>             | 1.163 | 1.575 | 0.158016   | 0.405065  |

|      |          |                                    |                        |                                |                               |       |       |           |          |
|------|----------|------------------------------------|------------------------|--------------------------------|-------------------------------|-------|-------|-----------|----------|
| 2764 | 10408127 | <a href="#">XR_051997</a>          | <a href="#">665703</a> | similar to E1AA16 protein      | <a href="#">LOC665703</a>     | 1.163 | 1.386 | 0.206965  | 0.471406 |
| 2765 | 10508151 | <a href="#">NM_175554</a>          | <a href="#">269582</a> | claspin homolog (Xenopus laevi | <a href="#">Clspn</a>         | 1.163 | 2.622 | 0.0334263 | 0.154248 |
| 2766 | 10401841 | <a href="#">NM_010050</a>          | <a href="#">13371</a>  | deiodinase, iodothyronine, typ | <a href="#">Dio2</a>          | 1.163 | 2.129 | 0.0695849 | 0.247236 |
| 2767 | 10563116 | <a href="#">NM_013520</a>          | <a href="#">14256</a>  | FMS-like tyrosine kinase 3 lig | <a href="#">Flt3l</a>         | 1.163 | 2.654 | 0.0318629 | 0.149381 |
| 2768 | 10566161 | <a href="#">NM_198012</a>          | <a href="#">101700</a> | tripartite motif-containing 68 | <a href="#">Trim68</a>        | 1.162 | 1.311 | 0.229994  | 0.501029 |
| 2769 | 10406141 | <a href="#">NM_001024508</a>       | <a href="#">105246</a> | bromodomain containing 9       | <a href="#">Brd9</a>          | 1.162 | 2.158 | 0.0666931 | 0.241223 |
| 2770 | 10420787 | <a href="#">NM_177594</a>          | <a href="#">210376</a> | myotubularin related protein 9 | <a href="#">Mtmr9</a>         | 1.162 | 2.186 | 0.0639349 | 0.234857 |
| 2771 | 10372618 | <a href="#">NM_177798</a>          | <a href="#">327826</a> | fibroblast growth factor recep | <a href="#">Frs2</a>          | 1.162 | 1.723 | 0.127342  | 0.357621 |
| 2772 | 10374325 | <a href="#">ENSMUST00000053570</a> | <a href="#">432534</a> | predicted gene, EG432534       | <a href="#">EG432534</a>      | 1.162 | 1.998 | 0.0846577 | 0.279368 |
| 2773 | 10507606 | <a href="#">NM_024462</a>          | <a href="#">69216</a>  | coiled-coil domain containing  | <a href="#">Ccdc23</a>        | 1.162 | 1.856 | 0.104528  | 0.318143 |
| 2774 | 10604897 |                                    |                        |                                |                               | 1.162 | 1.084 | 0.313184  | 0.589668 |
| 2775 | 10496737 | <a href="#">NM_009740</a>          | <a href="#">12042</a>  | B-cell leukemia/lymphoma 10    | <a href="#">Bcl10</a>         | 1.162 | 1.701 | 0.13141   | 0.364065 |
| 2776 | 10578786 | <a href="#">AK006215</a>           | <a href="#">66331</a>  | RIKEN cDNA 1700021K10 gene     | <a href="#">1700021K10Rik</a> | 1.162 | 3.002 | 0.0192051 | 0.106749 |
| 2777 | 10369932 | <a href="#">NM_027890</a>          | <a href="#">71733</a>  | sushi domain containing 2      | <a href="#">Susc2</a>         | 1.162 | 2.59  | 0.0350428 | 0.159035 |
| 2778 | 10584537 | <a href="#">NM_146615</a>          | <a href="#">258608</a> | olfactory receptor 986         | <a href="#">Olfr986</a>       | 1.162 | 1.69  | 0.133631  | 0.368143 |
| 2779 | 10500371 | <a href="#">NR_003619</a>          | <a href="#">229613</a> | RIKEN cDNA 6330549D23 gene     | <a href="#">6330549D23Rik</a> | 1.162 | 2.263 | 0.0569756 | 0.218321 |
| 2780 | 10379262 | <a href="#">NM_010897</a>          | <a href="#">18015</a>  | neurofibromatosis 1            | <a href="#">Nf1</a>           | 1.162 | 2.823 | 0.0248786 | 0.127092 |
| 2781 | 10503283 | <a href="#">BC033309</a>           | <a href="#">66185</a>  | RIKEN cDNA 1110037F02 gene     | <a href="#">1110037F02Rik</a> | 1.162 | 2.388 | 0.0472692 | 0.193319 |
| 2782 | 10574415 | <a href="#">ENSMUST00000065508</a> | <a href="#">73323</a>  | RIKEN cDNA 1700047G07 gene     | <a href="#">1700047G07Rik</a> | 1.162 | 0.585 | 0.57612   | 0.797166 |
| 2783 | 10442240 | <a href="#">NM_001008501</a>       | <a href="#">240034</a> | zinc finger protein 760        | <a href="#">Zfp760</a>        | 1.162 | 2.982 | 0.019753  | 0.108935 |
| 2784 | 10513666 | <a href="#">NM_001045514</a>       | <a href="#">100182</a> | AT-hook transcription factor   | <a href="#">Akna</a>          | 1.162 | 2.381 | 0.0477936 | 0.194851 |
| 2785 | 10500911 | <a href="#">NM_008619</a>          | <a href="#">17454</a>  | Moloney leukemia virus 10      | <a href="#">Mov10</a>         | 1.162 | 1.655 | 0.140626  | 0.379406 |
| 2786 | 10362630 |                                    |                        |                                |                               | 1.162 | 1.334 | 0.222772  | 0.492656 |
| 2787 | 10453573 | <a href="#">NM_146937</a>          | <a href="#">258939</a> | olfactory receptor 63          | <a href="#">Olfr63</a>        | 1.162 | 2.928 | 0.0213554 | 0.114429 |
| 2788 | 10413018 | <a href="#">NM_027996</a>          | <a href="#">268721</a> | RIKEN cDNA 2310021P13 gene     | <a href="#">2310021P13Rik</a> | 1.162 | 2.629 | 0.0330955 | 0.153434 |
| 2789 | 10585318 | <a href="#">NM_001104617</a>       | <a href="#">19684</a>  | radixin                        | <a href="#">Rdx</a>           | 1.162 | 1.818 | 0.110593  | 0.329025 |
| 2790 | 10350102 | <a href="#">NM_177081</a>          | <a href="#">320139</a> | protein tyrosine phosphatase,  | <a href="#">Ptpn7</a>         | 1.162 | 3.066 | 0.0175022 | 0.100018 |
| 2791 | 10535477 | <a href="#">NM_029749</a>          | <a href="#">76800</a>  | ubiquitin specific peptidase 4 | <a href="#">Usp42</a>         | 1.162 | 2.009 | 0.0833205 | 0.276517 |
| 2792 | 10403466 | <a href="#">NM_001081426</a>       | <a href="#">208440</a> | DIP2 disco-interacting protein | <a href="#">Dip2c</a>         | 1.162 | 1.804 | 0.112926  | 0.332876 |
| 2793 | 10386095 | <a href="#">BC019518</a>           | <a href="#">67726</a>  | RIKEN cDNA 1810073G14 gene     | <a href="#">1810073G14Rik</a> | 1.161 | 2.391 | 0.0470594 | 0.192831 |
| 2794 | 10352936 | <a href="#">NM_011441</a>          | <a href="#">20671</a>  | SRY-box containing gene 17     | <a href="#">Sox17</a>         | 1.161 | 2.32  | 0.052334  | 0.206948 |
| 2795 | 10496036 | <a href="#">NM_029838</a>          | <a href="#">77018</a>  | collagen, type XXV, alpha 1    | <a href="#">Col25a1</a>       | 1.161 | 2.373 | 0.0483475 | 0.196543 |
| 2796 | 10555681 | <a href="#">NM_009287</a>          | <a href="#">20866</a>  | stromal interaction molecule 1 | <a href="#">Stim1</a>         | 1.161 | 1.331 | 0.223835  | 0.493923 |
| 2797 | 10455974 | <a href="#">NM_026302</a>          | <a href="#">67665</a>  | dynactin 4                     | <a href="#">Dctn4</a>         | 1.161 | 2.171 | 0.0654185 | 0.238533 |
| 2798 | 10498599 | <a href="#">NM_026641</a>          | <a href="#">68259</a>  | intraflagellar transport 80 ho | <a href="#">Ift80</a>         | 1.161 | 1.445 | 0.190397  | 0.449354 |
| 2799 | 10551777 | <a href="#">NM_146185</a>          | <a href="#">233056</a> | zinc finger protein 790        | <a href="#">Zfp790</a>        | 1.161 | 1.226 | 0.258723  | 0.532869 |
| 2800 | 10350077 | <a href="#">NM_009307</a>          | <a href="#">20980</a>  | synaptotagmin II               | <a href="#">Syt2</a>          | 1.161 | 2.799 | 0.0257535 | 0.129991 |
| 2801 | 10511617 | <a href="#">NM_026558</a>          | <a href="#">68099</a>  | RIKEN cDNA 6720467C03 gene     | <a href="#">6720467C03Rik</a> | 1.161 | 1.917 | 0.0955042 | 0.300408 |
| 2802 | 10402705 | <a href="#">BC145736</a>           | <a href="#">212539</a> | gene model 266, (NCBI)         | <a href="#">Gm266</a>         | 1.161 | 1.309 | 0.230719  | 0.501597 |
| 2803 | 10475782 | <a href="#">NM_010090</a>          | <a href="#">13537</a>  | dual specificity phosphatase 2 | <a href="#">Dusp2</a>         | 1.161 | 2.398 | 0.0465571 | 0.191742 |
| 2804 | 10479833 | <a href="#">NM_181848</a>          | <a href="#">71648</a>  | optineurin                     | <a href="#">Optn</a>          | 1.161 | 2.415 | 0.0454224 | 0.188649 |
| 2805 | 10564266 | <a href="#">NM_013788</a>          | <a href="#">27412</a>  | paternally expressed 12        | <a href="#">Peg12</a>         | 1.161 | 2.972 | 0.0200418 | 0.109926 |
| 2806 | 10478678 | <a href="#">NM_170701</a>          | <a href="#">21939</a>  | CD40 antigen                   | <a href="#">Cd40</a>          | 1.161 | 2.609 | 0.0340411 | 0.156063 |
| 2807 | 10409833 | <a href="#">NM_008086</a>          | <a href="#">14451</a>  | growth arrest specific 1       | <a href="#">Gas1</a>          | 1.161 | 2.733 | 0.0283915 | 0.138257 |
| 2808 | 10422725 |                                    |                        |                                |                               | 1.161 | 1.332 | 0.223278  | 0.493208 |
| 2809 | 10531980 | <a href="#">NM_172777</a>          | <a href="#">236573</a> | cDNA sequence BC057170         | <a href="#">BC057170</a>      | 1.161 | 2.047 | 0.0786536 | 0.2669   |
| 2810 | 10484249 | <a href="#">BC003993</a>           | <a href="#">80744</a>  | cDNA sequence BC003993         | <a href="#">BC003993</a>      | 1.161 | 0.402 | 0.699023  | 0.868099 |
| 2811 | 10440953 | <a href="#">NM_021720</a>          | <a href="#">60364</a>  | downstream neighbor of SON     | <a href="#">Donson</a>        | 1.161 | 2.62  | 0.0335004 | 0.154383 |
| 2812 | 10402787 | <a href="#">ENSMUST00000010109</a> | <a href="#">382643</a> | AHNAK nucleoprotein 2          | <a href="#">Ahnak2</a>        | 1.161 | 1.8   | 0.113605  | 0.334131 |
| 2813 | 10407081 | <a href="#">NM_178683</a>          | <a href="#">218581</a> | DEP domain containing 1B       | <a href="#">Depdc1b</a>       | 1.161 | 1.545 | 0.164987  | 0.415127 |
| 2814 | 10496862 |                                    |                        |                                |                               | 1.16  | 2.59  | 0.0350203 | 0.159001 |
| 2815 | 10499914 | <a href="#">NM_026822</a>          | <a href="#">68720</a>  | late cornified envelope 1B     | <a href="#">Lcel1b</a>        | 1.16  | 0.859 | 0.418024  | 0.680624 |
| 2816 | 10603116 | <a href="#">NM_026853</a>          | <a href="#">68854</a>  | ankyrin repeat and SOCS box-co | <a href="#">Asb11</a>         | 1.16  | 2.878 | 0.0229636 | 0.120303 |
| 2817 | 10442026 | <a href="#">NM_001024050</a>       | <a href="#">210069</a> | zinc finger protein 562        | <a href="#">Zfp562</a>        | 1.16  | 1.609 | 0.150222  | 0.202404 |

|      |          |                                    |                        |                                            |                                    |       |       |           |           |
|------|----------|------------------------------------|------------------------|--------------------------------------------|------------------------------------|-------|-------|-----------|-----------|
| 2817 | 10443920 | <a href="#">NM_001024920</a>       | <a href="#">240068</a> | zinc finger protein 303                    | <a href="#">Zfp303</a>             | 1.16  | 1.609 | 0.150355  | 0.393494  |
| 2818 | 10600034 | <a href="#">ENSMUST00000101495</a> | <a href="#">382221</a> | gene model 1141, (NCBI)                    | <a href="#">Gm1141</a>             | 1.16  | 3.065 | 0.0175464 | 0.100162  |
| 2819 | 10536472 | <a href="#">NM_175088</a>          | <a href="#">16543</a>  | MyoD family inhibitor domain c             | <a href="#">Mdfic</a>              | 1.16  | 2.359 | 0.0493496 | 0.199512  |
| 2820 | 10396862 | <a href="#">AF031663</a>           | <a href="#">20904</a>  | striamin                                   | <a href="#">Strm</a>               | 1.16  | 1.616 | 0.148952  | 0.391187  |
| 2821 | 10600936 | <a href="#">NM_010110</a>          | <a href="#">13641</a>  | ephrin B1                                  | <a href="#">Efnb1</a>              | 1.16  | 3.086 | 0.0170133 | 0.0983942 |
| 2822 | 10473224 | <a href="#">NM_024438</a>          | <a href="#">68082</a>  | dual specificity phosphatase 1             | <a href="#">Dusp19</a>             | 1.16  | 1.729 | 0.126122  | 0.355658  |
| 2823 | 10573281 | <a href="#">NM_183097</a>          | <a href="#">73453</a>  | RIKEN cDNA 1700067K01                      | <a href="#">1700067K01Rik</a>      | 1.16  | 1.854 | 0.104861  | 0.318836  |
| 2824 | 10489891 | <a href="#">NM_019835</a>          | <a href="#">56336</a>  | gene<br>UDP-Gal:betaGlcNAc beta 1,4-<br>ga | <a href="#">B4galt5</a>            | 1.16  | 1.459 | 0.186674  | 0.444956  |
| 2825 | 10517463 | <a href="#">ENSMUST00000105848</a> | <a href="#">269593</a> | leucine zipper protein 1                   | <a href="#">Luzp1</a>              | 1.159 | 2.84  | 0.0242852 | 0.124965  |
| 2826 | 10415408 | <a href="#">ENSMUST00000100529</a> | <a href="#">277154</a> | cDNA sequence BC030046                     | <a href="#">BC030046</a>           | 1.159 | 1.752 | 0.121939  | 0.348793  |
| 2827 | 10559782 | <a href="#">NM_146914</a>          | <a href="#">18349</a>  | olfactory receptor 5                       | <a href="#">Olfr5</a>              | 1.159 | 1.365 | 0.213354  | 0.479304  |
| 2828 | 10374934 | <a href="#">NM_134013</a>          | <a href="#">103554</a> | proteasome (prosome, macropain)            | <a href="#">Psmc4</a>              | 1.159 | 2.681 | 0.030616  | 0.14567   |
| 2829 | 10394258 | <a href="#">NM_138305</a>          | <a href="#">104111</a> | adenylate cyclase 3                        | <a href="#">Adcy3</a>              | 1.159 | 2.579 | 0.0356072 | 0.1607    |
| 2830 | 10562592 | <a href="#">NM_177890</a>          | <a href="#">330513</a> | predicted gene, EG330513                   | <a href="#">EG330513</a>           | 1.159 | 1.967 | 0.0886754 | 0.286953  |
| 2831 | 10454286 | <a href="#">NM_153058</a>          | <a href="#">212307</a> | microtubule-associated protein             | <a href="#">Mapre2</a>             | 1.159 | 2.231 | 0.0597407 | 0.225162  |
| 2832 | 10406852 | <a href="#">ENSMUST00000029773</a> | <a href="#">71994</a>  | calponin 3, acidic                         | <a href="#">Cnn3</a>               | 1.159 | 0.461 | 0.658075  | 0.847091  |
| 2833 | 10483770 | <a href="#">NM_001110209</a>       | <a href="#">69605</a>  | limb and neural patterns                   | <a href="#">Lnp</a>                | 1.159 | 1.154 | 0.285201  | 0.560488  |
| 2834 | 10514193 |                                    |                        |                                            |                                    | 1.159 | 1.199 | 0.268366  | 0.542786  |
| 2835 | 10348917 | <a href="#">NM_026321</a>          | <a href="#">67698</a>  | transmembrane protein 157                  | <a href="#">Tmem157</a>            | 1.159 | 1.544 | 0.1652    | 0.415326  |
| 2836 | 10407792 | <a href="#">NR_003568</a>          | <a href="#">664862</a> | G protein-coupled receptor 137             | <a href="#">Gpr137b-ps</a>         | 1.159 | 1.663 | 0.138934  | 0.377005  |
| 2837 | 10405125 | <a href="#">NM_175401</a>          | <a href="#">109082</a> | F-box and WD-40 domain<br>protein          | <a href="#">Fbxw17</a>             | 1.159 | 1.625 | 0.146833  | 0.388752  |
| 2838 | 10503711 | <a href="#">NM_011997</a>          | <a href="#">26885</a>  | caspase 8 associated protein 2             | <a href="#">Casp8ap2</a>           | 1.159 | 3.111 | 0.0164129 | 0.0962129 |
| 2839 | 10482918 | <a href="#">ENSMUST00000115987</a> | <a href="#">667103</a> | similar to brain protein 44-li             | <a href="#">LOC667103</a>          | 1.159 | 0.791 | 0.453978  | 0.710504  |
| 2840 | 10554969 | <a href="#">NM_011858</a>          | <a href="#">23966</a>  | odd Oz/ten-m homolog 4<br>(Drosop)         | <a href="#">Odz4</a>               | 1.159 | 2.066 | 0.0764872 | 0.262157  |
| 2841 | 10350742 | <a href="#">NM_011882</a>          | <a href="#">24014</a>  | ribonuclease L (2', 5'-oligois             | <a href="#">Rnase1</a>             | 1.158 | 1.183 | 0.274237  | 0.548935  |
| 2842 | 10449551 | <a href="#">NM_153166</a>          | <a href="#">240058</a> | copine V                                   | <a href="#">Cpne5</a>              | 1.158 | 1.944 | 0.091834  | 0.293563  |
| 2843 | 10492102 | <a href="#">NM_144895</a>          | <a href="#">229285</a> | spastic paraplegia 20, spartin             | <a href="#">Spg20</a>              | 1.158 | 1.919 | 0.0952832 | 0.300009  |
| 2844 | 10473125 | <a href="#">NM_010576</a>          | <a href="#">16401</a>  | integrin alpha 4                           | <a href="#">Itga4</a>              | 1.158 | 1.276 | 0.241499  | 0.514365  |
| 2845 | 10351443 | <a href="#">NM_033652</a>          | <a href="#">110648</a> | LIM homeobox transcription fac             | <a href="#">Lmx1a</a>              | 1.158 | 1.823 | 0.109854  | 0.327703  |
| 2846 | 10494972 | <a href="#">BC117780</a>           | <a href="#">229672</a> | Bcl2-like 15                               | <a href="#">Bcl2l15</a>            | 1.158 | 1.09  | 0.310804  | 0.58733   |
| 2847 | 10493666 | <a href="#">ENSMUST00000029548</a> | <a href="#">77595</a>  | nucleoporin 210-like                       | <a href="#">Nup210l</a>            | 1.158 | 1.721 | 0.127639  | 0.358265  |
| 2848 | 10431845 | <a href="#">AK037810</a>           | <a href="#">791370</a> | predicted gene,<br>ENSMUSG0000005          | <a href="#">ENSMUSG00000053098</a> | 1.158 | 1.541 | 0.165923  | 0.416511  |
| 2849 | 10388749 | <a href="#">NM_009423</a>          | <a href="#">22032</a>  | Tnf receptor associated factor             | <a href="#">Traf4</a>              | 1.158 | 2.039 | 0.0796147 | 0.268824  |
| 2850 | 10520234 | <a href="#">NM_133913</a>          | <a href="#">100910</a> | RIKEN cDNA 2010209O12<br>gene              | <a href="#">2010209O12Rik</a>      | 1.158 | 2.519 | 0.0389205 | 0.17084   |
| 2851 | 10360834 | <a href="#">NM_008250</a>          | <a href="#">15284</a>  | H2.0-like homeobox                         | <a href="#">Hlx</a>                | 1.158 | 2.224 | 0.0603803 | 0.226645  |
| 2852 | 10551462 |                                    |                        |                                            |                                    | 1.158 | 1.942 | 0.0920437 | 0.293984  |
| 2853 | 10480950 | <a href="#">BC031595</a>           | <a href="#">52838</a>  | DNA segment, Chr 2, Brigham<br>&           | <a href="#">D2Bwg1335e</a>         | 1.157 | 1.273 | 0.242602  | 0.515498  |
| 2854 | 10426451 | <a href="#">NM_029926</a>          | <a href="#">266632</a> | interleukin-1 receptor-associa             | <a href="#">Irak4</a>              | 1.157 | 1.482 | 0.180785  | 0.436709  |
| 2855 | 10602180 | <a href="#">NM_177592</a>          | <a href="#">209497</a> | transmembrane protein 164                  | <a href="#">Tmem164</a>            | 1.157 | 2.931 | 0.0212701 | 0.114175  |
| 2856 | 10461071 | <a href="#">BC096638</a>           | <a href="#">108899</a> | RIKEN cDNA 2700081O15                      | <a href="#">2700081O15Rik</a>      | 1.157 | 2.049 | 0.0784444 | 0.266489  |
| 2857 | 10403743 | <a href="#">NM_008380</a>          | <a href="#">16323</a>  | gene<br>inhibin beta-A                     | <a href="#">Inhba</a>              | 1.157 | 1.29  | 0.237028  | 0.509165  |
| 2858 | 10410644 | <a href="#">NM_001081680</a>       | <a href="#">238722</a> | zinc finger protein 72                     | <a href="#">Zfp72</a>              | 1.157 | 0.65  | 0.535639  | 0.769137  |
| 2859 | 10455738 | <a href="#">NM_026386</a>          | <a href="#">67804</a>  | sorting nexin 2                            | <a href="#">Snx2</a>               | 1.157 | 1.848 | 0.105806  | 0.320603  |
| 2860 | 10520111 | <a href="#">NM_153092</a>          | <a href="#">231042</a> | nucleoporin like 2                         | <a href="#">Nupl2</a>              | 1.157 | 2.231 | 0.0597516 | 0.225163  |
| 2861 | 10523168 | <a href="#">NM_053087</a>          | <a href="#">71920</a>  | epithelial mitogen                         | <a href="#">Epgn</a>               | 1.157 | 1.682 | 0.135195  | 0.370666  |
| 2862 | 10494460 | <a href="#">NM_011069</a>          | <a href="#">18632</a>  | peroxisomal biogenesis factor              | <a href="#">Pex11b</a>             | 1.157 | 1.815 | 0.111194  | 0.329929  |
| 2863 | 10436598 | <a href="#">ENSMUST00000068704</a> | <a href="#">77994</a>  | RIKEN cDNA 2810055G20<br>gene              | <a href="#">2810055G20Rik</a>      | 1.157 | 0.952 | 0.371838  | 0.642152  |
| 2864 | 10522378 | <a href="#">NM_153567</a>          | <a href="#">75991</a>  | SLAIN motif family, member 2               | <a href="#">Slain2</a>             | 1.157 | 1.639 | 0.143957  | 0.384952  |
| 2865 | 10505512 | <a href="#">NM_053084</a>          | <a href="#">69807</a>  | tripartite motif-containing 32             | <a href="#">Trim32</a>             | 1.157 | 1.79  | 0.115358  | 0.337519  |
| 2866 | 10385479 |                                    |                        |                                            |                                    | 1.157 | 1.579 | 0.157054  | 0.403482  |

|      |          |                                    |                           |                                 |                               |       |       |           |          |
|------|----------|------------------------------------|---------------------------|---------------------------------|-------------------------------|-------|-------|-----------|----------|
| 2867 | 10386628 | <a href="#">NM_025294</a>          | <a href="#">24083</a>     | gene trap locus F3b             | <a href="#">Gtf3b</a>         | 1.157 | 2.874 | 0.0230975 | 0.120795 |
| 2868 | 10368229 | <a href="#">NM_011603</a>          | <a href="#">237336</a>    | TATA box binding protein-like   | <a href="#">Tbpl1</a>         | 1.156 | 1.349 | 0.218081  | 0.486044 |
| 2869 | 10413657 | <a href="#">NM_029626</a>          | <a href="#">76485</a>     | glycosyltransferase 8 domain c  | <a href="#">Glt8d1</a>        | 1.156 | 1.903 | 0.097603  | 0.304473 |
| 2870 | 10487894 | <a href="#">NM_175445</a>          | <a href="#">215653</a>    | Ras association (RalGDS/AF-6)   | <a href="#">Rassf2</a>        | 1.156 | 1.932 | 0.0934785 | 0.296462 |
| 2871 | 10480321 | <a href="#">ENSMUST00000066163</a> | <a href="#">77940</a>     | RIKEN cDNA A930004D18 gene      | <a href="#">A930004D18Rik</a> | 1.156 | 1.211 | 0.264258  | 0.539355 |
| 2872 | 10353213 | <a href="#">NM_010827</a>          | <a href="#">17681</a>     | musculin                        | <a href="#">Msc</a>           | 1.156 | 0.968 | 0.364233  | 0.635557 |
| 2873 | 10359446 | <a href="#">ENSMUST00000097505</a> | <a href="#">226551</a>    | expressed sequence AI848100     | <a href="#">AI848100</a>      | 1.156 | 2.475 | 0.0415717 | 0.177907 |
| 2874 | 10489687 | <a href="#">BC067000</a>           | <a href="#">381405</a>    | gene model 1008, (NCBI)         | <a href="#">Gm1008</a>        | 1.156 | 2.369 | 0.0486715 | 0.197375 |
| 2875 | 10484545 | <a href="#">NM_146568</a>          | <a href="#">258561</a>    | olfactory receptor 1012         | <a href="#">Olf1012</a>       | 1.156 | 2.183 | 0.0642601 | 0.235643 |
| 2876 | 10504206 | <a href="#">BC057092</a>           | <a href="#">230085</a>    | expressed sequence N28178       | <a href="#">N28178</a>        | 1.156 | 1.878 | 0.101228  | 0.311554 |
| 2877 | 10474159 | <a href="#">NM_019735</a>          | <a href="#">56369</a>     | APAF1 interacting protein       | <a href="#">Apip</a>          | 1.156 | 1.949 | 0.0910566 | 0.291845 |
| 2878 | 10476299 |                                    |                           |                                 |                               | 1.156 | 1.109 | 0.303171  | 0.579207 |
| 2879 | 10468113 | <a href="#">NM_145703</a>          | <a href="#">80906</a>     | Kv channel-interacting protein  | <a href="#">Kcnip2</a>        | 1.156 | 1.828 | 0.108971  | 0.325894 |
| 2880 | 10575497 | <a href="#">BC060632</a>           | <a href="#">244654</a>    | cDNA sequence BC060632          | <a href="#">BC060632</a>      | 1.156 | 1.394 | 0.204821  | 0.4682   |
| 2881 | 10418991 | <a href="#">NM_027045</a>          | <a href="#">72972</a>     | granule cell antiserum positiv  | <a href="#">Gcap14</a>        | 1.156 | 1.923 | 0.0947001 | 0.298946 |
| 2882 | 10366951 | <a href="#">NM_001098789</a>       | <a href="#">407790</a>    | NADH dehydrogenase (ubiquinone) | <a href="#">Ndufa4l2</a>      | 1.156 | 1.139 | 0.29099   | 0.567132 |
| 2883 | 10362273 | <a href="#">ENSMUST00000041011</a> | <a href="#">100046281</a> | hypothetical protein LOC100046  | <a href="#">LOC100046281</a>  | 1.156 | 2.389 | 0.047184  | 0.19312  |
| 2884 | 10362073 | <a href="#">NM_011361</a>          | <a href="#">20393</a>     | serum/glucocorticoid regulated  | <a href="#">Sgk1</a>          | 1.156 | 2.286 | 0.0551008 | 0.214181 |
| 2885 | 10355582 | <a href="#">NM_176972</a>          | <a href="#">319651</a>    | ubiquitin specific peptidase 3  | <a href="#">Usp37</a>         | 1.156 | 2.159 | 0.0665716 | 0.241108 |
| 2886 | 10530819 | <a href="#">NM_175606</a>          | <a href="#">74318</a>     | HOP homeobox                    | <a href="#">Hopx</a>          | 1.156 | 2.026 | 0.0812528 | 0.272009 |
| 2887 | 10545583 | <a href="#">NM_025882</a>          | <a href="#">66979</a>     | polymerase (DNA-directed), eps  | <a href="#">Pole4</a>         | 1.155 | 1.26  | 0.246915  | 0.520256 |
| 2888 | 10491617 | <a href="#">ENSMUST00000057272</a> | <a href="#">229227</a>    | RIKEN cDNA 4932438A13 gene      | <a href="#">4932438A13Rik</a> | 1.155 | 1.397 | 0.203787  | 0.466884 |
| 2889 | 10574204 | <a href="#">NM_024191</a>          | <a href="#">107566</a>    | ADP-ribosylation factor-like 2  | <a href="#">Arl2bp</a>        | 1.155 | 1.29  | 0.23698   | 0.509116 |
| 2890 | 10468533 | <a href="#">NM_008149</a>          | <a href="#">14732</a>     | glycerol-3-phosphate acyltrans  | <a href="#">Gpam</a>          | 1.155 | 1.863 | 0.103551  | 0.316379 |
| 2891 | 10590533 | <a href="#">NM_177911</a>          | <a href="#">331046</a>    | transglutaminase 4 (prostate)   | <a href="#">Tgm4</a>          | 1.155 | 2.204 | 0.0622637 | 0.230804 |
| 2892 | 10501492 | <a href="#">XM_975707</a>          | <a href="#">433643</a>    | predicted gene, EG433643        | <a href="#">EG433643</a>      | 1.155 | 2.486 | 0.0408567 | 0.176265 |
| 2893 | 10402266 |                                    |                           |                                 |                               | 1.155 | 1.679 | 0.135809  | 0.371624 |
| 2894 | 10381702 | <a href="#">NM_027658</a>          | <a href="#">71059</a>     | hexamethylene bis-acetamide ind | <a href="#">Hexim2</a>        | 1.155 | 1.645 | 0.142737  | 0.382897 |
| 2895 | 10591241 | <a href="#">NM_146221</a>          | <a href="#">235028</a>    | zinc finger protein 426         | <a href="#">Zfp426</a>        | 1.155 | 1.333 | 0.223069  | 0.49298  |
| 2896 | 10364769 | <a href="#">NM_011789</a>          | <a href="#">23805</a>     | adenomatosis polyposis coli 2   | <a href="#">Apc2</a>          | 1.155 | 1.427 | 0.195308  | 0.455553 |
| 2897 | 10399897 | <a href="#">NM_153198</a>          | <a href="#">73389</a>     | high mobility group box transc  | <a href="#">Hbp1</a>          | 1.155 | 2.722 | 0.0288605 | 0.139608 |
| 2898 | 10577226 | <a href="#">BC099613</a>           | <a href="#">72148</a>     | RIKEN cDNA 2610019F03 gene      | <a href="#">2610019F03Rik</a> | 1.155 | 1.162 | 0.282198  | 0.557189 |
| 2899 | 10365966 | <a href="#">ENSMUST00000074615</a> | <a href="#">432491</a>    | predicted gene, EG432491        | <a href="#">EG432491</a>      | 1.155 | 0.574 | 0.583444  | 0.801477 |
| 2900 | 10346970 | <a href="#">NM_011086</a>          | <a href="#">18711</a>     | phosphatidylinositol-3-phospha  | <a href="#">Pip5k3</a>        | 1.155 | 1.65  | 0.141673  | 0.381209 |
| 2901 | 10361186 | <a href="#">NM_198247</a>          | <a href="#">214791</a>    | SERTA domain containing 4       | <a href="#">Sertad4</a>       | 1.155 | 1.604 | 0.151594  | 0.395471 |
| 2902 | 10530783 | <a href="#">AK043374</a>           | <a href="#">320411</a>    | RIKEN cDNA A730089K16 gene      | <a href="#">A730089K16Rik</a> | 1.155 | 2.472 | 0.0417619 | 0.178314 |
| 2903 | 10398124 | <a href="#">NM_178613</a>          | <a href="#">66787</a>     | RIKEN cDNA 4933433P14 gene      | <a href="#">4933433P14Rik</a> | 1.155 | 1.404 | 0.201913  | 0.464656 |
| 2904 | 10543362 | <a href="#">BC119565</a>           | <a href="#">73191</a>     | Fez family zinc finger 1        | <a href="#">Fezf1</a>         | 1.155 | 1.987 | 0.0860795 | 0.2817   |
| 2905 | 10392369 | <a href="#">NM_019431</a>          | <a href="#">54377</a>     | calcium channel, voltage-depen  | <a href="#">Cacng4</a>        | 1.155 | 1.267 | 0.244703  | 0.517866 |
| 2906 | 10365983 | <a href="#">NM_008524</a>          | <a href="#">17022</a>     | lumican                         | <a href="#">Lum</a>           | 1.155 | 0.258 | 0.803372  | 0.920129 |
| 2907 | 10409711 |                                    |                           |                                 |                               | 1.155 | 1.653 | 0.14107   | 0.380022 |
| 2908 | 10542731 | <a href="#">NM_027760</a>          | <a href="#">71323</a>     | Ras association (RalGDS/AF-6)   | <a href="#">Rassf8</a>        | 1.154 | 1.617 | 0.148548  | 0.390854 |
| 2909 | 10420860 | <a href="#">NM_028811</a>          | <a href="#">74195</a>     | elongation protein 3 homolog (  | <a href="#">Elp3</a>          | 1.154 | 1.822 | 0.109917  | 0.327797 |
| 2910 | 10412650 | <a href="#">NM_027782</a>          | <a href="#">71393</a>     | potassium channel tetramerisat  | <a href="#">Kctd6</a>         | 1.154 | 2.164 | 0.0660817 | 0.239852 |
| 2911 | 10538732 | <a href="#">NM_008167</a>          | <a href="#">14804</a>     | glutamate receptor, ionotropic  | <a href="#">Grid2</a>         | 1.154 | 2.01  | 0.083155  | 0.276321 |
| 2912 | 10487021 | <a href="#">NM_011774</a>          | <a href="#">22785</a>     | solute carrier family 30 (zinc  | <a href="#">Slc30a4</a>       | 1.154 | 1.353 | 0.216867  | 0.484361 |
| 2913 | 10460070 |                                    |                           |                                 |                               | 1.154 | 2.449 | 0.0431645 | 0.182497 |
| 2914 | 10347873 | <a href="#">NM_010472</a>          | <a href="#">15463</a>     | HIV-1 Rev binding protein       | <a href="#">Hrb</a>           | 1.154 | 1.92  | 0.0950881 | 0.299747 |
| 2915 | 10458583 | <a href="#">NM_023311</a>          | <a href="#">67180</a>     | Yip1 domain family, member 5    | <a href="#">Yipf5</a>         | 1.154 | 1.319 | 0.227622  | 0.498429 |
| 2916 | 10476297 |                                    |                           |                                 |                               | 1.154 | 1.402 | 0.202442  | 0.465275 |
| 2917 | 10494151 |                                    |                           |                                 |                               | 1.154 | 1.112 | 0.301881  | 0.577905 |
| 2918 | 10384452 | <a href="#">NM_024475</a>          | <a href="#">79560</a>     | ubiquitin-like domain containi  | <a href="#">Ublep1</a>        | 1.154 | 1.604 | 0.151513  | 0.395407 |
| 2919 | 10443077 | <a href="#">BC113101</a>           | <a href="#">77128</a>     | RIKEN cDNA A930001N09           | <a href="#">A930001N09Rik</a> | 1.154 | 2.042 | 0.0792996 | 0.268093 |

|      |          |                                    |                           |                                           |                                    |       |       |           |           |
|------|----------|------------------------------------|---------------------------|-------------------------------------------|------------------------------------|-------|-------|-----------|-----------|
| 2920 | 10578249 | <a href="#">AK133068</a>           | <a href="#">100038521</a> | gene<br>predicted gene,<br>ENSMUSG0000007 | <a href="#">ENSMUSG00000074383</a> | 1.154 | 1.233 | 0.25641   | 0.530714  |
| 2921 | 10536429 | <a href="#">NM_027992</a>          | <a href="#">71900</a>     | transmembrane protein 106B                | <a href="#">Tmem106b</a>           | 1.154 | 1.436 | 0.192917  | 0.452347  |
| 2922 | 10562468 | <a href="#">NM_028034</a>          | <a href="#">71981</a>     | tudor domain containing 12                | <a href="#">Tdrd12</a>             | 1.154 | 2.485 | 0.0409248 | 0.176312  |
| 2923 | 10440314 | <a href="#">NM_178721</a>          | <a href="#">239857</a>    | cell adhesion molecule 2                  | <a href="#">Cadm2</a>              | 1.154 | 2.277 | 0.0558081 | 0.215684  |
| 2924 | 10375751 | <a href="#">NM_175643</a>          | <a href="#">216725</a>    | a disintegrin-like and metallo            | <a href="#">Adams2</a>             | 1.153 | 3.057 | 0.0177368 | 0.10095   |
| 2925 | 10397966 | <a href="#">NM_026580</a>          | <a href="#">68149</a>     | OTU domain, ubiquitin aldehyde            | <a href="#">Otub2</a>              | 1.153 | 1.925 | 0.0943502 | 0.298153  |
| 2926 | 10489694 | <a href="#">NM_178411</a>          | <a href="#">228876</a>    | zinc finger protein 334                   | <a href="#">Zfp334</a>             | 1.153 | 1.162 | 0.282367  | 0.557354  |
| 2927 | 10569399 | <a href="#">NM_020277</a>          | <a href="#">56843</a>     | transient receptor potential c            | <a href="#">Trpm5</a>              | 1.153 | 0.659 | 0.530482  | 0.765382  |
| 2928 | 10527694 | <a href="#">NM_001081204</a>       | <a href="#">381694</a>    | beta 1,3-galactosyltransferase            | <a href="#">B3galtl</a>            | 1.153 | 2.026 | 0.0812101 | 0.271995  |
| 2929 | 10532576 | <a href="#">XM_912851</a>          | <a href="#">74376</a>     | myosin XVIIIb                             | <a href="#">Myo18b</a>             | 1.153 | 1.349 | 0.218078  | 0.486044  |
| 2930 | 10536827 | <a href="#">BC006583</a>           | <a href="#">232664</a>    | coiled-coil domain containing             | <a href="#">Ccdc136</a>            | 1.153 | 1.979 | 0.0871667 | 0.284169  |
| 2931 | 10531583 | <a href="#">ENSMUST00000086912</a> | <a href="#">75500</a>     | RIKEN cDNA 1700010H22<br>gene             | <a href="#">1700010H22Rik</a>      | 1.153 | 1.485 | 0.179806  | 0.43509   |
| 2932 | 10351636 | <a href="#">NM_019484</a>          | <a href="#">56009</a>     | RNA and export factor binding             | <a href="#">Refbp2</a>             | 1.153 | 2.276 | 0.0558868 | 0.21583   |
| 2933 | 10427286 | <a href="#">NM_008272</a>          | <a href="#">15427</a>     | homeo box C9                              | <a href="#">Hoxc9</a>              | 1.153 | 2.252 | 0.0579612 | 0.220856  |
| 2934 | 10570875 | <a href="#">NM_001081149</a>       | <a href="#">244349</a>    | MYST histone acetyltransferase            | <a href="#">Myst3</a>              | 1.153 | 2.031 | 0.0806373 | 0.270969  |
| 2935 | 10347351 | <a href="#">NM_153088</a>          | <a href="#">227292</a>    | CTD (carboxy-terminal domain,             | <a href="#">Ctdsp1</a>             | 1.153 | 1.309 | 0.230546  | 0.501476  |
| 2936 | 10485307 |                                    |                           |                                           |                                    | 1.153 | 0.726 | 0.490985  | 0.737628  |
| 2937 | 10528268 | <a href="#">NM_011203</a>          | <a href="#">19248</a>     | protein tyrosine phosphatase,             | <a href="#">Ptpn12</a>             | 1.153 | 2.365 | 0.0489533 | 0.198327  |
| 2938 | 10571319 |                                    |                           |                                           |                                    | 1.153 | 1.111 | 0.302367  | 0.578522  |
| 2939 | 10606831 | <a href="#">NM_030106</a>          | <a href="#">78478</a>     | RIKEN cDNA 1700129I15 gene                | <a href="#">1700129I15Rik</a>      | 1.153 | 0.664 | 0.527328  | 0.762963  |
| 2940 | 10524169 | <a href="#">NM_011132</a>          | <a href="#">18973</a>     | polymerase (DNA directed), eps            | <a href="#">Pole</a>               | 1.153 | 2.284 | 0.0552403 | 0.214463  |
| 2941 | 10447742 | <a href="#">NM_011948</a>          | <a href="#">26407</a>     | mitogen-activated protein kina            | <a href="#">Map3k4</a>             | 1.153 | 1.964 | 0.0890531 | 0.287785  |
| 2942 | 10469312 | <a href="#">NM_008961</a>          | <a href="#">19212</a>     | phosphotriesterase related                | <a href="#">Pter</a>               | 1.153 | 0.967 | 0.364852  | 0.635927  |
| 2943 | 10571007 | <a href="#">NM_001081269</a>       | <a href="#">234135</a>    | Wolf-Hirschhorn syndrome<br>candi         | <a href="#">Whsc1ll</a>            | 1.152 | 1.408 | 0.200862  | 0.462789  |
| 2944 | 10456363 | <a href="#">NM_010307</a>          | <a href="#">14680</a>     | guanine nucleotide binding pro            | <a href="#">Gnal</a>               | 1.152 | 1.631 | 0.145595  | 0.387145  |
| 2945 | 10584325 | <a href="#">NM_020518</a>          | <a href="#">57276</a>     | V-set and immunoglobulin<br>domai         | <a href="#">Vsig2</a>              | 1.152 | 2.599 | 0.0345897 | 0.157792  |
| 2946 | 10561337 | <a href="#">NM_028538</a>          | <a href="#">73430</a>     | RIKEN cDNA 1700049G17<br>gene             | <a href="#">1700049G17Rik</a>      | 1.152 | 1.232 | 0.256452  | 0.530714  |
| 2947 | 10401007 | <a href="#">NM_012024</a>          | <a href="#">26932</a>     | protein phosphatase 2, regulat            | <a href="#">Ppp2r5e</a>            | 1.152 | 1.911 | 0.0963563 | 0.30213   |
| 2948 | 10606730 | <a href="#">NM_001007578</a>       | <a href="#">278097</a>    | armadillo repeat containing, X            | <a href="#">Armcx6</a>             | 1.152 | 1.537 | 0.166846  | 0.417832  |
| 2949 | 10379989 | <a href="#">BC117001</a>           | <a href="#">66140</a>     | RIKEN cDNA 1110001A07<br>gene             | <a href="#">1110001A07Rik</a>      | 1.152 | 3.157 | 0.0153885 | 0.0920839 |
| 2950 | 10399407 | <a href="#">NM_012038</a>          | <a href="#">26950</a>     | visinin-like 1                            | <a href="#">Vsnl1</a>              | 1.152 | 1.157 | 0.283972  | 0.559215  |
| 2951 | 10347521 | <a href="#">NM_026846</a>          | <a href="#">68818</a>     | zinc finger, AN1 type domain 2            | <a href="#">Zfand2b</a>            | 1.152 | 1.569 | 0.159287  | 0.406366  |
| 2952 | 10449631 | <a href="#">NM_172618</a>          | <a href="#">224671</a>    | BTB (POZ) domain containing 9             | <a href="#">Btb9</a>               | 1.152 | 1.677 | 0.136134  | 0.372273  |
| 2953 | 10551365 | <a href="#">NM_019412</a>          | <a href="#">19153</a>     | periaxin                                  | <a href="#">Prx</a>                | 1.152 | 2.591 | 0.0350061 | 0.159     |
| 2954 | 10449999 | <a href="#">NM_009542</a>          | <a href="#">22643</a>     | zinc finger protein 101                   | <a href="#">Zfp101</a>             | 1.152 | 2.331 | 0.0514999 | 0.205     |
| 2955 | 10416848 |                                    |                           |                                           |                                    | 1.152 | 1.237 | 0.254908  | 0.529239  |
| 2956 | 10527896 | <a href="#">NM_001003909</a>       | <a href="#">70797</a>     | ankyrin repeat and IBR domain             | <a href="#">Ankib1</a>             | 1.151 | 1.531 | 0.168373  | 0.419736  |
| 2957 | 10436253 | <a href="#">NM_025483</a>          | <a href="#">66315</a>     | SUMO1/sentrin specific peptida            | <a href="#">Senp7</a>              | 1.151 | 1.568 | 0.159699  | 0.407016  |
| 2958 | 10533991 | <a href="#">XR_033706</a>          | <a href="#">665760</a>    | similar to Coiled-coil domain             | <a href="#">LOC665760</a>          | 1.151 | 0.723 | 0.492599  | 0.738532  |
| 2959 | 10389738 | <a href="#">NM_019505</a>          | <a href="#">56077</a>     | diacylglycerol kinase, epsilon            | <a href="#">Dgke</a>               | 1.151 | 0.784 | 0.4579    | 0.713313  |
| 2960 | 10477831 | <a href="#">BC027204</a>           | <a href="#">70873</a>     | RIKEN cDNA 4921517L17 gene                | <a href="#">4921517L17Rik</a>      | 1.151 | 2.99  | 0.0195368 | 0.108081  |
| 2961 | 10360270 | <a href="#">NM_178405</a>          | <a href="#">98660</a>     | ATPase, Na+/K+ transporting, a            | <a href="#">Atp1a2</a>             | 1.151 | 2.052 | 0.0781431 | 0.265936  |
| 2962 | 10369647 | <a href="#">NM_053183</a>          | <a href="#">94213</a>     | DEAD (Asp-Glu-Ala-Asp) box<br>pol         | <a href="#">Ddx50</a>              | 1.151 | 2.321 | 0.052228  | 0.206719  |
| 2963 | 10422781 | <a href="#">NM_030168</a>          | <a href="#">78757</a>     | RIKEN cDNA 4921505C17<br>gene             | <a href="#">4921505C17Rik</a>      | 1.151 | 3.062 | 0.0176125 | 0.100459  |
| 2964 | 10438708 | <a href="#">NM_008555</a>          | <a href="#">17174</a>     | mannan-binding lectin serine p            | <a href="#">Masp1</a>              | 1.151 | 1.631 | 0.145695  | 0.38722   |
| 2965 | 10589059 |                                    |                           |                                           |                                    | 1.151 | 1.89  | 0.0994987 | 0.30816   |
| 2966 | 10424392 | <a href="#">BC099672</a>           | <a href="#">320469</a>    | RIKEN cDNA 9930014A18<br>gene             | <a href="#">9930014A18Rik</a>      | 1.151 | 1.776 | 0.117746  | 0.342357  |
| 2967 | 10406334 | <a href="#">NM_030174</a>          | <a href="#">78771</a>     | multiple C2 domains, transmemb            | <a href="#">Mctpl</a>              | 1.151 | 1.685 | 0.134571  | 0.369832  |
| 2968 | 10531479 | <a href="#">ENSMUST00000101028</a> | <a href="#">619319</a>    | RIKEN cDNA 4932430I15 gene                | <a href="#">4932430I15Rik</a>      | 1.151 | 1.336 | 0.222175  | 0.491955  |

|      |          |                                    |                           |                                |                                    |       |       |           |           |
|------|----------|------------------------------------|---------------------------|--------------------------------|------------------------------------|-------|-------|-----------|-----------|
| 2969 | 10545672 | <a href="#">NM_008638</a>          | <a href="#">17768</a>     | methylenetetrahydrofolate dehy | <a href="#">Mthfd2</a>             | 1.15  | 0.935 | 0.380179  | 0.649784  |
| 2970 | 10376021 | <a href="#">NM_033144</a>          | <a href="#">20362</a>     | septin 8                       | <a href="#">Sept8</a>              | 1.15  | 3.221 | 0.0140441 | 0.0860473 |
| 2971 | 10385872 | <a href="#">NM_011396</a>          | <a href="#">20520</a>     | solute carrier family 22 (orga | <a href="#">Slc22a5</a>            | 1.15  | 0.82  | 0.438315  | 0.697399  |
| 2972 | 10478936 |                                    |                           |                                |                                    | 1.15  | 2.258 | 0.0574489 | 0.219537  |
| 2973 | 10524020 | <a href="#">NM_028223</a>          | <a href="#">72392</a>     | transmembrane protein 175      | <a href="#">Tmem175</a>            | 1.15  | 2.304 | 0.0535788 | 0.209946  |
| 2974 | 10507894 | <a href="#">NM_017475</a>          | <a href="#">54170</a>     | Ras-related GTP binding C      | <a href="#">Rragc</a>              | 1.15  | 2.413 | 0.0455623 | 0.188822  |
| 2975 | 10586384 | <a href="#">NM_016688</a>          | <a href="#">50996</a>     | programmed cell death protein  | <a href="#">Pcdcd7</a>             | 1.15  | 1.624 | 0.147045  | 0.388979  |
| 2976 | 10404294 | <a href="#">NM_008865</a>          | <a href="#">18776</a>     | prolactin family 3, subfamily  | <a href="#">Prl3b1</a>             | 1.15  | 1.356 | 0.216076  | 0.483104  |
| 2977 | 10362422 |                                    |                           |                                |                                    | 1.15  | 0.283 | 0.785369  | 0.912507  |
| 2978 | 10528120 | <a href="#">NM_011806</a>          | <a href="#">23857</a>     | cyclin D binding myb-like tran | <a href="#">Dmtf1</a>              | 1.15  | 1.765 | 0.11959   | 0.345865  |
| 2979 | 10458293 | <a href="#">NM_029669</a>          | <a href="#">76594</a>     | DnaJ (Hsp40) homolog, subfamil | <a href="#">Dnajc18</a>            | 1.15  | 1.386 | 0.207123  | 0.471587  |
| 2980 | 10440993 | <a href="#">NM_001081549</a>       | <a href="#">54720</a>     | regulator of calcineurin 1     | <a href="#">Rcan1</a>              | 1.15  | 0.963 | 0.366556  | 0.637472  |
| 2981 | 10480939 | <a href="#">NM_177841</a>          | <a href="#">329366</a>    | RIKEN cDNA 4932418E24 gene     | <a href="#">4932418E24Rik</a>      | 1.15  | 3.054 | 0.0178142 | 0.101281  |
| 2982 | 10499902 | <a href="#">NM_173070</a>          | <a href="#">229562</a>    | small proline-rich protein 4   | <a href="#">Sprr4</a>              | 1.15  | 2.275 | 0.0559824 | 0.21612   |
| 2983 | 10592719 | <a href="#">NM_178644</a>          | <a href="#">102644</a>    | OAF homolog (Drosophila)       | <a href="#">Oaf</a>                | 1.15  | 2.687 | 0.0303708 | 0.144892  |
| 2984 | 10594750 | <a href="#">ENSMUST00000054500</a> | <a href="#">244911</a>    | predicted gene, EG244911       | <a href="#">EG244911</a>           | 1.15  | 1.6   | 0.152385  | 0.396241  |
| 2985 | 10525831 |                                    |                           |                                |                                    | 1.149 | 0.686 | 0.514354  | 0.754563  |
| 2986 | 10428513 | <a href="#">NM_001081391</a>       | <a href="#">239420</a>    | CUB and Sushi multiple domains | <a href="#">Csmd3</a>              | 1.149 | 1.255 | 0.248741  | 0.522335  |
| 2987 | 10599893 | <a href="#">NM_008031</a>          | <a href="#">14265</a>     | fragile X mental retardation s | <a href="#">Fmr1</a>               | 1.149 | 2.73  | 0.0285036 | 0.138515  |
| 2988 | 10371319 | <a href="#">AK149870</a>           | <a href="#">100038465</a> | predicted gene, ENSMUSG0000007 | <a href="#">ENSMUSG00000074845</a> | 1.149 | 1.601 | 0.152117  | 0.395855  |
| 2989 | 10350377 | <a href="#">NM_172643</a>          | <a href="#">226470</a>    | zinc finger and BTB domain con | <a href="#">Zbtb41</a>             | 1.149 | 1.342 | 0.220376  | 0.489097  |
| 2990 | 10500837 | <a href="#">NM_133865</a>          | <a href="#">140917</a>    | DNA cross-link repair 1B, PSO2 | <a href="#">Dclre1b</a>            | 1.149 | 1.967 | 0.0886724 | 0.286953  |
| 2991 | 10417887 | <a href="#">BC119816</a>           | <a href="#">74843</a>     | zinc finger, MYND domain conta | <a href="#">Zmynd17</a>            | 1.149 | 1.887 | 0.0999113 | 0.308984  |
| 2992 | 10519140 | <a href="#">NM_011985</a>          | <a href="#">26561</a>     | matrix metalloproteinase 23    | <a href="#">Mmp23</a>              | 1.149 | 2.665 | 0.0313506 | 0.148063  |
| 2993 | 10479550 | <a href="#">BC058516</a>           | <a href="#">66496</a>     | RIKEN cDNA 2700038C09 gene     | <a href="#">2700038C09Rik</a>      | 1.149 | 2.592 | 0.0349514 | 0.158825  |
| 2994 | 10565738 | <a href="#">NM_172280</a>          | <a href="#">233545</a>    | RIKEN cDNA 2210018M11 gene     | <a href="#">2210018M11Rik</a>      | 1.149 | 2.314 | 0.0527729 | 0.207945  |
| 2995 | 10503551 | <a href="#">NM_152825</a>          | <a href="#">77593</a>     | ubiquitin specific petidase 45 | <a href="#">Usp45</a>              | 1.149 | 1.898 | 0.0982085 | 0.30582   |
| 2996 | 10593213 | <a href="#">NM_144948</a>          | <a href="#">67010</a>     | RNA binding motif protein 7    | <a href="#">Rbm7</a>               | 1.149 | 2.243 | 0.0586986 | 0.222894  |
| 2997 | 10438169 |                                    |                           |                                |                                    | 1.149 | 1.278 | 0.240899  | 0.513879  |
| 2998 | 10376408 | <a href="#">NM_001011818</a>       | <a href="#">258064</a>    | olfactory receptor 316         | <a href="#">Olfr316</a>            | 1.149 | 0.716 | 0.496572  | 0.74102   |
| 2999 | 10360227 | <a href="#">NM_011063</a>          | <a href="#">18611</a>     | phosphoprotein enriched in ast | <a href="#">Pea15a</a>             | 1.149 | 1.807 | 0.112429  | 0.332128  |
| 3000 | 10561810 | <a href="#">NM_011748</a>          | <a href="#">243906</a>    | zinc finger protein 14         | <a href="#">Zfp14</a>              | 1.148 | 2.135 | 0.0689911 | 0.246119  |
| 3001 | 10455813 | <a href="#">NM_010721</a>          | <a href="#">16906</a>     | lamin B1                       | <a href="#">Lmnb1</a>              | 1.148 | 2.35  | 0.0500117 | 0.201094  |
| 3002 | 10434089 | <a href="#">ENSMUST00000056962</a> | <a href="#">72315</a>     | RIKEN cDNA 2310015A05 gene     | <a href="#">2310015A05Rik</a>      | 1.148 | 1.837 | 0.107579  | 0.323293  |
| 3003 | 10392261 | <a href="#">NM_025481</a>          | <a href="#">66313</a>     | SMAD specific E3 ubiquitin pro | <a href="#">Smurf2</a>             | 1.148 | 2.2   | 0.0625936 | 0.23162   |
| 3004 | 10381477 | <a href="#">NM_144831</a>          | <a href="#">217207</a>    | DEAH (Asp-Glu-Ala-His) box pol | <a href="#">Dhx8</a>               | 1.148 | 2.112 | 0.0713673 | 0.250953  |
| 3005 | 10515536 | <a href="#">NM_146152</a>          | <a href="#">230673</a>    | importin 13                    | <a href="#">Ipo13</a>              | 1.148 | 2.297 | 0.0541604 | 0.21152   |
| 3006 | 10529819 | <a href="#">NM_008009</a>          | <a href="#">14181</a>     | fibroblast growth factor bindi | <a href="#">Fgfbp1</a>             | 1.148 | 0.578 | 0.580804  | 0.799773  |
| 3007 | 10498584 | <a href="#">ENSMUST00000054825</a> | <a href="#">109222</a>    | retinoic acid receptor respond | <a href="#">Rarres1</a>            | 1.148 | 0.987 | 0.355523  | 0.628098  |
| 3008 | 10354897 | <a href="#">NM_172406</a>          | <a href="#">70827</a>     | trafficking protein, kinesin b | <a href="#">Trak2</a>              | 1.148 | 1.534 | 0.167771  | 0.419086  |
| 3009 | 10479294 |                                    |                           |                                |                                    | 1.148 | 1.437 | 0.192551  | 0.452065  |
| 3010 | 10477012 | <a href="#">NM_008019</a>          | <a href="#">14225</a>     | FK506 binding protein 1a       | <a href="#">Fkbp1a</a>             | 1.148 | 2.285 | 0.0551619 | 0.214244  |
| 3011 | 10578253 | <a href="#">NM_145841</a>          | <a href="#">244431</a>    | sarcoglycan zeta               | <a href="#">Sgcz</a>               | 1.148 | 1.733 | 0.125449  | 0.354707  |
| 3012 | 10491615 | <a href="#">ENSMUST00000057272</a> | <a href="#">229227</a>    | RIKEN cDNA 4932438A13 gene     | <a href="#">4932438A13Rik</a>      | 1.148 | 1.619 | 0.148185  | 0.390374  |
| 3013 | 10513884 | <a href="#">NM_011599</a>          | <a href="#">21885</a>     | transducin-like enhancer of sp | <a href="#">Tle1</a>               | 1.148 | 1.308 | 0.231105  | 0.501886  |
| 3014 | 10346943 | <a href="#">NM_133828</a>          | <a href="#">12912</a>     | cAMP responsive element bindin | <a href="#">Creb1</a>              | 1.148 | 2.014 | 0.0826487 | 0.275157  |
| 3015 | 10358091 | <a href="#">NM_173437</a>          | <a href="#">215690</a>    | neuron navigator 1             | <a href="#">Nav1</a>               | 1.148 | 1.558 | 0.161993  | 0.410397  |
| 3016 | 10511901 | <a href="#">NM_001012450</a>       | <a href="#">140577</a>    | ankyrin repeat domain 6        | <a href="#">Ankrd6</a>             | 1.148 | 2.503 | 0.0398804 | 0.173611  |
| 3017 | 10522467 | <a href="#">NM_026878</a>          | <a href="#">68939</a>     | RAS-like, family 11, member B  | <a href="#">Rasl1b</a>             | 1.148 | 1.718 | 0.1283    | 0.359233  |
| 3018 | 10569429 | <a href="#">NM_009876</a>          | <a href="#">12577</a>     | cyclin-dependent kinase inhibi | <a href="#">Cdkn1c</a>             | 1.147 | 1.37  | 0.211857  | 0.477389  |

|      |          |                                    |                        |                                |                               |       |       |           |          |
|------|----------|------------------------------------|------------------------|--------------------------------|-------------------------------|-------|-------|-----------|----------|
| 3019 | 10521391 | <a href="#">NM_030721</a>          | <a href="#">80911</a>  | acyl-Coenzyme A oxidase 3, pri | <a href="#">Acox3</a>         | 1.147 | 2.448 | 0.0432315 | 0.182671 |
| 3020 | 10376998 | <a href="#">NM_178656</a>          | <a href="#">193003</a> | RIKEN cDNA A530088H08 gene     | <a href="#">A530088H08Rik</a> | 1.147 | 2.479 | 0.0413224 | 0.177398 |
| 3021 | 10456437 |                                    |                        |                                |                               | 1.147 | 1.385 | 0.207423  | 0.47189  |
| 3022 | 10362628 | <a href="#">XR_033147</a>          | <a href="#">667964</a> | similar to C130022K22Rik prote | <a href="#">LOC667964</a>     | 1.147 | 0.529 | 0.61266   | 0.820438 |
| 3023 | 10557738 | <a href="#">NM_007795</a>          | <a href="#">13019</a>  | cardiotrophin 1                | <a href="#">Ctfl</a>          | 1.147 | 1.418 | 0.197984  | 0.458849 |
| 3024 | 10546891 | <a href="#">NM_133926</a>          | <a href="#">52163</a>  | calcium/calmodulin-dependent p | <a href="#">Camk1</a>         | 1.147 | 1.791 | 0.11515   | 0.337402 |
| 3025 | 10535273 | <a href="#">NM_010302</a>          | <a href="#">14673</a>  | guanine nucleotide binding pro | <a href="#">Gna12</a>         | 1.147 | 2.123 | 0.0702528 | 0.248316 |
| 3026 | 10543879 | <a href="#">NM_001013366</a>       | <a href="#">101240</a> | WD repeat domain 91            | <a href="#">Wdr91</a>         | 1.147 | 1.417 | 0.198088  | 0.458849 |
| 3027 | 10485687 | <a href="#">NM_029790</a>          | <a href="#">76894</a>  | methytransferase 5 domain con  | <a href="#">Mett5d1</a>       | 1.147 | 1.849 | 0.105647  | 0.320213 |
| 3028 | 10491825 | <a href="#">BC092533</a>           | <a href="#">269423</a> | RIKEN cDNA 3110057O12 gene     | <a href="#">3110057O12Rik</a> | 1.147 | 2.063 | 0.076785  | 0.262747 |
| 3029 | 10527158 | <a href="#">NM_007984</a>          | <a href="#">14086</a>  | fascin homolog 1, actin bundli | <a href="#">Fscn1</a>         | 1.147 | 1.622 | 0.147609  | 0.389693 |
| 3030 | 10591622 | <a href="#">NM_177030</a>          | <a href="#">319899</a> | dedicator of cytokinesis 6     | <a href="#">Dock6</a>         | 1.147 | 1.663 | 0.139028  | 0.377126 |
| 3031 | 10522596 | <a href="#">NM_011626</a>          | <a href="#">21982</a>  | transmembrane protein 165      | <a href="#">Tmem165</a>       | 1.147 | 2.195 | 0.0631289 | 0.232827 |
| 3032 | 10362534 | <a href="#">ENSMUST00000062667</a> | <a href="#">320504</a> | RIKEN cDNA 5930403N24 gene     | <a href="#">5930403N24Rik</a> | 1.147 | 1.531 | 0.168317  | 0.419736 |
| 3033 | 10584229 |                                    |                        |                                |                               | 1.147 | 0.78  | 0.460335  | 0.71495  |
| 3034 | 10605884 | <a href="#">NM_052976</a>          | <a href="#">94190</a>  | oligophrenin 1                 | <a href="#">Ophn1</a>         | 1.146 | 1.333 | 0.223124  | 0.49298  |
| 3035 | 10539104 | <a href="#">BC066053</a>           | <a href="#">68364</a>  | RIKEN cDNA 0610030E20 gene     | <a href="#">0610030E20Rik</a> | 1.146 | 1.911 | 0.0964193 | 0.302252 |
| 3036 | 10470954 | <a href="#">NM_177725</a>          | <a href="#">241296</a> | leucine rich repeat containing | <a href="#">Lrrc8a</a>        | 1.146 | 2.116 | 0.0709782 | 0.250137 |
| 3037 | 10431722 | <a href="#">NM_001033275</a>       | <a href="#">223827</a> | glycosyltransferase 8 domain c | <a href="#">Glt8d3</a>        | 1.146 | 1.614 | 0.149234  | 0.391598 |
| 3038 | 10587315 | <a href="#">NM_010357</a>          | <a href="#">14860</a>  | glutathione S-transferase, alp | <a href="#">Gsta4</a>         | 1.146 | 0.694 | 0.509218  | 0.750516 |
| 3039 | 10512251 | <a href="#">NM_001085515</a>       | <a href="#">329828</a> | expressed sequence AI464131    | <a href="#">AI464131</a>      | 1.146 | 1.992 | 0.0854278 | 0.280581 |
| 3040 | 10419790 | <a href="#">NM_010590</a>          | <a href="#">16475</a>  | ajuba                          | <a href="#">Jub</a>           | 1.146 | 2.774 | 0.0267233 | 0.132919 |
| 3041 | 10595981 | <a href="#">NM_008624</a>          | <a href="#">17532</a>  | muscle and microspikes RAS     | <a href="#">Mras</a>          | 1.146 | 1.452 | 0.188687  | 0.446774 |
| 3042 | 10477637 | <a href="#">NM_025735</a>          | <a href="#">66734</a>  | microtubule-associated protein | <a href="#">Map1lc3a</a>      | 1.146 | 1.46  | 0.186519  | 0.444867 |
| 3043 | 10480064 | <a href="#">NM_015792</a>          | <a href="#">50755</a>  | F-box protein 18               | <a href="#">Fbxo18</a>        | 1.146 | 2.218 | 0.0609547 | 0.227869 |
| 3044 | 10394791 | <a href="#">ENSMUST00000050990</a> | <a href="#">236260</a> | hypothetical protein LOC236260 | <a href="#">LOC236260</a>     | 1.146 | 1.115 | 0.300576  | 0.576795 |
| 3045 | 10515848 | <a href="#">NM_013848</a>          | <a href="#">27028</a>  | erythroblast membrane-associa  | <a href="#">Ermap</a>         | 1.146 | 0.958 | 0.368951  | 0.639697 |
| 3046 | 10349872 |                                    |                        |                                |                               | 1.146 | 1.708 | 0.130115  | 0.36185  |
| 3047 | 10535381 | <a href="#">NM_007393</a>          | <a href="#">11461</a>  | actin, beta, cytoplasmic       | <a href="#">Actb</a>          | 1.146 | 2.574 | 0.0358675 | 0.161427 |
| 3048 | 10566203 | <a href="#">NM_001011847</a>       | <a href="#">258139</a> | olfactory receptor 591         | <a href="#">Olfr591</a>       | 1.146 | 1.62  | 0.148055  | 0.390187 |
| 3049 | 10529497 | <a href="#">NM_194344</a>          | <a href="#">231147</a> | SH3 domain and tetratricopepti | <a href="#">Sh3tc1</a>        | 1.146 | 2.576 | 0.0357723 | 0.16117  |
| 3050 | 10547993 |                                    |                        |                                |                               | 1.146 | 1.933 | 0.0932191 | 0.295866 |
| 3051 | 10450059 | <a href="#">NM_019420</a>          | <a href="#">54218</a>  | UDP-Gal:betaGlcNAc beta 1,3-ga | <a href="#">B3galt4</a>       | 1.145 | 1.866 | 0.103122  | 0.315361 |
| 3052 | 10449971 | <a href="#">BC056193</a>           | <a href="#">73451</a>  | RIKEN cDNA 1700065O13 gene     | <a href="#">1700065O13Rik</a> | 1.145 | 2.081 | 0.0747586 | 0.258738 |
| 3053 | 10465132 | <a href="#">NM_011379</a>          | <a href="#">20469</a>  | signal-induced proliferation a | <a href="#">Sipa1</a>         | 1.145 | 2.226 | 0.0602689 | 0.226426 |
| 3054 | 10515700 | <a href="#">ENSMUST00000075406</a> | <a href="#">230676</a> | cDNA sequence BC059842         | <a href="#">BC059842</a>      | 1.145 | 1.665 | 0.138688  | 0.376676 |
| 3055 | 10566488 | <a href="#">NM_018880</a>          | <a href="#">55992</a>  | tripartite motif-containing 3  | <a href="#">Trim3</a>         | 1.145 | 1.866 | 0.103007  | 0.315188 |
| 3056 | 10370946 | <a href="#">NM_172457</a>          | <a href="#">208228</a> | MOB1, Mps One Binder kinase ac | <a href="#">Mobk12a</a>       | 1.145 | 2.273 | 0.0561638 | 0.216623 |
| 3057 | 10403750 | <a href="#">NM_025479</a>          | <a href="#">66308</a>  | RIKEN cDNA 2810021B07 gene     | <a href="#">2810021B07Rik</a> | 1.145 | 2.589 | 0.0350686 | 0.159084 |
| 3058 | 10489909 | <a href="#">NM_023230</a>          | <a href="#">66589</a>  | ubiquitin-conjugating enzyme E | <a href="#">Ube2v1</a>        | 1.145 | 0.124 | 0.904451  | 0.962829 |
| 3059 | 10358476 | <a href="#">NM_021400</a>          | <a href="#">96875</a>  | proteoglycan 4 (megakaryocyte  | <a href="#">Prg4</a>          | 1.145 | 1.183 | 0.274455  | 0.54916  |
| 3060 | 10432771 | <a href="#">NM_130858</a>          | <a href="#">104079</a> | neurexophilin 3                | <a href="#">Nxph3</a>         | 1.145 | 1.992 | 0.348771  | 0.622419 |
| 3061 | 10396176 | <a href="#">NM_008856</a>          | <a href="#">18755</a>  | protein kinase C, eta          | <a href="#">Prkch</a>         | 1.145 | 2.224 | 0.0604069 | 0.226889 |
| 3062 | 10396402 | <a href="#">NM_008856</a>          | <a href="#">18755</a>  | protein kinase C, eta          | <a href="#">Prkch</a>         | 1.145 | 1.778 | 0.117338  | 0.341384 |
| 3063 | 10543695 |                                    |                        |                                |                               | 1.145 | 2.06  | 0.0772161 | 0.263757 |
| 3064 | 10511541 | <a href="#">NM_001081201</a>       | <a href="#">381510</a> | dpy-19-like 4 (C. elegans)     | <a href="#">Dpy19l4</a>       | 1.144 | 0.889 | 0.402854  | 0.668022 |
| 3065 | 10399314 | <a href="#">NM_001033488</a>       | <a href="#">432628</a> | gene model 1964, (NCBI)        | <a href="#">Gm1964</a>        | 1.144 | 2.079 | 0.0750099 | 0.258984 |
| 3066 | 10557831 | <a href="#">NM_026370</a>          | <a href="#">67773</a>  | MYST histone acetyltransferase | <a href="#">Myst1</a>         | 1.144 | 2.243 | 0.0587008 | 0.222894 |
| 3067 | 10354807 | <a href="#">NM_030211</a>          | <a href="#">51960</a>  | potassium channel tetramerisat | <a href="#">Kctd18</a>        | 1.144 | 1.098 | 0.30762   | 0.584192 |
| 3068 | 10568131 | <a href="#">NM_030240</a>          | <a href="#">67278</a>  | RIKEN cDNA 2900092E17 gene     | <a href="#">2900092E17Rik</a> | 1.144 | 1.954 | 0.0903843 | 0.290394 |
| 3069 | 10600031 | <a href="#">AK138582</a>           | <a href="#">67048</a>  | RIKEN cDNA 2610030H06 gene     | <a href="#">2610030H06Rik</a> | 1.144 | 1.034 | 0.334379  | 0.60995  |

|      |          |                                    |                        | gene                           |                                    |       |       |            |           |
|------|----------|------------------------------------|------------------------|--------------------------------|------------------------------------|-------|-------|------------|-----------|
| 3070 | 10582241 | <a href="#">NM_080855</a>          | <a href="#">142682</a> | zinc finger, CCHC domain conta | <a href="#">Zcchc14</a>            | 1.144 | 2.042 | 0.079327   | 0.268109  |
| 3071 | 10431726 | <a href="#">NM_024189</a>          | <a href="#">67057</a>  | YY1 associated factor 2        | <a href="#">Yaf2</a>               | 1.144 | 2.52  | 0.0388827  | 0.170745  |
| 3072 | 10585610 | <a href="#">NM_019651</a>          | <a href="#">56294</a>  | protein tyrosine phosphatase,  | <a href="#">Ptpn9</a>              | 1.144 | 1.381 | 0.208641   | 0.47344   |
| 3073 | 10474687 |                                    |                        |                                |                                    | 1.144 | 3.485 | 0.00972123 | 0.0667356 |
| 3074 | 10502058 | <a href="#">NM_145964</a>          | <a href="#">211556</a> | cDNA sequence BC002199         | <a href="#">BC002199</a>           | 1.144 | 2.326 | 0.0518595  | 0.205957  |
| 3075 | 10535759 | <a href="#">NM_080795</a>          | <a href="#">140887</a> | ligand of numb-protein X 2     | <a href="#">Lnx2</a>               | 1.144 | 1.667 | 0.138251   | 0.376165  |
| 3076 | 10388902 | <a href="#">NM_010708</a>          | <a href="#">16859</a>  | lectin, galactose binding, sol | <a href="#">Lgals9</a>             | 1.144 | 2.093 | 0.0734607  | 0.255968  |
| 3077 | 10347460 | <a href="#">NM_001014974</a>       | <a href="#">67534</a>  | tubulin tyrosine ligase-like f | <a href="#">Ttll4</a>              | 1.144 | 1.62  | 0.148026   | 0.390187  |
| 3078 | 10351961 | <a href="#">NM_207137</a>          | <a href="#">258238</a> | olfactory receptor 417         | <a href="#">Olfr417</a>            | 1.144 | 1.326 | 0.225158   | 0.495241  |
| 3079 | 10544462 | <a href="#">NM_029930</a>          | <a href="#">77574</a>  | RIKEN cDNA 3321401G04 gene     | <a href="#">3321401G04Rik</a>      | 1.144 | 2.796 | 0.0258793  | 0.130308  |
| 3080 | 10352722 | <a href="#">ENSMUST00000097438</a> | <a href="#">78721</a>  | RIKEN cDNA D730003I15 gene     | <a href="#">D730003I15Rik</a>      | 1.144 | 2.145 | 0.0679314  | 0.243365  |
| 3081 | 10553646 | <a href="#">NM_010418</a>          | <a href="#">15204</a>  | hect (homologous to the E6-AP  | <a href="#">Herc2</a>              | 1.144 | 2.557 | 0.0367908  | 0.164254  |
| 3082 | 10552632 | <a href="#">ENSMUST00000107938</a> | <a href="#">243961</a> | SH3/ankyrin domain gene 1      | <a href="#">Shank1</a>             | 1.143 | 2.027 | 0.0810937  | 0.271716  |
| 3083 | 10447708 | <a href="#">NM_021881</a>          | <a href="#">19317</a>  | quaking                        | <a href="#">Qk</a>                 | 1.143 | 2.566 | 0.0363208  | 0.162774  |
| 3084 | 10496457 | <a href="#">ENSMUST00000090166</a> | <a href="#">229871</a> | alcohol dehydrogenase 6B (clas | <a href="#">Adh6b</a>              | 1.143 | 1.172 | 0.278528   | 0.553444  |
| 3085 | 10555438 | <a href="#">NM_199012</a>          | <a href="#">207278</a> | FCH and double SH3 domains 2   | <a href="#">Fchsd2</a>             | 1.143 | 2.681 | 0.0306544  | 0.145769  |
| 3086 | 10606186 | <a href="#">NM_009197</a>          | <a href="#">20502</a>  | solute carrier family 16 (mono | <a href="#">Slc16a2</a>            | 1.143 | 1.511 | 0.173182   | 0.425638  |
| 3087 | 10523255 | <a href="#">NM_175096</a>          | <a href="#">52331</a>  | starch binding domain 1        | <a href="#">Stbd1</a>              | 1.143 | 1.225 | 0.259214   | 0.533466  |
| 3088 | 10401852 | <a href="#">NM_181815</a>          | <a href="#">75216</a>  | RIKEN cDNA 4930534B04 gene     | <a href="#">4930534B04Rik</a>      | 1.143 | 1.428 | 0.195188   | 0.455424  |
| 3089 | 10505734 | <a href="#">NM_029967</a>          | <a href="#">77739</a>  | ADAMTS-like 1                  | <a href="#">Adamts1</a>            | 1.143 | 1.716 | 0.128547   | 0.359524  |
| 3090 | 10599884 |                                    |                        |                                |                                    | 1.143 | 1.265 | 0.245372   | 0.518491  |
| 3091 | 10540923 | <a href="#">NM_023290</a>          | <a href="#">67027</a>  | makorin, ring finger protein,  | <a href="#">Mkrn2</a>              | 1.143 | 1.78  | 0.116955   | 0.340665  |
| 3092 | 10399376 | <a href="#">ENSMUST00000062469</a> | <a href="#">319503</a> | RIKEN cDNA 9930038B18 gene     | <a href="#">9930038B18Rik</a>      | 1.143 | 2.347 | 0.0502876  | 0.201609  |
| 3093 | 10572800 | <a href="#">NM_008452</a>          | <a href="#">16598</a>  | Kruppel-like factor 2 (lung)   | <a href="#">Klf2</a>               | 1.143 | 2.691 | 0.0302042  | 0.144448  |
| 3094 | 10547436 | <a href="#">NM_198703</a>          | <a href="#">232341</a> | WNK lysine deficient protein k | <a href="#">Wnk1</a>               | 1.143 | 2.762 | 0.0272018  | 0.134413  |
| 3095 | 10388969 |                                    |                        |                                |                                    | 1.143 | 3.177 | 0.0149525  | 0.0900988 |
| 3096 | 10350331 | <a href="#">NM_177643</a>          | <a href="#">226442</a> | zinc finger protein 281        | <a href="#">Zfp281</a>             | 1.143 | 1.563 | 0.160839   | 0.408621  |
| 3097 | 10359266 | <a href="#">NM_001085376</a>       | <a href="#">23850</a>  | pappalysin 2                   | <a href="#">Pappa2</a>             | 1.143 | 2.355 | 0.0496747  | 0.200281  |
| 3098 | 10359870 | <a href="#">NM_183355</a>          | <a href="#">18514</a>  | pre B-cell leukemia transcript | <a href="#">Pbx1</a>               | 1.143 | 2.051 | 0.0782205  | 0.266113  |
| 3099 | 10501183 | <a href="#">BC060136</a>           | <a href="#">329735</a> | RIKEN cDNA 4933431E20 gene     | <a href="#">4933431E20Rik</a>      | 1.142 | 1.229 | 0.257589   | 0.531672  |
| 3100 | 10534253 | <a href="#">NM_001081462</a>       | <a href="#">57080</a>  | general transcription factor I | <a href="#">Gtf2ird1</a>           | 1.142 | 1.534 | 0.167577   | 0.418725  |
| 3101 | 10492556 | <a href="#">ENSMUST00000054551</a> | <a href="#">68725</a>  | RIKEN cDNA 1110032F04 gene     | <a href="#">1110032F04Rik</a>      | 1.142 | 1.241 | 0.253605   | 0.527883  |
| 3102 | 10581996 | <a href="#">NM_029441</a>          | <a href="#">75796</a>  | chromodomain protein, Y chromo | <a href="#">Cdy12</a>              | 1.142 | 1.66  | 0.139681   | 0.378012  |
| 3103 | 10511631 | <a href="#">NM_145947</a>          | <a href="#">208890</a> | solute carrier family 26, memb | <a href="#">Slc26a7</a>            | 1.142 | 0.953 | 0.371285   | 0.64202   |
| 3104 | 10438778 | <a href="#">AK142524</a>           | <a href="#">224058</a> | transmembrane protein 207      | <a href="#">Tmem207</a>            | 1.142 | 1.575 | 0.158039   | 0.405065  |
| 3105 | 10349527 |                                    |                        |                                |                                    | 1.142 | 2.318 | 0.0524997  | 0.207254  |
| 3106 | 10405174 | <a href="#">NM_029173</a>          | <a href="#">75124</a>  | nucleoredoxin-like 2           | <a href="#">Nxn12</a>              | 1.142 | 1.958 | 0.0898946  | 0.289349  |
| 3107 | 10389717 |                                    |                        |                                |                                    | 1.142 | 1.122 | 0.297728   | 0.5738    |
| 3108 | 10398615 | <a href="#">ENSMUST00000084967</a> | <a href="#">791310</a> | predicted gene, ENSMUSG0000006 | <a href="#">ENSMUSG00000066331</a> | 1.142 | 1.544 | 0.165215   | 0.415326  |
| 3109 | 10416777 | <a href="#">NM_009769</a>          | <a href="#">12224</a>  | Kruppel-like factor 5          | <a href="#">Klf5</a>               | 1.142 | 2.682 | 0.0305786  | 0.145587  |
| 3110 | 10357696 |                                    |                        |                                |                                    | 1.141 | 2.136 | 0.0688603  | 0.245818  |
| 3111 | 10588007 | <a href="#">NM_178667</a>          | <a href="#">211586</a> | transcription factor Dp 2      | <a href="#">Tfdp2</a>              | 1.141 | 1.226 | 0.258664   | 0.532799  |
| 3112 | 10375570 | <a href="#">NM_207574</a>          | <a href="#">404337</a> | olfactory receptor 1383        | <a href="#">Olfr1383</a>           | 1.141 | 2.166 | 0.0659217  | 0.239534  |
| 3113 | 10380566 | <a href="#">NM_153104</a>          | <a href="#">237928</a> | phosphatase, orphan 1          | <a href="#">Phosphol1</a>          | 1.141 | 2.2   | 0.0625698  | 0.231614  |
| 3114 | 10445688 | <a href="#">NM_001081636</a>       | <a href="#">12445</a>  | cyclin D3                      | <a href="#">Cnd3</a>               | 1.141 | 2.277 | 0.055782   | 0.215622  |
| 3115 | 10414545 | <a href="#">NM_203508</a>          | <a href="#">219026</a> | gene model 75, (NCBI)          | <a href="#">Gm75</a>               | 1.141 | 1.084 | 0.313184   | 0.589668  |
| 3116 | 10500813 | <a href="#">NM_010432</a>          | <a href="#">15257</a>  | homeodomain interacting protei | <a href="#">Hipk1</a>              | 1.141 | 2.516 | 0.0390754  | 0.171271  |
| 3117 | 10458755 |                                    |                        |                                |                                    | 1.141 | 1.015 | 0.342985   | 0.617132  |
| 3118 | 10592655 | <a href="#">NM_027144</a>          | <a href="#">69632</a>  | Rho guanine nucleotide exchang | <a href="#">Arhgef12</a>           | 1.141 | 1.815 | 0.111073   | 0.329804  |
| 3119 | 10566213 | <a href="#">NM_001011854</a>       | <a href="#">258156</a> | olfactory receptor 605         | <a href="#">Olfr605</a>            | 1.141 | 1.036 | 0.333866   | 0.609556  |
| 3120 | 10354286 | <a href="#">NM_023645</a>          | <a href="#">72050</a>  | KDEL (Lys-Asp-Glu-Leu) contain | <a href="#">Kdelc1</a>             | 1.141 | 1.658 | 0.13992    | 0.378322  |

|      |          |                                    |                        |                                |                               |       |       |            |           |
|------|----------|------------------------------------|------------------------|--------------------------------|-------------------------------|-------|-------|------------|-----------|
| 3121 | 10562657 | <a href="#">BC068175</a>           | <a href="#">434179</a> | predicted gene, EG434179       | <a href="#">EG434179</a>      | 1.141 | 0.812 | 0.443012   | 0.701704  |
| 3122 | 10377508 | <a href="#">NM_001024206</a>       | <a href="#">245828</a> | trafficking protein particle c | <a href="#">Trappe1</a>       | 1.141 | 1.699 | 0.131871   | 0.364815  |
| 3123 | 10575976 | <a href="#">NM_030209</a>          | <a href="#">78892</a>  | cysteine-rich secretory protei | <a href="#">Crispld2</a>      | 1.141 | 0.782 | 0.459018   | 0.7139    |
| 3124 | 10558345 | <a href="#">NM_001033420</a>       | <a href="#">330662</a> | dedicator of cytokinesis 1     | <a href="#">Dock1</a>         | 1.141 | 1.587 | 0.155306   | 0.400794  |
| 3125 | 10473281 | <a href="#">NM_008402</a>          | <a href="#">16410</a>  | integrin alpha V               | <a href="#">Itgav</a>         | 1.141 | 1.603 | 0.151695   | 0.395641  |
| 3126 | 10404792 | <a href="#">NM_198419</a>          | <a href="#">218194</a> | phosphatase and actin regulato | <a href="#">Phactr1</a>       | 1.141 | 2.916 | 0.0217444  | 0.115868  |
| 3127 | 10461400 |                                    |                        |                                |                               | 1.141 | 2.548 | 0.0372614  | 0.165996  |
| 3128 | 10379652 | <a href="#">AJ007734</a>           | <a href="#">103729</a> | expressed sequence AI450353    | <a href="#">AI450353</a>      | 1.141 | 1.293 | 0.235813   | 0.507639  |
| 3129 | 10421581 | <a href="#">NM_001033439</a>       | <a href="#">380916</a> | leucine-rich repeats and calpo | <a href="#">Lrch1</a>         | 1.14  | 1.321 | 0.2269     | 0.497571  |
| 3130 | 10515385 | <a href="#">NM_009478</a>          | <a href="#">22275</a>  | uroporphyrinogen decarboxylase | <a href="#">Urod</a>          | 1.14  | 2.262 | 0.0570439  | 0.218414  |
| 3131 | 10349249 | <a href="#">NM_001081276</a>       | <a href="#">76707</a>  | CLIP associating protein 1     | <a href="#">Clasp1</a>        | 1.14  | 2.013 | 0.0827849  | 0.275524  |
| 3132 | 10561453 | <a href="#">NM_011756</a>          | <a href="#">22695</a>  | zinc finger protein 36         | <a href="#">Zfp36</a>         | 1.14  | 1.115 | 0.300591   | 0.576795  |
| 3133 | 10606735 | <a href="#">NM_026139</a>          | <a href="#">67416</a>  | armadillo repeat containing, X | <a href="#">Armcx2</a>        | 1.14  | 1.609 | 0.150312   | 0.393487  |
| 3134 | 10561702 | <a href="#">NM_001033525</a>       | <a href="#">52150</a>  | potassium inwardly-rectifying  | <a href="#">Kcnk6</a>         | 1.14  | 2.081 | 0.0748512  | 0.258816  |
| 3135 | 10468329 | <a href="#">NM_175360</a>          | <a href="#">108689</a> | oligonucleotide/oligosaccharid | <a href="#">Obfc1</a>         | 1.14  | 1.874 | 0.101826   | 0.312711  |
| 3136 | 10607832 | <a href="#">NM_019773</a>          | <a href="#">56382</a>  | RAB9, member RAS oncogene fami | <a href="#">Rab9</a>          | 1.14  | 2.236 | 0.0593417  | 0.224338  |
| 3137 | 10395831 | <a href="#">NM_001037756</a>       | <a href="#">52592</a>  | breast cancer metastasis-suppr | <a href="#">Brms1l</a>        | 1.14  | 1.683 | 0.134959   | 0.370305  |
| 3138 | 10556456 | <a href="#">ENSMUST00000069256</a> | <a href="#">269987</a> | RIKEN cDNA 2610024B07 gene     | <a href="#">2610024B07Rik</a> | 1.14  | 2.47  | 0.0418581  | 0.178653  |
| 3139 | 10351703 | <a href="#">NM_009938</a>          | <a href="#">12847</a>  | coatomer protein complex subun | <a href="#">Copa</a>          | 1.14  | 2.277 | 0.0557673  | 0.215622  |
| 3140 | 10593318 |                                    |                        |                                |                               | 1.14  | 2.044 | 0.0790583  | 0.267794  |
| 3141 | 10531675 | <a href="#">ENSMUST00000094578</a> | <a href="#">69162</a>  | SEC31 homolog A (S. cerevisiae | <a href="#">Sec31a</a>        | 1.14  | 1.939 | 0.0924818  | 0.294729  |
| 3142 | 10415662 | <a href="#">NM_027764</a>          | <a href="#">71330</a>  | regulator of chromosome conden | <a href="#">Rcbt1</a>         | 1.14  | 1.82  | 0.110266   | 0.328467  |
| 3143 | 10459799 | <a href="#">DQ284430</a>           | <a href="#">75632</a>  | RIKEN cDNA 1700003O11 gene     | <a href="#">1700003O11Rik</a> | 1.14  | 1.601 | 0.152085   | 0.395831  |
| 3144 | 10364324 |                                    |                        |                                |                               | 1.14  | 2.015 | 0.08253    | 0.274805  |
| 3145 | 10601266 | <a href="#">ENSMUST00000050654</a> | <a href="#">382231</a> | RIKEN cDNA 8030474K03 gene     | <a href="#">8030474K03Rik</a> | 1.14  | 2.456 | 0.0427614  | 0.181264  |
| 3146 | 10355534 |                                    |                        |                                |                               | 1.14  | 3.101 | 0.0166654  | 0.0970991 |
| 3147 | 10473432 | <a href="#">NM_001081260</a>       | <a href="#">228140</a> | tankyrase 1 binding protein 1  | <a href="#">Tnks1bp1</a>      | 1.14  | 2.279 | 0.0555994  | 0.215288  |
| 3148 | 10358191 | <a href="#">NM_001081360</a>       | <a href="#">67886</a>  | calmodulin regulated spectrin- | <a href="#">Camsap11l</a>     | 1.14  | 2.109 | 0.0717349  | 0.251634  |
| 3149 | 10427293 | <a href="#">NM_010465</a>          | <a href="#">15425</a>  | homeo box C6                   | <a href="#">Hoxc6</a>         | 1.139 | 1.306 | 0.231518   | 0.502383  |
| 3150 | 10372421 | <a href="#">NM_146241</a>          | <a href="#">237553</a> | TRH-degrading enzyme           | <a href="#">Trhde</a>         | 1.139 | 3.678 | 0.00747264 | 0.0553226 |
| 3151 | 10409709 |                                    |                        |                                |                               | 1.139 | 2.23  | 0.0598787  | 0.225521  |
| 3152 | 10435415 | <a href="#">NM_013661</a>          | <a href="#">20357</a>  | sema domain, seven thrombospon | <a href="#">Sema5b</a>        | 1.139 | 3.359 | 0.0115793  | 0.0750561 |
| 3153 | 10485582 | <a href="#">NM_177190</a>          | <a href="#">320554</a> | t-complex 11 like 1            | <a href="#">Tcp111l</a>       | 1.139 | 1.963 | 0.0891667  | 0.287902  |
| 3154 | 10594103 | <a href="#">ENSMUST00000098674</a> | <a href="#">73673</a>  | RIKEN cDNA 2410076I21 gene     | <a href="#">2410076I21Rik</a> | 1.139 | 1.557 | 0.162061   | 0.410473  |
| 3155 | 10466573 | <a href="#">NM_017375</a>          | <a href="#">20409</a>  | osteoclast stimulating factor  | <a href="#">Ostf1</a>         | 1.139 | 1.675 | 0.1365     | 0.372937  |
| 3156 | 10355134 | <a href="#">ENSMUST00000027102</a> | <a href="#">74426</a>  | RIKEN cDNA 4933402D24 gene     | <a href="#">4933402D24Rik</a> | 1.139 | 2.053 | 0.0779877  | 0.265568  |
| 3157 | 10402383 | <a href="#">NM_026687</a>          | <a href="#">68348</a>  | serine (or cysteine) peptidase | <a href="#">Serpina1f</a>     | 1.139 | 2.477 | 0.0414406  | 0.177622  |
| 3158 | 10433578 | <a href="#">NM_009223</a>          | <a href="#">20621</a>  | stannin                        | <a href="#">Snn</a>           | 1.139 | 2.038 | 0.079781   | 0.269041  |
| 3159 | 10525833 | <a href="#">BC112905</a>           | <a href="#">21871</a>  | ATPase, H+ transporting, lysos | <a href="#">Atp6v0a2</a>      | 1.139 | 1.503 | 0.175272   | 0.428483  |
| 3160 | 10540168 | <a href="#">NM_172731</a>          | <a href="#">232237</a> | FYVE, RhoGEF and PH domain con | <a href="#">Fgd5</a>          | 1.139 | 2.803 | 0.0256288  | 0.129609  |
| 3161 | 10478560 | <a href="#">NM_133763</a>          | <a href="#">76233</a>  | deoxynucleotidyltransferase, t | <a href="#">Dnttip1</a>       | 1.139 | 1.924 | 0.0944747  | 0.298436  |
| 3162 | 10407042 | <a href="#">NM_025447</a>          | <a href="#">66254</a>  | DIM1 dimethyladenosine transfe | <a href="#">Dimt1</a>         | 1.139 | 1.017 | 0.341974   | 0.616342  |
| 3163 | 10603887 | <a href="#">NM_183185</a>          | <a href="#">245368</a> | zinc finger protein 300        | <a href="#">Zfp300</a>        | 1.139 | 2.063 | 0.0768861  | 0.262885  |
| 3164 | 10479490 | <a href="#">NM_145760</a>          | <a href="#">228998</a> | ADP-ribosylation factor GTPase | <a href="#">Arfgap1</a>       | 1.139 | 1.788 | 0.115729   | 0.338307  |
| 3165 | 10516520 | <a href="#">NM_001081098</a>       | <a href="#">230761</a> | zinc finger protein 362        | <a href="#">Zfp362</a>        | 1.139 | 2.223 | 0.0604605  | 0.226805  |
| 3166 | 10517587 | <a href="#">NM_007431</a>          | <a href="#">11647</a>  | alkaline phosphatase, liver/bo | <a href="#">Alpl</a>          | 1.139 | 1.68  | 0.135646   | 0.371434  |
| 3167 | 10545014 | <a href="#">BC024822</a>           | <a href="#">232023</a> | expressed sequence AW146242    | <a href="#">AW146242</a>      | 1.138 | 1.204 | 0.266562   | 0.541262  |
| 3168 | 10345224 |                                    |                        |                                |                               | 1.138 | 1.335 | 0.222356   | 0.492097  |
| 3169 | 10477815 | <a href="#">NM_172674</a>          | <a href="#">228829</a> | PHD finger protein 20          | <a href="#">Phf20</a>         | 1.138 | 1.49  | 0.178615   | 0.433598  |
| 3170 | 10444780 | <a href="#">NM_010380</a>          | <a href="#">14964</a>  | histocompatibility 2, D region | <a href="#">H2-D1</a>         | 1.138 | 1.066 | 0.320833   | 0.597681  |
| 3171 | 10521440 | <a href="#">NM_027373</a>          | <a href="#">70292</a>  | actin filament associated prot | <a href="#">Afap1</a>         | 1.138 | 2.022 | 0.0816919  | 0.272831  |

DNA segment Chr 6 Wayne

|      |          |                                    |                           |                                |                                    |       |       |            |           |
|------|----------|------------------------------------|---------------------------|--------------------------------|------------------------------------|-------|-------|------------|-----------|
| 3172 | 10541002 | <a href="#">BC056942</a>           | <a href="#">28006</a>     | DNA segment, Chr 6, Wayne Stat | <a href="#">D6Wsu116e</a>          | 1.138 | 2.771 | 0.0268266  | 0.1333    |
| 3173 | 10606989 | <a href="#">NM_001077364</a>       | <a href="#">14605</a>     | TSC22 domain family 3          | <a href="#">Tsc22d3</a>            | 1.138 | 1.917 | 0.0955956  | 0.300606  |
| 3174 | 10432799 | <a href="#">NM_019956</a>          | <a href="#">56735</a>     | keratin 71                     | <a href="#">Krt71</a>              | 1.138 | 2.958 | 0.0204521  | 0.111799  |
| 3175 | 10479074 | <a href="#">ENSMUST00000073081</a> | <a href="#">75485</a>     | RIKEN cDNA 1700010B08 gene     | <a href="#">1700010B08Rik</a>      | 1.138 | 1.498 | 0.176441   | 0.430345  |
| 3176 | 10345230 | <a href="#">NM_008999</a>          | <a href="#">19335</a>     | RAB23, member RAS oncogene fam | <a href="#">Rab23</a>              | 1.138 | 1.199 | 0.268412   | 0.542786  |
| 3177 | 10542006 | <a href="#">BC016429</a>           | <a href="#">28040</a>     | DNA segment, Chr 6, Wayne Stat | <a href="#">D6Wsu163e</a>          | 1.138 | 1.609 | 0.15029    | 0.393478  |
| 3178 | 10487879 | <a href="#">NM_178607</a>          | <a href="#">51902</a>     | ring finger protein 24         | <a href="#">Rnf24</a>              | 1.138 | 2.436 | 0.0440061  | 0.184853  |
| 3179 | 10558398 | <a href="#">AK019946</a>           | <a href="#">78548</a>     | RIKEN cDNA 5430417C01 gene     | <a href="#">5430417C01Rik</a>      | 1.138 | 1.297 | 0.234483   | 0.50565   |
| 3180 | 10368683 | <a href="#">NM_183254</a>          | <a href="#">66337</a>     | RIKEN cDNA 1700025K23 gene     | <a href="#">1700025K23Rik</a>      | 1.138 | 1.182 | 0.274835   | 0.549538  |
| 3181 | 10548051 | <a href="#">NM_013568</a>          | <a href="#">16494</a>     | potassium voltage-gated channe | <a href="#">Kcna6</a>              | 1.138 | 1.634 | 0.144945   | 0.386416  |
| 3182 | 10501860 | <a href="#">NM_001114665</a>       | <a href="#">214459</a>    | formin binding protein 1-like  | <a href="#">Fbnp1l</a>             | 1.138 | 2.586 | 0.0352212  | 0.159639  |
| 3183 | 10385941 | <a href="#">NM_021327</a>          | <a href="#">57783</a>     | TNFAIP3 interacting protein 1  | <a href="#">Tnip1</a>              | 1.138 | 3.233 | 0.0138089  | 0.0851239 |
| 3184 | 10350502 |                                    |                           |                                |                                    | 1.138 | 2.532 | 0.0381921  | 0.168893  |
| 3185 | 10485191 | <a href="#">ENSMUST00000111274</a> | <a href="#">100042784</a> | PR domain containing 11        | <a href="#">Prdm11</a>             | 1.138 | 2.634 | 0.0328215  | 0.152417  |
| 3186 | 10431137 |                                    |                           |                                |                                    | 1.138 | 2.083 | 0.0745774  | 0.258248  |
| 3187 | 10445046 | <a href="#">NM_011280</a>          | <a href="#">19824</a>     | tripartite motif-containing 10 | <a href="#">Trim10</a>             | 1.137 | 0.552 | 0.59756    | 0.81066   |
| 3188 | 10362446 |                                    |                           |                                |                                    | 1.137 | 3.851 | 0.00593303 | 0.046687  |
| 3189 | 10451213 | <a href="#">BC019423</a>           | <a href="#">75564</a>     | RIKEN cDNA 1700027N10 gene     | <a href="#">1700027N10Rik</a>      | 1.137 | 0.965 | 0.365859   | 0.636894  |
| 3190 | 10512680 | <a href="#">ENSMUST00000086248</a> | <a href="#">20871</a>     | aurora kinase C                | <a href="#">Aurkc</a>              | 1.137 | 1.647 | 0.142347   | 0.382389  |
| 3191 | 10465226 | <a href="#">NM_023912</a>          | <a href="#">78891</a>     | SCY1-like 1 (S. cerevisiae)    | <a href="#">Scy1l</a>              | 1.137 | 2.425 | 0.0447803  | 0.187184  |
| 3192 | 10508709 |                                    |                           |                                |                                    | 1.137 | 1.971 | 0.0881195  | 0.286074  |
| 3193 | 10442194 | <a href="#">NM_172486</a>          | <a href="#">210503</a>    | zinc finger protein 677        | <a href="#">Zfp677</a>             | 1.137 | 0.538 | 0.606848   | 0.817013  |
| 3194 | 10528790 | <a href="#">NM_020570</a>          | <a href="#">57434</a>     | X-ray repair complementing def | <a href="#">Xrcc2</a>              | 1.137 | 0.952 | 0.372016   | 0.642325  |
| 3195 | 10410341 | <a href="#">NM_133228</a>          | <a href="#">170763</a>    | zinc finger protein 87         | <a href="#">Zfp87</a>              | 1.137 | 1.335 | 0.222627   | 0.492542  |
| 3196 | 10457663 |                                    |                           |                                |                                    | 1.137 | 1.944 | 0.0917656  | 0.293524  |
| 3197 | 10344658 | <a href="#">NM_009826</a>          | <a href="#">12421</a>     | RB1-inducible coiled-coil 1    | <a href="#">Rblcc1</a>             | 1.137 | 1.259 | 0.247298   | 0.520648  |
| 3198 | 10412394 | <a href="#">NR_003544</a>          | <a href="#">18115</a>     | nicotinamide nucleotide transh | <a href="#">Nnt</a>                | 1.137 | 2.116 | 0.07102    | 0.250191  |
| 3199 | 10409259 |                                    |                           |                                |                                    | 1.137 | 0.738 | 0.48369    | 0.732303  |
| 3200 | 10606441 |                                    |                           |                                |                                    | 1.137 | 2.735 | 0.0282803  | 0.137931  |
| 3201 | 10447891 | <a href="#">NM_009338</a>          | <a href="#">110460</a>    | acetyl-Coenzyme A acetyltransf | <a href="#">Acat2</a>              | 1.137 | 1.656 | 0.140404   | 0.378951  |
| 3202 | 10474269 | <a href="#">ENSMUST00000079069</a> | <a href="#">622282</a>    | predicted gene, EG622282       | <a href="#">EG622282</a>           | 1.137 | 1.772 | 0.118366   | 0.343378  |
| 3203 | 10510254 | <a href="#">NM_010244</a>          | <a href="#">14349</a>     | Friend virus susceptibility 1  | <a href="#">Fv1</a>                | 1.137 | 0.534 | 0.609598   | 0.818311  |
| 3204 | 10382136 | <a href="#">BC124997</a>           | <a href="#">69066</a>     | RIKEN cDNA 1810010H24 gene     | <a href="#">1810010H24Rik</a>      | 1.137 | 1.457 | 0.187347   | 0.445668  |
| 3205 | 10372781 | <a href="#">NM_028679</a>          | <a href="#">73914</a>     | interleukin-1 receptor-associa | <a href="#">Irak3</a>              | 1.137 | 1.851 | 0.105423   | 0.319992  |
| 3206 | 10408173 |                                    |                           |                                |                                    | 1.137 | 2.448 | 0.0432664  | 0.182768  |
| 3207 | 10376988 | <a href="#">NM_026107</a>          | <a href="#">52712</a>     | zinc finger with KRAB and SCAN | <a href="#">Zkscan6</a>            | 1.137 | 0.819 | 0.439161   | 0.69843   |
| 3208 | 10565840 | <a href="#">NM_016720</a>          | <a href="#">50877</a>     | neuraminidase 3                | <a href="#">Neu3</a>               | 1.136 | 1.413 | 0.199207   | 0.460684  |
| 3209 | 10500748 | <a href="#">NM_009432</a>          | <a href="#">22094</a>     | thyroid stimulating hormone, b | <a href="#">Tshb</a>               | 1.136 | 1.073 | 0.317955   | 0.595147  |
| 3210 | 10545771 | <a href="#">NM_175475</a>          | <a href="#">232174</a>    | cytochrome P450, family 26, su | <a href="#">Cyp26b1</a>            | 1.136 | 1.84  | 0.10703    | 0.322599  |
| 3211 | 10552475 | <a href="#">ENSMUST00000107970</a> | <a href="#">69511</a>     | kallikrein related-peptidase 1 | <a href="#">Klk12</a>              | 1.136 | 1.747 | 0.122902   | 0.350775  |
| 3212 | 10399034 |                                    |                           |                                |                                    | 1.136 | 2.657 | 0.0317367  | 0.149088  |
| 3213 | 10458088 | <a href="#">ENSMUST00000097631</a> | <a href="#">633395</a>    | predicted gene, ENSMUSG0000007 | <a href="#">ENSMUSG00000073607</a> | 1.136 | 0.905 | 0.394732   | 0.662293  |
| 3214 | 10433096 | <a href="#">NM_008685</a>          | <a href="#">18022</a>     | nuclear factor, erythroid deri | <a href="#">Nfe2</a>               | 1.136 | 0.832 | 0.431933   | 0.692351  |
| 3215 | 10407946 | <a href="#">NM_024270</a>          | <a href="#">76205</a>     | STARD3 N-terminal like         | <a href="#">Stard3nl</a>           | 1.136 | 0.875 | 0.409975   | 0.674344  |
| 3216 | 10543004 | <a href="#">NM_183308</a>          | <a href="#">330260</a>    | paraoxonase 2                  | <a href="#">Pon2</a>               | 1.136 | 1.906 | 0.0971188  | 0.3035    |
| 3217 | 10578207 | <a href="#">NM_001081150</a>       | <a href="#">244421</a>    | LON peptidase N-terminal domai | <a href="#">Lonrf1</a>             | 1.136 | 1.092 | 0.31002    | 0.586741  |
| 3218 | 10593878 | <a href="#">NM_175483</a>          | <a href="#">235406</a>    | sorting nexin 33               | <a href="#">Snx33</a>              | 1.136 | 1.213 | 0.263529   | 0.53828   |
| 3219 | 10588942 | <a href="#">NM_008483</a>          | <a href="#">16779</a>     | laminin, beta 2                | <a href="#">Lamb2</a>              | 1.136 | 1.567 | 0.159813   | 0.407118  |
| 3220 | 10516529 | <a href="#">NM_172875</a>          | <a href="#">242669</a>    | arginine decarboxylase         | <a href="#">Adc</a>                | 1.136 | 1.845 | 0.106327   | 0.321598  |

|      |          |                                    |                           |                                |                                    |       |       |           |           |
|------|----------|------------------------------------|---------------------------|--------------------------------|------------------------------------|-------|-------|-----------|-----------|
| 3221 | 10569656 | <a href="#">NM_146206</a>          | <a href="#">233979</a>    | two pore segment channel 2     | <a href="#">Tpcn2</a>              | 1.136 | 1.889 | 0.0995326 | 0.308219  |
| 3222 | 10372139 | <a href="#">NM_024435</a>          | <a href="#">67405</a>     | neurotensin                    | <a href="#">Nts</a>                | 1.136 | 0.351 | 0.735916  | 0.886874  |
| 3223 | 10489440 | <a href="#">NM_183271</a>          | <a href="#">68221</a>     | WAP four-disulfide core domain | <a href="#">Wfdc15a</a>            | 1.136 | 1.991 | 0.0855428 | 0.280682  |
| 3224 | 10584494 | <a href="#">NM_146505</a>          | <a href="#">258498</a>    | olfactory receptor 148         | <a href="#">Olfr148</a>            | 1.136 | 2.152 | 0.0672942 | 0.242397  |
| 3225 | 10582925 | <a href="#">NM_026303</a>          | <a href="#">67667</a>     | alkB, alkylation repair homolo | <a href="#">Alkbh8</a>             | 1.136 | 1.481 | 0.180875  | 0.436777  |
| 3226 | 10431974 | <a href="#">NM_144850</a>          | <a href="#">223864</a>    | Rap guanine nucleotide exchang | <a href="#">Rapgef3</a>            | 1.135 | 2.483 | 0.0410551 | 0.176652  |
| 3227 | 10452918 | <a href="#">NM_011500</a>          | <a href="#">268980</a>    | striatin, calmodulin binding p | <a href="#">Strn</a>               | 1.135 | 1.764 | 0.119772  | 0.346027  |
| 3228 | 10373530 | <a href="#">NM_183417</a>          | <a href="#">12566</a>     | cyclin-dependent kinase 2      | <a href="#">Cdk2</a>               | 1.135 | 1.952 | 0.0906269 | 0.290953  |
| 3229 | 10444016 | <a href="#">NM_001002842</a>       | <a href="#">378460</a>    | PML-RAR alpha-regulated adapto | <a href="#">Pram1</a>              | 1.135 | 2.453 | 0.0429374 | 0.181833  |
| 3230 | 10596442 | <a href="#">NM_198931</a>          | <a href="#">67905</a>     | protein phosphatase 1M         | <a href="#">Ppm1m</a>              | 1.135 | 1.673 | 0.137067  | 0.373617  |
| 3231 | 10493496 | <a href="#">AK132440</a>           | <a href="#">100048897</a> | predicted gene, ENSMUSG0000007 | <a href="#">ENSMUSG00000074468</a> | 1.135 | 1.79  | 0.115319  | 0.337519  |
| 3232 | 10364728 | <a href="#">NM_023431</a>          | <a href="#">68114</a>     | melanoma associated antigen (m | <a href="#">Mum1</a>               | 1.135 | 1.839 | 0.10729   | 0.322741  |
| 3233 | 10491621 | <a href="#">ENSMUST00000057272</a> | <a href="#">229227</a>    | RIKEN cDNA 4932438A13 gene     | <a href="#">4932438A13Rik</a>      | 1.135 | 2.078 | 0.0751658 | 0.259229  |
| 3234 | 10491526 | <a href="#">NM_172678</a>          | <a href="#">229211</a>    | acyl-Coenzyme A dehydrogenase  | <a href="#">Acad9</a>              | 1.135 | 1.912 | 0.0963047 | 0.302072  |
| 3235 | 10393877 | <a href="#">AK047224</a>           | <a href="#">17134</a>     | v-maf musculoaponeurotic fibro | <a href="#">Mafg</a>               | 1.135 | 0.571 | 0.585272  | 0.802789  |
| 3236 | 10374746 | <a href="#">NM_025923</a>          | <a href="#">67030</a>     | Fanconi anemia, complementatio | <a href="#">Fanc1</a>              | 1.135 | 2.518 | 0.0389713 | 0.171027  |
| 3237 | 10450529 | <a href="#">NM_001033366</a>       | <a href="#">268949</a>    | diffuse panbronchiolitis criti | <a href="#">Dper1</a>              | 1.135 | 1.622 | 0.147497  | 0.389587  |
| 3238 | 10516576 | <a href="#">NM_009030</a>          | <a href="#">19646</a>     | retinoblastoma binding protein | <a href="#">Rbbp4</a>              | 1.135 | 2.4   | 0.0464658 | 0.191627  |
| 3239 | 10366767 | <a href="#">NM_146012</a>          | <a href="#">52468</a>     | CTD (carboxy-terminal domain,  | <a href="#">Ctdsp2</a>             | 1.135 | 1.944 | 0.0917231 | 0.293492  |
| 3240 | 10468988 |                                    |                           |                                |                                    | 1.135 | 2.107 | 0.071975  | 0.252294  |
| 3241 | 10407568 |                                    |                           |                                |                                    | 1.135 | 2.499 | 0.040072  | 0.17423   |
| 3242 | 10515939 | <a href="#">NM_194060</a>          | <a href="#">329934</a>    | forkhead box O6                | <a href="#">Foxo6</a>              | 1.135 | 1.262 | 0.246107  | 0.51906   |
| 3243 | 10451434 | <a href="#">NM_009358</a>          | <a href="#">21770</a>     | protein phosphatase 2, regulat | <a href="#">Ppp2r5d</a>            | 1.135 | 1.536 | 0.167179  | 0.418175  |
| 3244 | 10568188 | <a href="#">NM_144522</a>          | <a href="#">68449</a>     | TBC1 domain family, member 10b | <a href="#">Tbc1d10b</a>           | 1.135 | 1.801 | 0.113503  | 0.333876  |
| 3245 | 10406941 | <a href="#">NM_144838</a>          | <a href="#">218544</a>    | small glutamine-rich tetratric | <a href="#">Sgtb</a>               | 1.135 | 0.881 | 0.406857  | 0.671343  |
| 3246 | 10607244 | <a href="#">BC083100</a>           | <a href="#">546387</a>    | predicted gene, EG546387       | <a href="#">EG546387</a>           | 1.135 | 3.37  | 0.0114042 | 0.0742122 |
| 3247 | 10380634 | <a href="#">NM_010460</a>          | <a href="#">15415</a>     | homeo box B7                   | <a href="#">Hoxb7</a>              | 1.135 | 1.56  | 0.161448  | 0.409623  |
| 3248 | 10386205 | <a href="#">NM_146376</a>          | <a href="#">258373</a>    | olfactory receptor 323         | <a href="#">Olfr323</a>            | 1.135 | 1.913 | 0.0960612 | 0.301621  |
| 3249 | 10499160 | <a href="#">NM_007639</a>          | <a href="#">12479</a>     | CD1d1 antigen                  | <a href="#">Cd1d1</a>              | 1.134 | 0.785 | 0.457632  | 0.713266  |
| 3250 | 10518218 | <a href="#">XR_032523</a>          | <a href="#">666194</a>    | similar to Integrator complex  | <a href="#">LOC666194</a>          | 1.134 | 1.726 | 0.126781  | 0.356707  |
| 3251 | 10458661 |                                    |                           |                                |                                    | 1.134 | 2.62  | 0.0335223 | 0.154383  |
| 3252 | 10542662 | <a href="#">NM_177314</a>          | <a href="#">321015</a>    | RIKEN cDNA 5330439B14 gene     | <a href="#">5330439B14Rik</a>      | 1.134 | 1.493 | 0.177841  | 0.432364  |
| 3253 | 10386909 | <a href="#">BC038868</a>           | <a href="#">73139</a>     | proline-rich polypeptide 6     | <a href="#">Prr6</a>               | 1.134 | 1.101 | 0.306313  | 0.582854  |
| 3254 | 10383731 | <a href="#">NM_013870</a>          | <a href="#">29856</a>     | smoothelin                     | <a href="#">Smtn</a>               | 1.134 | 1.685 | 0.134593  | 0.369832  |
| 3255 | 10598833 | <a href="#">NM_021715</a>          | <a href="#">60322</a>     | carbohydrate (N-acetylglucosam | <a href="#">Chst7</a>              | 1.134 | 1.601 | 0.152219  | 0.39598   |
| 3256 | 10416734 |                                    |                           |                                |                                    | 1.134 | 2.623 | 0.033384  | 0.154129  |
| 3257 | 10359339 | <a href="#">NM_013862</a>          | <a href="#">29809</a>     | RAB GTPase activating protein  | <a href="#">Rabgap11</a>           | 1.134 | 1.605 | 0.151342  | 0.395197  |
| 3258 | 10474915 | <a href="#">NM_177157</a>          | <a href="#">320415</a>    | GTP cyclohydrolase I feedback  | <a href="#">Gchfr</a>              | 1.134 | 1.717 | 0.128336  | 0.359238  |
| 3259 | 10451646 | <a href="#">NM_178796</a>          | <a href="#">328830</a>    | RIKEN cDNA A530064D06 gene     | <a href="#">A530064D06Rik</a>      | 1.134 | 1.262 | 0.246357  | 0.519442  |
| 3260 | 10437945 | <a href="#">NM_008565</a>          | <a href="#">17217</a>     | minichromosome maintenance def | <a href="#">Mcm4</a>               | 1.134 | 1.595 | 0.153416  | 0.397723  |
| 3261 | 10401317 | <a href="#">NM_001038995</a>       | <a href="#">214321</a>    | predicted gene, EG214321       | <a href="#">EG214321</a>           | 1.134 | 0.543 | 0.603657  | 0.814811  |
| 3262 | 10466622 | <a href="#">AK149560</a>           | <a href="#">100038579</a> | predicted gene, ENSMUSG0000007 | <a href="#">ENSMUSG00000074936</a> | 1.134 | 0.54  | 0.605148  | 0.815765  |
| 3263 | 10349316 | <a href="#">NM_146103</a>          | <a href="#">226351</a>    | transmembrane protein 185B     | <a href="#">Tmem185b</a>           | 1.134 | 2.531 | 0.0382437 | 0.168959  |
| 3264 | 10604187 | <a href="#">NM_001017959</a>       | <a href="#">16784</a>     | lysosomal-associated membrane  | <a href="#">Lamp2</a>              | 1.134 | 1.186 | 0.273159  | 0.547717  |
| 3265 | 10479950 | <a href="#">NM_001110231</a>       | <a href="#">14007</a>     | CUG triplet repeat, RNA bindin | <a href="#">Cugbp2</a>             | 1.134 | 0.917 | 0.388689  | 0.657212  |
| 3266 | 10436623 | <a href="#">NM_139134</a>          | <a href="#">246048</a>    | chondrolectin                  | <a href="#">Chodl</a>              | 1.134 | 0.628 | 0.5492    | 0.779541  |
| 3267 | 10552945 | <a href="#">NM_030678</a>          | <a href="#">14936</a>     | glycogen synthase 1, muscle    | <a href="#">Gys1</a>               | 1.134 | 1.47  | 0.183783  | 0.440979  |
| 3268 | 10401607 | <a href="#">NM_008827</a>          | <a href="#">18654</a>     | placental growth factor        | <a href="#">Pgf</a>                | 1.134 | 1.158 | 0.283705  | 0.559004  |
| 3269 | 10546010 | <a href="#">NM_001037727</a>       | <a href="#">232201</a>    | Rho GTPase activating protein  | <a href="#">Arhgap25</a>           | 1.134 | 2.042 | 0.0792558 | 0.26804   |

|      |          |                                    |                           |                                 |                                     |       |       |           |          |
|------|----------|------------------------------------|---------------------------|---------------------------------|-------------------------------------|-------|-------|-----------|----------|
| 3270 | 10454478 | <a href="#">NM_027002</a>          | <a href="#">69241</a>     | polymerase (RNA) II (DNA direc  | <a href="#">Polr2d</a>              | 1.134 | 0.893 | 0.40051   | 0.666382 |
| 3271 | 10408450 | <a href="#">NM_009238</a>          | <a href="#">20677</a>     | SRY-box containing gene 4       | <a href="#">Sox4</a>                | 1.134 | 1.392 | 0.205402  | 0.469103 |
| 3272 | 10556005 | <a href="#">NM_010562</a>          | <a href="#">16202</a>     | integrin linked kinase          | <a href="#">Ilk</a>                 | 1.134 | 1.4   | 0.203075  | 0.465808 |
| 3273 | 10586759 | <a href="#">NM_016787</a>          | <a href="#">12175</a>     | BCL2/adenovirus E1B interactin  | <a href="#">Bnip2</a>               | 1.134 | 2.319 | 0.0524118 | 0.207062 |
| 3274 | 10408647 | <a href="#">BC014724</a>           | <a href="#">69123</a>     | RIKEN cDNA 1810022C23 gene      | <a href="#">1810022C23Rik</a>       | 1.134 | 2.156 | 0.0668579 | 0.241483 |
| 3275 | 10587810 | <a href="#">NM_001033184</a>       | <a href="#">78459</a>     | RIKEN cDNA 1700057G04 gene      | <a href="#">1700057G04Rik</a>       | 1.133 | 2.976 | 0.0199226 | 0.109657 |
| 3276 | 10422585 | <a href="#">NM_207667</a>          | <a href="#">14169</a>     | fibroblast growth factor 14     | <a href="#">Fgf14</a>               | 1.133 | 1.598 | 0.152845  | 0.396925 |
| 3277 | 10422699 |                                    |                           |                                 |                                     | 1.133 | 1.594 | 0.153714  | 0.398251 |
| 3278 | 10356379 | <a href="#">NM_021306</a>          | <a href="#">13599</a>     | endothelin converting enzyme-1  | <a href="#">Ecel1</a>               | 1.133 | 2.343 | 0.0506037 | 0.202683 |
| 3279 | 10415960 | <a href="#">NM_153414</a>          | <a href="#">210925</a>    | integrator complex subunit 9    | <a href="#">Ints9</a>               | 1.133 | 1.595 | 0.153582  | 0.398104 |
| 3280 | 10571371 | <a href="#">NM_030254</a>          | <a href="#">80286</a>     | tumor suppressor candidate 3    | <a href="#">Tusc3</a>               | 1.133 | 2.228 | 0.0600774 | 0.22593  |
| 3281 | 10414981 | <a href="#">ENSMUST00000103674</a> | <a href="#">547428</a>    | predicted gene, OTTMUSG0000001  | <a href="#">OTTMUSG00000015025</a>  | 1.133 | 2.023 | 0.0815798 | 0.272821 |
| 3282 | 10510687 | <a href="#">NM_133348</a>          | <a href="#">70025</a>     | acyl-CoA thioesterase 7         | <a href="#">Acot7</a>               | 1.133 | 2.272 | 0.0562378 | 0.21679  |
| 3283 | 10410656 | <a href="#">NM_009817</a>          | <a href="#">12380</a>     | calpastatin                     | <a href="#">Cast</a>                | 1.133 | 1.69  | 0.133531  | 0.367916 |
| 3284 | 10562331 | <a href="#">NM_016682</a>          | <a href="#">50995</a>     | ubiquitin-like modifier activa  | <a href="#">Uba2</a>                | 1.133 | 2.126 | 0.0699831 | 0.24786  |
| 3285 | 10401702 | <a href="#">NM_001080943</a>       | <a href="#">238331</a>    | zinc finger, DHHC-type contain  | <a href="#">Zdhhc22</a>             | 1.133 | 1.557 | 0.16212   | 0.410473 |
| 3286 | 10375358 | <a href="#">ENSMUST00000109268</a> | <a href="#">13591</a>     | early B-cell factor 1           | <a href="#">Ebf1</a>                | 1.133 | 1.416 | 0.198514  | 0.459534 |
| 3287 | 10350758 | <a href="#">AK080751</a>           | <a href="#">791276</a>    | predicted gene, ENSMUSG00000006 | <a href="#">ENSMUSG000000066798</a> | 1.133 | 1.153 | 0.285661  | 0.561079 |
| 3288 | 10460833 | <a href="#">NM_010119</a>          | <a href="#">13660</a>     | EH-domain containing 1          | <a href="#">Ehd1</a>                | 1.133 | 2.385 | 0.0475096 | 0.194077 |
| 3289 | 10591412 | <a href="#">NM_010333</a>          | <a href="#">14739</a>     | endothelial differentiation, s  | <a href="#">Edg5</a>                | 1.133 | 1.602 | 0.151933  | 0.395759 |
| 3290 | 10537787 | <a href="#">NM_199159</a>          | <a href="#">387512</a>    | taste receptor, type 2, member  | <a href="#">Tas2r135</a>            | 1.133 | 1.646 | 0.142431  | 0.382469 |
| 3291 | 10409065 | <a href="#">NM_207232</a>          | <a href="#">218232</a>    | protein tyrosine phosphatase d  | <a href="#">Ptpdc1</a>              | 1.133 | 1.144 | 0.289114  | 0.565029 |
| 3292 | 10602599 | <a href="#">NM_019710</a>          | <a href="#">24061</a>     | structural maintenance of chro  | <a href="#">Smc1a</a>               | 1.133 | 2.204 | 0.0622312 | 0.230724 |
| 3293 | 10505451 | <a href="#">NM_011016</a>          | <a href="#">18406</a>     | orosomuroid 2                   | <a href="#">Orm2</a>                | 1.133 | 1.704 | 0.130814  | 0.362937 |
| 3294 | 10607202 |                                    |                           |                                 |                                     | 1.133 | 0.991 | 0.353814  | 0.6265   |
| 3295 | 10356997 |                                    |                           |                                 |                                     | 1.133 | 2.819 | 0.025017  | 0.127548 |
| 3296 | 10475718 | <a href="#">NM_177214</a>          | <a href="#">320632</a>    | activating signal cointegrator  | <a href="#">Ascc3l1</a>             | 1.133 | 1.753 | 0.121717  | 0.348347 |
| 3297 | 10493668 | <a href="#">ENSMUST00000029548</a> | <a href="#">77595</a>     | nucleoporin 210-like            | <a href="#">Nup210l</a>             | 1.133 | 2.106 | 0.0721028 | 0.252659 |
| 3298 | 10394429 | <a href="#">BC046986</a>           | <a href="#">68832</a>     | RIKEN cDNA 1110057K04 gene      | <a href="#">1110057K04Rik</a>       | 1.133 | 2.034 | 0.0802995 | 0.270212 |
| 3299 | 10538979 | <a href="#">NM_009858</a>          | <a href="#">12526</a>     | CD8 antigen, beta chain 1       | <a href="#">Cd8b1</a>               | 1.133 | 1.622 | 0.147513  | 0.389587 |
| 3300 | 10518841 | <a href="#">NM_175152</a>          | <a href="#">69876</a>     | THAP domain containing, apopto  | <a href="#">Thap3</a>               | 1.132 | 2.227 | 0.0601047 | 0.225949 |
| 3301 | 10436203 | <a href="#">XM_001480094</a>       | <a href="#">100043404</a> | similar to ribosomal protein    | <a href="#">LOC100043404</a>        | 1.132 | 2.538 | 0.0378254 | 0.16795  |
| 3302 | 10579508 | <a href="#">ENSMUST00000093450</a> | <a href="#">382014</a>    | transmembrane protein 16H       | <a href="#">Tmem16h</a>             | 1.132 | 2.037 | 0.0798916 | 0.269372 |
| 3303 | 10510019 | <a href="#">AK046532</a>           | <a href="#">320456</a>    | RIKEN cDNA B330016D10 gene      | <a href="#">B330016D10Rik</a>       | 1.132 | 0.744 | 0.480587  | 0.730205 |
| 3304 | 10543846 | <a href="#">NM_021435</a>          | <a href="#">58246</a>     | solute carrier family 35, memb  | <a href="#">Slc35b4</a>             | 1.132 | 1.853 | 0.105095  | 0.319364 |
| 3305 | 10543591 | <a href="#">NM_007538</a>          | <a href="#">12057</a>     | opsin 1 (cone pigments), short  | <a href="#">Opn1sw</a>              | 1.132 | 1.453 | 0.188328  | 0.446362 |
| 3306 | 10477107 | <a href="#">NM_177656</a>          | <a href="#">228778</a>    | RIKEN cDNA 6820408C15 gene      | <a href="#">6820408C15Rik</a>       | 1.132 | 1.782 | 0.116761  | 0.340277 |
| 3307 | 10576840 | <a href="#">AK019856</a>           | <a href="#">78899</a>     | RIKEN cDNA 4932443L11 gene      | <a href="#">4932443L11Rik</a>       | 1.132 | 1.189 | 0.271941  | 0.546343 |
| 3308 | 10401320 | <a href="#">NM_009620</a>          | <a href="#">11498</a>     | a disintegrin and metallopepti  | <a href="#">Adam4</a>               | 1.132 | 1.112 | 0.301781  | 0.577905 |
| 3309 | 10542691 | <a href="#">NM_008511</a>          | <a href="#">16970</a>     | lymphoid-restricted membrane p  | <a href="#">Lrmp</a>                | 1.132 | 2.794 | 0.02596   | 0.130535 |
| 3310 | 10594110 | <a href="#">NM_008684</a>          | <a href="#">18007</a>     | neogenin                        | <a href="#">Neo1</a>                | 1.132 | 1.318 | 0.227947  | 0.49895  |
| 3311 | 10510305 | <a href="#">NM_020009</a>          | <a href="#">56717</a>     | FK506 binding protein 12-rapam  | <a href="#">Frap1</a>               | 1.132 | 1.89  | 0.0993862 | 0.308036 |
| 3312 | 10367770 | <a href="#">ENSMUST00000066742</a> | <a href="#">791352</a>    | predicted gene, ENSMUSG00000005 | <a href="#">ENSMUSG000000053980</a> | 1.132 | 1.198 | 0.268957  | 0.543518 |
| 3313 | 10385239 | <a href="#">NM_134017</a>          | <a href="#">108645</a>    | methionine adenosyltransferase  | <a href="#">Mat2b</a>               | 1.132 | 1.223 | 0.259615  | 0.533979 |
| 3314 | 10424662 | <a href="#">NM_028216</a>          | <a href="#">72373</a>     | prostate stem cell antigen      | <a href="#">Pscs</a>                | 1.132 | 1.705 | 0.130632  | 0.362763 |
| 3315 | 10490872 | <a href="#">NM_028915</a>          | <a href="#">71710</a>     | leucine rich repeat and coiled  | <a href="#">Lrrcc1</a>              | 1.132 | 0.887 | 0.403554  | 0.668494 |
| 3316 | 10446777 | <a href="#">NM_020578</a>          | <a href="#">57440</a>     | EH-domain containing 3          | <a href="#">Ehd3</a>                | 1.132 | 1.441 | 0.191529  | 0.450866 |
| 3317 | 10484425 | <a href="#">NM_001033166</a>       | <a href="#">72657</a>     | RIKEN cDNA 2700094K13 gene      | <a href="#">2700094K13Rik</a>       | 1.132 | 1.47  | 0.183738  | 0.440966 |
| 3318 | 10430302 | <a href="#">NM_007781</a>          | <a href="#">12984</a>     | colony stimulating factor 2 re  | <a href="#">Csf2rb2</a>             | 1.131 | 1.562 | 0.160978  | 0.408854 |

|      |          |                                    |                        |                                |                                    |       |       |           |          |
|------|----------|------------------------------------|------------------------|--------------------------------|------------------------------------|-------|-------|-----------|----------|
| 3319 | 10354258 | <a href="#">NM_026430</a>          | <a href="#">67883</a>  | UDP-glucuronate decarboxylase  | <a href="#">Uxs1</a>               | 1.131 | 2.073 | 0.0757311 | 0.260282 |
| 3320 | 10540472 | <a href="#">NM_011498</a>          | <a href="#">20893</a>  | basic helix-loop-helix domain  | <a href="#">Bhlhb2</a>             | 1.131 | 1.509 | 0.173674  | 0.426449 |
| 3321 | 10406193 | <a href="#">NM_024201</a>          | <a href="#">67433</a>  | coiled-coil domain containing  | <a href="#">Ccdc127</a>            | 1.131 | 1.401 | 0.202801  | 0.465349 |
| 3322 | 10414417 | <a href="#">NM_033602</a>          | <a href="#">93834</a>  | pellino 2                      | <a href="#">Peli2</a>              | 1.131 | 1.728 | 0.126355  | 0.356023 |
| 3323 | 10530360 | <a href="#">NM_175519</a>          | <a href="#">243043</a> | potassium channel tetramerisat | <a href="#">Kctd8</a>              | 1.131 | 1.671 | 0.137314  | 0.374193 |
| 3324 | 10436849 | <a href="#">NM_010508</a>          | <a href="#">15975</a>  | interferon (alpha and beta) re | <a href="#">Ifnar1</a>             | 1.131 | 2.397 | 0.046686  | 0.191982 |
| 3325 | 10455088 | <a href="#">NM_053136</a>          | <a href="#">93882</a>  | protocadherin beta 11          | <a href="#">Pcdhb11</a>            | 1.131 | 1.246 | 0.251602  | 0.525573 |
| 3326 | 10551080 | <a href="#">NM_027882</a>          | <a href="#">71722</a>  | capicua homolog (Drosophila)   | <a href="#">Cic</a>                | 1.131 | 2.113 | 0.0713406 | 0.250903 |
| 3327 | 10582229 | <a href="#">ENSMUST00000059018</a> | <a href="#">76291</a>  | RIKEN cDNA 1110003O08 gene     | <a href="#">1110003O08Rik</a>      | 1.131 | 2.172 | 0.0652787 | 0.238303 |
| 3328 | 10514520 | <a href="#">NM_028979</a>          | <a href="#">74519</a>  | cytochrome P450, family 2, sub | <a href="#">Cyp2j9</a>             | 1.131 | 1.07  | 0.31899   | 0.596119 |
| 3329 | 10588669 | <a href="#">NM_019713</a>          | <a href="#">56289</a>  | Ras association (RalGDS/AF-6)  | <a href="#">Rassf1</a>             | 1.131 | 1.637 | 0.144387  | 0.385687 |
| 3330 | 10596543 | <a href="#">NM_030730</a>          | <a href="#">81000</a>  | Rad54 like 2 (S. cerevisiae)   | <a href="#">Rad54l2</a>            | 1.131 | 0.506 | 0.627776  | 0.830715 |
| 3331 | 10448247 | <a href="#">NM_009555</a>          | <a href="#">22700</a>  | zinc finger protein 40         | <a href="#">Zfp40</a>              | 1.131 | 0.784 | 0.458091  | 0.71335  |
| 3332 | 10377215 | <a href="#">NM_008088</a>          | <a href="#">14457</a>  | growth arrest specific 7       | <a href="#">Gas7</a>               | 1.131 | 2.461 | 0.0424301 | 0.180475 |
| 3333 | 10455656 | <a href="#">NM_008292</a>          | <a href="#">15488</a>  | hydroxysteroid (17-beta) dehyd | <a href="#">Hsd17b4</a>            | 1.131 | 1.764 | 0.119826  | 0.346027 |
| 3334 | 10551393 | <a href="#">NM_007434</a>          | <a href="#">11652</a>  | thymoma viral proto-oncogene 2 | <a href="#">Akt2</a>               | 1.131 | 1.348 | 0.218558  | 0.486749 |
| 3335 | 10485836 | <a href="#">NM_205783</a>          | <a href="#">213788</a> | cholinergic receptor, muscarin | <a href="#">Chrm5</a>              | 1.131 | 1.202 | 0.267197  | 0.541834 |
| 3336 | 10390153 | <a href="#">NM_177619</a>          | <a href="#">217127</a> | MYST histone acetyltransferase | <a href="#">Myst2</a>              | 1.131 | 1.055 | 0.325304  | 0.601664 |
| 3337 | 10508772 | <a href="#">NM_010208</a>          | <a href="#">14191</a>  | Gardner-Rasheed feline sarcoma | <a href="#">Fgr</a>                | 1.131 | 1.83  | 0.108706  | 0.325457 |
| 3338 | 10481186 | <a href="#">NM_138665</a>          | <a href="#">192166</a> | sarcosine dehydrogenase        | <a href="#">Sardh</a>              | 1.131 | 1.625 | 0.146863  | 0.388752 |
| 3339 | 10390252 | <a href="#">ENSMUST00000100525</a> | <a href="#">544810</a> | predicted gene, OTTMUSG0000000 | <a href="#">OTTMUSG00000001969</a> | 1.131 | 1.457 | 0.18736   | 0.445668 |
| 3340 | 10530627 | <a href="#">BC031901</a>           | <a href="#">231296</a> | cDNA sequence BC031901         | <a href="#">BC031901</a>           | 1.13  | 2.064 | 0.076712  | 0.262629 |
| 3341 | 10528521 |                                    |                        |                                |                                    | 1.13  | 0.817 | 0.440214  | 0.699184 |
| 3342 | 10362487 | <a href="#">NM_009433</a>          | <a href="#">22110</a>  | testis-specific protein, Y-enc | <a href="#">Tspy11</a>             | 1.13  | 1.307 | 0.231244  | 0.501993 |
| 3343 | 10465673 | <a href="#">BC125249</a>           | <a href="#">68229</a>  | expressed sequence AI846148    | <a href="#">AI846148</a>           | 1.13  | 2.308 | 0.053319  | 0.209428 |
| 3344 | 10391837 | <a href="#">NM_152813</a>          | <a href="#">72469</a>  | phospholipase C, delta 3       | <a href="#">Plec3</a>              | 1.13  | 2.339 | 0.0508604 | 0.203346 |
| 3345 | 10551815 | <a href="#">NM_011981</a>          | <a href="#">26466</a>  | zinc finger protein 260        | <a href="#">Zfp260</a>             | 1.13  | 1.83  | 0.108705  | 0.325457 |
| 3346 | 10379127 | <a href="#">NM_017407</a>          | <a href="#">54141</a>  | sperm associated antigen 5     | <a href="#">Spag5</a>              | 1.13  | 1.767 | 0.119249  | 0.345349 |
| 3347 | 10531794 | <a href="#">ENSMUST00000104987</a> | <a href="#">72145</a>  | WD repeat and FYVE domain cont | <a href="#">Wdpy3</a>              | 1.13  | 1.996 | 0.0849442 | 0.279978 |
| 3348 | 10549986 | <a href="#">NM_134207</a>          | <a href="#">171241</a> | vomeronal 1 receptor, G6       | <a href="#">V1rg6</a>              | 1.13  | 1.401 | 0.202677  | 0.465349 |
| 3349 | 10599841 | <a href="#">AK082088</a>           | <a href="#">331424</a> | RIKEN cDNA C230004F18 gene     | <a href="#">C230004F18Rik</a>      | 1.13  | 0.33  | 0.750423  | 0.894477 |
| 3350 | 10411119 | <a href="#">NM_133905</a>          | <a href="#">100715</a> | PAP associated domain containi | <a href="#">Papd4</a>              | 1.13  | 2.004 | 0.0839404 | 0.277752 |
| 3351 | 10528385 | <a href="#">NM_011261</a>          | <a href="#">19699</a>  | reelin                         | <a href="#">Reln</a>               | 1.13  | 1.58  | 0.156815  | 0.403187 |
| 3352 | 10461402 | <a href="#">NM_010239</a>          | <a href="#">14319</a>  | ferritin heavy chain 1         | <a href="#">Fth1</a>               | 1.13  | 1.833 | 0.108251  | 0.324616 |
| 3353 | 10586933 | <a href="#">NM_010890</a>          | <a href="#">17999</a>  | neural precursor cell expresse | <a href="#">Nedd4</a>              | 1.13  | 2.769 | 0.0269154 | 0.133497 |
| 3354 | 10428370 | <a href="#">NM_175456</a>          | <a href="#">223513</a> | actin-binding Rho activating p | <a href="#">Abra</a>               | 1.13  | 1.709 | 0.129881  | 0.361535 |
| 3355 | 10504884 | <a href="#">BC052696</a>           | <a href="#">66665</a>  | RIKEN cDNA 5730528L13 gene     | <a href="#">5730528L13Rik</a>      | 1.13  | 1.463 | 0.18563   | 0.443587 |
| 3356 | 10503647 | <a href="#">NM_030733</a>          | <a href="#">81006</a>  | G protein-coupled receptor 63  | <a href="#">Gpr63</a>              | 1.13  | 2.338 | 0.0509602 | 0.203571 |
| 3357 | 10384885 | <a href="#">NM_175836</a>          | <a href="#">20742</a>  | spectrin beta 2                | <a href="#">Sponb2</a>             | 1.13  | 1.688 | 0.13396   | 0.368904 |
| 3358 | 10411804 | <a href="#">ENSMUST00000099202</a> | <a href="#">328329</a> | microtubule associated serine/ | <a href="#">Mast4</a>              | 1.129 | 1.47  | 0.183659  | 0.440916 |
| 3359 | 10406736 | <a href="#">NM_010170</a>          | <a href="#">14064</a>  | coagulation factor II (thrombi | <a href="#">F2rl2</a>              | 1.129 | 1.219 | 0.261078  | 0.535632 |
| 3360 | 10496324 | <a href="#">NM_026228</a>          | <a href="#">67547</a>  | solute carrier family 39 (meta | <a href="#">Slc39a8</a>            | 1.129 | 0.868 | 0.413543  | 0.677091 |
| 3361 | 10495120 | <a href="#">NM_007696</a>          | <a href="#">12659</a>  | oviductal glycoprotein 1       | <a href="#">Ovgp1</a>              | 1.129 | 1.083 | 0.313623  | 0.59037  |
| 3362 | 10578941 | <a href="#">NM_153110</a>          | <a href="#">260296</a> | tripartite motif-containing 61 | <a href="#">Trim61</a>             | 1.129 | 2.886 | 0.0227005 | 0.119309 |
| 3363 | 10354203 |                                    |                        |                                |                                    | 1.129 | 0.869 | 0.412894  | 0.676379 |
| 3364 | 10462480 | <a href="#">NM_031249</a>          | <a href="#">83410</a>  | cleavage stimulation factor, 3 | <a href="#">Cstf2t</a>             | 1.129 | 1.567 | 0.159775  | 0.407118 |
| 3365 | 10579736 | <a href="#">BC055692</a>           | <a href="#">66818</a>  | RIKEN cDNA 9130011J15 gene     | <a href="#">9130011J15Rik</a>      | 1.129 | 0.962 | 0.367101  | 0.638059 |
| 3366 | 10597648 | <a href="#">NM_010851</a>          | <a href="#">17874</a>  | myeloid differentiation primar | <a href="#">Myd88</a>              | 1.129 | 1.05  | 0.327571  | 0.603902 |
| 3367 | 10425066 | <a href="#">NM_007780</a>          | <a href="#">12983</a>  | colony stimulating factor 2 re | <a href="#">Csf2rb</a>             | 1.129 | 1.565 | 0.16024   | 0.407591 |
| 3368 | 10546510 | <a href="#">NM_008377</a>          | <a href="#">16206</a>  | leucine-rich repeats and immun | <a href="#">Lrig1</a>              | 1.129 | 0.911 | 0.391616  | 0.659944 |
| 3369 | 10497475 | <a href="#">NM_175086</a>          | <a href="#">11608</a>  | angiotensin II receptor, type  | <a href="#">Agtr1b</a>             | 1.129 | 1.573 | 0.158466  | 0.405348 |
| 3370 | 10361705 | <a href="#">AK010852</a>           | <a href="#">70097</a>  | SAM and SH3 domain containing  | <a href="#">Sash1</a>              | 1.129 | 1.586 | 0.155486  | 0.400991 |
| 3371 | 10442143 | <a href="#">ENSMUST00000095633</a> | <a href="#">381065</a> | predicted gene, EG381065       | <a href="#">EG381065</a>           | 1.129 | 1.871 | 0.102231  | 0.313502 |

|      |          |                                    |                        |                                |                                    |       |       |           |          |
|------|----------|------------------------------------|------------------------|--------------------------------|------------------------------------|-------|-------|-----------|----------|
| 3372 | 10372324 | <a href="#">NM_009306</a>          | <a href="#">20979</a>  | synaptotagmin I                | <a href="#">Syt1</a>               | 1.129 | 1.545 | 0.164893  | 0.414961 |
| 3373 | 10579841 |                                    |                        |                                |                                    | 1.129 | 2.076 | 0.0753798 | 0.259624 |
| 3374 | 10480813 | <a href="#">BC085507</a>           | <a href="#">227624</a> | RIKEN cDNA B230208H17 gene     | <a href="#">B230208H17Rik</a>      | 1.129 | 1.773 | 0.118182  | 0.343153 |
| 3375 | 10429926 | <a href="#">NM_010046</a>          | <a href="#">13350</a>  | diacylglycerol O-acyltransfera | <a href="#">Dgat1</a>              | 1.129 | 2.092 | 0.0736273 | 0.256428 |
| 3376 | 10456383 | <a href="#">NM_053261</a>          | <a href="#">114663</a> | inositol (myo)-1(or 4)-monopho | <a href="#">Impa2</a>              | 1.129 | 1.379 | 0.209246  | 0.474354 |
| 3377 | 10583215 | <a href="#">NM_023858</a>          | <a href="#">77116</a>  | myotubularin related protein 2 | <a href="#">Mtmr2</a>              | 1.128 | 1.567 | 0.159905  | 0.407256 |
| 3378 | 10375343 | <a href="#">NM_028862</a>          | <a href="#">74315</a>  | ring finger protein 145        | <a href="#">Rnf145</a>             | 1.128 | 2.301 | 0.0538735 | 0.210688 |
| 3379 | 10532517 | <a href="#">NM_021351</a>          | <a href="#">12959</a>  | crystallin, beta A4            | <a href="#">Cryba4</a>             | 1.128 | 1.881 | 0.100798  | 0.310816 |
| 3380 | 10527252 | <a href="#">NM_013557</a>          | <a href="#">15467</a>  | eukaryotic translation initiat | <a href="#">Eif2ak1</a>            | 1.128 | 1.068 | 0.319848  | 0.596635 |
| 3381 | 10511156 | <a href="#">NM_207678</a>          | <a href="#">56036</a>  | cyclin L2                      | <a href="#">Ccnl2</a>              | 1.128 | 1.479 | 0.181326  | 0.43738  |
| 3382 | 10448064 | <a href="#">BC012016</a>           | <a href="#">213389</a> | PR domain containing 9         | <a href="#">Prdm9</a>              | 1.128 | 1.861 | 0.103855  | 0.316823 |
| 3383 | 10453461 | <a href="#">NM_001081034</a>       | <a href="#">225055</a> | F-box protein 11               | <a href="#">Fbxo11</a>             | 1.128 | 2.73  | 0.0284901 | 0.138514 |
| 3384 | 10499560 | <a href="#">NM_001037722</a>       | <a href="#">11490</a>  | a disintegrin and metallopepti | <a href="#">Adam15</a>             | 1.128 | 2.719 | 0.0289767 | 0.14001  |
| 3385 | 10489253 | <a href="#">NM_177263</a>          | <a href="#">320799</a> | zinc fingers and homeoboxes 3  | <a href="#">Zhx3</a>               | 1.128 | 2.079 | 0.0750735 | 0.259103 |
| 3386 | 10451372 | <a href="#">NM_175168</a>          | <a href="#">71461</a>  | PTK7 protein tyrosine kinase 7 | <a href="#">Ptk7</a>               | 1.128 | 2.151 | 0.0673797 | 0.242464 |
| 3387 | 10362003 | <a href="#">AK155606</a>           | <a href="#">619323</a> | RIKEN cDNA F730021E23 gene     | <a href="#">F730021E23Rik</a>      | 1.128 | 1.721 | 0.127619  | 0.358255 |
| 3388 | 10374998 | <a href="#">NM_175490</a>          | <a href="#">237716</a> | G protein-coupled receptor 75  | <a href="#">Gpr75</a>              | 1.128 | 2.541 | 0.0376511 | 0.167352 |
| 3389 | 10560035 | <a href="#">BC094341</a>           | <a href="#">232875</a> | zinc finger and SCAN domain co | <a href="#">Zscan18</a>            | 1.128 | 1.636 | 0.144615  | 0.385933 |
| 3390 | 10498707 | <a href="#">NM_198864</a>          | <a href="#">386750</a> | SLIT and NTRK-like family, mem | <a href="#">Slitrk3</a>            | 1.128 | 1.785 | 0.11615   | 0.33888  |
| 3391 | 10446027 | <a href="#">NM_013733</a>          | <a href="#">27221</a>  | chromatin assembly factor 1, s | <a href="#">Chaf1a</a>             | 1.128 | 1.906 | 0.0971598 | 0.303538 |
| 3392 | 10521182 | <a href="#">BC099925</a>           | <a href="#">231128</a> | cDNA sequence BC037112         | <a href="#">BC037112</a>           | 1.128 | 2.332 | 0.0513764 | 0.204731 |
| 3393 | 10397052 | <a href="#">ENSMUST00000071028</a> | <a href="#">791340</a> | predicted gene, ENSMUSG0000005 | <a href="#">ENSMUSG00000056729</a> | 1.128 | 1.599 | 0.152546  | 0.396392 |
| 3394 | 10354845 | <a href="#">NM_008765</a>          | <a href="#">18393</a>  | origin recognition complex, su | <a href="#">Ore2l</a>              | 1.128 | 1.41  | 0.200206  | 0.462134 |
| 3395 | 10360848 | <a href="#">NM_133684</a>          | <a href="#">67247</a>  | MOCO sulphurase C-terminal dom | <a href="#">Mosc2</a>              | 1.128 | 1.477 | 0.182071  | 0.438564 |
| 3396 | 10536353 | <a href="#">NM_010057</a>          | <a href="#">13396</a>  | distal-less homeobox 6         | <a href="#">Dlx6</a>               | 1.128 | 1.942 | 0.092035  | 0.293984 |
| 3397 | 10424833 | <a href="#">NM_026859</a>          | <a href="#">68877</a>  | MAF1 homolog (S. cerevisiae)   | <a href="#">Maf1</a>               | 1.128 | 1.985 | 0.0862969 | 0.282193 |
| 3398 | 10487513 | <a href="#">NM_008569</a>          | <a href="#">17222</a>  | anaphase promoting complex sub | <a href="#">Anape1</a>             | 1.128 | 2.837 | 0.0243663 | 0.125168 |
| 3399 | 10459590 | <a href="#">NM_008977</a>          | <a href="#">19255</a>  | protein tyrosine phosphatase,  | <a href="#">Ptpn2</a>              | 1.127 | 1.368 | 0.212374  | 0.477959 |
| 3400 | 10602385 | <a href="#">NM_008824</a>          | <a href="#">18639</a>  | 6-phosphofructo-2-kinase/fruct | <a href="#">Pfkfb1</a>             | 1.127 | 1.85  | 0.105474  | 0.3201   |
| 3401 | 10441987 | <a href="#">NM_007690</a>          | <a href="#">12648</a>  | chromodomain helicase DNA bind | <a href="#">Chd1</a>               | 1.127 | 2.048 | 0.0786304 | 0.266888 |
| 3402 | 10489051 | <a href="#">AK133873</a>           | <a href="#">632764</a> | predicted gene, ENSMUSG0000007 | <a href="#">ENSMUSG00000074630</a> | 1.127 | 1.003 | 0.348323  | 0.622132 |
| 3403 | 10428374 | <a href="#">XR_030860</a>          | <a href="#">432947</a> | similar to GC-rich promoter bi | <a href="#">LOC432947</a>          | 1.127 | 0.94  | 0.37766   | 0.647469 |
| 3404 | 10523905 | <a href="#">NM_013827</a>          | <a href="#">17765</a>  | metal response element binding | <a href="#">Mtf2</a>               | 1.127 | 2.482 | 0.0410893 | 0.176721 |
| 3405 | 10557106 | <a href="#">NM_001081327</a>       | <a href="#">195646</a> | heparan sulfate (glucosamine)  | <a href="#">Hs3st2</a>             | 1.127 | 1.163 | 0.281841  | 0.557053 |
| 3406 | 10474545 | <a href="#">NM_133649</a>          | <a href="#">107723</a> | solute carrier family 12, memb | <a href="#">Slc12a6</a>            | 1.127 | 1.614 | 0.149212  | 0.391598 |
| 3407 | 10489850 | <a href="#">NM_001033196</a>       | <a href="#">98999</a>  | zinc finger, NFX1-type contain | <a href="#">Znfx1</a>              | 1.127 | 2.1   | 0.072691  | 0.254172 |
| 3408 | 10439409 | <a href="#">AK169533</a>           | <a href="#">414072</a> | cDNA sequence BC031361         | <a href="#">BC031361</a>           | 1.127 | 1.11  | 0.302805  | 0.578887 |
| 3409 | 10388958 | <a href="#">NM_001033711</a>       | <a href="#">14017</a>  | ecotropic viral integration si | <a href="#">Evi2a</a>              | 1.127 | 1.655 | 0.140724  | 0.379507 |
| 3410 | 10362363 | <a href="#">NM_026138</a>          | <a href="#">67412</a>  | RIKEN cDNA 6330407J23 gene     | <a href="#">6330407J23Rik</a>      | 1.127 | 0.751 | 0.476468  | 0.727606 |
| 3411 | 10501372 |                                    |                        |                                |                                    | 1.127 | 1.958 | 0.0898359 | 0.289248 |
| 3412 | 10363868 | <a href="#">NM_024244</a>          | <a href="#">71721</a>  | RIKEN cDNA 1200015N20 gene     | <a href="#">1200015N20Rik</a>      | 1.127 | 1.37  | 0.211843  | 0.477389 |
| 3413 | 10418038 | <a href="#">NM_145459</a>          | <a href="#">218820</a> | zinc finger protein 503        | <a href="#">Zfp503</a>             | 1.127 | 2.127 | 0.0698221 | 0.24761  |
| 3414 | 10521371 | <a href="#">NM_172708</a>          | <a href="#">231134</a> | docking protein 7              | <a href="#">Dok7</a>               | 1.127 | 2.608 | 0.0341002 | 0.156233 |
| 3415 | 10366707 | <a href="#">NM_016847</a>          | <a href="#">54140</a>  | arginine vasopressin receptor  | <a href="#">Avpr1a</a>             | 1.127 | 0.905 | 0.394486  | 0.662113 |
| 3416 | 10601771 | <a href="#">NM_030066</a>          | <a href="#">78248</a>  | armadillo repeat containing, X | <a href="#">Armcx1</a>             | 1.127 | 1.91  | 0.0965667 | 0.302436 |
| 3417 | 10453256 | <a href="#">NM_153512</a>          | <a href="#">225030</a> | potassium voltage-gated channe | <a href="#">Keng3</a>              | 1.127 | 1.735 | 0.125047  | 0.354043 |
| 3418 | 10463428 |                                    |                        |                                |                                    | 1.127 | 0.939 | 0.377883  | 0.647641 |
| 3419 | 10553635 | <a href="#">AK140288</a>           | <a href="#">320845</a> | RIKEN cDNA A230056P14 gene     | <a href="#">A230056P14Rik</a>      | 1.126 | 1.587 | 0.155238  | 0.400794 |
| 3420 | 10563114 | <a href="#">NR_000002</a>          | <a href="#">27209</a>  | small nucleolar RNA, C/D box 3 | <a href="#">Snord32a</a>           | 1.126 | 0.864 | 0.415611  | 0.678743 |
| 3421 | 10599032 | <a href="#">NM_175180</a>          | <a href="#">72404</a>  | WD repeat domain 44            | <a href="#">Wdr44</a>              | 1.126 | 1.686 | 0.134468  | 0.369777 |

|      |          |                                    |                        |                                |                               |       |       |           |          |
|------|----------|------------------------------------|------------------------|--------------------------------|-------------------------------|-------|-------|-----------|----------|
| 3422 | 10444587 |                                    |                        |                                |                               | 1.126 | 0.259 | 0.802613  | 0.919965 |
| 3423 | 10535586 | <a href="#">NM_001038627</a>       | <a href="#">75788</a>  | SMAD specific E3 ubiquitin pro | <a href="#">Smurf1</a>        | 1.126 | 1.417 | 0.198341  | 0.459233 |
| 3424 | 10386219 | <a href="#">NM_011758</a>          | <a href="#">22698</a>  | zinc finger protein 39         | <a href="#">Zfp39</a>         | 1.126 | 1.622 | 0.147549  | 0.389587 |
| 3425 | 10402440 | <a href="#">NM_010351</a>          | <a href="#">14836</a>  | goosecoid homeobox             | <a href="#">Gsc</a>           | 1.126 | 1.419 | 0.197584  | 0.458132 |
| 3426 | 10436449 |                                    |                        |                                |                               | 1.126 | 1.205 | 0.26628   | 0.541183 |
| 3427 | 10575619 | <a href="#">NM_020584</a>          | <a href="#">57321</a>  | telomeric repeat binding facto | <a href="#">Terf2ip</a>       | 1.126 | 2.146 | 0.0678715 | 0.243316 |
| 3428 | 10580953 |                                    |                        |                                |                               | 1.126 | 1.043 | 0.330726  | 0.60702  |
| 3429 | 10573867 | <a href="#">NM_011250</a>          | <a href="#">19651</a>  | retinoblastoma-like 2          | <a href="#">Rbl2</a>          | 1.126 | 1.829 | 0.108807  | 0.325589 |
| 3430 | 10464218 | <a href="#">NM_145505</a>          | <a href="#">226252</a> | expressed sequence AI450540    | <a href="#">AI450540</a>      | 1.126 | 1.765 | 0.119577  | 0.345865 |
| 3431 | 10544563 | <a href="#">NM_020589</a>          | <a href="#">68910</a>  | zinc finger protein 467        | <a href="#">Zfp467</a>        | 1.126 | 2.173 | 0.0651749 | 0.238029 |
| 3432 | 10376733 | <a href="#">NM_008928</a>          | <a href="#">26397</a>  | mitogen-activated protein kina | <a href="#">Map2k3</a>        | 1.126 | 1.887 | 0.0998372 | 0.308845 |
| 3433 | 10432540 | <a href="#">NM_001113545</a>       | <a href="#">65970</a>  | LIM domain and actin binding 1 | <a href="#">Lima1</a>         | 1.126 | 1.506 | 0.174657  | 0.427722 |
| 3434 | 10532965 | <a href="#">NM_016698</a>          | <a href="#">50849</a>  | ring finger protein 10         | <a href="#">Rnf10</a>         | 1.125 | 1.533 | 0.167841  | 0.419086 |
| 3435 | 10597973 | <a href="#">NM_033322</a>          | <a href="#">93730</a>  | leucine zipper transcription f | <a href="#">Lztf1</a>         | 1.125 | 1.462 | 0.185999  | 0.44418  |
| 3436 | 10431948 | <a href="#">NM_028003</a>          | <a href="#">71919</a>  | RNA polymerase II associated p | <a href="#">Rpap3</a>         | 1.125 | 0.898 | 0.398306  | 0.664598 |
| 3437 | 10492113 | <a href="#">BC089522</a>           | <a href="#">320604</a> | RIKEN cDNA A730037C10 gene     | <a href="#">A730037C10Rik</a> | 1.125 | 1.513 | 0.17274   | 0.425061 |
| 3438 | 10396358 | <a href="#">NM_008910</a>          | <a href="#">19042</a>  | protein phosphatase 1A, magnes | <a href="#">Ppm1a</a>         | 1.125 | 2.096 | 0.0731756 | 0.255191 |
| 3439 | 10408185 | <a href="#">NM_175938</a>          | <a href="#">238555</a> | butyrophilin, subfamily 2, mem | <a href="#">Btn2a2</a>        | 1.125 | 1.724 | 0.127036  | 0.357139 |
| 3440 | 10477032 | <a href="#">ENSMUST00000060196</a> | <a href="#">108832</a> | RIKEN cDNA 5430405G05 gene     | <a href="#">5430405G05Rik</a> | 1.125 | 1.442 | 0.191213  | 0.450375 |
| 3441 | 10345704 |                                    |                        |                                |                               | 1.125 | 1.24  | 0.253907  | 0.528198 |
| 3442 | 10534281 | <a href="#">NM_009990</a>          | <a href="#">269713</a> | CAP-GLY domain containing link | <a href="#">Clip2</a>         | 1.125 | 2.418 | 0.0451926 | 0.188022 |
| 3443 | 10397790 |                                    |                        |                                |                               | 1.125 | 2.768 | 0.0269729 | 0.133688 |
| 3444 | 10529273 | <a href="#">NM_013502</a>          | <a href="#">13016</a>  | C-terminal binding protein 1   | <a href="#">Ctbp1</a>         | 1.125 | 1.782 | 0.116648  | 0.340054 |
| 3445 | 10565002 | <a href="#">NM_173863</a>          | <a href="#">70461</a>  | CREB regulated transcription c | <a href="#">Crtc3</a>         | 1.125 | 2.902 | 0.0221733 | 0.117237 |
| 3446 | 10389795 | <a href="#">ENSMUST00000053420</a> | <a href="#">20913</a>  | syntaxin binding protein 4     | <a href="#">Stxbp4</a>        | 1.125 | 0.962 | 0.367138  | 0.63807  |
| 3447 | 10414173 | <a href="#">XR_033408</a>          | <a href="#">382871</a> | similar to Non-SMC element 2 h | <a href="#">LOC382871</a>     | 1.125 | 0.887 | 0.403734  | 0.6686   |
| 3448 | 10415608 | <a href="#">NM_009376</a>          | <a href="#">21821</a>  | intraflagellar transport 88 ho | <a href="#">Ift88</a>         | 1.125 | 1.028 | 0.337048  | 0.612719 |
| 3449 | 10500272 | <a href="#">BC132471</a>           | <a href="#">229599</a> | gene model 129, (NCBI)         | <a href="#">Gm129</a>         | 1.125 | 0.621 | 0.553652  | 0.78319  |
| 3450 | 10589848 | <a href="#">NM_001083319</a>       | <a href="#">22221</a>  | upstream binding protein 1     | <a href="#">Ubp1</a>          | 1.125 | 2.794 | 0.0259386 | 0.130458 |
| 3451 | 10486664 | <a href="#">NM_013513</a>          | <a href="#">13828</a>  | erythrocyte protein band 4.2   | <a href="#">Epb4.2</a>        | 1.125 | 0.331 | 0.749943  | 0.894399 |
| 3452 | 10405745 |                                    |                        |                                |                               | 1.125 | 1.398 | 0.203481  | 0.466435 |
| 3453 | 10508759 | <a href="#">NM_011284</a>          | <a href="#">19891</a>  | replication protein A2         | <a href="#">Rpa2</a>          | 1.125 | 1.724 | 0.12718   | 0.35745  |
| 3454 | 10466606 | <a href="#">NM_010730</a>          | <a href="#">16952</a>  | annexin A1                     | <a href="#">Anxa1</a>         | 1.125 | 1.254 | 0.249069  | 0.522866 |
| 3455 | 10484805 | <a href="#">NM_001011761</a>       | <a href="#">257921</a> | olfactory receptor 1229        | <a href="#">Olf1229</a>       | 1.124 | 2.323 | 0.0520697 | 0.206366 |
| 3456 | 10495316 | <a href="#">NM_019976</a>          | <a href="#">56742</a>  | proline/serine-rich coiled-coi | <a href="#">Psre1</a>         | 1.124 | 1.423 | 0.196498  | 0.457018 |
| 3457 | 10493640 | <a href="#">ENSMUST00000029548</a> | <a href="#">77595</a>  | nucleoporin 210-like           | <a href="#">Nup210l</a>       | 1.124 | 1.275 | 0.241698  | 0.514457 |
| 3458 | 10475000 | <a href="#">BC117848</a>           | <a href="#">76246</a>  | Rtf1, Paf1/RNA polymerase II c | <a href="#">Rtf1</a>          | 1.124 | 1.436 | 0.192928  | 0.452347 |
| 3459 | 10460196 | <a href="#">BC019471</a>           | <a href="#">72056</a>  | RIKEN cDNA 1810055G02 gene     | <a href="#">1810055G02Rik</a> | 1.124 | 1.491 | 0.178276  | 0.433019 |
| 3460 | 10426261 | <a href="#">NM_021423</a>          | <a href="#">58234</a>  | SH3/ankyrin domain gene 3      | <a href="#">Shank3</a>        | 1.124 | 2.202 | 0.062428  | 0.231292 |
| 3461 | 10430825 | <a href="#">NM_025639</a>          | <a href="#">66570</a>  | centromere protein M           | <a href="#">Cenpm</a>         | 1.124 | 1.325 | 0.225757  | 0.496144 |
| 3462 | 10555108 | <a href="#">NM_023671</a>          | <a href="#">12729</a>  | chloride channel, nucleotide-s | <a href="#">Clns1a</a>        | 1.124 | 1.379 | 0.209067  | 0.474049 |
| 3463 | 10590957 | <a href="#">NM_010242</a>          | <a href="#">14345</a>  | fucosyltransferase 4           | <a href="#">Fut4</a>          | 1.124 | 1.386 | 0.207227  | 0.471647 |
| 3464 | 10590445 | <a href="#">NM_133741</a>          | <a href="#">20623</a>  | SNF related kinase             | <a href="#">Snrk</a>          | 1.124 | 1.16  | 0.283113  | 0.55841  |
| 3465 | 10410892 | <a href="#">NM_145452</a>          | <a href="#">218397</a> | RAS p21 protein activator 1    | <a href="#">Rasa1</a>         | 1.124 | 1.517 | 0.171704  | 0.423956 |
| 3466 | 10547396 | <a href="#">NM_009525</a>          | <a href="#">22419</a>  | wingless-related MMTV integrat | <a href="#">Wnt5b</a>         | 1.124 | 2.049 | 0.0784258 | 0.266489 |
| 3467 | 10541532 | <a href="#">NM_021899</a>          | <a href="#">60611</a>  | forkhead box J2                | <a href="#">Foxj2</a>         | 1.124 | 2.16  | 0.0664776 | 0.240889 |
| 3468 | 10501924 | <a href="#">NM_031186</a>          | <a href="#">83398</a>  | N-deacetylase/N-sulfotransfera | <a href="#">Ndst3</a>         | 1.124 | 0.735 | 0.485446  | 0.733791 |
| 3469 | 10459962 | <a href="#">NM_015805</a>          | <a href="#">50771</a>  | ATPase, class II, type 9B      | <a href="#">Atp9b</a>         | 1.124 | 1.44  | 0.191885  | 0.451201 |
| 3470 | 10478772 | <a href="#">NM_001085495</a>       | <a href="#">99371</a>  | ADP-ribosylation factor guanin | <a href="#">Arfgef2</a>       | 1.124 | 1.536 | 0.167091  | 0.418103 |
| 3471 | 10571849 | <a href="#">NM_015791</a>          | <a href="#">50753</a>  | F-box protein 8                | <a href="#">Fbxo8</a>         | 1.124 | 1.85  | 0.105569  | 0.320207 |
| 3472 | 10410393 | <a href="#">NM_172480</a>          | <a href="#">210009</a> | 5-methyltetrahydrofolate-homoc | <a href="#">Mtr</a>           | 1.124 | 0.892 | 0.401079  | 0.666661 |
| 3473 | 10376245 | <a href="#">NM_001113325</a>       | <a href="#">14799</a>  | glutamate receptor, ionotropic | <a href="#">Gria1</a>         | 1.123 | 0.736 | 0.485116  | 0.733502 |
| 3474 | 10413012 | <a href="#">AK034234</a>           | <a href="#">73068</a>  | fucosyltransferase 11          | <a href="#">Fut11</a>         | 1.123 | -0.37 | 0.722003  | 0.879076 |

|      |          |                                    |                        |                                 |                               |       |       |           |          |
|------|----------|------------------------------------|------------------------|---------------------------------|-------------------------------|-------|-------|-----------|----------|
| 3475 | 10605999 |                                    |                        |                                 |                               | 1.123 | 1.902 | 0.0976731 | 0.304546 |
| 3476 | 10481931 | <a href="#">NM_028716</a>          | <a href="#">74016</a>  | PHD finger protein 19           | <a href="#">Phf19</a>         | 1.123 | 1.762 | 0.120211  | 0.346569 |
| 3477 | 10447065 | <a href="#">BC024059</a>           | <a href="#">381110</a> | expressed sequence AW061290     | <a href="#">AW061290</a>      | 1.123 | 0.906 | 0.394193  | 0.661914 |
| 3478 | 10487480 | <a href="#">NM_001113179</a>       | <a href="#">12235</a>  | budding uninhibited by benzimi  | <a href="#">Bub1</a>          | 1.123 | 1.507 | 0.174399  | 0.427379 |
| 3479 | 10461909 | <a href="#">BC016495</a>           | <a href="#">225994</a> | cDNA sequence BC016495          | <a href="#">BC016495</a>      | 1.123 | 0.742 | 0.481553  | 0.730886 |
| 3480 | 10390473 | <a href="#">NM_054051</a>          | <a href="#">108083</a> | phosphatidylinositol-5-phospha  | <a href="#">Pip4k2b</a>       | 1.123 | 1.114 | 0.301102  | 0.5773   |
| 3481 | 10588826 | <a href="#">NM_013785</a>          | <a href="#">27399</a>  | inositol hexaphosphate kinase   | <a href="#">Ihpk1</a>         | 1.123 | 2.163 | 0.0661869 | 0.240085 |
| 3482 | 10543600 | <a href="#">NM_001029985</a>       | <a href="#">333088</a> | cysteine rich BMP regulator 2   | <a href="#">Crim2</a>         | 1.123 | 2.459 | 0.0425191 | 0.180698 |
| 3483 | 10460666 | <a href="#">NM_008520</a>          | <a href="#">16998</a>  | latent transforming growth fac  | <a href="#">Ltp3</a>          | 1.123 | 2.357 | 0.0494971 | 0.199917 |
| 3484 | 10564667 | <a href="#">NM_008746</a>          | <a href="#">18213</a>  | neurotrophic tyrosine kinase,   | <a href="#">Ntrk3</a>         | 1.123 | 1.357 | 0.215692  | 0.482806 |
| 3485 | 10458419 | <a href="#">BC125010</a>           | <a href="#">83885</a>  | solute carrier family 25 (mito  | <a href="#">Slc25a2</a>       | 1.123 | 2.16  | 0.0664219 | 0.240731 |
| 3486 | 10418275 | <a href="#">NM_177111</a>          | <a href="#">320234</a> | coiled-coil domain containing   | <a href="#">Ccdc66</a>        | 1.123 | 1.682 | 0.13517   | 0.370646 |
| 3487 | 10570144 | <a href="#">NM_001113518</a>       | <a href="#">54126</a>  | Rho guanine nucleotide exchang  | <a href="#">Arhgef7</a>       | 1.122 | 2.339 | 0.0508659 | 0.203346 |
| 3488 | 10437712 | <a href="#">NM_145931</a>          | <a href="#">106205</a> | zinc finger CCCH type containi  | <a href="#">Zc3h7a</a>        | 1.122 | 1.938 | 0.0925762 | 0.294729 |
| 3489 | 10531707 | <a href="#">NM_001115010</a>       | <a href="#">231506</a> | lin-54 homolog (C. elegans)     | <a href="#">Lin54</a>         | 1.122 | 1.448 | 0.189524  | 0.448035 |
| 3490 | 10389627 | <a href="#">NM_053269</a>          | <a href="#">114714</a> | Rad51 homolog c (S. cerevisiae) | <a href="#">Rad51c</a>        | 1.122 | 1.465 | 0.185013  | 0.442624 |
| 3491 | 10459618 |                                    |                        |                                 |                               | 1.122 | 2.499 | 0.0401144 | 0.174258 |
| 3492 | 10499593 | <a href="#">NM_029974</a>          | <a href="#">77772</a>  | DC-STAMP domain containing 1    | <a href="#">Dcst1</a>         | 1.122 | 2.157 | 0.0667943 | 0.24144  |
| 3493 | 10364361 | <a href="#">NM_015790</a>          | <a href="#">50723</a>  | icos ligand                     | <a href="#">Icosl</a>         | 1.122 | 2.168 | 0.0656517 | 0.238799 |
| 3494 | 10598594 |                                    |                        |                                 |                               | 1.122 | 0.635 | 0.544801  | 0.776964 |
| 3495 | 10488892 | <a href="#">NM_019828</a>          | <a href="#">56407</a>  | transient receptor potential c  | <a href="#">Trpc4ap</a>       | 1.122 | 1.038 | 0.332834  | 0.608828 |
| 3496 | 10404965 | <a href="#">NM_146042</a>          | <a href="#">218215</a> | ring finger protein 144B        | <a href="#">Rnf144b</a>       | 1.122 | 1.062 | 0.322409  | 0.599241 |
| 3497 | 10379677 | <a href="#">NM_001013386</a>       | <a href="#">276952</a> | RAS-like, family 10, member B   | <a href="#">Ras110b</a>       | 1.122 | 1.088 | 0.311807  | 0.58828  |
| 3498 | 10531645 | <a href="#">NM_016690</a>          | <a href="#">50926</a>  | heterogeneous nuclear ribonucl  | <a href="#">Hnrpdl</a>        | 1.122 | 2.301 | 0.0538464 | 0.210683 |
| 3499 | 10390542 | <a href="#">NM_031173</a>          | <a href="#">12295</a>  | calcium channel, voltage-depen  | <a href="#">Cacnb1</a>        | 1.122 | 1.834 | 0.108028  | 0.324223 |
| 3500 | 10389797 | <a href="#">NM_011505</a>          | <a href="#">20913</a>  | syntaxin binding protein 4      | <a href="#">Stxbp4</a>        | 1.122 | 1.75  | 0.122287  | 0.3496   |
| 3501 | 10415019 |                                    |                        |                                 |                               | 1.122 | 1.601 | 0.152182  | 0.395933 |
| 3502 | 10547274 | <a href="#">NM_028335</a>          | <a href="#">72720</a>  | zinc finger protein 248         | <a href="#">Zfp248</a>        | 1.122 | 1.124 | 0.297159  | 0.573644 |
| 3503 | 10567797 | <a href="#">NM_028816</a>          | <a href="#">74204</a>  | exportin 6                      | <a href="#">Xpo6</a>          | 1.122 | 1.368 | 0.212278  | 0.477897 |
| 3504 | 10524327 | <a href="#">NM_001081235</a>       | <a href="#">433938</a> | meningioma 1                    | <a href="#">Mn1</a>           | 1.121 | 2.053 | 0.0779973 | 0.265568 |
| 3505 | 10561166 |                                    |                        |                                 |                               | 1.121 | 1.007 | 0.346548  | 0.620651 |
| 3506 | 10378341 | <a href="#">NM_029031</a>          | <a href="#">74637</a>  | sedoheptulokinase               | <a href="#">Shpk</a>          | 1.121 | 1.556 | 0.162419  | 0.411033 |
| 3507 | 10367045 | <a href="#">NM_069040</a>          | <a href="#">19683</a>  | retinol dehydrogenase 16        | <a href="#">Kdm16</a>         | 1.121 | 1.739 | 0.124385  | 0.353305 |
| 3508 | 10380341 | <a href="#">NM_027569</a>          | <a href="#">70834</a>  | sperm associated antigen 9      | <a href="#">Spag9</a>         | 1.121 | 2.615 | 0.0337616 | 0.155118 |
| 3509 | 10478424 | <a href="#">NM_018753</a>          | <a href="#">54401</a>  | tyrosine 3-monooxygenase/trypt  | <a href="#">Ywhab</a>         | 1.121 | 2.151 | 0.0674009 | 0.242492 |
| 3510 | 10432178 |                                    |                        |                                 |                               | 1.121 | 1.071 | 0.318874  | 0.596082 |
| 3511 | 10536376 | <a href="#">BC020002</a>           | <a href="#">252875</a> | cDNA sequence BC020002          | <a href="#">BC020002</a>      | 1.121 | 0.942 | 0.376581  | 0.646774 |
| 3512 | 10526459 | <a href="#">NM_133914</a>          | <a href="#">54153</a>  | RAS p21 protein activator 4     | <a href="#">Rasa4</a>         | 1.121 | 1.825 | 0.109426  | 0.326934 |
| 3513 | 10557780 |                                    |                        |                                 |                               | 1.121 | 1.461 | 0.186087  | 0.44434  |
| 3514 | 10407192 | <a href="#">NM_178746</a>          | <a href="#">268706</a> | solute carrier family 38, memb  | <a href="#">Slc38a9</a>       | 1.121 | 1.921 | 0.0949973 | 0.299665 |
| 3515 | 10505224 | <a href="#">NM_172468</a>          | <a href="#">209131</a> | sorting nexin family member 30  | <a href="#">Snx30</a>         | 1.121 | 1.47  | 0.183915  | 0.441198 |
| 3516 | 10407513 | <a href="#">NM_172445</a>          | <a href="#">207615</a> | WD repeat domain 37             | <a href="#">Wdr37</a>         | 1.121 | 1.929 | 0.0937962 | 0.297157 |
| 3517 | 10433597 | <a href="#">NM_028964</a>          | <a href="#">74478</a>  | sorting nexin 29                | <a href="#">Snx29</a>         | 1.121 | 1.506 | 0.174425  | 0.427379 |
| 3518 | 10565900 | <a href="#">ENSMUST00000064334</a> | <a href="#">402747</a> | RIKEN cDNA D630004N19 gene      | <a href="#">D630004N19Rik</a> | 1.121 | 1.729 | 0.12624   | 0.355752 |
| 3519 | 10542959 | <a href="#">NM_009748</a>          | <a href="#">12068</a>  | blocked early in transport 1 h  | <a href="#">Bet1</a>          | 1.121 | 0.543 | 0.603709  | 0.814811 |
| 3520 | 10441601 | <a href="#">NM_145968</a>          | <a href="#">72536</a>  | T-cell activation Rho GTPase-a  | <a href="#">Tagap</a>         | 1.121 | 1.247 | 0.251441  | 0.525513 |
| 3521 | 10434133 | <a href="#">NM_010047</a>          | <a href="#">13353</a>  | DiGeorge syndrome critical reg  | <a href="#">Dgcr6</a>         | 1.121 | 2.115 | 0.071132  | 0.250544 |
| 3522 | 10540408 | <a href="#">NM_010585</a>          | <a href="#">16438</a>  | inositol 1,4,5-triphosphate re  | <a href="#">Itp1</a>          | 1.121 | 1.122 | 0.297992  | 0.573995 |
| 3523 | 10374083 | <a href="#">NM_009636</a>          | <a href="#">11568</a>  | AE binding protein 1            | <a href="#">Aebp1</a>         | 1.12  | 1.728 | 0.126432  | 0.356138 |
| 3524 | 10492438 | <a href="#">NM_001037923</a>       | <a href="#">624866</a> | predicted gene, EG624866        | <a href="#">EG624866</a>      | 1.12  | 1.626 | 0.146806  | 0.388752 |
| 3525 | 10569898 | <a href="#">NM_001039578</a>       | <a href="#">213027</a> | ecotropic viral integration si  | <a href="#">Evi5l</a>         | 1.12  | 1.447 | 0.19003   | 0.448738 |
| 3526 | 10504926 | <a href="#">NM_182999</a>          | <a href="#">109331</a> | ring finger protein 20          | <a href="#">Rnf20</a>         | 1.12  | 2.035 | 0.0800775 | 0.269869 |
| 3527 | 10550383 | <a href="#">NM_001081655</a>       | <a href="#">629378</a> | dapper homolog 3, antagonist o  | <a href="#">Dact3</a>         | 1.12  | 2     | 0.0843826 | 0.278735 |
| 3528 | 10545417 | <a href="#">NM_145569</a>          | <a href="#">232087</a> | methionine adenosyltransferase  | <a href="#">Mat2a</a>         | 1.12  | 1.512 | 0.173007  | 0.425494 |
| 3529 | 10565935 | <a href="#">NM_001081116</a>       | <a href="#">207212</a> | Rho guanine nucleotide exchang  | <a href="#">Arhgef17</a>      | 1.12  | 2.279 | 0.0556729 | 0.215398 |

|      |          |                                    |                        |                                |                               |       |       |           |          |
|------|----------|------------------------------------|------------------------|--------------------------------|-------------------------------|-------|-------|-----------|----------|
| 3530 | 10507015 | <a href="#">NM_001048189</a>       | <a href="#">78933</a>  | RIKEN cDNA 4931433A01 gene     | <a href="#">4931433A01Rik</a> | 1.12  | 1.204 | 0.266555  | 0.541262 |
| 3531 | 10399892 | <a href="#">NM_175191</a>          | <a href="#">73010</a>  | G protein-coupled receptor 22  | <a href="#">Gpr22</a>         | 1.12  | 0.986 | 0.355827  | 0.628276 |
| 3532 | 10542885 | <a href="#">NM_026054</a>          | <a href="#">67246</a>  | RIKEN cDNA 2810474O19 gene     | <a href="#">2810474O19Rik</a> | 1.12  | 1.148 | 0.287712  | 0.563484 |
| 3533 | 10550394 | <a href="#">NM_008967</a>          | <a href="#">19222</a>  | prostaglandin I receptor (IP)  | <a href="#">Ptgir</a>         | 1.12  | 1.411 | 0.200027  | 0.461823 |
| 3534 | 10415013 |                                    |                        |                                |                               | 1.12  | 1.778 | 0.117339  | 0.341384 |
| 3535 | 10406733 | <a href="#">NM_028106</a>          | <a href="#">72114</a>  | zinc finger, BED domain contai | <a href="#">Zbed3</a>         | 1.12  | 1.398 | 0.203631  | 0.46673  |
| 3536 | 10566595 | <a href="#">NM_146599</a>          | <a href="#">258592</a> | olfactory receptor 697         | <a href="#">Olfr697</a>       | 1.12  | 1.871 | 0.102228  | 0.313502 |
| 3537 | 10397000 |                                    |                        |                                |                               | 1.12  | 1.484 | 0.180254  | 0.435801 |
| 3538 | 10358459 | <a href="#">NM_145511</a>          | <a href="#">226499</a> | cDNA sequence BC003331         | <a href="#">BC003331</a>      | 1.12  | 1.523 | 0.170427  | 0.422073 |
| 3539 | 10471597 | <a href="#">XM_887818</a>          | <a href="#">623370</a> | predicted gene, EG623370       | <a href="#">EG623370</a>      | 1.12  | 2.148 | 0.067675  | 0.243106 |
| 3540 | 10353048 |                                    |                        |                                |                               | 1.12  | 1.258 | 0.247657  | 0.520853 |
| 3541 | 10493770 | <a href="#">NM_026374</a>          | <a href="#">67781</a>  | interleukin enhancer binding f | <a href="#">Ilf2</a>          | 1.12  | 1.558 | 0.161902  | 0.410216 |
| 3542 | 10554471 | <a href="#">NM_009553</a>          | <a href="#">22691</a>  | zinc finger and SCAN domain co | <a href="#">Zscan2</a>        | 1.12  | 1.392 | 0.205466  | 0.469103 |
| 3543 | 10603308 |                                    |                        |                                |                               | 1.12  | 1.994 | 0.0852117 | 0.280273 |
| 3544 | 10511311 | <a href="#">NM_028097</a>          | <a href="#">72098</a>  | transmembrane protein 68       | <a href="#">Tmem68</a>        | 1.12  | 1.112 | 0.301627  | 0.577839 |
| 3545 | 10600474 |                                    |                        |                                |                               | 1.12  | 1.533 | 0.167867  | 0.419104 |
| 3546 | 10603182 | <a href="#">NM_009707</a>          | <a href="#">11856</a>  | Rho GTPase activating protein  | <a href="#">Arhgap6</a>       | 1.12  | 1.375 | 0.210402  | 0.475953 |
| 3547 | 10515870 | <a href="#">ENSMUST00000046260</a> | <a href="#">230696</a> | expressed sequence AU022252    | <a href="#">AU022252</a>      | 1.12  | 1.367 | 0.212605  | 0.478213 |
| 3548 | 10410370 | <a href="#">BC016248</a>           | <a href="#">235907</a> | zinc finger protein 71, releat | <a href="#">Zfp71-rs1</a>     | 1.119 | 1.039 | 0.332529  | 0.608585 |
| 3549 | 10423358 | <a href="#">AK162044</a>           | <a href="#">211147</a> | membrane-associated ring finge | <a href="#">March11</a>       | 1.119 | 0.003 | 0.99779   | 0.999208 |
| 3550 | 10507059 | <a href="#">NM_177818</a>          | <a href="#">328505</a> | RIKEN cDNA C130057D23 gene     | <a href="#">C130057D23Rik</a> | 1.119 | 0.627 | 0.549707  | 0.779911 |
| 3551 | 10569011 | <a href="#">NM_053088</a>          | <a href="#">73835</a>  | interferon induced transmembra | <a href="#">Ifitm5</a>        | 1.119 | 1.619 | 0.14819   | 0.390374 |
| 3552 | 10415363 | <a href="#">NM_177992</a>          | <a href="#">105446</a> | guanosine monophosphate reduct | <a href="#">Gmpr2</a>         | 1.119 | 1.329 | 0.224198  | 0.494263 |
| 3553 | 10376796 | <a href="#">NM_027817</a>          | <a href="#">71520</a>  | GRB2-related adaptor protein   | <a href="#">Grap</a>          | 1.119 | 2.07  | 0.0760583 | 0.261237 |
| 3554 | 10478169 | <a href="#">NM_145742</a>          | <a href="#">71715</a>  | DEAH (Asp-Glu-Ala-His) box pol | <a href="#">Dhx35</a>         | 1.119 | 1.309 | 0.230826  | 0.501612 |
| 3555 | 10352294 | <a href="#">BC031781</a>           | <a href="#">208768</a> | cDNA sequence BC031781         | <a href="#">BC031781</a>      | 1.119 | 1.228 | 0.257962  | 0.531958 |
| 3556 | 10512129 | <a href="#">NM_022305</a>          | <a href="#">14595</a>  | UDP-Gal:betaGlcNAc beta 1,4-g  | <a href="#">B4galt1</a>       | 1.119 | 1.664 | 0.138754  | 0.376759 |
| 3557 | 10562989 | <a href="#">NM_153679</a>          | <a href="#">78070</a>  | carnitine palmitoyltransferase | <a href="#">Cpt1c</a>         | 1.119 | 2.277 | 0.0558403 | 0.215766 |
| 3558 | 10605357 | <a href="#">NM_181584</a>          | <a href="#">210710</a> | growth factor receptor bound p | <a href="#">Gab3</a>          | 1.119 | 1.492 | 0.177995  | 0.432602 |
| 3559 | 10349314 |                                    |                        |                                |                               | 1.119 | 1.332 | 0.223459  | 0.493403 |
| 3560 | 10537292 | <a href="#">ENSMUST00000101536</a> | <a href="#">67705</a>  | RIKEN cDNA 1810058I24 gene     | <a href="#">1810058I24Rik</a> | 1.119 | 1.401 | 0.202678  | 0.465349 |
| 3561 | 10430873 | <a href="#">NM_145474</a>          | <a href="#">223706</a> | cytochrome P450, family 2, sub | <a href="#">Cyp2d34</a>       | 1.119 | 1.992 | 0.0853957 | 0.280548 |
| 3562 | 10376941 | <a href="#">NM_027660</a>          | <a href="#">71062</a>  | tektin 3                       | <a href="#">Tekt3</a>         | 1.119 | 2.251 | 0.0579957 | 0.220908 |
| 3563 | 10474088 | <a href="#">ENSMUST00000028621</a> | <a href="#">70852</a>  | RIKEN cDNA 4921507L20 gene     | <a href="#">4921507L20Rik</a> | 1.119 | 1.419 | 0.197691  | 0.458331 |
| 3564 | 10452188 | <a href="#">NM_022328</a>          | <a href="#">64144</a>  | myeloid/lymphoid or mixed-line | <a href="#">Mllt1</a>         | 1.118 | 2.301 | 0.0538404 | 0.210683 |
| 3565 | 10599654 | <a href="#">NM_028375</a>          | <a href="#">72865</a>  | CAAX box 1 homolog C (human)   | <a href="#">Cxx1c</a>         | 1.118 | 1.056 | 0.324861  | 0.601266 |
| 3566 | 10414102 | <a href="#">NM_153127</a>          | <a href="#">105450</a> | multimerin 2                   | <a href="#">Mmm2</a>          | 1.118 | 1.119 | 0.29906   | 0.575096 |
| 3567 | 10464949 | <a href="#">NM_153129</a>          | <a href="#">107975</a> | phosphofurin acidic cluster so | <a href="#">Pacs1</a>         | 1.118 | 1.123 | 0.297431  | 0.573687 |
| 3568 | 10384672 | <a href="#">NM_172391</a>          | <a href="#">268390</a> | AHA1, activator of heat shock  | <a href="#">Ahsa2</a>         | 1.118 | 1.429 | 0.19484   | 0.454963 |
| 3569 | 10476620 | <a href="#">NM_021335</a>          | <a href="#">20639</a>  | U2 small nuclear ribonucleopro | <a href="#">Snrpb2</a>        | 1.118 | 1.786 | 0.116036  | 0.338784 |
| 3570 | 10423941 | <a href="#">NM_025736</a>          | <a href="#">66736</a>  | tetratricopeptide repeat domai | <a href="#">Ttc35</a>         | 1.118 | 1.02  | 0.340849  | 0.615921 |
| 3571 | 10508909 |                                    |                        |                                |                               | 1.118 | 1.318 | 0.227975  | 0.49895  |
| 3572 | 10409376 | <a href="#">NM_001033245</a>       | <a href="#">212032</a> | hexokinase 3                   | <a href="#">Hk3</a>           | 1.118 | 1.687 | 0.134236  | 0.369304 |
| 3573 | 10432122 | <a href="#">NM_030121</a>          | <a href="#">78541</a>  | ankyrin repeat and SOCS box-co | <a href="#">Asb8</a>          | 1.118 | 1.496 | 0.177047  | 0.431359 |
| 3574 | 10584803 | <a href="#">BC080764</a>           | <a href="#">76568</a>  | RIKEN cDNA 1500035H01 gene     | <a href="#">1500035H01Rik</a> | 1.118 | 1.164 | 0.281519  | 0.556926 |
| 3575 | 10453166 | <a href="#">NM_001033443</a>       | <a href="#">381113</a> | cyclin-dependent kinase-like 4 | <a href="#">Cdk14</a>         | 1.118 | 1.318 | 0.22792   | 0.49895  |
| 3576 | 10485081 | <a href="#">NM_138306</a>          | <a href="#">104418</a> | diacylglycerol kinase zeta     | <a href="#">Dgkz</a>          | 1.118 | 1.249 | 0.250541  | 0.524406 |
| 3577 | 10585093 |                                    |                        |                                |                               | 1.118 | 1.602 | 0.151827  | 0.395645 |
| 3578 | 10389526 | <a href="#">NM_001003908</a>       | <a href="#">67300</a>  | clathrin, heavy polypeptide (H | <a href="#">Cltc</a>          | 1.118 | 1.466 | 0.184801  | 0.442367 |
| 3579 | 10570397 | <a href="#">NM_027276</a>          | <a href="#">69957</a>  | CDC16 cell division cycle 16 h | <a href="#">Cdc16</a>         | 1.118 | 1.908 | 0.0968139 | 0.303049 |
| 3580 | 10371387 | <a href="#">NM_175451</a>          | <a href="#">216197</a> | cytoskeleton-associated protei | <a href="#">Ckap4</a>         | 1.118 | 2.727 | 0.0286157 | 0.138865 |
| 3581 | 10425037 | <a href="#">NM_177744</a>          | <a href="#">745282</a> | apolipoprotein I 10a           | <a href="#">Apo110a</a>       | 1.118 | 1.834 | 0.107986  | 0.324143 |

| Accession | Gene Symbol | Gene Name                          | Accession              | Gene Name                      | Accession                     | Accession | Accession | Accession | Accession |
|-----------|-------------|------------------------------------|------------------------|--------------------------------|-------------------------------|-----------|-----------|-----------|-----------|
| 3582      | 10419532    | <a href="#">NM_133676</a>          | <a href="#">66246</a>  | O-sialoglycoprotein endopeptid | <a href="#">Osgp</a>          | 1.118     | 1.226     | 0.258615  | 0.532776  |
| 3583      | 10438570    | <a href="#">XR_005142</a>          | <a href="#">76222</a>  | melanoma antigen family F, 1   | <a href="#">Magef1</a>        | 1.118     | 1.11      | 0.302471  | 0.578616  |
| 3584      | 10489503    | <a href="#">NM_001033240</a>       | <a href="#">209351</a> | WAP four-disulfide core domain | <a href="#">Wfdc6a</a>        | 1.118     | 1.243     | 0.252657  | 0.526766  |
| 3585      | 10591628    | <a href="#">NM_177030</a>          | <a href="#">319899</a> | dedicator of cytokinesis 6     | <a href="#">Dock6</a>         | 1.117     | 2.253     | 0.0578324 | 0.220604  |
| 3586      | 10528476    |                                    |                        |                                |                               | 1.117     | 0.469     | 0.653205  | 0.844576  |
| 3587      | 10410756    | <a href="#">NM_134071</a>          | <a href="#">105377</a> | ankyrin repeat domain 32       | <a href="#">Ankrd32</a>       | 1.117     | 1.329     | 0.224279  | 0.494263  |
| 3588      | 10385271    | <a href="#">NM_009831</a>          | <a href="#">12450</a>  | cyclin G1                      | <a href="#">Cngl</a>          | 1.117     | 1.528     | 0.169153  | 0.42056   |
| 3589      | 10431601    | <a href="#">NM_009713</a>          | <a href="#">11883</a>  | arylsulfatase A                | <a href="#">Arsa</a>          | 1.117     | 1.947     | 0.0913121 | 0.292531  |
| 3590      | 10541034    | <a href="#">NM_001081317</a>       | <a href="#">67492</a>  | AN1, ubiquitin-like, homolog ( | <a href="#">Anubl1</a>        | 1.117     | 0.783     | 0.458495  | 0.713665  |
| 3591      | 10492826    | <a href="#">NM_080428</a>          | <a href="#">50754</a>  | F-box and WD-40 domain protein | <a href="#">Fbxw7</a>         | 1.117     | 1.306     | 0.231728  | 0.502487  |
| 3592      | 10600604    | <a href="#">NM_007868</a>          | <a href="#">13405</a>  | dystrophin, muscular dystrophy | <a href="#">Dmd</a>           | 1.117     | 0.834     | 0.431178  | 0.69177   |
| 3593      | 10580349    | <a href="#">NM_175441</a>          | <a href="#">213435</a> | myosin light chain kinase 3    | <a href="#">Mylk3</a>         | 1.117     | 1.636     | 0.144654  | 0.38594   |
| 3594      | 10562419    | <a href="#">NM_001024707</a>       | <a href="#">435965</a> | low density lipoprotein recept | <a href="#">Lrp3</a>          | 1.117     | 1.556     | 0.162513  | 0.411049  |
| 3595      | 10469579    |                                    |                        |                                |                               | 1.117     | 1.056     | 0.324849  | 0.601266  |
| 3596      | 10368030    | <a href="#">NM_028440</a>          | <a href="#">73112</a>  | RIKEN cDNA 3110003A17 gene     | <a href="#">3110003A17Rik</a> | 1.117     | 1.736     | 0.124882  | 0.353808  |
| 3597      | 10549592    |                                    |                        |                                |                               | 1.117     | 0.796     | 0.451451  | 0.708527  |
| 3598      | 10544779    | <a href="#">NM_010455</a>          | <a href="#">15404</a>  | homeo box A7                   | <a href="#">Hoxa7</a>         | 1.117     | 1.75      | 0.122405  | 0.349842  |
| 3599      | 10368534    | <a href="#">NM_172495</a>          | <a href="#">211329</a> | nuclear receptor coactivator 7 | <a href="#">Ncoa7</a>         | 1.117     | 1.208     | 0.265305  | 0.540466  |
| 3600      | 10439018    | <a href="#">BC021536</a>           | <a href="#">106264</a> | RIKEN cDNA 0610012G03 gene     | <a href="#">0610012G03Rik</a> | 1.117     | 0.474     | 0.649704  | 0.842782  |
| 3601      | 10570573    | <a href="#">NM_026792</a>          | <a href="#">52123</a>  | 1-acylglycerol-3-phosphate O-a | <a href="#">Agpat5</a>        | 1.117     | 0.866     | 0.41412   | 0.677439  |
| 3602      | 10518366    | <a href="#">NM_198619</a>          | <a href="#">242747</a> | RIKEN cDNA 2810408P10 gene     | <a href="#">2810408P10Rik</a> | 1.117     | 0.947     | 0.374055  | 0.64426   |
| 3603      | 10447688    | <a href="#">AK043779</a>           | <a href="#">75060</a>  | RIKEN cDNA 4930506C21 gene     | <a href="#">4930506C21Rik</a> | 1.117     | 0.977     | 0.360224  | 0.632213  |
| 3604      | 10424221    | <a href="#">NM_001081396</a>       | <a href="#">210544</a> | WD repeat domain 67            | <a href="#">Wdr67</a>         | 1.117     | 1.842     | 0.106805  | 0.322336  |
| 3605      | 10502335    | <a href="#">NM_001033350</a>       | <a href="#">242248</a> | B-cell scaffold protein with a | <a href="#">Bank1</a>         | 1.117     | 1.442     | 0.191351  | 0.450599  |
| 3606      | 10564777    | <a href="#">BC034093</a>           | <a href="#">16576</a>  | kinesin family member 7        | <a href="#">Kif7</a>          | 1.117     | 1.992     | 0.0854721 | 0.280625  |
| 3607      | 10601011    | <a href="#">NM_008446</a>          | <a href="#">16571</a>  | kinesin family member 4        | <a href="#">Kif4</a>          | 1.117     | 1.373     | 0.210873  | 0.476393  |
| 3608      | 10425053    | <a href="#">NM_008677</a>          | <a href="#">17972</a>  | neutrophil cytosolic factor 4  | <a href="#">Ncf4</a>          | 1.117     | 2.604     | 0.0343368 | 0.157     |
| 3609      | 10483768    |                                    |                        |                                |                               | 1.117     | 1.399     | 0.203183  | 0.466005  |
| 3610      | 10478401    | <a href="#">NM_029512</a>          | <a href="#">76080</a>  | RIKEN cDNA 5830472M02 gene     | <a href="#">5830472M02Rik</a> | 1.116     | 0.737     | 0.484638  | 0.733146  |
| 3611      | 10549341    | <a href="#">NM_138757</a>          | <a href="#">71177</a>  | RIKEN cDNA 4933424B01 gene     | <a href="#">4933424B01Rik</a> | 1.116     | 1.55      | 0.163872  | 0.413228  |
| 3612      | 10404301    | <a href="#">NM_025896</a>          | <a href="#">67000</a>  | prolactin family 3, subfamily  | <a href="#">Prl3a1</a>        | 1.116     | 1.238     | 0.254573  | 0.528857  |
| 3613      | 10483797    | <a href="#">ENSMUST00000064205</a> | <a href="#">73429</a>  | RIKEN cDNA 1700109F18 gene     | <a href="#">1700109F18Rik</a> | 1.116     | 1.246     | 0.251753  | 0.525631  |
| 3614      | 10367440    | <a href="#">NM_008398</a>          | <a href="#">16404</a>  | integrin alpha 7               | <a href="#">Itga7</a>         | 1.116     | 1.908     | 0.0968203 | 0.303049  |
| 3615      | 10548367    | <a href="#">NM_175526</a>          | <a href="#">243653</a> | C-type lectin domain family 1, | <a href="#">Clec1a</a>        | 1.116     | 2.088     | 0.0740571 | 0.257223  |
| 3616      | 10454809    | <a href="#">NM_010771</a>          | <a href="#">17184</a>  | matrin 3                       | <a href="#">Matr3</a>         | 1.116     | 2.51      | 0.0394499 | 0.172341  |
| 3617      | 10494369    | <a href="#">NM_153053</a>          | <a href="#">107701</a> | splicing factor 3b, subunit 4  | <a href="#">Sf3b4</a>         | 1.116     | 0.663     | 0.527913  | 0.763369  |
| 3618      | 10424731    | <a href="#">NM_026960</a>          | <a href="#">69146</a>  | gasdermin D                    | <a href="#">Gsdmd</a>         | 1.116     | 2.351     | 0.0499333 | 0.20095   |
| 3619      | 10374773    |                                    |                        |                                |                               | 1.116     | 1.36      | 0.214856  | 0.481846  |
| 3620      | 10424555    |                                    |                        |                                |                               | 1.116     | 0.758     | 0.472753  | 0.724458  |
| 3621      | 10527441    | <a href="#">NM_023142</a>          | <a href="#">11867</a>  | actin related protein 2/3 comp | <a href="#">Arpc1b</a>        | 1.116     | 1.355     | 0.216427  | 0.483657  |
| 3622      | 10449236    | <a href="#">NM_019731</a>          | <a href="#">56520</a>  | non-metastatic cells 4, protei | <a href="#">Nme4</a>          | 1.116     | 0.805     | 0.446306  | 0.704033  |
| 3623      | 10360563    | <a href="#">NM_027188</a>          | <a href="#">69726</a>  | SET and MYND domain containing | <a href="#">Smyd3</a>         | 1.116     | 0.549     | 0.599696  | 0.812038  |
| 3624      | 10505779    | <a href="#">NM_139306</a>          | <a href="#">230379</a> | N-acylsphingosine amidohydrola | <a href="#">Asah3l</a>        | 1.116     | 1.79      | 0.115301  | 0.337519  |
| 3625      | 10471978    | <a href="#">NM_172663</a>          | <a href="#">227867</a> | enhancer of polycomb homolog 2 | <a href="#">Epc2</a>          | 1.116     | 1.351     | 0.217523  | 0.485293  |
| 3626      | 10411782    | <a href="#">NM_001077495</a>       | <a href="#">18708</a>  | phosphatidylinositol 3-kinase, | <a href="#">Pik3r1</a>        | 1.116     | 1.356     | 0.215879  | 0.482969  |
| 3627      | 10425923    | <a href="#">BC066174</a>           | <a href="#">73225</a>  | RIKEN cDNA 3110048E14 gene     | <a href="#">3110048E14Rik</a> | 1.116     | 1.575     | 0.158039  | 0.405065  |
| 3628      | 10576899    |                                    |                        |                                |                               | 1.116     | 1.104     | 0.305029  | 0.581459  |
| 3629      | 10460947    | <a href="#">NM_011224</a>          | <a href="#">19309</a>  | muscle glycogen phosphorylase  | <a href="#">Pygm</a>          | 1.116     | 1.29      | 0.23673   | 0.508837  |
| 3630      | 10585545    | <a href="#">NM_011992</a>          | <a href="#">26611</a>  | reticulocalbin 2               | <a href="#">Rcn2</a>          | 1.116     | 1.697     | 0.132201  | 0.365389  |

|      |          |                                    |                           |                                    |                                    |       |       |           |          |
|------|----------|------------------------------------|---------------------------|------------------------------------|------------------------------------|-------|-------|-----------|----------|
| 3631 | 10562568 | <a href="#">BC060235</a>           | <a href="#">235103</a>    | RIKEN cDNA 4931406P16 gene         | <a href="#">4931406P16Rik</a>      | 1.116 | 1.205 | 0.266226  | 0.541185 |
| 3632 | 10590918 | <a href="#">NM_001081395</a>       | <a href="#">75723</a>     | angiominin-like 1                  | <a href="#">Amotl1</a>             | 1.116 | 1.745 | 0.123268  | 0.351406 |
| 3633 | 10503882 | <a href="#">NM_011884</a>          | <a href="#">24018</a>     | RNA guanylyltransferase and 5'     | <a href="#">Rngtt</a>              | 1.116 | 0.963 | 0.366876  | 0.637877 |
| 3634 | 10364650 | <a href="#">NM_027521</a>          | <a href="#">70719</a>     | histocompatibility (minor) HA-     | <a href="#">Hmha1</a>              | 1.116 | 1.846 | 0.106139  | 0.32138  |
| 3635 | 10516666 | <a href="#">NM_001005506</a>       | <a href="#">109658</a>    | taxilin alpha                      | <a href="#">Txlna</a>              | 1.116 | 1.782 | 0.116675  | 0.340086 |
| 3636 | 10424796 | <a href="#">AK005822</a>           | <a href="#">100041269</a> | predicted gene,<br>ENSMUSG00000007 | <a href="#">ENSMUSG00000071724</a> | 1.116 | 1.679 | 0.135704  | 0.371434 |
| 3637 | 10423505 | <a href="#">NM_181588</a>          | <a href="#">69574</a>     | carboxymethylenebutenolidase-I     | <a href="#">Cmbl</a>               | 1.116 | 1.028 | 0.337182  | 0.612796 |
| 3638 | 10492195 | <a href="#">NM_001081229</a>       | <a href="#">72033</a>     | TSC22 domain family 2              | <a href="#">Tsc22d2</a>            | 1.116 | 2.133 | 0.0692101 | 0.246526 |
| 3639 | 10493498 |                                    |                           |                                    |                                    | 1.116 | 2.427 | 0.0445906 | 0.186809 |
| 3640 | 10383313 | <a href="#">NM_198423</a>          | <a href="#">268515</a>    | BAH domain and coiled-coil con     | <a href="#">Bahce1</a>             | 1.116 | 2.174 | 0.0650861 | 0.23797  |
| 3641 | 10479411 | <a href="#">NM_031373</a>          | <a href="#">72075</a>     | opioid growth factor receptor      | <a href="#">Ogfr</a>               | 1.116 | 1.098 | 0.307623  | 0.584192 |
| 3642 | 10376577 |                                    |                           |                                    |                                    | 1.116 | 0.683 | 0.515994  | 0.755582 |
| 3643 | 10455782 |                                    |                           |                                    |                                    | 1.116 | 1.04  | 0.331776  | 0.608173 |
| 3644 | 10391914 | <a href="#">NM_183288</a>          | <a href="#">70559</a>     | RIKEN cDNA 5730442P18 gene         | <a href="#">5730442P18Rik</a>      | 1.116 | 1.927 | 0.0941677 | 0.297861 |
| 3645 | 10382200 | <a href="#">NM_029606</a>          | <a href="#">76380</a>     | coiled-coil domain-containing      | <a href="#">Cede46</a>             | 1.115 | 1.2   | 0.268236  | 0.542786 |
| 3646 | 10574139 |                                    |                           |                                    |                                    | 1.115 | 1.5   | 0.175944  | 0.429653 |
| 3647 | 10353899 | <a href="#">NM_001126047</a>       | <a href="#">20353</a>     | sema domain, immunoglobulin do     | <a href="#">Sema4c</a>             | 1.115 | 1.707 | 0.130246  | 0.362012 |
| 3648 | 10441115 | <a href="#">NM_145125</a>          | <a href="#">93871</a>     | bromodomain and WD repeat doma     | <a href="#">Brwd1</a>              | 1.115 | 1.744 | 0.123336  | 0.351451 |
| 3649 | 10430433 | <a href="#">AK131739</a>           | <a href="#">69996</a>     | RIKEN cDNA 1700027A07 gene         | <a href="#">1700027A07Rik</a>      | 1.115 | 1.054 | 0.325704  | 0.601982 |
| 3650 | 10529515 | <a href="#">NM_030889</a>          | <a href="#">81840</a>     | sortilin-related VPS10 domain      | <a href="#">Sorcs2</a>             | 1.115 | 0.978 | 0.359563  | 0.63155  |
| 3651 | 10408898 |                                    |                           |                                    |                                    | 1.115 | 1.572 | 0.158699  | 0.405501 |
| 3652 | 10394477 | <a href="#">NM_008640</a>          | <a href="#">17775</a>     | lysosomal-associated protein t     | <a href="#">Laptm4a</a>            | 1.115 | 2.324 | 0.0520032 | 0.206218 |
| 3653 | 10465844 | <a href="#">NM_025610</a>          | <a href="#">66514</a>     | asparaginase like 1                | <a href="#">Asrgl1</a>             | 1.115 | 1.202 | 0.267462  | 0.542206 |
| 3654 | 10410465 | <a href="#">BC026613</a>           | <a href="#">218333</a>    | cDNA sequence BC018507             | <a href="#">BC018507</a>           | 1.115 | 1.912 | 0.0962968 | 0.302072 |
| 3655 | 10576829 | <a href="#">NM_130903</a>          | <a href="#">170776</a>    | CD209c antigen                     | <a href="#">Cd209c</a>             | 1.115 | 0.747 | 0.478984  | 0.729132 |
| 3656 | 10451860 | <a href="#">NM_028370</a>          | <a href="#">72836</a>     | protection of telomeres 1B         | <a href="#">Pot1b</a>              | 1.115 | 1.319 | 0.227571  | 0.49837  |
| 3657 | 10395129 | <a href="#">NM_172049</a>          | <a href="#">211986</a>    | transmembrane protein 18           | <a href="#">Tmem18</a>             | 1.115 | 1.445 | 0.190549  | 0.449454 |
| 3658 | 10345715 | <a href="#">NM_008696</a>          | <a href="#">26921</a>     | mitogen-activated protein kina     | <a href="#">Map4k4</a>             | 1.115 | 2.129 | 0.0695739 | 0.247236 |
| 3659 | 10515731 | <a href="#">ENSMUST00000075406</a> | <a href="#">230676</a>    | cDNA sequence BC059842             | <a href="#">BC059842</a>           | 1.115 | 0.781 | 0.459705  | 0.714602 |
| 3660 | 10527229 | <a href="#">NM_026050</a>          | <a href="#">67238</a>     | RIKEN cDNA 2810453106 gene         | <a href="#">2810453106Rik</a>      | 1.115 | 0.901 | 0.396459  | 0.663863 |
| 3661 | 10503570 | <a href="#">ENSMUST00000098238</a> | <a href="#">66625</a>     | splicing factor, arginine/seri     | <a href="#">Sfrs18</a>             | 1.114 | 2.063 | 0.076849  | 0.262843 |
| 3662 | 10531166 | <a href="#">NM_001081401</a>       | <a href="#">330119</a>    | a disintegrin-like and metallo     | <a href="#">Adams3</a>             | 1.114 | 1.25  | 0.250298  | 0.524354 |
| 3663 | 10547943 | <a href="#">NM_146171</a>          | <a href="#">68298</a>     | non-SMC condensin I complex, s     | <a href="#">Ncapd2</a>             | 1.114 | 0.773 | 0.464245  | 0.718069 |
| 3664 | 10450872 | <a href="#">NM_146515</a>          | <a href="#">258508</a>    | olfactory receptor 99              | <a href="#">Olfr99</a>             | 1.114 | 0.862 | 0.416376  | 0.67936  |
| 3665 | 10541910 | <a href="#">NM_011708</a>          | <a href="#">22371</a>     | Von Willebrand factor homolog      | <a href="#">Vwf</a>                | 1.114 | 1.935 | 0.0930415 | 0.295652 |
| 3666 | 10427214 | <a href="#">NM_013672</a>          | <a href="#">20683</a>     | trans-acting transcription fac     | <a href="#">Sp1</a>                | 1.114 | 1.142 | 0.290082  | 0.566261 |
| 3667 | 10362767 | <a href="#">NM_138315</a>          | <a href="#">171580</a>    | microtubule associated monoxyg     | <a href="#">Mical1</a>             | 1.114 | 1.741 | 0.123996  | 0.352437 |
| 3668 | 10420668 |                                    |                           |                                    |                                    | 1.114 | 1.056 | 0.324978  | 0.601325 |
| 3669 | 10412699 |                                    |                           |                                    |                                    | 1.114 | 1.825 | 0.109572  | 0.327185 |
| 3670 | 10360105 | <a href="#">NM_013919</a>          | <a href="#">30941</a>     | ubiquitin specific peptidase 2     | <a href="#">Usp21</a>              | 1.114 | 0.843 | 0.426433  | 0.687967 |
| 3671 | 10540935 | <a href="#">NM_025958</a>          | <a href="#">67088</a>     | cullin-associated and neddylat     | <a href="#">Cand2</a>              | 1.114 | 1.762 | 0.120263  | 0.346577 |
| 3672 | 10515429 |                                    |                           |                                    |                                    | 1.114 | 1.563 | 0.160848  | 0.408621 |
| 3673 | 10588755 | <a href="#">NM_145621</a>          | <a href="#">235604</a>    | CaM kinase-like vesicle-associ     | <a href="#">Camkv</a>              | 1.114 | 0.921 | 0.386599  | 0.655658 |
| 3674 | 10578320 | <a href="#">XR_030685</a>          | <a href="#">667019</a>    | similar to High mobility group     | <a href="#">LOC667019</a>          | 1.114 | 2.356 | 0.0496218 | 0.200156 |
| 3675 | 10427461 | <a href="#">NM_008965</a>          | <a href="#">19219</a>     | prostaglandin E receptor 4 (su     | <a href="#">Ptger4</a>             | 1.114 | 1.51  | 0.173667  | 0.426449 |
| 3676 | 10395324 | <a href="#">NM_029294</a>          | <a href="#">75456</a>     | phosphoribosyl pyrophosphate s     | <a href="#">Prps11l</a>            | 1.114 | 1.117 | 0.299651  | 0.575741 |
| 3677 | 10554895 | <a href="#">NM_145151</a>          | <a href="#">233490</a>    | CREB/ATF bZIP transcription fa     | <a href="#">Crebzf</a>             | 1.114 | 1.938 | 0.0925851 | 0.294729 |
| 3678 | 10583163 | <a href="#">NM_013838</a>          | <a href="#">22068</a>     | transient receptor potential c     | <a href="#">Trpc6</a>              | 1.114 | 1.386 | 0.206996  | 0.471406 |
| 3679 | 10459703 |                                    |                           |                                    |                                    | 1.113 | 2.288 | 0.0549093 | 0.213655 |
| 3680 | 10495657 | <a href="#">ENSMUST00000093985</a> | <a href="#">66789</a>     | asparagine-linked glycosylatio     | <a href="#">Alg14</a>              | 1.113 | 1.443 | 0.190984  | 0.450035 |
| 3681 | 10373054 | <a href="#">BC089587</a>           | <a href="#">216441</a>    | solute carrier family 26, memb     | <a href="#">Slc26a10</a>           | 1.113 | 1.907 | 0.0969864 | 0.30331  |
| 3682 | 10374413 |                                    |                           |                                    |                                    | 1.113 | 1.96  | 0.0896593 | 0.289031 |
| 3683 | 10486166 | <a href="#">NM_199310</a>          | <a href="#">269336</a>    | coiled-coil domain containing      | <a href="#">Ccde32</a>             | 1.113 | 1.514 | 0.172671  | 0.425024 |
| 3684 | 10560709 | <a href="#">NM_027514</a>          | <a href="#">52118</a>     | poliovirus receptor                | <a href="#">Pvr</a>                | 1.113 | 0.915 | 0.389953  | 0.658612 |

|      |          |                                    |                        |                                |                               |       |       |           |          |
|------|----------|------------------------------------|------------------------|--------------------------------|-------------------------------|-------|-------|-----------|----------|
| 3685 | 10416169 | <a href="#">NM_008145</a>          | <a href="#">14714</a>  | gonadotropin releasing hormone | <a href="#">Gnrh1</a>         | 1.113 | 1.528 | 0.169007  | 0.420416 |
| 3686 | 10542965 | <a href="#">NM_011360</a>          | <a href="#">20392</a>  | sarcoglycan, epsilon           | <a href="#">Sgce</a>          | 1.113 | 1.457 | 0.18728   | 0.445668 |
| 3687 | 10487577 | <a href="#">NM_181589</a>          | <a href="#">70466</a>  | cytoskeleton associated protei | <a href="#">Ckap2l</a>        | 1.113 | 1.427 | 0.195481  | 0.455756 |
| 3688 | 10590467 | <a href="#">BC080690</a>           | <a href="#">382117</a> | DNA segment, Chr 9, ERATO Doi  | <a href="#">D9Ert402e</a>     | 1.113 | 1.612 | 0.149755  | 0.392417 |
| 3689 | 10533849 | <a href="#">NM_021430</a>          | <a href="#">75695</a>  | Rab interacting lysosomal prot | <a href="#">Rilpl1</a>        | 1.113 | 2.171 | 0.0653447 | 0.238462 |
| 3690 | 10552932 | <a href="#">NM_010596</a>          | <a href="#">16495</a>  | potassium voltage-gated channe | <a href="#">Kena7</a>         | 1.113 | 1.918 | 0.0953376 | 0.300062 |
| 3691 | 10410264 | <a href="#">NM_025547</a>          | <a href="#">66410</a>  | MTERF domain containing 1      | <a href="#">Mterfd1</a>       | 1.113 | 1.299 | 0.233894  | 0.505206 |
| 3692 | 10584013 |                                    |                        |                                |                               | 1.113 | 2.072 | 0.0757672 | 0.260364 |
| 3693 | 10464659 | <a href="#">NM_011237</a>          | <a href="#">19367</a>  | RAD9 homolog (S. pombe)        | <a href="#">Rad9</a>          | 1.113 | 1.201 | 0.267711  | 0.542452 |
| 3694 | 10469811 | <a href="#">NM_153077</a>          | <a href="#">215274</a> | interleukin 1 family, member 1 | <a href="#">Il1f10</a>        | 1.112 | 1.988 | 0.0859164 | 0.281297 |
| 3695 | 10524331 | <a href="#">BC094571</a>           | <a href="#">330164</a> | RIKEN cDNA C130026L21 gene     | <a href="#">C130026L21Rik</a> | 1.112 | 1.298 | 0.234232  | 0.505464 |
| 3696 | 10458098 | <a href="#">BC031465</a>           | <a href="#">225358</a> | RIKEN cDNA 2610024E20 gene     | <a href="#">2610024E20Rik</a> | 1.112 | 1.523 | 0.170243  | 0.421869 |
| 3697 | 10404941 | <a href="#">NM_172262</a>          | <a href="#">218214</a> | amine oxidase, flavin containi | <a href="#">Aof1</a>          | 1.112 | 1.598 | 0.152884  | 0.396925 |
| 3698 | 10465910 |                                    |                        |                                |                               | 1.112 | 1.437 | 0.192578  | 0.452078 |
| 3699 | 10372928 | <a href="#">NM_153395</a>          | <a href="#">67074</a>  | MON2 homolog (yeast)           | <a href="#">Mon2</a>          | 1.112 | 1.551 | 0.163611  | 0.412815 |
| 3700 | 10595298 | <a href="#">NM_001081243</a>       | <a href="#">70598</a>  | filamin A interacting protein  | <a href="#">Filip1</a>        | 1.112 | 0.872 | 0.411329  | 0.675346 |
| 3701 | 10482695 | <a href="#">NM_001037099</a>       | <a href="#">12298</a>  | calcium channel, voltage-depen | <a href="#">Cacnb4</a>        | 1.112 | 1.077 | 0.316254  | 0.593179 |
| 3702 | 10376033 | <a href="#">NM_008443</a>          | <a href="#">16568</a>  | kinesin family member 3A       | <a href="#">Kif3a</a>         | 1.112 | 1.559 | 0.161794  | 0.410091 |
| 3703 | 10478590 | <a href="#">NM_028028</a>          | <a href="#">71971</a>  | zinc finger, SWIM domain conta | <a href="#">Zswim1</a>        | 1.112 | 0.976 | 0.360768  | 0.632458 |
| 3704 | 10586166 |                                    |                        |                                |                               | 1.112 | 0.446 | 0.668754  | 0.852586 |
| 3705 | 10380819 | <a href="#">ENSMUST00000060568</a> | <a href="#">72785</a>  | RIKEN cDNA 2810474C18 gene     | <a href="#">2810474C18Rik</a> | 1.112 | 1.565 | 0.160249  | 0.407591 |
| 3706 | 10557862 | <a href="#">NM_001082960</a>       | <a href="#">16409</a>  | integrin alpha M               | <a href="#">Itgam</a>         | 1.112 | 1.942 | 0.092043  | 0.293984 |
| 3707 | 10425755 |                                    |                        |                                |                               | 1.112 | 1.238 | 0.254533  | 0.528824 |
| 3708 | 10470584 | <a href="#">NM_022887</a>          | <a href="#">64930</a>  | tuberous sclerosis 1           | <a href="#">Tsc1</a>          | 1.112 | 1.18  | 0.27533   | 0.550191 |
| 3709 | 10607486 | <a href="#">NM_001093750</a>       | <a href="#">211612</a> | patched domain containing 1    | <a href="#">Ptchd1</a>        | 1.112 | 0.44  | 0.672898  | 0.854651 |
| 3710 | 10413492 | <a href="#">NM_176920</a>          | <a href="#">319476</a> | leucine-rich repeats and trans | <a href="#">Lrtm1</a>         | 1.112 | 1.316 | 0.228444  | 0.499454 |
| 3711 | 10460461 | <a href="#">NM_025717</a>          | <a href="#">66704</a>  | RNA binding motif protein 4B   | <a href="#">Rbm4b</a>         | 1.112 | 1.263 | 0.245844  | 0.51897  |
| 3712 | 10550847 | <a href="#">NM_019941</a>          | <a href="#">56525</a>  | zinc finger protein 235        | <a href="#">Zfp235</a>        | 1.112 | 1.454 | 0.187992  | 0.446224 |
| 3713 | 10413695 | <a href="#">NM_001081251</a>       | <a href="#">66923</a>  | polybromo 1                    | <a href="#">Pbrm1</a>         | 1.112 | 1.342 | 0.220305  | 0.488992 |
| 3714 | 10377010 | <a href="#">NM_001040026</a>       | <a href="#">52892</a>  | SCO cytochrome oxidase deficie | <a href="#">Scol</a>          | 1.112 | 0.943 | 0.376129  | 0.646208 |
| 3715 | 10509584 | <a href="#">NM_001082531</a>       | <a href="#">18780</a>  | phospholipase A2, group IIA (p | <a href="#">Pla2g2a</a>       | 1.112 | 1.336 | 0.222265  | 0.492042 |
| 3716 | 10560242 | <a href="#">NM_007577</a>          | <a href="#">12273</a>  | complement component 5a        | <a href="#">C5ar1</a>         | 1.112 | 1.544 | 0.16534   | 0.415485 |
| 3717 | 10586448 | <a href="#">NM_026515</a>          | <a href="#">68026</a>  | RIKEN cDNA 2810417H13 gene     | <a href="#">2810417H13Rik</a> | 1.112 | 0.676 | 0.520065  | 0.757683 |
| 3718 | 10573893 | <a href="#">NM_011936</a>          | <a href="#">26383</a>  | fat mass and obesity associate | <a href="#">Fto</a>           | 1.112 | 1.673 | 0.136978  | 0.373595 |
| 3719 | 10420080 | <a href="#">NM_023397</a>          | <a href="#">67881</a>  | RIKEN cDNA 1810034K20 gene     | <a href="#">1810034K20Rik</a> | 1.111 | 1.307 | 0.231444  | 0.502324 |
| 3720 | 10436967 | <a href="#">NM_007620</a>          | <a href="#">12408</a>  | carbonyl reductase 1           | <a href="#">Cbr1</a>          | 1.111 | 1.044 | 0.330322  | 0.606542 |
| 3721 | 10478364 | <a href="#">NM_001098799</a>       | <a href="#">269389</a> | TOX high mobility group box fa | <a href="#">Tox2</a>          | 1.111 | 1.597 | 0.15296   | 0.396978 |
| 3722 | 10547613 | <a href="#">NM_027664</a>          | <a href="#">108653</a> | RIKEN cDNA 4933426K21 gene     | <a href="#">4933426K21Rik</a> | 1.111 | 0.657 | 0.531282  | 0.765579 |
| 3723 | 10381603 | <a href="#">NM_020510</a>          | <a href="#">57265</a>  | frizzled homolog 2 (Drosophila | <a href="#">Fzd2</a>          | 1.111 | 1.232 | 0.256459  | 0.530714 |
| 3724 | 10601044 | <a href="#">NM_023608</a>          | <a href="#">71584</a>  | glycerophosphodiester phosphod | <a href="#">Gdpd2</a>         | 1.111 | 1.697 | 0.132201  | 0.365389 |
| 3725 | 10363445 | <a href="#">NM_028732</a>          | <a href="#">74048</a>  | RIKEN cDNA 4632428N05 gene     | <a href="#">4632428N05Rik</a> | 1.111 | 2.152 | 0.067235  | 0.242225 |
| 3726 | 10541762 | <a href="#">NM_175557</a>          | <a href="#">269800</a> | zinc finger protein 384        | <a href="#">Zfp384</a>        | 1.111 | 1.481 | 0.18095   | 0.436858 |
| 3727 | 10398824 | <a href="#">BC096642</a>           | <a href="#">319942</a> | RIKEN cDNA A530016L24 gene     | <a href="#">A530016L24Rik</a> | 1.111 | 2.595 | 0.0347987 | 0.158375 |
| 3728 | 10553835 | <a href="#">BC054763</a>           | <a href="#">27385</a>  | melanoma antigen, family L, 2  | <a href="#">Magel2</a>        | 1.111 | 1.471 | 0.18357   | 0.440767 |
| 3729 | 10410975 | <a href="#">NM_145453</a>          | <a href="#">69085</a>  | zinc finger, CCHC domain conta | <a href="#">Zcchc9</a>        | 1.111 | 1.526 | 0.169519  | 0.420889 |
| 3730 | 10362520 | <a href="#">NM_008229</a>          | <a href="#">15182</a>  | histone deacetylase 2          | <a href="#">Hdac2</a>         | 1.111 | 2.138 | 0.0686912 | 0.245297 |
| 3731 | 10545588 | <a href="#">NM_013820</a>          | <a href="#">15277</a>  | hexokinase 2                   | <a href="#">Hk2</a>           | 1.111 | 1.348 | 0.218595  | 0.486779 |
| 3732 | 10590298 | <a href="#">NM_026892</a>          | <a href="#">68969</a>  | eukaryotic translation initiat | <a href="#">Eif1b</a>         | 1.111 | 1.387 | 0.206879  | 0.471397 |
| 3733 | 10352178 | <a href="#">NM_178653</a>          | <a href="#">109232</a> | saccharopine dehydrogenase (pu | <a href="#">Sccpdh</a>        | 1.111 | 0.999 | 0.350203  | 0.623711 |
| 3734 | 10432176 |                                    |                        |                                |                               | 1.111 | 0.348 | 0.737962  | 0.888273 |

|      |          |                                    |                        |                                 |                                    |       |       |           |          |
|------|----------|------------------------------------|------------------------|---------------------------------|------------------------------------|-------|-------|-----------|----------|
| 3735 | 10356657 | <a href="#">NM_024197</a>          | <a href="#">67273</a>  | NADH dehydrogenase (ubiquinone) | <a href="#">Ndufa10</a>            | 1.111 | 1.53  | 0.168514  | 0.419875 |
| 3736 | 10566922 | <a href="#">ENSMUST00000098108</a> | <a href="#">619306</a> | RIKEN cDNA B430319F04 gene      | <a href="#">B430319F04Rik</a>      | 1.111 | 1.106 | 0.30409   | 0.580401 |
| 3737 | 10508128 | <a href="#">BC029204</a>           | <a href="#">230752</a> | RIKEN cDNA 2610027C15 gene      | <a href="#">2610027C15Rik</a>      | 1.111 | 1.899 | 0.0980976 | 0.30552  |
| 3738 | 10469965 | <a href="#">NM_175300</a>          | <a href="#">99152</a>  | anaphase promoting complex sub  | <a href="#">Anapc2</a>             | 1.111 | 1.272 | 0.24296   | 0.51587  |
| 3739 | 10553319 | <a href="#">ENSMUST00000070660</a> | <a href="#">629141</a> | predicted gene, ENSMUSG0000005  | <a href="#">ENSMUSG00000056509</a> | 1.111 | 1.306 | 0.231743  | 0.502487 |
| 3740 | 10438245 | <a href="#">NM_022408</a>          | <a href="#">27886</a>  | expressed sequence 2 embryonic  | <a href="#">Es2el</a>              | 1.111 | 1.44  | 0.191906  | 0.451201 |
| 3741 | 10365769 | <a href="#">NM_010401</a>          | <a href="#">15109</a>  | histidine ammonia lyase         | <a href="#">Hal</a>                | 1.111 | 1.424 | 0.1963    | 0.45671  |
| 3742 | 10510061 | <a href="#">BC056931</a>           | <a href="#">242736</a> | RIKEN cDNA 4732496O08 gene      | <a href="#">4732496O08Rik</a>      | 1.111 | 0.563 | 0.590522  | 0.806276 |
| 3743 | 10469695 | <a href="#">NM_019456</a>          | <a href="#">54519</a>  | amyloid beta (A4) precursor pr  | <a href="#">Apbb1ip</a>            | 1.111 | 1.074 | 0.317468  | 0.594727 |
| 3744 | 10409804 | <a href="#">NM_153538</a>          | <a href="#">214290</a> | zinc finger, CCHC domain conta  | <a href="#">Zcchc6</a>             | 1.11  | 1.374 | 0.210707  | 0.476211 |
| 3745 | 10384766 |                                    |                        |                                 |                                    | 1.11  | 1.65  | 0.141632  | 0.381146 |
| 3746 | 10455959 |                                    |                        |                                 |                                    | 1.11  | 2.068 | 0.076292  | 0.261682 |
| 3747 | 10600403 | <a href="#">NM_138607</a>          | <a href="#">108160</a> | DNA segment, human DXS9928E     | <a href="#">D0HXS9928E</a>         | 1.11  | 1.205 | 0.266096  | 0.541183 |
| 3748 | 10453830 | <a href="#">NM_144860</a>          | <a href="#">225164</a> | mindbomb homolog 1 (Drosophila) | <a href="#">Mib1</a>               | 1.11  | 1.813 | 0.111536  | 0.330459 |
| 3749 | 10514713 | <a href="#">NM_146254</a>          | <a href="#">242584</a> | WD repeat domain 78             | <a href="#">Wdr78</a>              | 1.11  | 1.811 | 0.111847  | 0.331046 |
| 3750 | 10445033 | <a href="#">NM_001025599</a>       | <a href="#">22670</a>  | tripartite motif-containing 26  | <a href="#">Trim26</a>             | 1.11  | 1.932 | 0.0934104 | 0.296335 |
| 3751 | 10550326 | <a href="#">NM_198613</a>          | <a href="#">232910</a> | adaptor-related protein comple  | <a href="#">Ap2s1</a>              | 1.11  | 1.603 | 0.151764  | 0.395645 |
| 3752 | 10574451 | <a href="#">ENSMUST00000093245</a> | <a href="#">65115</a>  | brain expressed, associated wi  | <a href="#">Bean</a>               | 1.11  | 1.587 | 0.155322  | 0.400794 |
| 3753 | 10361250 | <a href="#">NM_144817</a>          | <a href="#">215303</a> | calcium/calmodulin-dependent p  | <a href="#">Camk1g</a>             | 1.11  | 1.644 | 0.142835  | 0.382955 |
| 3754 | 10390336 | <a href="#">NM_198100</a>          | <a href="#">73174</a>  | TBK1 binding protein 1          | <a href="#">Tbkbp1</a>             | 1.11  | 2.199 | 0.062697  | 0.2318   |
| 3755 | 10357630 | <a href="#">NM_001081011</a>       | <a href="#">14270</a>  | SLIT-ROBO Rho GTPase activatin  | <a href="#">Srgap2</a>             | 1.11  | 1.271 | 0.243292  | 0.516291 |
| 3756 | 10419874 | <a href="#">NM_021551</a>          | <a href="#">59049</a>  | solute carrier family 22 (orga  | <a href="#">Slc22a17</a>           | 1.11  | 1.626 | 0.146773  | 0.388752 |
| 3757 | 10488926 | <a href="#">ENSMUST00000099160</a> | <a href="#">613262</a> | cDNA sequence BC029722          | <a href="#">BC029722</a>           | 1.11  | 1.708 | 0.130113  | 0.36185  |
| 3758 | 10544501 | <a href="#">NM_007971</a>          | <a href="#">14056</a>  | enhancer of zeste homolog 2 (D  | <a href="#">Ezh2</a>               | 1.11  | 2.102 | 0.0725345 | 0.253709 |
| 3759 | 10563872 | <a href="#">NM_176942</a>          | <a href="#">110886</a> | gamma-aminobutyric acid (GABA-  | <a href="#">Gabra5</a>             | 1.11  | 1.436 | 0.193025  | 0.452475 |
| 3760 | 10494832 | <a href="#">NM_025679</a>          | <a href="#">66641</a>  | RIKEN cDNA 5730470L24 gene      | <a href="#">5730470L24Rik</a>      | 1.11  | 1.238 | 0.254347  | 0.528633 |
| 3761 | 10598389 | <a href="#">NM_172372</a>          | <a href="#">54636</a>  | WD repeat domain 45             | <a href="#">Wdr45</a>              | 1.11  | 2.083 | 0.0745347 | 0.258241 |
| 3762 | 10548128 | <a href="#">NM_175414</a>          | <a href="#">109246</a> | tetraspanin 9                   | <a href="#">Tspan9</a>             | 1.11  | 1.459 | 0.186694  | 0.444956 |
| 3763 | 10394381 | <a href="#">NM_001099628</a>       | <a href="#">320817</a> | ATPase family, AAA domain cont  | <a href="#">Atad2b</a>             | 1.109 | 1.433 | 0.193624  | 0.453103 |
| 3764 | 10424331 | <a href="#">NM_026642</a>          | <a href="#">68260</a>  | tRNA methyltransferase 12 homol | <a href="#">Trmt12</a>             | 1.109 | 0.892 | 0.401398  | 0.666762 |
| 3765 | 10503359 | <a href="#">NM_198957</a>          | <a href="#">77604</a>  | RIKEN cDNA C430048L16 gene      | <a href="#">C430048L16Rik</a>      | 1.109 | 1.913 | 0.0960544 | 0.301621 |
| 3766 | 10515712 | <a href="#">ENSMUST00000075406</a> | <a href="#">230676</a> | cDNA sequence BC059842          | <a href="#">BC059842</a>           | 1.109 | 1.164 | 0.28161   | 0.556928 |
| 3767 | 10522090 | <a href="#">NM_153391</a>          | <a href="#">213081</a> | WD repeat domain 19             | <a href="#">Wdr19</a>              | 1.109 | 0.765 | 0.468336  | 0.720616 |
| 3768 | 10577315 | <a href="#">NM_007426</a>          | <a href="#">11601</a>  | angiopoietin 2                  | <a href="#">Angpt2</a>             | 1.109 | 1.59  | 0.154618  | 0.399809 |
| 3769 | 10596492 | <a href="#">NM_145619</a>          | <a href="#">235587</a> | poly (ADP-ribose) polymerase f  | <a href="#">Parp3</a>              | 1.109 | 2.257 | 0.0574807 | 0.219583 |
| 3770 | 10427796 | <a href="#">NM_008728</a>          | <a href="#">18162</a>  | natriuretic peptide receptor 3  | <a href="#">Npr3</a>               | 1.109 | 0.443 | 0.670867  | 0.85389  |
| 3771 | 10491595 |                                    |                        |                                 |                                    | 1.109 | 0.771 | 0.465228  | 0.718906 |
| 3772 | 10381082 | <a href="#">NM_009024</a>          | <a href="#">19401</a>  | retinoic acid receptor, alpha   | <a href="#">Rara</a>               | 1.109 | 1.57  | 0.159225  | 0.406366 |
| 3773 | 10397364 | <a href="#">NM_145447</a>          | <a href="#">217721</a> | feline leukemia virus subgroup  | <a href="#">Flvcr2</a>             | 1.109 | 2.216 | 0.0610995 | 0.228128 |
| 3774 | 10453918 | <a href="#">NM_029623</a>          | <a href="#">76482</a>  | RIKEN cDNA 3110002H16 gene      | <a href="#">3110002H16Rik</a>      | 1.109 | 0.893 | 0.400592  | 0.666392 |
| 3775 | 10487447 | <a href="#">NM_145532</a>          | <a href="#">228576</a> | mal, T-cell differentiation pr  | <a href="#">Mall</a>               | 1.109 | 2.221 | 0.0606869 | 0.227229 |
| 3776 | 10416655 | <a href="#">NM_001034882</a>       | <a href="#">432879</a> | predicted gene, EG432879        | <a href="#">EG432879</a>           | 1.109 | 1.486 | 0.179656  | 0.434993 |
| 3777 | 10498403 |                                    |                        |                                 |                                    | 1.109 | 2.386 | 0.0474308 | 0.193793 |
| 3778 | 10428877 | <a href="#">BC067035</a>           | <a href="#">223593</a> | RIKEN cDNA E430025E21 gene      | <a href="#">E430025E21Rik</a>      | 1.109 | 0.973 | 0.362202  | 0.633711 |
| 3779 | 10588903 | <a href="#">NM_011678</a>          | <a href="#">22258</a>  | ubiquitin specific peptidase 4  | <a href="#">Usp4</a>               | 1.109 | 1.292 | 0.236334  | 0.508399 |
| 3780 | 10520696 | <a href="#">ENSMUST00000066505</a> | <a href="#">791336</a> | predicted gene, ENSMUSG0000005  | <a href="#">ENSMUSG00000053839</a> | 1.109 | 1.22  | 0.260865  | 0.535507 |

|      |          |                                    |                        |                                 |                                    |       |       |           |          |
|------|----------|------------------------------------|------------------------|---------------------------------|------------------------------------|-------|-------|-----------|----------|
| 3781 | 10587942 | <a href="#">NM_011916</a>          | <a href="#">24127</a>  | 5'-3' exoribonuclease 1         | <a href="#">Xrn1</a>               | 1.109 | 1.172 | 0.278429  | 0.553444 |
| 3782 | 10429385 |                                    |                        |                                 |                                    | 1.109 | 0.786 | 0.457129  | 0.712903 |
| 3783 | 10504534 | <a href="#">NM_001081172</a>       | <a href="#">666060</a> | FERM and PDZ domain containing  | <a href="#">Frmpp1</a>             | 1.109 | 1.809 | 0.112158  | 0.331562 |
| 3784 | 10467852 | <a href="#">NM_145156</a>          | <a href="#">246696</a> | solute carrier family 25, memb  | <a href="#">Slc25a28</a>           | 1.109 | 2.193 | 0.0632484 | 0.233146 |
| 3785 | 10410650 | <a href="#">NM_146231</a>          | <a href="#">235956</a> | zinc finger protein 825         | <a href="#">Zfp825</a>             | 1.109 | 1.275 | 0.241696  | 0.514457 |
| 3786 | 10377560 | <a href="#">NM_026991</a>          | <a href="#">69215</a>  | spermidine/spermine N1-acetyl   | <a href="#">Sat2</a>               | 1.109 | 1.057 | 0.324725  | 0.60112  |
| 3787 | 10535231 | <a href="#">NM_175274</a>          | <a href="#">78339</a>  | tweety homolog 3 (Drosophila)   | <a href="#">Ttyh3</a>              | 1.109 | 2.038 | 0.0797693 | 0.269041 |
| 3788 | 10354418 | <a href="#">NM_028696</a>          | <a href="#">109019</a> | oligonucleotide/oligosaccharid  | <a href="#">Obfc2a</a>             | 1.109 | 0.339 | 0.744068  | 0.891263 |
| 3789 | 10410547 | <a href="#">NM_028186</a>          | <a href="#">72293</a>  | naked cuticle 2 homolog (Droso  | <a href="#">Nkd2</a>               | 1.109 | 2.376 | 0.0481451 | 0.195916 |
| 3790 | 10394158 | <a href="#">NM_008445</a>          | <a href="#">16570</a>  | kinesin family member 3C        | <a href="#">Kif3c</a>              | 1.109 | 1.714 | 0.129034  | 0.360251 |
| 3791 | 10578042 | <a href="#">XM_282816</a>          | <a href="#">330731</a> | predicted gene, EG330731        | <a href="#">EG330731</a>           | 1.109 | 1.192 | 0.271075  | 0.545712 |
| 3792 | 10450379 | <a href="#">NM_023893</a>          | <a href="#">78376</a>  | Ng23 protein                    | <a href="#">Ng23</a>               | 1.108 | 1.278 | 0.240865  | 0.513859 |
| 3793 | 10516950 | <a href="#">NM_201368</a>          | <a href="#">381560</a> | X Kell blood group precursor r  | <a href="#">Xkr8</a>               | 1.108 | 1.704 | 0.130926  | 0.363197 |
| 3794 | 10511755 | <a href="#">NM_177327</a>          | <a href="#">107568</a> | WW domain containing E3 ubiqui  | <a href="#">Wwp1</a>               | 1.108 | 1.025 | 0.338336  | 0.6139   |
| 3795 | 10455687 | <a href="#">NM_001081224</a>       | <a href="#">71373</a>  | proline rich 16                 | <a href="#">Prr16</a>              | 1.108 | 1.143 | 0.289505  | 0.56553  |
| 3796 | 10456206 | <a href="#">BC125573</a>           | <a href="#">104082</a> | WD repeat domain 7              | <a href="#">Wdr7</a>               | 1.108 | 1.412 | 0.199699  | 0.461464 |
| 3797 | 10441494 | <a href="#">NM_001103181</a>       | <a href="#">68842</a>  | tubby like protein 4            | <a href="#">Tulp4</a>              | 1.108 | 1.903 | 0.0975381 | 0.304315 |
| 3798 | 10514421 | <a href="#">NM_175305</a>          | <a href="#">100061</a> | leucine rich repeat containing  | <a href="#">Lrrc19</a>             | 1.108 | 1.358 | 0.215456  | 0.482533 |
| 3799 | 10507933 | <a href="#">NM_008385</a>          | <a href="#">16330</a>  | inositol polyphosphate-5-phosp  | <a href="#">Inpp5b</a>             | 1.108 | 1.713 | 0.129244  | 0.360472 |
| 3800 | 10362294 | <a href="#">NM_176837</a>          | <a href="#">73910</a>  | Rho GTPase activating protein   | <a href="#">Arhgap18</a>           | 1.108 | 0.927 | 0.3838    | 0.653229 |
| 3801 | 10452556 | <a href="#">NM_024448</a>          | <a href="#">19328</a>  | RAB12, member RAS oncogene fam  | <a href="#">Rab12</a>              | 1.108 | 0.458 | 0.660724  | 0.848802 |
| 3802 | 10479887 | <a href="#">NM_021305</a>          | <a href="#">57743</a>  | Sec61, alpha subunit 2 (S. cer  | <a href="#">Sec61a2</a>            | 1.108 | 0.958 | 0.369008  | 0.639743 |
| 3803 | 10453627 | <a href="#">AK043736</a>           | <a href="#">433157</a> | hypothetical gene supported by  | <a href="#">LOC433157</a>          | 1.108 | 1.302 | 0.232882  | 0.503895 |
| 3804 | 10547869 | <a href="#">NM_013534</a>          | <a href="#">14789</a>  | leprecan-like 2                 | <a href="#">Leprel2</a>            | 1.108 | 1.686 | 0.134367  | 0.36953  |
| 3805 | 10596231 | <a href="#">ENSMUST00000035170</a> | <a href="#">235567</a> | DnaJ (Hsp40) homolog, subfamil  | <a href="#">Dnajc13</a>            | 1.108 | 2.058 | 0.0774084 | 0.264201 |
| 3806 | 10591563 | <a href="#">NM_145611</a>          | <a href="#">235041</a> | KN motif and ankyrin repeat do  | <a href="#">Kank2</a>              | 1.108 | 2.178 | 0.0646823 | 0.236862 |
| 3807 | 10544982 | <a href="#">NM_026004</a>          | <a href="#">107569</a> | 5'-nucleotidase, cytosolic III  | <a href="#">Nt5c3</a>              | 1.108 | 0.885 | 0.404882  | 0.669594 |
| 3808 | 10565852 | <a href="#">ENSMUST00000080817</a> | <a href="#">108937</a> | ring finger protein 169         | <a href="#">Rnf169</a>             | 1.107 | 1.323 | 0.226356  | 0.496985 |
| 3809 | 10493900 | <a href="#">NM_033175</a>          | <a href="#">94060</a>  | late cornified envelope 3C      | <a href="#">Lee3c</a>              | 1.107 | 0.972 | 0.362458  | 0.633904 |
| 3810 | 10399421 | <a href="#">NM_008709</a>          | <a href="#">18109</a>  | v-myc myelocytomatosis viral r  | <a href="#">Mycn</a>               | 1.107 | 1.13  | 0.29472   | 0.570991 |
| 3811 | 10412235 | <a href="#">ENSMUST00000057096</a> | <a href="#">319803</a> | RIKEN cDNA A430090L17 gene      | <a href="#">A430090L17Rik</a>      | 1.107 | 2.167 | 0.0658192 | 0.239203 |
| 3812 | 10420891 | <a href="#">NM_172604</a>          | <a href="#">219151</a> | scavenger receptor class A, me  | <a href="#">Scara3</a>             | 1.107 | 1.301 | 0.233439  | 0.504686 |
| 3813 | 10508797 | <a href="#">AY512921</a>           | <a href="#">791321</a> | predicted gene, ENSMUSG00000006 | <a href="#">ENSMUSG00000066041</a> | 1.107 | 1.729 | 0.126159  | 0.355658 |
| 3814 | 10360664 | <a href="#">ENSMUST00000070201</a> | <a href="#">791296</a> | predicted gene, ENSMUSG0000005  | <a href="#">ENSMUSG00000056615</a> | 1.107 | 1.082 | 0.313958  | 0.590809 |
| 3815 | 10578138 | <a href="#">NM_011722</a>          | <a href="#">22428</a>  | dynactin 6                      | <a href="#">Dctn6</a>              | 1.107 | 1.06  | 0.32321   | 0.599838 |
| 3816 | 10449815 | <a href="#">NM_020508</a>          | <a href="#">57261</a>  | bromodomain containing 4        | <a href="#">Brd4</a>               | 1.107 | 1.911 | 0.0964548 | 0.302302 |
| 3817 | 10505528 |                                    |                        |                                 |                                    | 1.107 | 1.328 | 0.224641  | 0.494757 |
| 3818 | 10427199 | <a href="#">NM_027044</a>          | <a href="#">56612</a>  | prefoldin 5                     | <a href="#">Pfdn5</a>              | 1.107 | 1.387 | 0.206784  | 0.471259 |
| 3819 | 10412335 | <a href="#">NM_021459</a>          | <a href="#">16392</a>  | ISL1 transcription factor, LIM  | <a href="#">Isl1</a>               | 1.107 | 0.144 | 0.889463  | 0.956457 |
| 3820 | 10404051 | <a href="#">NM_175654</a>          | <a href="#">319156</a> | histone cluster 1, H4d          | <a href="#">Hist1h4d</a>           | 1.107 | 0.655 | 0.533092  | 0.767147 |
| 3821 | 10363860 | <a href="#">NM_025807</a>          | <a href="#">66859</a>  | solute carrier family 16 (mono  | <a href="#">Slc16a9</a>            | 1.107 | 1.251 | 0.2501    | 0.524217 |
| 3822 | 10356520 | <a href="#">AF064749</a>           | <a href="#">12835</a>  | collagen, type VI, alpha 3      | <a href="#">Col6a3</a>             | 1.107 | 1.087 | 0.31219   | 0.58853  |
| 3823 | 10368041 | <a href="#">NM_028440</a>          | <a href="#">73112</a>  | RIKEN cDNA 3110003A17 gene      | <a href="#">3110003A17Rik</a>      | 1.107 | 1.092 | 0.309837  | 0.586709 |
| 3824 | 10500122 | <a href="#">NM_134253</a>          | <a href="#">171388</a> | BCL2/adenovirus E1B 19kD inter  | <a href="#">Bnip1</a>              | 1.107 | 1.694 | 0.132862  | 0.366501 |
| 3825 | 10581197 | <a href="#">NM_177788</a>          | <a href="#">277978</a> | exocyst complex component 3-li  | <a href="#">Exoc3l</a>             | 1.107 | 1.994 | 0.0852325 | 0.280273 |
| 3826 | 10537026 | <a href="#">NM_027926</a>          | <a href="#">71791</a>  | carboxypeptidase A4             | <a href="#">Cpa4</a>               | 1.107 | 1.193 | 0.27076   | 0.545372 |
| 3827 | 10572533 | <a href="#">NM_015742</a>          | <a href="#">17925</a>  | myosin IXb                      | <a href="#">Myo9b</a>              | 1.107 | 2.079 | 0.0750097 | 0.258984 |
| 3828 | 10440393 | <a href="#">NM_023380</a>          | <a href="#">67742</a>  | SAM domain, SH3 domain and nuc  | <a href="#">Samsn1</a>             | 1.107 | 1.742 | 0.123799  | 0.352065 |
| 3829 | 10573703 | <a href="#">NM_029074</a>          | <a href="#">382030</a> | transmembrane protein 188       | <a href="#">Tmem188</a>            | 1.107 | 1.749 | 0.122544  | 0.350144 |

|      |          |                                    |                           |                                |                                   |       |       |           |          |
|------|----------|------------------------------------|---------------------------|--------------------------------|-----------------------------------|-------|-------|-----------|----------|
| 3830 | 10568988 | <a href="#">NM_018742</a>          | <a href="#">54399</a>     | blocked early in transport 1 h | <a href="#">Bet1l</a>             | 1.107 | 1.036 | 0.333769  | 0.609432 |
| 3831 | 10550146 | <a href="#">NM_013877</a>          | <a href="#">29865</a>     | calcium binding protein 5      | <a href="#">Cabp5</a>             | 1.107 | 1.791 | 0.115128  | 0.337402 |
| 3832 | 10483633 | <a href="#">NM_001018042</a>       | <a href="#">20687</a>     | trans-acting transcription fac | <a href="#">Sp3</a>               | 1.106 | 1.539 | 0.166508  | 0.417287 |
| 3833 | 10381018 | <a href="#">NM_028722</a>          | <a href="#">74026</a>     | RIKEN cDNA 4121402D02 gene     | <a href="#">4121402D02Rik</a>     | 1.106 | 1.82  | 0.110262  | 0.328467 |
| 3834 | 10479988 | <a href="#">NM_027748</a>          | <a href="#">209361</a>    | TAF3 RNA polymerase II, TATA b | <a href="#">Taf3</a>              | 1.106 | 1.003 | 0.348515  | 0.622153 |
| 3835 | 10456317 | <a href="#">NM_207255</a>          | <a href="#">328977</a>    | zinc finger protein 532        | <a href="#">Zfp532</a>            | 1.106 | 1.834 | 0.108129  | 0.32441  |
| 3836 | 10520698 | <a href="#">NM_177677</a>          | <a href="#">231098</a>    | DnaJ (Hsp40) homolog, subfamil | <a href="#">Dnajc5g</a>           | 1.106 | 1.484 | 0.180179  | 0.435693 |
| 3837 | 10551359 | <a href="#">NM_018820</a>          | <a href="#">55942</a>     | SERTA domain containing 1      | <a href="#">Sertad1</a>           | 1.106 | 1.229 | 0.257557  | 0.531659 |
| 3838 | 10523865 | <a href="#">NM_182745</a>          | <a href="#">76421</a>     | RIKEN cDNA 1700028K03 gene     | <a href="#">1700028K03Rik</a>     | 1.106 | 2.264 | 0.0569029 | 0.218163 |
| 3839 | 10376897 |                                    |                           |                                |                                   | 1.106 | 0.833 | 0.431353  | 0.691897 |
| 3840 | 10505489 | <a href="#">NM_021362</a>          | <a href="#">18491</a>     | pregnancy-associated plasma pr | <a href="#">Pappa</a>             | 1.106 | 1.679 | 0.135691  | 0.371434 |
| 3841 | 10525387 | <a href="#">NM_024216</a>          | <a href="#">68080</a>     | ATP binding domain 1 family, m | <a href="#">Atpbd1c</a>           | 1.106 | 0.753 | 0.475538  | 0.72707  |
| 3842 | 10590433 |                                    |                           |                                |                                   | 1.106 | 0.869 | 0.412598  | 0.676183 |
| 3843 | 10428827 | <a href="#">NM_175212</a>          | <a href="#">74868</a>     | transmembrane protein 65       | <a href="#">Tmem65</a>            | 1.106 | 1.25  | 0.250408  | 0.524406 |
| 3844 | 10519942 | <a href="#">ENSMUST00000088514</a> | <a href="#">50791</a>     | membrane associated guanylate  | <a href="#">Magi2</a>             | 1.106 | 1.658 | 0.140087  | 0.378724 |
| 3845 | 10402598 | <a href="#">ENSMUST00000073156</a> | <a href="#">380785</a>    | brain-enriched guanylate kinas | <a href="#">Begain</a>            | 1.106 | 1.927 | 0.094139  | 0.297861 |
| 3846 | 10562204 | <a href="#">NM_022007</a>          | <a href="#">57780</a>     | FXYP domain-containing ion tra | <a href="#">Fxyd7</a>             | 1.106 | 2.127 | 0.0697876 | 0.247552 |
| 3847 | 10494174 | <a href="#">NM_011351</a>          | <a href="#">20360</a>     | sema domain, transmembrane dom | <a href="#">Sema6c</a>            | 1.106 | 1.859 | 0.104103  | 0.31726  |
| 3848 | 10472538 | <a href="#">NM_175512</a>          | <a href="#">241452</a>    | dehydrogenase/reductase (SDR f | <a href="#">Dhrs9</a>             | 1.106 | 1.502 | 0.175594  | 0.429072 |
| 3849 | 10402294 | <a href="#">NM_022323</a>          | <a href="#">64113</a>     | modulator of apoptosis 1       | <a href="#">Moap1</a>             | 1.106 | 1.317 | 0.228156  | 0.499185 |
| 3850 | 10554045 | <a href="#">NM_001033877</a>       | <a href="#">233332</a>    | a disintegrin-like and metallo | <a href="#">Adamts17</a>          | 1.106 | 1.258 | 0.247648  | 0.520853 |
| 3851 | 10380558 |                                    |                           |                                |                                   | 1.106 | 1.263 | 0.245937  | 0.51897  |
| 3852 | 10523856 |                                    |                           |                                |                                   | 1.106 | 0.53  | 0.612305  | 0.820234 |
| 3853 | 10433219 | <a href="#">NM_029090</a>          | <a href="#">74763</a>     | RIKEN cDNA 1200013P24 gene     | <a href="#">1200013P24Rik</a>     | 1.106 | 1.185 | 0.273638  | 0.548314 |
| 3854 | 10529034 | <a href="#">BC023116</a>           | <a href="#">68567</a>     | cell growth regulator with EF  | <a href="#">Cgref1</a>            | 1.106 | 1.424 | 0.196281  | 0.45671  |
| 3855 | 10445373 | <a href="#">ENSMUST00000097319</a> | <a href="#">320063</a>    | RIKEN cDNA B230354K17 gene     | <a href="#">B230354K17Rik</a>     | 1.106 | 0.427 | 0.681731  | 0.859336 |
| 3856 | 10573908 |                                    |                           |                                |                                   | 1.106 | 1.309 | 0.230769  | 0.501612 |
| 3857 | 10465366 | <a href="#">NM_024231</a>          | <a href="#">81909</a>     | zinc finger like protein 1     | <a href="#">Zfp11</a>             | 1.106 | 1.153 | 0.285519  | 0.560861 |
| 3858 | 10584407 | <a href="#">NM_001011806</a>       | <a href="#">258028</a>    | olfactory receptor 901         | <a href="#">Olfr901</a>           | 1.106 | 1.149 | 0.287329  | 0.562985 |
| 3859 | 10463404 | <a href="#">NM_001081225</a>       | <a href="#">226151</a>    | RIKEN cDNA 6030443O07 gene     | <a href="#">6030443O07Rik</a>     | 1.106 | 1.184 | 0.273866  | 0.548502 |
| 3860 | 10520521 | <a href="#">NM_007681</a>          | <a href="#">12615</a>     | centromere protein A           | <a href="#">Cenpa</a>             | 1.106 | 1.725 | 0.12689   | 0.356872 |
| 3861 | 10596093 | <a href="#">XM_356179</a>          | <a href="#">382099</a>    | predicted gene, EG382099       | <a href="#">EG382099</a>          | 1.106 | 1.775 | 0.117919  | 0.342718 |
| 3862 | 10604094 | <a href="#">NM_001033785</a>       | <a href="#">434756</a>    | A kinase (PRKA) anchor protein | <a href="#">Akap14</a>            | 1.106 | 1.566 | 0.160055  | 0.407342 |
| 3863 | 10585572 | <a href="#">NM_025812</a>          | <a href="#">66867</a>     | high mobility group 20A        | <a href="#">Hmg20a</a>            | 1.105 | 1.275 | 0.241778  | 0.514522 |
| 3864 | 10356577 | <a href="#">NM_023343</a>          | <a href="#">67444</a>     | integrin-linked kinase-associa | <a href="#">Ilkap</a>             | 1.105 | 1.213 | 0.263358  | 0.538069 |
| 3865 | 10468489 | <a href="#">NM_133216</a>          | <a href="#">170750</a>    | X-prolyl aminopeptidase (amino | <a href="#">Xpnpep1</a>           | 1.105 | 1.002 | 0.348705  | 0.622353 |
| 3866 | 10608509 |                                    |                           |                                |                                   | 1.105 | 0.836 | 0.429826  | 0.690652 |
| 3867 | 10513188 | <a href="#">ENSMUST00000098063</a> | <a href="#">100038668</a> | predicted gene, OTTMUSG0000000 | <a href="#">OTTMUSG0000007322</a> | 1.105 | 0.977 | 0.360247  | 0.632213 |
| 3868 | 10510725 | <a href="#">NM_001081376</a>       | <a href="#">269610</a>    | chromodomain helicase DNA bind | <a href="#">Chd5</a>              | 1.105 | 2.156 | 0.0668324 | 0.241483 |
| 3869 | 10527448 | <a href="#">NM_001008705</a>       | <a href="#">231889</a>    | BUD31 homolog (yeast)          | <a href="#">Bud31</a>             | 1.105 | 0.693 | 0.510052  | 0.751325 |
| 3870 | 10395273 | <a href="#">BC052902</a>           | <a href="#">14546</a>     | ganglioside-induced differenti | <a href="#">Gdap10</a>            | 1.105 | 0.663 | 0.527939  | 0.763369 |
| 3871 | 10493394 | <a href="#">NM_007712</a>          | <a href="#">12748</a>     | CDC-like kinase 2              | <a href="#">Clk2</a>              | 1.105 | 1.953 | 0.0904801 | 0.290658 |
| 3872 | 10544406 | <a href="#">NM_029528</a>          | <a href="#">76156</a>     | RIKEN cDNA 6330503C03 gene     | <a href="#">6330503C03Rik</a>     | 1.105 | 1.798 | 0.113992  | 0.334988 |
| 3873 | 10519346 | <a href="#">BC099581</a>           | <a href="#">77036</a>     | RIKEN cDNA 1700109H08 gene     | <a href="#">1700109H08Rik</a>     | 1.105 | 0.764 | 0.469293  | 0.721467 |
| 3874 | 10596041 | <a href="#">NM_001033543</a>       | <a href="#">213208</a>    | interleukin 20 receptor beta   | <a href="#">Il20rb</a>            | 1.105 | 2.195 | 0.063077  | 0.232827 |
| 3875 | 10484457 | <a href="#">NM_133840</a>          | <a href="#">98985</a>     | CLP1, cleavage and polyadenyla | <a href="#">Clp1</a>              | 1.105 | 0.772 | 0.464593  | 0.718344 |
| 3876 | 10518812 | <a href="#">NM_001081557</a>       | <a href="#">100072</a>    | calmodulin binding transcripti | <a href="#">Camta1</a>            | 1.105 | 1.509 | 0.173736  | 0.426449 |
| 3877 | 10469151 | <a href="#">NM_172471</a>          | <a href="#">299378</a>    | inter-alpha (globulin) inhibit | <a href="#">Iih5</a>              | 1.105 | 1.303 | 0.332678  | 0.503683 |
| 3878 | 10491224 | <a href="#">NM_001004190</a>       | <a href="#">434577</a>    | zinc finger protein 300        | <a href="#">Zfp300</a>            | 1.105 | 0.389 | 0.38637   | 0.503683 |
| 3879 | 10482144 | <a href="#">NM_001100591</a>       | <a href="#">319817</a>    | ring finger and CCH-type zinc  | <a href="#">Rc3h2</a>             | 1.105 | 1.805 | 0.112732  | 0.33261  |

|      |          |                                    |                           |                                                         |                                    |       |       |           |          |
|------|----------|------------------------------------|---------------------------|---------------------------------------------------------|------------------------------------|-------|-------|-----------|----------|
| 3880 | 10456501 | <a href="#">NM_026440</a>          | <a href="#">67897</a>     | RNA (guanine-7-) methyltransferase                      | <a href="#">Rnmt</a>               | 1.105 | 0.911 | 0.391908  | 0.660136 |
| 3881 | 10531259 | <a href="#">ENSMUST00000101038</a> | <a href="#">100038686</a> | predicted gene, ENSMUSG0000007                          | <a href="#">ENSMUSG00000072833</a> | 1.105 | 1.529 | 0.168959  | 0.420416 |
| 3882 | 10514865 | <a href="#">NM_025590</a>          | <a href="#">329910</a>    | acyl-CoA thioesterase 11                                | <a href="#">Acot11</a>             | 1.105 | 1.826 | 0.109297  | 0.326638 |
| 3883 | 10507473 |                                    |                           |                                                         |                                    | 1.105 | 1.422 | 0.196836  | 0.457653 |
| 3884 | 10426479 | <a href="#">NM_175344</a>          | <a href="#">105722</a>    | transmembrane protein 16F                               | <a href="#">Tmem16f</a>            | 1.105 | 0.662 | 0.528744  | 0.764097 |
| 3885 | 10350749 | <a href="#">NM_001008426</a>       | <a href="#">433365</a>    | predicted gene, EG433365                                | <a href="#">EG433365</a>           | 1.105 | 1.334 | 0.222765  | 0.492656 |
| 3886 | 10450101 |                                    |                           |                                                         |                                    | 1.105 | 1.434 | 0.193341  | 0.452663 |
| 3887 | 10349427 |                                    |                           |                                                         |                                    | 1.105 | 1.937 | 0.0926986 | 0.294873 |
| 3888 | 10436369 | <a href="#">BC062166</a>           | <a href="#">78749</a>     | RIKEN cDNA 4631422O05 gene                              | <a href="#">4631422O05Rik</a>      | 1.105 | 1.003 | 0.348312  | 0.622132 |
| 3889 | 10369485 | <a href="#">NM_007731</a>          | <a href="#">12817</a>     | collagen, type XIII, alpha 1                            | <a href="#">Col13a1</a>            | 1.105 | 2.124 | 0.0701371 | 0.248239 |
| 3890 | 10605711 | <a href="#">NM_145630</a>          | <a href="#">236900</a>    | pyruvate dehydrogenase kinase, beta                     | <a href="#">Pdk3</a>               | 1.105 | 0.818 | 0.439609  | 0.698931 |
| 3891 | 10399555 | <a href="#">NM_201531</a>          | <a href="#">382571</a>    | potassium voltage-gated channel subunit S1              | <a href="#">Kcnf1</a>              | 1.105 | 1.016 | 0.342647  | 0.616958 |
| 3892 | 10488722 | <a href="#">NM_133850</a>          | <a href="#">99311</a>     | COMM domain containing 7                                | <a href="#">Commd7</a>             | 1.105 | 1.092 | 0.310104  | 0.586794 |
| 3893 | 10351277 | <a href="#">NM_138314</a>          | <a href="#">171567</a>    | non-metastatic cells 7, protein                         | <a href="#">Nme7</a>               | 1.105 | 0.561 | 0.591715  | 0.806879 |
| 3894 | 10445442 | <a href="#">NM_019581</a>          | <a href="#">56055</a>     | GTP binding protein 2                                   | <a href="#">Gtbp2</a>              | 1.105 | 1.989 | 0.0857681 | 0.281088 |
| 3895 | 10410716 | <a href="#">NM_175495</a>          | <a href="#">238725</a>    | G protein-coupled receptor 150                          | <a href="#">Gpr150</a>             | 1.105 | 2.202 | 0.062467  | 0.231354 |
| 3896 | 10524525 | <a href="#">NM_054093</a>          | <a href="#">117146</a>    | ubiquitin protein ligase E3B1                           | <a href="#">Ube3b</a>              | 1.105 | 1.21  | 0.26427   | 0.539355 |
| 3897 | 10468881 | <a href="#">BC086681</a>           | <a href="#">414758</a>    | RIKEN cDNA 5830428H23 gene                              | <a href="#">5830428H23Rik</a>      | 1.105 | 0.317 | 0.760107  | 0.89957  |
| 3898 | 10470462 | <a href="#">NM_015734</a>          | <a href="#">12831</a>     | collagen, type V, alpha 1                               | <a href="#">Col5a1</a>             | 1.104 | 1.599 | 0.152536  | 0.396392 |
| 3899 | 10588592 | <a href="#">NM_020263</a>          | <a href="#">56808</a>     | calcium channel, voltage-dependent L type               | <a href="#">Caena2d2</a>           | 1.104 | 1.847 | 0.106009  | 0.321126 |
| 3900 | 10519270 | <a href="#">NM_021604</a>          | <a href="#">11603</a>     | agrin                                                   | <a href="#">Agrn</a>               | 1.104 | 1.527 | 0.169261  | 0.42056  |
| 3901 | 10349661 | <a href="#">NM_145509</a>          | <a href="#">226421</a>    | RIKEN cDNA 5430435G22 gene                              | <a href="#">5430435G22Rik</a>      | 1.104 | 1.705 | 0.130753  | 0.362909 |
| 3902 | 10410362 | <a href="#">ENSMUST00000071628</a> | <a href="#">78251</a>     | zinc finger protein 712                                 | <a href="#">Zfp712</a>             | 1.104 | 0.171 | 0.869164  | 0.947675 |
| 3903 | 10570644 | <a href="#">NM_001025353</a>       | <a href="#">574083</a>    | predicted gene, EG574083                                | <a href="#">EG574083</a>           | 1.104 | 1.148 | 0.287425  | 0.563027 |
| 3904 | 10493688 | <a href="#">ENSMUST00000029548</a> | <a href="#">77595</a>     | nucleoporin 210-like                                    | <a href="#">Nup210l</a>            | 1.104 | 1.871 | 0.102232  | 0.313502 |
| 3905 | 10527571 |                                    |                           |                                                         |                                    | 1.104 | 0.47  | 0.65202   | 0.844083 |
| 3906 | 10579525 | <a href="#">NM_032398</a>          | <a href="#">84094</a>     | plasmalemma vesicle associated protein 1                | <a href="#">Plvap</a>              | 1.104 | 1.852 | 0.105163  | 0.319429 |
| 3907 | 10410168 | <a href="#">ENSMUST00000116396</a> | <a href="#">218304</a>    | gene model 274, (NCBI)                                  | <a href="#">Gm274</a>              | 1.104 | 2.085 | 0.074336  | 0.257888 |
| 3908 | 10525489 | <a href="#">ENSMUST00000100731</a> | <a href="#">208043</a>    | SET domain containing 1B                                | <a href="#">Setd1b</a>             | 1.104 | 1.175 | 0.277206  | 0.552231 |
| 3909 | 10349876 | <a href="#">NM_182930</a>          | <a href="#">240753</a>    | pleckstrin homology domain containing 13                | <a href="#">Plekha6</a>            | 1.104 | 1.359 | 0.215207  | 0.482283 |
| 3910 | 10515558 | <a href="#">NM_009711</a>          | <a href="#">11876</a>     | artemin                                                 | <a href="#">Artn</a>               | 1.104 | 1.712 | 0.129332  | 0.360575 |
| 3911 | 10393373 | <a href="#">NM_011371</a>          | <a href="#">20445</a>     | ST6 (alpha-N-acetyl-neuraminyl 6Sialosyl transferase 6) | <a href="#">St6galnac1</a>         | 1.104 | 1.204 | 0.26664   | 0.541268 |
| 3912 | 10408225 | <a href="#">NM_178208</a>          | <a href="#">319155</a>    | histone cluster 1, H4c                                  | <a href="#">Hist1h4c</a>           | 1.104 | 0.24  | 0.817129  | 0.927197 |
| 3913 | 10591739 | <a href="#">NM_001102404</a>       | <a href="#">11433</a>     | acid phosphatase 5, tartrate resistant                  | <a href="#">Acp5</a>               | 1.104 | 0.865 | 0.415005  | 0.678382 |
| 3914 | 10430920 | <a href="#">NM_001114140</a>       | <a href="#">21411</a>     | transcription factor 20                                 | <a href="#">Tcf20</a>              | 1.104 | 1.898 | 0.0982249 | 0.305827 |
| 3915 | 10529480 | <a href="#">ENSMUST00000068438</a> | <a href="#">74364</a>     | RIKEN cDNA 4931431C16 gene                              | <a href="#">4931431C16Rik</a>      | 1.104 | 1.781 | 0.116926  | 0.340629 |
| 3916 | 10578757 |                                    |                           |                                                         |                                    | 1.104 | 0.92  | 0.387501  | 0.656379 |
| 3917 | 10512088 | <a href="#">NM_134097</a>          | <a href="#">106021</a>    | topoisomerase I binding, arginine                       | <a href="#">Topors</a>             | 1.104 | 0.94  | 0.377755  | 0.64758  |
| 3918 | 10601150 |                                    |                           |                                                         |                                    | 1.104 | 0.704 | 0.5038    | 0.746156 |
| 3919 | 10379060 | <a href="#">NM_001045516</a>       | <a href="#">216974</a>    | RIKEN cDNA 4933404M19 gene                              | <a href="#">4933404M19Rik</a>      | 1.104 | 0.466 | 0.654693  | 0.845294 |
| 3920 | 10377924 | <a href="#">NM_010326</a>          | <a href="#">14723</a>     | glycoprotein 1b, alpha polypeptide                      | <a href="#">Gp1ba</a>              | 1.104 | 1.565 | 0.160415  | 0.407767 |
| 3921 | 10410273 | <a href="#">NM_001012325</a>       | <a href="#">432769</a>    | zinc finger protein 708                                 | <a href="#">Zfp708</a>             | 1.104 | 1.695 | 0.132732  | 0.366429 |
| 3922 | 10531274 | <a href="#">NM_007568</a>          | <a href="#">12223</a>     | betacellulin, epidermal growth factor receptor ligand   | <a href="#">Btc</a>                | 1.103 | 1.342 | 0.22016   | 0.488992 |
| 3923 | 10414025 | <a href="#">NM_145741</a>          | <a href="#">14560</a>     | growth differentiation factor 10                        | <a href="#">Gdf10</a>              | 1.103 | 0.591 | 0.572373  | 0.796254 |
| 3924 | 10400395 | <a href="#">NM_021529</a>          | <a href="#">59032</a>     | protein phosphatase 2, regulatory (inhibitory)          | <a href="#">Ppp2r3c</a>            | 1.103 | 0.765 | 0.468685  | 0.720927 |
| 3925 | 10598765 | <a href="#">NM_025738</a>          | <a href="#">66742</a>     | cysteine-rich perinuclear protein                       | <a href="#">Cypf6</a>              | 1.103 | 1.523 | 0.170211  | 0.421869 |
| 3926 | 10554588 | <a href="#">NM_017400</a>          | <a href="#">20408</a>     | SH3-domain GRB2-like 3                                  | <a href="#">Sh3gl3</a>             | 1.103 | 1.594 | 0.153816  | 0.398321 |
| 3927 | 10527538 | <a href="#">NM_026864</a>          | <a href="#">68895</a>     | RAS-like, family 11, member A                           | <a href="#">Rasl11a</a>            | 1.103 | 2.185 | 0.0640796 | 0.235266 |
| 3928 | 10553967 | <a href="#">ENSMUST00000055576</a> | <a href="#">18553</a>     | proprotein convertase subtilisin/kexin type 1           | <a href="#">Pcsk6</a>              | 1.103 | 1.239 | 0.254172  | 0.528502 |
| 3929 | 10382888 | <a href="#">AK171830</a>           | <a href="#">76972</a>     | RIKEN cDNA 2810008D09 gene                              | <a href="#">2810008D09Rik</a>      | 1.103 | 0.836 | 0.429869  | 0.690652 |
| 3930 | 10407199 | <a href="#">NM_145538</a>          | <a href="#">407243</a>    | transmembrane protein 189                               | <a href="#">Tmem189</a>            | 1.103 | 0.965 | 0.365801  | 0.636847 |

|      |                          |                                    |                        |                                   |                                    |       |       |           |          |
|------|--------------------------|------------------------------------|------------------------|-----------------------------------|------------------------------------|-------|-------|-----------|----------|
| 3930 | <a href="#">10177155</a> | <a href="#">NM_178228</a>          | <a href="#">107218</a> | transmembrane protein 10          | <a href="#">Tmem10z</a>            | 1.103 | 0.733 | 0.585801  | 0.585817 |
| 3931 | 10463061                 | <a href="#">ENSMUST00000068094</a> | <a href="#">107141</a> | cytochrome P450, family 2, sub    | <a href="#">Cyp2c50</a>            | 1.103 | 2.247 | 0.0583368 | 0.221848 |
| 3932 | 10395428                 | <a href="#">NM_178681</a>          | <a href="#">217480</a> | diacylglycerol kinase, beta       | <a href="#">Dgkb</a>               | 1.103 | 0.566 | 0.588806  | 0.805202 |
| 3933 | 10525397                 | <a href="#">NM_019824</a>          | <a href="#">56378</a>  | actin related protein 2/3 comp    | <a href="#">Arpc3</a>              | 1.103 | 0.752 | 0.475683  | 0.727129 |
| 3934 | 10411853                 | <a href="#">NM_001005868</a>       | <a href="#">59079</a>  | ErbB2 interacting protein         | <a href="#">ErbB2ip</a>            | 1.103 | 1.585 | 0.155661  | 0.401373 |
| 3935 | 10353923                 | <a href="#">NM_201365</a>          | <a href="#">381337</a> | cDNA sequence BC050210            | <a href="#">BC050210</a>           | 1.103 | 1.895 | 0.0987595 | 0.306809 |
| 3936 | 10518408                 | <a href="#">NM_011122</a>          | <a href="#">18822</a>  | procollagen-lysine, 2-oxogluta    | <a href="#">Plod1</a>              | 1.103 | 1.433 | 0.193617  | 0.453103 |
| 3937 | 10492668                 | <a href="#">ENSMUST00000091023</a> | <a href="#">75879</a>  | RIKEN cDNA 4930589L23 gene        | <a href="#">4930589L23Rik</a>      | 1.103 | 1.299 | 0.234044  | 0.50534  |
| 3938 | 10582941                 | <a href="#">NM_027545</a>          | <a href="#">244672</a> | CWF19-like 2, cell cycle contr    | <a href="#">Cwf19l2</a>            | 1.103 | 1.074 | 0.317488  | 0.594727 |
| 3939 | 10459530                 | <a href="#">ENSMUST00000054227</a> | <a href="#">338360</a> | RIKEN cDNA B430212C06 gene        | <a href="#">B430212C06Rik</a>      | 1.103 | 0.922 | 0.386121  | 0.655109 |
| 3940 | 10598933                 | <a href="#">NM_145628</a>          | <a href="#">236733</a> | ubiquitin specific peptidase 1    | <a href="#">Usp11</a>              | 1.103 | 1.167 | 0.280277  | 0.555618 |
| 3941 | 10535471                 | <a href="#">NM_009007</a>          | <a href="#">19353</a>  | RAS-related C3 botulinum subst    | <a href="#">Rac1</a>               | 1.103 | 1.674 | 0.136809  | 0.373443 |
| 3942 | 10493758                 | <a href="#">NM_139304</a>          | <a href="#">229542</a> | GATA zinc finger domain contai    | <a href="#">Gatad2b</a>            | 1.103 | 2.053 | 0.0779575 | 0.26556  |
| 3943 | 10446044                 | <a href="#">NM_008233</a>          | <a href="#">15193</a>  | hepatoma-derived growth factor    | <a href="#">Hdgfrp2</a>            | 1.103 | 1.95  | 0.0909397 | 0.291551 |
| 3944 | 10542079                 | <a href="#">NM_008021</a>          | <a href="#">14235</a>  | forkhead box M1                   | <a href="#">Foxm1</a>              | 1.103 | 1.174 | 0.277646  | 0.552783 |
| 3945 | 10515983                 | <a href="#">BC023360</a>           | <a href="#">73172</a>  | RIKEN cDNA 3110037I16 gene        | <a href="#">3110037I16Rik</a>      | 1.103 | 1.537 | 0.1669    | 0.417872 |
| 3946 | 10354247                 | <a href="#">NM_010212</a>          | <a href="#">14200</a>  | four and a half LIM domains 2     | <a href="#">Fhl2</a>               | 1.103 | 0.958 | 0.369164  | 0.639859 |
| 3947 | 10386636                 | <a href="#">NM_001004143</a>       | <a href="#">216825</a> | ubiquitin specific peptidase 2    | <a href="#">Usp22</a>              | 1.103 | 1.43  | 0.194565  | 0.454622 |
| 3948 | 10519179                 | <a href="#">ENSMUST00000097743</a> | <a href="#">68946</a>  | RIKEN cDNA 1500002C15 gene        | <a href="#">1500002C15Rik</a>      | 1.103 | 1.274 | 0.242234  | 0.515115 |
| 3949 | 10550860                 | <a href="#">NM_018791</a>          | <a href="#">54678</a>  | zinc finger protein 108           | <a href="#">Zfp108</a>             | 1.103 | 1.041 | 0.331457  | 0.60794  |
| 3950 | 10533285                 | <a href="#">NM_011202</a>          | <a href="#">19247</a>  | protein tyrosine phosphatase,     | <a href="#">Ptpn11</a>             | 1.102 | 0.986 | 0.356222  | 0.628749 |
| 3951 | 10509965                 | <a href="#">NM_010139</a>          | <a href="#">13836</a>  | Eph receptor A2                   | <a href="#">Epha2</a>              | 1.102 | 1.983 | 0.0865785 | 0.282817 |
| 3952 | 10513715                 | <a href="#">BC048618</a>           | <a href="#">75524</a>  | RIKEN cDNA 1700018C11 gene        | <a href="#">1700018C11Rik</a>      | 1.102 | 1.133 | 0.293455  | 0.569562 |
| 3953 | 10490138                 | <a href="#">NM_001081387</a>       | <a href="#">664799</a> | CCCTC-binding factor (zinc fin    | <a href="#">Ctcf1</a>              | 1.102 | 1.885 | 0.10014   | 0.309465 |
| 3954 | 10390458                 | <a href="#">NM_009545</a>          | <a href="#">22658</a>  | polycomb group ring finger 2      | <a href="#">Pcgf2</a>              | 1.102 | 1.839 | 0.107224  | 0.322736 |
| 3955 | 10424439                 | <a href="#">NM_133766</a>          | <a href="#">76740</a>  | EFR3 homolog A (S. cerevisiae)    | <a href="#">Efr3a</a>              | 1.102 | 1.598 | 0.152901  | 0.396925 |
| 3956 | 10558742                 | <a href="#">NM_001081389</a>       | <a href="#">101613</a> | NLR family, pyrin domain conta    | <a href="#">Nlrp6</a>              | 1.102 | 1.407 | 0.201078  | 0.463237 |
| 3957 | 10540105                 | <a href="#">NM_028766</a>          | <a href="#">74122</a>  | transmembrane protein 43          | <a href="#">Tmem43</a>             | 1.102 | 1.529 | 0.168777  | 0.420183 |
| 3958 | 10555586                 | <a href="#">BC092062</a>           | <a href="#">66508</a>  | RIKEN cDNA 2400001E08 gene        | <a href="#">2400001E08Rik</a>      | 1.102 | 0.495 | 0.63512   | 0.834242 |
| 3959 | 10402080                 | <a href="#">BC025577</a>           | <a href="#">217827</a> | cDNA sequence BC002230            | <a href="#">BC002230</a>           | 1.102 | 1.505 | 0.174884  | 0.427987 |
| 3960 | 10424695                 | <a href="#">NM_026730</a>          | <a href="#">68453</a>  | GPI-anchored HDL-binding prote    | <a href="#">Gpibbp1</a>            | 1.102 | 2.003 | 0.0840299 | 0.278005 |
| 3961 | 10435897                 | <a href="#">BC027231</a>           | <a href="#">212547</a> | cDNA sequence BC027231            | <a href="#">BC027231</a>           | 1.102 | 0.603 | 0.565202  | 0.791223 |
| 3962 | 10400896                 | <a href="#">NM_026038</a>          | <a href="#">67217</a>  | RIKEN cDNA 2810055F11 gene        | <a href="#">2810055F11Rik</a>      | 1.102 | 0.846 | 0.424511  | 0.686543 |
| 3963 | 10603175                 |                                    |                        |                                   |                                    | 1.102 | 1.421 | 0.196974  | 0.457727 |
| 3964 | 10598073                 |                                    |                        |                                   |                                    | 1.102 | 0.478 | 0.646989  | 0.840859 |
| 3965 | 10359859                 |                                    |                        |                                   |                                    | 1.102 | 0.89  | 0.402314  | 0.667397 |
| 3966 | 10560282                 | <a href="#">NM_172739</a>          | <a href="#">232906</a> | glucocorticoid receptor DNA bi    | <a href="#">Grif1</a>              | 1.102 | 1.37  | 0.211825  | 0.477389 |
| 3967 | 10538617                 | <a href="#">NM_133737</a>          | <a href="#">71835</a>  | LanC (bacterial lantibiotic sy    | <a href="#">Lancl2</a>             | 1.102 | 1.225 | 0.259067  | 0.533309 |
| 3968 | 10569331                 | <a href="#">ENSMUST00000054910</a> | <a href="#">677289</a> | predicted gene,<br>OTTMUSG0000001 | <a href="#">OTTMUSG00000016823</a> | 1.101 | 1.744 | 0.12347   | 0.351591 |
| 3969 | 10604057                 | <a href="#">NM_019942</a>          | <a href="#">56526</a>  | septin 6                          | <a href="#">Sept6</a>              | 1.101 | 1.37  | 0.211887  | 0.477389 |
| 3970 | 10502042                 | <a href="#">ENSMUST00000029662</a> | <a href="#">71481</a>  | alpha-kinase 1                    | <a href="#">Alpk1</a>              | 1.101 | 0.822 | 0.437356  | 0.696704 |
| 3971 | 10529689                 | <a href="#">NM_011715</a>          | <a href="#">22388</a>  | WD repeat domain 1                | <a href="#">Wdr1</a>               | 1.101 | 1.563 | 0.160866  | 0.408621 |
| 3972 | 10600317                 | <a href="#">NM_008106</a>          | <a href="#">14539</a>  | opsin 1 (cone pigments), mediu    | <a href="#">Opn1mw</a>             | 1.101 | 1.364 | 0.21374   | 0.479961 |
| 3973 | 10380489                 | <a href="#">NM_146025</a>          | <a href="#">217125</a> | sterile alpha motif domain con    | <a href="#">Samd14</a>             | 1.101 | 1.938 | 0.0925253 | 0.294729 |
| 3974 | 10521481                 | <a href="#">NM_178394</a>          | <a href="#">76071</a>  | janus kinase and microtubule i    | <a href="#">Jakmip1</a>            | 1.101 | 1.841 | 0.106973  | 0.322599 |
| 3975 | 10496125                 | <a href="#">NM_020265</a>          | <a href="#">56811</a>  | dickkopf homolog 2 (Xenopus la    | <a href="#">Dkk2</a>               | 1.101 | 0.749 | 0.477499  | 0.728235 |
| 3976 | 10431612                 | <a href="#">NM_026817</a>          | <a href="#">68708</a>  | RAB, member of RAS oncogene fa    | <a href="#">Rabl2a</a>             | 1.101 | 1.804 | 0.112904  | 0.332876 |
| 3977 | 10543219                 | <a href="#">NM_145066</a>          | <a href="#">64450</a>  | G protein-coupled receptor 85     | <a href="#">Gpr85</a>              | 1.101 | 1.429 | 0.194873  | 0.45499  |
| 3978 | 10586967                 | <a href="#">NM_001039251</a>       | <a href="#">639396</a> | predicted gene, EG639396          | <a href="#">EG639396</a>           | 1.101 | 0.96  | 0.368106  | 0.639027 |
| 3979 | 10345046                 | <a href="#">EU520262</a>           | <a href="#">71877</a>  | EF-hand domain (C-terminal) co    | <a href="#">Efhc1</a>              | 1.101 | 1.623 | 0.147402  | 0.389587 |
| 3980 | 10367919                 | <a href="#">BC118516</a>           | <a href="#">74732</a>  | syntaxin 11                       | <a href="#">Stx11</a>              | 1.101 | 0.857 | 0.418937  | 0.681438 |
| 3981 | 10504294                 | <a href="#">NM_001037709</a>       | <a href="#">100213</a> | RUN and SH3 domain                | <a href="#">Rusc2</a>              | 1.101 | 1.556 | 0.162452  | 0.411033 |

|      |          |                                     |                           |                                |                               |       |       |           |           |
|------|----------|-------------------------------------|---------------------------|--------------------------------|-------------------------------|-------|-------|-----------|-----------|
|      |          |                                     |                           | containing                     |                               |       |       |           |           |
| 3982 | 10508788 | <a href="#">NM_146155</a>           | <a href="#">230793</a>    | AT hook, DNA binding motif, co | <a href="#">Ahdc1</a>         | 1.101 | 1.545 | 0.165109  | 0.415207  |
| 3983 | 10368405 | <a href="#">XR_004815</a>           | <a href="#">675684</a>    | similar to Aldose reductase-re | <a href="#">LOC675684</a>     | 1.101 | 0.908 | 0.393231  | 0.66124   |
| 3984 | 10587508 | <a href="#">NM_009445</a>           | <a href="#">22137</a>     | Ttk protein kinase             | <a href="#">Ttk</a>           | 1.101 | 1.444 | 0.190754  | 0.449693  |
| 3985 | 10550795 | <a href="#">NM_011860</a>           | <a href="#">23968</a>     | NLR family, pyrin domain conta | <a href="#">Nlrp5</a>         | 1.101 | 1.124 | 0.297111  | 0.573626  |
| 3986 | 10412771 |                                     |                           |                                |                               | 1.101 | 1.32  | 0.227237  | 0.498001  |
| 3987 | 10452643 | <a href="#">NM_026064</a>           | <a href="#">67268</a>     | RIKEN cDNA 2900073G15 gene     | <a href="#">2900073G15Rik</a> | 1.101 | 1.278 | 0.240768  | 0.513737  |
| 3988 | 10380665 | <a href="#">NM_008266</a>           | <a href="#">15407</a>     | homeo box B1                   | <a href="#">Hoxb1</a>         | 1.101 | 1.496 | 0.177081  | 0.431359  |
| 3989 | 10588403 | <a href="#">NM_053159</a>           | <a href="#">94062</a>     | mitochondrial ribosomal protei | <a href="#">Mrpl3</a>         | 1.101 | 0.482 | 0.643945  | 0.838914  |
| 3990 | 10400405 | <a href="#">NM_010907</a>           | <a href="#">18035</a>     | nuclear factor of kappa light  | <a href="#">Nfkbia</a>        | 1.101 | 1.586 | 0.155492  | 0.400991  |
| 3991 | 10526319 | <a href="#">NM_011714</a>           | <a href="#">22385</a>     | bromodomain adjacent to zinc f | <a href="#">Baz1b</a>         | 1.1   | 1.804 | 0.113025  | 0.333083  |
| 3992 | 10517517 | <a href="#">NM_007572</a>           | <a href="#">12259</a>     | complement component 1, q subc | <a href="#">C1qa</a>          | 1.1   | 1.466 | 0.184764  | 0.442328  |
| 3993 | 10407222 | <a href="#">NM_172594</a>           | <a href="#">218629</a>    | DEAH (Asp-Glu-Ala-His) box pol | <a href="#">Dhx29</a>         | 1.1   | 1.037 | 0.333232  | 0.609187  |
| 3994 | 10592790 | <a href="#">NM_172162</a>           | <a href="#">102423</a>    | MBD2-interacting zinc finger   | <a href="#">Mizf</a>          | 1.1   | 1.455 | 0.187871  | 0.446188  |
| 3995 | 10485344 | <a href="#">NM_007466</a>           | <a href="#">11800</a>     | apoptosis inhibitor 5          | <a href="#">Api5</a>          | 1.1   | 0.804 | 0.447029  | 0.704723  |
| 3996 | 10436708 | <a href="#">NM_024258</a>           | <a href="#">74112</a>     | ubiquitin specific peptidase 1 | <a href="#">Usp16</a>         | 1.1   | 1.19  | 0.271618  | 0.546245  |
| 3997 | 10516020 |                                     |                           |                                |                               | 1.1   | 1.101 | 0.306386  | 0.582911  |
| 3998 | 10541496 | <a href="#">NM_015776</a>           | <a href="#">50530</a>     | microfibrillar associated prot | <a href="#">Mfap5</a>         | 1.1   | 3.101 | 0.0166523 | 0.0970498 |
| 3999 | 10373606 | <a href="#">NM_001085477</a>        | <a href="#">544748</a>    | olfactory receptor 765         | <a href="#">Olfr765</a>       | 1.1   | 0.894 | 0.399972  | 0.665979  |
| 4000 | 10549388 | <a href="#">NM_008970</a>           | <a href="#">19227</a>     | parathyroid hormone-like pepti | <a href="#">Pthlh</a>         | 1.1   | 1.792 | 0.114996  | 0.337282  |
| 4001 | 10594774 | <a href="#">NM_007630</a>           | <a href="#">12442</a>     | cyclin B2                      | <a href="#">Ccnb2</a>         | 1.1   | 1.844 | 0.106426  | 0.321744  |
| 4002 | 10442495 | <a href="#">NM_013630</a>           | <a href="#">18763</a>     | polycystic kidney disease 1 ho | <a href="#">Pkd1</a>          | 1.1   | 1.62  | 0.147922  | 0.390128  |
| 4003 | 10572679 | <a href="#">NM_146211</a>           | <a href="#">234407</a>    | glycosyltransferase 25 domain  | <a href="#">Glt25d1</a>       | 1.1   | 1.185 | 0.273483  | 0.54821   |
| 4004 | 10453553 | <a href="#">ENSMUST000000084298</a> | <a href="#">100038746</a> | hypothetical LOC100038746      | <a href="#">LOC100038746</a>  | 1.1   | 1.216 | 0.262284  | 0.536754  |
| 4005 | 10510056 | <a href="#">NM_031377</a>           | <a href="#">83491</a>     | preferentially expressed antig | <a href="#">Pram11</a>        | 1.1   | 2.055 | 0.0778193 | 0.265345  |
| 4006 | 10430593 | <a href="#">NM_028792</a>           | <a href="#">74158</a>     | Josephin domain containing 1   | <a href="#">Josd1</a>         | 1.1   | 0.652 | 0.534683  | 0.768432  |
| 4007 | 10437655 | <a href="#">BC068110</a>            | <a href="#">383103</a>    | cDNA sequence BC068110         | <a href="#">BC068110</a>      | 1.1   | 0.772 | 0.464592  | 0.718344  |
| 4008 | 10396712 | <a href="#">NM_016893</a>           | <a href="#">53618</a>     | fucosyltransferase 8           | <a href="#">Fut8</a>          | 1.1   | 0.888 | 0.403414  | 0.668494  |
| 4009 | 10589565 | <a href="#">NM_001081340</a>        | <a href="#">235626</a>    | SET domain containing 2        | <a href="#">Setd2</a>         | 1.1   | 1.927 | 0.0940931 | 0.297785  |
| 4010 | 10514195 | <a href="#">NM_001081096</a>        | <a href="#">75811</a>     | RIKEN cDNA 4930500009 gene     | <a href="#">4930500009Rik</a> | 1.1   | 1.817 | 0.110807  | 0.329565  |
| 4011 | 10584710 | <a href="#">NM_010436</a>           | <a href="#">15270</a>     | H2A histone family, member X   | <a href="#">H2afx</a>         | 1.1   | 1.152 | 0.286048  | 0.561602  |
| 4012 | 10534303 | <a href="#">NM_020044</a>           | <a href="#">56743</a>     | linker for activation of T cel | <a href="#">Lat2</a>          | 1.1   | 1.938 | 0.0925892 | 0.294729  |
| 4013 | 10503109 | <a href="#">NM_181391</a>           | <a href="#">66433</a>     | coiled-coil-helix-coiled-coil- | <a href="#">Chchd7</a>        | 1.1   | 0.685 | 0.514638  | 0.754767  |
| 4014 | 10420155 | <a href="#">NM_026819</a>           | <a href="#">52585</a>     | dehydrogenase/reductase (SDR f | <a href="#">Dhrs1</a>         | 1.1   | 0.535 | 0.608493  | 0.817718  |
| 4015 | 10516259 | <a href="#">NM_175223</a>           | <a href="#">75563</a>     | dynein, axonemal, light interm | <a href="#">Dnali1</a>        | 1.1   | 1.36  | 0.21492   | 0.481846  |
| 4016 | 10355138 |                                     |                           |                                |                               | 1.1   | 0.737 | 0.484584  | 0.733146  |
| 4017 | 10501433 | <a href="#">NM_177091</a>           | <a href="#">320181</a>    | fibronectin type III domain co | <a href="#">Fndc7</a>         | 1.099 | 1.685 | 0.134672  | 0.369832  |
| 4018 | 10585099 | <a href="#">NM_175482</a>           | <a href="#">235323</a>    | ubiquitin specific peptidase 2 | <a href="#">Usp28</a>         | 1.099 | 1.373 | 0.210889  | 0.476393  |
| 4019 | 10579296 | <a href="#">BC028495</a>            | <a href="#">66462</a>     | RIKEN cDNA 28104281I5 gene     | <a href="#">28104281I5Rik</a> | 1.099 | 0.604 | 0.564619  | 0.790721  |
| 4020 | 10461553 | <a href="#">ENSMUST000000087947</a> | <a href="#">403202</a>    | RIKEN cDNA A430093F15 gene     | <a href="#">A430093F15Rik</a> | 1.099 | 1.642 | 0.14343   | 0.384029  |
| 4021 | 10401181 | <a href="#">NM_021557</a>           | <a href="#">17252</a>     | retinol dehydrogenase 11       | <a href="#">Rdh11</a>         | 1.099 | 0.579 | 0.580152  | 0.799396  |
| 4022 | 10473919 | <a href="#">NM_029437</a>           | <a href="#">75786</a>     | cytoskeleton associated protei | <a href="#">Ckap5</a>         | 1.099 | 1.552 | 0.163309  | 0.412349  |
| 4023 | 10377416 | <a href="#">NM_028005</a>           | <a href="#">71923</a>     | RIKEN cDNA 2310047M10 gene     | <a href="#">2310047M10Rik</a> | 1.099 | 1.892 | 0.0992081 | 0.307631  |
| 4024 | 10361065 | <a href="#">NM_001081259</a>        | <a href="#">226844</a>    | feline leukemia virus subgroup | <a href="#">Flvr1</a>         | 1.099 | 1.317 | 0.228191  | 0.499211  |
| 4025 | 10436678 | <a href="#">NM_008065</a>           | <a href="#">14390</a>     | GA repeat binding protein, alp | <a href="#">Gabpa</a>         | 1.099 | 1.049 | 0.327981  | 0.604237  |
| 4026 | 10557793 | <a href="#">NM_009294</a>           | <a href="#">20909</a>     | syntaxin 4A (placental)        | <a href="#">Stx4a</a>         | 1.099 | 1.035 | 0.334284  | 0.609879  |
| 4027 | 10477475 | <a href="#">NM_011126</a>           | <a href="#">18843</a>     | palate, lung, and nasal epithe | <a href="#">Plunc</a>         | 1.099 | 1.537 | 0.166926  | 0.417889  |
| 4028 | 10424909 | <a href="#">NM_008296</a>           | <a href="#">15499</a>     | heat shock factor 1            | <a href="#">Hsf1</a>          | 1.099 | 0.711 | 0.499714  | 0.742878  |
| 4029 | 10482486 | <a href="#">BC002253</a>            | <a href="#">109129</a>    | RIKEN cDNA 2010311D03 gene     | <a href="#">2010311D03Rik</a> | 1.099 | 0.995 | 0.352034  | 0.625181  |
| 4030 | 10556442 | <a href="#">NM_009346</a>           | <a href="#">21676</a>     | TEA domain family member 1     | <a href="#">Tead1</a>         | 1.099 | 1.087 | 0.312136  | 0.58848   |
| 4031 | 10604333 | <a href="#">NM_178739</a>           | <a href="#">245404</a>    | WD repeat domain 40B           | <a href="#">Wdr40b</a>        | 1.099 | 1.104 | 0.305231  | 0.581633  |

|      |          |                                    |                        |                                 |                               |       |       |           |          |
|------|----------|------------------------------------|------------------------|---------------------------------|-------------------------------|-------|-------|-----------|----------|
| 4032 | 10381619 | <a href="#">NM_001110778</a>       | <a href="#">11488</a>  | a disintegrin and metalloprotei | <a href="#">Adam11</a>        | 1.099 | 1.028 | 0.337082  | 0.612729 |
| 4033 | 10497842 | <a href="#">NM_027810</a>          | <a href="#">71492</a>  | Bardet-Biedl syndrome 7         | <a href="#">Bbs7</a>          | 1.099 | 1.232 | 0.256613  | 0.530799 |
| 4034 | 10528664 | <a href="#">NM_025891</a>          | <a href="#">66993</a>  | SWI/SNF related, matrix associ  | <a href="#">Smardc3</a>       | 1.099 | 1.28  | 0.240031  | 0.513113 |
| 4035 | 10369620 | <a href="#">NM_028197</a>          | <a href="#">72320</a>  | RIKEN cDNA 2510003E04 gene      | <a href="#">2510003E04Rik</a> | 1.099 | 0.998 | 0.350546  | 0.624042 |
| 4036 | 10537638 | <a href="#">NM_001038996</a>       | <a href="#">436522</a> | trypsin 10                      | <a href="#">Try10</a>         | 1.099 | 1.175 | 0.277403  | 0.552507 |
| 4037 | 10574939 | <a href="#">NM_173432</a>          | <a href="#">244631</a> | protein serine kinase H1        | <a href="#">Pskh1</a>         | 1.099 | 1.298 | 0.234303  | 0.50547  |
| 4038 | 10530287 | <a href="#">NM_009686</a>          | <a href="#">11787</a>  | amyloid beta (A4) precursor pr  | <a href="#">Apbb2</a>         | 1.099 | 0.288 | 0.78109   | 0.911042 |
| 4039 | 10486956 | <a href="#">NM_177610</a>          | <a href="#">214593</a> | dual oxidase 2                  | <a href="#">Duox2</a>         | 1.099 | 1.886 | 0.100002  | 0.309109 |
| 4040 | 10423090 | <a href="#">NM_008537</a>          | <a href="#">17117</a>  | alpha-methylacyl-CoA racemase   | <a href="#">Amacr</a>         | 1.099 | 1.372 | 0.21107   | 0.476598 |
| 4041 | 10357946 | <a href="#">NM_001081307</a>       | <a href="#">329251</a> | protein phosphatase 1, regulat  | <a href="#">Ppp1r12b</a>      | 1.099 | 1.287 | 0.237911  | 0.510297 |
| 4042 | 10474207 | <a href="#">NM_212433</a>          | <a href="#">57443</a>  | F-box protein 3                 | <a href="#">Fbxo3</a>         | 1.099 | 0.804 | 0.447003  | 0.704723 |
| 4043 | 10535898 | <a href="#">NM_011937</a>          | <a href="#">26384</a>  | glucosamine-6-phosphate deamin  | <a href="#">Gnpda1</a>        | 1.099 | 0.895 | 0.39979   | 0.66597  |
| 4044 | 10505884 | <a href="#">NM_206871</a>          | <a href="#">15969</a>  | interferon alpha 6              | <a href="#">Ifna6</a>         | 1.099 | 1.737 | 0.124608  | 0.35351  |
| 4045 | 10473754 | <a href="#">NM_025991</a>          | <a href="#">67136</a>  | kelch repeat and BTB (POZ) dom  | <a href="#">Kbtbd4</a>        | 1.099 | 0.824 | 0.436168  | 0.696174 |
| 4046 | 10365574 | <a href="#">NM_029971</a>          | <a href="#">110312</a> | pro-melanin-concentrating horm  | <a href="#">Pmch</a>          | 1.099 | 1.017 | 0.341942  | 0.616342 |
| 4047 | 10406385 | <a href="#">ENSMUST00000091459</a> | <a href="#">68675</a>  | RIKEN cDNA 1110033M05 gene      | <a href="#">1110033M05Rik</a> | 1.099 | 0.618 | 0.555559  | 0.784214 |
| 4048 | 10563434 |                                    |                        |                                 |                               | 1.098 | 1.123 | 0.297479  | 0.573687 |
| 4049 | 10539741 | <a href="#">NM_001040106</a>       | <a href="#">269774</a> | AP2 associated kinase 1         | <a href="#">Aak1</a>          | 1.098 | 1.791 | 0.115187  | 0.337402 |
| 4050 | 10551570 | <a href="#">NM_022432</a>          | <a href="#">64383</a>  | sirtuin 2 (silent mating type   | <a href="#">Sirt2</a>         | 1.098 | 1.214 | 0.26309   | 0.537778 |
| 4051 | 10529252 | <a href="#">AY372183</a>           | <a href="#">215476</a> | RIKEN cDNA C330019G07 gene      | <a href="#">C330019G07Rik</a> | 1.098 | 1.129 | 0.295007  | 0.571264 |
| 4052 | 10456579 | <a href="#">NM_001039214</a>       | <a href="#">240396</a> | mex3 homolog C (C. elegans)     | <a href="#">Mex3c</a>         | 1.098 | 1.124 | 0.297096  | 0.573626 |
| 4053 | 10433008 | <a href="#">NM_009582</a>          | <a href="#">26404</a>  | mitogen-activated protein kina  | <a href="#">Map3k12</a>       | 1.098 | 1.687 | 0.134245  | 0.369304 |
| 4054 | 10437330 | <a href="#">ENSMUST00000100216</a> | <a href="#">12914</a>  | CREB binding protein            | <a href="#">Crebbp</a>        | 1.098 | 0.824 | 0.436371  | 0.696296 |
| 4055 | 10584057 | <a href="#">NM_001115130</a>       | <a href="#">235132</a> | zinc finger and BTB domain con  | <a href="#">Zbtb44</a>        | 1.098 | 1.391 | 0.205544  | 0.46918  |
| 4056 | 10348864 |                                    |                        |                                 |                               | 1.098 | 1.149 | 0.287053  | 0.562871 |
| 4057 | 10428511 | <a href="#">NM_001081391</a>       | <a href="#">239420</a> | CUB and Sushi multiple domains  | <a href="#">Csmc3</a>         | 1.098 | 0.78  | 0.460423  | 0.715034 |
| 4058 | 10491064 |                                    |                        |                                 |                               | 1.098 | 1.431 | 0.194337  | 0.454391 |
| 4059 | 10360248 | <a href="#">ENSMUST00000111243</a> | <a href="#">27222</a>  | ATPase, Na+/K+ transporting, a  | <a href="#">Atp1a4</a>        | 1.098 | 1.746 | 0.123095  | 0.351101 |
| 4060 | 10433292 | <a href="#">NM_010443</a>          | <a href="#">15369</a>  | heme oxygenase (decycling) 2    | <a href="#">Hmox2</a>         | 1.098 | 1.713 | 0.129172  | 0.360384 |
| 4061 | 10436588 | <a href="#">AK048031</a>           | <a href="#">77994</a>  | RIKEN cDNA 2810055G20 gene      | <a href="#">2810055G20Rik</a> | 1.098 | 1.815 | 0.11118   | 0.329929 |
| 4062 | 10501121 | <a href="#">NM_153563</a>          | <a href="#">229707</a> | RIKEN cDNA 6330569M22 gene      | <a href="#">6330569M22Rik</a> | 1.098 | 1.594 | 0.153603  | 0.398105 |
| 4063 | 10547597 | <a href="#">NM_007905</a>          | <a href="#">13619</a>  | polyhomeotic-like 1 (Drosophil  | <a href="#">Phc1</a>          | 1.098 | 0.668 | 0.525036  | 0.761313 |
| 4064 | 10481474 | <a href="#">NM_007760</a>          | <a href="#">12908</a>  | carnitine acetyltransferase     | <a href="#">Crat</a>          | 1.098 | 1.426 | 0.195688  | 0.456039 |
| 4065 | 10451104 | <a href="#">NM_001013749</a>       | <a href="#">210573</a> | transmembrane protein 151B      | <a href="#">Tmem151b</a>      | 1.098 | 0.709 | 0.500726  | 0.743808 |
| 4066 | 10548745 | <a href="#">NM_008157</a>          | <a href="#">14760</a>  | G protein-coupled receptor 19   | <a href="#">Gpr19</a>         | 1.098 | 1.86  | 0.104026  | 0.317208 |
| 4067 | 10596277 | <a href="#">ENSMUST00000060084</a> | <a href="#">235567</a> | DnaJ (Hsp40) homolog, subfamil  | <a href="#">Dnajc13</a>       | 1.098 | 1.309 | 0.230548  | 0.501476 |
| 4068 | 10493530 | <a href="#">NM_026869</a>          | <a href="#">68911</a>  | pygopus 2                       | <a href="#">Pygo2</a>         | 1.098 | 1.28  | 0.240287  | 0.513351 |
| 4069 | 10554463 | <a href="#">NM_026812</a>          | <a href="#">68695</a>  | HD domain containing 3          | <a href="#">Hddc3</a>         | 1.098 | 0.727 | 0.490284  | 0.737262 |
| 4070 | 10369388 | <a href="#">NM_029770</a>          | <a href="#">107449</a> | unc-5 homolog B (C. elegans)    | <a href="#">Unc5b</a>         | 1.098 | 1.56  | 0.161511  | 0.409658 |
| 4071 | 10497920 | <a href="#">NM_001033198</a>       | <a href="#">99696</a>  | ankrin repeat domain 50         | <a href="#">Ankrd50</a>       | 1.098 | 1.266 | 0.244848  | 0.518017 |
| 4072 | 10518642 | <a href="#">NM_022022</a>          | <a href="#">63958</a>  | ubiquitination factor E4B, UFD  | <a href="#">Ube4b</a>         | 1.097 | 1.315 | 0.228921  | 0.499975 |
| 4073 | 10508697 | <a href="#">NM_020587</a>          | <a href="#">57317</a>  | splicing factor, arginine/seri  | <a href="#">Sfrs4</a>         | 1.097 | 1.425 | 0.196099  | 0.45647  |
| 4074 | 10565596 |                                    |                        |                                 |                               | 1.097 | 1.607 | 0.150904  | 0.394549 |
| 4075 | 10545827 | <a href="#">NM_001003955</a>       | <a href="#">52055</a>  | RAB11 family interacting prote  | <a href="#">Rab11fip5</a>     | 1.097 | 1.896 | 0.0984993 | 0.30641  |
| 4076 | 10456120 | <a href="#">NM_146087</a>          | <a href="#">93687</a>  | casein kinase 1, alpha 1        | <a href="#">Csnk1a1</a>       | 1.097 | 1.747 | 0.12294   | 0.350793 |
| 4077 | 10476545 | <a href="#">NM_175467</a>          | <a href="#">228677</a> | serine palmitoyltransferase, 1  | <a href="#">Sptlc3</a>        | 1.097 | 1.616 | 0.148862  | 0.391099 |
| 4078 | 10484728 | <a href="#">NM_146294</a>          | <a href="#">258291</a> | olfactory receptor 1167         | <a href="#">Olfr1167</a>      | 1.097 | 0.384 | 0.712027  | 0.873823 |
| 4079 | 10579079 | <a href="#">NM_001039967</a>       | <a href="#">66869</a>  | RIKEN cDNA 1200003107 gene      | <a href="#">1200003107Rik</a> | 1.097 | 0.984 | 0.356859  | 0.629197 |
| 4080 | 10542834 |                                    |                        |                                 |                               | 1.097 | 0.173 | 0.867769  | 0.947048 |
| 4081 | 10468802 | <a href="#">BC061459</a>           | <a href="#">76539</a>  | DNA segment, Chr 19, ERATO Doi  | <a href="#">D19ErtD737e</a>   | 1.097 | 2.006 | 0.0836697 | 0.277117 |
| 4082 | 10443527 | <a href="#">NM_008842</a>          | <a href="#">18712</a>  | proviral integration site 1     | <a href="#">Pim1</a>          | 1.097 | 1.882 | 0.100664  | 0.310496 |

|      |          |                                    |                           |                                       |                               |       |       |           |          |
|------|----------|------------------------------------|---------------------------|---------------------------------------|-------------------------------|-------|-------|-----------|----------|
| 4083 | 10555425 | <a href="#">BC079886</a>           | <a href="#">319604</a>    | RIKEN cDNA B930006L02 gene            | <a href="#">B930006L02Rik</a> | 1.097 | 1.068 | 0.319791  | 0.596635 |
| 4084 | 10378668 | <a href="#">NM_008850</a>          | <a href="#">18738</a>     | phosphatidylinositol transfer         | <a href="#">Pitpna</a>        | 1.097 | 0.912 | 0.391032  | 0.659412 |
| 4085 | 10369911 | <a href="#">BC024851</a>           | <a href="#">68778</a>     | RIKEN cDNA 1110038D17 gene            | <a href="#">1110038D17Rik</a> | 1.097 | 0.827 | 0.434963  | 0.695306 |
| 4086 | 10372417 | <a href="#">NM_001033474</a>       | <a href="#">382423</a>    | RIKEN cDNA 4921506J03 gene            | <a href="#">4921506J03Rik</a> | 1.097 | 1.363 | 0.213966  | 0.480314 |
| 4087 | 10435057 | <a href="#">NM_009981</a>          | <a href="#">13026</a>     | phosphate cytidyltransferase          | <a href="#">Pcyl1a</a>        | 1.097 | 0.232 | 0.823254  | 0.929358 |
| 4088 | 10541636 | <a href="#">NM_019917</a>          | <a href="#">56552</a>     | vomer nasal 2, receptor 26            | <a href="#">Vmn2r26</a>       | 1.097 | 1.468 | 0.184352  | 0.441942 |
| 4089 | 10415844 | <a href="#">NM_007798</a>          | <a href="#">13030</a>     | cathepsin B                           | <a href="#">Ctsb</a>          | 1.097 | 1.314 | 0.228966  | 0.499975 |
| 4090 | 10472916 | <a href="#">NM_025866</a>          | <a href="#">66953</a>     | cell division cycle associated        | <a href="#">Cdca7</a>         | 1.097 | 1.2   | 0.268145  | 0.542786 |
| 4091 | 10368907 | <a href="#">NM_152229</a>          | <a href="#">21907</a>     | nuclear receptor subfamily 2,         | <a href="#">Nr2e1</a>         | 1.097 | 1.1   | 0.306569  | 0.58301  |
| 4092 | 10557233 | <a href="#">NM_144925</a>          | <a href="#">233833</a>    | trinucleotide repeat containin        | <a href="#">Tnrc6a</a>        | 1.097 | 1.992 | 0.0853819 | 0.280546 |
| 4093 | 10448004 | <a href="#">NM_024250</a>          | <a href="#">72057</a>     | PHD finger protein 10                 | <a href="#">Phf10</a>         | 1.096 | 1.021 | 0.340254  | 0.61558  |
| 4094 | 10476569 | <a href="#">NM_027093</a>          | <a href="#">69487</a>     | RIKEN cDNA 2310003L22 gene            | <a href="#">2310003L22Rik</a> | 1.096 | 0.979 | 0.359102  | 0.631213 |
| 4095 | 10544062 | <a href="#">ENSMUST00000078942</a> | <a href="#">330286</a>    | RIKEN cDNA D630045J12 gene            | <a href="#">D630045J12Rik</a> | 1.096 | 1.51  | 0.173655  | 0.426449 |
| 4096 | 10577508 | <a href="#">NM_001004140</a>       | <a href="#">80986</a>     | cytoskeleton associated protei        | <a href="#">Ckap2</a>         | 1.096 | 1.113 | 0.301607  | 0.577839 |
| 4097 | 10577067 |                                    |                           |                                       |                               | 1.096 | 1.54  | 0.16624   | 0.41711  |
| 4098 | 10496813 | <a href="#">NM_028836</a>          | <a href="#">74245</a>     | chitinase, di-N-acetyl-               | <a href="#">Ctbs</a>          | 1.096 | 0.837 | 0.429698  | 0.690652 |
| 4099 | 10396699 | <a href="#">NM_145927</a>          | <a href="#">110606</a>    | farnesyltransferase, CAAX box,        | <a href="#">Fntb</a>          | 1.096 | 0.983 | 0.357238  | 0.62961  |
| 4100 | 10455259 | <a href="#">NM_175164</a>          | <a href="#">71302</a>     | Rho GTPase activating protein         | <a href="#">Arhgap26</a>      | 1.096 | 0.987 | 0.355369  | 0.628032 |
| 4101 | 10510602 | <a href="#">ENSMUST00000094445</a> | <a href="#">100041960</a> | RIKEN cDNA 9230110K08 gene            | <a href="#">9230110K08Rik</a> | 1.096 | 1.384 | 0.207663  | 0.472138 |
| 4102 | 10424686 | <a href="#">BC025446</a>           | <a href="#">223631</a>    | cDNA sequence BC025446                | <a href="#">BC025446</a>      | 1.096 | 1.36  | 0.214886  | 0.481846 |
| 4103 | 10518674 | <a href="#">NM_022020</a>          | <a href="#">63954</a>     | retinol binding protein 7, cel        | <a href="#">Rbp7</a>          | 1.096 | 1.529 | 0.168975  | 0.420416 |
| 4104 | 10356293 | <a href="#">BC052931</a>           | <a href="#">319997</a>    | RIKEN cDNA A630001G21 gene            | <a href="#">A630001G21Rik</a> | 1.096 | 1.568 | 0.159682  | 0.407016 |
| 4105 | 10391043 | <a href="#">NM_201255</a>          | <a href="#">107656</a>    | keratin 9                             | <a href="#">Krt9</a>          | 1.096 | 1.361 | 0.214638  | 0.481467 |
| 4106 | 10533095 | <a href="#">NM_172721</a>          | <a href="#">231672</a>    | F-box and WD-40 domain protein        | <a href="#">Fbxw8</a>         | 1.096 | 0.651 | 0.535506  | 0.769059 |
| 4107 | 10507461 |                                    |                           |                                       |                               | 1.096 | 0.649 | 0.536512  | 0.769659 |
| 4108 | 10455092 | <a href="#">NM_053137</a>          | <a href="#">93883</a>     | protocadherin beta 12                 | <a href="#">Pcdhb12</a>       | 1.096 | 0.115 | 0.911554  | 0.964659 |
| 4109 | 10517287 | <a href="#">NM_207237</a>          | <a href="#">230815</a>    | mannosidase, alpha, class 1C,         | <a href="#">Man1c1</a>        | 1.096 | 1.269 | 0.244006  | 0.517064 |
| 4110 | 10591630 | <a href="#">NM_177030</a>          | <a href="#">319899</a>    | dedicator of cytokinesis 6            | <a href="#">Dock6</a>         | 1.096 | 0.809 | 0.444566  | 0.70306  |
| 4111 | 10416269 | <a href="#">ENSMUST00000078149</a> | <a href="#">66440</a>     | cell division cycle 26                | <a href="#">Cdc26</a>         | 1.096 | 0.241 | 0.816562  | 0.926829 |
| 4112 | 10497381 | <a href="#">NM_007825</a>          | <a href="#">13123</a>     | cytochrome P450, family 7, sub        | <a href="#">Cyp7b1</a>        | 1.096 | 0.397 | 0.703168  | 0.869747 |
| 4113 | 10413943 | <a href="#">NM_026253</a>          | <a href="#">67580</a>     | leucine rich repeat containing        | <a href="#">Lrrc18</a>        | 1.096 | 1.657 | 0.140142  | 0.378727 |
| 4114 | 10606880 | <a href="#">NM_010297</a>          | <a href="#">14657</a>     | glycine receptor, alpha 4 subu        | <a href="#">Glr4</a>          | 1.096 | 1.125 | 0.2968    | 0.573371 |
| 4115 | 10361375 | <a href="#">NM_025995</a>          | <a href="#">67141</a>     | F-box protein 5                       | <a href="#">Fbxo5</a>         | 1.096 | 1.072 | 0.31831   | 0.595501 |
| 4116 | 10372716 | <a href="#">NM_024457</a>          | <a href="#">215449</a>    | RAS related protein 1b                | <a href="#">Rap1b</a>         | 1.096 | 1.583 | 0.156241  | 0.402137 |
| 4117 | 10367931 | <a href="#">NM_181470</a>          | <a href="#">353258</a>    | LTV1 homolog ( <i>S. cerevisiae</i> ) | <a href="#">Ltv1</a>          | 1.096 | 1.515 | 0.172183  | 0.424316 |
| 4118 | 10580202 | <a href="#">NM_201227</a>          | <a href="#">23863</a>     | DAN domain family, member 5           | <a href="#">Dand5</a>         | 1.096 | 0.769 | 0.466316  | 0.719571 |
| 4119 | 10375083 | <a href="#">NM_009288</a>          | <a href="#">20868</a>     | serine/threonine kinase 10            | <a href="#">Stk10</a>         | 1.096 | 1.555 | 0.162751  | 0.411428 |
| 4120 | 10519052 | <a href="#">BC030453</a>           | <a href="#">66469</a>     | RIKEN cDNA 2810405K02 gene            | <a href="#">2810405K02Rik</a> | 1.096 | 0.535 | 0.608536  | 0.817724 |
| 4121 | 10516867 | <a href="#">NM_001122992</a>       | <a href="#">56809</a>     | glucocorticoid modulatory elem        | <a href="#">Gmeb1</a>         | 1.096 | 1.373 | 0.210884  | 0.476393 |
| 4122 | 10512574 | <a href="#">NM_172692</a>          | <a href="#">230101</a>    | glucosidase beta 2                    | <a href="#">Gba2</a>          | 1.095 | 1.041 | 0.33135   | 0.607848 |
| 4123 | 10565570 | <a href="#">DQ400346</a>           | <a href="#">74041</a>     | RIKEN cDNA 4632434I11 gene            | <a href="#">4632434I11Rik</a> | 1.095 | 0.319 | 0.7585    | 0.898805 |
| 4124 | 10596988 | <a href="#">ENSMUST00000084990</a> | <a href="#">665413</a>    | predicted gene, EG665413              | <a href="#">EG665413</a>      | 1.095 | 1.481 | 0.181019  | 0.436926 |
| 4125 | 10481128 | <a href="#">NM_011513</a>          | <a href="#">20933</a>     | mediator complex subunit 22           | <a href="#">Med22</a>         | 1.095 | 0.842 | 0.426854  | 0.688211 |
| 4126 | 10573483 | <a href="#">NM_011563</a>          | <a href="#">21672</a>     | peroxiredoxin 2                       | <a href="#">Prdx2</a>         | 1.095 | 0.632 | 0.546906  | 0.778024 |
| 4127 | 10465209 | <a href="#">NM_181452</a>          | <a href="#">17826</a>     | mammary tumor virus receptor 2        | <a href="#">Mtvr2</a>         | 1.095 | 1.343 | 0.219857  | 0.488612 |
| 4128 | 10503876 | <a href="#">NM_177774</a>          | <a href="#">272009</a>    | serine-arginine repressor prot        | <a href="#">RP23-12124.6</a>  | 1.095 | 2.01  | 0.0832281 | 0.27639  |
| 4129 | 10580365 | <a href="#">BC040087</a>           | <a href="#">66714</a>     | RIKEN cDNA 4921524J17 gene            | <a href="#">4921524J17Rik</a> | 1.095 | 0.58  | 0.579618  | 0.799025 |
| 4130 | 10434804 |                                    |                           |                                       |                               | 1.095 | 0.468 | 0.653422  | 0.844695 |
| 4131 | 10606513 | <a href="#">NM_018818</a>          | <a href="#">12662</a>     | choroideremia                         | <a href="#">Chm</a>           | 1.095 | 0.843 | 0.426329  | 0.687967 |
| 4132 | 10566272 | <a href="#">NM_008221</a>          | <a href="#">15135</a>     | hemoglobin Y, beta-like embryo        | <a href="#">Hbb-y</a>         | 1.095 | 2.051 | 0.0782167 | 0.266113 |
| 4133 | 10607933 | <a href="#">NM_008222</a>          | <a href="#">15159</a>     | holocytochrome c synthetase           | <a href="#">Hccs</a>          | 1.095 | 1.311 | 0.230065  | 0.501055 |

|      |          |                                    |                        |                                |                                    |       |       |           |          |
|------|----------|------------------------------------|------------------------|--------------------------------|------------------------------------|-------|-------|-----------|----------|
| 4134 | 10368550 | <a href="#">NM_018747</a>          | <a href="#">432442</a> | A kinase (PRKA) anchor protein | <a href="#">Akap7</a>              | 1.095 | 1.264 | 0.245507  | 0.518491 |
| 4135 | 10438478 | <a href="#">NM_013790</a>          | <a href="#">27416</a>  | ATP-binding cassette, sub-fami | <a href="#">Abcc5</a>              | 1.095 | 1.628 | 0.146312  | 0.38806  |
| 4136 | 10458540 | <a href="#">NM_017378</a>          | <a href="#">53601</a>  | protocadherin 12               | <a href="#">Pcdh12</a>             | 1.095 | 1.96  | 0.0896511 | 0.289031 |
| 4137 | 10399924 | <a href="#">NM_020272</a>          | <a href="#">30955</a>  | phosphoinositide-3-kinase, cat | <a href="#">Pik3cg</a>             | 1.095 | 1.663 | 0.138932  | 0.377005 |
| 4138 | 10559248 | <a href="#">NM_020286</a>          | <a href="#">27027</a>  | tetraspanin 32                 | <a href="#">Tspan32</a>            | 1.095 | 1.218 | 0.261513  | 0.536057 |
| 4139 | 10355706 | <a href="#">NM_010544</a>          | <a href="#">16147</a>  | Indian hedgehog                | <a href="#">Ihh</a>                | 1.095 | 1.574 | 0.158222  | 0.405115 |
| 4140 | 10425936 | <a href="#">BC112373</a>           | <a href="#">67747</a>  | RIB43A domain with coiled-coil | <a href="#">Ribe2</a>              | 1.095 | 2.103 | 0.0723622 | 0.253324 |
| 4141 | 10437673 | <a href="#">NM_013694</a>          | <a href="#">21959</a>  | transition protein 2           | <a href="#">Tnp2</a>               | 1.095 | 0.94  | 0.377485  | 0.647352 |
| 4142 | 10430686 | <a href="#">ENSMUST00000096347</a> | <a href="#">383075</a> | ENTH domain containing 1       | <a href="#">Enthd1</a>             | 1.095 | 1.159 | 0.283406  | 0.558717 |
| 4143 | 10602964 |                                    |                        |                                |                                    | 1.095 | 1.273 | 0.242455  | 0.515377 |
| 4144 | 10491605 | <a href="#">ENSMUST00000057272</a> | <a href="#">229227</a> | RIKEN cDNA 4932438A13 gene     | <a href="#">4932438A13Rik</a>      | 1.095 | 0.512 | 0.624234  | 0.828379 |
| 4145 | 10489092 | <a href="#">ENSMUST00000069098</a> | <a href="#">320706</a> | RIKEN cDNA 9830001H06 gene     | <a href="#">9830001H06Rik</a>      | 1.095 | 1.583 | 0.156144  | 0.401989 |
| 4146 | 10593430 | <a href="#">NM_178710</a>          | <a href="#">235344</a> | SNF1-like kinase 2             | <a href="#">Snf1lk2</a>            | 1.095 | 1.807 | 0.112453  | 0.332128 |
| 4147 | 10409767 | <a href="#">NM_027307</a>          | <a href="#">105348</a> | golgi membrane protein 1       | <a href="#">Golm1</a>              | 1.095 | 0.983 | 0.357534  | 0.629926 |
| 4148 | 10570008 | <a href="#">AK081065</a>           | <a href="#">791373</a> | predicted gene, ENSMUSG0000005 | <a href="#">ENSMUSG00000053412</a> | 1.095 | 1.025 | 0.33858   | 0.614159 |
| 4149 | 10521731 | <a href="#">NM_019438</a>          | <a href="#">54392</a>  | on-SMC condensin I complex, su | <a href="#">Ncapg</a>              | 1.095 | 1.521 | 0.170831  | 0.42256  |
| 4150 | 10346838 | <a href="#">NM_001081050</a>       | <a href="#">72823</a>  | par-3 partitioning defective 3 | <a href="#">Pard3b</a>             | 1.095 | 1.332 | 0.223428  | 0.493384 |
| 4151 | 10539179 | <a href="#">NM_011036</a>          | <a href="#">18489</a>  | regenerating islet-derived 3 b | <a href="#">Reg3b</a>              | 1.095 | 1.61  | 0.150241  | 0.393399 |
| 4152 | 10474927 | <a href="#">NM_134722</a>          | <a href="#">106582</a> | nurin (nuclear envelope membra | <a href="#">Nrn</a>                | 1.095 | 0.917 | 0.388882  | 0.657381 |
| 4153 | 10536996 | <a href="#">BC060132</a>           | <a href="#">76788</a>  | RIKEN cDNA 2410127E18 gene     | <a href="#">2410127E18Rik</a>      | 1.095 | 0.763 | 0.469688  | 0.721788 |
| 4154 | 10410016 | <a href="#">NM_007985</a>          | <a href="#">14088</a>  | Fanconi anemia, complementatio | <a href="#">Fance</a>              | 1.094 | 1.37  | 0.211939  | 0.477389 |
| 4155 | 10418702 | <a href="#">NM_011894</a>          | <a href="#">24056</a>  | SH3-domain binding protein 5 ( | <a href="#">Sh3bp5</a>             | 1.094 | 1.494 | 0.177638  | 0.43207  |
| 4156 | 10437552 | <a href="#">NM_001033220</a>       | <a href="#">239691</a> | expressed sequence AU021092    | <a href="#">AU021092</a>           | 1.094 | 2.027 | 0.0810913 | 0.271716 |
| 4157 | 10442691 | <a href="#">NM_011930</a>          | <a href="#">26373</a>  | chloride channel 7             | <a href="#">Clcn7</a>              | 1.094 | 1.219 | 0.261252  | 0.535766 |
| 4158 | 10586011 | <a href="#">NM_026235</a>          | <a href="#">67557</a>  | La ribonucleoprotein domain fa | <a href="#">Larp6</a>              | 1.094 | 1.516 | 0.172049  | 0.424165 |
| 4159 | 10493307 |                                    |                        |                                |                                    | 1.094 | 0.758 | 0.472572  | 0.724273 |
| 4160 | 10589587 | <a href="#">NM_001081340</a>       | <a href="#">235626</a> | SET domain containing 2        | <a href="#">Setd2</a>              | 1.094 | 1.401 | 0.202629  | 0.465349 |
| 4161 | 10568294 |                                    |                        |                                |                                    | 1.094 | 0.926 | 0.384298  | 0.653499 |
| 4162 | 10432263 | <a href="#">NM_175232</a>          | <a href="#">76061</a>  | RIKEN cDNA 5830427D03 gene     | <a href="#">5830427D03Rik</a>      | 1.094 | 1.298 | 0.234296  | 0.50547  |
| 4163 | 10479335 | <a href="#">NM_144500</a>          | <a href="#">228983</a> | oxysterol binding protein-like | <a href="#">Osbp12</a>             | 1.094 | 1.632 | 0.145441  | 0.387083 |
| 4164 | 10457071 | <a href="#">NM_025797</a>          | <a href="#">109672</a> | cytochrome b-5                 | <a href="#">Cyb5</a>               | 1.094 | 0.816 | 0.440365  | 0.699292 |
| 4165 | 10488804 | <a href="#">XR_035020</a>          | <a href="#">435692</a> | similar to ribosomal protein L | <a href="#">LOC435692</a>          | 1.094 | 0.572 | 0.584752  | 0.802388 |
| 4166 | 10433589 |                                    |                        |                                |                                    | 1.094 | 2.371 | 0.0485103 | 0.196834 |
| 4167 | 10491522 | <a href="#">AK138522</a>           | <a href="#">654424</a> | RIKEN cDNA A330050B17 gene     | <a href="#">A330050B17Rik</a>      | 1.094 | 1.4   | 0.202992  | 0.465669 |
| 4168 | 10578539 | <a href="#">NM_007450</a>          | <a href="#">11739</a>  | solute carrier family 25 (mito | <a href="#">Slc25a4</a>            | 1.094 | 1.893 | 0.0990356 | 0.307265 |
| 4169 | 10499666 | <a href="#">NM_001081182</a>       | <a href="#">54667</a>  | Atpase, class I, type 8B, memb | <a href="#">Atp8b2</a>             | 1.094 | 1.455 | 0.187669  | 0.44605  |
| 4170 | 10485405 | <a href="#">NM_009851</a>          | <a href="#">12505</a>  | CD44 antigen                   | <a href="#">Cd44</a>               | 1.094 | 2.375 | 0.0482227 | 0.196119 |
| 4171 | 10574151 |                                    |                        |                                |                                    | 1.094 | 1.31  | 0.230323  | 0.501285 |
| 4172 | 10529577 | <a href="#">NM_133724</a>          | <a href="#">117197</a> | cappuccino                     | <a href="#">Cno</a>                | 1.094 | 1.417 | 0.198197  | 0.45902  |
| 4173 | 10494509 | <a href="#">NM_146135</a>          | <a href="#">229615</a> | protein inhibitor of activated | <a href="#">Pias3</a>              | 1.094 | 0.913 | 0.390731  | 0.659209 |
| 4174 | 10365729 | <a href="#">NM_146239</a>          | <a href="#">237459</a> | PCTAIRE-motif protein kinase 2 | <a href="#">Pctk2</a>              | 1.094 | 1.744 | 0.123365  | 0.351451 |
| 4175 | 10439239 | <a href="#">NM_153550</a>          | <a href="#">224132</a> | disrupted in renal carcinoma 2 | <a href="#">Dirc2</a>              | 1.094 | 0.678 | 0.519195  | 0.757488 |
| 4176 | 10571048 | <a href="#">NM_026032</a>          | <a href="#">67207</a>  | LSM1 homolog, U6 small nuclear | <a href="#">Lsm1</a>               | 1.094 | 1.277 | 0.241053  | 0.513985 |
| 4177 | 10480672 | <a href="#">NM_023464</a>          | <a href="#">68475</a>  | Sjogren's syndrome nuclear aut | <a href="#">Ssna1</a>              | 1.094 | 0.473 | 0.650355  | 0.84316  |
| 4178 | 10458560 | <a href="#">NM_010197</a>          | <a href="#">14164</a>  | fibroblast growth factor 1     | <a href="#">Fgf1</a>               | 1.094 | 1.991 | 0.0855124 | 0.280626 |
| 4179 | 10597949 | <a href="#">NM_011731</a>          | <a href="#">22599</a>  | solute carrier family 6 (neuro | <a href="#">Slc6a20b</a>           | 1.094 | 1.291 | 0.236427  | 0.508546 |
| 4180 | 10599880 | <a href="#">NM_198863</a>          | <a href="#">245450</a> | SLIT and NTRK-like family, mem | <a href="#">Slitrk2</a>            | 1.094 | 0.864 | 0.415246  | 0.678399 |
| 4181 | 10355532 | <a href="#">BC052740</a>           | <a href="#">21961</a>  | tensin 1                       | <a href="#">Tns1</a>               | 1.094 | 1.51  | 0.173659  | 0.426449 |
| 4182 | 10363970 | <a href="#">NM_029781</a>          | <a href="#">76877</a>  | RAB36, member RAS oncogene fam | <a href="#">Rab36</a>              | 1.094 | 1.069 | 0.319519  | 0.596487 |
| 4183 | 10589087 | <a href="#">NM_008924</a>          | <a href="#">19087</a>  | protein kinase, cAMP dependent | <a href="#">Prkar2a</a>            | 1.094 | 1.47  | 0.183749  | 0.440966 |
| 4184 | 10565499 | <a href="#">XM_357814</a>          | <a href="#">384719</a> | predicted gene, FG384719       | <a href="#">FG384719</a>           | 1.094 | 0.891 | 0.401812  | 0.667094 |

|      |          |                              |                           |                                  |                                    |       |       |          |          |
|------|----------|------------------------------|---------------------------|----------------------------------|------------------------------------|-------|-------|----------|----------|
| 4185 | 10567049 | <a href="#">NM_033370</a>    | <a href="#">70349</a>     | coatamer protein complex, subu   | <a href="#">Copb1</a>              | 1.093 | 0.775 | 0.463051 | 0.71752  |
| 4186 | 10578933 |                              |                           |                                  |                                    | 1.093 | 1.005 | 0.347306 | 0.621483 |
| 4187 | 10607658 | <a href="#">NM_178256</a>    | <a href="#">194590</a>    | RALBP1 associated Eps domain c   | <a href="#">Reps2</a>              | 1.093 | 0.889 | 0.402667 | 0.667764 |
| 4188 | 10364030 | <a href="#">NM_009630</a>    | <a href="#">11540</a>     | adenosine A2a receptor           | <a href="#">Adora2a</a>            | 1.093 | 1.716 | 0.128594 | 0.359531 |
| 4189 | 10488507 | <a href="#">NM_024465</a>    | <a href="#">76192</a>     | abhydrolase domain containing    | <a href="#">Abhd12</a>             | 1.093 | 0.817 | 0.44011  | 0.69915  |
| 4190 | 10409992 |                              |                           |                                  |                                    | 1.093 | 0.766 | 0.468256 | 0.720616 |
| 4191 | 10380534 | <a href="#">NM_025287</a>    | <a href="#">20747</a>     | speckle-type POZ protein         | <a href="#">Spop</a>               | 1.093 | 1.623 | 0.147347 | 0.389535 |
| 4192 | 10512867 | <a href="#">NM_172304</a>    | <a href="#">269536</a>    | testis expressed gene 10         | <a href="#">Tex10</a>              | 1.093 | 0.851 | 0.422105 | 0.684326 |
| 4193 | 10561085 | <a href="#">NM_144922</a>    | <a href="#">232989</a>    | heterogeneous nuclear ribonucl   | <a href="#">Hnrpu1</a>             | 1.093 | 1.278 | 0.240767 | 0.513737 |
| 4194 | 10567412 | <a href="#">NM_027698</a>    | <a href="#">71151</a>     | exonuclease domain containing    | <a href="#">Exod1</a>              | 1.093 | 0.798 | 0.45055  | 0.707814 |
| 4195 | 10356305 | <a href="#">NM_008311</a>    | <a href="#">15559</a>     | 5-hydroxytryptamine (serotonin   | <a href="#">Htr2b</a>              | 1.093 | 0.818 | 0.439737 | 0.699031 |
| 4196 | 10373365 | <a href="#">AK042023</a>     | <a href="#">100126225</a> | predicted gene, ENSMUSG000000005 | <a href="#">ENSMUSG00000055902</a> | 1.093 | 0.74  | 0.482555 | 0.731356 |
| 4197 | 10549762 | <a href="#">NM_146178</a>    | <a href="#">232821</a>    | coiled-coil domain containing    | <a href="#">Ccdc106</a>            | 1.093 | 0.894 | 0.400199 | 0.666098 |
| 4198 | 10416938 | <a href="#">XM_139243</a>    | <a href="#">223186</a>    | predicted gene, EG223186         | <a href="#">EG223186</a>           | 1.093 | 1.884 | 0.100262 | 0.30975  |
| 4199 | 10466268 | <a href="#">NM_001011524</a> | <a href="#">258227</a>    | olfactory receptor 1418          | <a href="#">Olfr1418</a>           | 1.093 | 1.102 | 0.306047 | 0.582506 |
| 4200 | 10466423 | <a href="#">NM_198019</a>    | <a href="#">208518</a>    | centrosomal protein 78           | <a href="#">Cep78</a>              | 1.093 | 0.491 | 0.638021 | 0.835923 |
| 4201 | 10449926 | <a href="#">NM_177359</a>    | <a href="#">240064</a>    | RIKEN cDNA 6030490101 gene       | <a href="#">6030490101Rik</a>      | 1.093 | 1.271 | 0.243255 | 0.516291 |
| 4202 | 10425287 | <a href="#">NM_134090</a>    | <a href="#">105785</a>    | KDEL (Lys-Asp-Glu-Leu) endopla   | <a href="#">Kdelr3</a>             | 1.093 | 1.209 | 0.264923 | 0.540102 |
| 4203 | 10373000 | <a href="#">NM_026858</a>    | <a href="#">68876</a>     | XRCC6 binding protein 1          | <a href="#">Xrcc6bp1</a>           | 1.093 | 1.124 | 0.296856 | 0.573427 |
| 4204 | 10492330 | <a href="#">NM_008772</a>    | <a href="#">18441</a>     | purinergic receptor P2Y, G-pro   | <a href="#">P2ry1</a>              | 1.093 | 0.396 | 0.703727 | 0.870071 |
| 4205 | 10438358 | <a href="#">NM_213614</a>    | <a href="#">18951</a>     | septin 5                         | <a href="#">Sept5</a>              | 1.093 | 1.06  | 0.323301 | 0.599849 |
| 4206 | 10388234 | <a href="#">NM_010353</a>    | <a href="#">14841</a>     | germ cell-specific gene 2        | <a href="#">Gsg2</a>               | 1.093 | 0.968 | 0.364392 | 0.635557 |
| 4207 | 10548086 | <a href="#">NM_009013</a>    | <a href="#">19362</a>     | RAD51 associated protein 1       | <a href="#">Rad51ap1</a>           | 1.093 | 1.375 | 0.210452 | 0.475962 |
| 4208 | 10577792 | <a href="#">NM_031257</a>    | <a href="#">83436</a>     | pleckstrin homology domain-con   | <a href="#">Plekha2</a>            | 1.093 | 0.616 | 0.556626 | 0.785091 |
| 4209 | 10582664 | <a href="#">BC058626</a>     | <a href="#">69551</a>     | RIKEN cDNA 2310022B05 gene       | <a href="#">2310022B05Rik</a>      | 1.093 | 1.193 | 0.270564 | 0.545253 |
| 4210 | 10434289 |                              |                           |                                  |                                    | 1.093 | 0.763 | 0.46988  | 0.721925 |
| 4211 | 10378833 | <a href="#">NM_177710</a>    | <a href="#">237860</a>    | slingshot homolog 2 (Drosophil   | <a href="#">Ssh2</a>               | 1.093 | 0.594 | 0.570774 | 0.795023 |
| 4212 | 10583021 | <a href="#">NM_027924</a>    | <a href="#">71785</a>     | platelet-derived growth factor   | <a href="#">Pdgfd</a>              | 1.093 | 0.548 | 0.600209 | 0.812161 |
| 4213 | 10402249 | <a href="#">NM_029705</a>    | <a href="#">110616</a>    | ataxin 3                         | <a href="#">Atxn3</a>              | 1.092 | 1.231 | 0.25701  | 0.531359 |
| 4214 | 10488785 | <a href="#">NM_007891</a>    | <a href="#">13555</a>     | E2F transcription factor 1       | <a href="#">E2f1</a>               | 1.092 | 1.533 | 0.167943 | 0.419243 |
| 4215 | 10496455 |                              |                           |                                  |                                    | 1.092 | 1.028 | 0.337177 | 0.612796 |
| 4216 | 10355785 | <a href="#">BC021773</a>     | <a href="#">74577</a>     | galactosidase, beta 1-like       | <a href="#">Glb1l</a>              | 1.092 | 1.151 | 0.286636 | 0.562228 |
| 4217 | 10502973 | <a href="#">NM_172474</a>    | <a href="#">209584</a>    | tRNA-yW synthesizing protein 3   | <a href="#">Tyw3</a>               | 1.092 | 1.077 | 0.316189 | 0.59316  |
| 4218 | 10606058 | <a href="#">NM_009910</a>    | <a href="#">12766</a>     | chemokine (C-X-C motif) recept   | <a href="#">Cxcr3</a>              | 1.092 | 1.342 | 0.220208 | 0.488992 |
| 4219 | 10355259 | <a href="#">NM_021285</a>    | <a href="#">17901</a>     | myosin, light polypeptide 1      | <a href="#">My1l</a>               | 1.092 | 0.569 | 0.586353 | 0.803667 |
| 4220 | 10504957 | <a href="#">NM_008017</a>    | <a href="#">14211</a>     | structural maintenance of chro   | <a href="#">Smc2</a>               | 1.092 | 1.135 | 0.292599 | 0.568731 |
| 4221 | 10391075 | <a href="#">NM_212483</a>    | <a href="#">68239</a>     | keratin 42                       | <a href="#">Krt42</a>              | 1.092 | 1.466 | 0.184961 | 0.44255  |
| 4222 | 10478077 | <a href="#">NM_177658</a>    | <a href="#">228850</a>    | RIKEN cDNA B230339M05 gene       | <a href="#">B230339M05Rik</a>      | 1.092 | 0.938 | 0.378476 | 0.648238 |
| 4223 | 10601705 | <a href="#">NM_145924</a>    | <a href="#">102920</a>    | centromere protein I             | <a href="#">Cenpi</a>              | 1.092 | 1.298 | 0.234253 | 0.505464 |
| 4224 | 10551377 | <a href="#">NM_001033315</a> | <a href="#">233020</a>    | homeodomain interacting protei   | <a href="#">Hipk4</a>              | 1.092 | 1.556 | 0.162388 | 0.411033 |
| 4225 | 10404612 | <a href="#">NM_001013392</a> | <a href="#">68750</a>     | ras responsive element binding   | <a href="#">Rreb1</a>              | 1.092 | 0.904 | 0.395301 | 0.66309  |
| 4226 | 10533993 | <a href="#">NM_133895</a>    | <a href="#">100561</a>    | solute carrier family 15, memb   | <a href="#">Slc15a4</a>            | 1.092 | 1.602 | 0.151847 | 0.395645 |
| 4227 | 10476207 | <a href="#">NM_009730</a>    | <a href="#">11990</a>     | attractin                        | <a href="#">Atm</a>                | 1.092 | 1.867 | 0.102972 | 0.315176 |
| 4228 | 10581650 | <a href="#">NM_011998</a>    | <a href="#">26887</a>     | carbohydrate (chondroitin 6/ke   | <a href="#">Chst4</a>              | 1.092 | 1.087 | 0.312011 | 0.588349 |
| 4229 | 10350024 | <a href="#">NM_153128</a>    | <a href="#">240756</a>    | kelch-like 12 (Drosophila)       | <a href="#">Klhl12</a>             | 1.092 | 1.42  | 0.197428 | 0.457935 |
| 4230 | 10600744 |                              |                           |                                  |                                    | 1.092 | 1.186 | 0.273046 | 0.547665 |
| 4231 | 10427881 | <a href="#">XR_001935</a>    | <a href="#">666875</a>    | predicted gene, EG666875         | <a href="#">EG666875</a>           | 1.092 | 0.901 | 0.396768 | 0.664039 |
| 4232 | 10560548 | <a href="#">NM_027189</a>    | <a href="#">69731</a>     | gem (nuclear organelle) associ   | <a href="#">Gemin7</a>             | 1.092 | 0.898 | 0.398095 | 0.664555 |
| 4233 | 10510809 | <a href="#">BC052148</a>     | <a href="#">97159</a>     | RIKEN cDNA A430005L14 gene       | <a href="#">A430005L14Rik</a>      | 1.092 | 0.526 | 0.614458 | 0.82153  |
| 4234 | 10483698 | <a href="#">NM_153138</a>    | <a href="#">215280</a>    | WAS/WASL interacting protein f   | <a href="#">Wipf1</a>              | 1.092 | 0.906 | 0.394257 | 0.661945 |
| 4235 | 10441923 | <a href="#">NM_001039552</a> | <a href="#">381062</a>    | RIKEN cDNA 2210404J11 gene       | <a href="#">2210404J11Rik</a>      | 1.092 | 1.098 | 0.307618 | 0.584192 |

|      |          |                                    |                        |                                |                                    |       |       |           |          |
|------|----------|------------------------------------|------------------------|--------------------------------|------------------------------------|-------|-------|-----------|----------|
| 4236 | 10410321 | <a href="#">BC080824</a>           | <a href="#">238692</a> | RIKEN cDNA C330011K17 gene     | <a href="#">C330011K17Rik</a>      | 1.092 | 1.348 | 0.218393  | 0.486434 |
| 4237 | 10426722 | <a href="#">NM_018786</a>          | <a href="#">54614</a>  | PRP40 pre-mRNA processing fact | <a href="#">Prpf40b</a>            | 1.092 | 1.411 | 0.199855  | 0.461578 |
| 4238 | 10549361 | <a href="#">NM_026281</a>          | <a href="#">67623</a>  | transmembrane 7 superfamily me | <a href="#">Tm7sf3</a>             | 1.092 | 0.666 | 0.525985  | 0.762002 |
| 4239 | 10454129 | <a href="#">NM_181682</a>          | <a href="#">225256</a> | desmoglein 1 beta              | <a href="#">Dsg1b</a>              | 1.092 | 1.096 | 0.308189  | 0.584951 |
| 4240 | 10591216 | <a href="#">NM_146904</a>          | <a href="#">57251</a>  | olfactory receptor 870         | <a href="#">Olf870</a>             | 1.092 | 1.047 | 0.32905   | 0.605314 |
| 4241 | 10435654 | <a href="#">NM_177093</a>          | <a href="#">320184</a> | leucine rich repeat containing | <a href="#">Lrrc58</a>             | 1.092 | 1.68  | 0.135648  | 0.371434 |
| 4242 | 10594840 | <a href="#">NM_001033208</a>       | <a href="#">102371</a> | expressed sequence AA407270    | <a href="#">AA407270</a>           | 1.092 | 1.698 | 0.131985  | 0.365036 |
| 4243 | 10362823 | <a href="#">NM_017472</a>          | <a href="#">54198</a>  | sorting nexin 3                | <a href="#">Snx3</a>               | 1.092 | 0.789 | 0.455103  | 0.711341 |
| 4244 | 10595327 | <a href="#">NM_001081216</a>       | <a href="#">83946</a>  | pleckstrin homology domain int | <a href="#">Phip</a>               | 1.092 | 1.456 | 0.187466  | 0.44575  |
| 4245 | 10436941 | <a href="#">NM_017391</a>          | <a href="#">53881</a>  | solute carrier family 5 (inosi | <a href="#">Slc5a3</a>             | 1.092 | 1.419 | 0.197544  | 0.45809  |
| 4246 | 10482172 | <a href="#">NM_199025</a>          | <a href="#">320633</a> | zinc finger and BTB domain con | <a href="#">Zbtb26</a>             | 1.092 | 0.993 | 0.35307   | 0.625939 |
| 4247 | 10478962 | <a href="#">BC016210</a>           | <a href="#">67017</a>  | RIKEN cDNA 2010011I20 gene     | <a href="#">2010011I20Rik</a>      | 1.091 | 1.322 | 0.226612  | 0.497248 |
| 4248 | 10406548 |                                    |                        |                                |                                    | 1.091 | 0.604 | 0.564564  | 0.790721 |
| 4249 | 10412844 | <a href="#">NM_009409</a>          | <a href="#">21974</a>  | topoisomerase (DNA) II beta    | <a href="#">Top2b</a>              | 1.091 | 1.439 | 0.192175  | 0.451484 |
| 4250 | 10515028 | <a href="#">NM_183300</a>          | <a href="#">230597</a> | zinc finger, FYVE domain conta | <a href="#">Zfyve9</a>             | 1.091 | 1.006 | 0.346837  | 0.621091 |
| 4251 | 10400866 | <a href="#">NM_053167</a>          | <a href="#">94090</a>  | tripartite motif-containing 9  | <a href="#">Trim9</a>              | 1.091 | 0.95  | 0.372735  | 0.643093 |
| 4252 | 10424842 | <a href="#">XM_890873</a>          | <a href="#">626280</a> | predicted gene, EG626280       | <a href="#">EG626280</a>           | 1.091 | 1.718 | 0.128139  | 0.358993 |
| 4253 | 10538684 | <a href="#">NM_001081145</a>       | <a href="#">68140</a>  | tigger transposable element de | <a href="#">Tigd2</a>              | 1.091 | 0.883 | 0.405873  | 0.670443 |
| 4254 | 10605055 | <a href="#">NM_028633</a>          | <a href="#">73738</a>  | Uchl5 interacting protein      | <a href="#">Uchl5ip</a>            | 1.091 | 0.846 | 0.424827  | 0.686739 |
| 4255 | 10355266 | <a href="#">NM_021295</a>          | <a href="#">14768</a>  | LanC (bacterial lantibiotic sy | <a href="#">Lancl1</a>             | 1.091 | 1.117 | 0.299715  | 0.575741 |
| 4256 | 10445640 | <a href="#">NM_001097623</a>       | <a href="#">224829</a> | transcriptional regulating fac | <a href="#">Trerf1</a>             | 1.091 | 1.306 | 0.231772  | 0.502487 |
| 4257 | 10504054 |                                    |                        |                                |                                    | 1.091 | 0.729 | 0.489167  | 0.736349 |
| 4258 | 10493692 | <a href="#">NM_026677</a>          | <a href="#">68328</a>  | RAB13, member RAS oncogene fam | <a href="#">Rab13</a>              | 1.091 | 1.998 | 0.0846797 | 0.279368 |
| 4259 | 10461824 | <a href="#">NM_146345</a>          | <a href="#">258342</a> | olfactory receptor 1491        | <a href="#">Olf1491</a>            | 1.091 | 0.845 | 0.425145  | 0.687043 |
| 4260 | 10541065 | <a href="#">NM_001011801</a>       | <a href="#">258020</a> | olfactory receptor 213         | <a href="#">Olf213</a>             | 1.091 | 1.367 | 0.212659  | 0.478245 |
| 4261 | 10412038 | <a href="#">BC021311</a>           | <a href="#">67263</a>  | zinc finger, SWIM domain conta | <a href="#">Zswim6</a>             | 1.091 | 0.682 | 0.516239  | 0.755582 |
| 4262 | 10485378 | <a href="#">NM_001083810</a>       | <a href="#">72446</a>  | RIKEN cDNA 2600010E01 gene     | <a href="#">2600010E01Rik</a>      | 1.091 | 1.783 | 0.116596  | 0.339947 |
| 4263 | 10351551 | <a href="#">NM_172845</a>          | <a href="#">240913</a> | a disintegrin-like and metallo | <a href="#">Adamt4</a>             | 1.091 | 1.744 | 0.123499  | 0.351591 |
| 4264 | 10361834 | <a href="#">NM_138628</a>          | <a href="#">378431</a> | taxilin beta                   | <a href="#">Txlnb</a>              | 1.091 | 1.297 | 0.23473   | 0.505978 |
| 4265 | 10541191 | <a href="#">NM_011236</a>          | <a href="#">19365</a>  | RAD52 homolog (S. cerevisiae)  | <a href="#">Rad52</a>              | 1.091 | 1.732 | 0.12553   | 0.354782 |
| 4266 | 10385486 | <a href="#">NM_145377</a>          | <a href="#">211007</a> | tripartite motif-containing 41 | <a href="#">Trim41</a>             | 1.091 | 1.6   | 0.152388  | 0.396241 |
| 4267 | 10482301 | <a href="#">NM_178778</a>          | <a href="#">320271</a> | RIKEN cDNA A930041I02 gene     | <a href="#">A930041I02Rik</a>      | 1.091 | 0.862 | 0.416251  | 0.67936  |
| 4268 | 10361799 | <a href="#">NM_025748</a>          | <a href="#">66757</a>  | adenosine deaminase, tRNA-spec | <a href="#">Adat2</a>              | 1.091 | 0.582 | 0.578208  | 0.79826  |
| 4269 | 10345032 | <a href="#">NM_010552</a>          | <a href="#">16171</a>  | interleukin 17A                | <a href="#">Il17a</a>              | 1.091 | 1.141 | 0.290376  | 0.566551 |
| 4270 | 10605811 | <a href="#">NM_175179</a>          | <a href="#">72345</a>  | RIKEN cDNA 2810002O09 gene     | <a href="#">2810002O09Rik</a>      | 1.091 | 1.337 | 0.221858  | 0.491462 |
| 4271 | 10505282 | <a href="#">NM_027297</a>          | <a href="#">70052</a>  | PRP4 pre-mRNA processing fact  | <a href="#">Prpf4</a>              | 1.091 | 0.909 | 0.392686  | 0.660631 |
| 4272 | 10457886 | <a href="#">ENSMUST00000068352</a> | <a href="#">791345</a> | predicted gene, ENSMUSG0000005 | <a href="#">ENSMUSG00000054990</a> | 1.091 | 1.11  | 0.30273   | 0.578798 |
| 4273 | 10599598 | <a href="#">ENSMUST00000068507</a> | <a href="#">319912</a> | RIKEN cDNA A630012P03 gene     | <a href="#">A630012P03Rik</a>      | 1.09  | 1.762 | 0.120218  | 0.346569 |
| 4274 | 10359701 | <a href="#">NM_032005</a>          | <a href="#">83993</a>  | T-box 19                       | <a href="#">Tbx19</a>              | 1.09  | 1.147 | 0.288136  | 0.563996 |
| 4275 | 10558754 | <a href="#">NM_145387</a>          | <a href="#">212974</a> | ATH1, acid trehalase-like 1 (y | <a href="#">Ath11</a>              | 1.09  | 1.97  | 0.0882894 | 0.286405 |
| 4276 | 10509244 | <a href="#">ENSMUST00000084593</a> | <a href="#">320133</a> | RIKEN cDNA 6030445D17 gene     | <a href="#">6030445D17Rik</a>      | 1.09  | 2.045 | 0.0789367 | 0.267474 |
| 4277 | 10404840 | <a href="#">NM_009856</a>          | <a href="#">12522</a>  | CD83 antigen                   | <a href="#">Cd83</a>               | 1.09  | 0.912 | 0.39146   | 0.659734 |
| 4278 | 10360003 | <a href="#">NM_023173</a>          | <a href="#">80915</a>  | dual specificity phosphatase 1 | <a href="#">Dusp12</a>             | 1.09  | 1.092 | 0.309793  | 0.586696 |
| 4279 | 10510464 | <a href="#">NM_026963</a>          | <a href="#">69151</a>  | leucine zipper and CTNNBIP1 do | <a href="#">Lzic</a>               | 1.09  | 0.736 | 0.484711  | 0.733195 |
| 4280 | 10404400 | <a href="#">NM_001013788</a>       | <a href="#">432743</a> | predicted gene, EG432743       | <a href="#">EG432743</a>           | 1.09  | 1.298 | 0.234196  | 0.505444 |
| 4281 | 10368279 | <a href="#">NM_001010828</a>       | <a href="#">215855</a> | trace amine-associated recepto | <a href="#">Taar6</a>              | 1.09  | 1.312 | 0.229731  | 0.500845 |
| 4282 | 10571266 | <a href="#">NM_017374</a>          | <a href="#">19053</a>  | protein phosphatase 2 (formerl | <a href="#">Ppp2cb</a>             | 1.09  | 1.001 | 0.349173  | 0.622762 |
| 4283 | 10449177 | <a href="#">NM_001039038</a>       | <a href="#">621239</a> | RIKEN cDNA F430201B04 gene     | <a href="#">F430201B04Rik</a>      | 1.09  | 1.678 | 0.135933  | 0.371867 |

|      |          |                                    |                        |                                |                               |       |       |           |          |
|------|----------|------------------------------------|------------------------|--------------------------------|-------------------------------|-------|-------|-----------|----------|
| 4284 | 10523547 | <a href="#">NM 172715</a>          | <a href="#">231510</a> | 1-acylglycerol-3-phosphate O-a | <a href="#">Agpat9</a>        | 1.09  | 1.299 | 0.233794  | 0.505106 |
| 4285 | 10403464 | <a href="#">NM 001081426</a>       | <a href="#">208440</a> | DIP2 disco-interacting protein | <a href="#">Dip2c</a>         | 1.09  | 1.052 | 0.326711  | 0.602834 |
| 4286 | 10389625 |                                    |                        |                                |                               | 1.09  | 0.384 | 0.711871  | 0.873734 |
| 4287 | 10397559 | <a href="#">XR 032624</a>          | <a href="#">674986</a> | similar to small nuclear ribon | <a href="#">LOC674986</a>     | 1.09  | 0.259 | 0.802881  | 0.920071 |
| 4288 | 10524647 | <a href="#">NM 029012</a>          | <a href="#">74585</a>  | signal peptide peptidase 3     | <a href="#">Sppl3</a>         | 1.09  | 1.727 | 0.126509  | 0.356138 |
| 4289 | 10408848 |                                    |                        |                                |                               | 1.09  | 1.167 | 0.280425  | 0.555802 |
| 4290 | 10571382 | <a href="#">BC069898</a>           | <a href="#">80286</a>  | tumor suppressor candidate 3   | <a href="#">Tusc3</a>         | 1.09  | 0.766 | 0.468037  | 0.720506 |
| 4291 | 10491805 | <a href="#">NM 011495</a>          | <a href="#">20873</a>  | polo-like kinase 4 (Drosophila | <a href="#">Plk4</a>          | 1.09  | 0.829 | 0.433917  | 0.694402 |
| 4292 | 10378555 | <a href="#">NM 001102611</a>       | <a href="#">319822</a> | SET and MYND domain containing | <a href="#">Smyd4</a>         | 1.09  | 1.943 | 0.0919194 | 0.293764 |
| 4293 | 10462039 | <a href="#">NM 001035244</a>       | <a href="#">226025</a> | transient receptor potential c | <a href="#">Trpm3</a>         | 1.09  | 1.944 | 0.0917683 | 0.293524 |
| 4294 | 10359506 | <a href="#">BC014872</a>           | <a href="#">71449</a>  | RIKEN cDNA 5630401D24 gene     | <a href="#">5630401D24Rik</a> | 1.09  | 1.372 | 0.211283  | 0.476813 |
| 4295 | 10580608 | <a href="#">ENSMUST00000098499</a> | <a href="#">75704</a>  | RIKEN cDNA 2310039D24 gene     | <a href="#">2310039D24Rik</a> | 1.09  | 1.198 | 0.268901  | 0.543464 |
| 4296 | 10387807 | <a href="#">BC055357</a>           | <a href="#">104457</a> | RIKEN cDNA 0610010K14 gene     | <a href="#">0610010K14Rik</a> | 1.09  | 0.981 | 0.358516  | 0.630584 |
| 4297 | 10588079 | <a href="#">NM 001033983</a>       | <a href="#">546157</a> | RIKEN cDNA 7420426K07 gene     | <a href="#">7420426K07Rik</a> | 1.09  | 1.505 | 0.174887  | 0.427987 |
| 4298 | 10532504 | <a href="#">NM 153571</a>          | <a href="#">100900</a> | HscB iron-sulfur cluster co-ch | <a href="#">Hscb</a>          | 1.09  | 0.043 | 0.967083  | 0.986963 |
| 4299 | 10506583 | <a href="#">NM 177667</a>          | <a href="#">230576</a> | tetratricopeptide repeat domai | <a href="#">Ttc22</a>         | 1.09  | 1.175 | 0.277402  | 0.552507 |
| 4300 | 10608087 |                                    |                        |                                |                               | 1.09  | 0.781 | 0.459747  | 0.71461  |
| 4301 | 10368616 | <a href="#">NM 028287</a>          | <a href="#">72580</a>  | zinc finger with UFM1-specific | <a href="#">Zufsp</a>         | 1.09  | 1.336 | 0.222285  | 0.492042 |
| 4302 | 10437136 | <a href="#">NM 007890</a>          | <a href="#">13548</a>  | dual-specificity tyrosine-(Y)- | <a href="#">Dyrk1a</a>        | 1.09  | 1.664 | 0.138783  | 0.376788 |
| 4303 | 10602196 | <a href="#">AK220382</a>           | <a href="#">209540</a> | retrotransposon gag domain con | <a href="#">Rgag1</a>         | 1.09  | 0.845 | 0.425019  | 0.686944 |
| 4304 | 10430372 | <a href="#">NM 009008</a>          | <a href="#">19354</a>  | RAS-related C3 botulinum subst | <a href="#">Rac2</a>          | 1.09  | 1.3   | 0.233662  | 0.505065 |
| 4305 | 10603323 | <a href="#">NM 138605</a>          | <a href="#">54646</a>  | protein phosphatase 1, regulat | <a href="#">Ppp1r3f</a>       | 1.09  | 1.628 | 0.146255  | 0.388006 |
| 4306 | 10511510 | <a href="#">NM 178112</a>          | <a href="#">72656</a>  | integrator complex subunit 8   | <a href="#">Ints8</a>         | 1.09  | 1.062 | 0.322697  | 0.599359 |
| 4307 | 10455342 |                                    |                        |                                |                               | 1.089 | 1.628 | 0.146348  | 0.3881   |
| 4308 | 10362454 |                                    |                        |                                |                               | 1.089 | 0.159 | 0.878032  | 0.951715 |
| 4309 | 10579331 | <a href="#">NM 011819</a>          | <a href="#">23886</a>  | growth differentiation factor  | <a href="#">Gdf15</a>         | 1.089 | 1.742 | 0.12376   | 0.352065 |
| 4310 | 10500103 | <a href="#">NM 029885</a>          | <a href="#">213054</a> | GA repeat binding protein, bet | <a href="#">Gabpb2</a>        | 1.089 | 0.581 | 0.578618  | 0.798427 |
| 4311 | 10405464 | <a href="#">NM 001038018</a>       | <a href="#">26385</a>  | G protein-coupled receptor kin | <a href="#">Grk6</a>          | 1.089 | 1.104 | 0.30496   | 0.581378 |
| 4312 | 10519504 | <a href="#">NM 025618</a>          | <a href="#">109552</a> | sorcin                         | <a href="#">Sri</a>           | 1.089 | 1.529 | 0.168887  | 0.420407 |
| 4313 | 10509228 | <a href="#">NM 028871</a>          | <a href="#">74326</a>  | heterogeneous nuclear ribonuel | <a href="#">Hnrmp</a>         | 1.089 | 1.027 | 0.337442  | 0.613121 |
| 4314 | 10444229 | <a href="#">NM 010386</a>          | <a href="#">14998</a>  | histocompatibility 2, class II | <a href="#">H2-DMa</a>        | 1.089 | 1.427 | 0.195333  | 0.455561 |
| 4315 | 10494335 | <a href="#">NM 001025613</a>       | <a href="#">229603</a> | OTU domain containing 7B       | <a href="#">Otu7b</a>         | 1.089 | 1.443 | 0.19096   | 0.450028 |
| 4316 | 10566723 | <a href="#">NM 057173</a>          | <a href="#">109594</a> | LIM domain only 1              | <a href="#">Lmo1</a>          | 1.089 | 0.348 | 0.737779  | 0.888255 |
| 4317 | 10421250 | <a href="#">NM 001004155</a>       | <a href="#">268759</a> | RIKEN cDNA 9930012K11 gene     | <a href="#">9930012K11Rik</a> | 1.089 | 0.786 | 0.456731  | 0.712642 |
| 4318 | 10584034 | <a href="#">NM 028874</a>          | <a href="#">102607</a> | sorting nexin 19               | <a href="#">Snx19</a>         | 1.089 | 1.121 | 0.298361  | 0.574601 |
| 4319 | 10475625 | <a href="#">NM 025613</a>          | <a href="#">58521</a>  | EP300 interacting inhibitor of | <a href="#">Eid1</a>          | 1.089 | 1.355 | 0.216399  | 0.483657 |
| 4320 | 10521163 | <a href="#">ENSMUST00000094869</a> | <a href="#">381633</a> | gene model 1673, (NCBI)        | <a href="#">Gmi1673</a>       | 1.089 | 1.092 | 0.309914  | 0.586734 |
| 4321 | 10564698 | <a href="#">NM 029585</a>          | <a href="#">76375</a>  | de-etiolated homolog 1 (Arabid | <a href="#">Det1</a>          | 1.089 | 0.509 | 0.625839  | 0.829508 |
| 4322 | 10385542 | <a href="#">NM 172793</a>          | <a href="#">237754</a> | butyrophilin-like 9            | <a href="#">Btnl9</a>         | 1.089 | 1.535 | 0.167425  | 0.418443 |
| 4323 | 10384502 |                                    |                        |                                |                               | 1.089 | 0.289 | 0.780945  | 0.91101  |
| 4324 | 10589057 |                                    |                        |                                |                               | 1.089 | 0.896 | 0.399383  | 0.665621 |
| 4325 | 10509218 | <a href="#">NM 009557</a>          | <a href="#">22704</a>  | zinc finger protein 46         | <a href="#">Zfp46</a>         | 1.089 | 1.57  | 0.159224  | 0.406366 |
| 4326 | 10534389 | <a href="#">NM 020504</a>          | <a href="#">57255</a>  | claudin 13                     | <a href="#">Cldn13</a>        | 1.089 | 0.21  | 0.839347  | 0.935017 |
| 4327 | 10387014 | <a href="#">NM 009157</a>          | <a href="#">26398</a>  | mitogen-activated protein kina | <a href="#">Map2k4</a>        | 1.089 | 0.829 | 0.433529  | 0.694014 |
| 4328 | 10521068 | <a href="#">NM 001081101</a>       | <a href="#">71101</a>  | RIKEN cDNA 4933407H18 gene     | <a href="#">4933407H18Rik</a> | 1.089 | 1.218 | 0.26159   | 0.536103 |
| 4329 | 10415806 | <a href="#">ENSMUST00000039064</a> | <a href="#">629059</a> | predicted gene, EG629059       | <a href="#">EG629059</a>      | 1.089 | 1.488 | 0.179068  | 0.434349 |
| 4330 | 10352690 | <a href="#">NM 021421</a>          | <a href="#">52477</a>  | angel homolog 2 (Drosophila)   | <a href="#">Angel2</a>        | 1.089 | 1.297 | 0.234479  | 0.50565  |
| 4331 | 10575291 | <a href="#">NM 029468</a>          | <a href="#">75871</a>  | zinc finger protein 821        | <a href="#">Zfp821</a>        | 1.089 | 0.921 | 0.386623  | 0.655658 |
| 4332 | 10359814 |                                    |                        |                                |                               | 1.089 | 1.408 | 0.200626  | 0.462553 |
| 4333 | 10391036 | <a href="#">NM 008471</a>          | <a href="#">16669</a>  | keratin 19                     | <a href="#">Krt19</a>         | 1.089 | 0.195 | 0.851054  | 0.94011  |
| 4334 | 10532267 | <a href="#">NM 001104621</a>       | <a href="#">435864</a> | vomer nasal 2, receptor 9      | <a href="#">Vmn2r9</a>        | 1.089 | 0.228 | 0.825973  | 0.929952 |

| 4333 | 1042700  |                                    |                        |                                 |                               | 1.089 | 1.72  | 0.12780   | 0.38043  |
|------|----------|------------------------------------|------------------------|---------------------------------|-------------------------------|-------|-------|-----------|----------|
| 4336 | 10498998 | <a href="#">BC062940</a>           | <a href="#">229473</a> | RIKEN cDNA D930015E06 gene      | <a href="#">D930015E06Rik</a> | 1.089 | 0.924 | 0.385325  | 0.654508 |
| 4337 | 10534935 | <a href="#">NM_133209</a>          | <a href="#">170741</a> | paired immunoglobulin-like type | <a href="#">Pilrb1</a>        | 1.089 | 1.004 | 0.347654  | 0.621632 |
| 4338 | 10522873 | <a href="#">NR_003652</a>          | <a href="#">654494</a> | predicted gene, EG654494        | <a href="#">EG654494</a>      | 1.089 | 1.676 | 0.136421  | 0.372866 |
| 4339 | 10369702 | <a href="#">ENSMUST00000099674</a> | <a href="#">52463</a>  | tet oncogene 1                  | <a href="#">Tet1</a>          | 1.089 | 1.228 | 0.258181  | 0.532272 |
| 4340 | 10405820 | <a href="#">ENSMUST00000099440</a> | <a href="#">66503</a>  | RIKEN cDNA 1810034E14 gene      | <a href="#">1810034E14Rik</a> | 1.089 | 1.105 | 0.304633  | 0.581126 |
| 4341 | 10402715 | <a href="#">NM_027404</a>          | <a href="#">70369</a>  | BCL2-associated athanogene 5    | <a href="#">Bag5</a>          | 1.089 | 0.634 | 0.545463  | 0.777437 |
| 4342 | 10351197 | <a href="#">NM_011346</a>          | <a href="#">20343</a>  | selectin, lymphocyte            | <a href="#">Sell</a>          | 1.089 | 0.588 | 0.574507  | 0.797076 |
| 4343 | 10539766 | <a href="#">NM_001040106</a>       | <a href="#">269774</a> | AP2 associated kinase 1         | <a href="#">Aak1</a>          | 1.088 | 0.98  | 0.358912  | 0.630983 |
| 4344 | 10516211 | <a href="#">NM_001030274</a>       | <a href="#">595136</a> | NADH dehydrogenase (ubiquinone  | <a href="#">Ndufs5</a>        | 1.088 | 0.244 | 0.814165  | 0.925212 |
| 4345 | 10370708 | <a href="#">NM_025554</a>          | <a href="#">66420</a>  | polymerase (RNA) II (DNA direc  | <a href="#">Polr2e</a>        | 1.088 | 0.896 | 0.399353  | 0.665621 |
| 4346 | 10460591 | <a href="#">NM_021438</a>          | <a href="#">58249</a>  | fibroblast growth factor (acid  | <a href="#">Fibp</a>          | 1.088 | 0.931 | 0.38177   | 0.651436 |
| 4347 | 10549721 |                                    |                        |                                 |                               | 1.088 | 1.315 | 0.228627  | 0.499699 |
| 4348 | 10373330 | <a href="#">NM_017473</a>          | <a href="#">54150</a>  | retinol dehydrogenase 7         | <a href="#">Rdh7</a>          | 1.088 | 1.632 | 0.145462  | 0.387083 |
| 4349 | 10579548 | <a href="#">ENSMUST00000098643</a> | <a href="#">234407</a> | glycosyltransferase 25 domain   | <a href="#">Glt25d1</a>       | 1.088 | 0.966 | 0.365181  | 0.636291 |
| 4350 | 10471457 | <a href="#">NM_011373</a>          | <a href="#">20448</a>  | ST6 (alpha-N-acetyl-neuraminyl  | <a href="#">St6galnac4</a>    | 1.088 | 1.241 | 0.253549  | 0.527818 |
| 4351 | 10491920 | <a href="#">AK016297</a>           | <a href="#">67746</a>  | RIKEN cDNA 4930577N17 gene      | <a href="#">4930577N17Rik</a> | 1.088 | 0.8   | 0.449495  | 0.706889 |
| 4352 | 10472724 | <a href="#">NM_027352</a>          | <a href="#">70231</a>  | golgi reassembly stacking prot  | <a href="#">Gorasp2</a>       | 1.088 | 1.236 | 0.255178  | 0.529489 |
| 4353 | 10530870 | <a href="#">NM_007937</a>          | <a href="#">13839</a>  | Eph receptor A5                 | <a href="#">Epha5</a>         | 1.088 | 0.588 | 0.574742  | 0.797076 |
| 4354 | 10579852 | <a href="#">NM_133823</a>          | <a href="#">109136</a> | methylmalonic aciduria (cobala  | <a href="#">Mmaa</a>          | 1.088 | 1.014 | 0.343597  | 0.617668 |
| 4355 | 10469138 |                                    |                        |                                 |                               | 1.088 | 0.32  | 0.758366  | 0.898716 |
| 4356 | 10481857 | <a href="#">NM_016768</a>          | <a href="#">18516</a>  | pre B-cell leukemia transcript  | <a href="#">Pbx3</a>          | 1.088 | 0.393 | 0.705805  | 0.871814 |
| 4357 | 10509463 | <a href="#">NM_172703</a>          | <a href="#">230861</a> | eukaryotic translation initiat  | <a href="#">Eif4g3</a>        | 1.088 | 1.522 | 0.170647  | 0.422304 |
| 4358 | 10449608 | <a href="#">NM_001081160</a>       | <a href="#">74762</a>  | MAM domain containing glycosyl  | <a href="#">Mdga1</a>         | 1.088 | 1.891 | 0.0993161 | 0.307864 |
| 4359 | 10515733 | <a href="#">ENSMUST00000075406</a> | <a href="#">230676</a> | cDNA sequence BC059842          | <a href="#">BC059842</a>      | 1.088 | 0.993 | 0.352868  | 0.625927 |
| 4360 | 10539805 | <a href="#">ENSMUST00000095740</a> | <a href="#">320001</a> | RIKEN cDNA E230015B07 gene      | <a href="#">E230015B07Rik</a> | 1.088 | 1.492 | 0.178082  | 0.432735 |
| 4361 | 10383502 | <a href="#">NM_001038653</a>       | <a href="#">80879</a>  | solute carrier family 16 (mono  | <a href="#">Slc16a3</a>       | 1.088 | 1.598 | 0.152908  | 0.396925 |
| 4362 | 10578071 | <a href="#">NM_011721</a>          | <a href="#">22427</a>  | Werner syndrome homolog (human  | <a href="#">Wrn</a>           | 1.088 | 1.711 | 0.129575  | 0.361014 |
| 4363 | 10590597 | <a href="#">NM_030692</a>          | <a href="#">83493</a>  | SAC1 (suppressor of actin muta  | <a href="#">Sacm1l</a>        | 1.088 | 1.198 | 0.268905  | 0.543464 |
| 4364 | 10464328 | <a href="#">NM_011128</a>          | <a href="#">18947</a>  | pancreatic lipase-related prot  | <a href="#">Pnliprp2</a>      | 1.088 | 1.56  | 0.161488  | 0.409658 |
| 4365 | 10409990 | <a href="#">ENSMUST00000091563</a> | <a href="#">211378</a> | RIKEN cDNA 6720489N17 gene      | <a href="#">6720489N17Rik</a> | 1.088 | 0.262 | 0.800846  | 0.919467 |
| 4366 | 10453734 |                                    |                        |                                 |                               | 1.088 | 0.91  | 0.392103  | 0.660239 |
| 4367 | 10350790 | <a href="#">ENSMUST00000065673</a> | <a href="#">240832</a> | torsin A interacting protein 2  | <a href="#">Tor1aip2</a>      | 1.088 | 0.625 | 0.551091  | 0.781221 |
| 4368 | 10430778 | <a href="#">NM_026737</a>          | <a href="#">68479</a>  | PHD finger protein 5A           | <a href="#">Phf5a</a>         | 1.088 | 0.522 | 0.617362  | 0.823029 |
| 4369 | 10580169 | <a href="#">NM_026350</a>          | <a href="#">67736</a>  | coiled-coil domain containing   | <a href="#">Ccdc130</a>       | 1.087 | 1.303 | 0.232553  | 0.503492 |
| 4370 | 10599736 | <a href="#">NM_001077361</a>       | <a href="#">14199</a>  | four and a half LIM domains 1   | <a href="#">Fhl1</a>          | 1.087 | 0.691 | 0.510998  | 0.752038 |
| 4371 | 10362271 |                                    |                        |                                 |                               | 1.087 | 0.958 | 0.369196  | 0.639859 |
| 4372 | 10529923 | <a href="#">NM_172153</a>          | <a href="#">209707</a> | ligand dependent nuclear recep  | <a href="#">Lcorl</a>         | 1.087 | 0.87  | 0.412167  | 0.676028 |
| 4373 | 10584067 | <a href="#">NM_001115130</a>       | <a href="#">235132</a> | zinc finger and BTB domain con  | <a href="#">Zbtb44</a>        | 1.087 | 0.921 | 0.38678   | 0.65582  |
| 4374 | 10472764 | <a href="#">NM_010064</a>          | <a href="#">13427</a>  | dynein cytoplasmic 1 intermedi  | <a href="#">Dync1i2</a>       | 1.087 | 1.229 | 0.257739  | 0.531852 |
| 4375 | 10601583 |                                    |                        |                                 |                               | 1.087 | 0.284 | 0.784206  | 0.912068 |
| 4376 | 10551724 | <a href="#">NM_029887</a>          | <a href="#">77254</a>  | Yip1 interacting factor homolo  | <a href="#">Yif1b</a>         | 1.087 | 1.296 | 0.234977  | 0.506303 |
| 4377 | 10568705 | <a href="#">ENSMUST00000097984</a> | <a href="#">627214</a> | RIKEN cDNA B830028B13 gene      | <a href="#">B830028B13Rik</a> | 1.087 | 1.389 | 0.206098  | 0.470186 |
| 4378 | 10594144 | <a href="#">NM_175325</a>          | <a href="#">102774</a> | Bardet-Biedl syndrome 4 homolo  | <a href="#">Bbs4</a>          | 1.087 | 1.351 | 0.217517  | 0.485293 |
| 4379 | 10459227 |                                    |                        |                                 |                               | 1.087 | 0.887 | 0.403826  | 0.668689 |
| 4380 | 10566587 | <a href="#">NM_146453</a>          | <a href="#">258445</a> | olfactory receptor 693          | <a href="#">Olfr693</a>       | 1.087 | 1.358 | 0.215305  | 0.482386 |
| 4381 | 10534061 | <a href="#">NM_172462</a>          | <a href="#">22648</a>  | zinc finger protein 11          | <a href="#">Zfp11</a>         | 1.087 | 1.908 | 0.0968312 | 0.303049 |
| 4382 | 10513406 | <a href="#">NM_021053</a>          | <a href="#">30936</a>  | solute carrier family 46, memb  | <a href="#">Slc46a2</a>       | 1.087 | 1.432 | 0.193925  | 0.453579 |
| 4383 | 10395227 | <a href="#">ENSMUST00000036862</a> | <a href="#">238123</a> | component of oligomeric golgi   | <a href="#">Cog5</a>          | 1.087 | 0.866 | 0.414585  | 0.677853 |
| 4384 | 10344939 | <a href="#">NM_009352</a>          | <a href="#">21749</a>  | telomeric repeat binding fact   | <a href="#">Terf1</a>         | 1.087 | 1.065 | 0.321135  | 0.598048 |

|      |          |                                    |                        |                                |                               |       |       |           |          |
|------|----------|------------------------------------|------------------------|--------------------------------|-------------------------------|-------|-------|-----------|----------|
| 4385 | 10516101 | <a href="#">NM_022033</a>          | <a href="#">64059</a>  | 3-oxoacid CoA transferase 2A   | <a href="#">Oxct2a</a>        | 1.087 | 0.955 | 0.370511  | 0.641245 |
| 4386 | 10585823 | <a href="#">XM_001479935</a>       | <a href="#">665268</a> | similar to Rp117 protein       | <a href="#">LOC665268</a>     | 1.087 | 0.57  | 0.585788  | 0.80308  |
| 4387 | 10579356 | <a href="#">NM_008841</a>          | <a href="#">18709</a>  | phosphatidylinositol 3-kinase, | <a href="#">Pik3r2</a>        | 1.087 | 1.779 | 0.117223  | 0.341258 |
| 4388 | 10431017 | <a href="#">NM_178869</a>          | <a href="#">319953</a> | tubulin tyrosine ligase-like 1 | <a href="#">Tll1</a>          | 1.087 | 0.242 | 0.815168  | 0.925866 |
| 4389 | 10423921 | <a href="#">NM_130885</a>          | <a href="#">170719</a> | oxidation resistance 1         | <a href="#">Oxr1</a>          | 1.087 | 1.06  | 0.323297  | 0.599849 |
| 4390 | 10477512 | <a href="#">BC018465</a>           | <a href="#">228802</a> | cDNA sequence BC018465         | <a href="#">BC018465</a>      | 1.087 | 1.452 | 0.188458  | 0.446521 |
| 4391 | 10511330 | <a href="#">NM_020021</a>          | <a href="#">17451</a>  | Moloney sarcoma oncogene       | <a href="#">Mos</a>           | 1.087 | 1.195 | 0.269757  | 0.544449 |
| 4392 | 10375557 | <a href="#">NM_146467</a>          | <a href="#">258459</a> | olfactory receptor 1388        | <a href="#">Olf1388</a>       | 1.087 | 1.312 | 0.229736  | 0.500845 |
| 4393 | 10380622 | <a href="#">NM_008270</a>          | <a href="#">15417</a>  | homeo box B9                   | <a href="#">Hoxb9</a>         | 1.087 | 1.087 | 0.312038  | 0.588349 |
| 4394 | 10363522 | <a href="#">BC119320</a>           | <a href="#">71767</a>  | trypsin domain containing 1    | <a href="#">Tysnd1</a>        | 1.087 | 1.009 | 0.345558  | 0.619665 |
| 4395 | 10528832 |                                    |                        |                                |                               | 1.087 | 1.518 | 0.17148   | 0.42362  |
| 4396 | 10561376 | <a href="#">NM_007866</a>          | <a href="#">13389</a>  | delta-like 3 (Drosophila)      | <a href="#">Dll3</a>          | 1.087 | 0.852 | 0.421673  | 0.683993 |
| 4397 | 10564791 | <a href="#">ENSMUST00000032763</a> | <a href="#">16576</a>  | kinesin family member 7        | <a href="#">Kif7</a>          | 1.087 | 0.462 | 0.657808  | 0.846971 |
| 4398 | 10442651 | <a href="#">NM_134126</a>          | <a href="#">106633</a> | intraflagellar transport 140 h | <a href="#">If140</a>         | 1.087 | 1.018 | 0.341691  | 0.616255 |
| 4399 | 10589616 | <a href="#">NM_148940</a>          | <a href="#">73336</a>  | RIKEN cDNA 1700036D21 gene     | <a href="#">1700036D21Rik</a> | 1.087 | 1.905 | 0.0972185 | 0.303677 |
| 4400 | 10488303 | <a href="#">NM_025820</a>          | <a href="#">66877</a>  | Crn, crooked neck-like 1 (Dros | <a href="#">Crnk11</a>        | 1.086 | 1.023 | 0.339347  | 0.614732 |
| 4401 | 10399965 | <a href="#">ENSMUST00000063828</a> | <a href="#">320046</a> | RIKEN cDNA F730043M19 gene     | <a href="#">F730043M19Rik</a> | 1.086 | 1.279 | 0.240603  | 0.513659 |
| 4402 | 10407803 | <a href="#">NM_031999</a>          | <a href="#">83924</a>  | G protein-coupled receptor 137 | <a href="#">Gpr137b</a>       | 1.086 | 0.625 | 0.551293  | 0.781322 |
| 4403 | 10596796 | <a href="#">NM_029169</a>          | <a href="#">19654</a>  | RNA binding motif protein 6    | <a href="#">Rbm6</a>          | 1.086 | 1.503 | 0.17523   | 0.428429 |
| 4404 | 10568432 | <a href="#">ENSMUST00000057557</a> | <a href="#">210711</a> | RIKEN cDNA 1110007A13 gene     | <a href="#">1110007A13Rik</a> | 1.086 | 1.309 | 0.230827  | 0.501612 |
| 4405 | 10375002 | <a href="#">NM_026252</a>          | <a href="#">67579</a>  | cytoplasmic polyadenylation el | <a href="#">Cpeb4</a>         | 1.086 | 0.479 | 0.646112  | 0.840365 |
| 4406 | 10365891 | <a href="#">NM_172051</a>          | <a href="#">319880</a> | transmembrane and coiled coil  | <a href="#">Tmec3</a>         | 1.086 | 1.798 | 0.114032  | 0.335061 |
| 4407 | 10361270 | <a href="#">NM_010778</a>          | <a href="#">17221</a>  | CD46 antigen, complement regul | <a href="#">Cd46</a>          | 1.086 | 0.446 | 0.668925  | 0.852739 |
| 4408 | 10362918 |                                    |                        |                                |                               | 1.086 | 1.52  | 0.17109   | 0.422843 |
| 4409 | 10558454 | <a href="#">NM_023140</a>          | <a href="#">30926</a>  | glutaredoxin 3                 | <a href="#">Glx3</a>          | 1.086 | 0.568 | 0.587293  | 0.804205 |
| 4410 | 10347254 | <a href="#">NM_018817</a>          | <a href="#">54380</a>  | Swi/SNF related matrix associa | <a href="#">Smarc11</a>       | 1.086 | 0.992 | 0.353268  | 0.626005 |
| 4411 | 10447477 | <a href="#">ENSMUST00000097270</a> | <a href="#">623954</a> | hypothetical protein LOC623954 | <a href="#">LOC623954</a>     | 1.086 | 1.761 | 0.120386  | 0.346744 |
| 4412 | 10570429 | <a href="#">NM_181854</a>          | <a href="#">101994</a> | zinc finger protein 828        | <a href="#">Zfp828</a>        | 1.086 | 1.103 | 0.305498  | 0.581774 |
| 4413 | 10476900 | <a href="#">NM_177655</a>          | <a href="#">228756</a> | cystatin-like 1                | <a href="#">Cst11</a>         | 1.086 | 0.751 | 0.476198  | 0.727414 |
| 4414 | 10429295 | <a href="#">NM_001033876</a>       | <a href="#">223604</a> | potassium channel, subfamily K | <a href="#">Kcnk9</a>         | 1.086 | 0.946 | 0.374945  | 0.644967 |
| 4415 | 10414366 | <a href="#">NM_030236</a>          | <a href="#">78938</a>  | F-box protein 34               | <a href="#">Fbxo34</a>        | 1.086 | 1.376 | 0.21012   | 0.475469 |
| 4416 | 10573903 | <a href="#">ENSMUST00000062522</a> | <a href="#">319388</a> | RIKEN cDNA D230002A01 gene     | <a href="#">D230002A01Rik</a> | 1.086 | 1.536 | 0.167276  | 0.41822  |
| 4417 | 10477361 | <a href="#">ENSMUST00000055893</a> | <a href="#">329541</a> | predicted gene, EG329541       | <a href="#">EG329541</a>      | 1.086 | 0.842 | 0.426972  | 0.688312 |
| 4418 | 10356194 | <a href="#">NM_133975</a>          | <a href="#">14897</a>  | thyroid hormone receptor inter | <a href="#">Trip12</a>        | 1.086 | 1.192 | 0.270854  | 0.545372 |
| 4419 | 10555840 | <a href="#">NM_147120</a>          | <a href="#">259124</a> | olfactory receptor 638         | <a href="#">Olf638</a>        | 1.086 | 1.664 | 0.138809  | 0.37681  |
| 4420 | 10592459 |                                    |                        |                                |                               | 1.086 | 0.622 | 0.552925  | 0.782578 |
| 4421 | 10542200 | <a href="#">NM_020590</a>          | <a href="#">57436</a>  | gamma-aminobutyric acid (GABA) | <a href="#">Gabarap11</a>     | 1.086 | 0.821 | 0.437931  | 0.697051 |
| 4422 | 10537076 |                                    |                        |                                |                               | 1.086 | 1.024 | 0.33906   | 0.614614 |
| 4423 | 10588642 | <a href="#">NM_018879</a>          | <a href="#">56032</a>  | tumor suppressor candidate 4   | <a href="#">Tusc4</a>         | 1.086 | 0.769 | 0.466068  | 0.719571 |
| 4424 | 10442300 | <a href="#">XR_001815</a>          | <a href="#">666030</a> | predicted gene, EG666030       | <a href="#">EG666030</a>      | 1.086 | 0.713 | 0.498076  | 0.742207 |
| 4425 | 10470446 | <a href="#">NM_011305</a>          | <a href="#">20181</a>  | retinoid X receptor alpha      | <a href="#">Rxra</a>          | 1.086 | 0.965 | 0.365688  | 0.636847 |
| 4426 | 10568288 | <a href="#">NM_198858</a>          | <a href="#">244218</a> | cardiotrophin 2                | <a href="#">Ctf2</a>          | 1.086 | 1.231 | 0.256911  | 0.53126  |
| 4427 | 10485042 | <a href="#">NM_001033451</a>       | <a href="#">381410</a> | zinc finger protein 408        | <a href="#">Zfp408</a>        | 1.086 | 1.045 | 0.329792  | 0.606148 |
| 4428 | 10404422 | <a href="#">NM_011454</a>          | <a href="#">20708</a>  | serine (or cysteine) peptidase | <a href="#">Serp1nb6b</a>     | 1.086 | 0.487 | 0.640604  | 0.837232 |
| 4429 | 10535497 | <a href="#">BC052346</a>           | <a href="#">66729</a>  | RIKEN cDNA 4921520G13 gene     | <a href="#">4921520G13Rik</a> | 1.085 | 1.179 | 0.275687  | 0.550593 |
| 4430 | 10541513 |                                    |                        |                                |                               | 1.085 | 1.251 | 0.250029  | 0.524217 |
| 4431 | 10503680 | <a href="#">NM_172688</a>          | <a href="#">26409</a>  | mitogen-activated protein kina | <a href="#">Map3k7</a>        | 1.085 | 0.796 | 0.451339  | 0.708496 |
| 4432 | 10566217 | <a href="#">NM_147082</a>          | <a href="#">259086</a> | olfactory receptor 609         | <a href="#">Olf609</a>        | 1.085 | 1.574 | 0.158169  | 0.405072 |
| 4433 | 10392063 | <a href="#">NM_172397</a>          | <a href="#">67803</a>  | LIM domain containing 2        | <a href="#">Limd2</a>         | 1.085 | 1.422 | 0.196699  | 0.457385 |
| 4434 | 10476596 | <a href="#">NM_001013802</a>       | <a href="#">72899</a>  | MACRO domain containing 2      | <a href="#">Macro2</a>        | 1.085 | 1.056 | 0.325233  | 0.601585 |
| 4435 | 10603417 | <a href="#">NM_008089</a>          | <a href="#">14460</a>  | GATA binding protein 1         | <a href="#">Gata1</a>         | 1.085 | 0.644 | 0.539394  | 0.77217  |
| 4436 | 10460580 | <a href="#">ENSMUST00000093445</a> | <a href="#">414115</a> | RIKEN cDNA D330050I16 gene     | <a href="#">D330050I16Rik</a> | 1.085 | 0.555 | 0.595553  | 0.809538 |

|      |          |                                    |                           |                                  |                                    |       |       |           |          |
|------|----------|------------------------------------|---------------------------|----------------------------------|------------------------------------|-------|-------|-----------|----------|
| 4437 | 10475350 | <a href="#">NM_011354</a>          | <a href="#">378702</a>    | small EDRK-rich factor 2         | <a href="#">Serl2</a>              | 1.085 | 1.42  | 0.197316  | 0.457905 |
| 4438 | 10559261 | <a href="#">NM_133655</a>          | <a href="#">12520</a>     | CD 81 antigen                    | <a href="#">Cd81</a>               | 1.085 | 0.899 | 0.397668  | 0.664302 |
| 4439 | 10598238 |                                    |                           |                                  |                                    | 1.085 | 0.503 | 0.629675  | 0.831325 |
| 4440 | 10545283 | <a href="#">NM_009762</a>          | <a href="#">12180</a>     | SET and MYND domain containing   | <a href="#">Smyd1</a>              | 1.085 | 1.196 | 0.269658  | 0.544449 |
| 4441 | 10471844 | <a href="#">NM_021606</a>          | <a href="#">59126</a>     | NIMA (never in mitosis gene a)   | <a href="#">Nek6</a>               | 1.085 | 0.876 | 0.409121  | 0.673396 |
| 4442 | 10460582 | <a href="#">NM_134149</a>          | <a href="#">107242</a>    | expressed sequence AI837181      | <a href="#">AI837181</a>           | 1.085 | 0.994 | 0.352297  | 0.625281 |
| 4443 | 10393944 | <a href="#">NM_009053</a>          | <a href="#">19719</a>     | RFNG O-fucosylpeptide 3-beta-N   | <a href="#">Rfng</a>               | 1.085 | 1.166 | 0.280889  | 0.556357 |
| 4444 | 10411456 | <a href="#">NM_026685</a>          | <a href="#">68344</a>     | transmembrane protein 174        | <a href="#">Tmem174</a>            | 1.085 | 0.613 | 0.558567  | 0.786256 |
| 4445 | 10397715 |                                    |                           |                                  |                                    | 1.085 | 1.063 | 0.322049  | 0.598804 |
| 4446 | 10455948 | <a href="#">NM_001081328</a>       | <a href="#">78923</a>     | chondroitin sulfate synthase 3   | <a href="#">Chsy3</a>              | 1.085 | 2.208 | 0.0619122 | 0.229974 |
| 4447 | 10430311 | <a href="#">BC107197</a>           | <a href="#">73376</a>     | RIKEN cDNA 1700061J05 gene       | <a href="#">1700061J05Rik</a>      | 1.085 | 1.764 | 0.119815  | 0.346027 |
| 4448 | 10380689 | <a href="#">NM_007622</a>          | <a href="#">12412</a>     | chromobox homolog 1 (Drosophila) | <a href="#">Cbx1</a>               | 1.085 | 1.645 | 0.142693  | 0.382882 |
| 4449 | 10395596 | <a href="#">NM_008241</a>          | <a href="#">15228</a>     | forkhead box G1                  | <a href="#">Foxg1</a>              | 1.085 | 1.642 | 0.143427  | 0.384029 |
| 4450 | 10408037 | <a href="#">NM_025719</a>          | <a href="#">66707</a>     | NFKB activating protein-like     | <a href="#">Nkapl</a>              | 1.085 | 0.545 | 0.601921  | 0.813436 |
| 4451 | 10345791 | <a href="#">NM_010743</a>          | <a href="#">17082</a>     | interleukin 1 receptor-like 1    | <a href="#">Il1rl1</a>             | 1.085 | 1.474 | 0.18279   | 0.439545 |
| 4452 | 10378114 | <a href="#">NM_025985</a>          | <a href="#">67128</a>     | ubiquitin-conjugating enzyme E   | <a href="#">Ube2g1</a>             | 1.085 | 1.396 | 0.204249  | 0.467434 |
| 4453 | 10430032 | <a href="#">NM_183091</a>          | <a href="#">72749</a>     | nuclear factor of kappa light    | <a href="#">Nfkbil2</a>            | 1.085 | 0.507 | 0.626955  | 0.83039  |
| 4454 | 10550365 | <a href="#">NM_178900</a>          | <a href="#">101540</a>    | protein kinase D2                | <a href="#">Prkd2</a>              | 1.085 | 0.952 | 0.372122  | 0.642455 |
| 4455 | 10410435 | <a href="#">NM_198600</a>          | <a href="#">210106</a>    | polymerase (DNA directed) sigma  | <a href="#">Pols</a>               | 1.085 | 1.232 | 0.256474  | 0.530714 |
| 4456 | 10441231 | <a href="#">AK148233</a>           | <a href="#">100038490</a> | predicted gene, ENSMUSG0000007   | <a href="#">ENSMUSG00000074891</a> | 1.085 | 1.06  | 0.32316   | 0.59983  |
| 4457 | 10596481 | <a href="#">NM_001110271</a>       | <a href="#">68644</a>     | abhydrolase domain containing    | <a href="#">Abhd14a</a>            | 1.084 | 1.76  | 0.120558  | 0.346982 |
| 4458 | 10350297 | <a href="#">NM_001081258</a>       | <a href="#">381293</a>    | kinesin family member 14         | <a href="#">Kif14</a>              | 1.084 | 1.486 | 0.17953   | 0.434921 |
| 4459 | 10556246 | <a href="#">NM_009281</a>          | <a href="#">20841</a>     | zinc finger protein 143          | <a href="#">Zfp143</a>             | 1.084 | 0.954 | 0.371125  | 0.641955 |
| 4460 | 10518833 | <a href="#">NM_001081557</a>       | <a href="#">100072</a>    | calmodulin binding transcripti   | <a href="#">Camta1</a>             | 1.084 | 1.411 | 0.199933  | 0.461707 |
| 4461 | 10434224 | <a href="#">BC029862</a>           | <a href="#">13972</a>     | guanine nucleotide binding pro   | <a href="#">Gnb11</a>              | 1.084 | 0.792 | 0.453672  | 0.710123 |
| 4462 | 10457205 | <a href="#">NM_001110856</a>       | <a href="#">12916</a>     | cAMP responsive element modula   | <a href="#">Crem</a>               | 1.084 | 1.582 | 0.156453  | 0.402488 |
| 4463 | 10469425 | <a href="#">NM_029466</a>          | <a href="#">75869</a>     | ADP-ribosylation factor-like 5   | <a href="#">Arl5b</a>              | 1.084 | 0.923 | 0.385636  | 0.654706 |
| 4464 | 10472313 | <a href="#">NM_009322</a>          | <a href="#">21375</a>     | T-box brain gene 1               | <a href="#">Tbr1</a>               | 1.084 | 1.41  | 0.200256  | 0.462199 |
| 4465 | 10515500 | <a href="#">NM_017377</a>          | <a href="#">53418</a>     | UDP-Gal:betaGlcNAc beta 1,4-g    | <a href="#">B4galt2</a>            | 1.084 | 1.563 | 0.160694  | 0.408331 |
| 4466 | 10502522 | <a href="#">NM_011828</a>          | <a href="#">23908</a>     | heparan sulfate 2-O-sulfotrans   | <a href="#">Hs2st1</a>             | 1.084 | 0.584 | 0.577026  | 0.797771 |
| 4467 | 10533323 | <a href="#">NM_172126</a>          | <a href="#">280668</a>    | a disintegrin and metalloprotei  | <a href="#">Adam1a</a>             | 1.084 | 1.157 | 0.283967  | 0.559215 |
| 4468 | 10445187 | <a href="#">NM_001038500</a>       | <a href="#">619517</a>    | predicted gene, EG619517         | <a href="#">EG619517</a>           | 1.084 | 1.603 | 0.151817  | 0.395645 |
| 4469 | 10379740 | <a href="#">NM_145432</a>          | <a href="#">217026</a>    | HEAT repeat containing 6         | <a href="#">Heatr6</a>             | 1.084 | 1.223 | 0.259738  | 0.534127 |
| 4470 | 10565255 | <a href="#">NM_030728</a>          | <a href="#">80982</a>     | RIKEN cDNA 9930013L23 gene       | <a href="#">9930013L23Rik</a>      | 1.084 | 1.869 | 0.10253   | 0.314141 |
| 4471 | 10522653 | <a href="#">ENSMUST00000086909</a> | <a href="#">320411</a>    | RIKEN cDNA A730089K16 gene       | <a href="#">A730089K16Rik</a>      | 1.084 | 0.829 | 0.433935  | 0.694402 |
| 4472 | 10368598 | <a href="#">NM_175448</a>          | <a href="#">215890</a>    | retinaldehyde binding protein    | <a href="#">Rlbp112</a>            | 1.084 | 0.178 | 0.863662  | 0.945728 |
| 4473 | 10580191 | <a href="#">NM_001081981</a>       | <a href="#">18032</a>     | nuclear factor I/X               | <a href="#">Nfix</a>               | 1.084 | 0.768 | 0.466989  | 0.719977 |
| 4474 | 10419892 | <a href="#">NM_010112</a>          | <a href="#">13644</a>     | embryonal Fyn-associated subst   | <a href="#">Efs</a>                | 1.084 | 0.796 | 0.451304  | 0.708496 |
| 4475 | 10413808 |                                    |                           |                                  |                                    | 1.084 | 0.325 | 0.754757  | 0.896801 |
| 4476 | 10557758 | <a href="#">NM_178029</a>          | <a href="#">233904</a>    | SET domain containing 1A         | <a href="#">Setd1a</a>             | 1.084 | 0.979 | 0.3592    | 0.63128  |
| 4477 | 10425880 | <a href="#">NM_146061</a>          | <a href="#">109270</a>    | Rho GTPase activating protein    | <a href="#">Arhgap8</a>            | 1.084 | 2.163 | 0.0662142 | 0.240143 |
| 4478 | 10598575 | <a href="#">NM_173414</a>          | <a href="#">236285</a>    | LanC lantibiotic synthetase co   | <a href="#">Lancl3</a>             | 1.084 | 0.991 | 0.353794  | 0.6265   |
| 4479 | 10404874 | <a href="#">NM_153789</a>          | <a href="#">218203</a>    | myosin regulatory light chain    | <a href="#">Mylip</a>              | 1.084 | 1.807 | 0.112445  | 0.332128 |
| 4480 | 10447120 | <a href="#">NM_026516</a>          | <a href="#">68027</a>     | transmembrane protein 178        | <a href="#">Tmem178</a>            | 1.084 | 1.349 | 0.218207  | 0.486274 |
| 4481 | 10484318 | <a href="#">NM_016965</a>          | <a href="#">50884</a>     | NCK-associated protein 1         | <a href="#">Nckap1</a>             | 1.084 | 0.95  | 0.372674  | 0.643093 |
| 4482 | 10404506 | <a href="#">NM_009068</a>          | <a href="#">19766</a>     | receptor (TNFRSF)-interacting    | <a href="#">Ripk1</a>              | 1.084 | 1.2   | 0.268195  | 0.542786 |
| 4483 | 10361828 | <a href="#">NM_010828</a>          | <a href="#">17684</a>     | Cbp/p300-interacting transacti   | <a href="#">Cited2</a>             | 1.084 | 0.721 | 0.493618  | 0.739168 |
| 4484 | 10381006 | <a href="#">NM_178060</a>          | <a href="#">21833</a>     | thyroid hormone receptor alpha   | <a href="#">Thra</a>               | 1.084 | 0.587 | 0.575118  | 0.797076 |
| 4485 | 10537169 | <a href="#">NM_009731</a>          | <a href="#">11997</a>     | aldo-keto reductase family 1,    | <a href="#">Akr1b7</a>             | 1.084 | 1.82  | 0.11024   | 0.328467 |
| 4486 | 10421817 | <a href="#">NM_025832</a>          | <a href="#">66897</a>     | NMDA receptor regulated 1-like   | <a href="#">Narg11</a>             | 1.084 | 0.719 | 0.494587  | 0.739625 |
| 4487 | 10392815 | <a href="#">NM_134158</a>          | <a href="#">140497</a>    | cDNA sequence AF251705           | <a href="#">AF251705</a>           | 1.084 | 1.492 | 0.178096  | 0.432735 |
|      |          |                                    |                           | RIKEN cDNA 1700019N12            |                                    |       |       |           |          |

|      |          |                                    |                        |                                |                               |       |       |           |          |
|------|----------|------------------------------------|------------------------|--------------------------------|-------------------------------|-------|-------|-----------|----------|
| 4488 | 10465494 | <a href="#">BC061075</a>           | <a href="#">67077</a>  | gene                           | <a href="#">1700019N12Rik</a> | 1.084 | 2.047 | 0.0787019 | 0.267021 |
| 4489 | 10483737 | <a href="#">NM_001025093</a>       | <a href="#">11909</a>  | activating transcription facto | <a href="#">Atf2</a>          | 1.084 | 1.537 | 0.166991  | 0.417902 |
| 4490 | 10375290 | <a href="#">NM_148673</a>          | <a href="#">193116</a> | SLU7 splicing factor homolog ( | <a href="#">Slu7</a>          | 1.084 | 0.608 | 0.561578  | 0.788656 |
| 4491 | 10407563 |                                    |                        |                                |                               | 1.084 | 1.093 | 0.309665  | 0.586555 |
| 4492 | 10542335 | <a href="#">NM_181444</a>          | <a href="#">232431</a> | G protein-coupled receptor, fa | <a href="#">Gprc5a</a>        | 1.084 | 1.476 | 0.182307  | 0.438828 |
| 4493 | 10362974 | <a href="#">NM_172473</a>          | <a href="#">209462</a> | HECT domain and ankyrin repeat | <a href="#">Hace1</a>         | 1.084 | 1.116 | 0.300303  | 0.576441 |
| 4494 | 10578123 | <a href="#">NM_019733</a>          | <a href="#">19663</a>  | RNA binding protein gene with  | <a href="#">Rbpms</a>         | 1.084 | 0.916 | 0.38918   | 0.65778  |
| 4495 | 10573261 | <a href="#">NM_024184</a>          | <a href="#">66929</a>  | ASF1 anti-silencing function 1 | <a href="#">Asf1b</a>         | 1.084 | 0.793 | 0.452842  | 0.709514 |
| 4496 | 10470149 | <a href="#">NM_007947</a>          | <a href="#">13863</a>  | lipocalin 5                    | <a href="#">Len5</a>          | 1.084 | 1.268 | 0.244315  | 0.51746  |
| 4497 | 10412435 | <a href="#">BC117955</a>           | <a href="#">245269</a> | RIKEN cDNA E130304F04 gene     | <a href="#">E130304F04Rik</a> | 1.084 | 1.256 | 0.248305  | 0.521677 |
| 4498 | 10468213 | <a href="#">ENSMUST00000065266</a> | <a href="#">75579</a>  | RIKEN cDNA 2310034G01 gene     | <a href="#">2310034G01Rik</a> | 1.083 | 1.465 | 0.18507   | 0.442657 |
| 4499 | 10357391 | <a href="#">NM_027678</a>          | <a href="#">226409</a> | zinc finger, RAN-binding domai | <a href="#">Zranb3</a>        | 1.083 | 1.335 | 0.222615  | 0.492542 |
| 4500 | 10365104 | <a href="#">BC119790</a>           | <a href="#">73822</a>  | RIKEN cDNA F630110N24 gene     | <a href="#">F630110N24Rik</a> | 1.083 | 1.411 | 0.199772  | 0.461487 |
| 4501 | 10418766 | <a href="#">NM_001024604</a>       | <a href="#">105522</a> | ankyrin repeat domain 28       | <a href="#">Ankrd28</a>       | 1.083 | 0.599 | 0.567248  | 0.792635 |
| 4502 | 10511703 | <a href="#">NM_138952</a>          | <a href="#">192656</a> | receptor (TNFRSF)-interacting  | <a href="#">Ripk2</a>         | 1.083 | 1.001 | 0.349314  | 0.622835 |
| 4503 | 10449207 | <a href="#">BC037132</a>           | <a href="#">215445</a> | RAB11 family interacting prote | <a href="#">Rab11fip3</a>     | 1.083 | 1.098 | 0.307524  | 0.584192 |
| 4504 | 10565786 | <a href="#">NM_177448</a>          | <a href="#">233549</a> | monoacylglycerol O-acyltransfe | <a href="#">Mogat2</a>        | 1.083 | 1.021 | 0.340426  | 0.61558  |
| 4505 | 10495763 | <a href="#">NM_008129</a>          | <a href="#">14630</a>  | glutamate-cysteine ligase , mo | <a href="#">Gelm</a>          | 1.083 | 0.406 | 0.696803  | 0.867016 |
| 4506 | 10434441 | <a href="#">NM_025462</a>          | <a href="#">107522</a> | endothelin converting enzyme 2 | <a href="#">Ece2</a>          | 1.083 | 0.381 | 0.714073  | 0.874842 |
| 4507 | 10458195 | <a href="#">NM_009860</a>          | <a href="#">12532</a>  | cell division cycle 25 homolog | <a href="#">Cdc25c</a>        | 1.083 | 1.086 | 0.31251   | 0.588871 |
| 4508 | 10576034 | <a href="#">NM_008320</a>          | <a href="#">15900</a>  | interferon regulatory factor 8 | <a href="#">Irf8</a>          | 1.083 | 1.494 | 0.177548  | 0.432048 |
| 4509 | 10359754 | <a href="#">NM_001083897</a>       | <a href="#">68481</a>  | myelin protein zero-like 1     | <a href="#">Mpzl1</a>         | 1.083 | 1.763 | 0.120006  | 0.34645  |
| 4510 | 10571444 | <a href="#">NM_007514</a>          | <a href="#">11988</a>  | solute carrier family 7 (catio | <a href="#">Slc7a2</a>        | 1.083 | 0.152 | 0.8833    | 0.95405  |
| 4511 | 10588731 | <a href="#">NM_009074</a>          | <a href="#">19882</a>  | macrophage stimulating 1 recep | <a href="#">Mst1r</a>         | 1.083 | 1.598 | 0.152712  | 0.396774 |
| 4512 | 10397054 | <a href="#">NM_030246</a>          | <a href="#">73828</a>  | WD repeat domain 21            | <a href="#">Wdr21</a>         | 1.083 | 0.84  | 0.42791   | 0.689167 |
| 4513 | 10375634 | <a href="#">NM_016961</a>          | <a href="#">26420</a>  | mitogen-activated protein kina | <a href="#">Mapk9</a>         | 1.083 | 0.462 | 0.65781   | 0.846971 |
| 4514 | 10516706 | <a href="#">NM_011317</a>          | <a href="#">20218</a>  | KH domain containing, RNA bind | <a href="#">Khdrbs1</a>       | 1.083 | 1.62  | 0.148047  | 0.390187 |
| 4515 | 10361055 | <a href="#">NM_144879</a>          | <a href="#">226841</a> | vasohibin 2                    | <a href="#">Vash2</a>         | 1.083 | 0.573 | 0.583767  | 0.801609 |
| 4516 | 10494227 | <a href="#">NM_029789</a>          | <a href="#">76893</a>  | LAG1 homolog, ceramide synthas | <a href="#">Lass2</a>         | 1.083 | 0.389 | 0.708368  | 0.872343 |
| 4517 | 10351298 | <a href="#">NM_001081126</a>       | <a href="#">240888</a> | G protein-coupled receptor 161 | <a href="#">Gpr161</a>        | 1.083 | 1.655 | 0.14056   | 0.379276 |
| 4518 | 10581363 | <a href="#">NM_177150</a>          | <a href="#">320394</a> | centromere protein T           | <a href="#">Cenpt</a>         | 1.083 | 0.892 | 0.401151  | 0.666661 |
| 4519 | 10489038 | <a href="#">NM_020255</a>          | <a href="#">19018</a>  | SCAN domain-containing 1       | <a href="#">Scand1</a>        | 1.083 | 0.567 | 0.588216  | 0.804948 |
| 4520 | 10379957 | <a href="#">NM_029788</a>          | <a href="#">76892</a>  | ring finger protein, transmemb | <a href="#">Rnft1</a>         | 1.083 | 1.015 | 0.342987  | 0.617132 |
| 4521 | 10589535 | <a href="#">NM_008694</a>          | <a href="#">18054</a>  | neutrophilic granule protein   | <a href="#">Ngp</a>           | 1.083 | 0.964 | 0.366101  | 0.637106 |
| 4522 | 10441313 | <a href="#">BC043688</a>           | <a href="#">207781</a> | RIKEN cDNA 5830404H04 gene     | <a href="#">5830404H04Rik</a> | 1.083 | 1.037 | 0.333111  | 0.609187 |
| 4523 | 10474093 | <a href="#">BC022909</a>           | <a href="#">66457</a>  | RIKEN cDNA 2810002D19 gene     | <a href="#">2810002D19Rik</a> | 1.083 | 0.915 | 0.389682  | 0.658311 |
| 4524 | 10405047 | <a href="#">NM_025711</a>          | <a href="#">66695</a>  | asporin                        | <a href="#">Aspn</a>          | 1.083 | 0.08  | 0.938032  | 0.975903 |
| 4525 | 10595856 | <a href="#">NM_138756</a>          | <a href="#">192287</a> | solute carrier family 25, memb | <a href="#">Slc25a36</a>      | 1.083 | 0.935 | 0.379854  | 0.64965  |
| 4526 | 10371591 | <a href="#">NM_029249</a>          | <a href="#">75317</a>  | RIKEN cDNA 4930547N16 gene     | <a href="#">4930547N16Rik</a> | 1.083 | 0.673 | 0.521979  | 0.759008 |
| 4527 | 10375019 | <a href="#">NM_008741</a>          | <a href="#">18197</a>  | neuron specific gene family me | <a href="#">Nsg2</a>          | 1.083 | 0.976 | 0.360867  | 0.632578 |
| 4528 | 10606475 | <a href="#">NM_001080549</a>       | <a href="#">245596</a> | highly divergent homeobox      | <a href="#">Hdx</a>           | 1.083 | 0.729 | 0.489126  | 0.736349 |
| 4529 | 10556111 | <a href="#">NM_001005488</a>       | <a href="#">257919</a> | olfactory receptor 467         | <a href="#">Olfr467</a>       | 1.083 | 1.435 | 0.193243  | 0.452533 |
| 4530 | 10454447 | <a href="#">NM_172965</a>          | <a href="#">269003</a> | Sin3A associated protein       | <a href="#">Sap130</a>        | 1.083 | 1.199 | 0.268445  | 0.542795 |
| 4531 | 10429859 | <a href="#">NM_153122</a>          | <a href="#">75475</a>  | 5-oxoprolinase (ATP-hydrolysin | <a href="#">Oplah</a>         | 1.083 | 1.761 | 0.120342  | 0.34671  |
| 4532 | 10510127 | <a href="#">NM_001081248</a>       | <a href="#">435815</a> | similar to arylacetamide deace | <a href="#">RP23-139B20.1</a> | 1.083 | 1.156 | 0.28438   | 0.559618 |
| 4533 | 10387699 | <a href="#">NM_153788</a>          | <a href="#">216859</a> | centaurin, beta 1              | <a href="#">Centb1</a>        | 1.083 | 2     | 0.0843567 | 0.278694 |
| 4534 | 10350516 | <a href="#">NM_011198</a>          | <a href="#">19225</a>  | prostaglandin-endoperoxide syn | <a href="#">Ptgs2</a>         | 1.083 | 0.806 | 0.445851  | 0.703765 |
| 4535 | 10351525 | <a href="#">NM_008623</a>          | <a href="#">17528</a>  | myelin protein zero            | <a href="#">Mpz</a>           | 1.083 | 1.14  | 0.290885  | 0.567072 |
| 4536 | 10573823 | <a href="#">NM_177224</a>          | <a href="#">109151</a> | chromodomain helicase DNA bind | <a href="#">Chd9</a>          | 1.083 | 1.315 | 0.228825  | 0.499925 |

|      |          |                                    |                        |                                 |                                    |       |       |          |          |
|------|----------|------------------------------------|------------------------|---------------------------------|------------------------------------|-------|-------|----------|----------|
| 4537 | 10422185 | <a href="#">NM_026047</a>          | <a href="#">72486</a>  | ring finger protein 219         | <a href="#">Rnf219</a>             | 1.083 | 1.48  | 0.181193 | 0.437195 |
| 4538 | 10535021 | <a href="#">NM_172412</a>          | <a href="#">71951</a>  | glypican 2 (cerebroglycan)      | <a href="#">Gpc2</a>               | 1.082 | 1.666 | 0.138426 | 0.376399 |
| 4539 | 10574632 | <a href="#">NM_022309</a>          | <a href="#">12400</a>  | core binding factor beta        | <a href="#">Cbfb</a>               | 1.082 | 1.239 | 0.254077 | 0.528397 |
| 4540 | 10557560 | <a href="#">NM_138754</a>          | <a href="#">52858</a>  | CDP-diacylglycerol--inositol 3  | <a href="#">Cdipt</a>              | 1.082 | 0.79  | 0.454818 | 0.711187 |
| 4541 | 10515694 | <a href="#">ENSMUST00000075406</a> | <a href="#">230676</a> | cDNA sequence BC059842          | <a href="#">BC059842</a>           | 1.082 | 0.502 | 0.630558 | 0.831653 |
| 4542 | 10485594 | <a href="#">NM_001033768</a>       | <a href="#">241593</a> | predicted gene, OTTMUSG0000001  | <a href="#">OTTMUSG00000014964</a> | 1.082 | 1.501 | 0.175887 | 0.429588 |
| 4543 | 10380823 | <a href="#">NM_010688</a>          | <a href="#">16796</a>  | LIM and SH3 protein 1           | <a href="#">Lasp1</a>              | 1.082 | 1.171 | 0.278704 | 0.553637 |
| 4544 | 10574899 | <a href="#">NM_026532</a>          | <a href="#">68051</a>  | nuclear transport factor 2      | <a href="#">Nutf2</a>              | 1.082 | 0.758 | 0.472284 | 0.72404  |
| 4545 | 10463645 | <a href="#">NM_015752</a>          | <a href="#">24069</a>  | suppressor of fused homolog (D) | <a href="#">Sufu</a>               | 1.082 | 1.052 | 0.32667  | 0.602834 |
| 4546 | 10501593 | <a href="#">NM_023214</a>          | <a href="#">66500</a>  | solute carrier family 30 (zinc  | <a href="#">Slc30a7</a>            | 1.082 | 0.727 | 0.49001  | 0.737262 |
| 4547 | 10359917 | <a href="#">NM_010476</a>          | <a href="#">15490</a>  | hydroxysteroid (17-beta) dehyd  | <a href="#">Hsd17b7</a>            | 1.082 | 0.34  | 0.743529 | 0.89082  |
| 4548 | 10443421 | <a href="#">NM_001081315</a>       | <a href="#">268936</a> | bromodomain and PHD finger con  | <a href="#">Brpf3</a>              | 1.082 | 1.396 | 0.204143 | 0.467365 |
| 4549 | 10485309 | <a href="#">ENSMUST00000099688</a> | <a href="#">414123</a> | RIKEN cDNA E530001K10 gene      | <a href="#">E530001K10Rik</a>      | 1.082 | 1.063 | 0.321892 | 0.598705 |
| 4550 | 10494085 | <a href="#">NM_019414</a>          | <a href="#">20342</a>  | selenium binding protein 2      | <a href="#">Selenbp2</a>           | 1.082 | 1.567 | 0.159798 | 0.407118 |
| 4551 | 10435067 | <a href="#">NM_199309</a>          | <a href="#">245308</a> | zinc finger, DHHC domain conta  | <a href="#">Zdhhc19</a>            | 1.082 | 1.061 | 0.323092 | 0.59983  |
| 4552 | 10421877 | <a href="#">NM_019670</a>          | <a href="#">56419</a>  | diaphanous homolog 3 (Drosophi  | <a href="#">Diap3</a>              | 1.082 | 1.258 | 0.247603 | 0.520853 |
| 4553 | 10345387 | <a href="#">NM_009355</a>          | <a href="#">21755</a>  | testicular serine protease 1    | <a href="#">Tesp1</a>              | 1.082 | 1.014 | 0.343394 | 0.617488 |
| 4554 | 10545135 | <a href="#">NM_008354</a>          | <a href="#">16162</a>  | interleukin 12 receptor, beta   | <a href="#">Il12rb2</a>            | 1.082 | 1.394 | 0.204822 | 0.4682   |
| 4555 | 10591844 | <a href="#">AK029497</a>           | <a href="#">320752</a> | dpy-19-like 2 (C. elegans)      | <a href="#">Dpy19l2</a>            | 1.082 | 1.022 | 0.339783 | 0.615188 |
| 4556 | 10446376 | <a href="#">NM_008549</a>          | <a href="#">17158</a>  | mannosidase 2, alpha 1          | <a href="#">Man2a1</a>             | 1.082 | 0.712 | 0.498947 | 0.742429 |
| 4557 | 10509992 | <a href="#">NM_013868</a>          | <a href="#">29818</a>  | heat shock protein family, mem  | <a href="#">Hspb7</a>              | 1.082 | 1.371 | 0.211441 | 0.476926 |
| 4558 | 10500100 | <a href="#">NM_027206</a>          | <a href="#">69769</a>  | tumor necrosis factor, alpha-i  | <a href="#">Tnfaip8l2</a>          | 1.082 | 1.309 | 0.230613 | 0.501552 |
| 4559 | 10550047 | <a href="#">NM_001001447</a>       | <a href="#">232878</a> | zinc finger and SCAN domain co  | <a href="#">Zscan22</a>            | 1.082 | 0.821 | 0.438108 | 0.697167 |
| 4560 | 10581507 | <a href="#">NM_139229</a>          | <a href="#">97484</a>  | component of oligomeric golgi   | <a href="#">Cog8</a>               | 1.082 | 1.018 | 0.341505 | 0.616178 |
| 4561 | 10553568 | <a href="#">NM_146190</a>          | <a href="#">233276</a> | tubulin, gamma complex associa  | <a href="#">Tubgcp5</a>            | 1.082 | 0.514 | 0.622561 | 0.827273 |
| 4562 | 10433179 | <a href="#">NM_009268</a>          | <a href="#">20771</a>  | salivary protein 2              | <a href="#">Spt2</a>               | 1.082 | 1.445 | 0.190525 | 0.449454 |
| 4563 | 10520109 |                                    |                        |                                 |                                    | 1.082 | 0.273 | 0.79262  | 0.91549  |
| 4564 | 10434869 | <a href="#">NM_026202</a>          | <a href="#">67501</a>  | coiled-coil domain containing   | <a href="#">Ccde50</a>             | 1.082 | 1.479 | 0.181361 | 0.437401 |
| 4565 | 10421227 | <a href="#">BC021475</a>           | <a href="#">219158</a> | RIKEN cDNA 2610301G19 gene      | <a href="#">2610301G19Rik</a>      | 1.082 | 1.188 | 0.272609 | 0.547117 |
| 4566 | 10360858 | <a href="#">NM_178692</a>          | <a href="#">226777</a> | RIKEN cDNA C130074G19 gene      | <a href="#">C130074G19Rik</a>      | 1.082 | 1.04  | 0.33197  | 0.608173 |
| 4567 | 10459705 | <a href="#">NM_008540</a>          | <a href="#">17128</a>  | MAD homolog 4 (Drosophila)      | <a href="#">Smad4</a>              | 1.082 | 0.958 | 0.369154 | 0.639859 |
| 4568 | 10574242 | <a href="#">NM_009090</a>          | <a href="#">20021</a>  | polymerase (RNA) II (DNA direc  | <a href="#">Polr2c</a>             | 1.082 | 1.636 | 0.144683 | 0.385967 |
| 4569 | 10401114 | <a href="#">NM_134050</a>          | <a href="#">104886</a> | RAB15, member RAS oncogene fam  | <a href="#">Rab15</a>              | 1.082 | 1.213 | 0.26336  | 0.538069 |
| 4570 | 10434003 | <a href="#">NM_007764</a>          | <a href="#">12929</a>  | v-crk sarcoma virus CT10 oncog  | <a href="#">Crkl</a>               | 1.081 | 1.142 | 0.290121 | 0.566261 |
| 4571 | 10423919 | <a href="#">AK016133</a>           | <a href="#">620121</a> | RIKEN cDNA 4930555K19 gene      | <a href="#">4930555K19Rik</a>      | 1.081 | 0.725 | 0.491286 | 0.737713 |
| 4572 | 10473217 |                                    |                        |                                 |                                    | 1.081 | 0.774 | 0.463367 | 0.717662 |
| 4573 | 10495562 | <a href="#">NM_175413</a>          | <a href="#">109245</a> | leucine rich repeat containing  | <a href="#">Lrrc39</a>             | 1.081 | 1.326 | 0.225291 | 0.495384 |
| 4574 | 10544499 | <a href="#">AK080300</a>           | <a href="#">320946</a> | RIKEN cDNA A930035D04 gene      | <a href="#">A930035D04Rik</a>      | 1.081 | 1.074 | 0.317579 | 0.594733 |
| 4575 | 10443063 | <a href="#">NM_009343</a>          | <a href="#">21652</a>  | PHD finger protein 1            | <a href="#">Phf1</a>               | 1.081 | 1.28  | 0.240333 | 0.513397 |
| 4576 | 10481827 | <a href="#">NM_001085507</a>       | <a href="#">241311</a> | zinc finger and BTB domain con  | <a href="#">Zbtb34</a>             | 1.081 | 1.56  | 0.161433 | 0.409623 |
| 4577 | 10597493 | <a href="#">NM_024222</a>          | <a href="#">68292</a>  | STT3, subunit of the oligosacc  | <a href="#">Stt3b</a>              | 1.081 | 1.449 | 0.189295 | 0.447652 |
| 4578 | 10393936 | <a href="#">NM_007621</a>          | <a href="#">12409</a>  | carbonyl reductase 2            | <a href="#">Cbr2</a>               | 1.081 | 1.189 | 0.272286 | 0.546899 |
| 4579 | 10508368 | <a href="#">NM_001009819</a>       | <a href="#">215493</a> | alpha 1,3-galactosyltransferas  | <a href="#">A3galt2</a>            | 1.081 | 1.433 | 0.193636 | 0.453103 |
| 4580 | 10568897 | <a href="#">NM_133755</a>          | <a href="#">74237</a>  | tubulin, gamma complex associa  | <a href="#">Tubgcp2</a>            | 1.081 | 0.85  | 0.422538 | 0.684818 |
| 4581 | 10347335 | <a href="#">NM_013612</a>          | <a href="#">18173</a>  | solute carrier family 11 (prot  | <a href="#">Slc11a1</a>            | 1.081 | 1.561 | 0.161238 | 0.409319 |
| 4582 | 10427675 | <a href="#">NM_177123</a>          | <a href="#">320277</a> | sperm flagellar 2               | <a href="#">Spef2</a>              | 1.081 | 0.892 | 0.4014   | 0.666762 |
| 4583 | 10503251 | <a href="#">NM_026005</a>          | <a href="#">67157</a>  | RIKEN cDNA 2610301B20 gene      | <a href="#">2610301B20Rik</a>      | 1.081 | 1.632 | 0.145475 | 0.387083 |
| 4584 | 10425686 | <a href="#">NM_172428</a>          | <a href="#">76457</a>  | coiled-coil domain containing   | <a href="#">Ccde134</a>            | 1.081 | 1.168 | 0.280073 | 0.55551  |
| 4585 | 10378068 | <a href="#">NM_001037713</a>       | <a href="#">227059</a> | XIAP associated factor 1        | <a href="#">Xafi</a>               | 1.081 | 0.627 | 0.552054 | 0.782578 |

| 4586 | 10466682 | <a href="#">NM_153808</a>          | <a href="#">226026</a>    | structural maintenance of chro   | <a href="#">Smc5</a>               | 1.081 | 1.096 | 0.30833   | 0.585061 |
|------|----------|------------------------------------|---------------------------|----------------------------------|------------------------------------|-------|-------|-----------|----------|
| 4587 | 10445412 | <a href="#">NM_008690</a>          | <a href="#">18037</a>     | nuclear factor of kappa light    | <a href="#">Nfkbie</a>             | 1.081 | 1.726 | 0.126818  | 0.356718 |
| 4588 | 10588849 | <a href="#">NM_177275</a>          | <a href="#">320844</a>    | adhesion molecule with Ig like   | <a href="#">Amigo3</a>             | 1.081 | 1.028 | 0.337333  | 0.612974 |
| 4589 | 10444821 | <a href="#">NM_023124</a>          | <a href="#">15019</a>     | histocompatibility 2, Q region   | <a href="#">H2-Q8</a>              | 1.081 | 2.012 | 0.0828858 | 0.275729 |
| 4590 | 10355611 | <a href="#">NM_029888</a>          | <a href="#">77264</a>     | zinc finger protein 142          | <a href="#">Zfp142</a>             | 1.081 | 1.664 | 0.138881  | 0.376958 |
| 4591 | 10460616 | <a href="#">NM_007687</a>          | <a href="#">12631</a>     | cofilin 1, non-muscle            | <a href="#">Cfil1</a>              | 1.081 | 1.172 | 0.278598  | 0.553531 |
| 4592 | 10392070 | <a href="#">NM_028126</a>          | <a href="#">72149</a>     | RIKEN cDNA 2610019A05 gene       | <a href="#">2610019A05Rik</a>      | 1.081 | 0.923 | 0.385659  | 0.654706 |
| 4593 | 10591228 | <a href="#">NM_011753</a>          | <a href="#">22688</a>     | zinc finger protein 26           | <a href="#">Zfp26</a>              | 1.081 | 0.744 | 0.480379  | 0.729941 |
| 4594 | 10480541 | <a href="#">NM_001012518</a>       | <a href="#">77683</a>     | euchromatic histone methyltran   | <a href="#">Ehmt1</a>              | 1.081 | 0.927 | 0.383912  | 0.653352 |
| 4595 | 10347970 | <a href="#">NM_133781</a>          | <a href="#">12283</a>     | calcium binding protein 39       | <a href="#">Cab39</a>              | 1.081 | 0.723 | 0.492593  | 0.738532 |
| 4596 | 10382336 | <a href="#">ENSMUST00000020950</a> | <a href="#">71203</a>     | RIKEN cDNA 4933434M16 gene       | <a href="#">4933434M16Rik</a>      | 1.081 | 0.617 | 0.556131  | 0.784723 |
| 4597 | 10523674 | <a href="#">NM_028794</a>          | <a href="#">74167</a>     | nudix (nucleoside diphosphate    | <a href="#">Nudt9</a>              | 1.081 | 0.81  | 0.443948  | 0.702635 |
| 4598 | 10366667 | <a href="#">NM_029364</a>          | <a href="#">75612</a>     | glucosamine (N-acetyl)-6-sulfa   | <a href="#">Gns</a>                | 1.081 | 1.039 | 0.332317  | 0.608356 |
| 4599 | 10490986 | <a href="#">BC023403</a>           | <a href="#">70808</a>     | RIKEN cDNA 4632415L05 gene       | <a href="#">4632415L05Rik</a>      | 1.081 | 0.511 | 0.624844  | 0.828987 |
| 4600 | 10370303 | <a href="#">NR_004429</a>          | <a href="#">110532</a>    | adenosine deaminase, RNA-speci   | <a href="#">Adarb1</a>             | 1.08  | 1.218 | 0.261637  | 0.536103 |
| 4601 | 10598138 | <a href="#">NM_001030293</a>       | <a href="#">236576</a>    | sprouty homolog 3 (Drosophila)   | <a href="#">Spry3</a>              | 1.08  | 1.7   | 0.131751  | 0.364648 |
| 4602 | 10367803 |                                    |                           |                                  |                                    | 1.08  | 0.367 | 0.724413  | 0.880611 |
| 4603 | 10408529 |                                    |                           |                                  |                                    | 1.08  | 1.112 | 0.30186   | 0.577905 |
| 4604 | 10575799 | <a href="#">NM_172285</a>          | <a href="#">234779</a>    | phospholipase C, gamma 2         | <a href="#">Plcg2</a>              | 1.08  | 1.614 | 0.1493    | 0.391663 |
| 4605 | 10496251 | <a href="#">NM_027208</a>          | <a href="#">69772</a>     | 3-hydroxybutyrate dehydrogenas   | <a href="#">Bdh2</a>               | 1.08  | 0.322 | 0.756662  | 0.897871 |
| 4606 | 10345913 | <a href="#">NM_010879</a>          | <a href="#">17974</a>     | non-catalytic region of tyrosi   | <a href="#">Nck2</a>               | 1.08  | 0.856 | 0.419766  | 0.682051 |
| 4607 | 10432957 | <a href="#">NM_013566</a>          | <a href="#">16421</a>     | integrin beta 7                  | <a href="#">Itgb7</a>              | 1.08  | 1.457 | 0.187192  | 0.445619 |
| 4608 | 10584604 | <a href="#">NM_023655</a>          | <a href="#">72169</a>     | tripartite motif-containing 29   | <a href="#">Trim29</a>             | 1.08  | 1.276 | 0.241581  | 0.5144   |
| 4609 | 10384717 | <a href="#">NM_023651</a>          | <a href="#">72129</a>     | peroxisomal biogenesis factor    | <a href="#">Pex13</a>              | 1.08  | 1.002 | 0.348869  | 0.622541 |
| 4610 | 10359867 | <a href="#">NM_001013382</a>       | <a href="#">240899</a>    | leucine rich repeat containing   | <a href="#">Lrrc52</a>             | 1.08  | 1.32  | 0.22731   | 0.498027 |
| 4611 | 10508992 | <a href="#">NM_027995</a>          | <a href="#">71904</a>     | progesterone and adipoQ receptor | <a href="#">Paqr7</a>              | 1.08  | 0.794 | 0.452352  | 0.708922 |
| 4612 | 10550593 | <a href="#">NM_011383</a>          | <a href="#">20475</a>     | sine oculis-related homeobox 5   | <a href="#">Six5</a>               | 1.08  | 0.498 | 0.633268  | 0.833255 |
| 4613 | 10404531 | <a href="#">NM_001101430</a>       | <a href="#">69666</a>     | proteasome (prosome, macropain)  | <a href="#">Psmg4</a>              | 1.08  | 0.115 | 0.911513  | 0.964659 |
| 4614 | 10369264 | <a href="#">NM_010959</a>          | <a href="#">18302</a>     | oncoprotein induced transcript   | <a href="#">Oit3</a>               | 1.08  | 1.93  | 0.0937263 | 0.29698  |
| 4615 | 10388847 | <a href="#">NM_172795</a>          | <a href="#">237868</a>    | sterile alpha and HEAT/Armadi    | <a href="#">Sarm1</a>              | 1.08  | 1.475 | 0.182368  | 0.438828 |
| 4616 | 10562523 | <a href="#">BC050041</a>           | <a href="#">668501</a>    | zinc finger protein 507          | <a href="#">zfp507</a>             | 1.08  | 1.001 | 0.349043  | 0.622715 |
| 4617 | 10520126 | <a href="#">NM_008713</a>          | <a href="#">18127</a>     | nitric oxide synthase 3, endot   | <a href="#">Nos3</a>               | 1.08  | 1.019 | 0.340993  | 0.615921 |
| 4618 | 10384780 | <a href="#">AK135532</a>           | <a href="#">100038580</a> | predicted gene, ENSMUSG00000007  | <a href="#">ENSMUSG00000073100</a> | 1.08  | 0.989 | 0.354555  | 0.627182 |
| 4619 | 10499906 | <a href="#">NM_008574</a>          | <a href="#">17235</a>     | sperm mitochondria-associated    | <a href="#">Smcp</a>               | 1.08  | 1.149 | 0.2873    | 0.562985 |
| 4620 | 10546533 |                                    |                           |                                  |                                    | 1.08  | 1.22  | 0.260941  | 0.535507 |
| 4621 | 10574985 | <a href="#">NM_178798</a>          | <a href="#">330836</a>    | solute carrier family 7 (catio   | <a href="#">Slc7a6</a>             | 1.08  | 1.193 | 0.270813  | 0.545372 |
| 4622 | 10469622 | <a href="#">NM_001004761</a>       | <a href="#">241263</a>    | G protein-coupled receptor 158   | <a href="#">Gpr158</a>             | 1.08  | 1.052 | 0.326632  | 0.602834 |
| 4623 | 10441003 | <a href="#">NM_001111023</a>       | <a href="#">12394</a>     | runt related transcription fac   | <a href="#">Runx1</a>              | 1.08  | 0.826 | 0.435138  | 0.695306 |
| 4624 | 10542112 | <a href="#">NM_053165</a>          | <a href="#">94071</a>     | C-type lectin domain family 2,   | <a href="#">Clec2h</a>             | 1.08  | 2.114 | 0.0711772 | 0.250619 |
| 4625 | 10366848 | <a href="#">NM_008080</a>          | <a href="#">14421</a>     | beta-1,4-N-acetyl-galactosamin   | <a href="#">B4galnt1</a>           | 1.08  | 1.388 | 0.206501  | 0.470907 |
| 4626 | 10510876 | <a href="#">ENSMUST00000071251</a> | <a href="#">230971</a>    | multiple EGF-like-domains 6      | <a href="#">Megf6</a>              | 1.08  | 1.069 | 0.319509  | 0.596487 |
| 4627 | 10363082 | <a href="#">NM_013532</a>          | <a href="#">14728</a>     | leukocyte immunoglobulin-like    | <a href="#">Lilrb4</a>             | 1.08  | 1.702 | 0.131364  | 0.364031 |
| 4628 | 10490611 | <a href="#">NM_009184</a>          | <a href="#">20459</a>     | PTK6 protein tyrosine kinase 6   | <a href="#">Ptk6</a>               | 1.08  | 0.974 | 0.361523  | 0.633294 |
| 4629 | 10455531 | <a href="#">ENSMUST00000037090</a> | <a href="#">100047191</a> | hypothetical protein LOC100047   | <a href="#">LOC100047191</a>       | 1.08  | 0.769 | 0.466522  | 0.719642 |
| 4630 | 10594631 | <a href="#">NM_177583</a>          | <a href="#">208117</a>    | anterior pharynx defective 1b    | <a href="#">Aph1b</a>              | 1.08  | 1.306 | 0.231621  | 0.502487 |
| 4631 | 10441660 | <a href="#">NM_013682</a>          | <a href="#">21331</a>     | brachyury 2                      | <a href="#">T2</a>                 | 1.08  | 1.23  | 0.257132  | 0.531457 |
| 4632 | 10448912 | <a href="#">NM_011665</a>          | <a href="#">22196</a>     | ubiquitin-conjugating enzyme E   | <a href="#">Ube2i</a>              | 1.08  | 1.219 | 0.261104  | 0.535634 |
| 4633 | 10490159 | <a href="#">NM_022995</a>          | <a href="#">65112</a>     | prostate transmembrane protein   | <a href="#">Pmepal</a>             | 1.08  | 1.412 | 0.199634  | 0.461419 |
| 4634 | 10412421 | <a href="#">NM_028245</a>          | <a href="#">72465</a>     | zinc finger protein 131          | <a href="#">Zfp131</a>             | 1.08  | 0.972 | 0.362297  | 0.633772 |
| 4635 | 10347310 | <a href="#">NM_001039509</a>       | <a href="#">56695</a>     | paroxysmal nonkinesinogenic dys  | <a href="#">Pnkd</a>               | 1.079 | 1.265 | 0.245063  | 0.518209 |
| 4636 | 10416419 | <a href="#">ENSMUST00000100386</a> | <a href="#">100038618</a> | predicted gene, ENSMUSG00000007  | <a href="#">ENSMUSG00000075519</a> | 1.079 | 0.433 | 0.677929  | 0.856898 |
| 4637 | 10462454 | <a href="#">NM_144873</a>          | <a href="#">109113</a>    | ubiquitin-like, containing PHD   | <a href="#">Uhrf2</a>              | 1.079 | 0.973 | 0.362061  | 0.633596 |
| 4638 | 10345190 | <a href="#">NM_153601</a>          | <a href="#">266744</a>    | glutamate-ammonia liase (glut    | <a href="#">Gld1</a>               | 1.079 | 0.5   | 0.631755  | 0.832710 |



|      |          |                                    |                           |                                |                                    |       |       |          |          |
|------|----------|------------------------------------|---------------------------|--------------------------------|------------------------------------|-------|-------|----------|----------|
| 4691 | 10405835 | <a href="#">XR_033589</a>          | <a href="#">238678</a>    | similar to Methylmalonic acidu | <a href="#">LOC238678</a>          | 1.077 | 1.662 | 0.139286 | 0.377524 |
| 4692 | 10425016 | <a href="#">NM_025536</a>          | <a href="#">66398</a>     | COMM domain containing 5       | <a href="#">Comm5</a>              | 1.077 | 0.508 | 0.626809 | 0.83034  |
| 4693 | 10432527 | <a href="#">NM_028015</a>          | <a href="#">71949</a>     | LAG1 homolog, ceramide synthas | <a href="#">Lass5</a>              | 1.077 | 0.897 | 0.398747 | 0.664967 |
| 4694 | 10561461 | <a href="#">NM_175021</a>          | <a href="#">233033</a>    | sterile alpha motif domain con | <a href="#">Samd4b</a>             | 1.077 | 1.57  | 0.159262 | 0.406366 |
| 4695 | 10510982 | <a href="#">NM_001042407</a>       | <a href="#">668173</a>    | peroxisome biogenesis factor 1 | <a href="#">Pex10</a>              | 1.077 | 1.202 | 0.267323 | 0.541978 |
| 4696 | 10371141 | <a href="#">NM_010440</a>          | <a href="#">15353</a>     | high mobility group 20 B       | <a href="#">Hmg20b</a>             | 1.077 | 1.8   | 0.113654 | 0.334228 |
| 4697 | 10446425 |                                    |                           |                                |                                    | 1.077 | 0.545 | 0.602138 | 0.813626 |
| 4698 | 10596545 | <a href="#">NM_030730</a>          | <a href="#">81000</a>     | Rad54 like 2 (S. cerevisiae)   | <a href="#">Rad54I2</a>            | 1.077 | 0.577 | 0.581676 | 0.800424 |
| 4699 | 10396831 | <a href="#">NM_009705</a>          | <a href="#">11847</a>     | arginase type II               | <a href="#">Arg2</a>               | 1.077 | 0.832 | 0.432185 | 0.692545 |
| 4700 | 10412978 | <a href="#">AK007938</a>           | <a href="#">75602</a>     | RIKEN cDNA 1810062O18 gene     | <a href="#">1810062O18Rik</a>      | 1.077 | 0.679 | 0.518476 | 0.757012 |
| 4701 | 10468869 | <a href="#">NM_007452</a>          | <a href="#">11757</a>     | peroxiredoxin 3                | <a href="#">Prdx3</a>              | 1.077 | 0.442 | 0.671464 | 0.854195 |
| 4702 | 10348354 | <a href="#">NM_201644</a>          | <a href="#">394434</a>    | UDP glucuronosyltransferase 1  | <a href="#">Ugt1a9</a>             | 1.077 | 1.745 | 0.12318  | 0.351285 |
| 4703 | 10453616 | <a href="#">NM_026157</a>          | <a href="#">67440</a>     | PAP associated domain containi | <a href="#">Papd1</a>              | 1.077 | 0.604 | 0.56446  | 0.790721 |
| 4704 | 10392735 | <a href="#">NM_020006</a>          | <a href="#">56699</a>     | CDC42 effector protein (Rho GT | <a href="#">Cdc42ep4</a>           | 1.077 | 0.703 | 0.504256 | 0.746511 |
| 4705 | 10513952 | <a href="#">BC022621</a>           | <a href="#">66928</a>     | RIKEN cDNA 3110001D03 gene     | <a href="#">3110001D03Rik</a>      | 1.077 | 0.758 | 0.472444 | 0.724129 |
| 4706 | 10437443 | <a href="#">BC004063</a>           | <a href="#">66626</a>     | RIKEN cDNA 5730403B10 gene     | <a href="#">5730403B10Rik</a>      | 1.077 | 1.21  | 0.264441 | 0.539533 |
| 4707 | 10508492 | <a href="#">ENSMUST00000084263</a> | <a href="#">622480</a>    | similar to SPOC domain contain | <a href="#">LOC622480</a>          | 1.077 | 1.174 | 0.277575 | 0.552692 |
| 4708 | 10450908 | <a href="#">NM_146327</a>          | <a href="#">258324</a>    | olfactory receptor 129         | <a href="#">Olfr129</a>            | 1.077 | 0.992 | 0.353079 | 0.625939 |
| 4709 | 10454525 | <a href="#">NM_173441</a>          | <a href="#">73473</a>     | IWS1 homolog (S. cerevisiae)   | <a href="#">Iws1</a>               | 1.077 | 1.572 | 0.15868  | 0.405501 |
| 4710 | 10414973 | <a href="#">ENSMUST00000103671</a> | <a href="#">219060</a>    | RIKEN cDNA B230359F08 gene     | <a href="#">B230359F08Rik</a>      | 1.077 | 1.574 | 0.158119 | 0.405072 |
| 4711 | 10499904 | <a href="#">NM_008412</a>          | <a href="#">16447</a>     | involucrin                     | <a href="#">Ivl</a>                | 1.077 | 1.607 | 0.150845 | 0.394493 |
| 4712 | 10439058 | <a href="#">NM_146069</a>          | <a href="#">224109</a>    | leucine rich repeat containing | <a href="#">Lrrc33</a>             | 1.077 | 1.355 | 0.216316 | 0.483538 |
| 4713 | 10417095 | <a href="#">NM_134082</a>          | <a href="#">223254</a>    | FERM, RhoGEF (Arhgef) and plec | <a href="#">Farp1</a>              | 1.077 | 0.192 | 0.85328  | 0.940713 |
| 4714 | 10352703 | <a href="#">AK038499</a>           | <a href="#">100125339</a> | predicted gene, ENSMUSG0000006 | <a href="#">ENSMUSG00000066596</a> | 1.076 | 1.645 | 0.142786 | 0.382897 |
| 4715 | 10593799 | <a href="#">NM_001081341</a>       | <a href="#">244891</a>    | S phase cyclin A-associated pr | <a href="#">Scaper</a>             | 1.076 | 0.687 | 0.513695 | 0.754119 |
| 4716 | 10584541 | <a href="#">NM_030713</a>          | <a href="#">80902</a>     | zinc finger protein 202        | <a href="#">Zfp202</a>             | 1.076 | 1.185 | 0.273685 | 0.548356 |
| 4717 | 10555063 | <a href="#">NM_027256</a>          | <a href="#">101861</a>    | integrator complex subunit 4   | <a href="#">Ints4</a>              | 1.076 | 0.507 | 0.627016 | 0.830395 |
| 4718 | 10419604 | <a href="#">NM_207576</a>          | <a href="#">404341</a>    | olfactory receptor 1514        | <a href="#">Olfr1514</a>           | 1.076 | 1.409 | 0.200485 | 0.462476 |
| 4719 | 10562927 | <a href="#">NM_133949</a>          | <a href="#">84113</a>     | prostate tumor over expressed  | <a href="#">Ptov1</a>              | 1.076 | 0.889 | 0.402514 | 0.667563 |
| 4720 | 10484610 | <a href="#">AF178753</a>           | <a href="#">100037254</a> | predicted gene, OTTMUSG0000001 | <a href="#">OTTMUSG00000013632</a> | 1.076 | 1.003 | 0.348387 | 0.622153 |
| 4721 | 10431170 | <a href="#">NM_001033273</a>       | <a href="#">223739</a>    | RIKEN cDNA 5031439G07 gene     | <a href="#">5031439G07Rik</a>      | 1.076 | 0.756 | 0.473558 | 0.7251   |
| 4722 | 10567229 | <a href="#">NM_001031814</a>       | <a href="#">233789</a>    | RIKEN cDNA 2610207I05 gene     | <a href="#">2610207I05Rik</a>      | 1.076 | 1.536 | 0.167262 | 0.41822  |
| 4723 | 10565607 |                                    |                           |                                |                                    | 1.076 | 0.948 | 0.373808 | 0.643998 |
| 4724 | 10503145 |                                    |                           |                                |                                    | 1.076 | 1.287 | 0.237917 | 0.510297 |
| 4725 | 10506360 | <a href="#">NM_144906</a>          | <a href="#">73094</a>     | SH3-domain GRB2-like (endophil | <a href="#">Sgip1</a>              | 1.076 | 0.762 | 0.470414 | 0.722494 |
| 4726 | 10543944 | <a href="#">NM_008098</a>          | <a href="#">14489</a>     | myotrophin                     | <a href="#">Mtpn</a>               | 1.076 | 1.195 | 0.269832 | 0.544485 |
| 4727 | 10404538 | <a href="#">NM_013830</a>          | <a href="#">19134</a>     | PRP4 pre-mRNA processing facto | <a href="#">Prpf4b</a>             | 1.076 | 1.668 | 0.137911 | 0.375481 |
| 4728 | 10515481 | <a href="#">NM_023178</a>          | <a href="#">66233</a>     | DNA methyltransferase 1-associ | <a href="#">Dmap1</a>              | 1.076 | 0.785 | 0.457329 | 0.713005 |
| 4729 | 10589640 | <a href="#">NM_183103</a>          | <a href="#">74306</a>     | RIKEN cDNA 1700112C13 gene     | <a href="#">1700112C13Rik</a>      | 1.076 | 1.556 | 0.162457 | 0.411033 |
| 4730 | 10465011 | <a href="#">NM_016882</a>          | <a href="#">20227</a>     | squamous cell carcinoma antige | <a href="#">Sart1</a>              | 1.076 | 1.056 | 0.324904 | 0.601293 |
| 4731 | 10515051 | <a href="#">NM_173350</a>          | <a href="#">100273</a>    | oxysterol binding protein-like | <a href="#">Osbp19</a>             | 1.076 | 1.203 | 0.266981 | 0.541627 |
| 4732 | 10595680 | <a href="#">NM_194334</a>          | <a href="#">67016</a>     | TBC1 domain family, member 2B  | <a href="#">Tbc1d2b</a>            | 1.076 | 0.786 | 0.456696 | 0.712642 |
| 4733 | 10437852 | <a href="#">NM_001081154</a>       | <a href="#">223989</a>    | RIKEN cDNA 4921513D23 gene     | <a href="#">4921513D23Rik</a>      | 1.076 | 1.623 | 0.147422 | 0.389587 |
| 4734 | 10440491 | <a href="#">NM_007471</a>          | <a href="#">11820</a>     | amyloid beta (A4) precursor pr | <a href="#">App</a>                | 1.076 | 0.44  | 0.672804 | 0.854651 |





|      |          |                                     |                           |                                 |                                    |       |       |           |          |
|------|----------|-------------------------------------|---------------------------|---------------------------------|------------------------------------|-------|-------|-----------|----------|
| 4841 | 10592201 | <a href="#">NM_007691</a>           | <a href="#">12649</a>     | checkpoint kinase 1 homolog (S  | <a href="#">Chek1</a>              | 1.074 | 0.869 | 0.412719  | 0.676213 |
| 4842 | 10434559 | <a href="#">NM_010143</a>           | <a href="#">13845</a>     | Eph receptor B3                 | <a href="#">Ephb3</a>              | 1.074 | 0.844 | 0.42584   | 0.68764  |
| 4843 | 10371888 | <a href="#">NM_001080129</a>        | <a href="#">21917</a>     | thymopoietin                    | <a href="#">Tmpe</a>               | 1.073 | 1.38  | 0.208964  | 0.473969 |
| 4844 | 10478884 | <a href="#">NM_011427</a>           | <a href="#">20613</a>     | snail homolog 1 (Drosophila)    | <a href="#">Snai1</a>              | 1.073 | 1.032 | 0.33562   | 0.611175 |
| 4845 | 10353010 | <a href="#">NM_008651</a>           | <a href="#">17864</a>     | myeloblastosis oncogene-like 1  | <a href="#">Mybl1</a>              | 1.073 | 0.972 | 0.362291  | 0.633772 |
| 4846 | 10600249 | <a href="#">NM_019587</a>           | <a href="#">140571</a>    | plexin B3                       | <a href="#">PlxnB3</a>             | 1.073 | 1.329 | 0.224254  | 0.494263 |
| 4847 | 10510878 | <a href="#">ENSIMUST00000071251</a> | <a href="#">230971</a>    | multiple EGF-like-domains 6     | <a href="#">Megf6</a>              | 1.073 | 0.8   | 0.448993  | 0.706541 |
| 4848 | 10588243 | <a href="#">NM_013649</a>           | <a href="#">20187</a>     | receptor-like tyrosine kinase   | <a href="#">Ryk</a>                | 1.073 | 1.005 | 0.347432  | 0.62155  |
| 4849 | 10598505 | <a href="#">ENSIMUST00000068623</a> | <a href="#">70226</a>     | RIKEN cDNA 2900002K06 gene      | <a href="#">2900002K06Rik</a>      | 1.073 | 1.287 | 0.237734  | 0.510106 |
| 4850 | 10508376 | <a href="#">NM_178110</a>           | <a href="#">67525</a>     | tripartite motif-containing 62  | <a href="#">Trim62</a>             | 1.073 | 1.534 | 0.167693  | 0.418965 |
| 4851 | 10413216 | <a href="#">NM_175264</a>           | <a href="#">77592</a>     | RIKEN cDNA 4931406H21 gene      | <a href="#">4931406H21Rik</a>      | 1.073 | 1.185 | 0.273442  | 0.54818  |
| 4852 | 10539465 | <a href="#">NM_029245</a>           | <a href="#">75305</a>     | ankyrin repeat domain 53        | <a href="#">Ankrd53</a>            | 1.073 | 0.665 | 0.526887  | 0.762787 |
| 4853 | 10599781 | <a href="#">NM_028242</a>           | <a href="#">72459</a>     | HIV TAT specific factor 1       | <a href="#">Htatsf1</a>            | 1.073 | 0.587 | 0.575408  | 0.797076 |
| 4854 | 10380859 | <a href="#">BC057057</a>            | <a href="#">69131</a>     | Cdc2-related kinase, arginine/  | <a href="#">Crks</a>               | 1.073 | 0.168 | 0.871428  | 0.948625 |
| 4855 | 10356764 | <a href="#">BC089525</a>            | <a href="#">71874</a>     | RIKEN cDNA 2310007B03 gene      | <a href="#">2310007B03Rik</a>      | 1.073 | 1.732 | 0.125597  | 0.35484  |
| 4856 | 10426383 | <a href="#">NM_207243</a>           | <a href="#">239611</a>    | mucin 19                        | <a href="#">Muc19</a>              | 1.073 | 2.245 | 0.0585054 | 0.222329 |
| 4857 | 10546977 | <a href="#">NM_009723</a>           | <a href="#">11941</a>     | ATPase, Ca++ transporting, pla  | <a href="#">Atp2b2</a>             | 1.073 | 1.435 | 0.193273  | 0.452555 |
| 4858 | 10535017 | <a href="#">NM_001033416</a>        | <a href="#">330217</a>    | galactose-3-O-sulfotransferase  | <a href="#">Gal3st4</a>            | 1.073 | 0.716 | 0.496296  | 0.740946 |
| 4859 | 10455441 | <a href="#">NM_001013797</a>        | <a href="#">433180</a>    | serine peptidase inhibitor, Ka  | <a href="#">Spink6</a>             | 1.073 | 0.539 | 0.606041  | 0.81629  |
| 4860 | 10571696 | <a href="#">NM_009810</a>           | <a href="#">12367</a>     | caspase 3                       | <a href="#">Casp3</a>              | 1.073 | 0.931 | 0.38198   | 0.651575 |
| 4861 | 10506146 | <a href="#">ENSIMUST00000094956</a> | <a href="#">100038722</a> | predicted gene, ENSMUSG0000007  | <a href="#">ENSMUSG00000070892</a> | 1.073 | 1.289 | 0.237308  | 0.509565 |
| 4862 | 10426535 | <a href="#">BC038822</a>            | <a href="#">239647</a>    | cDNA sequence BC038822          | <a href="#">BC038822</a>           | 1.073 | 0.892 | 0.400964  | 0.666612 |
| 4863 | 10380761 | <a href="#">NM_138657</a>           | <a href="#">192157</a>    | suppressor of cytokine signali  | <a href="#">Soes7</a>              | 1.073 | 1.404 | 0.202022  | 0.464803 |
| 4864 | 10368490 | <a href="#">NM_001110197</a>        | <a href="#">68031</a>     | ring finger protein 146         | <a href="#">Rnf146</a>             | 1.073 | 1.159 | 0.283287  | 0.558595 |
| 4865 | 10564938 | <a href="#">NM_010194</a>           | <a href="#">14159</a>     | feline sarcoma oncogene         | <a href="#">Fes</a>                | 1.073 | 1.937 | 0.0927817 | 0.295048 |
| 4866 | 10524882 | <a href="#">NM_021539</a>           | <a href="#">59043</a>     | WD repeat and SOCS box- contain | <a href="#">Wsb2</a>               | 1.073 | 0.909 | 0.392863  | 0.660783 |
| 4867 | 10557165 | <a href="#">NM_027363</a>           | <a href="#">70261</a>     | RIKEN cDNA 2010110P09 gene      | <a href="#">2010110P09Rik</a>      | 1.073 | 1.759 | 0.120703  | 0.347135 |
| 4868 | 10348277 | <a href="#">NM_029846</a>           | <a href="#">77040</a>     | autophagy-related 16-like 1 (y  | <a href="#">Atg16L1</a>            | 1.073 | 0.741 | 0.482255  | 0.730954 |
| 4869 | 10488965 | <a href="#">ENSIMUST00000109611</a> | <a href="#">74562</a>     | fer-1-like 4 (C. elegans)       | <a href="#">Fer14</a>              | 1.073 | 1.296 | 0.23483   | 0.506141 |
| 4870 | 10471891 | <a href="#">NM_029687</a>           | <a href="#">76646</a>     | WD repeat domain 38             | <a href="#">Wdr38</a>              | 1.073 | 1.585 | 0.155678  | 0.401373 |
| 4871 | 10488642 | <a href="#">NM_145157</a>           | <a href="#">246700</a>    | defensin beta 19                | <a href="#">Defb19</a>             | 1.073 | 1.673 | 0.136977  | 0.373595 |
| 4872 | 10436788 | <a href="#">NM_015755</a>           | <a href="#">26559</a>     | hormonally upregulated Neu-ass  | <a href="#">Hunk</a>               | 1.073 | 0.259 | 0.803148  | 0.920071 |
| 4873 | 10539279 | <a href="#">NM_007517</a>           | <a href="#">11993</a>     | ancient ubiquitous protein      | <a href="#">Aup1</a>               | 1.073 | 1.566 | 0.160037  | 0.407342 |
| 4874 | 10425177 | <a href="#">NM_001039156</a>        | <a href="#">110253</a>    | TRIO and F-actin binding prote  | <a href="#">Triobp</a>             | 1.073 | 1.573 | 0.158516  | 0.40535  |
| 4875 | 10537318 | <a href="#">NM_145076</a>           | <a href="#">21848</a>     | tripartite motif-containing 24  | <a href="#">Trim24</a>             | 1.073 | 1.251 | 0.250103  | 0.524217 |
| 4876 | 10358991 | <a href="#">ENSIMUST00000035914</a> | <a href="#">207792</a>    | cDNA sequence BC034090          | <a href="#">BC034090</a>           | 1.073 | 1.486 | 0.179657  | 0.434993 |
| 4877 | 10593130 | <a href="#">NM_172257</a>           | <a href="#">214597</a>    | SID1 transmembrane family, mem  | <a href="#">Sidr2</a>              | 1.073 | 0.893 | 0.400905  | 0.666612 |
| 4878 | 10415472 | <a href="#">NM_001033043</a>        | <a href="#">30054</a>     | ring finger protein 17          | <a href="#">Rnf17</a>              | 1.073 | 1.239 | 0.254197  | 0.528502 |
| 4879 | 10421515 | <a href="#">XR_034294</a>           | <a href="#">668487</a>    | similar to Rnf26 protein        | <a href="#">LOC668487</a>          | 1.073 | 0.861 | 0.416859  | 0.679627 |
| 4880 | 10362432 |                                     |                           |                                 |                                    | 1.073 | 0.849 | 0.422976  | 0.685287 |
| 4881 | 10433658 |                                     |                           |                                 |                                    | 1.073 | 0.992 | 0.353082  | 0.625939 |
| 4882 | 10521709 | <a href="#">NM_024434</a>           | <a href="#">66988</a>     | leucine aminopeptidase 3        | <a href="#">Lap3</a>               | 1.073 | 0.499 | 0.632529  | 0.832839 |
| 4883 | 10517419 | <a href="#">BC089372</a>            | <a href="#">230824</a>    | grainyhead-like 3 (Drosophila)  | <a href="#">Grhl3</a>              | 1.072 | 0.91  | 0.392257  | 0.660367 |
| 4884 | 10430929 | <a href="#">BC095996</a>            | <a href="#">21378</a>     | transforming growth factor bet  | <a href="#">Tbrg3</a>              | 1.072 | 0.654 | 0.533283  | 0.767318 |
| 4885 | 10532720 | <a href="#">NM_016926</a>           | <a href="#">53890</a>     | squamous cell carcinoma antigen | <a href="#">Sart3</a>              | 1.072 | 0.753 | 0.475207  | 0.726714 |
| 4886 | 10415888 | <a href="#">ENSIMUST00000100481</a> | <a href="#">100038729</a> | predicted gene, ENSMUSG0000007  | <a href="#">ENSMUSG00000075568</a> | 1.072 | 1.081 | 0.314403  | 0.591225 |
| 4887 | 10521832 | <a href="#">NM_028744</a>           | <a href="#">67073</a>     | phosphatidylinositol 4-kinase   | <a href="#">Pi4k2b</a>             | 1.072 | 0.815 | 0.441235  | 0.700253 |
| 4888 | 10422436 | <a href="#">NM_001081039</a>        | <a href="#">105445</a>    | dedicator of cytokinesis 9      | <a href="#">Dock9</a>              | 1.072 | 0.633 | 0.546181  | 0.777655 |
| 4889 | 10572525 | <a href="#">ENSIMUST00000098653</a> | <a href="#">665828</a>    | predicted gene, EG665828        | <a href="#">EG665828</a>           | 1.072 | 1.362 | 0.214352  | 0.480978 |
| 4890 | 10477147 | <a href="#">NM_010376</a>           | <a href="#">14950</a>     | histocompatibility 13           | <a href="#">H13</a>                | 1.072 | 1.035 | 0.333967  | 0.609581 |
| 4891 | 10489266 | <a href="#">NM_173368</a>           | <a href="#">71389</a>     | chromodomain helicase DNA       | <a href="#">Chd6</a>               | 1.072 | 0.579 | 0.579918  | 0.799181 |

|      |          |                                    |                           | bind                             |                                    |       |       |           |          |
|------|----------|------------------------------------|---------------------------|----------------------------------|------------------------------------|-------|-------|-----------|----------|
| 4892 | 10521848 | <a href="#">NM_030185</a>          | <a href="#">78796</a>     | zinc finger, CCHC domain conta   | <a href="#">Zcchc4</a>             | 1.072 | 0.929 | 0.382776  | 0.652221 |
| 4893 | 10459827 | <a href="#">ENSMUST00000026494</a> | <a href="#">225743</a>    | ring finger protein 165          | <a href="#">Rnf165</a>             | 1.072 | 1.289 | 0.237234  | 0.509506 |
| 4894 | 10529344 | <a href="#">NM_181857</a>          | <a href="#">272158</a>    | DNA polymerase N                 | <a href="#">Poln</a>               | 1.072 | 1.559 | 0.161653  | 0.409879 |
| 4895 | 10459109 | <a href="#">NM_011552</a>          | <a href="#">21453</a>     | Treacher Collins Franceschetti   | <a href="#">Tcof1</a>              | 1.072 | 0.569 | 0.586846  | 0.803852 |
| 4896 | 10579532 | <a href="#">NM_198095</a>          | <a href="#">69550</a>     | bone marrow stromal cell antig   | <a href="#">Bst2</a>               | 1.072 | 0.361 | 0.728674  | 0.882456 |
| 4897 | 10568065 | <a href="#">NM_153580</a>          | <a href="#">233875</a>    | coiled-coil domain containing    | <a href="#">Ccdc95</a>             | 1.072 | 0.32  | 0.758343  | 0.898716 |
| 4898 | 10535027 | <a href="#">NM_029693</a>          | <a href="#">76658</a>     | RIKEN cDNA 1700123K08 gene       | <a href="#">1700123K08Rik</a>      | 1.072 | 1.066 | 0.320607  | 0.597527 |
| 4899 | 10347497 | <a href="#">NM_009518</a>          | <a href="#">22409</a>     | wingless related MMTV integrat   | <a href="#">Wnt10a</a>             | 1.072 | 1.821 | 0.110238  | 0.328467 |
| 4900 | 10493711 | <a href="#">NM_028881</a>          | <a href="#">74343</a>     | CREB regulated transcription c   | <a href="#">Crtc2</a>              | 1.072 | 1.215 | 0.262505  | 0.536954 |
| 4901 | 10588219 |                                    |                           |                                  |                                    | 1.072 | 0.822 | 0.437562  | 0.696831 |
| 4902 | 10477187 | <a href="#">NM_028109</a>          | <a href="#">72119</a>     | TPX2, microtubule-associated p   | <a href="#">Tpx2</a>               | 1.072 | 0.831 | 0.432497  | 0.692938 |
| 4903 | 10440881 | <a href="#">BC027145</a>           | <a href="#">67367</a>     | RIKEN cDNA 1810007M14 gene       | <a href="#">1810007M14Rik</a>      | 1.072 | 1.176 | 0.276943  | 0.552111 |
| 4904 | 10581450 | <a href="#">NM_028038</a>          | <a href="#">71986</a>     | DEAD (Asp-Glu-Ala-Asp) box pol   | <a href="#">Ddx28</a>              | 1.072 | 0.078 | 0.939596  | 0.976496 |
| 4905 | 10473981 | <a href="#">NM_172669</a>          | <a href="#">228361</a>    | autophagy/beclin 1 regulator 1   | <a href="#">Ambra1</a>             | 1.072 | 0.943 | 0.375984  | 0.646063 |
| 4906 | 10403361 | <a href="#">NM_145131</a>          | <a href="#">69617</a>     | pitrylysin metalleptidase 1      | <a href="#">Pitrm1</a>             | 1.072 | 0.457 | 0.661108  | 0.849033 |
| 4907 | 10384737 | <a href="#">NM_172555</a>          | <a href="#">216578</a>    | poly(A) polymerase gamma         | <a href="#">Papolg</a>             | 1.072 | 0.713 | 0.498467  | 0.742429 |
| 4908 | 10402066 | <a href="#">NM_183186</a>          | <a href="#">71375</a>     | forkhead box N3                  | <a href="#">Foxn3</a>              | 1.072 | 0.486 | 0.641323  | 0.837465 |
| 4909 | 10480699 | <a href="#">NM_031843</a>          | <a href="#">83768</a>     | dipeptidylpeptidase 7            | <a href="#">Dpp7</a>               | 1.072 | 1.149 | 0.287169  | 0.562971 |
| 4910 | 10454298 | <a href="#">NM_027007</a>          | <a href="#">69256</a>     | zinc finger protein 397          | <a href="#">Zfp397</a>             | 1.072 | 0.973 | 0.362134  | 0.633645 |
| 4911 | 10495933 | <a href="#">ENSMUST00000106383</a> | <a href="#">71643</a>     | RIKEN cDNA 4930422G04 gene       | <a href="#">4930422G04Rik</a>      | 1.072 | 1.509 | 0.173742  | 0.426449 |
| 4912 | 10491399 | <a href="#">NM_029017</a>          | <a href="#">74600</a>     | mitochondrial ribosomal protei   | <a href="#">Mrpl47</a>             | 1.072 | 0.372 | 0.720467  | 0.878318 |
| 4913 | 10444747 |                                    |                           |                                  |                                    | 1.072 | 1.024 | 0.339071  | 0.614614 |
| 4914 | 10607395 | <a href="#">NM_023788</a>          | <a href="#">75625</a>     | melanoma antigen, family H, 1    | <a href="#">Mageh1</a>             | 1.072 | 1.192 | 0.270902  | 0.545416 |
| 4915 | 10377622 | <a href="#">NM_001013414</a>       | <a href="#">216860</a>    | RIKEN cDNA 0610025P10 gene       | <a href="#">0610025P10Rik</a>      | 1.072 | 1.338 | 0.221391  | 0.490784 |
| 4916 | 10401068 | <a href="#">NM_013675</a>          | <a href="#">20741</a>     | spectrin beta 1                  | <a href="#">Sponb1</a>             | 1.072 | 1.511 | 0.17318   | 0.425638 |
| 4917 | 10525406 | <a href="#">NM_019805</a>          | <a href="#">56317</a>     | anaphase promoting complex sub   | <a href="#">Anape7</a>             | 1.072 | 0.335 | 0.747406  | 0.892632 |
| 4918 | 10358879 | <a href="#">NM_028749</a>          | <a href="#">74091</a>     | N-acetylneuraminatate pyruvate 1 | <a href="#">Npl</a>                | 1.072 | 0.593 | 0.571526  | 0.795651 |
| 4919 | 10535841 | <a href="#">NM_027872</a>          | <a href="#">71706</a>     | solute carrier family 46, memb   | <a href="#">Slc46a3</a>            | 1.072 | 1.244 | 0.252399  | 0.526583 |
| 4920 | 10483561 | <a href="#">AK041069</a>           | <a href="#">100038655</a> | predicted gene, ENSMUSG0000007   | <a href="#">ENSMUSG00000075299</a> | 1.072 | 0.769 | 0.466211  | 0.719571 |
| 4921 | 10450605 | <a href="#">NM_011655</a>          | <a href="#">22154</a>     | tubulin, beta 5                  | <a href="#">Tubb5</a>              | 1.072 | 0.807 | 0.445423  | 0.703573 |
| 4922 | 10542650 | <a href="#">NM_025872</a>          | <a href="#">66964</a>     | golgi transport 1 homolog B (S   | <a href="#">Golt1b</a>             | 1.072 | 0.902 | 0.39634   | 0.663741 |
| 4923 | 10580872 | <a href="#">NM_024467</a>          | <a href="#">79233</a>     | zinc finger protein 319          | <a href="#">Zfp319</a>             | 1.072 | 0.114 | 0.912516  | 0.965146 |
| 4924 | 10466676 | <a href="#">BC023385</a>           | <a href="#">66206</a>     | RIKEN cDNA 1110059E24 gene       | <a href="#">1110059E24Rik</a>      | 1.072 | 1.084 | 0.313118  | 0.589668 |
| 4925 | 10561047 | <a href="#">NM_153576</a>          | <a href="#">232983</a>    | chemokine (C-X-C motif) ligand   | <a href="#">Cxcl17</a>             | 1.072 | 1.893 | 0.0990262 | 0.307265 |
| 4926 | 10465106 | <a href="#">NM_019935</a>          | <a href="#">18426</a>     | OVO homolog-like 1 (Drosophila)  | <a href="#">Ovol1</a>              | 1.071 | 1.019 | 0.341089  | 0.615941 |
| 4927 | 10413991 | <a href="#">XM_985917</a>          | <a href="#">268729</a>    | gene model 626, (NCBI)           | <a href="#">Gm626</a>              | 1.071 | 1.532 | 0.168203  | 0.419669 |
| 4928 | 10560530 | <a href="#">NM_177692</a>          | <a href="#">232946</a>    | biogenesis of lysosome-related   | <a href="#">Bloc1s3</a>            | 1.071 | 0.625 | 0.55093   | 0.781103 |
| 4929 | 10521415 | <a href="#">NM_177678</a>          | <a href="#">231148</a>    | actin-binding LIM protein 2      | <a href="#">Ablim2</a>             | 1.071 | 1.304 | 0.232166  | 0.502859 |
| 4930 | 10440643 | <a href="#">NM_181490</a>          | <a href="#">239931</a>    | claudin 17                       | <a href="#">Cldn17</a>             | 1.071 | 0.762 | 0.47041   | 0.722494 |
| 4931 | 10576774 | <a href="#">NM_029465</a>          | <a href="#">75863</a>     | C-type lectin domain family 4,   | <a href="#">Clec4g</a>             | 1.071 | 2.061 | 0.0770855 | 0.263396 |
| 4932 | 10606060 | <a href="#">XM_136015</a>          | <a href="#">212753</a>    | predicted gene, EG212753         | <a href="#">EG212753</a>           | 1.071 | 1.448 | 0.189563  | 0.448035 |
| 4933 | 10453216 | <a href="#">BC065413</a>           | <a href="#">72167</a>     | THUMP domain containing 2        | <a href="#">Thumpd2</a>            | 1.071 | 0.93  | 0.382431  | 0.651896 |
| 4934 | 10554397 | <a href="#">NM_177765</a>          | <a href="#">269954</a>    | tubulin tyrosine ligase-like f   | <a href="#">Ttl13</a>              | 1.071 | 0.871 | 0.411697  | 0.675585 |
| 4935 | 10546791 | <a href="#">NM_145937</a>          | <a href="#">58911</a>     | sulfatase modifying factor 1     | <a href="#">Sumf1</a>              | 1.071 | 0.662 | 0.52845   | 0.763794 |
| 4936 | 10362104 | <a href="#">NM_178934</a>          | <a href="#">353169</a>    | solute carrier family 2 (facil   | <a href="#">Slc2a12</a>            | 1.071 | 1.181 | 0.275239  | 0.550143 |
| 4937 | 10518847 | <a href="#">NM_172705</a>          | <a href="#">230936</a>    | PHD finger protein 13            | <a href="#">Phf13</a>              | 1.071 | 1.357 | 0.215754  | 0.482894 |
| 4938 | 10397267 | <a href="#">BC022589</a>           | <a href="#">74316</a>     | iron-sulfur cluster assembly 2   | <a href="#">Isca2</a>              | 1.071 | 1.387 | 0.206916  | 0.471397 |
| 4939 | 10455852 | <a href="#">NM_028447</a>          | <a href="#">73137</a>     | proline-rich coiled-coil 1       | <a href="#">Prrc1</a>              | 1.071 | 1.267 | 0.244549  | 0.517644 |
| 4940 | 10413853 | <a href="#">NM_011960</a>          | <a href="#">26430</a>     | poly (ADP-ribose) glycohydrola   | <a href="#">Parg</a>               | 1.071 | 1.295 | 0.235116  | 0.506551 |
| 4941 | 10487622 | <a href="#">NM_009225</a>          | <a href="#">20638</a>     | small nuclear ribonucleoprotei   | <a href="#">Snrbp</a>              | 1.071 | 0.658 | 0.531005  | 0.765411 |
| 4942 | 10582458 | <a href="#">NM_001081379</a>       | <a href="#">77087</a>     | ankyrin repeat domain 11         | <a href="#">Ankrd11</a>            | 1.071 | 0.974 | 0.361383  | 0.633168 |

|      |          |                                    |                           |                                                         |                                     |       |       |          |          |
|------|----------|------------------------------------|---------------------------|---------------------------------------------------------|-------------------------------------|-------|-------|----------|----------|
| 4943 | 10526508 | <a href="#">NM_025562</a>          | <a href="#">66437</a>     | fission 1 (mitochondrial outer                          | <a href="#">Fisl</a>                | 1.071 | 0.585 | 0.576333 | 0.797356 |
| 4944 | 10461078 | <a href="#">BC017138</a>           | <a href="#">109168</a>    | RIKEN cDNA 5730596K20 gene                              | <a href="#">5730596K20Rik</a>       | 1.071 | 0.406 | 0.696245 | 0.866577 |
| 4945 | 10502199 |                                    |                           |                                                         |                                     | 1.071 | 0.397 | 0.703015 | 0.869729 |
| 4946 | 10599232 | <a href="#">NM_025937</a>          | <a href="#">67050</a>     | NFKB activating protein                                 | <a href="#">Nkap</a>                | 1.071 | 0.774 | 0.463765 | 0.717865 |
| 4947 | 10405427 | <a href="#">NM_025596</a>          | <a href="#">66494</a>     | PRELI domain containing 1                               | <a href="#">Preid1</a>              | 1.071 | 0.638 | 0.54334  | 0.775718 |
| 4948 | 10576973 | <a href="#">NM_009931</a>          | <a href="#">12826</a>     | collagen, type IV, alpha 1                              | <a href="#">Col4a1</a>              | 1.071 | 1.601 | 0.152134 | 0.395855 |
| 4949 | 10573675 | <a href="#">NM_025827</a>          | <a href="#">66887</a>     | lon peptidase 2, peroxisomal                            | <a href="#">Lonp2</a>               | 1.071 | 0.968 | 0.364515 | 0.635653 |
| 4950 | 10601978 | <a href="#">ENSMUST00000113046</a> | <a href="#">71248</a>     | RIKEN cDNA 4933428M09 gene                              | <a href="#">4933428M09Rik</a>       | 1.071 | 1.506 | 0.174505 | 0.427497 |
| 4951 | 10505927 |                                    |                           |                                                         |                                     | 1.071 | 0.176 | 0.865204 | 0.946153 |
| 4952 | 10397895 | <a href="#">NM_022323</a>          | <a href="#">64113</a>     | modulator of apoptosis 1                                | <a href="#">Moap1</a>               | 1.071 | 0.844 | 0.425696 | 0.687513 |
| 4953 | 10431528 | <a href="#">NM_178919</a>          | <a href="#">105847</a>    | lipase maturation factor 2                              | <a href="#">Lmf2</a>                | 1.071 | 1.242 | 0.252989 | 0.52727  |
| 4954 | 10397835 | <a href="#">NM_172152</a>          | <a href="#">238384</a>    | solute carrier family 24 (sodi                          | <a href="#">Slc24a4</a>             | 1.071 | 1.206 | 0.266024 | 0.54117  |
| 4955 | 10348096 | <a href="#">NM_153530</a>          | <a href="#">208718</a>    | DIS3 mitotic control homolog (                          | <a href="#">Dis3l2</a>              | 1.07  | 1.28  | 0.240236 | 0.513302 |
| 4956 | 10430945 | <a href="#">NM_178627</a>          | <a href="#">73826</a>     | polymerase (DNA-directed), del                          | <a href="#">Poldip3</a>             | 1.07  | 0.738 | 0.483659 | 0.732303 |
| 4957 | 10504817 | <a href="#">NM_009370</a>          | <a href="#">21812</a>     | transforming growth factor, be                          | <a href="#">Tgfb1</a>               | 1.07  | 1.008 | 0.346091 | 0.620193 |
| 4958 | 10463112 | <a href="#">NM_172839</a>          | <a href="#">240665</a>    | cyclin J                                                | <a href="#">Ccnj</a>                | 1.07  | 0.59  | 0.572929 | 0.796481 |
| 4959 | 10604576 | <a href="#">NM_016697</a>          | <a href="#">14734</a>     | glypican 3                                              | <a href="#">Gpc3</a>                | 1.07  | 1     | 0.349783 | 0.62328  |
| 4960 | 10517677 | <a href="#">NM_008675</a>          | <a href="#">17965</a>     | neuroblastoma, suppression of                           | <a href="#">Nbl1</a>                | 1.07  | 0.821 | 0.437691 | 0.696922 |
| 4961 | 10406361 |                                    |                           |                                                         |                                     | 1.07  | 0.857 | 0.419056 | 0.681474 |
| 4962 | 10499716 | <a href="#">NM_028475</a>          | <a href="#">74383</a>     | ubiquitin associated protein 2                          | <a href="#">Ubap2l</a>              | 1.07  | 0.775 | 0.463181 | 0.717525 |
| 4963 | 10397717 | <a href="#">ENSMUST00000101134</a> | <a href="#">100046427</a> | hypothetical protein LOC100046                          | <a href="#">LOC100046427</a>        | 1.07  | 0.392 | 0.706321 | 0.871814 |
| 4964 | 10562399 | <a href="#">NM_146188</a>          | <a href="#">233107</a>    | potassium channel tetramerisat                          | <a href="#">Kctd15</a>              | 1.07  | 0.626 | 0.550731 | 0.780996 |
| 4965 | 10448563 | <a href="#">NM_007893</a>          | <a href="#">13560</a>     | E4F transcription factor 1                              | <a href="#">E4f1</a>                | 1.07  | 1.799 | 0.113798 | 0.334466 |
| 4966 | 10587818 | <a href="#">NM_178711</a>          | <a href="#">235527</a>    | phospholipid scramblase 4                               | <a href="#">Plscr4</a>              | 1.07  | 0.887 | 0.403461 | 0.668494 |
| 4967 | 10421768 | <a href="#">ENSMUST00000022593</a> | <a href="#">219181</a>    | A kinase (PRKA) anchor protein                          | <a href="#">Akap11</a>              | 1.07  | 0.633 | 0.545982 | 0.777637 |
| 4968 | 10598403 | <a href="#">NM_138602</a>          | <a href="#">54637</a>     | PRA1 domain family 2                                    | <a href="#">Praf2</a>               | 1.07  | 0.593 | 0.571952 | 0.795252 |
| 4969 | 10377516 | <a href="#">NM_010599</a>          | <a href="#">16499</a>     | potassium voltage-gated channe                          | <a href="#">Kcnab3</a>              | 1.07  | 1.116 | 0.300325 | 0.576447 |
| 4970 | 10369176 | <a href="#">NM_001033385</a>       | <a href="#">544696</a>    | RIKEN cDNA D630037F22 gene                              | <a href="#">D630037F22Rik</a>       | 1.07  | 0.645 | 0.539039 | 0.772027 |
| 4971 | 10361104 | <a href="#">NM_144880</a>          | <a href="#">226849</a>    | protein phosphatase 2, regulat                          | <a href="#">Ppp2r5a</a>             | 1.07  | 0.632 | 0.546852 | 0.778024 |
| 4972 | 10388132 | <a href="#">BC043106</a>           | <a href="#">74477</a>     | RIKEN cDNA 4933427D14 gene                              | <a href="#">4933427D14Rik</a>       | 1.07  | 1.17  | 0.279315 | 0.554538 |
| 4973 | 10595000 | <a href="#">NM_016963</a>          | <a href="#">50875</a>     | tropomodulin 3                                          | <a href="#">Tmod3</a>               | 1.07  | 0.642 | 0.540819 | 0.773267 |
| 4974 | 10573190 | <a href="#">NM_146270</a>          | <a href="#">258267</a>    | olfactory receptor 370                                  | <a href="#">Olfr370</a>             | 1.07  | 1.303 | 0.232712 | 0.503682 |
| 4975 | 10347862 | <a href="#">BC059229</a>           | <a href="#">75734</a>     | RIKEN cDNA 5230400G24 gene                              | <a href="#">5230400G24Rik</a>       | 1.07  | 0.846 | 0.424912 | 0.686823 |
| 4976 | 10460057 | <a href="#">NM_001081300</a>       | <a href="#">110796</a>    | teashirt zinc finger family me                          | <a href="#">Tshz1</a>               | 1.07  | 0.261 | 0.801157 | 0.919484 |
| 4977 | 10346762 |                                    |                           |                                                         |                                     | 1.07  | 1.037 | 0.333293 | 0.609193 |
| 4978 | 10562260 | <a href="#">NM_027898</a>          | <a href="#">52857</a>     | GRAM domain containing 1A                               | <a href="#">Gramd1a</a>             | 1.07  | 1.508 | 0.174045 | 0.427013 |
| 4979 | 10481304 | <a href="#">NM_008114</a>          | <a href="#">14582</a>     | growth factor independent 1B                            | <a href="#">Gfi1b</a>               | 1.07  | 1.655 | 0.140732 | 0.379507 |
| 4980 | 10466274 | <a href="#">ENSMUST00000087857</a> | <a href="#">257938</a>    | olfactory receptor 1419                                 | <a href="#">Olfr1419</a>            | 1.07  | 1.205 | 0.266338 | 0.541183 |
| 4981 | 10583676 | <a href="#">NM_021531</a>          | <a href="#">59035</a>     | coactivator-associated arginin                          | <a href="#">Carm1</a>               | 1.07  | 1.123 | 0.297553 | 0.573709 |
| 4982 | 10503401 | <a href="#">NM_028264</a>          | <a href="#">72519</a>     | transmembrane protein 55A                               | <a href="#">Tmem55a</a>             | 1.07  | 1.344 | 0.219715 | 0.488604 |
| 4983 | 10459138 | <a href="#">NM_201353</a>          | <a href="#">240332</a>    | solute carrier family 6 (neuro                          | <a href="#">Slc6a7</a>              | 1.07  | 1.068 | 0.319785 | 0.596635 |
| 4984 | 10511789 | <a href="#">NM_172987</a>          | <a href="#">269513</a>    | Na <sup>+</sup> /K <sup>+</sup> transporting ATPase int | <a href="#">Nkain3</a>              | 1.07  | 1.06  | 0.32335  | 0.599886 |
| 4985 | 10515930 | <a href="#">BC076608</a>           | <a href="#">433752</a>    | expressed sequence AA415398                             | <a href="#">AA415398</a>            | 1.07  | 1.615 | 0.149184 | 0.391598 |
| 4986 | 10532956 | <a href="#">NM_013879</a>          | <a href="#">29867</a>     | calcium binding protein 1                               | <a href="#">Cabp1</a>               | 1.07  | 0.699 | 0.506221 | 0.74808  |
| 4987 | 10359375 | <a href="#">XM_885170</a>          | <a href="#">620246</a>    | G protein-coupled receptor 52                           | <a href="#">Gpr52</a>               | 1.07  | 0.982 | 0.358008 | 0.630288 |
| 4988 | 10461191 | <a href="#">NM_016813</a>          | <a href="#">53319</a>     | nuclear RNA export factor 1 ho                          | <a href="#">Nxf1</a>                | 1.07  | 1.135 | 0.292624 | 0.568731 |
| 4989 | 10502076 |                                    |                           |                                                         |                                     | 1.07  | 0.56  | 0.592316 | 0.807145 |
| 4990 | 10571321 | <a href="#">NM_177741</a>          | <a href="#">244416</a>    | protein phosphatase 1, regulat                          | <a href="#">Ppp1r3b</a>             | 1.07  | 1.754 | 0.121702 | 0.348347 |
| 4991 | 10583759 | <a href="#">BC120702</a>           | <a href="#">67119</a>     | RIKEN cDNA 2510048L02 gene                              | <a href="#">2510048L02Rik</a>       | 1.07  | 0.817 | 0.439888 | 0.699113 |
| 4992 | 10478692 | <a href="#">NM_130451</a>          | <a href="#">170441</a>    | solute carrier family 2 (facil                          | <a href="#">Slc2a10</a>             | 1.069 | 1.283 | 0.239032 | 0.511774 |
| 4993 | 10596769 | <a href="#">NM_148930</a>          | <a href="#">83486</a>     | RNA binding motif protein 5                             | <a href="#">Rbm5</a>                | 1.069 | 1.401 | 0.202673 | 0.465349 |
| 4994 | 10438690 | <a href="#">NM_145480</a>          | <a href="#">106344</a>    | replication factor C (activato                          | <a href="#">Rfc4</a>                | 1.069 | 0.771 | 0.465358 | 0.719001 |
| 4995 | 10388716 | <a href="#">ENSMUST00000092883</a> | <a href="#">791303</a>    | predicted gene,                                         | <a href="#">ENSMUSTG00000069804</a> | 1.069 | 1.119 | 0.299137 | 0.575152 |

|      |          |                                    |                           |                                |                                    |       |       |          |          |
|------|----------|------------------------------------|---------------------------|--------------------------------|------------------------------------|-------|-------|----------|----------|
| 4996 | 10381474 | <a href="#">NM_025404</a>          | <a href="#">80981</a>     | ENSMUSG0000006                 | <a href="#">Arl4d</a>              | 1.069 | 1.065 | 0.321078 | 0.598048 |
| 4997 | 10491945 | <a href="#">NM_016858</a>          | <a href="#">19338</a>     | RAB33B, member of RAS oncogene | <a href="#">Rab33b</a>             | 1.069 | 0.785 | 0.457361 | 0.713005 |
| 4998 | 10535213 | <a href="#">NM_172277</a>          | <a href="#">231834</a>    | sorting nexin 8                | <a href="#">Snx8</a>               | 1.069 | 0.722 | 0.492791 | 0.738715 |
| 4999 | 10541246 | <a href="#">NM_008359</a>          | <a href="#">16172</a>     | interleukin 17 receptor A      | <a href="#">Il17ra</a>             | 1.069 | 1.18  | 0.275591 | 0.550454 |
| 5000 | 10464825 | <a href="#">NM_016892</a>          | <a href="#">12460</a>     | copper chaperone for superoxid | <a href="#">Ccs</a>                | 1.069 | 0.732 | 0.487291 | 0.734951 |
| 5001 | 10524325 | <a href="#">ENSMUST00000100889</a> | <a href="#">100038366</a> | predicted gene, ENSMUSG0000007 | <a href="#">ENSMUSG00000072730</a> | 1.069 | 1.337 | 0.221973 | 0.49161  |
| 5002 | 10346533 | <a href="#">NM_022988</a>          | <a href="#">65102</a>     | Ngg1 interacting factor 3-like | <a href="#">Nif3l1</a>             | 1.069 | 0.776 | 0.462404 | 0.716899 |
| 5003 | 10517664 |                                    |                           |                                |                                    | 1.069 | 1.016 | 0.342416 | 0.616776 |
| 5004 | 10601192 | <a href="#">NM_001081008</a>       | <a href="#">270627</a>    | TAF1 RNA polymerase II, TATA b | <a href="#">Taf1</a>               | 1.069 | 0.87  | 0.412497 | 0.676163 |
| 5005 | 10538975 | <a href="#">ENSMUST00000101310</a> | <a href="#">381785</a>    | gene model 1070, (NCBI)        | <a href="#">Gm1070</a>             | 1.069 | 1.523 | 0.170255 | 0.421869 |
| 5006 | 10461709 | <a href="#">XR_033950</a>          | <a href="#">667078</a>    | predicted gene, EG667078       | <a href="#">EG667078</a>           | 1.069 | 0.343 | 0.741685 | 0.88982  |
| 5007 | 10500957 | <a href="#">ENSMUST00000098762</a> | <a href="#">78635</a>     | RIKEN cDNA 1700095B22 gene     | <a href="#">1700095B22Rik</a>      | 1.069 | 1.077 | 0.316255 | 0.593179 |
| 5008 | 10443561 | <a href="#">BC024691</a>           | <a href="#">74157</a>     | RIKEN cDNA 1300018I05 gene     | <a href="#">1300018I05Rik</a>      | 1.069 | 0.701 | 0.505428 | 0.747535 |
| 5009 | 10599562 | <a href="#">AB073967</a>           | <a href="#">75404</a>     | RIKEN cDNA 1100001E04 gene     | <a href="#">1100001E04Rik</a>      | 1.069 | 1.095 | 0.308832 | 0.585384 |
| 5010 | 10404895 | <a href="#">ENSMUST00000038032</a> | <a href="#">76000</a>     | RIKEN cDNA 5033430I15 gene     | <a href="#">5033430I15Rik</a>      | 1.069 | 0.267 | 0.796806 | 0.917479 |
| 5011 | 10567591 |                                    |                           |                                |                                    | 1.069 | 1.321 | 0.226891 | 0.497571 |
| 5012 | 10466288 | <a href="#">NM_146678</a>          | <a href="#">258673</a>    | olfactory receptor 1428        | <a href="#">Olfr1428</a>           | 1.069 | 1.531 | 0.168273 | 0.419719 |
| 5013 | 10354085 | <a href="#">NM_019570</a>          | <a href="#">56210</a>     | REV1 homolog (S. cerevisiae)   | <a href="#">Rev1</a>               | 1.069 | 1.112 | 0.301843 | 0.577905 |
| 5014 | 10377689 | <a href="#">NM_019749</a>          | <a href="#">56486</a>     | gamma-aminobutyric acid recept | <a href="#">Gabarap</a>            | 1.069 | 0.956 | 0.370086 | 0.640667 |
| 5015 | 10492757 | <a href="#">NM_016784</a>          | <a href="#">53317</a>     | pleiotropic regulator 1, PRL1  | <a href="#">Plrg1</a>              | 1.069 | 0.561 | 0.591599 | 0.806879 |
| 5016 | 10549633 | <a href="#">AK006430</a>           | <a href="#">58804</a>     | CDC42 effector protein (Rho GT | <a href="#">Cdc42ep5</a>           | 1.069 | 0.876 | 0.409405 | 0.673759 |
| 5017 | 10354555 | <a href="#">NM_133728</a>          | <a href="#">70396</a>     | asparagine synthetase domain c | <a href="#">Asnsd1</a>             | 1.069 | 0.822 | 0.437286 | 0.696704 |
| 5018 | 10477583 | <a href="#">NM_023130</a>          | <a href="#">19383</a>     | hnRNP-associated with lethal y | <a href="#">Raly</a>               | 1.069 | 0.868 | 0.413237 | 0.676799 |
| 5019 | 10384145 | <a href="#">BC028539</a>           | <a href="#">77605</a>     | H2A histone family, member V   | <a href="#">H2afv</a>              | 1.069 | 1.378 | 0.2093   | 0.474426 |
| 5020 | 10391811 | <a href="#">BC057614</a>           | <a href="#">70218</a>     | RIKEN cDNA 3000004C01 gene     | <a href="#">3000004C01Rik</a>      | 1.069 | 1.471 | 0.183496 | 0.440641 |
| 5021 | 10542270 |                                    |                           |                                |                                    | 1.068 | 1.313 | 0.229299 | 0.500317 |
| 5022 | 10381311 | <a href="#">NM_175638</a>          | <a href="#">69847</a>     | WNK lysine deficient protein k | <a href="#">Wnk4</a>               | 1.068 | 1.192 | 0.270842 | 0.545372 |
| 5023 | 10425808 | <a href="#">NM_009775</a>          | <a href="#">12257</a>     | translocator protein           | <a href="#">Tspo</a>               | 1.068 | 0.946 | 0.374607 | 0.644557 |
| 5024 | 10566630 | <a href="#">ENSMUST00000060348</a> | <a href="#">76679</a>     | RIKEN cDNA 5330417H12 gene     | <a href="#">5330417H12Rik</a>      | 1.068 | 1.08  | 0.31497  | 0.591924 |
| 5025 | 10542378 | <a href="#">NM_019426</a>          | <a href="#">54343</a>     | activating transcription facto | <a href="#">Atf7ip</a>             | 1.068 | 0.692 | 0.510782 | 0.751982 |
| 5026 | 10584977 | <a href="#">NM_027498</a>          | <a href="#">70661</a>     | cDNA sequence BC033915         | <a href="#">BC033915</a>           | 1.068 | 1.318 | 0.227777 | 0.498719 |
| 5027 | 10475567 | <a href="#">NM_175034</a>          | <a href="#">317750</a>    | solute carrier family 24, memb | <a href="#">Slc24a5</a>            | 1.068 | 1.537 | 0.166864 | 0.417832 |
| 5028 | 10430186 | <a href="#">NM_175391</a>          | <a href="#">108956</a>    | apolipoprotein L 7c            | <a href="#">Apol7c</a>             | 1.068 | 0.724 | 0.492025 | 0.738272 |
| 5029 | 10384539 | <a href="#">NM_018861</a>          | <a href="#">55963</a>     | solute carrier family 1 (gluta | <a href="#">Slc1a4</a>             | 1.068 | 1.136 | 0.292404 | 0.568618 |
| 5030 | 10574153 |                                    |                           |                                |                                    | 1.068 | 1.141 | 0.290469 | 0.566681 |
| 5031 | 10575763 | <a href="#">NM_001081151</a>       | <a href="#">209239</a>    | giant axonal neuropathy        | <a href="#">Gan</a>                | 1.068 | 0.437 | 0.674918 | 0.855557 |
| 5032 | 10454414 | <a href="#">NM_181414</a>          | <a href="#">225326</a>    | phosphoinositide-3-kinase, cla | <a href="#">Pik3c3</a>             | 1.068 | 1.13  | 0.294731 | 0.570991 |
| 5033 | 10395365 | <a href="#">NM_011783</a>          | <a href="#">23795</a>     | anterior gradient 2 (Xenopus l | <a href="#">Agr2</a>               | 1.068 | 0.822 | 0.437554 | 0.696831 |
| 5034 | 10493658 |                                    |                           |                                |                                    | 1.068 | 0.701 | 0.505109 | 0.747176 |
| 5035 | 10583610 | <a href="#">NM_010561</a>          | <a href="#">16201</a>     | interleukin enhancer binding f | <a href="#">Ilf3</a>               | 1.068 | 0.857 | 0.41923  | 0.681547 |
| 5036 | 10390974 | <a href="#">NM_027563</a>          | <a href="#">16672</a>     | keratin 34                     | <a href="#">Krt34</a>              | 1.068 | 1.343 | 0.220038 | 0.488911 |
| 5037 | 10595324 | <a href="#">NM_010482</a>          | <a href="#">15551</a>     | 5-hydroxytryptamine (serotonin | <a href="#">Htr1b</a>              | 1.068 | 0.416 | 0.689348 | 0.863636 |
| 5038 | 10420616 | <a href="#">NM_011892</a>          | <a href="#">24053</a>     | sarcoglycan, gamma (dystrophin | <a href="#">Sgcg</a>               | 1.068 | 0.932 | 0.3817   | 0.651394 |
| 5039 | 10525726 | <a href="#">BC046909</a>           | <a href="#">72650</a>     | RIKEN cDNA 2810006K23 gene     | <a href="#">2810006K23Rik</a>      | 1.068 | 0.725 | 0.491537 | 0.738038 |
| 5040 | 10423577 | <a href="#">NM_026002</a>          | <a href="#">67154</a>     | Metadherin                     | <a href="#">Mtdh</a>               | 1.068 | 0.688 | 0.512749 | 0.753201 |
| 5041 | 10589462 | <a href="#">U08819</a>             | <a href="#">17758</a>     | microtubule-associated protein | <a href="#">Mtap4</a>              | 1.068 | 0.99  | 0.35427  | 0.626867 |
| 5042 | 10488291 | <a href="#">NM_015754</a>          | <a href="#">26450</a>     | retinoblastoma binding protein | <a href="#">Rbbp9</a>              | 1.068 | 0.605 | 0.563651 | 0.790247 |
| 5043 | 10413152 | <a href="#">ENSMUST00000075639</a> | <a href="#">76633</a>     | RIKEN cDNA 1700112E06 gene     | <a href="#">1700112E06Rik</a>      | 1.068 | 0.869 | 0.41271  | 0.676213 |
| 5044 | 10516695 | <a href="#">NM_199305</a>          | <a href="#">230770</a>    | transmembrane protein 39b      | <a href="#">Tmem39b</a>            | 1.068 | 0.949 | 0.373309 | 0.643602 |
| 5045 | 10606592 | <a href="#">XR_032090</a>          | <a href="#">245600</a>    | similar to transforming acidic | <a href="#">LOC245600</a>          | 1.068 | 1.311 | 0.229917 | 0.500912 |

|      |          |                                    |                           |                                 |                                    |  |       |        |          |          |
|------|----------|------------------------------------|---------------------------|---------------------------------|------------------------------------|--|-------|--------|----------|----------|
| 5046 | 10391610 |                                    |                           |                                 |                                    |  | 1.068 | 0.897  | 0.398865 | 0.665058 |
| 5047 | 10442250 |                                    |                           |                                 |                                    |  | 1.068 | 0.041  | 0.968177 | 0.987184 |
| 5048 | 10433027 | <a href="#">NM_018787</a>          | <a href="#">54615</a>     | neuropeptide FF-amide peptide   | <a href="#">Npff</a>               |  | 1.068 | 1.507  | 0.174356 | 0.427379 |
| 5049 | 10424667 | <a href="#">NM_198607</a>          | <a href="#">223626</a>    | RIKEN cDNA 4930572J05 gene      | <a href="#">4930572J05Rik</a>      |  | 1.068 | 1.16   | 0.283098 | 0.55841  |
| 5050 | 10349378 | <a href="#">AK140652</a>           | <a href="#">637749</a>    | hypothetical protein LOC637749  | <a href="#">LOC637749</a>          |  | 1.067 | 1.628  | 0.146218 | 0.388006 |
| 5051 | 10407742 | <a href="#">NM_033268</a>          | <a href="#">11472</a>     | actinin alpha 2                 | <a href="#">Actn2</a>              |  | 1.067 | 1.348  | 0.218389 | 0.486434 |
| 5052 | 10378909 | <a href="#">XR_034867</a>          | <a href="#">100048535</a> | similar to ribosomal protein L  | <a href="#">LOC100048535</a>       |  | 1.067 | 1.13   | 0.294614 | 0.570921 |
| 5053 | 10596271 | <a href="#">ENSMUST00000060084</a> | <a href="#">235567</a>    | DnaJ (Hsp40) homolog, subfamil  | <a href="#">Dnajc13</a>            |  | 1.067 | 0.316  | 0.76115  | 0.900379 |
| 5054 | 10432511 | <a href="#">NM_012025</a>          | <a href="#">26934</a>     | Rac GTPase-activating protein   | <a href="#">Racgap1</a>            |  | 1.067 | 0.496  | 0.634376 | 0.833748 |
| 5055 | 10580885 | <a href="#">NM_009974</a>          | <a href="#">13000</a>     | casein kinase 2, alpha prime p  | <a href="#">Csk2a2</a>             |  | 1.067 | 0.863  | 0.416111 | 0.679215 |
| 5056 | 10557148 | <a href="#">NM_021608</a>          | <a href="#">59288</a>     | dynactin 5                      | <a href="#">Dctn5</a>              |  | 1.067 | 0.945  | 0.375062 | 0.645055 |
| 5057 | 10383833 | <a href="#">NM_177616</a>          | <a href="#">216516</a>    | RIKEN cDNA 4930562D19 gene      | <a href="#">4930562D19Rik</a>      |  | 1.067 | 0.928  | 0.383525 | 0.652869 |
| 5058 | 10432939 | <a href="#">NM_144942</a>          | <a href="#">246277</a>    | cysteine sulfinic acid decarbo  | <a href="#">Csad</a>               |  | 1.067 | 1.601  | 0.152087 | 0.395831 |
| 5059 | 10426180 | <a href="#">NM_026813</a>          | <a href="#">71474</a>     | SAPS domain family, member 2    | <a href="#">Saps2</a>              |  | 1.067 | 0.752  | 0.47569  | 0.727129 |
| 5060 | 10519555 | <a href="#">NM_011075</a>          | <a href="#">18669</a>     | ATP-binding cassette, sub-fami  | <a href="#">Abcb1b</a>             |  | 1.067 | -0.137 | 0.894551 | 0.958419 |
| 5061 | 10566155 |                                    |                           |                                 |                                    |  | 1.067 | 1.259  | 0.247273 | 0.520646 |
| 5062 | 10435212 | <a href="#">NM_176840</a>          | <a href="#">106326</a>    | oxysterol binding protein-like  | <a href="#">Osbp11</a>             |  | 1.067 | 1.125  | 0.296597 | 0.57323  |
| 5063 | 10481023 | <a href="#">NM_153125</a>          | <a href="#">227648</a>    | SEC16 homolog A (S. cerevisiae) | <a href="#">Sec16a</a>             |  | 1.067 | 0.942  | 0.376553 | 0.646774 |
| 5064 | 10562731 | <a href="#">AK131849</a>           | <a href="#">638411</a>    | predicted gene, EG638411        | <a href="#">EG638411</a>           |  | 1.067 | 1.589  | 0.154775 | 0.400004 |
| 5065 | 10495193 | <a href="#">NM_008417</a>          | <a href="#">16490</a>     | potassium voltage-gated channe  | <a href="#">Kcna2</a>              |  | 1.067 | 1.267  | 0.244369 | 0.517487 |
| 5066 | 10436363 | <a href="#">ENSMUST00000099667</a> | <a href="#">78749</a>     | RIKEN cDNA 4631422O05 gene      | <a href="#">4631422O05Rik</a>      |  | 1.067 | 0.618  | 0.555439 | 0.784149 |
| 5067 | 10490169 | <a href="#">ENSMUST00000069669</a> | <a href="#">77310</a>     | RIKEN cDNA C030010B13 gene      | <a href="#">C030010B13Rik</a>      |  | 1.067 | 0.362  | 0.727462 | 0.881863 |
| 5068 | 10409857 | <a href="#">NM_178098</a>          | <a href="#">214639</a>    | RIKEN cDNA 4930486L24 gene      | <a href="#">4930486L24Rik</a>      |  | 1.067 | 1.66   | 0.139629 | 0.37797  |
| 5069 | 10579049 | <a href="#">AK129029</a>           | <a href="#">378466</a>    | predicted gene, ENSMUSG0000005  | <a href="#">ENSMUSG00000057924</a> |  | 1.067 | 0.194  | 0.851748 | 0.940193 |
| 5070 | 10592988 | <a href="#">NM_145400</a>          | <a href="#">140630</a>    | ubiquitination factor E4A, UFD  | <a href="#">Ube4a</a>              |  | 1.067 | 0.826  | 0.435464 | 0.695585 |
| 5071 | 10403919 | <a href="#">NM_016684</a>          | <a href="#">22758</a>     | zinc finger and SCAN-domain co  | <a href="#">Zscan12</a>            |  | 1.067 | 0.741  | 0.482206 | 0.730954 |
| 5072 | 10488646 | <a href="#">NM_001037752</a>       | <a href="#">433490</a>    | predicted gene, OTTMUSG0000001  | <a href="#">OTTMUSG00000015859</a> |  | 1.067 | 1.358  | 0.215451 | 0.482533 |
| 5073 | 10571005 | <a href="#">ENSMUST00000059474</a> | <a href="#">670853</a>    | RIKEN cDNA D830025C05 gene      | <a href="#">D830025C05Rik</a>      |  | 1.067 | 0.901  | 0.396688 | 0.664034 |
| 5074 | 10557009 | <a href="#">NM_007908</a>          | <a href="#">13631</a>     | eukaryotic elongation factor-2  | <a href="#">Eef2k</a>              |  | 1.067 | 0.553  | 0.597154 | 0.810309 |
| 5075 | 10497222 | <a href="#">NM_133218</a>          | <a href="#">170753</a>    | zinc finger protein 704         | <a href="#">Zfp704</a>             |  | 1.067 | 0.931  | 0.382087 | 0.651596 |
| 5076 | 10369738 | <a href="#">NM_019812</a>          | <a href="#">93759</a>     | sirtuin 1 (silent mating type   | <a href="#">Sirt1</a>              |  | 1.067 | 0.583  | 0.577358 | 0.797771 |
| 5077 | 10354704 | <a href="#">NM_031179</a>          | <a href="#">81898</a>     | splicing factor 3b, subunit 1   | <a href="#">Sf3b1</a>              |  | 1.067 | 1.305  | 0.232105 | 0.502819 |
| 5078 | 10469954 | <a href="#">NM_177344</a>          | <a href="#">227615</a>    | RIKEN cDNA C730025P13 gene      | <a href="#">C730025P13Rik</a>      |  | 1.067 | 0.453  | 0.66399  | 0.850267 |
| 5079 | 10504751 |                                    |                           |                                 |                                    |  | 1.067 | 0.583  | 0.577945 | 0.798124 |
| 5080 | 10406287 | <a href="#">NM_001081352</a>       | <a href="#">218343</a>    | cDNA sequence AK129128          | <a href="#">AK129128</a>           |  | 1.067 | 0.907  | 0.393735 | 0.661649 |
| 5081 | 10398211 | <a href="#">NM_001044380</a>       | <a href="#">214305</a>    | hedgehog interacting protein-1  | <a href="#">Hhip1</a>              |  | 1.067 | 1.036  | 0.333548 | 0.609432 |
| 5082 | 10379944 | <a href="#">NM_011536</a>          | <a href="#">21387</a>     | T-box 4                         | <a href="#">Tbx4</a>               |  | 1.067 | 1.385  | 0.207379 | 0.471841 |
| 5083 | 10421188 | <a href="#">ENSMUST00000050569</a> | <a href="#">71843</a>     | R3H domain and coiled-coil con  | <a href="#">R3hcc1</a>             |  | 1.067 | 0.415  | 0.690453 | 0.864251 |
| 5084 | 10409396 | <a href="#">NM_011307</a>          | <a href="#">20184</a>     | ubiquitin interaction motif co  | <a href="#">Uimc1</a>              |  | 1.067 | 0.7    | 0.506073 | 0.747966 |
| 5085 | 10434366 | <a href="#">NM_007889</a>          | <a href="#">13544</a>     | dishevelled 3, dsh homolog (Dr  | <a href="#">Dvl3</a>               |  | 1.067 | 0.853  | 0.420836 | 0.683211 |
| 5086 | 10568714 | <a href="#">NM_001081117</a>       | <a href="#">17345</a>     | antigen identified by monoclon  | <a href="#">Mki67</a>              |  | 1.067 | 1.075  | 0.31683  | 0.594045 |
| 5087 | 10483626 | <a href="#">NM_010054</a>          | <a href="#">13392</a>     | distal-less homeobox 2          | <a href="#">Dlx2</a>               |  | 1.067 | 1.107  | 0.303672 | 0.579864 |
| 5088 | 10522655 | <a href="#">XM_916109</a>          | <a href="#">320827</a>    | RIKEN cDNA C530008M17 gene      | <a href="#">C530008M17Rik</a>      |  | 1.067 | 0.269  | 0.795317 | 0.916955 |
| 5089 | 10535103 | <a href="#">NM_174850</a>          | <a href="#">231830</a>    | MICAL-like 2                    | <a href="#">Micall2</a>            |  | 1.066 | 1.084  | 0.313098 | 0.589668 |
| 5090 | 10551421 | <a href="#">ENSMUST00000108336</a> | <a href="#">22718</a>     | zinc finger protein 60          | <a href="#">Zfp60</a>              |  | 1.066 | 0.238  | 0.818698 | 0.92793  |
| 5091 | 10480734 | <a href="#">NM_008963</a>          | <a href="#">19215</a>     | prostaglandin D2 synthase (bra  | <a href="#">Ptgds</a>              |  | 1.066 | 1.305  | 0.231948 | 0.502664 |
| 5092 | 10431339 | <a href="#">ENSMUST00000109353</a> | <a href="#">328580</a>    | tubulin, gamma complex associa  | <a href="#">Tubgcp6</a>            |  | 1.066 | 0.618  | 0.555746 | 0.784373 |
| 5093 | 10398695 | <a href="#">NM_021516</a>          | <a href="#">17169</a>     | MAP/microtubule affinity-regul  | <a href="#">Mark3</a>              |  | 1.066 | 1.2    | 0.268146 | 0.542786 |
| 5094 | 10565819 | <a href="#">NM_175316</a>          | <a href="#">101488</a>    | solute carrier organic anion t  | <a href="#">Slco2b1</a>            |  | 1.066 | 1.204  | 0.266713 | 0.541363 |
| 5095 | 10460085 | <a href="#">NM_023149</a>          | <a href="#">66054</a>     | CNDP dipeptidase 2 (metallopep  | <a href="#">Cndp2</a>              |  | 1.066 | 0.767  | 0.467228 | 0.72007  |
| 5096 | 10349376 |                                    |                           |                                 |                                    |  | 1.066 | 0.582  | 0.578357 | 0.798316 |

|      |          |                                    |                           |                                |                                    |       |        |          |          |
|------|----------|------------------------------------|---------------------------|--------------------------------|------------------------------------|-------|--------|----------|----------|
| 5097 | 10356457 | <a href="#">NM_008299</a>          | <a href="#">15504</a>     | DnaJ (Hsp40) homolog, subfamil | <a href="#">Dnajb3</a>             | 1.066 | 0.575  | 0.582729 | 0.800924 |
| 5098 | 10396068 | <a href="#">NM_001081406</a>       | <a href="#">69706</a>     | peptidylprolyl isomerase (cycl | <a href="#">Ppil5</a>              | 1.066 | 0.817  | 0.440047 | 0.699124 |
| 5099 | 10431935 | <a href="#">NM_178114</a>          | <a href="#">105827</a>    | adhesion molecule with Ig like | <a href="#">Amigo2</a>             | 1.066 | 0.337  | 0.745853 | 0.891987 |
| 5100 | 10578768 |                                    |                           |                                |                                    | 1.066 | 0.625  | 0.551144 | 0.781221 |
| 5101 | 10373093 | <a href="#">NM_030714</a>          | <a href="#">80904</a>     | deltex 3 homolog (Drosophila)  | <a href="#">Dtx3</a>               | 1.066 | 1.279  | 0.240626 | 0.513659 |
| 5102 | 10467730 | <a href="#">NM_198108</a>          | <a href="#">226123</a>    | cDNA sequence BC023055         | <a href="#">BC023055</a>           | 1.066 | 0.568  | 0.587164 | 0.80408  |
| 5103 | 10384797 | <a href="#">NM_181577</a>          | <a href="#">216613</a>    | coiled-coil domain containing  | <a href="#">Ccdc85a</a>            | 1.066 | 0.744  | 0.480163 | 0.729941 |
| 5104 | 10545339 | <a href="#">NM_025430</a>          | <a href="#">66223</a>     | mitochondrial ribosomal protei | <a href="#">Mrpl35</a>             | 1.066 | 0.241  | 0.816306 | 0.92666  |
| 5105 | 10519105 | <a href="#">NM_011385</a>          | <a href="#">20481</a>     | ski sarcoma viral oncogene hom | <a href="#">Ski</a>                | 1.066 | 0.998  | 0.350566 | 0.624042 |
| 5106 | 10571221 | <a href="#">NM_001112729</a>       | <a href="#">234138</a>    | cDNA sequence BC019943         | <a href="#">BC019943</a>           | 1.066 | -0.131 | 0.899144 | 0.960129 |
| 5107 | 10536425 |                                    |                           |                                |                                    | 1.066 | 1.132  | 0.293736 | 0.569741 |
| 5108 | 10568638 | <a href="#">NM_009479</a>          | <a href="#">22276</a>     | uroporphyrinogen III synthase  | <a href="#">Uros</a>               | 1.066 | 0.469  | 0.652661 | 0.844494 |
| 5109 | 10468519 | <a href="#">NM_172429</a>          | <a href="#">76479</a>     | survival motor neuron domain c | <a href="#">Smndc1</a>             | 1.066 | 0.156  | 0.880299 | 0.952471 |
| 5110 | 10477595 | <a href="#">NM_015770</a>          | <a href="#">50518</a>     | nonagouti                      | <a href="#">a</a>                  | 1.066 | 1.44   | 0.191768 | 0.451028 |
| 5111 | 10409282 | <a href="#">NM_013846</a>          | <a href="#">26564</a>     | receptor tyrosine kinase-like  | <a href="#">Ror2</a>               | 1.066 | 1.545  | 0.165009 | 0.415127 |
| 5112 | 10390175 | <a href="#">NM_033217</a>          | <a href="#">18053</a>     | nerve growth factor receptor ( | <a href="#">Ngfr</a>               | 1.066 | 1.149  | 0.287261 | 0.562985 |
| 5113 | 10433691 | <a href="#">NM_010946</a>          | <a href="#">18203</a>     | N-terminal Asn amidase         | <a href="#">Ntan1</a>              | 1.066 | 0.65   | 0.53594  | 0.769309 |
| 5114 | 10354141 | <a href="#">NM_001029878</a>       | <a href="#">381338</a>    | LON peptidase N-terminal domai | <a href="#">Lonrf2</a>             | 1.066 | 0.449  | 0.66649  | 0.851355 |
| 5115 | 10525419 | <a href="#">NM_011027</a>          | <a href="#">18439</a>     | purinergic receptor P2X, ligan | <a href="#">P2rx7</a>              | 1.066 | 1.547  | 0.164453 | 0.414282 |
| 5116 | 10369927 |                                    |                           |                                |                                    | 1.066 | 1.311  | 0.23014  | 0.501074 |
| 5117 | 10397179 | <a href="#">NM_028821</a>          | <a href="#">105000</a>    | dynein, axonemal, light chain  | <a href="#">Dnalc1</a>             | 1.066 | 0.747  | 0.478717 | 0.729103 |
| 5118 | 10577446 | <a href="#">NM_139222</a>          | <a href="#">246082</a>    | defensin beta 15               | <a href="#">Defb15</a>             | 1.066 | 0.796  | 0.45156  | 0.708606 |
| 5119 | 10496204 | <a href="#">NM_173762</a>          | <a href="#">229841</a>    | centromere protein E           | <a href="#">Cenpe</a>              | 1.066 | 1.092  | 0.310009 | 0.586741 |
| 5120 | 10563112 | <a href="#">NR_001277</a>          | <a href="#">27208</a>     | small nucleolar RNA, C/D box 3 | <a href="#">Snord33</a>            | 1.066 | 0.417  | 0.688606 | 0.863114 |
| 5121 | 10367173 | <a href="#">NM_008600</a>          | <a href="#">17339</a>     | major intrinsic protein of eye | <a href="#">Mip</a>                | 1.066 | 0.894  | 0.399974 | 0.665979 |
| 5122 | 10521537 | <a href="#">NM_001081106</a>       | <a href="#">231162</a>    | cytokine like 1                | <a href="#">Cyt1</a>               | 1.066 | 1.179  | 0.275989 | 0.550828 |
| 5123 | 10400572 | <a href="#">NM_025707</a>          | <a href="#">66689</a>     | kelch-like 28 (Drosophila)     | <a href="#">Kihl28</a>             | 1.066 | 0.908  | 0.39337  | 0.661285 |
| 5124 | 10406742 | <a href="#">BC016527</a>           | <a href="#">67463</a>     | RIKEN cDNA 1200014M14 gene     | <a href="#">1200014M14Rik</a>      | 1.066 | 1.145  | 0.288738 | 0.564814 |
| 5125 | 10483584 | <a href="#">NM_145524</a>          | <a href="#">228019</a>    | methyltransferase like 8       | <a href="#">Mettl8</a>             | 1.066 | 0.688  | 0.513185 | 0.753594 |
| 5126 | 10445855 | <a href="#">NM_177052</a>          | <a href="#">319991</a>    | kinesin family member 6        | <a href="#">Kif6</a>               | 1.066 | 1.514  | 0.172621 | 0.424951 |
| 5127 | 10540911 | <a href="#">NM_199033</a>          | <a href="#">381802</a>    | tRNA splicing endonuclease 2 h | <a href="#">Tsen2</a>              | 1.066 | 0.713  | 0.498541 | 0.742429 |
| 5128 | 10421184 | <a href="#">ENSMUST00000084187</a> | <a href="#">100038740</a> | predicted gene, ENSMUSG0000007 | <a href="#">ENSMUSG00000071316</a> | 1.066 | 0.861  | 0.41686  | 0.679627 |
| 5129 | 10500362 | <a href="#">NM_027241</a>          | <a href="#">69870</a>     | polymerase (RNA) III (DNA dire | <a href="#">Polr3gl</a>            | 1.066 | 1.114  | 0.301004 | 0.577272 |
| 5130 | 10489831 | <a href="#">NM_001109906</a>       | <a href="#">20853</a>     | staufer (RNA binding protein)  | <a href="#">Stau1</a>              | 1.066 | 0.861  | 0.416756 | 0.679627 |
| 5131 | 10473570 | <a href="#">NM_001011519</a>       | <a href="#">258220</a>    | olfactory receptor 1148        | <a href="#">Olf1148</a>            | 1.065 | 0.793  | 0.453026 | 0.709661 |
| 5132 | 10377550 | <a href="#">NM_011640</a>          | <a href="#">22059</a>     | transformation related protein | <a href="#">Trp53</a>              | 1.065 | 0.871  | 0.41185  | 0.67572  |
| 5133 | 10499552 | <a href="#">NM_007910</a>          | <a href="#">13639</a>     | ephrin A4                      | <a href="#">Efna4</a>              | 1.065 | 0.74   | 0.482926 | 0.731557 |
| 5134 | 10603180 | <a href="#">XM_913285</a>          | <a href="#">637566</a>    | predicted gene, EG637566       | <a href="#">EG637566</a>           | 1.065 | 1.482  | 0.180773 | 0.436709 |
| 5135 | 10457536 | <a href="#">ENSMUST00000080906</a> | <a href="#">225187</a>    | ankyrin repeat domain 29       | <a href="#">Ankrd29</a>            | 1.065 | 1.271  | 0.243299 | 0.516291 |
| 5136 | 10534718 | <a href="#">NM_011639</a>          | <a href="#">22051</a>     | thyroid hormone receptor inter | <a href="#">Trip6</a>              | 1.065 | 0.582  | 0.578232 | 0.79826  |
| 5137 | 10427280 | <a href="#">NM_010462</a>          | <a href="#">209448</a>    | homeo box C10                  | <a href="#">Hoxc10</a>             | 1.065 | 0.493  | 0.636471 | 0.834887 |
| 5138 | 10508829 | <a href="#">NM_016693</a>          | <a href="#">53608</a>     | mitogen-activated protein kina | <a href="#">Map3k6</a>             | 1.065 | 1.067  | 0.320544 | 0.597513 |
| 5139 | 10399021 | <a href="#">NM_153776</a>          | <a href="#">69195</a>     | transmembrane protein 121      | <a href="#">Tmem121</a>            | 1.065 | 0.784  | 0.457932 | 0.713313 |
| 5140 | 10588538 | <a href="#">BC049769</a>           | <a href="#">74267</a>     | IQ motif containing F1         | <a href="#">Iqcf1</a>              | 1.065 | 0.51   | 0.625211 | 0.829015 |
| 5141 | 10466282 | <a href="#">NM_146809</a>          | <a href="#">258805</a>    | olfactory receptor 1426        | <a href="#">Olf1426</a>            | 1.065 | 0.749  | 0.477705 | 0.728391 |
| 5142 | 10493876 | <a href="#">NM_011474</a>          | <a href="#">20762</a>     | small proline-rich protein 2H  | <a href="#">Spr2h</a>              | 1.065 | 1.232  | 0.256431 | 0.530714 |
| 5143 | 10461408 | <a href="#">NM_144538</a>          | <a href="#">74760</a>     | RAB3A interacting protein (rab | <a href="#">Rab3il1</a>            | 1.065 | 1.866  | 0.103101 | 0.315343 |
| 5144 | 10591967 | <a href="#">NM_023277</a>          | <a href="#">83964</a>     | junction adhesion molecule 3   | <a href="#">Jam3</a>               | 1.065 | 0.597  | 0.568799 | 0.793578 |
| 5145 | 10478192 | <a href="#">AK016829</a>           | <a href="#">71081</a>     | RIKEN cDNA 4933416E03 gene     | <a href="#">4933416E03Rik</a>      | 1.065 | 0.835  | 0.430572 | 0.691322 |
| 5146 | 10517883 | <a href="#">NM_025383</a>          | <a href="#">66147</a>     | NECAP endocytosis associated 2 | <a href="#">Necap2</a>             | 1.065 | 0.809  | 0.444192 | 0.702635 |
| 5147 | 10384365 |                                    |                           |                                |                                    | 1.065 | 1.064  | 0.321785 | 0.598601 |
| 5148 | 10512947 |                                    |                           |                                |                                    | 1.065 | 0.564  | 0.589873 | 0.805977 |
| 5149 | 10443589 | <a href="#">NM_148926</a>          | <a href="#">21769</a>     | zinc finger, AN1-type domain 3 | <a href="#">Zfand3</a>             | 1.065 | 0.482  | 0.643825 | 0.838809 |

|      |          |                                    |                           |                                |                               |       |       |          |          |
|------|----------|------------------------------------|---------------------------|--------------------------------|-------------------------------|-------|-------|----------|----------|
| 5150 | 10491607 | <a href="#">ENSMUST00000057272</a> | <a href="#">229227</a>    | RIKEN cDNA 4932438A13 gene     | <a href="#">4932438A13Rik</a> | 1.065 | 0.549 | 0.599682 | 0.812038 |
| 5151 | 10401586 | <a href="#">NM_175198</a>          | <a href="#">73422</a>     | prospero homeobox 2            | <a href="#">Prox2</a>         | 1.065 | 0.98  | 0.358596 | 0.630638 |
| 5152 | 10449225 | <a href="#">NM_011933</a>          | <a href="#">26378</a>     | 2-4-dienoyl-Coenzyme A reducta | <a href="#">Decr2</a>         | 1.065 | 1.003 | 0.348346 | 0.622132 |
| 5153 | 10521222 | <a href="#">NM_001102444</a>       | <a href="#">11518</a>     | adducin 1 (alpha)              | <a href="#">Add1</a>          | 1.065 | 0.546 | 0.601313 | 0.812925 |
| 5154 | 10456184 | <a href="#">NM_133237</a>          | <a href="#">494504</a>    | adenomatosis polyposis coli do | <a href="#">Apcdd1</a>        | 1.065 | 1.315 | 0.228925 | 0.499975 |
| 5155 | 10430297 | <a href="#">NM_013645</a>          | <a href="#">19293</a>     | parvalbumin                    | <a href="#">Pvalb</a>         | 1.065 | 0.412 | 0.69255  | 0.865136 |
| 5156 | 10534854 | <a href="#">NM_030037</a>          | <a href="#">68929</a>     | motile sperm domain containing | <a href="#">Mospd3</a>        | 1.065 | 0.712 | 0.498676 | 0.742429 |
| 5157 | 10380956 | <a href="#">NM_001007461</a>       | <a href="#">450219</a>    | gasdermin A3                   | <a href="#">Gsdma3</a>        | 1.065 | 1.601 | 0.152042 | 0.395822 |
| 5158 | 10401160 | <a href="#">BC066067</a>           | <a href="#">268567</a>    | RIKEN cDNA 6330442E10 gene     | <a href="#">6330442E10Rik</a> | 1.065 | 0.474 | 0.649245 | 0.842415 |
| 5159 | 10404061 | <a href="#">NM_175664</a>          | <a href="#">319178</a>    | histone cluster 1, H2bb        | <a href="#">Hist1h2bb</a>     | 1.065 | 0.449 | 0.666945 | 0.851389 |
| 5160 | 10390963 | <a href="#">NM_027983</a>          | <a href="#">71888</a>     | keratin 33A                    | <a href="#">Krt33a</a>        | 1.065 | 0.5   | 0.63219  | 0.832782 |
| 5161 | 10348301 | <a href="#">NM_009118</a>          | <a href="#">20215</a>     | retinal S-antigen              | <a href="#">Sag</a>           | 1.065 | 1.489 | 0.178798 | 0.433892 |
| 5162 | 10517274 | <a href="#">NM_029100</a>          | <a href="#">74777</a>     | selenoprotein N, 1             | <a href="#">Sepn1</a>         | 1.065 | 0.768 | 0.466982 | 0.719977 |
| 5163 | 10522661 | <a href="#">ENSMUST00000048811</a> | <a href="#">320827</a>    | RIKEN cDNA C530008M17 gene     | <a href="#">C530008M17Rik</a> | 1.065 | 0.518 | 0.620053 | 0.825229 |
| 5164 | 10595871 | <a href="#">NM_022319</a>          | <a href="#">64085</a>     | calyntenin 2                   | <a href="#">Clstn2</a>        | 1.065 | 1.125 | 0.296619 | 0.57323  |
| 5165 | 10436841 | <a href="#">NM_008349</a>          | <a href="#">16155</a>     | interleukin 10 receptor, beta  | <a href="#">Il10rb</a>        | 1.065 | 0.484 | 0.642486 | 0.838098 |
| 5166 | 10466087 | <a href="#">NM_134142</a>          | <a href="#">68539</a>     | transmembrane protein 109      | <a href="#">Tmem109</a>       | 1.065 | 0.943 | 0.376425 | 0.64661  |
| 5167 | 10603651 | <a href="#">XM_001474571</a>       | <a href="#">100045823</a> | hypothetical protein LOC100045 | <a href="#">LOC100045823</a>  | 1.065 | 0.604 | 0.564561 | 0.790721 |
| 5168 | 10500406 | <a href="#">NM_018767</a>          | <a href="#">54215</a>     | CD160 antigen                  | <a href="#">Cd160</a>         | 1.065 | 0.494 | 0.636085 | 0.834743 |
| 5169 | 10350896 | <a href="#">NM_007495</a>          | <a href="#">11899</a>     | astrotactin 1                  | <a href="#">Astn1</a>         | 1.065 | 0.464 | 0.656132 | 0.846043 |
| 5170 | 10398874 | <a href="#">NM_013929</a>          | <a href="#">30954</a>     | SIVA1, apoptosis-inducing fact | <a href="#">Siva1</a>         | 1.064 | 0.285 | 0.783353 | 0.911971 |
| 5171 | 10463515 | <a href="#">NM_176785</a>          | <a href="#">20170</a>     | Hermansky-Pudlak syndrome 6    | <a href="#">Hps6</a>          | 1.064 | 0.751 | 0.47641  | 0.72757  |
| 5172 | 10397359 | <a href="#">NM_016767</a>          | <a href="#">53314</a>     | basic leucine zipper transcrip | <a href="#">Batf</a>          | 1.064 | 1.551 | 0.16367  | 0.412879 |
| 5173 | 10552938 | <a href="#">NM_198190</a>          | <a href="#">78405</a>     | neurotrophin 5                 | <a href="#">Ntf5</a>          | 1.064 | 0.909 | 0.392913 | 0.660814 |
| 5174 | 10575021 | <a href="#">NM_011764</a>          | <a href="#">22751</a>     | zinc finger protein 90         | <a href="#">Zfp90</a>         | 1.064 | 1.084 | 0.313135 | 0.589668 |
| 5175 | 10478897 | <a href="#">NM_011201</a>          | <a href="#">19246</a>     | protein tyrosine phosphatase,  | <a href="#">Ptpn1</a>         | 1.064 | 0.395 | 0.704491 | 0.870894 |
| 5176 | 10383575 | <a href="#">NM_029878</a>          | <a href="#">108903</a>    | tubulin-specific chaperone d   | <a href="#">Tbcd</a>          | 1.064 | 1.325 | 0.225575 | 0.495847 |
| 5177 | 10500117 | <a href="#">BC092540</a>           | <a href="#">229588</a>    | gene model 128, (NCBI)         | <a href="#">Gm128</a>         | 1.064 | 1.257 | 0.248044 | 0.521388 |
| 5178 | 10491060 | <a href="#">XR_004805</a>          | <a href="#">675593</a>    | similar to spindlin            | <a href="#">LOC675593</a>     | 1.064 | 0.532 | 0.610985 | 0.819348 |
| 5179 | 10479945 | <a href="#">ENSMUST00000056627</a> | <a href="#">72248</a>     | RIKEN cDNA 1700014B07 gene     | <a href="#">1700014B07Rik</a> | 1.064 | 0.67  | 0.523932 | 0.760561 |
| 5180 | 10515714 | <a href="#">ENSMUST00000075406</a> | <a href="#">230676</a>    | cDNA sequence BC059842         | <a href="#">BC059842</a>      | 1.064 | 1.42  | 0.197224 | 0.457905 |
| 5181 | 10435832 | <a href="#">NM_001029889</a>       | <a href="#">207806</a>    | gene model 608, (NCBI)         | <a href="#">Gm608</a>         | 1.064 | 1.266 | 0.244961 | 0.518204 |
| 5182 | 10416126 | <a href="#">NM_010095</a>          | <a href="#">13592</a>     | early B-cell factor 2          | <a href="#">Ebf2</a>          | 1.064 | 1.299 | 0.233841 | 0.505143 |
| 5183 | 10356461 | <a href="#">BC057309</a>           | <a href="#">381280</a>    | RIKEN cDNA 6430706D22 gene     | <a href="#">6430706D22Rik</a> | 1.064 | 1.007 | 0.346384 | 0.62041  |
| 5184 | 10476952 | <a href="#">NM_172117</a>          | <a href="#">12497</a>     | ectonucleoside triphosphate di | <a href="#">Entpd6</a>        | 1.064 | 1.205 | 0.266268 | 0.541183 |
| 5185 | 10482139 | <a href="#">NM_026176</a>          | <a href="#">67466</a>     | phosducin-like                 | <a href="#">Pdc1</a>          | 1.064 | 0.801 | 0.448646 | 0.706217 |
| 5186 | 10375941 | <a href="#">NM_011694</a>          | <a href="#">22333</a>     | voltage-dependent anion channe | <a href="#">Vdac1</a>         | 1.064 | 0.321 | 0.757241 | 0.898087 |
| 5187 | 10408879 | <a href="#">NM_001033399</a>       | <a href="#">328232</a>    | glucose-fructose oxidoreductas | <a href="#">Gfod1</a>         | 1.064 | 1.301 | 0.233227 | 0.504383 |
| 5188 | 10594519 | <a href="#">NM_178933</a>          | <a href="#">330962</a>    | organic solute transporter bet | <a href="#">Ostb</a>          | 1.064 | 1.184 | 0.274006 | 0.548672 |
| 5189 | 10401882 | <a href="#">NM_175335</a>          | <a href="#">83602</a>     | general transcription factor I | <a href="#">Gtf2a1</a>        | 1.064 | 0.931 | 0.382138 | 0.651607 |
| 5190 | 10544444 | <a href="#">NM_203396</a>          | <a href="#">403088</a>    | experimental autoimmune prosta | <a href="#">Eapa2</a>         | 1.064 | 1.094 | 0.30917  | 0.585866 |
| 5191 | 10593123 | <a href="#">NM_011526</a>          | <a href="#">21345</a>     | transgelin                     | <a href="#">Tagln</a>         | 1.064 | 0.27  | 0.79489  | 0.916821 |
| 5192 | 10463209 | <a href="#">BC049703</a>           | <a href="#">66765</a>     | RIKEN cDNA 4933411K16 gene     | <a href="#">4933411K16Rik</a> | 1.064 | 1.21  | 0.264389 | 0.539495 |
| 5193 | 10401968 | <a href="#">NM_008079</a>          | <a href="#">14420</a>     | galactosylceramidase           | <a href="#">Galc</a>          | 1.064 | 0.563 | 0.590714 | 0.806356 |
| 5194 | 10574659 | <a href="#">NM_011939</a>          | <a href="#">26386</a>     | heat shock transcription facto | <a href="#">Hsf4</a>          | 1.064 | 1.372 | 0.211346 | 0.476813 |
| 5195 | 10554081 | <a href="#">NM_025905</a>          | <a href="#">67009</a>     | tetratricopeptide repeat domai | <a href="#">Ttc23</a>         | 1.064 | 0.231 | 0.823458 | 0.929428 |
| 5196 | 10500982 | <a href="#">NM_001033780</a>       | <a href="#">433638</a>    | RIKEN cDNA I830077J02 gene     | <a href="#">I830077J02Rik</a> | 1.064 | 1.338 | 0.221556 | 0.491045 |
| 5197 | 10451736 | <a href="#">NM_028162</a>          | <a href="#">72238</a>     | TBC1 domain family, member 5   | <a href="#">Tbc1d5</a>        | 1.064 | 0.92  | 0.387394 | 0.656334 |
| 5198 | 10365723 | <a href="#">XM_001476977</a>       | <a href="#">100041769</a> | similar to protein translation | <a href="#">LOC100041769</a>  | 1.064 | 0.902 | 0.396148 | 0.663738 |
| 5199 | 10599792 | <a href="#">NM_133251</a>          | <a href="#">170828</a>    | vestigial like 1 homolog (Dros | <a href="#">Vgll1</a>         | 1.064 | 1.402 | 0.202447 | 0.465275 |
| 5200 | 10542745 | <a href="#">NM_026218</a>          | <a href="#">67529</a>     | FGFR1 oncogene partner 2       | <a href="#">Fgfr1op2</a>      | 1.064 | 0.885 | 0.404825 | 0.669594 |
| 5201 | 10389421 | <a href="#">NM_027421</a>          | <a href="#">70422</a>     | integrator complex subunit 2   | <a href="#">Ints2</a>         | 1.064 | 1.022 | 0.33972  | 0.615145 |
| 5202 | 10555052 | <a href="#">NM_010502</a>          | <a href="#">11256</a>     | fractured cell-associated tra  | <a href="#">Frat1</a>         | 1.064 | 0.541 | 0.605044 | 0.815765 |

|      |          |                                     |                           |                                                               |                                    |       |       |          |          |
|------|----------|-------------------------------------|---------------------------|---------------------------------------------------------------|------------------------------------|-------|-------|----------|----------|
| 5202 | 10533933 | <a href="#">NM_019302</a>           | <a href="#">14530</a>     | fractured canus expressed tra                                 | <a href="#">Fxc1</a>               | 1.004 | 0.341 | 0.003044 | 0.813703 |
| 5203 | 10486324 | <a href="#">AK016792</a>            | <a href="#">100036539</a> | predicted gene, OTTMUSG0000001                                | <a href="#">OTTMUSG00000015282</a> | 1.064 | 1.241 | 0.253354 | 0.527654 |
| 5204 | 10477004 | <a href="#">XR_030619</a>           | <a href="#">100044416</a> | similar to alpha-tubulin isoty                                | <a href="#">LOC100044416</a>       | 1.064 | 1.099 | 0.30705  | 0.583646 |
| 5205 | 10498978 | <a href="#">NM_023624</a>           | <a href="#">79235</a>     | lecithin-retinol acyltransfera                                | <a href="#">Lrat</a>               | 1.064 | 0.24  | 0.81708  | 0.92719  |
| 5206 | 10413697 | <a href="#">NM_001081251</a>        | <a href="#">66923</a>     | polybromo 1                                                   | <a href="#">Pbrm1</a>              | 1.064 | 1.191 | 0.271264 | 0.545988 |
| 5207 | 10442363 | <a href="#">NM_020487</a>           | <a href="#">57256</a>     | protease, serine, 21                                          | <a href="#">Prss21</a>             | 1.064 | 1.118 | 0.299271 | 0.575358 |
| 5208 | 10526675 | <a href="#">NM_023910</a>           | <a href="#">78829</a>     | TSC22 domain family 4                                         | <a href="#">Tsc22d4</a>            | 1.064 | 1.025 | 0.338661 | 0.614222 |
| 5209 | 10376490 | <a href="#">NM_139298</a>           | <a href="#">216795</a>    | wingless-type MMTV integration                                | <a href="#">Wnt9a</a>              | 1.064 | 0.711 | 0.499558 | 0.742751 |
| 5210 | 10562304 |                                     |                           |                                                               |                                    | 1.064 | 1.006 | 0.346892 | 0.621109 |
| 5211 | 10599537 | <a href="#">NM_011398</a>           | <a href="#">20523</a>     | solute carrier family 25 (mito Ras-related associated with di | <a href="#">Slc25a14</a>           | 1.064 | 0.688 | 0.513002 | 0.753467 |
| 5212 | 10581151 | <a href="#">NM_019662</a>           | <a href="#">56437</a>     |                                                               | <a href="#">Rrad</a>               | 1.064 | 1.476 | 0.182301 | 0.438828 |
| 5213 | 10413951 | <a href="#">NM_153800</a>           | <a href="#">239027</a>    | Rho GTPase activating protein                                 | <a href="#">Arhgap22</a>           | 1.064 | 1.092 | 0.310059 | 0.586761 |
| 5214 | 10394488 | <a href="#">NM_010770</a>           | <a href="#">17182</a>     | matrilin 3                                                    | <a href="#">Matn3</a>              | 1.063 | 0.783 | 0.458595 | 0.713672 |
| 5215 | 10511803 | <a href="#">ENSMUST00000029915</a>  | <a href="#">77032</a>     | RIKEN cDNA 2610029I01 gene                                    | <a href="#">2610029I01Rik</a>      | 1.063 | 0.158 | 0.878432 | 0.95179  |
| 5216 | 10446402 | <a href="#">NM_146081</a>           | <a href="#">70351</a>     | protein phosphatase 4, regulat                                | <a href="#">Ppp4r1</a>             | 1.063 | 1.718 | 0.128146 | 0.358993 |
| 5217 | 10563893 | <a href="#">ENSMUST00000098404</a>  | <a href="#">100038650</a> | predicted gene, ENSMUSG0000007                                | <a href="#">ENSMUSG00000074087</a> | 1.063 | 0.072 | 0.944231 | 0.977948 |
| 5218 | 10557742 | <a href="#">NM_172748</a>           | <a href="#">233902</a>    | F-box and leucine-rich repeat                                 | <a href="#">Fbx119</a>             | 1.063 | 1.473 | 0.18299  | 0.439824 |
| 5219 | 10587558 | <a href="#">BC043710</a>            | <a href="#">320615</a>    | dopey family member 1                                         | <a href="#">Dopey1</a>             | 1.063 | 0.663 | 0.528193 | 0.763579 |
| 5220 | 10573578 | <a href="#">BC089623</a>            | <a href="#">414077</a>    | cDNA sequence BC056474                                        | <a href="#">BC056474</a>           | 1.063 | 0.079 | 0.938988 | 0.976218 |
| 5221 | 10417725 |                                     |                           |                                                               |                                    | 1.063 | 0.049 | 0.961937 | 0.985362 |
| 5222 | 10477237 | <a href="#">BC020535</a>            | <a href="#">228788</a>    | cDNA sequence BC020535                                        | <a href="#">BC020535</a>           | 1.063 | 0.807 | 0.445422 | 0.703573 |
| 5223 | 10352562 | <a href="#">NM_026367</a>           | <a href="#">67769</a>     | G patch domain containing 2                                   | <a href="#">Gpatch2</a>            | 1.063 | 0.383 | 0.71255  | 0.874059 |
| 5224 | 10494092 | <a href="#">NM_172683</a>           | <a href="#">229584</a>    | pogo transposable element with                                | <a href="#">Pogz</a>               | 1.063 | 0.919 | 0.387564 | 0.656413 |
| 5225 | 10401443 | <a href="#">BC062132</a>            | <a href="#">217705</a>    | RIKEN cDNA 9830169C18 gene                                    | <a href="#">9830169C18Rik</a>      | 1.063 | 1.544 | 0.165313 | 0.415472 |
| 5226 | 10549420 | <a href="#">NM_198967</a>           | <a href="#">387314</a>    | transmembrane and tetratrico                                  | <a href="#">Tmtc1</a>              | 1.063 | 0.509 | 0.625856 | 0.829508 |
| 5227 | 10385699 | <a href="#">NM_025346</a>           | <a href="#">66089</a>     | required for meiotic nuclear d                                | <a href="#">Rmnd5b</a>             | 1.063 | 0.822 | 0.437617 | 0.696866 |
| 5228 | 10361682 | <a href="#">NM_026141</a>           | <a href="#">67418</a>     | peptidylprolyl isomerase (cycl                                | <a href="#">Ppil4</a>              | 1.063 | 1.048 | 0.328667 | 0.605027 |
| 5229 | 10572743 | <a href="#">NM_146539</a>           | <a href="#">258532</a>    | olfactory receptor 373                                        | <a href="#">Olfr373</a>            | 1.063 | 0.875 | 0.409689 | 0.674122 |
| 5230 | 10581395 | <a href="#">NM_009195</a>           | <a href="#">20498</a>     | solute carrier family 12, memb                                | <a href="#">Slc12a4</a>            | 1.063 | 1.016 | 0.34243  | 0.616776 |
| 5231 | 10564795 | <a href="#">NM_175640</a>           | <a href="#">103968</a>    | perilipin                                                     | <a href="#">Plin</a>               | 1.063 | 1.37  | 0.211842 | 0.477389 |
| 5232 | 10408975 | <a href="#">NM_010617</a>           | <a href="#">16553</a>     | kinesin family member 13A                                     | <a href="#">Kif13a</a>             | 1.063 | 0.567 | 0.588107 | 0.804902 |
| 5233 | 10402512 |                                     |                           |                                                               |                                    | 1.063 | 1.659 | 0.139856 | 0.378196 |
| 5234 | 10380739 | <a href="#">NM_001081434</a>        | <a href="#">71240</a>     | oxysterol binding protein-like                                | <a href="#">Osbp17</a>             | 1.063 | 1.102 | 0.30594  | 0.582459 |
| 5235 | 10574789 | <a href="#">NM_001081241</a>        | <a href="#">75687</a>     | RIKEN cDNA 2310066E14 gene                                    | <a href="#">2310066E14Rik</a>      | 1.063 | 1.003 | 0.34823  | 0.622132 |
| 5236 | 10544596 | <a href="#">NM_023056</a>           | <a href="#">65963</a>     | transmembrane protein 176B                                    | <a href="#">Tmem176b</a>           | 1.063 | 0.562 | 0.590855 | 0.806403 |
| 5237 | 10547795 | <a href="#">NM_007881</a>           | <a href="#">13498</a>     | atrophin 1                                                    | <a href="#">Atn1</a>               | 1.063 | 0.774 | 0.46341  | 0.717662 |
| 5238 | 10409547 | <a href="#">ENSMUST00000091588</a>  | <a href="#">78111</a>     | RIKEN cDNA 4930451E10 gene                                    | <a href="#">4930451E10Rik</a>      | 1.063 | 0.807 | 0.445483 | 0.703614 |
| 5239 | 10478890 | <a href="#">NM_009883</a>           | <a href="#">12608</a>     | CCAAT/enhancer binding protein                                | <a href="#">Cebpb</a>              | 1.063 | 0.791 | 0.45436  | 0.710796 |
| 5240 | 10367349 | <a href="#">NM_001114097</a>        | <a href="#">68094</a>     | SWI/SNF related, matrix associ                                | <a href="#">Smarcc2</a>            | 1.063 | 0.781 | 0.459883 | 0.714719 |
| 5241 | 10426042 | <a href="#">NM_172611</a>           | <a href="#">223752</a>    | GRAM domain containing 4                                      | <a href="#">Gramd4</a>             | 1.063 | 0.899 | 0.397507 | 0.664302 |
| 5242 | 10547789 | <a href="#">NM_013535</a>           | <a href="#">14790</a>     | gene rich cluster, C10 gene                                   | <a href="#">Grec10</a>             | 1.063 | 0.503 | 0.629794 | 0.831325 |
| 5243 | 10580139 | <a href="#">NM_172503</a>           | <a href="#">212168</a>    | zinc finger, SWIM domain conta                                | <a href="#">Zswim4</a>             | 1.063 | 0.773 | 0.464029 | 0.717953 |
| 5244 | 10537909 |                                     |                           |                                                               |                                    | 1.063 | 0.788 | 0.455987 | 0.712382 |
| 5245 | 10601091 | <a href="#">NM_018789</a>           | <a href="#">54601</a>     | forkhead box O4                                               | <a href="#">Foxo4</a>              | 1.063 | 1.273 | 0.242635 | 0.515498 |
| 5246 | 10356512 | <a href="#">ENSMUST000000113094</a> | <a href="#">74918</a>     | IQ motif containing with AAA d                                | <a href="#">Iqca</a>               | 1.063 | 1.287 | 0.237878 | 0.510297 |
| 5247 | 10402783 | <a href="#">NM_001033476</a>        | <a href="#">382643</a>    | AHNAK nucleoprotein 2                                         | <a href="#">Ahnak2</a>             | 1.063 | 0.566 | 0.588685 | 0.805172 |
| 5248 | 10603109 | <a href="#">NM_011081</a>           | <a href="#">18700</a>     | phosphatidylinositol glycan an                                | <a href="#">Piga</a>               | 1.063 | 0.801 | 0.448522 | 0.706139 |
| 5249 | 10409790 | <a href="#">NM_177711</a>           | <a href="#">238663</a>    | RIKEN cDNA 4932411G14 gene                                    | <a href="#">4932411G14Rik</a>      | 1.063 | 1.503 | 0.175224 | 0.428429 |
| 5250 | 10407570 | <a href="#">NM_144516</a>           | <a href="#">66505</a>     | zinc finger, MYND domain conta                                | <a href="#">Zmynd11</a>            | 1.063 | 1.017 | 0.341985 | 0.616342 |
| 5251 | 10379436 | <a href="#">NM_139228</a>           | <a href="#">246104</a>    | rhomboïd, veinlet-like 3 (Dros                                | <a href="#">Rhbd13</a>             | 1.063 | 0.965 | 0.365772 | 0.636847 |
| 5252 | 10562685 |                                     |                           |                                                               |                                    | 1.063 | 0.37  | 0.721714 | 0.878906 |
| 5253 | 10491279 | <a href="#">NM_008857</a>           | <a href="#">18759</a>     | protein kinase C, iota                                        | <a href="#">Prkci</a>              | 1.063 | 0.586 | 0.575547 | 0.797076 |

|      |          |                                    |                           |                                   |                                    |       |        |          |          |
|------|----------|------------------------------------|---------------------------|-----------------------------------|------------------------------------|-------|--------|----------|----------|
| 5254 | 10468789 | <a href="#">NM_001033222</a>       | <a href="#">107368</a>    | PDZ domain containing 8           | <a href="#">Pdzd8</a>              | 1.063 | 0.477  | 0.647606 | 0.841402 |
| 5255 | 10597900 | <a href="#">NM_173364</a>          | <a href="#">235682</a>    | zinc finger protein 445           | <a href="#">Zfp445</a>             | 1.063 | 1.179  | 0.276013 | 0.550828 |
| 5256 | 10537353 | <a href="#">NM_153600</a>          | <a href="#">264134</a>    | tetratricopeptide repeat domai    | <a href="#">Ttc26</a>              | 1.063 | 0.506  | 0.628038 | 0.830847 |
| 5257 | 10354883 | <a href="#">NM_175370</a>          | <a href="#">108812</a>    | amyotrophic lateral sclerosis     | <a href="#">Als2cr12</a>           | 1.063 | 0.851  | 0.422284 | 0.684511 |
| 5258 | 10592355 | <a href="#">NM_172454</a>          | <a href="#">208098</a>    | pannexin 3                        | <a href="#">Panx3</a>              | 1.062 | 0.433  | 0.677386 | 0.856571 |
| 5259 | 10447569 | <a href="#">NM_001111017</a>       | <a href="#">321007</a>    | serine active site containing     | <a href="#">Serac1</a>             | 1.062 | 0.568  | 0.587545 | 0.804342 |
| 5260 | 10606263 | <a href="#">NM_009530</a>          | <a href="#">22589</a>     | alpha thalassemia/mental retar    | <a href="#">Atrx</a>               | 1.062 | 1.164  | 0.281647 | 0.556928 |
| 5261 | 10561478 | <a href="#">NM_001081115</a>       | <a href="#">233038</a>    | RIKEN cDNA 1190020J12 gene        | <a href="#">1190020J12Rik</a>      | 1.062 | 1.19   | 0.271721 | 0.546284 |
| 5262 | 10603598 | <a href="#">NM_011285</a>          | <a href="#">19893</a>     | retinitis pigmentosa GTPase re    | <a href="#">Rpgr</a>               | 1.062 | -0.026 | 0.979615 | 0.991919 |
| 5263 | 10473272 | <a href="#">NM_026934</a>          | <a href="#">69082</a>     | zinc finger CCCH-type containi    | <a href="#">Zc3h15</a>             | 1.062 | 1.126  | 0.296165 | 0.572668 |
| 5264 | 10388971 | <a href="#">NM_144826</a>          | <a href="#">216987</a>    | UTP6, small subunit (SSU) proc    | <a href="#">Utp6</a>               | 1.062 | 0.503  | 0.629676 | 0.831325 |
| 5265 | 10478959 | <a href="#">NM_008561</a>          | <a href="#">17201</a>     | melanocortin 3 receptor           | <a href="#">Mc3r</a>               | 1.062 | 0.814  | 0.441731 | 0.70062  |
| 5266 | 10501485 | <a href="#">NM_178891</a>          | <a href="#">99890</a>     | protein arginine N-methyltrans    | <a href="#">Prmt6</a>              | 1.062 | 0.837  | 0.429488 | 0.690525 |
| 5267 | 10490972 | <a href="#">NM_001081281</a>       | <a href="#">381485</a>    | tripartite motif-containing 55    | <a href="#">Trim55</a>             | 1.062 | 1.488  | 0.179182 | 0.434575 |
| 5268 | 10345904 | <a href="#">BC006931</a>           | <a href="#">98404</a>     | expressed sequence AI597479       | <a href="#">AI597479</a>           | 1.062 | 1.244  | 0.252427 | 0.526583 |
| 5269 | 10411169 | <a href="#">ENSMUST00000059598</a> | <a href="#">328309</a>    | predicted gene,<br>ENSMUSG0000004 | <a href="#">ENSMUSG00000042857</a> | 1.062 | 0.455  | 0.662325 | 0.849718 |
| 5270 | 10370127 | <a href="#">NM_008787</a>          | <a href="#">18541</a>     | pericentrin (kendrin)             | <a href="#">Pent</a>               | 1.062 | 1.017  | 0.342072 | 0.61636  |
| 5271 | 10489261 | <a href="#">NM_182840</a>          | <a href="#">280635</a>    | elastin microfibril interfacier   | <a href="#">Emilin3</a>            | 1.062 | 1.134  | 0.292992 | 0.569029 |
| 5272 | 10483521 | <a href="#">NM_177244</a>          | <a href="#">320720</a>    | FAST kinase domains 1             | <a href="#">Fastkd1</a>            | 1.062 | 0.42   | 0.686537 | 0.861594 |
| 5273 | 10599296 | <a href="#">NM_008955</a>          | <a href="#">19202</a>     | reproductive homeobox 6           | <a href="#">Rhox6</a>              | 1.062 | 0.833  | 0.431464 | 0.692018 |
| 5274 | 10569485 | <a href="#">NM_175649</a>          | <a href="#">244237</a>    | tumor necrosis factor receptor    | <a href="#">Tnfrsf26</a>           | 1.062 | 1.605  | 0.151289 | 0.395197 |
| 5275 | 10447885 | <a href="#">NM_153151</a>          | <a href="#">224530</a>    | acetyl-Coenzyme A acetyltransf    | <a href="#">Acat3</a>              | 1.062 | 1.102  | 0.306042 | 0.582506 |
| 5276 | 10368575 | <a href="#">NM_011509</a>          | <a href="#">100041294</a> | suppressor of Ty 4 homolog 2 (    | <a href="#">Supt4h2</a>            | 1.062 | 0.466  | 0.65511  | 0.845541 |
| 5277 | 10577999 | <a href="#">NM_153135</a>          | <a href="#">210801</a>    | unc-5 homolog D (C. elegans)      | <a href="#">Unc5d</a>              | 1.062 | 1.265  | 0.245084 | 0.518209 |
| 5278 | 10533549 | <a href="#">NM_021505</a>          | <a href="#">59008</a>     | anaphase-promoting complex<br>sub | <a href="#">Anape5</a>             | 1.062 | 0.963  | 0.366696 | 0.637617 |
| 5279 | 10436802 |                                    |                           |                                   |                                    | 1.062 | 0.449  | 0.666923 | 0.851389 |
| 5280 | 10373873 | <a href="#">NM_026175</a>          | <a href="#">67465</a>     | splicing factor 3a, subunit 1     | <a href="#">Sf3a1</a>              | 1.062 | 0.317  | 0.759876 | 0.899364 |
| 5281 | 10560043 | <a href="#">NM_026046</a>          | <a href="#">67230</a>     | zinc finger protein 329           | <a href="#">Zip329</a>             | 1.062 | 1.243  | 0.252695 | 0.526766 |
| 5282 | 10371080 | <a href="#">ENSMUST00000056086</a> | <a href="#">74894</a>     | RIKEN cDNA 4930442H23<br>gene     | <a href="#">4930442H23Rik</a>      | 1.062 | 0.609  | 0.561327 | 0.788461 |
| 5283 | 10415955 |                                    |                           |                                   |                                    | 1.062 | 1.095  | 0.308568 | 0.585197 |
| 5284 | 10474984 | <a href="#">NM_133851</a>          | <a href="#">108907</a>    | nucleolar and spindle associat    | <a href="#">Nusap1</a>             | 1.062 | 0.423  | 0.684758 | 0.860588 |
| 5285 | 10603698 | <a href="#">ENSMUST00000050846</a> | <a href="#">260300</a>    | gene model 1549, (NCBI)           | <a href="#">Gm1549</a>             | 1.062 | 1.205  | 0.26643  | 0.541205 |
| 5286 | 10487252 | <a href="#">NM_207669</a>          | <a href="#">14391</a>     | GA repeat binding protein, bet    | <a href="#">Gabpb1</a>             | 1.062 | 1.074  | 0.317503 | 0.594727 |
| 5287 | 10481920 | <a href="#">NM_080554</a>          | <a href="#">66998</a>     | proteasome (prosome, macropain    | <a href="#">Psmc5</a>              | 1.062 | 0.084  | 0.935028 | 0.974191 |
| 5288 | 10462504 | <a href="#">NM_010799</a>          | <a href="#">17330</a>     | multiple inositol polyphosphat    | <a href="#">Minpp1</a>             | 1.062 | 0.591  | 0.572349 | 0.796254 |
| 5289 | 10389451 | <a href="#">NM_001080931</a>       | <a href="#">327987</a>    | mediator complex subunit 13       | <a href="#">Med13</a>              | 1.062 | 1.062  | 0.322625 | 0.599294 |
| 5290 | 10598482 | <a href="#">NM_011591</a>          | <a href="#">21855</a>     | translocase of inner mitochond    | <a href="#">Timm17b</a>            | 1.062 | 0.079  | 0.939005 | 0.976218 |
| 5291 | 10367611 | <a href="#">ENSMUST00000019901</a> | <a href="#">237250</a>    | gene model 221, (NCBI)            | <a href="#">Gm221</a>              | 1.062 | 1.387  | 0.206912 | 0.471397 |
| 5292 | 10444394 | <a href="#">NM_017463</a>          | <a href="#">18515</a>     | pre B-cell leukemia transcript    | <a href="#">Pbx2</a>               | 1.061 | 0.755  | 0.473932 | 0.725516 |
| 5293 | 10596533 | <a href="#">NM_011573</a>          | <a href="#">21767</a>     | testis expressed gene 264         | <a href="#">Tex264</a>             | 1.061 | 0.862  | 0.416372 | 0.67936  |
| 5294 | 10596671 | <a href="#">ENSMUST00000066239</a> | <a href="#">100038755</a> | predicted gene,<br>ENSMUSG0000005 | <a href="#">ENSMUSG00000053666</a> | 1.061 | 0.435  | 0.67626  | 0.855911 |
| 5295 | 10553015 | <a href="#">NM_009737</a>          | <a href="#">12036</a>     | branched chain aminotransferas    | <a href="#">Bcat2</a>              | 1.061 | 0.913  | 0.390528 | 0.659056 |
| 5296 | 10603440 | <a href="#">NM_009515</a>          | <a href="#">22376</a>     | Wiskott-Aldrich syndrome<br>homol | <a href="#">Was</a>                | 1.061 | 1.459  | 0.186719 | 0.444956 |
| 5297 | 10579703 | <a href="#">NM_138585</a>          | <a href="#">27967</a>     | calcium homeostasis endoplasmic   | <a href="#">Cherp</a>              | 1.061 | 0.764  | 0.469166 | 0.721405 |
| 5298 | 10554076 | <a href="#">NM_175215</a>          | <a href="#">75099</a>     | LysM, putative peptidoglycan-b    | <a href="#">Lysmd4</a>             | 1.061 | 0.914  | 0.390334 | 0.658911 |
| 5299 | 10420811 | <a href="#">NM_026322</a>          | <a href="#">110265</a>    | methionine sulfoxide reductase    | <a href="#">Msra</a>               | 1.061 | 0.771  | 0.46505  | 0.718788 |
| 5300 | 10419557 | <a href="#">NM_001011877</a>       | <a href="#">497113</a>    | ribonuclease, RNase A family,     | <a href="#">Rnase11</a>            | 1.061 | 1.316  | 0.228316 | 0.499328 |
| 5301 | 10547769 | <a href="#">NM_013545</a>          | <a href="#">15170</a>     | protein tyrosine phosphatase,     | <a href="#">Ptpn6</a>              | 1.061 | 0.987  | 0.355662 | 0.628248 |
| 5302 | 10385118 | <a href="#">NM_033374</a>          | <a href="#">94176</a>     | dedicator of cyto-kinesis 2       | <a href="#">Dock2</a>              | 1.061 | 0.669  | 0.524384 | 0.760916 |
| 5303 | 10376832 | <a href="#">NM_007413</a>          | <a href="#">11541</a>     | adenosine A2b receptor            | <a href="#">Adora2b</a>            | 1.061 | 0.724  | 0.49197  | 0.738272 |
| 5304 | 10416266 | <a href="#">AK046652</a>           | <a href="#">73289</a>     | RIKEN cDNA 1700031C06<br>gene     | <a href="#">1700031C06Rik</a>      | 1.061 | 0.67   | 0.523603 | 0.76025  |

|      |          |                                    |                           |                                   |                                    |       |       |          |          |
|------|----------|------------------------------------|---------------------------|-----------------------------------|------------------------------------|-------|-------|----------|----------|
| 5305 | 10374378 | <a href="#">BC024400</a>           | <a href="#">73873</a>     | RIKEN CDNA 4930430E16 gene        | <a href="#">4930430E16K1K</a>      | 1.061 | 0.596 | 0.703307 | 0.809830 |
| 5306 | 10486522 | <a href="#">NM_011743</a>          | <a href="#">20402</a>     | zinc finger protein 106           | <a href="#">Zfp106</a>             | 1.061 | 1.018 | 0.341703 | 0.616255 |
| 5307 | 10453887 | <a href="#">NM_022021</a>          | <a href="#">63955</a>     | Cdk5 and Abl enzyme substrate     | <a href="#">Cables1</a>            | 1.061 | 0.393 | 0.706027 | 0.871814 |
| 5308 | 10360720 | <a href="#">NM_145514</a>          | <a href="#">226757</a>    | WD repeat domain 26               | <a href="#">Wdr26</a>              | 1.061 | 0.829 | 0.433509 | 0.694014 |
| 5309 | 10414315 | <a href="#">BC049694</a>           | <a href="#">72391</a>     | cyclin-dependent kinase inhibi    | <a href="#">Cdkn3</a>              | 1.061 | 0.727 | 0.490259 | 0.737262 |
| 5310 | 10545515 | <a href="#">ENSMUST00000114040</a> | <a href="#">330355</a>    | dynein, axonemal, heavy chain     | <a href="#">Dnahc6</a>             | 1.061 | 0.678 | 0.518911 | 0.757293 |
| 5311 | 10390798 | <a href="#">NM_133730</a>          | <a href="#">70810</a>     | keratin 25                        | <a href="#">Krt25</a>              | 1.061 | 0.539 | 0.605958 | 0.81624  |
| 5312 | 10572989 | <a href="#">NM_029736</a>          | <a href="#">76775</a>     | solute carrier family 10 (sodi    | <a href="#">Slc10a7</a>            | 1.061 | 0.203 | 0.84489  | 0.937    |
| 5313 | 10493794 | <a href="#">NM_025393</a>          | <a href="#">66166</a>     | S100 calcium binding protein A    | <a href="#">S100a14</a>            | 1.061 | 0.887 | 0.403436 | 0.668494 |
| 5314 | 10607085 | <a href="#">NM_021487</a>          | <a href="#">66240</a>     | potassium voltage-gated channe    | <a href="#">Kcne11</a>             | 1.061 | 0.397 | 0.703056 | 0.86973  |
| 5315 | 10518428 | <a href="#">NM_011929</a>          | <a href="#">26372</a>     | chloride channel 6                | <a href="#">Clcn6</a>              | 1.061 | 0.939 | 0.37787  | 0.647641 |
| 5316 | 10604508 | <a href="#">ENSMUST00000060650</a> | <a href="#">385354</a>    | FERM domain containing 7          | <a href="#">Frmf7</a>              | 1.061 | 0.995 | 0.351909 | 0.62505  |
| 5317 | 10560964 | <a href="#">NM_011138</a>          | <a href="#">18987</a>     | POU domain, class 2, transcrip    | <a href="#">Pou2f2</a>             | 1.061 | 1.024 | 0.338857 | 0.614476 |
| 5318 | 10475019 | <a href="#">NM_146125</a>          | <a href="#">228550</a>    | inositol 1,4,5-trisphosphate 3    | <a href="#">Itpka</a>              | 1.061 | 0.494 | 0.635961 | 0.834683 |
| 5319 | 10460118 | <a href="#">NM_018821</a>          | <a href="#">54607</a>     | suppressor of cytokine signali    | <a href="#">Socs6</a>              | 1.061 | 0.245 | 0.813545 | 0.925035 |
| 5320 | 10373113 | <a href="#">NM_008447</a>          | <a href="#">16572</a>     | kinesin family member 5A          | <a href="#">Kif5a</a>              | 1.061 | 1.274 | 0.242066 | 0.514861 |
| 5321 | 10599696 | <a href="#">NM_172779</a>          | <a href="#">236790</a>    | DEAD/H (Asp-Glu-Ala-Asp/His) b    | <a href="#">Ddx26b</a>             | 1.061 | 0.495 | 0.635234 | 0.834289 |
| 5322 | 10573419 | <a href="#">NM_008535</a>          | <a href="#">17095</a>     | lymphoblastomic leukemia          | <a href="#">Lyl1</a>               | 1.061 | 1.631 | 0.145748 | 0.38722  |
| 5323 | 10416653 | <a href="#">NM_001024135</a>       | <a href="#">211255</a>    | kelch repeat and BTB (POZ) dom    | <a href="#">Kbtbd7</a>             | 1.061 | 0.1   | 0.922844 | 0.969148 |
| 5324 | 10545077 |                                    |                           |                                   |                                    | 1.061 | 1.412 | 0.199719 | 0.461464 |
| 5325 | 10413752 | <a href="#">NM_027088</a>          | <a href="#">104416</a>    | Bracl associated protein 1        | <a href="#">Bap1</a>               | 1.061 | 0.594 | 0.570359 | 0.794811 |
| 5326 | 10587748 | <a href="#">NM_001003911</a>       | <a href="#">108153</a>    | a disintegrin-like and metallo    | <a href="#">Adamts7</a>            | 1.061 | 1.411 | 0.19985  | 0.461578 |
| 5327 | 10480284 | <a href="#">ENSMUST00000095134</a> | <a href="#">74103</a>     | nebulin                           | <a href="#">Neb1</a>               | 1.061 | 0.918 | 0.388364 | 0.65703  |
| 5328 | 10498415 | <a href="#">NM_028136</a>          | <a href="#">72162</a>     | DEAH (Asp-Glu-Ala-His) box pol    | <a href="#">Dhx36</a>              | 1.061 | 0.911 | 0.391803 | 0.660136 |
| 5329 | 10377704 | <a href="#">NM_007888</a>          | <a href="#">13543</a>     | dishevelled 2, dsh homolog (Dr    | <a href="#">Dvl2</a>               | 1.061 | 0.938 | 0.378573 | 0.648305 |
| 5330 | 10372121 | <a href="#">NM_001033332</a>       | <a href="#">237500</a>    | transmembrane and tetratricope    | <a href="#">Tmtc3</a>              | 1.061 | 0.614 | 0.558191 | 0.786038 |
| 5331 | 10417070 | <a href="#">NM_023579</a>          | <a href="#">70572</a>     | importin 5                        | <a href="#">Ipo5</a>               | 1.061 | 0.579 | 0.58035  | 0.799512 |
| 5332 | 10460285 | <a href="#">NM_025529</a>          | <a href="#">66387</a>     | nudix (nucleoside diphosphate     | <a href="#">Nudt8</a>              | 1.061 | 0.607 | 0.562717 | 0.789779 |
| 5333 | 10599837 | <a href="#">XM_993146</a>          | <a href="#">279618</a>    | gene model 715, (NCBI)            | <a href="#">Gm715</a>              | 1.061 | 1.39  | 0.205977 | 0.470017 |
| 5334 | 10577528 | <a href="#">BC048089</a>           | <a href="#">102032</a>    | expressed sequence AI316807       | <a href="#">AI316807</a>           | 1.061 | 0.498 | 0.633451 | 0.833323 |
| 5335 | 10346876 |                                    |                           |                                   |                                    | 1.061 | 0.824 | 0.436228 | 0.696174 |
| 5336 | 10356712 | <a href="#">NM_008440</a>          | <a href="#">16560</a>     | kinesin family member 1A          | <a href="#">Kif1a</a>              | 1.061 | 1.15  | 0.286797 | 0.562475 |
| 5337 | 10575548 |                                    |                           |                                   |                                    | 1.06  | 1.285 | 0.238432 | 0.511045 |
| 5338 | 10591369 | <a href="#">NM_010066</a>          | <a href="#">13433</a>     | DNA methyltransferase (cytosin    | <a href="#">Dnmt1</a>              | 1.06  | 1.018 | 0.341573 | 0.616178 |
| 5339 | 10605303 | <a href="#">NM_027109</a>          | <a href="#">69537</a>     | deoxyribonuclease 1-like 1        | <a href="#">Dnase111</a>           | 1.06  | 0.434 | 0.676871 | 0.856377 |
| 5340 | 10363512 | <a href="#">NM_009120</a>          | <a href="#">20224</a>     | SAR1 gene homolog A (S. cerevi    | <a href="#">Sar1a</a>              | 1.06  | 0.702 | 0.504731 | 0.747027 |
| 5341 | 10369481 | <a href="#">NM_207000</a>          | <a href="#">404634</a>    | H2A histone family, member Y2     | <a href="#">H2afy2</a>             | 1.06  | 0.663 | 0.528077 | 0.763475 |
| 5342 | 10485314 | <a href="#">NM_183106</a>          | <a href="#">74569</a>     | tetratricopeptide repeat domai    | <a href="#">Ttc17</a>              | 1.06  | 1.09  | 0.310639 | 0.587176 |
| 5343 | 10349174 | <a href="#">NM_011459</a>          | <a href="#">20725</a>     | serine (or cysteine) peptidase    | <a href="#">Serpinc8</a>           | 1.06  | 0.925 | 0.384825 | 0.65414  |
| 5344 | 10572870 | <a href="#">NM_178017</a>          | <a href="#">70823</a>     | high mobility group box 2-like    | <a href="#">Hmgb2l1</a>            | 1.06  | 0.771 | 0.464944 | 0.718729 |
| 5345 | 10497463 | <a href="#">NM_029706</a>          | <a href="#">76703</a>     | carboxypeptidase B1 (tissue)      | <a href="#">Cpb1</a>               | 1.06  | 0.833 | 0.431724 | 0.692222 |
| 5346 | 10449280 | <a href="#">ENSMUST00000116632</a> | <a href="#">383229</a>    | predicted gene, EG383229          | <a href="#">EG383229</a>           | 1.06  | 0.662 | 0.528316 | 0.763705 |
| 5347 | 10374415 | <a href="#">NM_024459</a>          | <a href="#">19058</a>     | protein phosphatase 3, regulat    | <a href="#">Ppp3r1</a>             | 1.06  | 0.669 | 0.524314 | 0.760916 |
| 5348 | 10406399 | <a href="#">AK076753</a>           | <a href="#">75507</a>     | POU domain class 5, transcript    | <a href="#">Pou5f2</a>             | 1.06  | 1.283 | 0.239041 | 0.511774 |
| 5349 | 10399540 | <a href="#">NM_172574</a>          | <a href="#">217430</a>    | PQ loop repeat containing         | <a href="#">Pqlc3</a>              | 1.06  | 0.386 | 0.710377 | 0.873031 |
| 5350 | 10464819 | <a href="#">NM_019869</a>          | <a href="#">56275</a>     | RNA binding motif protein 14      | <a href="#">Rbm14</a>              | 1.06  | 0.808 | 0.4447   | 0.703166 |
| 5351 | 10510239 | <a href="#">ENSMUST00000104964</a> | <a href="#">100038537</a> | predicted gene,<br>ENSMUSG0000007 | <a href="#">ENSMUSG00000070585</a> | 1.06  | 1.805 | 0.112846 | 0.332847 |
| 5352 | 10433352 | <a href="#">NM_026666</a>          | <a href="#">170644</a>    | ubiquitin 1                       | <a href="#">Ubn1</a>               | 1.06  | 0.426 | 0.682435 | 0.859763 |
| 5353 | 10443438 | <a href="#">NM_001034885</a>       | <a href="#">433091</a>    | patatin-like phospholipase dom    | <a href="#">Pnpla1</a>             | 1.06  | 1.065 | 0.321179 | 0.598048 |
| 5354 | 10512011 | <a href="#">NM_013889</a>          | <a href="#">30046</a>     | zinc finger protein 292           | <a href="#">Zfp292</a>             | 1.06  | 0.857 | 0.418841 | 0.681435 |
| 5355 | 10455989 | <a href="#">NM_025776</a>          | <a href="#">66810</a>     | RNA binding motif protein 22      | <a href="#">Rbm22</a>              | 1.06  | 0.529 | 0.612817 | 0.820505 |
| 5356 | 10511661 | <a href="#">NM_152812</a>          | <a href="#">72201</a>     | OTU domain containing 6B          | <a href="#">Otud6b</a>             | 1.06  | 0.39  | 0.708014 | 0.872288 |
| 5357 | 10378154 | <a href="#">NM_001045536</a>       | <a href="#">195018</a>    | zinc finger, ZZ-type with EF h    | <a href="#">Zzef1</a>              | 1.06  | 0.805 | 0.446379 | 0.704083 |

|      |          |                                    |                           |                                |                                    |       |        |          |          |
|------|----------|------------------------------------|---------------------------|--------------------------------|------------------------------------|-------|--------|----------|----------|
| 5358 | 10388732 | <a href="#">AK053376</a>           | <a href="#">109224</a>    | RIKEN cDNA A030003K02 gene     | <a href="#">A030003K02Rik</a>      | 1.06  | 0.886  | 0.404157 | 0.668818 |
| 5359 | 10520782 | <a href="#">NM_172993</a>          | <a href="#">269639</a>    | zinc finger protein 512        | <a href="#">Zfp512</a>             | 1.06  | 0.333  | 0.748747 | 0.893678 |
| 5360 | 10598093 | <a href="#">NM_177363</a>          | <a href="#">245126</a>    | RIKEN cDNA 9930022N03 gene     | <a href="#">9930022N03Rik</a>      | 1.06  | 1.368  | 0.212466 | 0.477963 |
| 5361 | 10560903 | <a href="#">NM_182785</a>          | <a href="#">232973</a>    | Ly6/Plaur domain containing 4  | <a href="#">Lypd4</a>              | 1.06  | 1.156  | 0.28454  | 0.559679 |
| 5362 | 10434124 | <a href="#">NM_009436</a>          | <a href="#">22115</a>     | testis-specific serine kinase  | <a href="#">Tsk2</a>               | 1.06  | 0.51   | 0.625561 | 0.829323 |
| 5363 | 10398117 | <a href="#">NM_009747</a>          | <a href="#">12062</a>     | bradykinin receptor, beta 2    | <a href="#">Bdkrb2</a>             | 1.06  | 0.988  | 0.354956 | 0.627681 |
| 5364 | 10406590 | <a href="#">NM_175455</a>          | <a href="#">218440</a>    | ankyrin repeat domain 34B      | <a href="#">Ankrd34b</a>           | 1.06  | 1.178  | 0.276164 | 0.551025 |
| 5365 | 10570373 | <a href="#">NM_009361</a>          | <a href="#">21781</a>     | transcription factor Dp 1      | <a href="#">Tfdp1</a>              | 1.06  | 0.647  | 0.537607 | 0.770707 |
| 5366 | 10408950 |                                    |                           |                                |                                    | 1.06  | 0.445  | 0.669279 | 0.852817 |
| 5367 | 10598101 | <a href="#">BC053388</a>           | <a href="#">270118</a>    | mastermind like 2 (Drosophila) | <a href="#">Maml2</a>              | 1.06  | 1.086  | 0.312282 | 0.588598 |
| 5368 | 10408200 | <a href="#">NM_175655</a>          | <a href="#">319157</a>    | histone cluster 1, H4f         | <a href="#">Hist1h4f</a>           | 1.06  | 0.124  | 0.905009 | 0.963132 |
| 5369 | 10378214 |                                    |                           |                                |                                    | 1.06  | 0.481  | 0.644591 | 0.839238 |
| 5370 | 10516658 | <a href="#">NM_025455</a>          | <a href="#">66264</a>     | coiled coil domain containing  | <a href="#">Ccdc28b</a>            | 1.06  | 0.322  | 0.756282 | 0.897871 |
| 5371 | 10475245 | <a href="#">AK006022</a>           | <a href="#">99260</a>     | expressed sequence AV039307    | <a href="#">AV039307</a>           | 1.06  | 0.488  | 0.640142 | 0.836894 |
| 5372 | 10508711 | <a href="#">NM_025579</a>          | <a href="#">66464</a>     | TAF12 RNA polymerase II, TATA  | <a href="#">Taf12</a>              | 1.06  | 0.105  | 0.918886 | 0.967815 |
| 5373 | 10555186 | <a href="#">NM_009519</a>          | <a href="#">22411</a>     | wingless-related MMTV integrat | <a href="#">Wnt11</a>              | 1.06  | 1.665  | 0.138578 | 0.376638 |
| 5374 | 10352048 | <a href="#">NM_012012</a>          | <a href="#">26909</a>     | exonuclease 1                  | <a href="#">Exo1</a>               | 1.06  | 0.508  | 0.626839 | 0.83034  |
| 5375 | 10526049 | <a href="#">NM_025450</a>          | <a href="#">66258</a>     | mitochondrial ribosomal protei | <a href="#">Mrps17</a>             | 1.06  | 0.398  | 0.702078 | 0.869258 |
| 5376 | 10539156 | <a href="#">ENSMUST00000101278</a> | <a href="#">100038714</a> | predicted gene, OTTMUSG0000002 | <a href="#">OTTMUSG00000021199</a> | 1.06  | 1.19   | 0.27165  | 0.546245 |
| 5377 | 10384770 | <a href="#">ENSMUST00000109511</a> | <a href="#">70626</a>     | RIKEN cDNA 5730522E02 gene     | <a href="#">5730522E02Rik</a>      | 1.06  | 0.734  | 0.485963 | 0.734018 |
| 5378 | 10560880 | <a href="#">BC037749</a>           | <a href="#">210155</a>    | predicted gene, EG210155       | <a href="#">EG210155</a>           | 1.059 | 0.579  | 0.580461 | 0.799564 |
| 5379 | 10361031 | <a href="#">NM_178775</a>          | <a href="#">320119</a>    | ribosomal protein S6 kinase po | <a href="#">Rps6kc1</a>            | 1.059 | 0.474  | 0.649614 | 0.842717 |
| 5380 | 10582008 | <a href="#">NM_026844</a>          | <a href="#">66531</a>     | RIKEN cDNA 2310061C15 gene     | <a href="#">2310061C15Rik</a>      | 1.059 | 0.435  | 0.676134 | 0.855911 |
| 5381 | 10406407 | <a href="#">NM_001042591</a>       | <a href="#">105171</a>    | arrestin domain containing 3   | <a href="#">Arrdc3</a>             | 1.059 | 0.345  | 0.740249 | 0.889357 |
| 5382 | 10518714 | <a href="#">NM_177672</a>          | <a href="#">230917</a>    | transmembrane protein 201      | <a href="#">Tmem201</a>            | 1.059 | 1.546  | 0.164703 | 0.414577 |
| 5383 | 10515832 | <a href="#">NM_001011870</a>       | <a href="#">258214</a>    | olfactory receptor 1329        | <a href="#">Olfr1329</a>           | 1.059 | 0.379  | 0.715638 | 0.875402 |
| 5384 | 10511113 | <a href="#">NM_007661</a>          | <a href="#">12537</a>     | cell division cycle 2-like 1   | <a href="#">Cdc21l</a>             | 1.059 | 0.935  | 0.380004 | 0.6497   |
| 5385 | 10458081 |                                    |                           |                                |                                    | 1.059 | 0.276  | 0.790237 | 0.914539 |
| 5386 | 10478774 |                                    |                           |                                |                                    | 1.059 | 1.209  | 0.264757 | 0.539986 |
| 5387 | 10431410 | <a href="#">NM_011161</a>          | <a href="#">19094</a>     | mitogen-activated protein kina | <a href="#">Mapk11</a>             | 1.059 | 0.993  | 0.353065 | 0.625939 |
| 5388 | 10350099 | <a href="#">ENSMUST00000097567</a> | <a href="#">100038590</a> | predicted gene, ENSMUSG0000007 | <a href="#">ENSMUSG00000073556</a> | 1.059 | 1.29   | 0.236876 | 0.508993 |
| 5389 | 10582330 | <a href="#">NM_001033142</a>       | <a href="#">68718</a>     | ring finger protein 166        | <a href="#">Rnf166</a>             | 1.059 | 1.016  | 0.34241  | 0.616776 |
| 5390 | 10479041 | <a href="#">NM_019547</a>          | <a href="#">56190</a>     | RNA binding motif protein 38   | <a href="#">Rbm38</a>              | 1.059 | 0.537  | 0.607371 | 0.817197 |
| 5391 | 10539931 | <a href="#">ENSMUST00000101176</a> | <a href="#">434065</a>    | gene model 1965, (NCBI)        | <a href="#">Gm1965</a>             | 1.059 | 0.964  | 0.366457 | 0.637434 |
| 5392 | 10555570 | <a href="#">NM_008887</a>          | <a href="#">11859</a>     | paired-like homeobox 2a        | <a href="#">Phox2a</a>             | 1.059 | 0.214  | 0.836691 | 0.934075 |
| 5393 | 10529285 | <a href="#">ENSMUST00000030994</a> | <a href="#">20232</a>     | NK1 transcription factor relat | <a href="#">Nkx1-1</a>             | 1.059 | 1.055  | 0.325622 | 0.601936 |
| 5394 | 10484813 | <a href="#">NM_146972</a>          | <a href="#">258974</a>    | olfactory receptor 1233        | <a href="#">Olfr1233</a>           | 1.059 | 1.112  | 0.301715 | 0.577901 |
| 5395 | 10513776 | <a href="#">NM_207109</a>          | <a href="#">56079</a>     | astrotactin 2                  | <a href="#">Astrn2</a>             | 1.059 | 0.523  | 0.616983 | 0.823029 |
| 5396 | 10499454 | <a href="#">NM_022994</a>          | <a href="#">65111</a>     | death associated protein 3     | <a href="#">Dap3</a>               | 1.059 | 0.287  | 0.78207  | 0.911385 |
| 5397 | 10506594 | <a href="#">BC024426</a>           | <a href="#">230579</a>    | cDNA sequence BC026682         | <a href="#">BC026682</a>           | 1.059 | 0.88   | 0.407234 | 0.671681 |
| 5398 | 10356489 | <a href="#">NM_139152</a>          | <a href="#">208372</a>    | ankyrin repeat and SOCS box-co | <a href="#">Asb18</a>              | 1.059 | 0.898  | 0.398193 | 0.664555 |
| 5399 | 10407337 | <a href="#">NM_010408</a>          | <a href="#">15165</a>     | hyperpolarization-activated, c | <a href="#">Hen1</a>               | 1.059 | -0.393 | 0.705551 | 0.871592 |
| 5400 | 10507692 | <a href="#">NM_007902</a>          | <a href="#">13615</a>     | endothelin 2                   | <a href="#">Edn2</a>               | 1.059 | 0.5    | 0.632256 | 0.832782 |
| 5401 | 10436451 | <a href="#">NM_026588</a>          | <a href="#">68159</a>     | syntaxin 19                    | <a href="#">Stx19</a>              | 1.059 | 1.068  | 0.32005  | 0.596822 |
| 5402 | 10421981 | <a href="#">NM_028315</a>          | <a href="#">72662</a>     | DIS3 mitotic control homolog ( | <a href="#">Dis3</a>               | 1.059 | 0.461  | 0.658153 | 0.847091 |
| 5403 | 10430536 | <a href="#">NM_199080</a>          | <a href="#">67040</a>     | DEAD (Asp-Glu-Ala-Asp) box pol | <a href="#">Ddx17</a>              | 1.059 | 0.823  | 0.436647 | 0.696302 |
| 5404 | 10408519 | <a href="#">NM_153072</a>          | <a href="#">210554</a>    | Hus1 homolog b (S. pombe)      | <a href="#">Hus1b</a>              | 1.059 | 1.071  | 0.318874 | 0.596082 |
| 5405 | 10607169 | <a href="#">NM_009428</a>          | <a href="#">22067</a>     | transient receptor potential c | <a href="#">Trpc5</a>              | 1.059 | 0.453  | 0.663662 | 0.850267 |
| 5406 | 10561868 | <a href="#">BC054747</a>           | <a href="#">233064</a>    | WD repeat domain 62            | <a href="#">Wdr62</a>              | 1.059 | 1.129  | 0.294868 | 0.571152 |
| 5407 | 10553131 | <a href="#">NM_133950</a>          | <a href="#">68137</a>     | KDEL (Lys-Asp-Glu-Leu) endopla | <a href="#">Kdelr1</a>             | 1.059 | 0.233  | 0.821896 | 0.92863  |
| 5408 | 10507484 | <a href="#">NM_080469</a>          | <a href="#">140546</a>    | prion protein interacting prot | <a href="#">Prnpip1</a>            | 1.059 | 0.567  | 0.587709 | 0.804514 |

|      |          |                                    |                           |                                 |                               |       |        |          |          |
|------|----------|------------------------------------|---------------------------|---------------------------------|-------------------------------|-------|--------|----------|----------|
| 5409 | 10607724 | <a href="#">NM_178794</a>          | <a href="#">22184</a>     | zinc finger (CCCH type), RNA b  | <a href="#">Zrsr2</a>         | 1.059 | 0.514  | 0.622458 | 0.827231 |
| 5410 | 10406364 | <a href="#">BC089469</a>           | <a href="#">72371</a>     | RIKEN cDNA 2210408I21 gene      | <a href="#">2210408I21Rik</a> | 1.059 | 0.135  | 0.896121 | 0.95935  |
| 5411 | 10550638 | <a href="#">NM_013648</a>          | <a href="#">20167</a>     | reticulon 2 (Z-band associated) | <a href="#">Rtn2</a>          | 1.059 | 0.665  | 0.52681  | 0.76278  |
| 5412 | 10491547 | <a href="#">ENSMUST00000029268</a> | <a href="#">72282</a>     | RIKEN cDNA 1810062G17 gene      | <a href="#">1810062G17Rik</a> | 1.059 | 0.859  | 0.41809  | 0.680624 |
| 5413 | 10580457 | <a href="#">BC004022</a>           | <a href="#">80750</a>     | NEDD4 binding protein 1         | <a href="#">N4bp1</a>         | 1.059 | 0.342  | 0.74229  | 0.890171 |
| 5414 | 10389308 | <a href="#">NM_153144</a>          | <a href="#">217039</a>    | gametogenetin binding protein   | <a href="#">Ggnbp2</a>        | 1.059 | 1.005  | 0.347419 | 0.62155  |
| 5415 | 10360802 |                                    |                           |                                 |                               | 1.059 | 0.909  | 0.392526 | 0.660531 |
| 5416 | 10478145 | <a href="#">NM_153089</a>          | <a href="#">228852</a>    | protein phosphatase 1, regulat  | <a href="#">Ppp1r16b</a>      | 1.059 | 0.667  | 0.525307 | 0.76149  |
| 5417 | 10397555 | <a href="#">XM_990056</a>          | <a href="#">667350</a>    | predicted gene, EG667350        | <a href="#">EG667350</a>      | 1.059 | 0.259  | 0.80313  | 0.920071 |
| 5418 | 10529708 | <a href="#">NM_001081144</a>       | <a href="#">100515</a>    | zinc finger protein 518B        | <a href="#">Zfp518b</a>       | 1.059 | 0.526  | 0.614796 | 0.821749 |
| 5419 | 10382788 | <a href="#">NM_010254</a>          | <a href="#">14428</a>     | galanin receptor 2              | <a href="#">Galr2</a>         | 1.059 | 1.031  | 0.335684 | 0.611239 |
| 5420 | 10566877 | <a href="#">BC067204</a>           | <a href="#">319934</a>    | SET binding factor 2            | <a href="#">Sbf2</a>          | 1.059 | 0.969  | 0.363961 | 0.635368 |
| 5421 | 10375031 | <a href="#">BC028766</a>           | <a href="#">78372</a>     | RIKEN cDNA 3300001G02 gene      | <a href="#">3300001G02Rik</a> | 1.059 | 0.329  | 0.751566 | 0.895256 |
| 5422 | 10566157 | <a href="#">NM_146755</a>          | <a href="#">258750</a>    | olfactory receptor 551          | <a href="#">Olf551</a>        | 1.058 | 0.809  | 0.444454 | 0.702934 |
| 5423 | 10367252 | <a href="#">NM_133992</a>          | <a href="#">103135</a>    | ubiquitin specific peptidase 5  | <a href="#">Usp52</a>         | 1.058 | 0.694  | 0.509216 | 0.750516 |
| 5424 | 10367179 | <a href="#">NM_011589</a>          | <a href="#">21853</a>     | timeless homolog (Drosophila)   | <a href="#">Timeless</a>      | 1.058 | 0.622  | 0.552814 | 0.782578 |
| 5425 | 10551282 | <a href="#">XR_033870</a>          | <a href="#">100047728</a> | similar to Cytochrome P450 2A5  | <a href="#">LOC100047728</a>  | 1.058 | 0.202  | 0.84561  | 0.937284 |
| 5426 | 10553788 | <a href="#">NM_009728</a>          | <a href="#">11982</a>     | ATPase, class V, type 10A       | <a href="#">Atp10a</a>        | 1.058 | 0.119  | 0.908447 | 0.963723 |
| 5427 | 10534056 |                                    |                           |                                 |                               | 1.058 | 0.4    | 0.700604 | 0.86896  |
| 5428 | 10563178 | <a href="#">NM_007645</a>          | <a href="#">12493</a>     | CD37 antigen                    | <a href="#">Cd37</a>          | 1.058 | 1.158  | 0.283623 | 0.558905 |
| 5429 | 10427148 | <a href="#">NM_153194</a>          | <a href="#">68744</a>     | zinc finger protein 740         | <a href="#">Zfp740</a>        | 1.058 | 0.63   | 0.548198 | 0.778657 |
| 5430 | 10428690 | <a href="#">NM_026759</a>          | <a href="#">68537</a>     | mitochondrial ribosomal protei  | <a href="#">Mrpl13</a>        | 1.058 | 0.099  | 0.924041 | 0.969768 |
| 5431 | 10607280 | <a href="#">XR_031183</a>          | <a href="#">100039716</a> | similar to ribosomal protein L  | <a href="#">LOC100039716</a>  | 1.058 | 0.809  | 0.444345 | 0.702815 |
| 5432 | 10421526 | <a href="#">NM_009029</a>          | <a href="#">19645</a>     | retinoblastoma 1                | <a href="#">Rb1</a>           | 1.058 | 0.264  | 0.799418 | 0.919009 |
| 5433 | 10581073 | <a href="#">NM_001013380</a>       | <a href="#">234663</a>    | dynein, cytoplasmic 1 light in  | <a href="#">Dync1li2</a>      | 1.058 | 0.585  | 0.576536 | 0.79748  |
| 5434 | 10347481 | <a href="#">NM_024264</a>          | <a href="#">104086</a>    | cytochrome P450, family 27, su  | <a href="#">Cyp27a1</a>       | 1.058 | 1.243  | 0.252786 | 0.526904 |
| 5435 | 10437668 | <a href="#">NM_009896</a>          | <a href="#">12703</a>     | suppressor of cytokine signali  | <a href="#">Soes1</a>         | 1.058 | 0.815  | 0.441051 | 0.700013 |
| 5436 | 10381708 | <a href="#">NM_019679</a>          | <a href="#">57778</a>     | formin-like 1                   | <a href="#">Fmn1l</a>         | 1.058 | 1.04   | 0.331951 | 0.608173 |
| 5437 | 10420631 | <a href="#">NM_026598</a>          | <a href="#">68177</a>     | emopamil binding protein-like   | <a href="#">Ebpl</a>          | 1.058 | 0.712  | 0.498902 | 0.742429 |
| 5438 | 10482814 | <a href="#">NM_001111030</a>       | <a href="#">269275</a>    | activin A receptor, type IC     | <a href="#">Acvr1c</a>        | 1.058 | 0.457  | 0.66135  | 0.849188 |
| 5439 | 10457487 |                                    |                           |                                 |                               | 1.058 | 0.912  | 0.391324 | 0.659653 |
| 5440 | 10551638 | <a href="#">NM_008496</a>          | <a href="#">16858</a>     | lectin, galactose binding, sol  | <a href="#">Lgals7</a>        | 1.058 | 0.735  | 0.485766 | 0.734004 |
| 5441 | 10538169 | <a href="#">ENSMUST00000031837</a> | <a href="#">69761</a>     | RIKEN cDNA 1600015I10 gene      | <a href="#">1600015I10Rik</a> | 1.058 | 0.705  | 0.502945 | 0.745637 |
| 5442 | 10547701 | <a href="#">NM_008995</a>          | <a href="#">19305</a>     | peroxisome biogenesis factor 5  | <a href="#">Pex5</a>          | 1.058 | 0.67   | 0.523495 | 0.760167 |
| 5443 | 10584231 | <a href="#">NM_023292</a>          | <a href="#">67049</a>     | pseudouridine synthase 3        | <a href="#">Pus3</a>          | 1.058 | 0.58   | 0.579444 | 0.798942 |
| 5444 | 10469335 | <a href="#">NM_011484</a>          | <a href="#">20844</a>     | signal transducing adaptor mol  | <a href="#">Stam</a>          | 1.058 | 0.902  | 0.39619  | 0.663738 |
| 5445 | 10419638 | <a href="#">NM_201637</a>          | <a href="#">67772</a>     | chromodomain helicase DNA bind  | <a href="#">Chd8</a>          | 1.058 | 1.406  | 0.201184 | 0.463431 |
| 5446 | 10487629 | <a href="#">NM_130884</a>          | <a href="#">170718</a>    | isocitrate dehydrogenase 3 (NA  | <a href="#">Idh3b</a>         | 1.058 | 0.845  | 0.425323 | 0.687277 |
| 5447 | 10495243 | <a href="#">NM_010360</a>          | <a href="#">14866</a>     | glutathione S-transferase, mu   | <a href="#">Gstm5</a>         | 1.058 | -0.025 | 0.980874 | 0.991919 |
| 5448 | 10384522 | <a href="#">NM_146243</a>          | <a href="#">66713</a>     | ARP2 actin-related protein 2 h  | <a href="#">Actr2</a>         | 1.058 | 0.985  | 0.356656 | 0.629161 |
| 5449 | 10548875 | <a href="#">NM_026639</a>          | <a href="#">109978</a>    | ADP-ribosyltransferase 4        | <a href="#">Art4</a>          | 1.058 | 0.611  | 0.560105 | 0.787428 |
| 5450 | 10470936 | <a href="#">NM_146252</a>          | <a href="#">70296</a>     | TBC1 domain family, member 13   | <a href="#">Tbc1d13</a>       | 1.058 | 0.691  | 0.510925 | 0.752036 |
| 5451 | 10417920 | <a href="#">NM_030180</a>          | <a href="#">78787</a>     | ubiquitin specific peptidase 5  | <a href="#">Usp54</a>         | 1.058 | 0.512  | 0.623944 | 0.828269 |
| 5452 | 10430596 | <a href="#">NM_194342</a>          | <a href="#">223697</a>    | unc-84 homolog B (C. elegans)   | <a href="#">Unc84b</a>        | 1.058 | 1.668  | 0.138087 | 0.375863 |
| 5453 | 10487945 | <a href="#">NM_028802</a>          | <a href="#">74182</a>     | preimplantation protein 4       | <a href="#">Prei4</a>         | 1.058 | 0.362  | 0.728079 | 0.882032 |
| 5454 | 10450784 | <a href="#">NM_008205</a>          | <a href="#">14997</a>     | histocompatibility 2, M region  | <a href="#">H2-M9</a>         | 1.058 | 0.261  | 0.801098 | 0.919467 |
| 5455 | 10390685 | <a href="#">NM_025661</a>          | <a href="#">66612</a>     | ORM1-like 3 (S. cerevisiae)     | <a href="#">Ormdl3</a>        | 1.058 | 0.936  | 0.379637 | 0.649438 |
| 5456 | 10347888 | <a href="#">NM_016960</a>          | <a href="#">20297</a>     | chemokine (C-C motif) ligand 2  | <a href="#">Ccl20</a>         | 1.058 | 0.8    | 0.449081 | 0.706553 |
| 5457 | 10464647 | <a href="#">NM_178650</a>          | <a href="#">108995</a>    | TBC1 domain family, member 10c  | <a href="#">Tbc1d10c</a>      | 1.058 | 1.801  | 0.113431 | 0.333803 |
| 5458 | 10356137 | <a href="#">NM_025453</a>          | <a href="#">66261</a>     | transmembrane 4 L six family m  | <a href="#">Tm4sf20</a>       | 1.058 | 0.866  | 0.41414  | 0.677439 |
| 5459 | 10425511 | <a href="#">NM_177310</a>          | <a href="#">321003</a>    | X-prolyl aminopeptidase (amino  | <a href="#">Xpnpep3</a>       | 1.058 | 0.582  | 0.578068 | 0.798189 |
| 5460 | 10476945 | <a href="#">NM_009977</a>          | <a href="#">13011</a>     | cystatin F (leukocystatin)      | <a href="#">Cst7</a>          | 1.058 | 0.838  | 0.428735 | 0.689638 |

|      |          |                                    |                        |                                |                               |       |       |          |          |
|------|----------|------------------------------------|------------------------|--------------------------------|-------------------------------|-------|-------|----------|----------|
| 5461 | 10562709 | <a href="#">NM_001111058</a>       | <a href="#">12489</a>  | CD33 antigen                   | <a href="#">Cd33</a>          | 1.058 | 0.977 | 0.360389 | 0.632213 |
| 5462 | 10511694 | <a href="#">NM_145950</a>          | <a href="#">209212</a> | oxidative stress induced growt | <a href="#">Osgin2</a>        | 1.057 | 0.892 | 0.401397 | 0.666762 |
| 5463 | 10561837 | <a href="#">NM_011980</a>          | <a href="#">26465</a>  | zinc finger protein 146        | <a href="#">Zfp146</a>        | 1.057 | 0.183 | 0.860059 | 0.943699 |
| 5464 | 10458262 | <a href="#">NM_011397</a>          | <a href="#">20522</a>  | solute carrier family 23 (nucl | <a href="#">Slc23a1</a>       | 1.057 | 0.878 | 0.408292 | 0.672667 |
| 5465 | 10531453 | <a href="#">NM_177230</a>          | <a href="#">320696</a> | RIKEN cDNA 4932413O14 gene     | <a href="#">4932413O14Rik</a> | 1.057 | 0.741 | 0.481994 | 0.730954 |
| 5466 | 10353135 | <a href="#">NM_008678</a>          | <a href="#">17978</a>  | nuclear receptor coactivator 2 | <a href="#">Ncoa2</a>         | 1.057 | 0.515 | 0.621678 | 0.826662 |
| 5467 | 10408755 | <a href="#">NM_139063</a>          | <a href="#">17828</a>  | muted                          | <a href="#">Muted</a>         | 1.057 | 1.001 | 0.349058 | 0.622715 |
| 5468 | 10606969 | <a href="#">NM_153586</a>          | <a href="#">237073</a> | RNA binding motif protein 41   | <a href="#">Rbm41</a>         | 1.057 | 1.061 | 0.323029 | 0.59983  |
| 5469 | 10483246 |                                    |                        |                                |                               | 1.057 | 0.854 | 0.420456 | 0.682753 |
| 5470 | 10518585 | <a href="#">NM_207682</a>          | <a href="#">16561</a>  | kinesin family member 1B       | <a href="#">Kif1b</a>         | 1.057 | 0.738 | 0.483753 | 0.732322 |
| 5471 | 10504458 | <a href="#">NM_001080385</a>       | <a href="#">12757</a>  | clathrin, light polypeptide (L | <a href="#">Clta</a>          | 1.057 | 1.089 | 0.311107 | 0.587683 |
| 5472 | 10433077 | <a href="#">NM_027885</a>          | <a href="#">71726</a>  | single-strand selective monofu | <a href="#">Smug1</a>         | 1.057 | 1.014 | 0.343409 | 0.617488 |
| 5473 | 10389231 | <a href="#">NM_011337</a>          | <a href="#">20302</a>  | chemokine (C-C motif) ligand 3 | <a href="#">Ccl3</a>          | 1.057 | 1.44  | 0.19171  | 0.451028 |
| 5474 | 10408616 | <a href="#">NM_001033167</a>       | <a href="#">73102</a>  | solute carrier family 22, memb | <a href="#">Slc22a23</a>      | 1.057 | 0.729 | 0.489072 | 0.736349 |
| 5475 | 10391454 | <a href="#">NM_012037</a>          | <a href="#">26949</a>  | vesicle amine transport protei | <a href="#">Vat1</a>          | 1.057 | 0.094 | 0.927396 | 0.971409 |
| 5476 | 10421012 | <a href="#">NM_028032</a>          | <a href="#">71978</a>  | protein phosphatase 2 (formerl | <a href="#">Ppp2r2a</a>       | 1.057 | 1.105 | 0.304749 | 0.581187 |
| 5477 | 10550076 | <a href="#">NM_011588</a>          | <a href="#">21849</a>  | tripartite motif-containing 28 | <a href="#">Trim28</a>        | 1.057 | 0.884 | 0.405243 | 0.669725 |
| 5478 | 10467697 | <a href="#">NM_028152</a>          | <a href="#">72199</a>  | MMS19 (MET18 S. cerevisiae)    | <a href="#">Mms19</a>         | 1.057 | 0.903 | 0.395572 | 0.663394 |
| 5479 | 10558159 | <a href="#">NM_007769</a>          | <a href="#">12945</a>  | deleted in malignant brain tum | <a href="#">Dmbt1</a>         | 1.057 | 0.712 | 0.499127 | 0.742475 |
| 5480 | 10377751 | <a href="#">NM_009714</a>          | <a href="#">11889</a>  | asialoglycoprotein receptor 1  | <a href="#">Asgr1</a>         | 1.057 | 0.72  | 0.493936 | 0.739382 |
| 5481 | 10605421 | <a href="#">NM_001039373</a>       | <a href="#">17763</a>  | mature T-cell proliferation 1  | <a href="#">Mtcp1</a>         | 1.057 | 0.364 | 0.726427 | 0.881516 |
| 5482 | 10607366 | <a href="#">NM_172441</a>          | <a href="#">110380</a> | shroom family member 2         | <a href="#">Shroom2</a>       | 1.057 | 1.28  | 0.240215 | 0.513302 |
| 5483 | 10503584 | <a href="#">NM_172687</a>          | <a href="#">230027</a> | coenzyme Q3 homolog, methyltra | <a href="#">Coq3</a>          | 1.057 | 0.574 | 0.583277 | 0.801352 |
| 5484 | 10408032 | <a href="#">NM_001013786</a>       | <a href="#">432731</a> | zinc finger protein 187        | <a href="#">Zfp187</a>        | 1.057 | 0.296 | 0.775721 | 0.908358 |
| 5485 | 10543895 | <a href="#">BC075651</a>           | <a href="#">243753</a> | RIKEN cDNA 2010107G12 gene     | <a href="#">2010107G12Rik</a> | 1.057 | 1.454 | 0.188101 | 0.446224 |
| 5486 | 10348829 | <a href="#">NM_145519</a>          | <a href="#">227377</a> | FERM, RhoGEF and pleckstrin do | <a href="#">Farp2</a>         | 1.057 | 0.541 | 0.605053 | 0.815765 |
| 5487 | 10353733 | <a href="#">NM_008922</a>          | <a href="#">19076</a>  | DNA primase, p58 subunit       | <a href="#">Prim2</a>         | 1.057 | 0.086 | 0.93363  | 0.973502 |
| 5488 | 10549546 | <a href="#">NM_025348</a>          | <a href="#">66091</a>  | NADH dehydrogenase (ubiquinone | <a href="#">Ndufa3</a>        | 1.057 | 0.226 | 0.827444 | 0.930659 |
| 5489 | 10444841 | <a href="#">NM_010391</a>          | <a href="#">15007</a>  | histocompatibility 2, Q region | <a href="#">H2-Q10</a>        | 1.057 | 0.275 | 0.790707 | 0.914692 |
| 5490 | 10445407 | <a href="#">NM_013688</a>          | <a href="#">21645</a>  | t-complex-associated testis ex | <a href="#">Tcte1</a>         | 1.057 | 1.401 | 0.202755 | 0.465349 |
| 5491 | 10445214 | <a href="#">NM_008650</a>          | <a href="#">17850</a>  | methylmalonyl-Coenzyme A mutas | <a href="#">Mut</a>           | 1.057 | 0.867 | 0.41404  | 0.677432 |
| 5492 | 10594609 | <a href="#">NM_175206</a>          | <a href="#">74165</a>  | F-box and leucine-rich repeat  | <a href="#">Fbxl22</a>        | 1.057 | 0.857 | 0.419096 | 0.681475 |
| 5493 | 10359050 | <a href="#">AK172956</a>           | <a href="#">74081</a>  | centrosomal protein 350        | <a href="#">Cep350</a>        | 1.057 | 0.933 | 0.380839 | 0.650316 |
| 5494 | 10507880 |                                    |                        |                                |                               | 1.057 | 1.039 | 0.332199 | 0.608245 |
| 5495 | 10383282 | <a href="#">NM_001085498</a>       | <a href="#">208092</a> | chromatin modifying protein 6  | <a href="#">Chmp6</a>         | 1.057 | 0.805 | 0.4463   | 0.704033 |
| 5496 | 10473847 | <a href="#">NM_007387</a>          | <a href="#">11432</a>  | acid phosphatase 2, lysosomal  | <a href="#">Acp2</a>          | 1.057 | 0.45  | 0.665657 | 0.850998 |
| 5497 | 10561777 | <a href="#">BC027344</a>           | <a href="#">233057</a> | cDNA sequence BC027344         | <a href="#">BC027344</a>      | 1.057 | 0.354 | 0.733667 | 0.886032 |
| 5498 | 10450611 | <a href="#">AK017439</a>           | <a href="#">71377</a>  | RIKEN cDNA 5530401N12 gene     | <a href="#">5530401N12Rik</a> | 1.057 | 0.493 | 0.636655 | 0.834887 |
| 5499 | 10585301 | <a href="#">NM_009041</a>          | <a href="#">19684</a>  | radixin                        | <a href="#">Rdx</a>           | 1.057 | 0.695 | 0.50901  | 0.750516 |
| 5500 | 10558961 | <a href="#">NM_053082</a>          | <a href="#">64540</a>  | tetraspanin 4                  | <a href="#">Tspan4</a>        | 1.057 | 0.651 | 0.53506  | 0.768753 |
| 5501 | 10431393 | <a href="#">NM_013871</a>          | <a href="#">29857</a>  | mitogen-activated protein kina | <a href="#">Mapk12</a>        | 1.057 | 0.689 | 0.51209  | 0.75265  |
| 5502 | 10607862 |                                    |                        |                                |                               | 1.057 | 0.56  | 0.59213  | 0.807064 |
| 5503 | 10587075 |                                    |                        |                                |                               | 1.057 | 0.996 | 0.351578 | 0.624753 |
| 5504 | 10445156 | <a href="#">NM_146630</a>          | <a href="#">258623</a> | olfactory receptor 123         | <a href="#">Olfr123</a>       | 1.057 | 1.523 | 0.170272 | 0.421869 |
| 5505 | 10483719 | <a href="#">NM_001113246</a>       | <a href="#">108699</a> | chimerin (chimaerin) 1         | <a href="#">Chn1</a>          | 1.057 | 0.677 | 0.519632 | 0.757547 |
| 5506 | 10544436 | <a href="#">NM_146444</a>          | <a href="#">258436</a> | olfactory receptor 458         | <a href="#">Olfr458</a>       | 1.057 | 0.866 | 0.414368 | 0.67755  |
| 5507 | 10496490 | <a href="#">ENSMUST00000116120</a> | <a href="#">13684</a>  | eukaryotic translation initiat | <a href="#">Eif4e</a>         | 1.057 | 1.238 | 0.254388 | 0.528633 |
| 5508 | 10366344 | <a href="#">BC054110</a>           | <a href="#">382421</a> | predicted gene, EG382421       | <a href="#">EG382421</a>      | 1.057 | 0.677 | 0.519612 | 0.757547 |
| 5509 | 10461334 | <a href="#">NM_011842</a>          | <a href="#">23942</a>  | metastasis-associated gene fam | <a href="#">Mta2</a>          | 1.056 | 0.533 | 0.610324 | 0.81867  |
| 5510 | 10510700 | <a href="#">NM_178406</a>          | <a href="#">100129</a> | G protein-coupled receptor 153 | <a href="#">Gpr153</a>        | 1.056 | 1.173 | 0.278113 | 0.55314  |
| 5511 | 10593478 | <a href="#">ENSMUST00000098777</a> | <a href="#">408028</a> | RIKEN cDNA 9230115E21 gene     | <a href="#">9230115E21Rik</a> | 1.056 | 1.065 | 0.321165 | 0.598048 |
| 5512 | 10591472 | <a href="#">NM_016742</a>          | <a href="#">12539</a>  | cell division cycle 37 homolog | <a href="#">Cdc37</a>         | 1.056 | 0.313 | 0.762972 | 0.901446 |

|      |          |                                    |                           |                                |                                    |       |       |          |          |
|------|----------|------------------------------------|---------------------------|--------------------------------|------------------------------------|-------|-------|----------|----------|
| 5513 | 10530560 | <a href="#">ENSMUST00000043711</a> | <a href="#">75991</a>     | SLAIN motif family, member 2   | <a href="#">Slain2</a>             | 1.056 | 0.552 | 0.597566 | 0.81066  |
| 5514 | 10353479 | <a href="#">NM_053270</a>          | <a href="#">116837</a>    | regulating synaptic membrane e | <a href="#">Rims1</a>              | 1.056 | 0.284 | 0.784302 | 0.912071 |
| 5515 | 10488404 | <a href="#">NM_030059</a>          | <a href="#">78240</a>     | cystatin 11                    | <a href="#">Cst11</a>              | 1.056 | 1.616 | 0.148809 | 0.391099 |
| 5516 | 10461497 | <a href="#">NM_015735</a>          | <a href="#">13194</a>     | damage specific DNA binding pr | <a href="#">Ddb1</a>               | 1.056 | 0.484 | 0.642956 | 0.838239 |
| 5517 | 10436664 |                                    |                           |                                |                                    | 1.056 | 1.212 | 0.263662 | 0.538479 |
| 5518 | 10493009 | <a href="#">NM_001003912</a>       | <a href="#">213498</a>    | Rho guanine nucleotide exchang | <a href="#">Arhgef11</a>           | 1.056 | 0.866 | 0.414208 | 0.677446 |
| 5519 | 10461158 | <a href="#">AK051045</a>           | <a href="#">83673</a>     | small nucleolar RNA host gene  | <a href="#">Snhg1</a>              | 1.056 | 1.771 | 0.118687 | 0.344006 |
| 5520 | 10403462 | <a href="#">NM_001081426</a>       | <a href="#">208440</a>    | DIP2 disco-interacting protein | <a href="#">Dip2c</a>              | 1.056 | 0.481 | 0.644853 | 0.83943  |
| 5521 | 10402542 | <a href="#">NM_029654</a>          | <a href="#">76559</a>     | ATG2 autophagy related 2 homol | <a href="#">Atg2b</a>              | 1.056 | 0.464 | 0.656283 | 0.846043 |
| 5522 | 10538373 | <a href="#">NM_030024</a>          | <a href="#">78004</a>     | proline rich 15                | <a href="#">Prr15</a>              | 1.056 | 0.74  | 0.482745 | 0.731475 |
| 5523 | 10377117 | <a href="#">NM_010855</a>          | <a href="#">17884</a>     | myosin, heavy polypeptide 4, s | <a href="#">Myh4</a>               | 1.056 | 0.758 | 0.472398 | 0.724111 |
| 5524 | 10555879 | <a href="#">NM_147075</a>          | <a href="#">259078</a>    | olfactory receptor 656         | <a href="#">Olf656</a>             | 1.056 | 1.481 | 0.180861 | 0.436777 |
| 5525 | 10515716 | <a href="#">ENSMUST00000075406</a> | <a href="#">230676</a>    | cDNA sequence BC059842         | <a href="#">BC059842</a>           | 1.056 | 0.305 | 0.768892 | 0.904046 |
| 5526 | 10536273 | <a href="#">NM_145398</a>          | <a href="#">213819</a>    | CAS1 domain containing 1       | <a href="#">Casd1</a>              | 1.056 | 0.844 | 0.425909 | 0.687657 |
| 5527 | 10419062 | <a href="#">NM_177816</a>          | <a href="#">328381</a>    | SH2 domain containing 4B       | <a href="#">Sh2d4b</a>             | 1.056 | 1.121 | 0.298095 | 0.574141 |
| 5528 | 10345571 | <a href="#">NM_009918</a>          | <a href="#">12790</a>     | cyclic nucleotide gated channe | <a href="#">Cnga3</a>              | 1.056 | 1.328 | 0.224775 | 0.494893 |
| 5529 | 10404630 | <a href="#">NM_024242</a>          | <a href="#">71340</a>     | RIO kinase 1 (yeast)           | <a href="#">Riok1</a>              | 1.056 | 0.22  | 0.832065 | 0.932638 |
| 5530 | 10440558 | <a href="#">NM_001081068</a>       | <a href="#">78913</a>     | zinc finger protein 294        | <a href="#">Zfp294</a>             | 1.056 | 0.332 | 0.749251 | 0.893972 |
| 5531 | 10550345 | <a href="#">NM_133789</a>          | <a href="#">97387</a>     | striatin, calmodulin binding p | <a href="#">Strn4</a>              | 1.056 | 0.586 | 0.575655 | 0.797076 |
| 5532 | 10581538 | <a href="#">NM_008706</a>          | <a href="#">18104</a>     | NAD(P)H dehydrogenase, quinone | <a href="#">Nqo1</a>               | 1.056 | 0.399 | 0.701515 | 0.869143 |
| 5533 | 10568765 | <a href="#">NM_183289</a>          | <a href="#">70571</a>     | transcription elongation regul | <a href="#">Tcerg11</a>            | 1.056 | 0.39  | 0.707789 | 0.872268 |
| 5534 | 10578703 | <a href="#">NM_029701</a>          | <a href="#">76687</a>     | signal peptidase complex subun | <a href="#">Spec3</a>              | 1.056 | 1.087 | 0.31184  | 0.58829  |
| 5535 | 10535091 | <a href="#">BC016220</a>           | <a href="#">78792</a>     | RIKEN cDNA 4930432F04 gene     | <a href="#">4930432F04Rik</a>      | 1.056 | 0.752 | 0.476001 | 0.727266 |
| 5536 | 10433721 | <a href="#">NM_023317</a>          | <a href="#">67203</a>     | nuclear distribution gene E ho | <a href="#">Nde1</a>               | 1.056 | 0.668 | 0.524696 | 0.761127 |
| 5537 | 10430745 | <a href="#">ENSMUST00000072910</a> | <a href="#">214685</a>    | RIKEN cDNA D930017K21 gene     | <a href="#">D930017K21Rik</a>      | 1.056 | 0.899 | 0.397878 | 0.664302 |
| 5538 | 10472598 | <a href="#">NM_177784</a>          | <a href="#">277396</a>    | kelch-like 23 (Drosophila)     | <a href="#">Klh23</a>              | 1.056 | 0.6   | 0.566762 | 0.792465 |
| 5539 | 10410776 |                                    |                           |                                |                                    | 1.056 | 0.98  | 0.358856 | 0.630937 |
| 5540 | 10391963 | <a href="#">NM_008740</a>          | <a href="#">18195</a>     | N-ethylmaleimide sensitive fus | <a href="#">Nsf</a>                | 1.056 | 0.869 | 0.412916 | 0.676379 |
| 5541 | 10438942 | <a href="#">NM_172614</a>          | <a href="#">224090</a>    | transmembrane protein 44       | <a href="#">Tmem44</a>             | 1.056 | 1.249 | 0.25056  | 0.524406 |
| 5542 | 10445774 | <a href="#">AY522648</a>           | <a href="#">320148</a>    | RIKEN cDNA B430306N03 gene     | <a href="#">B430306N03Rik</a>      | 1.056 | 1.044 | 0.330426 | 0.606628 |
| 5543 | 10581772 | <a href="#">NM_009149</a>          | <a href="#">20340</a>     | golgi apparatus protein 1      | <a href="#">Glg1</a>               | 1.056 | 0.514 | 0.622882 | 0.827402 |
| 5544 | 10514815 | <a href="#">AK028711</a>           | <a href="#">329909</a>    | transmembrane protein 61       | <a href="#">Tmem61</a>             | 1.056 | 0.895 | 0.399569 | 0.665716 |
| 5545 | 10350975 | <a href="#">ENSMUST00000097514</a> | <a href="#">100038672</a> | predicted gene, ENSMUSG0000007 | <a href="#">ENSMUSG00000073528</a> | 1.056 | 1.321 | 0.226748 | 0.497443 |
| 5546 | 10480891 | <a href="#">NM_133835</a>          | <a href="#">98766</a>     | ubiquitin associated domain co | <a href="#">Uba1</a>               | 1.056 | 0.522 | 0.617082 | 0.823029 |
| 5547 | 10418921 | <a href="#">NM_011430</a>          | <a href="#">20618</a>     | synuclein, gamma               | <a href="#">Sncg</a>               | 1.056 | 0.593 | 0.571293 | 0.795379 |
| 5548 | 10432473 | <a href="#">BC072572</a>           | <a href="#">380969</a>    | Riken cDNA C230021P08 gene     | <a href="#">C230021P08Rik</a>      | 1.056 | 1.357 | 0.215802 | 0.482925 |
| 5549 | 10476383 | <a href="#">NM_001024385</a>       | <a href="#">66586</a>     | cardiolipin synthase 1         | <a href="#">Crls1</a>              | 1.056 | 0.447 | 0.667994 | 0.851925 |
| 5550 | 10401926 |                                    |                           |                                |                                    | 1.056 | 0.684 | 0.515111 | 0.754817 |
| 5551 | 10348618 | <a href="#">NM_001039126</a>       | <a href="#">65247</a>     | ankyrin repeat and SOCS box-co | <a href="#">Asb1</a>               | 1.055 | 1.023 | 0.339465 | 0.614887 |
| 5552 | 10494016 | <a href="#">NM_025416</a>          | <a href="#">66198</a>     | thioesterase superfamily membe | <a href="#">Them5</a>              | 1.055 | 0.67  | 0.523953 | 0.760561 |
| 5553 | 10555470 | <a href="#">NM_001040111</a>       | <a href="#">69710</a>     | centaurin, delta 2             | <a href="#">Centd2</a>             | 1.055 | 1.334 | 0.22272  | 0.492656 |
| 5554 | 10439404 | <a href="#">XM_001478262</a>       | <a href="#">100047488</a> | similar to hCG1657343          | <a href="#">LOC100047488</a>       | 1.055 | 1.001 | 0.349114 | 0.622715 |
| 5555 | 10366956 | <a href="#">NM_009284</a>          | <a href="#">20852</a>     | signal transducer and activato | <a href="#">Stat6</a>              | 1.055 | 0.204 | 0.844246 | 0.936764 |
| 5556 | 10477372 | <a href="#">NM_025631</a>          | <a href="#">66557</a>     | bactericidal/permeability-incr | <a href="#">Bpil1</a>              | 1.055 | 1.811 | 0.111725 | 0.33081  |
| 5557 | 10468131 | <a href="#">NM_198296</a>          | <a href="#">71617</a>     | RIKEN cDNA 9130011E15 gene     | <a href="#">9130011E15Rik</a>      | 1.055 | 0.679 | 0.518142 | 0.756879 |
| 5558 | 10435024 | <a href="#">NM_027355</a>          | <a href="#">70238</a>     | ring fnger protein 168         | <a href="#">Rnf168</a>             | 1.055 | 0.848 | 0.42391  | 0.686151 |
| 5559 | 10380887 | <a href="#">NM_011540</a>          | <a href="#">21393</a>     | titin-cap                      | <a href="#">Tcap</a>               | 1.055 | 0.741 | 0.482039 | 0.730954 |
| 5560 | 10467538 | <a href="#">NM_011904</a>          | <a href="#">24087</a>     | toll-like 2                    | <a href="#">Tlr2</a>               | 1.055 | 1.226 | 0.258769 | 0.522905 |
| 5561 | 10370210 | <a href="#">NM_009933</a>          | <a href="#">12853</a>     | collagen, type VI, alpha 1     | <a href="#">Col6a1</a>             | 1.055 | 0.653 | 0.534045 | 0.767997 |
| 5562 | 10393320 | <a href="#">NM_173755</a>          | <a href="#">217342</a>    | ubiquitin-conjugating enzyme E | <a href="#">Ube2o</a>              | 1.055 | 1.377 | 0.209701 | 0.474741 |
| 5563 | 10429444 | <a href="#">ENSMUST00000110021</a> | <a href="#">268816</a>    | gene model 628, (NCBI)         | <a href="#">Gm628</a>              | 1.055 | 0.672 | 0.522363 | 0.75928  |
| 5564 | 10355511 | <a href="#">NM_009407</a>          | <a href="#">21958</a>     | transition protein 1           | <a href="#">Tnp1</a>               | 1.055 | 0.857 | 0.418871 | 0.681435 |
| 5565 | 10606936 | <a href="#">XR_031468</a>          | <a href="#">622432</a>    | similar to Glyceraldehyde-3-ph | <a href="#">LOC622432</a>          | 1.055 | 0.494 | 0.635799 | 0.834627 |

|      |          |                                    |                           |                                |                                    |       |       |          |          |
|------|----------|------------------------------------|---------------------------|--------------------------------|------------------------------------|-------|-------|----------|----------|
| 5566 | 10400762 | <a href="#">NM_201519</a>          | <a href="#">399510</a>    | mitogen-activated protein kina | <a href="#">Map4k5</a>             | 1.055 | 0.733 | 0.486453 | 0.734369 |
| 5567 | 10536595 | <a href="#">NM_133939</a>          | <a href="#">76522</a>     | LSM8 homolog, U6 small nuclear | <a href="#">Lsm8</a>               | 1.055 | 0.889 | 0.4025   | 0.667563 |
| 5568 | 10452269 | <a href="#">NM_153551</a>          | <a href="#">70785</a>     | DENN/MADD domain containing 1C | <a href="#">Dennd1c</a>            | 1.055 | 0.752 | 0.475855 | 0.727249 |
| 5569 | 10554094 | <a href="#">NM_010513</a>          | <a href="#">16001</a>     | insulin-like growth factor I r | <a href="#">Igf1r</a>              | 1.055 | 0.51  | 0.625513 | 0.829311 |
| 5570 | 10431352 | <a href="#">ENSMUST00000109353</a> | <a href="#">328580</a>    | tubulin, gamma complex associa | <a href="#">Tubgcp6</a>            | 1.055 | 1.186 | 0.273219 | 0.547785 |
| 5571 | 10402766 | <a href="#">NM_009652</a>          | <a href="#">11651</a>     | thymoma viral proto-oncogene 1 | <a href="#">Akt1</a>               | 1.055 | 0.396 | 0.703439 | 0.869898 |
| 5572 | 10492709 | <a href="#">NM_021370</a>          | <a href="#">58170</a>     | amiloride-sensitive cation cha | <a href="#">Accn5</a>              | 1.055 | 0.55  | 0.599102 | 0.811784 |
| 5573 | 10430574 | <a href="#">BC118956</a>           | <a href="#">75729</a>     | RIKEN cDNA 4933432B09 gene     | <a href="#">4933432B09Rik</a>      | 1.055 | 0.976 | 0.36056  | 0.632355 |
| 5574 | 10402378 | <a href="#">ENSMUST00000095451</a> | <a href="#">194604</a>    | gene model 46, (NCBI)          | <a href="#">Gm46</a>               | 1.055 | 0.75  | 0.476889 | 0.727649 |
| 5575 | 10352267 | <a href="#">NM_001103182</a>       | <a href="#">72568</a>     | lin-9 homolog (C. elegans)     | <a href="#">Lin9</a>               | 1.055 | 0.394 | 0.704782 | 0.871013 |
| 5576 | 10565591 | <a href="#">ENSMUST00000065257</a> | <a href="#">791381</a>    | predicted gene, OTTMUSG0000002 | <a href="#">OTTMUSG00000021246</a> | 1.055 | 0.29  | 0.780326 | 0.910803 |
| 5577 | 10420594 | <a href="#">NM_183175</a>          | <a href="#">239126</a>    | C1q and tumor necrosis factor  | <a href="#">C1qtnf9</a>            | 1.055 | 0.707 | 0.501618 | 0.744504 |
| 5578 | 10347324 | <a href="#">NM_001033345</a>       | <a href="#">241112</a>    | gene model 216, (NCBI)         | <a href="#">Gm216</a>              | 1.055 | 1.241 | 0.253327 | 0.527654 |
| 5579 | 10475623 | <a href="#">ENSMUST00000066157</a> | <a href="#">100036535</a> | predicted gene, ENSMUSG0000005 | <a href="#">ENSMUSG00000053615</a> | 1.055 | 1.11  | 0.302645 | 0.578712 |
| 5580 | 10393241 | <a href="#">NM_016857</a>          | <a href="#">53413</a>     | exocyst complex component 7    | <a href="#">Exoc7</a>              | 1.055 | 0.841 | 0.427508 | 0.688756 |
| 5581 | 10541524 | <a href="#">NM_028016</a>          | <a href="#">71950</a>     | Nanog homeobox                 | <a href="#">Nanog</a>              | 1.055 | 0.774 | 0.463775 | 0.717865 |
| 5582 | 10603431 | <a href="#">NM_011514</a>          | <a href="#">20937</a>     | suppressor of variegation 3-9  | <a href="#">Suv39h1</a>            | 1.055 | 0.302 | 0.771412 | 0.905701 |
| 5583 | 10437292 | <a href="#">NM_177472</a>          | <a href="#">52864</a>     | BTB (POZ) domain containing 12 | <a href="#">Btbd12</a>             | 1.055 | 1.119 | 0.299051 | 0.575096 |
| 5584 | 10392683 | <a href="#">ENSMUST00000100258</a> | <a href="#">100038364</a> | predicted gene, ENSMUSG0000007 | <a href="#">ENSMUSG00000075442</a> | 1.055 | 0.685 | 0.514544 | 0.754736 |
| 5585 | 10605740 | <a href="#">NM_012010</a>          | <a href="#">26905</a>     | eukaryotic translation initiat | <a href="#">Eif2s3x</a>            | 1.055 | 0.77  | 0.465796 | 0.719391 |
| 5586 | 10536324 | <a href="#">NM_023048</a>          | <a href="#">65255</a>     | ankyrin repeat and SOCS box-co | <a href="#">Asb4</a>               | 1.055 | 0.046 | 0.964814 | 0.986033 |
| 5587 | 10411199 | <a href="#">NM_025630</a>          | <a href="#">66549</a>     | angiogenic factor with G patch | <a href="#">Aggf1</a>              | 1.055 | 0.247 | 0.81155  | 0.923946 |
| 5588 | 10450744 | <a href="#">XR_034279</a>          | <a href="#">677333</a>    | similar to histone H3          | <a href="#">LOC677333</a>          | 1.055 | 0.525 | 0.615568 | 0.822286 |
| 5589 | 10390780 | <a href="#">BC079890</a>           | <a href="#">268481</a>    | keratin 222                    | <a href="#">Krt222</a>             | 1.055 | 0.55  | 0.599103 | 0.811784 |
| 5590 | 10522784 | <a href="#">ENSMUST00000100472</a> | <a href="#">100039489</a> | similar to Hmgn2 protein       | <a href="#">LOC100039489</a>       | 1.055 | 0.375 | 0.718167 | 0.87698  |
| 5591 | 10436734 | <a href="#">NM_007520</a>          | <a href="#">12013</a>     | BTB and CNC homology 1         | <a href="#">Bach1</a>              | 1.055 | 1.08  | 0.315057 | 0.591982 |
| 5592 | 10572050 | <a href="#">NM_175188</a>          | <a href="#">72925</a>     | membrane-associated ring finge | <a href="#">March1</a>             | 1.055 | 1.351 | 0.217654 | 0.4854   |
| 5593 | 10569494 | <a href="#">NM_023680</a>          | <a href="#">79202</a>     | tumor necrosis factor receptor | <a href="#">Tnfrsf22</a>           | 1.054 | 0.658 | 0.530857 | 0.76539  |
| 5594 | 10421418 | <a href="#">NM_013514</a>          | <a href="#">13829</a>     | erythrocyte protein band 4.9   | <a href="#">Epb4.9</a>             | 1.054 | 0.921 | 0.386822 | 0.655838 |
| 5595 | 10348456 | <a href="#">NM_133805</a>          | <a href="#">108679</a>    | COP9 (constitutive photomorpho | <a href="#">Cops8</a>              | 1.054 | 0.491 | 0.637972 | 0.835923 |
| 5596 | 10541491 | <a href="#">ENSMUST00000043553</a> | <a href="#">74269</a>     | RIKEN cDNA 1700063H04 gene     | <a href="#">1700063H04Rik</a>      | 1.054 | 0.682 | 0.516457 | 0.75576  |
| 5597 | 10372917 | <a href="#">NM_153059</a>          | <a href="#">216395</a>    | transmembrane protein 5        | <a href="#">Tmem5</a>              | 1.054 | 0.903 | 0.395691 | 0.663394 |
| 5598 | 10453399 | <a href="#">BC100359</a>           | <a href="#">78586</a>     | S1 RNA binding domain 1        | <a href="#">Srbd1</a>              | 1.054 | 0.108 | 0.917222 | 0.967414 |
| 5599 | 10539220 | <a href="#">NM_177884</a>          | <a href="#">330361</a>    | expressed sequence AW146020    | <a href="#">AW146020</a>           | 1.054 | 0.599 | 0.567238 | 0.792635 |
| 5600 | 10515337 | <a href="#">NM_016777</a>          | <a href="#">50927</a>     | nuclear autoantigenic sperm pr | <a href="#">Nasp</a>               | 1.054 | 1.157 | 0.28418  | 0.559417 |
| 5601 | 10514930 | <a href="#">ENSMUST00000030352</a> | <a href="#">78109</a>     | RIKEN cDNA 4930430J20 gene     | <a href="#">4930430J20Rik</a>      | 1.054 | 1.119 | 0.29896  | 0.575074 |
| 5602 | 10561073 | <a href="#">NM_177102</a>          | <a href="#">320208</a>    | transmembrane protein 91       | <a href="#">Tmem91</a>             | 1.054 | 0.857 | 0.418994 | 0.681474 |
| 5603 | 10526311 | <a href="#">NM_009745</a>          | <a href="#">12054</a>     | B-cell CLL/lymphoma 7B         | <a href="#">Bcl7b</a>              | 1.054 | 0.26  | 0.802453 | 0.919965 |
| 5604 | 10576115 | <a href="#">NM_145834</a>          | <a href="#">234836</a>    | interleukin 17C                | <a href="#">Il17c</a>              | 1.054 | 1.287 | 0.237755 | 0.510106 |
| 5605 | 10395628 | <a href="#">NM_029825</a>          | <a href="#">76983</a>     | sec1 family domain containing  | <a href="#">Scfd1</a>              | 1.054 | 0.223 | 0.830015 | 0.931618 |
| 5606 | 10550972 | <a href="#">NM_001102613</a>       | <a href="#">232970</a>    | pleckstrin homology-like domai | <a href="#">Phldb3</a>             | 1.054 | 1.432 | 0.194027 | 0.453766 |
| 5607 | 10371188 | <a href="#">ENSMUST00000063065</a> | <a href="#">319586</a>    | bruno-like 5, RNA binding prot | <a href="#">Bruno5</a>             | 1.054 | 0.997 | 0.351206 | 0.624551 |
| 5608 | 10525741 | <a href="#">NM_029532</a>          | <a href="#">76167</a>     | RIKEN cDNA 6330548G22 gene     | <a href="#">6330548G22Rik</a>      | 1.054 | 0.919 | 0.387857 | 0.656721 |
| 5609 | 10550865 | <a href="#">NM_009567</a>          | <a href="#">22755</a>     | zinc finger protein 93         | <a href="#">Zfp93</a>              | 1.054 | 0.938 | 0.378799 | 0.648423 |
| 5610 | 10377982 | <a href="#">NM_153103</a>          | <a href="#">16562</a>     | kinesin family member 1C       | <a href="#">Kif1c</a>              | 1.054 | 0.343 | 0.74116  | 0.889595 |
| 5611 | 10377802 |                                    |                           |                                |                                    | 1.054 | 0.658 | 0.530771 | 0.76539  |
| 5612 | 10401382 | <a href="#">NM_010949</a>          | <a href="#">18222</a>     | numb gene homolog (Drosophila) | <a href="#">Numb</a>               | 1.054 | 0.959 | 0.368504 | 0.639236 |
| 5613 | 10508228 | <a href="#">NM_177462</a>          | <a href="#">100177</a>    | zinc finger, MYM-type 6        | <a href="#">Zmym6</a>              | 1.054 | 0.379 | 0.715762 | 0.875402 |
| 5614 | 10422710 |                                    |                           |                                |                                    | 1.054 | 0.544 | 0.620305 | 0.814471 |

|      |          |                                    |                           |                                        |                               |       |       |          |          |
|------|----------|------------------------------------|---------------------------|----------------------------------------|-------------------------------|-------|-------|----------|----------|
| 5614 | 10455719 |                                    |                           |                                        |                               | 1.054 | 0.544 | 0.005105 | 0.814471 |
| 5615 | 10401235 |                                    |                           |                                        |                               | 1.054 | 0.979 | 0.35925  | 0.631315 |
| 5616 | 10507238 | <a href="#">NM_153521</a>          | <a href="#">230654</a>    | leucine rich repeat containing         | <a href="#">Lrrc41</a>        | 1.054 | 0     | 0.999815 | 0.99988  |
| 5617 | 10547906 | <a href="#">NM_008479</a>          | <a href="#">16768</a>     | lymphocyte-activation gene 3           | <a href="#">Lag3</a>          | 1.054 | 1.024 | 0.33913  | 0.614614 |
| 5618 | 10587534 | <a href="#">NM_199195</a>          | <a href="#">12040</a>     | branched chain ketoacid dehydr         | <a href="#">Bckdhh</a>        | 1.054 | 0.541 | 0.605066 | 0.815765 |
| 5619 | 10485312 |                                    |                           |                                        |                               | 1.054 | 0.604 | 0.564063 | 0.790466 |
| 5620 | 10573332 | <a href="#">BC075658</a>           | <a href="#">74666</a>     | RIKEN cDNA 4930432K21 gene             | <a href="#">4930432K21Rik</a> | 1.054 | 0.392 | 0.706362 | 0.871814 |
| 5621 | 10467041 | <a href="#">NM_018830</a>          | <a href="#">54447</a>     | N-acylsphingosine amidohydrola         | <a href="#">Asah2</a>         | 1.054 | 0.977 | 0.360074 | 0.632184 |
| 5622 | 10602625 | <a href="#">NM_001005475</a>       | <a href="#">245666</a>    | IQ motif and Sec7 domain 2             | <a href="#">Iqsec2</a>        | 1.054 | 1.164 | 0.281593 | 0.556928 |
| 5623 | 10350046 | <a href="#">NM_152895</a>          | <a href="#">75605</a>     | jumonji, AT rich interactive d         | <a href="#">Jarid1b</a>       | 1.054 | 1.009 | 0.345498 | 0.619663 |
| 5624 | 10516490 | <a href="#">NM_010291</a>          | <a href="#">14622</a>     | gap junction protein, beta 5           | <a href="#">Gjb5</a>          | 1.054 | 0.49  | 0.638888 | 0.835923 |
| 5625 | 10495134 | <a href="#">XM_001479553</a>       | <a href="#">100043129</a> | similar to hCG2040565                  | <a href="#">LOC100043129</a>  | 1.054 | 0.784 | 0.457833 | 0.713313 |
| 5626 | 10378482 | <a href="#">NM_026197</a>          | <a href="#">67493</a>     | methyltransferase 10 domain co         | <a href="#">Mett10d</a>       | 1.054 | 0.468 | 0.653765 | 0.844785 |
| 5627 | 10519392 | <a href="#">NM_030675</a>          | <a href="#">79264</a>     | KRIT1, ankyrin repeat containi         | <a href="#">Krit1</a>         | 1.054 | 0.473 | 0.649988 | 0.842995 |
| 5628 | 10588226 | <a href="#">NM_019764</a>          | <a href="#">56332</a>     | angiomin like 2                        | <a href="#">Amotl2</a>        | 1.054 | 1.005 | 0.34759  | 0.621575 |
| 5629 | 10433620 | <a href="#">NM_015769</a>          | <a href="#">50505</a>     | excision repair cross-compleme         | <a href="#">Ercc4</a>         | 1.054 | 0.524 | 0.616317 | 0.822742 |
| 5630 | 10404870 |                                    |                           |                                        |                               | 1.054 | 0.609 | 0.561277 | 0.788442 |
| 5631 | 10546152 | <a href="#">NM_176973</a>          | <a href="#">319655</a>    | podocalyxin-like 2                     | <a href="#">Podxl2</a>        | 1.054 | 0.378 | 0.716118 | 0.875591 |
| 5632 | 10410355 | <a href="#">NM_183146</a>          | <a href="#">212281</a>    | RIKEN cDNA A530054K11 gene             | <a href="#">A530054K11Rik</a> | 1.054 | 0.455 | 0.662437 | 0.849733 |
| 5633 | 10541785 | <a href="#">NM_016845</a>          | <a href="#">54137</a>     | proacrosin binding protein             | <a href="#">Acrbp</a>         | 1.054 | 0.826 | 0.435455 | 0.695585 |
| 5634 | 10449979 | <a href="#">NM_177719</a>          | <a href="#">240069</a>    | microorchidia 2B                       | <a href="#">Morc2b</a>        | 1.054 | 0.847 | 0.424078 | 0.686315 |
| 5635 | 10509500 | <a href="#">NM_010470</a>          | <a href="#">15441</a>     | heterochromatin protein 1, bin         | <a href="#">Hp1bp3</a>        | 1.054 | 0.992 | 0.353187 | 0.625979 |
| 5636 | 10392012 | <a href="#">NM_145436</a>          | <a href="#">217232</a>    | cell division cycle 27 homolog         | <a href="#">Cdc27</a>         | 1.054 | 0.672 | 0.522228 | 0.75916  |
| 5637 | 10558285 | <a href="#">NM_207302</a>          | <a href="#">360216</a>    | zinc finger, RAN-binding domai         | <a href="#">Zranb1</a>        | 1.054 | 0.576 | 0.582267 | 0.800796 |
| 5638 | 10487371 | <a href="#">NM_025296</a>          | <a href="#">26371</a>     | cytosolic iron-sulfur protein          | <a href="#">Ciao1</a>         | 1.054 | 0.448 | 0.66761  | 0.851783 |
| 5639 | 10394912 |                                    |                           |                                        |                               | 1.054 | 0.39  | 0.707772 | 0.872268 |
| 5640 | 10346810 | <a href="#">NM_001081050</a>       | <a href="#">72823</a>     | par-3 partitioning defective 3         | <a href="#">Pard3b</a>        | 1.054 | 0.374 | 0.719146 | 0.877614 |
| 5641 | 10519333 | <a href="#">NM_001042501</a>       | <a href="#">68152</a>     | RIKEN cDNA 5830415L20 gene             | <a href="#">5830415L20Rik</a> | 1.054 | 0.432 | 0.67829  | 0.857067 |
| 5642 | 10476287 | <a href="#">NM_153501</a>          | <a href="#">74450</a>     | pantothenate kinase 2 (Hallerv         | <a href="#">Pank2</a>         | 1.054 | 0.719 | 0.494774 | 0.739747 |
| 5643 | 10524284 | <a href="#">BC046779</a>           | <a href="#">209683</a>    | tetratricopeptide repeat domai         | <a href="#">Ttc28</a>         | 1.053 | 1.235 | 0.255649 | 0.529946 |
| 5644 | 10409076 | <a href="#">NM_011078</a>          | <a href="#">18676</a>     | PHD finger protein 2                   | <a href="#">Phf2</a>          | 1.053 | 0.806 | 0.445993 | 0.703841 |
| 5645 | 10440903 | <a href="#">BC032975</a>           | <a href="#">74387</a>     | RIKEN cDNA 4932438H23 gene             | <a href="#">4932438H23Rik</a> | 1.053 | 0.611 | 0.560045 | 0.787428 |
| 5646 | 10364321 | <a href="#">NM_010670</a>          | <a href="#">16694</a>     | keratin associated protein 12-         | <a href="#">Krtap12-1</a>     | 1.053 | 0.823 | 0.43681  | 0.696333 |
| 5647 | 10589800 | <a href="#">NM_001114347</a>       | <a href="#">76499</a>     | CLIP associating protein 2             | <a href="#">Clasp2</a>        | 1.053 | 0.915 | 0.389546 | 0.658209 |
| 5648 | 10354400 |                                    |                           |                                        |                               | 1.053 | 1.052 | 0.326656 | 0.602834 |
| 5649 | 10546834 | <a href="#">NM_021385</a>          | <a href="#">58186</a>     | RAD18 homolog ( <i>S. cerevisiae</i> ) | <a href="#">Rad18</a>         | 1.053 | 0.806 | 0.445868 | 0.703765 |
| 5650 | 10468970 | <a href="#">BC119609</a>           | <a href="#">18686</a>     | per-hexamer repeat gene 1              | <a href="#">Phxr1</a>         | 1.053 | 1.042 | 0.331212 | 0.60765  |
| 5651 | 10451907 | <a href="#">NM_013664</a>          | <a href="#">20405</a>     | SH3-domain GRB2-like 1                 | <a href="#">Sh3gl1</a>        | 1.053 | 0.415 | 0.690239 | 0.864076 |
| 5652 | 10443110 | <a href="#">XM_985548</a>          | <a href="#">240057</a>    | synaptic Ras GTPase activating         | <a href="#">Syngap1</a>       | 1.053 | 0.886 | 0.404006 | 0.668777 |
| 5653 | 10600504 | <a href="#">NM_026126</a>          | <a href="#">67391</a>     | FUN14 domain containing 2              | <a href="#">Funde2</a>        | 1.053 | 0.249 | 0.810522 | 0.923665 |
| 5654 | 10439932 |                                    |                           |                                        |                               | 1.053 | 0.323 | 0.755987 | 0.897759 |
| 5655 | 10550723 | <a href="#">BC118925</a>           | <a href="#">69547</a>     | NTPase, KAP family P-loop doma         | <a href="#">Nkpd1</a>         | 1.053 | 0.673 | 0.521748 | 0.75888  |
| 5656 | 10580233 | <a href="#">NM_008097</a>          | <a href="#">270076</a>    | glutaryl-Coenzyme A dehydrogen         | <a href="#">Gedh</a>          | 1.053 | 0.373 | 0.720156 | 0.878163 |
| 5657 | 10405785 | <a href="#">NM_023507</a>          | <a href="#">76251</a>     | RIKEN cDNA 0610007P08 gene             | <a href="#">0610007P08Rik</a> | 1.053 | 0.388 | 0.709136 | 0.872707 |
| 5658 | 10557626 | <a href="#">XM_001480376</a>       | <a href="#">100043590</a> | similar to SMT3B protein               | <a href="#">LOC100043590</a>  | 1.053 | 0.744 | 0.480168 | 0.729941 |
| 5659 | 10491438 | <a href="#">NM_025978</a>          | <a href="#">67120</a>     | tetratricopeptide repeat domai         | <a href="#">Ttc14</a>         | 1.053 | 0.83  | 0.433109 | 0.693552 |
| 5660 | 10500948 | <a href="#">NM_030249</a>          | <a href="#">80281</a>     | CTTNBP2 N-terminal like                | <a href="#">Cttnbp2nl</a>     | 1.053 | 0.81  | 0.443985 | 0.702635 |
| 5661 | 10408010 | <a href="#">NM_023685</a>          | <a href="#">72739</a>     | zinc finger with KRAB and SCAN         | <a href="#">Zkscan3</a>       | 1.053 | 0.676 | 0.519865 | 0.757566 |
| 5662 | 10604337 |                                    |                           |                                        |                               | 1.053 | 0.639 | 0.5424   | 0.774847 |
| 5663 | 10565837 | <a href="#">ENSMUST00000065741</a> | <a href="#">442845</a>    | RIKEN cDNA F730035P03 gene             | <a href="#">F730035P03Rik</a> | 1.053 | 1.37  | 0.211867 | 0.477389 |
| 5664 | 10395538 | <a href="#">NM_026164</a>          | <a href="#">67452</a>     | patatin-like phospholipase dom         | <a href="#">Pnpla8</a>        | 1.053 | 0.029 | 0.97765  | 0.990817 |
| 5665 | 10559516 | <a href="#">NM_175372</a>          | <a href="#">108841</a>    | retinol dehydrogenase 13 (all-         | <a href="#">Rdh13</a>         | 1.053 | 0.736 | 0.48474  | 0.733195 |

|      |          |                                    |                           |                                            |                                    |       |        |           |          |
|------|----------|------------------------------------|---------------------------|--------------------------------------------|------------------------------------|-------|--------|-----------|----------|
| 5666 | 10501754 | <a href="#">NM_177664</a>          | <a href="#">229791</a>    | DNA segment, Chr 3, Brigham &              | <a href="#">D3Bwg0562e</a>         | 1.053 | 1.261  | 0.246643  | 0.519839 |
| 5667 | 10444114 | <a href="#">NM_172620</a>          | <a href="#">224705</a>    | vacuolar protein sorting 52 (y             | <a href="#">Vps52</a>              | 1.053 | 0.17   | 0.869799  | 0.947894 |
| 5668 | 10591616 | <a href="#">NM_177030</a>          | <a href="#">319899</a>    | dedicator of cytokinesis 6                 | <a href="#">Dock6</a>              | 1.053 | 1.022  | 0.340002  | 0.615381 |
| 5669 | 10567576 | <a href="#">ENSMUST00000065740</a> | <a href="#">791343</a>    | predicted gene, ENSMUSG00000005            | <a href="#">ENSMUSG00000053358</a> | 1.053 | 0.679  | 0.518622  | 0.757094 |
| 5670 | 10429754 | <a href="#">NM_144847</a>          | <a href="#">223649</a>    | nuclear receptor binding prote             | <a href="#">Nrbp2</a>              | 1.053 | 0.711  | 0.499346  | 0.742592 |
| 5671 | 10452445 | <a href="#">ENSMUST00000024896</a> | <a href="#">78057</a>     | RIKEN cDNA 4930583109 gene                 | <a href="#">4930583109Rik</a>      | 1.053 | 0.456  | 0.661522  | 0.849255 |
| 5672 | 10553559 | <a href="#">NM_178706</a>          | <a href="#">233274</a>    | sialic acid binding Ig-like le             | <a href="#">Siglech</a>            | 1.053 | 1.157  | 0.28403   | 0.559277 |
| 5673 | 10398972 | <a href="#">NM_054081</a>          | <a href="#">116870</a>    | metastasis associated 1                    | <a href="#">Mta1</a>               | 1.053 | 0.278  | 0.788448  | 0.913849 |
| 5674 | 10511416 | <a href="#">NM_145711</a>          | <a href="#">252838</a>    | thymocyte selection-associated             | <a href="#">Tox</a>                | 1.053 | -0.384 | 0.712362  | 0.874031 |
| 5675 | 10592342 | <a href="#">NM_025289</a>          | <a href="#">21376</a>     | transforming growth factor bet             | <a href="#">Tbrg1</a>              | 1.053 | -0.029 | 0.977283  | 0.990677 |
| 5676 | 10537102 | <a href="#">NM_009148</a>          | <a href="#">20336</a>     | exocyst complex component 4                | <a href="#">Exoc4</a>              | 1.053 | 0.813  | 0.442206  | 0.700945 |
| 5677 | 10423768 | <a href="#">AK144597</a>           | <a href="#">100038592</a> | predicted gene, ENSMUSG00000007            | <a href="#">ENSMUSG00000072619</a> | 1.053 | 1.157  | 0.284325  | 0.559599 |
| 5678 | 10496629 | <a href="#">NM_053102</a>          | <a href="#">93684</a>     | selenoprotein                              | <a href="#">Sep15</a>              | 1.053 | 0.41   | 0.693697  | 0.865705 |
| 5679 | 10456439 | <a href="#">BC064462</a>           | <a href="#">70799</a>     | centrosomal protein 192                    | <a href="#">Cep192</a>             | 1.053 | 0.888  | 0.403377  | 0.668494 |
| 5680 | 10530225 | <a href="#">NM_001081321</a>       | <a href="#">71521</a>     | PDS5, regulator of cohesion ma             | <a href="#">Pds5a</a>              | 1.053 | 0.892  | 0.401058  | 0.666661 |
| 5681 | 10386824 | <a href="#">NM_019921</a>          | <a href="#">56697</a>     | A kinase (PRKA) anchor protein             | <a href="#">Akap10</a>             | 1.053 | 1.44   | 0.19175   | 0.451028 |
| 5682 | 10509246 | <a href="#">NM_024452</a>          | <a href="#">269593</a>    | leucine zipper protein 1                   | <a href="#">Luzp1</a>              | 1.053 | 0.525  | 0.61516   | 0.822023 |
| 5683 | 10606876 | <a href="#">NM_019768</a>          | <a href="#">56397</a>     | mortality factor 4 like 2                  | <a href="#">Morf4l2</a>            | 1.053 | 0.996  | 0.351343  | 0.624637 |
| 5684 | 10381187 | <a href="#">NM_016920</a>          | <a href="#">11975</a>     | ATPase, H <sup>+</sup> transporting, lysos | <a href="#">Atp6v0a1</a>           | 1.053 | 0.43   | 0.679956  | 0.857866 |
| 5685 | 10572727 | <a href="#">ENSMUST00000053105</a> | <a href="#">382019</a>    | predicted gene, OTTMUSG0000002             | <a href="#">OTTMUSG00000022410</a> | 1.053 | -0.124 | 0.904416  | 0.962829 |
| 5686 | 10382912 | <a href="#">NM_001113486</a>       | <a href="#">53860</a>     | septin 9                                   | <a href="#">Sep9</a>               | 1.053 | 0.655  | 0.532715  | 0.766762 |
| 5687 | 10556169 | <a href="#">NM_025344</a>          | <a href="#">66085</a>     | eukaryotic translation initiat             | <a href="#">Eif3f</a>              | 1.052 | 0.427  | 0.681991  | 0.85946  |
| 5688 | 10488090 | <a href="#">NM_175225</a>          | <a href="#">75812</a>     | taspace, threonine aspartase 1             | <a href="#">Tasp1</a>              | 1.052 | 0.852  | 0.42164   | 0.683993 |
| 5689 | 10561561 | <a href="#">NM_009109</a>          | <a href="#">20190</a>     | ryanodine receptor 1, skeletal             | <a href="#">Ryr1</a>               | 1.052 | 1.269  | 0.243864  | 0.516956 |
| 5690 | 10560886 | <a href="#">NM_026862</a>          | <a href="#">68891</a>     | CD177 antigen                              | <a href="#">Cd177</a>              | 1.052 | 0.906  | 0.394187  | 0.661914 |
| 5691 | 10377804 | <a href="#">NM_145429</a>          | <a href="#">216869</a>    | arrestin, beta 2                           | <a href="#">Arrb2</a>              | 1.052 | 0.273  | 0.792688  | 0.91549  |
| 5692 | 10380773 | <a href="#">NM_021493</a>          | <a href="#">58996</a>     | RIKEN cDNA 4933428G20 gene                 | <a href="#">4933428G20Rik</a>      | 1.052 | 0.713  | 0.498291  | 0.742426 |
| 5693 | 10580219 | <a href="#">NM_007591</a>          | <a href="#">12317</a>     | calreticulin                               | <a href="#">Calr</a>               | 1.052 | 0.355  | 0.732511  | 0.885041 |
| 5694 | 10381664 |                                    |                           |                                            |                                    | 1.052 | 1.317  | 0.228139  | 0.499185 |
| 5695 | 10388045 |                                    |                           |                                            |                                    | 1.052 | -0.178 | 0.863389  | 0.945538 |
| 5696 | 10497944 | <a href="#">NM_028140</a>          | <a href="#">72175</a>     | major facilitator superfamily              | <a href="#">Mfsd8</a>              | 1.052 | 0.664  | 0.527088  | 0.762858 |
| 5697 | 10513544 | <a href="#">NM_009554</a>          | <a href="#">22696</a>     | zinc finger protein 37                     | <a href="#">Zfp37</a>              | 1.052 | 0.879  | 0.40749   | 0.671862 |
| 5698 | 10421806 | <a href="#">NM_001033215</a>       | <a href="#">105590</a>    | expressed sequence AU017455                | <a href="#">AU017455</a>           | 1.052 | 0.281  | 0.786529  | 0.912916 |
| 5699 | 10491363 | <a href="#">NM_024200</a>          | <a href="#">67414</a>     | mitofusin 1                                | <a href="#">Mfn1</a>               | 1.052 | 0.436  | 0.675642  | 0.855911 |
| 5700 | 10428453 | <a href="#">NM_001081391</a>       | <a href="#">239420</a>    | CUB and Sushi multiple domains             | <a href="#">Csmc3</a>              | 1.052 | 0.673  | 0.521769  | 0.75888  |
| 5701 | 10561799 | <a href="#">NM_178384</a>          | <a href="#">72723</a>     | zinc finger protein 74                     | <a href="#">Zfp74</a>              | 1.052 | 0.727  | 0.490367  | 0.737313 |
| 5702 | 10408455 | <a href="#">NM_144536</a>          | <a href="#">68916</a>     | CDK5 regulatory subunit associ             | <a href="#">Cdkal1</a>             | 1.052 | 0.6    | 0.567063  | 0.792621 |
| 5703 | 10384179 |                                    |                           |                                            |                                    | 1.052 | 0.855  | 0.420065  | 0.68238  |
| 5704 | 10538352 |                                    |                           |                                            |                                    | 1.052 | 2.076  | 0.0754063 | 0.259639 |
| 5705 | 10366399 | <a href="#">AK143218</a>           | <a href="#">544737</a>    | hypothetical LOC544737                     | <a href="#">LOC544737</a>          | 1.052 | 0.526  | 0.614945  | 0.821845 |
| 5706 | 10379075 | <a href="#">NM_001002004</a>       | <a href="#">72503</a>     | RIKEN cDNA 2610507B11 gene                 | <a href="#">2610507B11Rik</a>      | 1.052 | 0.576  | 0.581837  | 0.800451 |
| 5707 | 10488387 | <a href="#">NM_019632</a>          | <a href="#">17957</a>     | N-ethylmaleimide sensitive fus             | <a href="#">Napb</a>               | 1.052 | 0.877  | 0.408854  | 0.673168 |
| 5708 | 10471784 | <a href="#">NM_146121</a>          | <a href="#">227800</a>    | RAB GTPase activating protein              | <a href="#">Rabgap1</a>            | 1.052 | 0.49   | 0.638939  | 0.835923 |
| 5709 | 10603302 |                                    |                           |                                            |                                    | 1.052 | 0.944  | 0.37571   | 0.645773 |
| 5710 | 10426645 | <a href="#">AK080921</a>           | <a href="#">320551</a>    | RIKEN cDNA B430209F14 gene                 | <a href="#">B430209F14Rik</a>      | 1.052 | 0.55   | 0.599025  | 0.811784 |
| 5711 | 10577824 | <a href="#">NM_173012</a>          | <a href="#">270035</a>    | leucine zipper-EF-hand contain             | <a href="#">Letm2</a>              | 1.052 | 0.752  | 0.475743  | 0.727129 |
| 5712 | 10425987 | <a href="#">NM_011144</a>          | <a href="#">19013</a>     | peroxisome proliferator activa             | <a href="#">Ppara</a>              | 1.052 | 0.907  | 0.393917  | 0.661714 |
| 5713 | 10506754 | <a href="#">NM_146255</a>          | <a href="#">242607</a>    | solute carrier family 1 (gluta             | <a href="#">Slc1a7</a>             | 1.052 | 1.085  | 0.312827  | 0.589257 |
| 5714 | 10551483 | <a href="#">NM_198425</a>          | <a href="#">386655</a>    | EP300 interacting inhibitor of             | <a href="#">Eid2</a>               | 1.052 | 0.5    | 0.632146  | 0.832782 |
| 5715 | 10584405 | <a href="#">NM_146869</a>          | <a href="#">258869</a>    | olfactory receptor 147                     | <a href="#">Olfr147</a>            | 1.052 | 0.705  | 0.503165  | 0.745637 |
| 5716 | 10551061 | <a href="#">NM_175477</a>          | <a href="#">232976</a>    | zinc finger protein 574                    | <a href="#">Zfp574</a>             | 1.052 | 0.482  | 0.644368  | 0.839103 |

|      |          |                                    |                           |                                |                                    |       |       |          |          |
|------|----------|------------------------------------|---------------------------|--------------------------------|------------------------------------|-------|-------|----------|----------|
| 5717 | 10585588 | <a href="#">NM_139001</a>          | <a href="#">121021</a>    | chondroitin sulfate proteoglyc | <a href="#">Cspg4</a>              | 1.052 | 0.809 | 0.444183 | 0.702635 |
| 5718 | 10460400 | <a href="#">NM_008797</a>          | <a href="#">18563</a>     | pyruvate carboxylase           | <a href="#">Pcx</a>                | 1.052 | 0.827 | 0.434887 | 0.695306 |
| 5719 | 10453900 | <a href="#">NM_024182</a>          | <a href="#">66878</a>     | RIO kinase 3 (yeast)           | <a href="#">Riok3</a>              | 1.052 | 0.451 | 0.665012 | 0.850739 |
| 5720 | 10381049 | <a href="#">NM_001080925</a>       | <a href="#">268480</a>    | Rap guanine nucleotide exchang | <a href="#">Rapgef11</a>           | 1.052 | 0.58  | 0.579818 | 0.799181 |
| 5721 | 10380871 | <a href="#">NM_021547</a>          | <a href="#">59045</a>     | START domain containing 3      | <a href="#">Stard3</a>             | 1.052 | 0.761 | 0.470626 | 0.722494 |
| 5722 | 10477206 | <a href="#">NM_001081044</a>       | <a href="#">228785</a>    | myosin, light polypeptide kina | <a href="#">Mylk2</a>              | 1.052 | 1.012 | 0.344178 | 0.618503 |
| 5723 | 10516303 |                                    |                           |                                |                                    | 1.051 | 0.414 | 0.691203 | 0.864526 |
| 5724 | 10411019 | <a href="#">NM_010829</a>          | <a href="#">17686</a>     | mutS homolog 3 (E. coli)       | <a href="#">Msh3</a>               | 1.051 | 0.479 | 0.646384 | 0.840589 |
| 5725 | 10558239 | <a href="#">NM_008257</a>          | <a href="#">15373</a>     | H6 homeo box 3                 | <a href="#">Hmx3</a>               | 1.051 | 0.988 | 0.355087 | 0.627756 |
| 5726 | 10581612 | <a href="#">NM_020046</a>          | <a href="#">56749</a>     | dihydroorotate dehydrogenase   | <a href="#">Dhodh</a>              | 1.051 | 0.574 | 0.583175 | 0.801264 |
| 5727 | 10359793 | <a href="#">NM_001033344</a>       | <a href="#">240892</a>    | dual specificity phosphatase 2 | <a href="#">Dusp27</a>             | 1.051 | 1.468 | 0.184375 | 0.441948 |
| 5728 | 10481147 | <a href="#">NM_011512</a>          | <a href="#">20932</a>     | surfeit gene 4                 | <a href="#">Surf4</a>              | 1.051 | 0.197 | 0.849209 | 0.939006 |
| 5729 | 10404152 | <a href="#">NM_029679</a>          | <a href="#">193385</a>    | RIKEN cDNA 6330500D04 gene     | <a href="#">6330500D04Rik</a>      | 1.051 | 1.051 | 0.327019 | 0.6032   |
| 5730 | 10584862 | <a href="#">NM_001013390</a>       | <a href="#">399548</a>    | sodium channel, type IV, beta  | <a href="#">Scn4b</a>              | 1.051 | 1.174 | 0.27787  | 0.553005 |
| 5731 | 10578763 | <a href="#">NM_021788</a>          | <a href="#">60406</a>     | sin3 associated polypeptide    | <a href="#">Sap30</a>              | 1.051 | 0.542 | 0.604174 | 0.815116 |
| 5732 | 10472277 | <a href="#">NM_020575</a>          | <a href="#">57438</a>     | membrane-associated ring finge | <a href="#">March7</a>             | 1.051 | 0.379 | 0.715955 | 0.875442 |
| 5733 | 10362922 | <a href="#">NM_053069</a>          | <a href="#">11793</a>     | autophagy-related 5 (yeast)    | <a href="#">Atg5</a>               | 1.051 | 0.58  | 0.579397 | 0.798942 |
| 5734 | 10605510 |                                    |                           |                                |                                    | 1.051 | 0.717 | 0.49583  | 0.740541 |
| 5735 | 10492469 | <a href="#">NM_001039543</a>       | <a href="#">17349</a>     | myeloid leukemia factor 1      | <a href="#">Mlf1</a>               | 1.051 | 0.35  | 0.736661 | 0.887367 |
| 5736 | 10386916 | <a href="#">BC053455</a>           | <a href="#">192976</a>    | cDNA sequence BC046404         | <a href="#">BC046404</a>           | 1.051 | 0.835 | 0.430726 | 0.691411 |
| 5737 | 10564805 | <a href="#">NM_011068</a>          | <a href="#">18631</a>     | peroxisomal biogenesis factor  | <a href="#">Pex11a</a>             | 1.051 | 0.371 | 0.721097 | 0.878601 |
| 5738 | 10565735 | <a href="#">ENSMUST00000069035</a> | <a href="#">233544</a>    | RIKEN cDNA A630091E08 gene     | <a href="#">A630091E08Rik</a>      | 1.051 | 1.198 | 0.268789 | 0.543335 |
| 5739 | 10493809 | <a href="#">XM_910611</a>          | <a href="#">628324</a>    | predicted gene, EG628324       | <a href="#">EG628324</a>           | 1.051 | 1.01  | 0.345048 | 0.619061 |
| 5740 | 10487000 | <a href="#">NM_001013829</a>       | <a href="#">435684</a>    | Src homology 2 domain containi | <a href="#">Shf</a>                | 1.051 | 0.931 | 0.382019 | 0.651575 |
| 5741 | 10420426 | <a href="#">BC117501</a>           | <a href="#">219114</a>    | RIKEN cDNA F630043A04 gene     | <a href="#">F630043A04Rik</a>      | 1.051 | 0.085 | 0.934764 | 0.974011 |
| 5742 | 10454212 | <a href="#">NM_008586</a>          | <a href="#">17288</a>     | meprin 1 beta                  | <a href="#">Mep1b</a>              | 1.051 | 1.467 | 0.184702 | 0.442299 |
| 5743 | 10526195 | <a href="#">NM_053266</a>          | <a href="#">114674</a>    | GTF2I repeat domain containing | <a href="#">Gtf2ird2</a>           | 1.051 | 0.689 | 0.51229  | 0.752788 |
| 5744 | 10366886 | <a href="#">NM_146011</a>          | <a href="#">216445</a>    | Rho GTPase activating protein  | <a href="#">Arhgap9</a>            | 1.051 | 0.557 | 0.594147 | 0.808459 |
| 5745 | 10419854 | <a href="#">NM_016972</a>          | <a href="#">50934</a>     | solute carrier family 7 (catio | <a href="#">Slc7a8</a>             | 1.051 | 0.432 | 0.678377 | 0.857067 |
| 5746 | 10438815 | <a href="#">NM_177718</a>          | <a href="#">239796</a>    | RIKEN cDNA 1600021P15 gene     | <a href="#">1600021P15Rik</a>      | 1.051 | 0.546 | 0.601534 | 0.813172 |
| 5747 | 10463277 | <a href="#">NM_008699</a>          | <a href="#">18089</a>     | NK2 transcription factor relat | <a href="#">Nkx2-3</a>             | 1.051 | 0.534 | 0.609135 | 0.818061 |
| 5748 | 10458997 | <a href="#">AK029420</a>           | <a href="#">73137</a>     | proline-rich coiled-coil 1     | <a href="#">Prrc1</a>              | 1.051 | 0.883 | 0.405573 | 0.670072 |
| 5749 | 10395225 | <a href="#">ENSMUST00000101498</a> | <a href="#">100038387</a> | predicted gene, ENSMUSG0000007 | <a href="#">ENSMUSG00000073133</a> | 1.051 | 0.36  | 0.729191 | 0.882693 |
| 5750 | 10404187 | <a href="#">NM_019551</a>          | <a href="#">56196</a>     | Traf and Tnf receptor associat | <a href="#">Ttrap</a>              | 1.051 | 0.425 | 0.682915 | 0.859827 |
| 5751 | 10594161 | <a href="#">NM_019927</a>          | <a href="#">23806</a>     | ariadne ubiquitin-conjugating  | <a href="#">Arih1</a>              | 1.051 | 0.897 | 0.398726 | 0.664967 |
| 5752 | 10473690 | <a href="#">NM_018828</a>          | <a href="#">55935</a>     | formin binding protein 4       | <a href="#">Fnbp4</a>              | 1.051 | 0.87  | 0.412123 | 0.676023 |
| 5753 | 10360418 | <a href="#">NM_011880</a>          | <a href="#">24012</a>     | regulator of G protein signali | <a href="#">Rgs7</a>               | 1.051 | 0.506 | 0.627639 | 0.830619 |
| 5754 | 10479971 | <a href="#">ENSMUST00000100426</a> | <a href="#">100038708</a> | predicted gene, ENSMUSG0000007 | <a href="#">ENSMUSG00000075538</a> | 1.051 | 0.322 | 0.75663  | 0.897871 |
| 5755 | 10490378 | <a href="#">NM_133849</a>          | <a href="#">99296</a>     | histamine receptor H3          | <a href="#">Hrh3</a>               | 1.051 | 1.003 | 0.348523 | 0.622153 |
| 5756 | 10515737 | <a href="#">ENSMUST00000075406</a> | <a href="#">230676</a>    | cDNA sequence BC059842         | <a href="#">BC059842</a>           | 1.051 | 0.69  | 0.511971 | 0.75265  |
| 5757 | 10601901 | <a href="#">BC117076</a>           | <a href="#">69389</a>     | RIKEN cDNA 1700014N06 gene     | <a href="#">1700014N06Rik</a>      | 1.051 | 0.765 | 0.468308 | 0.720616 |
| 5758 | 10492774 | <a href="#">ENSMUST00000116329</a> | <a href="#">229459</a>    | dachsous 2 (Drosophila)        | <a href="#">Dehs2</a>              | 1.051 | 0.974 | 0.361718 | 0.633386 |
| 5759 | 10510580 | <a href="#">NM_011612</a>          | <a href="#">21942</a>     | tumor necrosis factor receptor | <a href="#">Tnfrsf9</a>            | 1.051 | 0.47  | 0.652024 | 0.844083 |
| 5760 | 10385832 | <a href="#">NM_021283</a>          | <a href="#">16189</a>     | interleukin 4                  | <a href="#">Il4</a>                | 1.051 | 0.61  | 0.56067  | 0.78784  |
| 5761 | 10505044 | <a href="#">NM_139309</a>          | <a href="#">246179</a>    | fukutin                        | <a href="#">Fktn</a>               | 1.051 | 0.378 | 0.716586 | 0.875798 |
| 5762 | 10433114 | <a href="#">NM_010577</a>          | <a href="#">16402</a>     | integrin alpha 5 (fibronectin  | <a href="#">Itga5</a>              | 1.051 | 0.41  | 0.693736 | 0.865705 |
| 5763 | 10513020 | <a href="#">NM_026079</a>          | <a href="#">230233</a>    | inhibitor of kappa light polyp | <a href="#">Ikkkap</a>             | 1.051 | 0.74  | 0.482701 | 0.731472 |
| 5764 | 10512637 | <a href="#">NM_019475</a>          | <a href="#">100040268</a> | olfactory receptor 157         | <a href="#">Olfr157</a>            | 1.051 | 1.046 | 0.329212 | 0.605502 |
| 5765 | 10450564 | <a href="#">NM_010364</a>          | <a href="#">14885</a>     | general transcription factor I | <a href="#">Gtf2h4</a>             | 1.051 | 0.595 | 0.569723 | 0.794081 |
| 5766 | 10476538 | <a href="#">NM_145534</a>          | <a href="#">228662</a>    | BTB (POZ) domain containing 3  | <a href="#">Btbd3</a>              | 1.051 | 0.453 | 0.66408  | 0.850267 |
| 5767 | 10466771 | <a href="#">NM_008044</a>          | <a href="#">14297</a>     | frataxin                       | <a href="#">Fxn</a>                | 1.051 | -0.02 | 0.984944 | 0.993638 |
| 5768 | 10405139 | <a href="#">NM_001033400</a>       | <a href="#">328250</a>    | gene model 806, (NCBI)         | <a href="#">Gm806</a>              | 1.051 | 0.69  | 0.511736 | 0.752549 |

|      |          |                                    |                           |                                |                                    |       |        |           |          |
|------|----------|------------------------------------|---------------------------|--------------------------------|------------------------------------|-------|--------|-----------|----------|
| 5769 | 10451650 | <a href="#">NM_001110832</a>       | <a href="#">18044</a>     | nuclear transcription factor-Y | <a href="#">Nfya</a>               | 1.051 | 1.018  | 0.341685  | 0.616255 |
| 5770 | 10525313 | <a href="#">NM_009125</a>          | <a href="#">20239</a>     | ataxin 2                       | <a href="#">Atxn2</a>              | 1.05  | 0.598  | 0.568173  | 0.793228 |
| 5771 | 10395520 | <a href="#">NM_053122</a>          | <a href="#">93757</a>     | IMP2 inner mitochondrial membr | <a href="#">Immp2l</a>             | 1.05  | 0.157  | 0.879664  | 0.952313 |
| 5772 | 10468893 | <a href="#">NM_009970</a>          | <a href="#">12982</a>     | colony stimulating factor 2 re | <a href="#">Csf2ra</a>             | 1.05  | 0.978  | 0.359636  | 0.631626 |
| 5773 | 10475080 | <a href="#">NM_011941</a>          | <a href="#">26390</a>     | mitogen-activated protein kina | <a href="#">Mapkbp1</a>            | 1.05  | 0.792  | 0.453379  | 0.709874 |
| 5774 | 10585268 | <a href="#">NM_019493</a>          | <a href="#">56057</a>     | B-cell translocation gene 4    | <a href="#">Btg4</a>               | 1.05  | 0.748  | 0.47833   | 0.728924 |
| 5775 | 10375439 | <a href="#">NM_025426</a>          | <a href="#">66213</a>     | mediator complex subunit 7     | <a href="#">Med7</a>               | 1.05  | 0.426  | 0.682773  | 0.859827 |
| 5776 | 10575142 | <a href="#">ENSMUST00000093178</a> | <a href="#">100049570</a> | predicted gene, ENSMUSG0000007 | <a href="#">ENSMUSG00000074106</a> | 1.05  | 0.248  | 0.810989  | 0.923749 |
| 5777 | 10383758 | <a href="#">NR_002321</a>          | <a href="#">544752</a>    | taurine upregulated gene 1     | <a href="#">Tug1</a>               | 1.05  | 1.083  | 0.313641  | 0.59037  |
| 5778 | 10548176 | <a href="#">BC027368</a>           | <a href="#">72440</a>     | RIKEN cDNA 5930416119 gene     | <a href="#">5930416119Rik</a>      | 1.05  | 0.484  | 0.64284   | 0.838239 |
| 5779 | 10408613 | <a href="#">NM_023716</a>          | <a href="#">73710</a>     | tubulin, beta 2b               | <a href="#">Tubb2b</a>             | 1.05  | 0.209  | 0.840473  | 0.935549 |
| 5780 | 10418720 | <a href="#">NM_025907</a>          | <a href="#">67011</a>     | methyltransferase like 6       | <a href="#">Mettl6</a>             | 1.05  | 0.483  | 0.643142  | 0.838317 |
| 5781 | 10419736 | <a href="#">NM_010015</a>          | <a href="#">13135</a>     | defender against cell death 1  | <a href="#">Dad1</a>               | 1.05  | 0.445  | 0.669342  | 0.852821 |
| 5782 | 10389752 | <a href="#">NM_008711</a>          | <a href="#">18121</a>     | noggin                         | <a href="#">Nog</a>                | 1.05  | 0.497  | 0.633825  | 0.833492 |
| 5783 | 10480725 | <a href="#">BC029214</a>           | <a href="#">227622</a>    | cDNA sequence BC029214         | <a href="#">BC029214</a>           | 1.05  | 0.713  | 0.498391  | 0.742426 |
| 5784 | 10594447 | <a href="#">NM_008927</a>          | <a href="#">26395</a>     | mitogen-activated protein kina | <a href="#">Map2k1</a>             | 1.05  | -0.073 | 0.94353   | 0.977948 |
| 5785 | 10497343 | <a href="#">XM_001477158</a>       | <a href="#">100041785</a> | similar to cytochrome c oxidas | <a href="#">LOC100041785</a>       | 1.05  | 0.732  | 0.487174  | 0.734936 |
| 5786 | 10416505 | <a href="#">NM_026214</a>          | <a href="#">67516</a>     | potassium channel tetramerisat | <a href="#">Kctd4</a>              | 1.05  | 0.741  | 0.482134  | 0.730954 |
| 5787 | 10433274 | <a href="#">NM_139307</a>          | <a href="#">246154</a>    | vasorin                        | <a href="#">Vasn</a>               | 1.05  | 0.413  | 0.691694  | 0.864682 |
| 5788 | 10413596 | <a href="#">ENSMUST00000054230</a> | <a href="#">54650</a>     | Scm-like with four mbt domains | <a href="#">Sfmbt1</a>             | 1.05  | 0.78   | 0.460126  | 0.714915 |
| 5789 | 10406676 | <a href="#">NM_172589</a>          | <a href="#">218454</a>    | lipoma HMGIC fusion partner-li | <a href="#">Lhfp12</a>             | 1.05  | 0.281  | 0.786785  | 0.91293  |
| 5790 | 10534343 | <a href="#">NM_007925</a>          | <a href="#">13717</a>     | elastin                        | <a href="#">Eln</a>                | 1.05  | 1.228  | 0.257925  | 0.531958 |
| 5791 | 10400628 |                                    |                           |                                |                                    | 1.05  | 0.881  | 0.40685   | 0.671343 |
| 5792 | 10598409 | <a href="#">NM_172472</a>          | <a href="#">209446</a>    | transcription factor E3        | <a href="#">Tefe3</a>              | 1.05  | 0.537  | 0.607292  | 0.817143 |
| 5793 | 10490350 | <a href="#">NM_001085501</a>       | <a href="#">228966</a>    | protein phosphatase 1, regulat | <a href="#">Ppp1r3d</a>            | 1.05  | 1.964  | 0.0890145 | 0.287785 |
| 5794 | 10404898 | <a href="#">BC064117</a>           | <a href="#">380842</a>    | gene model 1574, (NCBI)        | <a href="#">Gm1574</a>             | 1.05  | 0.816  | 0.440423  | 0.699331 |
| 5795 | 10425999 | <a href="#">NM_001033337</a>       | <a href="#">239570</a>    | expressed sequence AW124722    | <a href="#">AW124722</a>           | 1.05  | 0.965  | 0.365791  | 0.636847 |
| 5796 | 10594590 | <a href="#">NM_019727</a>          | <a href="#">56440</a>     | sorting nexin 1                | <a href="#">Snx1</a>               | 1.05  | -0.131 | 0.899389  | 0.960245 |
| 5797 | 10591632 | <a href="#">NM_177030</a>          | <a href="#">319899</a>    | dedicator of cytokinesis 6     | <a href="#">Dock6</a>              | 1.05  | 0.741  | 0.482236  | 0.730954 |
| 5798 | 10543725 | <a href="#">NM_031998</a>          | <a href="#">83922</a>     | testis specific gene A14       | <a href="#">Tsga14</a>             | 1.05  | 0.124  | 0.904635  | 0.96288  |
| 5799 | 10605552 |                                    |                           |                                |                                    | 1.05  | 0.635  | 0.545004  | 0.77708  |
| 5800 | 10449697 | <a href="#">ENSMUST00000065610</a> | <a href="#">791325</a>    | predicted gene, ENSMUSG0000005 | <a href="#">ENSMUSG00000053280</a> | 1.05  | 0.173  | 0.867365  | 0.946934 |
| 5801 | 10357788 | <a href="#">AK084736</a>           | <a href="#">108954</a>    | protein phosphatase 1, regulat | <a href="#">Ppp1r15b</a>           | 1.05  | 1.263  | 0.245723  | 0.518859 |
| 5802 | 10504654 |                                    |                           |                                |                                    | 1.05  | 1.507  | 0.174248  | 0.427214 |
| 5803 | 10416923 |                                    |                           |                                |                                    | 1.05  | 0.448  | 0.667322  | 0.851505 |
| 5804 | 10429426 | <a href="#">AK132992</a>           | <a href="#">268816</a>    | gene model 628, (NCBI)         | <a href="#">Gm628</a>              | 1.05  | 1.682  | 0.135171  | 0.370646 |
| 5805 | 10480406 |                                    |                           |                                |                                    | 1.05  | 1.268  | 0.2443    | 0.51746  |
| 5806 | 10552339 | <a href="#">NM_001105057</a>       | <a href="#">637898</a>    | vomeronal 2, receptor 60       | <a href="#">Vmn2r60</a>            | 1.05  | 1.231  | 0.257099  | 0.531457 |
| 5807 | 10411105 | <a href="#">ENSMUST00000099317</a> | <a href="#">100038731</a> | predicted gene, ENSMUSG0000007 | <a href="#">ENSMUSG00000074772</a> | 1.05  | 1.32   | 0.227092  | 0.497889 |
| 5808 | 10471770 | <a href="#">NM_146623</a>          | <a href="#">258616</a>    | olfactory receptor 357         | <a href="#">Olfr357</a>            | 1.05  | 0.771  | 0.464998  | 0.71876  |
| 5809 | 10551487 | <a href="#">ENSMUST00000094651</a> | <a href="#">434156</a>    | similar to EID-2-like inhibito | <a href="#">LOC434156</a>          | 1.05  | 0.469  | 0.653107  | 0.844553 |
| 5810 | 10465379 | <a href="#">NM_026912</a>          | <a href="#">69024</a>     | sorting nexin 15               | <a href="#">Snx15</a>              | 1.05  | 0.881  | 0.40655   | 0.671151 |
| 5811 | 10503118 | <a href="#">BC055683</a>           | <a href="#">242297</a>    | RIKEN cDNA 1700012H17 gene     | <a href="#">1700012H17Rik</a>      | 1.05  | 0.633  | 0.546045  | 0.777637 |
| 5812 | 10524781 | <a href="#">NM_198163</a>          | <a href="#">77407</a>     | RAB35, member RAS oncogene fam | <a href="#">Rab35</a>              | 1.05  | 1.015  | 0.342899  | 0.617132 |
| 5813 | 10574137 |                                    |                           |                                |                                    | 1.05  | 1.101  | 0.306397  | 0.582911 |
| 5814 | 10447025 | <a href="#">NM_181649</a>          | <a href="#">53951</a>     | RIKEN cDNA 2310002B06 gene     | <a href="#">2310002B06Rik</a>      | 1.05  | 0.345  | 0.739648  | 0.889275 |
| 5815 | 10561983 | <a href="#">BC053749</a>           | <a href="#">333193</a>    | cDNA sequence BC053749         | <a href="#">BC053749</a>           | 1.05  | 0.506  | 0.628126  | 0.830847 |
| 5816 | 10485622 | <a href="#">NM_001123327</a>       | <a href="#">99003</a>     | glutamine and serine rich 1    | <a href="#">Qser1</a>              | 1.05  | 0.527  | 0.613727  | 0.821135 |
| 5817 | 10453139 | <a href="#">ENSMUST00000086549</a> | <a href="#">791338</a>    | predicted gene, ENSMUSG0000006 | <a href="#">ENSMUSG00000066938</a> | 1.05  | 0.996  | 0.351298  | 0.624608 |
| 5818 | 10525374 | <a href="#">NM_177242</a>          | <a href="#">320717</a>    | PTC7 protein phosphatase homol | <a href="#">Ptpc7</a>              | 1.049 | 0.674  | 0.521509  | 0.758794 |

|      |          |                                     |                           |                                |                               |       |        |          |          |
|------|----------|-------------------------------------|---------------------------|--------------------------------|-------------------------------|-------|--------|----------|----------|
| 5819 | 10457860 |                                     |                           |                                |                               | 1.049 | 0.646  | 0.538333 | 0.771226 |
| 5820 | 10381668 | <a href="#">NM_008707</a>           | <a href="#">18107</a>     | N-myristoyltransferase 1       | <a href="#">Nmt1</a>          | 1.049 | 0.042  | 0.967716 | 0.987137 |
| 5821 | 10421029 | <a href="#">NM_175384</a>           | <a href="#">108912</a>    | cell division cycle associated | <a href="#">Cdca2</a>         | 1.049 | 0.474  | 0.649798 | 0.842852 |
| 5822 | 10359027 | <a href="#">NM_010712</a>           | <a href="#">16872</a>     | LIM homeobox protein 4         | <a href="#">Lhx4</a>          | 1.049 | 0.769  | 0.466407 | 0.719571 |
| 5823 | 10576274 | <a href="#">NM_020497</a>           | <a href="#">57247</a>     | zinc finger protein (C2H2 type | <a href="#">Zfp276</a>        | 1.049 | 1.248  | 0.250936 | 0.524807 |
| 5824 | 10460492 | <a href="#">NM_025553</a>           | <a href="#">66419</a>     | mitochondrial ribosomal protei | <a href="#">Mrpl11</a>        | 1.049 | -0.038 | 0.970643 | 0.988127 |
| 5825 | 10437171 | <a href="#">ENSMUST00000023632</a>  | <a href="#">74296</a>     | RIKEN cDNA 1700093J21 gene     | <a href="#">1700093J21Rik</a> | 1.049 | 0.528  | 0.613513 | 0.82095  |
| 5826 | 10382779 | <a href="#">NR_004853</a>           | <a href="#">69681</a>     | cyclin-dependent kinase 3      | <a href="#">Cdk3</a>          | 1.049 | 0.901  | 0.396855 | 0.664116 |
| 5827 | 10364249 |                                     |                           |                                |                               | 1.049 | 0.465  | 0.655314 | 0.845667 |
| 5828 | 10381032 | <a href="#">NM_138660</a>           | <a href="#">192160</a>    | cancer susceptibility candidat | <a href="#">Casc3</a>         | 1.049 | 0.339  | 0.744583 | 0.891476 |
| 5829 | 10407892 | <a href="#">NM_001081058</a>        | <a href="#">69562</a>     | cell division cycle 2-like 5 ( | <a href="#">Cdc215</a>        | 1.049 | 0.457  | 0.660965 | 0.84894  |
| 5830 | 10531290 | <a href="#">NM_026557</a>           | <a href="#">68098</a>     | ring finger and CHY zinc finge | <a href="#">Rchy1</a>         | 1.049 | 0.112  | 0.914059 | 0.966102 |
| 5831 | 10384483 |                                     |                           |                                |                               | 1.049 | 1.111  | 0.302266 | 0.578434 |
| 5832 | 10390595 | <a href="#">NM_013634</a>           | <a href="#">19014</a>     | mediator complex subunit 1     | <a href="#">Med1</a>          | 1.049 | 1.09   | 0.310611 | 0.587176 |
| 5833 | 10586254 | <a href="#">ENSMUST00000038890</a>  | <a href="#">102442</a>    | DENN/MADD domain containing 4A | <a href="#">Dennd4a</a>       | 1.049 | -0.12  | 0.908127 | 0.963723 |
| 5834 | 10450814 | <a href="#">NM_029632</a>           | <a href="#">76497</a>     | protein phosphatase 1, regulat | <a href="#">Ppp1r11</a>       | 1.049 | -0.29  | 0.780071 | 0.910713 |
| 5835 | 10558192 | <a href="#">NM_175166</a>           | <a href="#">71395</a>     | RIKEN cDNA 5430419D17 gene     | <a href="#">5430419D17Rik</a> | 1.049 | 1.435  | 0.193235 | 0.452533 |
| 5836 | 10497904 | <a href="#">NM_153561</a>           | <a href="#">229228</a>    | nudix (nucleoside diphosphate  | <a href="#">Nudt6</a>         | 1.049 | 1.047  | 0.329018 | 0.605314 |
| 5837 | 10489463 | <a href="#">NM_011414</a>           | <a href="#">20568</a>     | secretory leukocyte peptidase  | <a href="#">Slpi</a>          | 1.049 | 0.978  | 0.359517 | 0.63155  |
| 5838 | 10448495 | <a href="#">BC072612</a>            | <a href="#">72016</a>     | RIKEN cDNA 1600002H07 gene     | <a href="#">1600002H07Rik</a> | 1.049 | 0.781  | 0.45992  | 0.714726 |
| 5839 | 10499216 | <a href="#">NM_028460</a>           | <a href="#">73182</a>     | platelet endothelial aggregati | <a href="#">Pear1</a>         | 1.049 | 0.715  | 0.497097 | 0.741437 |
| 5840 | 10375838 | <a href="#">NM_153393</a>           | <a href="#">237759</a>    | collagen, type XXIII, alpha 1  | <a href="#">Col23a1</a>       | 1.049 | 0.538  | 0.606531 | 0.816743 |
| 5841 | 10579125 | <a href="#">NM_145596</a>           | <a href="#">234366</a>    | GATA zinc finger domain contai | <a href="#">Gatad2a</a>       | 1.049 | 0.142  | 0.891112 | 0.957456 |
| 5842 | 10489429 | <a href="#">NM_145369</a>           | <a href="#">209232</a>    | WAP four-disulfide core domain | <a href="#">Wfdc5</a>         | 1.049 | 1.009  | 0.345669 | 0.619811 |
| 5843 | 10432372 | <a href="#">NM_007857</a>           | <a href="#">13363</a>     | desert hedgehog                | <a href="#">Dhh</a>           | 1.049 | 0.873  | 0.410726 | 0.675052 |
| 5844 | 10557315 |                                     |                           |                                |                               | 1.049 | 0.451  | 0.66556  | 0.850977 |
| 5845 | 10348697 | <a href="#">NM_177587</a>           | <a href="#">208760</a>    | aquaporin 12                   | <a href="#">Aqp12</a>         | 1.049 | 0.862  | 0.41641  | 0.67936  |
| 5846 | 10466972 | <a href="#">NM_177721</a>           | <a href="#">240614</a>    | RAN binding protein 6          | <a href="#">Ranbp6</a>        | 1.049 | 0.181  | 0.861485 | 0.944333 |
| 5847 | 10391990 | <a href="#">BC054752</a>            | <a href="#">76719</a>     | RIKEN cDNA 1700081L11 gene     | <a href="#">1700081L11Rik</a> | 1.049 | 0.918  | 0.38829  | 0.657011 |
| 5848 | 10487660 | <a href="#">NM_001114541</a>        | <a href="#">319513</a>    | RIKEN cDNA A930025D01 gene     | <a href="#">A930025D01Rik</a> | 1.049 | 0.63   | 0.548316 | 0.77872  |
| 5849 | 10604248 | <a href="#">NM_001033422</a>        | <a href="#">331401</a>    | THO complex 2                  | <a href="#">Thoc2</a>         | 1.049 | 0.705  | 0.502995 | 0.745637 |
| 5850 | 10416124 |                                     |                           |                                |                               | 1.049 | 0.864  | 0.415273 | 0.678399 |
| 5851 | 10353947 | <a href="#">NM_018872</a>           | <a href="#">56030</a>     | transmembrane protein 131      | <a href="#">Tmem131</a>       | 1.049 | 0.36   | 0.72919  | 0.882693 |
| 5852 | 10524676 | <a href="#">NM_025573</a>           | <a href="#">108014</a>    | splicing factor, arginine/seri | <a href="#">Sfrs9</a>         | 1.049 | 0.623  | 0.552249 | 0.782016 |
| 5853 | 10588294 | <a href="#">NM_176979</a>           | <a href="#">235559</a>    | topoisomerase (DNA) II beta bi | <a href="#">Topbp1</a>        | 1.049 | 0.561  | 0.591527 | 0.806868 |
| 5854 | 10569273 | <a href="#">NM_028308</a>           | <a href="#">101513</a>    | RIKEN cDNA 2700078K21 gene     | <a href="#">2700078K21Rik</a> | 1.049 | 0.027  | 0.979258 | 0.991782 |
| 5855 | 10589647 | <a href="#">NM_146227</a>           | <a href="#">235631</a>    | testes-specific protease 50    | <a href="#">Tsp50</a>         | 1.049 | 0.867  | 0.413905 | 0.677396 |
| 5856 | 10363701 |                                     |                           |                                |                               | 1.049 | 0.892  | 0.400932 | 0.666612 |
| 5857 | 10416375 | <a href="#">NM_026119</a>           | <a href="#">67381</a>     | mediator of RNA polymerase II  | <a href="#">Med4</a>          | 1.049 | 0.515  | 0.622265 | 0.827079 |
| 5858 | 10537227 | <a href="#">NM_197986</a>           | <a href="#">68487</a>     | transmembrane protein 140      | <a href="#">Tmem140</a>       | 1.049 | 0.804  | 0.446891 | 0.70468  |
| 5859 | 10380896 | <a href="#">NM_001003817</a>        | <a href="#">13866</a>     | v-erb-b2 erythroblastic leukem | <a href="#">ErbB2</a>         | 1.049 | 0.928  | 0.383214 | 0.65267  |
| 5860 | 10545379 | <a href="#">NM_138592</a>           | <a href="#">28035</a>     | ubiquitin specific peptidase 3 | <a href="#">Usp39</a>         | 1.049 | 0.194  | 0.851433 | 0.940193 |
| 5861 | 10462333 | <a href="#">NM_025950</a>           | <a href="#">67072</a>     | cell division cycle 37 homolog | <a href="#">Cdc3711</a>       | 1.049 | 0.351  | 0.735296 | 0.886784 |
| 5862 | 10559406 | <a href="#">NM_023524</a>           | <a href="#">69714</a>     | TCF3 (E2A) fusion partner      | <a href="#">Tfpt</a>          | 1.049 | 0.186  | 0.857391 | 0.942484 |
| 5863 | 10394936 | <a href="#">ENSMUST00000101540</a>  | <a href="#">100042641</a> | similar to development and dif | <a href="#">LOC100042641</a>  | 1.049 | 0.178  | 0.863975 | 0.945829 |
| 5864 | 10405853 | <a href="#">NM_178364</a>           | <a href="#">170936</a>    | zinc finger protein 369        | <a href="#">Zfp369</a>        | 1.049 | 0.105  | 0.919481 | 0.967948 |
| 5865 | 10494583 | <a href="#">NM_011342</a>           | <a href="#">20333</a>     | SEC22 vesicle trafficking prot | <a href="#">Sec22b</a>        | 1.048 | 0.773  | 0.464068 | 0.717953 |
| 5866 | 10524124 | <a href="#">NM_008146</a>           | <a href="#">269682</a>    | golgi autoantigen, golgin subf | <a href="#">Golga3</a>        | 1.048 | 0.722  | 0.493004 | 0.738773 |
| 5867 | 10560023 | <a href="#">NM_001033820</a>        | <a href="#">619331</a>    | zinc fingr protein 551         | <a href="#">Zfp551</a>        | 1.048 | 0.36   | 0.72917  | 0.882693 |
| 5868 | 10374762 | <a href="#">ENSMUST000000089614</a> | <a href="#">628586</a>    | predicted gene, EG628586       | <a href="#">EG628586</a>      | 1.048 | 0.747  | 0.478438 | 0.729035 |
| 5869 | 10439874 | <a href="#">NM_027046</a>           | <a href="#">69339</a>     | coiled-coil domain containing  | <a href="#">Ccdc54</a>        | 1.048 | 0.347  | 0.738348 | 0.888438 |
| 5870 | 10603328 | <a href="#">NM_138603</a>           | <a href="#">54638</a>     | coiled-coil domain containing  | <a href="#">Ccdc22</a>        | 1.048 | 1.063  | 0.321957 | 0.598721 |
| 5871 | 10408444 | <a href="#">NM_026206</a>           | <a href="#">67505</a>     | prolactin family 7 subfamily   | <a href="#">Prl7c1</a>        | 1.048 | 0.519  | 0.619283 | 0.82476  |

| 5872 | 10508217 | <a href="#">NM_023603</a>          | <a href="#">71514</a>  | splicing factor proline/glutam  | <a href="#">Sfpq</a>          | 1.048 | 1.035  | 0.334123 | 0.609656 |
|------|----------|------------------------------------|------------------------|---------------------------------|-------------------------------|-------|--------|----------|----------|
| 5873 | 10597103 | <a href="#">NM_133347</a>          | <a href="#">72831</a>  | DEAH (Asp-Glu-Ala-His) box pol  | <a href="#">Dhx30</a>         | 1.048 | 0.93   | 0.382662 | 0.652088 |
| 5874 | 10569227 | <a href="#">NM_181729</a>          | <a href="#">353328</a> | mucin 6, gastric                | <a href="#">Muc6</a>          | 1.048 | 0.971  | 0.362912 | 0.63431  |
| 5875 | 10408060 | <a href="#">NM_146540</a>          | <a href="#">258533</a> | olfactory receptor 1364         | <a href="#">Olfr1364</a>      | 1.048 | 0.483  | 0.643301 | 0.838436 |
| 5876 | 10411215 | <a href="#">NM_198408</a>          | <a href="#">12919</a>  | corticotropin releasing hormon  | <a href="#">Crhbp</a>         | 1.048 | 0.701  | 0.50515  | 0.747176 |
| 5877 | 10391863 | <a href="#">BC117072</a>           | <a href="#">328019</a> | RIKEN cDNA 4933400C05 gene      | <a href="#">4933400C05Rik</a> | 1.048 | 0.556  | 0.595326 | 0.809385 |
| 5878 | 10458784 | <a href="#">NM_172627</a>          | <a href="#">225467</a> | protein geranylgeranyltransfer  | <a href="#">Pgg1b</a>         | 1.048 | 0.347  | 0.738664 | 0.88853  |
| 5879 | 10388648 | <a href="#">NM_172945</a>          | <a href="#">268445</a> | ankyrin repeat domain 13b       | <a href="#">Ankrd13b</a>      | 1.048 | 1.01   | 0.345012 | 0.619054 |
| 5880 | 10434029 | <a href="#">NM_025808</a>          | <a href="#">66863</a>  | leucine-zipper-like transcript  | <a href="#">Lztr1</a>         | 1.048 | 0.655  | 0.532922 | 0.766954 |
| 5881 | 10604380 | <a href="#">NM_172465</a>          | <a href="#">208884</a> | zinc finger, DHHC domain conta  | <a href="#">Zdhc9</a>         | 1.048 | 0.281  | 0.786368 | 0.912868 |
| 5882 | 10390535 | <a href="#">NM_207231</a>          | <a href="#">217151</a> | ADP-ribosylation factor-like 5  | <a href="#">Arl5c</a>         | 1.048 | 1.323  | 0.226318 | 0.496985 |
| 5883 | 10391431 | <a href="#">NM_144829</a>          | <a href="#">69684</a>  | alanyl-tRNA synthetase domain   | <a href="#">Aarsd1</a>        | 1.048 | 0.473  | 0.650451 | 0.843233 |
| 5884 | 10520862 | <a href="#">NM_008037</a>          | <a href="#">14284</a>  | fos-like antigen 2              | <a href="#">Fosl2</a>         | 1.048 | 0.51   | 0.625053 | 0.829015 |
| 5885 | 10380321 | <a href="#">NM_134012</a>          | <a href="#">103537</a> | mbt domain containing 1         | <a href="#">Mbt1</a>          | 1.048 | 0.713  | 0.498533 | 0.742429 |
| 5886 | 10591947 | <a href="#">NM_025862</a>          | <a href="#">66948</a>  | acyl-Coenzyme A dehydrogenase   | <a href="#">Acad8</a>         | 1.048 | 0.304  | 0.769855 | 0.904792 |
| 5887 | 10507903 | <a href="#">ENSMUST00000097893</a> | <a href="#">108809</a> | RIKEN cDNA 4933407E24 gene      | <a href="#">4933407E24Rik</a> | 1.048 | 1.095  | 0.308718 | 0.585272 |
| 5888 | 10580752 | <a href="#">ENSMUST00000098492</a> | <a href="#">320377</a> | RIKEN cDNA 9330175E14 gene      | <a href="#">9330175E14Rik</a> | 1.048 | 0.858  | 0.418717 | 0.68129  |
| 5889 | 10373640 | <a href="#">NM_146929</a>          | <a href="#">258931</a> | olfactory receptor 807          | <a href="#">Olfr807</a>       | 1.048 | 0.808  | 0.444926 | 0.703375 |
| 5890 | 10351884 | <a href="#">NM_146717</a>          | <a href="#">258712</a> | olfactory receptor 433          | <a href="#">Olfr433</a>       | 1.048 | 0.734  | 0.485987 | 0.734018 |
| 5891 | 10560644 | <a href="#">NM_008990</a>          | <a href="#">19294</a>  | poliovirus receptor-related 2   | <a href="#">Pvr12</a>         | 1.048 | 0.277  | 0.78956  | 0.914414 |
| 5892 | 10416334 | <a href="#">NM_010071</a>          | <a href="#">13449</a>  | docking protein 2               | <a href="#">Dok2</a>          | 1.048 | 0.536  | 0.608052 | 0.817489 |
| 5893 | 10534883 | <a href="#">NM_010571</a>          | <a href="#">16369</a>  | insulin receptor substrate 3    | <a href="#">Irs3</a>          | 1.048 | 0.851  | 0.421877 | 0.68422  |
| 5894 | 10398398 |                                    |                        |                                 |                               | 1.048 | 0.451  | 0.665476 | 0.850921 |
| 5895 | 10535080 | <a href="#">NM_197980</a>          | <a href="#">68033</a>  | COX19 cytochrome c oxidase ass  | <a href="#">Cox19</a>         | 1.048 | -0.091 | 0.929913 | 0.972408 |
| 5896 | 10547288 | <a href="#">NM_001081112</a>       | <a href="#">232339</a> | ankyrin repeat domain 26        | <a href="#">Ankrd26</a>       | 1.048 | 0.753  | 0.47523  | 0.726714 |
| 5897 | 10348234 | <a href="#">NM_015750</a>          | <a href="#">23956</a>  | neuraminidase 2                 | <a href="#">Neu2</a>          | 1.048 | 1.14   | 0.290916 | 0.567082 |
| 5898 | 10396849 | <a href="#">NM_009014</a>          | <a href="#">19363</a>  | RAD51-like 1 (S. cerevisiae)    | <a href="#">Rad511</a>        | 1.048 | 0.371  | 0.721239 | 0.878601 |
| 5899 | 10561679 | <a href="#">NM_026545</a>          | <a href="#">57296</a>  | proteasome (prosome, macropain) | <a href="#">Psm8</a>          | 1.048 | 0.088  | 0.931922 | 0.97291  |
| 5900 | 10487927 | <a href="#">BC033429</a>           | <a href="#">70612</a>  | RIKEN cDNA 5730494N06 gene      | <a href="#">5730494N06Rik</a> | 1.048 | 0.412  | 0.692481 | 0.865136 |
| 5901 | 10402283 | <a href="#">NM_172584</a>          | <a href="#">217837</a> | inositol 1,3,4-triphosphate 5/  | <a href="#">Itpk1</a>         | 1.048 | 0.838  | 0.428718 | 0.689638 |
| 5902 | 10429201 | <a href="#">NM_020045</a>          | <a href="#">56748</a>  | NFU1 iron-sulfur cluster scaff  | <a href="#">Nfu1</a>          | 1.048 | 0.615  | 0.557353 | 0.785582 |
| 5903 | 10556178 | <a href="#">NM_021885</a>          | <a href="#">22144</a>  | probable candidate gene         | <a href="#">Fub</a>           | 1.048 | 0.712  | 0.4988   | 0.742429 |
| 5904 | 10414278 | <a href="#">ENSMUST00000100682</a> | <a href="#">76774</a>  | G protein-coupled receptor 137  | <a href="#">Gpr137c</a>       | 1.048 | 0.6    | 0.368836 | 0.792432 |
| 5905 | 10349752 | <a href="#">NM_007923</a>          | <a href="#">13714</a>  | ELK4, member of ETS oncogene f  | <a href="#">Elk4</a>          | 1.048 | 0.72   | 0.494061 | 0.739456 |
| 5906 | 10559590 | <a href="#">NM_207270</a>          | <a href="#">545902</a> | protein tyrosine phosphatase,   | <a href="#">Ptpnh</a>         | 1.048 | 0.969  | 0.364042 | 0.635449 |
| 5907 | 10443918 | <a href="#">NM_001045559</a>       | <a href="#">240067</a> | RIKEN cDNA C920016K16 gene      | <a href="#">C920016K16Rik</a> | 1.048 | 0.264  | 0.799439 | 0.919009 |
| 5908 | 10418718 |                                    |                        |                                 |                               | 1.048 | 1.215  | 0.262585 | 0.536954 |
| 5909 | 10399689 |                                    |                        |                                 |                               | 1.048 | 0.926  | 0.384193 | 0.653466 |
| 5910 | 10488362 | <a href="#">NM_023504</a>          | <a href="#">228731</a> | NK2 transcription factor relat  | <a href="#">Nkx2-4</a>        | 1.048 | 0.873  | 0.410857 | 0.675081 |
| 5911 | 10352735 | <a href="#">NM_178632</a>          | <a href="#">77065</a>  | integrator complex subunit 7    | <a href="#">Ints7</a>         | 1.048 | 0.583  | 0.57769  | 0.797824 |
| 5912 | 10526038 | <a href="#">NM_011846</a>          | <a href="#">23948</a>  | matrix metalloproteinase 17     | <a href="#">Mmp17</a>         | 1.048 | 1.088  | 0.311736 | 0.58828  |
| 5913 | 10381776 | <a href="#">NM_001038609</a>       | <a href="#">17762</a>  | microtubule-associated protein  | <a href="#">Mapt</a>          | 1.048 | 0.831  | 0.432648 | 0.693129 |
| 5914 | 10366409 | <a href="#">NM_001033261</a>       | <a href="#">216345</a> | coiled-coil domain containing   | <a href="#">Ccdc131</a>       | 1.048 | 0.816  | 0.440763 | 0.699766 |
| 5915 | 10367772 | <a href="#">NM_177271</a>          | <a href="#">320825</a> | sterile alpha motif domain con  | <a href="#">Samd5</a>         | 1.048 | 0.418  | 0.688408 | 0.862969 |
| 5916 | 10471761 | <a href="#">NM_146940</a>          | <a href="#">258942</a> | olfactory receptor 352          | <a href="#">Olfr352</a>       | 1.047 | 0.823  | 0.436701 | 0.696302 |
| 5917 | 10607646 | <a href="#">NM_001081052</a>       | <a href="#">195727</a> | Nance-Horan syndrome (human)    | <a href="#">Nhs</a>           | 1.047 | 1.495  | 0.177309 | 0.431715 |
| 5918 | 10460072 | <a href="#">NM_177450</a>          | <a href="#">338403</a> | carosine dipeptidase 1 (metal   | <a href="#">Cndp1</a>         | 1.047 | 1.12   | 0.298815 | 0.574899 |
| 5919 | 10514830 | <a href="#">NM_028209</a>          | <a href="#">72354</a>  | tetratricopeptide repeat domai  | <a href="#">Ttc4</a>          | 1.047 | 1.04   | 0.332071 | 0.608173 |
| 5920 | 10447649 | <a href="#">NM_001081416</a>       | <a href="#">68655</a>  | fibronectin type III domain co  | <a href="#">Fncl</a>          | 1.047 | 0.967  | 0.364635 | 0.635759 |
| 5921 | 10444312 | <a href="#">NM_079835</a>          | <a href="#">547431</a> | butyrophilin-like 2             | <a href="#">Btln2</a>         | 1.047 | 1.439  | 0.191992 | 0.451351 |
| 5922 | 10456346 | <a href="#">NM_025468</a>          | <a href="#">66286</a>  | SEC11 homolog C (S. cerevisiae) | <a href="#">Sec1c</a>         | 1.047 | 0.298  | 0.773973 | 0.906993 |

|      |          |                                    |                           |                                           |                                    |       |        |          |          |
|------|----------|------------------------------------|---------------------------|-------------------------------------------|------------------------------------|-------|--------|----------|----------|
| 5923 | 10539574 | <a href="#">NR_002702</a>          | <a href="#">108176</a>    | nucleoplasmin 3, pseudogene 1             | <a href="#">Npm3-ps1</a>           | 1.047 | 0.542  | 0.604205 | 0.815116 |
| 5924 | 10397244 | <a href="#">NM_025525</a>          | <a href="#">66381</a>     | ring finger protein 113A2                 | <a href="#">Rnf113a2</a>           | 1.047 | 0.719  | 0.494519 | 0.7396   |
| 5925 | 10518568 | <a href="#">XR_034527</a>          | <a href="#">666774</a>    | similar to ribosomal protein S            | <a href="#">LOC666774</a>          | 1.047 | 0.536  | 0.608115 | 0.817507 |
| 5926 | 10384808 | <a href="#">BC059020</a>           | <a href="#">320757</a>    | RIKEN cDNA A630052C17 gene                | <a href="#">A630052C17Rik</a>      | 1.047 | 0.403  | 0.698608 | 0.867883 |
| 5927 | 10488771 | <a href="#">NM_021546</a>          | <a href="#">56846</a>     | N-terminal EF-hand calcium bin            | <a href="#">Necab3</a>             | 1.047 | 0.921  | 0.386927 | 0.655964 |
| 5928 | 10494288 | <a href="#">NM_146133</a>          | <a href="#">229593</a>    | golgi phosphoprotein 3-like               | <a href="#">Golp3l</a>             | 1.047 | -0.182 | 0.86092  | 0.944057 |
| 5929 | 10385365 | <a href="#">NM_028185</a>          | <a href="#">72290</a>     | U7 snRNP-specific Sm-like prot            | <a href="#">Lsm1l</a>              | 1.047 | 0.244  | 0.813693 | 0.925035 |
| 5930 | 10412205 | <a href="#">ENSMUST00000099162</a> | <a href="#">100038414</a> | predicted gene, ENSMUSG0000007            | <a href="#">ENSMUSG00000074650</a> | 1.047 | 0.439  | 0.673268 | 0.854824 |
| 5931 | 10581175 | <a href="#">NM_178879</a>          | <a href="#">97440</a>     | expressed sequence C76566                 | <a href="#">C76566</a>             | 1.047 | 0.082  | 0.936718 | 0.975231 |
| 5932 | 10546586 | <a href="#">NM_001081111</a>       | <a href="#">232286</a>    | TATA element modulatory factor            | <a href="#">Tmf1</a>               | 1.047 | 0.382  | 0.713371 | 0.874578 |
| 5933 | 10549237 | <a href="#">NM_177222</a>          | <a href="#">320662</a>    | cancer susceptibility candidat            | <a href="#">Case1</a>              | 1.047 | 0.766  | 0.467775 | 0.720367 |
| 5934 | 10464551 | <a href="#">NM_144870</a>          | <a href="#">225887</a>    | NADH dehydrogenase (ubiquinone)           | <a href="#">Ndufs8</a>             | 1.047 | 0.057  | 0.956093 | 0.983285 |
| 5935 | 10450835 | <a href="#">NM_029747</a>          | <a href="#">76797</a>     | RIKEN cDNA 2410137M14 gene                | <a href="#">2410137M14Rik</a>      | 1.047 | 1.093  | 0.309672 | 0.586555 |
| 5936 | 10539669 | <a href="#">NM_013458</a>          | <a href="#">11519</a>     | adducin 2 (beta)                          | <a href="#">Add2</a>               | 1.047 | 0.52   | 0.618963 | 0.824608 |
| 5937 | 10556734 | <a href="#">NM_054094</a>          | <a href="#">117147</a>    | acyl-CoA synthetase medium-chain          | <a href="#">Acsm1</a>              | 1.047 | 0.581  | 0.578935 | 0.798552 |
| 5938 | 10561525 | <a href="#">ENSMUST00000098619</a> | <a href="#">100038382</a> | predicted gene, ENSMUSG0000007            | <a href="#">ENSMUSG00000074233</a> | 1.047 | 0.7    | 0.505806 | 0.747682 |
| 5939 | 10599187 | <a href="#">NM_028325</a>          | <a href="#">72693</a>     | zinc finger, CCHC domain conta            | <a href="#">Zcchc12</a>            | 1.047 | 0.71   | 0.499974 | 0.743107 |
| 5940 | 10596403 | <a href="#">AM748257</a>           | <a href="#">665033</a>    | predicted gene, EG665033                  | <a href="#">EG665033</a>           | 1.047 | 0.284  | 0.784177 | 0.912068 |
| 5941 | 10505908 | <a href="#">XM_890156</a>          | <a href="#">625574</a>    | similar to TGFB-induced factor            | <a href="#">LOC625574</a>          | 1.047 | 0.906  | 0.39402  | 0.661801 |
| 5942 | 10403680 | <a href="#">NM_194262</a>          | <a href="#">94246</a>     | AT rich interactive domain 4B             | <a href="#">Arid4b</a>             | 1.047 | 0.768  | 0.466876 | 0.719927 |
| 5943 | 10600953 | <a href="#">NM_010099</a>          | <a href="#">13607</a>     | ectodysplasin-A                           | <a href="#">Eda</a>                | 1.047 | 0.853  | 0.421    | 0.683426 |
| 5944 | 10546967 | <a href="#">NM_024206</a>          | <a href="#">110379</a>    | SEC13 homolog (S. cerevisiae)             | <a href="#">Sec13</a>              | 1.047 | 0.277  | 0.789816 | 0.914502 |
| 5945 | 10539873 | <a href="#">NM_008090</a>          | <a href="#">14461</a>     | GATA binding protein 2                    | <a href="#">Gata2</a>              | 1.047 | 1.297  | 0.234508 | 0.505653 |
| 5946 | 10388869 | <a href="#">NM_009395</a>          | <a href="#">21927</a>     | tumor necrosis factor, alpha-i            | <a href="#">Tnfaip1</a>            | 1.047 | 0.236  | 0.819901 | 0.928345 |
| 5947 | 10381383 |                                    |                           |                                           |                                    | 1.047 | 0.813  | 0.442332 | 0.700945 |
| 5948 | 10560045 | <a href="#">NM_009512</a>          | <a href="#">26459</a>     | solute carrier family 27 (fatty acid)     | <a href="#">Slc27a5</a>            | 1.047 | 0.95   | 0.372656 | 0.643093 |
| 5949 | 10552488 | <a href="#">NM_133712</a>          | <a href="#">69540</a>     | kallikrein related-peptidase 1            | <a href="#">Klk10</a>              | 1.047 | 0.777  | 0.462038 | 0.716594 |
| 5950 | 10509000 |                                    |                           |                                           |                                    | 1.047 | 0.432  | 0.678103 | 0.856961 |
| 5951 | 10552418 | <a href="#">NM_026695</a>          | <a href="#">110826</a>    | electron transferring flavopro            | <a href="#">Etfb</a>               | 1.047 | 0.157  | 0.879543 | 0.952231 |
| 5952 | 10450412 | <a href="#">NM_001033221</a>       | <a href="#">106722</a>    | expressed sequence AU023871               | <a href="#">AU023871</a>           | 1.047 | 0.262  | 0.800889 | 0.919467 |
| 5953 | 10468909 | <a href="#">NM_026866</a>          | <a href="#">68897</a>     | dispatched homolog 1 (Drosophila)         | <a href="#">Disp1</a>              | 1.047 | 0.675  | 0.520971 | 0.758585 |
| 5954 | 10458834 | <a href="#">NM_026217</a>          | <a href="#">67526</a>     | autophagy-related 12 (yeast)              | <a href="#">Atg12</a>              | 1.047 | 0.384  | 0.711983 | 0.87382  |
| 5955 | 10347210 | <a href="#">ENSMUST00000097699</a> | <a href="#">100038510</a> | predicted gene, OTTMUSG0000002            | <a href="#">OTTMUSG00000022136</a> | 1.047 | 1.071  | 0.318841 | 0.596082 |
| 5956 | 10423963 | <a href="#">NM_175009</a>          | <a href="#">223527</a>    | enhancer of yellow 2 homolog (Drosophila) | <a href="#">Eny2</a>               | 1.046 | 0.795  | 0.451852 | 0.708709 |
| 5957 | 10528622 | <a href="#">NM_080444</a>          | <a href="#">117590</a>    | ankyrin repeat and SOCS box-coiled-coil   | <a href="#">Asb10</a>              | 1.046 | 1.017  | 0.342077 | 0.61636  |
| 5958 | 10567498 | <a href="#">XM_355934</a>          | <a href="#">381917</a>    | dynein, axonemal, heavy chain             | <a href="#">Dnahc3</a>             | 1.046 | 0.873  | 0.410861 | 0.675081 |
| 5959 | 10398461 | <a href="#">NM_012023</a>          | <a href="#">26931</a>     | protein phosphatase 2, regulatory         | <a href="#">Ppp2r5c</a>            | 1.046 | 0.523  | 0.616823 | 0.823029 |
| 5960 | 10471677 | <a href="#">NM_001114124</a>       | <a href="#">69601</a>     | disabled homolog 2 (Drosophila)           | <a href="#">Dab2ip</a>             | 1.046 | 0.763  | 0.469449 | 0.721578 |
| 5961 | 10477090 | <a href="#">NM_024196</a>          | <a href="#">67231</a>     | TBC1 domain family, member 20             | <a href="#">Tbc1d20</a>            | 1.046 | 0.953  | 0.371411 | 0.64202  |
| 5962 | 10570356 | <a href="#">NM_172282</a>          | <a href="#">234076</a>    | transmembrane and coiled-coil domain      | <a href="#">Tmco3</a>              | 1.046 | 0.442  | 0.671507 | 0.854195 |
| 5963 | 10556280 | <a href="#">NM_009302</a>          | <a href="#">20947</a>     | SWA-70 protein                            | <a href="#">Swap70</a>             | 1.046 | 0.524  | 0.616214 | 0.822657 |
| 5964 | 10555089 | <a href="#">NM_001081267</a>       | <a href="#">233532</a>    | remodeling and spacing factor             | <a href="#">Rsf1</a>               | 1.046 | 0.419  | 0.687443 | 0.862174 |
| 5965 | 10495183 | <a href="#">NM_008418</a>          | <a href="#">16491</a>     | potassium voltage-gated channel           | <a href="#">Kcna3</a>              | 1.046 | 1.137  | 0.291732 | 0.567783 |
| 5966 | 10403081 | <a href="#">NM_146039</a>          | <a href="#">217935</a>    | WD repeat domain 60                       | <a href="#">Wdr60</a>              | 1.046 | 0.301  | 0.771889 | 0.905856 |
| 5967 | 10452701 | <a href="#">NM_028887</a>          | <a href="#">74355</a>     | SMC hinge domain containing 1             | <a href="#">Smchd1</a>             | 1.046 | 0.214  | 0.836416 | 0.933945 |
| 5968 | 10564646 | <a href="#">NM_001109753</a>       | <a href="#">64176</a>     | synaptic vesicle glycoprotein             | <a href="#">Sv2b</a>               | 1.046 | 0.259  | 0.803094 | 0.920071 |
| 5969 | 10367600 | <a href="#">NM_007956</a>          | <a href="#">13982</a>     | estrogen receptor 1 (alpha)               | <a href="#">Esr1</a>               | 1.046 | 0.979  | 0.359431 | 0.631475 |
| 5970 | 10409905 | <a href="#">NM_020284</a>          | <a href="#">56835</a>     | cathepsin R                               | <a href="#">Ctsr</a>               | 1.046 | 1.181  | 0.275003 | 0.549798 |
| 5971 | 10362495 | <a href="#">NM_009925</a>          | <a href="#">12813</a>     | collagen, type X, alpha 1                 | <a href="#">Col10a1</a>            | 1.046 | 0.964  | 0.366226 | 0.637219 |
| 5972 | 10566432 | <a href="#">NM_147069</a>          | <a href="#">259072</a>    | olfactory receptor 686                    | <a href="#">Olfr686</a>            | 1.046 | 1.087  | 0.311926 | 0.588349 |

|      |          |                                    |                           |                                 |                                    |       |       |          |          |
|------|----------|------------------------------------|---------------------------|---------------------------------|------------------------------------|-------|-------|----------|----------|
| 5973 | 10512057 |                                    |                           |                                 |                                    | 1.046 | 0.45  | 0.666115 | 0.851266 |
| 5974 | 10473874 | <a href="#">NM_023854</a>          | <a href="#">77038</a>     | ADP-ribosylation factor GTPase  | <a href="#">Arfgap2</a>            | 1.046 | 0.54  | 0.605321 | 0.815893 |
| 5975 | 10576924 | <a href="#">NM_176849</a>          | <a href="#">234023</a>    | arginine and glutamate rich 1   | <a href="#">Arglu1</a>             | 1.046 | 0.745 | 0.48008  | 0.729941 |
| 5976 | 10476874 | <a href="#">NM_008780</a>          | <a href="#">18503</a>     | paired box gene 1               | <a href="#">Pax1</a>               | 1.046 | 0.852 | 0.421667 | 0.683993 |
| 5977 | 10454993 | <a href="#">NM_080636</a>          | <a href="#">70791</a>     | histidyl-tRNA synthetase 2, mi  | <a href="#">Hars2</a>              | 1.046 | 0.276 | 0.790155 | 0.914502 |
| 5978 | 10375679 | <a href="#">NM_029745</a>          | <a href="#">76795</a>     | TBC1 domain family, member 9B   | <a href="#">Tbc1d9b</a>            | 1.046 | 0.378 | 0.716618 | 0.875798 |
| 5979 | 10604551 | <a href="#">NM_031388</a>          | <a href="#">83563</a>     | ubiquitin specific peptidase 2  | <a href="#">Usp26</a>              | 1.046 | 0.003 | 0.99735  | 0.999003 |
| 5980 | 10592886 | <a href="#">ENSMUST00000071166</a> | <a href="#">100126035</a> | predicted gene, ENSMUSG0000005  | <a href="#">ENSMUSG00000057559</a> | 1.046 | 0.268 | 0.795999 | 0.917149 |
| 5981 | 10354542 | <a href="#">NM_153556</a>          | <a href="#">227099</a>    | postmeiotic segregation increa  | <a href="#">Pms1</a>               | 1.046 | 0.981 | 0.358379 | 0.630567 |
| 5982 | 10544084 | <a href="#">NM_172467</a>          | <a href="#">209032</a>    | zinc finger CCCH-type, antivir  | <a href="#">Zc3hav11</a>           | 1.046 | 0.914 | 0.390348 | 0.658911 |
| 5983 | 10496892 | <a href="#">NM_057172</a>          | <a href="#">51886</a>     | far upstream element (FUSE) bi  | <a href="#">Fubp1</a>              | 1.046 | 1.197 | 0.269114 | 0.543784 |
| 5984 | 10487690 | <a href="#">NM_080562</a>          | <a href="#">140629</a>    | U box domain containing 5       | <a href="#">Ubox5</a>              | 1.046 | 0.684 | 0.515472 | 0.754997 |
| 5985 | 10389601 | <a href="#">BC020005</a>           | <a href="#">74133</a>     | RIKEN cDNA 1200011M11 gene      | <a href="#">1200011M11Rik</a>      | 1.046 | 0.137 | 0.894535 | 0.958419 |
| 5986 | 10346323 | <a href="#">NM_175439</a>          | <a href="#">212679</a>    | methionine-tRNA synthetase 2 (  | <a href="#">Mars2</a>              | 1.046 | 0.657 | 0.53162  | 0.765811 |
| 5987 | 10400350 | <a href="#">NM_007688</a>          | <a href="#">12632</a>     | cofilin 2, muscle               | <a href="#">Cfl2</a>               | 1.046 | 0.389 | 0.708396 | 0.872343 |
| 5988 | 10411082 | <a href="#">NM_011582</a>          | <a href="#">21828</a>     | thrombospondin 4                | <a href="#">Thbs4</a>              | 1.046 | 1.322 | 0.226471 | 0.497144 |
| 5989 | 10357944 | <a href="#">NM_001081307</a>       | <a href="#">329251</a>    | protein phosphatase 1, regulat  | <a href="#">Ppp1r12b</a>           | 1.046 | 0.819 | 0.439118 | 0.698413 |
| 5990 | 10539119 | <a href="#">NM_019802</a>          | <a href="#">56316</a>     | gamma-glutamyl carboxylase      | <a href="#">Ggcx</a>               | 1.046 | 0.518 | 0.620183 | 0.825285 |
| 5991 | 10515257 | <a href="#">NM_009015</a>          | <a href="#">19366</a>     | RAD54 like (S. cerevisiae)      | <a href="#">Rad54l</a>             | 1.046 | 0.371 | 0.721189 | 0.878601 |
| 5992 | 10574087 | <a href="#">NM_022331</a>          | <a href="#">64209</a>     | homocysteine-inducible, endopl  | <a href="#">Herpud1</a>            | 1.046 | 0.376 | 0.717848 | 0.876794 |
| 5993 | 10486119 | <a href="#">NM_177568</a>          | <a href="#">18796</a>     | phospholipase C, beta 2         | <a href="#">Plcb2</a>              | 1.046 | 1.264 | 0.245425 | 0.518491 |
| 5994 | 10455769 | <a href="#">NM_152809</a>          | <a href="#">70425</a>     | casein kinase 1, gamma 3        | <a href="#">Csnk1g3</a>            | 1.046 | 0.314 | 0.762233 | 0.901088 |
| 5995 | 10375817 | <a href="#">ENSMUST00000074198</a> | <a href="#">622699</a>    | hypothetical LOC622699          | <a href="#">LOC622699</a>          | 1.046 | 1.025 | 0.338595 | 0.614159 |
| 5996 | 10489660 | <a href="#">NM_207706</a>          | <a href="#">140579</a>    | engulfment and cell motility 2  | <a href="#">Elmo2</a>              | 1.046 | 0.48  | 0.645744 | 0.840161 |
| 5997 | 10552208 | <a href="#">AK045908</a>           | <a href="#">110959</a>    | nudix (nucleoside diphosphate   | <a href="#">Nudt19</a>             | 1.045 | 0.606 | 0.563099 | 0.789853 |
| 5998 | 10606026 | <a href="#">NM_019831</a>          | <a href="#">56364</a>     | zinc finger, MYM-type 3         | <a href="#">Zmym3</a>              | 1.045 | 0.604 | 0.564591 | 0.790721 |
| 5999 | 10569771 | <a href="#">NM_053177</a>          | <a href="#">94178</a>     | mucoilin 1                      | <a href="#">Mcoln1</a>             | 1.045 | 0.421 | 0.686317 | 0.861515 |
| 6000 | 10452658 | <a href="#">NM_028887</a>          | <a href="#">74355</a>     | SMC hinge domain containing 1   | <a href="#">Smchd1</a>             | 1.045 | 0.944 | 0.375724 | 0.645773 |
| 6001 | 10561323 | <a href="#">NM_001081292</a>       | <a href="#">269881</a>    | mitogen-activated protein kina  | <a href="#">Map3k10</a>            | 1.045 | 0.4   | 0.700528 | 0.86896  |
| 6002 | 10379901 | <a href="#">NM_138681</a>          | <a href="#">192197</a>    | breast carcinoma amplified seq  | <a href="#">Bcas3</a>              | 1.045 | 1.158 | 0.283871 | 0.559215 |
| 6003 | 10573048 | <a href="#">NM_026904</a>          | <a href="#">68999</a>     | anaphase promoting complex sub  | <a href="#">Anapc10</a>            | 1.045 | 0.168 | 0.870995 | 0.948568 |
| 6004 | 10405539 | <a href="#">NM_175150</a>          | <a href="#">69672</a>     | thioredoxin domain containing   | <a href="#">Txnde15</a>            | 1.045 | 0.155 | 0.880765 | 0.952675 |
| 6005 | 10412897 | <a href="#">XR_033982</a>          | <a href="#">632287</a>    | similar to pleckstrin homology  | <a href="#">LOC632287</a>          | 1.045 | 0.688 | 0.513216 | 0.753594 |
| 6006 | 10504640 |                                    |                           |                                 |                                    | 1.045 | 0.311 | 0.764321 | 0.90173  |
| 6007 | 10529218 | <a href="#">NM_028150</a>          | <a href="#">72195</a>     | suppressor of Ty 7 (S. cerevis  | <a href="#">Supt7l</a>             | 1.045 | 1.445 | 0.190567 | 0.449454 |
| 6008 | 10378637 | <a href="#">NM_001004157</a>       | <a href="#">380713</a>    | scavenger receptor class F, me  | <a href="#">Scarf1</a>             | 1.045 | 1.133 | 0.293365 | 0.569485 |
| 6009 | 10534504 | <a href="#">NM_172541</a>          | <a href="#">215210</a>    | transmembrane protein 120A      | <a href="#">Tmem120a</a>           | 1.045 | 0.026 | 0.979721 | 0.991919 |
| 6010 | 10520048 | <a href="#">ENSMUST00000094962</a> | <a href="#">69188</a>     | myeloid/lymphoid or mixed-line  | <a href="#">Mll5</a>               | 1.045 | 0.742 | 0.481703 | 0.730954 |
| 6011 | 10375650 | <a href="#">NM_029004</a>          | <a href="#">74563</a>     | RasGEF domain family, member 1  | <a href="#">Rasgef1c</a>           | 1.045 | 0.782 | 0.45885  | 0.713797 |
| 6012 | 10541862 | <a href="#">BC057601</a>           | <a href="#">320678</a>    | RIKEN cDNA A930037G23 gene      | <a href="#">A930037G23Rik</a>      | 1.045 | 0.561 | 0.591614 | 0.806879 |
| 6013 | 10446071 | <a href="#">NM_010192</a>          | <a href="#">14154</a>     | feminization 1 homolog a (C. e  | <a href="#">Fem1a</a>              | 1.045 | 0.451 | 0.66536  | 0.850877 |
| 6014 | 10417778 | <a href="#">NM_026528</a>          | <a href="#">68045</a>     | RIKEN cDNA 2700060E02 gene      | <a href="#">2700060E02Rik</a>      | 1.045 | 0.276 | 0.79     | 0.914502 |
| 6015 | 10498591 | <a href="#">ENSMUST00000054825</a> | <a href="#">109222</a>    | retinoic acid receptor respond  | <a href="#">Rarres1</a>            | 1.045 | 1.169 | 0.27963  | 0.554852 |
| 6016 | 10356780 | <a href="#">NM_080850</a>          | <a href="#">269224</a>    | PAS domain containing serine/t  | <a href="#">Pask</a>               | 1.045 | 0.519 | 0.619294 | 0.82476  |
| 6017 | 10501483 | <a href="#">ENSMUST00000051253</a> | <a href="#">100043181</a> | hypothetical protein LOC100043  | <a href="#">LOC100043181</a>       | 1.045 | 1.228 | 0.25786  | 0.531958 |
| 6018 | 10513551 | <a href="#">ENSMUST00000084527</a> | <a href="#">338355</a>    | FK506 binding protein 15        | <a href="#">Fkbp15</a>             | 1.045 | 1.24  | 0.253677 | 0.527927 |
| 6019 | 10445574 | <a href="#">NM_025611</a>          | <a href="#">66515</a>     | cullin 7                        | <a href="#">Cul7</a>               | 1.045 | 0.834 | 0.43127  | 0.691864 |
| 6020 | 10491897 |                                    |                           |                                 |                                    | 1.045 | 1.033 | 0.334807 | 0.610375 |
| 6021 | 10439249 | <a href="#">NM_001039530</a>       | <a href="#">547253</a>    | poly (ADP-ribose) polymerase f  | <a href="#">Parp14</a>             | 1.045 | 0.987 | 0.355548 | 0.628098 |
| 6022 | 10509163 | <a href="#">NM_008321</a>          | <a href="#">15903</a>     | inhibitor of DNA binding 3      | <a href="#">Id3</a>                | 1.045 | 0.121 | 0.906887 | 0.963531 |
| 6023 | 10488954 | <a href="#">NM_008109</a>          | <a href="#">14563</a>     | growth differentiation factor   | <a href="#">Gdf5</a>               | 1.045 | 0.424 | 0.68408  | 0.860099 |
| 6024 | 10547251 | <a href="#">NM_194339</a>          | <a href="#">213895</a>    | BMS1 homolog, ribosome assembly | <a href="#">Bms1</a>               | 1.045 | 0.208 | 0.840716 | 0.935634 |

|      |          |                                    |                           |                                   |                                    |       |        |          |          |
|------|----------|------------------------------------|---------------------------|-----------------------------------|------------------------------------|-------|--------|----------|----------|
| 6025 | 10577685 | <a href="#">NM_009619</a>          | <a href="#">11497</a>     | a disintegrin and metallopepti    | <a href="#">Adam3</a>              | 1.045 | 0.454  | 0.663158 | 0.849961 |
| 6026 | 10410530 | <a href="#">NM_028878</a>          | <a href="#">74338</a>     | solute carrier family 6 (neuro    | <a href="#">Slc6a19</a>            | 1.045 | 0.933  | 0.380847 | 0.650316 |
| 6027 | 10419676 | <a href="#">NM_172601</a>          | <a href="#">76338</a>     | RAB2B, member RAS oncogene fam    | <a href="#">Rab2b</a>              | 1.045 | 0.169  | 0.870157 | 0.948137 |
| 6028 | 10357952 | <a href="#">NM_001081307</a>       | <a href="#">329251</a>    | protein phosphatase 1, regulat    | <a href="#">Ppp1r12b</a>           | 1.045 | 0.59   | 0.572899 | 0.796481 |
| 6029 | 10571749 |                                    |                           |                                   |                                    | 1.045 | 0.221  | 0.831026 | 0.932182 |
| 6030 | 10492091 | <a href="#">NM_019483</a>          | <a href="#">55994</a>     | MAD homolog 9 (Drosophila)        | <a href="#">Smad9</a>              | 1.045 | 0.402  | 0.699041 | 0.868099 |
| 6031 | 10479560 | <a href="#">NM_001001882</a>       | <a href="#">269400</a>    | regulator of telomere elongati    | <a href="#">Rtel1</a>              | 1.045 | 0.953  | 0.371642 | 0.64202  |
| 6032 | 10364478 | <a href="#">NM_008226</a>          | <a href="#">15166</a>     | hyperpolarization-activated, c    | <a href="#">Hcn2</a>               | 1.045 | 0.39   | 0.708047 | 0.872288 |
| 6033 | 10594549 | <a href="#">XM_001476757</a>       | <a href="#">100041121</a> | similar to Sec61-complex gamma    | <a href="#">LOC100041121</a>       | 1.045 | 0.172  | 0.868397 | 0.947244 |
| 6034 | 10464914 | <a href="#">NM_001001885</a>       | <a href="#">381199</a>    | transmembrane protein 151A        | <a href="#">Tmem151a</a>           | 1.045 | 0.545  | 0.601997 | 0.813486 |
| 6035 | 10347277 | <a href="#">NM_008342</a>          | <a href="#">16008</a>     | insulin-like growth factor bin    | <a href="#">Igfbp2</a>             | 1.045 | 0.061  | 0.953247 | 0.981996 |
| 6036 | 10391242 | <a href="#">NM_024456</a>          | <a href="#">19345</a>     | RAB5C, member RAS oncogene fam    | <a href="#">Rab5c</a>              | 1.045 | 0.155  | 0.88139  | 0.953061 |
| 6037 | 10482517 | <a href="#">NM_019401</a>          | <a href="#">64685</a>     | N-myc (and STAT) interactor       | <a href="#">Nmi</a>                | 1.045 | 0.137  | 0.894768 | 0.958505 |
| 6038 | 10550632 | <a href="#">NM_0207525</a>         | <a href="#">403187</a>    | optic atrophy 3 (human)           | <a href="#">Opa3</a>               | 1.045 | 0.459  | 0.659548 | 0.848316 |
| 6039 | 10401289 | <a href="#">NM_011387</a>          | <a href="#">20493</a>     | solute carrier family 10 (sodi    | <a href="#">Slc10a1</a>            | 1.045 | 0.929  | 0.382976 | 0.652509 |
| 6040 | 10416230 | <a href="#">NM_020275</a>          | <a href="#">21933</a>     | tumor necrosis factor receptor    | <a href="#">Tnfrsf10b</a>          | 1.045 | 0.152  | 0.883488 | 0.954108 |
| 6041 | 10578120 | <a href="#">ENSMUST00000079376</a> | <a href="#">78636</a>     | RIKEN cDNA 1700104B16 gene        | <a href="#">1700104B16Rik</a>      | 1.045 | 0.994  | 0.352183 | 0.625281 |
| 6042 | 10579969 | <a href="#">NM_145600</a>          | <a href="#">30932</a>     | zinc finger protein 330           | <a href="#">Zfp330</a>             | 1.045 | 0.191  | 0.85392  | 0.940913 |
| 6043 | 10359677 | <a href="#">NM_025505</a>          | <a href="#">66352</a>     | basic leucine zipper nuclear f    | <a href="#">Blzf1</a>              | 1.045 | 0.486  | 0.641058 | 0.837375 |
| 6044 | 10478196 | <a href="#">NM_009408</a>          | <a href="#">21969</a>     | topoisomerase (DNA) I             | <a href="#">Top1</a>               | 1.045 | 0.68   | 0.517498 | 0.756706 |
| 6045 | 10574464 | <a href="#">NM_028524</a>          | <a href="#">75502</a>     | CKLF-like MARVEL transmembrane    | <a href="#">Cmtm2b</a>             | 1.045 | 0.306  | 0.767908 | 0.903579 |
| 6046 | 10439005 | <a href="#">NM_025800</a>          | <a href="#">66849</a>     | protein phosphatase 1, regulat    | <a href="#">Ppp1r2</a>             | 1.045 | 0.257  | 0.804504 | 0.920877 |
| 6047 | 10511808 | <a href="#">ENSMUST00000062777</a> | <a href="#">67735</a>     | RIKEN cDNA 4930528A17 gene        | <a href="#">4930528A17Rik</a>      | 1.045 | 0.522  | 0.61736  | 0.823029 |
| 6048 | 10413803 | <a href="#">NM_025295</a>          | <a href="#">26363</a>     | biotinidase                       | <a href="#">Btd</a>                | 1.045 | 0.299  | 0.773081 | 0.906652 |
| 6049 | 10494407 | <a href="#">NM_175666</a>          | <a href="#">319189</a>    | histone cluster 2, H2bb           | <a href="#">Hist2h2bb</a>          | 1.045 | -0.407 | 0.695475 | 0.866211 |
| 6050 | 10493494 | <a href="#">AK140090</a>           | <a href="#">100038411</a> | predicted gene, ENSMUSG0000007    | <a href="#">ENSMUSG00000074470</a> | 1.044 | 0.668  | 0.525041 | 0.761313 |
| 6051 | 10495781 | <a href="#">NM_013867</a>          | <a href="#">29815</a>     | breast cancer anti-estrogen re    | <a href="#">Bear3</a>              | 1.044 | 0.387  | 0.709822 | 0.872992 |
| 6052 | 10398751 | <a href="#">NM_026752</a>          | <a href="#">68520</a>     | zinc finger, FYVE domain conta    | <a href="#">Zfyve21</a>            | 1.044 | 0.633  | 0.546298 | 0.777695 |
| 6053 | 10366653 | <a href="#">NM_011915</a>          | <a href="#">24117</a>     | Wnt inhibitory factor 1           | <a href="#">Wif1</a>               | 1.044 | 1.151  | 0.286497 | 0.562199 |
| 6054 | 10410721 | <a href="#">NM_029847</a>          | <a href="#">77041</a>     | arylsulfatase K                   | <a href="#">Arsk</a>               | 1.044 | 0.389  | 0.708668 | 0.872486 |
| 6055 | 10434835 |                                    |                           |                                   |                                    | 1.044 | 0.765  | 0.468749 | 0.720973 |
| 6056 | 10414427 | <a href="#">NR_003630</a>          | <a href="#">624367</a>    | predicted gene, EG624367          | <a href="#">EG624367</a>           | 1.044 | 0.81   | 0.443643 | 0.702388 |
| 6057 | 10420383 | <a href="#">AK139567</a>           | <a href="#">105611</a>    | expressed sequence AU040096       | <a href="#">AU040096</a>           | 1.044 | 0.504  | 0.629298 | 0.831256 |
| 6058 | 10529567 | <a href="#">NM_001081232</a>       | <a href="#">320661</a>    | DNA segment, Chr 5, ERATO Doi     | <a href="#">D5Erd579e</a>          | 1.044 | 0.2    | 0.847366 | 0.938194 |
| 6059 | 10560528 |                                    |                           |                                   |                                    | 1.044 | 0.577  | 0.581536 | 0.800365 |
| 6060 | 10549849 | <a href="#">NM_001025163</a>       | <a href="#">330463</a>    | zinc finger protein 78            | <a href="#">Zfp78</a>              | 1.044 | 0.935  | 0.380036 | 0.6497   |
| 6061 | 10430818 | <a href="#">NM_028075</a>          | <a href="#">72049</a>     | tumor necrosis factor receptor    | <a href="#">Tnfrsf13c</a>          | 1.044 | 0.309  | 0.765844 | 0.902563 |
| 6062 | 10374197 | <a href="#">NM_019511</a>          | <a href="#">56089</a>     | receptor (calcitonin) activity    | <a href="#">Ramp3</a>              | 1.044 | 0.074  | 0.943307 | 0.977948 |
| 6063 | 10532133 | <a href="#">NM_007964</a>          | <a href="#">14020</a>     | ecotropic viral integration si    | <a href="#">Evi5</a>               | 1.044 | 0.447  | 0.667919 | 0.851904 |
| 6064 | 10526848 | <a href="#">NM_183025</a>          | <a href="#">243308</a>    | RIKEN cDNA A430033K04 gene        | <a href="#">A430033K04Rik</a>      | 1.044 | 0.106  | 0.918696 | 0.967805 |
| 6065 | 10481670 | <a href="#">NM_130860</a>          | <a href="#">107951</a>    | cyclin-dependent kinase 9 (CDC    | <a href="#">Cdk9</a>               | 1.044 | 0.155  | 0.881302 | 0.953061 |
| 6066 | 10360046 | <a href="#">NM_025321</a>          | <a href="#">66052</a>     | succinate dehydrogenase comple    | <a href="#">Sdhc</a>               | 1.044 | 0.522  | 0.617192 | 0.823029 |
| 6067 | 10512653 |                                    |                           |                                   |                                    | 1.044 | 1.399  | 0.203402 | 0.466305 |
| 6068 | 10374769 |                                    |                           |                                   |                                    | 1.044 | 0.201  | 0.846047 | 0.937284 |
| 6069 | 10430997 | <a href="#">NM_011862</a>          | <a href="#">23970</a>     | protein kinase C and casein ki    | <a href="#">Pacsin2</a>            | 1.044 | 0.302  | 0.771186 | 0.905685 |
| 6070 | 10468292 | <a href="#">AK086428</a>           | <a href="#">100049155</a> | predicted gene, ENSMUSG0000007    | <a href="#">ENSMUSG00000071525</a> | 1.044 | -0.153 | 0.882642 | 0.953681 |
| 6071 | 10600419 | <a href="#">NM_008883</a>          | <a href="#">18846</a>     | plexin A3                         | <a href="#">Plxna3</a>             | 1.044 | 0.641  | 0.541525 | 0.773858 |
| 6072 | 10435094 | <a href="#">NM_016788</a>          | <a href="#">51789</a>     | tyrosine kinase, non-receptor,    | <a href="#">Tnk2</a>               | 1.044 | 0.982  | 0.357971 | 0.630288 |
| 6073 | 10282615 | <a href="#">NM_144707</a>          | <a href="#">210990</a>    | protein kinase, cell differentiat | <a href="#">Mknk1</a>              | 1.044 | 0.858  | 0.418445 | 0.681004 |

|      |          |                                     |                           |                                       |                                    |       |       |          |          |
|------|----------|-------------------------------------|---------------------------|---------------------------------------|------------------------------------|-------|-------|----------|----------|
| 6073 | 10383013 | <a href="#">NM_174797</a>           | <a href="#">710029</a>    | metformin-guar-phenylamino-derivative | <a href="#">Meim1</a>              | 1.044 | 0.838 | 0.418443 | 0.981004 |
| 6074 | 10508465 | <a href="#">NM_010807</a>           | <a href="#">17357</a>     | MARCKS-like 1                         | <a href="#">Marcks11</a>           | 1.044 | 0.7   | 0.505794 | 0.747682 |
| 6075 | 10543551 | <a href="#">NM_133925</a>           | <a href="#">68272</a>     | RNA binding motif protein 28          | <a href="#">Rbm28</a>              | 1.044 | 0.787 | 0.45613  | 0.712448 |
| 6076 | 10415248 | <a href="#">NM_028994</a>           | <a href="#">74551</a>     | phosphoenolpyruvate carboxykin        | <a href="#">Pck2</a>               | 1.044 | 0.703 | 0.504276 | 0.746511 |
| 6077 | 10376496 | <a href="#">NM_178659</a>           | <a href="#">194952</a>    | jumonji domain containing 4           | <a href="#">Jmjd4</a>              | 1.044 | 0.41  | 0.693578 | 0.865705 |
| 6078 | 10381738 | <a href="#">NM_009521</a>           | <a href="#">22415</a>     | wingless-related MMTV integrat        | <a href="#">Wnt3</a>               | 1.044 | 0.9   | 0.397326 | 0.664272 |
| 6079 | 10426225 | <a href="#">NM_001115132</a>        | <a href="#">52683</a>     | non-SMC condensin II complex,         | <a href="#">Ncaph2</a>             | 1.044 | 0.631 | 0.547667 | 0.778543 |
| 6080 | 10587940 |                                     |                           |                                       |                                    | 1.044 | 0.556 | 0.594806 | 0.808991 |
| 6081 | 10359816 | <a href="#">NM_175170</a>           | <a href="#">71592</a>     | pogo transposable element with        | <a href="#">Pogk</a>               | 1.044 | 0.614 | 0.557882 | 0.785788 |
| 6082 | 10584047 | <a href="#">NM_013906</a>           | <a href="#">30806</a>     | a disintegrin-like and metallo        | <a href="#">Adamts8</a>            | 1.044 | 0.564 | 0.590163 | 0.806047 |
| 6083 | 10592919 | <a href="#">NM_145985</a>           | <a href="#">213827</a>    | archain 1                             | <a href="#">Arcn1</a>              | 1.044 | 0.906 | 0.394274 | 0.661945 |
| 6084 | 10540241 | <a href="#">NM_022992</a>           | <a href="#">65106</a>     | ADP-ribosylation factor-like 6        | <a href="#">Arl6ip5</a>            | 1.044 | 0.269 | 0.795588 | 0.916955 |
| 6085 | 10416566 | <a href="#">NM_029495</a>           | <a href="#">108670</a>    | epithelial stromal interaction        | <a href="#">Epsti1</a>             | 1.044 | 0.914 | 0.390311 | 0.658911 |
| 6086 | 10602592 | <a href="#">NM_016763</a>           | <a href="#">15108</a>     | hydroxysteroid (17-beta) dehyd        | <a href="#">Hsd17b10</a>           | 1.044 | 0.096 | 0.926128 | 0.970758 |
| 6087 | 10434975 | <a href="#">NM_013900</a>           | <a href="#">30060</a>     | antigen p97 (melanoma associat        | <a href="#">Mfi2</a>               | 1.044 | 1.043 | 0.33055  | 0.606749 |
| 6088 | 10422509 |                                     |                           |                                       |                                    | 1.044 | 1.125 | 0.296739 | 0.573306 |
| 6089 | 10539218 |                                     |                           |                                       |                                    | 1.044 | 0.669 | 0.524407 | 0.760916 |
| 6090 | 10501663 | <a href="#">NM_030016</a>           | <a href="#">229780</a>    | coiled-coil domain containing         | <a href="#">Ccdc76</a>             | 1.044 | 0.601 | 0.566474 | 0.79227  |
| 6091 | 10517364 | <a href="#">ENSMUST00000105860</a>  | <a href="#">230822</a>    | RIKEN cDNA A330049M08 gene            | <a href="#">A330049M08Rik</a>      | 1.044 | 0.751 | 0.476673 | 0.727638 |
| 6092 | 10477134 | <a href="#">NM_001037247</a>        | <a href="#">266620</a>    | defensin beta 36                      | <a href="#">Defb36</a>             | 1.044 | 1.065 | 0.32128  | 0.598079 |
| 6093 | 10494262 | <a href="#">NM_007802</a>           | <a href="#">13038</a>     | cathepsin K                           | <a href="#">Ctsk</a>               | 1.044 | 1.223 | 0.259648 | 0.533994 |
| 6094 | 10432408 | <a href="#">NM_001024702</a>        | <a href="#">239659</a>    | complement component 1, q subc        | <a href="#">C1q4</a>               | 1.044 | 0.902 | 0.396174 | 0.663738 |
| 6095 | 10416355 | <a href="#">NM_134083</a>           | <a href="#">105670</a>    | regulator of chromosome conden        | <a href="#">Rcbtb2</a>             | 1.044 | 0.449 | 0.666569 | 0.851355 |
| 6096 | 10510265 | <a href="#">NM_008725</a>           | <a href="#">230899</a>    | natriuretic peptide precursor         | <a href="#">Nppa</a>               | 1.044 | 0.371 | 0.7214   | 0.878683 |
| 6097 | 10537246 | <a href="#">ENSMUST00000043815</a>  | <a href="#">70699</a>     | nucleoporin 205                       | <a href="#">Nup205</a>             | 1.044 | 0.351 | 0.735367 | 0.886785 |
| 6098 | 10554057 | <a href="#">NM_001033877</a>        | <a href="#">233332</a>    | a disintegrin-like and metallo        | <a href="#">Adamts17</a>           | 1.044 | 1.233 | 0.256392 | 0.530714 |
| 6099 | 10541112 | <a href="#">BC018185</a>            | <a href="#">98758</a>     | heterogeneous nuclear ribonucl        | <a href="#">Hnrpf</a>              | 1.044 | 0.277 | 0.789678 | 0.914492 |
| 6100 | 10471814 | <a href="#">NM_177383</a>           | <a href="#">338346</a>    | G protein-coupled receptor 21         | <a href="#">Gpr21</a>              | 1.044 | 0.354 | 0.733666 | 0.886032 |
| 6101 | 10524515 | <a href="#">ENSMUST000000031566</a> | <a href="#">231646</a>    | myosin 1H                             | <a href="#">Myo1h</a>              | 1.043 | 0.195 | 0.850936 | 0.94008  |
| 6102 | 10526968 | <a href="#">NM_175522</a>           | <a href="#">243312</a>    | leucine rich repeat and fibron        | <a href="#">Elfn1</a>              | 1.043 | 1.147 | 0.288026 | 0.563886 |
| 6103 | 10496159 | <a href="#">NM_027927</a>           | <a href="#">71793</a>     | integrator complex subunit 12         | <a href="#">Ints12</a>             | 1.043 | 0.231 | 0.823373 | 0.929428 |
| 6104 | 10567838 | <a href="#">NM_023712</a>           | <a href="#">73658</a>     | spinster homolog 1 (Drosophila        | <a href="#">Spns1</a>              | 1.043 | 0.952 | 0.371855 | 0.642152 |
| 6105 | 10358379 | <a href="#">NM_013835</a>           | <a href="#">20822</a>     | TROVE domain family, member 2         | <a href="#">Trove2</a>             | 1.043 | 0.159 | 0.877952 | 0.951715 |
| 6106 | 10491520 | <a href="#">AK140083</a>            | <a href="#">100049565</a> | predicted gene, ENSMUSG0000007        | <a href="#">ENSMUSG00000074633</a> | 1.043 | 0.414 | 0.69071  | 0.864369 |
| 6107 | 10596034 | <a href="#">NM_001033543</a>        | <a href="#">213208</a>    | interleukin 20 receptor beta          | <a href="#">Il20rb</a>             | 1.043 | 1.193 | 0.270815 | 0.545372 |
| 6108 | 10580990 | <a href="#">NM_001039154</a>        | <a href="#">12564</a>     | cadherin 8                            | <a href="#">Cdh8</a>               | 1.043 | 0.194 | 0.851185 | 0.94011  |
| 6109 | 10581188 | <a href="#">BC043046</a>            | <a href="#">74356</a>     | RIKEN cDNA 4931428F04 gene            | <a href="#">4931428F04Rik</a>      | 1.043 | 0.911 | 0.391773 | 0.660136 |
| 6110 | 10453855 |                                     |                           |                                       |                                    | 1.043 | 0.773 | 0.46434  | 0.718115 |
| 6111 | 10391752 |                                     |                           |                                       |                                    | 1.043 | 0.477 | 0.647182 | 0.841007 |
| 6112 | 10535637 | <a href="#">NM_133735</a>           | <a href="#">71799</a>     | pentatricopeptide repeat domai        | <a href="#">Pted1</a>              | 1.043 | 0.505 | 0.628637 | 0.830964 |
| 6113 | 10351047 | <a href="#">NM_027429</a>           | <a href="#">70454</a>     | centromere protein L                  | <a href="#">Cenpl</a>              | 1.043 | 0.022 | 0.982969 | 0.99264  |
| 6114 | 10566583 | <a href="#">XR_035350</a>           | <a href="#">668139</a>    | predicted gene, EG668139              | <a href="#">EG668139</a>           | 1.043 | 0.023 | 0.982379 | 0.9924   |
| 6115 | 10522696 | <a href="#">NM_206935</a>           | <a href="#">384185</a>    | ADP-ribosylation factor-like 9        | <a href="#">Arl9</a>               | 1.043 | 0.58  | 0.579755 | 0.799162 |
| 6116 | 10438109 | <a href="#">NM_009456</a>           | <a href="#">22195</a>     | ubiquitin-conjugating enzyme E        | <a href="#">Ube213</a>             | 1.043 | 0.301 | 0.771583 | 0.905749 |
| 6117 | 10427521 | <a href="#">NM_001081402</a>        | <a href="#">545085</a>    | WD repeat domain 70                   | <a href="#">Wdr70</a>              | 1.043 | 0.089 | 0.931444 | 0.972759 |
| 6118 | 10527423 | <a href="#">NM_001081362</a>        | <a href="#">100683</a>    | transformation/transcription d        | <a href="#">Trrap</a>              | 1.043 | 0.534 | 0.609075 | 0.818045 |
| 6119 | 10477739 | <a href="#">NM_008383</a>           | <a href="#">16328</a>     | centrosomal protein 250               | <a href="#">Cep250</a>             | 1.043 | 1.519 | 0.171271 | 0.423203 |
| 6120 | 10534441 | <a href="#">NM_148932</a>           | <a href="#">107939</a>    | nuclear pore membrane protein         | <a href="#">Pom121</a>             | 1.043 | 0.284 | 0.784197 | 0.912068 |
| 6121 | 10530434 | <a href="#">NM_178599</a>           | <a href="#">27784</a>     | COMM domain containing 8              | <a href="#">Comm8</a>              | 1.043 | 0.269 | 0.79548  | 0.916955 |
| 6122 | 10513404 | <a href="#">ENSMUST00000098053</a>  | <a href="#">100038512</a> | predicted gene, OTTMUSG0000000        | <a href="#">OTTMUSG00000007406</a> | 1.043 | 0.535 | 0.608836 | 0.817918 |
| 6123 | 10400649 | <a href="#">NM_011133</a>           | <a href="#">18974</a>     | polymerase (DNA directed), eps        | <a href="#">Pole2</a>              | 1.043 | 0.807 | 0.445347 | 0.703573 |
| 6124 | 10571302 | <a href="#">NM_026432</a>           | <a href="#">67887</a>     | transmembrane protein 66              | <a href="#">Tmem66</a>             | 1.043 | 0.759 | 0.471976 | 0.723883 |
| 6125 | 10511099 | <a href="#">NM_177186</a>           | <a href="#">320541</a>    | RIKEN cDNA A530082C11 gene            | <a href="#">A530082C11Rik</a>      | 1.043 | 0.204 | 0.843846 | 0.936634 |

|      |          |                                    |                        |                                |                                    |       |        |           |          |
|------|----------|------------------------------------|------------------------|--------------------------------|------------------------------------|-------|--------|-----------|----------|
| 6126 | 10374564 | <a href="#">NM_009837</a>          | <a href="#">12464</a>  | chaperonin subunit 4 (delta)   | <a href="#">Cct4</a>               | 1.043 | 0.603  | 0.564826  | 0.790905 |
| 6127 | 10383518 | <a href="#">NM_001001333</a>       | <a href="#">238023</a> | hexosaminidase (glycosyl hydro | <a href="#">Hexdc</a>              | 1.043 | 0.715  | 0.496871  | 0.741257 |
| 6128 | 10520379 | <a href="#">NM_028234</a>          | <a href="#">381626</a> | proline rich 8                 | <a href="#">Prr8</a>               | 1.043 | 0.642  | 0.540926  | 0.773315 |
| 6129 | 10600372 | <a href="#">ENSMUST00000056152</a> | <a href="#">320703</a> | RIKEN cDNA B230340J04 gene     | <a href="#">B230340J04Rik</a>      | 1.043 | 0.314  | 0.76268   | 0.901202 |
| 6130 | 10531484 | <a href="#">NM_175270</a>          | <a href="#">78088</a>  | ankyrin repeat domain 56       | <a href="#">Ankrd56</a>            | 1.043 | 0.973  | 0.361983  | 0.633538 |
| 6131 | 10400321 | <a href="#">NM_134054</a>          | <a href="#">104725</a> | RIKEN cDNA I110002B05 gene     | <a href="#">I110002B05Rik</a>      | 1.043 | 0.548  | 0.599958  | 0.812084 |
| 6132 | 10573346 |                                    |                        |                                |                                    | 1.043 | 1.246  | 0.251676  | 0.525573 |
| 6133 | 10407782 | <a href="#">NM_133643</a>          | <a href="#">171211</a> | EDAR (ectodysplasin-A receptor | <a href="#">Edaradd</a>            | 1.043 | 0.945  | 0.375269  | 0.645306 |
| 6134 | 10576328 | <a href="#">NM_008559</a>          | <a href="#">17199</a>  | melanocortin 1 receptor        | <a href="#">Mclr</a>               | 1.043 | 0.705  | 0.503062  | 0.745637 |
| 6135 | 10447130 | <a href="#">BC086639</a>           | <a href="#">106522</a> | expressed sequence AW548124    | <a href="#">AW548124</a>           | 1.043 | 0.363  | 0.727025  | 0.881688 |
| 6136 | 10597420 | <a href="#">NM_009916</a>          | <a href="#">12773</a>  | chemokine (C-C motif) receptor | <a href="#">Cer4</a>               | 1.043 | 0.723  | 0.492741  | 0.738692 |
| 6137 | 10378774 | <a href="#">NM_019818</a>          | <a href="#">56322</a>  | translocase of inner mitochond | <a href="#">Timm22</a>             | 1.043 | -0.687 | 0.513337  | 0.753698 |
| 6138 | 10484503 | <a href="#">NM_001033346</a>       | <a href="#">241528</a> | leucine rich repeat containing | <a href="#">Lrrc55</a>             | 1.043 | 0.239  | 0.817864  | 0.927532 |
| 6139 | 10600763 | <a href="#">XM_894481</a>          | <a href="#">629581</a> | predicted gene, EG629581       | <a href="#">EG629581</a>           | 1.043 | 0.989  | 0.354667  | 0.627276 |
| 6140 | 10570418 | <a href="#">NM_025924</a>          | <a href="#">67031</a>  | UPF3 regulator of nonsense tra | <a href="#">Upf3a</a>              | 1.043 | 0.373  | 0.719771  | 0.878026 |
| 6141 | 10465521 | <a href="#">NM_008874</a>          | <a href="#">18797</a>  | phospholipase C, beta 3        | <a href="#">Plec3</a>              | 1.043 | 0.691  | 0.51144   | 0.752366 |
| 6142 | 10570599 | <a href="#">NM_153115</a>          | <a href="#">78128</a>  | sperm associated antigen 11    | <a href="#">Spag11</a>             | 1.043 | 1.3    | 0.233649  | 0.505065 |
| 6143 | 10486562 |                                    |                        |                                |                                    | 1.043 | 0.267  | 0.797019  | 0.917479 |
| 6144 | 10510270 | <a href="#">NM_010840</a>          | <a href="#">17769</a>  | 5,10-methylenetetrahydrofolate | <a href="#">Mthfr</a>              | 1.043 | 0.477  | 0.647738  | 0.841423 |
| 6145 | 10502071 | <a href="#">BC116791</a>           | <a href="#">70617</a>  | RIKEN cDNA 5730508B09 gene     | <a href="#">5730508B09Rik</a>      | 1.043 | 0.424  | 0.683779  | 0.860022 |
| 6146 | 10460879 | <a href="#">NM_008583</a>          | <a href="#">17283</a>  | multiple endocrine neoplasia 1 | <a href="#">Men1</a>               | 1.043 | 0.087  | 0.933003  | 0.97328  |
| 6147 | 10535508 | <a href="#">BC048077</a>           | <a href="#">231874</a> | expressed sequence AU022870    | <a href="#">AU022870</a>           | 1.043 | 0.492  | 0.637519  | 0.83564  |
| 6148 | 10519209 |                                    |                        |                                |                                    | 1.043 | 0.718  | 0.495296  | 0.740179 |
| 6149 | 10374354 |                                    |                        |                                |                                    | 1.043 | 0.935  | 0.380099  | 0.649755 |
| 6150 | 10468722 | <a href="#">NM_010279</a>          | <a href="#">14585</a>  | glial cell line derived neurot | <a href="#">Gfra1</a>              | 1.043 | 0.248  | 0.810922  | 0.923749 |
| 6151 | 10400546 | <a href="#">NM_001033156</a>       | <a href="#">70611</a>  | F-box protein 33               | <a href="#">Fbxo33</a>             | 1.043 | 0.444  | 0.66978   | 0.853123 |
| 6152 | 10363962 | <a href="#">NM_010311</a>          | <a href="#">14687</a>  | guanine nucleotide binding pro | <a href="#">Gnaz</a>               | 1.043 | 0.504  | 0.629055  | 0.831244 |
| 6153 | 10604046 | <a href="#">NM_029951</a>          | <a href="#">77644</a>  | RIKEN cDNA C330007P06 gene     | <a href="#">C330007P06Rik</a>      | 1.043 | 0.306  | 0.768612  | 0.903817 |
| 6154 | 10552462 | <a href="#">NM_174866</a>          | <a href="#">317653</a> | kallikrein related-peptidase 1 | <a href="#">Klk14</a>              | 1.043 | 1.052  | 0.326877  | 0.602991 |
| 6155 | 10528925 | <a href="#">AK132123</a>           | <a href="#">433868</a> | predicted gene, ENSMUSG0000007 | <a href="#">ENSMUSG00000073106</a> | 1.043 | 0.862  | 0.41662   | 0.679566 |
| 6156 | 10416531 |                                    |                        |                                |                                    | 1.043 | 1.478  | 0.181669  | 0.437894 |
| 6157 | 10407053 | <a href="#">BC004049</a>           | <a href="#">75616</a>  | RIKEN cDNA 2810008M24 gene     | <a href="#">2810008M24Rik</a>      | 1.042 | 0.251  | 0.808556  | 0.922966 |
| 6158 | 10426065 | <a href="#">NM_145476</a>          | <a href="#">223754</a> | TBC1 domain family, member 22a | <a href="#">Tbc1d22a</a>           | 1.042 | 0.289  | 0.780839  | 0.911    |
| 6159 | 10599498 | <a href="#">NM_028276</a>          | <a href="#">72554</a>  | UTP14, U3 small nucleolar ribo | <a href="#">Utp14a</a>             | 1.042 | 0.458  | 0.660169  | 0.848652 |
| 6160 | 10482929 | <a href="#">NM_013825</a>          | <a href="#">17076</a>  | lymphocyte antigen 75          | <a href="#">Ly75</a>               | 1.042 | 0.014  | 0.989216  | 0.995336 |
| 6161 | 10442584 | <a href="#">NM_025425</a>          | <a href="#">66211</a>  | ribosomal protein L3-like      | <a href="#">Rpl3l</a>              | 1.042 | 0.83   | 0.433372  | 0.693905 |
| 6162 | 10561204 | <a href="#">NM_181593</a>          | <a href="#">233011</a> | inositol 1,4,5-trisphosphate 3 | <a href="#">Itpkc</a>              | 1.042 | 0.453  | 0.66414   | 0.850267 |
| 6163 | 10555753 | <a href="#">NM_146360</a>          | <a href="#">258357</a> | olfactory receptor 574         | <a href="#">Olfr574</a>            | 1.042 | 1.378  | 0.209437  | 0.474615 |
| 6164 | 10380280 | <a href="#">NM_001033266</a>       | <a href="#">217071</a> | gene model 525, (NCBI)         | <a href="#">Gm525</a>              | 1.042 | 0.475  | 0.649148  | 0.842371 |
| 6165 | 10576659 |                                    |                        |                                |                                    | 1.042 | 0.488  | 0.639872  | 0.836701 |
| 6166 | 10550915 | <a href="#">NM_153112</a>          | <a href="#">260299</a> | cell adhesion molecule 4       | <a href="#">Cadm4</a>              | 1.042 | 0.659  | 0.530613  | 0.765382 |
| 6167 | 10540233 | <a href="#">NM_182808</a>          | <a href="#">320265</a> | RIKEN cDNA C630007B19 gene     | <a href="#">C630007B19Rik</a>      | 1.042 | 0.617  | 0.555932  | 0.784531 |
| 6168 | 10352920 | <a href="#">NM_001011874</a>       | <a href="#">497097</a> | X Kell blood group precursor r | <a href="#">Xkr4</a>               | 1.042 | 0.376  | 0.717928  | 0.876841 |
| 6169 | 10521385 | <a href="#">NM_010445</a>          | <a href="#">15371</a>  | H6 homeo box 1                 | <a href="#">Hmx1</a>               | 1.042 | 0.987  | 0.355755  | 0.628276 |
| 6170 | 10372338 | <a href="#">NM_203660</a>          | <a href="#">368203</a> | predicted gene, EG368203       | <a href="#">EG368203</a>           | 1.042 | 0.758  | 0.472234  | 0.724017 |
| 6171 | 10350760 |                                    |                        |                                |                                    | 1.042 | 0.935  | 0.379918  | 0.6497   |
| 6172 | 10571889 |                                    |                        |                                |                                    | 1.042 | 2.1    | 0.0727145 | 0.254178 |
| 6173 | 10491484 |                                    |                        |                                |                                    | 1.042 | 0.554  | 0.596078  | 0.80968  |
| 6174 | 10555590 | <a href="#">NM_133947</a>          | <a href="#">101706</a> | nuclear mitotic apparatus prot | <a href="#">Numa1</a>              | 1.042 | 0.244  | 0.814295  | 0.925272 |
| 6175 | 10430071 | <a href="#">NM_058214</a>          | <a href="#">79456</a>  | RecQ protein-like 4            | <a href="#">Recql4</a>             | 1.042 | 0.643  | 0.539862  | 0.772463 |
| 6176 | 10407057 | <a href="#">NM_028042</a>          | <a href="#">71991</a>  | excision renaïross-complementi | <a href="#">Frec8</a>              | 1.042 | 0.089  | 0.9316    | 0.972759 |

|      |          |                                    |                           |                                   |                                    |       |       |          |          |
|------|----------|------------------------------------|---------------------------|-----------------------------------|------------------------------------|-------|-------|----------|----------|
| 6177 | 10509256 | <a href="#">BC028950</a>           | <a href="#">242707</a>    | cDNA sequence BC029684            | <a href="#">BC029684</a>           | 1.042 | 0.357 | 0.73157  | 0.884308 |
| 6178 | 10379344 | <a href="#">ENSMUST00000100735</a> | <a href="#">100038730</a> | predicted gene,<br>ENSMUSG0000007 | <a href="#">ENSMUSG00000072632</a> | 1.042 | 0.8   | 0.44904  | 0.706541 |
| 6179 | 10592942 | <a href="#">NM_001081049</a>       | <a href="#">214162</a>    | myeloid/lymphoid or mixed-line    | <a href="#">Mll1</a>               | 1.042 | 0.767 | 0.46733  | 0.720101 |
| 6180 | 10536176 | <a href="#">NM_024260</a>          | <a href="#">73288</a>     | coiled-coil domain containing     | <a href="#">Ccdcl132</a>           | 1.042 | 0.073 | 0.943773 | 0.977948 |
| 6181 | 10383023 | <a href="#">ENSMUST00000080727</a> | <a href="#">791367</a>    | predicted gene,<br>ENSMUSG0000006 | <a href="#">ENSMUSG00000061395</a> | 1.042 | 0.729 | 0.488954 | 0.736349 |
| 6182 | 10577065 | <a href="#">XR_032000</a>          | <a href="#">665373</a>    | similar to ribosomal protein L    | <a href="#">LOC665373</a>          | 1.042 | 0.205 | 0.842912 | 0.936352 |
| 6183 | 10503992 | <a href="#">BC148227</a>           | <a href="#">320500</a>    | RIKEN cDNA A930001M12<br>gene     | <a href="#">A930001M12Rik</a>      | 1.042 | 0.767 | 0.46723  | 0.72007  |
| 6184 | 10441280 | <a href="#">BC046433</a>           | <a href="#">114604</a>    | PR domain containing 15           | <a href="#">Prdm15</a>             | 1.042 | 0.476 | 0.648065 | 0.84174  |
| 6185 | 10509930 | <a href="#">NM_172518</a>          | <a href="#">213499</a>    | F-box protein 42                  | <a href="#">Fbxo42</a>             | 1.042 | 0.145 | 0.888384 | 0.956025 |
| 6186 | 10361215 | <a href="#">NM_153137</a>          | <a href="#">215243</a>    | TRAF3 interacting protein 3       | <a href="#">Traf3ip3</a>           | 1.042 | 0.563 | 0.590771 | 0.806356 |
| 6187 | 10382523 | <a href="#">NM_001033775</a>       | <a href="#">432613</a>    | RIKEN cDNA 4933422H20<br>gene     | <a href="#">4933422H20Rik</a>      | 1.042 | 0.29  | 0.780202 | 0.910759 |
| 6188 | 10454353 | <a href="#">NM_026779</a>          | <a href="#">68591</a>     | molybdenum cofactor sulfurase     | <a href="#">Mocos</a>              | 1.042 | 0.405 | 0.697134 | 0.867224 |
| 6189 | 10596912 | <a href="#">NM_030075</a>          | <a href="#">78267</a>     | kelch domain containing 8B        | <a href="#">Klhdc8b</a>            | 1.042 | 0.815 | 0.441355 | 0.700287 |
| 6190 | 10541216 | <a href="#">BC010717</a>           | <a href="#">214899</a>    | jumonji, AT rich interactive d    | <a href="#">Jarid1a</a>            | 1.042 | 0.31  | 0.765661 | 0.902563 |
| 6191 | 10459262 | <a href="#">NM_198649</a>          | <a href="#">319713</a>    | actin binding LIM protein fami    | <a href="#">Ablim3</a>             | 1.042 | 0.532 | 0.610389 | 0.818705 |
| 6192 | 10477924 | <a href="#">NM_173396</a>          | <a href="#">228839</a>    | TGFB-induced factor 2             | <a href="#">Tgif2</a>              | 1.042 | 0.382 | 0.713757 | 0.874677 |
| 6193 | 10444459 | <a href="#">NM_031176</a>          | <a href="#">81877</a>     | tenascin XB                       | <a href="#">Tnxb</a>               | 1.042 | 0.981 | 0.358536 | 0.630584 |
| 6194 | 10377927 | <a href="#">NM_027445</a>          | <a href="#">70510</a>     | ring finger protein 167           | <a href="#">Rnf167</a>             | 1.042 | 0.62  | 0.554174 | 0.783409 |
| 6195 | 10495059 | <a href="#">NM_153091</a>          | <a href="#">229681</a>    | suppression of tumorigenicity     | <a href="#">St7l</a>               | 1.042 | 0.511 | 0.624877 | 0.828987 |
| 6196 | 10554223 | <a href="#">NM_026498</a>          | <a href="#">67994</a>     | mitochondrial ribosomal protei    | <a href="#">Mrps11</a>             | 1.042 | 0.297 | 0.77485  | 0.907674 |
| 6197 | 10552832 | <a href="#">NM_025533</a>          | <a href="#">66394</a>     | nitric oxide synthase interact    | <a href="#">Nosip</a>              | 1.042 | 0.449 | 0.666416 | 0.851355 |
| 6198 | 10451083 | <a href="#">NM_152810</a>          | <a href="#">71702</a>     | cell division cycle 5-like (S.    | <a href="#">Cdc5l</a>              | 1.042 | 0.397 | 0.702706 | 0.869626 |
| 6199 | 10367076 | <a href="#">NM_008921</a>          | <a href="#">19075</a>     | DNA primase, p49 subunit          | <a href="#">Prim1</a>              | 1.042 | 0.364 | 0.726263 | 0.881516 |
| 6200 | 10510260 | <a href="#">NM_008726</a>          | <a href="#">18158</a>     | natriuretic peptide precursor     | <a href="#">Nppb</a>               | 1.041 | 0.711 | 0.499237 | 0.742535 |
| 6201 | 10585555 | <a href="#">NM_011193</a>          | <a href="#">19200</a>     | proline-serine-threonine phosph   | <a href="#">Pstpip1</a>            | 1.041 | 0.878 | 0.408207 | 0.672667 |
| 6202 | 10487847 | <a href="#">BC071212</a>           | <a href="#">67326</a>     | RIKEN cDNA 1700037H04<br>gene     | <a href="#">1700037H04Rik</a>      | 1.041 | 0.242 | 0.815485 | 0.926126 |
| 6203 | 10535883 | <a href="#">NM_153572</a>          | <a href="#">231912</a>    | katanin p60 subunit A-like 1      | <a href="#">Katnal1</a>            | 1.041 | 0.586 | 0.575491 | 0.797076 |
| 6204 | 10504918 | <a href="#">NM_145547</a>          | <a href="#">230162</a>    | zinc finger protein 189           | <a href="#">Zfp189</a>             | 1.041 | 0.08  | 0.938194 | 0.975903 |
| 6205 | 10496771 | <a href="#">NM_026656</a>          | <a href="#">68279</a>     | mucoilin 2                        | <a href="#">Mcoln2</a>             | 1.041 | 0.816 | 0.44087  | 0.699832 |
| 6206 | 10563659 | <a href="#">NM_175318</a>          | <a href="#">101685</a>    | SPT2, Suppressor of Ty, domain    | <a href="#">Spty2d1</a>            | 1.041 | 0.923 | 0.386029 | 0.655019 |
| 6207 | 10453939 | <a href="#">ENSMUST00000092070</a> | <a href="#">16774</a>     | laminin, alpha 3                  | <a href="#">Lama3</a>              | 1.041 | 0.996 | 0.351525 | 0.624753 |
| 6208 | 10412741 | <a href="#">NM_139227</a>          | <a href="#">246103</a>    | ataxin 7                          | <a href="#">Atxn7</a>              | 1.041 | 0.707 | 0.501522 | 0.744504 |
| 6209 | 10491231 | <a href="#">NM_030557</a>          | <a href="#">80732</a>     | myoneurin                         | <a href="#">Mynn</a>               | 1.041 | 0.608 | 0.561909 | 0.788974 |
| 6210 | 10554967 | <a href="#">ENSMUST00000068485</a> | <a href="#">791297</a>    | predicted gene,<br>ENSMUSG0000005 | <a href="#">ENSMUSG00000055099</a> | 1.041 | 0.773 | 0.463922 | 0.717953 |
| 6211 | 10583228 | <a href="#">BC043120</a>           | <a href="#">72826</a>     | RIKEN cDNA 2810485105 gene        | <a href="#">2810485105Rik</a>      | 1.041 | 0.765 | 0.468666 | 0.720927 |
| 6212 | 10369877 | <a href="#">NM_145420</a>          | <a href="#">216080</a>    | ubiquitin-conjugating enzyme E    | <a href="#">Ube2d1</a>             | 1.041 | 0.94  | 0.377638 | 0.647469 |
| 6213 | 10515590 | <a href="#">NM_172382</a>          | <a href="#">230674</a>    | jumonji domain containing 2A      | <a href="#">Jmjd2a</a>             | 1.041 | 0.518 | 0.620188 | 0.825285 |
| 6214 | 10569504 | <a href="#">NM_024290</a>          | <a href="#">79201</a>     | tumor necrosis factor receptor    | <a href="#">Tnfrsf23</a>           | 1.041 | 0.183 | 0.859946 | 0.943624 |
| 6215 | 10369704 | <a href="#">NM_001079824</a>       | <a href="#">432467</a>    | heterogeneous nuclear ribonucl    | <a href="#">Hnrph3</a>             | 1.041 | 0.973 | 0.36195  | 0.633538 |
| 6216 | 10517715 | <a href="#">NM_011039</a>          | <a href="#">18509</a>     | paired box gene 7                 | <a href="#">Pax7</a>               | 1.041 | 1.034 | 0.334411 | 0.60995  |
| 6217 | 10357954 | <a href="#">NM_001081307</a>       | <a href="#">329251</a>    | protein phosphatase 1, regulat    | <a href="#">Ppp1r12b</a>           | 1.041 | 0.435 | 0.676237 | 0.855911 |
| 6218 | 10567524 | <a href="#">AK016186</a>           | <a href="#">75838</a>     | RIKEN cDNA 4930560O18<br>gene     | <a href="#">4930560O18Rik</a>      | 1.041 | 0.397 | 0.702993 | 0.869729 |
| 6219 | 10555671 | <a href="#">NM_145583</a>          | <a href="#">233575</a>    | FGF receptor activating protei    | <a href="#">Frag1</a>              | 1.041 | 1.342 | 0.220236 | 0.488992 |
| 6220 | 10489915 | <a href="#">BC130272</a>           | <a href="#">69553</a>     | RIKEN cDNA 2310033K02<br>gene     | <a href="#">2310033K02Rik</a>      | 1.041 | 0.817 | 0.440231 | 0.699184 |
| 6221 | 10570556 | <a href="#">NM_173189</a>          | <a href="#">244329</a>    | microcephaly, primary autosome    | <a href="#">Mcpb1</a>              | 1.041 | 0.208 | 0.84105  | 0.935759 |
| 6222 | 10566702 | <a href="#">NM_001011846</a>       | <a href="#">258136</a>    | olfactory receptor 517            | <a href="#">Olfr517</a>            | 1.041 | 0.512 | 0.624164 | 0.828379 |
| 6223 | 10373861 | <a href="#">NM_027859</a>          | <a href="#">71673</a>     | ring finger protein 215           | <a href="#">Rnf215</a>             | 1.041 | 0.478 | 0.64662  | 0.840625 |
| 6224 | 10373021 | <a href="#">NM_001033262</a>       | <a href="#">216438</a>    | membrane-associated ring finge    | <a href="#">March9</a>             | 1.041 | 1.091 | 0.310372 | 0.587004 |
| 6225 | 10408064 | <a href="#">NM_146542</a>          | <a href="#">218066</a>    | olfactory receptor 11             | <a href="#">Olfr11</a>             | 1.041 | 0.38  | 0.714605 | 0.875126 |
| 6226 | 10504912 |                                    |                           |                                   |                                    | 1.041 | 1.05  | 0.327455 | 0.603741 |

|      |          |                                    |                           |                                |                                    |       |        |          |          |
|------|----------|------------------------------------|---------------------------|--------------------------------|------------------------------------|-------|--------|----------|----------|
| 6227 | 10347297 | <a href="#">NM_029711</a>          | <a href="#">76709</a>     | actin related protein 2/3 comp | <a href="#">Arpc2</a>              | 1.041 | 0.868  | 0.413188 | 0.676771 |
| 6228 | 10544108 | <a href="#">NM_001033171</a>       | <a href="#">74253</a>     | killer cell lectin-like recept | <a href="#">Klrg2</a>              | 1.041 | 0.8    | 0.449407 | 0.706889 |
| 6229 | 10539727 | <a href="#">BC026926</a>           | <a href="#">232196</a>    | expressed sequence C87436      | <a href="#">C87436</a>             | 1.041 | 0.334  | 0.74806  | 0.893211 |
| 6230 | 10459604 | <a href="#">NM_153794</a>          | <a href="#">108654</a>    | RIKEN cDNA 4933403F05 gene     | <a href="#">4933403F05Rik</a>      | 1.041 | 0.526  | 0.614357 | 0.821474 |
| 6231 | 10347188 | <a href="#">BC094541</a>           | <a href="#">320460</a>    | RIKEN cDNA A830006F12 gene     | <a href="#">A830006F12Rik</a>      | 1.041 | 0.892  | 0.401147 | 0.666661 |
| 6232 | 10532563 | <a href="#">AK077135</a>           | <a href="#">74376</a>     | myosin XVIIIb                  | <a href="#">Myo18b</a>             | 1.041 | 0.612  | 0.559232 | 0.786667 |
| 6233 | 10385837 | <a href="#">NM_008355</a>          | <a href="#">16163</a>     | interleukin 13                 | <a href="#">Il13</a>               | 1.041 | 1.386  | 0.207133 | 0.471587 |
| 6234 | 10366825 | <a href="#">NM_001033263</a>       | <a href="#">216439</a>    | centaurin, gamma 1             | <a href="#">Centg1</a>             | 1.041 | 0.624  | 0.551839 | 0.781834 |
| 6235 | 10476136 | <a href="#">NM_030559</a>          | <a href="#">80743</a>     | vacuolar protein sorting 16 (y | <a href="#">Vps16</a>              | 1.041 | 0.847  | 0.424235 | 0.686411 |
| 6236 | 10571106 | <a href="#">NM_199042</a>          | <a href="#">73754</a>     | THAP domain containing, apopto | <a href="#">Thap1</a>              | 1.041 | -0.026 | 0.98009  | 0.991919 |
| 6237 | 10579181 | <a href="#">NM_011266</a>          | <a href="#">19727</a>     | regulatory factor X-associated | <a href="#">Rfxank</a>             | 1.041 | 0.797  | 0.450728 | 0.708038 |
| 6238 | 10444752 | <a href="#">NM_008518</a>          | <a href="#">16994</a>     | lymphotoxin B                  | <a href="#">Ltb</a>                | 1.041 | 0.226  | 0.827487 | 0.930659 |
| 6239 | 10353754 | <a href="#">NM_133817</a>          | <a href="#">98403</a>     | zinc finger protein 451        | <a href="#">Zfp451</a>             | 1.041 | 0.42   | 0.686434 | 0.861515 |
| 6240 | 10577179 | <a href="#">NM_025601</a>          | <a href="#">66501</a>     | RIKEN cDNA 1700029H14 gene     | <a href="#">1700029H14Rik</a>      | 1.041 | 1.077  | 0.316108 | 0.59306  |
| 6241 | 10439049 | <a href="#">NM_024464</a>          | <a href="#">72084</a>     | phosphatidylinositol glycan an | <a href="#">Pigx</a>               | 1.041 | 0.226  | 0.827445 | 0.930659 |
| 6242 | 10465838 |                                    |                           |                                |                                    | 1.041 | 0.586  | 0.575679 | 0.797076 |
| 6243 | 10562280 | <a href="#">NM_020563</a>          | <a href="#">57426</a>     | androgen-binding protein eta   | <a href="#">Apbh</a>               | 1.04  | 1.26   | 0.247021 | 0.520325 |
| 6244 | 10448269 | <a href="#">NM_011747</a>          | <a href="#">22654</a>     | zinc finger protein 13         | <a href="#">Zfp13</a>              | 1.04  | 0.89   | 0.40225  | 0.667397 |
| 6245 | 10545425 | <a href="#">BC100525</a>           | <a href="#">71130</a>     | SH2 domain containing 6        | <a href="#">Sh2d6</a>              | 1.04  | 0.736  | 0.485257 | 0.733662 |
| 6246 | 10435697 | <a href="#">NM_001081984</a>       | <a href="#">64082</a>     | popeye domain containing 2     | <a href="#">Popdc2</a>             | 1.04  | 1.323  | 0.226172 | 0.496799 |
| 6247 | 10386110 | <a href="#">NM_008213</a>          | <a href="#">15110</a>     | heart and neural crest derivat | <a href="#">Hand1</a>              | 1.04  | 0.461  | 0.658275 | 0.847092 |
| 6248 | 10547793 |                                    |                           |                                |                                    | 1.04  | 0.04   | 0.969236 | 0.987586 |
| 6249 | 10444591 | <a href="#">NM_013558</a>          | <a href="#">15482</a>     | heat shock protein 1-like      | <a href="#">Hspa11</a>             | 1.04  | -0.389 | 0.708469 | 0.872343 |
| 6250 | 10390707 | <a href="#">NM_011623</a>          | <a href="#">21973</a>     | topoisomerase (DNA) II alpha   | <a href="#">Top2a</a>              | 1.04  | 0.707  | 0.501587 | 0.744504 |
| 6251 | 10424437 |                                    |                           |                                |                                    | 1.04  | 1.069  | 0.319543 | 0.596487 |
| 6252 | 10492558 | <a href="#">NM_133786</a>          | <a href="#">70099</a>     | structural maintenance of chro | <a href="#">Smc4</a>               | 1.04  | 0.684  | 0.515135 | 0.754817 |
| 6253 | 10539486 | <a href="#">NM_008717</a>          | <a href="#">18139</a>     | zinc finger, matrin-like       | <a href="#">Zfml</a>               | 1.04  | 0.399  | 0.701101 | 0.86904  |
| 6254 | 10520815 | <a href="#">NM_009206</a>          | <a href="#">20534</a>     | solute carrier family 4 (anion | <a href="#">Slc4a1ap</a>           | 1.04  | 0.404  | 0.698151 | 0.867722 |
| 6255 | 10496890 | <a href="#">AK052598</a>           | <a href="#">100036544</a> | predicted gene, ENSMUSG0000005 | <a href="#">ENSMUSG00000054747</a> | 1.04  | 0.667  | 0.525772 | 0.761851 |
| 6256 | 10419368 |                                    |                           |                                |                                    | 1.04  | 1.06   | 0.323527 | 0.600004 |
| 6257 | 10353786 | <a href="#">NM_009356</a>          | <a href="#">21756</a>     | testicular serine protease 2   | <a href="#">Tesp2</a>              | 1.04  | 0.927  | 0.384094 | 0.653466 |
| 6258 | 10576073 | <a href="#">NM_001110100</a>       | <a href="#">53325</a>     | Btg3 associated nuclear protei | <a href="#">Banp</a>               | 1.04  | 0.872  | 0.411143 | 0.675147 |
| 6259 | 10378570 |                                    |                           |                                |                                    | 1.04  | 0.188  | 0.855875 | 0.941748 |
| 6260 | 10399575 |                                    |                           |                                |                                    | 1.04  | 0.308  | 0.766748 | 0.902924 |
| 6261 | 10474361 | <a href="#">ENSMUST00000016530</a> | <a href="#">77015</a>     | metallophosphoesterase domain  | <a href="#">Mpped2</a>             | 1.04  | 0.042  | 0.968011 | 0.987153 |
| 6262 | 10560614 | <a href="#">NM_007385</a>          | <a href="#">11425</a>     | apolipoprotein C-IV            | <a href="#">Apoc4</a>              | 1.04  | 0.821  | 0.437719 | 0.696922 |
| 6263 | 10467211 | <a href="#">NM_028263</a>          | <a href="#">72514</a>     | fibroblast growth factor bindi | <a href="#">Fgfbp3</a>             | 1.04  | 0.976  | 0.360747 | 0.632458 |
| 6264 | 10486845 | <a href="#">NM_001025371</a>       | <a href="#">574418</a>    | serine incorporator 4          | <a href="#">RP23-433P19.11</a>     | 1.04  | 0.571  | 0.585587 | 0.80308  |
| 6265 | 10373918 | <a href="#">NM_008501</a>          | <a href="#">16878</a>     | leukemia inhibitory factor     | <a href="#">Lif</a>                | 1.04  | 0.653  | 0.533721 | 0.767706 |
| 6266 | 10479625 | <a href="#">BC050777</a>           | <a href="#">241850</a>    | cDNA sequence BC050777         | <a href="#">BC050777</a>           | 1.04  | 0.537  | 0.60767  | 0.817428 |
| 6267 | 10554789 | <a href="#">NM_009982</a>          | <a href="#">13032</a>     | cathepsin C                    | <a href="#">Ctsc</a>               | 1.04  | -0.212 | 0.838185 | 0.934421 |
| 6268 | 10371676 | <a href="#">AB052760</a>           | <a href="#">70683</a>     | UTP20, small subunit (SSU) pro | <a href="#">Utp20</a>              | 1.04  | 0.117  | 0.909901 | 0.964056 |
| 6269 | 10510365 | <a href="#">NM_016699</a>          | <a href="#">50912</a>     | exosome component 10           | <a href="#">Exosc10</a>            | 1.04  | 0.236  | 0.820117 | 0.928345 |
| 6270 | 10381238 | <a href="#">NM_011550</a>          | <a href="#">21428</a>     | MAX-like protein X             | <a href="#">Mlx</a>                | 1.04  | 0.437  | 0.675224 | 0.855723 |
| 6271 | 10503947 | <a href="#">NM_009889</a>          | <a href="#">12640</a>     | glycoprotein hormones, alpha s | <a href="#">Cga</a>                | 1.04  | 0.566  | 0.588412 | 0.805111 |
| 6272 | 10585015 | <a href="#">NM_080434</a>          | <a href="#">66113</a>     | apolipoprotein A-V             | <a href="#">Apoa5</a>              | 1.04  | 1.05   | 0.327606 | 0.603915 |
| 6273 | 10604199 | <a href="#">NM_001110142</a>       | <a href="#">72584</a>     | cullin 4B                      | <a href="#">Cul4b</a>              | 1.04  | -0.261 | 0.801498 | 0.919489 |
| 6274 | 10476497 | <a href="#">NM_175667</a>          | <a href="#">319196</a>    | ankyrin repeat domain 5        | <a href="#">Ankrd5</a>             | 1.04  | 0.877  | 0.408947 | 0.673268 |
| 6275 | 10452709 | <a href="#">NM_023294</a>          | <a href="#">67052</a>     | NDC80 homolog, kinetochore com | <a href="#">Ndc80</a>              | 1.04  | 0.408  | 0.695004 | 0.866071 |
| 6276 | 10348817 | <a href="#">NM_010891</a>          | <a href="#">18000</a>     | septin 2                       | <a href="#">Sept2</a>              | 1.04  | 0.336  | 0.746118 | 0.892253 |
| 6277 | 10529330 | <a href="#">NM_011914</a>          | <a href="#">24116</a>     | Wolf-Hirschhorn syndrome candi | <a href="#">Whsc2</a>              | 1.04  | 0.619  | 0.555117 | 0.783898 |
| 6278 | 10402428 | <a href="#">NM_026535</a>          | <a href="#">68054</a>     | serine (or cysteine) peptidase | <a href="#">Serpina12</a>          | 1.04  | 0.473  | 0.650209 | 0.843126 |

|      |          |                                    |                           |                                |                                    |       |       |          |          |
|------|----------|------------------------------------|---------------------------|--------------------------------|------------------------------------|-------|-------|----------|----------|
| 6279 | 10531610 | <a href="#">NM_145839</a>          | <a href="#">320292</a>    | RasGEF domain family, member 1 | <a href="#">Rasgef1b</a>           | 1.04  | 0.153 | 0.882386 | 0.953551 |
| 6280 | 10357579 | <a href="#">NM_008551</a>          | <a href="#">17164</a>     | MAP kinase-activated protein k | <a href="#">Mapkapk2</a>           | 1.04  | 0.007 | 0.994261 | 0.997705 |
| 6281 | 10572580 | <a href="#">NM_025917</a>          | <a href="#">67023</a>     | unconventional SNARE in the ER | <a href="#">Use1</a>               | 1.04  | 0.308 | 0.76661  | 0.902924 |
| 6282 | 10459518 | <a href="#">NM_172630</a>          | <a href="#">225651</a>    | metallophosphoesterase 1       | <a href="#">Mppe1</a>              | 1.04  | 0.621 | 0.553685 | 0.78319  |
| 6283 | 10547807 | <a href="#">NM_013509</a>          | <a href="#">13807</a>     | enolase 2, gamma neuronal      | <a href="#">Eno2</a>               | 1.04  | 0.659 | 0.530587 | 0.765382 |
| 6284 | 10567466 | <a href="#">XM_355934</a>          | <a href="#">381917</a>    | dynein, axonemal, heavy chain  | <a href="#">Dnahc3</a>             | 1.04  | 0.997 | 0.351195 | 0.624551 |
| 6285 | 10409414 | <a href="#">NM_009000</a>          | <a href="#">19336</a>     | RAB24, member RAS oncogene fam | <a href="#">Rab24</a>              | 1.04  | 0.684 | 0.51534  | 0.754909 |
| 6286 | 10586242 | <a href="#">XM_001476259</a>       | <a href="#">102442</a>    | DENN/MADD domain containing 4A | <a href="#">Dennd4a</a>            | 1.04  | 0.763 | 0.469609 | 0.721727 |
| 6287 | 10436239 | <a href="#">ENSMUST00000050248</a> | <a href="#">271377</a>    | zinc finger and BTB domain con | <a href="#">Zbtb11</a>             | 1.04  | 0.894 | 0.400034 | 0.665979 |
| 6288 | 10485681 | <a href="#">NM_008045</a>          | <a href="#">14308</a>     | follicle stimulating hormone b | <a href="#">Fshb</a>               | 1.04  | 0.964 | 0.366471 | 0.637434 |
| 6289 | 10528723 | <a href="#">NM_001081383</a>       | <a href="#">231051</a>    | myeloid/lymphoid or mixed-line | <a href="#">Mll3</a>               | 1.04  | 0.356 | 0.732184 | 0.884722 |
| 6290 | 10417972 | <a href="#">NM_178597</a>          | <a href="#">12325</a>     | calcium/calmodulin-dependent p | <a href="#">Camk2g</a>             | 1.04  | 0.633 | 0.546476 | 0.777695 |
| 6291 | 10485982 | <a href="#">NM_009608</a>          | <a href="#">11464</a>     | actin, alpha, cardiac          | <a href="#">Actc1</a>              | 1.04  | 0.45  | 0.665905 | 0.851154 |
| 6292 | 10596281 | <a href="#">ENSMUST00000060084</a> | <a href="#">235567</a>    | DnaJ (Hsp40) homolog, subfamil | <a href="#">Dnajc13</a>            | 1.04  | 0.148 | 0.886734 | 0.955515 |
| 6293 | 10466794 | <a href="#">BC028637</a>           | <a href="#">68034</a>     | RIKEN cDNA 2900009107 gene     | <a href="#">2900009107Rik</a>      | 1.04  | 0.071 | 0.945013 | 0.978279 |
| 6294 | 10362005 | <a href="#">NM_026203</a>          | <a href="#">52906</a>     | Abelson helper integration sit | <a href="#">Ahl1</a>               | 1.04  | 0.41  | 0.693886 | 0.865705 |
| 6295 | 10454059 |                                    |                           |                                |                                    | 1.04  | 0.173 | 0.867127 | 0.946934 |
| 6296 | 10372682 | <a href="#">NM_029875</a>          | <a href="#">215436</a>    | solute carrier family 35, memb | <a href="#">Slc35e3</a>            | 1.04  | 0.14  | 0.892449 | 0.957747 |
| 6297 | 10423951 |                                    |                           |                                |                                    | 1.04  | 0.034 | 0.974164 | 0.988991 |
| 6298 | 10472989 | <a href="#">NM_010467</a>          | <a href="#">15429</a>     | homeo box D1                   | <a href="#">Hoxd1</a>              | 1.04  | 0.482 | 0.644311 | 0.839081 |
| 6299 | 10533256 | <a href="#">NM_145211</a>          | <a href="#">246730</a>    | 2'-5' oligoadenylate synthetas | <a href="#">Oas1a</a>              | 1.039 | 0.386 | 0.710303 | 0.873031 |
| 6300 | 10364583 | <a href="#">NM_130455</a>          | <a href="#">170483</a>    | glutamate receptor, ionotropic | <a href="#">Grin3b</a>             | 1.039 | 0.565 | 0.58931  | 0.80561  |
| 6301 | 10540599 | <a href="#">NM_170673</a>          | <a href="#">211232</a>    | copine family member IX        | <a href="#">Cpne9</a>              | 1.039 | 0.827 | 0.434632 | 0.695096 |
| 6302 | 10559181 | <a href="#">NM_015809</a>          | <a href="#">50775</a>     | keratin associated protein 5-4 | <a href="#">Krtap5.4</a>           | 1.039 | 1.252 | 0.24955  | 0.523619 |
| 6303 | 10412078 | <a href="#">BC118005</a>           | <a href="#">238875</a>    | RIKEN cDNA 9830130M13 gene     | <a href="#">9830130M13Rik</a>      | 1.039 | 0.953 | 0.371211 | 0.641982 |
| 6304 | 10469276 | <a href="#">ENSMUST00000100409</a> | <a href="#">100038528</a> | predicted gene, ENSMUSG0000007 | <a href="#">ENSMUSG00000075530</a> | 1.039 | 1.225 | 0.25908  | 0.533309 |
| 6305 | 10538174 | <a href="#">NM_001029987</a>       | <a href="#">243376</a>    | diamine oxidase-like protein 2 | <a href="#">Doxl2</a>              | 1.039 | 1.125 | 0.296592 | 0.57323  |
| 6306 | 10441620 | <a href="#">NM_201230</a>          | <a href="#">75296</a>     | Fgfr1 oncogene partner         | <a href="#">Fgfr1op</a>            | 1.039 | 0.436 | 0.675336 | 0.855766 |
| 6307 | 10588073 | <a href="#">XM_887600</a>          | <a href="#">623166</a>    | predicted gene, EG623166       | <a href="#">EG623166</a>           | 1.039 | 0.134 | 0.897232 | 0.95959  |
| 6308 | 10527465 | <a href="#">NM_016683</a>          | <a href="#">22757</a>     | zinc finger with KRAB and SCAN | <a href="#">Zkscan5</a>            | 1.039 | 0.016 | 0.987837 | 0.994998 |
| 6309 | 10560551 | <a href="#">NM_016680</a>          | <a href="#">53609</a>     | splicing factor, arginine/seri | <a href="#">Sfrs16</a>             | 1.039 | 0.553 | 0.596915 | 0.810212 |
| 6310 | 10392449 | <a href="#">NM_145940</a>          | <a href="#">52639</a>     | WD repeat domain, phosphoinosi | <a href="#">Wipi1</a>              | 1.039 | 0.488 | 0.64002  | 0.836826 |
| 6311 | 10583809 | <a href="#">NM_009922</a>          | <a href="#">12797</a>     | calponin 1                     | <a href="#">Cnn1</a>               | 1.039 | 0.05  | 0.961449 | 0.985172 |
| 6312 | 10528840 | <a href="#">NM_018878</a>          | <a href="#">55982</a>     | PAX interacting (with transcri | <a href="#">Paxip1</a>             | 1.039 | 0.638 | 0.543196 | 0.775617 |
| 6313 | 10561345 | <a href="#">NM_001081021</a>       | <a href="#">338354</a>    | zinc finger protein 780B       | <a href="#">Zfp780b</a>            | 1.039 | 0.321 | 0.757174 | 0.898087 |
| 6314 | 10368508 | <a href="#">NM_001109747</a>       | <a href="#">66311</a>     | RIKEN cDNA 2610036L11 gene     | <a href="#">2610036L11Rik</a>      | 1.039 | 0.208 | 0.841332 | 0.935777 |
| 6315 | 10409044 | <a href="#">ENSMUST00000061899</a> | <a href="#">70971</a>     | RIKEN cDNA 4931429P17 gene     | <a href="#">4931429P17Rik</a>      | 1.039 | 0.785 | 0.457465 | 0.713059 |
| 6316 | 10600736 | <a href="#">XM_908024</a>          | <a href="#">236891</a>    | predicted gene, EG236891       | <a href="#">EG236891</a>           | 1.039 | 0.493 | 0.636823 | 0.834986 |
| 6317 | 10485828 | <a href="#">ENSMUST00000099590</a> | <a href="#">100038351</a> | predicted gene, ENSMUSG0000007 | <a href="#">ENSMUSG00000074940</a> | 1.039 | 0.591 | 0.572508 | 0.796254 |
| 6318 | 10464445 | <a href="#">XR_034247</a>          | <a href="#">433261</a>    | similar to Sid393p             | <a href="#">LOC433261</a>          | 1.039 | 0.226 | 0.827685 | 0.93066  |
| 6319 | 10454912 | <a href="#">NM_175375</a>          | <a href="#">108857</a>    | ankyrin repeat and KH domain c | <a href="#">Ankhd1</a>             | 1.039 | 0.829 | 0.433793 | 0.694279 |
| 6320 | 10479172 |                                    |                           |                                |                                    | 1.039 | 0.722 | 0.493146 | 0.738933 |
| 6321 | 10477176 |                                    |                           |                                |                                    | 1.039 | 0.577 | 0.581307 | 0.80031  |
| 6322 | 10397201 | <a href="#">NM_144833</a>          | <a href="#">52708</a>     | zinc finger protein 410        | <a href="#">Zfp410</a>             | 1.039 | 0.594 | 0.570705 | 0.795023 |
| 6323 | 10532921 |                                    |                           |                                |                                    | 1.039 | 0.755 | 0.47406  | 0.725639 |
| 6324 | 10533182 | <a href="#">NM_008052</a>          | <a href="#">14357</a>     | deltex 1 homolog (Drosophila)  | <a href="#">Dtx1</a>               | 1.039 | 0.459 | 0.659459 | 0.848254 |
| 6325 | 10405833 |                                    |                           |                                |                                    | 1.039 | 0.668 | 0.524775 | 0.761136 |
| 6326 | 10589190 |                                    |                           |                                |                                    | 1.039 | 0.644 | 0.539206 | 0.772081 |
| 6327 | 10441919 | <a href="#">NM_001083881</a>       | <a href="#">67912</a>     | RIKEN cDNA 1600012H06 gene     | <a href="#">1600012H06Rik</a>      | 1.039 | 0.518 | 0.620287 | 0.825285 |

|      |          |                                    |                        |                                |                               |       |        |          |          |
|------|----------|------------------------------------|------------------------|--------------------------------|-------------------------------|-------|--------|----------|----------|
| 6328 | 10381410 | <a href="#">NM_009708</a>          | <a href="#">11858</a>  | Rho family GTPase 2            | <a href="#">Rnd2</a>          | 1.039 | 0.075  | 0.942157 | 0.977764 |
| 6329 | 10507576 | <a href="#">NM_001011856</a>       | <a href="#">258159</a> | olfactory receptor 1331        | <a href="#">Olfr1331</a>      | 1.039 | 0.823  | 0.43694  | 0.696363 |
| 6330 | 10356498 | <a href="#">ENSMUST00000092611</a> | <a href="#">74918</a>  | IQ motif containing with AAA d | <a href="#">Iqca</a>          | 1.039 | 0.447  | 0.667937 | 0.851904 |
| 6331 | 10558919 |                                    |                        |                                |                               | 1.039 | 0.249  | 0.81016  | 0.923433 |
| 6332 | 10357965 | <a href="#">NM_001033409</a>       | <a href="#">329252</a> | leucine-rich repeat-containing | <a href="#">Lgr6</a>          | 1.039 | 1.062  | 0.322503 | 0.599294 |
| 6333 | 10366938 | <a href="#">NM_177707</a>          | <a href="#">237611</a> | SH3 and cysteine rich domain 3 | <a href="#">Stac3</a>         | 1.039 | 0.73   | 0.488169 | 0.735812 |
| 6334 | 10550931 | <a href="#">NM_153134</a>          | <a href="#">210146</a> | immunity-related GTPase family | <a href="#">Irgq</a>          | 1.039 | 1.005  | 0.347268 | 0.621483 |
| 6335 | 10415818 | <a href="#">NM_175546</a>          | <a href="#">268752</a> | WD repeat and FYVE domain cont | <a href="#">Wdfy2</a>         | 1.039 | 0.105  | 0.918884 | 0.967815 |
| 6336 | 10527340 | <a href="#">NM_001081362</a>       | <a href="#">100683</a> | transformation/transcription d | <a href="#">Trrap</a>         | 1.039 | 0.503  | 0.629675 | 0.831325 |
| 6337 | 10548681 |                                    |                        |                                |                               | 1.039 | 0.697  | 0.5074   | 0.749352 |
| 6338 | 10590191 | <a href="#">NM_026236</a>          | <a href="#">67561</a>  | WD repeat domain 48            | <a href="#">Wdr48</a>         | 1.039 | 0.556  | 0.594889 | 0.809052 |
| 6339 | 10380999 | <a href="#">NM_009971</a>          | <a href="#">12985</a>  | colony stimulating factor 3 (g | <a href="#">Csf3</a>          | 1.039 | 0.467  | 0.65443  | 0.845176 |
| 6340 | 10515574 | <a href="#">NM_009176</a>          | <a href="#">20441</a>  | ST3 beta-galactoside alpha-2,3 | <a href="#">St3gal3</a>       | 1.039 | 0.462  | 0.657999 | 0.847091 |
| 6341 | 10540391 | <a href="#">NM_027296</a>          | <a href="#">70047</a>  | tRNA nucleotidyl transferase,  | <a href="#">Trnt1</a>         | 1.039 | -0.279 | 0.788311 | 0.913849 |
| 6342 | 10464618 | <a href="#">NM_021485</a>          | <a href="#">58988</a>  | ribosomal protein S6 kinase, p | <a href="#">Rps6kb2</a>       | 1.039 | 0.329  | 0.751468 | 0.895256 |
| 6343 | 10587621 | <a href="#">NM_001037907</a>       | <a href="#">382089</a> | rippy2 homolog (zebrafish)     | <a href="#">Ripply2</a>       | 1.039 | 0.939  | 0.378017 | 0.647713 |
| 6344 | 10592772 | <a href="#">NM_138955</a>          | <a href="#">192663</a> | ATP-binding cassette, sub-fami | <a href="#">Abcg4</a>         | 1.039 | 0.859  | 0.417938 | 0.680624 |
| 6345 | 10445629 | <a href="#">NM_178385</a>          | <a href="#">72726</a>  | tubulin-specific chaperone c   | <a href="#">Tbcc</a>          | 1.039 | -0.296 | 0.77578  | 0.908358 |
| 6346 | 10351390 | <a href="#">NM_030245</a>          | <a href="#">27878</a>  | transcriptional adaptor 1 (HFI | <a href="#">Tada11</a>        | 1.039 | 0.479  | 0.645816 | 0.840161 |
| 6347 | 10393881 | <a href="#">NM_010756</a>          | <a href="#">17134</a>  | v-maf musculoaponeurotic fibro | <a href="#">Mafg</a>          | 1.039 | 0.721  | 0.493372 | 0.739056 |
| 6348 | 10376060 | <a href="#">NM_008390</a>          | <a href="#">16362</a>  | interferon regulatory factor 1 | <a href="#">Irf1</a>          | 1.039 | 1.057  | 0.324671 | 0.601113 |
| 6349 | 10481011 | <a href="#">NM_033134</a>          | <a href="#">64436</a>  | inositol polyphosphate-5-phosp | <a href="#">Inpp5e</a>        | 1.039 | 0.596  | 0.569448 | 0.794081 |
| 6350 | 10588577 | <a href="#">NM_009895</a>          | <a href="#">12700</a>  | cytokine inducible SH2-contain | <a href="#">Cish</a>          | 1.039 | 0.594  | 0.570492 | 0.794944 |
| 6351 | 10367215 | <a href="#">NM_133996</a>          | <a href="#">28194</a>  | apolipoprotein N               | <a href="#">Apon</a>          | 1.039 | 0.479  | 0.645891 | 0.840161 |
| 6352 | 10488617 | <a href="#">NM_001009948</a>       | <a href="#">228777</a> | neurensin 2                    | <a href="#">Nrsn2</a>         | 1.039 | 0.949  | 0.373518 | 0.643657 |
| 6353 | 10555793 | <a href="#">NM_146756</a>          | <a href="#">258751</a> | olfactory receptor 608         | <a href="#">Olfr608</a>       | 1.039 | 0.95   | 0.372979 | 0.643356 |
| 6354 | 10395553 | <a href="#">NM_176930</a>          | <a href="#">319504</a> | neuron-glia-CAM-related cell a | <a href="#">Nrcam</a>         | 1.039 | 0.307  | 0.76722  | 0.903106 |
| 6355 | 10510884 | <a href="#">ENSMUST00000071251</a> | <a href="#">230971</a> | multiple EGF-like-domains 6    | <a href="#">Megf6</a>         | 1.039 | 0.275  | 0.790694 | 0.914692 |
| 6356 | 10577858 | <a href="#">NM_026121</a>          | <a href="#">67384</a>  | BCL2-associated athanogene 4   | <a href="#">Bag4</a>          | 1.039 | 0.064  | 0.951027 | 0.981095 |
| 6357 | 10516637 | <a href="#">NM_182783</a>          | <a href="#">230766</a> | cDNA sequence BC030183         | <a href="#">BC030183</a>      | 1.039 | 1.154  | 0.285237 | 0.560506 |
| 6358 | 10504402 | <a href="#">NM_001085508</a>       | <a href="#">242409</a> | RIKEN cDNA 4930500O05 gene     | <a href="#">4930500O05Rik</a> | 1.039 | 0.402  | 0.699623 | 0.868422 |
| 6359 | 10597309 | <a href="#">NM_016853</a>          | <a href="#">20840</a>  | src homology three (SH3) and c | <a href="#">Stac</a>          | 1.039 | 1.286  | 0.238042 | 0.51041  |
| 6360 | 10454741 | <a href="#">NM_001081256</a>       | <a href="#">277250</a> | jumonji domain containing 1B   | <a href="#">Jmjd1b</a>        | 1.039 | 0.815  | 0.4413   | 0.700287 |
| 6361 | 10480971 | <a href="#">NM_172339</a>          | <a href="#">227644</a> | small nuclear RNA activating c | <a href="#">Snape4</a>        | 1.039 | 0.78   | 0.460144 | 0.714915 |
| 6362 | 10597173 | <a href="#">NM_026012</a>          | <a href="#">67169</a>  | neurotrophin receptor associat | <a href="#">Nradd</a>         | 1.039 | 0.842  | 0.426712 | 0.68818  |
| 6363 | 10463462 | <a href="#">NM_053197</a>          | <a href="#">94280</a>  | sideroflexin 3                 | <a href="#">Sfxn3</a>         | 1.039 | 0.486  | 0.641367 | 0.837465 |
| 6364 | 10385428 | <a href="#">NM_010583</a>          | <a href="#">16428</a>  | IL2-inducible T-cell kinase    | <a href="#">Itk</a>           | 1.039 | 0.337  | 0.74585  | 0.891987 |
| 6365 | 10511952 | <a href="#">NM_015824</a>          | <a href="#">50793</a>  | origin recognition complex, su | <a href="#">Orc3l</a>         | 1.039 | 0.286  | 0.783248 | 0.911971 |
| 6366 | 10584870 | <a href="#">NM_001013373</a>       | <a href="#">214531</a> | transmembrane protease, serine | <a href="#">Tmprss13</a>      | 1.039 | 0.817  | 0.439923 | 0.699115 |
| 6367 | 10458247 | <a href="#">NM_178005</a>          | <a href="#">107065</a> | leucine rich repeat transmembr | <a href="#">Lrrtm2</a>        | 1.039 | 0.426  | 0.682855 | 0.859827 |
| 6368 | 10572906 | <a href="#">NM_008566</a>          | <a href="#">17218</a>  | minichromosome maintenance def | <a href="#">Mcm5</a>          | 1.039 | 0.051  | 0.960974 | 0.985069 |
| 6369 | 10537797 |                                    |                        |                                |                               | 1.039 | 0.606  | 0.563024 | 0.789853 |
| 6370 | 10455863 | <a href="#">ENSMUST00000091892</a> | <a href="#">629147</a> | cortexin 3                     | <a href="#">Ctxn3</a>         | 1.038 | 0.583  | 0.577495 | 0.797771 |
| 6371 | 10566620 | <a href="#">NM_147035</a>          | <a href="#">259037</a> | olfactory receptor 711         | <a href="#">Olfr711</a>       | 1.038 | 0.456  | 0.661665 | 0.84929  |
| 6372 | 10431839 | <a href="#">NM_207533</a>          | <a href="#">223843</a> | developing brain homeobox 2    | <a href="#">Dbx2</a>          | 1.038 | 0.712  | 0.498888 | 0.742429 |
| 6373 | 10383345 | <a href="#">NM_172802</a>          | <a href="#">238021</a> | fascin homolog 2, actin-bundli | <a href="#">Fscn2</a>         | 1.038 | 0.168  | 0.871179 | 0.948575 |
| 6374 | 10436873 | <a href="#">NM_178880</a>          | <a href="#">20658</a>  | Son cell proliferation protein | <a href="#">Son</a>           | 1.038 | 0.619  | 0.55507  | 0.783898 |
| 6375 | 10368380 | <a href="#">NM_172787</a>          | <a href="#">237339</a> | l(3)mbt-like 3 (Drosophila)    | <a href="#">L3mbtl3</a>       | 1.038 | 0.49   | 0.638532 | 0.835923 |
| 6376 | 10544829 | <a href="#">NM_173406</a>          | <a href="#">231986</a> | JAZF zinc finger 1             | <a href="#">Jazf1</a>         | 1.038 | 0.913  | 0.390895 | 0.659256 |
| 6377 | 10477423 | <a href="#">NM_001034875</a>       | <a href="#">381399</a> | gene model 1006, (NCBI)        | <a href="#">Gm1006</a>        | 1.038 | 0.642  | 0.540496 | 0.772962 |
| 6378 | 10380732 | <a href="#">NM_026154</a>          | <a href="#">107732</a> | mitochondrial ribosomal protei | <a href="#">Mrpl10</a>        | 1.038 | 0.508  | 0.626335 | 0.82988  |
| 6379 | 10475525 | <a href="#">NM_019788</a>          | <a href="#">18457</a>  | pallidin                       | <a href="#">Pldn</a>          | 1.038 | 0.327  | 0.753031 | 0.895959 |
| 6380 | 10569456 |                                    |                        |                                |                               | 1.038 | 1.258  | 0.247698 | 0.520853 |
| 6381 | 10533034 | <a href="#">NM_177759</a>          | <a href="#">269693</a> | coiled-coil domain containing  | <a href="#">Ccdc60</a>        | 1.038 | 0.218  | 0.833653 | 0.932929 |

|      |          |                                    |                           |                                       |                                    |       |        |          |          |
|------|----------|------------------------------------|---------------------------|---------------------------------------|------------------------------------|-------|--------|----------|----------|
| 6382 | 10413282 | <a href="#">BC025603</a>           | <a href="#">211922</a>    | RIKEN cDNA A630054L15 gene            | <a href="#">A630054L15Rik</a>      | 1.038 | 0.404  | 0.697589 | 0.86736  |
| 6383 | 10544801 | <a href="#">NM_010450</a>          | <a href="#">15396</a>     | homeo box A11                         | <a href="#">Hoxa11</a>             | 1.038 | 0.934  | 0.973994 | 0.988867 |
| 6384 | 10350343 | <a href="#">NM_177397</a>          | <a href="#">538375</a>    | ATPase, H+ transporting, lysos        | <a href="#">Atp6v1g3</a>           | 1.038 | 0.382  | 0.713295 | 0.874568 |
| 6385 | 10523974 | <a href="#">ENSMUST00000100944</a> | <a href="#">100038441</a> | predicted gene, ENSMUSG0000007        | <a href="#">ENSMUSG00000072769</a> | 1.038 | 0.903  | 0.395726 | 0.663394 |
| 6386 | 10489904 | <a href="#">NM_170756</a>          | <a href="#">263876</a>    | spermatogenesis associated 2          | <a href="#">Spata2</a>             | 1.038 | 0.366  | 0.724989 | 0.880785 |
| 6387 | 10545210 | <a href="#">ENSMUST00000103359</a> | <a href="#">385253</a>    | gene model 1524, (NCBI)               | <a href="#">Gm1524</a>             | 1.038 | 1.052  | 0.326715 | 0.602834 |
| 6388 | 10505109 | <a href="#">BC026590</a>           | <a href="#">230234</a>    | cDNA sequence BC026590                | <a href="#">BC026590</a>           | 1.038 | 0.265  | 0.798508 | 0.918438 |
| 6389 | 10526520 | <a href="#">NM_011962</a>          | <a href="#">26433</a>     | procollagen-lysine, 2-oxogluta        | <a href="#">Plod3</a>              | 1.038 | 0.115  | 0.911357 | 0.964566 |
| 6390 | 10377018 | <a href="#">NM_001099635</a>       | <a href="#">17883</a>     | myosin, heavy polypeptide 3, s        | <a href="#">Myh3</a>               | 1.038 | 1.353  | 0.21708  | 0.484682 |
| 6391 | 10429442 | <a href="#">ENSMUST00000110021</a> | <a href="#">268816</a>    | gene model 628, (NCBI)                | <a href="#">Gm628</a>              | 1.038 | 1.039  | 0.33243  | 0.608511 |
| 6392 | 10552262 |                                    |                           |                                       |                                    | 1.038 | 0.338  | 0.744936 | 0.891598 |
| 6393 | 10399087 | <a href="#">NM_133762</a>          | <a href="#">76044</a>     | non-SMC condensin II complex,         | <a href="#">Ncapg2</a>             | 1.038 | 0.619  | 0.554797 | 0.783816 |
| 6394 | 10377286 | <a href="#">NM_001081566</a>       | <a href="#">104709</a>    | phosphoinositide-3-kinase, reg        | <a href="#">Pik3r6</a>             | 1.038 | 0.894  | 0.400213 | 0.666098 |
| 6395 | 10467001 |                                    |                           |                                       |                                    | 1.038 | 0.614  | 0.557806 | 0.785788 |
| 6396 | 10394144 | <a href="#">ENSMUST00000035629</a> | <a href="#">74173</a>     | RIKEN cDNA 1700012B15 gene            | <a href="#">1700012B15Rik</a>      | 1.038 | 1.004  | 0.348041 | 0.622132 |
| 6397 | 10373778 | <a href="#">NM_198162</a>          | <a href="#">74522</a>     | microchidia 2A                        | <a href="#">More2a</a>             | 1.038 | 0.154  | 0.882005 | 0.953432 |
| 6398 | 10380524 | <a href="#">NM_016752</a>          | <a href="#">110172</a>    | solute carrier family 35, memb        | <a href="#">Slc35b1</a>            | 1.038 | 0.293  | 0.777695 | 0.909562 |
| 6399 | 10366238 | <a href="#">NM_027892</a>          | <a href="#">17931</a>     | protein phosphatase 1, regulat        | <a href="#">Ppp1r12a</a>           | 1.038 | 0.55   | 0.598685 | 0.811605 |
| 6400 | 10515819 |                                    |                           |                                       |                                    | 1.038 | 0.638  | 0.543031 | 0.775486 |
| 6401 | 10589610 | <a href="#">NM_153099</a>          | <a href="#">235628</a>    | testis serine protease 2              | <a href="#">Tessp2</a>             | 1.038 | 0.318  | 0.759277 | 0.899156 |
| 6402 | 10371578 | <a href="#">NM_008553</a>          | <a href="#">17172</a>     | achaete-scute complex homolog         | <a href="#">Ascl1</a>              | 1.038 | 0.247  | 0.811579 | 0.923946 |
| 6403 | 10577808 | <a href="#">NM_177089</a>          | <a href="#">320165</a>    | transforming, acidic coiled-co        | <a href="#">Tacc1</a>              | 1.038 | 0.499  | 0.632591 | 0.832846 |
| 6404 | 10534014 |                                    |                           |                                       |                                    | 1.038 | 0.306  | 0.768311 | 0.903712 |
| 6405 | 10443244 | <a href="#">NM_181413</a>          | <a href="#">224650</a>    | ankyrin repeat and SAM domain         | <a href="#">Anks1</a>              | 1.038 | 0.777  | 0.46167  | 0.716287 |
| 6406 | 10384092 | <a href="#">NM_173748</a>          | <a href="#">209586</a>    | NudC domain containing 3              | <a href="#">Nudcd3</a>             | 1.038 | 1.02   | 0.340838 | 0.615921 |
| 6407 | 10391061 | <a href="#">NM_008470</a>          | <a href="#">16666</a>     | keratin 16                            | <a href="#">Krt16</a>              | 1.038 | 0.433  | 0.677614 | 0.856701 |
| 6408 | 10490203 |                                    |                           |                                       |                                    | 1.038 | 0.353  | 0.73448  | 0.886559 |
| 6409 | 10493347 | <a href="#">NM_138679</a>          | <a href="#">192195</a>    | ash1 (absent, small, or homeot        | <a href="#">Ash1l</a>              | 1.038 | 0.437  | 0.674966 | 0.855557 |
| 6410 | 10370914 | <a href="#">BC005632</a>           | <a href="#">216169</a>    | DNA segment, Chr 10, Brigham &        | <a href="#">D10Bwg1364e</a>        | 1.038 | 0.402  | 0.699583 | 0.868422 |
| 6411 | 10603896 | <a href="#">NM_026167</a>          | <a href="#">67455</a>     | kelch-like 13 (Drosophila)            | <a href="#">Klhl13</a>             | 1.038 | -0.144 | 0.889067 | 0.95642  |
| 6412 | 10579219 | <a href="#">NM_001024922</a>       | <a href="#">234374</a>    | DEAD (Asp-Glu-Ala-Asp) box pol        | <a href="#">Ddx49</a>              | 1.038 | -0.156 | 0.880662 | 0.952661 |
| 6413 | 10472044 |                                    |                           |                                       |                                    | 1.038 | 1.053  | 0.326333 | 0.602796 |
| 6414 | 10421325 | <a href="#">NM_021308</a>          | <a href="#">57746</a>     | piwi-like homolog 2 (Drosophil        | <a href="#">Piwil2</a>             | 1.038 | 1.128  | 0.295354 | 0.571726 |
| 6415 | 10541114 | <a href="#">BC145752</a>           | <a href="#">70727</a>     | RasGEF domain family, member 1        | <a href="#">Rasgef1a</a>           | 1.038 | 1.048  | 0.328311 | 0.604687 |
| 6416 | 10440302 | <a href="#">NM_008310</a>          | <a href="#">15557</a>     | 5-hydroxytryptamine (serotonin        | <a href="#">Htr1f</a>              | 1.038 | 1.009  | 0.345541 | 0.619665 |
| 6417 | 10528880 | <a href="#">NM_020295</a>          | <a href="#">56873</a>     | limb region 1                         | <a href="#">Lmbr1</a>              | 1.038 | 0.469  | 0.652897 | 0.844541 |
| 6418 | 10426292 | <a href="#">NM_001033441</a>       | <a href="#">380959</a>    | asparagine-linked glycosylatio        | <a href="#">Alg10b</a>             | 1.038 | -0.037 | 0.971473 | 0.988148 |
| 6419 | 10361089 | <a href="#">NM_001109759</a>       | <a href="#">619288</a>    | RIKEN cDNA 4933417M04 gene            | <a href="#">4933417M04Rik</a>      | 1.038 | 0.404  | 0.697862 | 0.867567 |
| 6420 | 10521261 | <a href="#">NM_010414</a>          | <a href="#">15194</a>     | huntingtin                            | <a href="#">Htt</a>                | 1.038 | 0.841  | 0.427276 | 0.688539 |
| 6421 | 10345037 | <a href="#">NM_028829</a>          | <a href="#">74229</a>     | progesterone and adiponectin receptor | <a href="#">Paqr8</a>              | 1.038 | 0.562  | 0.591016 | 0.806534 |
| 6422 | 10568252 | <a href="#">NM_175163</a>          | <a href="#">71131</a>     | zinc finger protein 689               | <a href="#">Zfp689</a>             | 1.038 | 0.502  | 0.630741 | 0.831809 |
| 6423 | 10413598 | <a href="#">NM_028839</a>          | <a href="#">69179</a>     | transmembrane protein 110             | <a href="#">Tmem110</a>            | 1.038 | -0.179 | 0.862774 | 0.945192 |
| 6424 | 10511739 | <a href="#">NM_027769</a>          | <a href="#">70568</a>     | copine III                            | <a href="#">Cpne3</a>              | 1.037 | -0.007 | 0.994586 | 0.997747 |
| 6425 | 10376555 | <a href="#">AK144909</a>           | <a href="#">100038754</a> | predicted gene, ENSMUSG0000007        | <a href="#">ENSMUSG00000072890</a> | 1.037 | 0.48   | 0.645371 | 0.839892 |
| 6426 | 10395684 | <a href="#">NM_029760</a>          | <a href="#">76826</a>     | nucleotide binding protein-lik        | <a href="#">Nubpl</a>              | 1.037 | -0.383 | 0.712825 | 0.874143 |
| 6427 | 10404178 | <a href="#">NM_024473</a>          | <a href="#">79555</a>     | cDNA sequence BC005537                | <a href="#">BC005537</a>           | 1.037 | 0.4    | 0.700626 | 0.86896  |
| 6428 | 10383799 | <a href="#">NM_015749</a>          | <a href="#">21452</a>     | transcobalamin 2                      | <a href="#">Ten2</a>               | 1.037 | 0.037  | 0.971561 | 0.988148 |
| 6429 | 10591430 | <a href="#">NM_027911</a>          | <a href="#">71766</a>     | ribonucleoprotein, PTB-binding        | <a href="#">Raver1</a>             | 1.037 | 0.957  | 0.369644 | 0.640215 |
| 6430 | 10391742 | <a href="#">ENSMUST00000069673</a> | <a href="#">100038535</a> | predicted gene, ENSMUSG0000007        | <a href="#">ENSMUSG00000075516</a> | 1.037 | 0.069  | 0.946672 | 0.978837 |
| 6431 | 10504690 |                                    |                           |                                       |                                    | 1.037 | 0.409  | 0.694147 | 0.865705 |

|      |          |                                    |                           |                                |                                    |       |        |          |          |
|------|----------|------------------------------------|---------------------------|--------------------------------|------------------------------------|-------|--------|----------|----------|
| 6432 | 10561369 | <a href="#">NM_175033</a>          | <a href="#">280621</a>    | cDNA sequence BC089491         | <a href="#">BC089491</a>           | 1.037 | 0.398  | 0.702255 | 0.869368 |
| 6433 | 10501622 | <a href="#">NM_022427</a>          | <a href="#">64378</a>     | G-protein coupled receptor 88  | <a href="#">Gpr88</a>              | 1.037 | 0.624  | 0.551718 | 0.781715 |
| 6434 | 10481349 | <a href="#">NM_133501</a>          | <a href="#">171171</a>    | netrin G2                      | <a href="#">Ntng2</a>              | 1.037 | 0.753  | 0.475566 | 0.72707  |
| 6435 | 10408162 | <a href="#">NM_001111107</a>       | <a href="#">218100</a>    | zinc finger protein 322a       | <a href="#">Zfp322a</a>            | 1.037 | 0.054  | 0.958682 | 0.984334 |
| 6436 | 10398195 | <a href="#">NM_009832</a>          | <a href="#">12454</a>     | cyclin K                       | <a href="#">Ccnk</a>               | 1.037 | 0.12   | 0.907817 | 0.963723 |
| 6437 | 10382470 | <a href="#">NM_001033393</a>       | <a href="#">320534</a>    | transmembrane protein 104      | <a href="#">Tmem104</a>            | 1.037 | 0.331  | 0.750124 | 0.894442 |
| 6438 | 10407356 | <a href="#">NM_008710</a>          | <a href="#">18115</a>     | nicotinamide nucleotide transh | <a href="#">Nnt</a>                | 1.037 | 0.483  | 0.643656 | 0.838716 |
| 6439 | 10362210 | <a href="#">NM_027347</a>          | <a href="#">70208</a>     | mediator complex subunit 23    | <a href="#">Med23</a>              | 1.037 | 0.274  | 0.791577 | 0.915198 |
| 6440 | 10461214 | <a href="#">BC066781</a>           | <a href="#">66836</a>     | RIKEN cDNA 0610006I08 gene     | <a href="#">0610006I08Rik</a>      | 1.037 | 0.162  | 0.875461 | 0.950704 |
| 6441 | 10588464 |                                    |                           |                                |                                    | 1.037 | 0.412  | 0.692287 | 0.865004 |
| 6442 | 10386402 | <a href="#">NM_172941</a>          | <a href="#">268417</a>    | zinc finger with KRAB and SCAN | <a href="#">Zkscan17</a>           | 1.037 | 1.345  | 0.219356 | 0.488013 |
| 6443 | 10400989 | <a href="#">NM_172805</a>          | <a href="#">238271</a>    | potassium voltage-gated channe | <a href="#">Kcnh5</a>              | 1.037 | 0.488  | 0.640284 | 0.836929 |
| 6444 | 10426782 | <a href="#">NM_009597</a>          | <a href="#">11419</a>     | amiloride-sensitive cation cha | <a href="#">Accn2</a>              | 1.037 | 0.587  | 0.575113 | 0.797076 |
| 6445 | 10565890 | <a href="#">NM_153527</a>          | <a href="#">69387</a>     | DnaJ (Hsp40) related, subfamil | <a href="#">Dnajb13</a>            | 1.037 | 0.884  | 0.405186 | 0.669695 |
| 6446 | 10372687 | <a href="#">NM_134010</a>          | <a href="#">103468</a>    | nucleoporin 107                | <a href="#">Nup107</a>             | 1.037 | 0.261  | 0.801693 | 0.919646 |
| 6447 | 10528901 | <a href="#">AK147752</a>           | <a href="#">97236</a>     | expressed sequence C79130      | <a href="#">C79130</a>             | 1.037 | 0.756  | 0.473407 | 0.725045 |
| 6448 | 10456435 |                                    |                           |                                |                                    | 1.037 | 0.288  | 0.781479 | 0.911143 |
| 6449 | 10474642 | <a href="#">BC052040</a>           | <a href="#">399568</a>    | cDNA sequence BC052040         | <a href="#">BC052040</a>           | 1.037 | 0.905  | 0.394505 | 0.662113 |
| 6450 | 10473097 | <a href="#">NM_031256</a>          | <a href="#">83435</a>     | pleckstrin homology domain-con | <a href="#">Plekha3</a>            | 1.037 | -0.06  | 0.953571 | 0.982042 |
| 6451 | 10364744 | <a href="#">NM_029272</a>          | <a href="#">75406</a>     | NADH dehydrogenase (ubiquinone | <a href="#">Ndufs7</a>             | 1.037 | -0.013 | 0.990123 | 0.995679 |
| 6452 | 10543904 | <a href="#">NM_016877</a>          | <a href="#">53621</a>     | CCR4-NOT transcription complex | <a href="#">Cnot4</a>              | 1.037 | 0.439  | 0.673802 | 0.855069 |
| 6453 | 10483631 | <a href="#">XM_911155</a>          | <a href="#">383712</a>    | similar to putative translatio | <a href="#">LOC383712</a>          | 1.037 | 0.2    | 0.846932 | 0.938058 |
| 6454 | 10380506 | <a href="#">NM_053093</a>          | <a href="#">93670</a>     | tachykinin 4                   | <a href="#">Tac4</a>               | 1.037 | 0.785  | 0.457368 | 0.713005 |
| 6455 | 10573939 | <a href="#">NM_173014</a>          | <a href="#">270084</a>    | lysophosphatidylcholine acyltr | <a href="#">Lpcat2</a>             | 1.037 | 0.764  | 0.469255 | 0.721467 |
| 6456 | 10515706 | <a href="#">ENSMUST00000075406</a> | <a href="#">230676</a>    | cDNA sequence BC059842         | <a href="#">BC059842</a>           | 1.037 | 1.277  | 0.241046 | 0.513985 |
| 6457 | 10451093 | <a href="#">NM_027649</a>          | <a href="#">71020</a>     | spermatogenesis associated, se | <a href="#">Spats1</a>             | 1.037 | 0.558  | 0.594027 | 0.808348 |
| 6458 | 10435237 | <a href="#">NM_011749</a>          | <a href="#">22661</a>     | zinc finger protein 148        | <a href="#">Zfp148</a>             | 1.037 | 0.166  | 0.87277  | 0.949165 |
| 6459 | 10409848 | <a href="#">NM_027344</a>          | <a href="#">70202</a>     | RIKEN cDNA 2310051M13 gene     | <a href="#">2310051M13Rik</a>      | 1.037 | 0.772  | 0.464844 | 0.718627 |
| 6460 | 10535653 | <a href="#">NM_023322</a>          | <a href="#">67235</a>     | zinc finger with KRAB and SCAN | <a href="#">Zkscan14</a>           | 1.037 | 0.407  | 0.695499 | 0.866211 |
| 6461 | 10360090 | <a href="#">NM_008911</a>          | <a href="#">19044</a>     | protoporphyrinogen oxidase     | <a href="#">Ppox</a>               | 1.037 | 0.323  | 0.756215 | 0.897871 |
| 6462 | 10514335 | <a href="#">NM_177348</a>          | <a href="#">230405</a>    | interferon epsilon 1           | <a href="#">Ifne1</a>              | 1.037 | 0.588  | 0.574454 | 0.797076 |
| 6463 | 10479458 | <a href="#">BC059022</a>           | <a href="#">76425</a>     | RIKEN cDNA 2310003C23 gene     | <a href="#">2310003C23Rik</a>      | 1.037 | 0.505  | 0.62876  | 0.83101  |
| 6464 | 10512895 | <a href="#">NM_007519</a>          | <a href="#">12012</a>     | bile acid-Coenzyme A: amino ac | <a href="#">Baat</a>               | 1.037 | 0.903  | 0.395634 | 0.663394 |
| 6465 | 10455078 | <a href="#">NM_053133</a>          | <a href="#">93879</a>     | protocadherin beta 8           | <a href="#">Pcdhb8</a>             | 1.037 | 0.527  | 0.614224 | 0.821474 |
| 6466 | 10442032 | <a href="#">BC002059</a>           | <a href="#">213811</a>    | cDNA sequence BC002059         | <a href="#">BC002059</a>           | 1.037 | -0.046 | 0.964542 | 0.985942 |
| 6467 | 10387985 | <a href="#">NM_001045526</a>       | <a href="#">327957</a>    | RIKEN cDNA A430084P05 gene     | <a href="#">A430084P05Rik</a>      | 1.037 | 0.706  | 0.502549 | 0.745467 |
| 6468 | 10498477 | <a href="#">BC125500</a>           | <a href="#">329659</a>    | RIKEN cDNA E130311K13 gene     | <a href="#">E130311K13Rik</a>      | 1.037 | 0.235  | 0.82045  | 0.928587 |
| 6469 | 10493245 | <a href="#">NM_001029890</a>       | <a href="#">72640</a>     | mex3 homolog A (C. elegans)    | <a href="#">Mex3a</a>              | 1.037 | 0.399  | 0.701584 | 0.869143 |
| 6470 | 10345824 | <a href="#">NM_010553</a>          | <a href="#">16174</a>     | interleukin 18 receptor access | <a href="#">Il18rap</a>            | 1.037 | 0.832  | 0.431852 | 0.692274 |
| 6471 | 10450344 | <a href="#">NM_013484</a>          | <a href="#">12263</a>     | complement component 2 (within | <a href="#">C2</a>                 | 1.037 | 0.593  | 0.571244 | 0.795362 |
| 6472 | 10476102 |                                    |                           |                                |                                    | 1.037 | 0.432  | 0.67837  | 0.857067 |
| 6473 | 10547022 | <a href="#">NM_080639</a>          | <a href="#">110595</a>    | tissue inhibitor of metallopro | <a href="#">Timp4</a>              | 1.037 | 1.278  | 0.2407   | 0.513714 |
| 6474 | 10522606 | <a href="#">NM_027270</a>          | <a href="#">69940</a>     | exocyst complex component 1    | <a href="#">Exoc1</a>              | 1.036 | 0.131  | 0.899708 | 0.960245 |
| 6475 | 10455069 | <a href="#">NM_053131</a>          | <a href="#">93877</a>     | protocadherin beta 6           | <a href="#">Pcdhb6</a>             | 1.036 | 0.895  | 0.399444 | 0.665621 |
| 6476 | 10498158 | <a href="#">ENSMUST00000099099</a> | <a href="#">100038482</a> | predicted gene, ENSMUSG0000007 | <a href="#">ENSMUSG00000074598</a> | 1.036 | -0.328 | 0.752456 | 0.895764 |
| 6477 | 10544858 | <a href="#">ENSMUST00000046683</a> | <a href="#">378878</a>    | RIKEN cDNA 9130019P16 gene     | <a href="#">9130019P16Rik</a>      | 1.036 | 0.878  | 0.408214 | 0.672667 |
| 6478 | 10357660 | <a href="#">NM_001114662</a>       | <a href="#">213006</a>    | major facilitator superfamily  | <a href="#">Mfsd4</a>              | 1.036 | 0.864  | 0.415492 | 0.678653 |
| 6479 | 10466620 | <a href="#">XM_891145</a>          | <a href="#">626549</a>    | predicted gene, EG626549       | <a href="#">EG626549</a>           | 1.036 | 0.471  | 0.651352 | 0.843859 |
| 6480 | 10514219 |                                    |                           |                                |                                    | 1.036 | 0.231  | 0.823491 | 0.929428 |

|      |          |                                    |                           |                                |                                    |       |        |          |          |
|------|----------|------------------------------------|---------------------------|--------------------------------|------------------------------------|-------|--------|----------|----------|
| 6481 | 10525460 | <a href="#">ENSMUST00000071046</a> | <a href="#">109202</a>    | RIKEN cDNA A930024E05 gene     | <a href="#">A930024E05Rik</a>      | 1.036 | 0.769  | 0.466196 | 0.719571 |
| 6482 | 10485989 | <a href="#">NM_009702</a>          | <a href="#">11834</a>     | aquarius                       | <a href="#">Aqr</a>                | 1.036 | 0.164  | 0.874384 | 0.949978 |
| 6483 | 10596372 | <a href="#">NM_001085516</a>       | <a href="#">332923</a>    | novel protein similar to Prame | <a href="#">RP23-149D11.5</a>      | 1.036 | 0.867  | 0.413723 | 0.677729 |
| 6484 | 10375175 | <a href="#">NM_011412</a>          | <a href="#">20564</a>     | slit homolog 3 (Drosophila)    | <a href="#">Slit3</a>              | 1.036 | 0.589  | 0.586667 | 0.803716 |
| 6485 | 10379518 | <a href="#">NM_013654</a>          | <a href="#">20306</a>     | chemokine (C-C motif) ligand 7 | <a href="#">Ccl7</a>               | 1.036 | 0.251  | 0.808576 | 0.922966 |
| 6486 | 10423593 | <a href="#">NM_033521</a>          | <a href="#">114128</a>    | lysosomal-associated protein t | <a href="#">Laptm4b</a>            | 1.036 | -0.022 | 0.98314  | 0.992718 |
| 6487 | 10465185 | <a href="#">NM_001114597</a>       | <a href="#">114601</a>    | EH domain binding protein 1-li | <a href="#">Ehbp11</a>             | 1.036 | 0.828  | 0.434358 | 0.694762 |
| 6488 | 10487033 | <a href="#">NM_010852</a>          | <a href="#">17876</a>     | myelin basic protein expressio | <a href="#">Myef2</a>              | 1.036 | 0.605  | 0.563573 | 0.790198 |
| 6489 | 10384154 | <a href="#">NM_178440</a>          | <a href="#">246177</a>    | myosin IG                      | <a href="#">Myo1g</a>              | 1.036 | 0.885  | 0.404858 | 0.669594 |
| 6490 | 10433953 | <a href="#">NM_023249</a>          | <a href="#">106369</a>    | yippee-like 1 (Drosophila)     | <a href="#">Ypel1</a>              | 1.036 | 0.674  | 0.52116  | 0.758676 |
| 6491 | 10598164 | <a href="#">NM_027861</a>          | <a href="#">71678</a>     | RIKEN cDNA 0610010K06 gene     | <a href="#">0610010K06Rik</a>      | 1.036 | 0.185  | 0.858086 | 0.943002 |
| 6492 | 10477604 | <a href="#">NM_008395</a>          | <a href="#">16396</a>     | itchy, E3 ubiquitin protein li | <a href="#">Itch</a>               | 1.036 | 0.863  | 0.416014 | 0.67919  |
| 6493 | 10387180 | <a href="#">NM_023668</a>          | <a href="#">83431</a>     | nuclear distribution gene E-li | <a href="#">Ndel1</a>              | 1.036 | 0.55   | 0.599061 | 0.811784 |
| 6494 | 10607738 | <a href="#">NM_181315</a>          | <a href="#">56078</a>     | carbonic anhydrase 5b, mitocho | <a href="#">Car5b</a>              | 1.036 | 0.773  | 0.464039 | 0.717953 |
| 6495 | 10573232 |                                    |                           |                                |                                    | 1.036 | 0.468  | 0.653636 | 0.844772 |
| 6496 | 10516974 | <a href="#">NM_146154</a>          | <a href="#">100336</a>    | protein phosphatase 1, regulat | <a href="#">Ppp1r8</a>             | 1.036 | 0.101  | 0.92267  | 0.969147 |
| 6497 | 10573110 |                                    |                           |                                |                                    | 1.036 | 0.471  | 0.651709 | 0.844083 |
| 6498 | 10563362 | <a href="#">NM_020011</a>          | <a href="#">56632</a>     | sphingosine kinase 2           | <a href="#">Sphk2</a>              | 1.036 | 0.686  | 0.514296 | 0.754529 |
| 6499 | 10497960 | <a href="#">BC117739</a>           | <a href="#">73297</a>     | RIKEN cDNA 1700034I23 gene     | <a href="#">1700034I23Rik</a>      | 1.036 | 0.091  | 0.929672 | 0.972207 |
| 6500 | 10427744 | <a href="#">NM_030690</a>          | <a href="#">75646</a>     | retinoic acid induced 14       | <a href="#">Rai14</a>              | 1.036 | 0.219  | 0.83282  | 0.932703 |
| 6501 | 10476882 | <a href="#">ENSMUST00000063608</a> | <a href="#">381384</a>    | RIKEN cDNA A530006G24 gene     | <a href="#">A530006G24Rik</a>      | 1.036 | 1.269  | 0.243958 | 0.517035 |
| 6502 | 10412646 |                                    |                           |                                |                                    | 1.036 | 0.379  | 0.715262 | 0.875355 |
| 6503 | 10525555 | <a href="#">NM_133917</a>          | <a href="#">208104</a>    | MLX interacting protein        | <a href="#">Mlxip</a>              | 1.036 | 0.507  | 0.627485 | 0.83052  |
| 6504 | 10496569 | <a href="#">NM_001083312</a>       | <a href="#">229900</a>    | guanylate binding protein 6    | <a href="#">Gbp6</a>               | 1.036 | 0.971  | 0.363093 | 0.634368 |
| 6505 | 10373502 | <a href="#">NM_011772</a>          | <a href="#">22781</a>     | IKAROS family zinc finger 4    | <a href="#">Ikzf4</a>              | 1.036 | 0.336  | 0.746766 | 0.892467 |
| 6506 | 10361184 | <a href="#">ENSMUST00000057543</a> | <a href="#">320952</a>    | RIKEN cDNA A730013G03 gene     | <a href="#">A730013G03Rik</a>      | 1.036 | 0.886  | 0.404391 | 0.668997 |
| 6507 | 10363195 | <a href="#">NM_008297</a>          | <a href="#">15500</a>     | heat shock factor 2            | <a href="#">Hsf2</a>               | 1.036 | 0.634  | 0.545772 | 0.777543 |
| 6508 | 10590494 | <a href="#">NM_010620</a>          | <a href="#">209737</a>    | kinesin family member 15       | <a href="#">Kif15</a>              | 1.036 | 0.444  | 0.670325 | 0.853559 |
| 6509 | 10446109 | <a href="#">ENSMUST00000095224</a> | <a href="#">224903</a>    | scaffold attachment factor B   | <a href="#">Safb</a>               | 1.036 | 0.358  | 0.730449 | 0.883456 |
| 6510 | 10573916 | <a href="#">NM_022428</a>          | <a href="#">64379</a>     | Iroquois related homeobox 6 (D | <a href="#">Irx6</a>               | 1.036 | 0.783  | 0.458622 | 0.713672 |
| 6511 | 10607317 | <a href="#">NM_175146</a>          | <a href="#">69499</a>     | TSR2, 20S rRNA accumulation, h | <a href="#">Tsr2</a>               | 1.036 | 0.059  | 0.954711 | 0.982671 |
| 6512 | 10464298 | <a href="#">NM_026925</a>          | <a href="#">69060</a>     | pancreatic lipase              | <a href="#">Pnlip</a>              | 1.036 | 0.582  | 0.578462 | 0.798316 |
| 6513 | 10598126 | <a href="#">BC034362</a>           | <a href="#">78772</a>     | hedgehog interacting protein-1 | <a href="#">Hhip12</a>             | 1.036 | 0.862  | 0.416439 | 0.67936  |
| 6514 | 10539813 | <a href="#">ENSMUST00000089503</a> | <a href="#">100043118</a> | similar to coiled-coil domain  | <a href="#">LOC100043118</a>       | 1.036 | 0.846  | 0.424726 | 0.686726 |
| 6515 | 10378568 |                                    |                           |                                |                                    | 1.036 | 0.18   | 0.862413 | 0.944945 |
| 6516 | 10423078 | <a href="#">ENSMUST00000100773</a> | <a href="#">100038608</a> | predicted gene, ENSMUSG0000007 | <a href="#">ENSMUSG00000072658</a> | 1.036 | 0.703  | 0.504083 | 0.746397 |
| 6517 | 10480432 | <a href="#">NM_025979</a>          | <a href="#">67121</a>     | microtubule associated serine/ | <a href="#">Mastl</a>              | 1.036 | 0.166  | 0.872887 | 0.949165 |
| 6518 | 10472949 | <a href="#">NM_008274</a>          | <a href="#">15432</a>     | homeo box D12                  | <a href="#">Hoxd12</a>             | 1.036 | 1.04   | 0.33203  | 0.608173 |
| 6519 | 10358698 | <a href="#">NM_011277</a>          | <a href="#">19821</a>     | ring finger protein 2          | <a href="#">Rnf2</a>               | 1.036 | -0.132 | 0.898239 | 0.960023 |
| 6520 | 10405779 |                                    |                           |                                |                                    | 1.036 | 0.578  | 0.580647 | 0.79961  |
| 6521 | 10385747 | <a href="#">NM_199299</a>          | <a href="#">76901</a>     | PHD finger protein 15          | <a href="#">Phf15</a>              | 1.036 | 0.799  | 0.44998  | 0.707284 |
| 6522 | 10364824 | <a href="#">NM_134002</a>          | <a href="#">103236</a>    | casein kinase 1, gamma 2       | <a href="#">Csnk1g2</a>            | 1.036 | 0.371  | 0.720958 | 0.878601 |
| 6523 | 10424188 | <a href="#">NM_134092</a>          | <a href="#">105837</a>    | Mdm2, transformed 3T3 cell dou | <a href="#">Mtbp</a>               | 1.036 | 0.254  | 0.806376 | 0.921832 |
| 6524 | 10545458 | <a href="#">NM_001079822</a>       | <a href="#">21415</a>     | transcription factor 3         | <a href="#">Tcf3</a>               | 1.036 | 0.398  | 0.702356 | 0.869396 |
| 6525 | 10479463 | <a href="#">NM_183161</a>          | <a href="#">228993</a>    | RIKEN cDNA 1700019H03 gene     | <a href="#">1700019H03Rik</a>      | 1.036 | 0.839  | 0.428183 | 0.689212 |
| 6526 | 10457665 | <a href="#">AK076609</a>           | <a href="#">664619</a>    | Riken cDNA 4921533I20 gene     | <a href="#">4921533I20Rik</a>      | 1.035 | 0.72   | 0.494223 | 0.739551 |
| 6527 | 10497337 | <a href="#">NM_009799</a>          | <a href="#">12346</a>     | carbonic anhydrase 1           | <a href="#">Car1</a>               | 1.035 | 0.151  | 0.883914 | 0.954252 |
| 6528 | 10474972 | <a href="#">NM_026929</a>          | <a href="#">69065</a>     | ChaC, cation transport regulat | <a href="#">Chac1</a>              | 1.035 | 0.635  | 0.54504  | 0.77708  |
| 6529 | 10596509 | <a href="#">NM_026645</a>          | <a href="#">68265</a>     | IQ motif containing F3         | <a href="#">Iqef3</a>              | 1.035 | 0.716  | 0.496483 | 0.741014 |
| 6530 | 10370497 | <a href="#">NM_172134</a>          | <a href="#">216134</a>    | pyridoxal (pyridoxine, vitamin | <a href="#">Pdxk</a>               | 1.035 | 0.855  | 0.420258 | 0.682515 |
| 6531 | 10401422 | <a href="#">NM_027438</a>          | <a href="#">70481</a>     | paraneoplastic antigen MA1     | <a href="#">Pnma1</a>              | 1.035 | 1.103  | 0.305453 | 0.581741 |

|      |          |                                    |                           |                                   |                                    |       |        |          |          |
|------|----------|------------------------------------|---------------------------|-----------------------------------|------------------------------------|-------|--------|----------|----------|
| 6532 | 10559357 | <a href="#">ENSMUST00000097928</a> | <a href="#">100038412</a> | predicted gene,<br>ENSMUSG0000007 | <a href="#">ENSMUSG00000073778</a> | 1.035 | 0.68   | 0.51768  | 0.756816 |
| 6533 | 10421128 | <a href="#">NM_021475</a>          | <a href="#">58860</a>     | ADAM-like, decysin 1              | <a href="#">Adamdec1</a>           | 1.035 | 0.462  | 0.657711 | 0.846971 |
| 6534 | 10555568 | <a href="#">BC092139</a>           | <a href="#">114641</a>    | ribosomal protein L31             | <a href="#">Rpl31</a>              | 1.035 | 0.141  | 0.891999 | 0.95769  |
| 6535 | 10425983 |                                    |                           |                                   |                                    | 1.035 | 1.512  | 0.173043 | 0.425494 |
| 6536 | 10434233 | <a href="#">NM_011672</a>          | <a href="#">22230</a>     | ubiquitin fusion degradation 1    | <a href="#">Ufd1l</a>              | 1.035 | 0.272  | 0.792926 | 0.915604 |
| 6537 | 10478289 |                                    |                           |                                   |                                    | 1.035 | 0.522  | 0.617373 | 0.823029 |
| 6538 | 10367041 | <a href="#">NM_153133</a>          | <a href="#">103142</a>    | retinol dehydrogenase 9           | <a href="#">Rdh9</a>               | 1.035 | 0.138  | 0.894392 | 0.958345 |
| 6539 | 10385325 | <a href="#">NM_013917</a>          | <a href="#">30939</a>     | pituitary tumor-transforming 1    | <a href="#">Pttg1</a>              | 1.035 | 0.436  | 0.675885 | 0.855911 |
| 6540 | 10554321 | <a href="#">ENSMUST00000098356</a> | <a href="#">100038478</a> | predicted gene,<br>ENSMUSG0000007 | <a href="#">ENSMUSG00000074057</a> | 1.035 | 0.994  | 0.352246 | 0.625281 |
| 6541 | 10364722 | <a href="#">NM_007909</a>          | <a href="#">13637</a>     | ephrin A2                         | <a href="#">Efna2</a>              | 1.035 | 0.058  | 0.955631 | 0.983063 |
| 6542 | 10560270 | <a href="#">NM_008718</a>          | <a href="#">18142</a>     | neuronal PAS domain protein 1     | <a href="#">Npas1</a>              | 1.035 | 0.564  | 0.589585 | 0.805725 |
| 6543 | 10576608 |                                    |                           |                                   |                                    | 1.035 | 0.8    | 0.44946  | 0.706889 |
| 6544 | 10465772 | <a href="#">NM_008577</a>          | <a href="#">17254</a>     | solute carrier family 3 (activ    | <a href="#">Slc3a2</a>             | 1.035 | -0.264 | 0.799077 | 0.918893 |
| 6545 | 10443221 | <a href="#">NM_001080769</a>       | <a href="#">224648</a>    | UHRF1 (ICBP90) binding<br>protein | <a href="#">Uhrf1bp1</a>           | 1.035 | 0.583  | 0.577371 | 0.797771 |
| 6546 | 10566934 | <a href="#">NM_053247</a>          | <a href="#">114332</a>    | lymphatic vessel endothelial h    | <a href="#">Lyve1</a>              | 1.035 | 0.652  | 0.534501 | 0.768432 |
| 6547 | 10424860 | <a href="#">ENSMUST00000096385</a> | <a href="#">223658</a>    | RIKEN cDNA D330001F17<br>gene     | <a href="#">D330001F17Rik</a>      | 1.035 | 0.649  | 0.536713 | 0.76984  |
| 6548 | 10350003 | <a href="#">NM_028057</a>          | <a href="#">72017</a>     | cytochrome b5 reductase 1         | <a href="#">Cyb5r1</a>             | 1.035 | 0.572  | 0.584488 | 0.802234 |
| 6549 | 10490950 | <a href="#">NM_021560</a>          | <a href="#">59058</a>     | basic helix-loop-helix domain     | <a href="#">Bhlhb5</a>             | 1.035 | 1.19   | 0.271839 | 0.546343 |
| 6550 | 10602062 | <a href="#">NM_021463</a>          | <a href="#">19139</a>     | phosphoribosyl pyrophosphate s    | <a href="#">Prps1</a>              | 1.035 | -0.221 | 0.831489 | 0.932333 |
| 6551 | 10494137 | <a href="#">NM_175356</a>          | <a href="#">107650</a>    | phosphatidylinositol 4-kinase,    | <a href="#">Pi4kb</a>              | 1.035 | 0.335  | 0.747084 | 0.892497 |
| 6552 | 10530283 |                                    |                           |                                   |                                    | 1.035 | 0.59   | 0.573343 | 0.796661 |
| 6553 | 10476928 | <a href="#">AB017157</a>           | <a href="#">13013</a>     | cystatin 9                        | <a href="#">Cst9</a>               | 1.035 | 0.267  | 0.796951 | 0.917479 |
| 6554 | 10419814 | <a href="#">NM_199470</a>          | <a href="#">239096</a>    | cadherin-like 24                  | <a href="#">Cdh24</a>              | 1.035 | 0.526  | 0.61454  | 0.821562 |
| 6555 | 10409053 | <a href="#">NM_026450</a>          | <a href="#">67911</a>     | zinc finger protein 169           | <a href="#">Zfp169</a>             | 1.035 | 0.484  | 0.64296  | 0.838239 |
| 6556 | 10419542 | <a href="#">NM_001033271</a>       | <a href="#">219024</a>    | transmembrane protein 55b         | <a href="#">Tmem55b</a>            | 1.035 | 0.27   | 0.794711 | 0.916664 |
| 6557 | 10354730 |                                    |                           |                                   |                                    | 1.035 | 0.693  | 0.510184 | 0.751325 |
| 6558 | 10585037 | <a href="#">NM_146000</a>          | <a href="#">215051</a>    | BUD13 homolog (yeast)             | <a href="#">Bud13</a>              | 1.035 | 0.287  | 0.782049 | 0.911385 |
| 6559 | 10361818 | <a href="#">NM_008703</a>          | <a href="#">18101</a>     | neuromedin B receptor             | <a href="#">Nmbr</a>               | 1.035 | 0.749  | 0.477322 | 0.728069 |
| 6560 | 10576493 |                                    |                           |                                   |                                    | 1.035 | 0.502  | 0.630376 | 0.831586 |
| 6561 | 10388304 |                                    |                           |                                   |                                    | 1.035 | 0.327  | 0.753269 | 0.896091 |
| 6562 | 10464240 | <a href="#">NM_028115</a>          | <a href="#">72133</a>     | TruB pseudouridine (psi) synth    | <a href="#">Trub1</a>              | 1.035 | 0.644  | 0.539632 | 0.772302 |
| 6563 | 10551021 | <a href="#">NM_023133</a>          | <a href="#">20085</a>     | ribosomal protein S19             | <a href="#">Rps19</a>              | 1.035 | 0.6    | 0.567059 | 0.792621 |
| 6564 | 10459637 |                                    |                           |                                   |                                    | 1.035 | 0.837  | 0.429195 | 0.690212 |
| 6565 | 10519211 | <a href="#">NM_031872</a>          | <a href="#">83771</a>     | taste receptor, type 1, member    | <a href="#">Tas1r3</a>             | 1.035 | 0.575  | 0.583015 | 0.801097 |
| 6566 | 10396008 | <a href="#">NM_177806</a>          | <a href="#">328110</a>    | PRP39 pre-mRNA processing<br>fact | <a href="#">Prpf39</a>             | 1.035 | 0.722  | 0.493243 | 0.739026 |
| 6567 | 10572591 | <a href="#">NM_029865</a>          | <a href="#">77090</a>     | occludin/ELL domain containing    | <a href="#">Ocell1</a>             | 1.035 | 0.941  | 0.376913 | 0.647069 |
| 6568 | 10496727 | <a href="#">NM_026993</a>          | <a href="#">69219</a>     | dimethylarginine dimethylamino    | <a href="#">Ddah1</a>              | 1.035 | 0.31   | 0.765337 | 0.902421 |
| 6569 | 10487433 | <a href="#">NM_028141</a>          | <a href="#">72180</a>     | zinc finger protein 661           | <a href="#">Zfp661</a>             | 1.035 | 0.313  | 0.763353 | 0.901493 |
| 6570 | 10368877 | <a href="#">NM_001034858</a>       | <a href="#">213402</a>    | armadillo repeat containing 2     | <a href="#">Armc2</a>              | 1.035 | 0.308  | 0.766566 | 0.902924 |
| 6571 | 10518492 | <a href="#">NM_001083342</a>       | <a href="#">242748</a>    | patched domain containing 2       | <a href="#">Ptchd2</a>             | 1.035 | 0.555  | 0.595417 | 0.809458 |
| 6572 | 10399823 |                                    |                           |                                   |                                    | 1.035 | 0.485  | 0.642048 | 0.837836 |
| 6573 | 10408952 | <a href="#">NM_175749</a>          | <a href="#">218210</a>    | nucleoporin 153                   | <a href="#">Nup153</a>             | 1.035 | 0.228  | 0.825701 | 0.929887 |
| 6574 | 10356628 | <a href="#">NM_207225</a>          | <a href="#">208727</a>    | histone deacetylase 4             | <a href="#">Hdac4</a>              | 1.035 | 0.392  | 0.706327 | 0.871814 |
| 6575 | 10545372 | <a href="#">NM_153778</a>          | <a href="#">71093</a>     | atonal homolog 8 (Drosophila)     | <a href="#">Atoh8</a>              | 1.035 | 0.71   | 0.499901 | 0.743052 |
| 6576 | 10449191 | <a href="#">NM_015830</a>          | <a href="#">50817</a>     | small optic lobes homolog (Dro    | <a href="#">Solh</a>               | 1.035 | 0.089  | 0.931453 | 0.972759 |
| 6577 | 10517614 | <a href="#">NM_001081672</a>       | <a href="#">625638</a>    | Likely orthologue of human fam    | <a href="#">RP23-25C1.8</a>        | 1.035 | 0.298  | 0.774425 | 0.907422 |
| 6578 | 10421934 | <a href="#">NM_053105</a>          | <a href="#">93688</a>     | kelch-like 1 (Drosophila)         | <a href="#">Klhl1</a>              | 1.035 | 0.359  | 0.729839 | 0.883264 |
| 6579 | 10524572 | <a href="#">NM_029992</a>          | <a href="#">77832</a>     | trichoplein, keratin filament     | <a href="#">Tchp</a>               | 1.034 | 0.581  | 0.578841 | 0.798528 |
| 6580 | 10445061 | <a href="#">NM_001099632</a>       | <a href="#">386454</a>    | ring finger protein 39            | <a href="#">Rnf39</a>              | 1.034 | 0.83   | 0.433395 | 0.693905 |
| 6581 | 10502904 | <a href="#">NM_031870</a>          | <a href="#">55993</a>     | mutS homolog 4 (E. coli)          | <a href="#">Msh4</a>               | 1.034 | 0.897  | 0.398808 | 0.665015 |
| 6582 | 10440050 | <a href="#">NM_026254</a>          | <a href="#">67581</a>     | TBC1 domain family, member<br>23  | <a href="#">Tbc1d23</a>            | 1.034 | 0.325  | 0.754501 | 0.896702 |
| 6583 | 10560605 | <a href="#">NM_001033410</a>       | <a href="#">230483</a>    | CEA-related cell adhesion mole    | <a href="#">Cacam16</a>            | 1.034 | 0.467  | 0.654424 | 0.845176 |

| 6583 | 1030072  | NM_001033712                       | 52463                  | CEA-related cell adhesion mole | Ceacam6                       | 1.034 | 0.407  | 0.357424 | 0.843170 |
|------|----------|------------------------------------|------------------------|--------------------------------|-------------------------------|-------|--------|----------|----------|
| 6584 | 10369688 | <a href="#">ENSMUST00000050826</a> | <a href="#">52463</a>  | tet oncogene 1                 | <a href="#">Tet1</a>          | 1.034 | -0.179 | 0.863196 | 0.945375 |
| 6585 | 10380384 | <a href="#">NM_027799</a>          | <a href="#">71452</a>  | ankyrin repeat domain 40       | <a href="#">Ankrd40</a>       | 1.034 | 0.966  | 0.365127 | 0.636272 |
| 6586 | 10464560 | <a href="#">NM_026316</a>          | <a href="#">67689</a>  | aldehyde dehydrogenase 3 famil | <a href="#">Aldh3b1</a>       | 1.034 | 0.87   | 0.412559 | 0.676183 |
| 6587 | 10352281 | <a href="#">NM_133225</a>          | <a href="#">170760</a> | acyl-Coenzyme A binding domain | <a href="#">Acbd3</a>         | 1.034 | 0.629  | 0.548694 | 0.779152 |
| 6588 | 10383545 | <a href="#">NM_001080932</a>       | <a href="#">68837</a>  | forkhead box K2                | <a href="#">Foxk2</a>         | 1.034 | 0.493  | 0.636543 | 0.834887 |
| 6589 | 10562251 | <a href="#">NM_011322</a>          | <a href="#">20266</a>  | sodium channel, voltage-gated, | <a href="#">Scn1b</a>         | 1.034 | 0.767  | 0.467527 | 0.720274 |
| 6590 | 10540639 | <a href="#">NM_010957</a>          | <a href="#">18294</a>  | 8-oxoguanine DNA-glycosylase 1 | <a href="#">Ogg1</a>          | 1.034 | 0.591  | 0.572499 | 0.796254 |
| 6591 | 10597833 | <a href="#">NM_178677</a>          | <a href="#">215474</a> | SEC22 vesicle trafficking prot | <a href="#">Sec22c</a>        | 1.034 | 0.092  | 0.92896  | 0.972036 |
| 6592 | 10479063 | <a href="#">NM_024436</a>          | <a href="#">19334</a>  | RAB22A, member RAS oncogene fa | <a href="#">Rab22a</a>        | 1.034 | 0.044  | 0.966358 | 0.986657 |
| 6593 | 10475514 | <a href="#">ENSMUST00000099458</a> | <a href="#">214616</a> | spermatogenesis associated 5-1 | <a href="#">Spata511</a>      | 1.034 | -0.234 | 0.821324 | 0.92863  |
| 6594 | 10569569 | <a href="#">NM_007803</a>          | <a href="#">13043</a>  | cortactin                      | <a href="#">Ctn</a>           | 1.034 | 0.471  | 0.651412 | 0.843859 |
| 6595 | 10396094 | <a href="#">NM_027117</a>          | <a href="#">69554</a>  | kelch domain containing 2      | <a href="#">Klhc2</a>         | 1.034 | 0.057  | 0.956265 | 0.983332 |
| 6596 | 10409508 | <a href="#">NM_134059</a>          | <a href="#">72935</a>  | DEAD (Asp-Glu-Ala-Asp) box pol | <a href="#">Ddx41</a>         | 1.034 | 0.24   | 0.817249 | 0.927212 |
| 6597 | 10510874 | <a href="#">ENSMUST00000071251</a> | <a href="#">230971</a> | multiple EGF-like-domains 6    | <a href="#">Megf6</a>         | 1.034 | 0.683  | 0.51618  | 0.755582 |
| 6598 | 10468059 | <a href="#">NM_013907</a>          | <a href="#">30838</a>  | F-box and WD-40 domain protein | <a href="#">Fbxw4</a>         | 1.034 | 0.712  | 0.499053 | 0.742429 |
| 6599 | 10557951 | <a href="#">NM_146205</a>          | <a href="#">233912</a> | armadillo repeat containing 5  | <a href="#">Armc5</a>         | 1.034 | 0.392  | 0.706459 | 0.871814 |
| 6600 | 10491182 | <a href="#">NM_177586</a>          | <a href="#">208691</a> | eukaryotic translation initiat | <a href="#">Eif5a2</a>        | 1.034 | 0.68   | 0.517793 | 0.756834 |
| 6601 | 10480775 | <a href="#">NM_001081199</a>       | <a href="#">381352</a> | MAM domain containing 4        | <a href="#">Mamdc4</a>        | 1.034 | 0.864  | 0.415412 | 0.678575 |
| 6602 | 10450025 | <a href="#">NM_145486</a>          | <a href="#">224703</a> | membrane-associated ring finge | <a href="#">March2</a>        | 1.034 | 0.322  | 0.756857 | 0.898026 |
| 6603 | 10481291 | <a href="#">NM_148928</a>          | <a href="#">70239</a>  | general transcription factor I | <a href="#">Gtf3c5</a>        | 1.034 | 0.12   | 0.907662 | 0.963723 |
| 6604 | 10383005 | <a href="#">NM_001085535</a>       | <a href="#">546519</a> | hypothetical LOC546519         | <a href="#">RP23-268N22.9</a> | 1.034 | 0.969  | 0.363921 | 0.635352 |
| 6605 | 10536976 | <a href="#">NM_010938</a>          | <a href="#">18181</a>  | nuclear respiratory factor 1   | <a href="#">Nrf1</a>          | 1.034 | 0.696  | 0.508347 | 0.750226 |
| 6606 | 10527920 | <a href="#">NM_020010</a>          | <a href="#">13121</a>  | cytochrome P450, family 51     | <a href="#">Cyp51</a>         | 1.034 | 0.283  | 0.785168 | 0.912507 |
| 6607 | 10426767 | <a href="#">NM_009701</a>          | <a href="#">11830</a>  | aquaporin 5                    | <a href="#">Aqp5</a>          | 1.034 | 0.458  | 0.660299 | 0.848652 |
| 6608 | 10458794 | <a href="#">BC119623</a>           | <a href="#">240261</a> | coiled-coil domain containing  | <a href="#">Ccdc112</a>       | 1.034 | -0.376 | 0.717599 | 0.876692 |
| 6609 | 10368695 | <a href="#">ENSMUST00000045526</a> | <a href="#">72045</a>  | RIKEN cDNA 2010001E11 gene     | <a href="#">2010001E11Rik</a> | 1.034 | 0.434  | 0.676653 | 0.856305 |
| 6610 | 10504611 | <a href="#">ENSMUST00000043958</a> | <a href="#">381522</a> | RIKEN cDNA E230008N13 gene     | <a href="#">E230008N13Rik</a> | 1.034 | -0.054 | 0.95838  | 0.984334 |
| 6611 | 10425723 | <a href="#">ENSMUST00000089154</a> | <a href="#">76505</a>  | RIKEN cDNA 1500009C09 gene     | <a href="#">1500009C09Rik</a> | 1.034 | 0.543  | 0.603544 | 0.814811 |
| 6612 | 10459158 | <a href="#">NM_178277</a>          | <a href="#">106894</a> | RIKEN cDNA A630042L21 gene     | <a href="#">A630042L21Rik</a> | 1.034 | 0.59   | 0.573034 | 0.796544 |
| 6613 | 10378319 | <a href="#">NM_033321</a>          | <a href="#">94045</a>  | purinergic receptor P2X, ligan | <a href="#">P2rx5</a>         | 1.034 | 0.31   | 0.765025 | 0.902309 |
| 6614 | 10361131 |                                    |                        |                                |                               | 1.034 | 0.313  | 0.763311 | 0.901493 |
| 6615 | 10481320 | <a href="#">NM_172977</a>          | <a href="#">269252</a> | general transcription factor I | <a href="#">Gtf3c4</a>        | 1.034 | 0.286  | 0.783284 | 0.911971 |
| 6616 | 10416189 | <a href="#">NM_010920</a>          | <a href="#">18092</a>  | NK2 transcription factor relat | <a href="#">Nkx2-6</a>        | 1.034 | 0.547  | 0.600848 | 0.812558 |
| 6617 | 10355162 | <a href="#">NM_001039493</a>       | <a href="#">241075</a> | pleckstrin homology domain con | <a href="#">Plekhm3</a>       | 1.034 | 0.853  | 0.421306 | 0.683765 |
| 6618 | 10534420 | <a href="#">NM_177574</a>          | <a href="#">194309</a> | vacuolar protein sorting 37D ( | <a href="#">Vps37d</a>        | 1.034 | 0.751  | 0.476311 | 0.727471 |
| 6619 | 10452648 | <a href="#">NM_145158</a>          | <a href="#">246707</a> | elastin microfibril interfacer | <a href="#">Emilin2</a>       | 1.034 | 0.604  | 0.564474 | 0.790721 |
| 6620 | 10434993 | <a href="#">NM_172822</a>          | <a href="#">239827</a> | phosphatidylinositol glycan an | <a href="#">Pigz</a>          | 1.034 | 0.588  | 0.574195 | 0.797076 |
| 6621 | 10389300 | <a href="#">BC022224</a>           | <a href="#">192970</a> | cDNA sequence BC022224         | <a href="#">BC022224</a>      | 1.034 | 0.648  | 0.536807 | 0.769874 |
| 6622 | 10526656 | <a href="#">NM_146164</a>          | <a href="#">231798</a> | leucine-rich repeats and calpo | <a href="#">Lrch4</a>         | 1.034 | 0.792  | 0.453701 | 0.710123 |
| 6623 | 10511414 |                                    |                        |                                |                               | 1.034 | 0.252  | 0.808246 | 0.922808 |
| 6624 | 10357220 | <a href="#">NM_175106</a>          | <a href="#">66343</a>  | transmembrane protein 177      | <a href="#">Tmem177</a>       | 1.034 | 0.313  | 0.762957 | 0.901446 |
| 6625 | 10471108 | <a href="#">NM_178760</a>          | <a href="#">277463</a> | G protein-coupled receptor 107 | <a href="#">Gpr107</a>        | 1.034 | 0.291  | 0.779485 | 0.910475 |
| 6626 | 10442801 | <a href="#">NM_012034</a>          | <a href="#">26945</a>  | tryptase gamma 1               | <a href="#">Tpsg1</a>         | 1.034 | 0.762  | 0.470517 | 0.722494 |
| 6627 | 10370950 | <a href="#">NM_007460</a>          | <a href="#">11776</a>  | adaptor-related protein comple | <a href="#">Ap3d1</a>         | 1.034 | 0.621  | 0.553645 | 0.78319  |
| 6628 | 10510125 | <a href="#">ENSMUST00000030328</a> | <a href="#">381572</a> | RIKEN cDNA 9430007A20 gene     | <a href="#">9430007A20Rik</a> | 1.034 | 0.186  | 0.857211 | 0.942404 |
| 6629 | 10403664 | <a href="#">NM_178640</a>          | <a href="#">97884</a>  | UDP-GalNAc:betaGlcNAc beta 1,3 | <a href="#">B3galnt2</a>      | 1.034 | 0.253  | 0.807    | 0.922086 |
| 6630 | 10562767 | <a href="#">ENSMUST00000008172</a> | <a href="#">69349</a>  | RIKEN cDNA 1700008O03 gene     | <a href="#">1700008O03Rik</a> | 1.034 | -0.151 | 0.883938 | 0.954252 |
| 6631 | 10526943 | <a href="#">NM_001038703</a>       | <a href="#">80290</a>  | G protein-coupled receptor 146 | <a href="#">Gpr146</a>        | 1.034 | 0.672  | 0.522626 | 0.759322 |

|      |          |                                    |                           |                                    |                                    |       |        |          |          |
|------|----------|------------------------------------|---------------------------|------------------------------------|------------------------------------|-------|--------|----------|----------|
| 6632 | 10461867 | <a href="#">AK015803</a>           | <a href="#">271564</a>    | vacuolar protein sorting 13A (     | <a href="#">Vps13a</a>             | 1.034 | -0.127 | 0.90277  | 0.962008 |
| 6633 | 10486616 | <a href="#">NM_009461</a>          | <a href="#">22222</a>     | ubiquitin protein ligase E3 co     | <a href="#">Ubr1</a>               | 1.034 | 0.611  | 0.559725 | 0.7871   |
| 6634 | 10399478 | <a href="#">NM_172950</a>          | <a href="#">14245</a>     | lipin 1                            | <a href="#">Lpin1</a>              | 1.034 | 0.692  | 0.510839 | 0.751986 |
| 6635 | 10572432 | <a href="#">NM_023627</a>          | <a href="#">71780</a>     | myo-inositol 1-phosphate synth     | <a href="#">Isyna1</a>             | 1.034 | -0.047 | 0.963427 | 0.985684 |
| 6636 | 10538187 | <a href="#">NM_053110</a>          | <a href="#">93695</a>     | glycoprotein (transmembrane) n     | <a href="#">Gpnmb</a>              | 1.034 | 0.941  | 0.377206 | 0.647268 |
| 6637 | 10344622 | <a href="#">ENSMUST00000097833</a> | <a href="#">100038431</a> | predicted gene,<br>ENSMUSG0000007  | <a href="#">ENSMUSG00000073742</a> | 1.033 | 0.416  | 0.689671 | 0.863782 |
| 6638 | 10426542 | <a href="#">ENSMUST00000100247</a> | <a href="#">100038643</a> | predicted gene,<br>ENSMUSG0000007  | <a href="#">ENSMUSG00000075433</a> | 1.033 | 0.763  | 0.469614 | 0.721727 |
| 6639 | 10481870 | <a href="#">NM_025709</a>          | <a href="#">66691</a>     | GTPase activating protein and      | <a href="#">Gapvd1</a>             | 1.033 | 0.328  | 0.751941 | 0.895376 |
| 6640 | 10353522 | <a href="#">ENSMUST00000097807</a> | <a href="#">623356</a>    | predicted gene, EG623356           | <a href="#">EG623356</a>           | 1.033 | 0.287  | 0.782456 | 0.911672 |
| 6641 | 10404597 | <a href="#">NM_024274</a>          | <a href="#">69955</a>     | phenylalanine-tRNA synthetase      | <a href="#">Fars2</a>              | 1.033 | -0.134 | 0.89703  | 0.95959  |
| 6642 | 10489305 | <a href="#">NM_021464</a>          | <a href="#">19281</a>     | protein tyrosine phosphatase,      | <a href="#">Ptrpt</a>              | 1.033 | 1.123  | 0.29751  | 0.573693 |
| 6643 | 10403244 |                                    |                           |                                    |                                    | 1.033 | 0.515  | 0.621932 | 0.826948 |
| 6644 | 10394978 | <a href="#">NM_009104</a>          | <a href="#">20135</a>     | ribonucleotide reductase M2        | <a href="#">Rrm2</a>               | 1.033 | 0.096  | 0.926364 | 0.970777 |
| 6645 | 10460237 | <a href="#">NM_019449</a>          | <a href="#">54445</a>     | unc-93 homolog B1 (C. elegans)     | <a href="#">Unc93b1</a>            | 1.033 | 0.923  | 0.385878 | 0.654817 |
| 6646 | 10483646 | <a href="#">ENSMUST00000102689</a> | <a href="#">20687</a>     | trans-acting transcription fac     | <a href="#">Sp3</a>                | 1.033 | 0.43   | 0.679542 | 0.857705 |
| 6647 | 10376839 | <a href="#">NM_028360</a>          | <a href="#">72795</a>     | tetratricopeptide repeat domai     | <a href="#">Ttc19</a>              | 1.033 | 0.232  | 0.822829 | 0.929127 |
| 6648 | 10580870 | <a href="#">ENSMUST00000098479</a> | <a href="#">79233</a>     | zinc finger protein 319            | <a href="#">Zfp319</a>             | 1.033 | 0.061  | 0.953051 | 0.981889 |
| 6649 | 10401737 | <a href="#">NM_001033475</a>       | <a href="#">382620</a>    | transmembrane emp24 domain<br>con  | <a href="#">Tmed8</a>              | 1.033 | 0.491  | 0.638338 | 0.835923 |
| 6650 | 10377148 | <a href="#">NM_177369</a>          | <a href="#">17885</a>     | myosin, heavy polypeptide 8, s     | <a href="#">Myh8</a>               | 1.033 | 0.498  | 0.633232 | 0.833255 |
| 6651 | 10523529 | <a href="#">NM_012001</a>          | <a href="#">26891</a>     | COP9 (constitutive photomorpha     | <a href="#">Cops4</a>              | 1.033 | -0.567 | 0.588054 | 0.804881 |
| 6652 | 10525495 | <a href="#">BC038367</a>           | <a href="#">208043</a>    | SET domain containing 1B           | <a href="#">Setd1b</a>             | 1.033 | 0.432  | 0.67865  | 0.857345 |
| 6653 | 10465411 | <a href="#">NM_009203</a>          | <a href="#">20521</a>     | solute carrier family 22 (orga     | <a href="#">Slc22a12</a>           | 1.033 | 0.535  | 0.60844  | 0.817698 |
| 6654 | 10560070 | <a href="#">NM_145578</a>          | <a href="#">22192</a>     | ubiquitin-conjugating enzyme E     | <a href="#">Ube2m</a>              | 1.033 | -0.108 | 0.916944 | 0.967219 |
| 6655 | 10484547 | <a href="#">NM_001011758</a>       | <a href="#">257915</a>    | olfactory receptor 1016            | <a href="#">Olfir1016</a>          | 1.033 | 0.503  | 0.629834 | 0.831325 |
| 6656 | 10382438 | <a href="#">NM_170758</a>          | <a href="#">217303</a>    | CD300A antigen                     | <a href="#">Cd300a</a>             | 1.033 | 0.786  | 0.457079 | 0.712878 |
| 6657 | 10462005 | <a href="#">NM_031997</a>          | <a href="#">83921</a>     | transmembrane protein 2            | <a href="#">Tmem2</a>              | 1.033 | 0.194  | 0.851775 | 0.940193 |
| 6658 | 10418002 | <a href="#">XM_907340</a>          | <a href="#">620119</a>    | predicted gene, EG620119           | <a href="#">EG620119</a>           | 1.033 | 0.221  | 0.831346 | 0.932333 |
| 6659 | 10566182 | <a href="#">NM_001011536</a>       | <a href="#">258168</a>    | olfactory receptor 566             | <a href="#">Olfir566</a>           | 1.033 | 0.053  | 0.959546 | 0.984837 |
| 6660 | 10464974 | <a href="#">NM_030109</a>          | <a href="#">319322</a>    | splicing factor 3b, subunit 2      | <a href="#">Sf3b2</a>              | 1.033 | 0.149  | 0.885801 | 0.955239 |
| 6661 | 10449672 | <a href="#">NM_080727</a>          | <a href="#">140765</a>    | transmembrane protease, serine     | <a href="#">Tmprss3</a>            | 1.033 | 0.633  | 0.546444 | 0.777695 |
| 6662 | 10557806 |                                    |                           |                                    |                                    | 1.033 | 0.939  | 0.378006 | 0.647713 |
| 6663 | 10435841 | <a href="#">NM_144550</a>          | <a href="#">212514</a>    | coiled-coil domain containing      | <a href="#">Ccdc52</a>             | 1.033 | 0.286  | 0.782708 | 0.911672 |
| 6664 | 10348999 | <a href="#">NM_011800</a>          | <a href="#">23836</a>     | cadherin 20                        | <a href="#">Cdh20</a>              | 1.033 | 1.011  | 0.344913 | 0.61898  |
| 6665 | 10397281 | <a href="#">NM_178363</a>          | <a href="#">56531</a>     | YLP motif containing 1             | <a href="#">Ylpm1</a>              | 1.033 | 0.534  | 0.609195 | 0.818089 |
| 6666 | 10512594 | <a href="#">NM_001099314</a>       | <a href="#">100039672</a> | hypothetical protein LOC100039     | <a href="#">RP23-191F22.4</a>      | 1.033 | 0.811  | 0.443559 | 0.702308 |
| 6667 | 10557644 | <a href="#">BC027193</a>           | <a href="#">14123</a>     | fibrosin                           | <a href="#">Fbrs</a>               | 1.033 | 0.16   | 0.87691  | 0.951412 |
| 6668 | 10479249 | <a href="#">NM_198656</a>          | <a href="#">381409</a>    | cadherin-like 26                   | <a href="#">Cdh26</a>              | 1.033 | 1.01   | 0.34532  | 0.61945  |
| 6669 | 10461452 | <a href="#">ENSMUST00000081739</a> | <a href="#">100038753</a> | predicted gene,<br>ENSMUSG0000006  | <a href="#">ENSMUSG00000064032</a> | 1.033 | 0.575  | 0.582702 | 0.800924 |
| 6670 | 10486154 | <a href="#">NM_001001982</a>       | <a href="#">214239</a>    | RIKEN cDNA A430105I19 gene         | <a href="#">A430105I19Rik</a>      | 1.033 | 0.747  | 0.478939 | 0.729132 |
| 6671 | 10488806 | <a href="#">NM_026030</a>          | <a href="#">67204</a>     | eukaryotic translation initiat     | <a href="#">Eif2s2</a>             | 1.033 | 0.588  | 0.574296 | 0.797076 |
| 6672 | 10532040 | <a href="#">NM_026856</a>          | <a href="#">52397</a>     | zinc finger protein 644            | <a href="#">Zfp644</a>             | 1.033 | 0.529  | 0.61269  | 0.820438 |
| 6673 | 10521090 | <a href="#">NM_001040435</a>       | <a href="#">21335</a>     | transforming, acidic coiled-co     | <a href="#">Tacc3</a>              | 1.033 | 0.579  | 0.579964 | 0.799189 |
| 6674 | 10519151 | <a href="#">NM_145124</a>          | <a href="#">76580</a>     | mindbomb homolog 2<br>(Drosophila) | <a href="#">Mib2</a>               | 1.033 | 0.681  | 0.51737  | 0.756572 |
| 6675 | 10593219 | <a href="#">NM_010924</a>          | <a href="#">18113</a>     | nicotinamide N-methyltransfera     | <a href="#">Nnmt</a>               | 1.033 | 0.362  | 0.727865 | 0.881998 |
| 6676 | 10451123 | <a href="#">NM_022880</a>          | <a href="#">63959</a>     | solute carrier family 29 (nucl     | <a href="#">Slc29a1</a>            | 1.033 | 0.505  | 0.628537 | 0.830964 |
| 6677 | 10513583 | <a href="#">NM_139291</a>          | <a href="#">66440</a>     | cell division cycle 26             | <a href="#">Cdc26</a>              | 1.033 | -0.256 | 0.805459 | 0.921471 |
| 6678 | 10389786 | <a href="#">NM_172563</a>          | <a href="#">217082</a>    | hepatic leukemia factor            | <a href="#">Hlf</a>                | 1.033 | 0.579  | 0.579914 | 0.799181 |
| 6679 | 10425354 | <a href="#">NM_010795</a>          | <a href="#">17309</a>     | mannoside acetylglucosaminyltr     | <a href="#">Mgat3</a>              | 1.033 | 0.487  | 0.640635 | 0.837232 |
| 6680 | 10502655 | <a href="#">NM_010516</a>          | <a href="#">16007</a>     | cysteine rich protein 61           | <a href="#">Cyr61</a>              | 1.033 | 0.75   | 0.477155 | 0.727867 |
| 6681 | 10558612 | <a href="#">NM_146518</a>          | <a href="#">258511</a>    | olfactory receptor 523             | <a href="#">Olfir523</a>           | 1.033 | 0.835  | 0.430334 | 0.691097 |
| 6682 | 10519007 | <a href="#">NM_026388</a>          | <a href="#">67808</a>     | transformation related protein     | <a href="#">Tprgl</a>              | 1.033 | -0.118 | 0.909306 | 0.963879 |
| 6683 | 10550501 | <a href="#">NM_153761</a>          | <a href="#">243864</a>    | MHC I like leukocyte 2             | <a href="#">Mill2</a>              | 1.033 | 0.831  | 0.432831 | 0.693264 |
| 6684 | 10443344 |                                    |                           |                                    |                                    | 1.033 | 0.973  | 0.361874 | 0.633538 |

|      |          |                                    |                           |                                 |                                    |       |        |          |          |
|------|----------|------------------------------------|---------------------------|---------------------------------|------------------------------------|-------|--------|----------|----------|
| 6685 | 10494873 | <a href="#">NM_001033303</a>       | <a href="#">229665</a>    | adenosine monophosphate deamin  | <a href="#">Ampd1</a>              | 1.033 | 0.714  | 0.497636 | 0.741949 |
| 6686 | 10540141 | <a href="#">NM_172730</a>          | <a href="#">232236</a>    | RIKEN cDNA C130022K22 gene      | <a href="#">C130022K22Rik</a>      | 1.033 | -0.109 | 0.915937 | 0.966745 |
| 6687 | 10595840 | <a href="#">NM_153420</a>          | <a href="#">235534</a>    | acid phosphatase-like 2         | <a href="#">Acp12</a>              | 1.033 | 0.479  | 0.646225 | 0.840435 |
| 6688 | 10378802 | <a href="#">NM_478643</a>          | <a href="#">104484</a>    | bleomycin hydrolase             | <a href="#">Blmh</a>               | 1.033 | 0.092  | 0.92955  | 0.972307 |
| 6689 | 10606102 | <a href="#">NM_068832</a>          | <a href="#">18679</a>     | phosphorylase kinase alpha 1    | <a href="#">Pfkfb1</a>             | 1.033 | 0.277  | 0.789502 | 0.914397 |
| 6690 | 10470665 | <a href="#">NM_198033</a>          | <a href="#">269254</a>    | senataxin                       | <a href="#">Setx</a>               | 1.033 | -0.066 | 0.94919  | 0.980395 |
| 6691 | 10421624 | <a href="#">NM_177381</a>          | <a href="#">338337</a>    | component of oligomeric golgi   | <a href="#">Cog3</a>               | 1.033 | 0.451  | 0.665147 | 0.850823 |
| 6692 | 10396030 | <a href="#">NM_178912</a>          | <a href="#">104806</a>    | Fanconi anemia, complementatio  | <a href="#">Fancm</a>              | 1.033 | 0.532  | 0.610607 | 0.818945 |
| 6693 | 10452307 | <a href="#">NM_019418</a>          | <a href="#">50930</a>     | tumor necrosis factor (ligand)  | <a href="#">Tnfsf14</a>            | 1.033 | 0.69   | 0.512053 | 0.75265  |
| 6694 | 10395259 | <a href="#">NM_021524</a>          | <a href="#">59027</a>     | nicotinamide phosphoribosyltra  | <a href="#">Nampt</a>              | 1.033 | -0.242 | 0.81568  | 0.926149 |
| 6695 | 10484865 |                                    |                           |                                 |                                    | 1.033 | 0.456  | 0.66167  | 0.84929  |
| 6696 | 10475843 | <a href="#">ENSMUST00000099399</a> | <a href="#">100038529</a> | predicted gene, ENSMUSG0000007  | <a href="#">ENSMUSG00000074816</a> | 1.033 | 0.596  | 0.569712 | 0.794081 |
| 6697 | 10494592 | <a href="#">NM_001033779</a>       | <a href="#">433632</a>    | predicted gene, EG433632        | <a href="#">EG433632</a>           | 1.033 | 1.037  | 0.333188 | 0.609187 |
| 6698 | 10532582 | <a href="#">XM_912851</a>          | <a href="#">74376</a>     | myosin XVIIIb                   | <a href="#">Myo18b</a>             | 1.033 | 0.568  | 0.587059 | 0.804041 |
| 6699 | 10589413 | <a href="#">NM_018757</a>          | <a href="#">54369</a>     | non-metastatic cells 6, protei  | <a href="#">Nme6</a>               | 1.033 | 0.193  | 0.85235  | 0.940463 |
| 6700 | 10521755 | <a href="#">AK015432</a>           | <a href="#">73955</a>     | RIKEN cDNA 4930449I04 gene      | <a href="#">4930449I04Rik</a>      | 1.032 | 0.197  | 0.849387 | 0.939132 |
| 6701 | 10421258 | <a href="#">NM_145978</a>          | <a href="#">213019</a>    | PDZ and LIM domain 2            | <a href="#">Pdlim2</a>             | 1.032 | 1.256  | 0.24815  | 0.521506 |
| 6702 | 10494536 | <a href="#">NM_021517</a>          | <a href="#">59020</a>     | PDZ domain containing 1         | <a href="#">Pdzk1</a>              | 1.032 | 0.443  | 0.671068 | 0.853953 |
| 6703 | 10375127 | <a href="#">AK006938</a>           | <a href="#">73493</a>     | RIKEN cDNA 1700072H12 gene      | <a href="#">1700072H12Rik</a>      | 1.032 | 0.753  | 0.47534  | 0.726829 |
| 6704 | 10485429 | <a href="#">NM_175094</a>          | <a href="#">27402</a>     | pyruvate dehydrogenase complex  | <a href="#">Pdhx</a>               | 1.032 | 0.06   | 0.953499 | 0.982042 |
| 6705 | 10440911 |                                    |                           |                                 |                                    | 1.032 | -0.122 | 0.906005 | 0.963405 |
| 6706 | 10462791 | <a href="#">NM_027314</a>          | <a href="#">69104</a>     | membrane-associated ring finge  | <a href="#">March5</a>             | 1.032 | -0.066 | 0.949322 | 0.980484 |
| 6707 | 10424622 |                                    |                           |                                 |                                    | 1.032 | 0.971  | 0.363067 | 0.634368 |
| 6708 | 10398052 | <a href="#">NM_001034870</a>       | <a href="#">546546</a>    | serine (or cysteine) peptidase  | <a href="#">Serpina3h</a>          | 1.032 | 1.051  | 0.327122 | 0.603338 |
| 6709 | 10441642 | <a href="#">NM_018819</a>          | <a href="#">55951</a>     | brain protein 44-like           | <a href="#">Brp44l</a>             | 1.032 | 0.553  | 0.59679  | 0.810126 |
| 6710 | 10510923 | <a href="#">NM_013783</a>          | <a href="#">27390</a>     | membrane metallo-endopeptidase  | <a href="#">Mme11</a>              | 1.032 | 0.426  | 0.682729 | 0.859827 |
| 6711 | 10437023 | <a href="#">NM_001045529</a>       | <a href="#">338467</a>    | microrchidia 3                  | <a href="#">More3</a>              | 1.032 | 0.232  | 0.822868 | 0.929127 |
| 6712 | 10469987 | <a href="#">NM_001029983</a>       | <a href="#">227619</a>    | mannosidase, alpha, class 1B,   | <a href="#">Man1b1</a>             | 1.032 | 0.386  | 0.710604 | 0.873091 |
| 6713 | 10510886 | <a href="#">BC031402</a>           | <a href="#">230971</a>    | multiple EGF-like-domains 6     | <a href="#">Mefg6</a>              | 1.032 | 0.718  | 0.495139 | 0.740032 |
| 6714 | 10399751 | <a href="#">NM_027866</a>          | <a href="#">71693</a>     | collectin sub-family member 11  | <a href="#">Colec11</a>            | 1.032 | 0.729  | 0.489024 | 0.736349 |
| 6715 | 10368027 |                                    |                           |                                 |                                    | 1.032 | 0.913  | 0.390774 | 0.659209 |
| 6716 | 10559243 | <a href="#">ENSMUST00000097935</a> | <a href="#">624121</a>    | predicted gene, EG624121        | <a href="#">EG624121</a>           | 1.032 | 0.187  | 0.85712  | 0.942404 |
| 6717 | 10442834 | <a href="#">NM_028009</a>          | <a href="#">106707</a>    | RNA pseudouridylyate synthase d | <a href="#">Rpusd1</a>             | 1.032 | 0.189  | 0.855441 | 0.941478 |
| 6718 | 10460631 | <a href="#">NM_009045</a>          | <a href="#">19697</a>     | v-rel reticuloendotheliosis vi  | <a href="#">Rela</a>               | 1.032 | 0.036  | 0.972459 | 0.988158 |
| 6719 | 10580415 |                                    |                           |                                 |                                    | 1.032 | 0.607  | 0.56271  | 0.789779 |
| 6720 | 10485645 | <a href="#">NM_009037</a>          | <a href="#">19672</a>     | reticulocalbin 1                | <a href="#">Rcn1</a>               | 1.032 | 0.232  | 0.822727 | 0.929111 |
| 6721 | 10377822 | <a href="#">NM_025397</a>          | <a href="#">66172</a>     | mediator of RNA polymerase II   | <a href="#">Med11</a>              | 1.032 | 0.077  | 0.940679 | 0.977    |
| 6722 | 10503431 | <a href="#">NM_013752</a>          | <a href="#">27354</a>     | nibrin                          | <a href="#">Nbn</a>                | 1.032 | -0.038 | 0.971088 | 0.988148 |
| 6723 | 10541206 | <a href="#">NM_016718</a>          | <a href="#">29862</a>     | ninjurin 2                      | <a href="#">Ninj2</a>              | 1.032 | 1.239  | 0.253989 | 0.528265 |
| 6724 | 10550274 | <a href="#">NM_008627</a>          | <a href="#">17537</a>     | Meis homeobox 3                 | <a href="#">Meis3</a>              | 1.032 | 0.156  | 0.880589 | 0.952631 |
| 6725 | 10537728 | <a href="#">NM_007610</a>          | <a href="#">12366</a>     | caspase 2                       | <a href="#">Casp2</a>              | 1.032 | 0.641  | 0.54108  | 0.773484 |
| 6726 | 10555297 | <a href="#">NM_020574</a>          | <a href="#">57442</a>     | potassium voltage-gated channe  | <a href="#">Kcne3</a>              | 1.032 | 0.212  | 0.837898 | 0.934421 |
| 6727 | 10550574 | <a href="#">NM_032418</a>          | <a href="#">13400</a>     | dystrophia myotonica-protein k  | <a href="#">Dmpk</a>               | 1.032 | 0.631  | 0.547538 | 0.778461 |
| 6728 | 10469867 | <a href="#">NM_146251</a>          | <a href="#">241274</a>    | patatin-like phospholipase dom  | <a href="#">Pnpla7</a>             | 1.032 | 0.962  | 0.366983 | 0.638    |
| 6729 | 10567303 | <a href="#">NM_009940</a>          | <a href="#">12850</a>     | demethyl-Q 7                    | <a href="#">Coq7</a>               | 1.032 | 0.174  | 0.867014 | 0.946934 |
| 6730 | 10361200 | <a href="#">NM_145415</a>          | <a href="#">215193</a>    | expressed sequence AA408296     | <a href="#">AA408296</a>           | 1.032 | 0.289  | 0.780977 | 0.91101  |
| 6731 | 10572466 | <a href="#">NM_201607</a>          | <a href="#">110385</a>    | phosphodiesterase 4C, cAMP spe  | <a href="#">Pde4c</a>              | 1.032 | 0.837  | 0.42927  | 0.69028  |
| 6732 | 10568225 | <a href="#">NM_146202</a>          | <a href="#">233890</a>    | zinc finger protein 768         | <a href="#">Zfp768</a>             | 1.032 | 0.509  | 0.626128 | 0.82971  |
| 6733 | 10421911 | <a href="#">NM_178685</a>          | <a href="#">219257</a>    | protocadherin 20                | <a href="#">Pcdh20</a>             | 1.032 | 0.467  | 0.654468 | 0.845176 |
| 6734 | 10493824 | <a href="#">NM_199422</a>          | <a href="#">381493</a>    | S100 calcium binding protein A  | <a href="#">S100a7a</a>            | 1.032 | 1.02   | 0.34061  | 0.615753 |
| 6735 | 10580061 | <a href="#">NM_016671</a>          | <a href="#">50931</a>     | interleukin 27 receptor, alpha  | <a href="#">Il27ra</a>             | 1.032 | 0.471  | 0.651827 | 0.844083 |

|      |          |                                    |                           |                                |                                    |       |        |          |          |
|------|----------|------------------------------------|---------------------------|--------------------------------|------------------------------------|-------|--------|----------|----------|
| 6736 | 10561958 | <a href="#">NM_178252</a>          | <a href="#">233071</a>    | sorting nexin 26               | <a href="#">Snx26</a>              | 1.032 | 0.796  | 0.451398 | 0.708512 |
| 6737 | 10504218 | <a href="#">NM_019874</a>          | <a href="#">56323</a>     | DnaJ (Hsp40) homolog, subfamil | <a href="#">Dnajb5</a>             | 1.032 | 0.416  | 0.689621 | 0.863782 |
| 6738 | 10579313 | <a href="#">NM_133772</a>          | <a href="#">76900</a>     | single stranded DNA binding pr | <a href="#">Ssbp4</a>              | 1.032 | 0.37   | 0.722256 | 0.879223 |
| 6739 | 10579277 | <a href="#">NM_178771</a>          | <a href="#">234378</a>    | kelch-like 26 (Drosophila)     | <a href="#">Klhl26</a>             | 1.032 | 0.329  | 0.751757 | 0.895263 |
| 6740 | 10571907 | <a href="#">NM_027756</a>          | <a href="#">71306</a>     | microfibrillar-associated prot | <a href="#">Mfap3l</a>             | 1.032 | 0.285  | 0.783904 | 0.912068 |
| 6741 | 10402841 | <a href="#">NM_028193</a>          | <a href="#">72308</a>     | BRF1 homolog, subunit of RNA p | <a href="#">Brl1</a>               | 1.032 | 0.664  | 0.527299 | 0.762963 |
| 6742 | 10467921 | <a href="#">NM_007700</a>          | <a href="#">12675</a>     | conserved helix-loop-helix ubi | <a href="#">Chuk</a>               | 1.032 | 0.212  | 0.838238 | 0.934421 |
| 6743 | 10503617 | <a href="#">NM_199467</a>          | <a href="#">212377</a>    | RIKEN cDNA F730047E07 gene     | <a href="#">F730047E07Rik</a>      | 1.032 | 0.388  | 0.709531 | 0.872938 |
| 6744 | 10409557 | <a href="#">NM_012015</a>          | <a href="#">26914</a>     | H2A histone family, member Y   | <a href="#">H2afy</a>              | 1.032 | 0.599  | 0.567529 | 0.792875 |
| 6745 | 10474355 | <a href="#">ENSMUST00000037284</a> | <a href="#">329482</a>    | doublecortin domain containing | <a href="#">Dcdc5</a>              | 1.032 | 1.017  | 0.341852 | 0.616313 |
| 6746 | 10442840 | <a href="#">BC052484</a>           | <a href="#">328783</a>    | cDNA sequence BC052484         | <a href="#">BC052484</a>           | 1.032 | 0.493  | 0.636519 | 0.834887 |
| 6747 | 10558596 | <a href="#">NM_153783</a>          | <a href="#">212503</a>    | polyamine oxidase (exo-N4-amin | <a href="#">Paox</a>               | 1.032 | 0.311  | 0.764543 | 0.901841 |
| 6748 | 10555836 |                                    |                           |                                |                                    | 1.032 | 0.335  | 0.747206 | 0.892524 |
| 6749 | 10502105 | <a href="#">NM_010113</a>          | <a href="#">13645</a>     | epidermal growth factor        | <a href="#">Egf</a>                | 1.032 | 0.422  | 0.685484 | 0.861073 |
| 6750 | 10528172 |                                    |                           |                                |                                    | 1.032 | 0.538  | 0.606587 | 0.816766 |
| 6751 | 10513362 | <a href="#">ENSMUST00000107544</a> | <a href="#">634731</a>    | similar to sushi domain contai | <a href="#">LOC634731</a>          | 1.032 | 0.212  | 0.838254 | 0.934421 |
| 6752 | 10607356 | <a href="#">NM_027543</a>          | <a href="#">70771</a>     | G-protein coupled receptor 173 | <a href="#">Gpr173</a>             | 1.031 | 0.253  | 0.80738  | 0.922371 |
| 6753 | 10428825 |                                    |                           |                                |                                    | 1.031 | 0.531  | 0.611697 | 0.819835 |
| 6754 | 10604148 | <a href="#">NM_001004193</a>       | <a href="#">434768</a>    | reproductive homeobox 8        | <a href="#">Rhox8</a>              | 1.031 | 0.726  | 0.490542 | 0.737328 |
| 6755 | 10366038 | <a href="#">NM_015737</a>          | <a href="#">14426</a>     | UDP-N-acetyl-alpha-D-galactosa | <a href="#">Galnt4</a>             | 1.031 | 0.099  | 0.924011 | 0.969768 |
| 6756 | 10572962 | <a href="#">NM_001081240</a>       | <a href="#">102182</a>    | expressed sequence AI931714    | <a href="#">AI931714</a>           | 1.031 | 0.221  | 0.83107  | 0.932182 |
| 6757 | 10532187 | <a href="#">NM_153569</a>          | <a href="#">231580</a>    | cyclin G associated kinase     | <a href="#">Gak</a>                | 1.031 | 0.096  | 0.926266 | 0.970777 |
| 6758 | 10576749 | <a href="#">NM_008790</a>          | <a href="#">18545</a>     | Purkinje cell protein 2 (L7)   | <a href="#">Pcp2</a>               | 1.031 | 0.569  | 0.586625 | 0.803706 |
| 6759 | 10433199 | <a href="#">NM_148924</a>          | <a href="#">74120</a>     | zinc finger protein 263        | <a href="#">Zfp263</a>             | 1.031 | 0.151  | 0.884421 | 0.95453  |
| 6760 | 10583898 | <a href="#">ENSMUST00000098926</a> | <a href="#">100038418</a> | predicted gene, ENSMUSG0000007 | <a href="#">ENSMUSG00000074465</a> | 1.031 | 1.1    | 0.306527 | 0.582999 |
| 6761 | 10382956 | <a href="#">NM_181856</a>          | <a href="#">217356</a>    | transmembrane channel-like 8   | <a href="#">Tmc8</a>               | 1.031 | 0.646  | 0.538054 | 0.771077 |
| 6762 | 10454873 | <a href="#">BC100467</a>           | <a href="#">74966</a>     | RIKEN cDNA 4930471G03 gene     | <a href="#">4930471G03Rik</a>      | 1.031 | 1.073  | 0.317662 | 0.594815 |
| 6763 | 10391625 | <a href="#">NM_011551</a>          | <a href="#">21429</a>     | upstream binding transcription | <a href="#">Ubtf</a>               | 1.031 | -0.037 | 0.971514 | 0.988148 |
| 6764 | 10529887 |                                    |                           |                                |                                    | 1.031 | 0.165  | 0.873344 | 0.949372 |
| 6765 | 10538150 | <a href="#">NM_025326</a>          | <a href="#">66058</a>     | transmembrane protein 176A     | <a href="#">Tmem176a</a>           | 1.031 | 0.51   | 0.624992 | 0.829015 |
| 6766 | 10481508 | <a href="#">NM_133346</a>          | <a href="#">72323</a>     | ankyrin repeat and SOCS box-co | <a href="#">Asb6</a>               | 1.031 | 0.438  | 0.674281 | 0.855309 |
| 6767 | 10538310 | <a href="#">NM_007966</a>          | <a href="#">14028</a>     | even skipped homeotic gene 1 h | <a href="#">Evx1</a>               | 1.031 | 0.537  | 0.607552 | 0.817336 |
| 6768 | 10455007 | <a href="#">NM_025594</a>          | <a href="#">66492</a>     | zinc finger, matrin type 2     | <a href="#">Zmat2</a>              | 1.031 | 0.341  | 0.74295  | 0.89053  |
| 6769 | 10504905 | <a href="#">NM_178756</a>          | <a href="#">272031</a>    | RIKEN cDNA E130309F12 gene     | <a href="#">E130309F12Rik</a>      | 1.031 | 0.869  | 0.412672 | 0.676213 |
| 6770 | 10517173 | <a href="#">NM_144527</a>          | <a href="#">70012</a>     | coiled-coil domain containing  | <a href="#">Ccdc21</a>             | 1.031 | 0.419  | 0.687239 | 0.862117 |
| 6771 | 10529801 | <a href="#">NM_178729</a>          | <a href="#">242960</a>    | F-box and leucine-rich repeat  | <a href="#">Fbx15</a>              | 1.031 | 0.32   | 0.758182 | 0.898649 |
| 6772 | 10587778 |                                    |                           |                                |                                    | 1.031 | 0.04   | 0.969277 | 0.987586 |
| 6773 | 10590137 | <a href="#">NM_130864</a>          | <a href="#">113868</a>    | acetyl-Coenzyme A acyltransfer | <a href="#">Acaa1a</a>             | 1.031 | 0.158  | 0.878607 | 0.951851 |
| 6774 | 10446537 | <a href="#">NM_177278</a>          | <a href="#">320858</a>    | l(3)mbt-like 4 (Drosophila)    | <a href="#">L3mbtl4</a>            | 1.031 | 0.505  | 0.628523 | 0.830964 |
| 6775 | 10516225 | <a href="#">AK015982</a>           | <a href="#">75220</a>     | RIKEN cDNA 4930535I16 gene     | <a href="#">4930535I16Rik</a>      | 1.031 | 0.549  | 0.599787 | 0.812076 |
| 6776 | 10504955 | <a href="#">XR_031565</a>          | <a href="#">100045339</a> | similar to ribosomal protein L | <a href="#">LOC100045339</a>       | 1.031 | -0.302 | 0.771437 | 0.905701 |
| 6777 | 10500183 | <a href="#">NM_144899</a>          | <a href="#">229595</a>    | ADAMTS-like 4                  | <a href="#">Adamts14</a>           | 1.031 | 1.068  | 0.319922 | 0.59668  |
| 6778 | 10497390 | <a href="#">NM_028840</a>          | <a href="#">74252</a>     | armadillo repeat containing 1  | <a href="#">Armc1</a>              | 1.031 | -0.143 | 0.890125 | 0.956731 |
| 6779 | 10496715 | <a href="#">NM_001081094</a>       | <a href="#">229937</a>    | RIKEN cDNA 2410019A14 gene     | <a href="#">2410019A14Rik</a>      | 1.031 | -0.053 | 0.95903  | 0.98454  |
| 6780 | 10511017 | <a href="#">NM_177674</a>          | <a href="#">544678</a>    | RIKEN cDNA 2010015L04 gene     | <a href="#">2010015L04Rik</a>      | 1.031 | 0.455  | 0.662504 | 0.849733 |
| 6781 | 10434934 | <a href="#">NM_175177</a>          | <a href="#">71911</a>     | 3-hydroxybutyrate dehydrogenas | <a href="#">Bdh1</a>               | 1.031 | 0.67   | 0.523625 | 0.76025  |
| 6782 | 10397736 | <a href="#">NM_146037</a>          | <a href="#">217826</a>    | potassium channel, subfamily K | <a href="#">Kenk13</a>             | 1.031 | 0.966  | 0.365258 | 0.636343 |
| 6783 | 10574384 | <a href="#">NM_145602</a>          | <a href="#">234593</a>    | N-myc downstream regulated gen | <a href="#">Ndrq4</a>              | 1.031 | 0.371  | 0.720998 | 0.878601 |
| 6784 | 10375774 | <a href="#">BC041684</a>           | <a href="#">108072</a>    | glutamate receptor, metabotrop | <a href="#">Grm6</a>               | 1.031 | 0.504  | 0.629292 | 0.831256 |
| 6785 | 10578262 |                                    |                           |                                |                                    | 1.031 | 0.367  | 0.724423 | 0.880611 |

|      |          |                                     |                        |                                |                               |       |        |          |          |
|------|----------|-------------------------------------|------------------------|--------------------------------|-------------------------------|-------|--------|----------|----------|
| 6786 | 10512739 | <a href="#">NM_011728</a>           | <a href="#">22590</a>  | xeroderma pigmentosum, complem | <a href="#">Xpa</a>           | 1.031 | -0.227 | 0.826729 | 0.930499 |
| 6787 | 10516348 | <a href="#">NM_153402</a>           | <a href="#">214150</a> | eukaryotic translation initiat | <a href="#">Eif2c3</a>        | 1.031 | 0.348  | 0.737905 | 0.88827  |
| 6788 | 10348643 | <a href="#">NM_206896</a>           | <a href="#">257890</a> | olfactory receptor 12          | <a href="#">Olf12</a>         | 1.031 | 1.076  | 0.316704 | 0.593914 |
| 6789 | 10450034 | <a href="#">NM_008997</a>           | <a href="#">19326</a>  | RAB11B, member RAS oncogene fa | <a href="#">Rab11b</a>        | 1.031 | -0.221 | 0.831401 | 0.932333 |
| 6790 | 10350977 | <a href="#">ENSMUST00000060298</a>  | <a href="#">67647</a>  | RIKEN cDNA 4930523C07 gene     | <a href="#">4930523C07Rik</a> | 1.031 | 0.174  | 0.866652 | 0.946757 |
| 6791 | 10603011 | <a href="#">NM_009031</a>           | <a href="#">245688</a> | retinoblastoma binding protein | <a href="#">Rbbp7</a>         | 1.031 | 0.338  | 0.744938 | 0.891598 |
| 6792 | 10481700 | <a href="#">BC118617</a>            | <a href="#">227736</a> | RIKEN cDNA 1700019L03 gene     | <a href="#">1700019L03Rik</a> | 1.031 | 0.391  | 0.707372 | 0.872175 |
| 6793 | 10379410 | <a href="#">NM_021536</a>           | <a href="#">59040</a>  | ras homolog gene family, membe | <a href="#">Rhot1</a>         | 1.031 | 0.161  | 0.876201 | 0.950949 |
| 6794 | 10549871 | <a href="#">NM_146916</a>           | <a href="#">258918</a> | olfactory receptor 1346        | <a href="#">Olf1346</a>       | 1.031 | 0.181  | 0.8613   | 0.944277 |
| 6795 | 10345206 |                                     |                        |                                |                               | 1.031 | 0.312  | 0.764214 | 0.90173  |
| 6796 | 10490164 | <a href="#">ENSMUST00000029022</a>  | <a href="#">70065</a>  | ankyrin repeat domain 60       | <a href="#">Ankrd60</a>       | 1.031 | 0.947  | 0.374354 | 0.644466 |
| 6797 | 10546370 | <a href="#">BC099701</a>            | <a href="#">243547</a> | glutamate receptor interacting | <a href="#">Grip2</a>         | 1.031 | 0.148  | 0.886484 | 0.955393 |
| 6798 | 10592126 | <a href="#">NM_194257</a>           | <a href="#">109229</a> | protein phosphatase 4, regulat | <a href="#">Ppp4r1l</a>       | 1.031 | 0.118  | 0.909612 | 0.964056 |
| 6799 | 10345370 | <a href="#">NM_011206</a>           | <a href="#">19253</a>  | protein tyrosine phosphatase,  | <a href="#">Ptpn18</a>        | 1.031 | 0.625  | 0.551222 | 0.781273 |
| 6800 | 10527172 | <a href="#">NM_177681</a>           | <a href="#">231866</a> | zinc finger protein 12         | <a href="#">Zfp12</a>         | 1.031 | 0.747  | 0.478917 | 0.729132 |
| 6801 | 10430289 | <a href="#">NM_025931</a>           | <a href="#">67042</a>  | RAB, member of RAS oncogene fa | <a href="#">Rab14</a>         | 1.031 | 0.129  | 0.900797 | 0.960826 |
| 6802 | 10371277 | <a href="#">BC040349</a>            | <a href="#">237411</a> | RIKEN cDNA B230315N10 gene     | <a href="#">B230315N10Rik</a> | 1.031 | -0.034 | 0.973682 | 0.988697 |
| 6803 | 10509379 | <a href="#">NM_130879</a>           | <a href="#">170707</a> | ubiquitin specific peptidase 4 | <a href="#">Usp48</a>         | 1.031 | 0.469  | 0.652777 | 0.844541 |
| 6804 | 10493726 | <a href="#">NM_201407</a>           | <a href="#">229541</a> | DENN/MADD domain containing 4B | <a href="#">Dennd4b</a>       | 1.031 | 0.877  | 0.408519 | 0.672914 |
| 6805 | 10536787 |                                     |                        |                                |                               | 1.031 | 0.247  | 0.81186  | 0.924032 |
| 6806 | 10482089 | <a href="#">NM_026703</a>           | <a href="#">68375</a>  | NADH dehydrogenase (ubiquinone | <a href="#">Ndufa8</a>        | 1.031 | 0.431  | 0.679002 | 0.857533 |
| 6807 | 10581340 | <a href="#">NM_145824</a>           | <a href="#">74334</a>  | RAN binding protein 10         | <a href="#">Ranbp10</a>       | 1.031 | 0.374  | 0.719085 | 0.877614 |
| 6808 | 10365492 | <a href="#">ENSMUST000000116047</a> | <a href="#">382395</a> | predicted gene, EG382395       | <a href="#">EG382395</a>      | 1.031 | 0.677  | 0.519576 | 0.757547 |
| 6809 | 10413670 | <a href="#">NM_001081251</a>        | <a href="#">66923</a>  | polybromo 1                    | <a href="#">Pbrm1</a>         | 1.031 | 0.124  | 0.904906 | 0.963071 |
| 6810 | 10367036 | <a href="#">NM_080436</a>           | <a href="#">107605</a> | retinol dehydrogenase 1 (all t | <a href="#">Rdh1</a>          | 1.031 | 0.244  | 0.814025 | 0.925212 |
| 6811 | 10582299 | <a href="#">NM_133202</a>           | <a href="#">170732</a> | thyrotropin releasing hormone  | <a href="#">Trhr2</a>         | 1.031 | 0.368  | 0.723259 | 0.879946 |
| 6812 | 10428604 | <a href="#">NM_008764</a>           | <a href="#">18383</a>  | tumor necrosis factor receptor | <a href="#">Tnfrsf11b</a>     | 1.031 | 0.454  | 0.663104 | 0.849961 |
| 6813 | 10464359 | <a href="#">XR_031213</a>           | <a href="#">674623</a> | similar to Elongation factor 1 | <a href="#">LOC674623</a>     | 1.03  | 0.362  | 0.727751 | 0.88191  |
| 6814 | 10420572 | <a href="#">NM_170591</a>           | <a href="#">71844</a>  | nucleoporin like 1             | <a href="#">Nupl1</a>         | 1.03  | 0.386  | 0.710333 | 0.873031 |
| 6815 | 10519060 | <a href="#">NM_178931</a>           | <a href="#">230979</a> | tumor necrosis factor receptor | <a href="#">Tnfrsf14</a>      | 1.03  | 0.328  | 0.752487 | 0.895764 |
| 6816 | 10442331 | <a href="#">NM_023058</a>           | <a href="#">268930</a> | protein kinase, membrane assoc | <a href="#">Pkmyt1</a>        | 1.03  | 0.631  | 0.547261 | 0.778305 |
| 6817 | 10345445 | <a href="#">NM_145996</a>           | <a href="#">214855</a> | AT rich interactive domain 5A  | <a href="#">Arid5a</a>        | 1.03  | 0.84   | 0.428097 | 0.689167 |
| 6818 | 10439701 | <a href="#">NM_172511</a>           | <a href="#">213012</a> | abhydrolase domain containing  | <a href="#">Abhd10</a>        | 1.03  | 0.037  | 0.971311 | 0.988148 |
| 6819 | 10585358 | <a href="#">NM_001081152</a>        | <a href="#">244879</a> | nuclear protein in the AT regi | <a href="#">Npat</a>          | 1.03  | 0.008  | 0.993837 | 0.997702 |
| 6820 | 10384936 | <a href="#">NM_029344</a>           | <a href="#">75572</a>  | acylphosphatase 2, muscle type | <a href="#">Acyp2</a>         | 1.03  | 0.352  | 0.735227 | 0.886784 |
| 6821 | 10442986 | <a href="#">NM_028190</a>           | <a href="#">66978</a>  | Luc7 homolog (S. cerevisiae)-I | <a href="#">Luc7l</a>         | 1.03  | 0.378  | 0.716218 | 0.875663 |
| 6822 | 10359770 | <a href="#">NM_011137</a>           | <a href="#">18986</a>  | POU domain, class 2, transcrip | <a href="#">Pou2f1</a>        | 1.03  | 0.141  | 0.891541 | 0.957571 |
| 6823 | 10433032 | <a href="#">ENSMUST00000096143</a>  | <a href="#">223922</a> | activating transcription facto | <a href="#">Atf7</a>          | 1.03  | 0.747  | 0.47896  | 0.729132 |
| 6824 | 10590821 | <a href="#">BC115525</a>            | <a href="#">234912</a> | RIKEN cDNA 9230110C19 gene     | <a href="#">9230110C19Rik</a> | 1.03  | 0.238  | 0.818174 | 0.927633 |
| 6825 | 10381502 | <a href="#">ENSMUST00000078285</a>  | <a href="#">73887</a>  | RIKEN cDNA 4930417O22 gene     | <a href="#">4930417O22Rik</a> | 1.03  | 1.109  | 0.303191 | 0.579207 |
| 6826 | 10410380 |                                     |                        |                                |                               | 1.03  | 0.818  | 0.439705 | 0.699031 |
| 6827 | 10532590 | <a href="#">XM_912851</a>           | <a href="#">74376</a>  | myosin XVIIIb                  | <a href="#">Myo18b</a>        | 1.03  | 0.29   | 0.780049 | 0.910713 |
| 6828 | 10544219 | <a href="#">NM_139294</a>           | <a href="#">109880</a> | Braf transforming gene         | <a href="#">Braf</a>          | 1.03  | 0.431  | 0.678912 | 0.857533 |
| 6829 | 10399391 | <a href="#">NM_177331</a>           | <a href="#">209334</a> | Gen homolog 1, endonuclease (D | <a href="#">Gen1</a>          | 1.03  | -0.048 | 0.963299 | 0.985684 |
| 6830 | 10512465 | <a href="#">NM_177377</a>           | <a href="#">329831</a> | RIKEN cDNA 4833436C18 gene     | <a href="#">4833436C18Rik</a> | 1.03  | 0.548  | 0.600531 | 0.812284 |
| 6831 | 10379880 | <a href="#">BC048674</a>            | <a href="#">73634</a>  | RIKEN cDNA 1700125H20 gene     | <a href="#">1700125H20Rik</a> | 1.03  | 0.565  | 0.588898 | 0.805202 |
| 6832 | 10549733 | <a href="#">NM_173008</a>           | <a href="#">269855</a> | RIKEN cDNA A430110N23 gene     | <a href="#">A430110N23Rik</a> | 1.03  | 0.607  | 0.562764 | 0.789779 |
| 6833 | 10550000 | <a href="#">NM_177000</a>           | <a href="#">231000</a> | GDP-mannose                    | <a href="#">G</a>             | 1.03  | 1.03   | 0.23210  | 0.21210  |

|      |          |                                    |                           |                                   |                                    |       |        |          |          |
|------|----------|------------------------------------|---------------------------|-----------------------------------|------------------------------------|-------|--------|----------|----------|
| 6833 | 10588836 | <a href="#">NM 177910</a>          | <a href="#">531026</a>    | pyrophosphorylase                 | <a href="#">Gmppb</a>              | 1.03  | 1.03   | 0.33649  | 0.61218  |
| 6834 | 10481259 | <a href="#">AK158259</a>           | <a href="#">100038452</a> | predicted gene,<br>OTTMUSG0000001 | <a href="#">OTTMUSG00000011627</a> | 1.03  | 0.24   | 0.817336 | 0.927212 |
| 6835 | 10471337 | <a href="#">NM 145145</a>          | <a href="#">99011</a>     | protein-O-mannosyltransferase     | <a href="#">Pomt1</a>              | 1.03  | 0.548  | 0.600108 | 0.812128 |
| 6836 | 10608204 |                                    |                           |                                   |                                    | 1.03  | 0.417  | 0.688932 | 0.863319 |
| 6837 | 10365098 | <a href="#">NM 009325</a>          | <a href="#">21390</a>     | thromboxane A2 receptor           | <a href="#">Tbxa2r</a>             | 1.03  | 0.925  | 0.384668 | 0.654022 |
| 6838 | 10570029 | <a href="#">NM 001081397</a>       | <a href="#">244281</a>    | myosin XVI                        | <a href="#">Myo16</a>              | 1.03  | 0.914  | 0.390329 | 0.658911 |
| 6839 | 10527934 |                                    |                           |                                   |                                    | 1.03  | 0.229  | 0.824932 | 0.929565 |
| 6840 | 10418129 |                                    |                           |                                   |                                    | 1.03  | 0.805  | 0.446299 | 0.704033 |
| 6841 | 10364489 | <a href="#">NM 023304</a>          | <a href="#">67112</a>     | fibroblast growth factor 22       | <a href="#">Fgf22</a>              | 1.03  | 1.038  | 0.332803 | 0.608825 |
| 6842 | 10371025 | <a href="#">NM 001038655</a>       | <a href="#">14708</a>     | guanine nucleotide binding pro    | <a href="#">Gng7</a>               | 1.03  | 0.443  | 0.671079 | 0.853953 |
| 6843 | 10471387 | <a href="#">NM 028412</a>          | <a href="#">68379</a>     | CDKN1A interacting zinc finger    | <a href="#">Ciz1</a>               | 1.03  | 0.484  | 0.642998 | 0.838239 |
| 6844 | 10540579 | <a href="#">NM 026849</a>          | <a href="#">97287</a>     | myotubularin related protein 1    | <a href="#">Mtmr14</a>             | 1.03  | 0.657  | 0.531377 | 0.765618 |
| 6845 | 10508737 | <a href="#">NM 010166</a>          | <a href="#">14050</a>     | eyes absent 3 homolog (Drosoph    | <a href="#">Eya3</a>               | 1.03  | 0.258  | 0.803419 | 0.920133 |
| 6846 | 10544798 | <a href="#">NM 008263</a>          | <a href="#">15395</a>     | homeo box A10                     | <a href="#">Hoxa10</a>             | 1.03  | -0.082 | 0.936664 | 0.975223 |
| 6847 | 10526514 | <a href="#">NM 021719</a>          | <a href="#">60363</a>     | claudin 15                        | <a href="#">Cldn15</a>             | 1.03  | 0.787  | 0.456223 | 0.712479 |
| 6848 | 10446346 | <a href="#">XR 034674</a>          | <a href="#">433129</a>    | similar to Obox6 protein          | <a href="#">LOC433129</a>          | 1.03  | 1.142  | 0.289839 | 0.566077 |
| 6849 | 10350341 |                                    |                           |                                   |                                    | 1.03  | 0.115  | 0.91164  | 0.964691 |
| 6850 | 10570894 | <a href="#">NM 001110783</a>       | <a href="#">11733</a>     | ankyrin 1, erythroid              | <a href="#">Ank1</a>               | 1.03  | 0.34   | 0.74375  | 0.891034 |
| 6851 | 10541741 | <a href="#">NM 145385</a>          | <a href="#">30853</a>     | myeloid leukemia factor 2         | <a href="#">Mlf2</a>               | 1.03  | 0.12   | 0.908125 | 0.963723 |
| 6852 | 10586880 | <a href="#">NM 146224</a>          | <a href="#">235469</a>    | suppressor of hairy wing homol    | <a href="#">Suhw4</a>              | 1.03  | 0.637  | 0.544018 | 0.776161 |
| 6853 | 10404697 | <a href="#">ENSMUST00000069457</a> | <a href="#">791406</a>    | predicted gene,<br>ENSMUSG0000005 | <a href="#">ENSMUSG00000055732</a> | 1.03  | 0.508  | 0.626835 | 0.83034  |
| 6854 | 10526363 | <a href="#">NM 008898</a>          | <a href="#">18984</a>     | P450 (cytochrome) oxidoreducta    | <a href="#">Por</a>                | 1.03  | -0.508 | 0.6269   | 0.830369 |
| 6855 | 10546184 | <a href="#">NM 008881</a>          | <a href="#">18844</a>     | plexin A1                         | <a href="#">Plxna1</a>             | 1.03  | 0.223  | 0.829388 | 0.93131  |
| 6856 | 10603310 |                                    |                           |                                   |                                    | 1.03  | 0.342  | 0.74227  | 0.890171 |
| 6857 | 10488584 | <a href="#">AK016149</a>           | <a href="#">75283</a>     | RIKEN cDNA 4930556L07 gene        | <a href="#">4930556L07Rik</a>      | 1.03  | 0.454  | 0.663087 | 0.849961 |
| 6858 | 10377368 | <a href="#">NM 009080</a>          | <a href="#">19941</a>     | ribosomal protein L26             | <a href="#">Rpl26</a>              | 1.029 | -0.192 | 0.852926 | 0.940713 |
| 6859 | 10573691 | <a href="#">ENSMUST00000098532</a> | <a href="#">666945</a>    | predicted gene,<br>ENSMUSG0000007 | <a href="#">ENSMUSG00000074178</a> | 1.029 | 0.723  | 0.492244 | 0.738375 |
| 6860 | 10386551 | <a href="#">NM 022009</a>          | <a href="#">14248</a>     | flightless I homolog (Drosophi    | <a href="#">Flii</a>               | 1.029 | -0.15  | 0.885062 | 0.954881 |
| 6861 | 10483789 | <a href="#">NM 007967</a>          | <a href="#">14029</a>     | even skipped homeotic gene 2 h    | <a href="#">Evx2</a>               | 1.029 | 0.224  | 0.828959 | 0.931175 |
| 6862 | 10559399 | <a href="#">NM 175632</a>          | <a href="#">232790</a>    | osteoclast associated receptor    | <a href="#">Oscar</a>              | 1.029 | 0.959  | 0.368431 | 0.639213 |
| 6863 | 10568865 | <a href="#">BC145730</a>           | <a href="#">381933</a>    | RIKEN cDNA 6430531B16<br>gene     | <a href="#">6430531B16Rik</a>      | 1.029 | 0.507  | 0.627346 | 0.83052  |
| 6864 | 10430783 | <a href="#">NM 030229</a>          | <a href="#">78929</a>     | polymerase (RNA) III (DNA<br>dire | <a href="#">Polr3h</a>             | 1.029 | 0.053  | 0.959034 | 0.98454  |
| 6865 | 10467599 | <a href="#">NM 015748</a>          | <a href="#">20562</a>     | slit homolog 1 (Drosophila)       | <a href="#">Slit1</a>              | 1.029 | 0.549  | 0.599801 | 0.812076 |
| 6866 | 10540659 | <a href="#">NM 133923</a>          | <a href="#">101100</a>    | tubulin tyrosine ligase-like f    | <a href="#">Ttl3</a>               | 1.029 | 0.65   | 0.535626 | 0.769137 |
| 6867 | 10592160 | <a href="#">XM 892150</a>          | <a href="#">627480</a>    | predicted gene, EG627480          | <a href="#">EG627480</a>           | 1.029 | 0.588  | 0.574235 | 0.797076 |
| 6868 | 10515253 | <a href="#">NM 025641</a>          | <a href="#">66576</a>     | ubiquinol-cytochrome c reducta    | <a href="#">Uqcrh</a>              | 1.029 | 0.282  | 0.785936 | 0.912636 |
| 6869 | 10534921 | <a href="#">NM 144913</a>          | <a href="#">231803</a>    | methylphosphate capping<br>enzyme | <a href="#">Mepce</a>              | 1.029 | -0.587 | 0.574924 | 0.797076 |
| 6870 | 10603525 | <a href="#">NM 001081565</a>       | <a href="#">631002</a>    | synovial sarcoma, X member B,     | <a href="#">Ssxb8</a>              | 1.029 | 0.63   | 0.548023 | 0.778543 |
| 6871 | 10562629 |                                    |                           |                                   |                                    | 1.029 | 1.111  | 0.302394 | 0.578522 |
| 6872 | 10439009 | <a href="#">NM 007470</a>          | <a href="#">11815</a>     | apolipoprotein D                  | <a href="#">Apod</a>               | 1.029 | 0.437  | 0.674885 | 0.855557 |
| 6873 | 10546944 | <a href="#">NM 175101</a>          | <a href="#">66087</a>     | transmembrane protein 111         | <a href="#">Tmem111</a>            | 1.029 | -0.041 | 0.968288 | 0.987245 |
| 6874 | 10511490 |                                    |                           |                                   |                                    | 1.029 | 0.493  | 0.636708 | 0.834887 |
| 6875 | 10475280 | <a href="#">NM 029475</a>          | <a href="#">75894</a>     | adenosine deaminase-like          | <a href="#">Adal</a>               | 1.029 | 0.025  | 0.980772 | 0.991919 |
| 6876 | 10601314 | <a href="#">NM 009440</a>          | <a href="#">22127</a>     | testis specific X-linked gene     | <a href="#">Tsx</a>                | 1.029 | 0.543  | 0.603267 | 0.814526 |
| 6877 | 10534990 | <a href="#">NM 009315</a>          | <a href="#">21343</a>     | TAF6 RNA polymerase II,<br>TATA b | <a href="#">Taf6</a>               | 1.029 | 0.111  | 0.914776 | 0.966446 |
| 6878 | 10452440 | <a href="#">ENSMUST00000050753</a> | <a href="#">320004</a>    | RIKEN cDNA A930002H24<br>gene     | <a href="#">A930002H24Rik</a>      | 1.029 | 0.295  | 0.776042 | 0.908612 |
| 6879 | 10414799 | <a href="#">ENSMUST00000103605</a> | <a href="#">100046023</a> | similar to TRAV8D-2               | <a href="#">LOC100046023</a>       | 1.029 | 0.269  | 0.795592 | 0.916955 |
| 6880 | 10486029 | <a href="#">NM 025675</a>          | <a href="#">66632</a>     | ATP binding domain 4              | <a href="#">Atpbd4</a>             | 1.029 | -0.49  | 0.638946 | 0.835923 |
| 6881 | 10488762 | <a href="#">NM 009228</a>          | <a href="#">20648</a>     | syntrophin, acidic 1              | <a href="#">Snta1</a>              | 1.029 | 0.548  | 0.59996  | 0.812084 |
| 6882 | 10570199 | <a href="#">ENSMUST00000068194</a> | <a href="#">70966</a>     | RIKEN cDNA 4931415C17             | <a href="#">4931415C17Rik</a>      | 1.029 | 0.372  | 0.720668 | 0.878411 |

|      |          |                                    |                           | gene                            |                                    |       |        |          |          |
|------|----------|------------------------------------|---------------------------|---------------------------------|------------------------------------|-------|--------|----------|----------|
| 6883 | 10371041 | <a href="#">NM_024499</a>          | <a href="#">52551</a>     | small glutamine-rich tetratric  | <a href="#">Sgta</a>               | 1.029 | 0.392  | 0.706246 | 0.871814 |
| 6884 | 10414271 | <a href="#">NM_008964</a>          | <a href="#">19217</a>     | prostaglandin E receptor 2 (su  | <a href="#">Ptger2</a>             | 1.029 | 0.373  | 0.719654 | 0.877935 |
| 6885 | 10522411 | <a href="#">BC016523</a>           | <a href="#">231293</a>    | RIKEN cDNA C130090K23 gene      | <a href="#">C130090K23Rik</a>      | 1.029 | 0.398  | 0.701889 | 0.869258 |
| 6886 | 10353519 | <a href="#">NM_025746</a>          | <a href="#">66755</a>     | RIKEN cDNA 4933415F23 gene      | <a href="#">4933415F23Rik</a>      | 1.029 | 0.498  | 0.63352  | 0.833323 |
| 6887 | 10351788 | <a href="#">NM_026234</a>          | <a href="#">67556</a>     | phosphatidylinositol glycan an  | <a href="#">Pigm</a>               | 1.029 | 0.109  | 0.916223 | 0.966842 |
| 6888 | 10495306 | <a href="#">NM_026831</a>          | <a href="#">68753</a>     | myosin binding protein H-like   | <a href="#">Mybphl</a>             | 1.029 | 0.528  | 0.613106 | 0.820787 |
| 6889 | 10418218 | <a href="#">NM_032008</a>          | <a href="#">83997</a>     | sarcolemma associated protein   | <a href="#">Slmap</a>              | 1.029 | 0.17   | 0.869471 | 0.947682 |
| 6890 | 10561819 | <a href="#">NM_177889</a>          | <a href="#">330502</a>    | zinc finger protein 82          | <a href="#">Zfp82</a>              | 1.029 | -0.158 | 0.878506 | 0.95179  |
| 6891 | 10435724 | <a href="#">NM_019804</a>          | <a href="#">56375</a>     | UDP-Gal:betaGlcNAc beta 1,4-ga  | <a href="#">B4galt4</a>            | 1.029 | 0.168  | 0.871518 | 0.948642 |
| 6892 | 10573401 | <a href="#">NM_198020</a>          | <a href="#">212528</a>    | TRM1 tRNA methyltransferase 1   | <a href="#">Trmt1</a>              | 1.029 | 0.135  | 0.896205 | 0.95935  |
| 6893 | 10562408 | <a href="#">NM_175140</a>          | <a href="#">68947</a>     | carbohydrate (N-acetyl)galactos | <a href="#">Chst8</a>              | 1.029 | 0.405  | 0.696972 | 0.867134 |
| 6894 | 10520718 | <a href="#">NM_153680</a>          | <a href="#">266781</a>    | sorting nexin 17                | <a href="#">Snx17</a>              | 1.029 | 0.605  | 0.563801 | 0.790309 |
| 6895 | 10476560 | <a href="#">ENSMUST00000099307</a> | <a href="#">319909</a>    | RIKEN cDNA 5430433G21 gene      | <a href="#">5430433G21Rik</a>      | 1.029 | 0.291  | 0.778903 | 0.910097 |
| 6896 | 10564262 | <a href="#">NM_011746</a>          | <a href="#">22652</a>     | makorin, ring finger protein,   | <a href="#">Mkrm3</a>              | 1.029 | 0.251  | 0.808734 | 0.92302  |
| 6897 | 10428119 | <a href="#">NM_053071</a>          | <a href="#">12864</a>     | cytochrome c oxidase, subunit   | <a href="#">Cox6c</a>              | 1.029 | 0.317  | 0.759891 | 0.899364 |
| 6898 | 10475394 | <a href="#">NM_212450</a>          | <a href="#">329506</a>    | CTD (carboxy-terminal domain,   | <a href="#">Ctdspl2</a>            | 1.029 | 0.44   | 0.672583 | 0.854651 |
| 6899 | 10444218 |                                    |                           |                                 |                                    | 1.029 | 0.823  | 0.436673 | 0.696302 |
| 6900 | 10529237 | <a href="#">ENSMUST00000101373</a> | <a href="#">100038480</a> | predicted gene, ENSMUSG0000007  | <a href="#">ENSMUSG00000073053</a> | 1.029 | 0.626  | 0.550871 | 0.781094 |
| 6901 | 10404024 | <a href="#">NM_153173</a>          | <a href="#">69386</a>     | histone cluster 1, H4h          | <a href="#">Hist1h4h</a>           | 1.029 | 0.122  | 0.905965 | 0.963405 |
| 6902 | 10425293 | <a href="#">NM_028634</a>          | <a href="#">73739</a>     | chibby homolog 1 (Drosophila)   | <a href="#">Cby1</a>               | 1.029 | -0.033 | 0.97458  | 0.989224 |
| 6903 | 10350840 | <a href="#">NM_028333</a>          | <a href="#">72713</a>     | angiopoietin-like 1             | <a href="#">Angptl1</a>            | 1.029 | 0.109  | 0.916185 | 0.966842 |
| 6904 | 10555574 |                                    |                           |                                 |                                    | 1.029 | 0.011  | 0.991298 | 0.99653  |
| 6905 | 10508253 | <a href="#">NM_198618</a>          | <a href="#">242667</a>    | discs, large (Drosophila) homo  | <a href="#">Dlgap3</a>             | 1.029 | 0.401  | 0.699753 | 0.868438 |
| 6906 | 10562687 | <a href="#">ENSMUST00000107974</a> | <a href="#">210094</a>    | RIKEN cDNA A230106M20 gene      | <a href="#">A230106M20Rik</a>      | 1.029 | 0.258  | 0.803329 | 0.920129 |
| 6907 | 10473880 | <a href="#">NM_172668</a>          | <a href="#">228357</a>    | low density lipoprotein recept  | <a href="#">Lrp4</a>               | 1.029 | 0.93   | 0.382316 | 0.651795 |
| 6908 | 10361063 |                                    |                           |                                 |                                    | 1.029 | 0.125  | 0.90415  | 0.962767 |
| 6909 | 10592926 | <a href="#">NM_027865</a>          | <a href="#">71687</a>     | transmembrane protein 25        | <a href="#">Tmem25</a>             | 1.029 | 0.565  | 0.589498 | 0.805725 |
| 6910 | 10529133 | <a href="#">NM_175311</a>          | <a href="#">101023</a>    | zinc finger protein 513         | <a href="#">Zfp513</a>             | 1.029 | 0.783  | 0.458298 | 0.713568 |
| 6911 | 10346116 |                                    |                           |                                 |                                    | 1.028 | 0.362  | 0.72762  | 0.881903 |
| 6912 | 10397342 | <a href="#">BC049940</a>           | <a href="#">72350</a>     | RIKEN cDNA 2810002I04 gene      | <a href="#">2810002I04Rik</a>      | 1.028 | 0.175  | 0.865571 | 0.946261 |
| 6913 | 10533628 | <a href="#">BC117082</a>           | <a href="#">76399</a>     | interleukin 31                  | <a href="#">Il31</a>               | 1.028 | 0.86   | 0.417406 | 0.680204 |
| 6914 | 10455065 | <a href="#">NM_053130</a>          | <a href="#">93876</a>     | protocadherin beta 5            | <a href="#">Pcdhb5</a>             | 1.028 | 0.864  | 0.415264 | 0.678399 |
| 6915 | 10472058 | <a href="#">NM_175238</a>          | <a href="#">51869</a>     | Rap1 interacting factor 1 homo  | <a href="#">Rif1</a>               | 1.028 | 0.118  | 0.90906  | 0.963765 |
| 6916 | 10520247 | <a href="#">NR_003953</a>          | <a href="#">72252</a>     | RIKEN cDNA 1700022A21 gene      | <a href="#">1700022A21Rik</a>      | 1.028 | 1.087  | 0.311971 | 0.588349 |
| 6917 | 10416110 | <a href="#">NM_001034881</a>       | <a href="#">432870</a>    | predicted gene, EG432870        | <a href="#">EG432870</a>           | 1.028 | 0.144  | 0.889321 | 0.956449 |
| 6918 | 10415095 | <a href="#">BC011283</a>           | <a href="#">58248</a>     | RIKEN cDNA 1700123O20 gene      | <a href="#">1700123O20Rik</a>      | 1.028 | 0.398  | 0.702043 | 0.869258 |
| 6919 | 10400109 | <a href="#">NM_172575</a>          | <a href="#">246196</a>    | zinc finger protein 277         | <a href="#">Zfp277</a>             | 1.028 | 0.293  | 0.777732 | 0.909562 |
| 6920 | 10571797 | <a href="#">NM_029569</a>          | <a href="#">76294</a>     | ankyrin repeat and SOCs box-co  | <a href="#">Asb5</a>               | 1.028 | 0.512  | 0.623647 | 0.828031 |
| 6921 | 10481240 | <a href="#">NM_001113574</a>       | <a href="#">67382</a>     | bromodomain containing 3        | <a href="#">Brd3</a>               | 1.028 | -0.06  | 0.953416 | 0.982042 |
| 6922 | 10537921 | <a href="#">NM_146175</a>          | <a href="#">101095</a>    | zinc finger protein 282         | <a href="#">Zfp282</a>             | 1.028 | 0.283  | 0.78513  | 0.912507 |
| 6923 | 10582477 | <a href="#">NM_030176</a>          | <a href="#">78779</a>     | spermatogenesis associated 2-I  | <a href="#">Spata2L</a>            | 1.028 | 0.859  | 0.417832 | 0.680583 |
| 6924 | 10382104 |                                    |                           |                                 |                                    | 1.028 | 0.258  | 0.80394  | 0.92048  |
| 6925 | 10590933 | <a href="#">NM_177905</a>          | <a href="#">330890</a>    | piwi-like homolog 4 (Drosophil  | <a href="#">Piwil4</a>             | 1.028 | 0.993  | 0.353005 | 0.625939 |
| 6926 | 10498871 | <a href="#">NM_027495</a>          | <a href="#">70652</a>     | transmembrane protein 144       | <a href="#">Tmem144</a>            | 1.028 | 0.422  | 0.685203 | 0.860862 |
| 6927 | 10379564 | <a href="#">NM_010716</a>          | <a href="#">16882</a>     | ligase III, DNA, ATP-dependent  | <a href="#">Lig3</a>               | 1.028 | 0.023  | 0.982604 | 0.992413 |
| 6928 | 10520499 | <a href="#">NM_001033460</a>       | <a href="#">381738</a>    | gene model 1060, (NCBI)         | <a href="#">Gm1060</a>             | 1.028 | 0.184  | 0.859106 | 0.943452 |
| 6929 | 10578423 | <a href="#">XM_001473828</a>       | <a href="#">100045396</a> | hypothetical protein LOC100045  | <a href="#">LOC100045396</a>       | 1.028 | -0.351 | 0.735438 | 0.886804 |
| 6930 | 10360983 | <a href="#">BC048476</a>           | <a href="#">56330</a>     | programmed cell death 5         | <a href="#">Pcd5</a>               | 1.028 | 0.053  | 0.959236 | 0.984606 |
| 6931 | 10482167 | <a href="#">NM_146253</a>          | <a href="#">241322</a>    | zinc finger and BTB domain con  | <a href="#">Zbtb6</a>              | 1.028 | -0.258 | 0.80364  | 0.920237 |
| 6932 | 10495935 | <a href="#">BC085187</a>           | <a href="#">71643</a>     | RIKEN cDNA 4930422G04 gene      | <a href="#">4930422G04Rik</a>      | 1.028 | 0.299  | 0.773598 | 0.9067   |

|      |          |                                    |                        |                                |                                    |       |        |          |          |
|------|----------|------------------------------------|------------------------|--------------------------------|------------------------------------|-------|--------|----------|----------|
| 6933 | 10467182 | <a href="#">NM_008315</a>          | <a href="#">15566</a>  | 5-hydroxytryptamine (serotonin | <a href="#">Htr7</a>               | 1.028 | 0.364  | 0.726051 | 0.88142  |
| 6934 | 10458882 | <a href="#">XR_033028</a>          | <a href="#">674866</a> | similar to glyceraldehyde-3-ph | <a href="#">LOC674866</a>          | 1.028 | 0.235  | 0.820507 | 0.928587 |
| 6935 | 10597432 | <a href="#">NM_153585</a>          | <a href="#">78893</a>  | CCR4-NOT transcription complex | <a href="#">Cnot10</a>             | 1.028 | 0.344  | 0.740744 | 0.889595 |
| 6936 | 10510668 | <a href="#">NM_033042</a>          | <a href="#">85030</a>  | tumor necrosis factor receptor | <a href="#">Tnfrsf25</a>           | 1.028 | 0.727  | 0.490142 | 0.737262 |
| 6937 | 10455647 | <a href="#">NM_134131</a>          | <a href="#">106869</a> | tumor necrosis factor, alpha-i | <a href="#">Tnfaip8</a>            | 1.028 | -0.476 | 0.64824  | 0.841813 |
| 6938 | 10431848 | <a href="#">NR_003627</a>          | <a href="#">402773</a> | RIKEN cDNA D030018L15 gene     | <a href="#">D030018L15Rik</a>      | 1.028 | 0.564  | 0.589973 | 0.805977 |
| 6939 | 10456727 | <a href="#">NM_027727</a>          | <a href="#">69190</a>  | dymeclin                       | <a href="#">Dym</a>                | 1.028 | 0.48   | 0.645472 | 0.839972 |
| 6940 | 10404975 | <a href="#">NM_031166</a>          | <a href="#">15904</a>  | inhibitor of DNA binding 4     | <a href="#">Id4</a>                | 1.028 | 0.063  | 0.951404 | 0.981144 |
| 6941 | 10405535 | <a href="#">BC051430</a>           | <a href="#">78521</a>  | RIKEN cDNA B230219D22 gene     | <a href="#">B230219D22Rik</a>      | 1.028 | 0.17   | 0.869374 | 0.947675 |
| 6942 | 10407316 | <a href="#">ENSMUST00000099155</a> | <a href="#">670198</a> | predicted gene, ENSMUSG0000007 | <a href="#">ENSMUSG00000074642</a> | 1.028 | 0.307  | 0.767226 | 0.903106 |
| 6943 | 10544648 | <a href="#">NM_018769</a>          | <a href="#">54722</a>  | deafness, autosomal dominant 5 | <a href="#">Dfna5h</a>             | 1.028 | 0.393  | 0.70544  | 0.871557 |
| 6944 | 10509137 | <a href="#">NM_008254</a>          | <a href="#">15356</a>  | 3-hydroxy-3-methylglutaryl-Co  | <a href="#">Hmgcl</a>              | 1.028 | 0.191  | 0.853836 | 0.940875 |
| 6945 | 10542522 | <a href="#">NM_144920</a>          | <a href="#">109135</a> | pleckstrin homology domain con | <a href="#">Plekha5</a>            | 1.028 | 0.23   | 0.824798 | 0.929565 |
| 6946 | 10516859 | <a href="#">NM_145393</a>          | <a href="#">213541</a> | YTH domain family 2            | <a href="#">Ythdf2</a>             | 1.028 | 0.28   | 0.787317 | 0.913152 |
| 6947 | 10455801 | <a href="#">NM_019996</a>          | <a href="#">56698</a>  | RNA U, small nuclear RNA expor | <a href="#">Rnuxa</a>              | 1.028 | 0.038  | 0.970696 | 0.988127 |
| 6948 | 10439798 | <a href="#">NM_001110017</a>       | <a href="#">224170</a> | DAZ interacting protein 3, zin | <a href="#">Dzip3</a>              | 1.028 | 0.548  | 0.600388 | 0.812266 |
| 6949 | 10418817 | <a href="#">NM_009891</a>          | <a href="#">12647</a>  | choline acetyltransferase      | <a href="#">Chat</a>               | 1.028 | 0.409  | 0.694112 | 0.865705 |
| 6950 | 10362450 |                                    |                        |                                |                                    | 1.028 | 0.535  | 0.608693 | 0.817883 |
| 6951 | 10597773 |                                    |                        |                                |                                    | 1.028 | 1.342  | 0.220302 | 0.488992 |
| 6952 | 10597279 | <a href="#">NM_017466</a>          | <a href="#">54199</a>  | chemokine (C-C motif) receptor | <a href="#">Ccr12</a>              | 1.028 | 0.422  | 0.685261 | 0.860862 |
| 6953 | 10452609 | <a href="#">NM_001033340</a>       | <a href="#">240131</a> | leucine rich repeat containing | <a href="#">Lrrc30</a>             | 1.028 | 1.265  | 0.24505  | 0.518209 |
| 6954 | 10531288 |                                    |                        |                                |                                    | 1.028 | 0.549  | 0.599339 | 0.811907 |
| 6955 | 10353794 | <a href="#">BC040511</a>           | <a href="#">214469</a> | cDNA sequence BC043098         | <a href="#">BC043098</a>           | 1.028 | -0.05  | 0.961097 | 0.985069 |
| 6956 | 10405211 | <a href="#">NM_011817</a>          | <a href="#">23882</a>  | growth arrest and DNA-damage-i | <a href="#">Gadd45g</a>            | 1.028 | 0.981  | 0.358407 | 0.630567 |
| 6957 | 10514896 | <a href="#">NM_025617</a>          | <a href="#">66526</a>  | RIKEN cDNA 2210012G02 gene     | <a href="#">2210012G02Rik</a>      | 1.028 | 0.547  | 0.601044 | 0.812694 |
| 6958 | 10416423 | <a href="#">NM_198642</a>          | <a href="#">271221</a> | RIKEN cDNA 5031414D18 gene     | <a href="#">5031414D18Rik</a>      | 1.028 | 0.232  | 0.822623 | 0.929111 |
| 6959 | 10493317 | <a href="#">BC016616</a>           | <a href="#">76022</a>  | RIKEN cDNA 5830417I10 gene     | <a href="#">5830417I10Rik</a>      | 1.028 | 0.349  | 0.737303 | 0.887888 |
| 6960 | 10486722 | <a href="#">NM_013735</a>          | <a href="#">27223</a>  | transformation related protein | <a href="#">Trp53bp1</a>           | 1.028 | 0.162  | 0.875698 | 0.950842 |
| 6961 | 10583459 | <a href="#">NM_175110</a>          | <a href="#">66662</a>  | RIKEN cDNA 5730577I03 gene     | <a href="#">5730577I03Rik</a>      | 1.028 | 0.352  | 0.734957 | 0.886784 |
| 6962 | 10524229 | <a href="#">ENSMUST00000059200</a> | <a href="#">231603</a> | RIKEN cDNA A630023P12 gene     | <a href="#">A630023P12Rik</a>      | 1.028 | 0.316  | 0.761255 | 0.900424 |
| 6963 | 10440483 | <a href="#">NM_016755</a>          | <a href="#">11957</a>  | ATP synthase, H+ transporting, | <a href="#">Atp5j</a>              | 1.028 | 0.062  | 0.952351 | 0.981503 |
| 6964 | 10586971 | <a href="#">NM_175485</a>          | <a href="#">235472</a> | protogenin homolog (Gallus gal | <a href="#">Prtg</a>               | 1.028 | 0.224  | 0.829334 | 0.93131  |
| 6965 | 10604958 | <a href="#">NM_001085506</a>       | <a href="#">236852</a> | melanoma antigen family A, 10  | <a href="#">Magea10</a>            | 1.028 | 0.501  | 0.631026 | 0.832075 |
| 6966 | 10434067 | <a href="#">NM_029945</a>          | <a href="#">77626</a>  | sphingomyelin phosphodiesteras | <a href="#">Smpd4</a>              | 1.027 | 0.074  | 0.942677 | 0.977825 |
| 6967 | 10396231 | <a href="#">ENSMUST00000021482</a> | <a href="#">75266</a>  | RIKEN cDNA 4930553D19 gene     | <a href="#">4930553D19Rik</a>      | 1.027 | 0.637  | 0.543698 | 0.775862 |
| 6968 | 10507905 | <a href="#">NM_011141</a>          | <a href="#">18991</a>  | POU domain, class 3, transcrip | <a href="#">Pou3f1</a>             | 1.027 | 0.154  | 0.881529 | 0.953086 |
| 6969 | 10581523 | <a href="#">NM_009353</a>          | <a href="#">21750</a>  | telomeric repeat binding facto | <a href="#">Terf2</a>              | 1.027 | 0.203  | 0.845002 | 0.937001 |
| 6970 | 10498168 | <a href="#">NM_027148</a>          | <a href="#">69639</a>  | exosome component 8            | <a href="#">Exosc8</a>             | 1.027 | 0.215  | 0.835462 | 0.933323 |
| 6971 | 10538459 | <a href="#">NM_007472</a>          | <a href="#">11826</a>  | aquaporin 1                    | <a href="#">Aqp1</a>               | 1.027 | 0.381  | 0.714244 | 0.874919 |
| 6972 | 10445544 | <a href="#">NM_053250</a>          | <a href="#">114570</a> | cysteine-rich protein 3        | <a href="#">Crip3</a>              | 1.027 | 0.543  | 0.603692 | 0.814811 |
| 6973 | 10465912 | <a href="#">NM_007999</a>          | <a href="#">14156</a>  | flap structure specific endonu | <a href="#">Fen1</a>               | 1.027 | 0.036  | 0.972145 | 0.98815  |
| 6974 | 10481155 | <a href="#">NM_207234</a>          | <a href="#">227656</a> | REX4, RNA exonuclease 4 homolo | <a href="#">Rexo4</a>              | 1.027 | -0.036 | 0.971986 | 0.98815  |
| 6975 | 10346150 | <a href="#">NM_019790</a>          | <a href="#">56363</a>  | transmembrane protein with EGF | <a href="#">Tmeff2</a>             | 1.027 | -0.04  | 0.969558 | 0.987616 |
| 6976 | 10560862 | <a href="#">BC145686</a>           | <a href="#">641361</a> | RIKEN cDNA 2310033E01 gene     | <a href="#">2310033E01Rik</a>      | 1.027 | 0.702  | 0.504878 | 0.747036 |
| 6977 | 10490541 | <a href="#">ENSMUST00000098982</a> | <a href="#">676369</a> | predicted gene, OTTMUSG0000001 | <a href="#">OTTMUSG00000016394</a> | 1.027 | 0.424  | 0.684183 | 0.86012  |
| 6978 | 10527012 | <a href="#">NM_008494</a>          | <a href="#">16848</a>  | LFNG O-fucosylpeptide 3-beta-N | <a href="#">Lfng</a>               | 1.027 | 0.15   | 0.884562 | 0.954633 |
| 6979 | 10412005 | <a href="#">NM_176005</a>          | <a href="#">110740</a> | RIKEN cDNA C230078M08          | <a href="#">C230078M08Rik</a>      | 1.027 | 0.51   | 0.665140 | 0.815775 |

|      |          |                                    |                           |                                   |                                    |       |        |          |          |
|------|----------|------------------------------------|---------------------------|-----------------------------------|------------------------------------|-------|--------|----------|----------|
| 6979 | 10443007 | <a href="#">NM_176992</a>          | <a href="#">519749</a>    | gene                              | <a href="#">C230078M08Rik</a>      | 1.027 | 0.54   | 0.605149 | 0.815765 |
| 6980 | 10530096 |                                    |                           |                                   |                                    | 1.027 | 0.148  | 0.886704 | 0.955515 |
| 6981 | 10401774 | <a href="#">ENSMUST00000051601</a> | <a href="#">217738</a>    | thrombospondin, type I, domain    | <a href="#">Thsd3</a>              | 1.027 | 0.244  | 0.814199 | 0.925212 |
| 6982 | 10599222 | <a href="#">NM_019668</a>          | <a href="#">22209</a>     | ubiquitin-conjugating enzyme E    | <a href="#">Ube2a</a>              | 1.027 | -0.208 | 0.841134 | 0.935777 |
| 6983 | 10447315 |                                    |                           |                                   |                                    | 1.027 | 0.302  | 0.771294 | 0.905701 |
| 6984 | 10461547 | <a href="#">NM_181403</a>          | <a href="#">107305</a>    | vacuolar protein sorting 37C (    | <a href="#">Vps37c</a>             | 1.027 | 0.199  | 0.847616 | 0.938277 |
| 6985 | 10379445 | <a href="#">NM_011751</a>          | <a href="#">22680</a>     | zinc finger protein 207           | <a href="#">Zfp207</a>             | 1.027 | 0.761  | 0.470915 | 0.722763 |
| 6986 | 10457942 | <a href="#">NM_009308</a>          | <a href="#">20983</a>     | synaptotagmin IV                  | <a href="#">Syt4</a>               | 1.027 | 0.387  | 0.709993 | 0.873031 |
| 6987 | 10449955 | <a href="#">NM_130882</a>          | <a href="#">170716</a>    | cytochrome P450, family 4, sub    | <a href="#">Cyp4f13</a>            | 1.027 | 0.533  | 0.610221 | 0.818642 |
| 6988 | 10585905 | <a href="#">NM_029922</a>          | <a href="#">67287</a>     | poly (ADP-ribose) polymerase f    | <a href="#">Parp6</a>              | 1.027 | 0.765  | 0.468374 | 0.720616 |
| 6989 | 10425695 | <a href="#">NM_033218</a>          | <a href="#">20788</a>     | sterol regulatory element bind    | <a href="#">Srebf2</a>             | 1.027 | 0.133  | 0.897828 | 0.959787 |
| 6990 | 10401035 | <a href="#">NM_207707</a>          | <a href="#">13983</a>     | estrogen receptor 2 (beta)        | <a href="#">Esr2</a>               | 1.027 | 0.686  | 0.51421  | 0.754507 |
| 6991 | 10377431 | <a href="#">NM_009497</a>          | <a href="#">22318</a>     | vesicle-associated membrane pr    | <a href="#">Vamp2</a>              | 1.027 | 0.091  | 0.930041 | 0.972493 |
| 6992 | 10464128 | <a href="#">NM_007611</a>          | <a href="#">12369</a>     | caspase 7                         | <a href="#">Casp7</a>              | 1.027 | 0.234  | 0.821563 | 0.92863  |
| 6993 | 10470125 | <a href="#">ENSMUST00000064242</a> | <a href="#">545410</a>    | predicted gene,<br>OTTMUSG0000001 | <a href="#">OTTMUSG00000012511</a> | 1.027 | 1.487  | 0.179347 | 0.434671 |
| 6994 | 10588542 | <a href="#">BC125546</a>           | <a href="#">75470</a>     | IQ motif containing F5            | <a href="#">Iqcf5</a>              | 1.027 | 0.715  | 0.497385 | 0.741763 |
| 6995 | 10512489 | <a href="#">BC080700</a>           | <a href="#">230098</a>    | RIKEN cDNA E130306D19<br>gene     | <a href="#">E130306D19Rik</a>      | 1.027 | 0.481  | 0.644857 | 0.83943  |
| 6996 | 10522472 | <a href="#">NM_024183</a>          | <a href="#">66899</a>     | FIP1 like 1 (S. cerevisiae)       | <a href="#">Fip1l</a>              | 1.027 | 0.295  | 0.776365 | 0.908709 |
| 6997 | 10478647 | <a href="#">NM_020333</a>          | <a href="#">57138</a>     | solute carrier family 12, memb    | <a href="#">Slc12a5</a>            | 1.027 | 0.4    | 0.700606 | 0.86896  |
| 6998 | 10532407 | <a href="#">NM_029337</a>          | <a href="#">75560</a>     | E1A binding protein p400          | <a href="#">Ep400</a>              | 1.027 | 0.312  | 0.763592 | 0.901503 |
| 6999 | 10535389 | <a href="#">NM_080561</a>          | <a href="#">108086</a>    | ring finger protein 216           | <a href="#">Rnf216</a>             | 1.027 | 0.254  | 0.806722 | 0.921832 |
| 7000 | 10555116 | <a href="#">ENSMUST00000070021</a> | <a href="#">791341</a>    | predicted gene,<br>ENSMUSG0000005 | <a href="#">ENSMUSG00000056106</a> | 1.027 | 0.052  | 0.960067 | 0.985    |
| 7001 | 10405566 | <a href="#">BC107250</a>           | <a href="#">328258</a>    | expressed sequence AU042651       | <a href="#">AU042651</a>           | 1.027 | 0.806  | 0.445833 | 0.703765 |
| 7002 | 10600065 | <a href="#">NM_020280</a>          | <a href="#">17140</a>     | melanoma antigen, family A, 4     | <a href="#">Magea4</a>             | 1.027 | 0.356  | 0.731979 | 0.88455  |
| 7003 | 10463517 | <a href="#">NM_001081214</a>       | <a href="#">226169</a>    | peroxisome proliferative activ    | <a href="#">Pprc1</a>              | 1.027 | 0.219  | 0.832702 | 0.932699 |
| 7004 | 10586700 | <a href="#">NM_013646</a>          | <a href="#">19883</a>     | RAR-related orphan receptor al    | <a href="#">Rora</a>               | 1.027 | 0.133  | 0.897733 | 0.959787 |
| 7005 | 10391518 | <a href="#">NM_007863</a>          | <a href="#">13384</a>     | membrane protein, palmitoylate    | <a href="#">Mpp3</a>               | 1.027 | 0.718  | 0.495311 | 0.740179 |
| 7006 | 10405686 | <a href="#">BC134405</a>           | <a href="#">328264</a>    | predicted gene, EG328264          | <a href="#">EG328264</a>           | 1.027 | 0.351  | 0.735269 | 0.886784 |
| 7007 | 10371012 | <a href="#">NM_010722</a>          | <a href="#">16907</a>     | lamin B2                          | <a href="#">Lmnb2</a>              | 1.027 | 0.637  | 0.543628 | 0.775859 |
| 7008 | 10506893 | <a href="#">NM_146150</a>          | <a href="#">230598</a>    | nardilysin, N-arginine dibasic    | <a href="#">Nrd1</a>               | 1.027 | 0.41   | 0.693808 | 0.865705 |
| 7009 | 10449394 | <a href="#">NM_026836</a>          | <a href="#">68776</a>     | TAF11 RNA polymerase II,<br>TATA  | <a href="#">Taf11</a>              | 1.027 | -0.207 | 0.841511 | 0.935878 |
| 7010 | 10410136 | <a href="#">XR_004644</a>          | <a href="#">674402</a>    | similar to Peptidyl-prolyl cis    | <a href="#">LOC674402</a>          | 1.026 | -0.228 | 0.826111 | 0.929952 |
| 7011 | 10552966 | <a href="#">NM_008807</a>          | <a href="#">56734</a>     | tubby-like protein 2              | <a href="#">Tulp2</a>              | 1.026 | 0.382  | 0.713517 | 0.874653 |
| 7012 | 10386850 | <a href="#">NM_011308</a>          | <a href="#">20185</a>     | nuclear receptor co-repressor     | <a href="#">Ncor1</a>              | 1.026 | 0.779  | 0.460652 | 0.715179 |
| 7013 | 10572724 | <a href="#">NM_145624</a>          | <a href="#">236193</a>    | zinc finger protein 709           | <a href="#">Zfp709</a>             | 1.026 | 0.008  | 0.994193 | 0.997702 |
| 7014 | 10600082 | <a href="#">NM_010941</a>          | <a href="#">18194</a>     | NAD(P) dependent steroid dehyd    | <a href="#">Nsdhl</a>              | 1.026 | -0.586 | 0.57552  | 0.797076 |
| 7015 | 10371830 | <a href="#">NM_025914</a>          | <a href="#">67019</a>     | ARP6 actin-related protein 6 h    | <a href="#">Actr6</a>              | 1.026 | -0.056 | 0.956944 | 0.983559 |
| 7016 | 10551752 | <a href="#">ENSMUST00000098602</a> | <a href="#">114675</a>    | RIKEN cDNA 4932431P20 gene        | <a href="#">4932431P20Rik</a>      | 1.026 | 0.704  | 0.503669 | 0.746064 |
| 7017 | 10410351 | <a href="#">BC047145</a>           | <a href="#">380856</a>    | expressed sequence AA987161       | <a href="#">AA987161</a>           | 1.026 | -0.164 | 0.874587 | 0.949978 |
| 7018 | 10598837 |                                    |                           |                                   |                                    | 1.026 | 0.627  | 0.550034 | 0.78027  |
| 7019 | 10584252 | <a href="#">XM_994373</a>          | <a href="#">676959</a>    | similar to Urinary protein 1 p    | <a href="#">LOC676959</a>          | 1.026 | 0.57   | 0.585784 | 0.80308  |
| 7020 | 10474477 | <a href="#">XR_034254</a>          | <a href="#">623301</a>    | similar to LaXp180 protein        | <a href="#">LOC623301</a>          | 1.026 | 0.085  | 0.934229 | 0.97382  |
| 7021 | 10490706 | <a href="#">ENSMUST00000108789</a> | <a href="#">269401</a>    | zinc finger protein 512B          | <a href="#">Znf512b</a>            | 1.026 | -0.005 | 0.995993 | 0.998402 |
| 7022 | 10390484 | <a href="#">NM_026186</a>          | <a href="#">67480</a>     | coiled-coil domain containing     | <a href="#">Cede49</a>             | 1.026 | 0.358  | 0.730281 | 0.883456 |
| 7023 | 10493235 | <a href="#">NM_198410</a>          | <a href="#">68957</a>     | progesterone and adipoQ receptor  | <a href="#">Paqr6</a>              | 1.026 | 0.886  | 0.404005 | 0.668777 |
| 7024 | 10375926 | <a href="#">NM_019411</a>          | <a href="#">19052</a>     | protein phosphatase 2 (formerl    | <a href="#">Ppp2ca</a>             | 1.026 | 0.077  | 0.940864 | 0.977046 |
| 7025 | 10519138 | <a href="#">ENSMUST00000088499</a> | <a href="#">100038426</a> | predicted gene,<br>ENSMUSG0000007 | <a href="#">ENSMUSG00000073682</a> | 1.026 | 0.158  | 0.878935 | 0.952091 |
| 7026 | 10442258 | <a href="#">NM_001025373</a>       | <a href="#">74670</a>     | RIKEN cDNA 4930432O21<br>gene     | <a href="#">4930432O21Rik</a>      | 1.026 | -0.142 | 0.891189 | 0.957485 |
| 7027 | 10376507 | <a href="#">ENSMUST00000096104</a> | <a href="#">74476</a>     | RIKEN cDNA 4933439C10<br>gene     | <a href="#">4933439C10Rik</a>      | 1.026 | 0.095  | 0.926836 | 0.971063 |
| 7028 | 10437134 | <a href="#">NM_007890</a>          | <a href="#">13548</a>     | dual-specificity tyrosine-(Y)-    | <a href="#">Dyrk1a</a>             | 1.026 | 0.4    | 0.700929 | 0.868962 |
| 7029 | 10384456 |                                    |                           |                                   |                                    | 1.026 | 0.177  | 0.864022 | 0.945829 |
| 7030 | 10422298 | <a href="#">NM_122265</a>          | <a href="#">110992</a>    | domain associated with protein    | <a href="#">Dyrk1b</a>             | 1.026 | 0.475  | 0.648572 | 0.841032 |

|      |          |                                    |                           |                                |                                    |       |        |          |          |
|------|----------|------------------------------------|---------------------------|--------------------------------|------------------------------------|-------|--------|----------|----------|
| 7030 | 10423588 | <a href="#">NM_155302</a>          | <a href="#">110082</a>    | cynein, axonemal, neavy cnam   | <a href="#">Dnanc2</a>             | 1.020 | 0.473  | 0.048573 | 0.841922 |
| 7031 | 10592870 | <a href="#">NM_001033469</a>       | <a href="#">382074</a>    | forkhead box R1                | <a href="#">Foxr1</a>              | 1.026 | 0.247  | 0.811908 | 0.924032 |
| 7032 | 10409369 | <a href="#">NM_033610</a>          | <a href="#">104069</a>    | synuclein, beta                | <a href="#">Sncb</a>               | 1.026 | 0.427  | 0.681648 | 0.859335 |
| 7033 | 10474333 | <a href="#">AK140480</a>           | <a href="#">18508</a>     | paired box gene 6              | <a href="#">Pax6</a>               | 1.026 | -0.363 | 0.726866 | 0.881629 |
| 7034 | 10559853 | <a href="#">NM_011334</a>          | <a href="#">12727</a>     | chloride channel 4-2           | <a href="#">Clcn4-2</a>            | 1.026 | 0.449  | 0.666727 | 0.851355 |
| 7035 | 10501277 | <a href="#">NM_175470</a>          | <a href="#">229714</a>    | G protein-coupled receptor 61  | <a href="#">Gpr61</a>              | 1.026 | -0.149 | 0.885702 | 0.95523  |
| 7036 | 10386193 | <a href="#">ENSMUST00000081743</a> | <a href="#">258179</a>    | olfactory receptor 331         | <a href="#">Olfir331</a>           | 1.026 | 0.685  | 0.514983 | 0.754817 |
| 7037 | 10512301 | <a href="#">NM_001017362</a>       | <a href="#">550619</a>    | AT rich interactive domain 3C  | <a href="#">Arid3c</a>             | 1.026 | -0.273 | 0.792498 | 0.91549  |
| 7038 | 10582390 | <a href="#">NM_009698</a>          | <a href="#">11821</a>     | adenine phosphoribosyl transfe | <a href="#">Aprt</a>               | 1.026 | 0.18   | 0.86218  | 0.944751 |
| 7039 | 10435581 | <a href="#">NM_029977</a>          | <a href="#">77782</a>     | polymerase (DNA directed), the | <a href="#">Polq</a>               | 1.026 | 0.605  | 0.563934 | 0.79039  |
| 7040 | 10408610 | <a href="#">NM_009450</a>          | <a href="#">22151</a>     | tubulin, beta 2a               | <a href="#">Tubb2a</a>             | 1.026 | 0.436  | 0.675853 | 0.855911 |
| 7041 | 10552570 | <a href="#">NM_010640</a>          | <a href="#">16613</a>     | kallikrein 1-related peptidase | <a href="#">Klk1b11</a>            | 1.026 | 0.448  | 0.666983 | 0.851389 |
| 7042 | 10567335 | <a href="#">NM_019580</a>          | <a href="#">56209</a>     | glycerophosphodiester phosphod | <a href="#">Gde1</a>               | 1.026 | -0.285 | 0.783939 | 0.912068 |
| 7043 | 10369210 | <a href="#">NM_019760</a>          | <a href="#">56442</a>     | serine incorporator 1          | <a href="#">Serine1</a>            | 1.026 | 0.28   | 0.787345 | 0.913152 |
| 7044 | 10376603 | <a href="#">NM_021354</a>          | <a href="#">13495</a>     | developmentally regulated GTP  | <a href="#">Drg2</a>               | 1.026 | -0.429 | 0.680621 | 0.85838  |
| 7045 | 10409464 | <a href="#">NM_019813</a>          | <a href="#">56320</a>     | drebrin 1                      | <a href="#">Dbn1</a>               | 1.026 | 0.377  | 0.71729  | 0.876366 |
| 7046 | 10505356 | <a href="#">ENSMUST00000107415</a> | <a href="#">72701</a>     | zinc fingerprotein 618         | <a href="#">Zfp618</a>             | 1.026 | 0.25   | 0.809451 | 0.923176 |
| 7047 | 10450038 | <a href="#">NM_020581</a>          | <a href="#">57875</a>     | angiopoietin-like 4            | <a href="#">Angptl4</a>            | 1.026 | 1.187  | 0.272958 | 0.547572 |
| 7048 | 10550424 | <a href="#">NM_054064</a>          | <a href="#">114872</a>    | pregnancy-specific glycoprotei | <a href="#">Psg29</a>              | 1.026 | 0.592  | 0.571878 | 0.795983 |
| 7049 | 10437180 | <a href="#">NM_015825</a>          | <a href="#">50795</a>     | SH3-binding domain glutamic ac | <a href="#">Sh3bgr</a>             | 1.026 | 0.68   | 0.517865 | 0.756834 |
| 7050 | 10479270 | <a href="#">ENSMUST00000041998</a> | <a href="#">68175</a>     | RIKEN cDNA 4930591A17 gene     | <a href="#">4930591A17Rik</a>      | 1.026 | 0.504  | 0.629296 | 0.831256 |
| 7051 | 10387295 | <a href="#">NM_172560</a>          | <a href="#">216846</a>    | centrobin, centrosomal BRCA2 i | <a href="#">Cntrob</a>             | 1.026 | 0.613  | 0.558849 | 0.786425 |
| 7052 | 10423654 | <a href="#">NM_054049</a>          | <a href="#">107587</a>    | odd-skipped related 2 (Drosoph | <a href="#">Osr2</a>               | 1.026 | 0.554  | 0.596437 | 0.809856 |
| 7053 | 10394448 | <a href="#">NM_030723</a>          | <a href="#">80913</a>     | pumilio 2 (Drosophila)         | <a href="#">Pum2</a>               | 1.026 | 0.455  | 0.662739 | 0.849837 |
| 7054 | 10381514 | <a href="#">NM_027987</a>          | <a href="#">52685</a>     | CD300 antigen like family memb | <a href="#">Cd300lg</a>            | 1.026 | 0.753  | 0.475141 | 0.726714 |
| 7055 | 10539295 | <a href="#">NM_033606</a>          | <a href="#">93838</a>     | DEAQ RNA-dependent ATPase      | <a href="#">Dqx1</a>               | 1.026 | 0.836  | 0.430046 | 0.690844 |
| 7056 | 10453276 | <a href="#">EK223207</a>           | <a href="#">240174</a>    | thyroid adenoma-associated     | <a href="#">Thada</a>              | 1.026 | 0.185  | 0.858482 | 0.947242 |
| 7057 | 10523925 | <a href="#">NM_028481</a>          | <a href="#">72954</a>     | coiled-coil domain containing  | <a href="#">Ccc18g</a>             | 1.026 | 0.073  | 0.941936 | 0.977644 |
| 7058 | 10459785 | <a href="#">NM_201354</a>          | <a href="#">269037</a>    | gene model 672, (NCBI)         | <a href="#">Gm672</a>              | 1.026 | 0.653  | 0.533873 | 0.767853 |
| 7059 | 10439915 |                                    |                           |                                |                                    | 1.026 | 0.281  | 0.786811 | 0.91293  |
| 7060 | 10421026 | <a href="#">ENSMUST00000100447</a> | <a href="#">100038671</a> | predicted gene, ENSMUSG0000007 | <a href="#">ENSMUSG00000075548</a> | 1.026 | 0.493  | 0.636437 | 0.834887 |
| 7061 | 10570448 | <a href="#">ENSMUST00000098916</a> | <a href="#">100038645</a> | predicted gene, ENSMUSG0000007 | <a href="#">ENSMUSG00000074461</a> | 1.025 | 0.016  | 0.98784  | 0.994998 |
| 7062 | 10603208 | <a href="#">NM_010797</a>          | <a href="#">17318</a>     | midline 1                      | <a href="#">Mid1</a>               | 1.025 | 0.744  | 0.480328 | 0.729941 |
| 7063 | 10417689 | <a href="#">NM_025550</a>          | <a href="#">66413</a>     | proteasome (prosome, macropain | <a href="#">Psm6</a>               | 1.025 | 0.02   | 0.984392 | 0.993413 |
| 7064 | 10552270 | <a href="#">NM_001004139</a>       | <a href="#">70227</a>     | zinc finger protein 619        | <a href="#">Zfp619</a>             | 1.025 | -0.232 | 0.823214 | 0.929358 |
| 7065 | 10433034 | <a href="#">NM_146065</a>          | <a href="#">223922</a>    | activating transcription facto | <a href="#">Atf7</a>               | 1.025 | 0.822  | 0.43739  | 0.696704 |
| 7066 | 10601922 |                                    |                           |                                |                                    | 1.025 | 0.515  | 0.621981 | 0.826961 |
| 7067 | 10346592 | <a href="#">AK144579</a>           | <a href="#">100038354</a> | predicted gene, ENSMUSG0000007 | <a href="#">ENSMUSG00000073665</a> | 1.025 | 0.66   | 0.529524 | 0.764772 |
| 7068 | 10347807 | <a href="#">NM_007734</a>          | <a href="#">12828</a>     | collagen, type IV, alpha 3     | <a href="#">Col4a3</a>             | 1.025 | 0.748  | 0.478043 | 0.728592 |
| 7069 | 10537441 | <a href="#">NM_178873</a>          | <a href="#">57869</a>     | aarF domain containing kinase  | <a href="#">Adck2</a>              | 1.025 | 0.272  | 0.793417 | 0.915898 |
| 7070 | 10596070 |                                    |                           |                                |                                    | 1.025 | 0.106  | 0.91873  | 0.967805 |
| 7071 | 10411949 | <a href="#">NM_029879</a>          | <a href="#">52882</a>     | regulator of G-protein signall | <a href="#">Rgs7bp</a>             | 1.025 | 1.032  | 0.335246 | 0.610757 |
| 7072 | 10412913 | <a href="#">XR_033495</a>          | <a href="#">667344</a>    | similar to Speer4e protein     | <a href="#">LOC667344</a>          | 1.025 | 0.745  | 0.480115 | 0.729941 |
| 7073 | 10400326 | <a href="#">NM_025456</a>          | <a href="#">66266</a>     | E2F-associated phosphoprotein  | <a href="#">Eapp</a>               | 1.025 | -0.184 | 0.858943 | 0.943374 |
| 7074 | 10444386 | <a href="#">NM_134116</a>          | <a href="#">106512</a>    | G-protein signalling modulator | <a href="#">Gpsm3</a>              | 1.025 | 0.446  | 0.66846  | 0.852263 |
| 7075 | 10416488 | <a href="#">ENSMUST00000022579</a> | <a href="#">75272</a>     | RIKEN cDNA 4930564B18 gene     | <a href="#">4930564B18Rik</a>      | 1.025 | 0.338  | 0.7451   | 0.891615 |
| 7076 | 10467006 | <a href="#">NM_010051</a>          | <a href="#">13380</a>     | dickkopf homolog 1 (Xenopus la | <a href="#">Dkk1</a>               | 1.025 | 0.327  | 0.752855 | 0.89585  |
| 7077 | 10529758 | <a href="#">NM_001081422</a>       | <a href="#">665775</a>    | RIKEN cDNA A230054D04 gene     | <a href="#">A230054D04Rik</a>      | 1.025 | 0.25   | 0.809495 | 0.923176 |
| 7078 | 10463695 | <a href="#">BC027506</a>           | <a href="#">66439</a>     | RIKEN cDNA 2010012005 gene     | <a href="#">2010012005Rik</a>      | 1.025 | 0.173  | 0.867699 | 0.947039 |
| 7079 | 10404055 | <a href="#">NM_010377</a>          | <a href="#">107970</a>    | histone cluster 1, H1t         | <a href="#">Hist1h1t</a>           | 1.025 | 0.679  | 0.518306 | 0.756954 |
| 7080 | 10461671 | <a href="#">NM_172635</a>          | <a href="#">225929</a>    | protein associated with topois | <a href="#">Pat11</a>              | 1.025 | 0.168  | 0.871217 | 0.948575 |

|      |          |                                    |                           |                                       |                                     |       |        |          |          |
|------|----------|------------------------------------|---------------------------|---------------------------------------|-------------------------------------|-------|--------|----------|----------|
| 7081 | 10498053 | <a href="#">NM_026358</a>          | <a href="#">67749</a>     | RIKEN cDNA 4930583H14 gene            | <a href="#">4930583H14Rik</a>       | 1.025 | 0.414  | 0.690683 | 0.864369 |
| 7082 | 10554839 | <a href="#">NM_146194</a>          | <a href="#">233489</a>    | phosphatidylinositol binding c        | <a href="#">Picalm</a>              | 1.025 | 0.322  | 0.756417 | 0.897871 |
| 7083 | 10512165 | <a href="#">NM_139236</a>          | <a href="#">230082</a>    | nucleolar protein family 6 (RN        | <a href="#">Nol6</a>                | 1.025 | 0.672  | 0.522424 | 0.759283 |
| 7084 | 10392699 | <a href="#">ENSMUST00000100254</a> | <a href="#">100038732</a> | predicted gene,<br>OTTMUSG0000000     | <a href="#">OTTMUSG00000003311</a>  | 1.025 | 0.886  | 0.404348 | 0.668978 |
| 7085 | 10541188 |                                    |                           |                                       |                                     | 1.025 | 0.661  | 0.528862 | 0.764129 |
| 7086 | 10605571 | <a href="#">NM_212444</a>          | <a href="#">14933</a>     | glycerol kinase                       | <a href="#">Gyk</a>                 | 1.025 | 0.582  | 0.578211 | 0.79826  |
| 7087 | 10549820 | <a href="#">NM_178028</a>          | <a href="#">232836</a>    | galanin-like peptide                  | <a href="#">Galp</a>                | 1.025 | 0.662  | 0.528804 | 0.764097 |
| 7088 | 10572461 | <a href="#">ENSMUST00000116458</a> | <a href="#">637079</a>    | RIKEN cDNA 2410018E23 gene            | <a href="#">2410018E23Rik</a>       | 1.025 | 0.613  | 0.558668 | 0.786292 |
| 7089 | 10457862 | <a href="#">NM_144861</a>          | <a href="#">225283</a>    | cDNA sequence BC021395                | <a href="#">BC021395</a>            | 1.025 | 0.177  | 0.864628 | 0.946153 |
| 7090 | 10555414 | <a href="#">NM_024287</a>          | <a href="#">19346</a>     | RAB6, member RAS oncogene fami        | <a href="#">Rab6</a>                | 1.025 | 0.503  | 0.629885 | 0.831325 |
| 7091 | 10424119 | <a href="#">NM_010930</a>          | <a href="#">18133</a>     | nephroblastoma overexpressed g        | <a href="#">Nov</a>                 | 1.025 | 0.46   | 0.659373 | 0.848209 |
| 7092 | 10571784 |                                    |                           |                                       |                                     | 1.025 | 0.574  | 0.583517 | 0.801489 |
| 7093 | 10539364 | <a href="#">NM_007835</a>          | <a href="#">13191</a>     | dynactin 1                            | <a href="#">Dctn1</a>               | 1.025 | -0.078 | 0.940161 | 0.9767   |
| 7094 | 10499265 | <a href="#">NM_033573</a>          | <a href="#">94315</a>     | papillary renal cell carcinoma        | <a href="#">Prc</a>                 | 1.025 | 0.138  | 0.89378  | 0.958124 |
| 7095 | 10481909 | <a href="#">NM_013890</a>          | <a href="#">30050</a>     | F-box and WD-40 domain protein        | <a href="#">Fbxw2</a>               | 1.025 | 0.426  | 0.682203 | 0.859614 |
| 7096 | 10507112 | <a href="#">NM_009185</a>          | <a href="#">20460</a>     | Scf/Tal1 interrupting locus           | <a href="#">Stil</a>                | 1.025 | -0.22  | 0.831595 | 0.932402 |
| 7097 | 10586194 | <a href="#">NM_172522</a>          | <a href="#">214058</a>    | multiple EGF-like-domains 11          | <a href="#">Megf11</a>              | 1.025 | 0.787  | 0.456087 | 0.712435 |
| 7098 | 10385616 | <a href="#">NM_172557</a>          | <a href="#">216724</a>    | RUN and FYVE domain containing        | <a href="#">Rufy1</a>               | 1.025 | 0.38   | 0.715217 | 0.875355 |
| 7099 | 10432573 | <a href="#">NM_008732</a>          | <a href="#">18174</a>     | solute carrier family 11 (prot        | <a href="#">Slc11a2</a>             | 1.025 | 0.394  | 0.705297 | 0.871482 |
| 7100 | 10574641 | <a href="#">NM_145604</a>          | <a href="#">234678</a>    | RIKEN cDNA D230025D16 gene            | <a href="#">D230025D16Rik</a>       | 1.025 | -0.288 | 0.781335 | 0.911076 |
| 7101 | 10463661 | <a href="#">NM_053100</a>          | <a href="#">93679</a>     | tripartite motif protein 8            | <a href="#">Trim8</a>               | 1.025 | 0.049  | 0.962568 | 0.985405 |
| 7102 | 10462140 | <a href="#">NM_028785</a>          | <a href="#">76088</a>     | dedicator of cytokinesis 8            | <a href="#">Dock8</a>               | 1.025 | 0.166  | 0.872832 | 0.949165 |
| 7103 | 10535608 | <a href="#">NM_001013774</a>       | <a href="#">381686</a>    | expressed sequence AW146299           | <a href="#">AW146299</a>            | 1.025 | 0.379  | 0.715459 | 0.875402 |
| 7104 | 10380830 | <a href="#">NM_001080935</a>       | <a href="#">68127</a>     | RIKEN cDNA B230217C12 gene            | <a href="#">B230217C12Rik</a>       | 1.025 | 0.386  | 0.710876 | 0.873183 |
| 7105 | 10420503 | <a href="#">NM_001081024</a>       | <a href="#">239122</a>    | SET domain, bifurcated 2              | <a href="#">Setdb2</a>              | 1.025 | -0.164 | 0.874364 | 0.949978 |
| 7106 | 10383409 | <a href="#">NM_008101</a>          | <a href="#">14527</a>     | glucagon receptor                     | <a href="#">Gcgr</a>                | 1.025 | 0.39   | 0.707642 | 0.872268 |
| 7107 | 10568243 | <a href="#">NM_146203</a>          | <a href="#">233893</a>    | zinc finger protein 764               | <a href="#">Zfp764</a>              | 1.025 | 0.299  | 0.773623 | 0.9067   |
| 7108 | 10370025 | <a href="#">NM_011418</a>          | <a href="#">20587</a>     | SWI/SNF related, matrix associ        | <a href="#">Smarb1</a>              | 1.025 | -0.162 | 0.875979 | 0.95093  |
| 7109 | 10493409 | <a href="#">NM_011886</a>          | <a href="#">24045</a>     | secretory carrier membrane pro        | <a href="#">Scamp3</a>              | 1.025 | -0.014 | 0.98944  | 0.995361 |
| 7110 | 10481518 | <a href="#">NM_022415</a>          | <a href="#">64292</a>     | prostaglandin E synthase              | <a href="#">Ptges</a>               | 1.025 | 0.486  | 0.64133  | 0.837465 |
| 7111 | 10469828 | <a href="#">NM_177611</a>          | <a href="#">215632</a>    | pleckstrin and Sec7 domain con        | <a href="#">Psd4</a>                | 1.025 | 0.831  | 0.432782 | 0.693239 |
| 7112 | 10361787 |                                    |                           |                                       |                                     | 1.025 | 0.497  | 0.633967 | 0.833567 |
| 7113 | 10430066 | <a href="#">NM_007989</a>          | <a href="#">14106</a>     | forkhead box H1                       | <a href="#">Foxh1</a>               | 1.025 | 0.661  | 0.529126 | 0.76441  |
| 7114 | 10457407 |                                    |                           |                                       |                                     | 1.025 | 0.838  | 0.428741 | 0.689638 |
| 7115 | 10449386 | <a href="#">NM_001033279</a>       | <a href="#">224647</a>    | DNA segment, Chr 17, Wayne Sta        | <a href="#">D17Wsu92e</a>           | 1.025 | -0.11  | 0.915507 | 0.966659 |
| 7116 | 10465072 | <a href="#">NM_027877</a>          | <a href="#">71711</a>     | MUS81 endonuclease homolog (ye        | <a href="#">Mus81</a>               | 1.025 | 0.272  | 0.792916 | 0.915604 |
| 7117 | 10603659 | <a href="#">NM_001048208</a>       | <a href="#">26896</a>     | mediator complex subunit 14           | <a href="#">Med14</a>               | 1.025 | 0.458  | 0.660728 | 0.848802 |
| 7118 | 10397346 | <a href="#">NM_010234</a>          | <a href="#">14281</a>     | FBJ osteosarcoma oncogene             | <a href="#">Fos</a>                 | 1.025 | 0.494  | 0.636001 | 0.834684 |
| 7119 | 10379968 | <a href="#">NM_019756</a>          | <a href="#">56427</a>     | tubulin, delta 1                      | <a href="#">Tubd1</a>               | 1.025 | 0.373  | 0.720164 | 0.878163 |
| 7120 | 10375735 | <a href="#">NM_021510</a>          | <a href="#">59013</a>     | heterogeneous nuclear ribonucl        | <a href="#">Hnrph1</a>              | 1.025 | 0.386  | 0.710523 | 0.873041 |
| 7121 | 10379840 | <a href="#">BC007156</a>           | <a href="#">66196</a>     | myosin XIX                            | <a href="#">Myo19</a>               | 1.025 | 0.643  | 0.540334 | 0.772836 |
| 7122 | 10362394 | <a href="#">NM_027168</a>          | <a href="#">69692</a>     | HD domain containing 2                | <a href="#">Hdcd2</a>               | 1.025 | -0.322 | 0.756612 | 0.897871 |
| 7123 | 10566743 | <a href="#">NM_181853</a>          | <a href="#">330627</a>    | tripartite motif-containing 66        | <a href="#">Trim66</a>              | 1.025 | 0.914  | 0.390463 | 0.659    |
| 7124 | 10429524 | <a href="#">BC055822</a>           | <a href="#">78725</a>     | RIKEN cDNA D730001G18 gene            | <a href="#">D730001G18Rik</a>       | 1.025 | 0.729  | 0.488999 | 0.736349 |
| 7125 | 10509014 | <a href="#">BC043057</a>           | <a href="#">27981</a>     | DNA segment, Chr 4, Wayne Stat        | <a href="#">D4Wsu53e</a>            | 1.024 | 0.646  | 0.538084 | 0.771077 |
| 7126 | 10488472 | <a href="#">ENSMUST00000046399</a> | <a href="#">71881</a>     | RIKEN cDNA 2310001A20 gene            | <a href="#">2310001A20Rik</a>       | 1.024 | 0.215  | 0.835831 | 0.933525 |
| 7127 | 10514556 | <a href="#">AK132939</a>           | <a href="#">100038661</a> | predicted gene,<br>ENSMUST00000000000 | <a href="#">ENSMUSG000000066990</a> | 1.024 | 0.666  | 0.526291 | 0.762289 |

|      |          |                                    |                           | ENSMUSG000000                  |                                    |       |        |          |          |  |
|------|----------|------------------------------------|---------------------------|--------------------------------|------------------------------------|-------|--------|----------|----------|--|
| 7128 | 10547034 | <a href="#">NM_029780</a>          | <a href="#">110157</a>    | v-raf-leukemia viral oncogene  | <a href="#">Raf1</a>               | 1.024 | 0.659  | 0.530346 | 0.765382 |  |
| 7129 | 10394699 | <a href="#">NM_009072</a>          | <a href="#">19878</a>     | Rho-associated coiled-coil con | <a href="#">Rock2</a>              | 1.024 | 0.056  | 0.957012 | 0.983559 |  |
| 7130 | 10516466 | <a href="#">NM_026670</a>          | <a href="#">68310</a>     | zinc finger, MYM domain contai | <a href="#">Zmyml1</a>             | 1.024 | 0.213  | 0.837392 | 0.934421 |  |
| 7131 | 10496956 | <a href="#">NM_178016</a>          | <a href="#">329777</a>    | phosphatidylinositol glycan an | <a href="#">Pigk</a>               | 1.024 | -0.253 | 0.807231 | 0.922301 |  |
| 7132 | 10362186 | <a href="#">NM_021509</a>          | <a href="#">59012</a>     | monooxygenase, DBH-like 1      | <a href="#">Moxd1</a>              | 1.024 | -0.482 | 0.644029 | 0.838972 |  |
| 7133 | 10432429 |                                    |                           |                                |                                    | 1.024 | 0.388  | 0.709126 | 0.872707 |  |
| 7134 | 10562911 | <a href="#">NM_001042655</a>       | <a href="#">233204</a>    | TBC1 domain family, member 17  | <a href="#">Tbc1d17</a>            | 1.024 | 0.146  | 0.888089 | 0.955903 |  |
| 7135 | 10519203 | <a href="#">NM_001033394</a>       | <a href="#">320587</a>    | RIKEN cDNA A230069A22 gene     | <a href="#">A230069A22Rik</a>      | 1.024 | 0.301  | 0.771798 | 0.90585  |  |
| 7136 | 10532999 | <a href="#">ENSMUST00000112066</a> | <a href="#">75387</a>     | sirtuin 4 (silent mating type  | <a href="#">Sirt4</a>              | 1.024 | 0.077  | 0.941039 | 0.97709  |  |
| 7137 | 10483665 |                                    |                           |                                |                                    | 1.024 | 0.45   | 0.665642 | 0.850998 |  |
| 7138 | 10421694 |                                    |                           |                                |                                    | 1.024 | 0.457  | 0.661421 | 0.849228 |  |
| 7139 | 10564857 | <a href="#">NM_173011</a>          | <a href="#">269951</a>    | isocitrate dehydrogenase 2 (NA | <a href="#">Idh2</a>               | 1.024 | 0.264  | 0.799387 | 0.919009 |  |
| 7140 | 10589938 | <a href="#">ENSMUST00000098321</a> | <a href="#">100038368</a> | predicted gene, ENSMUSG0000007 | <a href="#">ENSMUSG00000074035</a> | 1.024 | 0.219  | 0.832592 | 0.932679 |  |
| 7141 | 10504562 | <a href="#">AK016397</a>           | <a href="#">66362</a>     | exosome component 3            | <a href="#">Exosc3</a>             | 1.024 | 0.191  | 0.853959 | 0.940913 |  |
| 7142 | 10566302 | <a href="#">NM_207144</a>          | <a href="#">258247</a>    | olfactory receptor 645         | <a href="#">Olfr645</a>            | 1.024 | 0.456  | 0.661943 | 0.84942  |  |
| 7143 | 10572693 | <a href="#">NM_013564</a>          | <a href="#">16336</a>     | insulin-like 3                 | <a href="#">Ins3</a>               | 1.024 | 0.41   | 0.693855 | 0.865705 |  |
| 7144 | 10476880 | <a href="#">XR_034866</a>          | <a href="#">381384</a>    | RIKEN cDNA A530006G24 gene     | <a href="#">A530006G24Rik</a>      | 1.024 | 0.333  | 0.748846 | 0.893695 |  |
| 7145 | 10434932 | <a href="#">BC099947</a>           | <a href="#">224093</a>    | cDNA sequence BC022623         | <a href="#">BC022623</a>           | 1.024 | 0.276  | 0.790144 | 0.914502 |  |
| 7146 | 10572745 | <a href="#">NM_146338</a>          | <a href="#">258335</a>    | olfactory receptor 374         | <a href="#">Olfr374</a>            | 1.024 | 0.578  | 0.58056  | 0.799564 |  |
| 7147 | 10420359 | <a href="#">NM_016975</a>          | <a href="#">14611</a>     | gap junction protein, alpha 3  | <a href="#">Gja3</a>               | 1.024 | 0.871  | 0.41173  | 0.675587 |  |
| 7148 | 10406248 |                                    |                           |                                |                                    | 1.024 | 0.995  | 0.352087 | 0.625224 |  |
| 7149 | 10533644 | <a href="#">NM_029929</a>          | <a href="#">77573</a>     | vacuolar protein sorting 33A ( | <a href="#">Vps33a</a>             | 1.024 | 0.425  | 0.683252 | 0.859827 |  |
| 7150 | 10426544 | <a href="#">BC022913</a>           | <a href="#">67739</a>     | RIKEN cDNA 4930570C03 gene     | <a href="#">4930570C03Rik</a>      | 1.024 | -0.156 | 0.880045 | 0.952396 |  |
| 7151 | 10375499 |                                    |                           |                                |                                    | 1.024 | 0.072  | 0.944369 | 0.977948 |  |
| 7152 | 10441400 | <a href="#">NM_001085355</a>       | <a href="#">239985</a>    | AT rich interactive domain 1B  | <a href="#">Arid1b</a>             | 1.024 | 0.252  | 0.80812  | 0.922738 |  |
| 7153 | 10403258 | <a href="#">NM_008112</a>          | <a href="#">14569</a>     | guanosine diphosphate (GDP) di | <a href="#">Gdi2</a>               | 1.024 | 0.135  | 0.896237 | 0.95935  |  |
| 7154 | 10463043 | <a href="#">NM_010001</a>          | <a href="#">13096</a>     | cytochrome P450, family 2, sub | <a href="#">Cyp2c37</a>            | 1.024 | 0.098  | 0.924758 | 0.970324 |  |
| 7155 | 10569393 | <a href="#">ENSMUST00000072468</a> | <a href="#">97423</a>     | expressed sequence R74862      | <a href="#">R74862</a>             | 1.024 | 0.089  | 0.931635 | 0.972759 |  |
| 7156 | 10551741 | <a href="#">NM_013874</a>          | <a href="#">29861</a>     | D4, zinc and double PHD finger | <a href="#">Dpf1</a>               | 1.024 | -0.031 | 0.976329 | 0.990137 |  |
| 7157 | 10365518 | <a href="#">NM_175331</a>          | <a href="#">103466</a>    | 5'-nucleotidase domain contain | <a href="#">Nt5dc3</a>             | 1.024 | 0.054  | 0.958522 | 0.984334 |  |
| 7158 | 10451198 | <a href="#">NM_001025250</a>       | <a href="#">22339</a>     | vascular endothelial growth fa | <a href="#">Vegfa</a>              | 1.024 | 0.183  | 0.859925 | 0.943624 |  |
| 7159 | 10493633 | <a href="#">NM_022314</a>          | <a href="#">59069</a>     | tropomyosin 3, gamma           | <a href="#">Tpm3</a>               | 1.024 | 0.234  | 0.821761 | 0.92863  |  |
| 7160 | 10349453 | <a href="#">NM_178690</a>          | <a href="#">226407</a>    | RAB3 GTPase activating protein | <a href="#">Rab3gap1</a>           | 1.024 | 0.32   | 0.758348 | 0.898716 |  |
| 7161 | 10599243 | <a href="#">NM_153503</a>          | <a href="#">69942</a>     | ring finger protein 113A1      | <a href="#">Rnf113a1</a>           | 1.024 | -0.172 | 0.868192 | 0.947187 |  |
| 7162 | 10442762 | <a href="#">NM_178372</a>          | <a href="#">328780</a>    | protease, serine, 34           | <a href="#">Prss34</a>             | 1.024 | 0.266  | 0.797689 | 0.917953 |  |
| 7163 | 10436828 | <a href="#">NM_016968</a>          | <a href="#">50914</a>     | oligodendrocyte transcription  | <a href="#">Olig1</a>              | 1.024 | 0.136  | 0.895443 | 0.958936 |  |
| 7164 | 10474807 | <a href="#">ENSMUST00000099551</a> | <a href="#">100043272</a> | similar to F32B6.11            | <a href="#">LOC100043272</a>       | 1.024 | 0.252  | 0.808103 | 0.922738 |  |
| 7165 | 10364810 | <a href="#">NM_139226</a>          | <a href="#">246086</a>    | one cut domain, family member  | <a href="#">Onecut3</a>            | 1.024 | 0.476  | 0.64812  | 0.84176  |  |
| 7166 | 10560908 | <a href="#">ENSMUST00000116343</a> | <a href="#">232974</a>    | predicted gene, EG232974       | <a href="#">EG232974</a>           | 1.024 | 0.321  | 0.757083 | 0.898052 |  |
| 7167 | 10442311 | <a href="#">NM_153784</a>          | <a href="#">212733</a>    | coiled-coil domain containing  | <a href="#">Ccdc64b</a>            | 1.024 | 0.63   | 0.548316 | 0.77872  |  |
| 7168 | 10605324 | <a href="#">NM_145406</a>          | <a href="#">214601</a>    | solute carrier family 10 (sodi | <a href="#">Slc10a3</a>            | 1.024 | 0.619  | 0.554857 | 0.783816 |  |
| 7169 | 10539321 | <a href="#">NM_001081266</a>       | <a href="#">243510</a>    | coiled-coil domain containing  | <a href="#">Ccdc142</a>            | 1.024 | -0.014 | 0.988937 | 0.995308 |  |
| 7170 | 10605659 |                                    |                           |                                |                                    | 1.024 | 0.087  | 0.932688 | 0.973153 |  |
| 7171 | 10466441 | <a href="#">NM_173028</a>          | <a href="#">271564</a>    | vacuolar protein sorting 13A ( | <a href="#">Vps13a</a>             | 1.024 | 0.504  | 0.629618 | 0.831325 |  |
| 7172 | 10448262 | <a href="#">NM_001033496</a>       | <a href="#">449521</a>    | zinc finger protein 213        | <a href="#">Zfp213</a>             | 1.024 | 0.695  | 0.508861 | 0.750513 |  |
| 7173 | 10540480 | <a href="#">NM_026011</a>          | <a href="#">67166</a>     | ADP-ribosylation factor-like 8 | <a href="#">Arl8b</a>              | 1.024 | 0.03   | 0.976955 | 0.990541 |  |
| 7174 | 10543522 | <a href="#">XR_032572</a>          | <a href="#">384360</a>    | hypothetical gene supported by | <a href="#">LOC384360</a>          | 1.024 | 0.238  | 0.818593 | 0.927912 |  |
| 7175 | 10568202 | <a href="#">NM_017461</a>          | <a href="#">54204</a>     | septin 1                       | <a href="#">Sept1</a>              | 1.023 | 0.621  | 0.553543 | 0.783151 |  |
| 7176 | 10400460 | <a href="#">NM_145442</a>          | <a href="#">217588</a>    | MAP3K12 binding inhibitory pro | <a href="#">Mbip</a>               | 1.023 | 0.138  | 0.89383  | 0.958124 |  |
| 7177 | 10504703 | <a href="#">NM_001033201</a>       | <a href="#">433702</a>    | expressed sequence AU014645    | <a href="#">AU014645</a>           | 1.023 | 0.335  | 0.747469 | 0.892656 |  |
| 7178 | 10362389 |                                    |                           |                                |                                    | 1.023 | -0.002 | 0.998828 | 0.999589 |  |
| 7179 | 10570608 | <a href="#">NM_020610</a>          | <a href="#">73307</a>     | UDP-GlcNAc:betaGal beta-1.3-   | <a href="#">Nac1</a>               | 1.023 | 0.816  | 0.807156 | 0.801034 |  |

|      |          |                                    |                           |                                |                                    |       |        |          |          |
|------|----------|------------------------------------|---------------------------|--------------------------------|------------------------------------|-------|--------|----------|----------|
| 7179 | 10579607 | <a href="#">BC026418</a>           | <a href="#">12297</a>     | N-                             | <a href="#">B3gnt5</a>             | 1.023 | -0.016 | 0.987456 | 0.994834 |
| 7180 | 10369779 | <a href="#">NM_001005419</a>       | <a href="#">211488</a>    | 2-aminoethanethiol (cysteamine | <a href="#">Ado</a>                | 1.023 | 0.056  | 0.956575 | 0.983555 |
| 7181 | 10592079 | <a href="#">ENSMUST00000066604</a> | <a href="#">442804</a>    | RIKEN cDNA A130066N16 gene     | <a href="#">A130066N16Rik</a>      | 1.023 | 0.521  | 0.618292 | 0.823818 |
| 7182 | 10584165 | <a href="#">NM_026324</a>          | <a href="#">67703</a>     | kin of IRRE like 3 (Drosophila | <a href="#">Kirrel3</a>            | 1.023 | 0.724  | 0.491787 | 0.738245 |
| 7183 | 10553450 | <a href="#">NM_001037906</a>       | <a href="#">338352</a>    | NEL-like 1 (chicken)           | <a href="#">Nell1</a>              | 1.023 | 0.304  | 0.769907 | 0.904792 |
| 7184 | 10558057 | <a href="#">NM_172255</a>          | <a href="#">207425</a>    | bromodomain and WD repeat doma | <a href="#">Brwd2</a>              | 1.023 | 0.189  | 0.855458 | 0.941478 |
| 7185 | 10397741 | <a href="#">NM_008947</a>          | <a href="#">19179</a>     | protease (prosome, macropain)  | <a href="#">Psmc1</a>              | 1.023 | -0.147 | 0.887138 | 0.955613 |
| 7186 | 10372096 |                                    |                           |                                |                                    | 1.023 | 0.856  | 0.419731 | 0.682047 |
| 7187 | 10504692 | <a href="#">NM_021883</a>          | <a href="#">21916</a>     | tropomodulin 1                 | <a href="#">Timod1</a>             | 1.023 | -0.037 | 0.971677 | 0.988148 |
| 7188 | 10582146 | <a href="#">NM_025734</a>          | <a href="#">66733</a>     | potassium voltage-gated channe | <a href="#">Kcng4</a>              | 1.023 | 0.212  | 0.838131 | 0.934421 |
| 7189 | 10377588 | <a href="#">NM_009235</a>          | <a href="#">20670</a>     | SRY-box containing gene 15     | <a href="#">Sox15</a>              | 1.023 | 0.259  | 0.80262  | 0.919965 |
| 7190 | 10389561 | <a href="#">NM_026191</a>          | <a href="#">67487</a>     | DEAH (Asp-Glu-Ala-His) box pol | <a href="#">Dhx40</a>              | 1.023 | -0.525 | 0.615616 | 0.822286 |
| 7191 | 10591517 | <a href="#">NM_009878</a>          | <a href="#">12581</a>     | cyclin-dependent kinase inhibi | <a href="#">Cdkn2d</a>             | 1.023 | -0.046 | 0.96428  | 0.9859   |
| 7192 | 10508074 | <a href="#">NM_007782</a>          | <a href="#">12986</a>     | colony stimulating factor 3 re | <a href="#">Csf3r</a>              | 1.023 | 0.727  | 0.490017 | 0.737262 |
| 7193 | 10421853 | <a href="#">NM_010701</a>          | <a href="#">16840</a>     | leukocyte cell derived chemota | <a href="#">Lect1</a>              | 1.023 | -0.106 | 0.918239 | 0.967805 |
| 7194 | 10516046 |                                    |                           |                                |                                    | 1.023 | 1.15   | 0.286961 | 0.562743 |
| 7195 | 10450622 | <a href="#">BC028847</a>           | <a href="#">73242</a>     | RIKEN cDNA 2610110G12 gene     | <a href="#">2610110G12Rik</a>      | 1.023 | 0.216  | 0.835179 | 0.933323 |
| 7196 | 10374551 |                                    |                           |                                |                                    | 1.023 | -0.182 | 0.860271 | 0.943883 |
| 7197 | 10379539 |                                    |                           |                                |                                    | 1.023 | 0.425  | 0.68309  | 0.859827 |
| 7198 | 10347117 | <a href="#">NM_001080809</a>       | <a href="#">227231</a>    | carbamoyl-phosphate synthetase | <a href="#">Cps1</a>               | 1.023 | 0.57   | 0.585714 | 0.80308  |
| 7199 | 10492335 | <a href="#">NM_028712</a>          | <a href="#">74012</a>     | RAP2B, member of RAS oncogene  | <a href="#">Rap2b</a>              | 1.023 | 0.149  | 0.885506 | 0.955213 |
| 7200 | 10349051 | <a href="#">NM_009399</a>          | <a href="#">21934</a>     | tumor necrosis factor receptor | <a href="#">Tnfrsf11a</a>          | 1.023 | 0.261  | 0.801095 | 0.919467 |
| 7201 | 10365991 | <a href="#">NM_007884</a>          | <a href="#">13516</a>     | epiphycan                      | <a href="#">Epyc</a>               | 1.023 | 0.353  | 0.734475 | 0.886559 |
| 7202 | 10489705 | <a href="#">NM_054055</a>          | <a href="#">114644</a>    | solute carrier family 13 (sodi | <a href="#">Slc13a3</a>            | 1.023 | 0.262  | 0.800614 | 0.91941  |
| 7203 | 10400191 | <a href="#">NM_052973</a>          | <a href="#">94186</a>     | striatin, calmodulin binding p | <a href="#">Strn3</a>              | 1.023 | 0.353  | 0.734217 | 0.886455 |
| 7204 | 10435251 | <a href="#">NM_134251</a>          | <a href="#">171286</a>    | solute carrier family 12 (pota | <a href="#">Slc12a8</a>            | 1.023 | 0.873  | 0.410992 | 0.675081 |
| 7205 | 10487858 | <a href="#">NM_027641</a>          | <a href="#">70997</a>     | sperm flagellar 1              | <a href="#">Spef1</a>              | 1.023 | 0.534  | 0.609631 | 0.818311 |
| 7206 | 10479627 | <a href="#">NM_025482</a>          | <a href="#">66314</a>     | tumor protein D52-like 2       | <a href="#">Tpd52l2</a>            | 1.023 | -0.002 | 0.998173 | 0.99936  |
| 7207 | 10354191 | <a href="#">NM_001033135</a>       | <a href="#">67702</a>     | ring finger protein 149        | <a href="#">Rnf149</a>             | 1.023 | 0.101  | 0.922156 | 0.968977 |
| 7208 | 10370798 | <a href="#">NM_001113548</a>       | <a href="#">66548</a>     | ADAMTS-like 5                  | <a href="#">Adamtsl5</a>           | 1.023 | 0.646  | 0.538154 | 0.771126 |
| 7209 | 10601659 | <a href="#">NM_026838</a>          | <a href="#">68792</a>     | sushi-repeat-containing protei | <a href="#">SrpX2</a>              | 1.023 | 0.658  | 0.530935 | 0.765398 |
| 7210 | 10456329 |                                    |                           |                                |                                    | 1.023 | 0.111  | 0.914719 | 0.966446 |
| 7211 | 10472418 | <a href="#">AK039017</a>           | <a href="#">100038743</a> | predicted gene, OTTMUSG0000001 | <a href="#">OTTMUSG00000013098</a> | 1.023 | 0.157  | 0.87971  | 0.952314 |
| 7212 | 10393309 | <a href="#">BC029621</a>           | <a href="#">67763</a>     | phosphoribosyl pyrophosphate s | <a href="#">Prpsap1</a>            | 1.023 | -0.122 | 0.906275 | 0.963405 |
| 7213 | 10526630 | <a href="#">NM_015799</a>          | <a href="#">50765</a>     | transferrin receptor 2         | <a href="#">Trfr2</a>              | 1.023 | 0.963  | 0.366583 | 0.637472 |
| 7214 | 10473363 | <a href="#">NM_013899</a>          | <a href="#">30059</a>     | translocase of inner mitochond | <a href="#">Timm10</a>             | 1.023 | -0.119 | 0.908492 | 0.963723 |
| 7215 | 10501649 | <a href="#">NM_025517</a>          | <a href="#">66368</a>     | RNA terminal phosphate cyclase | <a href="#">Rtcd1</a>              | 1.023 | -0.025 | 0.980836 | 0.991919 |
| 7216 | 10604612 |                                    |                           |                                |                                    | 1.023 | 0.755  | 0.474148 | 0.725639 |
| 7217 | 10446309 | <a href="#">NM_001081653</a>       | <a href="#">620292</a>    | contactin associated protein-1 | <a href="#">Cntnap5c</a>           | 1.023 | 0.626  | 0.550874 | 0.781094 |
| 7218 | 10534654 | <a href="#">NM_027318</a>          | <a href="#">70103</a>     | zinc finger, HIT domain contai | <a href="#">Znhit1</a>             | 1.023 | -0.204 | 0.843875 | 0.936634 |
| 7219 | 10377490 | <a href="#">NM_009659</a>          | <a href="#">11686</a>     | arachidonate 12-lipoxygenase,  | <a href="#">Alox12b</a>            | 1.023 | -0.115 | 0.911243 | 0.964566 |
| 7220 | 10371176 | <a href="#">NM_008688</a>          | <a href="#">18029</a>     | nuclear factor I/C             | <a href="#">Nfic</a>               | 1.023 | 0.168  | 0.871274 | 0.948575 |
| 7221 | 10557587 | <a href="#">NM_177362</a>          | <a href="#">244216</a>    | zinc finger protein 771        | <a href="#">Zfp771</a>             | 1.023 | 0.49   | 0.638362 | 0.835923 |
| 7222 | 10475708 | <a href="#">NM_026678</a>          | <a href="#">109778</a>    | bilirubin reductase A          | <a href="#">Blvra</a>              | 1.023 | 0.198  | 0.848198 | 0.938472 |
| 7223 | 10438498 | <a href="#">NM_175684</a>          | <a href="#">519202</a>    | FCH and double SH3 domains 1   | <a href="#">Fchsdl</a>             | 1.023 | 0.631  | 0.547688 | 0.778543 |
| 7224 | 10422718 | <a href="#">NM_026213</a>          | <a href="#">67515</a>     | tetratricopeptide repeat domai | <a href="#">Ttc33</a>              | 1.023 | 0.432  | 0.67839  | 0.857067 |
| 7225 | 10431371 | <a href="#">NM_199198</a>          | <a href="#">170787</a>    | histone deacetylase 10         | <a href="#">Hdac10</a>             | 1.023 | 0.712  | 0.498876 | 0.742429 |
| 7226 | 10352947 | <a href="#">NM_025300</a>          | <a href="#">27395</a>     | mitochondrial ribosomal protei | <a href="#">Mrpl15</a>             | 1.023 | -0.123 | 0.90538  | 0.963333 |
| 7227 | 10531208 | <a href="#">NM_001033310</a>       | <a href="#">231430</a>    | COX18 cytochrome c oxidase ass | <a href="#">Cox18</a>              | 1.023 | 0.313  | 0.763352 | 0.901493 |
| 7228 | 10594322 | <a href="#">NM_019663</a>          | <a href="#">56469</a>     | protein inhibitor of activated | <a href="#">Pias1</a>              | 1.023 | 0.039  | 0.970055 | 0.987783 |
| 7229 | 10581643 |                                    |                           |                                |                                    | 1.023 | 0.856  | 0.419481 | 0.681847 |

|      |          |                                    |                        |                                 |                                   |       |        |          |          |
|------|----------|------------------------------------|------------------------|---------------------------------|-----------------------------------|-------|--------|----------|----------|
| 7230 | 10346374 | <a href="#">NM_009676</a>          | <a href="#">11761</a>  | aldehyde oxidase 1              | <a href="#">Aox1</a>              | 1.023 | 0.787  | 0.456571 | 0.712611 |
| 7231 | 10595911 | <a href="#">NR_003248</a>          | <a href="#">768252</a> | forkhead box L2 opposite stran  | <a href="#">Foxl2os</a>           | 1.023 | 0.804  | 0.447197 | 0.704901 |
| 7232 | 10458355 | <a href="#">NM_146085</a>          | <a href="#">225372</a> | amyloid beta (A4) precursor pr  | <a href="#">Apbp3</a>             | 1.023 | 0.119  | 0.908344 | 0.963723 |
| 7233 | 10529041 | <a href="#">NM_016703</a>          | <a href="#">50907</a>  | prolactin regulatory element b  | <a href="#">Preb</a>              | 1.023 | 0.008  | 0.994045 | 0.997702 |
| 7234 | 10470349 | <a href="#">NM_001001322</a>       | <a href="#">279028</a> | a disintegrin-like and metallo  | <a href="#">Adamts13</a>          | 1.023 | 0.533  | 0.610099 | 0.818617 |
| 7235 | 10551626 | <a href="#">NM_010706</a>          | <a href="#">16855</a>  | lectin, galactose binding, sol  | <a href="#">Lgals4</a>            | 1.023 | 0.31   | 0.765122 | 0.90235  |
| 7236 | 10400054 |                                    |                        |                                 |                                   | 1.023 | 0.9    | 0.397139 | 0.664239 |
| 7237 | 10462231 | <a href="#">NM_145831</a>          | <a href="#">226049</a> | doublesex and mab-3 related tr  | <a href="#">Dmrt2</a>             | 1.023 | 0.12   | 0.908092 | 0.963723 |
| 7238 | 10356833 | <a href="#">NM_021537</a>          | <a href="#">59041</a>  | serine/threonine kinase 25 (ye  | <a href="#">Stk25</a>             | 1.023 | 0.357  | 0.731631 | 0.884308 |
| 7239 | 10445542 |                                    |                        |                                 |                                   | 1.023 | 0.48   | 0.64529  | 0.839839 |
| 7240 | 10486697 | <a href="#">ENSMUST00000110675</a> | <a href="#">640543</a> | transglutaminase 7              | <a href="#">Tgm7</a>              | 1.023 | 0.38   | 0.715225 | 0.875355 |
| 7241 | 10512728 | <a href="#">NM_173033</a>          | <a href="#">272027</a> | cDNA sequence BC057893          | <a href="#">BC057893</a>          | 1.023 | -0.237 | 0.819394 | 0.928264 |
| 7242 | 10562382 | <a href="#">NM_025948</a>          | <a href="#">67070</a>  | LSM14 homolog A (SCD6, S. cere  | <a href="#">Lsm14a</a>            | 1.022 | 0.402  | 0.699031 | 0.868099 |
| 7243 | 10576661 | <a href="#">NM_010578</a>          | <a href="#">16412</a>  | integrin beta 1 (fibronectin r  | <a href="#">Itgb1</a>             | 1.022 | 0.283  | 0.784917 | 0.912507 |
| 7244 | 10518494 | <a href="#">NM_001083342</a>       | <a href="#">242748</a> | patched domain containing 2     | <a href="#">Ptchd2</a>            | 1.022 | 0.213  | 0.837074 | 0.934383 |
| 7245 | 10381548 | <a href="#">NM_153544</a>          | <a href="#">217216</a> | cDNA sequence BC030867          | <a href="#">BC030867</a>          | 1.022 | -0.167 | 0.871824 | 0.94878  |
| 7246 | 10599487 | <a href="#">NM_028773</a>          | <a href="#">74131</a>  | SAM and SH3 domain containing   | <a href="#">Sash3</a>             | 1.022 | 0.951  | 0.372506 | 0.642907 |
| 7247 | 10427418 |                                    |                        |                                 |                                   | 1.022 | -0.142 | 0.891117 | 0.957456 |
| 7248 | 10480605 | <a href="#">NM_021393</a>          | <a href="#">58202</a>  | cofactor of BRCA1               | <a href="#">Cobra1</a>            | 1.022 | 0.343  | 0.741338 | 0.889595 |
| 7249 | 10585825 | <a href="#">NM_026942</a>          | <a href="#">69106</a>  | stomatin-like 1                 | <a href="#">Stoml1</a>            | 1.022 | 0.332  | 0.749374 | 0.893972 |
| 7250 | 10465881 | <a href="#">NM_011913</a>          | <a href="#">24115</a>  | bestrophin 1                    | <a href="#">Best1</a>             | 1.022 | 0.436  | 0.675382 | 0.855772 |
| 7251 | 10550980 | <a href="#">NM_133743</a>          | <a href="#">72434</a>  | Ly6/Plaur domain containing 3   | <a href="#">Lypd3</a>             | 1.022 | 0.314  | 0.762304 | 0.901088 |
| 7252 | 10569341 | <a href="#">NR_001592</a>          | <a href="#">14955</a>  | H19 fetal liver mRNA            | <a href="#">H19</a>               | 1.022 | 0.098  | 0.924862 | 0.970324 |
| 7253 | 10530892 | <a href="#">NM_007683</a>          | <a href="#">12617</a>  | centromere protein C1           | <a href="#">Cenpc1</a>            | 1.022 | -0.26  | 0.801983 | 0.919813 |
| 7254 | 10432593 | <a href="#">NM_153407</a>          | <a href="#">207785</a> | cysteine-serine-rich nuclear p  | <a href="#">Csnrp2</a>            | 1.022 | 0.542  | 0.604015 | 0.815116 |
| 7255 | 10521515 | <a href="#">NM_145920</a>          | <a href="#">68525</a>  | Ellis van Creveld syndrome 2 h  | <a href="#">Evc2</a>              | 1.022 | 0.745  | 0.479708 | 0.729728 |
| 7256 | 10371970 | <a href="#">BC121826</a>           | <a href="#">71761</a>  | amidohydrolase domain containi  | <a href="#">Amdhd1</a>            | 1.022 | 0.113  | 0.913235 | 0.96552  |
| 7257 | 10433536 | <a href="#">NM_177562</a>          | <a href="#">74374</a>  | C-type lectin domain family 16  | <a href="#">Clec16a</a>           | 1.022 | 0.664  | 0.527095 | 0.762858 |
| 7258 | 10483401 | <a href="#">NM_025565</a>          | <a href="#">66442</a>  | SPC25, NDC80 kinetochore compl  | <a href="#">Spc25</a>             | 1.022 | 0.093  | 0.928358 | 0.971746 |
| 7259 | 10593767 | <a href="#">NM_148944</a>          | <a href="#">108015</a> | cholinergic receptor, nicotini  | <a href="#">Chrb4</a>             | 1.022 | 0.314  | 0.762574 | 0.901202 |
| 7260 | 10597875 | <a href="#">NM_010012</a>          | <a href="#">13124</a>  | cytochrome P450, family 8, sub  | <a href="#">Cyp8b1</a>            | 1.022 | 0.521  | 0.618059 | 0.82356  |
| 7261 | 10497309 | <a href="#">NM_029068</a>          | <a href="#">74718</a>  | sorting nexin 16                | <a href="#">Snx16</a>             | 1.022 | 0.116  | 0.911071 | 0.964566 |
| 7262 | 10438801 | <a href="#">NM_183064</a>          | <a href="#">14167</a>  | fibroblast growth factor 12     | <a href="#">Fgf12</a>             | 1.022 | 0.235  | 0.820732 | 0.92863  |
| 7263 | 10537406 | <a href="#">NM_001101507</a>       | <a href="#">665180</a> | C-type lectin domain family, m  | <a href="#">Clec2l</a>            | 1.022 | 0.23   | 0.824156 | 0.929508 |
| 7264 | 10558118 | <a href="#">NM_001081038</a>       | <a href="#">330660</a> | BTB (POZ) domain containing 16  | <a href="#">Btbd16</a>            | 1.022 | 0.247  | 0.812062 | 0.924124 |
| 7265 | 10401944 |                                    |                        |                                 |                                   | 1.022 | 0.292  | 0.778836 | 0.910097 |
| 7266 | 10577048 | <a href="#">NM_133971</a>          | <a href="#">102334</a> | ankyrin repeat domain 10        | <a href="#">Ankrd10</a>           | 1.022 | 0.154  | 0.882143 | 0.953469 |
| 7267 | 10590558 | <a href="#">NM_011606</a>          | <a href="#">21922</a>  | C-type lectin domain family 3,  | <a href="#">Clec3b</a>            | 1.022 | -0.03  | 0.977116 | 0.990609 |
| 7268 | 10571647 | <a href="#">BC049135</a>           | <a href="#">66756</a>  | RIKEN cDNA 4933411K20 gene      | <a href="#">4933411K20Rik</a>     | 1.022 | 0.387  | 0.70993  | 0.873031 |
| 7269 | 10568434 |                                    |                        |                                 |                                   | 1.022 | 0.212  | 0.837625 | 0.934421 |
| 7270 | 10403975 | <a href="#">ENSMUST00000055536</a> | <a href="#">193453</a> | predicted gene, OTTMUSG0000000  | <a href="#">OTTMUSG0000000469</a> | 1.022 | 0.15   | 0.884894 | 0.954845 |
| 7271 | 10546066 | <a href="#">NM_133934</a>          | <a href="#">57905</a>  | ISY1 splicing factor homolog (  | <a href="#">Isy1</a>              | 1.022 | -0.111 | 0.91502  | 0.966585 |
| 7272 | 10605614 |                                    |                        |                                 |                                   | 1.022 | 0.523  | 0.616554 | 0.822954 |
| 7273 | 10562486 | <a href="#">NM_145840</a>          | <a href="#">243923</a> | regulator of G-protein signal1  | <a href="#">Rgs9bp</a>            | 1.022 | 0.535  | 0.60894  | 0.817955 |
| 7274 | 10515690 | <a href="#">ENSMUST00000075406</a> | <a href="#">230676</a> | cDNA sequence BC059842          | <a href="#">BC059842</a>          | 1.022 | 0.199  | 0.848075 | 0.938472 |
| 7275 | 10576401 |                                    |                        |                                 |                                   | 1.022 | 0.383  | 0.713017 | 0.874277 |
| 7276 | 10363735 | <a href="#">NM_010118</a>          | <a href="#">13654</a>  | early growth response 2         | <a href="#">Egr2</a>              | 1.022 | 0.132  | 0.898704 | 0.960077 |
| 7277 | 10490894 | <a href="#">NM_007892</a>          | <a href="#">13559</a>  | E2F transcription factor 5      | <a href="#">E2f5</a>              | 1.022 | 0.13   | 0.899817 | 0.960314 |
| 7278 | 10515878 | <a href="#">NM_011732</a>          | <a href="#">22608</a>  | Y box protein 1                 | <a href="#">Ybx1</a>              | 1.022 | -0.315 | 0.761539 | 0.900659 |
| 7279 | 10463457 | <a href="#">NM_145503</a>          | <a href="#">226154</a> | leucine zipper, putative tumor  | <a href="#">Lzts2</a>             | 1.022 | 0.188  | 0.856427 | 0.941981 |
| 7280 | 10559385 | <a href="#">NM_145379</a>          | <a href="#">211577</a> | MAS-related GPR, member F       | <a href="#">Mrgprf</a>            | 1.022 | 1.12   | 0.298736 | 0.574899 |
| 7281 | 10584200 | <a href="#">NM_028040</a>          | <a href="#">71989</a>  | RNA pseudouridylyate synthase d | <a href="#">Rpusd4</a>            | 1.022 | -0.039 | 0.970035 | 0.987783 |

|      |          |                                    |                           |                                 |                                    |       |        |          |          |
|------|----------|------------------------------------|---------------------------|---------------------------------|------------------------------------|-------|--------|----------|----------|
| 7282 | 10520622 | <a href="#">NR_003522</a>          | <a href="#">57742</a>     | abhydrolase domain containing   | <a href="#">Abhd1</a>              | 1.022 | 0.102  | 0.921414 | 0.968656 |
| 7283 | 10416464 | <a href="#">NM_026083</a>          | <a href="#">67302</a>     | zinc finger CCCH type containi  | <a href="#">Zc3h13</a>             | 1.022 | 0.038  | 0.970995 | 0.988148 |
| 7284 | 10363312 | <a href="#">BC119028</a>           | <a href="#">76138</a>     | coiled-coil domain containing   | <a href="#">Ccdc138</a>            | 1.022 | 0.44   | 0.67291  | 0.854651 |
| 7285 | 10595156 | <a href="#">NM_025274</a>          | <a href="#">434423</a>    | developmental pluripotency ass  | <a href="#">Dppa5a</a>             | 1.022 | -0.331 | 0.749998 | 0.894414 |
| 7286 | 10457273 | <a href="#">NM_008448</a>          | <a href="#">16573</a>     | kinesin family member 5B        | <a href="#">Kif5b</a>              | 1.022 | 0.25   | 0.80931  | 0.923176 |
| 7287 | 10401192 | <a href="#">NM_001008550</a>       | <a href="#">211978</a>    | zinc finger, FYVE domain conta  | <a href="#">Zfyve26</a>            | 1.022 | 0.72   | 0.49409  | 0.739456 |
| 7288 | 10495891 | <a href="#">NM_173451</a>          | <a href="#">271970</a>    | arylsulfatase J                 | <a href="#">Arsj</a>               | 1.022 | 0.472  | 0.650886 | 0.843602 |
| 7289 | 10592830 | <a href="#">NM_027889</a>          | <a href="#">71732</a>     | vacuolar protein sorting 11 (y  | <a href="#">Vps11</a>              | 1.022 | 0.047  | 0.964079 | 0.985864 |
| 7290 | 10432006 | <a href="#">NM_019572</a>          | <a href="#">56233</a>     | histone deacetylase 7           | <a href="#">Hdac7</a>              | 1.022 | 0.716  | 0.496497 | 0.741014 |
| 7291 | 10497808 | <a href="#">NM_198192</a>          | <a href="#">229214</a>    | G protein-coupled receptor 103  | <a href="#">Gpr103</a>             | 1.022 | 0.87   | 0.412403 | 0.676163 |
| 7292 | 10564813 | <a href="#">NM_008588</a>          | <a href="#">17292</a>     | mesoderm posterior 1            | <a href="#">Mesp1</a>              | 1.022 | -0.449 | 0.666699 | 0.851355 |
| 7293 | 10565813 | <a href="#">NR_002172</a>          | <a href="#">449630</a>    | predicted gene, EG449630        | <a href="#">EG449630</a>           | 1.022 | 0.558  | 0.593597 | 0.808175 |
| 7294 | 10494160 | <a href="#">NM_016712</a>          | <a href="#">50874</a>     | tropomodulin 4                  | <a href="#">Tmod4</a>              | 1.022 | 0.402  | 0.699298 | 0.868281 |
| 7295 | 10387588 | <a href="#">NM_009089</a>          | <a href="#">20020</a>     | polymerase (RNA) II (DNA direc  | <a href="#">Polr2a</a>             | 1.022 | 0.159  | 0.877766 | 0.951715 |
| 7296 | 10391697 | <a href="#">NM_010575</a>          | <a href="#">16399</a>     | integrin alpha 2b               | <a href="#">Itga2b</a>             | 1.022 | 0.621  | 0.553547 | 0.783151 |
| 7297 | 10565292 | <a href="#">NM_007488</a>          | <a href="#">11864</a>     | aryl hydrocarbon receptor nucl  | <a href="#">Ahr2</a>               | 1.022 | 0.341  | 0.742824 | 0.89053  |
| 7298 | 10463981 | <a href="#">ENSMUST00000095969</a> | <a href="#">73713</a>     | RNA binding motif protein 20    | <a href="#">Rbm20</a>              | 1.022 | 0.696  | 0.508028 | 0.749912 |
| 7299 | 10557655 | <a href="#">ENSMUST00000084563</a> | <a href="#">546001</a>    | Snf2-related CREBBP activator   | <a href="#">Srcap</a>              | 1.022 | 0.61   | 0.560279 | 0.787564 |
| 7300 | 10532594 | <a href="#">XM_912851</a>          | <a href="#">74376</a>     | myosin XVIIIb                   | <a href="#">Myo18b</a>             | 1.022 | 0.321  | 0.757594 | 0.898154 |
| 7301 | 10454252 |                                    |                           |                                 |                                    | 1.022 | -0.43  | 0.679428 | 0.857705 |
| 7302 | 10529305 | <a href="#">NM_026698</a>          | <a href="#">68366</a>     | transmembrane protein 129       | <a href="#">Tmem129</a>            | 1.022 | 0.332  | 0.749687 | 0.894292 |
| 7303 | 10373439 | <a href="#">NM_134003</a>          | <a href="#">103284</a>    | zinc finger CCCH type containi  | <a href="#">Zc3h10</a>             | 1.022 | 0.659  | 0.5306   | 0.765382 |
| 7304 | 10414623 | <a href="#">BC059018</a>           | <a href="#">268739</a>    | RIKEN cDNA E130112L23 gene      | <a href="#">E130112L23Rik</a>      | 1.022 | 0.554  | 0.596053 | 0.80968  |
| 7305 | 10443276 | <a href="#">NM_001004366</a>       | <a href="#">268935</a>    | signal peptide, CUB domain, EG  | <a href="#">Scube3</a>             | 1.022 | -0.025 | 0.980632 | 0.991919 |
| 7306 | 10464169 | <a href="#">ENSMUST00000099297</a> | <a href="#">75628</a>     | RIKEN cDNA 1700010L13 gene      | <a href="#">1700010L13Rik</a>      | 1.022 | -0.056 | 0.956986 | 0.983559 |
| 7307 | 10525185 | <a href="#">XM_001473338</a>       | <a href="#">100039686</a> | hypothetical protein LOC100039  | <a href="#">LOC100039686</a>       | 1.022 | 0.224  | 0.828943 | 0.931175 |
| 7308 | 10546163 | <a href="#">NM_008564</a>          | <a href="#">17216</a>     | minichromosome maintenance def  | <a href="#">Mcm2</a>               | 1.022 | -0.212 | 0.838229 | 0.934421 |
| 7309 | 10361712 | <a href="#">NM_172937</a>          | <a href="#">268281</a>    | SNF2 histone linker PHD RING h  | <a href="#">Shprh</a>              | 1.022 | 0.063  | 0.95142  | 0.981144 |
| 7310 | 10402519 | <a href="#">NM_029654</a>          | <a href="#">76559</a>     | ATG2 autophagy related 2 homol  | <a href="#">Atg2b</a>              | 1.021 | 0.198  | 0.84815  | 0.938472 |
| 7311 | 10408739 | <a href="#">ENSMUST00000078232</a> | <a href="#">669420</a>    | predicted gene, ENSMUSG0000006  | <a href="#">ENSMUSG00000063303</a> | 1.021 | 0.403  | 0.698541 | 0.867855 |
| 7312 | 10583920 | <a href="#">NM_026189</a>          | <a href="#">67484</a>     | endonuclease/exonuclease/phosp  | <a href="#">Eepd1</a>              | 1.021 | 0.183  | 0.859616 | 0.943578 |
| 7313 | 10407511 |                                    |                           |                                 |                                    | 1.021 | 0.403  | 0.698544 | 0.867855 |
| 7314 | 10408741 | <a href="#">NM_145367</a>          | <a href="#">105245</a>    | thioredoxin domain containing   | <a href="#">Txndc5</a>             | 1.021 | -0.269 | 0.795298 | 0.916955 |
| 7315 | 10579089 | <a href="#">NM_177899</a>          | <a href="#">330788</a>    | RIKEN cDNA D330038O06 gene      | <a href="#">D330038O06Rik</a>      | 1.021 | 0.166  | 0.872698 | 0.949165 |
| 7316 | 10360321 | <a href="#">NM_026725</a>          | <a href="#">68440</a>     | dual specificity phosphatase 2  | <a href="#">Dusp23</a>             | 1.021 | -0.011 | 0.991721 | 0.996671 |
| 7317 | 10357878 | <a href="#">NM_001008533</a>       | <a href="#">11539</a>     | adenosine A1 receptor           | <a href="#">Adora1</a>             | 1.021 | 0.565  | 0.588942 | 0.805212 |
| 7318 | 10562130 | <a href="#">NM_194057</a>          | <a href="#">233081</a>    | free fatty acid receptor 1      | <a href="#">Ffar1</a>              | 1.021 | 0.116  | 0.910629 | 0.96426  |
| 7319 | 10448186 | <a href="#">NM_029281</a>          | <a href="#">75424</a>     | zinc finger protein 820         | <a href="#">Zfp820</a>             | 1.021 | 0.223  | 0.829945 | 0.93159  |
| 7320 | 10478967 | <a href="#">NM_024199</a>          | <a href="#">67337</a>     | cleavage stimulation factor, 3  | <a href="#">Cstf1</a>              | 1.021 | 0.054  | 0.958471 | 0.984334 |
| 7321 | 10583122 | <a href="#">NM_013903</a>          | <a href="#">30800</a>     | matrix metalloproteinase 20 (en | <a href="#">Mmp20</a>              | 1.021 | 0.381  | 0.714527 | 0.875126 |
| 7322 | 10572419 | <a href="#">NM_007924</a>          | <a href="#">13716</a>     | elongation factor RNA polymera  | <a href="#">Eif1</a>               | 1.021 | 0.411  | 0.693261 | 0.865563 |
| 7323 | 10593032 | <a href="#">ENSMUST00000098827</a> | <a href="#">100038468</a> | predicted gene, ENSMUSG0000007  | <a href="#">ENSMUSG00000074385</a> | 1.021 | 0.478  | 0.646917 | 0.840859 |
| 7324 | 10429520 | <a href="#">NM_010742</a>          | <a href="#">17068</a>     | lymphocyte antigen 6 complex,   | <a href="#">Ly6d</a>               | 1.021 | 0.336  | 0.74619  | 0.892285 |
| 7325 | 10460735 | <a href="#">NM_001111317</a>       | <a href="#">433215</a>    | cDNA sequence BC048609          | <a href="#">BC048609</a>           | 1.021 | 0.313  | 0.763304 | 0.901493 |
| 7326 | 10384615 | <a href="#">NM_011023</a>          | <a href="#">18423</a>     | orthodenticle homolog 1 (Droso  | <a href="#">Otx1</a>               | 1.021 | 0.794  | 0.452364 | 0.708922 |
| 7327 | 10351640 |                                    |                           |                                 |                                    | 1.021 | 0.252  | 0.808286 | 0.922808 |
| 7328 | 10553813 | <a href="#">NM_011668</a>          | <a href="#">22215</a>     | ubiquitin protein ligase E3A    | <a href="#">Ube3a</a>              | 1.021 | 0.465  | 0.655911 | 0.846006 |
| 7329 | 10556820 | <a href="#">NM_145586</a>          | <a href="#">233806</a>    | transmembrane protein 159       | <a href="#">Tmem159</a>            | 1.021 | 0.416  | 0.689683 | 0.863782 |
| 7330 | 10535410 |                                    |                           |                                 |                                    | 1.021 | 0.798  | 0.450141 | 0.707431 |
| 7331 | 10568282 | <a href="#">NM_009746</a>          | <a href="#">12055</a>     | B-cell CLL/lymphoma 7C          | <a href="#">Bcl7c</a>              | 1.021 | 0.042  | 0.967871 | 0.987137 |
| 7332 | 10421557 | <a href="#">NM_008410</a>          | <a href="#">16422</a>     | integral membrane protein 2B    | <a href="#">Tmem2b</a>             | 1.021 | 0.104  | 0.910700 | 0.967052 |

|      |          |                                    |                           |                                |                               |       |        |          |          |
|------|----------|------------------------------------|---------------------------|--------------------------------|-------------------------------|-------|--------|----------|----------|
| 7332 | 10421337 | <a href="#">NM_008410</a>          | <a href="#">10432</a>     | integral membrane protein 2b   | <a href="#">Iim20</a>         | 1.021 | -0.104 | 0.919709 | 0.907932 |
| 7333 | 10580210 | <a href="#">NM_009010</a>          | <a href="#">19358</a>     | RAD23a homolog (S. cerevisiae) | <a href="#">Rad23a</a>        | 1.021 | 0.04   | 0.96952  | 0.987616 |
| 7334 | 10419096 | <a href="#">NM_009160</a>          | <a href="#">20390</a>     | surfactant associated protein  | <a href="#">Sftpd</a>         | 1.021 | 0.611  | 0.560107 | 0.787428 |
| 7335 | 10485607 | <a href="#">NM_001123327</a>       | <a href="#">99003</a>     | glutamine and serine rich 1    | <a href="#">Qser1</a>         | 1.021 | 0.1    | 0.922886 | 0.969148 |
| 7336 | 10460696 | <a href="#">NM_134154</a>          | <a href="#">107375</a>    | solute carrier family 25, memb | <a href="#">Slc25a45</a>      | 1.021 | 0.577  | 0.581427 | 0.800326 |
| 7337 | 10380891 | <a href="#">NM_008890</a>          | <a href="#">18948</a>     | phenylethanolamine-N-methyltra | <a href="#">Pnmt</a>          | 1.021 | 0.121  | 0.906723 | 0.963405 |
| 7338 | 10414703 | <a href="#">ENSMUST00000103568</a> | <a href="#">100042372</a> | T cell receptor alpha variable | <a href="#">Trav2</a>         | 1.021 | 1.138  | 0.291606 | 0.567641 |
| 7339 | 10562601 |                                    |                           |                                |                               | 1.021 | 1.045  | 0.329743 | 0.606148 |
| 7340 | 10383453 | <a href="#">NM_153545</a>          | <a href="#">217366</a>    | leucine rich repeat containing | <a href="#">Lrrc45</a>        | 1.021 | 0.014  | 0.988856 | 0.995308 |
| 7341 | 10407159 | <a href="#">NM_029898</a>          | <a href="#">77318</a>     | ankyrin repeat domain 55       | <a href="#">Ankrd55</a>       | 1.021 | 0.39   | 0.707787 | 0.872268 |
| 7342 | 10546903 | <a href="#">NM_133932</a>          | <a href="#">101206</a>    | transcriptional adaptor 3 (NGG | <a href="#">Tada3l</a>        | 1.021 | -0.017 | 0.987265 | 0.994746 |
| 7343 | 10532216 | <a href="#">NM_199011</a>          | <a href="#">110524</a>    | diacylglycerol kinase, theta   | <a href="#">Dgkq</a>          | 1.021 | 0.202  | 0.845709 | 0.937284 |
| 7344 | 10442893 | <a href="#">NM_173741</a>          | <a href="#">268933</a>    | WD repeat domain 24            | <a href="#">Wdr24</a>         | 1.021 | -0.061 | 0.952895 | 0.981871 |
| 7345 | 10440576 | <a href="#">NM_001081068</a>       | <a href="#">78913</a>     | zinc finger protein 294        | <a href="#">Zfp294</a>        | 1.021 | -0.561 | 0.591969 | 0.807001 |
| 7346 | 10433445 | <a href="#">NM_172961</a>          | <a href="#">268860</a>    | 4-aminobutyrate aminotransfera | <a href="#">Abat</a>          | 1.021 | -0.272 | 0.793164 | 0.915729 |
| 7347 | 10445816 | <a href="#">NM_027452</a>          | <a href="#">70530</a>     | leucine rich repeat and fibron | <a href="#">Lrfn2</a>         | 1.021 | 0.428  | 0.68136  | 0.859075 |
| 7348 | 10376283 |                                    |                           |                                |                               | 1.021 | 0.531  | 0.611614 | 0.819829 |
| 7349 | 10378579 | <a href="#">NM_138659</a>          | <a href="#">192159</a>    | pre-mRNA processing factor 8   | <a href="#">Prpf8</a>         | 1.021 | -0.097 | 0.925322 | 0.970455 |
| 7350 | 10500656 | <a href="#">NM_001099332</a>       | <a href="#">630146</a>    | immunoglobulin superfamily, me | <a href="#">Igsf2</a>         | 1.021 | 0.898  | 0.398228 | 0.664555 |
| 7351 | 10388306 | <a href="#">NM_146707</a>          | <a href="#">258702</a>    | olfactory receptor 410         | <a href="#">Olfr410</a>       | 1.021 | 1.079  | 0.315527 | 0.59239  |
| 7352 | 10385870 |                                    |                           |                                |                               | 1.021 | 1.037  | 0.333269 | 0.609193 |
| 7353 | 10413810 | <a href="#">ENSMUST00000061517</a> | <a href="#">320621</a>    | RIKEN cDNA D830044D21 gene     | <a href="#">D830044D21Rik</a> | 1.021 | 0.676  | 0.520129 | 0.757722 |
| 7354 | 10472570 | <a href="#">NM_001081086</a>       | <a href="#">228005</a>    | peptidyl-prolyl isomerase G (c | <a href="#">Ppig</a>          | 1.021 | 0.164  | 0.874569 | 0.949978 |
| 7355 | 10549171 | <a href="#">NM_029081</a>          | <a href="#">74741</a>     | RIKEN cDNA 5730419I09 gene     | <a href="#">5730419I09Rik</a> | 1.021 | 0.441  | 0.672047 | 0.854437 |
| 7356 | 10547408 | <a href="#">NM_053204</a>          | <a href="#">111173</a>    | ELKS/RAB6-interacting/CAST fam | <a href="#">Erc1</a>          | 1.021 | 0.601  | 0.56622  | 0.792228 |
| 7357 | 10369894 | <a href="#">NR_003644</a>          | <a href="#">108950</a>    | RIKEN cDNA 1700049L16 gene     | <a href="#">1700049L16Rik</a> | 1.021 | 0.667  | 0.525607 | 0.761716 |
| 7358 | 10372235 | <a href="#">NM_001081432</a>       | <a href="#">237523</a>    | protein tyrosine phosphatase,  | <a href="#">Ptrpq</a>         | 1.021 | 0.318  | 0.759513 | 0.899247 |
| 7359 | 10542596 | <a href="#">NM_021471</a>          | <a href="#">58807</a>     | solute carrier organic anion t | <a href="#">Slco1c1</a>       | 1.021 | 0.521  | 0.618031 | 0.82356  |
| 7360 | 10557211 | <a href="#">NM_011247</a>          | <a href="#">19647</a>     | retinoblastoma binding protein | <a href="#">Rbbp6</a>         | 1.021 | 0.503  | 0.629863 | 0.831325 |
| 7361 | 10554156 | <a href="#">BC034069</a>           | <a href="#">100038347</a> | cDNA sequence BC034069         | <a href="#">BC034069</a>      | 1.021 | 0.242  | 0.815258 | 0.925918 |
| 7362 | 10437434 | <a href="#">NM_028301</a>          | <a href="#">72612</a>     | ankyrin repeat and sterile alp | <a href="#">Anks2</a>         | 1.021 | 0.007  | 0.994508 | 0.997749 |
| 7363 | 10478973 | <a href="#">NM_001033538</a>       | <a href="#">320664</a>    | Cas scaffolding protein family | <a href="#">Cass4</a>         | 1.021 | 0.71   | 0.500116 | 0.743152 |
| 7364 | 10585732 | <a href="#">ENSMUST00000053230</a> | <a href="#">71742</a>     | unc-51-like kinase 3 (C. elega | <a href="#">Ulk3</a>          | 1.021 | 0.279  | 0.788138 | 0.913843 |
| 7365 | 10427166 | <a href="#">NM_001014976</a>       | <a href="#">105988</a>    | extra spindle poles-like 1 (S. | <a href="#">Esp1l</a>         | 1.021 | 0.192  | 0.853362 | 0.940713 |
| 7366 | 10441669 | <a href="#">NM_009309</a>          | <a href="#">20997</a>     | brachyury                      | <a href="#">T</a>             | 1.021 | 0.54   | 0.605443 | 0.815953 |
| 7367 | 10558811 | <a href="#">NM_013782</a>          | <a href="#">27388</a>     | phosphatidylserine synthase 2  | <a href="#">Ptdss2</a>        | 1.021 | 0.339  | 0.744166 | 0.89128  |
| 7368 | 10376427 | <a href="#">BC058081</a>           | <a href="#">69944</a>     | RIKEN cDNA 2810021J22 gene     | <a href="#">2810021J22Rik</a> | 1.021 | -0.188 | 0.856312 | 0.941981 |
| 7369 | 10532289 | <a href="#">NM_016715</a>          | <a href="#">57914</a>     | cytokine receptor-like factor  | <a href="#">Crif2</a>         | 1.021 | 0.383  | 0.712806 | 0.874143 |
| 7370 | 10572378 | <a href="#">NM_016685</a>          | <a href="#">12845</a>     | cartilage oligomeric matrix pr | <a href="#">Comp</a>          | 1.021 | 0.544  | 0.602769 | 0.81427  |
| 7371 | 10503995 | <a href="#">NM_008298</a>          | <a href="#">15502</a>     | DnaJ (Hsp40) homolog, subfamil | <a href="#">Dnajl1</a>        | 1.021 | 0.265  | 0.798347 | 0.918353 |
| 7372 | 10505105 |                                    |                           |                                |                               | 1.021 | -0.011 | 0.991479 | 0.996624 |
| 7373 | 10410743 | <a href="#">NM_134071</a>          | <a href="#">105377</a>    | ankyrin repeat domain 32       | <a href="#">Ankrd32</a>       | 1.021 | 0.117  | 0.910343 | 0.96415  |
| 7374 | 10394331 | <a href="#">NM_028376</a>          | <a href="#">382562</a>    | profilin family, member 4      | <a href="#">Pfn4</a>          | 1.021 | 0.422  | 0.685252 | 0.860862 |
| 7375 | 10430127 | <a href="#">NM_001007568</a>       | <a href="#">71591</a>     | zinc finger protein 251        | <a href="#">Zfp251</a>        | 1.021 | -0.055 | 0.957324 | 0.983751 |
| 7376 | 10478778 | <a href="#">NM_001085495</a>       | <a href="#">99371</a>     | ADP-ribosylation factor guanin | <a href="#">Arfgef2</a>       | 1.021 | 0.289  | 0.780892 | 0.91101  |
| 7377 | 10498827 | <a href="#">ENSMUST00000076136</a> | <a href="#">329679</a>    | folliculin interacting protein | <a href="#">Fnip2</a>         | 1.021 | 0.013  | 0.989721 | 0.995512 |
| 7378 | 10456846 |                                    |                           |                                |                               | 1.021 | 0.128  | 0.901682 | 0.961371 |
| 7379 | 10364856 | <a href="#">NM_199322</a>          | <a href="#">208266</a>    | DOT1-like, histone H3 methyltr | <a href="#">Dot1l</a>         | 1.021 | 0.208  | 0.84103  | 0.935759 |
| 7380 | 10535435 | <a href="#">NM_017467</a>          | <a href="#">54201</a>     | zinc finger protein 316        | <a href="#">Zfp316</a>        | 1.021 | 0.202  | 0.845634 | 0.937284 |
| 7381 | 10538438 | <a href="#">BC118940</a>           | <a href="#">330323</a>    | RIKEN cDNA C330043M08 gene     | <a href="#">C330043M08Rik</a> | 1.021 | 0.084  | 0.935554 | 0.974509 |
| 7382 | 10503966 | <a href="#">NM_007386</a>          | <a href="#">11428</a>     | aconitase 1                    | <a href="#">Aco1</a>          | 1.021 | -0.287 | 0.782105 | 0.911385 |
| 7383 | 10527009 | <a href="#">NM_021528</a>          | <a href="#">59031</a>     | carbohydrate sulfotransferase  | <a href="#">Chst12</a>        | 1.021 | 0.158  | 0.878899 | 0.952091 |
| 7384 | 10472782 | <a href="#">NM_026115</a>          | <a href="#">107435</a>    | histone aminotransferase 1     | <a href="#">Hat1</a>          | 1.021 | 0.184  | 0.85896  | 0.943374 |
| 7385 | 10381588 | <a href="#">NM_008175</a>          | <a href="#">14824</a>     | granulin                       | <a href="#">Grn</a>           | 1.021 | -0.47  | 0.652329 | 0.844168 |
| 7386 | 10401365 | <a href="#">NM_183154</a>          | <a href="#">217695</a>    | zinc finger, FYVE domain conta | <a href="#">Zfyve1</a>        | 1.021 | 0.257  | 0.804579 | 0.920913 |

|      |          |                                    |                        |                                 |                                    |       |        |          |          |
|------|----------|------------------------------------|------------------------|---------------------------------|------------------------------------|-------|--------|----------|----------|
| 7387 | 10360412 | <a href="#">NM_146715</a>          | <a href="#">258710</a> | olfactory receptor 419          | <a href="#">Olf419</a>             | 1.021 | 0.202  | 0.845472 | 0.937284 |
| 7388 | 10443786 | <a href="#">NM_008804</a>          | <a href="#">18585</a>  | phosphodiesterase 9A            | <a href="#">Pde9a</a>              | 1.021 | -0.017 | 0.986918 | 0.994585 |
| 7389 | 10590623 | <a href="#">NM_030712</a>          | <a href="#">80901</a>  | chemokine (C-X-C motif) recept  | <a href="#">Cxcr6</a>              | 1.02  | 0.398  | 0.701979 | 0.869258 |
| 7390 | 10424979 | <a href="#">NM_182805</a>          | <a href="#">76282</a>  | glutamic pyruvic transaminase,  | <a href="#">Gpt</a>                | 1.02  | 0.764  | 0.469331 | 0.721467 |
| 7391 | 10587419 | <a href="#">NM_146003</a>          | <a href="#">215351</a> | SUMO/sentrin specific peptidas  | <a href="#">Senp6</a>              | 1.02  | -0.073 | 0.944137 | 0.977948 |
| 7392 | 10507848 |                                    |                        |                                 |                                    | 1.02  | 0.279  | 0.787766 | 0.913537 |
| 7393 | 10382866 | <a href="#">NM_172948</a>          | <a href="#">268510</a> | mannoside acetylglucosaminyltr  | <a href="#">Mgat5b</a>             | 1.02  | 0.726  | 0.490611 | 0.737328 |
| 7394 | 10385647 | <a href="#">NM_172794</a>          | <a href="#">237758</a> | zinc finger protein 454         | <a href="#">Zfp454</a>             | 1.02  | 0.279  | 0.788348 | 0.913849 |
| 7395 | 10404535 | <a href="#">BC049659</a>           | <a href="#">108161</a> | DNA segment, human D6S2654E     | <a href="#">D0H6S2654E</a>         | 1.02  | 0.648  | 0.537058 | 0.770181 |
| 7396 | 10346485 | <a href="#">NM_001008419</a>       | <a href="#">213043</a> | aldehyde oxidase 3-like 1       | <a href="#">Aox3l1</a>             | 1.02  | 0.452  | 0.664207 | 0.850267 |
| 7397 | 10515704 | <a href="#">ENSMUST00000075406</a> | <a href="#">230676</a> | cDNA sequence BC059842          | <a href="#">BC059842</a>           | 1.02  | -0.248 | 0.810903 | 0.923749 |
| 7398 | 10364011 | <a href="#">NM_153406</a>          | <a href="#">74392</a>  | SPECC1-like                     | <a href="#">Specc1l</a>            | 1.02  | 0.234  | 0.821688 | 0.92863  |
| 7399 | 10444788 | <a href="#">NM_010390</a>          | <a href="#">15006</a>  | histocompatibility 2, Q region  | <a href="#">H2-Q1</a>              | 1.02  | 1.06   | 0.323177 | 0.59983  |
| 7400 | 10543524 | <a href="#">NM_028900</a>          | <a href="#">74375</a>  | golgi coiled coil 1             | <a href="#">Gcc1</a>               | 1.02  | 0.28   | 0.786996 | 0.912989 |
| 7401 | 10530652 | <a href="#">NM_001114660</a>       | <a href="#">212986</a> | sec1 family domain containing   | <a href="#">Secf2</a>              | 1.02  | 0.484  | 0.643031 | 0.838239 |
| 7402 | 10386236 | <a href="#">NM_206882</a>          | <a href="#">382522</a> | histone cluster 3, H2bb         | <a href="#">Hist3h2bb</a>          | 1.02  | 0.274  | 0.791767 | 0.915215 |
| 7403 | 10467203 | <a href="#">AK165489</a>           | <a href="#">676676</a> | predicted gene, ENSMUSG0000007  | <a href="#">ENSMUSG00000074893</a> | 1.02  | 0.525  | 0.615108 | 0.82201  |
| 7404 | 10354955 | <a href="#">NM_145143</a>          | <a href="#">227157</a> | membrane protein, palmitoylate  | <a href="#">Mpp4</a>               | 1.02  | 0.488  | 0.640047 | 0.836826 |
| 7405 | 10589327 | <a href="#">AF331517</a>           | <a href="#">171530</a> | urocortin 2                     | <a href="#">Ucn2</a>               | 1.02  | 1.306  | 0.231761 | 0.502487 |
| 7406 | 10400981 | <a href="#">ENSMUST00000070425</a> | <a href="#">380765</a> | RIKEN cDNA D830013O20 gene      | <a href="#">D830013O20Rik</a>      | 1.02  | 0.707  | 0.501898 | 0.744769 |
| 7407 | 10517559 | <a href="#">NM_009861</a>          | <a href="#">12540</a>  | cell division cycle 42 homolog  | <a href="#">Cdc42</a>              | 1.02  | 0.338  | 0.744814 | 0.891598 |
| 7408 | 10388734 | <a href="#">NM_022313</a>          | <a href="#">57837</a>  | Era (G-protein)-like 1 (E. col  | <a href="#">Eral1</a>              | 1.02  | 0.72   | 0.494193 | 0.739551 |
| 7409 | 10361897 | <a href="#">NM_010511</a>          | <a href="#">15979</a>  | interferon gamma receptor 1     | <a href="#">Ifngr1</a>             | 1.02  | -0.148 | 0.886463 | 0.955393 |
| 7410 | 10374929 | <a href="#">NM_176829</a>          | <a href="#">216622</a> | RIKEN cDNA 4931440F15 gene      | <a href="#">4931440F15Rik</a>      | 1.02  | 0.373  | 0.720182 | 0.878163 |
| 7411 | 10602690 | <a href="#">ENSMUST00000096265</a> | <a href="#">436240</a> | predicted gene, EG436240        | <a href="#">EG436240</a>           | 1.02  | 0.435  | 0.676065 | 0.855911 |
| 7412 | 10552715 | <a href="#">ENSMUST00000094460</a> | <a href="#">69578</a>  | RIKEN cDNA 2310016G11 gene      | <a href="#">2310016G11Rik</a>      | 1.02  | 0.556  | 0.594998 | 0.809148 |
| 7413 | 10443009 | <a href="#">NM_026170</a>          | <a href="#">67458</a>  | endoplasmic reticulum-golgi in  | <a href="#">Ergic1</a>             | 1.02  | -0.301 | 0.771847 | 0.905856 |
| 7414 | 10543226 | <a href="#">BC070405</a>           | <a href="#">66520</a>  | RIKEN cDNA 2610001J05 gene      | <a href="#">2610001J05Rik</a>      | 1.02  | 0.366  | 0.725103 | 0.880804 |
| 7415 | 10583324 |                                    |                        |                                 |                                    | 1.02  | -0.131 | 0.89945  | 0.960245 |
| 7416 | 10583697 | <a href="#">NM_011417</a>          | <a href="#">20586</a>  | SWI/SNF related, matrix associ  | <a href="#">Smarca4</a>            | 1.02  | 0.225  | 0.827909 | 0.930688 |
| 7417 | 10417130 | <a href="#">NM_026861</a>          | <a href="#">68889</a>  | ubiquitin associated domain co  | <a href="#">Ubac2</a>              | 1.02  | -0.069 | 0.947013 | 0.978959 |
| 7418 | 10415377 | <a href="#">NM_026403</a>          | <a href="#">67842</a>  | RIKEN cDNA 2610027L16 gene      | <a href="#">2610027L16Rik</a>      | 1.02  | -0.186 | 0.857378 | 0.942484 |
| 7419 | 10571054 | <a href="#">NM_011485</a>          | <a href="#">20845</a>  | steroidogenic acute regulatory  | <a href="#">Star</a>               | 1.02  | 0.346  | 0.738984 | 0.888726 |
| 7420 | 10529858 | <a href="#">NM_173764</a>          | <a href="#">231225</a> | transmembrane anterior posteri  | <a href="#">Tapt1</a>              | 1.02  | 0.103  | 0.921041 | 0.968443 |
| 7421 | 10444041 | <a href="#">NM_023202</a>          | <a href="#">66416</a>  | NADH dehydrogenase (ubiquinone) | <a href="#">Ndufa7</a>             | 1.02  | -0.344 | 0.740458 | 0.889372 |
| 7422 | 10503643 | <a href="#">BC028764</a>           | <a href="#">68493</a>  | RIKEN cDNA 1110007M04 gene      | <a href="#">1110007M04Rik</a>      | 1.02  | -0.25  | 0.809525 | 0.923176 |
| 7423 | 10447951 | <a href="#">NM_011581</a>          | <a href="#">21826</a>  | thrombospondin 2                | <a href="#">Thbs2</a>              | 1.02  | 0.895  | 0.399891 | 0.665979 |
| 7424 | 10561401 | <a href="#">NM_013676</a>          | <a href="#">20924</a>  | suppressor of Ty 5 homolog (S.  | <a href="#">Supt5h</a>             | 1.02  | -0.133 | 0.898103 | 0.959986 |
| 7425 | 10569265 | <a href="#">NM_023764</a>          | <a href="#">54473</a>  | toll interacting protein        | <a href="#">Tollip</a>             | 1.02  | 0.343  | 0.74104  | 0.889595 |
| 7426 | 10369307 | <a href="#">NM_023370</a>          | <a href="#">22295</a>  | cadherin 23 (otocadherin)       | <a href="#">Cdh23</a>              | 1.02  | 0.176  | 0.864769 | 0.946153 |
| 7427 | 10559389 | <a href="#">NM_203490</a>          | <a href="#">211578</a> | MAS-related GPR, member D       | <a href="#">Mrgprd</a>             | 1.02  | 0.351  | 0.735381 | 0.886785 |
| 7428 | 10371396 | <a href="#">NM_028832</a>          | <a href="#">74238</a>  | MTERF domain containing 3       | <a href="#">Mterfd3</a>            | 1.02  | 0.344  | 0.740374 | 0.889357 |
| 7429 | 10564500 |                                    |                        |                                 |                                    | 1.02  | 0.239  | 0.817511 | 0.927282 |
| 7430 | 10592330 | <a href="#">NM_022029</a>          | <a href="#">64011</a>  | neurogranin                     | <a href="#">Nrgn</a>               | 1.02  | 0.728  | 0.489295 | 0.736434 |
| 7431 | 10497644 | <a href="#">AK016981</a>           | <a href="#">71280</a>  | RIKEN cDNA 4933429H19 gene      | <a href="#">4933429H19Rik</a>      | 1.02  | 0.338  | 0.744835 | 0.891598 |
| 7432 | 10574410 | <a href="#">ENSMUST00000098472</a> | <a href="#">319960</a> | RIKEN cDNA 4930513N10 gene      | <a href="#">4930513N10Rik</a>      | 1.02  | 0.219  | 0.832894 | 0.932703 |
| 7433 | 10566822 | <a href="#">NM_020052</a>          | <a href="#">56788</a>  | signal peptide, CUB domain, EG  | <a href="#">Scube2</a>             | 1.02  | 0.728  | 0.489428 | 0.736546 |
| 7434 | 10374315 | <a href="#">NM_177033</a>          | <a href="#">319922</a> | von Willebrand factor C domain  | <a href="#">Vwc2</a>               | 1.02  | 0.485  | 0.641971 | 0.837836 |
| 7435 | 10375820 | <a href="#">NM_007714</a>          | <a href="#">12750</a>  | CDC like kinase 4               | <a href="#">Clk4</a>               | 1.02  | 0.464  | 0.656577 | 0.846246 |
| 7436 | 10491091 | <a href="#">NM_009425</a>          | <a href="#">22035</a>  | tumor necrosis factor (ligand)  | <a href="#">Tnfsf10</a>            | 1.02  | -0.045 | 0.965347 | 0.986124 |

|      |          |                                    |                           |                                   |                                    |       |        |          |          |
|------|----------|------------------------------------|---------------------------|-----------------------------------|------------------------------------|-------|--------|----------|----------|
| 7437 | 10351465 | <a href="#">NM_001033185</a>       | <a href="#">78465</a>     | RIKEN cDNA 1700084C01 gene        | <a href="#">1700084C01Rik</a>      | 1.02  | 0.531  | 0.611287 | 0.819546 |
| 7438 | 10410173 | <a href="#">NM_133680</a>          | <a href="#">66631</a>     | hippocampus abundant transcrip    | <a href="#">Hiat1l</a>             | 1.02  | 0.159  | 0.878193 | 0.951744 |
| 7439 | 10376074 | <a href="#">NM_011031</a>          | <a href="#">18452</a>     | procollagen-proline, 2-oxoglut    | <a href="#">P4ha2</a>              | 1.02  | 0.091  | 0.930328 | 0.97262  |
| 7440 | 10605766 | <a href="#">NM_019791</a>          | <a href="#">94275</a>     | melanoma antigen, family D, 1     | <a href="#">Maged1</a>             | 1.02  | 0.18   | 0.861809 | 0.94442  |
| 7441 | 10500069 | <a href="#">NM_008847</a>          | <a href="#">18720</a>     | phosphatidylinositol-4-phospha    | <a href="#">Pip5k1a</a>            | 1.02  | -0.002 | 0.998478 | 0.999521 |
| 7442 | 10384654 | <a href="#">XR_032901</a>          | <a href="#">666078</a>    | similar to Rps16 protein          | <a href="#">LOC666078</a>          | 1.02  | -0.04  | 0.96939  | 0.987616 |
| 7443 | 10516784 |                                    |                           |                                   |                                    | 1.02  | 0.506  | 0.628229 | 0.830922 |
| 7444 | 10594248 | <a href="#">NM_018853</a>          | <a href="#">56040</a>     | ribosomal protein, large, P1      | <a href="#">Rplp1</a>              | 1.02  | 0.042  | 0.967834 | 0.987137 |
| 7445 | 10593205 | <a href="#">NM_024233</a>          | <a href="#">104444</a>    | REX2, RNA exonuclease 2<br>homolo | <a href="#">Rexo2</a>              | 1.02  | -0.397 | 0.70294  | 0.869729 |
| 7446 | 10512612 | <a href="#">BC119804</a>           | <a href="#">242408</a>    | RIKEN cDNA 4930412F15 gene        | <a href="#">4930412F15Rik</a>      | 1.02  | 0.144  | 0.889791 | 0.956712 |
| 7447 | 10532596 | <a href="#">XM_912851</a>          | <a href="#">74376</a>     | myosin XVIIIb                     | <a href="#">Myo18b</a>             | 1.02  | 0.281  | 0.786346 | 0.912868 |
| 7448 | 10382047 | <a href="#">ENSMUST00000100326</a> | <a href="#">100038448</a> | predicted gene,<br>ENSMUSG0000007 | <a href="#">ENSMUSG00000075480</a> | 1.02  | 0.776  | 0.462261 | 0.716783 |
| 7449 | 10532524 | <a href="#">NM_027323</a>          | <a href="#">70118</a>     | SRR1 domain containing            | <a href="#">Srrd</a>               | 1.02  | -0.114 | 0.912032 | 0.96491  |
| 7450 | 10391744 | <a href="#">AK135410</a>           | <a href="#">100038535</a> | predicted gene,<br>ENSMUSG0000007 | <a href="#">ENSMUSG00000075516</a> | 1.02  | 0.287  | 0.782165 | 0.911391 |
| 7451 | 10536620 | <a href="#">NM_023626</a>          | <a href="#">71777</a>     | inhibitor of growth family, me    | <a href="#">Ing3</a>               | 1.02  | -0.21  | 0.839366 | 0.935017 |
| 7452 | 10419284 | <a href="#">ENSMUST00000074862</a> | <a href="#">328388</a>    | predicted gene,<br>ENSMUSG0000006 | <a href="#">ENSMUSG00000061510</a> | 1.019 | 0.787  | 0.456237 | 0.712479 |
| 7453 | 10350173 | <a href="#">NM_011619</a>          | <a href="#">21956</a>     | troponin T2, cardiac              | <a href="#">Tnn2</a>               | 1.019 | 0.301  | 0.771643 | 0.905769 |
| 7454 | 10544248 |                                    |                           |                                   |                                    | 1.019 | 0.354  | 0.733185 | 0.885653 |
| 7455 | 10469503 |                                    |                           |                                   |                                    | 1.019 | 0.339  | 0.744487 | 0.891461 |
| 7456 | 10534889 | <a href="#">NM_178162</a>          | <a href="#">231801</a>    | HIV-1 Rev binding protein-like    | <a href="#">Hrbl</a>               | 1.019 | 0.59   | 0.573248 | 0.796645 |
| 7457 | 10500378 | <a href="#">BC115559</a>           | <a href="#">78373</a>     | nudix (nucleoside diphosphate     | <a href="#">Nudt17</a>             | 1.019 | 0.176  | 0.864795 | 0.946153 |
| 7458 | 10444911 | <a href="#">NM_001010833</a>       | <a href="#">240087</a>    | mediator of DNA damage<br>checkpo | <a href="#">Mdc1</a>               | 1.019 | -0.147 | 0.887337 | 0.955613 |
| 7459 | 10377255 | <a href="#">NM_018768</a>          | <a href="#">55943</a>     | syntaxin 8                        | <a href="#">Stx8</a>               | 1.019 | -0.617 | 0.556386 | 0.784857 |
| 7460 | 10567825 | <a href="#">NM_010689</a>          | <a href="#">16797</a>     | linker for activation of T cel    | <a href="#">Lat</a>                | 1.019 | 0.691  | 0.511093 | 0.752126 |
| 7461 | 10353844 | <a href="#">NM_153408</a>          | <a href="#">214854</a>    | lung-inducible neuralized-rela    | <a href="#">Liner</a>              | 1.019 | 0.141  | 0.891425 | 0.957571 |
| 7462 | 10430358 | <a href="#">NM_028331</a>          | <a href="#">72709</a>     | C1q and tumor necrosis factor     | <a href="#">C1qtnf6</a>            | 1.019 | 0.122  | 0.905979 | 0.963405 |
| 7463 | 10348376 | <a href="#">AK144378</a>           | <a href="#">381280</a>    | RIKEN cDNA 6430706D22<br>gene     | <a href="#">6430706D22Rik</a>      | 1.019 | 0.509  | 0.625706 | 0.829462 |
| 7464 | 10555875 | <a href="#">NM_147074</a>          | <a href="#">57250</a>     | olfactory receptor 653            | <a href="#">Olf653</a>             | 1.019 | 0.454  | 0.663103 | 0.849961 |
| 7465 | 10524909 | <a href="#">NM_008712</a>          | <a href="#">18125</a>     | nitric oxide synthase 1, neuro    | <a href="#">Nos1</a>               | 1.019 | 0.271  | 0.794169 | 0.916289 |
| 7466 | 10437132 |                                    |                           |                                   |                                    | 1.019 | 0.809  | 0.444186 | 0.702635 |
| 7467 | 10373626 | <a href="#">NM_146931</a>          | <a href="#">258933</a>    | olfactory receptor 796            | <a href="#">Olf796</a>             | 1.019 | 0.665  | 0.526985 | 0.762858 |
| 7468 | 10479274 | <a href="#">NM_009867</a>          | <a href="#">12561</a>     | cadherin 4                        | <a href="#">Cdh4</a>               | 1.019 | 0.557  | 0.594661 | 0.808846 |
| 7469 | 10533444 | <a href="#">ENSMUST00000100746</a> | <a href="#">75325</a>     | RIKEN cDNA 4930565B19<br>gene     | <a href="#">4930565B19Rik</a>      | 1.019 | 0.191  | 0.853528 | 0.940713 |
| 7470 | 10456488 |                                    |                           |                                   |                                    | 1.019 | -0.302 | 0.771457 | 0.905701 |
| 7471 | 10454398 | <a href="#">NM_001033532</a>       | <a href="#">225289</a>    | expressed sequence AW554918       | <a href="#">AW554918</a>           | 1.019 | 0.2    | 0.846981 | 0.938064 |
| 7472 | 10485635 | <a href="#">NM_145380</a>          | <a href="#">98221</a>     | eukaryotic translation initiat    | <a href="#">Eif3m</a>              | 1.019 | -0.004 | 0.996918 | 0.99884  |
| 7473 | 10568038 | <a href="#">AK035633</a>           | <a href="#">100038751</a> | predicted gene,<br>ENSMUSG0000005 | <a href="#">ENSMUSG00000055323</a> | 1.019 | 0.499  | 0.632964 | 0.833181 |
| 7474 | 10421456 | <a href="#">NM_023045</a>          | <a href="#">65246</a>     | exportin 7                        | <a href="#">Xpo7</a>               | 1.019 | 0.089  | 0.931318 | 0.972759 |
| 7475 | 10529311 | <a href="#">AK144327</a>           | <a href="#">100048901</a> | predicted gene,<br>ENSMUSG0000007 | <a href="#">ENSMUSG00000073039</a> | 1.019 | 0.322  | 0.756494 | 0.897871 |
| 7476 | 10471533 |                                    |                           |                                   |                                    | 1.019 | 0.727  | 0.49023  | 0.737262 |
| 7477 | 10345091 | <a href="#">NM_172124</a>          | <a href="#">280645</a>    | beta-1,3-glucuronyltransferase    | <a href="#">B3gat2</a>             | 1.019 | 0.381  | 0.714139 | 0.874842 |
| 7478 | 10550222 | <a href="#">NM_001099277</a>       | <a href="#">666528</a>    | zinc finger protein 541           | <a href="#">Zfp541</a>             | 1.019 | 0.485  | 0.642308 | 0.838072 |
| 7479 | 10574018 | <a href="#">NM_013603</a>          | <a href="#">17751</a>     | metallothionein 3                 | <a href="#">Mt3</a>                | 1.019 | 0.506  | 0.628261 | 0.830922 |
| 7480 | 10394054 | <a href="#">NM_009854</a>          | <a href="#">12516</a>     | CD7 antigen                       | <a href="#">Cd7</a>                | 1.019 | 0.357  | 0.731121 | 0.883967 |
| 7481 | 10465861 | <a href="#">NM_016692</a>          | <a href="#">16319</a>     | inner centromere protein          | <a href="#">Incenp</a>             | 1.019 | 0.273  | 0.792308 | 0.915409 |
| 7482 | 10475932 | <a href="#">NM_024237</a>          | <a href="#">70370</a>     | fibulin 7                         | <a href="#">Fbln7</a>              | 1.019 | 0.175  | 0.866173 | 0.946491 |
| 7483 | 10450874 | <a href="#">NM_146834</a>          | <a href="#">258831</a>    | olfactory receptor 101            | <a href="#">Olf101</a>             | 1.019 | 0.089  | 0.931675 | 0.972759 |
| 7484 | 10523693 | <a href="#">NM_016779</a>          | <a href="#">13406</a>     | dentin matrix protein 1           | <a href="#">Dmp1</a>               | 1.019 | 0.345  | 0.739745 | 0.889275 |

|      |          |                                    |                        |                                |                               |       |        |          |          |
|------|----------|------------------------------------|------------------------|--------------------------------|-------------------------------|-------|--------|----------|----------|
| 7485 | 10491704 | <a href="#">NM_021343</a>          | <a href="#">57815</a>  | spermatogenesis associated 5   | <a href="#">Spata5</a>        | 1.019 | 0.067  | 0.948502 | 0.980098 |
| 7486 | 10362837 | <a href="#">NM_153055</a>          | <a href="#">140740</a> | SEC63-like (S. cerevisiae)     | <a href="#">Sec63</a>         | 1.019 | 0.202  | 0.8455   | 0.937284 |
| 7487 | 10552668 | <a href="#">NM_198250</a>          | <a href="#">272381</a> | leucine rich repeat containing | <a href="#">Lrrc4b</a>        | 1.019 | 0.219  | 0.832574 | 0.932679 |
| 7488 | 10382321 | <a href="#">NM_008425</a>          | <a href="#">16518</a>  | potassium inwardly-rectifying  | <a href="#">Kcnj2</a>         | 1.019 | 0.176  | 0.864878 | 0.946153 |
| 7489 | 10448925 | <a href="#">NM_021415</a>          | <a href="#">58226</a>  | calcium channel, voltage-depen | <a href="#">Cacna1h</a>       | 1.019 | -0.109 | 0.916393 | 0.966925 |
| 7490 | 10494500 | <a href="#">NM_001081139</a>       | <a href="#">213121</a> | ankyrin repeat domain 35       | <a href="#">Ankrd35</a>       | 1.019 | 0.451  | 0.665239 | 0.850823 |
| 7491 | 10363281 | <a href="#">NM_011240</a>          | <a href="#">19386</a>  | RAN binding protein 2          | <a href="#">Ranbp2</a>        | 1.019 | 0.254  | 0.806517 | 0.921832 |
| 7492 | 10425801 | <a href="#">NM_007546</a>          | <a href="#">12124</a>  | Bcl2-interacting killer        | <a href="#">Bik</a>           | 1.019 | 0.104  | 0.920062 | 0.968088 |
| 7493 | 10507580 | <a href="#">NM_133892</a>          | <a href="#">100470</a> | L-amino acid oxidase 1         | <a href="#">Lao1</a>          | 1.019 | 0.513  | 0.623422 | 0.827888 |
| 7494 | 10593966 | <a href="#">NM_007783</a>          | <a href="#">12988</a>  | c-src tyrosine kinase          | <a href="#">Csk</a>           | 1.019 | -0.424 | 0.683607 | 0.859974 |
| 7495 | 10563338 | <a href="#">NM_008654</a>          | <a href="#">17872</a>  | myeloid differentiation primar | <a href="#">Myd116</a>        | 1.019 | 0.037  | 0.971593 | 0.988148 |
| 7496 | 10425430 | <a href="#">NM_144812</a>          | <a href="#">213988</a> | trinucleotide repeat containin | <a href="#">Tnrc6b</a>        | 1.019 | 0.49   | 0.638823 | 0.835923 |
| 7497 | 10410309 |                                    |                        |                                |                               | 1.019 | 0.91   | 0.392328 | 0.660367 |
| 7498 | 10509273 | <a href="#">ENSMUST00000097840</a> | <a href="#">22417</a>  | wingless-related MMTV integrat | <a href="#">Wnt4</a>          | 1.019 | 0.448  | 0.667131 | 0.851389 |
| 7499 | 10420837 | <a href="#">NM_018788</a>          | <a href="#">54616</a>  | exostosins (multiple)-like 3   | <a href="#">Extl3</a>         | 1.019 | -0.036 | 0.972615 | 0.988226 |
| 7500 | 10389025 | <a href="#">NM_177390</a>          | <a href="#">338367</a> | myosin ID                      | <a href="#">Myo1d</a>         | 1.019 | -0.536 | 0.607917 | 0.817473 |
| 7501 | 10495255 |                                    |                        |                                |                               | 1.019 | 0.368  | 0.723745 | 0.880392 |
| 7502 | 10363137 | <a href="#">NM_030250</a>          | <a href="#">52014</a>  | nuclear undecaprenyl pyrophosp | <a href="#">Nus1</a>          | 1.019 | -0.004 | 0.996592 | 0.998765 |
| 7503 | 10369690 | <a href="#">ENSMUST00000099674</a> | <a href="#">52463</a>  | tet oncogene 1                 | <a href="#">Tet1</a>          | 1.019 | -0.118 | 0.909068 | 0.963765 |
| 7504 | 10429222 | <a href="#">BC125645</a>           | <a href="#">70363</a>  | RIKEN cDNA 1700010C24 gene     | <a href="#">1700010C24Rik</a> | 1.019 | 0.786  | 0.45678  | 0.712642 |
| 7505 | 10523182 | <a href="#">NM_009704</a>          | <a href="#">11839</a>  | amphiregulin                   | <a href="#">Areg</a>          | 1.019 | 0.373  | 0.719854 | 0.878078 |
| 7506 | 10546884 | <a href="#">NM_177763</a>          | <a href="#">269788</a> | lipoma HMGIC fusion partner-li | <a href="#">Lhfpl4</a>        | 1.019 | 1.062  | 0.322531 | 0.599294 |
| 7507 | 10480421 | <a href="#">AK015028</a>           | <a href="#">319264</a> | RIKEN cDNA A130006I12 gene     | <a href="#">A130006I12Rik</a> | 1.019 | 0.392  | 0.706701 | 0.871943 |
| 7508 | 10360761 | <a href="#">ENSMUST00000070987</a> | <a href="#">433384</a> | predicted gene, EG433384       | <a href="#">EG433384</a>      | 1.019 | 0.295  | 0.776089 | 0.908617 |
| 7509 | 10537410 | <a href="#">NM_011539</a>          | <a href="#">21391</a>  | thromboxane A synthase 1, plat | <a href="#">Tbxas1</a>        | 1.019 | -0.036 | 0.972362 | 0.98815  |
| 7510 | 10598882 | <a href="#">NM_009457</a>          | <a href="#">22201</a>  | ubiquitin-like modifier activa | <a href="#">Uba1</a>          | 1.019 | 0.006  | 0.995402 | 0.998188 |
| 7511 | 10591626 | <a href="#">NM_177030</a>          | <a href="#">319899</a> | dedicator of cytokinesis 6     | <a href="#">Dock6</a>         | 1.019 | 0.477  | 0.647277 | 0.841078 |
| 7512 | 10390969 | <a href="#">ENSMUST00000073890</a> | <a href="#">16671</a>  | keratin 33B                    | <a href="#">Krt33b</a>        | 1.019 | 0.703  | 0.503824 | 0.746156 |
| 7513 | 10387029 | <a href="#">NM_001099633</a>       | <a href="#">237806</a> | dynein, axonemal, heavy chain  | <a href="#">Dnahe9</a>        | 1.019 | 0.584  | 0.576826 | 0.797672 |
| 7514 | 10396205 | <a href="#">NM_001081195</a>       | <a href="#">238247</a> | AT rich interactive domain 4A  | <a href="#">Arid4a</a>        | 1.019 | -0.039 | 0.970287 | 0.987901 |
| 7515 | 10584518 | <a href="#">NM_147107</a>          | <a href="#">259111</a> | olfactory receptor 974         | <a href="#">Olfr974</a>       | 1.019 | 0.044  | 0.965805 | 0.98633  |
| 7516 | 10397450 | <a href="#">NM_177354</a>          | <a href="#">238328</a> | vasohibin 1                    | <a href="#">Vash1</a>         | 1.019 | 0.36   | 0.729304 | 0.88278  |
| 7517 | 10369586 | <a href="#">NM_181423</a>          | <a href="#">338359</a> | suppressor of var1, 3-like 1 ( | <a href="#">Supv3l1</a>       | 1.019 | -0.19  | 0.854547 | 0.94107  |
| 7518 | 10450006 | <a href="#">NM_029804</a>          | <a href="#">76936</a>  | heterogeneous nuclear ribonucl | <a href="#">Hnrpm</a>         | 1.019 | 0.257  | 0.804006 | 0.920506 |
| 7519 | 10439695 | <a href="#">NM_019754</a>          | <a href="#">56370</a>  | transgelin 3                   | <a href="#">Tagln3</a>        | 1.019 | 0.047  | 0.963433 | 0.985684 |
| 7520 | 10462091 | <a href="#">NM_010638</a>          | <a href="#">16601</a>  | Kruppel-like factor 9          | <a href="#">Klf9</a>          | 1.019 | 0.279  | 0.788241 | 0.913849 |
| 7521 | 10463486 | <a href="#">NM_001037758</a>       | <a href="#">12234</a>  | beta-transducin repeat contain | <a href="#">Btrc</a>          | 1.019 | -0.183 | 0.859465 | 0.943578 |
| 7522 | 10388298 | <a href="#">NM_147003</a>          | <a href="#">259005</a> | olfactory receptor 139         | <a href="#">Olfr139</a>       | 1.019 | 0.478  | 0.646815 | 0.840789 |
| 7523 | 10573451 | <a href="#">NM_027954</a>          | <a href="#">71846</a>  | synaptonemal complex central e | <a href="#">Syce2</a>         | 1.019 | -0.471 | 0.651677 | 0.844083 |
| 7524 | 10385814 | <a href="#">NM_153069</a>          | <a href="#">259301</a> | liver-expressed antimicrobial  | <a href="#">Leap2</a>         | 1.019 | 0.216  | 0.834905 | 0.933323 |
| 7525 | 10546960 |                                    |                        |                                |                               | 1.018 | -0.2   | 0.847238 | 0.938167 |
| 7526 | 10580382 | <a href="#">NM_001081324</a>       | <a href="#">74513</a>  | neuropilin (NRP) and tolloid ( | <a href="#">Neto2</a>         | 1.018 | -0.067 | 0.948578 | 0.980098 |
| 7527 | 10421351 | <a href="#">NM_025945</a>          | <a href="#">67065</a>  | polymerase (RNA) III (DNA dire | <a href="#">Polr3d</a>        | 1.018 | 0.152  | 0.883688 | 0.954177 |
| 7528 | 10528630 | <a href="#">NM_177676</a>          | <a href="#">231045</a> | RIKEN cDNA 4931409K22 gene     | <a href="#">4931409K22Rik</a> | 1.018 | 0.706  | 0.50253  | 0.745467 |
| 7529 | 10576971 | <a href="#">NM_001081212</a>       | <a href="#">384783</a> | insulin receptor substrate 2   | <a href="#">Irs2</a>          | 1.018 | -0.239 | 0.817772 | 0.927527 |
| 7530 | 10603811 | <a href="#">BC049702</a>           | <a href="#">278255</a> | cDNA sequence BC049702         | <a href="#">BC049702</a>      | 1.018 | 0.127  | 0.902556 | 0.961829 |
| 7531 | 10574059 | <a href="#">NM_019415</a>          | <a href="#">20497</a>  | solute carrier family 12, memb | <a href="#">Slc12a3</a>       | 1.018 | 0.529  | 0.612754 | 0.820472 |
| 7532 | 10462501 | <a href="#">ENSMUST00000025824</a> | <a href="#">67188</a>  | RIKEN cDNA 2700046G09 gene     | <a href="#">2700046G09Rik</a> | 1.018 | 0.062  | 0.952033 | 0.981385 |
| 7533 | 10394366 | <a href="#">NM_001099628</a>       | <a href="#">320817</a> | ATPase family, AAA domain cont | <a href="#">Atad2b</a>        | 1.018 | 0.292  | 0.778191 | 0.909741 |
| 7534 | 10513008 | <a href="#">NM_010637</a>          | <a href="#">16600</a>  | Kruppel-like factor 4 (gut)    | <a href="#">Klf4</a>          | 1.018 | 0.467  | 0.654334 | 0.845158 |
| 7535 | 10580957 | <a href="#">NM_172758</a>          | <a href="#">234595</a> | solute carrier family 38, memb | <a href="#">Slc38a7</a>       | 1.018 | 0.345  | 0.739851 | 0.889275 |
| 7536 | 10541771 | <a href="#">NM_133345</a>          | <a href="#">28019</a>  | inhibitor of growth family, me | <a href="#">Ing4</a>          | 1.018 | 0.247  | 0.811705 | 0.923946 |
| 7537 | 10566159 | <a href="#">NM_207621</a>          | <a href="#">233578</a> | olfactory receptor 553         | <a href="#">Olfr553</a>       | 1.018 | 0.333  | 0.748536 | 0.893578 |

|      |          |                                    |                        |                                |                                    |       |        |          |          |
|------|----------|------------------------------------|------------------------|--------------------------------|------------------------------------|-------|--------|----------|----------|
| 7538 | 10418901 | <a href="#">ENSMUS100000063572</a> | <a href="#">432839</a> | G protein regulated inducer of | <a href="#">Gprin2</a>             | 1.018 | 0.847  | 0.4244   | 0.686521 |
| 7539 | 10450895 | <a href="#">NM_146287</a>          | <a href="#">258284</a> | olfactory receptor 114         | <a href="#">Olfr114</a>            | 1.018 | -0.045 | 0.965121 | 0.986124 |
| 7540 | 10404593 |                                    |                        |                                |                                    | 1.018 | 0.597  | 0.568514 | 0.793239 |
| 7541 | 10596222 | <a href="#">NM_145700</a>          | <a href="#">252837</a> | chemokine (C-C motif) receptor | <a href="#">Ccr1</a>               | 1.018 | 0.693  | 0.510043 | 0.751325 |
| 7542 | 10509441 | <a href="#">NM_199307</a>          | <a href="#">230857</a> | endothelin converting enzyme 1 | <a href="#">Ece1</a>               | 1.018 | -0.31  | 0.765419 | 0.902421 |
| 7543 | 10380976 | <a href="#">NM_021347</a>          | <a href="#">57911</a>  | gasdermin A1                   | <a href="#">Gsdma1</a>             | 1.018 | 0.088  | 0.932274 | 0.973077 |
| 7544 | 10508142 | <a href="#">NM_199473</a>          | <a href="#">329941</a> | collagen, type VIII, alpha 2   | <a href="#">Col8a2</a>             | 1.018 | 0.113  | 0.912775 | 0.965173 |
| 7545 | 10426656 | <a href="#">NM_013639</a>          | <a href="#">19132</a>  | peripherin                     | <a href="#">Prph</a>               | 1.018 | -0.143 | 0.889979 | 0.956731 |
| 7546 | 10539449 | <a href="#">NM_134157</a>          | <a href="#">110935</a> | ATPase, H+ transporting, lysos | <a href="#">Atp6v1b1</a>           | 1.018 | 0.323  | 0.755572 | 0.897366 |
| 7547 | 10414548 | <a href="#">NM_030098</a>          | <a href="#">78416</a>  | ribonuclease, RNase A family,  | <a href="#">Rnase6</a>             | 1.018 | -0.051 | 0.960786 | 0.985069 |
| 7548 | 10600786 | <a href="#">NM_001039060</a>       | <a href="#">236904</a> | kelch-like 15 (Drosophila)     | <a href="#">Klhl15</a>             | 1.018 | 0.515  | 0.622109 | 0.827029 |
| 7549 | 10572485 | <a href="#">NM_009001</a>          | <a href="#">19339</a>  | RAB3A, member RAS oncogene fam | <a href="#">Rab3a</a>              | 1.018 | 0.361  | 0.728702 | 0.882456 |
| 7550 | 10506569 | <a href="#">BC030081</a>           | <a href="#">329908</a> | ubiquitin specific peptidase 2 | <a href="#">Usp24</a>              | 1.018 | -0.342 | 0.741981 | 0.889973 |
| 7551 | 10534667 | <a href="#">NM_008871</a>          | <a href="#">18787</a>  | serine (or cysteine) peptidase | <a href="#">Serpine1</a>           | 1.018 | 0.399  | 0.701678 | 0.869143 |
| 7552 | 10391339 | <a href="#">NM_008949</a>          | <a href="#">19183</a>  | proteasome (prosome, macropain | <a href="#">Psmc3ip</a>            | 1.018 | 0.098  | 0.924937 | 0.970324 |
| 7553 | 10588893 | <a href="#">NM_016802</a>          | <a href="#">11848</a>  | ras homolog gene family, membe | <a href="#">Rhoa</a>               | 1.018 | 0.302  | 0.771323 | 0.905701 |
| 7554 | 10533003 | <a href="#">BC061108</a>           | <a href="#">66123</a>  | RIKEN cDNA 1110006O24 gene     | <a href="#">1110006O24Rik</a>      | 1.018 | 0.609  | 0.561422 | 0.788542 |
| 7555 | 10409311 |                                    |                        |                                |                                    | 1.018 | 0.474  | 0.649453 | 0.84256  |
| 7556 | 10508115 | <a href="#">NM_028800</a>          | <a href="#">74178</a>  | serine/threonine kinase 40     | <a href="#">Stk40</a>              | 1.018 | -0.096 | 0.925982 | 0.970758 |
| 7557 | 10348201 | <a href="#">NM_146112</a>          | <a href="#">227331</a> | GRB10 interacting GYF protein  | <a href="#">Gigyf2</a>             | 1.018 | 0.031  | 0.976281 | 0.990137 |
| 7558 | 10468421 | <a href="#">NM_001001738</a>       | <a href="#">414801</a> | cDNA sequence BC063749         | <a href="#">BC063749</a>           | 1.018 | 0.226  | 0.827574 | 0.93066  |
| 7559 | 10479077 | <a href="#">NM_019806</a>          | <a href="#">56491</a>  | vesicle-associated membrane pr | <a href="#">Vapb</a>               | 1.018 | 0.131  | 0.899057 | 0.960129 |
| 7560 | 10371464 | <a href="#">AK038758</a>           | <a href="#">791330</a> | predicted gene, ENSMUSG0000005 | <a href="#">ENSMUSG00000055288</a> | 1.018 | -0.042 | 0.967425 | 0.987082 |
| 7561 | 10580085 | <a href="#">BC057552</a>           | <a href="#">212123</a> | cDNA sequence BC057552         | <a href="#">BC057552</a>           | 1.018 | 0.157  | 0.879913 | 0.952396 |
| 7562 | 10414003 | <a href="#">XM_985917</a>          | <a href="#">268729</a> | gene model 626, (NCBI)         | <a href="#">Gm626</a>              | 1.018 | 0.625  | 0.550954 | 0.781103 |
| 7563 | 10427063 | <a href="#">BC048463</a>           | <a href="#">66322</a>  | RIKEN cDNA 1700011A15 gene     | <a href="#">1700011A15Rik</a>      | 1.018 | 0.359  | 0.730033 | 0.883264 |
| 7564 | 10361635 | <a href="#">NM_001033466</a>       | <a href="#">381990</a> | zinc finger and BTB domain con | <a href="#">Zbtb2</a>              | 1.018 | 0.05   | 0.961665 | 0.985234 |
| 7565 | 10603796 | <a href="#">BC118515</a>           | <a href="#">75905</a>  | RIKEN cDNA 4930578C19 gene     | <a href="#">4930578C19Rik</a>      | 1.018 | -0.122 | 0.906583 | 0.963405 |
| 7566 | 10574375 |                                    |                        |                                |                                    | 1.018 | 0.293  | 0.777568 | 0.909562 |
| 7567 | 10581036 | <a href="#">NM_021028</a>          | <a href="#">57813</a>  | thymidine kinase 2, mitochondr | <a href="#">Tk2</a>                | 1.018 | 0.623  | 0.552216 | 0.782016 |
| 7568 | 10497711 |                                    |                        |                                |                                    | 1.018 | -0.219 | 0.832906 | 0.932703 |
| 7569 | 10377245 | <a href="#">NM_001013013</a>       | <a href="#">68460</a>  | dehydrogenase/reductase (SDR f | <a href="#">Dhrs7c</a>             | 1.018 | 1.036  | 0.333636 | 0.609432 |
| 7570 | 10353533 | <a href="#">NM_028534</a>          | <a href="#">98366</a>  | stromal membrane-associated pr | <a href="#">Smap1</a>              | 1.018 | 0.011  | 0.991608 | 0.99665  |
| 7571 | 10535881 |                                    |                        |                                |                                    | 1.018 | 0.769  | 0.466296 | 0.719571 |
| 7572 | 10552622 | <a href="#">BC059896</a>           | <a href="#">66976</a>  | RIKEN cDNA 2410002F23 gene     | <a href="#">2410002F23Rik</a>      | 1.018 | 0.235  | 0.820577 | 0.928617 |
| 7573 | 10602733 |                                    |                        |                                |                                    | 1.018 | 0.02   | 0.984745 | 0.993532 |
| 7574 | 10509280 | <a href="#">NM_008305</a>          | <a href="#">15530</a>  | perlecan (heparan sulfate prot | <a href="#">Hspg2</a>              | 1.018 | 0.42   | 0.686419 | 0.861515 |
| 7575 | 10409424 | <a href="#">NM_016662</a>          | <a href="#">17121</a>  | Max dimerization protein 3     | <a href="#">Mxd3</a>               | 1.018 | 0.343  | 0.74108  | 0.889595 |
| 7576 | 10486988 | <a href="#">NM_145395</a>          | <a href="#">213696</a> | dual oxidase maturation factor | <a href="#">Duoxa1</a>             | 1.018 | 0.62   | 0.554211 | 0.783409 |
| 7577 | 10514405 | <a href="#">NM_172695</a>          | <a href="#">18786</a>  | phospholipase A2, activating p | <a href="#">Pla2</a>               | 1.018 | 0.09   | 0.931116 | 0.972759 |
| 7578 | 10461840 | <a href="#">NM_001011850</a>       | <a href="#">258151</a> | olfactory receptor 1505        | <a href="#">Olfr1505</a>           | 1.018 | 0.385  | 0.711437 | 0.873563 |
| 7579 | 10591253 | <a href="#">AK081787</a>           | <a href="#">77519</a>  | RIKEN cDNA 5730601F06 gene     | <a href="#">5730601F06Rik</a>      | 1.018 | 0.059  | 0.954179 | 0.982421 |
| 7580 | 10549569 | <a href="#">NM_146176</a>          | <a href="#">232791</a> | CCR4-NOT transcription complex | <a href="#">Cnot3</a>              | 1.017 | -0.076 | 0.941123 | 0.977122 |
| 7581 | 10386951 | <a href="#">NM_018805</a>          | <a href="#">54710</a>  | heparan sulfate (glucosamine)  | <a href="#">Hs3st3b1</a>           | 1.017 | 0.026  | 0.980126 | 0.991919 |
| 7582 | 10347860 |                                    |                        |                                |                                    | 1.017 | 0.332  | 0.749199 | 0.893965 |
| 7583 | 10419872 | <a href="#">ENSMUST00000100563</a> | <a href="#">105651</a> | protein phosphatase 1, regulat | <a href="#">Ppp1r3e</a>            | 1.017 | 0.256  | 0.804799 | 0.921015 |
| 7584 | 10566430 | <a href="#">NM_001011857</a>       | <a href="#">258160</a> | olfactory receptor 685         | <a href="#">Olfr685</a>            | 1.017 | 0.29   | 0.779859 | 0.910713 |
| 7585 | 10583508 | <a href="#">NM_023167</a>          | <a href="#">66163</a>  | mitochondrial ribosomal protei | <a href="#">Mrpl4</a>              | 1.017 | 0.269  | 0.795794 | 0.917013 |
| 7586 | 10377439 | <a href="#">NM_011065</a>          | <a href="#">18626</a>  | period homolog 1 (Drosophila)  | <a href="#">Per1</a>               | 1.017 | 0.538  | 0.607074 | 0.817118 |
| 7587 | 10499045 | <a href="#">NM_030706</a>          | <a href="#">80890</a>  | tripartite motif-containing 2  | <a href="#">Trim2</a>              | 1.017 | 0.073  | 0.943667 | 0.977948 |
| 7588 | 10377605 | <a href="#">BC117077</a>           | <a href="#">69186</a>  | RIKEN cDNA 1810027O10 gene     | <a href="#">1810027O10Rik</a>      | 1.017 | -0.193 | 0.852515 | 0.940498 |
| 7589 | 10527646 | <a href="#">AK030804</a>           | <a href="#">70717</a>  | RIKEN cDNA 6330406I15 gene     | <a href="#">6330406I15Rik</a>      | 1.017 | 0.345  | 0.73993  | 0.889278 |

|      |          |                                    |                           |                                   |                                    |       |        |          |          |
|------|----------|------------------------------------|---------------------------|-----------------------------------|------------------------------------|-------|--------|----------|----------|
| 7590 | 10596014 | <a href="#">NM_019815</a>          | <a href="#">56492</a>     | claudin 18                        | <a href="#">Cldn18</a>             | 1.017 | 0.264  | 0.799377 | 0.919009 |
| 7591 | 10479154 | <a href="#">NM_001080971</a>       | <a href="#">545486</a>    | tubulin, beta 1                   | <a href="#">Tubb1</a>              | 1.017 | 0.159  | 0.877785 | 0.951715 |
| 7592 | 10510708 | <a href="#">NM_133788</a>          | <a href="#">57295</a>     | isoprenylcysteine carboxyl met    | <a href="#">Icmt</a>               | 1.017 | 0.303  | 0.770398 | 0.905061 |
| 7593 | 10415721 |                                    |                           |                                   |                                    | 1.017 | 0.47   | 0.651986 | 0.844083 |
| 7594 | 10481525 | <a href="#">NM_144884</a>          | <a href="#">30931</a>     | torsin family 1, member A (tor    | <a href="#">Tor1a</a>              | 1.017 | 0.069  | 0.946623 | 0.978837 |
| 7595 | 10562073 | <a href="#">NM_133693</a>          | <a href="#">68035</a>     | RNA binding motif protein 42      | <a href="#">Rbm42</a>              | 1.017 | -0.233 | 0.82195  | 0.92863  |
| 7596 | 10555256 | <a href="#">ENSMUST00000098265</a> | <a href="#">100038557</a> | predicted gene,<br>ENSMUSG0000007 | <a href="#">ENSMUSG00000073999</a> | 1.017 | 0.085  | 0.934707 | 0.974001 |
| 7597 | 10513016 | <a href="#">NM_025271</a>          | <a href="#">11471</a>     | actin-like 7b                     | <a href="#">Actl7b</a>             | 1.017 | -0.278 | 0.788818 | 0.914061 |
| 7598 | 10546417 | <a href="#">NM_009426</a>          | <a href="#">22044</a>     | thyrotropin releasing hormone     | <a href="#">Trh</a>                | 1.017 | 0.516  | 0.621239 | 0.826183 |
| 7599 | 10581547 | <a href="#">NM_026277</a>          | <a href="#">67619</a>     | NIN1/RPN12 binding protein 1 h    | <a href="#">Nob1</a>               | 1.017 | 0.115  | 0.911225 | 0.964566 |
| 7600 | 10469058 | <a href="#">EF529510</a>           | <a href="#">68527</a>     | RIKEN cDNA 1110017116 gene        | <a href="#">1110017116Rik</a>      | 1.017 | 0.65   | 0.536082 | 0.769315 |
| 7601 | 10480804 | <a href="#">NM_029293</a>          | <a href="#">75454</a>     | phosphohistidine phosphatase 1    | <a href="#">Phpt1</a>              | 1.017 | -0.102 | 0.921718 | 0.968773 |
| 7602 | 10495223 | <a href="#">NM_133867</a>          | <a href="#">99662</a>     | ESP8-like 3                       | <a href="#">Eps8l3</a>             | 1.017 | 0.479  | 0.645895 | 0.840161 |
| 7603 | 10464905 | <a href="#">NM_153553</a>          | <a href="#">225872</a>    | neuronal PAS domain protein 4     | <a href="#">Npas4</a>              | 1.017 | 0.368  | 0.72375  | 0.880392 |
| 7604 | 10370522 | <a href="#">NM_009809</a>          | <a href="#">12365</a>     | caspase 14                        | <a href="#">Casp14</a>             | 1.017 | 0.204  | 0.844339 | 0.936805 |
| 7605 | 10386007 | <a href="#">NM_172258</a>          | <a href="#">215332</a>    | solute carrier family 36 (prot    | <a href="#">Slc36a3</a>            | 1.017 | 0.633  | 0.546205 | 0.777655 |
| 7606 | 10530847 | <a href="#">BC132661</a>           | <a href="#">231332</a>    | phosphoprotein enriched in ast    | <a href="#">Pea15b</a>             | 1.017 | 0.751  | 0.476695 | 0.727638 |
| 7607 | 10513006 |                                    |                           |                                   |                                    | 1.017 | -0.234 | 0.821565 | 0.92863  |
| 7608 | 10587226 | <a href="#">NM_027309</a>          | <a href="#">70082</a>     | LysM, putative peptidoglycan-b    | <a href="#">Lysmd2</a>             | 1.017 | 0.097  | 0.925605 | 0.970543 |
| 7609 | 10581961 | <a href="#">NM_172466</a>          | <a href="#">208936</a>    | a disintegrin-like and metallo    | <a href="#">Adamts18</a>           | 1.017 | -0.088 | 0.932646 | 0.973153 |
| 7610 | 10572332 | <a href="#">NM_172755</a>          | <a href="#">234373</a>    | splicing factor, arginine/seri    | <a href="#">Sfrs14</a>             | 1.017 | 0.106  | 0.918171 | 0.967805 |
| 7611 | 10417212 | <a href="#">NM_145467</a>          | <a href="#">223272</a>    | integrin, beta-like 1             | <a href="#">Itgbl1</a>             | 1.017 | 0.749  | 0.477485 | 0.728235 |
| 7612 | 10541061 | <a href="#">NM_146912</a>          | <a href="#">258914</a>    | olfactory receptor 211            | <a href="#">Olf211</a>             | 1.017 | 0.415  | 0.690038 | 0.863987 |
| 7613 | 10453721 | <a href="#">NM_153085</a>          | <a href="#">225131</a>    | WW domain containing adaptor<br>w | <a href="#">Wac</a>                | 1.017 | 0.218  | 0.8334   | 0.932893 |
| 7614 | 10345626 | <a href="#">NM_198303</a>          | <a href="#">226982</a>    | eukaryotic translation initiat    | <a href="#">Eif5b</a>              | 1.017 | -0.072 | 0.944894 | 0.978204 |
| 7615 | 10556611 |                                    |                           |                                   |                                    | 1.017 | 0.214  | 0.836328 | 0.933896 |
| 7616 | 10563766 | <a href="#">XM_001474703</a>       | <a href="#">639116</a>    | predicted gene, EG639116          | <a href="#">EG639116</a>           | 1.017 | 0.312  | 0.763984 | 0.90173  |
| 7617 | 10404815 | <a href="#">NM_178848</a>          | <a href="#">68346</a>     | sirtuin 5 (silent mating type     | <a href="#">Sirt5</a>              | 1.017 | -0.047 | 0.963436 | 0.985684 |
| 7618 | 10469957 | <a href="#">BC089508</a>           | <a href="#">97031</a>     | RIKEN cDNA C430004E15<br>gene     | <a href="#">C430004E15Rik</a>      | 1.017 | 0.164  | 0.874033 | 0.949893 |
| 7619 | 10552252 | <a href="#">NM_001085385</a>       | <a href="#">72244</a>     | RIKEN cDNA 1600014C10<br>gene     | <a href="#">1600014C10Rik</a>      | 1.017 | -0.483 | 0.64317  | 0.838317 |
| 7620 | 10596960 | <a href="#">NM_001012236</a>       | <a href="#">22040</a>     | three prime repair exonuclease    | <a href="#">Trex1</a>              | 1.017 | 0.2    | 0.84714  | 0.938142 |
| 7621 | 10556165 | <a href="#">NM_146723</a>          | <a href="#">258718</a>    | olfactory receptor 513            | <a href="#">Olf513</a>             | 1.017 | 1.034  | 0.334482 | 0.60995  |
| 7622 | 10459241 | <a href="#">NM_178928</a>          | <a href="#">106877</a>    | actin filament associated prot    | <a href="#">Afap1l1</a>            | 1.017 | 0.411  | 0.693027 | 0.865443 |
| 7623 | 10371092 | <a href="#">NM_178662</a>          | <a href="#">16467</a>     | ataxia, cerebellar, Cayman typ    | <a href="#">Atcay</a>              | 1.017 | 0.206  | 0.84281  | 0.936326 |
| 7624 | 10457040 | <a href="#">NM_183033</a>          | <a href="#">329003</a>    | zinc finger protein 516           | <a href="#">Zfp516</a>             | 1.017 | 0.473  | 0.649929 | 0.84297  |
| 7625 | 10562670 | <a href="#">NM_027264</a>          | <a href="#">69930</a>     | zinc finger protein 715           | <a href="#">Zfp715</a>             | 1.017 | -0.209 | 0.840195 | 0.93535  |
| 7626 | 10554349 |                                    |                           |                                   |                                    | 1.017 | 0.391  | 0.707376 | 0.872175 |
| 7627 | 10548884 | <a href="#">NM_026983</a>          | <a href="#">69187</a>     | endoplasmic reticulum protein     | <a href="#">Erp27</a>              | 1.017 | 0.818  | 0.43945  | 0.698732 |
| 7628 | 10551077 | <a href="#">BC022632</a>           | <a href="#">77124</a>     | RIKEN cDNA 9130221H12<br>gene     | <a href="#">9130221H12Rik</a>      | 1.017 | 0.051  | 0.9605   | 0.985069 |
| 7629 | 10406203 | <a href="#">XR_033696</a>          | <a href="#">434490</a>    | similar to stomatin-like prote    | <a href="#">LOC434490</a>          | 1.017 | -0.179 | 0.862959 | 0.945293 |
| 7630 | 10490653 | <a href="#">NM_198169</a>          | <a href="#">229004</a>    | glucocorticoid modulatory elem    | <a href="#">Gmeb2</a>              | 1.017 | 0.18   | 0.861827 | 0.94442  |
| 7631 | 10569611 | <a href="#">NM_010175</a>          | <a href="#">14082</a>     | Fas (TNFRSF6)-associated via d    | <a href="#">Fadd</a>               | 1.017 | 0.209  | 0.840112 | 0.935328 |
| 7632 | 10390923 | <a href="#">NM_026807</a>          | <a href="#">68673</a>     | RIKEN cDNA 1110033F04 gene        | <a href="#">1110033F04Rik</a>      | 1.017 | 0.394  | 0.705186 | 0.871395 |
| 7633 | 10574417 | <a href="#">XR_032458</a>          | <a href="#">333331</a>    | similar to medium-chain acyl-C    | <a href="#">LOC333331</a>          | 1.017 | 0.386  | 0.710348 | 0.873031 |
| 7634 | 10495929 |                                    |                           |                                   |                                    | 1.017 | -0.001 | 0.998951 | 0.999589 |
| 7635 | 10474998 |                                    |                           |                                   |                                    | 1.017 | 0.367  | 0.724096 | 0.88046  |
| 7636 | 10460891 | <a href="#">NM_009006</a>          | <a href="#">26412</a>     | mitogen-activated protein kina    | <a href="#">Map4k2</a>             | 1.017 | 0.411  | 0.692933 | 0.865409 |
| 7637 | 10515974 | <a href="#">NM_008692</a>          | <a href="#">18046</a>     | nuclear transcription factor -Y   | <a href="#">Nfyce</a>              | 1.017 | 0.543  | 0.603198 | 0.814484 |
| 7638 | 10398936 | <a href="#">NM_001081170</a>       | <a href="#">217893</a>    | phosphofurin acidic cluster so    | <a href="#">Pacs2</a>              | 1.017 | 0.035  | 0.972704 | 0.988268 |
| 7639 | 10448350 | <a href="#">NM_023824</a>          | <a href="#">76498</a>     | progesterin and adipoQ receptor   | <a href="#">Paqr4</a>              | 1.017 | -0.004 | 0.996971 | 0.99884  |
| 7640 | 10538755 | <a href="#">NM_007958</a>          | <a href="#">13990</a>     | SWI/SNF-related, matrix-associ    | <a href="#">Smarcad1</a>           | 1.017 | -0.03  | 0.97653  | 0.990253 |
| 7641 | 10375549 | <a href="#">NM_146468</a>          | <a href="#">258460</a>    | olfactory receptor 1391           | <a href="#">Olf1391</a>            | 1.017 | 0.433  | 0.677364 | 0.856571 |

|      |          |                                    |                           |                                                                  |                                    |       |        |          |          |
|------|----------|------------------------------------|---------------------------|------------------------------------------------------------------|------------------------------------|-------|--------|----------|----------|
| 7642 | 10354630 | <a href="#">NM_001033194</a>       | <a href="#">98488</a>     | general transcription factor I                                   | <a href="#">Gtf3c3</a>             | 1.017 | -0.003 | 0.997945 | 0.999268 |
| 7643 | 10423568 | <a href="#">ENSMUST00000069422</a> | <a href="#">70515</a>     | RIKEN cDNA 5730407107 gene                                       | <a href="#">5730407107Rik</a>      | 1.017 | 0.589  | 0.573824 | 0.797007 |
| 7644 | 10431585 | <a href="#">NR_004843</a>          | <a href="#">100134861</a> | choline kinase beta, carnitine                                   | <a href="#">Chkb-cpt1b</a>         | 1.017 | 0.378  | 0.716451 | 0.875796 |
| 7645 | 10504419 | <a href="#">NM_027789</a>          | <a href="#">71406</a>     | RIKEN cDNA 5430416009 gene                                       | <a href="#">5430416009Rik</a>      | 1.017 | 0.463  | 0.657232 | 0.846702 |
| 7646 | 10445117 | <a href="#">NM_146514</a>          | <a href="#">258507</a>    | olfactory receptor 96                                            | <a href="#">Olf96</a>              | 1.017 | 0.126  | 0.90353  | 0.962464 |
| 7647 | 10541678 | <a href="#">NM_023143</a>          | <a href="#">50909</a>     | complement component 1, r subc                                   | <a href="#">C1r</a>                | 1.016 | 0.915  | 0.389803 | 0.658464 |
| 7648 | 10558274 | <a href="#">NM_198017</a>          | <a href="#">109359</a>    | RIKEN cDNA C430003P19 gene                                       | <a href="#">C430003P19Rik</a>      | 1.016 | -0.116 | 0.911144 | 0.964566 |
| 7649 | 10518372 | <a href="#">NM_001025365</a>       | <a href="#">28010</a>     | DNA segment, Chr 4, Wayne Stat                                   | <a href="#">D4Wsu114e</a>          | 1.016 | 0.476  | 0.648281 | 0.841814 |
| 7650 | 10538159 | <a href="#">ENSMUST00000101425</a> | <a href="#">666105</a>    | predicted gene, EG666105                                         | <a href="#">EG666105</a>           | 1.016 | 0.652  | 0.534677 | 0.768432 |
| 7651 | 10516678 | <a href="#">NM_008468</a>          | <a href="#">16650</a>     | karyopherin (importin) alpha 6                                   | <a href="#">Kpna6</a>              | 1.016 | 0.35   | 0.736236 | 0.887109 |
| 7652 | 10473606 |                                    |                           |                                                                  |                                    | 1.016 | 0.683  | 0.51607  | 0.755582 |
| 7653 | 10493449 | <a href="#">NM_013691</a>          | <a href="#">21827</a>     | thrombospondin 3                                                 | <a href="#">Thbs3</a>              | 1.016 | 0.228  | 0.825668 | 0.929887 |
| 7654 | 10456601 | <a href="#">NM_028868</a>          | <a href="#">74322</a>     | CXXC finger 1 (PHD domain)                                       | <a href="#">Cxxc1</a>              | 1.016 | -0.265 | 0.798192 | 0.918238 |
| 7655 | 10594551 | <a href="#">NM_172536</a>          | <a href="#">214812</a>    | zinc finger protein 609                                          | <a href="#">Zfp609</a>             | 1.016 | -0.06  | 0.953542 | 0.982042 |
| 7656 | 10470705 | <a href="#">NM_001039087</a>       | <a href="#">107746</a>    | Rap guanine nucleotide exchang                                   | <a href="#">Rapgef1</a>            | 1.016 | -0.23  | 0.824201 | 0.929508 |
| 7657 | 10505187 | <a href="#">NM_011673</a>          | <a href="#">22234</a>     | UDP-glucose ceramide glucosylt                                   | <a href="#">Ugcg</a>               | 1.016 | 0.676  | 0.519913 | 0.757566 |
| 7658 | 10570388 | <a href="#">ENSMUST00000044736</a> | <a href="#">272465</a>    | gene model 687, (NCBI)                                           | <a href="#">Gm687</a>              | 1.016 | 0.68   | 0.517568 | 0.756753 |
| 7659 | 10407358 | <a href="#">NM_145457</a>          | <a href="#">218693</a>    | polyadenylate binding protein-                                   | <a href="#">Paip1</a>              | 1.016 | -0.345 | 0.74004  | 0.889339 |
| 7660 | 10581865 | <a href="#">NM_027570</a>          | <a href="#">52815</a>     | lactate dehydrogenase D                                          | <a href="#">Ldhd</a>               | 1.016 | 0.935  | 0.380208 | 0.649784 |
| 7661 | 10433389 | <a href="#">NM_145362</a>          | <a href="#">208211</a>    | asparagine-linked glycosylatio                                   | <a href="#">Alg1</a>               | 1.016 | 0.56   | 0.592477 | 0.807174 |
| 7662 | 10484553 | <a href="#">NM_001005230</a>       | <a href="#">257900</a>    | olfactory receptor 1024                                          | <a href="#">Olf1024</a>            | 1.016 | 0.398  | 0.701933 | 0.869258 |
| 7663 | 10589960 | <a href="#">ENSMUST00000084841</a> | <a href="#">73748</a>     | glutamate decarboxylase-like 1                                   | <a href="#">Gad1</a>               | 1.016 | 0.241  | 0.816527 | 0.926829 |
| 7664 | 10504056 | <a href="#">NM_023305</a>          | <a href="#">67123</a>     | ubiquitin-associated protein 1                                   | <a href="#">Ubap1</a>              | 1.016 | 0.153  | 0.882836 | 0.953745 |
| 7665 | 10356335 | <a href="#">NM_010341</a>          | <a href="#">14767</a>     | neuromedin U receptor 1                                          | <a href="#">Nmur1</a>              | 1.016 | 0.475  | 0.649086 | 0.842359 |
| 7666 | 10559373 | <a href="#">NM_008003</a>          | <a href="#">14170</a>     | fibroblast growth factor 15                                      | <a href="#">Fgf15</a>              | 1.016 | 0.292  | 0.77838  | 0.909839 |
| 7667 | 10381617 |                                    |                           |                                                                  |                                    | 1.016 | 0.997  | 0.351129 | 0.624551 |
| 7668 | 10559831 | <a href="#">BC023179</a>           | <a href="#">232855</a>    | cDNA sequence BC023179                                           | <a href="#">BC023179</a>           | 1.016 | -0.443 | 0.671    | 0.853953 |
| 7669 | 10542636 | <a href="#">NM_183165</a>          | <a href="#">232491</a>    | pyridine nucleotide-disulphide                                   | <a href="#">Pyroxd1</a>            | 1.016 | 0.022  | 0.982739 | 0.992455 |
| 7670 | 10593225 | <a href="#">NM_001033324</a>       | <a href="#">235320</a>    | zinc finger and BTB domain con                                   | <a href="#">Zbtb16</a>             | 1.016 | 0.456  | 0.661973 | 0.84942  |
| 7671 | 10442739 | <a href="#">NM_028789</a>          | <a href="#">74154</a>     | unkempt-like (Drosophila)                                        | <a href="#">Unkl</a>               | 1.016 | 0.295  | 0.776369 | 0.908709 |
| 7672 | 10457378 | <a href="#">ENSMUST00000070164</a> | <a href="#">791280</a>    | predicted gene,                                                  | <a href="#">ENSMUSG00000056177</a> | 1.016 | 0.028  | 0.978296 | 0.991282 |
| 7673 | 10381115 | <a href="#">NM_011508</a>          | <a href="#">20918</a>     | <a href="#">ENSMUSG0000005</a><br>eukaryotic translation initiat | <a href="#">Eif1</a>               | 1.016 | -0.2   | 0.847302 | 0.938173 |
| 7674 | 10366774 | <a href="#">NM_009635</a>          | <a href="#">11567</a>     | advillin                                                         | <a href="#">Avil</a>               | 1.016 | 0.312  | 0.763617 | 0.901503 |
| 7675 | 10429547 | <a href="#">NM_009991</a>          | <a href="#">13072</a>     | cytochrome P450, family 11, su                                   | <a href="#">Cyp11b2</a>            | 1.016 | 0.324  | 0.754816 | 0.896821 |
| 7676 | 10544547 | <a href="#">NM_001081382</a>       | <a href="#">72306</a>     | zinc finger protein 777                                          | <a href="#">Zfp777</a>             | 1.016 | -0.046 | 0.964205 | 0.985887 |
| 7677 | 10373846 | <a href="#">NM_001029937</a>       | <a href="#">380683</a>    | SEC14-like 3 (S. cerevisiae)                                     | <a href="#">Sec143</a>             | 1.016 | 0.409  | 0.694385 | 0.86574  |
| 7678 | 10524588 | <a href="#">NM_026718</a>          | <a href="#">68420</a>     | ankyrin repeat domain 13a                                        | <a href="#">Ankrd13a</a>           | 1.016 | -0.405 | 0.697509 | 0.867333 |
| 7679 | 10488451 | <a href="#">BC132262</a>           | <a href="#">69277</a>     | RIKEN cDNA 3300002I08 gene                                       | <a href="#">3300002I08Rik</a>      | 1.016 | -0.022 | 0.983206 | 0.992738 |
| 7680 | 10393294 | <a href="#">NM_001033267</a>       | <a href="#">217341</a>    | glutamine rich 2                                                 | <a href="#">Qrich2</a>             | 1.016 | 0.273  | 0.792324 | 0.915409 |
| 7681 | 10589958 | <a href="#">XR_032777</a>          | <a href="#">675823</a>    | similar to Glyceraldehyde-3-ph                                   | <a href="#">LOC675823</a>          | 1.016 | 0.667  | 0.525441 | 0.76158  |
| 7682 | 10425522 | <a href="#">NM_019712</a>          | <a href="#">56438</a>     | ring-box 1                                                       | <a href="#">Rbx1</a>               | 1.016 | -0.175 | 0.866023 | 0.946491 |
| 7683 | 10557076 | <a href="#">NM_139310</a>          | <a href="#">246190</a>    | otoancorin                                                       | <a href="#">Otoa</a>               | 1.016 | 0.762  | 0.470509 | 0.722494 |
| 7684 | 10420823 | <a href="#">NM_177338</a>          | <a href="#">219150</a>    | homeobox containing 1                                            | <a href="#">Hmbox1</a>             | 1.016 | -0.025 | 0.980675 | 0.991919 |
| 7685 | 10589913 | <a href="#">NM_146229</a>          | <a href="#">235661</a>    | dynein cytoplasmic 1 light int                                   | <a href="#">Dync1li1</a>           | 1.016 | -0.079 | 0.939204 | 0.976281 |
| 7686 | 10348791 | <a href="#">NM_207031</a>          | <a href="#">404545</a>    | transmembrane protein 16g                                        | <a href="#">Tmem16g</a>            | 1.016 | 0.047  | 0.964014 | 0.985864 |
| 7687 | 10433564 | <a href="#">ENSMUST00000037913</a> | <a href="#">223970</a>    | RIKEN cDNA A630055G03 gene                                       | <a href="#">A630055G03Rik</a>      | 1.016 | 0.213  | 0.837598 | 0.934421 |
| 7688 | 10457948 | <a href="#">NM_026165</a>          | <a href="#">67453</a>     | solute carrier family 25, memb                                   | <a href="#">Slc25a46</a>           | 1.016 | 0.11   | 0.915133 | 0.966602 |
| 7689 | 10365015 | <a href="#">ENSMUST00000092282</a> | <a href="#">103406</a>    | RIKEN cDNA 9130206N08 gene                                       | <a href="#">9130206N08Rik</a>      | 1.016 | 0.476  | 0.648191 | 0.8418   |
| 7690 | 10392251 | <a href="#">NM_007840</a>          | <a href="#">13207</a>     | DEAD (Asp-Glu-Ala-Asp) box pol                                   | <a href="#">Ddx5</a>               | 1.016 | 0.292  | 0.778249 | 0.909741 |
| 7691 | 10398306 | <a href="#">AK147993</a>           | <a href="#">212198</a>    | WD repeat domain 25                                              | <a href="#">Wdr25</a>              | 1.016 | 0.447  | 0.668181 | 0.851959 |
| 7692 | 10541721 | <a href="#">NM_013539</a>          | <a href="#">14794</a>     | splA/ryanodine receptor domain                                   | <a href="#">Spsb2</a>              | 1.016 | 0.519  | 0.619434 | 0.824819 |

|      |          |                                    |                        |                                |                                    |       |        |          |          |
|------|----------|------------------------------------|------------------------|--------------------------------|------------------------------------|-------|--------|----------|----------|
| 7693 | 10573613 | <a href="#">NM_146859</a>          | <a href="#">258858</a> | olfactory receptor 371         | <a href="#">Olf371</a>             | 1.016 | 0.582  | 0.578607 | 0.798427 |
| 7694 | 10565904 | <a href="#">NM_198831</a>          | <a href="#">52443</a>  | mitochondrial ribosomal protei | <a href="#">Mrpl48</a>             | 1.016 | -0.464 | 0.656183 | 0.846043 |
| 7695 | 10466735 | <a href="#">NM_001114174</a>       | <a href="#">381217</a> | gene model 967, (NCBI)         | <a href="#">Gm967</a>              | 1.016 | 1.074  | 0.31759  | 0.594733 |
| 7696 | 10605104 | <a href="#">NM_001029868</a>       | <a href="#">245469</a> | PDZ domain containing 4        | <a href="#">Pdzd4</a>              | 1.016 | -0.137 | 0.894995 | 0.958652 |
| 7697 | 10566097 | <a href="#">NM_022979</a>          | <a href="#">269966</a> | nucleoporin 98                 | <a href="#">Nup98</a>              | 1.016 | -0.049 | 0.962154 | 0.985362 |
| 7698 | 10565996 | <a href="#">NM_010567</a>          | <a href="#">16332</a>  | inositol polyphosphate phospho | <a href="#">Inpp1l</a>             | 1.016 | 0.251  | 0.809098 | 0.923112 |
| 7699 | 10481175 | <a href="#">BC062145</a>           | <a href="#">66139</a>  | RIKEN cDNA 1110002H13 gene     | <a href="#">1110002H13Rik</a>      | 1.016 | 0.44   | 0.672579 | 0.854651 |
| 7700 | 10515046 | <a href="#">NM_027453</a>          | <a href="#">70533</a>  | basic transcription factor 3-1 | <a href="#">Btf3l4</a>             | 1.016 | -0.027 | 0.979188 | 0.991758 |
| 7701 | 10466976 | <a href="#">NM_138595</a>          | <a href="#">104174</a> | glycine decarboxylase          | <a href="#">Gldc</a>               | 1.016 | 0.216  | 0.834896 | 0.933323 |
| 7702 | 10467739 | <a href="#">NM_027106</a>          | <a href="#">69534</a>  | arginine vasopressin-induced 1 | <a href="#">Avpi1</a>              | 1.016 | -0.007 | 0.994578 | 0.997747 |
| 7703 | 10439566 | <a href="#">NM_007508</a>          | <a href="#">11964</a>  | ATPase, H+ transporting, lysos | <a href="#">Atp6v1a</a>            | 1.016 | 0.016  | 0.988033 | 0.995045 |
| 7704 | 10493834 | <a href="#">NM_207263</a>          | <a href="#">384997</a> | peptidoglycan recognition prot | <a href="#">Pglyrp4</a>            | 1.016 | 1.038  | 0.332804 | 0.608825 |
| 7705 | 10487871 | <a href="#">NM_007682</a>          | <a href="#">12616</a>  | centromere protein B           | <a href="#">Cenpb</a>              | 1.016 | 0.046  | 0.964528 | 0.985942 |
| 7706 | 10542066 | <a href="#">NM_026743</a>          | <a href="#">68498</a>  | tetraspanin 11                 | <a href="#">Tspan11</a>            | 1.016 | 0.25   | 0.80961  | 0.923191 |
| 7707 | 10514319 | <a href="#">NM_172871</a>          | <a href="#">242521</a> | kelch-like 9 (Drosophila)      | <a href="#">Klhl9</a>              | 1.016 | 0.426  | 0.682668 | 0.859827 |
| 7708 | 10592303 | <a href="#">AF060570</a>           | <a href="#">19649</a>  | roundabout homolog 3 (Drosophi | <a href="#">Robo3</a>              | 1.016 | 0.669  | 0.524258 | 0.760908 |
| 7709 | 10392135 | <a href="#">NM_008117</a>          | <a href="#">14599</a>  | growth hormone                 | <a href="#">Gh</a>                 | 1.016 | 0.191  | 0.853589 | 0.940713 |
| 7710 | 10484999 | <a href="#">NM_028119</a>          | <a href="#">107986</a> | damage specific DNA binding pr | <a href="#">Ddb2</a>               | 1.016 | 0.267  | 0.796995 | 0.917479 |
| 7711 | 10572318 | <a href="#">NM_145597</a>          | <a href="#">234371</a> | transmembrane protein 161A     | <a href="#">Tmem161a</a>           | 1.016 | 0.413  | 0.69186  | 0.864682 |
| 7712 | 10532865 | <a href="#">NM_019834</a>          | <a href="#">26431</a>  | G protein-coupled receptor kin | <a href="#">Gir2</a>               | 1.016 | -0.078 | 0.940291 | 0.976739 |
| 7713 | 10583992 | <a href="#">NM_001033323</a>       | <a href="#">235086</a> | immunoglobulin superfamily, me | <a href="#">Igsf9b</a>             | 1.015 | -0.058 | 0.955297 | 0.98291  |
| 7714 | 10592734 | <a href="#">NM_007619</a>          | <a href="#">12402</a>  | Casitas B-lineage lymphoma     | <a href="#">Cbl</a>                | 1.015 | -0.714 | 0.49769  | 0.741949 |
| 7715 | 10555862 | <a href="#">NM_030684</a>          | <a href="#">94094</a>  | tripartite motif-containing 34 | <a href="#">Trim34</a>             | 1.015 | 0.485  | 0.642043 | 0.837836 |
| 7716 | 10526418 | <a href="#">NM_011776</a>          | <a href="#">22788</a>  | zona pellucida glycoprotein 3  | <a href="#">Zp3</a>                | 1.015 | 1.057  | 0.324612 | 0.601113 |
| 7717 | 10586446 |                                    |                        |                                |                                    | 1.015 | 0.518  | 0.619749 | 0.825031 |
| 7718 | 10527327 | <a href="#">NM_018772</a>          | <a href="#">55950</a>  | brain protein I3               | <a href="#">Bri3</a>               | 1.015 | -0.558 | 0.593461 | 0.808046 |
| 7719 | 10464728 | <a href="#">NM_001001984</a>       | <a href="#">225876</a> | F-box and leucine-rich repeat  | <a href="#">Fbxl11</a>             | 1.015 | -0.081 | 0.937833 | 0.975815 |
| 7720 | 10440560 | <a href="#">NM_001081068</a>       | <a href="#">78913</a>  | zinc finger protein 294        | <a href="#">Zfp294</a>             | 1.015 | 0.159  | 0.877759 | 0.951715 |
| 7721 | 10435525 | <a href="#">NM_177128</a>          | <a href="#">320299</a> | IQ calmodulin-binding motif co | <a href="#">Iqcb1</a>              | 1.015 | -0.013 | 0.990276 | 0.995786 |
| 7722 | 10413270 | <a href="#">ENSMUST00000059648</a> | <a href="#">71106</a>  | RIKEN cDNA 4933413J09 gene     | <a href="#">4933413J09Rik</a>      | 1.015 | 0.106  | 0.918367 | 0.967805 |
| 7723 | 10405343 | <a href="#">NM_028841</a>          | <a href="#">74257</a>  | tetraspanin 17                 | <a href="#">Tspan17</a>            | 1.015 | -0.147 | 0.886931 | 0.955613 |
| 7724 | 10450525 | <a href="#">AB242596</a>           | <a href="#">672682</a> | mucin 21                       | <a href="#">Muc21</a>              | 1.015 | 0.69   | 0.512019 | 0.75265  |
| 7725 | 10367598 | <a href="#">ENSMUST00000073478</a> | <a href="#">791342</a> | predicted gene, ENSMUSG0000006 | <a href="#">ENSMUSG00000061261</a> | 1.015 | 0.908  | 0.39326  | 0.66124  |
| 7726 | 10344929 | <a href="#">ENSMUST00000067599</a> | <a href="#">791392</a> | predicted gene, ENSMUSG0000005 | <a href="#">ENSMUSG00000054493</a> | 1.015 | 0.41   | 0.69376  | 0.865705 |
| 7727 | 10449699 | <a href="#">NM_021322</a>          | <a href="#">57773</a>  | WD repeat domain 4             | <a href="#">Wdr4</a>               | 1.015 | 0.087  | 0.933338 | 0.973406 |
| 7728 | 10547173 | <a href="#">NM_026057</a>          | <a href="#">67255</a>  | zinc finger protein 422        | <a href="#">Zfp422</a>             | 1.015 | 0.122  | 0.906577 | 0.963405 |
| 7729 | 10383212 | <a href="#">ENSMUST00000093902</a> | <a href="#">672511</a> | hypothetical LOC672511         | <a href="#">LOC672511</a>          | 1.015 | 0.366  | 0.724823 | 0.880713 |
| 7730 | 10572170 | <a href="#">NM_172491</a>          | <a href="#">211135</a> | RIKEN cDNA D130040H23 gene     | <a href="#">D130040H23Rik</a>      | 1.015 | -0.318 | 0.759153 | 0.89915  |
| 7731 | 10486284 | <a href="#">NM_027175</a>          | <a href="#">69702</a>  | NADH dehydrogenase (ubiquinone | <a href="#">Ndufaf1</a>            | 1.015 | -0.088 | 0.932394 | 0.973077 |
| 7732 | 10464569 | <a href="#">AK079024</a>           | <a href="#">73788</a>  | RIKEN cDNA 4833408A19 gene     | <a href="#">4833408A19Rik</a>      | 1.015 | -0.275 | 0.791287 | 0.915061 |
| 7733 | 10477725 | <a href="#">NM_010808</a>          | <a href="#">17391</a>  | matrix metalloproteinase 24    | <a href="#">Mmp24</a>              | 1.015 | 0.016  | 0.987863 | 0.994998 |
| 7734 | 10492699 | <a href="#">NM_177662</a>          | <a href="#">229445</a> | cathepsin O                    | <a href="#">Ctso</a>               | 1.015 | 0.069  | 0.947213 | 0.979071 |
| 7735 | 10490813 |                                    |                        |                                |                                    | 1.015 | 0.389  | 0.708184 | 0.872296 |
| 7736 | 10386743 | <a href="#">NM_010148</a>          | <a href="#">13855</a>  | epsin 2                        | <a href="#">Epn2</a>               | 1.015 | 0.263  | 0.799738 | 0.919181 |
| 7737 | 10481368 | <a href="#">NM_145520</a>          | <a href="#">227682</a> | TruB pseudouridine (psi) synth | <a href="#">Trub2</a>              | 1.015 | -0.096 | 0.926334 | 0.970777 |
| 7738 | 10459930 | <a href="#">NM_026295</a>          | <a href="#">67655</a>  | CTD (carboxy-terminal domain,  | <a href="#">Ctdp1</a>              | 1.015 | 0.118  | 0.90926  | 0.963879 |
| 7739 | 10518526 | <a href="#">NM_001039554</a>       | <a href="#">654812</a> | angiopoietin-like 7            | <a href="#">Angptl7</a>            | 1.015 | 0.404  | 0.698078 | 0.867716 |
| 7740 | 10451932 | <a href="#">NM_020568</a>          | <a href="#">57435</a>  | plasma membrane associated pro | <a href="#">S3-12</a>              | 1.015 | 0.249  | 0.810344 | 0.923512 |
| 7741 | 10451932 | <a href="#">NM_020568</a>          | <a href="#">57435</a>  |                                |                                    |       |        |          |          |
| 7742 | 10491567 | <a href="#">NM_029649</a>          | <a href="#">76547</a>  | transmembrane protein 101      | <a href="#">Tmem101</a>            | 1.015 | 0.454  | 0.6934   | 0.830117 |
| 7743 | 10493792 | <a href="#">XR_051453</a>          | <a href="#">435554</a> | similar to RAE1 RNA export 1 h | <a href="#">LOC435554</a>          | 1.015 | 0.159  | 0.877883 | 0.951715 |
| 7743 | 10511069 | <a href="#">NM_008142</a>          | <a href="#">14688</a>  | guanine nucleotide binding pro | <a href="#">Gnb1</a>               | 1.015 | 0.224  | 0.829329 | 0.93131  |
| 7744 | 10535732 | <a href="#">NM_001010941</a>       | <a href="#">14738</a>  | G-protein coupled receptor 12  | <a href="#">Gpr12</a>              | 1.015 | -0.193 | 0.852513 | 0.940498 |
| 7745 | 10454985 | <a href="#">NM_172830</a>          | <a href="#">210015</a> |                                |                                    | 1.015 | 0.227  | 0.827132 | 0.888620 |

|      |          |                                    |                           |                                 |                                    |       |        |          |          |
|------|----------|------------------------------------|---------------------------|---------------------------------|------------------------------------|-------|--------|----------|----------|
| 7745 | 10454885 | <a href="#">NM 172830</a>          | <a href="#">240212</a>    | solute carrier family 4, sodiu  | <a href="#">Slc4a9</a>             | 1.015 | 0.226  | 0.827432 | 0.930659 |
| 7746 | 10521136 | <a href="#">NM 001081102</a>       | <a href="#">107823</a>    | Wolf-Hirschhorn syndrome candi  | <a href="#">Whsc1</a>              | 1.015 | -0.294 | 0.777164 | 0.909278 |
| 7747 | 10372060 | <a href="#">NM 009950</a>          | <a href="#">12905</a>     | CASP2 and RIPK1 domain contain  | <a href="#">Cradd</a>              | 1.015 | 0.181  | 0.861067 | 0.94412  |
| 7748 | 10348858 | <a href="#">NM 016778</a>          | <a href="#">51800</a>     | Bcl-2-related ovarian killer p  | <a href="#">Bok</a>                | 1.015 | -0.041 | 0.968069 | 0.987165 |
| 7749 | 10469849 | <a href="#">NM 026021</a>          | <a href="#">67187</a>     | zinc finger, MYND domain conta  | <a href="#">Zmynd19</a>            | 1.015 | 0.3    | 0.77295  | 0.906599 |
| 7750 | 10474958 | <a href="#">NM 019454</a>          | <a href="#">54485</a>     | delta-like 4 (Drosophila)       | <a href="#">Dll4</a>               | 1.015 | 0.179  | 0.862805 | 0.945192 |
| 7751 | 10558029 | <a href="#">NM 001029982</a>       | <a href="#">207352</a>    | Sec23 interacting protein       | <a href="#">Sec23ip</a>            | 1.015 | -0.121 | 0.906948 | 0.963547 |
| 7752 | 10370911 | <a href="#">NM 078477</a>          | <a href="#">118445</a>    | Kruppel-like factor 16          | <a href="#">Klf16</a>              | 1.015 | -0.063 | 0.951398 | 0.981144 |
| 7753 | 10393341 | <a href="#">NM 172572</a>          | <a href="#">217344</a>    | rhomboid 5 homolog 2 (Drosophi) | <a href="#">Rhbf2</a>              | 1.015 | 0.219  | 0.832516 | 0.932679 |
| 7754 | 10354979 | <a href="#">NM 028717</a>          | <a href="#">74018</a>     | amyotrophic lateral sclerosis   | <a href="#">Als2</a>               | 1.015 | -0.054 | 0.958225 | 0.984334 |
| 7755 | 10476005 | <a href="#">ENSMUST00000071053</a> | <a href="#">329513</a>    | RIKEN cDNA A730036I17 gene      | <a href="#">A730036I17Rik</a>      | 1.015 | 0.287  | 0.781897 | 0.911385 |
| 7756 | 10585778 | <a href="#">NM 011352</a>          | <a href="#">20361</a>     | sema domain, immunoglobulin do  | <a href="#">Sema7a</a>             | 1.015 | 0.348  | 0.738061 | 0.888294 |
| 7757 | 10526427 | <a href="#">NM 023742</a>          | <a href="#">74198</a>     | deltex 2 homolog (Drosophila)   | <a href="#">Dtx2</a>               | 1.015 | 0.074  | 0.942813 | 0.977825 |
| 7758 | 10393197 | <a href="#">NM 025276</a>          | <a href="#">14027</a>     | envoplakin                      | <a href="#">Evpl</a>               | 1.015 | 0.194  | 0.851563 | 0.940193 |
| 7759 | 10573956 | <a href="#">NM 009209</a>          | <a href="#">20538</a>     | solute carrier family 6 (neuro  | <a href="#">Slc6a2</a>             | 1.015 | 0.013  | 0.9901   | 0.995679 |
| 7760 | 10507334 | <a href="#">BC022733</a>           | <a href="#">68394</a>     | RIKEN cDNA O610037D15 gene      | <a href="#">O610037D15Rik</a>      | 1.015 | 0.437  | 0.67465  | 0.855467 |
| 7761 | 10442948 | <a href="#">NM 024227</a>          | <a href="#">68611</a>     | mitochondrial ribosomal protei  | <a href="#">Mrpl28</a>             | 1.015 | -0.427 | 0.681592 | 0.859316 |
| 7762 | 10391254 | <a href="#">NM 001081194</a>       | <a href="#">380728</a>    | potassium voltage-gated channe  | <a href="#">Kcnh4</a>              | 1.015 | 0.17   | 0.869521 | 0.947688 |
| 7763 | 10520648 |                                    |                           |                                 |                                    | 1.015 | 0.288  | 0.781198 | 0.911067 |
| 7764 | 10401428 | <a href="#">ENSMUST00000110294</a> | <a href="#">238317</a>    | RIKEN cDNA C130039O16 gene      | <a href="#">C130039O16Rik</a>      | 1.015 | 0.285  | 0.783902 | 0.912068 |
| 7765 | 10385926 | <a href="#">NM 178626</a>          | <a href="#">72729</a>     | CDC42 small effector 2          | <a href="#">Cdc42se2</a>           | 1.015 | -0.307 | 0.767273 | 0.903106 |
| 7766 | 10502469 | <a href="#">NM 019808</a>          | <a href="#">56376</a>     | PDZ and LIM domain 5            | <a href="#">Pdlim5</a>             | 1.015 | -0.154 | 0.882117 | 0.953469 |
| 7767 | 10468525 | <a href="#">ENSMUST00000099340</a> | <a href="#">100038642</a> | predicted gene, ENSMUSG0000007  | <a href="#">ENSMUSG00000074788</a> | 1.015 | 0.773  | 0.464133 | 0.717962 |
| 7768 | 10372534 | <a href="#">NM 001037846</a>       | <a href="#">72068</a>     | CCR4-NOT transcription complex  | <a href="#">Cnot2</a>              | 1.015 | 0.189  | 0.855411 | 0.941478 |
| 7769 | 10581271 | <a href="#">NM 175160</a>          | <a href="#">70796</a>     | zinc finger, DHHC domain conta  | <a href="#">Zdhhc1</a>             | 1.015 | 0.221  | 0.831089 | 0.932182 |
| 7770 | 10551828 | <a href="#">NM 001033540</a>       | <a href="#">330503</a>    | predicted gene, EG330503        | <a href="#">EG330503</a>           | 1.015 | 0.44   | 0.672708 | 0.854651 |
| 7771 | 10487797 | <a href="#">NM 033615</a>          | <a href="#">110751</a>    | a disintegrin and metallopepti  | <a href="#">Adam33</a>             | 1.015 | 0.248  | 0.811186 | 0.923829 |
| 7772 | 10450856 | <a href="#">NM 146456</a>          | <a href="#">258448</a>    | olfactory receptor 92           | <a href="#">Olfr92</a>             | 1.015 | 0.125  | 0.903786 | 0.962655 |
| 7773 | 10379204 | <a href="#">NM 026389</a>          | <a href="#">67811</a>     | polymerase (DNA-directed), del  | <a href="#">Poldip2</a>            | 1.015 | -0.327 | 0.752804 | 0.89584  |
| 7774 | 10369748 | <a href="#">ENSMUST00000054760</a> | <a href="#">631906</a>    | predicted gene, EG631906        | <a href="#">EG631906</a>           | 1.014 | 0.205  | 0.843529 | 0.936586 |
| 7775 | 10471062 | <a href="#">BC027220</a>           | <a href="#">66617</a>     | RIKEN cDNA 2610205E22 gene      | <a href="#">2610205E22Rik</a>      | 1.014 | 0.251  | 0.80885  | 0.923103 |
| 7776 | 10372853 | <a href="#">NM 019786</a>          | <a href="#">56480</a>     | TANK-binding kinase 1           | <a href="#">Tbk1</a>               | 1.014 | 0.229  | 0.825293 | 0.929712 |
| 7777 | 10601178 | <a href="#">NM 013712</a>          | <a href="#">26549</a>     | integrin beta 1 binding protei  | <a href="#">Itgb1bp2</a>           | 1.014 | 0.321  | 0.757084 | 0.898052 |
| 7778 | 10564522 |                                    |                           |                                 |                                    | 1.014 | -0.101 | 0.922457 | 0.969068 |
| 7779 | 10481574 | <a href="#">NM 175511</a>          | <a href="#">241303</a>    | RIKEN cDNA A130092J06 gene      | <a href="#">A130092J06Rik</a>      | 1.014 | 0.383  | 0.712813 | 0.874143 |
| 7780 | 10352166 | <a href="#">BC054802</a>           | <a href="#">226744</a>    | RIKEN cDNA 9630058J23 gene      | <a href="#">9630058J23Rik</a>      | 1.014 | 0.26   | 0.802408 | 0.919965 |
| 7781 | 10577544 | <a href="#">NM 011130</a>          | <a href="#">18970</a>     | polymerase (DNA directed), bet  | <a href="#">Polb</a>               | 1.014 | -0.132 | 0.898778 | 0.960077 |
| 7782 | 10528598 | <a href="#">NM 023229</a>          | <a href="#">66587</a>     | Fas-activated serine/threonine  | <a href="#">Fastk</a>              | 1.014 | 0.009  | 0.992909 | 0.997248 |
| 7783 | 10383887 | <a href="#">NM 197979</a>          | <a href="#">66152</a>     | RIKEN cDNA 1110020P15 gene      | <a href="#">1110020P15Rik</a>      | 1.014 | -0.357 | 0.731653 | 0.884308 |
| 7784 | 10572514 | <a href="#">ENSMUST00000050921</a> | <a href="#">442796</a>    | RIKEN cDNA A230052G05 gene      | <a href="#">A230052G05Rik</a>      | 1.014 | 0.615  | 0.557192 | 0.785575 |
| 7785 | 10359097 | <a href="#">NM 144791</a>          | <a href="#">208263</a>    | torsin A interacting protein 1  | <a href="#">Tor1aip1</a>           | 1.014 | -0.015 | 0.98873  | 0.995308 |
| 7786 | 10352945 |                                    |                           |                                 |                                    | 1.014 | 0.134  | 0.897013 | 0.95959  |
| 7787 | 10436498 | <a href="#">ENSMUST00000050665</a> | <a href="#">71135</a>     | RIKEN cDNA 4933411O13 gene      | <a href="#">4933411O13Rik</a>      | 1.014 | 0.433  | 0.677839 | 0.856898 |
| 7788 | 10525236 | <a href="#">BC051044</a>           | <a href="#">269700</a>    | expressed sequence AU042671     | <a href="#">AU042671</a>           | 1.014 | 0.302  | 0.770889 | 0.905387 |
| 7789 | 10437561 | <a href="#">BC051078</a>           | <a href="#">70511</a>     | RIKEN cDNA 5730409G15 gene      | <a href="#">5730409G15Rik</a>      | 1.014 | 0.074  | 0.942996 | 0.977825 |
| 7790 | 10600921 | <a href="#">NM 199018</a>          | <a href="#">236920</a>    | START domain containing 8       | <a href="#">Stard8</a>             | 1.014 | 0.224  | 0.828819 | 0.931167 |
| 7791 | 10461110 |                                    |                           |                                 |                                    | 1.014 | 0.505  | 0.628438 | 0.830964 |
| 7792 | 10557036 | <a href="#">NM 199018</a>          | <a href="#">236920</a>    | RIKEN cDNA E130201H02           | <a href="#">E130201H02Rik</a>      | 1.014 | 0.703  | 0.452101 | 0.70077  |

|      |          |                                    |                           |                                    |                                    |       |        |          |          |
|------|----------|------------------------------------|---------------------------|------------------------------------|------------------------------------|-------|--------|----------|----------|
| 7792 | 10556938 | <a href="#">ENSMUST00000053151</a> | <a href="#">78552</a>     | gene                               | <a href="#">E130201H02Rik</a>      | 1.014 | 0.793  | 0.453181 | 0.70973  |
| 7793 | 10348471 | <a href="#">NM_053015</a>          | <a href="#">171531</a>    | melanophilin                       | <a href="#">Mlph</a>               | 1.014 | 0.598  | 0.568358 | 0.793239 |
| 7794 | 10344715 |                                    |                           |                                    |                                    | 1.014 | 0.416  | 0.689407 | 0.863658 |
| 7795 | 10503036 | <a href="#">NM_001093752</a>       | <a href="#">69207</a>     | splicing factor, arginine/seri     | <a href="#">Sfrs11</a>             | 1.014 | 0.401  | 0.699973 | 0.868609 |
| 7796 | 10396905 | <a href="#">AK028383</a>           | <a href="#">217682</a>    | RIKEN cDNA 3830431G21<br>gene      | <a href="#">3830431G21Rik</a>      | 1.014 | 0.587  | 0.575334 | 0.797076 |
| 7797 | 10603807 |                                    |                           |                                    |                                    | 1.014 | 0.272  | 0.793065 | 0.9157   |
| 7798 | 10587000 | <a href="#">NM_026314</a>          | <a href="#">67685</a>     | dyslexia susceptibility 1 cand     | <a href="#">Dyx1c1</a>             | 1.014 | 0.274  | 0.79208  | 0.915332 |
| 7799 | 10477649 | <a href="#">NM_019811</a>          | <a href="#">60525</a>     | acyl-CoA synthetase short-chai     | <a href="#">Acss2</a>              | 1.014 | 0.208  | 0.84126  | 0.935777 |
| 7800 | 10605195 | <a href="#">NM_008224</a>          | <a href="#">15161</a>     | host cell factor C1                | <a href="#">Hcfc1</a>              | 1.014 | -0.194 | 0.851497 | 0.940193 |
| 7801 | 10378126 | <a href="#">NM_009671</a>          | <a href="#">11736</a>     | ankyrin repeat and FYVE<br>domain  | <a href="#">Ankfy1</a>             | 1.014 | 0.137  | 0.894814 | 0.958505 |
| 7802 | 10430438 | <a href="#">NM_144849</a>          | <a href="#">223690</a>    | ankyrin repeat domain 54           | <a href="#">Ankrd54</a>            | 1.014 | 0.289  | 0.780633 | 0.910911 |
| 7803 | 10435626 | <a href="#">NM_013547</a>          | <a href="#">15233</a>     | homogentisate 1, 2-dioxygenase     | <a href="#">Hgd</a>                | 1.014 | 0.765  | 0.468837 | 0.721057 |
| 7804 | 10557853 | <a href="#">ENSMUST00000079045</a> | <a href="#">319527</a>    | RIKEN cDNA B230325K18<br>gene      | <a href="#">B230325K18Rik</a>      | 1.014 | 0.34   | 0.743185 | 0.890598 |
| 7805 | 10448811 | <a href="#">NM_020608</a>          | <a href="#">57334</a>     | Crip, cramped-like (Drosophila)    | <a href="#">Crapm1</a>             | 1.014 | 0.458  | 0.660292 | 0.848652 |
| 7806 | 10516325 | <a href="#">NM_155883</a>          | <a href="#">100206</a>    | ADP-ribosylhydrolase like 2        | <a href="#">Adp1m2</a>             | 1.014 | 0.224  | 0.828628 | 0.931175 |
| 7807 | 10495518 | <a href="#">NM_153157</a>          | <a href="#">229759</a>    | olfactomedin 3                     | <a href="#">Olfm3</a>              | 1.014 | 0.592  | 0.572072 | 0.796172 |
| 7808 | 10461012 | <a href="#">NM_026306</a>          | <a href="#">67674</a>     | RIKEN cDNA 0610038D11<br>gene      | <a href="#">0610038D11Rik</a>      | 1.014 | -0.044 | 0.965961 | 0.986394 |
| 7809 | 10596951 | <a href="#">NM_011790</a>          | <a href="#">23807</a>     | ariadne homolog 2 (Drosophila)     | <a href="#">Arih2</a>              | 1.014 | -0.392 | 0.706043 | 0.871814 |
| 7810 | 10383055 | <a href="#">NM_007623</a>          | <a href="#">12416</a>     | chromobox homolog 2<br>(Drosophil) | <a href="#">Cbx2</a>               | 1.014 | -0.152 | 0.883173 | 0.954001 |
| 7811 | 10468562 | <a href="#">NM_001081076</a>       | <a href="#">73707</a>     | guanylate cyclase 2g               | <a href="#">Gucy2g</a>             | 1.014 | 0.198  | 0.848339 | 0.938486 |
| 7812 | 10518331 |                                    |                           |                                    |                                    | 1.014 | 0.614  | 0.558301 | 0.786038 |
| 7813 | 10415415 | <a href="#">BC116260</a>           | <a href="#">219094</a>    | RIKEN cDNA 9130227C08Rik<br>gene   | <a href="#">9130227C08Rik</a>      | 1.014 | 0.12   | 0.908014 | 0.963723 |
| 7814 | 10516323 | <a href="#">ENSMUST00000097890</a> | <a href="#">667193</a>    | predicted gene, EG667193           | <a href="#">EG667193</a>           | 1.014 | -0.014 | 0.989119 | 0.995308 |
| 7815 | 10595169 | <a href="#">AK016017</a>           | <a href="#">67648</a>     | RIKEN cDNA 4930542C12<br>gene      | <a href="#">4930542C12Rik</a>      | 1.014 | 0.422  | 0.684975 | 0.860758 |
| 7816 | 10360344 | <a href="#">NM_010045</a>          | <a href="#">13349</a>     | Duffy blood group, chemokine r     | <a href="#">Darc</a>               | 1.014 | 0.289  | 0.780682 | 0.910917 |
| 7817 | 10593947 | <a href="#">NM_146223</a>          | <a href="#">235415</a>    | complexin 3                        | <a href="#">Cplx3</a>              | 1.014 | 1.109  | 0.303075 | 0.579092 |
| 7818 | 10537501 | <a href="#">NM_020502</a>          | <a href="#">57253</a>     | taste receptor, type 2, member     | <a href="#">Tas2r108</a>           | 1.014 | 0.143  | 0.890368 | 0.956943 |
| 7819 | 10371446 | <a href="#">NM_177772</a>          | <a href="#">270757</a>    | bactericidal/permeability-incr     | <a href="#">Bpil2</a>              | 1.014 | 0.618  | 0.555525 | 0.784214 |
| 7820 | 10584787 | <a href="#">NM_021481</a>          | <a href="#">58866</a>     | trehalase (brush-border membra     | <a href="#">Treh</a>               | 1.014 | 0.591  | 0.572292 | 0.796254 |
| 7821 | 10422657 | <a href="#">ENSMUST00000045736</a> | <a href="#">223825</a>    | RIKEN cDNA 4930455B06<br>gene      | <a href="#">4930455B06Rik</a>      | 1.014 | 0.394  | 0.704794 | 0.871013 |
| 7822 | 10435714 | <a href="#">NM_026407</a>          | <a href="#">67846</a>     | transmembrane protein 39a          | <a href="#">Tmem39a</a>            | 1.014 | -0.184 | 0.858801 | 0.943374 |
| 7823 | 10363475 | <a href="#">NM_011073</a>          | <a href="#">18646</a>     | perforin 1 (pore forming prote     | <a href="#">Prf1</a>               | 1.014 | 0.61   | 0.560647 | 0.78784  |
| 7824 | 10574903 | <a href="#">NM_181594</a>          | <a href="#">234699</a>    | enhancer of mRNA decapping 4       | <a href="#">Edc4</a>               | 1.014 | -0.042 | 0.967634 | 0.987137 |
| 7825 | 10402140 | <a href="#">ENSMUST00000101128</a> | <a href="#">100038679</a> | predicted gene,<br>ENSMUSG00000007 | <a href="#">ENSMUSG00000072880</a> | 1.014 | 0.138  | 0.894196 | 0.958327 |
| 7826 | 10574427 | <a href="#">NM_011830</a>          | <a href="#">23918</a>     | inosine 5'-phosphate dehydroge     | <a href="#">Impdh2</a>             | 1.014 | -0.505 | 0.628326 | 0.830956 |
| 7827 | 10403052 | <a href="#">XR_033970</a>          | <a href="#">638798</a>    | similar to transcription elong     | <a href="#">LOC638798</a>          | 1.014 | -1.251 | 0.250123 | 0.524217 |
| 7828 | 10569100 |                                    |                           |                                    |                                    | 1.014 | 0.722  | 0.492899 | 0.73872  |
| 7829 | 10584624 | <a href="#">ENSMUST00000116604</a> | <a href="#">100042548</a> | similar to HVEC cell-cell adhe     | <a href="#">LOC100042548</a>       | 1.014 | 0.419  | 0.687448 | 0.862174 |
| 7830 | 10392010 | <a href="#">AK153679</a>           | <a href="#">76719</a>     | RIKEN cDNA 1700081L11 gene         | <a href="#">1700081L11Rik</a>      | 1.014 | 0.359  | 0.72993  | 0.883264 |
| 7831 | 10449914 | <a href="#">NM_172458</a>          | <a href="#">208292</a>    | RIKEN cDNA 9030612M13<br>gene      | <a href="#">9030612M13Rik</a>      | 1.014 | 0.678  | 0.518675 | 0.757118 |
| 7832 | 10435470 | <a href="#">NM_008465</a>          | <a href="#">16646</a>     | karyopherin (importin) alpha 1     | <a href="#">Kpna1</a>              | 1.014 | 0.342  | 0.742357 | 0.890171 |
| 7833 | 10430533 | <a href="#">NM_008427</a>          | <a href="#">16520</a>     | potassium inwardly-rectifying      | <a href="#">Kcnj4</a>              | 1.014 | 0.176  | 0.865076 | 0.946153 |
| 7834 | 10592593 | <a href="#">NM_009347</a>          | <a href="#">21683</a>     | tectorin alpha                     | <a href="#">Tecta</a>              | 1.014 | 0.296  | 0.775782 | 0.908358 |
| 7835 | 10525516 | <a href="#">ENSMUST00000069311</a> | <a href="#">269701</a>    | WD repeat domain 66                | <a href="#">Wdr66</a>              | 1.014 | 0.302  | 0.770858 | 0.905387 |
| 7836 | 10547508 | <a href="#">NM_033567</a>          | <a href="#">94047</a>     | cat eye syndrome chromosome<br>re  | <a href="#">Cecr6</a>              | 1.014 | 0.217  | 0.834314 | 0.933071 |
| 7837 | 10585851 | <a href="#">NM_001081192</a>       | <a href="#">330953</a>    | hyperpolarization-activated, c     | <a href="#">Hcn4</a>               | 1.013 | 0.11   | 0.915181 | 0.966602 |
| 7838 | 10581890 | <a href="#">NM_009954</a>          | <a href="#">12927</a>     | breast cancer anti-estrogen re     | <a href="#">Bcar1</a>              | 1.013 | 0.021  | 0.984166 | 0.993232 |
| 7839 | 10492480 | <a href="#">NM_138591</a>          | <a href="#">28030</a>     | G elongation factor, mitochond     | <a href="#">Gfm1</a>               | 1.013 | -0.318 | 0.759312 | 0.899156 |

|      |          |                                    |                           |                                 |                               |       |        |          |          |
|------|----------|------------------------------------|---------------------------|---------------------------------|-------------------------------|-------|--------|----------|----------|
| 7840 | 10430693 | <a href="#">NM_001082536</a>       | <a href="#">223701</a>    | MKL (megakaryoblastic leukemia) | <a href="#">Mkl1</a>          | 1.013 | 0.189  | 0.854938 | 0.941302 |
| 7841 | 10563891 | <a href="#">AF043260</a>           | <a href="#">17974</a>     | non-catalytic region of tyrosi  | <a href="#">Nck2</a>          | 1.013 | 0.89   | 0.402272 | 0.667397 |
| 7842 | 10455395 | <a href="#">NM_001081180</a>       | <a href="#">72432</a>     | serine peptidase inhibitor, Ka  | <a href="#">Spink5</a>        | 1.013 | 0.524  | 0.615821 | 0.822286 |
| 7843 | 10409445 | <a href="#">NM_029303</a>          | <a href="#">75477</a>     | profilin 3                      | <a href="#">Pfn3</a>          | 1.013 | 0.308  | 0.766864 | 0.902924 |
| 7844 | 10511282 | <a href="#">NM_011659</a>          | <a href="#">22163</a>     | tumor necrosis factor receptor  | <a href="#">Tnfrsf4</a>       | 1.013 | 0.045  | 0.965333 | 0.986124 |
| 7845 | 10365125 | <a href="#">AK080664</a>           | <a href="#">102115</a>    | deoxyhypusine hydroxylase/mono  | <a href="#">Dohh</a>          | 1.013 | 0.139  | 0.892996 | 0.957774 |
| 7846 | 10450237 | <a href="#">ENSMUST00000047263</a> | <a href="#">632302</a>    | cytochrome P450, family 21, su  | <a href="#">Cyp21a2-ps</a>    | 1.013 | -0.055 | 0.957831 | 0.984129 |
| 7847 | 10545127 | <a href="#">ENSMUST00000065878</a> | <a href="#">75373</a>     | RIKEN cDNA 4930597O21 gene      | <a href="#">4930597O21Rik</a> | 1.013 | -0.277 | 0.789465 | 0.914397 |
| 7848 | 10352705 | <a href="#">ENSMUST00000077889</a> | <a href="#">75558</a>     | RIKEN cDNA 1700022P22 gene      | <a href="#">1700022P22Rik</a> | 1.013 | 1.236  | 0.255349 | 0.529739 |
| 7849 | 10402808 | <a href="#">NM_010588</a>          | <a href="#">16450</a>     | jagged 2                        | <a href="#">Jag2</a>          | 1.013 | 0.276  | 0.790044 | 0.914502 |
| 7850 | 10397536 | <a href="#">XM_001476146</a>       | <a href="#">100045836</a> | hypothetical protein LOC100045  | <a href="#">LOC100045836</a>  | 1.013 | -0.202 | 0.845745 | 0.937284 |
| 7851 | 10527516 | <a href="#">NM_145155</a>          | <a href="#">245880</a>    | WAS protein family, member 3    | <a href="#">Wasf3</a>         | 1.013 | -0.459 | 0.659762 | 0.848541 |
| 7852 | 10503190 | <a href="#">NM_001081417</a>       | <a href="#">320790</a>    | chromodomain helicase DNA bind  | <a href="#">Chd7</a>          | 1.013 | 0.774  | 0.463612 | 0.717772 |
| 7853 | 10582482 | <a href="#">AY751521</a>           | <a href="#">72325</a>     | RIKEN cDNA 1300018I17 gene      | <a href="#">1300018I17Rik</a> | 1.013 | 0.078  | 0.940027 | 0.976656 |
| 7854 | 10501402 | <a href="#">NM_029522</a>          | <a href="#">76123</a>     | G-protein signalling modulator  | <a href="#">Gpsm2</a>         | 1.013 | 0.17   | 0.869792 | 0.947894 |
| 7855 | 10434754 | <a href="#">ENSMUST00000089895</a> | <a href="#">100037399</a> | RIKEN cDNA B630019A10 gene      | <a href="#">B630019A10Rik</a> | 1.013 | 0.331  | 0.750218 | 0.894442 |
| 7856 | 10440977 | <a href="#">NM_138597</a>          | <a href="#">28080</a>     | ATP synthase, H+ transporting,  | <a href="#">Atp5o</a>         | 1.013 | -0.365 | 0.725582 | 0.88115  |
| 7857 | 10524369 | <a href="#">NM_138646</a>          | <a href="#">192232</a>    | Hermansky-Pudlak syndrome 4 ho  | <a href="#">Hps4</a>          | 1.013 | 0.118  | 0.908949 | 0.963765 |
| 7858 | 10504728 | <a href="#">NM_183298</a>          | <a href="#">110805</a>    | forkhead box E1 (thyroid trans  | <a href="#">Foxe1</a>         | 1.013 | -0.069 | 0.947182 | 0.979071 |
| 7859 | 10489591 | <a href="#">NM_199027</a>          | <a href="#">329559</a>    | zinc finger protein 335         | <a href="#">Zfp335</a>        | 1.013 | 0.222  | 0.830677 | 0.932075 |
| 7860 | 10399559 | <a href="#">NM_133699</a>          | <a href="#">68775</a>     | ATPase, H+ transporting, lysos  | <a href="#">Atp6v1c2</a>      | 1.013 | 0.438  | 0.673973 | 0.855115 |
| 7861 | 10484237 | <a href="#">NM_178723</a>          | <a href="#">241494</a>    | zinc finger protein 385B        | <a href="#">Zfp385b</a>       | 1.013 | 0.235  | 0.821069 | 0.92863  |
| 7862 | 10581664 | <a href="#">BC016254</a>           | <a href="#">76527</a>     | RIKEN cDNA 2010004A03 gene      | <a href="#">2010004A03Rik</a> | 1.013 | 0.269  | 0.795359 | 0.916955 |
| 7863 | 10586390 | <a href="#">NM_001033158</a>       | <a href="#">70784</a>     | RAS-like, family 12             | <a href="#">Rasl12</a>        | 1.013 | 0.399  | 0.701534 | 0.869143 |
| 7864 | 10543118 | <a href="#">XR_031071</a>          | <a href="#">100044855</a> | similar to F-box protein 5      | <a href="#">LOC100044855</a>  | 1.013 | 0.222  | 0.830164 | 0.931737 |
| 7865 | 10520574 | <a href="#">NM_001048192</a>       | <a href="#">231093</a>    | ATP/GTP binding protein-like 5  | <a href="#">Aglb5</a>         | 1.013 | 0.232  | 0.823249 | 0.929358 |
| 7866 | 10575861 | <a href="#">NM_024219</a>          | <a href="#">68196</a>     | heat shock factor binding prot  | <a href="#">Hsbp1</a>         | 1.013 | -0.404 | 0.697613 | 0.86736  |
| 7867 | 10559708 | <a href="#">NM_011813</a>          | <a href="#">23877</a>     | Flt3 interacting zinc finger p  | <a href="#">Fiz1</a>          | 1.013 | -0.247 | 0.811697 | 0.923946 |
| 7868 | 10543213 | <a href="#">NM_175312</a>          | <a href="#">101148</a>    | RIKEN cDNA B630005N14 gene      | <a href="#">B630005N14Rik</a> | 1.013 | -0.268 | 0.795983 | 0.917149 |
| 7869 | 10401473 | <a href="#">NM_134042</a>          | <a href="#">104776</a>    | aldehyde dehydrogenase family   | <a href="#">Aldh6a1</a>       | 1.013 | 0.037  | 0.971515 | 0.988148 |
| 7870 | 10355763 | <a href="#">NM_001003917</a>       | <a href="#">245860</a>    | autophagy-related9A (yeast)     | <a href="#">Atg9a</a>         | 1.013 | 0.348  | 0.737677 | 0.888186 |
| 7871 | 10459153 | <a href="#">NM_009880</a>          | <a href="#">12590</a>     | caudal type homeo box 1         | <a href="#">Cdx1</a>          | 1.013 | 0.285  | 0.783572 | 0.912068 |
| 7872 | 10368224 |                                    |                           |                                 |                               | 1.013 | 0.283  | 0.784866 | 0.912507 |
| 7873 | 10462603 | <a href="#">NM_007987</a>          | <a href="#">14102</a>     | Fas (TNF receptor superfamily)  | <a href="#">Fas</a>           | 1.013 | 0.237  | 0.819206 | 0.928258 |
| 7874 | 10544555 | <a href="#">ENSMUST00000073124</a> | <a href="#">69228</a>     | zinc finger protein 746         | <a href="#">Zfp746</a>        | 1.013 | -0.219 | 0.832922 | 0.932703 |
| 7875 | 10385671 | <a href="#">ENSMUST00000109123</a> | <a href="#">74408</a>     | RIKEN cDNA 4933414I15 gene      | <a href="#">4933414I15Rik</a> | 1.013 | 0.335  | 0.747367 | 0.892632 |
| 7876 | 10494632 | <a href="#">NM_027665</a>          | <a href="#">71078</a>     | a disintegrin and metallopepti  | <a href="#">Adam30</a>        | 1.013 | 0.495  | 0.635305 | 0.834289 |
| 7877 | 10448424 | <a href="#">NM_011062</a>          | <a href="#">18607</a>     | 3-phosphoinositide dependent p  | <a href="#">Pdk1</a>          | 1.013 | -0.071 | 0.945248 | 0.978427 |
| 7878 | 10592763 | <a href="#">NM_178420</a>          | <a href="#">270151</a>    | NLR family member X1            | <a href="#">NlrX1</a>         | 1.013 | 0.297  | 0.774597 | 0.907574 |
| 7879 | 10409314 | <a href="#">NM_013601</a>          | <a href="#">17702</a>     | homeobox, msh-like 2            | <a href="#">Msx2</a>          | 1.013 | 0.213  | 0.837536 | 0.934421 |
| 7880 | 10491695 | <a href="#">NM_001008502</a>       | <a href="#">241950</a>    | Bardet-Biedl syndrome 12 (huma  | <a href="#">Bbs12</a>         | 1.013 | -0.049 | 0.962535 | 0.985405 |
| 7881 | 10519747 | <a href="#">NM_011348</a>          | <a href="#">20349</a>     | sema domain, immunoglobulin do  | <a href="#">Sema3e</a>        | 1.013 | 0.336  | 0.746229 | 0.892285 |
| 7882 | 10562439 | <a href="#">NM_026181</a>          | <a href="#">67471</a>     | G patch domain containing 1     | <a href="#">Gpatch1</a>       | 1.013 | -0.269 | 0.795682 | 0.916955 |
| 7883 | 10567460 | <a href="#">XM_355934</a>          | <a href="#">381917</a>    | dynein, axonemal, heavy chain   | <a href="#">Dnahc3</a>        | 1.013 | 0.379  | 0.715596 | 0.875402 |
| 7884 | 10499080 | <a href="#">NM_001081093</a>       | <a href="#">99889</a>     | ADP-ribosylation factor intera  | <a href="#">Arfp1</a>         | 1.013 | 0.061  | 0.95338  | 0.982042 |
| 7885 | 10590389 | <a href="#">NM_010918</a>          | <a href="#">18087</a>     | natural killer tumor recogniti  | <a href="#">Nktr</a>          | 1.013 | 0.412  | 0.692636 | 0.865144 |
| 7886 | 10463296 | <a href="#">NM_001113562</a>       | <a href="#">66388</a>     | cutC copper transporter homolo  | <a href="#">Cute</a>          | 1.013 | -0.099 | 0.923941 | 0.96976  |
| 7887 | 10384595 | <a href="#">BC109353</a>           | <a href="#">237694</a>    | RIKEN cDNA 4932414J04 gene      | <a href="#">4932414J04Rik</a> | 1.013 | -0.013 | 0.990053 | 0.995679 |
| 7888 | 10418729 | <a href="#">NM_009937</a>          | <a href="#">382864</a>    | collagen-like tail subunit (si  | <a href="#">Colq</a>          | 1.013 | 0.359  | 0.73016  | 0.883361 |
| 7889 | 10575745 | <a href="#">NM_177700</a>          | <a href="#">234776</a>    | ATM interactor                  | <a href="#">Atmin</a>         | 1.013 | 0.24   | 0.817297 | 0.927212 |

|      |          |                                    |                           |                                   |                                    |       |        |          |          |
|------|----------|------------------------------------|---------------------------|-----------------------------------|------------------------------------|-------|--------|----------|----------|
| 7890 | 10562705 | <a href="#">BC100510</a>           | <a href="#">434181</a>    | predicted gene, EG434181          | <a href="#">EG434181</a>           | 1.013 | 0.188  | 0.856207 | 0.941981 |
| 7891 | 10364984 | <a href="#">NM_010731</a>          | <a href="#">16969</a>     | zinc finger and BTB domain con    | <a href="#">Zbtb7a</a>             | 1.013 | 0.212  | 0.838197 | 0.934421 |
| 7892 | 10551519 | <a href="#">NM_030562</a>          | <a href="#">80749</a>     | leucine rich repeat and fibron    | <a href="#">Lrfn1</a>              | 1.013 | 0.014  | 0.989097 | 0.995308 |
| 7893 | 10356345 | <a href="#">NM_010933</a>          | <a href="#">18159</a>     | natriuretic peptide precursor     | <a href="#">Nppc</a>               | 1.013 | 0.665  | 0.526851 | 0.762787 |
| 7894 | 10499891 | <a href="#">NM_009265</a>          | <a href="#">20754</a>     | small proline-rich protein 1B     | <a href="#">Sprr1b</a>             | 1.013 | 0.402  | 0.699069 | 0.868099 |
| 7895 | 10445758 | <a href="#">NM_001033922</a>       | <a href="#">224840</a>    | triggering receptor expressed     | <a href="#">Trem14</a>             | 1.013 | 0.485  | 0.64224  | 0.838036 |
| 7896 | 10445695 | <a href="#">NM_020048</a>          | <a href="#">56771</a>     | mediator complex subunit 20       | <a href="#">Med20</a>              | 1.013 | 0.817  | 0.44006  | 0.699124 |
| 7897 | 10440926 | <a href="#">NM_001099738</a>       | <a href="#">246738</a>    | open reading frame 28             | <a href="#">ORF28</a>              | 1.013 | -0.017 | 0.987118 | 0.994703 |
| 7898 | 10399232 | <a href="#">ENSMUST00000101635</a> | <a href="#">100038522</a> | predicted gene,<br>ENSMUSG0000007 | <a href="#">ENSMUSG00000073242</a> | 1.013 | 0.552  | 0.597363 | 0.810488 |
| 7899 | 10517028 | <a href="#">NM_025667</a>          | <a href="#">52174</a>     | DNA segment, Chr 4, ERATO<br>Doi  | <a href="#">D4Erd196e</a>          | 1.013 | -0.591 | 0.572521 | 0.796254 |
| 7900 | 10552288 | <a href="#">NM_021387</a>          | <a href="#">58188</a>     | V-set and transmembrane<br>domain | <a href="#">Vstm2b</a>             | 1.013 | 0.377  | 0.717284 | 0.876366 |
| 7901 | 10520362 | <a href="#">NM_153526</a>          | <a href="#">231070</a>    | insulin induced gene 1            | <a href="#">Insig1</a>             | 1.013 | -0.327 | 0.753125 | 0.895971 |
| 7902 | 10361133 |                                    |                           |                                   |                                    | 1.013 | -0.162 | 0.875641 | 0.950829 |
| 7903 | 10564294 | <a href="#">BC116270</a>           | <a href="#">330554</a>    | myotubularin related protein 1    | <a href="#">Mtmr15</a>             | 1.013 | -0.06  | 0.953684 | 0.982088 |
| 7904 | 10586614 | <a href="#">BC039571</a>           | <a href="#">75697</a>     | RIKEN cDNA 3300001A09             | <a href="#">3300001A09Rik</a>      | 1.013 | 0.255  | 0.806129 | 0.921832 |
| 7905 | 10564909 | <a href="#">NM_172903</a>          | <a href="#">140481</a>    | mannosidase 2, alpha 2            | <a href="#">Man2a2</a>             | 1.013 | 0.275  | 0.791341 | 0.915073 |
| 7906 | 10379006 | <a href="#">NM_183286</a>          | <a href="#">70451</a>     | dehydrogenase/reductase (SDR f    | <a href="#">Dhrs13</a>             | 1.012 | -0.12  | 0.907553 | 0.963723 |
| 7907 | 10508036 | <a href="#">NM_175246</a>          | <a href="#">76793</a>     | Smad nuclear interacting prote    | <a href="#">Snip1</a>              | 1.012 | 0.124  | 0.904752 | 0.962956 |
| 7908 | 10373009 | <a href="#">NM_025537</a>          | <a href="#">66399</a>     | Ts translation elongation fact    | <a href="#">Tsfm</a>               | 1.012 | 0.015  | 0.988164 | 0.995129 |
| 7909 | 10472814 | <a href="#">NM_201366</a>          | <a href="#">381371</a>    | gene model 1631, (NCBI)           | <a href="#">Gm1631</a>             | 1.012 | 0.836  | 0.429836 | 0.690652 |
| 7910 | 10437773 |                                    |                           |                                   |                                    | 1.012 | 0.434  | 0.677247 | 0.856571 |
| 7911 | 10465103 | <a href="#">NM_023781</a>          | <a href="#">75555</a>     | RIKEN cDNA 1700020D05<br>gene     | <a href="#">1700020D05Rik</a>      | 1.012 | 0.363  | 0.726841 | 0.881629 |
| 7912 | 10605938 | <a href="#">NM_020621</a>          | <a href="#">57385</a>     | pyrimidinergic receptor P2Y, G    | <a href="#">P2ry4</a>              | 1.012 | 0.436  | 0.675622 | 0.855911 |
| 7913 | 10438171 | <a href="#">NM_026909</a>          | <a href="#">69009</a>     | THAP domain containing 7          | <a href="#">Thap7</a>              | 1.012 | -0.359 | 0.730038 | 0.883264 |
| 7914 | 10414360 | <a href="#">NM_010705</a>          | <a href="#">16854</a>     | lectin, galactose binding, sol    | <a href="#">Lgals3</a>             | 1.012 | -0.001 | 0.999238 | 0.999589 |
| 7915 | 10515378 | <a href="#">NM_146256</a>          | <a href="#">242642</a>    | 4-hydroxyphenylpyruvate dioxyg    | <a href="#">Hpd1</a>               | 1.012 | 0.319  | 0.758959 | 0.899117 |
| 7916 | 10510836 | <a href="#">NM_201226</a>          | <a href="#">72946</a>     | leucine rich repeat containing    | <a href="#">Lrrc47</a>             | 1.012 | -0.112 | 0.913824 | 0.96595  |
| 7917 | 10476893 | <a href="#">NM_028986</a>          | <a href="#">74533</a>     | GDNF-inducible zinc finger pro    | <a href="#">Gzf1</a>               | 1.012 | -0.365 | 0.725442 | 0.881081 |
| 7918 | 10427679 | <a href="#">NM_177123</a>          | <a href="#">320277</a>    | sperm flagellar 2                 | <a href="#">Spef2</a>              | 1.012 | -0.343 | 0.741044 | 0.889595 |
| 7919 | 10460645 | <a href="#">NM_022012</a>          | <a href="#">26403</a>     | mitogen-activated protein kina    | <a href="#">Map3k11</a>            | 1.012 | -0.423 | 0.684759 | 0.860588 |
| 7920 | 10374590 | <a href="#">NM_134014</a>          | <a href="#">103573</a>    | exportin 1, CRM1 homolog<br>(yeas | <a href="#">Xpo1</a>               | 1.012 | 0.23   | 0.824441 | 0.929508 |
| 7921 | 10425814 | <a href="#">NM_172610</a>          | <a href="#">223726</a>    | metallophosphoesterase domain     | <a href="#">Mpped1</a>             | 1.012 | 0.206  | 0.842532 | 0.936185 |
| 7922 | 10376358 | <a href="#">NM_024480</a>          | <a href="#">79566</a>     | SH3 binding domain protein 5 1    | <a href="#">Sh3bp5l</a>            | 1.012 | 0.363  | 0.726699 | 0.881595 |
| 7923 | 10415576 | <a href="#">NM_029498</a>          | <a href="#">76007</a>     | zinc finger, MYM-type 2           | <a href="#">Zmym2</a>              | 1.012 | -0.049 | 0.96254  | 0.985405 |
| 7924 | 10579144 | <a href="#">BC125568</a>           | <a href="#">74549</a>     | RIKEN cDNA 9130404D08<br>gene     | <a href="#">9130404D08Rik</a>      | 1.012 | 0.285  | 0.783484 | 0.912068 |
| 7925 | 10430282 | <a href="#">NM_007583</a>          | <a href="#">12300</a>     | calcium channel, voltage-depen    | <a href="#">Cacng2</a>             | 1.012 | 0.302  | 0.770876 | 0.905387 |
| 7926 | 10414154 |                                    |                           |                                   |                                    | 1.012 | 0.849  | 0.423    | 0.685287 |
| 7927 | 10518364 | <a href="#">XM_204069</a>          | <a href="#">277692</a>    | similar to Rps19 protein          | <a href="#">LOC277692</a>          | 1.012 | -0.368 | 0.723164 | 0.879931 |
| 7928 | 10348639 | <a href="#">NM_146490</a>          | <a href="#">258483</a>    | olfactory receptor 1411           | <a href="#">Olf1411</a>            | 1.012 | 0.719  | 0.495018 | 0.739955 |
| 7929 | 10507635 | <a href="#">NM_153105</a>          | <a href="#">242653</a>    | claudin 19                        | <a href="#">Cldn19</a>             | 1.012 | 0.206  | 0.842295 | 0.936059 |
| 7930 | 10458340 | <a href="#">NM_010415</a>          | <a href="#">15200</a>     | heparin-binding EGF-like growt    | <a href="#">Hbegf</a>              | 1.012 | 0.139  | 0.893237 | 0.957788 |
| 7931 | 10394735 | <a href="#">NM_027959</a>          | <a href="#">71853</a>     | protein disulfide isomerase as    | <a href="#">Pdia6</a>              | 1.012 | -0.056 | 0.956906 | 0.983559 |
| 7932 | 10589030 | <a href="#">NM_001114119</a>       | <a href="#">69232</a>     | glutamine-rich 1                  | <a href="#">Qrich1</a>             | 1.012 | 0.122  | 0.906094 | 0.963405 |
| 7933 | 10595668 | <a href="#">NM_207260</a>          | <a href="#">330998</a>    | ankyrin repeat domain 34C         | <a href="#">Ankrd34c</a>           | 1.012 | 0.219  | 0.832742 | 0.932699 |
| 7934 | 10477495 | <a href="#">NM_001012392</a>       | <a href="#">228801</a>    | cDNA sequence U46068              | <a href="#">U46068</a>             | 1.012 | 0.337  | 0.745512 | 0.891679 |
| 7935 | 10587266 | <a href="#">NM_010295</a>          | <a href="#">14629</a>     | glutamate-cysteine ligase, cat    | <a href="#">Gclc</a>               | 1.012 | -0.568 | 0.587461 | 0.804278 |
| 7936 | 10446549 | <a href="#">XM_001480132</a>       | <a href="#">622645</a>    | predicted gene, EG622645          | <a href="#">EG622645</a>           | 1.012 | -0.054 | 0.958363 | 0.984334 |
| 7937 | 10561994 | <a href="#">NM_029377</a>          | <a href="#">75660</a>     | lin-37 homolog (C. elegans)       | <a href="#">Lin37</a>              | 1.012 | -0.387 | 0.710153 | 0.873031 |
| 7938 | 10396367 | <a href="#">NM_011384</a>          | <a href="#">20476</a>     | sine oculis-related homeobox 6    | <a href="#">Six6</a>               | 1.012 | -0.165 | 0.873626 | 0.949568 |
| 7939 | 10571878 | <a href="#">BC030500</a>           | <a href="#">234290</a>    | cDNA sequence BC030500            | <a href="#">BC030500</a>           | 1.012 | 0.597  | 0.569025 | 0.793724 |
| 7940 | 10451077 |                                    |                           |                                   |                                    | 1.012 | 0.174  | 0.866609 | 0.946757 |
| 7941 | 10559713 | <a href="#">NM_001039532</a>       | <a href="#">654801</a>    | zinc finger protein 784           | <a href="#">Zfp784</a>             | 1.012 | 0.507  | 0.627455 | 0.83052  |

|      |          |                                    |                           |                                |                                    |       |        |          |          |
|------|----------|------------------------------------|---------------------------|--------------------------------|------------------------------------|-------|--------|----------|----------|
| 7942 | 10601473 | <a href="#">NM_026565</a>          | <a href="#">68117</a>     | apolipoprotein O-like          | <a href="#">Apool</a>              | 1.012 | -0.264 | 0.799391 | 0.919009 |
| 7943 | 10558248 | <a href="#">NM_009774</a>          | <a href="#">12237</a>     | budding uninhibited by benzimi | <a href="#">Bub3</a>               | 1.012 | 0.002  | 0.998616 | 0.999521 |
| 7944 | 10350689 | <a href="#">NM_010877</a>          | <a href="#">17970</a>     | neutrophil cytosolic factor 2  | <a href="#">Ncf2</a>               | 1.012 | 0.006  | 0.995758 | 0.998271 |
| 7945 | 10410311 | <a href="#">NM_001001186</a>       | <a href="#">408065</a>    | zinc finger protein 456        | <a href="#">Zfp456</a>             | 1.012 | 0.153  | 0.882813 | 0.953745 |
| 7946 | 10546817 | <a href="#">BC116438</a>           | <a href="#">243612</a>    | RIKEN cDNA D630042P16 gene     | <a href="#">D630042P16Rik</a>      | 1.012 | 0.274  | 0.791695 | 0.915198 |
| 7947 | 10448483 | <a href="#">NM_010947</a>          | <a href="#">18209</a>     | netrin 2-like (chicken)        | <a href="#">Ntn2l</a>              | 1.012 | 0.129  | 0.900587 | 0.960747 |
| 7948 | 10454306 | <a href="#">NM_011755</a>          | <a href="#">22694</a>     | zinc finger protein 35         | <a href="#">Zfp35</a>              | 1.012 | 0.009  | 0.992707 | 0.99722  |
| 7949 | 10396346 | <a href="#">NM_026327</a>          | <a href="#">67708</a>     | RIKEN cDNA 1810048J11 gene     | <a href="#">1810048J11Rik</a>      | 1.012 | 0.125  | 0.904165 | 0.962767 |
| 7950 | 10497682 | <a href="#">XM_001475546</a>       | <a href="#">435726</a>    | potassium large conductance ca | <a href="#">Kenmb3</a>             | 1.012 | 0.036  | 0.972366 | 0.98815  |
| 7951 | 10444407 | <a href="#">NM_007425</a>          | <a href="#">11596</a>     | advanced glycosylation end pro | <a href="#">Ager</a>               | 1.012 | 0.38   | 0.71462  | 0.875126 |
| 7952 | 10555722 | <a href="#">NM_147104</a>          | <a href="#">259108</a>    | olfactory receptor 550         | <a href="#">Olf550</a>             | 1.012 | 0.525  | 0.615381 | 0.822218 |
| 7953 | 10521085 | <a href="#">ENSMUST00000065707</a> | <a href="#">433873</a>    | predicted gene, EG433873       | <a href="#">EG433873</a>           | 1.012 | -0.031 | 0.976362 | 0.990137 |
| 7954 | 10391359 | <a href="#">NM_146030</a>          | <a href="#">217198</a>    | pleckstrin homology domain con | <a href="#">Plekhh3</a>            | 1.012 | 0.148  | 0.886407 | 0.955393 |
| 7955 | 10543058 | <a href="#">NM_198854</a>          | <a href="#">13395</a>     | distal-less homeobox 5         | <a href="#">Dlx5</a>               | 1.012 | -0.018 | 0.986143 | 0.994146 |
| 7956 | 10559702 | <a href="#">NM_026741</a>          | <a href="#">68490</a>     | zinc finger protein 579        | <a href="#">Zfp579</a>             | 1.012 | 0.217  | 0.834324 | 0.933071 |
| 7957 | 10448127 | <a href="#">ENSMUST00000061516</a> | <a href="#">14293</a>     | formyl peptide receptor 1      | <a href="#">Fpr1</a>               | 1.012 | 0.151  | 0.884375 | 0.95453  |
| 7958 | 10426169 | <a href="#">NM_027905</a>          | <a href="#">223776</a>    | RIKEN cDNA 1300018J18 gene     | <a href="#">1300018J18Rik</a>      | 1.012 | 0.342  | 0.741872 | 0.889893 |
| 7959 | 10516051 | <a href="#">NM_007598</a>          | <a href="#">12331</a>     | CAP, adenylate cyclase-associa | <a href="#">Cap1</a>               | 1.012 | -0.407 | 0.695924 | 0.866433 |
| 7960 | 10409567 | <a href="#">NM_145976</a>          | <a href="#">212937</a>    | TRAF-interacting protein with  | <a href="#">Tifab</a>              | 1.012 | 0.43   | 0.679625 | 0.857705 |
| 7961 | 10481491 | <a href="#">NM_030244</a>          | <a href="#">72500</a>     | immediate early response 5-lik | <a href="#">Ier5l</a>              | 1.012 | 0.146  | 0.887921 | 0.955819 |
| 7962 | 10392033 |                                    |                           |                                |                                    | 1.012 | -0.134 | 0.897185 | 0.95959  |
| 7963 | 10394929 | <a href="#">AK132630</a>           | <a href="#">668662</a>    | predicted gene, EG668662       | <a href="#">EG668662</a>           | 1.012 | 0.042  | 0.967428 | 0.987082 |
| 7964 | 10400570 |                                    |                           |                                |                                    | 1.012 | 0.472  | 0.651119 | 0.843737 |
| 7965 | 10424676 | <a href="#">NM_008529</a>          | <a href="#">17069</a>     | lymphocyte antigen 6 complex,  | <a href="#">Ly6e</a>               | 1.012 | -0.072 | 0.944284 | 0.977948 |
| 7966 | 10465485 | <a href="#">NM_007953</a>          | <a href="#">26379</a>     | estrogen related receptor, alp | <a href="#">Esrra</a>              | 1.012 | 0.078  | 0.939997 | 0.976656 |
| 7967 | 10446397 | <a href="#">XR_035029</a>          | <a href="#">100043871</a> | hypothetical protein LOC100043 | <a href="#">LOC100043871</a>       | 1.012 | -0.018 | 0.986496 | 0.994397 |
| 7968 | 10411448 | <a href="#">NM_145455</a>          | <a href="#">218490</a>    | basic transcription factor 3   | <a href="#">Btf3</a>               | 1.012 | -0.04  | 0.9695   | 0.987616 |
| 7969 | 10447557 | <a href="#">NM_175349</a>          | <a href="#">106557</a>    | lactate dehydrogenase A-like 6 | <a href="#">Ldhal6b</a>            | 1.012 | 0.634  | 0.545879 | 0.777611 |
| 7970 | 10520706 | <a href="#">NM_021447</a>          | <a href="#">58522</a>     | tripartite motif-containing 54 | <a href="#">Trim54</a>             | 1.012 | 0.198  | 0.848472 | 0.938584 |
| 7971 | 10384572 | <a href="#">NM_173752</a>          | <a href="#">216551</a>    | RIKEN cDNA 1110067D22 gene     | <a href="#">1110067D22Rik</a>      | 1.012 | 0.286  | 0.782895 | 0.911739 |
| 7972 | 10542665 | <a href="#">NM_009908</a>          | <a href="#">12764</a>     | cytidine monophospho-N-acetyl  | <a href="#">Cmas</a>               | 1.012 | 0.037  | 0.971772 | 0.988148 |
| 7973 | 10566400 | <a href="#">NM_147060</a>          | <a href="#">259062</a>    | olfactory receptor 667         | <a href="#">Olf667</a>             | 1.012 | 0.154  | 0.881531 | 0.953086 |
| 7974 | 10389387 |                                    |                           |                                |                                    | 1.012 | 0.175  | 0.866184 | 0.946491 |
| 7975 | 10581577 | <a href="#">NM_178380</a>          | <a href="#">64340</a>     | DEAH (Asp-Glu-Ala-His) box     | <a href="#">Dhx38</a>              | 1.012 | -0.274 | 0.792084 | 0.915332 |
| 7976 | 10420614 | <a href="#">AK081218</a>           | <a href="#">791379</a>    | predicted gene, ENSMUSG0000005 | <a href="#">ENSMUSG00000052400</a> | 1.012 | 0.279  | 0.788076 | 0.913843 |
| 7977 | 10356771 | <a href="#">NM_178051</a>          | <a href="#">69821</a>     | MTERF domain containing 2      | <a href="#">Mterfd2</a>            | 1.012 | -0.262 | 0.800497 | 0.91941  |
| 7978 | 10394102 | <a href="#">NM_025793</a>          | <a href="#">66840</a>     | Wdr45 like                     | <a href="#">Wdr45l</a>             | 1.012 | -0.279 | 0.788341 | 0.913849 |
| 7979 | 10398759 | <a href="#">BC115831</a>           | <a href="#">74691</a>     | tudor domain containing 9      | <a href="#">Tdrd9</a>              | 1.012 | 0.527  | 0.613754 | 0.821135 |
| 7980 | 10478285 | <a href="#">ENSMUST00000067526</a> | <a href="#">77288</a>     | RIKEN cDNA 9430021M05 gene     | <a href="#">9430021M05Rik</a>      | 1.012 | 0.097  | 0.925681 | 0.970574 |
| 7981 | 10579199 | <a href="#">NM_001007570</a>       | <a href="#">73095</a>     | solute carrier family 25, memb | <a href="#">Slc25a42</a>           | 1.012 | -0.144 | 0.889279 | 0.956449 |
| 7982 | 10359084 |                                    |                           |                                |                                    | 1.012 | 0.351  | 0.735531 | 0.886814 |
| 7983 | 10455824 | <a href="#">ENSMUST00000097569</a> | <a href="#">100038410</a> | predicted gene, ENSMUSG0000007 | <a href="#">ENSMUSG00000073558</a> | 1.011 | -0.276 | 0.790481 | 0.914692 |
| 7984 | 10504362 | <a href="#">NM_172866</a>          | <a href="#">242406</a>    | RGPI retrograde golgi transpor | <a href="#">Rgp1</a>               | 1.011 | 0.016  | 0.987892 | 0.994998 |
| 7985 | 10357814 | <a href="#">NM_144530</a>          | <a href="#">70579</a>     | zinc finger CCCH type containi | <a href="#">Zc3h11a</a>            | 1.011 | 0.133  | 0.897844 | 0.959787 |
| 7986 | 10384622 | <a href="#">NM_153078</a>          | <a href="#">216565</a>    | EH domain binding protein 1    | <a href="#">Ehbp1</a>              | 1.011 | 0.101  | 0.922187 | 0.968977 |
| 7987 | 10453766 | <a href="#">NM_153552</a>          | <a href="#">225160</a>    | THO complex 1                  | <a href="#">Thoc1</a>              | 1.011 | -0.004 | 0.997288 | 0.998988 |
| 7988 | 10479311 | <a href="#">NM_178750</a>          | <a href="#">269397</a>    | synovial sarcoma translocation | <a href="#">Ss18l1</a>             | 1.011 | 0.162  | 0.87548  | 0.950704 |
| 7989 | 10588936 | <a href="#">NM_133744</a>          | <a href="#">72454</a>     | coiled-coil domain containing  | <a href="#">Ccdc71</a>             | 1.011 | -0.01  | 0.992125 | 0.996887 |
| 7990 | 10495201 | <a href="#">NM_026774</a>          | <a href="#">68576</a>     | hepatitis B virus x interactin | <a href="#">Hbxip</a>              | 1.011 | -0.16  | 0.877238 | 0.951586 |
| 7991 | 10456891 | <a href="#">NM_007505</a>          | <a href="#">11946</a>     | ATP synthase, H+ transporting, | <a href="#">Atp5a1</a>             | 1.011 | -0.518 | 0.619947 | 0.825151 |
| 7992 | 10414970 | <a href="#">AK043253</a>           | <a href="#">211027</a>    | RIKEN cDNA A730076H11 gene     | <a href="#">A730076H11Rik</a>      | 1.011 | 0.512  | 0.624142 | 0.828379 |

|      |          |                                    |                        |                                |                               |       |        |          |          |
|------|----------|------------------------------------|------------------------|--------------------------------|-------------------------------|-------|--------|----------|----------|
| 7993 | 10385719 | <a href="#">NM_175255</a>          | <a href="#">77371</a>  | SEC24 related gene family, mem | <a href="#">Sec24a</a>        | 1.011 | 0.166  | 0.872375 | 0.949019 |
| 7994 | 10369825 | <a href="#">XM_356468</a>          | <a href="#">382371</a> | predicted gene, EG382371       | <a href="#">EG382371</a>      | 1.011 | 0.218  | 0.833551 | 0.932911 |
| 7995 | 10569717 |                                    |                        |                                |                               | 1.011 | 1.005  | 0.347305 | 0.621483 |
| 7996 | 10573461 | <a href="#">NM_010062</a>          | <a href="#">13423</a>  | deoxyribonuclease II alpha     | <a href="#">Dnase2a</a>       | 1.011 | 0.338  | 0.745113 | 0.891615 |
| 7997 | 10514588 | <a href="#">ENSMUST00000097964</a> | <a href="#">545660</a> | RIKEN cDNA I0C0044D17 gene     | <a href="#">I0C0044D17Rik</a> | 1.011 | 0.002  | 0.998561 | 0.999521 |
| 7998 | 10563026 | <a href="#">NM_029410</a>          | <a href="#">75736</a>  | BCL2-like 12 (proline rich)    | <a href="#">Bcl2l12</a>       | 1.011 | -0.215 | 0.835928 | 0.933525 |
| 7999 | 10484927 | <a href="#">NM_026721</a>          | <a href="#">68427</a>  | solute carrier family 39 (meta | <a href="#">Slc39a13</a>      | 1.011 | 0.452  | 0.664337 | 0.850284 |
| 8000 | 10344743 | <a href="#">BC066997</a>           | <a href="#">76982</a>  | RIKEN cDNA 3110035E14 gene     | <a href="#">3110035E14Rik</a> | 1.011 | 0.269  | 0.795433 | 0.916955 |
| 8001 | 10540650 | <a href="#">NM_026552</a>          | <a href="#">68089</a>  | actin related protein 2/3 comp | <a href="#">Arpc4</a>         | 1.011 | -0.391 | 0.707166 | 0.872175 |
| 8002 | 10370651 | <a href="#">NM_181681</a>          | <a href="#">216152</a> | cDNA sequence BC005764         | <a href="#">BC005764</a>      | 1.011 | 0.336  | 0.746611 | 0.892388 |
| 8003 | 10496485 | <a href="#">NM_007917</a>          | <a href="#">13684</a>  | eukaryotic translation initiat | <a href="#">Eif4e</a>         | 1.011 | 0.191  | 0.853453 | 0.940713 |
| 8004 | 10357773 | <a href="#">NM_008575</a>          | <a href="#">17248</a>  | transformed mouse 3T3 cell dou | <a href="#">Mdm4</a>          | 1.011 | 0.105  | 0.919004 | 0.967837 |
| 8005 | 10526274 | <a href="#">NM_025362</a>          | <a href="#">66114</a>  | Williams-Beuren syndrome chrom | <a href="#">Wbscr18</a>       | 1.011 | -0.354 | 0.733454 | 0.885927 |
| 8006 | 10551102 | <a href="#">NM_001081294</a>       | <a href="#">623131</a> | proline rich 19                | <a href="#">Prr19</a>         | 1.011 | 0.425  | 0.683018 | 0.859827 |
| 8007 | 10499200 | <a href="#">ENSMUST00000023846</a> | <a href="#">74485</a>  | RIKEN cDNA 4933430H15 gene     | <a href="#">4933430H15Rik</a> | 1.011 | 0.355  | 0.732762 | 0.885293 |
| 8008 | 10552845 | <a href="#">NM_029406</a>          | <a href="#">68845</a>  | PIH1 domain containing 1       | <a href="#">Pih1d1</a>        | 1.011 | -0.505 | 0.628404 | 0.830964 |
| 8009 | 10548097 | <a href="#">NM_177003</a>          | <a href="#">319801</a> | RIKEN cDNA 9630033F20 gene     | <a href="#">9630033F20Rik</a> | 1.011 | 0.375  | 0.718142 | 0.87698  |
| 8010 | 10547553 | <a href="#">NM_153396</a>          | <a href="#">194401</a> | microtubule associated monoxyg | <a href="#">Mical3</a>        | 1.011 | 0.106  | 0.918566 | 0.967805 |
| 8011 | 10517689 | <a href="#">NM_145384</a>          | <a href="#">212555</a> | PQ loop repeat containing 2    | <a href="#">Pqlc2</a>         | 1.011 | 0.145  | 0.888481 | 0.956033 |
| 8012 | 10383767 | <a href="#">NM_152818</a>          | <a href="#">74309</a>  | oxysterol binding protein 2    | <a href="#">Osbp2</a>         | 1.011 | 0.443  | 0.670828 | 0.85389  |
| 8013 | 10369901 | <a href="#">ENSMUST00000009214</a> | <a href="#">71236</a>  | rhabdoid tumor deletion region | <a href="#">Rtdr1</a>         | 1.011 | 0.397  | 0.702709 | 0.869626 |
| 8014 | 10405918 | <a href="#">NM_001013769</a>       | <a href="#">380855</a> | regulator of sex limited prote | <a href="#">Rsl1</a>          | 1.011 | -0.034 | 0.973803 | 0.98872  |
| 8015 | 10588137 | <a href="#">NM_028258</a>          | <a href="#">72507</a>  | DAZ interacting protein 1-like | <a href="#">Dzip11</a>        | 1.011 | 0.118  | 0.909058 | 0.963765 |
| 8016 | 10546723 |                                    |                        |                                |                               | 1.011 | 0.686  | 0.51403  | 0.754437 |
| 8017 | 10390147 | <a href="#">NM_007867</a>          | <a href="#">13394</a>  | distal-less homeobox 4         | <a href="#">Dlx4</a>          | 1.011 | -0.302 | 0.771541 | 0.905749 |
| 8018 | 10400710 | <a href="#">NM_001033236</a>       | <a href="#">207965</a> | gene model 71, (NCBI)          | <a href="#">Gm71</a>          | 1.011 | -0.586 | 0.575828 | 0.797128 |
| 8019 | 10448441 | <a href="#">NM_172935</a>          | <a href="#">245847</a> | amidohydrolase domain containi | <a href="#">Amdhd2</a>        | 1.011 | 0.159  | 0.877705 | 0.951715 |
| 8020 | 10576140 | <a href="#">NM_026014</a>          | <a href="#">67177</a>  | chromatin licensing and DNA re | <a href="#">Cdt1</a>          | 1.011 | -0.232 | 0.822619 | 0.929111 |
| 8021 | 10489422 | <a href="#">NM_008435</a>          | <a href="#">16538</a>  | K+ voltage-gated channel, subf | <a href="#">Kens1</a>         | 1.011 | -0.192 | 0.852676 | 0.940561 |
| 8022 | 10483828 | <a href="#">NM_001081033</a>       | <a href="#">241489</a> | phosphodiesterase 11A          | <a href="#">Pde11a</a>        | 1.011 | 0.198  | 0.848718 | 0.938708 |
| 8023 | 10589166 | <a href="#">NM_134420</a>          | <a href="#">171429</a> | solute carrier family 26, memb | <a href="#">Slc26a6</a>       | 1.011 | 0.318  | 0.759332 | 0.899156 |
| 8024 | 10567464 | <a href="#">XM_355934</a>          | <a href="#">381917</a> | dynein, axonemal, heavy chain  | <a href="#">Dnahc3</a>        | 1.011 | 0.451  | 0.665217 | 0.850823 |
| 8025 | 10492205 | <a href="#">NM_001005509</a>       | <a href="#">229317</a> | eukaryotic translation initiat | <a href="#">Eif2a</a>         | 1.011 | -0.017 | 0.9868   | 0.994561 |
| 8026 | 10502201 | <a href="#">AK040169</a>           | <a href="#">319637</a> | RIKEN cDNA A430072C10 gene     | <a href="#">A430072C10Rik</a> | 1.011 | 0.379  | 0.715702 | 0.875402 |
| 8027 | 10391732 | <a href="#">BC019948</a>           | <a href="#">237943</a> | G patch domain containing 8    | <a href="#">Gpatch8</a>       | 1.011 | -0.064 | 0.950571 | 0.980959 |
| 8028 | 10408168 | <a href="#">NM_013924</a>          | <a href="#">30946</a>  | activator of basal transcripti | <a href="#">Abt1</a>          | 1.011 | -0.08  | 0.938487 | 0.976028 |
| 8029 | 10509147 | <a href="#">NM_178389</a>          | <a href="#">74246</a>  | galactose-4-epimerase, UDP     | <a href="#">Gale</a>          | 1.011 | 0.194  | 0.851171 | 0.94011  |
| 8030 | 10365469 | <a href="#">ENSMUST00000116049</a> | <a href="#">67341</a>  | achaete-scute complex homolog  | <a href="#">Ascl4</a>         | 1.011 | -0.096 | 0.9258   | 0.970651 |
| 8031 | 10493664 | <a href="#">ENSMUST00000029548</a> | <a href="#">77595</a>  | nucleoporin 210-like           | <a href="#">Nup210l</a>       | 1.011 | 0.773  | 0.464034 | 0.717953 |
| 8032 | 10477406 | <a href="#">NM_194357</a>          | <a href="#">378700</a> | antimicrobial peptide RYA3     | <a href="#">RP23-244H7.9</a>  | 1.011 | 0.199  | 0.848035 | 0.938472 |
| 8033 | 10530017 |                                    |                        |                                |                               | 1.011 | 0.3    | 0.772457 | 0.906272 |
| 8034 | 10423742 | <a href="#">NM_001039368</a>       | <a href="#">17749</a>  | polymerase (RNA) II (DNA direc | <a href="#">Polr2k</a>        | 1.011 | -0.448 | 0.667059 | 0.851389 |
| 8035 | 10461979 | <a href="#">NM_013467</a>          | <a href="#">11668</a>  | aldehyde dehydrogenase family  | <a href="#">Aldh1a1</a>       | 1.011 | 0.264  | 0.799133 | 0.918907 |
| 8036 | 10607250 | <a href="#">NM_029943</a>          | <a href="#">77622</a>  | apurinic/aprimidinic endonucl  | <a href="#">Apex2</a>         | 1.011 | 0.409  | 0.694366 | 0.86574  |
| 8037 | 10427590 | <a href="#">NM_148938</a>          | <a href="#">20512</a>  | solute carrier family 1 (glial | <a href="#">Slc1a3</a>        | 1.011 | 0.061  | 0.953013 | 0.981889 |
| 8038 | 10523955 | <a href="#">NM_026106</a>          | <a href="#">13486</a>  | down-regulator of transcriptio | <a href="#">Drl</a>           | 1.011 | -0.01  | 0.992292 | 0.99696  |
| 8039 | 10583343 | <a href="#">XR_032517</a>          | <a href="#">244710</a> | similar to eukaryotic translat | <a href="#">LOC244710</a>     | 1.011 | -0.577 | 0.581795 | 0.800451 |
| 8040 | 10545812 | <a href="#">NM_178639</a>          | <a href="#">94282</a>  | sideroflexin 5                 | <a href="#">Sfxn5</a>         | 1.011 | 0.431  | 0.679277 | 0.857678 |
| 8041 | 10429495 | <a href="#">NM_008415</a>          | <a href="#">16469</a>  | jerky                          | <a href="#">Jrk</a>           | 1.011 | -0.348 | 0.738001 | 0.888273 |
| 8042 | 10479112 | <a href="#">NM_022000</a>          | <a href="#">14683</a>  | GNAS (guanine nucleotide bindi | <a href="#">Gnas</a>          | 1.011 | 0.031  | 0.976183 | 0.990137 |
| 8043 | 10405628 | <a href="#">NM_028904</a>          | <a href="#">74386</a>  | RMI1, RecQ mediated genome     | <a href="#">Rmi1</a>          | 1.011 | -0.374 | 0.719427 | 0.877797 |
| 8044 | 10366605 | <a href="#">NM_026171</a>          | <a href="#">67450</a>  | MMS19, VCP-like                | <a href="#">Mms19</a>         | 1.011 | 0.080  | 0.931440 | 0.977750 |

|      |          |                                    |                           |                                |                                    |       |        |          |          |
|------|----------|------------------------------------|---------------------------|--------------------------------|------------------------------------|-------|--------|----------|----------|
| 8044 | 1050099  | <a href="#">NM_020171</a>          | <a href="#">07452</a>     | nuclear YCF-like               | <a href="#">NYL</a>                | 1.011 | 0.067  | 0.931449 | 0.972737 |
| 8045 | 10477103 | <a href="#">ENSMUST00000089083</a> | <a href="#">791417</a>    | predicted gene, OTTMUSG0000001 | <a href="#">OTTMUSG00000015846</a> | 1.011 | 0.252  | 0.80809  | 0.922738 |
| 8046 | 10508860 | <a href="#">NM_016981</a>          | <a href="#">20544</a>     | solute carrier family 9 (sodi  | <a href="#">Slc9a1</a>             | 1.011 | 0.31   | 0.765393 | 0.902421 |
| 8047 | 10357097 | <a href="#">XR_033060</a>          | <a href="#">675394</a>    | similar to Elongation factor 2 | <a href="#">LOC675394</a>          | 1.011 | 0.506  | 0.628075 | 0.830847 |
| 8048 | 10529636 | <a href="#">NM_022416</a>          | <a href="#">64293</a>     | serine/threonine kinase 32B    | <a href="#">Stk32b</a>             | 1.011 | 0.06   | 0.953709 | 0.982088 |
| 8049 | 10486681 | <a href="#">NM_028799</a>          | <a href="#">74176</a>     | transglutaminase 5             | <a href="#">Tgm5</a>               | 1.011 | 0.441  | 0.67197  | 0.854437 |
| 8050 | 10493912 | <a href="#">NM_001081200</a>       | <a href="#">381457</a>    | cornulin                       | <a href="#">Crnn</a>               | 1.011 | 0.775  | 0.462774 | 0.71721  |
| 8051 | 10522134 | <a href="#">NM_024471</a>          | <a href="#">79464</a>     | lipoic acid synthetase         | <a href="#">Lias</a>               | 1.011 | -0.426 | 0.682725 | 0.859827 |
| 8052 | 10377790 | <a href="#">NM_001114971</a>       | <a href="#">216867</a>    | solute carrier family 16 (mono | <a href="#">Slc16a11</a>           | 1.011 | 0.211  | 0.838846 | 0.934783 |
| 8053 | 10349733 | <a href="#">NM_175294</a>          | <a href="#">98415</a>     | nuclear casein kinase and cycl | <a href="#">Nucks1</a>             | 1.011 | 0.167  | 0.872003 | 0.948845 |
| 8054 | 10427659 |                                    |                           |                                |                                    | 1.011 | 0.114  | 0.912323 | 0.965068 |
| 8055 | 10362062 | <a href="#">ENSMUST00000042671</a> | <a href="#">76924</a>     | RIKEN cDNA 1700021A07 gene     | <a href="#">1700021A07Rik</a>      | 1.011 | 0.463  | 0.656955 | 0.846475 |
| 8056 | 10374323 | <a href="#">AK012991</a>           | <a href="#">100038540</a> | predicted gene, ENSMUSG0000007 | <a href="#">ENSMUSG00000070560</a> | 1.01  | -0.102 | 0.921424 | 0.968656 |
| 8057 | 10560181 | <a href="#">NM_133831</a>          | <a href="#">68077</a>     | glioma tumor suppressor candid | <a href="#">Gltscr2</a>            | 1.01  | -0.064 | 0.950965 | 0.981078 |
| 8058 | 10415649 |                                    |                           |                                |                                    | 1.01  | -0.024 | 0.981603 | 0.992092 |
| 8059 | 10448842 | <a href="#">NM_027880</a>          | <a href="#">71718</a>     | TEL2, telomere maintenance 2,  | <a href="#">Telo2</a>              | 1.01  | 0.451  | 0.664988 | 0.850739 |
| 8060 | 10542321 | <a href="#">NM_026360</a>          | <a href="#">67755</a>     | DEAD (Asp-Glu-Ala-Asp) box pol | <a href="#">Ddx47</a>              | 1.01  | -0.152 | 0.883471 | 0.954108 |
| 8061 | 10415742 | <a href="#">NM_027436</a>          | <a href="#">70478</a>     | mitochondrial intermediate pep | <a href="#">Mipep</a>              | 1.01  | -0.324 | 0.754893 | 0.896835 |
| 8062 | 10476889 | <a href="#">NM_001110159</a>       | <a href="#">56488</a>     | NTF2-related export protein 1  | <a href="#">Nxt1</a>               | 1.01  | -0.481 | 0.644722 | 0.839358 |
| 8063 | 10576062 | <a href="#">NM_020605</a>          | <a href="#">57340</a>     | junctionophilin 3              | <a href="#">Jph3</a>               | 1.01  | 0.222  | 0.830693 | 0.932075 |
| 8064 | 10557206 | <a href="#">NM_175023</a>          | <a href="#">19647</a>     | retinoblastoma binding protein | <a href="#">Rbbp6</a>              | 1.01  | -0.021 | 0.983452 | 0.992843 |
| 8065 | 10568921 | <a href="#">NM_026769</a>          | <a href="#">68566</a>     | calcyon neuron-specific vesicu | <a href="#">Caly</a>               | 1.01  | 0.59   | 0.573124 | 0.796617 |
| 8066 | 10408677 | <a href="#">NM_201358</a>          | <a href="#">380840</a>    | LYR motif containing 4         | <a href="#">Lym4</a>               | 1.01  | -0.289 | 0.780762 | 0.910961 |
| 8067 | 10599335 | <a href="#">NM_026902</a>          | <a href="#">68995</a>     | malignant T cell amplified seq | <a href="#">Mets1</a>              | 1.01  | 0.402  | 0.699389 | 0.868342 |
| 8068 | 10580135 |                                    |                           |                                |                                    | 1.01  | 0.591  | 0.572482 | 0.796254 |
| 8069 | 10440288 | <a href="#">NM_028059</a>          | <a href="#">72020</a>     | zinc finger protein 654        | <a href="#">Zfp654</a>             | 1.01  | -0.042 | 0.967944 | 0.987137 |
| 8070 | 10549447 | <a href="#">NM_001081113</a>       | <a href="#">320727</a>    | importin 8                     | <a href="#">Ipo8</a>               | 1.01  | -0.255 | 0.80604  | 0.921787 |
| 8071 | 10557498 | <a href="#">BC093505</a>           | <a href="#">68952</a>     | RIKEN cDNA 1500016O10 gene     | <a href="#">1500016O10Rik</a>      | 1.01  | 0.67   | 0.523975 | 0.760561 |
| 8072 | 10485241 | <a href="#">NM_183220</a>          | <a href="#">329470</a>    | 1-aminocyclopropane-1-carboxyl | <a href="#">Accs</a>               | 1.01  | 0.225  | 0.828069 | 0.930769 |
| 8073 | 10390196 | <a href="#">NM_008081</a>          | <a href="#">14422</a>     | beta-1,4-N-acetyl-galactosamin | <a href="#">B4galnt2</a>           | 1.01  | 0.252  | 0.807722 | 0.922567 |
| 8074 | 10428753 |                                    |                           |                                |                                    | 1.01  | 0.219  | 0.832545 | 0.932679 |
| 8075 | 10431284 | <a href="#">NM_001033274</a>       | <a href="#">223770</a>    | bromodomain containing 1       | <a href="#">Brd1</a>               | 1.01  | -0.095 | 0.927202 | 0.971253 |
| 8076 | 10489018 | <a href="#">NM_133242</a>          | <a href="#">170791</a>    | RNA binding motif protein 39   | <a href="#">Rbm39</a>              | 1.01  | 0.109  | 0.916202 | 0.966842 |
| 8077 | 10548375 | <a href="#">NM_020008</a>          | <a href="#">56644</a>     | C-type lectin domain family 7, | <a href="#">Clec7a</a>             | 1.01  | 0.144  | 0.889062 | 0.95642  |
| 8078 | 10604106 | <a href="#">NM_001033234</a>       | <a href="#">194854</a>    | gene model 9, (NCBI)           | <a href="#">Gm9</a>                | 1.01  | 0.276  | 0.790602 | 0.914692 |
| 8079 | 10522627 | <a href="#">NM_199032</a>          | <a href="#">381644</a>    | centrosomal protein 135        | <a href="#">Cep135</a>             | 1.01  | -0.39  | 0.707935 | 0.872288 |
| 8080 | 10474825 | <a href="#">NM_026412</a>          | <a href="#">51944</a>     | DNA segment, Chr 2, ERATO Doi  | <a href="#">D2Erd750e</a>          | 1.01  | -0.351 | 0.735794 | 0.886874 |
| 8081 | 10495001 | <a href="#">NM_172684</a>          | <a href="#">229675</a>    | rosbin, round spermatid basic  | <a href="#">Rsbn1</a>              | 1.01  | -0.135 | 0.896449 | 0.959489 |
| 8082 | 10604424 | <a href="#">NM_153532</a>          | <a href="#">208968</a>    | zinc finger protein 280c       | <a href="#">Zfp280c</a>            | 1.01  | 0.066  | 0.948915 | 0.980236 |
| 8083 | 10445514 | <a href="#">NM_207666</a>          | <a href="#">106565</a>    | delta-like 2 homolog (Drosophi | <a href="#">Dlk2</a>               | 1.01  | 0.28   | 0.787554 | 0.913342 |
| 8084 | 10427772 | <a href="#">NM_033074</a>          | <a href="#">110960</a>    | threonyl-tRNA synthetase       | <a href="#">Tars</a>               | 1.01  | -0.634 | 0.545748 | 0.777543 |
| 8085 | 10486789 | <a href="#">NM_080459</a>          | <a href="#">140476</a>    | stereocilin                    | <a href="#">Strc</a>               | 1.01  | -0.015 | 0.988364 | 0.995236 |
| 8086 | 10347662 | <a href="#">NM_177056</a>          | <a href="#">319998</a>    | transmembrane protein 198      | <a href="#">Tmem198</a>            | 1.01  | 0.043  | 0.966549 | 0.986746 |
| 8087 | 10391957 | <a href="#">NM_011719</a>          | <a href="#">22412</a>     | wingless-type MMTV integration | <a href="#">Wnt9b</a>              | 1.01  | 0.061  | 0.953124 | 0.981917 |
| 8088 | 10406031 | <a href="#">NM_145376</a>          | <a href="#">210992</a>    | lysophosphatidylcholine acyltr | <a href="#">Lpcat1</a>             | 1.01  | 0.171  | 0.86855  | 0.947362 |
| 8089 | 10361979 | <a href="#">NM_001025392</a>       | <a href="#">72567</a>     | BCL2-associated transcription  | <a href="#">Belaf1</a>             | 1.01  | -0.226 | 0.827289 | 0.930659 |
| 8090 | 10478291 | <a href="#">NM_026499</a>          | <a href="#">67996</a>     | splicing factor, arginine/seri | <a href="#">Sfrs6</a>              | 1.01  | 0.353  | 0.734437 | 0.886559 |
| 8091 | 10402752 | <a href="#">NM_027360</a>          | <a href="#">70257</a>     | RIKEN cDNA 2010107E04 gene     | <a href="#">2010107E04Rik</a>      | 1.01  | -0.128 | 0.901828 | 0.961392 |
| 8092 | 10424781 | <a href="#">NM_023168</a>          | <a href="#">66168</a>     | glutamate receptor, ionotropic | <a href="#">Grina</a>              | 1.01  | -0.241 | 0.815906 | 0.926256 |
| 8093 | 10364548 |                                    |                           |                                |                                    | 1.01  | 0.327  | 0.752994 | 0.895959 |
| 8094 | 10472621 | <a href="#">NM_001081548</a>       | <a href="#">68795</a>     | zinc finger protein 650        | <a href="#">Zfp650</a>             | 1.01  | -0.053 | 0.959274 | 0.984606 |
| 8095 | 10529995 | <a href="#">NM_007839</a>          | <a href="#">13204</a>     | DEAH (Asp-Glu-Ala-His) box     | <a href="#">Dhx15</a>              | 1.01  | -0.046 | 0.964311 | 0.9859   |

|      |          |                                    |                           | pol                               |                                    |       |        |          |          |
|------|----------|------------------------------------|---------------------------|-----------------------------------|------------------------------------|-------|--------|----------|----------|
| 8096 | 10433241 | <a href="#">NM_010061</a>          | <a href="#">13419</a>     | deoxyribonuclease I               | <a href="#">Dnase1</a>             | 1.01  | 0.604  | 0.564506 | 0.790721 |
| 8097 | 10602223 | <a href="#">NM_026247</a>          | <a href="#">67574</a>     | asparagine-linked glycosylatio    | <a href="#">Alg13</a>              | 1.01  | -0.215 | 0.835878 | 0.933525 |
| 8098 | 10501084 | <a href="#">NM_001044382</a>       | <a href="#">246691</a>    | prokineticin 1                    | <a href="#">Prok1</a>              | 1.01  | 0.452  | 0.664281 | 0.850267 |
| 8099 | 10428682 | <a href="#">ENSMUST00000066358</a> | <a href="#">791337</a>    | predicted gene,<br>ENSMUSG0000005 | <a href="#">ENSMUSG00000053749</a> | 1.01  | 0.092  | 0.929357 | 0.972164 |
| 8100 | 10489985 | <a href="#">NM_015731</a>          | <a href="#">11981</a>     | ATPase, class II, type 9A         | <a href="#">Atp9a</a>              | 1.01  | -0.159 | 0.877987 | 0.951715 |
| 8101 | 10531944 | <a href="#">ENSMUST00000069263</a> | <a href="#">791327</a>    | predicted gene,<br>ENSMUSG0000005 | <a href="#">ENSMUSG00000058736</a> | 1.01  | 0.462  | 0.657473 | 0.84686  |
| 8102 | 10430058 | <a href="#">NM_019396</a>          | <a href="#">54151</a>     | cysteine and histidine rich 1     | <a href="#">Cyhr1</a>              | 1.01  | -0.228 | 0.826105 | 0.929952 |
| 8103 | 10598369 | <a href="#">NM_175097</a>          | <a href="#">54630</a>     | prickle homolog 3 (Drosophila)    | <a href="#">Prickle3</a>           | 1.01  | 0.266  | 0.797535 | 0.917931 |
| 8104 | 10504763 | <a href="#">NM_172693</a>          | <a href="#">230145</a>    | UDP-N-acetyl-alpha-D-galactosa    | <a href="#">Galnt12</a>            | 1.01  | 0.021  | 0.98394  | 0.993077 |
| 8105 | 10477325 | <a href="#">NM_001003961</a>       | <a href="#">13436</a>     | DNA methyltransferase 3B          | <a href="#">Dnmt3b</a>             | 1.01  | -0.014 | 0.989141 | 0.995308 |
| 8106 | 10498076 | <a href="#">NM_001004176</a>       | <a href="#">433586</a>    | mastermind like 3 (Drosophila)    | <a href="#">Mam13</a>              | 1.01  | 0.453  | 0.664006 | 0.850267 |
| 8107 | 10532248 | <a href="#">XM_001476621</a>       | <a href="#">671564</a>    | ring finger protein 212           | <a href="#">Rnf212</a>             | 1.01  | 0.8    | 0.449385 | 0.706889 |
| 8108 | 10386821 | <a href="#">ENSMUST00000101077</a> | <a href="#">103880</a>    | RIKEN cDNA A530017D24<br>gene     | <a href="#">A530017D24Rik</a>      | 1.01  | 0.326  | 0.753738 | 0.896244 |
| 8109 | 10456136 | <a href="#">NM_019508</a>          | <a href="#">56069</a>     | interleukin 17B                   | <a href="#">Il17b</a>              | 1.01  | 0.262  | 0.80089  | 0.919467 |
| 8110 | 10510552 | <a href="#">NM_001085492</a>       | <a href="#">68703</a>     | arginine glutamic acid dipepti    | <a href="#">Rere</a>               | 1.01  | 0.126  | 0.902909 | 0.962108 |
| 8111 | 10584582 | <a href="#">ENSMUST00000098870</a> | <a href="#">100038567</a> | predicted gene,<br>ENSMUSG0000007 | <a href="#">ENSMUSG00000074421</a> | 1.01  | 0.22   | 0.831714 | 0.932437 |
| 8112 | 10397377 | <a href="#">NM_001081423</a>       | <a href="#">320244</a>    | tubulin tyrosine ligase-like f    | <a href="#">Ttl5</a>               | 1.01  | -0.161 | 0.876514 | 0.951096 |
| 8113 | 10500253 | <a href="#">NM_027541</a>          | <a href="#">70767</a>     | PRP3 pre-mRNA processing<br>facto | <a href="#">Prpf3</a>              | 1.01  | 0.152  | 0.883471 | 0.954108 |
| 8114 | 10569896 | <a href="#">BC118542</a>           | <a href="#">70192</a>     | CD209g antigen                    | <a href="#">Cd209g</a>             | 1.01  | 0.233  | 0.82194  | 0.92863  |
| 8115 | 10517579 | <a href="#">NM_001033979</a>       | <a href="#">435811</a>    | low density lipoprotein recept    | <a href="#">Ldlrad2</a>            | 1.01  | 0.382  | 0.713739 | 0.874677 |
| 8116 | 10550059 | <a href="#">NM_029809</a>          | <a href="#">381845</a>    | RIKEN cDNA 2310014L17 gene        | <a href="#">2310014L17Rik</a>      | 1.01  | 0.177  | 0.86451  | 0.946153 |
| 8117 | 10550833 | <a href="#">NM_001045486</a>       | <a href="#">210135</a>    | zinc finger protein 180           | <a href="#">Zfp180</a>             | 1.01  | -0.093 | 0.928324 | 0.971746 |
| 8118 | 10372668 | <a href="#">NM_010786</a>          | <a href="#">17246</a>     | transformed mouse 3T3 cell dou    | <a href="#">Mdm2</a>               | 1.01  | 0.026  | 0.980004 | 0.991919 |
| 8119 | 10435543 | <a href="#">ENSMUST00000039855</a> | <a href="#">224139</a>    | golgi autoantigen, golgin subf    | <a href="#">Golgb1</a>             | 1.01  | -0.522 | 0.617278 | 0.823029 |
| 8120 | 10375537 | <a href="#">NM_001110148</a>       | <a href="#">17308</a>     | mannoside acetylglucosaminyltr    | <a href="#">Mgat1</a>              | 1.01  | 0.099  | 0.923897 | 0.96976  |
| 8121 | 10474875 | <a href="#">NM_029617</a>          | <a href="#">76464</a>     | cancer susceptibility candidat    | <a href="#">Casc5</a>              | 1.01  | -0.01  | 0.992018 | 0.996827 |
| 8122 | 10593988 | <a href="#">NM_007713</a>          | <a href="#">102414</a>    | CDC-like kinase 3                 | <a href="#">Clk3</a>               | 1.009 | -0.208 | 0.840992 | 0.935759 |
| 8123 | 10603312 | <a href="#">ENSMUST00000066557</a> | <a href="#">54651</a>     | ubiquitin specific peptidase 2    | <a href="#">Usp27x</a>             | 1.009 | 0.17   | 0.86942  | 0.947676 |
| 8124 | 10356482 | <a href="#">XR_031409</a>          | <a href="#">383542</a>    | hypothetical gene supported by    | <a href="#">LOC383542</a>          | 1.009 | 0.165  | 0.873335 | 0.949372 |
| 8125 | 10489936 | <a href="#">NM_009628</a>          | <a href="#">11538</a>     | activity-dependent neuroprotec    | <a href="#">Adnp</a>               | 1.009 | 0.239  | 0.817818 | 0.92753  |
| 8126 | 10406050 | <a href="#">NM_010020</a>          | <a href="#">13162</a>     | solute carrier family 6 (neuro    | <a href="#">Slc6a3</a>             | 1.009 | 0.117  | 0.909822 | 0.964056 |
| 8127 | 10373052 |                                    |                           |                                   |                                    | 1.009 | 0.334  | 0.74765  | 0.892822 |
| 8128 | 10424674 | <a href="#">AJ011022</a>           | <a href="#">15202</a>     | hematopoietic cell transcript     | <a href="#">Hemt1</a>              | 1.009 | 0.407  | 0.695494 | 0.866211 |
| 8129 | 10416371 | <a href="#">NM_175116</a>          | <a href="#">67168</a>     | purinergic receptor P2Y, G-pro    | <a href="#">P2ry5</a>              | 1.009 | -0.343 | 0.74157  | 0.889732 |
| 8130 | 10526564 | <a href="#">NM_027356</a>          | <a href="#">70240</a>     | UFMI-specific peptidase 1         | <a href="#">Ufsp1</a>              | 1.009 | -0.312 | 0.764023 | 0.90173  |
| 8131 | 10512640 | <a href="#">NM_015828</a>          | <a href="#">50798</a>     | glucosamine                       | <a href="#">Gne</a>                | 1.009 | -0.305 | 0.76881  | 0.904    |
| 8132 | 10514240 | <a href="#">NM_172426</a>          | <a href="#">76376</a>     | solute carrier family 24 (sodi    | <a href="#">Slc24a2</a>            | 1.009 | 0.628  | 0.549225 | 0.779541 |
| 8133 | 10597598 | <a href="#">NM_001037749</a>       | <a href="#">382113</a>    | solute carrier family 22 (orga    | <a href="#">Slc22a14</a>           | 1.009 | 0.386  | 0.710655 | 0.873102 |
| 8134 | 10461251 | <a href="#">NM_001013019</a>       | <a href="#">68852</a>     | RIKEN cDNA 1110067I12 gene        | <a href="#">1110067I12Rik</a>      | 1.009 | -0.157 | 0.879925 | 0.952396 |
| 8135 | 10464030 | <a href="#">NM_007417</a>          | <a href="#">11551</a>     | adrenergic receptor, alpha 2a     | <a href="#">Adra2a</a>             | 1.009 | 0.305  | 0.76915  | 0.904298 |
| 8136 | 10531488 | <a href="#">NM_017367</a>          | <a href="#">12453</a>     | cyclin I                          | <a href="#">Ceni</a>               | 1.009 | -0.559 | 0.59329  | 0.807893 |
| 8137 | 10596489 | <a href="#">ENSMUST00000116026</a> | <a href="#">436090</a>    | G protein-coupled receptor 62     | <a href="#">Gpr62</a>              | 1.009 | -0.05  | 0.961454 | 0.985172 |
| 8138 | 10573747 | <a href="#">NM_007406</a>          | <a href="#">11513</a>     | adenylate cyclase 7               | <a href="#">Adcy7</a>              | 1.009 | 0.237  | 0.819346 | 0.928264 |
| 8139 | 10350149 | <a href="#">NM_021467</a>          | <a href="#">21952</a>     | troponin I, skeletal, slow 1      | <a href="#">Tnni1</a>              | 1.009 | 0.385  | 0.711426 | 0.873563 |
| 8140 | 10509998 | <a href="#">NM_009541</a>          | <a href="#">22642</a>     | zinc finger and BTB domain con    | <a href="#">Zbtb17</a>             | 1.009 | 0.437  | 0.674655 | 0.855467 |
| 8141 | 10420780 | <a href="#">NM_021480</a>          | <a href="#">58865</a>     | L-threonine dehydrogenase         | <a href="#">Tdh</a>                | 1.009 | 0.289  | 0.780389 | 0.910806 |
| 8142 | 10410690 |                                    |                           |                                   |                                    | 1.009 | 0.661  | 0.529237 | 0.76441  |
| 8143 | 10400002 | <a href="#">ENSMUST00000061679</a> | <a href="#">70844</a>     | RIKEN cDNA 4921508M14<br>gene     | <a href="#">4921508M14Rik</a>      | 1.009 | -0.081 | 0.937371 | 0.975526 |
| 8144 | 10406714 | <a href="#">NM_011021</a>          | <a href="#">18420</a>     | orthopedia homolog (Drosophila    | <a href="#">Otp</a>                | 1.009 | 0.492  | 0.637565 | 0.835648 |
| 8145 | 10510720 | <a href="#">NM_009079</a>          | <a href="#">19934</a>     | ribosomal protein L22             | <a href="#">Rpl22</a>              | 1.009 | -0.081 | 0.937633 | 0.975655 |
| 8146 | 10514697 |                                    |                           |                                   |                                    | 1.009 | 0.685  | 0.514998 | 0.754817 |

|      |          |                                    |                           |                                   |                                    |       |        |          |          |
|------|----------|------------------------------------|---------------------------|-----------------------------------|------------------------------------|-------|--------|----------|----------|
| 8147 | 10474004 |                                    |                           |                                   |                                    | 1.000 | 0.893  | 0.447559 | 0.705227 |
| 8148 | 10455682 | <a href="#">AY692449</a>           | <a href="#">225497</a>    | gene model 93, (NCBI)             | <a href="#">Gm93</a>               | 1.009 | 0.362  | 0.727933 | 0.88203  |
| 8149 | 10387255 | <a href="#">AK033665</a>           | <a href="#">100038433</a> | predicted gene,<br>ENSMUSG0000007 | <a href="#">ENSMUSG00000072807</a> | 1.009 | 0.028  | 0.978582 | 0.991413 |
| 8150 | 10456516 |                                    |                           |                                   |                                    | 1.009 | -0.18  | 0.861763 | 0.94442  |
| 8151 | 10533720 | <a href="#">NM_030701</a>          | <a href="#">80885</a>     | G protein-coupled receptor 109    | <a href="#">Gpr109a</a>            | 1.009 | 0.54   | 0.605607 | 0.816017 |
| 8152 | 10405950 | <a href="#">NM_027123</a>          | <a href="#">69577</a>     | FAST kinase domains 3             | <a href="#">Fastkd3</a>            | 1.009 | -0.07  | 0.945954 | 0.978614 |
| 8153 | 10577782 | <a href="#">NM_001081187</a>       | <a href="#">330723</a>    | HtrA serine peptidase 4           | <a href="#">Htra4</a>              | 1.009 | 0.169  | 0.87074  | 0.948568 |
| 8154 | 10581448 | <a href="#">AK089165</a>           | <a href="#">319446</a>    | dipeptidase 2                     | <a href="#">Dpep2</a>              | 1.009 | -0.018 | 0.986153 | 0.994146 |
| 8155 | 10507394 | <a href="#">NM_175244</a>          | <a href="#">76608</a>     | HECT domain containing 3          | <a href="#">Hectd3</a>             | 1.009 | 0.004  | 0.996746 | 0.998777 |
| 8156 | 10456922 | <a href="#">ENSMUST00000044622</a> | <a href="#">71423</a>     | RIKEN cDNA 5430411K18<br>gene     | <a href="#">5430411K18Rik</a>      | 1.009 | 0.602  | 0.565686 | 0.791744 |
| 8157 | 10489872 | <a href="#">NM_008420</a>          | <a href="#">16500</a>     | potassium voltage gated channe    | <a href="#">Kcnbl</a>              | 1.009 | 0.473  | 0.650503 | 0.843249 |
| 8158 | 10438975 | <a href="#">BC031419</a>           | <a href="#">268880</a>    | expressed sequence AI480653       | <a href="#">AI480653</a>           | 1.009 | -0.017 | 0.986714 | 0.994522 |
| 8159 | 10393364 | <a href="#">NM_030206</a>          | <a href="#">114886</a>    | cytoglobin                        | <a href="#">Cymb</a>               | 1.009 | 0.747  | 0.478939 | 0.729132 |
| 8160 | 10596967 | <a href="#">NM_172774</a>          | <a href="#">235610</a>    | RIKEN cDNA 6620401K05<br>gene     | <a href="#">6620401K05Rik</a>      | 1.009 | -0.367 | 0.724093 | 0.88046  |
| 8161 | 10559513 |                                    |                           |                                   |                                    | 1.009 | 0.489  | 0.639395 | 0.836375 |
| 8162 | 10425364 | <a href="#">NM_009716</a>          | <a href="#">11911</a>     | activating transcription facto    | <a href="#">Atf4</a>               | 1.009 | -0.079 | 0.939002 | 0.976218 |
| 8163 | 10477450 | <a href="#">NM_008953</a>          | <a href="#">19194</a>     | parotid secretory protein         | <a href="#">Psp</a>                | 1.009 | 0.519  | 0.61925  | 0.82476  |
| 8164 | 10413919 | <a href="#">NM_001001796</a>       | <a href="#">107751</a>    | paired related homeobox protei    | <a href="#">Prrx11</a>             | 1.009 | 0.586  | 0.575602 | 0.797076 |
| 8165 | 10582719 | <a href="#">NM_001081337</a>       | <a href="#">244668</a>    | signal-induced proliferation-a    | <a href="#">Sipa112</a>            | 1.009 | -0.013 | 0.990122 | 0.995679 |
| 8166 | 10413381 | <a href="#">NM_080856</a>          | <a href="#">142687</a>    | ankyrin repeat and SOCS box-co    | <a href="#">Asb14</a>              | 1.009 | 0.306  | 0.768549 | 0.903793 |
| 8167 | 10367033 | <a href="#">NM_198035</a>          | <a href="#">320080</a>    | zinc finger and BTB domain con    | <a href="#">Zbtb39</a>             | 1.009 | 0.244  | 0.813665 | 0.925035 |
| 8168 | 10551758 | <a href="#">ENSMUST00000063585</a> | <a href="#">442797</a>    | RIKEN cDNA 6330444E15 gene        | <a href="#">6330444E15Rik</a>      | 1.009 | 0.236  | 0.819641 | 0.928312 |
| 8169 | 10412960 | <a href="#">BC069846</a>           | <a href="#">105428</a>    | expressed sequence AA536717       | <a href="#">AA536717</a>           | 1.009 | -0.498 | 0.633532 | 0.833323 |
| 8170 | 10450145 | <a href="#">NM_013585</a>          | <a href="#">16912</a>     | proteasome (prosome, macropain    | <a href="#">Psmb9</a>              | 1.009 | 0.04   | 0.969243 | 0.987586 |
| 8171 | 10580577 | <a href="#">NM_008393</a>          | <a href="#">16373</a>     | Iroquois related homeobox 3 (D    | <a href="#">Irx3</a>               | 1.009 | 0.444  | 0.670298 | 0.853559 |
| 8172 | 10494281 | <a href="#">NM_026489</a>          | <a href="#">67981</a>     | HORMA domain containing 1         | <a href="#">Hormad1</a>            | 1.009 | 0.215  | 0.835352 | 0.933323 |
| 8173 | 10419850 | <a href="#">NM_207131</a>          | <a href="#">110794</a>    | CCAAT/enhancer binding<br>protein | <a href="#">Cebpe</a>              | 1.009 | 0.383  | 0.712526 | 0.874059 |
| 8174 | 10580082 | <a href="#">ENSMUST00000071067</a> | <a href="#">442802</a>    | RIKEN cDNA C330011M18<br>gene     | <a href="#">C330011M18Rik</a>      | 1.009 | 0.416  | 0.689294 | 0.863619 |
| 8175 | 10360410 | <a href="#">NM_001005520</a>       | <a href="#">404222</a>    | olfactory receptor 244            | <a href="#">Olfr244</a>            | 1.009 | 0.383  | 0.712904 | 0.874189 |
| 8176 | 10353165 |                                    |                           |                                   |                                    | 1.009 | -0.045 | 0.965463 | 0.986124 |
| 8177 | 10374185 | <a href="#">NM_146014</a>          | <a href="#">216527</a>    | cerebral cavernous malformatio    | <a href="#">Ccm2</a>               | 1.009 | -0.579 | 0.57992  | 0.799181 |
| 8178 | 10504865 | <a href="#">NM_010569</a>          | <a href="#">16348</a>     | inversin                          | <a href="#">Invs</a>               | 1.009 | 0.309  | 0.765793 | 0.902563 |
| 8179 | 10346668 | <a href="#">NM_001037725</a>       | <a href="#">72750</a>     | amyotrophic lateral sclerosis     | <a href="#">Als2cr13</a>           | 1.009 | -0.063 | 0.951551 | 0.981156 |
| 8180 | 10586284 | <a href="#">NM_028906</a>          | <a href="#">74388</a>     | dipeptidylpeptidase 8             | <a href="#">Dpp8</a>               | 1.009 | -0.048 | 0.963359 | 0.985684 |
| 8181 | 10595197 | <a href="#">NM_009611</a>          | <a href="#">11470</a>     | actin-like 7a                     | <a href="#">Act7a</a>              | 1.009 | 0.405  | 0.69743  | 0.867333 |
| 8182 | 10442123 |                                    |                           |                                   |                                    | 1.009 | 0.668  | 0.524733 | 0.761127 |
| 8183 | 10363331 |                                    |                           |                                   |                                    | 1.009 | 0.045  | 0.965602 | 0.986218 |
| 8184 | 10420457 | <a href="#">NM_028643</a>          | <a href="#">68514</a>     | EF hand domain family A1          | <a href="#">Efha1</a>              | 1.009 | -0.293 | 0.777805 | 0.909568 |
| 8185 | 10495077 | <a href="#">ENSMUST00000070584</a> | <a href="#">75269</a>     | RIKEN cDNA 4930564D02<br>gene     | <a href="#">4930564D02Rik</a>      | 1.009 | 0.233  | 0.82192  | 0.92863  |
| 8186 | 10583952 | <a href="#">NM_178113</a>          | <a href="#">78658</a>     | non-SMC condensin II complex,     | <a href="#">Ncapd3</a>             | 1.009 | 0.052  | 0.959751 | 0.984908 |
| 8187 | 10525804 | <a href="#">NM_011596</a>          | <a href="#">21871</a>     | ATPase, H+ transporting, lysos    | <a href="#">Atp6v0a2</a>           | 1.009 | 0.047  | 0.963447 | 0.985684 |
| 8188 | 10450675 | <a href="#">NM_008207</a>          | <a href="#">15042</a>     | histocompatibility 2, T region    | <a href="#">H2-T24</a>             | 1.009 | 0.402  | 0.699564 | 0.868422 |
| 8189 | 10450126 | <a href="#">NM_001025387</a>       | <a href="#">14312</a>     | bromodomain containing 2          | <a href="#">Brd2</a>               | 1.008 | 0.105  | 0.919574 | 0.967948 |
| 8190 | 10597714 | <a href="#">NM_011887</a>          | <a href="#">24046</a>     | sodium channel, voltage-gated,    | <a href="#">Scn11a</a>             | 1.008 | -0.044 | 0.965924 | 0.986394 |
| 8191 | 10562942 | <a href="#">NM_029365</a>          | <a href="#">75613</a>     | mediator of RNA polymerase II     | <a href="#">Med25</a>              | 1.008 | 0.151  | 0.884378 | 0.95453  |
| 8192 | 10357986 | <a href="#">NM_007955</a>          | <a href="#">13924</a>     | protein tyrosine phosphatase,     | <a href="#">Ptrpv</a>              | 1.008 | 0.25   | 0.809327 | 0.923176 |
| 8193 | 10442393 | <a href="#">AK017296</a>           | <a href="#">100036538</a> | predicted gene,<br>ENSMUSG0000005 | <a href="#">ENSMUSG00000054651</a> | 1.008 | -0.072 | 0.944345 | 0.977948 |
| 8194 | 10388337 | <a href="#">NM_013625</a>          | <a href="#">18472</a>     | platelet-activating factor ace    | <a href="#">Pafah1b1</a>           | 1.008 | 0.049  | 0.962062 | 0.985362 |
| 8195 | 10487787 | <a href="#">NM_020014</a>          | <a href="#">14588</a>     | glial cell line derived neurot    | <a href="#">Gfra4</a>              | 1.008 | 0.225  | 0.828055 | 0.930769 |
| 8196 | 10458958 |                                    |                           |                                   |                                    | 1.008 | -0.129 | 0.900526 | 0.960731 |
| 8197 | 10511819 | <a href="#">NM_001033531</a>       | <a href="#">212390</a>    | kelch-like 32 (Drosophila)        | <a href="#">Klhl32</a>             | 1.008 | 0.07   | 0.945921 | 0.978614 |
| 8198 | 10560078 | <a href="#">NM_001081449</a>       | <a href="#">666085</a>    | vomeropasal 2 receptor 54         | <a href="#">Vmn2r54</a>            | 1.008 | 0.3    | 0.772407 | 0.906263 |

|      |          |                                    |                           |                                        |                                    |       |        |          |          |
|------|----------|------------------------------------|---------------------------|----------------------------------------|------------------------------------|-------|--------|----------|----------|
| 8199 | 10461156 | <a href="#">AK051045</a>           | <a href="#">83673</a>     | small nucleolar RNA host gene          | <a href="#">Snhg1</a>              | 1.008 | 0.212  | 0.838347 | 0.934421 |
| 8200 | 10456246 | <a href="#">XR_034153</a>          | <a href="#">638407</a>    | similar to 40S ribosomal prote         | <a href="#">LOC638407</a>          | 1.008 | -0.132 | 0.898676 | 0.960077 |
| 8201 | 10506118 | <a href="#">NM_146144</a>          | <a href="#">230484</a>    | ubiquitin specific peptdiase 1         | <a href="#">Usp1</a>               | 1.008 | -0.077 | 0.940773 | 0.977    |
| 8202 | 10511290 | <a href="#">NM_009400</a>          | <a href="#">21936</a>     | tumor necrosis factor receptor         | <a href="#">Tnfrsf18</a>           | 1.008 | 0.216  | 0.834901 | 0.933323 |
| 8203 | 10351658 | <a href="#">NM_007649</a>          | <a href="#">12506</a>     | CD48 antigen                           | <a href="#">Cd48</a>               | 1.008 | 0.318  | 0.759274 | 0.899156 |
| 8204 | 10550167 |                                    |                           |                                        |                                    | 1.008 | 0.098  | 0.9246   | 0.970306 |
| 8205 | 10566632 | <a href="#">NM_177216</a>          | <a href="#">320635</a>    | cytochrome b5 reductase 2              | <a href="#">Cyb5r2</a>             | 1.008 | 0.152  | 0.883209 | 0.954001 |
| 8206 | 10539211 | <a href="#">NM_178731</a>          | <a href="#">243499</a>    | leucine rich repeat transmembr         | <a href="#">Lrrtm4</a>             | 1.008 | -0.117 | 0.91015  | 0.964056 |
| 8207 | 10392787 | <a href="#">ENSMUST00000063993</a> | <a href="#">319819</a>    | RIKEN cDNA 4932435O22 gene             | <a href="#">4932435O22Rik</a>      | 1.008 | 0.256  | 0.804875 | 0.921052 |
| 8208 | 10380087 | <a href="#">NM_133215</a>          | <a href="#">170749</a>    | myotubularin related protein 4         | <a href="#">Mtmr4</a>              | 1.008 | -0.373 | 0.719925 | 0.878109 |
| 8209 | 10462303 | <a href="#">NM_183179</a>          | <a href="#">240595</a>    | potassium channel, subfamily V         | <a href="#">Kcnv2</a>              | 1.008 | 0.28   | 0.787302 | 0.913152 |
| 8210 | 10353288 | <a href="#">NM_025773</a>          | <a href="#">66799</a>     | ubiquitin-conjugating enzyme E         | <a href="#">Ube2w</a>              | 1.008 | -0.478 | 0.646514 | 0.840625 |
| 8211 | 10515528 | <a href="#">NM_026344</a>          | <a href="#">67728</a>     | DPH2 homolog ( <i>S. cerevisiae</i> )  | <a href="#">Dph2</a>               | 1.008 | 0.09   | 0.930941 | 0.972759 |
| 8212 | 10368845 | <a href="#">NM_029132</a>          | <a href="#">103268</a>    | RIKEN cDNA 2410017P07 gene             | <a href="#">2410017P07Rik</a>      | 1.008 | -0.23  | 0.824834 | 0.929565 |
| 8213 | 10418747 | <a href="#">NM_019975</a>          | <a href="#">56794</a>     | 2-hydroxyacyl-CoA lyase 1              | <a href="#">Hacl1</a>              | 1.008 | -0.155 | 0.881384 | 0.953061 |
| 8214 | 10450870 |                                    |                           |                                        |                                    | 1.008 | 0.282  | 0.785623 | 0.912507 |
| 8215 | 10542028 | <a href="#">NM_022657</a>          | <a href="#">64654</a>     | fibroblast growth factor 23            | <a href="#">Fgf23</a>              | 1.008 | 0.214  | 0.836472 | 0.933958 |
| 8216 | 10437963 | <a href="#">BC027550</a>           | <a href="#">72083</a>     | RIKEN cDNA 2410018G20 gene             | <a href="#">2410018G20Rik</a>      | 1.008 | -0.893 | 0.400426 | 0.666294 |
| 8217 | 10359635 | <a href="#">NM_178883</a>          | <a href="#">98376</a>     | SCY1-like 1 binding protein 1          | <a href="#">Scyl1bp1</a>           | 1.008 | 0.148  | 0.886444 | 0.955393 |
| 8218 | 10450858 | <a href="#">NM_001011813</a>       | <a href="#">258051</a>    | olfactory receptor 93                  | <a href="#">Olfr93</a>             | 1.008 | 0.352  | 0.735177 | 0.886784 |
| 8219 | 10599229 | <a href="#">NM_173779</a>          | <a href="#">245381</a>    | ankyrin repeat domain 58               | <a href="#">Ankrd58</a>            | 1.008 | 0.32   | 0.757966 | 0.898457 |
| 8220 | 10390701 | <a href="#">ENSMUST00000100494</a> | <a href="#">100037262</a> | predicted gene, OTTMUSG0000000         | <a href="#">OTTMUSG00000006457</a> | 1.008 | 0.291  | 0.779149 | 0.910184 |
| 8221 | 10510844 | <a href="#">NM_021499</a>          | <a href="#">59002</a>     | WD repeat domain 8                     | <a href="#">Wdr8</a>               | 1.008 | -0.031 | 0.976074 | 0.990137 |
| 8222 | 10428052 | <a href="#">NM_007637</a>          | <a href="#">12465</a>     | chaperonin subunit 5 (epsilon)         | <a href="#">Cct5</a>               | 1.008 | -0.465 | 0.65566  | 0.845958 |
| 8223 | 10409551 | <a href="#">NM_011097</a>          | <a href="#">18740</a>     | paired-like homeodomain transc         | <a href="#">Pitx1</a>              | 1.008 | -0.046 | 0.964626 | 0.985942 |
| 8224 | 10446001 | <a href="#">NM_183178</a>          | <a href="#">240121</a>    | fibronectin type 3 and SPRY do         | <a href="#">Fsd1</a>               | 1.008 | 0.097  | 0.92553  | 0.970539 |
| 8225 | 10507418 | <a href="#">NM_001111277</a>       | <a href="#">108067</a>    | eukaryotic translation initiat         | <a href="#">Eif2b3</a>             | 1.008 | -0.391 | 0.707096 | 0.872175 |
| 8226 | 10469816 | <a href="#">NM_031167</a>          | <a href="#">16181</a>     | interleukin 1 receptor antagon         | <a href="#">Il1m</a>               | 1.008 | 0.105  | 0.91925  | 0.967863 |
| 8227 | 10572251 | <a href="#">NM_032004</a>          | <a href="#">83984</a>     | testis-specific serine kinase          | <a href="#">Tsk6</a>               | 1.008 | 0.165  | 0.873307 | 0.949372 |
| 8228 | 10593628 | <a href="#">NM_175562</a>          | <a href="#">270160</a>    | RAB39, member RAS oncogene fam         | <a href="#">Rab39</a>              | 1.008 | 0.198  | 0.84817  | 0.938472 |
| 8229 | 10533844 | <a href="#">NM_030259</a>          | <a href="#">80291</a>     | Rab interacting lysosomal prot         | <a href="#">Rilpl2</a>             | 1.008 | -0.316 | 0.761058 | 0.900342 |
| 8230 | 10416989 | <a href="#">NM_021434</a>          | <a href="#">58245</a>     | G protein-coupled receptor 180         | <a href="#">Gpr180</a>             | 1.008 | -0.079 | 0.939164 | 0.976281 |
| 8231 | 10603005 | <a href="#">XR_033102</a>          | <a href="#">676160</a>    | similar to thyroid hormone rec         | <a href="#">LOC676160</a>          | 1.008 | 0.69   | 0.512007 | 0.75265  |
| 8232 | 10582287 | <a href="#">NM_007608</a>          | <a href="#">12352</a>     | carbonic anhydrase 5a, mitocho         | <a href="#">Car5a</a>              | 1.008 | 0.178  | 0.863838 | 0.945829 |
| 8233 | 10534585 | <a href="#">NM_018825</a>          | <a href="#">23921</a>     | SH2B adaptor protein 2                 | <a href="#">Sh2b2</a>              | 1.008 | 0.55   | 0.59868  | 0.811605 |
| 8234 | 10568078 | <a href="#">ENSMUST00000071268</a> | <a href="#">381921</a>    | TAO kinase 2                           | <a href="#">Taok2</a>              | 1.008 | 0.037  | 0.971212 | 0.988148 |
| 8235 | 10393836 | <a href="#">NM_133796</a>          | <a href="#">192662</a>    | Rho GDP dissociation inhibitor         | <a href="#">Arhgdia</a>            | 1.008 | -0.16  | 0.877059 | 0.95149  |
| 8236 | 10389245 | <a href="#">NM_172562</a>          | <a href="#">217031</a>    | transcriptional adaptor 2 (ADA         | <a href="#">Tada2l</a>             | 1.008 | -0.589 | 0.573604 | 0.796812 |
| 8237 | 10427205 | <a href="#">NM_021713</a>          | <a href="#">60315</a>     | melanocyte proliferating gene          | <a href="#">Myg1</a>               | 1.008 | -0.221 | 0.831466 | 0.932333 |
| 8238 | 10349744 | <a href="#">NM_145977</a>          | <a href="#">212980</a>    | solute carrier family 45, memb         | <a href="#">Slc45a3</a>            | 1.008 | 0.59   | 0.573512 | 0.79679  |
| 8239 | 10391196 | <a href="#">NM_177790</a>          | <a href="#">278304</a>    | zinc finger protein 385C               | <a href="#">Zfp385c</a>            | 1.008 | 0.438  | 0.674028 | 0.855133 |
| 8240 | 10535095 | <a href="#">NM_133349</a>          | <a href="#">100494</a>    | zinc finger, AN1-type domain 2         | <a href="#">Zfand2a</a>            | 1.008 | 0.266  | 0.797739 | 0.917953 |
| 8241 | 10427671 |                                    |                           |                                        |                                    | 1.008 | 0.297  | 0.774991 | 0.907674 |
| 8242 | 10566804 | <a href="#">NM_020050</a>          | <a href="#">56786</a>     | TMEM9 domain family, member B          | <a href="#">Tmem9b</a>             | 1.008 | -0.486 | 0.64135  | 0.837465 |
| 8243 | 10521543 | <a href="#">NM_026959</a>          | <a href="#">71116</a>     | syntaxin 18                            | <a href="#">Stx18</a>              | 1.008 | -0.062 | 0.952155 | 0.981389 |
| 8244 | 10524973 | <a href="#">BC104372</a>           | <a href="#">76792</a>     | RIKEN cDNA 2410131K14 gene             | <a href="#">2410131K14Rik</a>      | 1.008 | 0.105  | 0.919605 | 0.967948 |
| 8245 | 10508351 | <a href="#">NM_018774</a>          | <a href="#">54383</a>     | polyhomeotic-like 2 ( <i>Drosophil</i> | <a href="#">Phc2</a>               | 1.008 | -0.106 | 0.918252 | 0.967805 |
| 8246 | 10547995 | <a href="#">NM_009446</a>          | <a href="#">22144</a>     | tubulin, alpha 3A                      | <a href="#">Tuba3a</a>             | 1.008 | -0.201 | 0.846042 | 0.937284 |
| 8247 | 10593060 | <a href="#">NM_001081373</a>       | <a href="#">214552</a>    | centrosomal protein 164                | <a href="#">Cep164</a>             | 1.008 | 0.324  | 0.755316 | 0.897145 |
| 8248 | 10511139 | <a href="#">NM_026899</a>          | <a href="#">68991</a>     | Ssu72 RNA polymerase II CTD ph         | <a href="#">Ssu72</a>              | 1.008 | -0.631 | 0.547423 | 0.778445 |
| 8249 | 10404078 | <a href="#">NM_001033107</a>       | <a href="#">07863</a>     | expressed sequence C78330              | <a href="#">C78330</a>             | 1.008 | 0.308  | 0.766537 | 0.907074 |

|      |          |                                    |                           |                                    |                                    |       |        |          |          |
|------|----------|------------------------------------|---------------------------|------------------------------------|------------------------------------|-------|--------|----------|----------|
| 8247 | 10404720 | <a href="#">NM_001033122</a>       | <a href="#">27603</a>     | Expressed sequence C78557          | <a href="#">C78557</a>             | 1.008 | 0.508  | 0.70052  | 0.70224  |
| 8250 | 10346224 | <a href="#">ENSMUST00000087708</a> | <a href="#">227094</a>    | RIKEN cDNA 5330401P04 gene         | <a href="#">5330401P04Rik</a>      | 1.008 | 0.132  | 0.898418 | 0.960023 |
| 8251 | 10585759 | <a href="#">NM_153799</a>          | <a href="#">353190</a>    | enhancer of mRNA decapping 3<br>h  | <a href="#">Edc3</a>               | 1.008 | -0.106 | 0.918261 | 0.967805 |
| 8252 | 10378024 | <a href="#">NM_025993</a>          | <a href="#">67139</a>     | MIS12 homolog (yeast)              | <a href="#">Mis12</a>              | 1.008 | -0.463 | 0.656942 | 0.846475 |
| 8253 | 10465263 | <a href="#">NM_011262</a>          | <a href="#">19708</a>     | D4, zinc and double PHD finger     | <a href="#">Dpf2</a>               | 1.008 | -0.183 | 0.859565 | 0.943578 |
| 8254 | 10419049 | <a href="#">NM_008734</a>          | <a href="#">18183</a>     | neuregulin 3                       | <a href="#">Nrg3</a>               | 1.008 | 0.11   | 0.91531  | 0.966602 |
| 8255 | 10423172 | <a href="#">NM_025673</a>          | <a href="#">66629</a>     | golgi phosphoprotein 3             | <a href="#">Golp3</a>              | 1.008 | -0.184 | 0.858929 | 0.943374 |
| 8256 | 10399549 | <a href="#">XM_126830</a>          | <a href="#">73667</a>     | RIKEN cDNA 2410004P03 gene         | <a href="#">2410004P03Rik</a>      | 1.008 | 1.09   | 0.310712 | 0.587208 |
| 8257 | 10412258 |                                    |                           |                                    |                                    | 1.008 | -0.571 | 0.58553  | 0.80308  |
| 8258 | 10443940 | <a href="#">BC094586</a>           | <a href="#">77652</a>     | zinc finger protein 422, relat     | <a href="#">Zfp422-rs1</a>         | 1.008 | 0.078  | 0.940125 | 0.9767   |
| 8259 | 10605790 | <a href="#">XM_141955</a>          | <a href="#">236914</a>    | gene model 371, (NCBI)             | <a href="#">Gm371</a>              | 1.008 | 0.378  | 0.71629  | 0.875701 |
| 8260 | 10418989 |                                    |                           |                                    |                                    | 1.008 | 0.658  | 0.531017 | 0.765411 |
| 8261 | 10397818 | <a href="#">NM_016856</a>          | <a href="#">51786</a>     | cleavage and polyadenylation s     | <a href="#">Cpsf2</a>              | 1.008 | -0.304 | 0.769912 | 0.904792 |
| 8262 | 10566140 | <a href="#">BC106830</a>           | <a href="#">257926</a>    | olfactory receptor 544             | <a href="#">Olfr544</a>            | 1.008 | 0.149  | 0.885776 | 0.955239 |
| 8263 | 10522786 |                                    |                           |                                    |                                    | 1.008 | 0.521  | 0.617841 | 0.823459 |
| 8264 | 10417561 | <a href="#">NM_183187</a>          | <a href="#">268709</a>    | cDNA sequence BC055107             | <a href="#">BC055107</a>           | 1.008 | 0.149  | 0.885672 | 0.95523  |
| 8265 | 10455572 | <a href="#">NM_001033446</a>       | <a href="#">381142</a>    | gene model 949, (NCBI)             | <a href="#">Gm949</a>              | 1.008 | 0.151  | 0.883846 | 0.954252 |
| 8266 | 10569583 | <a href="#">ENSMUST00000093967</a> | <a href="#">233977</a>    | protein tyrosine phosphatase,      | <a href="#">Ppfia1</a>             | 1.008 | -0.322 | 0.756486 | 0.897871 |
| 8267 | 10498446 | <a href="#">BC119599</a>           | <a href="#">229357</a>    | G protein-coupled receptor 149     | <a href="#">Gpr149</a>             | 1.008 | -0.26  | 0.802391 | 0.919965 |
| 8268 | 10350992 | <a href="#">NM_001024952</a>       | <a href="#">381305</a>    | RING CCCH (C3H) domains 1          | <a href="#">Re3h1</a>              | 1.008 | -0.142 | 0.890943 | 0.957416 |
| 8269 | 10444431 | <a href="#">NM_030890</a>          | <a href="#">260297</a>    | proline-rich transmembrane pro     | <a href="#">Prtl</a>               | 1.008 | -0.05  | 0.961679 | 0.985234 |
| 8270 | 10470318 |                                    |                           |                                    |                                    | 1.008 | 0.088  | 0.93256  | 0.973153 |
| 8271 | 10444685 | <a href="#">NM_178592</a>          | <a href="#">193742</a>    | HLA-B associated transcript 5      | <a href="#">Bat5</a>               | 1.008 | 0.146  | 0.887917 | 0.955819 |
| 8272 | 10408555 |                                    |                           |                                    |                                    | 1.008 | -0.243 | 0.814659 | 0.925586 |
| 8273 | 10366517 | <a href="#">AK016591</a>           | <a href="#">71013</a>     | RIKEN cDNA 4933400F03 gene         | <a href="#">4933400F03Rik</a>      | 1.007 | 0.24   | 0.816756 | 0.926972 |
| 8274 | 10515164 | <a href="#">NM_025647</a>          | <a href="#">66588</a>     | cytidine monophosphate (UMP-<br>CM | <a href="#">Cmpk1</a>              | 1.007 | -0.362 | 0.727404 | 0.881863 |
| 8275 | 10597098 | <a href="#">NM_009921</a>          | <a href="#">12796</a>     | cathelicidin antimicrobial pep     | <a href="#">Camp</a>               | 1.007 | 0.168  | 0.870979 | 0.948568 |
| 8276 | 10606789 | <a href="#">NM_025355</a>          | <a href="#">66104</a>     | transcription elongation facto     | <a href="#">Tceal6</a>             | 1.007 | -0.215 | 0.835647 | 0.933431 |
| 8277 | 10377695 | <a href="#">NM_030064</a>          | <a href="#">78246</a>     | PHD finger protein 23              | <a href="#">Phf23</a>              | 1.007 | -0.518 | 0.619956 | 0.825151 |
| 8278 | 10532828 | <a href="#">NM_029956</a>          | <a href="#">77697</a>     | methylmalonic aciduria (cobala     | <a href="#">Mmab</a>               | 1.007 | 0.167  | 0.872293 | 0.948998 |
| 8279 | 10374908 | <a href="#">NM_194054</a>          | <a href="#">68585</a>     | reticulon 4                        | <a href="#">Rtn4</a>               | 1.007 | 0.09   | 0.930954 | 0.972759 |
| 8280 | 10425109 | <a href="#">ENSMUST00000018150</a> | <a href="#">78623</a>     | RIKEN cDNA 1700041B01<br>gene      | <a href="#">1700041B01Rik</a>      | 1.007 | 0.361  | 0.728588 | 0.882433 |
| 8281 | 10361767 | <a href="#">NM_175102</a>          | <a href="#">66125</a>     | splicing factor 3b, subunit 5      | <a href="#">SF3b5</a>              | 1.007 | -0.352 | 0.73504  | 0.886784 |
| 8282 | 10469070 | <a href="#">NM_016918</a>          | <a href="#">53893</a>     | nudix (nucleoside diphosphate      | <a href="#">Nudt5</a>              | 1.007 | -0.099 | 0.923625 | 0.969694 |
| 8283 | 10410919 | <a href="#">XR_034009</a>          | <a href="#">435373</a>    | similar to high mobility group     | <a href="#">LOC435373</a>          | 1.007 | 0.063  | 0.951413 | 0.981144 |
| 8284 | 10552843 |                                    |                           |                                    |                                    | 1.007 | 0.483  | 0.643485 | 0.838573 |
| 8285 | 10473107 |                                    |                           |                                    |                                    | 1.007 | 0.083  | 0.935726 | 0.974582 |
| 8286 | 10562059 | <a href="#">NM_025628</a>          | <a href="#">110323</a>    | cytochrome c oxidase, subunit      | <a href="#">Cox6b1</a>             | 1.007 | -0.268 | 0.796425 | 0.917464 |
| 8287 | 10370422 | <a href="#">NM_029546</a>          | <a href="#">110816</a>    | PWP2 periodic tryptophan prote     | <a href="#">Pwp2</a>               | 1.007 | -0.159 | 0.877992 | 0.951715 |
| 8288 | 10466528 | <a href="#">AK041805</a>           | <a href="#">100036532</a> | predicted gene,<br>ENSMUSG0000005  | <a href="#">ENSMUSG00000055458</a> | 1.007 | 0.224  | 0.828763 | 0.931153 |
| 8289 | 10363210 | <a href="#">NM_008863</a>          | <a href="#">18768</a>     | protein kinase inhibitor beta,     | <a href="#">Pkib</a>               | 1.007 | 0.29   | 0.780059 | 0.910713 |
| 8290 | 10555233 |                                    |                           |                                    |                                    | 1.007 | -0.323 | 0.755743 | 0.89752  |
| 8291 | 10592114 | <a href="#">NM_172291</a>          | <a href="#">235169</a>    | FAD-dependent oxidoreductase<br>d  | <a href="#">Foxred1</a>            | 1.007 | -0.072 | 0.944302 | 0.977948 |
| 8292 | 10386996 | <a href="#">NM_145136</a>          | <a href="#">214384</a>    | myocardin                          | <a href="#">Myocd</a>              | 1.007 | -0.016 | 0.988001 | 0.995045 |
| 8293 | 10428755 | <a href="#">NM_009572</a>          | <a href="#">22770</a>     | zinc fingers and homeoboxes 1      | <a href="#">Zhx1</a>               | 1.007 | -0.158 | 0.878493 | 0.95179  |
| 8294 | 10555401 |                                    |                           |                                    |                                    | 1.007 | 0.173  | 0.86732  | 0.946934 |
| 8295 | 10571530 | <a href="#">NM_001081286</a>       | <a href="#">14107</a>     | FAT tumor suppressor homolog<br>1  | <a href="#">Fat1</a>               | 1.007 | -0.558 | 0.593657 | 0.808175 |
| 8296 | 10351482 | <a href="#">BC099563</a>           | <a href="#">76925</a>     | RIKEN cDNA 1700015E13 gene         | <a href="#">1700015E13Rik</a>      | 1.007 | 0.087  | 0.933374 | 0.973406 |
| 8297 | 10465446 | <a href="#">NM_001081291</a>       | <a href="#">78317</a>     | coiled-coil domain containing      | <a href="#">Ccdc88b</a>            | 1.007 | 0.139  | 0.893135 | 0.957774 |
| 8298 | 10365116 | <a href="#">NM_133964</a>          | <a href="#">102115</a>    | deoxyhypusine<br>hydroxylase/mono  | <a href="#">Dohh</a>               | 1.007 | 0.232  | 0.823217 | 0.929358 |
| 8299 | 10420372 | <a href="#">NM_030004</a>          | <a href="#">68631</a>     | crystallin, lambda 1               | <a href="#">Cry11</a>              | 1.007 | 0.4    | 0.700977 | 0.868962 |
| 8300 | 10356677 | <a href="#">ENSMUST00000097642</a> | <a href="#">66915</a>     | myeloma overexpressed 2            | <a href="#">Myeov2</a>             | 1.007 | -0.238 | 0.818169 | 0.927633 |

|      |          |                                    |                           |                                |                               |       |        |          |          |
|------|----------|------------------------------------|---------------------------|--------------------------------|-------------------------------|-------|--------|----------|----------|
| 8301 | 10481210 | <a href="#">NM_009500</a>          | <a href="#">22325</a>     | vav 2 oncogene                 | <a href="#">Vav2</a>          | 1.007 | -0.125 | 0.903562 | 0.962464 |
| 8302 | 10392142 | <a href="#">NM_008339</a>          | <a href="#">15985</a>     | CD79B antigen                  | <a href="#">Cd79b</a>         | 1.007 | 0.449  | 0.666902 | 0.851389 |
| 8303 | 10440550 | <a href="#">NM_001081068</a>       | <a href="#">78913</a>     | zinc finger protein 294        | <a href="#">Zfp294</a>        | 1.007 | -0.654 | 0.533636 | 0.767668 |
| 8304 | 10481654 | <a href="#">NM_010236</a>          | <a href="#">14287</a>     | folylpolyglutamyl synthetase   | <a href="#">Fpgs</a>          | 1.007 | 0.218  | 0.833145 | 0.932804 |
| 8305 | 10362581 | <a href="#">NM_028006</a>          | <a href="#">71924</a>     | epsilon-tubulin 1              | <a href="#">Tubel1</a>        | 1.007 | 0.336  | 0.74628  | 0.892295 |
| 8306 | 10446553 | <a href="#">NM_013813</a>          | <a href="#">13823</a>     | erythrocyte protein band 4.1-l | <a href="#">Epb4.1l3</a>      | 1.007 | -0.435 | 0.676132 | 0.855911 |
| 8307 | 10470200 | <a href="#">NM_001100455</a>       | <a href="#">227630</a>    | lipocalin 11                   | <a href="#">Lcn11</a>         | 1.007 | 0.227  | 0.826809 | 0.93054  |
| 8308 | 10484648 | <a href="#">NM_146767</a>          | <a href="#">258763</a>    | olfactory receptor 1104        | <a href="#">Olfr1104</a>      | 1.007 | 0.23   | 0.824499 | 0.929523 |
| 8309 | 10518113 | <a href="#">NM_144531</a>          | <a href="#">71529</a>     | RIKEN cDNA 9030409G11 gene     | <a href="#">9030409G11Rik</a> | 1.007 | -0.211 | 0.838623 | 0.934583 |
| 8310 | 10478487 | <a href="#">NM_025575</a>          | <a href="#">66460</a>     | SYS1 Golgi-localized integral  | <a href="#">Sys1</a>          | 1.007 | 0.075  | 0.942563 | 0.977825 |
| 8311 | 10365384 | <a href="#">NM_001024918</a>       | <a href="#">71137</a>     | regulatory factor X, 4 (influe | <a href="#">Rfx4</a>          | 1.007 | 0.642  | 0.540796 | 0.773267 |
| 8312 | 10415156 | <a href="#">ENSMUST00000085837</a> | <a href="#">545052</a>    | predicted gene, EG545052       | <a href="#">EG545052</a>      | 1.007 | -0.103 | 0.920614 | 0.968204 |
| 8313 | 10554710 |                                    |                           |                                |                               | 1.007 | -0.174 | 0.866782 | 0.946802 |
| 8314 | 10594460 | <a href="#">NM_001001295</a>       | <a href="#">213550</a>    | DIS3 mitotic control homolog ( | <a href="#">Dis3l1</a>        | 1.007 | -0.039 | 0.969586 | 0.987616 |
| 8315 | 10573295 | <a href="#">NM_009055</a>          | <a href="#">19724</a>     | regulatory factor X, 1 (influe | <a href="#">Rfx1</a>          | 1.007 | 0.14   | 0.892347 | 0.957747 |
| 8316 | 10377569 | <a href="#">NM_011814</a>          | <a href="#">23879</a>     | fragile X mental retardation,  | <a href="#">Fxr2</a>          | 1.007 | -0.262 | 0.800303 | 0.919317 |
| 8317 | 10456764 | <a href="#">NM_010754</a>          | <a href="#">17126</a>     | MAD homolog 2 (Drosophila)     | <a href="#">Smad2</a>         | 1.007 | -0.209 | 0.840132 | 0.935328 |
| 8318 | 10403964 | <a href="#">NM_183014</a>          | <a href="#">193452</a>    | zinc finger protein 184 (Krupp | <a href="#">Zfp184</a>        | 1.007 | -0.487 | 0.640922 | 0.837375 |
| 8319 | 10508001 | <a href="#">NM_177573</a>          | <a href="#">194268</a>    | RIKEN cDNA 9930104L06 gene     | <a href="#">9930104L06Rik</a> | 1.007 | 0.286  | 0.782593 | 0.911672 |
| 8320 | 10474836 | <a href="#">NM_019826</a>          | <a href="#">56357</a>     | isovaleryl coenzyme A dehydrog | <a href="#">Ivd</a>           | 1.007 | 0.103  | 0.921083 | 0.968443 |
| 8321 | 10533007 | <a href="#">NM_001080808</a>       | <a href="#">75665</a>     | coiled-coil domain containing  | <a href="#">Ccdc64</a>        | 1.007 | 0.003  | 0.997621 | 0.999133 |
| 8322 | 10451918 | <a href="#">NM_024432</a>          | <a href="#">66530</a>     | UBX domain containing 1        | <a href="#">Ubxdl1</a>        | 1.007 | -0.11  | 0.915238 | 0.966602 |
| 8323 | 10495012 | <a href="#">NM_013629</a>          | <a href="#">18685</a>     | putative homeodomain transcrip | <a href="#">Phtf1</a>         | 1.007 | -0.141 | 0.892014 | 0.95769  |
| 8324 | 10501313 | <a href="#">XR_032348</a>          | <a href="#">668686</a>    | similar to Siva1 protein       | <a href="#">LOC668686</a>     | 1.007 | -0.208 | 0.840971 | 0.935759 |
| 8325 | 10562665 |                                    |                           |                                |                               | 1.007 | 0.192  | 0.853259 | 0.940713 |
| 8326 | 10404339 | <a href="#">ENSMUST00000095920</a> | <a href="#">100041036</a> | novel protein similar to dynei | <a href="#">RP23-374O23.1</a> | 1.007 | 0.588  | 0.574332 | 0.797076 |
| 8327 | 10481401 | <a href="#">NM_178694</a>          | <a href="#">227693</a>    | zer-1 homolog (C. elegans)     | <a href="#">Zer1</a>          | 1.007 | 0.071  | 0.945656 | 0.978514 |
| 8328 | 10606770 | <a href="#">NM_175446</a>          | <a href="#">215693</a>    | zinc finger, matrin type 1     | <a href="#">Zmat1</a>         | 1.007 | -0.285 | 0.783879 | 0.912068 |
| 8329 | 10457400 |                                    |                           |                                |                               | 1.007 | 0.255  | 0.805671 | 0.921565 |
| 8330 | 10345930 | <a href="#">NM_009418</a>          | <a href="#">22019</a>     | tripeptidyl peptidase II       | <a href="#">Tpp2</a>          | 1.007 | -0.122 | 0.9066   | 0.963405 |
| 8331 | 10552143 | <a href="#">NM_017394</a>          | <a href="#">53896</a>     | solute carrier family 7 (catio | <a href="#">Slc7a10</a>       | 1.007 | 0.248  | 0.810967 | 0.923749 |
| 8332 | 10542686 | <a href="#">ENSMUST00000100817</a> | <a href="#">52285</a>     | DNA segment, Chr 6, ERATO Doi  | <a href="#">D6Erd474e</a>     | 1.007 | 0.261  | 0.801036 | 0.919467 |
| 8333 | 10607116 | <a href="#">NM_019496</a>          | <a href="#">56068</a>     | Alport syndrome, mental retard | <a href="#">Ammecr1</a>       | 1.007 | -0.218 | 0.83378  | 0.932972 |
| 8334 | 10385591 | <a href="#">NM_175334</a>          | <a href="#">103806</a>    | mastermind like 1 (Drosophila) | <a href="#">Maml1</a>         | 1.007 | 0.231  | 0.823862 | 0.929508 |
| 8335 | 10417895 | <a href="#">NM_008914</a>          | <a href="#">19056</a>     | protein phosphatase 3, catalyt | <a href="#">Ppp3cb</a>        | 1.007 | -0.209 | 0.840589 | 0.93555  |
| 8336 | 10415700 | <a href="#">NM_144843</a>          | <a href="#">219135</a>    | myotubularin related protein 6 | <a href="#">Mtmr6</a>         | 1.007 | 0.106  | 0.918783 | 0.967805 |
| 8337 | 10375038 | <a href="#">NM_010822</a>          | <a href="#">268395</a>    | N-methylpurine-DNA glycosylase | <a href="#">Mpg</a>           | 1.007 | -0.243 | 0.814893 | 0.925752 |
| 8338 | 10447897 | <a href="#">NM_001113533</a>       | <a href="#">60532</a>     | Wilms' tumour 1-associating pr | <a href="#">Wtap</a>          | 1.007 | -0.001 | 0.999197 | 0.999589 |
| 8339 | 10582310 | <a href="#">NM_138656</a>          | <a href="#">192156</a>    | mevalonate (diphospho) decarbo | <a href="#">Mvd</a>           | 1.007 | 0.002  | 0.998179 | 0.99936  |
| 8340 | 10590245 | <a href="#">NM_144793</a>          | <a href="#">208638</a>    | solute carrier family 25, memb | <a href="#">Slc25a38</a>      | 1.006 | 0.081  | 0.937293 | 0.975526 |
| 8341 | 10514296 | <a href="#">NM_010507</a>          | <a href="#">15972</a>     | interferon alpha 9             | <a href="#">Ifna9</a>         | 1.006 | 0.394  | 0.704746 | 0.871013 |
| 8342 | 10370330 | <a href="#">ENSMUST00000092369</a> | <a href="#">544710</a>    | predicted gene, EG544710       | <a href="#">EG544710</a>      | 1.006 | -0.238 | 0.818133 | 0.927633 |
| 8343 | 10470158 | <a href="#">NM_177840</a>          | <a href="#">620709</a>    | lipocalin 6                    | <a href="#">Lcn6</a>          | 1.006 | 0.105  | 0.919465 | 0.967948 |
| 8344 | 10461365 | <a href="#">NM_026007</a>          | <a href="#">67160</a>     | eukaryotic translation elongat | <a href="#">Eef1g</a>         | 1.006 | -0.326 | 0.753779 | 0.896244 |
| 8345 | 10402608 | <a href="#">BC048462</a>           | <a href="#">66323</a>     | RIKEN cDNA 1700001K19 gene     | <a href="#">1700001K19Rik</a> | 1.006 | -0.623 | 0.552301 | 0.782016 |
| 8346 | 10571111 | <a href="#">NM_001101502</a>       | <a href="#">353310</a>    | zinc finger protein 703        | <a href="#">Zfp703</a>        | 1.006 | 0.39   | 0.707984 | 0.872288 |
| 8347 | 10360235 | <a href="#">NM_009813</a>          | <a href="#">12372</a>     | calsequestrin 1                | <a href="#">Casq1</a>         | 1.006 | 0.629  | 0.548801 | 0.779201 |
| 8348 | 10469712 | <a href="#">NM_019501</a>          | <a href="#">56075</a>     | prenyl (solanesyl) diphosphate | <a href="#">Pdss1</a>         | 1.006 | 0.031  | 0.97636  | 0.990137 |
| 8349 | 10394931 |                                    |                           |                                |                               | 1.006 | 0.386  | 0.710422 | 0.873031 |
| 8350 | 10574013 | <a href="#">NM_008631</a>          | <a href="#">17752</a>     | metallothionein 4              | <a href="#">Mt4</a>           | 1.006 | 0.188  | 0.856359 | 0.941981 |
| 8351 | 10518050 | <a href="#">NM_007919</a>          | <a href="#">13706</a>     | elastase 2A                    | <a href="#">RP23-395H4.4</a>  | 1.006 | 0.024  | 0.981629 | 0.992092 |
| 8352 | 10578066 |                                    |                           |                                |                               | 1.006 | 0.251  | 0.809043 | 0.923112 |
| 8353 | 10546929 | <a href="#">NM_178373</a>          | <a href="#">14311</a>     | cell death-inducing DFFA-like  | <a href="#">Cidec</a>         | 1.006 | 0.105  | 0.919503 | 0.967948 |
| 8354 | 10516994 | <a href="#">BC008163</a>           | <a href="#">230789</a>    | cDNA sequence BC008163         | <a href="#">BC008163</a>      | 1.006 | -0.338 | 0.745121 | 0.891615 |

|      |          |                                    |                           |                                    |                                    |       |        |          |          |
|------|----------|------------------------------------|---------------------------|------------------------------------|------------------------------------|-------|--------|----------|----------|
| 8355 | 10524965 |                                    |                           |                                    |                                    | 1.006 | 0.09   | 0.930693 | 0.972759 |
| 8356 | 10392410 | <a href="#">ENSMUST00000100300</a> | <a href="#">100038581</a> | predicted gene,<br>ENSMUSG0000007  | <a href="#">ENSMUSG00000075466</a> | 1.006 | 0.473  | 0.650342 | 0.84316  |
| 8357 | 10372230 | <a href="#">NM_008657</a>          | <a href="#">17878</a>     | myogenic factor 6                  | <a href="#">Myf6</a>               | 1.006 | 0.398  | 0.7021   | 0.869258 |
| 8358 | 10437270 | <a href="#">AK018837</a>           | <a href="#">78377</a>     | RIKEN cDNA 1700016D08<br>gene      | <a href="#">1700016D08Rik</a>      | 1.006 | 0.215  | 0.835384 | 0.933323 |
| 8359 | 10595183 | <a href="#">NM_010106</a>          | <a href="#">13627</a>     | eukaryotic translation elongat     | <a href="#">Eef1a1</a>             | 1.006 | -0.015 | 0.988814 | 0.995308 |
| 8360 | 10574330 | <a href="#">NM_199455</a>          | <a href="#">73407</a>     | RIKEN cDNA 1700055M20<br>gene      | <a href="#">1700055M20Rik</a>      | 1.006 | -0.066 | 0.948989 | 0.980236 |
| 8361 | 10448559 |                                    |                           |                                    |                                    | 1.006 | 0.209  | 0.840058 | 0.935328 |
| 8362 | 10587049 |                                    |                           |                                    |                                    | 1.006 | 0.6    | 0.566851 | 0.792482 |
| 8363 | 10540148 | <a href="#">NM_198668</a>          | <a href="#">381798</a>    | RIKEN cDNA 4930590J08 gene         | <a href="#">4930590J08Rik</a>      | 1.006 | 0.259  | 0.802611 | 0.919965 |
| 8364 | 10487380 | <a href="#">ENSMUST00000099407</a> | <a href="#">545459</a>    | predicted gene,<br>ENSMUSG0000007  | <a href="#">ENSMUSG00000074822</a> | 1.006 | -0.226 | 0.827463 | 0.930659 |
| 8365 | 10529797 |                                    |                           |                                    |                                    | 1.006 | -0.146 | 0.887558 | 0.955671 |
| 8366 | 10533026 | <a href="#">NM_031869</a>          | <a href="#">19079</a>     | protein kinase, AMP-activated,     | <a href="#">Prkab1</a>             | 1.006 | -0.431 | 0.679316 | 0.857678 |
| 8367 | 10346544 | <a href="#">NM_025597</a>          | <a href="#">66495</a>     | NADH dehydrogenase<br>(ubiquinone) | <a href="#">Ndufb3</a>             | 1.006 | -0.074 | 0.943261 | 0.977948 |
| 8368 | 10506591 | <a href="#">NM_172272</a>          | <a href="#">230577</a>    | prolyl-tRNA synthetase (mitoch     | <a href="#">Pars2</a>              | 1.006 | -0.194 | 0.851832 | 0.940193 |
| 8369 | 10415353 | <a href="#">NM_027673</a>          | <a href="#">71099</a>     | testis-specific serine kinase      | <a href="#">Tskk4</a>              | 1.006 | 0.299  | 0.773567 | 0.9067   |
| 8370 | 10471080 | <a href="#">NM_028846</a>          | <a href="#">74270</a>     | ubiquitin specific peptidase 2     | <a href="#">Usp20</a>              | 1.006 | 0.138  | 0.894147 | 0.958326 |
| 8371 | 10452903 | <a href="#">XM_001481192</a>       | <a href="#">100043886</a> | L antigen family, member 3 pse     | <a href="#">LOC100043886</a>       | 1.006 | -0.094 | 0.928039 | 0.971746 |
| 8372 | 10389973 | <a href="#">NM_144827</a>          | <a href="#">217116</a>    | spermatogenesis associated 20      | <a href="#">Spata20</a>            | 1.006 | 0.77   | 0.465848 | 0.719391 |
| 8373 | 10526842 | <a href="#">NM_028130</a>          | <a href="#">72154</a>     | zinc finger protein 157            | <a href="#">Zfp157</a>             | 1.006 | -0.233 | 0.821902 | 0.92863  |
| 8374 | 10591418 | <a href="#">NM_001103168</a>       | <a href="#">100009600</a> | GATA-like 1                        | <a href="#">Glp1</a>               | 1.006 | 0.319  | 0.758774 | 0.898998 |
| 8375 | 10506397 | <a href="#">NM_027696</a>          | <a href="#">71148</a>     | mesoderm induction early respo     | <a href="#">Mier1</a>              | 1.006 | -0.318 | 0.759668 | 0.899311 |
| 8376 | 10480652 | <a href="#">NM_001082476</a>       | <a href="#">78797</a>     | NADPH dependent diflavin<br>oxido  | <a href="#">Ndor1</a>              | 1.006 | -0.419 | 0.68732  | 0.862149 |
| 8377 | 10596166 | <a href="#">BC021390</a>           | <a href="#">71775</a>     | RIKEN cDNA 1300017J02 gene         | <a href="#">1300017J02Rik</a>      | 1.006 | -0.098 | 0.924812 | 0.970324 |
| 8378 | 10581214 | <a href="#">NM_177449</a>          | <a href="#">234684</a>    | leucine rich repeat containing     | <a href="#">Lrrc29</a>             | 1.006 | 0.201  | 0.846612 | 0.937778 |
| 8379 | 10462473 | <a href="#">NM_010776</a>          | <a href="#">17195</a>     | mannose binding lectin (C)         | <a href="#">Mbl2</a>               | 1.006 | 0.051  | 0.960799 | 0.985069 |
| 8380 | 10373902 | <a href="#">BC039988</a>           | <a href="#">71962</a>     | RIKEN cDNA 2410008K03<br>gene      | <a href="#">2410008K03Rik</a>      | 1.006 | -0.138 | 0.894371 | 0.958345 |
| 8381 | 10578425 | <a href="#">ENSMUST00000084536</a> | <a href="#">434310</a>    | cDNA sequence AY512931             | <a href="#">AY512931</a>           | 1.006 | 0.466  | 0.655084 | 0.845541 |
| 8382 | 10511843 | <a href="#">NM_026194</a>          | <a href="#">67490</a>     | RIKEN cDNA 1810074P20 gene         | <a href="#">1810074P20Rik</a>      | 1.006 | -0.064 | 0.950917 | 0.981077 |
| 8383 | 10556576 | <a href="#">NM_019772</a>          | <a href="#">56372</a>     | RIKEN cDNA 1110004F10 gene         | <a href="#">1110004F10Rik</a>      | 1.006 | -0.554 | 0.59603  | 0.80968  |
| 8384 | 10575120 | <a href="#">NM_009229</a>          | <a href="#">20650</a>     | syntrophin, basic 2                | <a href="#">Sntb2</a>              | 1.006 | 0.143  | 0.889877 | 0.956717 |
| 8385 | 10557816 | <a href="#">NM_009739</a>          | <a href="#">12041</a>     | branched chain ketoacid dehydr     | <a href="#">Bckdk</a>              | 1.006 | -0.371 | 0.721031 | 0.878601 |
| 8386 | 10472422 | <a href="#">NM_001033477</a>       | <a href="#">383709</a>    | gene model 1322, (NCBI)            | <a href="#">Gm1322</a>             | 1.006 | -0.087 | 0.932866 | 0.973233 |
| 8387 | 10487508 |                                    |                           |                                    |                                    | 1.006 | -0.062 | 0.952098 | 0.981385 |
| 8388 | 10566286 |                                    |                           |                                    |                                    | 1.006 | 0.628  | 0.549673 | 0.779911 |
| 8389 | 10430431 | <a href="#">ENSMUST00000100469</a> | <a href="#">100038696</a> | predicted gene,<br>ENSMUSG0000007  | <a href="#">ENSMUSG00000075561</a> | 1.006 | 0.628  | 0.549172 | 0.779541 |
| 8390 | 10349821 | <a href="#">NM_029025</a>          | <a href="#">74626</a>     | transmembrane protein 81           | <a href="#">Tmem81</a>             | 1.006 | 0.087  | 0.9334   | 0.973406 |
| 8391 | 10503845 | <a href="#">NM_019586</a>          | <a href="#">56228</a>     | ubiquitin-conjugating enzyme E     | <a href="#">Ube2j1</a>             | 1.006 | -0.75  | 0.477117 | 0.727862 |
| 8392 | 10521383 | <a href="#">NM_007418</a>          | <a href="#">11553</a>     | adrenergic receptor, alpha 2c      | <a href="#">Adra2c</a>             | 1.006 | 0.203  | 0.844778 | 0.936998 |
| 8393 | 10382152 | <a href="#">NM_198298</a>          | <a href="#">78455</a>     | helicase with zinc finger doma     | <a href="#">Helz</a>               | 1.006 | -0.181 | 0.861542 | 0.944347 |
| 8394 | 10534142 | <a href="#">NM_023248</a>          | <a href="#">66711</a>     | Shwachman-Bodian-Diamond<br>syndr  | <a href="#">Sbds</a>               | 1.006 | 0.065  | 0.950035 | 0.980663 |
| 8395 | 10442827 |                                    |                           |                                    |                                    | 1.006 | 0.135  | 0.896549 | 0.959489 |
| 8396 | 10593842 | <a href="#">NM_019793</a>          | <a href="#">56434</a>     | tetraspanin 3                      | <a href="#">Tspan3</a>             | 1.006 | -0.425 | 0.683423 | 0.859874 |
| 8397 | 10539850 | <a href="#">BC024401</a>           | <a href="#">232210</a>    | RIKEN cDNA 8430410A17<br>gene      | <a href="#">8430410A17Rik</a>      | 1.006 | 0.051  | 0.960752 | 0.985069 |
| 8398 | 10391286 | <a href="#">NM_001113563</a>       | <a href="#">20851</a>     | signal transducer and activato     | <a href="#">Stat5b</a>             | 1.006 | -0.285 | 0.78395  | 0.912068 |
| 8399 | 10606195 | <a href="#">NM_011276</a>          | <a href="#">19820</a>     | ring finger protein 12             | <a href="#">Rnf12</a>              | 1.006 | -0.113 | 0.913463 | 0.965665 |
| 8400 | 10591357 | <a href="#">NM_016876</a>          | <a href="#">53356</a>     | eukaryotic translation initiat     | <a href="#">Eif3g</a>              | 1.006 | -0.477 | 0.647445 | 0.841245 |
| 8401 | 10588752 | <a href="#">BC115773</a>           | <a href="#">67722</a>     | RIKEN cDNA 4921517D21<br>gene      | <a href="#">4921517D21Rik</a>      | 1.006 | 0.463  | 0.657274 | 0.846702 |

|      |          |                                    |                           |                                 |                                    |       |        |          |          |
|------|----------|------------------------------------|---------------------------|---------------------------------|------------------------------------|-------|--------|----------|----------|
| 8402 | 10434645 | <a href="#">NM_029457</a>          | <a href="#">75826</a>     | SUMO/sentrin specific peptidas  | <a href="#">Semp2</a>              | 1.006 | 0.101  | 0.922623 | 0.969146 |
| 8403 | 10563608 |                                    |                           |                                 |                                    | 1.006 | -0.17  | 0.869341 | 0.947675 |
| 8404 | 10390430 | <a href="#">NM_018873</a>          | <a href="#">56013</a>     | P140 gene                       | <a href="#">RP23-157O10.7</a>      | 1.006 | 0.151  | 0.883866 | 0.954252 |
| 8405 | 10535979 | <a href="#">NM_027009</a>          | <a href="#">69263</a>     | replication factor C (activo    | <a href="#">Rfc3</a>               | 1.006 | -0.358 | 0.730649 | 0.883548 |
| 8406 | 10534679 | <a href="#">NM_201373</a>          | <a href="#">384309</a>    | tripartite motif-containing 56  | <a href="#">Trim56</a>             | 1.006 | 0.074  | 0.943002 | 0.977825 |
| 8407 | 10597554 | <a href="#">BC104378</a>           | <a href="#">74638</a>     | zinc finger, CW type with PWWP  | <a href="#">Zcwpw2</a>             | 1.006 | 0.39   | 0.708054 | 0.872288 |
| 8408 | 10470973 | <a href="#">NM_198304</a>          | <a href="#">227699</a>    | nucleoporin 188                 | <a href="#">Nup188</a>             | 1.005 | -0.173 | 0.867465 | 0.946957 |
| 8409 | 10553256 | <a href="#">NM_010866</a>          | <a href="#">17927</a>     | myogenic differentiation 1      | <a href="#">Myod1</a>              | 1.005 | 0.68   | 0.517894 | 0.756834 |
| 8410 | 10403984 | <a href="#">NM_001080972</a>       | <a href="#">626299</a>    | predicted gene, OTTMUSG00000000 | <a href="#">OTTMUSG00000000480</a> | 1.005 | 0.538  | 0.607032 | 0.817118 |
| 8411 | 10393431 | <a href="#">NM_009387</a>          | <a href="#">21877</a>     | thymidine kinase 1              | <a href="#">Tk1</a>                | 1.005 | 0.128  | 0.901929 | 0.961403 |
| 8412 | 10577240 | <a href="#">NM_053171</a>          | <a href="#">94109</a>     | CUB and Sushi multiple domains  | <a href="#">Csm1</a>               | 1.005 | 0.11   | 0.915298 | 0.966602 |
| 8413 | 10534202 | <a href="#">NM_010876</a>          | <a href="#">17969</a>     | neutrophil cytosolic factor 1   | <a href="#">Ncf1</a>               | 1.005 | 0.363  | 0.726993 | 0.881688 |
| 8414 | 10422238 | <a href="#">XM_001003482</a>       | <a href="#">668761</a>    | predicted gene, EG668761        | <a href="#">EG668761</a>           | 1.005 | -0.074 | 0.943333 | 0.977948 |
| 8415 | 10460061 | <a href="#">ENSMUST00000049917</a> | <a href="#">240476</a>    | zinc finger protein 407         | <a href="#">Zfp407</a>             | 1.005 | -0.219 | 0.832712 | 0.932699 |
| 8416 | 10576586 | <a href="#">NM_175434</a>          | <a href="#">210027</a>    | solute carrier family 35, memb  | <a href="#">Slc35f3</a>            | 1.005 | 0.195  | 0.850497 | 0.939883 |
| 8417 | 10418004 | <a href="#">NM_018829</a>          | <a href="#">55946</a>     | adaptor-related protein comple  | <a href="#">Ap3m1</a>              | 1.005 | -0.192 | 0.852706 | 0.940561 |
| 8418 | 10542656 | <a href="#">ENSMUST00000088263</a> | <a href="#">319552</a>    | RIKEN cDNA B230216G23 gene      | <a href="#">B230216G23Rik</a>      | 1.005 | 0.617  | 0.556264 | 0.784737 |
| 8419 | 10552857 | <a href="#">NM_182993</a>          | <a href="#">72961</a>     | solute carrier family 17 (sodi  | <a href="#">Slc17a7</a>            | 1.005 | 0.131  | 0.899115 | 0.960129 |
| 8420 | 10579500 | <a href="#">NM_022419</a>          | <a href="#">64296</a>     | abhydrolase domain containing   | <a href="#">Abhd8</a>              | 1.005 | -0.387 | 0.709679 | 0.872992 |
| 8421 | 10539008 | <a href="#">NM_025783</a>          | <a href="#">66700</a>     | vacuolar protein sorting 24 (y  | <a href="#">Vps24</a>              | 1.005 | 0.653  | 0.534023 | 0.767997 |
| 8422 | 10548118 | <a href="#">NM_201371</a>          | <a href="#">381813</a>    | protein arginine N-methyltrans  | <a href="#">Prmt8</a>              | 1.005 | 0.167  | 0.872145 | 0.948885 |
| 8423 | 10399290 | <a href="#">NM_029107</a>          | <a href="#">74855</a>     | RIKEN cDNA 4930417G10 gene      | <a href="#">4930417G10Rik</a>      | 1.005 | 0      | 0.999635 | 0.999777 |
| 8424 | 10445702 | <a href="#">NM_198421</a>          | <a href="#">224836</a>    | ubiquitin specific peptidase 4  | <a href="#">Usp49</a>              | 1.005 | -0.3   | 0.772709 | 0.906416 |
| 8425 | 10466091 | <a href="#">NM_009580</a>          | <a href="#">22786</a>     | zona pellucida glycoprotein 1   | <a href="#">Zp1</a>                | 1.005 | 0.622  | 0.553105 | 0.782691 |
| 8426 | 10460257 | <a href="#">ENSMUST00000025794</a> | <a href="#">73458</a>     | RIKEN cDNA 1700055N04 gene      | <a href="#">1700055N04Rik</a>      | 1.005 | -0.008 | 0.993801 | 0.997702 |
| 8427 | 10420019 | <a href="#">ENSMUST00000100552</a> | <a href="#">100038376</a> | predicted gene, ENSMUSG00000007 | <a href="#">ENSMUSG00000075607</a> | 1.005 | 0.499  | 0.632377 | 0.832782 |
| 8428 | 10537204 | <a href="#">NM_178630</a>          | <a href="#">76223</a>     | ATP/GTP binding protein-like 3  | <a href="#">Agbl3</a>              | 1.005 | 0.408  | 0.69515  | 0.866183 |
| 8429 | 10496638 | <a href="#">NM_025714</a>          | <a href="#">52184</a>     | outer dense fiber of sperm tai  | <a href="#">Odf21</a>              | 1.005 | 0.33   | 0.75107  | 0.895037 |
| 8430 | 10550052 | <a href="#">NM_009095</a>          | <a href="#">20103</a>     | ribosomal protein S5            | <a href="#">Rps5</a>               | 1.005 | -0.184 | 0.859342 | 0.94355  |
| 8431 | 10583034 | <a href="#">NM_029775</a>          | <a href="#">76863</a>     | DCN1, defective in cullin nedd  | <a href="#">Dcun1d5</a>            | 1.005 | -0.034 | 0.973753 | 0.988716 |
| 8432 | 10532472 | <a href="#">NM_009469</a>          | <a href="#">22241</a>     | Unc-51 like kinase 1 (C. eleg   | <a href="#">Ulk1</a>               | 1.005 | 0.108  | 0.917147 | 0.967383 |
| 8433 | 10456021 | <a href="#">NM_177407</a>          | <a href="#">12322</a>     | calcium/calmodulin-dependent p  | <a href="#">Camk2a</a>             | 1.005 | 0.084  | 0.935563 | 0.974509 |
| 8434 | 10589420 | <a href="#">NM_007658</a>          | <a href="#">12530</a>     | cell division cycle 25 homolog  | <a href="#">Cdc25a</a>             | 1.005 | -0.21  | 0.839284 | 0.935017 |
| 8435 | 10574545 | <a href="#">NM_172759</a>          | <a href="#">234673</a>    | carboxylesterase 5              | <a href="#">Ces5</a>               | 1.005 | 0.08   | 0.938512 | 0.976028 |
| 8436 | 10368935 | <a href="#">NM_001081054</a>       | <a href="#">76563</a>     | glutaminyl-tRNA synthase (glut  | <a href="#">Qrs11</a>              | 1.005 | -0.063 | 0.951355 | 0.981144 |
| 8437 | 10525134 | <a href="#">NM_013832</a>          | <a href="#">19415</a>     | RAS protein activator like 1 (  | <a href="#">Rasal1</a>             | 1.005 | 0.132  | 0.898323 | 0.960023 |
| 8438 | 10543134 | <a href="#">NM_010886</a>          | <a href="#">17992</a>     | NADH dehydrogenase (ubiquinone  | <a href="#">Ndufa4</a>             | 1.005 | -0.506 | 0.628125 | 0.830847 |
| 8439 | 10500412 | <a href="#">NM_026229</a>          | <a href="#">67549</a>     | G protein-coupled receptor 89   | <a href="#">Gpr89</a>              | 1.005 | -0.242 | 0.815659 | 0.926149 |
| 8440 | 10579767 |                                    |                           |                                 |                                    | 1.005 | 0.259  | 0.803104 | 0.920071 |
| 8441 | 10448081 | <a href="#">NM_178615</a>          | <a href="#">68799</a>     | RGM domain family, member B     | <a href="#">Rgmb</a>               | 1.005 | -0.001 | 0.999024 | 0.999589 |
| 8442 | 10582586 | <a href="#">BC036300</a>           | <a href="#">73420</a>     | RIKEN cDNA 1700054N08 gene      | <a href="#">1700054N08Rik</a>      | 1.005 | 0.079  | 0.939312 | 0.976298 |
| 8443 | 10540822 | <a href="#">NM_172890</a>          | <a href="#">243616</a>    | solute carrier family 6 (neuro  | <a href="#">Slc6a11</a>            | 1.005 | 0.048  | 0.963078 | 0.985611 |
| 8444 | 10455249 | <a href="#">ENSMUST00000097595</a> | <a href="#">381155</a>    | RIKEN cDNA 9630014M24 gene      | <a href="#">9630014M24Rik</a>      | 1.005 | 0.023  | 0.982262 | 0.9924   |
| 8445 | 10349319 | <a href="#">NM_001012322</a>       | <a href="#">319229</a>    | secretin receptor               | <a href="#">Sctr</a>               | 1.005 | 0.35   | 0.736579 | 0.887367 |
| 8446 | 10378870 | <a href="#">NM_001004144</a>       | <a href="#">216963</a>    | G protein-coupled receptor kin  | <a href="#">Git1</a>               | 1.005 | -0.55  | 0.599125 | 0.811784 |
| 8447 | 10604665 |                                    |                           |                                 |                                    | 1.005 | 0.613  | 0.558911 | 0.786425 |
| 8448 | 10374771 |                                    |                           |                                 |                                    | 1.005 | 0.263  | 0.800063 | 0.919271 |
| 8449 | 10365056 | <a href="#">NM_018758</a>          | <a href="#">57267</a>     | amyloid beta (A4) precursor pr  | <a href="#">Apba3</a>              | 1.005 | -0.04  | 0.969078 | 0.987586 |
| 8450 | 10545760 | <a href="#">NM_146169</a>          | <a href="#">232164</a>    | poly(A) binding protein intera  | <a href="#">Paip2b</a>             | 1.005 | 0.02   | 0.984624 | 0.993504 |

|      |          |                                    |                           |                                                              |                                    |       |        |          |          |
|------|----------|------------------------------------|---------------------------|--------------------------------------------------------------|------------------------------------|-------|--------|----------|----------|
| 8451 | 10465963 | <a href="#">NM_001111140</a>       | <a href="#">278792</a>    | gene model /05, (NCBI)                                       | <a href="#">Gm/05</a>              | 1.005 | -0.597 | 0.368518 | 0.793239 |
| 8452 | 10379560 | <a href="#">NM_025884</a>          | <a href="#">66983</a>     | zinc finger protein 830                                      | <a href="#">Zfp830</a>             | 1.005 | -0.201 | 0.845911 | 0.937284 |
| 8453 | 10592266 | <a href="#">NM_020258</a>          | <a href="#">56857</a>     | solute carrier family 37 (glyc                               | <a href="#">Slc37a2</a>            | 1.005 | 0.171  | 0.869009 | 0.947569 |
| 8454 | 10556244 | <a href="#">AF357383</a>           | <a href="#">233726</a>    | importin 7                                                   | <a href="#">Ipo7</a>               | 1.005 | -0.344 | 0.74077  | 0.889595 |
| 8455 | 10384396 |                                    |                           |                                                              |                                    | 1.005 | 0.326  | 0.754036 | 0.896425 |
| 8456 | 10541083 | <a href="#">AK162833</a>           | <a href="#">330403</a>    | predicted gene, EG330403                                     | <a href="#">EG330403</a>           | 1.005 | 0.147  | 0.887424 | 0.955613 |
| 8457 | 10555055 | <a href="#">NM_024220</a>          | <a href="#">68197</a>     | NADH dehydrogenase (ubiquinone                               | <a href="#">Ndufc2</a>             | 1.005 | -0.32  | 0.757755 | 0.898294 |
| 8458 | 10401708 | <a href="#">NM_022414</a>          | <a href="#">64242</a>     | neuroglobin                                                  | <a href="#">Ngb</a>                | 1.005 | 0.05   | 0.961603 | 0.985234 |
| 8459 | 10352306 | <a href="#">NM_133705</a>          | <a href="#">69051</a>     | pyrroline-5-carboxylate reduct                               | <a href="#">Pycr2</a>              | 1.005 | -0.253 | 0.807371 | 0.922371 |
| 8460 | 10442542 | <a href="#">NM_008743</a>          | <a href="#">18207</a>     | nth (endonuclease III)-like 1                                | <a href="#">Nthl1</a>              | 1.005 | -0.117 | 0.910208 | 0.964056 |
| 8461 | 10539588 | <a href="#">NM_001007472</a>       | <a href="#">384452</a>    | notochord homolog (Xenopus lae                               | <a href="#">Noto</a>               | 1.005 | 0.001  | 0.999316 | 0.999589 |
| 8462 | 10589196 | <a href="#">NM_025407</a>          | <a href="#">22273</a>     | ubiquinol-cytochrome c reducta                               | <a href="#">Uqcrc1</a>             | 1.005 | -0.676 | 0.520004 | 0.757647 |
| 8463 | 10348468 | <a href="#">ENSMUST00000070048</a> | <a href="#">433332</a>    | predicted gene, EG433332                                     | <a href="#">EG433332</a>           | 1.005 | 0.322  | 0.756273 | 0.897871 |
| 8464 | 10438456 | <a href="#">NM_198599</a>          | <a href="#">208158</a>    | MAP6 domain containing 1                                     | <a href="#">Map6d1</a>             | 1.005 | 0.11   | 0.915764 | 0.966695 |
| 8465 | 10424416 |                                    |                           |                                                              |                                    | 1.005 | 0.842  | 0.426728 | 0.68818  |
| 8466 | 10510643 | <a href="#">NM_001004156</a>       | <a href="#">269608</a>    | pleckstrin homology domain con                               | <a href="#">Plekhg5</a>            | 1.005 | 0.336  | 0.7464   | 0.892337 |
| 8467 | 10573910 | <a href="#">NM_018826</a>          | <a href="#">54352</a>     | Iroquois related homeobox 5 (D                               | <a href="#">Irx5</a>               | 1.005 | 0.029  | 0.977509 | 0.990738 |
| 8468 | 10350197 |                                    |                           |                                                              |                                    | 1.005 | 0.123  | 0.90555  | 0.963405 |
| 8469 | 10471766 |                                    |                           |                                                              |                                    | 1.005 | 0.132  | 0.898965 | 0.960129 |
| 8470 | 10553280 | <a href="#">NM_008186</a>          | <a href="#">14884</a>     | general transcription factor I                               | <a href="#">Gtf2h1</a>             | 1.005 | -0.215 | 0.835373 | 0.933323 |
| 8471 | 10604327 | <a href="#">NM_175539</a>          | <a href="#">245403</a>    | WD repeat domain 40C                                         | <a href="#">Wdr40c</a>             | 1.005 | -0.03  | 0.976786 | 0.990463 |
| 8472 | 10565216 | <a href="#">ENSMUST00000098325</a> | <a href="#">100038384</a> | predicted gene, ENSMUSG0000007                               | <a href="#">ENSMUSG00000074038</a> | 1.005 | 0.56   | 0.592683 | 0.807299 |
| 8473 | 10347593 | <a href="#">NM_007463</a>          | <a href="#">11790</a>     | SPEG complex locus                                           | <a href="#">Speg</a>               | 1.005 | 0.204  | 0.843985 | 0.936644 |
| 8474 | 10572815 | <a href="#">NM_176940</a>          | <a href="#">319555</a>    | NACHT and WD repeat domain con                               | <a href="#">Nwd1</a>               | 1.005 | -0.145 | 0.888887 | 0.956324 |
| 8475 | 10493137 | <a href="#">NM_001033484</a>       | <a href="#">404710</a>    | IQ motif containing GTPase act                               | <a href="#">Iqqap3</a>             | 1.005 | -0.087 | 0.933347 | 0.973406 |
| 8476 | 10569389 |                                    |                           |                                                              |                                    | 1.005 | 0.453  | 0.663943 | 0.850267 |
| 8477 | 10370690 | <a href="#">NM_001003949</a>       | <a href="#">216157</a>    | open reading frame 61                                        | <a href="#">ORF61</a>              | 1.005 | -0.007 | 0.994977 | 0.998046 |
| 8478 | 10377851 | <a href="#">NM_008946</a>          | <a href="#">19175</a>     | proteasome (prosome, macropain                               | <a href="#">Psmb6</a>              | 1.005 | -0.346 | 0.739053 | 0.88873  |
| 8479 | 10363185 | <a href="#">ENSMUST00000067972</a> | <a href="#">791298</a>    | predicted gene, ENSMUSG0000005                               | <a href="#">ENSMUSG00000054758</a> | 1.005 | 0.566  | 0.588871 | 0.805202 |
| 8480 | 10514708 | <a href="#">NM_011831</a>          | <a href="#">23919</a>     | insulin-like 5                                               | <a href="#">Insl5</a>              | 1.005 | 0.455  | 0.662556 | 0.849733 |
| 8481 | 10392983 | <a href="#">NM_026071</a>          | <a href="#">67283</a>     | solute carrier family 25 (mito                               | <a href="#">Slc25a19</a>           | 1.005 | -0.399 | 0.701582 | 0.869143 |
| 8482 | 10531894 | <a href="#">BC049644</a>           | <a href="#">74218</a>     | RIKEN cDNA 1700016H13 gene                                   | <a href="#">1700016H13Rik</a>      | 1.005 | 0.389  | 0.70884  | 0.872545 |
| 8483 | 10427807 | <a href="#">NM_011294</a>          | <a href="#">20024</a>     | SUB1 homolog (S. cerevisiae)                                 | <a href="#">Sub1</a>               | 1.005 | 0.101  | 0.921999 | 0.968972 |
| 8484 | 10437151 | <a href="#">NM_019664</a>          | <a href="#">16516</a>     | potassium inwardly-rectifying                                | <a href="#">Kcnj15</a>             | 1.005 | 0.149  | 0.885583 | 0.95523  |
| 8485 | 10512156 | <a href="#">NM_016689</a>          | <a href="#">11828</a>     | aquaporin 3                                                  | <a href="#">Aqp3</a>               | 1.005 | 0.338  | 0.745199 | 0.891643 |
| 8486 | 10438232 | <a href="#">NM_010048</a>          | <a href="#">13356</a>     | DiGeorge syndrome critical reg                               | <a href="#">Dgcr2</a>              | 1.005 | -0.297 | 0.774976 | 0.907674 |
| 8487 | 10554370 | <a href="#">NM_175433</a>          | <a href="#">209225</a>    | zinc finger protein 710                                      | <a href="#">Zfp710</a>             | 1.005 | -0.439 | 0.673739 | 0.855069 |
| 8488 | 10563390 | <a href="#">NM_014181</a>          | <a href="#">19158</a>     | pleckstrin homology, Sec7 and disabled homolog 9 (Drosophila | <a href="#">Psgd2</a>              | 1.005 | -0.176 | 0.865177 | 0.946153 |
| 8489 | 10506439 | <a href="#">NM_177259</a>          | <a href="#">13134</a>     |                                                              | <a href="#">Dabd1</a>              | 1.005 | 0.419  | 0.893203 | 0.865542 |
| 8490 | 10355109 | <a href="#">NM_146250</a>          | <a href="#">241070</a>    | G protein-coupled receptor 1                                 | <a href="#">Gpr1</a>               | 1.005 | 0.112  | 0.914182 | 0.966149 |
| 8491 | 10525473 | <a href="#">NM_001039723</a>       | <a href="#">330189</a>    | transmembrane protein 120B                                   | <a href="#">Tmem120b</a>           | 1.005 | 0.313  | 0.763108 | 0.901493 |
| 8492 | 10561247 | <a href="#">NM_138676</a>          | <a href="#">192192</a>    | Sh3bp1 binding protein 1                                     | <a href="#">Shkbp1</a>             | 1.005 | -0.173 | 0.867132 | 0.946934 |
| 8493 | 10588429 | <a href="#">NM_001081309</a>       | <a href="#">75669</a>     | phosphatidylinositol 3 kinase,                               | <a href="#">Pik3r4</a>             | 1.005 | -0.413 | 0.69186  | 0.864682 |
| 8494 | 10514158 | <a href="#">NM_133948</a>          | <a href="#">101739</a>    | PC4 and SFRS1 interacting prot                               | <a href="#">Psip1</a>              | 1.005 | -0.169 | 0.870427 | 0.948285 |
| 8495 | 10504988 | <a href="#">NM_146858</a>          | <a href="#">258857</a>    | olfactory receptor 275                                       | <a href="#">Olfr275</a>            | 1.005 | 0.139  | 0.893094 | 0.957774 |
| 8496 | 10519612 | <a href="#">BC132290</a>           | <a href="#">231014</a>    | RIKEN cDNA 9330182L06 gene                                   | <a href="#">9330182L06Rik</a>      | 1.005 | -0.236 | 0.819863 | 0.928345 |
| 8497 | 10359255 | <a href="#">NM_207583</a>          | <a href="#">240843</a>    | RIKEN cDNA 6430517E21 gene                                   | <a href="#">6430517E21Rik</a>      | 1.005 | 0.522  | 0.617294 | 0.823029 |
| 8498 | 10416917 | <a href="#">NM_198601</a>          | <a href="#">212085</a>    | tripartite motif-containing 52                               | <a href="#">Trim52</a>             | 1.005 | 0.102  | 0.921562 | 0.968694 |
| 8499 | 10499945 | <a href="#">NM_028628</a>          | <a href="#">73730</a>     | late cornified envelope 1L                                   | <a href="#">Lcel1</a>              | 1.005 | -0.369 | 0.723053 | 0.879847 |
| 8500 | 10580504 | <a href="#">NM_027840</a>          | <a href="#">71607</a>     | sorting nexin 20                                             | <a href="#">Snx20</a>              | 1.004 | 0.176  | 0.865184 | 0.946153 |
| 8501 | 10497077 |                                    |                           |                                                              |                                    | 1.004 | -0.175 | 0.865897 | 0.94648  |
| 8502 | 10401322 | <a href="#">NM_025292</a>          | <a href="#">24071</a>     | synaptojanin 2 binding protein                               | <a href="#">Synj2bp</a>            | 1.004 | -0.318 | 0.759676 | 0.899311 |
| 8503 | 10381649 | <a href="#">NM_080846</a>          | <a href="#">75689</a>     | HIG1 domain family, member 1B                                | <a href="#">Higd1b</a>             | 1.004 | 0.273  | 0.792266 | 0.915409 |

|      |          |                                    |                           |                                |                                    |       |        |          |          |
|------|----------|------------------------------------|---------------------------|--------------------------------|------------------------------------|-------|--------|----------|----------|
| 8504 | 10559509 | <a href="#">NM_021454</a>          | <a href="#">58804</a>     | CDC42 effector protein (Rho GT | <a href="#">Cdc42ep5</a>           | 1.004 | -0.458 | 0.660097 | 0.848652 |
| 8505 | 10405842 | <a href="#">NM_001083890</a>       | <a href="#">238683</a>    | RIKEN cDNA 4932441B19 gene     | <a href="#">4932441B19Rik</a>      | 1.004 | 0.303  | 0.770806 | 0.905387 |
| 8506 | 10578037 |                                    |                           |                                |                                    | 1.004 | 0.141  | 0.891689 | 0.957629 |
| 8507 | 10524718 | <a href="#">NM_007475</a>          | <a href="#">11837</a>     | acidic ribosomal phosphoprotei | <a href="#">Arbp</a>               | 1.004 | -0.282 | 0.785599 | 0.912507 |
| 8508 | 10418341 | <a href="#">NM_019583</a>          | <a href="#">50905</a>     | interleukin 17 receptor B      | <a href="#">Il17rb</a>             | 1.004 | -0.373 | 0.719963 | 0.878109 |
| 8509 | 10604840 | <a href="#">ENSMUST00000116143</a> | <a href="#">631922</a>    | predicted gene, EG631922       | <a href="#">EG631922</a>           | 1.004 | 0.088  | 0.932285 | 0.973077 |
| 8510 | 10390653 | <a href="#">NM_011869</a>          | <a href="#">23989</a>     | mediator complex subunit 24    | <a href="#">Med24</a>              | 1.004 | -0.44  | 0.673148 | 0.854824 |
| 8511 | 10494839 | <a href="#">NM_144901</a>          | <a href="#">229663</a>    | cold shock domain containing E | <a href="#">Csde1</a>              | 1.004 | 0.051  | 0.960682 | 0.985069 |
| 8512 | 10575909 | <a href="#">ENSMUST00000098361</a> | <a href="#">75773</a>     | adenosine deaminase domain con | <a href="#">Adad2</a>              | 1.004 | 0.028  | 0.978155 | 0.991187 |
| 8513 | 10520405 | <a href="#">NM_001033457</a>       | <a href="#">433864</a>    | gene model 1040, (NCBI)        | <a href="#">Gm1040</a>             | 1.004 | -0.226 | 0.827764 | 0.93066  |
| 8514 | 10437573 |                                    |                           |                                |                                    | 1.004 | 0.206  | 0.842667 | 0.936227 |
| 8515 | 10398455 | <a href="#">ENSMUST00000065483</a> | <a href="#">26931</a>     | protein phosphatase 2, regulat | <a href="#">Ppp2r5c</a>            | 1.004 | -0.148 | 0.886097 | 0.955393 |
| 8516 | 10391504 | <a href="#">NM_010791</a>          | <a href="#">17285</a>     | mesenchyme homeobox 1          | <a href="#">Meox1</a>              | 1.004 | -0.004 | 0.997205 | 0.998953 |
| 8517 | 10596815 | <a href="#">NM_032543</a>          | <a href="#">84585</a>     | ring finger protein 123        | <a href="#">Rnf123</a>             | 1.004 | -0.014 | 0.98906  | 0.995308 |
| 8518 | 10349724 | <a href="#">NM_144875</a>          | <a href="#">226422</a>    | RAB7, member RAS oncogene fami | <a href="#">Rab71l</a>             | 1.004 | -0.141 | 0.892059 | 0.95769  |
| 8519 | 10497615 | <a href="#">AK005488</a>           | <a href="#">73249</a>     | RIKEN cDNA 1600017P15 gene     | <a href="#">1600017P15Rik</a>      | 1.004 | 0.321  | 0.757593 | 0.898154 |
| 8520 | 10364319 |                                    |                           |                                |                                    | 1.004 | 0.228  | 0.825746 | 0.929888 |
| 8521 | 10468030 | <a href="#">NM_177605</a>          | <a href="#">212684</a>    | PDZ domain containing 7        | <a href="#">Pdzd7</a>              | 1.004 | 0.401  | 0.699699 | 0.868422 |
| 8522 | 10464932 | <a href="#">NM_008451</a>          | <a href="#">16594</a>     | kinesin light chain 2          | <a href="#">Klc2</a>               | 1.004 | -0.012 | 0.990839 | 0.996163 |
| 8523 | 10556957 | <a href="#">BC030336</a>           | <a href="#">233812</a>    | cDNA sequence BC030336         | <a href="#">BC030336</a>           | 1.004 | -0.115 | 0.9113   | 0.964566 |
| 8524 | 10577096 | <a href="#">NM_178708</a>          | <a href="#">234069</a>    | PCI domain containing 2        | <a href="#">Pcid2</a>              | 1.004 | 0.08   | 0.938398 | 0.976019 |
| 8525 | 10545731 | <a href="#">NM_016751</a>          | <a href="#">51811</a>     | C-type lectin domain family 4, | <a href="#">Clec4f</a>             | 1.004 | 0.244  | 0.814015 | 0.925212 |
| 8526 | 10383365 | <a href="#">NM_008244</a>          | <a href="#">15239</a>     | HGF-regulated tyrosine kinase  | <a href="#">Hgs</a>                | 1.004 | 0.026  | 0.980074 | 0.991919 |
| 8527 | 10560510 | <a href="#">NM_172279</a>          | <a href="#">232944</a>    | MAP/microtubule affinity-regul | <a href="#">Mark4</a>              | 1.004 | 0.385  | 0.711235 | 0.873556 |
| 8528 | 10529410 | <a href="#">NM_026660</a>          | <a href="#">68294</a>     | major facilitator superfamily  | <a href="#">Mfsd10</a>             | 1.004 | 0.233  | 0.822591 | 0.929111 |
| 8529 | 10589976 |                                    |                           |                                |                                    | 1.004 | 0.171  | 0.868785 | 0.947491 |
| 8530 | 10581421 | <a href="#">NM_027960</a>          | <a href="#">71854</a>     | dipeptidase 3                  | <a href="#">Dpep3</a>              | 1.004 | 0.217  | 0.833993 | 0.933071 |
| 8531 | 10580010 | <a href="#">NM_177262</a>          | <a href="#">320795</a>    | protein kinase N1              | <a href="#">Pkn1</a>               | 1.004 | 0.21   | 0.839112 | 0.934917 |
| 8532 | 10514340 | <a href="#">NM_001040654</a>       | <a href="#">12578</a>     | cyclin-dependent kinase inhibi | <a href="#">Cdkn2a</a>             | 1.004 | 0.297  | 0.774694 | 0.907637 |
| 8533 | 10345457 | <a href="#">AK132955</a>           | <a href="#">211430</a>    | fer-1-like 5 (C. elegans)      | <a href="#">Fer1l5</a>             | 1.004 | 0.385  | 0.71156  | 0.873605 |
| 8534 | 10471715 | <a href="#">NM_026422</a>          | <a href="#">67871</a>     | mitochondrial ribosome recycli | <a href="#">Mrrf</a>               | 1.004 | -0.185 | 0.858612 | 0.943286 |
| 8535 | 10597913 | <a href="#">BC034133</a>           | <a href="#">66202</a>     | RIKEN cDNA 1110059G10 gene     | <a href="#">1110059G10Rik</a>      | 1.004 | -0.554 | 0.596416 | 0.809856 |
| 8536 | 10497831 | <a href="#">NM_009828</a>          | <a href="#">12428</a>     | cyclin A2                      | <a href="#">Cna2</a>               | 1.004 | -0.157 | 0.879362 | 0.952124 |
| 8537 | 10390901 | <a href="#">NM_001039502</a>       | <a href="#">629873</a>    | predicted gene, OTTMUSG0000000 | <a href="#">OTTMUSG0000004966</a>  | 1.004 | 0.311  | 0.764382 | 0.901752 |
| 8538 | 10524098 | <a href="#">BC007165</a>           | <a href="#">320875</a>    | RIKEN cDNA A830023I12 gene     | <a href="#">A830023I12Rik</a>      | 1.004 | -0.235 | 0.820794 | 0.92863  |
| 8539 | 10574429 |                                    |                           |                                |                                    | 1.004 | 0.525  | 0.615195 | 0.822023 |
| 8540 | 10429329 | <a href="#">NM_153178</a>          | <a href="#">239528</a>    | eukaryotic translation initiat | <a href="#">Eif2c2</a>             | 1.004 | -0.015 | 0.988552 | 0.995308 |
| 8541 | 10585860 | <a href="#">NM_028121</a>          | <a href="#">72141</a>     | ADP-dependent glucokinase      | <a href="#">Adpgk</a>              | 1.004 | -0.675 | 0.520717 | 0.758319 |
| 8542 | 10383953 | <a href="#">NM_080595</a>          | <a href="#">140703</a>    | EMI domain containing 1        | <a href="#">Emid1</a>              | 1.004 | -0.015 | 0.988249 | 0.995168 |
| 8543 | 10435043 | <a href="#">ENSMUST00000115149</a> | <a href="#">277203</a>    | transmembrane 4 L six family m | <a href="#">Tm4sf19</a>            | 1.004 | -0.06  | 0.953457 | 0.982042 |
| 8544 | 10402981 | <a href="#">ENSMUST00000103414</a> | <a href="#">380792</a>    | gene model 900, (NCBI)         | <a href="#">Gm900</a>              | 1.004 | 0.379  | 0.715923 | 0.875442 |
| 8545 | 10345840 | <a href="#">NM_177084</a>          | <a href="#">110895</a>    | solute carrier family 9 (sodiu | <a href="#">Slc9a4</a>             | 1.004 | 0.059  | 0.954384 | 0.982496 |
| 8546 | 10509557 | <a href="#">ENSMUST00000062902</a> | <a href="#">58213</a>     | hypothetical protein, MNCb-245 | <a href="#">AB041806</a>           | 1.004 | 0.557  | 0.594425 | 0.808629 |
| 8547 | 10467102 | <a href="#">BC052355</a>           | <a href="#">67795</a>     | RIKEN cDNA 6530404N21 gene     | <a href="#">6530404N21Rik</a>      | 1.004 | -0.308 | 0.767151 | 0.903106 |
| 8548 | 10574246 | <a href="#">NM_001033468</a>       | <a href="#">382045</a>    | G protein-coupled receptor 114 | <a href="#">Gpr114</a>             | 1.004 | -0.088 | 0.932345 | 0.973077 |
| 8549 | 10441392 | <a href="#">NM_001101560</a>       | <a href="#">621628</a>    | claudin 20                     | <a href="#">Cldn20</a>             | 1.004 | 0.251  | 0.809002 | 0.923112 |
| 8550 | 10420589 | <a href="#">ENSMUST00000089421</a> | <a href="#">100038409</a> | predicted gene, ENSMUSG0000006 | <a href="#">ENSMUSG00000068233</a> | 1.004 | 0.329  | 0.751636 | 0.895256 |
| 8551 | 10589723 | <a href="#">NM_027742</a>          | <a href="#">71268</a>     | leucine rich repeat (in FLII)  | <a href="#">Lrrfp2</a>             | 1.004 | -0.228 | 0.826006 | 0.929952 |
| 8552 | 10555844 | <a href="#">NM_147056</a>          | <a href="#">259058</a>    | olfactory receptor 646         | <a href="#">Olfr646</a>            | 1.004 | -0.023 | 0.982249 | 0.9924   |
| 8553 | 10440918 | <a href="#">NM_030018</a>          | <a href="#">77975</a>     | transmembrane protein 50B      | <a href="#">Tmem50b</a>            | 1.004 | -0.84  | 0.427847 | 0.689144 |
| 8554 | 10428103 | <a href="#">NM_019635</a>          | <a href="#">56274</a>     | serine/threonine kinase 3 (Ste | <a href="#">Stk3</a>               | 1.004 | -0.086 | 0.93409  | 0.97379  |

|      |          |                                    |                           |                                |                                    |       |        |          |          |
|------|----------|------------------------------------|---------------------------|--------------------------------|------------------------------------|-------|--------|----------|----------|
| 8555 | 10594353 | <a href="#">NM_011840</a>          | <a href="#">23938</a>     | mitogen-activated protein kina | <a href="#">Map2k5</a>             | 1.004 | -0.365 | 0.725676 | 0.881163 |
| 8556 | 10394914 | <a href="#">NM_026347</a>          | <a href="#">67732</a>     | isoamyl acetate-hydrolyzing es | <a href="#">Iah1</a>               | 1.004 | -0.805 | 0.446313 | 0.704033 |
| 8557 | 10595439 |                                    |                           |                                |                                    | 1.004 | 0.726  | 0.490464 | 0.737328 |
| 8558 | 10447417 | <a href="#">NM_010830</a>          | <a href="#">17688</a>     | mutS homolog 6 (E. coli)       | <a href="#">Msh6</a>               | 1.004 | -0.2   | 0.847252 | 0.938167 |
| 8559 | 10498064 | <a href="#">NM_080793</a>          | <a href="#">73251</a>     | SET domain containing (lysine  | <a href="#">Setd7</a>              | 1.004 | -0.322 | 0.756615 | 0.897871 |
| 8560 | 10520371 | <a href="#">NM_028234</a>          | <a href="#">381626</a>    | proline rich 8                 | <a href="#">Prr8</a>               | 1.004 | 0.123  | 0.905836 | 0.963405 |
| 8561 | 10456812 | <a href="#">ENSMUST00000097522</a> | <a href="#">76987</a>     | haloacid dehalogenase-like hyd | <a href="#">Hdhd2</a>              | 1.004 | 0.342  | 0.742332 | 0.890171 |
| 8562 | 10564417 | <a href="#">NM_053080</a>          | <a href="#">56847</a>     | aldehyde dehydrogenase family  | <a href="#">Aldh1a3</a>            | 1.003 | 0.114  | 0.912064 | 0.96491  |
| 8563 | 10506743 | <a href="#">BC019215</a>           | <a href="#">74098</a>     | RIKEN cDNA 0610037L13 gene     | <a href="#">O610037L13Rik</a>      | 1.003 | -0.051 | 0.960987 | 0.985069 |
| 8564 | 10578681 |                                    |                           |                                |                                    | 1.003 | 0.433  | 0.677389 | 0.856571 |
| 8565 | 10429776 | <a href="#">NM_144848</a>          | <a href="#">223650</a>    | epiplakin 1                    | <a href="#">Eppk1</a>              | 1.003 | 0.503  | 0.63015  | 0.831393 |
| 8566 | 10391066 | <a href="#">NM_010663</a>          | <a href="#">16667</a>     | keratin 17                     | <a href="#">Krt17</a>              | 1.003 | 0.423  | 0.684476 | 0.860387 |
| 8567 | 10477460 |                                    |                           |                                |                                    | 1.003 | 0.392  | 0.706659 | 0.871942 |
| 8568 | 10526869 |                                    |                           |                                |                                    | 1.003 | 0.621  | 0.553952 | 0.783357 |
| 8569 | 10542140 | <a href="#">NM_153094</a>          | <a href="#">232408</a>    | killer cell lectin-like recept | <a href="#">Klr1f</a>              | 1.003 | -0.147 | 0.88696  | 0.955613 |
| 8570 | 10451611 |                                    |                           |                                |                                    | 1.003 | 0.039  | 0.969986 | 0.987783 |
| 8571 | 10354267 | <a href="#">NM_001013799</a>       | <a href="#">433294</a>    | RIKEN cDNA A530098C11 gene     | <a href="#">A530098C11Rik</a>      | 1.003 | -0.065 | 0.950052 | 0.980663 |
| 8572 | 10603742 |                                    |                           |                                |                                    | 1.003 | 0.795  | 0.452215 | 0.708922 |
| 8573 | 10408049 | <a href="#">NM_139141</a>          | <a href="#">93681</a>     | zinc finger protein 192        | <a href="#">Zfp192</a>             | 1.003 | 0.023  | 0.982332 | 0.9924   |
| 8574 | 10351792 | <a href="#">NM_029612</a>          | <a href="#">98365</a>     | SLAM family member 9           | <a href="#">Slamf9</a>             | 1.003 | 0.129  | 0.900663 | 0.96078  |
| 8575 | 10523245 |                                    |                           |                                |                                    | 1.003 | 0.399  | 0.701194 | 0.869046 |
| 8576 | 10600310 | <a href="#">NM_019404</a>          | <a href="#">12000</a>     | arginine vasopressin receptor  | <a href="#">Avpr2</a>              | 1.003 | 0.153  | 0.882222 | 0.953469 |
| 8577 | 10606064 | <a href="#">NM_183318</a>          | <a href="#">331474</a>    | retrotransposon gag domain con | <a href="#">Rgag4</a>              | 1.003 | -0.035 | 0.972912 | 0.98829  |
| 8578 | 10481711 | <a href="#">NM_001113569</a>       | <a href="#">20910</a>     | syntaxin binding protein 1     | <a href="#">Stxbp1</a>             | 1.003 | -0.769 | 0.466263 | 0.719571 |
| 8579 | 10588874 | <a href="#">AK154501</a>           | <a href="#">100048896</a> | predicted gene, ENSMUSG0000007 | <a href="#">ENSMUSG00000074081</a> | 1.003 | 0.265  | 0.798459 | 0.918432 |
| 8580 | 10379215 | <a href="#">NM_018854</a>          | <a href="#">55978</a>     | intraflagellar transport 20 ho | <a href="#">Ift20</a>              | 1.003 | -0.391 | 0.707017 | 0.872175 |
| 8581 | 10371082 | <a href="#">NM_027120</a>          | <a href="#">69564</a>     | integrin beta 1 binding protei | <a href="#">Itgb1bp3</a>           | 1.003 | 0.263  | 0.800249 | 0.919317 |
| 8582 | 10439744 | <a href="#">NM_032465</a>          | <a href="#">84544</a>     | CD96 antigen                   | <a href="#">Cd96</a>               | 1.003 | -0.1   | 0.922752 | 0.969148 |
| 8583 | 10524436 | <a href="#">NM_001033202</a>       | <a href="#">100756</a>    | ubiquitin specific peptidase 3 | <a href="#">Usp30</a>              | 1.003 | -0.361 | 0.728567 | 0.882433 |
| 8584 | 10361091 | <a href="#">NM_007498</a>          | <a href="#">11910</a>     | activating transcription facto | <a href="#">Atf3</a>               | 1.003 | 0.049  | 0.962153 | 0.985362 |
| 8585 | 10520800 | <a href="#">NM_133756</a>          | <a href="#">74254</a>     | GPN-loop GTPase 1              | <a href="#">Gpn1</a>               | 1.003 | -0.207 | 0.842108 | 0.936059 |
| 8586 | 10405511 | <a href="#">NM_145975</a>          | <a href="#">212880</a>    | DEAD (Asp-Glu-Ala-Asp) box pol | <a href="#">Ddx46</a>              | 1.003 | -0.158 | 0.87844  | 0.95179  |
| 8587 | 10528029 |                                    |                           |                                |                                    | 1.003 | -0.308 | 0.766745 | 0.902924 |
| 8588 | 10417933 | <a href="#">NM_021508</a>          | <a href="#">59011</a>     | myozenin 1                     | <a href="#">Myoz1</a>              | 1.003 | 0.057  | 0.955787 | 0.98316  |
| 8589 | 10447356 | <a href="#">NM_019654</a>          | <a href="#">56468</a>     | suppressor of cytokine signali | <a href="#">Soxs5</a>              | 1.003 | -0.029 | 0.977371 | 0.990677 |
| 8590 | 10578557 | <a href="#">NM_001001184</a>       | <a href="#">408022</a>    | coiled-coil domain containing  | <a href="#">Ccdc111</a>            | 1.003 | -0.38  | 0.714587 | 0.875126 |
| 8591 | 10349993 | <a href="#">NM_031189</a>          | <a href="#">17928</a>     | myogenin                       | <a href="#">Myog</a>               | 1.003 | 0.229  | 0.825326 | 0.929712 |
| 8592 | 10584777 | <a href="#">NM_001110826</a>       | <a href="#">13209</a>     | DEAD (Asp-Glu-Ala-Asp) box pol | <a href="#">Ddx6</a>               | 1.003 | -0.255 | 0.806174 | 0.921832 |
| 8593 | 10579724 | <a href="#">NM_177766</a>          | <a href="#">270066</a>    | solute carrier family 35-memb  | <a href="#">Slc35e1</a>            | 1.003 | 0.008  | 0.994151 | 0.997702 |
| 8594 | 10480878 | <a href="#">NM_001115076</a>       | <a href="#">227634</a>    | calmodulin regulated spectrin- | <a href="#">Camsap1</a>            | 1.003 | -0.209 | 0.840597 | 0.935557 |
| 8595 | 10450431 | <a href="#">NM_148939</a>          | <a href="#">266614</a>    | lymphocyte antigen 6 complex,  | <a href="#">Ly6g5b</a>             | 1.003 | -0.146 | 0.888168 | 0.955939 |
| 8596 | 10459075 | <a href="#">NM_133363</a>          | <a href="#">170947</a>    | myozenin 3                     | <a href="#">Myoz3</a>              | 1.003 | 0.128  | 0.901717 | 0.961371 |
| 8597 | 10383708 | <a href="#">NM_145355</a>          | <a href="#">193670</a>    | ring finger protein 185        | <a href="#">Rnf185</a>             | 1.003 | 0.608  | 0.561562 | 0.788656 |
| 8598 | 10356339 | <a href="#">NM_008801</a>          | <a href="#">18582</a>     | phosphodiesterase 6D, cGMP-spe | <a href="#">Pde6d</a>              | 1.003 | -0.237 | 0.819619 | 0.928312 |
| 8599 | 10586246 | <a href="#">XM_001476259</a>       | <a href="#">102442</a>    | DENN/MADD domain containing 4A | <a href="#">Dennd4a</a>            | 1.003 | 0.717  | 0.49605  | 0.740712 |
| 8600 | 10472382 | <a href="#">NM_001099298</a>       | <a href="#">110876</a>    | sodium channel, voltage-gated, | <a href="#">Scn2a1</a>             | 1.003 | 0.397  | 0.703133 | 0.869747 |
| 8601 | 10397786 | <a href="#">ENSMUST00000116071</a> | <a href="#">74947</a>     | RIKEN cDNA 4930463M05 gene     | <a href="#">4930463M05Rik</a>      | 1.003 | -0.074 | 0.943402 | 0.977948 |
| 8602 | 10550296 | <a href="#">NM_198631</a>          | <a href="#">330474</a>    | zinc finger CCCH-type containi | <a href="#">Zc3h4</a>              | 1.003 | -0.047 | 0.963677 | 0.985728 |
| 8603 | 10550706 | <a href="#">ENSMUST00000011407</a> | <a href="#">74463</a>     | exocyst complex component 3-li | <a href="#">Exoc3l2</a>            | 1.003 | 0.268  | 0.796475 | 0.917464 |
| 8604 | 10523518 | <a href="#">NM_026421</a>          | <a href="#">67870</a>     | enolase-phosphatase 1          | <a href="#">Enoph1</a>             | 1.003 | -0.003 | 0.997922 | 0.999268 |
| 8605 | 10545099 |                                    |                           |                                |                                    | 1.003 | 0.273  | 0.792463 | 0.91549  |

|      |          |                                    |                        |                                |                               |       |        |          |          |
|------|----------|------------------------------------|------------------------|--------------------------------|-------------------------------|-------|--------|----------|----------|
| 8606 | 10533428 | <a href="#">NM_183307</a>          | <a href="#">330188</a> | coiled-coil domain containing  | <a href="#">Ccdc63</a>        | 1.003 | 0.221  | 0.830968 | 0.932182 |
| 8607 | 10366703 | <a href="#">ENSMUST00000116001</a> | <a href="#">216394</a> | predicted gene, EG216394       | <a href="#">EG216394</a>      | 1.003 | 0.226  | 0.827234 | 0.930659 |
| 8608 | 10500720 | <a href="#">BC094925</a>           | <a href="#">242126</a> | solute carrier family 22 (orga | <a href="#">Slc22a15</a>      | 1.003 | 0.051  | 0.960845 | 0.985069 |
| 8609 | 10438069 |                                    |                        |                                |                               | 1.003 | 0.117  | 0.909938 | 0.964056 |
| 8610 | 10443112 | <a href="#">NM_001005916</a>       | <a href="#">474156</a> | zinc finger and BTB domain con | <a href="#">Zbtb9</a>         | 1.003 | -0.136 | 0.895236 | 0.958812 |
| 8611 | 10462451 | <a href="#">NM_025741</a>          | <a href="#">66745</a>  | tumor protein D52-like 3       | <a href="#">Trpd52l3</a>      | 1.003 | 0.119  | 0.908354 | 0.963723 |
| 8612 | 10416302 | <a href="#">NM_021877</a>          | <a href="#">15460</a>  | hairless                       | <a href="#">Hr</a>            | 1.003 | 0.389  | 0.708434 | 0.872343 |
| 8613 | 10420225 | <a href="#">NM_010780</a>          | <a href="#">17228</a>  | chymase 1, mast cell           | <a href="#">Cma1</a>          | 1.003 | 0.433  | 0.677492 | 0.85665  |
| 8614 | 10433717 |                                    |                        |                                |                               | 1.003 | 0.417  | 0.6889   | 0.863319 |
| 8615 | 10420516 | <a href="#">NM_027986</a>          | <a href="#">71891</a>  | cytidine and dCMP deaminase do | <a href="#">Cdade1</a>        | 1.003 | -0.189 | 0.855273 | 0.941477 |
| 8616 | 10538939 | <a href="#">NM_010121</a>          | <a href="#">13666</a>  | eukaryotic translation initiat | <a href="#">Eif2ak3</a>       | 1.003 | -0.367 | 0.724222 | 0.88056  |
| 8617 | 10390869 | <a href="#">NM_213730</a>          | <a href="#">237934</a> | keratin 39                     | <a href="#">Krt39</a>         | 1.003 | -0.083 | 0.936058 | 0.974832 |
| 8618 | 10369885 | <a href="#">NM_134007</a>          | <a href="#">52637</a>  | CDGSH iron sulfur domain 1     | <a href="#">Cisd1</a>         | 1.003 | -0.284 | 0.784228 | 0.912068 |
| 8619 | 10507719 | <a href="#">NM_177570</a>          | <a href="#">194219</a> | schlafen like 1                | <a href="#">Slfn1</a>         | 1.003 | 0.143  | 0.890086 | 0.956731 |
| 8620 | 10464603 | <a href="#">NM_016666</a>          | <a href="#">11632</a>  | aryl-hydrocarbon receptor-inte | <a href="#">Aip</a>           | 1.003 | -0.735 | 0.48571  | 0.73398  |
| 8621 | 10378681 | <a href="#">NM_008916</a>          | <a href="#">19062</a>  | putative phosphatase           | <a href="#">RP23-136K12.4</a> | 1.003 | -0.452 | 0.664791 | 0.85061  |
| 8622 | 10360058 | <a href="#">NM_001037170</a>       | <a href="#">641376</a> | translocase of outer mitochond | <a href="#">Tomm40l</a>       | 1.003 | -0.313 | 0.763429 | 0.901503 |
| 8623 | 10553148 | <a href="#">NM_001033243</a>       | <a href="#">211535</a> | coiled-coil domain containing  | <a href="#">Ccdc114</a>       | 1.003 | -0.132 | 0.898768 | 0.960077 |
| 8624 | 10456622 | <a href="#">NM_013594</a>          | <a href="#">17190</a>  | methyl-CpG binding domain prot | <a href="#">Mbd1</a>          | 1.003 | -0.183 | 0.859636 | 0.943578 |
| 8625 | 10577922 | <a href="#">NM_207659</a>          | <a href="#">320191</a> | hook homolog 3 (Drosophila)    | <a href="#">Hook3</a>         | 1.003 | -0.098 | 0.924826 | 0.970324 |
| 8626 | 10479058 | <a href="#">BC050790</a>           | <a href="#">72221</a>  | RIKEN cDNA 1700021F07 gene     | <a href="#">1700021F07Rik</a> | 1.003 | -0.159 | 0.877709 | 0.951715 |
| 8627 | 10432767 | <a href="#">NR_003960</a>          | <a href="#">432987</a> | predicted gene, EG432987       | <a href="#">EG432987</a>      | 1.003 | 0.128  | 0.901805 | 0.961392 |
| 8628 | 10467859 | <a href="#">NM_144874</a>          | <a href="#">226139</a> | COX15 homolog, cytochrome c ox | <a href="#">Cox15</a>         | 1.003 | -0.345 | 0.739885 | 0.889275 |
| 8629 | 10344950 | <a href="#">XM_001473720</a>       | <a href="#">675046</a> | similar to 60S ribosomal prote | <a href="#">LOC675046</a>     | 1.003 | 0.142  | 0.890871 | 0.957386 |
| 8630 | 10388098 | <a href="#">NM_053245</a>          | <a href="#">114230</a> | aryl hydrocarbon receptor-inte | <a href="#">Aipl1</a>         | 1.003 | 0.058  | 0.955425 | 0.982946 |
| 8631 | 10515844 | <a href="#">NM_183140</a>          | <a href="#">195522</a> | zinc finger protein 691        | <a href="#">Zfp691</a>        | 1.003 | 0.228  | 0.826054 | 0.929952 |
| 8632 | 10539017 | <a href="#">NM_178608</a>          | <a href="#">52250</a>  | receptor accessory protein 1   | <a href="#">Reep1</a>         | 1.003 | 0.407  | 0.695617 | 0.866211 |
| 8633 | 10597136 | <a href="#">NM_001081043</a>       | <a href="#">104831</a> | protein tyrosine phosphatase,  | <a href="#">Ptpn23</a>        | 1.003 | -0.182 | 0.86048  | 0.943954 |
| 8634 | 10461991 | <a href="#">NM_009551</a>          | <a href="#">22682</a>  | zinc finger, AN1-type domain 5 | <a href="#">Zfand5</a>        | 1.003 | 0.026  | 0.979583 | 0.991919 |
| 8635 | 10426030 | <a href="#">NM_028063</a>          | <a href="#">72026</a>  | tRNA 5-methylaminomethyl-2-thi | <a href="#">Trmu</a>          | 1.003 | -0.664 | 0.527561 | 0.763239 |
| 8636 | 10349442 | <a href="#">NM_028399</a>          | <a href="#">72949</a>  | cyclin T2                      | <a href="#">Cnt2</a>          | 1.003 | 0.025  | 0.980895 | 0.991919 |
| 8637 | 10411306 | <a href="#">NM_012048</a>          | <a href="#">27015</a>  | polymerase (DNA directed), kap | <a href="#">Polk</a>          | 1.003 | -0.182 | 0.860892 | 0.944057 |
| 8638 | 10348537 | <a href="#">NM_016894</a>          | <a href="#">51801</a>  | receptor (calcitonin) activity | <a href="#">Ramp1</a>         | 1.003 | -0.036 | 0.972366 | 0.98815  |
| 8639 | 10456814 | <a href="#">NM_008602</a>          | <a href="#">17344</a>  | protein inhibitor of activated | <a href="#">Pias2</a>         | 1.002 | 0.069  | 0.946598 | 0.978837 |
| 8640 | 10480121 | <a href="#">NM_024185</a>          | <a href="#">66960</a>  | RIKEN cDNA 2310047O13 gene     | <a href="#">2310047O13Rik</a> | 1.002 | -0.103 | 0.920505 | 0.968204 |
| 8641 | 10606362 |                                    |                        |                                |                               | 1.002 | 0.074  | 0.942852 | 0.977825 |
| 8642 | 10474606 | <a href="#">NM_029232</a>          | <a href="#">75275</a>  | RIKEN cDNA 4930563P21 gene     | <a href="#">4930563P21Rik</a> | 1.002 | 0.176  | 0.865304 | 0.946164 |
| 8643 | 10351903 | <a href="#">NM_146305</a>          | <a href="#">258302</a> | olfactory receptor 420         | <a href="#">Olfr420</a>       | 1.002 | 0.18   | 0.862452 | 0.944945 |
| 8644 | 10538993 | <a href="#">NM_001081110</a>       | <a href="#">12525</a>  | CD8 antigen, alpha chain       | <a href="#">Cd8a</a>          | 1.002 | 0.286  | 0.782672 | 0.911672 |
| 8645 | 10461934 | <a href="#">NM_153417</a>          | <a href="#">225997</a> | transient receptor potential c | <a href="#">Trpm6</a>         | 1.002 | -0.071 | 0.945172 | 0.978396 |
| 8646 | 10399675 | <a href="#">XM_911478</a>          | <a href="#">629364</a> | similar to actin related prote | <a href="#">LOC629364</a>     | 1.002 | -0.246 | 0.812783 | 0.924689 |
| 8647 | 10443369 | <a href="#">BC049559</a>           | <a href="#">67645</a>  | RIKEN cDNA 4930511I11 gene     | <a href="#">4930511I11Rik</a> | 1.002 | 0.161  | 0.876193 | 0.950949 |
| 8648 | 10435019 | <a href="#">BC125555</a>           | <a href="#">69576</a>  | RIKEN cDNA 2310010M20 gene     | <a href="#">2310010M20Rik</a> | 1.002 | 0.442  | 0.671511 | 0.854195 |
| 8649 | 10494804 | <a href="#">NM_009814</a>          | <a href="#">12373</a>  | calsequestrin 2                | <a href="#">Casq2</a>         | 1.002 | 0.498  | 0.633411 | 0.833323 |
| 8650 | 10605952 |                                    |                        |                                |                               | 1.002 | 0.26   | 0.802064 | 0.919826 |
| 8651 | 10540554 | <a href="#">NM_028385</a>          | <a href="#">72895</a>  | SET domain containing 5        | <a href="#">Setd5</a>         | 1.002 | -0.078 | 0.940011 | 0.976656 |
| 8652 | 10378038 | <a href="#">NM_177618</a>          | <a href="#">216881</a> | WSC domain containing 1        | <a href="#">Wscd1</a>         | 1.002 | 0.157  | 0.879399 | 0.952124 |
| 8653 | 10499470 | <a href="#">NM_028188</a>          | <a href="#">72296</a>  | RUN and SH3 domain containing  | <a href="#">Rusc1</a>         | 1.002 | -0.205 | 0.843441 | 0.936586 |
| 8654 | 10481457 | <a href="#">NM_139302</a>          | <a href="#">227700</a> | SH3-domain GRB2-like endophili | <a href="#">Sh3glb2</a>       | 1.002 | 0.22   | 0.831703 | 0.932437 |
| 8655 | 10405811 | <a href="#">NM_019986</a>          | <a href="#">56541</a>  | hyaluronic acid binding protei | <a href="#">Habp4</a>         | 1.002 | -1.035 | 0.33412  | 0.609656 |
| 8656 | 10510991 | <a href="#">NM_001081100</a>       | <a href="#">76866</a>  | MORN repeat containing 1       | <a href="#">Morn1</a>         | 1.002 | 0.167  | 0.872084 | 0.948867 |
| 8657 | 10577604 | <a href="#">NM_018743</a>          | <a href="#">102247</a> | 1-acylglycerol-3-phosphate O-a | <a href="#">Acpaf6</a>        | 1.002 | -0.236 | 0.81996  | 0.928345 |

|      |          |                                    |                           |                                |                                    |       |        |          |          |
|------|----------|------------------------------------|---------------------------|--------------------------------|------------------------------------|-------|--------|----------|----------|
| 8658 | 10402551 |                                    |                           |                                |                                    | 1.002 | 0.109  | 0.915906 | 0.966745 |
| 8659 | 10572212 | <a href="#">NM_198101</a>          | <a href="#">78816</a>     | Gem-interacting protein        | <a href="#">Gmip</a>               | 1.002 | 0.226  | 0.827117 | 0.930659 |
| 8660 | 10552006 | <a href="#">ENSMUST00000085702</a> | <a href="#">233075</a>    | predicted gene, EG233075       | <a href="#">EG233075</a>           | 1.002 | -0.034 | 0.973555 | 0.988697 |
| 8661 | 10426439 | <a href="#">NM_146062</a>          | <a href="#">223828</a>    | periphilin 1                   | <a href="#">Pphln1</a>             | 1.002 | -0.596 | 0.569693 | 0.794081 |
| 8662 | 10555280 | <a href="#">NM_133709</a>          | <a href="#">69121</a>     | chordin-like 2                 | <a href="#">Chrdl2</a>             | 1.002 | -0.016 | 0.987457 | 0.994834 |
| 8663 | 10364109 | <a href="#">NM_009514</a>          | <a href="#">22364</a>     | pre-B lymphocyte gene 3        | <a href="#">Vpreb3</a>             | 1.002 | 0.295  | 0.776383 | 0.908709 |
| 8664 | 10346928 |                                    |                           |                                |                                    | 1.002 | 0.96   | 0.368247 | 0.639105 |
| 8665 | 10583254 | <a href="#">NM_023153</a>          | <a href="#">66070</a>     | CWC15 homolog (S. cerevisiae)  | <a href="#">Cwc15</a>              | 1.002 | -0.406 | 0.696429 | 0.866754 |
| 8666 | 10551382 | <a href="#">NM_175107</a>          | <a href="#">66367</a>     | RIKEN cDNA 2310022A10 gene     | <a href="#">2310022A10Rik</a>      | 1.002 | -0.094 | 0.927913 | 0.971746 |
| 8667 | 10490502 | <a href="#">NM_178254</a>          | <a href="#">277353</a>    | transcription factor-like 5 (b | <a href="#">Tcf15</a>              | 1.002 | 0.278  | 0.789033 | 0.914104 |
| 8668 | 10571737 | <a href="#">ENSMUST00000098781</a> | <a href="#">546058</a>    | hypothetical protein LOC546058 | <a href="#">LOC546058</a>          | 1.002 | -0.01  | 0.992467 | 0.997088 |
| 8669 | 10360909 | <a href="#">ENSMUST00000053934</a> | <a href="#">319562</a>    | RIKEN cDNA 9630028B13 gene     | <a href="#">9630028B13Rik</a>      | 1.002 | 0.217  | 0.834305 | 0.933071 |
| 8670 | 10476759 | <a href="#">NM_028724</a>          | <a href="#">74030</a>     | Ras and Rab interactor 2       | <a href="#">Rin2</a>               | 1.002 | -0.461 | 0.658248 | 0.847092 |
| 8671 | 10470320 |                                    |                           |                                |                                    | 1.002 | -0.132 | 0.898271 | 0.960023 |
| 8672 | 10481111 |                                    |                           |                                |                                    | 1.002 | 0.226  | 0.827819 | 0.93066  |
| 8673 | 10387620 | <a href="#">NM_019871</a>          | <a href="#">56293</a>     | acyl-malonyl condensing enzyme | <a href="#">Amac1</a>              | 1.002 | -0.117 | 0.910135 | 0.964056 |
| 8674 | 10394060 | <a href="#">NM_026907</a>          | <a href="#">58210</a>     | secreted and transmembrane 1B  | <a href="#">Sectm1b</a>            | 1.002 | 0.347  | 0.738615 | 0.88853  |
| 8675 | 10397476 | <a href="#">BC026384</a>           | <a href="#">217732</a>    | RIKEN cDNA 2310044G17 gene     | <a href="#">2310044G17Rik</a>      | 1.002 | -0.01  | 0.991964 | 0.99682  |
| 8676 | 10504017 | <a href="#">NM_023739</a>          | <a href="#">74164</a>     | nuclear transcription factor,  | <a href="#">Nfx1</a>               | 1.002 | -0.065 | 0.950217 | 0.980737 |
| 8677 | 10397085 | <a href="#">NM_027349</a>          | <a href="#">67039</a>     | RNA binding motif protein 25   | <a href="#">Rbm25</a>              | 1.002 | 0.118  | 0.909543 | 0.964056 |
| 8678 | 10502949 |                                    |                           |                                |                                    | 1.002 | -0.039 | 0.969871 | 0.987764 |
| 8679 | 10347218 |                                    |                           |                                |                                    | 1.002 | -0.05  | 0.961707 | 0.985234 |
| 8680 | 10461765 | <a href="#">NM_134152</a>          | <a href="#">107321</a>    | leupaxin                       | <a href="#">Lpxn</a>               | 1.002 | 0.118  | 0.909312 | 0.963879 |
| 8681 | 10401564 | <a href="#">BC060658</a>           | <a href="#">68497</a>     | RIKEN cDNA 1110018G07 gene     | <a href="#">1110018G07Rik</a>      | 1.002 | -0.091 | 0.929671 | 0.972207 |
| 8682 | 10430723 | <a href="#">AJ006341</a>           | <a href="#">20524</a>     | solute carrier family 25 (mito | <a href="#">Slc25a17</a>           | 1.002 | 0.07   | 0.946123 | 0.978614 |
| 8683 | 10439848 | <a href="#">XR_035106</a>          | <a href="#">224180</a>    | predicted gene, EG224180       | <a href="#">EG224180</a>           | 1.002 | 0.255  | 0.805624 | 0.921565 |
| 8684 | 10506939 | <a href="#">NM_007943</a>          | <a href="#">13858</a>     | epidermal growth factor recept | <a href="#">Eps15</a>              | 1.002 | -0.4   | 0.700812 | 0.868962 |
| 8685 | 10478615 | <a href="#">NM_146129</a>          | <a href="#">228866</a>    | RIKEN cDNA F730014I05 gene     | <a href="#">F730014I05Rik</a>      | 1.002 | -0.085 | 0.934572 | 0.973973 |
| 8686 | 10595407 | <a href="#">NM_001081282</a>       | <a href="#">108837</a>    | inhibitor of Bruton agammaglob | <a href="#">Ibtk</a>               | 1.002 | -0.421 | 0.685755 | 0.861188 |
| 8687 | 10354157 | <a href="#">NM_145142</a>          | <a href="#">98388</a>     | carbohydrate sulfotransferase  | <a href="#">Chst10</a>             | 1.002 | 0.086  | 0.934026 | 0.973771 |
| 8688 | 10487595 |                                    |                           |                                |                                    | 1.002 | -0.012 | 0.99045  | 0.995913 |
| 8689 | 10375545 | <a href="#">NM_146470</a>          | <a href="#">258462</a>    | olfactory receptor 1392        | <a href="#">Olfir1392</a>          | 1.002 | 0.047  | 0.963638 | 0.985728 |
| 8690 | 10440552 | <a href="#">NM_001081068</a>       | <a href="#">78913</a>     | zinc finger protein 294        | <a href="#">Zfp294</a>             | 1.002 | -0.123 | 0.905427 | 0.963335 |
| 8691 | 10453055 | <a href="#">ENSMUST00000097280</a> | <a href="#">100038718</a> | predicted gene, ENSMUSG0000007 | <a href="#">ENSMUSG00000073373</a> | 1.002 | -0.057 | 0.956118 | 0.983285 |
| 8692 | 10493803 | <a href="#">NM_011310</a>          | <a href="#">20197</a>     | S100 calcium binding protein A | <a href="#">S100a3</a>             | 1.002 | 0.155  | 0.881282 | 0.953061 |
| 8693 | 10519048 | <a href="#">NM_028513</a>          | <a href="#">73353</a>     | actin-related protein T2       | <a href="#">Actr2</a>              | 1.002 | 0.27   | 0.794691 | 0.916664 |
| 8694 | 10574812 | <a href="#">NM_181322</a>          | <a href="#">13018</a>     | CCCTC-binding factor           | <a href="#">Ctcf</a>               | 1.002 | -0.202 | 0.845346 | 0.937238 |
| 8695 | 10435982 | <a href="#">NM_001037719</a>       | <a href="#">208154</a>    | B and T lymphocyte associated  | <a href="#">Btla</a>               | 1.002 | 0.561  | 0.591765 | 0.806879 |
| 8696 | 10507840 | <a href="#">NM_013905</a>          | <a href="#">56198</a>     | hairy/enhancer-of-split relate | <a href="#">Heyl</a>               | 1.002 | -0.106 | 0.918752 | 0.967805 |
| 8697 | 10434922 |                                    |                           |                                |                                    | 1.002 | -0.184 | 0.859145 | 0.943452 |
| 8698 | 10417128 |                                    |                           |                                |                                    | 1.002 | 0.361  | 0.7286   | 0.882433 |
| 8699 | 10541184 |                                    |                           |                                |                                    | 1.002 | 0.341  | 0.742583 | 0.890291 |
| 8700 | 10388409 | <a href="#">NM_026653</a>          | <a href="#">68275</a>     | replication protein A1         | <a href="#">Rpa1</a>               | 1.002 | -0.401 | 0.699854 | 0.868513 |
| 8701 | 10389170 | <a href="#">NM_001013759</a>       | <a href="#">237891</a>    | growth arrest-specific 2 like  | <a href="#">Gas2l2</a>             | 1.002 | 0.496  | 0.63496  | 0.834095 |
| 8702 | 10495712 | <a href="#">NM_007378</a>          | <a href="#">11304</a>     | ATP-binding cassette, sub-fami | <a href="#">Abca4</a>              | 1.002 | 0.362  | 0.727548 | 0.881884 |
| 8703 | 10442081 |                                    |                           |                                |                                    | 1.002 | 0.364  | 0.726348 | 0.881516 |
| 8704 | 10417620 | <a href="#">NM_080433</a>          | <a href="#">54713</a>     | Fez family zinc finger 2       | <a href="#">Fezf2</a>              | 1.002 | 0.115  | 0.911207 | 0.964566 |
| 8705 | 10522303 | <a href="#">NM_172711</a>          | <a href="#">231279</a>    | GUF1 GTPase homolog (S. cerevi | <a href="#">Guf1</a>               | 1.002 | 0.181  | 0.861381 | 0.944316 |
| 8706 | 10450296 | <a href="#">NM_021337</a>          | <a href="#">108077</a>    | superkiller viralicidic activi | <a href="#">Skiv2l</a>             | 1.002 | 0.095  | 0.927116 | 0.971253 |
| 8707 | 10591494 | <a href="#">NM_053190</a>          | <a href="#">94226</a>     | endothelial differentiation, s | <a href="#">Edg8</a>               | 1.002 | 0.234  | 0.821636 | 0.92863  |

|      |          |                                    |                        |                                |                                    |       |        |          |          |
|------|----------|------------------------------------|------------------------|--------------------------------|------------------------------------|-------|--------|----------|----------|
| 8708 | 10465508 | <a href="#">NM_207220</a>          | <a href="#">107173</a> | G protein-coupled receptor 137 | <a href="#">Gpr137</a>             | 1.002 | 0.587  | 0.574905 | 0.797076 |
| 8709 | 10556059 | <a href="#">NM_029660</a>          | <a href="#">76572</a>  | RNA binding motif protein, X-1 | <a href="#">Rbmx12</a>             | 1.002 | -0.136 | 0.895345 | 0.958881 |
| 8710 | 10411839 | <a href="#">NM_172592</a>          | <a href="#">218543</a> | splicing factor, arginine/seri | <a href="#">Sfrs12</a>             | 1.002 | 0.191  | 0.854166 | 0.941009 |
| 8711 | 10392300 | <a href="#">NM_176850</a>          | <a href="#">207165</a> | bromodomain PHD finger transcr | <a href="#">Bptf</a>               | 1.002 | -0.401 | 0.700101 | 0.868717 |
| 8712 | 10562323 | <a href="#">NM_207212</a>          | <a href="#">101543</a> | WT1-interacting protein        | <a href="#">Wtip</a>               | 1.002 | -0.4   | 0.700579 | 0.86896  |
| 8713 | 10516518 | <a href="#">NM_205823</a>          | <a href="#">384059</a> | toll-like receptor 12          | <a href="#">Tlr12</a>              | 1.002 | -0.103 | 0.920941 | 0.968408 |
| 8714 | 10571128 | <a href="#">NM_054057</a>          | <a href="#">114863</a> | proline synthetase co-transcri | <a href="#">Prosc</a>              | 1.002 | -0.613 | 0.558868 | 0.786425 |
| 8715 | 10571612 | <a href="#">NM_001033246</a>       | <a href="#">212392</a> | coiled-coil domain containing  | <a href="#">Ccdc110</a>            | 1.002 | 0.488  | 0.639816 | 0.83668  |
| 8716 | 10564618 | <a href="#">AK080460</a>           | <a href="#">320262</a> | RIKEN cDNA A830073O21 gene     | <a href="#">A830073O21Rik</a>      | 1.002 | 0.113  | 0.912742 | 0.965173 |
| 8717 | 10561025 | <a href="#">NM_001081375</a>       | <a href="#">72383</a>  | cornifelin                     | <a href="#">Cnfn</a>               | 1.002 | 0.366  | 0.725197 | 0.880835 |
| 8718 | 10516435 | <a href="#">NM_001114399</a>       | <a href="#">67785</a>  | zinc finger, MYM-type 4        | <a href="#">Zmym4</a>              | 1.002 | 0.089  | 0.931375 | 0.972759 |
| 8719 | 10467768 | <a href="#">NM_053083</a>          | <a href="#">67573</a>  | lysyl oxidase-like 4           | <a href="#">Loxl4</a>              | 1.002 | 0.56   | 0.592663 | 0.807299 |
| 8720 | 10527475 | <a href="#">NM_028298</a>          | <a href="#">72611</a>  | zinc finger protein 655        | <a href="#">Zfp655</a>             | 1.002 | -0.351 | 0.735899 | 0.886874 |
| 8721 | 10401309 | <a href="#">BC005675</a>           | <a href="#">66272</a>  | RIKEN cDNA 1810020G14 gene     | <a href="#">1810020G14Rik</a>      | 1.002 | -0.329 | 0.751466 | 0.895256 |
| 8722 | 10511321 | <a href="#">AK034690</a>           | <a href="#">442813</a> | RIKEN cDNA 9430025C20 gene     | <a href="#">9430025C20Rik</a>      | 1.002 | 0.236  | 0.819649 | 0.928312 |
| 8723 | 10544640 | <a href="#">ENSMUST00000101417</a> | <a href="#">101214</a> | transformer 2 alpha homolog (D | <a href="#">Tra2a</a>              | 1.002 | 0.097  | 0.925384 | 0.970455 |
| 8724 | 10544610 | <a href="#">NM_023670</a>          | <a href="#">140488</a> | insulin-like growth factor 2 m | <a href="#">Igf2bp3</a>            | 1.002 | -0.572 | 0.584415 | 0.802186 |
| 8725 | 10542395 | <a href="#">ENSMUST00000066689</a> | <a href="#">54343</a>  | activating transcription facto | <a href="#">Atf7ip</a>             | 1.002 | -0.75  | 0.476821 | 0.727649 |
| 8726 | 10464479 | <a href="#">NM_029456</a>          | <a href="#">52036</a>  | SAPS domain family, member 3   | <a href="#">Saps3</a>              | 1.002 | -0.107 | 0.917746 | 0.967684 |
| 8727 | 10471763 | <a href="#">NM_146939</a>          | <a href="#">258941</a> | olfactory receptor 354         | <a href="#">Olfr354</a>            | 1.002 | 0.495  | 0.635481 | 0.834416 |
| 8728 | 10550100 | <a href="#">NM_134226</a>          | <a href="#">171260</a> | vomeronal 1 receptor, J2       | <a href="#">V1rj2</a>              | 1.001 | 0.266  | 0.797716 | 0.917953 |
| 8729 | 10588855 | <a href="#">NM_008243</a>          | <a href="#">15235</a>  | macrophage stimulating 1 (hepa | <a href="#">Mst1</a>               | 1.001 | 0.02   | 0.984678 | 0.993512 |
| 8730 | 10572398 | <a href="#">NM_018837</a>          | <a href="#">12931</a>  | cytokine receptor-like factor  | <a href="#">Crlf1</a>              | 1.001 | -0.018 | 0.985884 | 0.994073 |
| 8731 | 10466935 | <a href="#">NM_011272</a>          | <a href="#">19773</a>  | relaxin 1                      | <a href="#">Rln1</a>               | 1.001 | 0.344  | 0.740357 | 0.889357 |
| 8732 | 10402579 | <a href="#">NM_181328</a>          | <a href="#">214663</a> | solute carrier family 25 (mito | <a href="#">Slc25a29</a>           | 1.001 | 0.005  | 0.996397 | 0.998711 |
| 8733 | 10529028 | <a href="#">NM_024460</a>          | <a href="#">67695</a>  | RIKEN cDNA 2310016E02 gene     | <a href="#">2310016E02Rik</a>      | 1.001 | -0.533 | 0.610082 | 0.818617 |
| 8734 | 10572838 | <a href="#">NM_009188</a>          | <a href="#">20467</a>  | transcriptional regulator, SIN | <a href="#">Sin3b</a>              | 1.001 | -0.266 | 0.79798  | 0.918148 |
| 8735 | 10572739 | <a href="#">AK032580</a>           | <a href="#">791365</a> | predicted gene, ENSMUSG0000006 | <a href="#">ENSMUSG00000060719</a> | 1.001 | -0.001 | 0.999471 | 0.99966  |
| 8736 | 10458285 | <a href="#">NM_029485</a>          | <a href="#">71242</a>  | RIKEN cDNA 5133400G04 gene     | <a href="#">5133400G04Rik</a>      | 1.001 | -0.108 | 0.916822 | 0.967184 |
| 8737 | 10551600 | <a href="#">NM_177301</a>          | <a href="#">15388</a>  | heterogeneous nuclear ribonucl | <a href="#">Hnmp1</a>              | 1.001 | -0.288 | 0.781301 | 0.911076 |
| 8738 | 10607246 | <a href="#">ENSMUST00000059256</a> | <a href="#">382245</a> | transmembrane protein 29       | <a href="#">Tmem29</a>             | 1.001 | -0.172 | 0.868323 | 0.947244 |
| 8739 | 10499348 | <a href="#">NM_024246</a>          | <a href="#">71913</a>  | transmembrane protein 79       | <a href="#">Tmem79</a>             | 1.001 | 0.264  | 0.798977 | 0.918828 |
| 8740 | 10348119 |                                    |                        |                                |                                    | 1.001 | -0.025 | 0.981105 | 0.99199  |
| 8741 | 10417829 | <a href="#">NM_134081</a>          | <a href="#">108671</a> | DnaJ (Hsp40) homolog, subfamil | <a href="#">Dnajc9</a>             | 1.001 | -0.304 | 0.769423 | 0.904519 |
| 8742 | 10605914 | <a href="#">XR_030913</a>          | <a href="#">436219</a> | similar to Glyceraldehyde-3-ph | <a href="#">LOC436219</a>          | 1.001 | 0.35   | 0.736185 | 0.887097 |
| 8743 | 10598287 |                                    |                        |                                |                                    | 1.001 | 0.23   | 0.824401 | 0.929508 |
| 8744 | 10344633 | <a href="#">NM_011541</a>          | <a href="#">21399</a>  | transcription elongation facto | <a href="#">Tcea1</a>              | 1.001 | -0.3   | 0.77269  | 0.906416 |
| 8745 | 10436596 | <a href="#">ENSMUST00000068704</a> | <a href="#">77994</a>  | RIKEN cDNA 2810055G20 gene     | <a href="#">2810055G20Rik</a>      | 1.001 | -0.025 | 0.981069 | 0.99199  |
| 8746 | 10589940 | <a href="#">NM_148958</a>          | <a href="#">74486</a>  | oxysterol binding protein-like | <a href="#">Osbp10</a>             | 1.001 | 0.171  | 0.868771 | 0.947491 |
| 8747 | 10382254 | <a href="#">ENSMUST00000055404</a> | <a href="#">320509</a> | RIKEN cDNA 9930022D16 gene     | <a href="#">9930022D16Rik</a>      | 1.001 | -0.19  | 0.85433  | 0.94105  |
| 8748 | 10404988 | <a href="#">BC045201</a>           | <a href="#">68128</a>  | RIKEN cDNA C030044B11 gene     | <a href="#">C030044B11Rik</a>      | 1.001 | 0.263  | 0.799875 | 0.919211 |
| 8749 | 10577560 | <a href="#">NM_010546</a>          | <a href="#">16150</a>  | inhibitor of kappaB kinase bet | <a href="#">Ikbkb</a>              | 1.001 | -0.088 | 0.932566 | 0.973153 |
| 8750 | 10394680 | <a href="#">XR_034647</a>          | <a href="#">668492</a> | similar to zinc finger CCHC-ty | <a href="#">LOC668492</a>          | 1.001 | -0.333 | 0.748606 | 0.89361  |
| 8751 | 10437664 | <a href="#">NM_021428</a>          | <a href="#">58239</a>  | dexamethasone-induced transcri | <a href="#">Dexi</a>               | 1.001 | -0.174 | 0.866314 | 0.946535 |
| 8752 | 10479975 |                                    |                        |                                |                                    | 1.001 | -0.107 | 0.917917 | 0.967712 |
| 8753 | 10521205 | <a href="#">NM_011893</a>          | <a href="#">24055</a>  | SH3-domain binding protein 2   | <a href="#">Sh3bp2</a>             | 1.001 | -0.156 | 0.880056 | 0.952396 |
| 8754 | 10574102 |                                    |                        |                                |                                    | 1.001 | -0.045 | 0.965279 | 0.986124 |
| 8755 | 10517948 | <a href="#">NM_019763</a>          | <a href="#">56381</a>  | SPEN homolog, transcriptional  | <a href="#">Spen</a>               | 1.001 | -0.304 | 0.769589 | 0.904613 |
| 8756 | 10564978 | <a href="#">NM_007550</a>          | <a href="#">12144</a>  | Bloom syndrome homolog (human) | <a href="#">Blm</a>                | 1.001 | -0.131 | 0.899197 | 0.960136 |

|      |          |                                    |                           |                                    |                                    |       |        |          |          |
|------|----------|------------------------------------|---------------------------|------------------------------------|------------------------------------|-------|--------|----------|----------|
| 8757 | 10511898 | <a href="#">NM_010289</a>          | <a href="#">14610</a>     | gap junction protein, alpha 10     | <a href="#">Gja10</a>              | 1.001 | 0.39   | 0.708147 | 0.872296 |
| 8758 | 10578619 | <a href="#">NM_172407</a>          | <a href="#">70925</a>     | CDKN2A interacting protein         | <a href="#">Cdkn2aip</a>           | 1.001 | 0.207  | 0.842087 | 0.936059 |
| 8759 | 10382198 |                                    |                           |                                    |                                    | 1.001 | 0.442  | 0.671457 | 0.854195 |
| 8760 | 10462435 | <a href="#">NM_029993</a>          | <a href="#">77836</a>     | melan-A                            | <a href="#">Mlana</a>              | 1.001 | 0.674  | 0.521447 | 0.758794 |
| 8761 | 10514590 | <a href="#">NM_026082</a>          | <a href="#">67299</a>     | dedicator of cytokinesis 7         | <a href="#">Dock7</a>              | 1.001 | -0.065 | 0.949926 | 0.980663 |
| 8762 | 10584071 | <a href="#">NM_001080817</a>       | <a href="#">382066</a>    | PR domain containing 10            | <a href="#">Prdm10</a>             | 1.001 | 0.023  | 0.982583 | 0.992413 |
| 8763 | 10554221 | <a href="#">BC006942</a>           | <a href="#">791275</a>    | predicted gene,<br>ENSMUSG00000005 | <a href="#">ENSMUSG00000052629</a> | 1.001 | 0.22   | 0.832125 | 0.93265  |
| 8764 | 10572290 | <a href="#">NM_001025586</a>       | <a href="#">75692</a>     | nuclear receptor 2C2-associate     | <a href="#">Nr2c2ap</a>            | 1.001 | -0.003 | 0.997587 | 0.999133 |
| 8765 | 10392364 | <a href="#">NM_007582</a>          | <a href="#">12299</a>     | calcium channel, voltage-depen     | <a href="#">Cacng1</a>             | 1.001 | 0.47   | 0.652203 | 0.844159 |
| 8766 | 10382022 | <a href="#">NM_027346</a>          | <a href="#">70207</a>     | coiled-coil domain containing      | <a href="#">Cede44</a>             | 1.001 | -0.926 | 0.384566 | 0.653901 |
| 8767 | 10358896 | <a href="#">ENSMUST00000059036</a> | <a href="#">240816</a>    | regulator of G-protein signali     | <a href="#">Rgs11</a>              | 1.001 | -0.036 | 0.972155 | 0.98815  |
| 8768 | 10428310 | <a href="#">NM_001102458</a>       | <a href="#">54375</a>     | antizyme inhibitor 1               | <a href="#">Azin1</a>              | 1.001 | 0.148  | 0.886201 | 0.955393 |
| 8769 | 10452480 | <a href="#">NM_153519</a>          | <a href="#">213272</a>    | thioredoxin domain containing      | <a href="#">Txndc2</a>             | 1.001 | 0.084  | 0.935403 | 0.974485 |
| 8770 | 10568417 | <a href="#">BC038342</a>           | <a href="#">210711</a>    | RIKEN cDNA 1110007A13<br>gene      | <a href="#">1110007A13Rik</a>      | 1.001 | -0.137 | 0.895117 | 0.958733 |
| 8771 | 10460926 | <a href="#">NM_001110791</a>       | <a href="#">22668</a>     | splicing factor 1                  | <a href="#">Sf1</a>                | 1.001 | -0.019 | 0.985468 | 0.993977 |
| 8772 | 10447551 | <a href="#">NM_027457</a>          | <a href="#">70544</a>     | RIKEN cDNA 5730437N04<br>gene      | <a href="#">5730437N04Rik</a>      | 1.001 | -0.156 | 0.880214 | 0.952468 |
| 8773 | 10579860 | <a href="#">NM_008539</a>          | <a href="#">17125</a>     | MAD homolog 1 (Drosophila)         | <a href="#">Smad1</a>              | 1.001 | -0.382 | 0.713531 | 0.874653 |
| 8774 | 10386388 | <a href="#">BC029025</a>           | <a href="#">67826</a>     | RIKEN cDNA 1110031B06<br>gene      | <a href="#">1110031B06Rik</a>      | 1.001 | -0.683 | 0.515653 | 0.755158 |
| 8775 | 10528686 | <a href="#">NM_153076</a>          | <a href="#">214301</a>    | crystallin, gamma N                | <a href="#">Crygn</a>              | 1.001 | -0.105 | 0.919065 | 0.967837 |
| 8776 | 10438442 | <a href="#">ENSMUST00000100083</a> | <a href="#">68162</a>     | RIKEN cDNA A930003A15<br>gene      | <a href="#">A930003A15Rik</a>      | 1.001 | 0.325  | 0.754504 | 0.896702 |
| 8777 | 10439411 | <a href="#">NM_010936</a>          | <a href="#">18171</a>     | nuclear receptor subfamily 1,      | <a href="#">Nr1i2</a>              | 1.001 | 0.112  | 0.914218 | 0.966149 |
| 8778 | 10379636 | <a href="#">NM_011410</a>          | <a href="#">20558</a>     | schlafen 4                         | <a href="#">Slfn4</a>              | 1.001 | 0.165  | 0.873831 | 0.949742 |
| 8779 | 10429515 | <a href="#">NM_011838</a>          | <a href="#">23936</a>     | Ly6/neurotoxin 1                   | <a href="#">Lynx1</a>              | 1.001 | 0.162  | 0.875915 | 0.95093  |
| 8780 | 10390985 | <a href="#">NM_010665</a>          | <a href="#">16670</a>     | keratin 32                         | <a href="#">Krt32</a>              | 1.001 | -0.459 | 0.659998 | 0.848652 |
| 8781 | 10589934 | <a href="#">ENSMUST00000064735</a> | <a href="#">100038631</a> | predicted gene,<br>ENSMUSG00000005 | <a href="#">ENSMUSG00000052724</a> | 1.001 | 0.166  | 0.872896 | 0.949165 |
| 8782 | 10391143 | <a href="#">NM_172565</a>          | <a href="#">217194</a>    | kelch-like 11 (Drosophila)         | <a href="#">Klhl11</a>             | 1.001 | 0.195  | 0.85058  | 0.939883 |
| 8783 | 10555303 | <a href="#">NM_027629</a>          | <a href="#">70974</a>     | phosphoglucomutase 2-like 1        | <a href="#">Pgm21l</a>             | 1.001 | -0.335 | 0.746895 | 0.892495 |
| 8784 | 10414663 | <a href="#">NM_023879</a>          | <a href="#">77945</a>     | retinitis pigmentosa GTPase re     | <a href="#">Rpgrip1</a>            | 1.001 | 0.106  | 0.918738 | 0.967805 |
| 8785 | 10391750 | <a href="#">ENSMUST00000069673</a> | <a href="#">100038535</a> | predicted gene,<br>ENSMUSG00000007 | <a href="#">ENSMUSG00000075516</a> | 1.001 | -0.299 | 0.773065 | 0.906652 |
| 8786 | 10519207 | <a href="#">AK005805</a>           | <a href="#">100115</a>    | expressed sequence AI428898        | <a href="#">AI428898</a>           | 1.001 | -0.267 | 0.796577 | 0.917464 |
| 8787 | 10381860 | <a href="#">NM_172567</a>          | <a href="#">52686</a>     | methyltransferase like 2           | <a href="#">Mettl2</a>             | 1.001 | -0.299 | 0.773148 | 0.906681 |
| 8788 | 10461454 | <a href="#">BC024923</a>           | <a href="#">69038</a>     | RIKEN cDNA 1810006K21<br>gene      | <a href="#">1810006K21Rik</a>      | 1.001 | 0.146  | 0.887706 | 0.955685 |
| 8789 | 10525343 | <a href="#">NM_010861</a>          | <a href="#">17906</a>     | myosin, light polypeptide 2, r     | <a href="#">My12</a>               | 1.001 | -0.204 | 0.843924 | 0.93664  |
| 8790 | 10505118 |                                    |                           |                                    |                                    | 1.001 | 0.216  | 0.835141 | 0.933323 |
| 8791 | 10522668 | <a href="#">NM_025939</a>          | <a href="#">67054</a>     | phosphoribosylaminoimidazole c     | <a href="#">Paics</a>              | 1.001 | -0.179 | 0.863065 | 0.94533  |
| 8792 | 10404772 | <a href="#">ENSMUST00000099561</a> | <a href="#">100038577</a> | predicted gene,<br>ENSMUSG00000007 | <a href="#">ENSMUSG00000074927</a> | 1.001 | -0.187 | 0.856814 | 0.942193 |
| 8793 | 10586274 | <a href="#">NM_175153</a>          | <a href="#">69882</a>     | RIKEN cDNA 2010321M09<br>gene      | <a href="#">2010321M09Rik</a>      | 1.001 | -0.186 | 0.857203 | 0.942404 |
| 8794 | 10561078 | <a href="#">NM_028771</a>          | <a href="#">52132</a>     | coiled-coil domain containing      | <a href="#">Cede97</a>             | 1.001 | -0.026 | 0.980292 | 0.991919 |
| 8795 | 10510957 | <a href="#">NM_172990</a>          | <a href="#">269614</a>    | pantothenate kinase 4              | <a href="#">Pank4</a>              | 1.001 | -0.088 | 0.932354 | 0.973077 |
| 8796 | 10395974 |                                    |                           |                                    |                                    | 1.001 | 0.594  | 0.570702 | 0.795023 |
| 8797 | 10445664 | <a href="#">NM_146079</a>          | <a href="#">107477</a>    | guanylate cyclase activator 1B     | <a href="#">Gucal1b</a>            | 1     | 0.167  | 0.871897 | 0.948811 |
| 8798 | 10425628 | <a href="#">ENSMUST00000072779</a> | <a href="#">545121</a>    | predicted gene, EG545121           | <a href="#">EG545121</a>           | 1     | -0.05  | 0.961301 | 0.985156 |
| 8799 | 10606009 | <a href="#">ENSMUST00000101358</a> | <a href="#">245536</a>    | gene model 614, (NCBI)             | <a href="#">Gm614</a>              | 1     | 0.157  | 0.879374 | 0.952124 |
| 8800 | 10420470 | <a href="#">XR_004746</a>          | <a href="#">675187</a>    | similar to Glyceraldehyde-3-ph     | <a href="#">LOC675187</a>          | 1     | 0.419  | 0.687522 | 0.862217 |
| 8801 | 10598569 | <a href="#">NM_001038697</a>       | <a href="#">434729</a>    | predicted gene, EG434729           | <a href="#">EG434729</a>           | 1     | 0.489  | 0.639635 | 0.836546 |
| 8802 | 10437080 | <a href="#">NM_009441</a>          | <a href="#">22129</a>     | tetratricopeptide repeat domai     | <a href="#">Ttc3</a>               | 1     | -0.283 | 0.785287 | 0.912507 |
| 8803 | 10369989 | <a href="#">NM_010027</a>          | <a href="#">13202</a>     | D-dopachrome tautomerase           | <a href="#">Ddt</a>                | 1     | -0.392 | 0.706111 | 0.871814 |
| 8804 | 10480238 | <a href="#">NM_145838</a>          | <a href="#">241230</a>    | ST8 alpha-N-acetyl-neuraminide     | <a href="#">St8sia6</a>            | 1     | 0.201  | 0.8461   | 0.937284 |
| 8805 | 10384725 | <a href="#">NM_009044</a>          | <a href="#">19696</a>     | reticuloendotheliosis oncogene     | <a href="#">Rel</a>                | 1     | -0.229 | 0.825138 | 0.929627 |

|      |          |                                    |                           |                                |                                    |   |        |          |          |
|------|----------|------------------------------------|---------------------------|--------------------------------|------------------------------------|---|--------|----------|----------|
| 8806 | 10495613 | <a href="#">NM_029425</a>          | <a href="#">75769</a>     | RIKEN cDNA 4833424O15 gene     | <a href="#">4833424O15Rik</a>      | 1 | 0.051  | 0.960674 | 0.985069 |
| 8807 | 10355742 | <a href="#">NM_023732</a>          | <a href="#">74104</a>     | ATP-binding cassette, sub-fami | <a href="#">Abcb6</a>              | 1 | -0.259 | 0.802663 | 0.919965 |
| 8808 | 10573472 | <a href="#">NM_144929</a>          | <a href="#">234542</a>    | retbindin                      | <a href="#">Rtbdn</a>              | 1 | 0.048  | 0.963097 | 0.985611 |
| 8809 | 10352192 |                                    |                           |                                |                                    | 1 | -0.251 | 0.808637 | 0.922966 |
| 8810 | 10481634 | <a href="#">NM_146118</a>          | <a href="#">227731</a>    | solute carrier family 25 (mito | <a href="#">Slc25a25</a>           | 1 | 0.195  | 0.850864 | 0.94008  |
| 8811 | 10437846 | <a href="#">NM_028968</a>          | <a href="#">74482</a>     | interferon induced transmembra | <a href="#">Ifitm7</a>             | 1 | 0.38   | 0.715182 | 0.875355 |
| 8812 | 10447431 | <a href="#">NM_180974</a>          | <a href="#">14236</a>     | forkhead box N2                | <a href="#">Foxn2</a>              | 1 | -0.162 | 0.875442 | 0.950704 |
| 8813 | 10488687 | <a href="#">NM_178939</a>          | <a href="#">68559</a>     | p53 and DNA damage regulated 1 | <a href="#">Pdrp1</a>              | 1 | -0.325 | 0.754143 | 0.896425 |
| 8814 | 10549875 | <a href="#">NM_146389</a>          | <a href="#">258384</a>    | olfactory receptor 1350        | <a href="#">Olf1350</a>            | 1 | -0.294 | 0.777026 | 0.909262 |
| 8815 | 10353849 | <a href="#">BC132293</a>           | <a href="#">226976</a>    | RIKEN cDNA 4632411B12 gene     | <a href="#">4632411B12Rik</a>      | 1 | -0.294 | 0.777169 | 0.909278 |
| 8816 | 10449510 | <a href="#">BC117930</a>           | <a href="#">207819</a>    | RIKEN cDNA 4930539E08 gene     | <a href="#">4930539E08Rik</a>      | 1 | 0.466  | 0.654756 | 0.845294 |
| 8817 | 10432756 | <a href="#">NM_001003670</a>       | <a href="#">406223</a>    | predicted gene, EG406223       | <a href="#">EG406223</a>           | 1 | -0.057 | 0.956226 | 0.983332 |
| 8818 | 10348424 | <a href="#">NM_133816</a>          | <a href="#">98402</a>     | SH3-domain binding protein 4   | <a href="#">Sh3bp4</a>             | 1 | 0.054  | 0.958775 | 0.984381 |
| 8819 | 10545921 | <a href="#">NM_010751</a>          | <a href="#">17119</a>     | MAX dimerization protein 1     | <a href="#">Mxd1</a>               | 1 | -0.379 | 0.715817 | 0.875402 |
| 8820 | 10431030 | <a href="#">NM_001030014</a>       | <a href="#">223722</a>    | malonyl CoA:ACP acyltransferas | <a href="#">Mcat</a>               | 1 | -0.131 | 0.899494 | 0.960245 |
| 8821 | 10421309 | <a href="#">NM_144808</a>          | <a href="#">213053</a>    | solute carrier family 39 (zinc | <a href="#">Slc39a14</a>           | 1 | -0.111 | 0.914388 | 0.966207 |
| 8822 | 10582006 | <a href="#">XM_001480002</a>       | <a href="#">100043053</a> | hypothetical protein LOC100043 | <a href="#">LOC100043053</a>       | 1 | -0.155 | 0.880758 | 0.952675 |
| 8823 | 10547858 | <a href="#">NM_013530</a>          | <a href="#">14695</a>     | guanine nucleotide binding pro | <a href="#">Gnb3</a>               | 1 | -0.158 | 0.879065 | 0.952124 |
| 8824 | 10535413 |                                    |                           |                                |                                    | 1 | -0.022 | 0.983393 | 0.992843 |
| 8825 | 10348600 | <a href="#">NM_028718</a>          | <a href="#">74019</a>     | TNF receptor-associated factor | <a href="#">Traf3ip1</a>           | 1 | 0.153  | 0.882567 | 0.953648 |
| 8826 | 10425302 | <a href="#">NM_013818</a>          | <a href="#">14904</a>     | GTP binding protein 1          | <a href="#">Gtpbp1</a>             | 1 | -0.335 | 0.746911 | 0.892495 |
| 8827 | 10397627 |                                    |                           |                                |                                    | 1 | 0.314  | 0.762282 | 0.901088 |
| 8828 | 10426240 | <a href="#">ENSMUST00000116193</a> | <a href="#">546648</a>    | kelch domain containing 7B     | <a href="#">Klhdc7b</a>            | 1 | 0.198  | 0.848771 | 0.938719 |
| 8829 | 10509645 | <a href="#">NM_146157</a>          | <a href="#">230866</a>    | RIKEN cDNA C230096C10 gene     | <a href="#">C230096C10Rik</a>      | 1 | -0.166 | 0.872402 | 0.949019 |
| 8830 | 10445877 | <a href="#">ENSMUST00000105022</a> | <a href="#">628926</a>    | predicted gene, ENSMUSG0000005 | <a href="#">ENSMUSG00000058380</a> | 1 | 0.09   | 0.931079 | 0.972759 |
| 8831 | 10360297 | <a href="#">NM_008429</a>          | <a href="#">16524</a>     | potassium inwardly-rectifying  | <a href="#">Kcnj9</a>              | 1 | 0.067  | 0.948746 | 0.980224 |
| 8832 | 10534842 | <a href="#">NM_010312</a>          | <a href="#">14693</a>     | guanine nucleotide binding pro | <a href="#">Gnb2</a>               | 1 | 0.059  | 0.954737 | 0.982671 |
| 8833 | 10460194 |                                    |                           |                                |                                    | 1 | 0.002  | 0.998655 | 0.999521 |
| 8834 | 10511896 | <a href="#">AK144923</a>           | <a href="#">414068</a>    | cDNA sequence BC024582         | <a href="#">BC024582</a>           | 1 | 0.235  | 0.82099  | 0.92863  |
| 8835 | 10544284 | <a href="#">NM_001001451</a>       | <a href="#">387513</a>    | taste receptor, type 2, member | <a href="#">Tas2r138</a>           | 1 | 0.62   | 0.554642 | 0.783704 |
| 8836 | 10560856 | <a href="#">NM_199013</a>          | <a href="#">210145</a>    | immunity-related GTPase family | <a href="#">Irgc1</a>              | 1 | 0.164  | 0.87458  | 0.949978 |
| 8837 | 10355264 | <a href="#">ENSMUST00000076473</a> | <a href="#">100043192</a> | similar to ribosomal protein L | <a href="#">LOC100043192</a>       | 1 | -0.437 | 0.674969 | 0.855557 |
| 8838 | 10376765 | <a href="#">NM_007436</a>          | <a href="#">11670</a>     | aldehyde dehydrogenase family  | <a href="#">Aldh3a1</a>            | 1 | -0.217 | 0.834334 | 0.933071 |
| 8839 | 10499927 | <a href="#">NM_026394</a>          | <a href="#">67828</a>     | late cornified envelope 1F     | <a href="#">Lcel1f</a>             | 1 | 0.464  | 0.656255 | 0.846043 |
| 8840 | 10465150 | <a href="#">NM_144868</a>          | <a href="#">104401</a>    | pecanex-like 3 (Drosophila)    | <a href="#">Pcnx13</a>             | 1 | -0.104 | 0.919756 | 0.967952 |
| 8841 | 10512063 |                                    |                           |                                |                                    | 1 | 0.12   | 0.907603 | 0.963723 |
| 8842 | 10391798 | <a href="#">NM_010277</a>          | <a href="#">14580</a>     | glial fibrillary acidic protei | <a href="#">Gfap</a>               | 1 | 0.413  | 0.69185  | 0.864682 |
| 8843 | 10351400 | <a href="#">BC132161</a>           | <a href="#">226610</a>    | RIKEN cDNA C030014K22 gene     | <a href="#">C030014K22Rik</a>      | 1 | -0.154 | 0.882186 | 0.953469 |
| 8844 | 10515649 | <a href="#">BC059842</a>           | <a href="#">230676</a>    | cDNA sequence BC059842         | <a href="#">BC059842</a>           | 1 | 0.397  | 0.702726 | 0.869626 |
| 8845 | 10491958 | <a href="#">ENSMUST00000099104</a> | <a href="#">100038447</a> | predicted gene, ENSMUSG0000007 | <a href="#">ENSMUSG00000074603</a> | 1 | 0.184  | 0.859209 | 0.943452 |
| 8846 | 10442458 | <a href="#">NM_175682</a>          | <a href="#">319259</a>    | RIKEN cDNA 9930021D14 gene     | <a href="#">9930021D14Rik</a>      | 1 | 0.259  | 0.803202 | 0.920074 |
| 8847 | 10529093 | <a href="#">NM_027901</a>          | <a href="#">71752</a>     | general transcription factor I | <a href="#">Gtf3c2</a>             | 1 | -0.226 | 0.827789 | 0.93066  |
| 8848 | 10440388 | <a href="#">NM_030201</a>          | <a href="#">110920</a>    | stress 70 protein chaperone, m | <a href="#">Stch</a>               | 1 | -0.638 | 0.543304 | 0.775718 |
| 8849 | 10552264 |                                    |                           |                                |                                    | 1 | 0.064  | 0.950892 | 0.981077 |
| 8850 | 10401420 |                                    |                           |                                |                                    | 1 | 0.252  | 0.808011 | 0.922738 |
| 8851 | 10361075 | <a href="#">NM_001081259</a>       | <a href="#">226844</a>    | feline leukemia virus subgroup | <a href="#">Flvcr1</a>             | 1 | -0.191 | 0.853472 | 0.940713 |
| 8852 | 10474725 | <a href="#">NM_013719</a>          | <a href="#">27103</a>     | eukaryotic translation initiat | <a href="#">Eif2ak4</a>            | 1 | -0.065 | 0.949721 | 0.980608 |
| 8853 | 10548616 |                                    |                           |                                |                                    | 1 | -0.002 | 0.998294 | 0.999428 |
| 8854 | 10418868 |                                    |                           |                                |                                    | 1 | 0.421  | 0.685765 | 0.861188 |
| 8855 | 10415890 | <a href="#">NM_146246</a>          | <a href="#">271209</a>    | retinitis pigmentosa 1 homolog | <a href="#">Rp111</a>              | 1 | 0.184  | 0.858763 | 0.943374 |

|      |          |                                    |                           |                                |                                    |       |        |          |          |
|------|----------|------------------------------------|---------------------------|--------------------------------|------------------------------------|-------|--------|----------|----------|
| 8856 | 10377652 | <a href="#">NM_019726</a>          | <a href="#">56310</a>     | G protein pathway suppressor 2 | <a href="#">Gps2</a>               | 1     | -0.147 | 0.887035 | 0.955613 |
| 8857 | 10411508 | <a href="#">NM_026873</a>          | <a href="#">68927</a>     | pentatricopeptide repeat domai | <a href="#">Pted2</a>              | 1     | -0.38  | 0.714677 | 0.875137 |
| 8858 | 10468089 | <a href="#">NM_023799</a>          | <a href="#">76055</a>     | meningioma expressed antigen 5 | <a href="#">Mgea5</a>              | 1     | -0.026 | 0.980144 | 0.991919 |
| 8859 | 10365069 | <a href="#">NM_008844</a>          | <a href="#">18717</a>     | phosphatidylinositol-4-phospha | <a href="#">Pip5k1c</a>            | 1     | 0.182  | 0.860688 | 0.943954 |
| 8860 | 10364550 | <a href="#">NM_053244</a>          | <a href="#">114229</a>    | KISS1 receptor                 | <a href="#">Kiss1r</a>             | 1     | 0.001  | 0.999028 | 0.999589 |
| 8861 | 10403834 | <a href="#">NM_016687</a>          | <a href="#">20379</a>     | secreted frizzled-related prot | <a href="#">Sfrp4</a>              | 1     | 0.209  | 0.839859 | 0.935328 |
| 8862 | 10510872 |                                    |                           |                                |                                    | 1     | 0.545  | 0.602278 | 0.81371  |
| 8863 | 10430132 | <a href="#">NM_172817</a>          | <a href="#">239546</a>    | zinc finger protein 647        | <a href="#">Zfp647</a>             | 0.999 | -0.402 | 0.699052 | 0.868099 |
| 8864 | 10411052 | <a href="#">ENSMUST00000040106</a> | <a href="#">73942</a>     | RIKEN cDNA 4930405M20 gene     | <a href="#">4930405M20Rik</a>      | 0.999 | 0.139  | 0.893553 | 0.957981 |
| 8865 | 10504609 |                                    |                           |                                |                                    | 0.999 | -0.19  | 0.854347 | 0.94105  |
| 8866 | 10587637 | <a href="#">AK141776</a>           | <a href="#">100038531</a> | predicted gene, ENSMUSG0000007 | <a href="#">ENSMUSG00000074152</a> | 0.999 | -0.043 | 0.966932 | 0.986963 |
| 8867 | 10557481 | <a href="#">NM_026875</a>          | <a href="#">66090</a>     | yippee-like 3 (Drosophila)     | <a href="#">Ypel3</a>              | 0.999 | -0.449 | 0.666571 | 0.851355 |
| 8868 | 10469145 | <a href="#">NM_025280</a>          | <a href="#">16588</a>     | antigenic determinant of rec-A | <a href="#">Kin</a>                | 0.999 | -0.673 | 0.522063 | 0.759078 |
| 8869 | 10382927 | <a href="#">ENSMUST00000092394</a> | <a href="#">432615</a>    | predicted gene, OTTMUSG0000000 | <a href="#">OTTMUSG00000003802</a> | 0.999 | 0.29   | 0.780287 | 0.910803 |
| 8870 | 10511226 | <a href="#">NM_207223</a>          | <a href="#">140500</a>    | centaurin, beta 5              | <a href="#">Centb5</a>             | 0.999 | 0.036  | 0.971876 | 0.988148 |
| 8871 | 10607111 | <a href="#">XM_142195</a>          | <a href="#">245651</a>    | predicted gene, EG245651       | <a href="#">EG245651</a>           | 0.999 | 0.196  | 0.849992 | 0.939578 |
| 8872 | 10544171 | <a href="#">NM_028123</a>          | <a href="#">72144</a>     | solute carrier family 37 (glyc | <a href="#">Slc37a3</a>            | 0.999 | -0.382 | 0.713598 | 0.874653 |
| 8873 | 10538123 | <a href="#">NM_174960</a>          | <a href="#">317758</a>    | GTPase, IMAP family member 9   | <a href="#">Gimap9</a>             | 0.999 | -0.457 | 0.661306 | 0.849184 |
| 8874 | 10393177 | <a href="#">NM_015729</a>          | <a href="#">11430</a>     | acyl-Coenzyme A oxidase 1, pal | <a href="#">Acox1</a>              | 0.999 | -0.64  | 0.542233 | 0.77466  |
| 8875 | 10575550 | <a href="#">NM_146217</a>          | <a href="#">234734</a>    | alanyl-tRNA synthetase         | <a href="#">Aars</a>               | 0.999 | -0.34  | 0.743844 | 0.89106  |
| 8876 | 10386955 | <a href="#">NM_178379</a>          | <a href="#">70383</a>     | COX10 homolog, cytochrome c ox | <a href="#">Cox10</a>              | 0.999 | 0.078  | 0.939853 | 0.976619 |
| 8877 | 10592154 | <a href="#">BC035953</a>           | <a href="#">76832</a>     | hydrolethalus syndrome 1       | <a href="#">Hyls1</a>              | 0.999 | -0.036 | 0.972309 | 0.98815  |
| 8878 | 10440849 | <a href="#">ENSMUST00000023696</a> | <a href="#">104015</a>    | synaptojanin 1                 | <a href="#">Synj1</a>              | 0.999 | 0.128  | 0.901465 | 0.961344 |
| 8879 | 10378816 | <a href="#">NM_010484</a>          | <a href="#">15567</a>     | solute carrier family 6 (neuro | <a href="#">Slc6a4</a>             | 0.999 | -0.465 | 0.655315 | 0.845667 |
| 8880 | 10370180 | <a href="#">NM_146007</a>          | <a href="#">12834</a>     | collagen, type VI, alpha 2     | <a href="#">Col6a2</a>             | 0.999 | 0.227  | 0.826971 | 0.930622 |
| 8881 | 10579663 | <a href="#">NM_007944</a>          | <a href="#">13859</a>     | epidermal growth factor recept | <a href="#">Eps15l1</a>            | 0.999 | -0.419 | 0.687346 | 0.862149 |
| 8882 | 10557213 | <a href="#">NM_011247</a>          | <a href="#">19647</a>     | retinoblastoma binding protein | <a href="#">Rbbp6</a>              | 0.999 | -0.065 | 0.949836 | 0.980663 |
| 8883 | 10567702 | <a href="#">NM_144529</a>          | <a href="#">70497</a>     | Rho GTPase activating protein  | <a href="#">Arhgap17</a>           | 0.999 | -0.249 | 0.810075 | 0.923405 |
| 8884 | 10578377 | <a href="#">NM_013522</a>          | <a href="#">14300</a>     | FSHD region gene 1             | <a href="#">Frg1</a>               | 0.999 | -0.191 | 0.854153 | 0.941009 |
| 8885 | 10549827 | <a href="#">NM_133204</a>          | <a href="#">170734</a>    | zinc finger protein 371        | <a href="#">Zfp371</a>             | 0.999 | 0.274  | 0.791587 | 0.915198 |
| 8886 | 10582082 | <a href="#">NM_001009950</a>       | <a href="#">234788</a>    | solute carrier family 38, memb | <a href="#">Slc38a8</a>            | 0.999 | -0.04  | 0.968857 | 0.987519 |
| 8887 | 10429064 | <a href="#">ENSMUST00000100584</a> | <a href="#">654498</a>    | HERV-H LTR-associating 1       | <a href="#">Hhla1</a>              | 0.999 | 0.456  | 0.661836 | 0.8494   |
| 8888 | 10427877 | <a href="#">AK157781</a>           | <a href="#">100038530</a> | predicted gene, ENSMUSG0000007 | <a href="#">ENSMUSG00000072643</a> | 0.999 | -0.065 | 0.950144 | 0.98071  |
| 8889 | 10530223 |                                    |                           |                                |                                    | 0.999 | 0.024  | 0.98187  | 0.992194 |
| 8890 | 10539773 | <a href="#">NM_013528</a>          | <a href="#">14583</a>     | glutamine fructose-6-phosphate | <a href="#">Gfpt1</a>              | 0.999 | -0.408 | 0.695225 | 0.866195 |
| 8891 | 10367154 | <a href="#">NM_001033264</a>       | <a href="#">216456</a>    | glutaminase 2 (liver, mitochon | <a href="#">Gls2</a>               | 0.999 | 0.495  | 0.635275 | 0.834289 |
| 8892 | 10572861 | <a href="#">NM_007975</a>          | <a href="#">14065</a>     | coagulation factor II (thrombi | <a href="#">F2rl3</a>              | 0.999 | -0.049 | 0.96234  | 0.985405 |
| 8893 | 10515280 |                                    |                           |                                |                                    | 0.999 | 0.594  | 0.570606 | 0.795023 |
| 8894 | 10371286 |                                    |                           |                                |                                    | 0.999 | -0.153 | 0.882525 | 0.953648 |
| 8895 | 10447337 | <a href="#">ENSMUST00000042172</a> | <a href="#">78469</a>     | RIKEN cDNA 1700090G07 gene     | <a href="#">1700090G07Rik</a>      | 0.999 | 0.108  | 0.916651 | 0.967052 |
| 8896 | 10525210 | <a href="#">ENSMUST00000055859</a> | <a href="#">269700</a>    | expressed sequence AU042671    | <a href="#">AU042671</a>           | 0.999 | -0.038 | 0.970817 | 0.988148 |
| 8897 | 10595604 | <a href="#">NM_019796</a>          | <a href="#">56403</a>     | synaptotagmin binding, cytopla | <a href="#">Syncrip</a>            | 0.999 | 0.005  | 0.996503 | 0.998723 |
| 8898 | 10389087 | <a href="#">NM_001007465</a>       | <a href="#">67338</a>     | ring finger and FYVE like doma | <a href="#">Rffl</a>               | 0.999 | 0.132  | 0.898455 | 0.960023 |
| 8899 | 10517566 |                                    |                           |                                |                                    | 0.999 | -0.069 | 0.94682  | 0.978856 |
| 8900 | 10425601 | <a href="#">NM_017376</a>          | <a href="#">21685</a>     | thyrotroph embryonic factor    | <a href="#">Tef</a>                | 0.999 | 0.233  | 0.822303 | 0.92893  |
| 8901 | 10410576 | <a href="#">NM_028959</a>          | <a href="#">74470</a>     | centrosomal protein 72         | <a href="#">Cep72</a>              | 0.999 | -0.467 | 0.654078 | 0.845086 |
| 8902 | 10473650 | <a href="#">NM_021512</a>          | <a href="#">59015</a>     | nucleoporin 160                | <a href="#">Nup160</a>             | 0.999 | -0.373 | 0.71954  | 0.877846 |
| 8903 | 10367413 | <a href="#">NM_028873</a>          | <a href="#">74330</a>     | DnaJ (Hsp40) homolog, subfamil | <a href="#">Dnajc14</a>            | 0.999 | -0.494 | 0.635928 | 0.834683 |
| 8904 | 10434998 | <a href="#">NM_026554</a>          | <a href="#">68092</a>     | nuclear cap binding protein su | <a href="#">Ncbp2</a>              | 0.999 | -0.288 | 0.78118  | 0.911067 |
| 8905 | 10551716 | <a href="#">NM_182694</a>          | <a href="#">243897</a>    | gametogenetin                  | <a href="#">Ggn</a>                | 0.999 | 0.351  | 0.735806 | 0.886874 |
| 8906 | 10450514 | <a href="#">NM_010909</a>          | <a href="#">18038</a>     | nuclear factor of kappa light  | <a href="#">Nfkbil1</a>            | 0.999 | 0.094  | 0.927514 | 0.971484 |
| 8907 | 10600547 | <a href="#">NM_020601</a>          | <a href="#">21372</a>     | transducin (beta)-like 1 X-lin | <a href="#">Tbl1x</a>              | 0.999 | -0.388 | 0.708974 | 0.87266  |

|      |          |                                    |                           |                                  |                                    |       |        |          |          |
|------|----------|------------------------------------|---------------------------|----------------------------------|------------------------------------|-------|--------|----------|----------|
| 8908 | 10577356 |                                    |                           |                                  |                                    | 0.999 | -0.147 | 0.887129 | 0.955613 |
| 8909 | 10506500 | <a href="#">ENSMUST00000094933</a> | <a href="#">329908</a>    | ubiquitin specific peptidase 2   | <a href="#">Usp24</a>              | 0.999 | -0.135 | 0.896494 | 0.959489 |
| 8910 | 10356403 | <a href="#">NM_001110227</a>       | <a href="#">100040591</a> | potassium inwardly-rectifying    | <a href="#">Kcnj13</a>             | 0.999 | 0.335  | 0.747014 | 0.892497 |
| 8911 | 10468016 | <a href="#">NM_026061</a>          | <a href="#">67264</a>     | NADH dehydrogenase (ubiquinone)  | <a href="#">Ndufb8</a>             | 0.999 | -0.358 | 0.730697 | 0.883556 |
| 8912 | 10451322 | <a href="#">NM_001081335</a>       | <a href="#">78309</a>     | p53-associated parkin-like cyt   | <a href="#">Parc</a>               | 0.999 | 0.122  | 0.906603 | 0.963405 |
| 8913 | 10525923 | <a href="#">XM_915709</a>          | <a href="#">208151</a>    | transmembrane protein 132B       | <a href="#">Tmem132b</a>           | 0.999 | -0.025 | 0.980731 | 0.991919 |
| 8914 | 10405189 |                                    |                           |                                  |                                    | 0.999 | -0.665 | 0.526778 | 0.76278  |
| 8915 | 10435676 | <a href="#">NM_019827</a>          | <a href="#">56637</a>     | glycogen synthase kinase 3 bet   | <a href="#">Gsk3b</a>              | 0.999 | -0.326 | 0.753649 | 0.896241 |
| 8916 | 10458538 | <a href="#">BC002117</a>           | <a href="#">66839</a>     | RIKEN cDNA 0610009O20 gene       | <a href="#">0610009O20Rik</a>      | 0.999 | 0.053  | 0.959103 | 0.98454  |
| 8917 | 10345411 | <a href="#">NM_183019</a>          | <a href="#">226970</a>    | Rho guanine nucleotide exchang   | <a href="#">Arhgef4</a>            | 0.999 | -0.121 | 0.906698 | 0.963405 |
| 8918 | 10441344 | <a href="#">BC075621</a>           | <a href="#">106583</a>    | RNA binding motif protein 16     | <a href="#">Rbm16</a>              | 0.999 | -0.261 | 0.801078 | 0.919467 |
| 8919 | 10383810 | <a href="#">ENSMUST00000042344</a> | <a href="#">75342</a>     | RIKEN cDNA 4930556J24 gene       | <a href="#">4930556J24Rik</a>      | 0.999 | 0.063  | 0.951144 | 0.981129 |
| 8920 | 10468174 | <a href="#">NM_008852</a>          | <a href="#">18742</a>     | paired-like homeodomain transc   | <a href="#">Pitx3</a>              | 0.999 | 0.309  | 0.765923 | 0.902563 |
| 8921 | 10583133 | <a href="#">NM_010810</a>          | <a href="#">17393</a>     | matrix metallopeptidase 7        | <a href="#">Mmp7</a>               | 0.999 | 0.073  | 0.943611 | 0.977948 |
| 8922 | 10520080 | <a href="#">NM_177323</a>          | <a href="#">72772</a>     | RAD50 interactor 1               | <a href="#">Rint1</a>              | 0.999 | -0.008 | 0.993915 | 0.997702 |
| 8923 | 10478381 | <a href="#">ENSMUST00000065731</a> | <a href="#">69517</a>     | RIKEN cDNA 2310001K24 gene       | <a href="#">2310001K24Rik</a>      | 0.999 | 0.174  | 0.866481 | 0.946668 |
| 8924 | 10560459 | <a href="#">NM_009499</a>          | <a href="#">22323</a>     | vasodilator-stimulated phospho   | <a href="#">Vasp</a>               | 0.999 | 0.408  | 0.695    | 0.866071 |
| 8925 | 10578157 | <a href="#">NM_175091</a>          | <a href="#">21951</a>     | tankyrase, TRF1-interacting an   | <a href="#">Tnks</a>               | 0.999 | -0.429 | 0.680581 | 0.85838  |
| 8926 | 10524631 | <a href="#">NM_145209</a>          | <a href="#">231655</a>    | 2'-5' oligoadenylate synthetas   | <a href="#">Oasl1</a>              | 0.999 | -0.104 | 0.919701 | 0.967952 |
| 8927 | 10375487 | <a href="#">NM_008143</a>          | <a href="#">14694</a>     | guanine nucleotide binding pro   | <a href="#">Gnb2l1</a>             | 0.999 | -0.47  | 0.652112 | 0.844145 |
| 8928 | 10379557 | <a href="#">ENSMUST00000092851</a> | <a href="#">791422</a>    | predicted gene, OTTMUSG000000000 | <a href="#">OTTMUSG00000000913</a> | 0.999 | 0.017  | 0.986852 | 0.994566 |
| 8929 | 10439021 | <a href="#">NM_177103</a>          | <a href="#">320213</a>    | SUMO/sentrin specific peptidas   | <a href="#">Snp5</a>               | 0.999 | -0.546 | 0.601701 | 0.813257 |
| 8930 | 10414325 | <a href="#">NM_026832</a>          | <a href="#">68755</a>     | cell growth regulator with rin   | <a href="#">Cgrrf1</a>             | 0.999 | 0.019  | 0.98544  | 0.993977 |
| 8931 | 10468229 |                                    |                           |                                  |                                    | 0.999 | 0.134  | 0.897233 | 0.95959  |
| 8932 | 10526880 | <a href="#">ENSMUST00000100518</a> | <a href="#">70744</a>     | RIKEN cDNA 6330403L08 gene       | <a href="#">6330403L08Rik</a>      | 0.999 | 0.181  | 0.861705 | 0.94442  |
| 8933 | 10532346 | <a href="#">NM_153400</a>          | <a href="#">231602</a>    | purinergic receptor P2X, ligand  | <a href="#">P2rx2</a>              | 0.999 | 0.069  | 0.94676  | 0.978842 |
| 8934 | 10354414 |                                    |                           |                                  |                                    | 0.999 | 0.284  | 0.784078 | 0.912068 |
| 8935 | 10599205 | <a href="#">XR_032644</a>          | <a href="#">621983</a>    | similar to Ribosomal protein L   | <a href="#">LOC621983</a>          | 0.999 | -0.286 | 0.782651 | 0.911672 |
| 8936 | 10350646 | <a href="#">NM_001039644</a>       | <a href="#">66967</a>     | ER degradation enhancer, manno   | <a href="#">Edem3</a>              | 0.999 | -0.543 | 0.603701 | 0.814811 |
| 8937 | 10580486 | <a href="#">NM_012047</a>          | <a href="#">26992</a>     | bromodomain containing 7         | <a href="#">Brd7</a>               | 0.999 | -0.27  | 0.79443  | 0.916541 |
| 8938 | 10446713 |                                    |                           |                                  |                                    | 0.999 | -0.206 | 0.842844 | 0.936326 |
| 8939 | 10601880 | <a href="#">NM_001033001</a>       | <a href="#">436230</a>    | cDNA sequence BC065397           | <a href="#">BC065397</a>           | 0.999 | -0.182 | 0.860605 | 0.943954 |
| 8940 | 10507433 | <a href="#">NM_008958</a>          | <a href="#">19207</a>     | patched homolog 2                | <a href="#">Ptch2</a>              | 0.999 | 0.037  | 0.971734 | 0.988148 |
| 8941 | 10511719 |                                    |                           |                                  |                                    | 0.999 | 0.241  | 0.815897 | 0.926256 |
| 8942 | 10440673 | <a href="#">NM_013707</a>          | <a href="#">23927</a>     | keratin associated protein 14    | <a href="#">Krtap14</a>            | 0.999 | -0.036 | 0.972502 | 0.988158 |
| 8943 | 10607557 |                                    |                           |                                  |                                    | 0.999 | 0.096  | 0.926165 | 0.970758 |
| 8944 | 10485342 | <a href="#">NM_183106</a>          | <a href="#">74569</a>     | tetratricopeptide repeat domai   | <a href="#">Ttc17</a>              | 0.999 | -0.335 | 0.747124 | 0.892497 |
| 8945 | 10405576 | <a href="#">NM_178674</a>          | <a href="#">213311</a>    | F-box and leucine-rich repeat    | <a href="#">Fbxl21</a>             | 0.999 | 0.073  | 0.943934 | 0.977948 |
| 8946 | 10391612 | <a href="#">NM_001098836</a>       | <a href="#">217218</a>    | ataxin 7-like 3                  | <a href="#">Atxn7l3</a>            | 0.998 | -0.281 | 0.786707 | 0.91293  |
| 8947 | 10391540 | <a href="#">NM_016695</a>          | <a href="#">50997</a>     | membrane protein, palmitoylate   | <a href="#">Mpp2</a>               | 0.998 | -0.198 | 0.848238 | 0.938472 |
| 8948 | 10376332 | <a href="#">ENSMUST00000108834</a> | <a href="#">73988</a>     | RIKEN cDNA 4930438A08 gene       | <a href="#">4930438A08Rik</a>      | 0.998 | 0.314  | 0.762663 | 0.901202 |
| 8949 | 10598292 | <a href="#">NM_054039</a>          | <a href="#">20371</a>     | forkhead box P3                  | <a href="#">Foxp3</a>              | 0.998 | 0.364  | 0.726521 | 0.881528 |
| 8950 | 10539810 | <a href="#">NM_021418</a>          | <a href="#">58229</a>     | hypothetical protein, MNCb-477   | <a href="#">AB041550</a>           | 0.998 | 0.491  | 0.638112 | 0.835923 |
| 8951 | 10497765 | <a href="#">NM_033623</a>          | <a href="#">114893</a>    | DCUN1D1 DCN1, defective in cul   | <a href="#">Dcun1d1</a>            | 0.998 | -0.106 | 0.918697 | 0.967805 |
| 8952 | 10586184 | <a href="#">NM_025372</a>          | <a href="#">66131</a>     | timeless interacting protein     | <a href="#">Tipin</a>              | 0.998 | -0.633 | 0.546086 | 0.777643 |
| 8953 | 10479639 | <a href="#">NM_016775</a>          | <a href="#">13002</a>     | DnaJ (Hsp40) homolog, subfamil   | <a href="#">Dnajc5</a>             | 0.998 | -0.131 | 0.899664 | 0.960245 |
| 8954 | 10589870 |                                    |                           |                                  |                                    | 0.998 | 0.648  | 0.537249 | 0.770298 |
| 8955 | 10393687 | <a href="#">NM_009734</a>          | <a href="#">12009</a>     | 5-azacytidine induced gene 1     | <a href="#">Azi1</a>               | 0.998 | 0.173  | 0.867219 | 0.946934 |
| 8956 | 10415293 | <a href="#">NM_194346</a>          | <a href="#">268749</a>    | ring finger protein 31           | <a href="#">Rnf31</a>              | 0.998 | -0.1   | 0.92291  | 0.969148 |
| 8957 | 10512791 | <a href="#">NM_198664</a>          | <a href="#">381605</a>    | TBC1 domain family, member 2     | <a href="#">Tbc1d2</a>             | 0.998 | 0.13   | 0.899902 | 0.960355 |
| 8958 | 10454674 | <a href="#">NM_025527</a>          | <a href="#">66384</a>     | signal recognition particle 19   | <a href="#">Srp19</a>              | 0.998 | -0.25  | 0.809632 | 0.923191 |
| 8959 | 10420295 | <a href="#">NM_010374</a>          | <a href="#">14943</a>     | granzyme F                       | <a href="#">Gzmf</a>               | 0.998 | 0.596  | 0.56941  | 0.794081 |

|      |          |                                    |                           |                                |                                    |       |          |          |          |
|------|----------|------------------------------------|---------------------------|--------------------------------|------------------------------------|-------|----------|----------|----------|
| 8960 | 10465059 | <a href="#">NM_009985</a>          | <a href="#">13041</a>     | cathepsin W                    | <a href="#">Ctsw</a>               | 0.998 | 0.097    | 0.92504  | 0.970374 |
| 8961 | 10425341 | <a href="#">NM_025609</a>          | <a href="#">66513</a>     | mitogen-activated protein kina | <a href="#">Map3k7ip1</a>          | 0.998 | 0.182    | 0.860658 | 0.943954 |
| 8962 | 10504278 | <a href="#">NM_177195</a>          | <a href="#">320571</a>    | RIKEN cDNA 4930417M19 gene     | <a href="#">4930417M19Rik</a>      | 0.998 | 0.13     | 0.90041  | 0.960656 |
| 8963 | 10438198 | <a href="#">NM_033609</a>          | <a href="#">94112</a>     | mediator complex subunit 15    | <a href="#">Med15</a>              | 0.998 | -0.178   | 0.863984 | 0.945829 |
| 8964 | 10565924 | <a href="#">NM_177073</a>          | <a href="#">320100</a>    | RELT tumor necrosis factor rec | <a href="#">Relt</a>               | 0.998 | 0.029    | 0.977358 | 0.990677 |
| 8965 | 10398147 | <a href="#">NM_011112</a>          | <a href="#">18789</a>     | poly (A) polymerase alpha      | <a href="#">Papola</a>             | 0.998 | -0.252   | 0.80777  | 0.922567 |
| 8966 | 10597929 | <a href="#">NM_026917</a>          | <a href="#">69035</a>     | zinc finger, DHHC domain conta | <a href="#">Zdhhc3</a>             | 0.998 | -0.139   | 0.893327 | 0.957829 |
| 8967 | 10364962 | <a href="#">NM_028369</a>          | <a href="#">68016</a>     | RIKEN cDNA 2510039E09 gene     | <a href="#">2510039E09Rik</a>      | 0.998 | 0.723837 | 0.923837 | 0.881326 |
| 8968 | 10428554 | <a href="#">NM_080635</a>          | <a href="#">68135</a>     | eukaryotic translation initiat | <a href="#">Eif3h</a>              | 0.998 | -0.538   | 0.606913 | 0.817049 |
| 8969 | 10508619 | <a href="#">NM_030722</a>          | <a href="#">80912</a>     | pumilio 1 (Drosophila)         | <a href="#">Pum1</a>               | 0.998 | -0.226   | 0.827841 | 0.93066  |
| 8970 | 10535189 | <a href="#">NM_010752</a>          | <a href="#">17120</a>     | mitotic arrest deficient 1-lik | <a href="#">Mad11l</a>             | 0.998 | -0.206   | 0.842152 | 0.936059 |
| 8971 | 10415897 | <a href="#">BC048657</a>           | <a href="#">74215</a>     | RIKEN cDNA 1700007N14 gene     | <a href="#">1700007N14Rik</a>      | 0.998 | -0.098   | 0.924876 | 0.970324 |
| 8972 | 10549544 | <a href="#">ENSMUST00000100766</a> | <a href="#">100038707</a> | predicted gene, ENSMUSG0000007 | <a href="#">ENSMUSG00000072655</a> | 0.998 | 0        | 0.999942 | 0.999942 |
| 8973 | 10545212 | <a href="#">ENSMUST00000103364</a> | <a href="#">434037</a>    | predicted gene, ENSMUSG0000007 | <a href="#">ENSMUSG00000076563</a> | 0.998 | 0.27     | 0.794521 | 0.916545 |
| 8974 | 10448459 | <a href="#">NM_173186</a>          | <a href="#">224617</a>    | TBC1 domain family, member 24  | <a href="#">Tbc1d24</a>            | 0.998 | 0.087    | 0.933055 | 0.973286 |
| 8975 | 10489239 | <a href="#">AK079109</a>           | <a href="#">68108</a>     | RIKEN cDNA 9430008C03 gene     | <a href="#">9430008C03Rik</a>      | 0.998 | -0.046   | 0.964489 | 0.985942 |
| 8976 | 10526087 | <a href="#">NM_026445</a>          | <a href="#">67902</a>     | sulfatase modifying factor 2   | <a href="#">Sumf2</a>              | 0.998 | -0.396   | 0.703392 | 0.86989  |
| 8977 | 10427667 |                                    |                           |                                |                                    | 0.998 | 0.112    | 0.913984 | 0.966071 |
| 8978 | 10528872 | <a href="#">NM_009170</a>          | <a href="#">20423</a>     | sonic hedgehog                 | <a href="#">Shh</a>                | 0.998 | -0.093   | 0.928403 | 0.971746 |
| 8979 | 10356800 | <a href="#">NM_133808</a>          | <a href="#">110611</a>    | high density lipoprotein (HDL) | <a href="#">Hdlbp</a>              | 0.998 | -0.648   | 0.537186 | 0.770298 |
| 8980 | 10580903 |                                    |                           |                                |                                    | 0.998 | 0.027    | 0.979102 | 0.991719 |
| 8981 | 10467749 | <a href="#">NM_145123</a>          | <a href="#">72832</a>     | cartilage acidic protein 1     | <a href="#">Crtac1</a>             | 0.998 | -0.119   | 0.908419 | 0.963723 |
| 8982 | 10345401 | <a href="#">BC070435</a>           | <a href="#">211383</a>    | RIKEN cDNA 9430069J07 gene     | <a href="#">9430069J07Rik</a>      | 0.998 | 0.478    | 0.646505 | 0.840625 |
| 8983 | 10481734 | <a href="#">NM_199302</a>          | <a href="#">227738</a>    | leucine rich repeat and steril | <a href="#">Lrsam1</a>             | 0.998 | 0.283    | 0.785021 | 0.912507 |
| 8984 | 10470298 | <a href="#">NM_019833</a>          | <a href="#">56279</a>     | RIKEN cDNA B230317C12 gene     | <a href="#">B230317C12Rik</a>      | 0.998 | -0.096   | 0.925995 | 0.970758 |
| 8985 | 10401698 | <a href="#">AF525300</a>           | <a href="#">238330</a>    | RIKEN cDNA 6430527G18 gene     | <a href="#">6430527G18Rik</a>      | 0.998 | 0.068    | 0.947472 | 0.979243 |
| 8986 | 10474077 | <a href="#">ENSMUST00000099693</a> | <a href="#">100038525</a> | predicted gene, ENSMUSG0000007 | <a href="#">ENSMUSG00000075025</a> | 0.998 | 0.071    | 0.945481 | 0.97847  |
| 8987 | 10558992 | <a href="#">BC034197</a>           | <a href="#">17831</a>     | mucin 2                        | <a href="#">Muc2</a>               | 0.998 | 0.229    | 0.825163 | 0.929627 |
| 8988 | 10566309 | <a href="#">NM_198624</a>          | <a href="#">244179</a>    | ubiquilin-like                 | <a href="#">Ubqln1</a>             | 0.998 | 0.144    | 0.889422 | 0.956457 |
| 8989 | 10570749 | <a href="#">NM_010030</a>          | <a href="#">13215</a>     | defensin beta 2                | <a href="#">Defb2</a>              | 0.998 | 0.375    | 0.718514 | 0.877128 |
| 8990 | 10545910 | <a href="#">NM_025823</a>          | <a href="#">66881</a>     | prenylcysteine oxidase 1       | <a href="#">Pcyox1</a>             | 0.998 | -0.166   | 0.872842 | 0.949165 |
| 8991 | 10376956 | <a href="#">NM_178870</a>          | <a href="#">15478</a>     | heparan sulfate (glucosamine)  | <a href="#">Hs3st3a1</a>           | 0.998 | -0.278   | 0.788446 | 0.913849 |
| 8992 | 10381172 | <a href="#">NM_011488</a>          | <a href="#">20850</a>     | signal transducer and activato | <a href="#">Stat5a</a>             | 0.998 | 0.056    | 0.957044 | 0.983559 |
| 8993 | 10389389 | <a href="#">ENSMUST00000100674</a> | <a href="#">100038438</a> | predicted gene, ENSMUSG0000007 | <a href="#">ENSMUSG00000072590</a> | 0.998 | 0.085    | 0.934635 | 0.973973 |
| 8994 | 10388352 | <a href="#">NM_197943</a>          | <a href="#">97761</a>     | small G protein signaling modu | <a href="#">Sgsm2</a>              | 0.998 | 0.145    | 0.8883   | 0.956025 |
| 8995 | 10553071 | <a href="#">NM_001033356</a>       | <a href="#">243967</a>    | gene model 484, (NCBI)         | <a href="#">Gm484</a>              | 0.998 | 0.574    | 0.583639 | 0.801548 |
| 8996 | 10573733 | <a href="#">BC145737</a>           | <a href="#">214627</a>    | PAP associated domain containi | <a href="#">Papd5</a>              | 0.998 | -0.139   | 0.893079 | 0.957774 |
| 8997 | 10379524 | <a href="#">NM_011330</a>          | <a href="#">20292</a>     | small chemokine (C-C motif) li | <a href="#">Ccl11</a>              | 0.998 | 0.117    | 0.910177 | 0.964056 |
| 8998 | 10384782 | <a href="#">NM_027260</a>          | <a href="#">69922</a>     | vaccinia related kinase 2      | <a href="#">Vrk2</a>               | 0.998 | -0.452   | 0.664784 | 0.85061  |
| 8999 | 10563355 | <a href="#">NM_019934</a>          | <a href="#">56546</a>     | secretory blood group 1        | <a href="#">Sec1</a>               | 0.998 | 0.051    | 0.96036  | 0.985069 |
| 9000 | 10519181 |                                    |                           |                                |                                    | 0.998 | 0.119    | 0.908186 | 0.963723 |
| 9001 | 10401753 | <a href="#">BC023716</a>           | <a href="#">104799</a>    | expressed sequence AI413782    | <a href="#">AI413782</a>           | 0.998 | -0.932   | 0.381705 | 0.651394 |
| 9002 | 10511817 | <a href="#">ENSMUST00000098232</a> | <a href="#">212390</a>    | kelch-like 32 (Drosophila)     | <a href="#">Klh32</a>              | 0.998 | 0.042    | 0.967693 | 0.987137 |
| 9003 | 10361110 | <a href="#">NM_029766</a>          | <a href="#">76843</a>     | denticleless homolog (Drosophi | <a href="#">Dtl</a>                | 0.998 | -0.519   | 0.61935  | 0.82476  |
| 9004 | 10403453 | <a href="#">NM_001081426</a>       | <a href="#">208440</a>    | DIP2 disco-interacting protein | <a href="#">Dip2c</a>              | 0.998 | -0.048   | 0.962876 | 0.985577 |
| 9005 | 10512254 | <a href="#">NM_001048005</a>       | <a href="#">73721</a>     | RIKEN cDNA 1110017D15 gene     | <a href="#">1110017D15Rik</a>      | 0.998 | 0.05     | 0.961116 | 0.985069 |
| 9006 | 10597095 | <a href="#">BC061210</a>           | <a href="#">378954</a>    | RIKEN cDNA 3000002C10 gene     | <a href="#">3000002C10Rik</a>      | 0.998 | -0.318   | 0.759537 | 0.899247 |
|      |          |                                    |                           | RIKEN cDNA 6720462M24          |                                    |       |          |          |          |

|      |          |                                    |                           |                                            |                               |       |        |          |          |
|------|----------|------------------------------------|---------------------------|--------------------------------------------|-------------------------------|-------|--------|----------|----------|
| 9007 | 10416736 | <a href="#">BC052183</a>           | <a href="#">77744</a>     | RIKEN cDNA 0720405M24 gene                 | <a href="#">6720463M24Rik</a> | 0.998 | -0.007 | 0.994952 | 0.998046 |
| 9008 | 10520633 | <a href="#">NM_053085</a>          | <a href="#">69852</a>     | transcription factor 23                    | <a href="#">Tcf23</a>         | 0.998 | 0.225  | 0.82826  | 0.930848 |
| 9009 | 10400589 | <a href="#">BC052175</a>           | <a href="#">217653</a>    | expressed sequence C79407                  | <a href="#">C79407</a>        | 0.998 | 0.105  | 0.919088 | 0.967837 |
| 9010 | 10345620 | <a href="#">NM_027098</a>          | <a href="#">107734</a>    | mitochondrial ribosomal protei             | <a href="#">Mrpl30</a>        | 0.998 | -1.216 | 0.262204 | 0.53666  |
| 9011 | 10580516 | <a href="#">XR_031896</a>          | <a href="#">625801</a>    | predicted gene, EG625801                   | <a href="#">EG625801</a>      | 0.998 | 0.046  | 0.964377 | 0.985919 |
| 9012 | 10350853 |                                    |                           |                                            |                               | 0.998 | -0.058 | 0.955073 | 0.982833 |
| 9013 | 10463173 | <a href="#">NM_023740</a>          | <a href="#">74168</a>     | zinc finger, DHHC domain conta             | <a href="#">Zdhhc16</a>       | 0.998 | -0.937 | 0.379031 | 0.648769 |
| 9014 | 10345556 | <a href="#">XR_032810</a>          | <a href="#">100046859</a> | hypothetical protein LOC100046             | <a href="#">LOC100046859</a>  | 0.998 | 0.358  | 0.730489 | 0.883456 |
| 9015 | 10537911 | <a href="#">NM_027477</a>          | <a href="#">272347</a>    | zinc finger protein 398                    | <a href="#">Zfp398</a>        | 0.998 | 0.337  | 0.745374 | 0.891675 |
| 9016 | 10402073 | <a href="#">BC049109</a>           | <a href="#">78767</a>     | RIKEN cDNA 2610021K21 gene                 | <a href="#">2610021K21Rik</a> | 0.998 | -0.407 | 0.696116 | 0.866518 |
| 9017 | 10401267 | <a href="#">NM_177267</a>          | <a href="#">320808</a>    | WD repeat domain 22                        | <a href="#">Wdr22</a>         | 0.998 | 0.047  | 0.964116 | 0.985864 |
| 9018 | 10481627 | <a href="#">NM_008491</a>          | <a href="#">16819</a>     | lipocalin 2                                | <a href="#">Lcn2</a>          | 0.998 | 0.367  | 0.723941 | 0.88046  |
| 9019 | 10509868 | <a href="#">NM_029097</a>          | <a href="#">74772</a>     | ATPase type 13A2                           | <a href="#">Atp13a2</a>       | 0.998 | 0.016  | 0.987864 | 0.994998 |
| 9020 | 10405400 | <a href="#">NM_008739</a>          | <a href="#">18193</a>     | nuclear receptor-binding SET-d             | <a href="#">Nsd1</a>          | 0.998 | -0.189 | 0.855193 | 0.941477 |
| 9021 | 10492536 |                                    |                           |                                            |                               | 0.998 | 0.033  | 0.974449 | 0.989186 |
| 9022 | 10482017 | <a href="#">NM_026697</a>          | <a href="#">68365</a>     | RAB14, member RAS oncogene fam             | <a href="#">Rab14</a>         | 0.998 | -0.193 | 0.851943 | 0.940258 |
| 9023 | 10533446 | <a href="#">NM_001039153</a>       | <a href="#">654470</a>    | tectonic 1                                 | <a href="#">Tect1</a>         | 0.998 | 0.161  | 0.87637  | 0.951084 |
| 9024 | 10376339 | <a href="#">NM_182996</a>          | <a href="#">103836</a>    | zinc finger protein 692                    | <a href="#">Zfp692</a>        | 0.998 | 0.145  | 0.888379 | 0.956025 |
| 9025 | 10550906 | <a href="#">NM_011113</a>          | <a href="#">18793</a>     | plasminogen activator, urokina             | <a href="#">Plaur</a>         | 0.997 | -0.171 | 0.868911 | 0.947512 |
| 9026 | 10566379 | <a href="#">NM_147049</a>          | <a href="#">259051</a>    | olfactory receptor 658                     | <a href="#">Olfr658</a>       | 0.997 | 0.072  | 0.944469 | 0.978004 |
| 9027 | 10573790 | <a href="#">NM_145857</a>          | <a href="#">257632</a>    | nucleotide-binding oligomeriza             | <a href="#">Nod2</a>          | 0.997 | 0.029  | 0.977817 | 0.99094  |
| 9028 | 10544036 | <a href="#">NM_080467</a>          | <a href="#">140494</a>    | ATPase, H <sup>+</sup> transporting, lysos | <a href="#">Atp6v0a4</a>      | 0.997 | 0.248  | 0.811234 | 0.923829 |
| 9029 | 10594638 | <a href="#">NM_026674</a>          | <a href="#">68318</a>     | anterior pharynx defective 1c              | <a href="#">Aph1c</a>         | 0.997 | 0.031  | 0.976353 | 0.990137 |
| 9030 | 10461017 | <a href="#">NM_007522</a>          | <a href="#">12015</a>     | Bcl-associated death promoter              | <a href="#">Bad</a>           | 0.997 | -0.107 | 0.917691 | 0.967684 |
| 9031 | 10378053 | <a href="#">BC029115</a>           | <a href="#">109212</a>    | RIKEN cDNA 6720460F02 gene                 | <a href="#">6720460F02Rik</a> | 0.997 | 0.054  | 0.958683 | 0.984334 |
| 9032 | 10353689 | <a href="#">NM_001081080</a>       | <a href="#">213109</a>    | PHD finger protein 3                       | <a href="#">Phf3</a>          | 0.997 | -0.363 | 0.726804 | 0.881629 |
| 9033 | 10406787 | <a href="#">NM_025420</a>          | <a href="#">68018</a>     | collagen, type IV, alpha 3 (Go             | <a href="#">Col4a3bp</a>      | 0.997 | -0.314 | 0.762371 | 0.901088 |
| 9034 | 10590801 | <a href="#">NM_007464</a>          | <a href="#">11796</a>     | baculoviral IAP repeat-contain             | <a href="#">Birc3</a>         | 0.997 | -0.259 | 0.802921 | 0.920071 |
| 9035 | 10361669 | <a href="#">NM_011835</a>          | <a href="#">23924</a>     | katanin p60 (ATPase-containing             | <a href="#">Katna1</a>        | 0.997 | -0.611 | 0.559865 | 0.787244 |
| 9036 | 10421717 | <a href="#">NM_001033440</a>       | <a href="#">380920</a>    | gene model 1587, (NCBI)                    | <a href="#">Gm1587</a>        | 0.997 | 0.026  | 0.98032  | 0.991919 |
| 9037 | 10481164 | <a href="#">NM_172659</a>          | <a href="#">227659</a>    | solute carrier family 2 (facil             | <a href="#">Slc2a6</a>        | 0.997 | 0.157  | 0.879829 | 0.952394 |
| 9038 | 10586842 | <a href="#">ENSMUST00000098589</a> | <a href="#">235461</a>    | RIKEN cDNA B230380D07 gene                 | <a href="#">B230380D07Rik</a> | 0.997 | -0.126 | 0.903453 | 0.962464 |
| 9039 | 10375014 | <a href="#">BC114574</a>           | <a href="#">67592</a>     | RIKEN cDNA 4930524B15 gene                 | <a href="#">4930524B15Rik</a> | 0.997 | 0.194  | 0.851668 | 0.940193 |
| 9040 | 10472289 | <a href="#">NM_011529</a>          | <a href="#">21353</a>     | TRAF family member-associated              | <a href="#">Tank</a>          | 0.997 | -0.366 | 0.72475  | 0.880713 |
| 9041 | 10514892 | <a href="#">NM_025617</a>          | <a href="#">66526</a>     | RIKEN cDNA 2210012G02 gene                 | <a href="#">2210012G02Rik</a> | 0.997 | -0.464 | 0.656217 | 0.846043 |
| 9042 | 10417048 | <a href="#">NM_015820</a>          | <a href="#">50787</a>     | heparan sulfate 6-O-sulfotrans             | <a href="#">Hs6st3</a>        | 0.997 | 0.006  | 0.995754 | 0.998271 |
| 9043 | 10461842 |                                    |                           |                                            |                               | 0.997 | 0.092  | 0.929305 | 0.972164 |
| 9044 | 10401441 | <a href="#">ENSMUST00000046266</a> | <a href="#">238317</a>    | RIKEN cDNA C130039O16 gene                 | <a href="#">C130039O16Rik</a> | 0.997 | -0.485 | 0.642353 | 0.83808  |
| 9045 | 10351414 | <a href="#">NM_019993</a>          | <a href="#">56752</a>     | aldehyde dehydrogenase 9, subf             | <a href="#">Aldh9a1</a>       | 0.997 | -0.239 | 0.81799  | 0.927626 |
| 9046 | 10545940 | <a href="#">NM_011818</a>          | <a href="#">23885</a>     | germ cell-less homolog 1 (Dros             | <a href="#">Gmcl1</a>         | 0.997 | -0.021 | 0.983625 | 0.992971 |
| 9047 | 10542302 | <a href="#">NM_177687</a>          | <a href="#">232430</a>    | cAMP responsive element bindin             | <a href="#">Creb12</a>        | 0.997 | 0.226  | 0.827591 | 0.93066  |
| 9048 | 10576784 | <a href="#">NM_133238</a>          | <a href="#">170786</a>    | CD209a antigen                             | <a href="#">Cd209a</a>        | 0.997 | -0.122 | 0.906046 | 0.963405 |
| 9049 | 10500333 | <a href="#">NM_033596</a>          | <a href="#">97122</a>     | histone cluster 2, H4                      | <a href="#">Hist2h4</a>       | 0.997 | -0.45  | 0.666229 | 0.851266 |
| 9050 | 10552796 | <a href="#">NM_001077591</a>       | <a href="#">22116</a>     | serine/threonine kinase 22 sub             | <a href="#">Stk22s1</a>       | 0.997 | -0.208 | 0.841277 | 0.935777 |
| 9051 | 10373542 | <a href="#">NM_016811</a>          | <a href="#">13139</a>     | diacylglycerol kinase, alpha               | <a href="#">Dgka</a>          | 0.997 | 0.073  | 0.943832 | 0.977948 |
| 9052 | 10532124 | <a href="#">NM_010278</a>          | <a href="#">14581</a>     | growth factor independent 1                | <a href="#">Gfi1</a>          | 0.997 | 0.063  | 0.951777 | 0.981246 |
| 9053 | 10462228 | <a href="#">NM_177360</a>          | <a href="#">240590</a>    | doublesex and mab-3 related tr             | <a href="#">Dmrt3</a>         | 0.997 | -0.077 | 0.940958 | 0.97709  |
| 9054 | 10451458 | <a href="#">NM_028065</a>          | <a href="#">72029</a>     | canopy 3 homolog (zebrafish)               | <a href="#">Cnpy3</a>         | 0.997 | -0.721 | 0.493552 | 0.739168 |
| 9055 | 10531627 | <a href="#">AK044414</a>           | <a href="#">319818</a>    | RIKEN cDNA A930011G23 gene                 | <a href="#">A930011G23Rik</a> | 0.997 | -0.117 | 0.910189 | 0.964056 |
| 9056 | 10551410 | <a href="#">NM_009560</a>          | <a href="#">22718</a>     | zinc finger protein 60                     | <a href="#">Zfp60</a>         | 0.997 | -0.331 | 0.749778 | 0.894303 |
| 9057 | 10540993 | <a href="#">NM_138311</a>          | <a href="#">171506</a>    | H1 histone family, member O, o             | <a href="#">H1foo</a>         | 0.997 | 0.192  | 0.853133 | 0.940713 |

|      |          |                                    |                        |                                 |                               |       |        |          |          |
|------|----------|------------------------------------|------------------------|---------------------------------|-------------------------------|-------|--------|----------|----------|
| 9058 | 10475027 | <a href="#">NM_019392</a>          | <a href="#">22174</a>  | TYRO3 protein tyrosine kinase   | <a href="#">Tyro3</a>         | 0.997 | -0.351 | 0.735901 | 0.886874 |
| 9059 | 10508272 | <a href="#">ENSMUST00000074081</a> | <a href="#">329942</a> | CUB and Sushi multiple domains  | <a href="#">Csm2</a>          | 0.997 | 0.021  | 0.983819 | 0.993071 |
| 9060 | 10377953 | <a href="#">NM_153103</a>          | <a href="#">16562</a>  | kinesin family member 1C        | <a href="#">Kif1c</a>         | 0.997 | -0.345 | 0.740072 | 0.889339 |
| 9061 | 10523683 | <a href="#">NM_010080</a>          | <a href="#">666279</a> | dentin sialophosphoprotein      | <a href="#">Dsp</a>           | 0.997 | 0.037  | 0.971597 | 0.988148 |
| 9062 | 10525839 |                                    |                        |                                 |                               | 0.997 | 0.277  | 0.789483 | 0.914397 |
| 9063 | 10366586 | <a href="#">NM_008337</a>          | <a href="#">15978</a>  | interferon gamma                | <a href="#">Ifng</a>          | 0.997 | -0.276 | 0.790072 | 0.914502 |
| 9064 | 10496946 | <a href="#">NM_198416</a>          | <a href="#">108946</a> | zinc finger, ZZ domain contain  | <a href="#">Zzz3</a>          | 0.997 | -0.527 | 0.613863 | 0.821228 |
| 9065 | 10521698 |                                    |                        |                                 |                               | 0.997 | 0.074  | 0.942871 | 0.977825 |
| 9066 | 10383897 | <a href="#">NM_010898</a>          | <a href="#">18016</a>  | neurofibromatosis 2             | <a href="#">Nf2</a>           | 0.997 | -0.418 | 0.687947 | 0.862647 |
| 9067 | 10373642 | <a href="#">NM_146550</a>          | <a href="#">258543</a> | olfactory receptor 810          | <a href="#">Olf810</a>        | 0.997 | 0.13   | 0.900091 | 0.960389 |
| 9068 | 10539617 | <a href="#">NM_145223</a>          | <a href="#">236266</a> | Alstrom syndrome 1 homolog (hu) | <a href="#">Alms1</a>         | 0.997 | -0.17  | 0.869322 | 0.947675 |
| 9069 | 10431856 | <a href="#">NM_028148</a>          | <a href="#">72193</a>  | splicing factor, arginine/seri  | <a href="#">Sfrs2ip</a>       | 0.997 | -0.609 | 0.561193 | 0.788377 |
| 9070 | 10477791 | <a href="#">NM_139151</a>          | <a href="#">245865</a> | sperm associated antigen 4      | <a href="#">Spag4</a>         | 0.997 | 0.706  | 0.502619 | 0.745467 |
| 9071 | 10489784 | <a href="#">NM_177782</a>          | <a href="#">277360</a> | cDNA sequence BC067047          | <a href="#">BC067047</a>      | 0.997 | -0.009 | 0.993162 | 0.997422 |
| 9072 | 10347781 | <a href="#">BC082310</a>           | <a href="#">241134</a> | RIKEN cDNA 9430031J16 gene      | <a href="#">9430031J16Rik</a> | 0.997 | 0.347  | 0.738392 | 0.88844  |
| 9073 | 10358140 | <a href="#">EU429481</a>           | <a href="#">226438</a> | immunoglobulin-like and fibron  | <a href="#">Igfn1</a>         | 0.997 | 0.466  | 0.655086 | 0.845541 |
| 9074 | 10512274 | <a href="#">BC021944</a>           | <a href="#">69638</a>  | RIKEN cDNA 2310040A07 gene      | <a href="#">2310040A07Rik</a> | 0.997 | -0.13  | 0.900115 | 0.960389 |
| 9075 | 10604403 |                                    |                        |                                 |                               | 0.997 | -0.025 | 0.980759 | 0.991919 |
| 9076 | 10557895 | <a href="#">NM_021334</a>          | <a href="#">16411</a>  | integrin alpha X                | <a href="#">Itgax</a>         | 0.997 | -0.024 | 0.981385 | 0.992092 |
| 9077 | 10527624 | <a href="#">NM_001115153</a>       | <a href="#">231915</a> | ubiquitin specific peptidase 1  | <a href="#">Usp1</a>          | 0.997 | -0.641 | 0.541457 | 0.773858 |
| 9078 | 10465559 | <a href="#">NM_011697</a>          | <a href="#">22340</a>  | vascular endothelial growth fa  | <a href="#">Vegfb</a>         | 0.997 | -0.091 | 0.930288 | 0.97262  |
| 9079 | 10501104 | <a href="#">NM_172271</a>          | <a href="#">229706</a> | solute carrier family 6 (neuro  | <a href="#">Slc6a17</a>       | 0.997 | 0.018  | 0.985828 | 0.994073 |
| 9080 | 10398193 | <a href="#">ENSMUST00000082269</a> | <a href="#">73160</a>  | RIKEN cDNA 3110018I06 gene      | <a href="#">3110018I06Rik</a> | 0.997 | 0.162  | 0.875784 | 0.950887 |
| 9081 | 10432154 | <a href="#">NM_147036</a>          | <a href="#">259038</a> | olfactory receptor 283          | <a href="#">Olf283</a>        | 0.997 | 0.04   | 0.968884 | 0.987519 |
| 9082 | 10489065 | <a href="#">NM_013865</a>          | <a href="#">29812</a>  | N-myc downstream regulated gen  | <a href="#">Ndr3</a>          | 0.997 | -0.478 | 0.646649 | 0.840625 |
| 9083 | 10419825 | <a href="#">NM_023190</a>          | <a href="#">56215</a>  | apoptotic chromatin condensati  | <a href="#">Acin1</a>         | 0.997 | -0.321 | 0.756977 | 0.898026 |
| 9084 | 10411958 | <a href="#">NM_027934</a>          | <a href="#">71816</a>  | ring finger protein 180         | <a href="#">Rnf180</a>        | 0.997 | -0.189 | 0.855418 | 0.941478 |
| 9085 | 10439068 | <a href="#">NM_145932</a>          | <a href="#">106407</a> | organic solute transporter alp  | <a href="#">Osta</a>          | 0.997 | 0.262  | 0.800584 | 0.91941  |
| 9086 | 10516081 | <a href="#">NM_019489</a>          | <a href="#">56031</a>  | peptidylprolyl isomerase E (cy  | <a href="#">Ppie</a>          | 0.997 | -0.069 | 0.946578 | 0.978837 |
| 9087 | 10454786 | <a href="#">NM_009818</a>          | <a href="#">12385</a>  | catenin (cadherin associated p  | <a href="#">Cttna1</a>        | 0.997 | -0.587 | 0.575014 | 0.797076 |
| 9088 | 10482528 | <a href="#">NM_010889</a>          | <a href="#">17996</a>  | nebulin                         | <a href="#">Neb</a>           | 0.997 | 0.193  | 0.852008 | 0.940258 |
| 9089 | 10395984 | <a href="#">BC062107</a>           | <a href="#">328108</a> | RIKEN cDNA A430041B07 gene      | <a href="#">A430041B07Rik</a> | 0.997 | -0.631 | 0.547544 | 0.778461 |
| 9090 | 10527285 | <a href="#">ENSMUST00000031618</a> | <a href="#">75136</a>  | RIKEN cDNA 4930526H21 gene      | <a href="#">4930526H21Rik</a> | 0.997 | -0.12  | 0.907951 | 0.963723 |
| 9091 | 10428008 | <a href="#">NM_027496</a>          | <a href="#">67434</a>  | RIKEN cDNA 5730557B15 gene      | <a href="#">5730557B15Rik</a> | 0.997 | -0.082 | 0.93694  | 0.975366 |
| 9092 | 10569539 | <a href="#">NM_203492</a>          | <a href="#">381974</a> | MAS-related GPR, member G       | <a href="#">Mrgprg</a>        | 0.997 | 0.217  | 0.834353 | 0.933071 |
| 9093 | 10380614 | <a href="#">NM_008267</a>          | <a href="#">15408</a>  | homeo box B13                   | <a href="#">Hoxb13</a>        | 0.997 | -0.08  | 0.938364 | 0.976019 |
| 9094 | 10568228 | <a href="#">BC058799</a>           | <a href="#">269997</a> | RIKEN cDNA 6430604K15 gene      | <a href="#">6430604K15Rik</a> | 0.997 | 0.282  | 0.785545 | 0.912507 |
| 9095 | 10569513 | <a href="#">NM_024289</a>          | <a href="#">79196</a>  | oxysterol binding protein-like  | <a href="#">Osbp15</a>        | 0.997 | -0.006 | 0.995633 | 0.998271 |
| 9096 | 10434446 | <a href="#">NM_139293</a>          | <a href="#">107522</a> | endothelin converting enzyme 2  | <a href="#">Ece2</a>          | 0.997 | -0.212 | 0.837781 | 0.934421 |
| 9097 | 10421810 | <a href="#">NM_025427</a>          | <a href="#">66214</a>  | RIKEN cDNA 1190002H23 gene      | <a href="#">1190002H23Rik</a> | 0.997 | 0.153  | 0.882266 | 0.953469 |
| 9098 | 10474335 | <a href="#">NM_028260</a>          | <a href="#">66541</a>  | IMP1 inner mitochondrial membr  | <a href="#">Immp1</a>         | 0.997 | -0.469 | 0.652854 | 0.844541 |
| 9099 | 10575578 | <a href="#">NM_198308</a>          | <a href="#">319518</a> | RIKEN cDNA 4930402E16 gene      | <a href="#">4930402E16Rik</a> | 0.997 | -0.457 | 0.660996 | 0.84894  |
| 9100 | 10532802 | <a href="#">NM_175016</a>          | <a href="#">231642</a> | alkB, alkylation repair homolo  | <a href="#">Alkbh2</a>        | 0.997 | -0.795 | 0.451779 | 0.708709 |
| 9101 | 10348641 | <a href="#">NM_146491</a>          | <a href="#">258484</a> | olfactory receptor 1410         | <a href="#">Olf1410</a>       | 0.996 | 0.42   | 0.686374 | 0.861515 |
| 9102 | 10365174 | <a href="#">NM_027480</a>          | <a href="#">70615</a>  | ankyrin repeat domain 24        | <a href="#">Ankrd24</a>       | 0.996 | -0.069 | 0.946528 | 0.978837 |
| 9103 | 10368596 | <a href="#">ENSMUST00000092602</a> | <a href="#">432450</a> | Na+/K+ transporting ATPase int  | <a href="#">Nkain2</a>        | 0.996 | 0.141  | 0.891455 | 0.957571 |
| 9104 | 10585249 | <a href="#">NM_001034085</a>       | <a href="#">73699</a>  | protein phosphatase 2 (formerl  | <a href="#">Ppp2r1b</a>       | 0.996 | -0.031 | 0.975794 | 0.989981 |
| 9105 | 10558297 | <a href="#">BC072596</a>           | <a href="#">214764</a> | RIKEN cDNA 2700050L05 gene      | <a href="#">2700050L05Rik</a> | 0.996 | -0.256 | 0.805289 | 0.921326 |
| 9106 | 10489235 |                                    |                        |                                 |                               | 0.996 | -0.036 | 0.971931 | 0.988148 |

|      |          |                                    |                           |                                 |                               |       |        |          |          |
|------|----------|------------------------------------|---------------------------|---------------------------------|-------------------------------|-------|--------|----------|----------|
| 9107 | 10531383 | <a href="#">NM_172713</a>          | <a href="#">231452</a>    | SDA1 domain containing 1        | <a href="#">Sdad1</a>         | 0.996 | -0.432 | 0.67833  | 0.857067 |
| 9108 | 10450280 | <a href="#">NM_011413</a>          | <a href="#">625018</a>    | complement component 4A (Rodge) | <a href="#">C4a</a>           | 0.996 | -0.096 | 0.926178 | 0.970758 |
| 9109 | 10396121 | <a href="#">ENSMUST00000021378</a> | <a href="#">74724</a>     | RIKEN cDNA 4930512B01 gene      | <a href="#">4930512B01Rik</a> | 0.996 | 0.248  | 0.810709 | 0.923749 |
| 9110 | 10601865 | <a href="#">XR_032046</a>          | <a href="#">666196</a>    | similar to Btf3 protein         | <a href="#">LOC666196</a>     | 0.996 | -0.133 | 0.897674 | 0.959787 |
| 9111 | 10364217 | <a href="#">NM_029661</a>          | <a href="#">76573</a>     | RIKEN cDNA 1700027D21 gene      | <a href="#">1700027D21Rik</a> | 0.996 | 0.147  | 0.887458 | 0.955613 |
| 9112 | 10572456 | <a href="#">NM_010592</a>          | <a href="#">16478</a>     | Jun proto-oncogene related gen  | <a href="#">Jund</a>          | 0.996 | -0.12  | 0.907558 | 0.963723 |
| 9113 | 10453254 | <a href="#">NM_009187</a>          | <a href="#">20463</a>     | cytochrome c oxidase subunit V  | <a href="#">Cox7a2l</a>       | 0.996 | -0.312 | 0.764139 | 0.90173  |
| 9114 | 10401488 | <a href="#">NM_008992</a>          | <a href="#">19300</a>     | ATP-binding cassette, sub-fami  | <a href="#">Abcd4</a>         | 0.996 | -0.001 | 0.999352 | 0.999589 |
| 9115 | 10523151 | <a href="#">NM_008176</a>          | <a href="#">14825</a>     | chemokine (C-X-C motif) ligand  | <a href="#">Cxcl1</a>         | 0.996 | -0.234 | 0.821377 | 0.92863  |
| 9116 | 10561513 | <a href="#">NM_011885</a>          | <a href="#">24030</a>     | mitochondrial ribosomal protei  | <a href="#">Mrps12</a>        | 0.996 | -0.297 | 0.774888 | 0.907674 |
| 9117 | 10391301 | <a href="#">NM_213659</a>          | <a href="#">20848</a>     | signal transducer and activato  | <a href="#">Stat3</a>         | 0.996 | -0.233 | 0.822191 | 0.928853 |
| 9118 | 10391831 | <a href="#">NM_026551</a>          | <a href="#">68087</a>     | dephospho-CoA kinase domain co  | <a href="#">Dcakd</a>         | 0.996 | -0.656 | 0.532337 | 0.766374 |
| 9119 | 10458398 | <a href="#">NM_008214</a>          | <a href="#">15115</a>     | histidyl-tRNA synthetase        | <a href="#">Hars</a>          | 0.996 | -0.464 | 0.656014 | 0.846043 |
| 9120 | 10393917 | <a href="#">NM_016665</a>          | <a href="#">20892</a>     | stimulated by retinoic acid 13  | <a href="#">Stra13</a>        | 0.996 | -0.392 | 0.706312 | 0.871814 |
| 9121 | 10451195 | <a href="#">ENSMUST00000039106</a> | <a href="#">72240</a>     | RIKEN cDNA 1600014C23 gene      | <a href="#">1600014C23Rik</a> | 0.996 | -0.231 | 0.823681 | 0.929493 |
| 9122 | 10393021 | <a href="#">NM_130454</a>          | <a href="#">170472</a>    | RecQ protein-like 5             | <a href="#">Recql5</a>        | 0.996 | 0.006  | 0.995165 | 0.998139 |
| 9123 | 10472443 | <a href="#">ENSMUST00000116497</a> | <a href="#">383710</a>    | gene model 1323, (NCBI)         | <a href="#">Gm1323</a>        | 0.996 | -0.101 | 0.922554 | 0.969122 |
| 9124 | 10524555 | <a href="#">NM_023556</a>          | <a href="#">17855</a>     | mevalonate kinase               | <a href="#">Mvk</a>           | 0.996 | -0.065 | 0.949686 | 0.980608 |
| 9125 | 10535954 | <a href="#">BC037393</a>           | <a href="#">381695</a>    | NEDD4 binding protein 2-like 2  | <a href="#">N4bp2l2</a>       | 0.996 | 0.22   | 0.83207  | 0.932638 |
| 9126 | 10488844 | <a href="#">NM_019825</a>          | <a href="#">56406</a>     | nuclear receptor coactivator 6  | <a href="#">Ncoa6</a>         | 0.996 | -0.195 | 0.850482 | 0.939883 |
| 9127 | 10492615 | <a href="#">NM_001018031</a>       | <a href="#">229389</a>    | gene model 414, (NCBI)          | <a href="#">Gm414</a>         | 0.996 | -0.22  | 0.832008 | 0.932638 |
| 9128 | 10460392 | <a href="#">NM_027196</a>          | <a href="#">69745</a>     | polymerase (DNA-directed), del  | <a href="#">Pold4</a>         | 0.996 | -0.073 | 0.943975 | 0.977948 |
| 9129 | 10384985 | <a href="#">NM_010117</a>          | <a href="#">13650</a>     | rhomboid family 1 (Drosophila)  | <a href="#">Rhbdfl</a>        | 0.996 | -0.447 | 0.667777 | 0.851815 |
| 9130 | 10533088 | <a href="#">ENSMUST00000100834</a> | <a href="#">100039359</a> | hypothetical protein LOC100039  | <a href="#">LOC100039359</a>  | 0.996 | 0.152  | 0.883116 | 0.953998 |
| 9131 | 10541268 | <a href="#">NM_001081048</a>       | <a href="#">71803</a>     | solute carrier family 25 (mito  | <a href="#">Slc25a18</a>      | 0.996 | 0.119  | 0.908527 | 0.963723 |
| 9132 | 10489620 | <a href="#">NM_144892</a>          | <a href="#">228869</a>    | nuclear receptor coactivator 5  | <a href="#">Ncoa5</a>         | 0.996 | -0.366 | 0.724561 | 0.880619 |
| 9133 | 10348144 | <a href="#">ENSMUST00000044533</a> | <a href="#">69453</a>     | RIKEN cDNA 1700027L20 gene      | <a href="#">1700027L20Rik</a> | 0.996 | 0      | 0.999833 | 0.99988  |
| 9134 | 10444637 | <a href="#">NM_138582</a>          | <a href="#">27762</a>     | DNA segment, Chr 17, human D6S  | <a href="#">D17H6S56E-3</a>   | 0.996 | -0.308 | 0.766986 | 0.90301  |
| 9135 | 10558458 | <a href="#">NM_026391</a>          | <a href="#">52432</a>     | protein phosphatase 2, regulat  | <a href="#">Ppp2r2d</a>       | 0.996 | -0.493 | 0.636449 | 0.834887 |
| 9136 | 10390831 | <a href="#">NM_010660</a>          | <a href="#">16661</a>     | keratin 10                      | <a href="#">Krt10</a>         | 0.996 | -0.402 | 0.699583 | 0.868422 |
| 9137 | 10450191 | <a href="#">NR_004051</a>          | <a href="#">81497</a>     | butyrophilin-like 5             | <a href="#">Btnl5</a>         | 0.996 | -0.351 | 0.73526  | 0.886784 |
| 9138 | 10559367 | <a href="#">NM_010202</a>          | <a href="#">14175</a>     | fibroblast growth factor 4      | <a href="#">Fgf4</a>          | 0.996 | -0.374 | 0.71936  | 0.877778 |
| 9139 | 10424746 | <a href="#">NM_030199</a>          | <a href="#">78834</a>     | zinc finger protein 623         | <a href="#">Zfp623</a>        | 0.996 | -0.554 | 0.596507 | 0.809898 |
| 9140 | 10401795 | <a href="#">NM_001102565</a>       | <a href="#">211064</a>    | alkB, alkylation repair homolo  | <a href="#">Alkbh1</a>        | 0.996 | -0.289 | 0.780629 | 0.910911 |
| 9141 | 10603373 | <a href="#">NM_019478</a>          | <a href="#">54633</a>     | polyglutamine binding protein   | <a href="#">Pqbp1</a>         | 0.996 | -0.334 | 0.748187 | 0.893262 |
| 9142 | 10421737 | <a href="#">NM_011613</a>          | <a href="#">21943</a>     | tumor necrosis factor (ligand)  | <a href="#">Tnfsf11</a>       | 0.996 | -0.057 | 0.956127 | 0.983285 |
| 9143 | 10572083 |                                    |                           |                                 |                               | 0.996 | 0.36   | 0.728934 | 0.882586 |
| 9144 | 10364455 | <a href="#">NM_177613</a>          | <a href="#">216150</a>    | cell division cycle 34 homolog  | <a href="#">Cdc34</a>         | 0.996 | -0.419 | 0.687222 | 0.862117 |
| 9145 | 10363333 | <a href="#">NM_172788</a>          | <a href="#">237353</a>    | SH3 multiple domains 4          | <a href="#">Sh3md4</a>        | 0.996 | 0.211  | 0.838903 | 0.934797 |
| 9146 | 10557397 | <a href="#">ENSMUST00000042859</a> | <a href="#">233865</a>    | RIKEN cDNA D430042O09 gene      | <a href="#">D430042O09Rik</a> | 0.996 | 0.19   | 0.854539 | 0.94107  |
| 9147 | 10572669 | <a href="#">ENSMUST00000073799</a> | <a href="#">100037278</a> | BCNP1 homolog                   | <a href="#">Bcnpl</a>         | 0.996 | -0.521 | 0.617881 | 0.823459 |
| 9148 | 10593174 |                                    |                           |                                 |                               | 0.996 | 0.278  | 0.788977 | 0.914104 |
| 9149 | 10484854 | <a href="#">NM_010990</a>          | <a href="#">18347</a>     | olfactory receptor 48           | <a href="#">Olfr48</a>        | 0.996 | 0.073  | 0.943541 | 0.977948 |
| 9150 | 10469243 |                                    |                           |                                 |                               | 0.996 | 0.221  | 0.831366 | 0.932333 |
| 9151 | 10446441 | <a href="#">NM_001003919</a>       | <a href="#">320209</a>    | DEAD/H (Asp-Glu-Ala-Asp/His) b  | <a href="#">Ddx11</a>         | 0.996 | -0.396 | 0.703505 | 0.869929 |
| 9152 | 10558698 | <a href="#">NM_027019</a>          | <a href="#">69287</a>     | outer dense fiber of sperm tai  | <a href="#">Odf3</a>          | 0.996 | -0.194 | 0.851546 | 0.940193 |
| 9153 | 10419691 | <a href="#">NM_019721</a>          | <a href="#">56335</a>     | methyltransferase-like 3        | <a href="#">Mettl3</a>        | 0.996 | -0.103 | 0.92057  | 0.968204 |
| 9154 | 10514763 | <a href="#">NM_146148</a>          | <a href="#">230558</a>    | complement component 8, alpha   | <a href="#">C8a</a>           | 0.996 | 0.159  | 0.877734 | 0.951715 |
| 9155 | 10541885 | <a href="#">NM_011324</a>          | <a href="#">20276</a>     | sodium channel, nonvoltage-gat  | <a href="#">Scn1la</a>        | 0.996 | -0.317 | 0.76058  | 0.900078 |
| 9156 | 10539818 | <a href="#">NM_018762</a>          | <a href="#">54368</a>     | glycoprotein 9 (platelet)       | <a href="#">Gp9</a>           | 0.996 | -0.321 | 0.757231 | 0.898087 |

|      |          |                                    |                           |                                |                                    |       |        |          |          |
|------|----------|------------------------------------|---------------------------|--------------------------------|------------------------------------|-------|--------|----------|----------|
| 9157 | 10602499 |                                    |                           |                                |                                    | 0.996 | 0.397  | 0.703193 | 0.869747 |
| 9158 | 10471171 | <a href="#">NM_001033389</a>       | <a href="#">320267</a>    | far upstream element (FUSE) bi | <a href="#">Fubp3</a>              | 0.996 | -0.186 | 0.857619 | 0.94267  |
| 9159 | 10380474 | <a href="#">NM_018792</a>          | <a href="#">54388</a>     | histone H1-like protein in spe | <a href="#">Hils1</a>              | 0.996 | -0.201 | 0.845881 | 0.937284 |
| 9160 | 10601753 | <a href="#">XR_030778</a>          | <a href="#">674122</a>    | hypothetical LOC674122         | <a href="#">LOC674122</a>          | 0.996 | -0.424 | 0.684084 | 0.860099 |
| 9161 | 10537078 | <a href="#">NM_013791</a>          | <a href="#">27418</a>     | muskelin 1, intracellular medi | <a href="#">Mkln1</a>              | 0.996 | -0.485 | 0.641843 | 0.837827 |
| 9162 | 10514292 | <a href="#">NM_206975</a>          | <a href="#">404549</a>    | interferon, alpha 14           | <a href="#">Ifna14</a>             | 0.996 | 0.383  | 0.712753 | 0.874143 |
| 9163 | 10414137 | <a href="#">NM_008166</a>          | <a href="#">14803</a>     | glutamate receptor, ionotropic | <a href="#">Grid1</a>              | 0.996 | 0.259  | 0.803111 | 0.920071 |
| 9164 | 10533703 | <a href="#">NM_025438</a>          | <a href="#">208606</a>    | arginine/serine-rich coiled-co | <a href="#">Rsrc2</a>              | 0.996 | -0.275 | 0.79124  | 0.915056 |
| 9165 | 10416753 | <a href="#">NM_029320</a>          | <a href="#">52023</a>     | progesterone immunomodulatory  | <a href="#">Pibf1</a>              | 0.996 | -0.255 | 0.805672 | 0.921565 |
| 9166 | 10449315 | <a href="#">BC030629</a>           | <a href="#">67267</a>     | RIKEN cDNA 2900010M23 gene     | <a href="#">2900010M23Rik</a>      | 0.996 | -0.682 | 0.516793 | 0.756112 |
| 9167 | 10498990 | <a href="#">ENSMUST00000047876</a> | <a href="#">100038599</a> | predicted gene, ENSMUSG0000007 | <a href="#">ENSMUSG00000074517</a> | 0.996 | 0.045  | 0.965416 | 0.986124 |
| 9168 | 10405495 | <a href="#">NM_146045</a>          | <a href="#">218271</a>    | xylosylprotein beta1,4-galacto | <a href="#">B4galt7</a>            | 0.996 | -0.366 | 0.724889 | 0.880713 |
| 9169 | 10567450 | <a href="#">BC051401</a>           | <a href="#">381917</a>    | dynein, axonemal, heavy chain  | <a href="#">Dnahc3</a>             | 0.996 | -0.142 | 0.891077 | 0.957456 |
| 9170 | 10385022 | <a href="#">BC087911</a>           | <a href="#">69306</a>     | RIKEN cDNA 1700007106 gene     | <a href="#">1700007106Rik</a>      | 0.996 | -0.222 | 0.83033  | 0.931873 |
| 9171 | 10437928 | <a href="#">BC011300</a>           | <a href="#">66086</a>     | RIKEN cDNA 0610037P05 gene     | <a href="#">0610037P05Rik</a>      | 0.996 | -0.319 | 0.759093 | 0.89915  |
| 9172 | 10361078 | <a href="#">ENSMUST00000085633</a> | <a href="#">68972</a>     | TatD DNase domain containing 3 | <a href="#">Tatdn3</a>             | 0.996 | 0.111  | 0.914842 | 0.966446 |
| 9173 | 10557631 | <a href="#">NM_145589</a>          | <a href="#">233895</a>    | proline rich 14                | <a href="#">Prr14</a>              | 0.996 | -0.423 | 0.684687 | 0.860588 |
| 9174 | 10571516 | <a href="#">XR_030892</a>          | <a href="#">622082</a>    | similar to bromodomain adja    | <a href="#">LOC622082</a>          | 0.996 | -0.031 | 0.976016 | 0.990137 |
| 9175 | 10373690 |                                    |                           |                                |                                    | 0.996 | -0.159 | 0.878078 | 0.951717 |
| 9176 | 10463229 | <a href="#">NM_177319</a>          | <a href="#">319740</a>    | zinc finger, FYVE domain conta | <a href="#">Zfyve27</a>            | 0.996 | -0.025 | 0.980698 | 0.991919 |
| 9177 | 10379736 | <a href="#">NM_183249</a>          | <a href="#">66107</a>     | RIKEN cDNA 1100001G20 gene     | <a href="#">1100001G20Rik</a>      | 0.996 | 0.489  | 0.639425 | 0.836375 |
| 9178 | 10539472 | <a href="#">NM_019542</a>          | <a href="#">56174</a>     | N-acetylglucosamine kinase     | <a href="#">Nagk</a>               | 0.996 | -0.329 | 0.751585 | 0.895256 |
| 9179 | 10602827 | <a href="#">NM_001033472</a>       | <a href="#">382252</a>    | RIKEN cDNA A830080D01 gene     | <a href="#">A830080D01Rik</a>      | 0.996 | -0.344 | 0.740815 | 0.889595 |
| 9180 | 10547837 | <a href="#">NM_013700</a>          | <a href="#">22225</a>     | ubiquitin specific peptidase 5 | <a href="#">Usp5</a>               | 0.996 | -0.452 | 0.664553 | 0.850409 |
| 9181 | 10433462 | <a href="#">NM_016881</a>          | <a href="#">54128</a>     | phosphomannomutase 2           | <a href="#">Pmm2</a>               | 0.996 | -0.453 | 0.664207 | 0.850267 |
| 9182 | 10433331 | <a href="#">NM_025839</a>          | <a href="#">66911</a>     | nudix (nucleoside diphosphate  | <a href="#">Nudt16l1</a>           | 0.996 | -0.425 | 0.683134 | 0.859827 |
| 9183 | 10497421 | <a href="#">NM_080634</a>          | <a href="#">12807</a>     | Hermansky-Pudlak syndrome 3 ho | <a href="#">Hps3</a>               | 0.996 | -0.008 | 0.994004 | 0.997702 |
| 9184 | 10545154 | <a href="#">NM_144548</a>          | <a href="#">209590</a>    | interleukin 23 receptor        | <a href="#">Il23r</a>              | 0.996 | 0.06   | 0.953873 | 0.982209 |
| 9185 | 10516296 | <a href="#">NM_146153</a>          | <a href="#">230753</a>    | thyroid hormone receptor assoc | <a href="#">Thrap3</a>             | 0.996 | -0.439 | 0.673853 | 0.855069 |
| 9186 | 10415086 | <a href="#">NM_175204</a>          | <a href="#">73902</a>     | proteasome (prosome, macropain | <a href="#">Psmb11</a>             | 0.996 | -0.038 | 0.971039 | 0.988148 |
| 9187 | 10580452 | <a href="#">NM_009172</a>          | <a href="#">20437</a>     | seven in absentia 1A           | <a href="#">Siah1a</a>             | 0.996 | -0.148 | 0.886478 | 0.955393 |
| 9188 | 10388488 | <a href="#">ENSMUST00000021207</a> | <a href="#">76566</a>     | RIKEN cDNA 1500005K14 gene     | <a href="#">1500005K14Rik</a>      | 0.996 | -0.338 | 0.745229 | 0.891643 |
| 9189 | 10383233 | <a href="#">AK173199</a>           | <a href="#">629974</a>    | ring finger protein 213        | <a href="#">Rnf213</a>             | 0.996 | 0.048  | 0.96299  | 0.985606 |
| 9190 | 10592618 | <a href="#">NM_173038</a>          | <a href="#">272589</a>    | tubulin folding cofactor E-lik | <a href="#">Tbce1</a>              | 0.996 | -0.794 | 0.452362 | 0.708922 |
| 9191 | 10400967 | <a href="#">NM_009189</a>          | <a href="#">20471</a>     | sine oculis-related homeobox 1 | <a href="#">Six1</a>               | 0.995 | -0.324 | 0.754913 | 0.896835 |
| 9192 | 10434670 | <a href="#">XR_035704</a>          | <a href="#">666421</a>    | predicted gene, EG666421       | <a href="#">EG666421</a>           | 0.995 | -0.071 | 0.945534 | 0.97847  |
| 9193 | 10574934 | <a href="#">NM_175024</a>          | <a href="#">234700</a>    | neuritin 1-like                | <a href="#">Nrn1l</a>              | 0.995 | 0.33   | 0.750432 | 0.894477 |
| 9194 | 10358921 | <a href="#">NM_178243</a>          | <a href="#">240817</a>    | RIKEN cDNA 5830403L16 gene     | <a href="#">5830403L16Rik</a>      | 0.995 | 0.14   | 0.89268  | 0.957773 |
| 9195 | 10446833 | <a href="#">NM_007566</a>          | <a href="#">12211</a>     | baculoviral IAP repeat-contain | <a href="#">Birc6</a>              | 0.995 | -0.104 | 0.919792 | 0.967952 |
| 9196 | 10453451 | <a href="#">NM_007589</a>          | <a href="#">12314</a>     | calmodulin 2                   | <a href="#">Calm2</a>              | 0.995 | -0.02  | 0.984546 | 0.993473 |
| 9197 | 10458956 |                                    |                           |                                |                                    | 0.995 | -0.033 | 0.974243 | 0.989025 |
| 9198 | 10421749 | <a href="#">ENSMUST00000022593</a> | <a href="#">219181</a>    | A kinase (PRKA) anchor protein | <a href="#">Akap11</a>             | 0.995 | -0.106 | 0.918648 | 0.967805 |
| 9199 | 10447691 | <a href="#">AK043779</a>           | <a href="#">75060</a>     | RIKEN cDNA 4930506C21 gene     | <a href="#">4930506C21Rik</a>      | 0.995 | -0.215 | 0.835951 | 0.933525 |
| 9200 | 10359282 | <a href="#">NM_001085376</a>       | <a href="#">23850</a>     | pappalysin 2                   | <a href="#">Pappa2</a>             | 0.995 | 0.045  | 0.96531  | 0.986124 |
| 9201 | 10444223 | <a href="#">NM_008206</a>          | <a href="#">15001</a>     | histocompatibility 2, O region | <a href="#">H2-Oa</a>              | 0.995 | -0.388 | 0.709074 | 0.872707 |
| 9202 | 10569335 | <a href="#">NR_001592</a>          | <a href="#">14955</a>     | H19 fetal liver mRNA           | <a href="#">H19</a>                | 0.995 | -0.1   | 0.922887 | 0.969148 |
| 9203 | 10366337 | <a href="#">NM_015781</a>          | <a href="#">53605</a>     | nucleosome assembly protein 1- | <a href="#">Nap11l</a>             | 0.995 | -0.205 | 0.843014 | 0.936367 |
| 9204 | 10462127 | <a href="#">ENSMUST00000025731</a> | <a href="#">75521</a>     | RIKEN cDNA 1700021P04 gene     | <a href="#">1700021P04Rik</a>      | 0.995 | 0.745  | 0.480081 | 0.729941 |
| 9205 | 10488185 | <a href="#">NM_009751</a>          | <a href="#">12075</a>     | beaded filament structural pro | <a href="#">Bfsp1</a>              | 0.995 | 0.215  | 0.835437 | 0.933323 |
| 9206 | 10454483 | <a href="#">NM_028866</a>          | <a href="#">74320</a>     | WD repeat domain 33            | <a href="#">Wdr33</a>              | 0.995 | -0.213 | 0.837461 | 0.934421 |
| 9207 | 10425653 | <a href="#">AK132940</a>           | <a href="#">328573</a>    | RIKEN cDNA 4930407I10 gene     | <a href="#">4930407I10Rik</a>      | 0.995 | 0.006  | 0.995728 | 0.998271 |

|      |          |                                    |                           |                                   |                                    |       |        |          |          |
|------|----------|------------------------------------|---------------------------|-----------------------------------|------------------------------------|-------|--------|----------|----------|
| 9208 | 10472707 | <a href="#">NM_008077</a>          | <a href="#">14415</a>     | glutamic acid decarboxylase 1     | <a href="#">Gad1</a>               | 0.995 | 0.101  | 0.922156 | 0.968977 |
| 9209 | 10455602 | <a href="#">NM_001081371</a>       | <a href="#">240283</a>    | Dmx-like 1                        | <a href="#">Dmx1l</a>              | 0.995 | -0.275 | 0.790868 | 0.914727 |
| 9210 | 10380238 | <a href="#">NM_024174</a>          | <a href="#">64656</a>     | mitochondrial ribosomal protei    | <a href="#">Mrps23</a>             | 0.995 | -0.384 | 0.712194 | 0.873926 |
| 9211 | 10525506 | <a href="#">NM_026000</a>          | <a href="#">67151</a>     | proteasome (prosome, macropain    | <a href="#">Psmc9</a>              | 0.995 | -0.058 | 0.955004 | 0.982833 |
| 9212 | 10496789 | <a href="#">NM_022983</a>          | <a href="#">65086</a>     | lysophosphatidic acid receptor    | <a href="#">Lpar3</a>              | 0.995 | -0.085 | 0.934212 | 0.97382  |
| 9213 | 10382998 | <a href="#">NM_001012273</a>       | <a href="#">11799</a>     | baculoviral IAP repeat-contain    | <a href="#">Birc5</a>              | 0.995 | -0.183 | 0.859687 | 0.943585 |
| 9214 | 10404439 | <a href="#">NM_011452</a>          | <a href="#">20706</a>     | serine (or cysteine) peptidase    | <a href="#">Serpinb9b</a>          | 0.995 | 0.365  | 0.725577 | 0.88115  |
| 9215 | 10477557 | <a href="#">NM_199304</a>          | <a href="#">228807</a>    | zinc finger protein 341           | <a href="#">Zfp341</a>             | 0.995 | -0.327 | 0.75261  | 0.895764 |
| 9216 | 10558661 | <a href="#">NM_146964</a>          | <a href="#">18362</a>     | olfactory receptor 61             | <a href="#">Olfr61</a>             | 0.995 | 0.269  | 0.795701 | 0.916955 |
| 9217 | 10408066 | <a href="#">NM_146541</a>          | <a href="#">258534</a>    | olfactory receptor 1361           | <a href="#">Olfr1361</a>           | 0.995 | 0.259  | 0.802624 | 0.919965 |
| 9218 | 10404686 | <a href="#">NM_007556</a>          | <a href="#">12161</a>     | bone morphogenetic protein 6      | <a href="#">Bmp6</a>               | 0.995 | -0.134 | 0.897051 | 0.95959  |
| 9219 | 10594835 | <a href="#">NM_178602</a>          | <a href="#">28015</a>     | glutamate receptor, ionotropic    | <a href="#">Grin1a</a>             | 0.995 | -0.676 | 0.52023  | 0.757767 |
| 9220 | 10396175 | <a href="#">ENSMUST00000101349</a> | <a href="#">100038476</a> | predicted gene,<br>ENSMUSG0000007 | <a href="#">ENSMUSG00000073041</a> | 0.995 | 0.004  | 0.996998 | 0.99884  |
| 9221 | 10569767 | <a href="#">NM_080461</a>          | <a href="#">140482</a>    | zinc finger protein 358           | <a href="#">Zfp358</a>             | 0.995 | -0.245 | 0.813008 | 0.924803 |
| 9222 | 10382846 | <a href="#">NR_003364</a>          | <a href="#">193217</a>    | cDNA sequence BC018473            | <a href="#">BC018473</a>           | 0.995 | 0.197  | 0.849411 | 0.939132 |
| 9223 | 10413981 | <a href="#">XM_985917</a>          | <a href="#">268729</a>    | gene model 626, (NCBI)            | <a href="#">Gm626</a>              | 0.995 | -0.141 | 0.891354 | 0.957565 |
| 9224 | 10373515 | <a href="#">NM_173733</a>          | <a href="#">211389</a>    | sulfite oxidase                   | <a href="#">Suox</a>               | 0.995 | -0.384 | 0.711847 | 0.873734 |
| 9225 | 10463361 | <a href="#">NM_183216</a>          | <a href="#">329065</a>    | stearoyl-coenzyme A desaturase    | <a href="#">Scd4</a>               | 0.995 | 0.15   | 0.88495  | 0.954857 |
| 9226 | 10479510 | <a href="#">ENSMUST00000094214</a> | <a href="#">320800</a>    | RIKEN cDNA 9230112E08 gene        | <a href="#">9230112E08Rik</a>      | 0.995 | 0.072  | 0.944816 | 0.978171 |
| 9227 | 10420483 | <a href="#">NM_172603</a>          | <a href="#">219131</a>    | PHD finger protein 11             | <a href="#">Phf11</a>              | 0.995 | 0.561  | 0.59165  | 0.806879 |
| 9228 | 10459089 | <a href="#">NM_008306</a>          | <a href="#">15531</a>     | N-deacetylase/N-sulfotransfera    | <a href="#">Ndst1</a>              | 0.995 | -0.407 | 0.696002 | 0.866441 |
| 9229 | 10354432 | <a href="#">NM_010863</a>          | <a href="#">17912</a>     | myosin IB                         | <a href="#">Myo1b</a>              | 0.995 | -0.066 | 0.949469 | 0.98056  |
| 9230 | 10408227 | <a href="#">NM_010424</a>          | <a href="#">15216</a>     | hemochromatosis                   | <a href="#">Hfe</a>                | 0.995 | 0.092  | 0.929119 | 0.972108 |
| 9231 | 10389190 | <a href="#">NM_001045543</a>       | <a href="#">629303</a>    | predicted gene,<br>OTTMUSG0000000 | <a href="#">OTTMUSG00000000990</a> | 0.995 | 0.194  | 0.851667 | 0.940193 |
| 9232 | 10445909 | <a href="#">NM_020005</a>          | <a href="#">18519</a>     | p300/CBP-associated factor        | <a href="#">Pcaf</a>               | 0.995 | -0.25  | 0.809819 | 0.923213 |
| 9233 | 10575512 | <a href="#">NM_133973</a>          | <a href="#">102339</a>    | component of oligomeric golgi     | <a href="#">Cog4</a>               | 0.995 | -0.887 | 0.403741 | 0.6686   |
| 9234 | 10516241 | <a href="#">BC065047</a>           | <a href="#">215090</a>    | gene model 50, (NCBI)             | <a href="#">Gm50</a>               | 0.995 | -0.389 | 0.708644 | 0.872486 |
| 9235 | 10453082 | <a href="#">NM_144802</a>          | <a href="#">72692</a>     | heterogeneous nuclear ribonucl    | <a href="#">Hnrpl1</a>             | 0.995 | -0.16  | 0.877167 | 0.951558 |
| 9236 | 10518520 | <a href="#">NM_027873</a>          | <a href="#">71707</a>     | UbiA prenyltransferase domain     | <a href="#">Ubiad1</a>             | 0.995 | -0.399 | 0.701673 | 0.869143 |
| 9237 | 10462699 |                                    |                           |                                   |                                    | 0.995 | -0.155 | 0.881392 | 0.953061 |
| 9238 | 10364072 | <a href="#">NM_011820</a>          | <a href="#">23887</a>     | gamma-glutamyltransferase 5       | <a href="#">Ggt5</a>               | 0.995 | 0.328  | 0.75259  | 0.895764 |
| 9239 | 10451261 | <a href="#">NM_145140</a>          | <a href="#">224814</a>    | ATP-binding cassette, sub-fami    | <a href="#">Abcc10</a>             | 0.995 | -0.182 | 0.860747 | 0.943965 |
| 9240 | 10422504 | <a href="#">NM_022987</a>          | <a href="#">65100</a>     | zinc finger protein of the cer    | <a href="#">Zic5</a>               | 0.995 | -0.085 | 0.934947 | 0.974155 |
| 9241 | 10462846 | <a href="#">NM_001105201</a>       | <a href="#">546726</a>    | cytochrome P450, family 26, su    | <a href="#">Cyp26c1</a>            | 0.995 | 0.169  | 0.870368 | 0.948269 |
| 9242 | 10580897 | <a href="#">NM_027640</a>          | <a href="#">70993</a>     | RIKEN cDNA 4931432M23<br>gene     | <a href="#">4931432M23Rik</a>      | 0.995 | 0.12   | 0.907542 | 0.963723 |
| 9243 | 10577602 |                                    |                           |                                   |                                    | 0.995 | 0.042  | 0.967949 | 0.987137 |
| 9244 | 10363575 | <a href="#">NM_177372</a>          | <a href="#">327762</a>    | DNA replication helicase 2 hom    | <a href="#">Dna2</a>               | 0.995 | -0.466 | 0.654647 | 0.845294 |
| 9245 | 10452356 | <a href="#">NM_030084</a>          | <a href="#">78308</a>     | G protein-coupled receptor 108    | <a href="#">Gpr108</a>             | 0.995 | -0.455 | 0.66217  | 0.84957  |
| 9246 | 10383235 | <a href="#">BC056486</a>           | <a href="#">338371</a>    | RIKEN cDNA A730011L01<br>gene     | <a href="#">A730011L01Rik</a>      | 0.995 | -0.236 | 0.819896 | 0.928345 |
| 9247 | 10525575 | <a href="#">NM_001033461</a>       | <a href="#">381741</a>    | leucine rich repeat containing    | <a href="#">Lrrc43</a>             | 0.995 | 0.515  | 0.62211  | 0.827029 |
| 9248 | 10485514 | <a href="#">NM_016739</a>          | <a href="#">53872</a>     | cell cycle associated protein     | <a href="#">Caprin1</a>            | 0.995 | -0.237 | 0.819575 | 0.928312 |
| 9249 | 10595126 | <a href="#">NM_023605</a>          | <a href="#">71538</a>     | f-box protein 9                   | <a href="#">Fbxo9</a>              | 0.995 | -0.033 | 0.974653 | 0.989251 |
| 9250 | 10533176 | <a href="#">BC021365</a>           | <a href="#">100764</a>    | RIKEN cDNA 1110008J03 gene        | <a href="#">1110008J03Rik</a>      | 0.995 | -0.23  | 0.824716 | 0.929565 |
| 9251 | 10360147 | <a href="#">AK047216</a>           | <a href="#">100048917</a> | RIKEN cDNA B930036N10<br>gene     | <a href="#">B930036N10Rik</a>      | 0.995 | -0.016 | 0.987495 | 0.994834 |
| 9252 | 10538848 | <a href="#">XR_033973</a>          | <a href="#">100042837</a> | similar to protein (peptidyl-p    | <a href="#">LOC100042837</a>       | 0.995 | 0.11   | 0.915596 | 0.966659 |
| 9253 | 10529264 | <a href="#">NM_133903</a>          | <a href="#">100689</a>    | spondin 2, extracellular matri    | <a href="#">Spon2</a>              | 0.995 | 0.502  | 0.630295 | 0.831532 |
| 9254 | 10410460 | <a href="#">ENSMUST00000065118</a> | <a href="#">76980</a>     | RIKEN cDNA 3110006E14 gene        | <a href="#">3110006E14Rik</a>      | 0.995 | -0.029 | 0.977354 | 0.990677 |
| 9255 | 10602501 | <a href="#">NM_021523</a>          | <a href="#">59026</a>     | HECT, UBA and WWE domain<br>conta | <a href="#">Huwe1</a>              | 0.995 | -0.325 | 0.754114 | 0.896425 |
| 9256 | 10595863 | <a href="#">NM_030219</a>          | <a href="#">78911</a>     | tripartite motif-containing 42    | <a href="#">Trim42</a>             | 0.995 | 0.209  | 0.840312 | 0.93543  |
| 9257 | 10580331 | <a href="#">NM_022997</a>          | <a href="#">65114</a>     | vacuolar protein sorting 35       | <a href="#">Vps35</a>              | 0.995 | -0.444 | 0.670205 | 0.85351  |
| 9258 | 10574232 | <a href="#">NM_026452</a>          | <a href="#">67914</a>     | coenzyme Q9 homolog (yeast)       | <a href="#">Coq9</a>               | 0.995 | -0.362 | 0.727562 | 0.881884 |
| 9259 | 10420775 |                                    |                           |                                   |                                    | 0.995 | 0.283  | 0.785348 | 0.912507 |

|      |          |                                    |                           |                                |                                    |       |        |          |          |
|------|----------|------------------------------------|---------------------------|--------------------------------|------------------------------------|-------|--------|----------|----------|
| 9260 | 10595805 | <a href="#">NM_053268</a>          | <a href="#">114713</a>    | RAS p21 protein activator 2    | <a href="#">Rasa2</a>              | 0.995 | -0.07  | 0.945942 | 0.978614 |
| 9261 | 10598198 | <a href="#">NM_177389</a>          | <a href="#">338366</a>    | melanoma inhibitory activity 3 | <a href="#">Mia3</a>               | 0.995 | -0.341 | 0.742869 | 0.89053  |
| 9262 | 10487175 | <a href="#">NM_009939</a>          | <a href="#">12848</a>     | COP9 (constitutive photomorpho | <a href="#">Cops2</a>              | 0.995 | -0.162 | 0.876035 | 0.95093  |
| 9263 | 10420209 | <a href="#">NM_019820</a>          | <a href="#">56410</a>     | cerebellin 3 precursor protein | <a href="#">Cbln3</a>              | 0.995 | 0.373  | 0.720172 | 0.878163 |
| 9264 | 10598079 |                                    |                           |                                |                                    | 0.995 | -0.161 | 0.876141 | 0.950949 |
| 9265 | 10498058 | <a href="#">NM_025523</a>          | <a href="#">66377</a>     | NADH dehydrogenase (ubiquinone | <a href="#">Ndufc1</a>             | 0.995 | -0.933 | 0.380887 | 0.650316 |
| 9266 | 10493103 | <a href="#">NM_177663</a>          | <a href="#">229504</a>    | interferon stimulated exonucle | <a href="#">Isg2012</a>            | 0.995 | -0.488 | 0.640178 | 0.836894 |
| 9267 | 10425283 | <a href="#">NM_010755</a>          | <a href="#">17133</a>     | v-maf musculoaponeurotic fibro | <a href="#">Maff</a>               | 0.995 | -0.577 | 0.581446 | 0.800326 |
| 9268 | 10448755 | <a href="#">ENSMUST00000097372</a> | <a href="#">193838</a>    | essential meiotic endonuclease | <a href="#">Eme2</a>               | 0.995 | -0.212 | 0.838333 | 0.934421 |
| 9269 | 10532954 | <a href="#">ENSMUST00000112121</a> | <a href="#">109154</a>    | RIKEN cDNA 2410014A08 gene     | <a href="#">2410014A08Rik</a>      | 0.995 | -0.375 | 0.718232 | 0.876988 |
| 9270 | 10438854 | <a href="#">NM_172613</a>          | <a href="#">224079</a>    | ATPase type 13A4               | <a href="#">Atp13a4</a>            | 0.995 | 0.307  | 0.767371 | 0.903161 |
| 9271 | 10601324 | <a href="#">NM_029158</a>          | <a href="#">75064</a>     | cellular nucleic acid binding  | <a href="#">Cnbp2</a>              | 0.995 | -0.045 | 0.96512  | 0.986124 |
| 9272 | 10581246 | <a href="#">NM_177791</a>          | <a href="#">279499</a>    | potassium channel tetramerisat | <a href="#">Kctd19</a>             | 0.995 | -0.235 | 0.820883 | 0.92863  |
| 9273 | 10446084 | <a href="#">NM_172132</a>          | <a href="#">193796</a>    | jumonji domain containing 2B   | <a href="#">Jmjd2b</a>             | 0.995 | 0.299  | 0.773627 | 0.9067   |
| 9274 | 10582592 | <a href="#">NM_009606</a>          | <a href="#">11459</a>     | actin, alpha 1, skeletal muscl | <a href="#">Acta1</a>              | 0.995 | -0.707 | 0.50157  | 0.744504 |
| 9275 | 10348910 | <a href="#">NM_173772</a>          | <a href="#">241159</a>    | sialidase 4                    | <a href="#">Neu4</a>               | 0.995 | 0.291  | 0.77907  | 0.910184 |
| 9276 | 10517250 | <a href="#">NM_019578</a>          | <a href="#">56219</a>     | exostoses (multiple)-like 1    | <a href="#">Extl1</a>              | 0.995 | -0.281 | 0.786589 | 0.912923 |
| 9277 | 10345172 | <a href="#">ENSMUST00000064487</a> | <a href="#">791399</a>    | predicted gene, ENSMUSG0000005 | <a href="#">ENSMUSG00000052558</a> | 0.995 | -0.258 | 0.80351  | 0.920138 |
| 9278 | 10436972 | <a href="#">XM_487442</a>          | <a href="#">435489</a>    | predicted gene, EG435489       | <a href="#">EG435489</a>           | 0.995 | -0.008 | 0.993555 | 0.997612 |
| 9279 | 10364251 | <a href="#">NM_030262</a>          | <a href="#">80294</a>     | protein O-fucosyltransferase 2 | <a href="#">Pofut2</a>             | 0.995 | -0.598 | 0.568221 | 0.793239 |
| 9280 | 10416522 | <a href="#">NM_207652</a>          | <a href="#">21807</a>     | TSC22 domain family, member 1  | <a href="#">Tsc22d1</a>            | 0.995 | -0.621 | 0.553846 | 0.783297 |
| 9281 | 10375326 | <a href="#">ENSMUST00000061070</a> | <a href="#">70802</a>     | PWWP domain containing 2A      | <a href="#">Pwwp2a</a>             | 0.994 | -0.436 | 0.675889 | 0.855911 |
| 9282 | 10533687 | <a href="#">NM_027494</a>          | <a href="#">70650</a>     | zinc finger, CCHC domain conta | <a href="#">Zcchc8</a>             | 0.994 | -0.009 | 0.993177 | 0.997422 |
| 9283 | 10466075 | <a href="#">NM_133804</a>          | <a href="#">98170</a>     | transmembrane protein 132A     | <a href="#">Tmem132a</a>           | 0.994 | -0.228 | 0.825876 | 0.929952 |
| 9284 | 10432677 | <a href="#">XM_001479184</a>       | <a href="#">668225</a>    | predicted gene, EG668225       | <a href="#">EG668225</a>           | 0.994 | -0.172 | 0.867946 | 0.947144 |
| 9285 | 10559504 | <a href="#">NM_175529</a>          | <a href="#">243813</a>    | leukocyte receptor cluster (LR | <a href="#">Leng9</a>              | 0.994 | 0.025  | 0.980467 | 0.991919 |
| 9286 | 10456798 | <a href="#">NM_029826</a>          | <a href="#">76987</a>     | haloacid dehalogenase-like hyd | <a href="#">Hdhd2</a>              | 0.994 | -0.353 | 0.73453  | 0.886568 |
| 9287 | 10350128 | <a href="#">ENSMUST00000067468</a> | <a href="#">215714</a>    | predicted gene, EG215714       | <a href="#">EG215714</a>           | 0.994 | 0.288  | 0.781807 | 0.911385 |
| 9288 | 10406626 | <a href="#">NM_147176</a>          | <a href="#">26556</a>     | homer homolog 1 (Drosophila)   | <a href="#">Homer1</a>             | 0.994 | -0.206 | 0.842244 | 0.936059 |
| 9289 | 10512226 | <a href="#">NM_026893</a>          | <a href="#">68970</a>     | WD repeat domain 40A           | <a href="#">Wdr40a</a>             | 0.994 | -0.268 | 0.796095 | 0.91721  |
| 9290 | 10538545 | <a href="#">ENSMUST00000087544</a> | <a href="#">100038736</a> | predicted gene, ENSMUSG0000006 | <a href="#">ENSMUSG00000067371</a> | 0.994 | 0.247  | 0.811729 | 0.923946 |
| 9291 | 10450735 | <a href="#">NM_008208</a>          | <a href="#">15043</a>     | histocompatibility 2, T region | <a href="#">H2-T3</a>              | 0.994 | -0.262 | 0.800774 | 0.919467 |
| 9292 | 10517009 | <a href="#">NM_031393</a>          | <a href="#">269589</a>    | synaptotagmin-like 1           | <a href="#">Sytl1</a>              | 0.994 | -0.024 | 0.981533 | 0.992092 |
| 9293 | 10386352 | <a href="#">NM_080454</a>          | <a href="#">118454</a>    | gap junction protein, gamma 2  | <a href="#">Gjc2</a>               | 0.994 | 0.227  | 0.826954 | 0.930622 |
| 9294 | 10382096 | <a href="#">ENSMUST00000009354</a> | <a href="#">75573</a>     | RIKEN cDNA 2310007L24 gene     | <a href="#">2310007L24Rik</a>      | 0.994 | -0.014 | 0.989477 | 0.995361 |
| 9295 | 10413502 | <a href="#">NM_027493</a>          | <a href="#">56249</a>     | ARP8 actin-related protein 8 h | <a href="#">Actr8</a>              | 0.994 | -0.742 | 0.481298 | 0.730704 |
| 9296 | 10527801 | <a href="#">NM_001081001</a>       | <a href="#">12190</a>     | breast cancer 2                | <a href="#">Brca2</a>              | 0.994 | -0.274 | 0.792008 | 0.915332 |
| 9297 | 10576538 | <a href="#">NM_174854</a>          | <a href="#">244667</a>    | disrupted in schizophrenia 1   | <a href="#">Disc1</a>              | 0.994 | 0.109  | 0.915948 | 0.966745 |
| 9298 | 10345706 | <a href="#">BC049091</a>           | <a href="#">52846</a>     | DNA segment, Chr 1, Brigham &  | <a href="#">D1Bwg0212e</a>         | 0.994 | -0.449 | 0.666574 | 0.851355 |
| 9299 | 10409526 | <a href="#">BC025483</a>           | <a href="#">212483</a>    | cDNA sequence BC021381         | <a href="#">BC021381</a>           | 0.994 | 0.077  | 0.94077  | 0.977    |
| 9300 | 10560993 | <a href="#">NM_001031667</a>       | <a href="#">606496</a>    | glycogen synthase kinase 3 alp | <a href="#">Gsk3a</a>              | 0.994 | -0.225 | 0.828244 | 0.930848 |
| 9301 | 10581902 | <a href="#">NM_011801</a>          | <a href="#">23837</a>     | craniofacial development prote | <a href="#">Cfdp1</a>              | 0.994 | -0.205 | 0.843167 | 0.93639  |
| 9302 | 10477042 | <a href="#">NM_009641</a>          | <a href="#">11602</a>     | angiopoietin 4                 | <a href="#">Angpt4</a>             | 0.994 | 0.04   | 0.968878 | 0.987519 |
| 9303 | 10558090 | <a href="#">NM_001004468</a>       | <a href="#">57752</a>     | transforming, acidic coiled-co | <a href="#">Tacc2</a>              | 0.994 | -0.474 | 0.649262 | 0.842415 |
| 9304 | 10497169 | <a href="#">XR_030720</a>          | <a href="#">620283</a>    | similar to mCBP                | <a href="#">LOC620283</a>          | 0.994 | -0.116 | 0.910501 | 0.964214 |
| 9305 | 10596568 | <a href="#">ENSMUST00000098424</a> | <a href="#">109095</a>    | RNA binding motif protein 15B  | <a href="#">Rbm15b</a>             | 0.994 | -0.383 | 0.712421 | 0.874053 |
| 9306 | 10427083 | <a href="#">NM_145625</a>          | <a href="#">75705</a>     | eukaryotic translation initiat | <a href="#">Eif4b</a>              | 0.994 | -0.413 | 0.691309 | 0.864541 |
| 9307 | 10389617 | <a href="#">NM_177167</a>          | <a href="#">320472</a>    | protein phosphatase 1E (PP2C d | <a href="#">Ppm1e</a>              | 0.994 | -0.176 | 0.864924 | 0.946153 |
| 9308 | 10425905 | <a href="#">NM_016714</a>          | <a href="#">18141</a>     | nucleoporin 50                 | <a href="#">Nup50</a>              | 0.994 | -0.514 | 0.622834 | 0.827402 |
| 9309 | 10586616 | <a href="#">NM_177184</a>          | <a href="#">320528</a>    | vacuolar protein sorting 13C ( | <a href="#">Vps13c</a>             | 0.994 | -0.271 | 0.79382  | 0.91617  |
| 9310 | 10570189 | <a href="#">NM_009233</a>          | <a href="#">20664</a>     | SRY-box containing gene 1      | <a href="#">Sox1</a>               | 0.994 | -0.871 | 0.411974 | 0.67583  |
| 9311 | 10430647 |                                    |                           |                                |                                    | 0.994 | -0.14  | 0.892241 | 0.957739 |

|      |          |                                    |                        |                                   |                                    |       |        |          |          |
|------|----------|------------------------------------|------------------------|-----------------------------------|------------------------------------|-------|--------|----------|----------|
| 9312 | 10505630 | <a href="#">NM_029949</a>          | <a href="#">77634</a>  | small nuclear RNA activating c    | <a href="#">Snapc3</a>             | 0.994 | -0.547 | 0.60059  | 0.812284 |
| 9313 | 10453485 |                                    |                        |                                   |                                    | 0.994 | 0.409  | 0.694441 | 0.865758 |
| 9314 | 10398929 | <a href="#">NM_201646</a>          | <a href="#">399566</a> | BTB (POZ) domain containing 6     | <a href="#">Btbd6</a>              | 0.994 | 0.019  | 0.985563 | 0.993996 |
| 9315 | 10448376 | <a href="#">NM_029798</a>          | <a href="#">76917</a>  | FLYWCH family member 2            | <a href="#">Flywch2</a>            | 0.994 | -1.272 | 0.242979 | 0.51587  |
| 9316 | 10466970 | <a href="#">ENSMUST00000061906</a> | <a href="#">553138</a> | predicted gene,<br>ENSMUSG0000004 | <a href="#">ENSMUSG00000048936</a> | 0.994 | -0.179 | 0.862987 | 0.945293 |
| 9317 | 10552725 | <a href="#">NM_133945</a>          | <a href="#">101568</a> | vaccinia related kinase 3         | <a href="#">Vrk3</a>               | 0.994 | -0.542 | 0.604322 | 0.815222 |
| 9318 | 10567578 |                                    |                        |                                   |                                    | 0.994 | 0.61   | 0.560319 | 0.787568 |
| 9319 | 10566698 | <a href="#">NM_146726</a>          | <a href="#">258721</a> | olfactory receptor 514            | <a href="#">Olfir514</a>           | 0.994 | 0.073  | 0.94345  | 0.977948 |
| 9320 | 10365145 | <a href="#">NM_019725</a>          | <a href="#">21886</a>  | transducin-like enhancer of sp    | <a href="#">Tle2</a>               | 0.994 | 0.325  | 0.754716 | 0.896801 |
| 9321 | 10561017 | <a href="#">NM_008776</a>          | <a href="#">18476</a>  | platelet-activating factor ace    | <a href="#">Pafah1b3</a>           | 0.994 | -0.918 | 0.388189 | 0.656892 |
| 9322 | 10565609 | <a href="#">NM_009381</a>          | <a href="#">21835</a>  | thyroid hormone responsive SPO    | <a href="#">Thrsp</a>              | 0.994 | -0.11  | 0.915079 | 0.9666   |
| 9323 | 10387559 | <a href="#">NM_030702</a>          | <a href="#">80886</a>  | SUMO/sentrin specific peptidas    | <a href="#">Semp3</a>              | 0.994 | -0.448 | 0.667185 | 0.851407 |
| 9324 | 10399254 | <a href="#">NM_134046</a>          | <a href="#">52504</a>  | centromere protein O              | <a href="#">Cenpo</a>              | 0.994 | -0.503 | 0.62967  | 0.831325 |
| 9325 | 10528567 | <a href="#">NM_001002897</a>       | <a href="#">213948</a> | ATG9 autophagy related 9<br>homol | <a href="#">Atg9b</a>              | 0.994 | -0.045 | 0.965182 | 0.986124 |
| 9326 | 10471833 | <a href="#">NM_010710</a>          | <a href="#">16870</a>  | LIM homeobox protein 2            | <a href="#">Lhx2</a>               | 0.994 | -0.093 | 0.928402 | 0.971746 |
| 9327 | 10425527 | <a href="#">NM_177821</a>          | <a href="#">328572</a> | E1A binding protein p300          | <a href="#">Ep300</a>              | 0.994 | -0.405 | 0.697503 | 0.867333 |
| 9328 | 10508112 | <a href="#">NM_138721</a>          | <a href="#">116748</a> | U7 snRNP-specific Sm-like prot    | <a href="#">Lsm10</a>              | 0.994 | -0.316 | 0.760897 | 0.900252 |
| 9329 | 10554325 | <a href="#">NM_029835</a>          | <a href="#">77011</a>  | RIKEN cDNA 5730590G19<br>gene     | <a href="#">5730590G19Rik</a>      | 0.994 | -0.598 | 0.568423 | 0.793239 |
| 9330 | 10408062 | <a href="#">NM_146744</a>          | <a href="#">258739</a> | olfactory receptor 1362           | <a href="#">Olfir1362</a>          | 0.994 | -0.104 | 0.920291 | 0.968139 |
| 9331 | 10607124 | <a href="#">NM_001114385</a>       | <a href="#">83453</a>  | chordin-like 1                    | <a href="#">Chrd11</a>             | 0.994 | -0.53  | 0.611932 | 0.820046 |
| 9332 | 10507826 | <a href="#">NM_174998</a>          | <a href="#">170638</a> | hippocalcin-like 4                | <a href="#">Hpcal4</a>             | 0.994 | -0.164 | 0.874323 | 0.949978 |
| 9333 | 10482229 | <a href="#">NM_011187</a>          | <a href="#">19177</a>  | proteasome (prosome, macropain)   | <a href="#">Psmb7</a>              | 0.994 | -0.424 | 0.684048 | 0.860099 |
| 9334 | 10570738 |                                    |                        |                                   |                                    | 0.994 | 0.112  | 0.914259 | 0.966149 |
| 9335 | 10430711 | <a href="#">NM_011399</a>          | <a href="#">20524</a>  | solute carrier family 25 (mito    | <a href="#">Slc25a17</a>           | 0.994 | -0.933 | 0.380871 | 0.650316 |
| 9336 | 10581132 | <a href="#">NM_007663</a>          | <a href="#">12556</a>  | cadherin 16                       | <a href="#">Cdh16</a>              | 0.994 | -0.381 | 0.713985 | 0.874805 |
| 9337 | 10410641 | <a href="#">ENSMUST00000022064</a> | <a href="#">432779</a> | expressed sequence AI595366       | <a href="#">AI595366</a>           | 0.994 | 0.218  | 0.833593 | 0.932911 |
| 9338 | 10368762 | <a href="#">BC061220</a>           | <a href="#">71713</a>  | cell division cycle 40 homolog    | <a href="#">Cdc40</a>              | 0.994 | -0.349 | 0.737226 | 0.887888 |
| 9339 | 10547322 | <a href="#">NM_009781</a>          | <a href="#">12288</a>  | calcium channel, voltage-depen    | <a href="#">Cacla1c</a>            | 0.994 | -0.074 | 0.942825 | 0.977825 |
| 9340 | 10563615 | <a href="#">NM_001005247</a>       | <a href="#">246694</a> | Hermansky-Pudlak syndrome 5<br>ho | <a href="#">Hps5</a>               | 0.994 | 0.018  | 0.986315 | 0.994262 |
| 9341 | 10507908 | <a href="#">NM_010213</a>          | <a href="#">14201</a>  | four and a half LIM domains 3     | <a href="#">Fhl3</a>               | 0.994 | 0.065  | 0.950292 | 0.980767 |
| 9342 | 10580137 |                                    |                        |                                   |                                    | 0.994 | 0.074  | 0.942886 | 0.977825 |
| 9343 | 10569441 | <a href="#">NM_008672</a>          | <a href="#">17955</a>  | nucleosome assembly protein 1-    | <a href="#">Nap114</a>             | 0.994 | -0.559 | 0.592871 | 0.807502 |
| 9344 | 10591263 | <a href="#">NM_001002846</a>       | <a href="#">30843</a>  | F-box and leucine-rich repeat     | <a href="#">Fbx112</a>             | 0.994 | -0.129 | 0.901212 | 0.961171 |
| 9345 | 10427222 | <a href="#">NM_144547</a>          | <a href="#">110542</a> | anti-Mullerian hormone type 2     | <a href="#">Amhr2</a>              | 0.994 | 0.267  | 0.796901 | 0.917479 |
| 9346 | 10455199 | <a href="#">NM_153793</a>          | <a href="#">225392</a> | RELT-like 2                       | <a href="#">Rel2</a>               | 0.994 | -0.041 | 0.968504 | 0.987362 |
| 9347 | 10544660 | <a href="#">NM_027881</a>          | <a href="#">71720</a>  | oxysterol binding protein-like    | <a href="#">Osbp13</a>             | 0.994 | -0.039 | 0.969793 | 0.987731 |
| 9348 | 10425757 | <a href="#">BC092006</a>           | <a href="#">69029</a>  | RIKEN cDNA 1500032L24 gene        | <a href="#">1500032L24Rik</a>      | 0.994 | -0.271 | 0.793749 | 0.916154 |
| 9349 | 10558707 | <a href="#">NM_053194</a>          | <a href="#">101489</a> | resistance to inhibitors of ch    | <a href="#">Ric8</a>               | 0.994 | -0.728 | 0.489319 | 0.736434 |
| 9350 | 10438904 | <a href="#">NM_028973</a>          | <a href="#">74488</a>  | leucine rich repeat containing    | <a href="#">Lrrc15</a>             | 0.994 | 0.245  | 0.813251 | 0.9249   |
| 9351 | 10418812 | <a href="#">BC107222</a>           | <a href="#">67085</a>  | RIKEN cDNA 1700024G13<br>gene     | <a href="#">1700024G13Rik</a>      | 0.994 | 0.387  | 0.70999  | 0.873031 |
| 9352 | 10455019 | <a href="#">NM_007766</a>          | <a href="#">12936</a>  | protocadherin alpha 4             | <a href="#">Pcdha4</a>             | 0.994 | -0.304 | 0.769471 | 0.904525 |
| 9353 | 10596810 | <a href="#">AK029954</a>           | <a href="#">19654</a>  | RNA binding motif protein 6       | <a href="#">Rbm6</a>               | 0.994 | -0.143 | 0.890124 | 0.956731 |
| 9354 | 10550316 | <a href="#">NM_026938</a>          | <a href="#">69094</a>  | transmembrane protein 160         | <a href="#">Tmem160</a>            | 0.993 | -0.378 | 0.71657  | 0.875798 |
| 9355 | 10379820 | <a href="#">NM_133360</a>          | <a href="#">107476</a> | acetyl-Coenzyme A carboxylase     | <a href="#">Acaca</a>              | 0.993 | -0.044 | 0.965747 | 0.986319 |
| 9356 | 10372407 |                                    |                        |                                   |                                    | 0.993 | -0.179 | 0.863155 | 0.945375 |
| 9357 | 10471036 | <a href="#">NM_020329</a>          | <a href="#">57170</a>  | dolichyl pyrophosphate phospho    | <a href="#">Dolpp1</a>             | 0.993 | -0.131 | 0.899047 | 0.960129 |
| 9358 | 10409970 | <a href="#">NM_178875</a>          | <a href="#">71508</a>  | RIKEN cDNA 8430426H19<br>gene     | <a href="#">8430426H19Rik</a>      | 0.993 | -0.404 | 0.698059 | 0.867716 |
| 9359 | 10528583 | <a href="#">NM_007668</a>          | <a href="#">12568</a>  | cyclin-dependent kinase 5         | <a href="#">Cdk5</a>               | 0.993 | -0.633 | 0.546448 | 0.777695 |
| 9360 | 10349345 | <a href="#">NM_010133</a>          | <a href="#">13798</a>  | engrailed 1                       | <a href="#">En1</a>                | 0.993 | -0.077 | 0.940486 | 0.976893 |
| 9361 | 10382848 | <a href="#">BC026936</a>           | <a href="#">74319</a>  | RIKEN cDNA 1110005A03<br>gene     | <a href="#">1110005A03Rik</a>      | 0.993 | -0.075 | 0.942274 | 0.977825 |
| 9362 | 10529700 | <a href="#">AK041707</a>           | <a href="#">701401</a> | predicted gene,                   | <a href="#">ENSMUSG00000054482</a> | 0.993 | 0.126  | 0.903147 | 0.962265 |

|      |          |                                    |                           |                                   |                                    |       |        |          |          |
|------|----------|------------------------------------|---------------------------|-----------------------------------|------------------------------------|-------|--------|----------|----------|
| 9362 | 10327177 | <a href="#">AK041171</a>           | <a href="#">121491</a>    | ENSMUSG0000005                    | <a href="#">ENSMUSG0000005446</a>  | 0.993 | 0.120  | 0.503147 | 0.902203 |
| 9363 | 10376263 | <a href="#">NM_145426</a>          | <a href="#">216760</a>    | microfibrillar-associated prot    | <a href="#">Mfap3</a>              | 0.993 | -0.63  | 0.547875 | 0.778543 |
| 9364 | 10371230 | <a href="#">NM_010301</a>          | <a href="#">14672</a>     | guanine nucleotide binding pro    | <a href="#">Gna11</a>              | 0.993 | -1.138 | 0.291517 | 0.567624 |
| 9365 | 10380417 |                                    |                           |                                   |                                    | 0.993 | 0.028  | 0.978115 | 0.991187 |
| 9366 | 10352393 | <a href="#">NM_012058</a>          | <a href="#">27058</a>     | signal recognition particle 9     | <a href="#">Srp9</a>               | 0.993 | 0.133  | 0.897831 | 0.959787 |
| 9367 | 10498775 | <a href="#">NM_175193</a>          | <a href="#">73124</a>     | golgi integral membrane protei    | <a href="#">Golim4</a>             | 0.993 | -0.293 | 0.777895 | 0.909621 |
| 9368 | 10512411 | <a href="#">NM_053081</a>          | <a href="#">60534</a>     | Fanconi anemia, complementatio    | <a href="#">Fancg</a>              | 0.993 | -0.104 | 0.920044 | 0.968088 |
| 9369 | 10448694 | <a href="#">NM_011522</a>          | <a href="#">20974</a>     | synaptogyrin 3                    | <a href="#">Syngr3</a>             | 0.993 | 0.309  | 0.765834 | 0.902563 |
| 9370 | 10459999 | <a href="#">NM_178280</a>          | <a href="#">20689</a>     | sal-like 3 (Drosophila)           | <a href="#">Sall3</a>              | 0.993 | 0.208  | 0.841171 | 0.935777 |
| 9371 | 10561004 | <a href="#">NM_010155</a>          | <a href="#">13875</a>     | Ets2 repressor factor             | <a href="#">Erf</a>                | 0.993 | -0.672 | 0.522749 | 0.759448 |
| 9372 | 10435963 | <a href="#">NM_026402</a>          | <a href="#">67841</a>     | autophagy-related 3 (yeast)       | <a href="#">Atg3</a>               | 0.993 | -0.515 | 0.622162 | 0.827046 |
| 9373 | 10451451 | <a href="#">NM_010321</a>          | <a href="#">14711</a>     | glycine N-methyltransferase       | <a href="#">Gnmt</a>               | 0.993 | 0.325  | 0.754565 | 0.896724 |
| 9374 | 10407141 | <a href="#">NM_175497</a>          | <a href="#">238880</a>    | actin, beta-like 2                | <a href="#">Actb12</a>             | 0.993 | 0.407  | 0.695585 | 0.866211 |
| 9375 | 10463242 | <a href="#">BC049116</a>           | <a href="#">71146</a>     | RIKEN cDNA 4933417O08 gene        | <a href="#">4933417O08Rik</a>      | 0.993 | -0.036 | 0.9724   | 0.98815  |
| 9376 | 10516229 | <a href="#">NM_026031</a>          | <a href="#">67205</a>     | UTP11-like, U3 small nucleolar    | <a href="#">Utp11</a>              | 0.993 | -0.253 | 0.807697 | 0.922567 |
| 9377 | 10393453 | <a href="#">ENSMUST00000084803</a> | <a href="#">69926</a>     | dynein, axonemal, heavy chain     | <a href="#">Dnahc17</a>            | 0.993 | 0.001  | 0.999326 | 0.999589 |
| 9378 | 10528864 | <a href="#">NM_175651</a>          | <a href="#">269637</a>    | canopy 1 homolog (zebrafish)      | <a href="#">Cnpy1</a>              | 0.993 | 0.175  | 0.86553  | 0.946261 |
| 9379 | 10593418 | <a href="#">NM_024441</a>          | <a href="#">69253</a>     | heat shock protein 2              | <a href="#">Hspb2</a>              | 0.993 | -0.065 | 0.949953 | 0.980663 |
| 9380 | 10502686 | <a href="#">NM_019957</a>          | <a href="#">56629</a>     | deoxyribonuclease II beta         | <a href="#">Dnase2b</a>            | 0.993 | -0.072 | 0.944243 | 0.977948 |
| 9381 | 10518857 | <a href="#">NM_133879</a>          | <a href="#">100090</a>    | zinc finger and BTB domain con    | <a href="#">Zbtb48</a>             | 0.993 | -0.234 | 0.821574 | 0.92863  |
| 9382 | 10345879 | <a href="#">NM_008900</a>          | <a href="#">18993</a>     | POU domain, class 3, transcrip    | <a href="#">Pou3f3</a>             | 0.993 | 0.026  | 0.97996  | 0.991919 |
| 9383 | 10533401 | <a href="#">ENSMUST00000111752</a> | <a href="#">13048</a>     | cut-like homeobox 2               | <a href="#">Cux2</a>               | 0.993 | -0.381 | 0.713902 | 0.874754 |
| 9384 | 10485225 | <a href="#">NM_010163</a>          | <a href="#">14043</a>     | exostoses (multiple) 2            | <a href="#">Ext2</a>               | 0.993 | -0.507 | 0.627143 | 0.830395 |
| 9385 | 10587211 | <a href="#">NM_001039522</a>       | <a href="#">235497</a>    | Leo1, Paf1/RNA polymerase II c    | <a href="#">Leo1</a>               | 0.993 | -0.54  | 0.605408 | 0.815953 |
| 9386 | 10474123 | <a href="#">NM_029635</a>          | <a href="#">76501</a>     | COMM domain containing 9          | <a href="#">Comm9</a>              | 0.993 | -0.498 | 0.633544 | 0.833323 |
| 9387 | 10574141 |                                    |                           |                                   |                                    | 0.993 | 0.289  | 0.780554 | 0.910911 |
| 9388 | 10478926 | <a href="#">ENSMUST00000077067</a> | <a href="#">619302</a>    | RIKEN cDNA 1700101G07 gene        | <a href="#">1700101G07Rik</a>      | 0.993 | -0.087 | 0.933149 | 0.973336 |
| 9389 | 10572779 | <a href="#">NM_026455</a>          | <a href="#">67922</a>     | RIKEN cDNA 2510049I19 gene        | <a href="#">2510049I19Rik</a>      | 0.993 | -0.183 | 0.859885 | 0.943624 |
| 9390 | 10534537 | <a href="#">ENSMUST00000111153</a> | <a href="#">109267</a>    | scavenger receptor cysteine ri    | <a href="#">Srcrb4d</a>            | 0.993 | -0.089 | 0.931191 | 0.972759 |
| 9391 | 10584615 | <a href="#">NM_021424</a>          | <a href="#">58235</a>     | poliovirus receptor-related 1     | <a href="#">Pvr1</a>               | 0.993 | -0.278 | 0.788676 | 0.91399  |
| 9392 | 10523516 | <a href="#">ENSMUST00000046721</a> | <a href="#">75129</a>     | RIKEN cDNA 4930524J08 gene        | <a href="#">4930524J08Rik</a>      | 0.993 | -0.47  | 0.652275 | 0.844168 |
| 9393 | 10360028 | <a href="#">NM_001077189</a>       | <a href="#">14130</a>     | Fc receptor, IgG, low affinity    | <a href="#">Fcgr2b</a>             | 0.993 | -0.027 | 0.979305 | 0.991782 |
| 9394 | 10434808 | <a href="#">NM_175165</a>          | <a href="#">71338</a>     | transformation related protein    | <a href="#">Tprg</a>               | 0.993 | -0.02  | 0.984483 | 0.993457 |
| 9395 | 10604599 |                                    |                           |                                   |                                    | 0.993 | -0.095 | 0.927108 | 0.971253 |
| 9396 | 10577125 | <a href="#">NM_172750</a>          | <a href="#">234072</a>    | ADP-ribosylhydrolase like 1       | <a href="#">Adprh1</a>             | 0.993 | 0.285  | 0.783312 | 0.911971 |
| 9397 | 10352066 | <a href="#">NM_029756</a>          | <a href="#">76816</a>     | serologically defined colon ca    | <a href="#">Sdccag8</a>            | 0.993 | -0.131 | 0.899651 | 0.960245 |
| 9398 | 10480477 | <a href="#">NM_011040</a>          | <a href="#">18510</a>     | paired box gene 8                 | <a href="#">Pax8</a>               | 0.993 | -0.235 | 0.820845 | 0.92863  |
| 9399 | 10581378 | <a href="#">NM_013640</a>          | <a href="#">19171</a>     | proteasome (prosome, macropain    | <a href="#">Psmb10</a>             | 0.993 | -0.888 | 0.40316  | 0.668374 |
| 9400 | 10584524 | <a href="#">XR_001606</a>          | <a href="#">72224</a>     | RIKEN cDNA 1700001J11 gene        | <a href="#">1700001J11Rik</a>      | 0.993 | 0.598  | 0.568316 | 0.793239 |
| 9401 | 10438527 | <a href="#">NM_028420</a>          | <a href="#">73047</a>     | calcium/calmodulin-dependent p    | <a href="#">Camk2n2</a>            | 0.993 | -0.515 | 0.622239 | 0.827079 |
| 9402 | 10407467 | <a href="#">NM_018859</a>          | <a href="#">56043</a>     | aldo-keto reductase family 1,     | <a href="#">Akr1e1</a>             | 0.993 | -0.038 | 0.970687 | 0.988127 |
| 9403 | 10570741 | <a href="#">NM_007843</a>          | <a href="#">13214</a>     | defensin beta 1                   | <a href="#">Defb1</a>              | 0.993 | 0.329  | 0.751769 | 0.895263 |
| 9404 | 10375307 | <a href="#">NM_026979</a>          | <a href="#">69183</a>     | C1q and tumor necrosis factor     | <a href="#">C1qtnf2</a>            | 0.993 | -0.204 | 0.844016 | 0.936644 |
| 9405 | 10359078 |                                    |                           |                                   |                                    | 0.993 | -0.085 | 0.934304 | 0.97382  |
| 9406 | 10589464 | <a href="#">ENSMUST00000098355</a> | <a href="#">100038739</a> | predicted gene,<br>ENSMUSG0000007 | <a href="#">ENSMUSG00000074056</a> | 0.993 | -0.023 | 0.982423 | 0.9924   |
| 9407 | 10348321 | <a href="#">BC048957</a>           | <a href="#">227333</a>    | diacylglycerol kinase, delta      | <a href="#">Dgkd</a>               | 0.993 | -0.587 | 0.575071 | 0.797076 |
| 9408 | 10474381 | <a href="#">NM_139303</a>          | <a href="#">228421</a>    | kinesin family member 18A         | <a href="#">Kif18a</a>             | 0.993 | -1.24  | 0.253717 | 0.527959 |
| 9409 | 10594015 | <a href="#">NM_029212</a>          | <a href="#">382077</a>    | coiled-coil domain containing     | <a href="#">Ccdc33</a>             | 0.993 | 0.189  | 0.855269 | 0.841477 |
| 9410 | 10488195 | <a href="#">NM_024281</a>          | <a href="#">81910</a>     | ribosome binding protein 1        | <a href="#">Rbp1</a>               | 0.993 | -0.206 | 0.84234  | 0.936185 |
| 9411 | 10561854 | <a href="#">NM_025548</a>          | <a href="#">66411</a>     | tubulin folding cofactor B        | <a href="#">Tbcb</a>               | 0.993 | -0.893 | 0.400588 | 0.666392 |
| 9412 | 10534966 | <a href="#">NM_019747</a>          | <a href="#">56314</a>     | zinc finger protein 113           | <a href="#">Zfp113</a>             | 0.993 | -0.489 | 0.639691 | 0.836568 |
| 9413 | 10579600 | <a href="#">ENSMUST00000066837</a> | <a href="#">791308</a>    | predicted gene,<br>ENSMUSG0000005 | <a href="#">ENSMUSG00000054044</a> | 0.993 | 0.353  | 0.734227 | 0.886455 |
| 9414 | 10471840 |                                    |                           |                                   |                                    | 0.993 | -0.103 | 0.920534 | 0.968204 |
| 9415 | 10377662 | <a href="#">NM_016875</a>          | <a href="#">53422</a>     | Y box protein 2                   | <a href="#">Ybx2</a>               | 0.993 | -0.32  | 0.757978 | 0.898457 |

|      |          |                                    |                           |                                   |                                    |       |        |          |          |
|------|----------|------------------------------------|---------------------------|-----------------------------------|------------------------------------|-------|--------|----------|----------|
| 9416 | 10501098 | <a href="#">NM_145922</a>          | <a href="#">99738</a>     | potassium voltage gated channe    | <a href="#">Kenc4</a>              | 0.993 | 0.139  | 0.892926 | 0.957774 |
| 9417 | 10407907 | <a href="#">NM_019491</a>          | <a href="#">56044</a>     | v-ral simian leukemia viral on    | <a href="#">Rala</a>               | 0.993 | -0.563 | 0.590312 | 0.806156 |
| 9418 | 10606544 |                                    |                           |                                   |                                    | 0.993 | 0.136  | 0.895551 | 0.959003 |
| 9419 | 10356689 | <a href="#">NM_172850</a>          | <a href="#">241158</a>    | ankyrin repeat and MYND domain    | <a href="#">Ankmy1</a>             | 0.993 | -0.233 | 0.821873 | 0.92863  |
| 9420 | 10454030 | <a href="#">NM_027687</a>          | <a href="#">71132</a>     | calcium-binding tyrosine-(Y)-p    | <a href="#">Cabyr</a>              | 0.993 | -0.168 | 0.871199 | 0.948575 |
| 9421 | 10570131 | <a href="#">NM_011919</a>          | <a href="#">26356</a>     | inhibitor of growth family, me    | <a href="#">Ing1</a>               | 0.993 | -0.56  | 0.592312 | 0.807145 |
| 9422 | 10512598 | <a href="#">NM_001007463</a>       | <a href="#">433700</a>    | sperm associated antigen 8        | <a href="#">Spag8</a>              | 0.993 | -0.44  | 0.672885 | 0.854651 |
| 9423 | 10468916 | <a href="#">NM_001081161</a>       | <a href="#">269233</a>    | RIKEN cDNA 9630050M13 gene        | <a href="#">9630050M13Rik</a>      | 0.993 | -0.181 | 0.861448 | 0.944333 |
| 9424 | 10471586 | <a href="#">NM_022310</a>          | <a href="#">14828</a>     | heat shock protein 5              | <a href="#">Hspa5</a>              | 0.993 | -0.513 | 0.623177 | 0.827667 |
| 9425 | 10345895 | <a href="#">NM_053107</a>          | <a href="#">93690</a>     | G protein-coupled receptor 45     | <a href="#">Gpr45</a>              | 0.993 | -0.049 | 0.962082 | 0.985362 |
| 9426 | 10383943 | <a href="#">NM_007968</a>          | <a href="#">14030</a>     | Ewing sarcoma breakpoint regio    | <a href="#">Ewsr1</a>              | 0.993 | -0.254 | 0.806386 | 0.921832 |
| 9427 | 10383754 |                                    |                           |                                   |                                    | 0.993 | -0.328 | 0.751976 | 0.895376 |
| 9428 | 10379685 | <a href="#">NM_025492</a>          | <a href="#">66330</a>     | RIKEN cDNA 1700020L24 gene        | <a href="#">1700020L24Rik</a>      | 0.993 | 0.229  | 0.825042 | 0.92959  |
| 9429 | 10547985 | <a href="#">NM_001033126</a>       | <a href="#">21940</a>     | CD27 antigen                      | <a href="#">Cd27</a>               | 0.993 | 0.357  | 0.731014 | 0.883888 |
| 9430 | 10403511 | <a href="#">NM_144835</a>          | <a href="#">217995</a>    | HEAT repeat containing 1          | <a href="#">Heatr1</a>             | 0.993 | -0.405 | 0.697419 | 0.867333 |
| 9431 | 10534405 | <a href="#">NM_025375</a>          | <a href="#">66138</a>     | Williams Beuren syndrome chrom    | <a href="#">Wbscr22</a>            | 0.993 | -0.347 | 0.738539 | 0.88853  |
| 9432 | 10560873 | <a href="#">NM_019981</a>          | <a href="#">56746</a>     | testis expressed gene 101         | <a href="#">Tex101</a>             | 0.993 | 0.154  | 0.881888 | 0.953353 |
| 9433 | 10477630 | <a href="#">NM_025947</a>          | <a href="#">67068</a>     | dynein light chain roadblock-t    | <a href="#">Dynlrb1</a>            | 0.993 | -0.367 | 0.723992 | 0.88046  |
| 9434 | 10399189 | <a href="#">NM_177082</a>          | <a href="#">320145</a>    | trans-acting transcription fac    | <a href="#">Sp8</a>                | 0.993 | 0.168  | 0.871457 | 0.948625 |
| 9435 | 10570068 | <a href="#">NM_009932</a>          | <a href="#">12827</a>     | collagen, type IV, alpha 2        | <a href="#">Col4a2</a>             | 0.993 | 0.294  | 0.776712 | 0.908994 |
| 9436 | 10567919 | <a href="#">NM_183020</a>          | <a href="#">233871</a>    | ataxin 2-like                     | <a href="#">Atxn2l</a>             | 0.993 | -0.144 | 0.889788 | 0.956712 |
| 9437 | 10454966 | <a href="#">NM_011879</a>          | <a href="#">24010</a>     | IK cytokine                       | <a href="#">Ik</a>                 | 0.993 | -0.415 | 0.68992  | 0.863942 |
| 9438 | 10426773 | <a href="#">NM_175087</a>          | <a href="#">11831</a>     | aquaporin 6                       | <a href="#">Aqp6</a>               | 0.993 | 0.073  | 0.943985 | 0.977948 |
| 9439 | 10490053 | <a href="#">NM_001033299</a>       | <a href="#">228913</a>    | zinc finger protein 217           | <a href="#">Zfp217</a>             | 0.992 | -0.275 | 0.791168 | 0.915023 |
| 9440 | 10419999 | <a href="#">NM_177049</a>          | <a href="#">319984</a>    | junctionophilin 4                 | <a href="#">Jph4</a>               | 0.992 | 0.032  | 0.975374 | 0.989745 |
| 9441 | 10562761 | <a href="#">NM_009131</a>          | <a href="#">20256</a>     | C-type lectin domain family 11    | <a href="#">Clec11a</a>            | 0.992 | -0.134 | 0.89693  | 0.95959  |
| 9442 | 10447617 |                                    |                           |                                   |                                    | 0.992 | -0.564 | 0.590016 | 0.805977 |
| 9443 | 10382367 | <a href="#">ENSMUST00000100243</a> | <a href="#">100038601</a> | predicted gene,<br>OTTMUSG0000000 | <a href="#">OTTMUSG00000003387</a> | 0.992 | 0.21   | 0.83967  | 0.935306 |
| 9444 | 10417208 |                                    |                           |                                   |                                    | 0.992 | -0.312 | 0.764153 | 0.90173  |
| 9445 | 10442719 | <a href="#">ENSMUST00000073277</a> | <a href="#">207209</a>    | gene model 317, (NCBI)            | <a href="#">Gm317</a>              | 0.992 | 0.123  | 0.905333 | 0.963331 |
| 9446 | 10527213 | <a href="#">NM_144915</a>          | <a href="#">231871</a>    | diacylglycerol lipase, beta       | <a href="#">Daglb</a>              | 0.992 | 0.209  | 0.840038 | 0.935328 |
| 9447 | 10563101 | <a href="#">NM_009438</a>          | <a href="#">22121</a>     | ribosomal protein L13a            | <a href="#">Rpl13a</a>             | 0.992 | -0.291 | 0.77928  | 0.910287 |
| 9448 | 10581388 | <a href="#">NM_008490</a>          | <a href="#">16816</a>     | lecithin cholesterol acyltrans    | <a href="#">Lcat</a>               | 0.992 | -0.186 | 0.857229 | 0.942404 |
| 9449 | 10348087 | <a href="#">NM_172974</a>          | <a href="#">26895</a>     | COP9 (constitutive photomorpho    | <a href="#">Cops7b</a>             | 0.992 | -0.371 | 0.721305 | 0.878631 |
| 9450 | 10560919 | <a href="#">NM_144921</a>          | <a href="#">232975</a>    | ATPase, Na+/K+ transporting, a    | <a href="#">Atp1a3</a>             | 0.992 | 0.008  | 0.994061 | 0.997702 |
| 9451 | 10539665 | <a href="#">NM_012013</a>          | <a href="#">26910</a>     | folliculogenesis specific basi    | <a href="#">Figla</a>              | 0.992 | -0.315 | 0.761622 | 0.900675 |
| 9452 | 10387568 | <a href="#">NM_001034097</a>       | <a href="#">619441</a>    | tumor necrosis factor (ligand)    | <a href="#">Tnfsf12-tnfsf13</a>    | 0.992 | 0.085  | 0.934605 | 0.973973 |
| 9453 | 10460018 | <a href="#">ENSMUST00000097504</a> | <a href="#">329002</a>    | zinc finger protein 236           | <a href="#">Zfp236</a>             | 0.992 | -0.496 | 0.634761 | 0.833935 |
| 9454 | 10531420 | <a href="#">NM_019494</a>          | <a href="#">56066</a>     | chemokine (C-X-C motif) ligand    | <a href="#">Cxcl11</a>             | 0.992 | -0.102 | 0.921321 | 0.968644 |
| 9455 | 10458581 | <a href="#">ENSMUST00000071086</a> | <a href="#">791268</a>    | predicted gene,<br>ENSMUSG0000005 | <a href="#">ENSMUSG00000056742</a> | 0.992 | -0.222 | 0.830774 | 0.932075 |
| 9456 | 10445434 | <a href="#">NM_026768</a>          | <a href="#">68565</a>     | mitochondrial ribosomal protei    | <a href="#">Mrps18a</a>            | 0.992 | -0.665 | 0.526726 | 0.762763 |
| 9457 | 10461758 | <a href="#">BC010803</a>           | <a href="#">64697</a>     | kidney expressed gene 1           | <a href="#">Keg1</a>               | 0.992 | 0.089  | 0.931409 | 0.972759 |
| 9458 | 10591634 | <a href="#">NM_177030</a>          | <a href="#">319899</a>    | dedicator of cytokinesis 6        | <a href="#">Dock6</a>              | 0.992 | -0.072 | 0.94429  | 0.977948 |
| 9459 | 10407251 | <a href="#">NM_001081062</a>       | <a href="#">218630</a>    | cyclin O                          | <a href="#">Cno</a>                | 0.992 | -0.104 | 0.920235 | 0.968133 |
| 9460 | 10395250 |                                    |                           |                                   |                                    | 0.992 | 0.024  | 0.981712 | 0.992129 |
| 9461 | 10580850 |                                    |                           |                                   |                                    | 0.992 | 0.068  | 0.94732  | 0.979133 |
| 9462 | 10538318 | <a href="#">NM_025816</a>          | <a href="#">52440</a>     | Tax1 (human T-cell leukemia vi    | <a href="#">Tax1bp1</a>            | 0.992 | -0.681 | 0.517255 | 0.756501 |
| 9463 | 10505791 | <a href="#">NM_001081184</a>       | <a href="#">230393</a>    | cDNA sequence BC057079            | <a href="#">BC057079</a>           | 0.992 | -0.453 | 0.66388  | 0.850267 |
| 9464 | 10498371 | <a href="#">NM_027571</a>          | <a href="#">70839</a>     | purinergic receptor P2Y, G-pro    | <a href="#">P2ry12</a>             | 0.992 | -0.129 | 0.900779 | 0.960826 |
| 9465 | 10488879 | <a href="#">NM_008180</a>          | <a href="#">14854</a>     | glutathione synthetase            | <a href="#">Gss</a>                | 0.992 | -0.257 | 0.804679 | 0.920977 |
| 9466 | 10510914 | <a href="#">BC068299</a>           | <a href="#">242800</a>    | RIKEN cDNA B230396O12 gene        | <a href="#">B230396O12Rik</a>      | 0.992 | -0.108 | 0.916946 | 0.967219 |

|      |          |                                    |                        |                                  |                                     |       |        |          |          |
|------|----------|------------------------------------|------------------------|----------------------------------|-------------------------------------|-------|--------|----------|----------|
| 9467 | 10501731 | <a href="#">NM_011527</a>          | <a href="#">21349</a>  | I-cell acute lymphocytic leuke   | <a href="#">Ial1</a>                | 0.992 | 0.07   | 0.946073 | 0.978614 |
| 9468 | 10476401 | <a href="#">NM_019677</a>          | <a href="#">18795</a>  | phospholipase C, beta 1          | <a href="#">Plcb1</a>               | 0.992 | 0.052  | 0.959819 | 0.984926 |
| 9469 | 10375547 | <a href="#">NM_206822</a>          | <a href="#">18307</a>  | olfactory receptor 10            | <a href="#">Olf10</a>               | 0.992 | 0.212  | 0.838096 | 0.934421 |
| 9470 | 10465740 | <a href="#">XR_031281</a>          | <a href="#">620946</a> | similar to hCG2043493            | <a href="#">LOC620946</a>           | 0.992 | 0.193  | 0.852459 | 0.940498 |
| 9471 | 10414932 |                                    |                        |                                  |                                     | 0.992 | 0.381  | 0.713829 | 0.874714 |
| 9472 | 10417940 | <a href="#">NM_175132</a>          | <a href="#">68760</a>  | synaptopodin 2-like              | <a href="#">Synpo2l</a>             | 0.992 | -0.037 | 0.971257 | 0.988148 |
| 9473 | 10352097 | <a href="#">NM_027077</a>          | <a href="#">69428</a>  | RIKEN cDNA 1700016C15 gene       | <a href="#">1700016C15Rik</a>       | 0.992 | -0.103 | 0.920562 | 0.968204 |
| 9474 | 10425370 | <a href="#">NM_001044308</a>       | <a href="#">239556</a> | calcium channel, voltage-depen   | <a href="#">Caena1i</a>             | 0.992 | -0.109 | 0.916215 | 0.966842 |
| 9475 | 10535065 | <a href="#">NM_172723</a>          | <a href="#">231821</a> | centaurin, alpha 1               | <a href="#">Centa1</a>              | 0.992 | 0.052  | 0.960185 | 0.985016 |
| 9476 | 10415030 | <a href="#">NM_026936</a>          | <a href="#">69089</a>  | oxidase assembly 1-like          | <a href="#">Oxa1l</a>               | 0.992 | -0.968 | 0.364398 | 0.635557 |
| 9477 | 10478495 | <a href="#">NM_001048227</a>       | <a href="#">52840</a>  | dysbindin (dystrobrevin bindin   | <a href="#">Dbndd2</a>              | 0.992 | 0.008  | 0.99386  | 0.997702 |
| 9478 | 10416259 | <a href="#">NM_021328</a>          | <a href="#">57784</a>  | bridging integrator 3            | <a href="#">Bin3</a>                | 0.992 | -0.198 | 0.913062 | 0.985383 |
| 9480 | 10387871 | <a href="#">NM_029231</a>          | <a href="#">75273</a>  | proline, glutamic acid and leu   | <a href="#">Pelpl</a>               | 0.992 | -0.566 | 0.588483 | 0.805157 |
| 9481 | 10449765 | <a href="#">AK138248</a>           | <a href="#">623548</a> | predicted gene, ENSMUSG000000000 | <a href="#">ENSMUSG00000002791</a>  | 0.992 | -0.243 | 0.815045 | 0.925775 |
| 9482 | 10577326 | <a href="#">NM_176951</a>          | <a href="#">319581</a> | X Kell blood group precursor-r   | <a href="#">Xkr5</a>                | 0.992 | -0.022 | 0.98268  | 0.992443 |
| 9483 | 10487597 | <a href="#">NM_008361</a>          | <a href="#">16176</a>  | interleukin 1 beta               | <a href="#">Il1b</a>                | 0.992 | -0.122 | 0.906319 | 0.963405 |
| 9484 | 10492971 | <a href="#">NM_178165</a>          | <a href="#">229499</a> | Fc receptor-like 1               | <a href="#">Fcr1l</a>               | 0.992 | 1.038  | 0.332718 | 0.608795 |
| 9485 | 10490510 | <a href="#">NM_175551</a>          | <a href="#">23856</a>  | death inducer-obliator 1         | <a href="#">Dido1</a>               | 0.992 | -0.213 | 0.837194 | 0.934421 |
| 9486 | 10412616 | <a href="#">NM_025938</a>          | <a href="#">67053</a>  | ribonuclease P 14 subunit (hum   | <a href="#">Rpp14</a>               | 0.992 | -1.095 | 0.30865  | 0.585248 |
| 9487 | 10376986 | <a href="#">AK046601</a>           | <a href="#">791305</a> | predicted gene, ENSMUSG000000005 | <a href="#">ENSMUSG000000052860</a> | 0.992 | 0.286  | 0.783246 | 0.911971 |
| 9488 | 10442302 | <a href="#">NM_001033425</a>       | <a href="#">332221</a> | zinc finger and SCAN domain co   | <a href="#">Zscan10</a>             | 0.992 | -0.14  | 0.892121 | 0.957703 |
| 9489 | 10454564 | <a href="#">NM_133658</a>          | <a href="#">13872</a>  | excision repair cross-compleme   | <a href="#">Ercc3</a>               | 0.992 | -1.034 | 0.334428 | 0.60995  |
| 9490 | 10529068 | <a href="#">NM_011773</a>          | <a href="#">22784</a>  | solute carrier family 30 (zinc   | <a href="#">Slc30a3</a>             | 0.992 | -0.037 | 0.971357 | 0.988148 |
| 9491 | 10596263 |                                    |                        |                                  |                                     | 0.992 | -0.06  | 0.954136 | 0.982421 |
| 9492 | 10431564 | <a href="#">NM_009948</a>          | <a href="#">12895</a>  | carnitine palmitoyltransferase   | <a href="#">Cpt1b</a>               | 0.992 | -0.164 | 0.874059 | 0.949893 |
| 9493 | 10392259 | <a href="#">ENSMUST00000100311</a> | <a href="#">66313</a>  | SMAD specific E3 ubiquitin pro   | <a href="#">Smurf2</a>              | 0.992 | -0.37  | 0.721948 | 0.879059 |
| 9494 | 10433088 | <a href="#">NM_007626</a>          | <a href="#">12419</a>  | chromobox homolog 5 (Drosophil   | <a href="#">Cbx5</a>                | 0.992 | -0.024 | 0.981624 | 0.992092 |
| 9495 | 10569733 | <a href="#">NM_133962</a>          | <a href="#">102098</a> | rho/rac guanine nucleotide exc   | <a href="#">Arhgef18</a>            | 0.992 | -0.264 | 0.798833 | 0.918762 |
| 9496 | 10516880 | <a href="#">NM_001081651</a>       | <a href="#">242681</a> | RIKEN cDNA 9530096D07 gene       | <a href="#">9530096D07Rik</a>       | 0.992 | -0.004 | 0.996707 | 0.998777 |
| 9497 | 10408810 |                                    |                        |                                  |                                     | 0.992 | 0.141  | 0.892021 | 0.95769  |
| 9498 | 10449873 | <a href="#">NM_212438</a>          | <a href="#">22404</a>  | widely-interspaced zinc finger   | <a href="#">Wiz</a>                 | 0.992 | -0.472 | 0.650895 | 0.843602 |
| 9499 | 10371159 | <a href="#">NM_019757</a>          | <a href="#">56371</a>  | fizzy/cell division cycle 20 r   | <a href="#">Fzr1</a>                | 0.992 | -0.263 | 0.799821 | 0.919199 |
| 9500 | 10398814 | <a href="#">NM_001097621</a>       | <a href="#">668303</a> | kinesin family member 26A        | <a href="#">Kif26a</a>              | 0.992 | 0.086  | 0.933446 | 0.973406 |
| 9501 | 10479933 | <a href="#">XR_031822</a>          | <a href="#">634939</a> | similar to TRAF-interacting pr   | <a href="#">LOC634939</a>           | 0.992 | -0.19  | 0.854526 | 0.94107  |
| 9502 | 10477737 |                                    |                        |                                  |                                     | 0.992 | 0.33   | 0.750774 | 0.894733 |
| 9503 | 10480849 | <a href="#">NM_007995</a>          | <a href="#">14133</a>  | ficolin A                        | <a href="#">Fcna</a>                | 0.992 | 0.466  | 0.654759 | 0.845294 |
| 9504 | 10438702 | <a href="#">BC106179</a>           | <a href="#">320099</a> | cDNA sequence BC106179           | <a href="#">BC106179</a>            | 0.992 | -0.209 | 0.840507 | 0.935549 |
| 9505 | 10357570 | <a href="#">NM_001009940</a>       | <a href="#">329244</a> | interleukin 19                   | <a href="#">Il19</a>                | 0.992 | 0.063  | 0.951153 | 0.981129 |
| 9506 | 10540191 | <a href="#">NM_011630</a>          | <a href="#">22026</a>  | nuclear receptor subfamily 2,    | <a href="#">Nr2c2</a>               | 0.992 | -0.457 | 0.660975 | 0.84894  |
| 9507 | 10550870 | <a href="#">NM_029806</a>          | <a href="#">76942</a>  | Ly6/Plaur domain containing 5    | <a href="#">Lypd5</a>               | 0.992 | 0.062  | 0.952194 | 0.981389 |
| 9508 | 10522208 | <a href="#">NM_011670</a>          | <a href="#">22223</a>  | ubiquitin carboxy-terminal hyd   | <a href="#">Uchl1</a>               | 0.992 | -0.776 | 0.462369 | 0.716898 |
| 9509 | 10430140 | <a href="#">NM_013593</a>          | <a href="#">17189</a>  | myoglobin                        | <a href="#">Mb</a>                  | 0.992 | 0.431  | 0.679255 | 0.857678 |
| 9510 | 10379627 |                                    |                        |                                  |                                     | 0.992 | -0.44  | 0.672961 | 0.854651 |
| 9511 | 10357292 | <a href="#">NM_025860</a>          | <a href="#">66942</a>  | DEAD (Asp-Glu-Ala-Asp) box pol   | <a href="#">Ddx18</a>               | 0.992 | -0.786 | 0.456793 | 0.712642 |
| 9512 | 10602772 | <a href="#">NM_148945</a>          | <a href="#">110651</a> | ribosomal protein S6 kinase po   | <a href="#">Rps6ka3</a>             | 0.992 | -0.458 | 0.66033  | 0.848652 |
| 9513 | 10479649 | <a href="#">NM_133701</a>          | <a href="#">68879</a>  | PRP6 pre-mRNA splicing factor    | <a href="#">Prpl6</a>               | 0.992 | -0.683 | 0.516106 | 0.755582 |
| 9514 | 10528077 | <a href="#">NM_013726</a>          | <a href="#">27214</a>  | DBF4 homolog (S. cerevisiae)     | <a href="#">Dbf4</a>                | 0.992 | 0.055  | 0.957638 | 0.983978 |
| 9515 | 10532984 | <a href="#">NM_019682</a>          | <a href="#">56455</a>  | dynein light chain LC8-type 1    | <a href="#">Dynll1</a>              | 0.992 | -0.502 | 0.630494 | 0.831639 |
| 9516 | 10546217 | <a href="#">NM_025351</a>          | <a href="#">66098</a>  | coiled-coil-helix-coiled-coil-   | <a href="#">Chchd6</a>              | 0.992 | -0.403 | 0.698845 | 0.868075 |
| 9517 | 10380137 | <a href="#">NM_172449</a>          | <a href="#">207777</a> | benzodiazapine receptor associ   | <a href="#">Bzrap1</a>              | 0.992 | -0.139 | 0.89318  | 0.957774 |
| 9518 | 10307069 | <a href="#">NM_027340</a>          | <a href="#">67030</a>  | DNA binding motif protein 25     | <a href="#">Dhm25</a>               | 0.992 | 0.040  | 0.962035 | 0.985262 |

|      |          |                                    |                           |                                 |                                    |       |        |          |          |
|------|----------|------------------------------------|---------------------------|---------------------------------|------------------------------------|-------|--------|----------|----------|
| 9518 | 10577006 | <a href="#">NM_027542</a>          | <a href="#">67052</a>     | RNA binding motif protein 23    | <a href="#">Rbm23</a>              | 0.992 | -0.049 | 0.902055 | 0.785502 |
| 9519 | 10571634 | <a href="#">NM_026278</a>          | <a href="#">67620</a>     | Lrp2 binding protein            | <a href="#">Lrp2bp</a>             | 0.992 | -0.034 | 0.973524 | 0.988697 |
| 9520 | 10392318 | <a href="#">NM_176850</a>          | <a href="#">207165</a>    | bromodomain PHD finger transcr  | <a href="#">Bptf</a>               | 0.991 | -0.49  | 0.638638 | 0.835923 |
| 9521 | 10399825 | <a href="#">NM_007861</a>          | <a href="#">13382</a>     | dihydroipoamide dehydrogenase   | <a href="#">Dld</a>                | 0.991 | -0.599 | 0.567788 | 0.792987 |
| 9522 | 10474698 |                                    |                           |                                 |                                    | 0.991 | 0.15   | 0.884708 | 0.954694 |
| 9523 | 10568968 | <a href="#">ENSMUST00000026553</a> | <a href="#">74075</a>     | synaptonemal complex central e  | <a href="#">Syce1</a>              | 0.991 | 0.002  | 0.998523 | 0.999521 |
| 9524 | 10397416 | <a href="#">BC038915</a>           | <a href="#">76411</a>     | RIKEN cDNA 1700019E19 gene      | <a href="#">1700019E19Rik</a>      | 0.991 | -0.524 | 0.615672 | 0.822286 |
| 9525 | 10350864 | <a href="#">NM_033354</a>          | <a href="#">89867</a>     | SEC16 homolog B (S. cerevisiae) | <a href="#">Sec16b</a>             | 0.991 | -0.39  | 0.707661 | 0.872268 |
| 9526 | 10395604 | <a href="#">ENSMUST00000056234</a> | <a href="#">620583</a>    | predicted gene, ENSMUSG0000004  | <a href="#">ENSMUSG00000045946</a> | 0.991 | -0.408 | 0.694806 | 0.866071 |
| 9527 | 10579731 | <a href="#">NM_027485</a>          | <a href="#">70625</a>     | mediator complex subunit 26     | <a href="#">Med26</a>              | 0.991 | -0.606 | 0.56284  | 0.789799 |
| 9528 | 10425985 |                                    |                           |                                 |                                    | 0.991 | 0.726  | 0.490743 | 0.737369 |
| 9529 | 10577645 | <a href="#">NM_145949</a>          | <a href="#">209176</a>    | indoleamine-pyrrole 2,3 dioxyg  | <a href="#">Indol1</a>             | 0.991 | 0.244  | 0.814155 | 0.925212 |
| 9530 | 10487109 | <a href="#">NM_001081091</a>       | <a href="#">99100</a>     | centrosomal protein 152         | <a href="#">Cep152</a>             | 0.991 | 0.213  | 0.837073 | 0.934383 |
| 9531 | 10509858 | <a href="#">NM_023374</a>          | <a href="#">67680</a>     | succinate dehydrogenase comple  | <a href="#">Sdhb</a>               | 0.991 | -0.622 | 0.552926 | 0.782578 |
| 9532 | 10470907 | <a href="#">AK031561</a>           | <a href="#">56086</a>     | SET translocation               | <a href="#">Set</a>                | 0.991 | 0.433  | 0.677937 | 0.856898 |
| 9533 | 10563050 | <a href="#">NM_175022</a>          | <a href="#">233210</a>    | proline rich 12                 | <a href="#">Ptr12</a>              | 0.991 | -0.299 | 0.773637 | 0.9067   |
| 9534 | 10526956 | <a href="#">NM_013702</a>          | <a href="#">22255</a>     | UNC homeobox                    | <a href="#">Uncx</a>               | 0.991 | 0.237  | 0.819028 | 0.928106 |
| 9535 | 10527186 | <a href="#">NM_133355</a>          | <a href="#">170935</a>    | glutamate receptor, ionotropic  | <a href="#">Grid2ip</a>            | 0.991 | -0.038 | 0.970762 | 0.988147 |
| 9536 | 10427125 | <a href="#">NM_008344</a>          | <a href="#">16012</a>     | insulin-like growth factor bin  | <a href="#">Igfbp6</a>             | 0.991 | 0.105  | 0.919168 | 0.967863 |
| 9537 | 10446592 | <a href="#">ENSMUST00000003366</a> | <a href="#">224997</a>    | discs, large (Drosophila) homo  | <a href="#">Dlgap1</a>             | 0.991 | -0.061 | 0.952665 | 0.981683 |
| 9538 | 10585749 | <a href="#">NM_009992</a>          | <a href="#">13076</a>     | cytochrome P450, family 1, sub  | <a href="#">Cyp1a1</a>             | 0.991 | 0.025  | 0.9806   | 0.991919 |
| 9539 | 10505627 | <a href="#">XM_001477111</a>       | <a href="#">100046944</a> | hypothetical protein LOC100046  | <a href="#">LOC100046944</a>       | 0.991 | -0.075 | 0.941949 | 0.977644 |
| 9540 | 10437775 | <a href="#">ENSMUST00000100177</a> | <a href="#">70100</a>     | RIKEN cDNA 2310015D24 gene      | <a href="#">2310015D24Rik</a>      | 0.991 | 0.052  | 0.960123 | 0.985    |
| 9541 | 10469786 | <a href="#">NM_153511</a>          | <a href="#">215257</a>    | interleukin 1 family, member 9  | <a href="#">Il1f9</a>              | 0.991 | 0.287  | 0.782117 | 0.911385 |
| 9542 | 10468593 | <a href="#">NM_008733</a>          | <a href="#">18175</a>     | nebulin-related anchoring prot  | <a href="#">Nrap</a>               | 0.991 | -0.129 | 0.901257 | 0.961171 |
| 9543 | 10591869 | <a href="#">NM_020586</a>          | <a href="#">80517</a>     | HERPUD family member 2          | <a href="#">Herpud2</a>            | 0.991 | -0.186 | 0.857649 | 0.94267  |
| 9544 | 10431912 |                                    |                           |                                 |                                    | 0.991 | -0.089 | 0.931629 | 0.972759 |
| 9545 | 10472562 | <a href="#">NM_001081087</a>       | <a href="#">228003</a>    | kelch repeat and BTB (POZ) dom  | <a href="#">Kbtbd10</a>            | 0.991 | -0.051 | 0.960671 | 0.985069 |
| 9546 | 10465474 | <a href="#">NM_012021</a>          | <a href="#">54683</a>     | peroxiredoxin 5                 | <a href="#">Prdx5</a>              | 0.991 | -0.812 | 0.442532 | 0.701207 |
| 9547 | 10476873 |                                    |                           |                                 |                                    | 0.991 | 0.239  | 0.818046 | 0.827633 |
| 9548 | 10512628 | <a href="#">NM_019476</a>          | <a href="#">29849</a>     | olfactory receptor 159          | <a href="#">Olf159</a>             | 0.991 | -0.022 | 0.98311  | 0.992978 |
| 9549 | 10608024 |                                    |                           |                                 |                                    | 0.991 | 0.025  | 0.98072  | 0.991919 |
| 9550 | 10554475 | <a href="#">NM_178707</a>          | <a href="#">233410</a>    | zinc finger protein 592         | <a href="#">Zfp592</a>             | 0.991 | -0.07  | 0.946108 | 0.978614 |
| 9551 | 10425031 | <a href="#">ENSMUST00000048285</a> | <a href="#">71939</a>     | apolipoprotein L 6              | <a href="#">Apol6</a>              | 0.991 | -0.281 | 0.786634 | 0.912925 |
| 9552 | 10470027 | <a href="#">NM_008721</a>          | <a href="#">18146</a>     | neural proliferation, differen  | <a href="#">Npdc1</a>              | 0.991 | -0.071 | 0.945568 | 0.97847  |
| 9553 | 10559568 | <a href="#">NM_001033548</a>       | <a href="#">436022</a>    | RIKEN cDNA 6030429G01 gene      | <a href="#">6030429G01Rik</a>      | 0.991 | -0.604 | 0.564199 | 0.790603 |
| 9554 | 10367582 | <a href="#">NM_011702</a>          | <a href="#">22353</a>     | vasoactive intestinal polypept  | <a href="#">Vip</a>                | 0.991 | 0.028  | 0.978564 | 0.991413 |
| 9555 | 10454580 | <a href="#">NM_009668</a>          | <a href="#">30948</a>     | bridging integrator 1           | <a href="#">Bin1</a>               | 0.991 | -0.784 | 0.45815  | 0.71339  |
| 9556 | 10413795 | <a href="#">NM_028932</a>          | <a href="#">74427</a>     | ELL associated factor 1         | <a href="#">Eaf1</a>               | 0.991 | -0.517 | 0.620811 | 0.825734 |
| 9557 | 10592503 | <a href="#">NM_019465</a>          | <a href="#">54698</a>     | cytotoxic and regulatory T cel  | <a href="#">Crtam</a>              | 0.991 | -0.01  | 0.992218 | 0.996933 |
| 9558 | 10510286 | <a href="#">NM_027985</a>          | <a href="#">71890</a>     | MAD2 mitotic arrest deficient-  | <a href="#">Mad2l2</a>             | 0.991 | -0.488 | 0.640229 | 0.836909 |
| 9559 | 10578045 | <a href="#">NM_178591</a>          | <a href="#">211323</a>    | neuregulin 1                    | <a href="#">Nrg1</a>               | 0.991 | -0.217 | 0.834253 | 0.933071 |
| 9560 | 10448748 | <a href="#">NM_011956</a>          | <a href="#">26426</a>     | nucleotide binding protein 2    | <a href="#">Nubp2</a>              | 0.991 | 0.052  | 0.960097 | 0.985    |
| 9561 | 10462752 | <a href="#">NM_001080706</a>       | <a href="#">107182</a>    | BTAF1 RNA polymerase II, B-TFI  | <a href="#">Btaf1</a>              | 0.991 | -0.357 | 0.731396 | 0.884161 |
| 9562 | 10347362 |                                    |                           |                                 |                                    | 0.991 | -0.114 | 0.912581 | 0.965167 |
| 9563 | 10430201 | <a href="#">NM_022410</a>          | <a href="#">17886</a>     | myosin, heavy polypeptide 9, n  | <a href="#">Myh9</a>               | 0.991 | -0.586 | 0.575641 | 0.797076 |
| 9564 | 10597764 | <a href="#">NM_001081339</a>       | <a href="#">22437</a>     | xin actin-binding repeat conta  | <a href="#">Xirp1</a>              | 0.991 | 0.51   | 0.625177 | 0.829015 |
| 9565 | 10388109 | <a href="#">NM_001024927</a>       | <a href="#">327958</a>    | PITPNM family member 3          | <a href="#">Pitpnm3</a>            | 0.991 | -0.043 | 0.967125 | 0.986963 |
| 9566 | 10549780 | <a href="#">NM_010147</a>          | <a href="#">13854</a>     | epsin 1                         | <a href="#">Epn1</a>               | 0.991 | -0.1   | 0.923109 | 0.969271 |
| 9567 | 10579070 | <a href="#">NM_172754</a>          | <a href="#">234362</a>    | expressed sequence AI449175     | <a href="#">AI449175</a>           | 0.991 | -0.761 | 0.470937 | 0.722763 |
| 9568 | 10556962 | <a href="#">NM_177697</a>          | <a href="#">233813</a>    | von Willebrand factor A domain  | <a href="#">Vwa3a</a>              | 0.991 | 0.146  | 0.887624 | 0.955679 |
| 9569 | 10542229 |                                    |                           |                                 |                                    | 0.991 | 0.182  | 0.86067  | 0.943954 |
| 9570 | 10576191 | <a href="#">NM_153176</a>          | <a href="#">234847</a>    | spastic paraplegia 7 homolog (  | <a href="#">Spg7</a>               | 0.991 | -0.802 | 0.448241 | 0.70581  |

|      |          |                                    |                           |                                |                                    |       |        |          |          |
|------|----------|------------------------------------|---------------------------|--------------------------------|------------------------------------|-------|--------|----------|----------|
| 9571 | 10367546 | <a href="#">NM_001039652</a>       | <a href="#">18390</a>     | opioid receptor, mu 1          | <a href="#">Oprm1</a>              | 0.991 | -0.128 | 0.901647 | 0.961371 |
| 9572 | 10600529 |                                    |                           |                                |                                    | 0.991 | -0.301 | 0.772168 | 0.906083 |
| 9573 | 10579406 | <a href="#">NM_027560</a>          | <a href="#">70807</a>     | arrestin domain containing 2   | <a href="#">Arrdc2</a>             | 0.991 | -0.146 | 0.887655 | 0.955679 |
| 9574 | 10556135 |                                    |                           |                                |                                    | 0.991 | 0.343  | 0.741244 | 0.889595 |
| 9575 | 10558242 | <a href="#">NM_145998</a>          | <a href="#">15372</a>     | H6 homeo box 2                 | <a href="#">Hmx2</a>               | 0.991 | -0.363 | 0.727159 | 0.881698 |
| 9576 | 10523275 | <a href="#">XR_004671</a>          | <a href="#">674636</a>    | similar to ribosomal protein L | <a href="#">LOC674636</a>          | 0.991 | -0.234 | 0.821265 | 0.92863  |
| 9577 | 10461663 | <a href="#">NM_025606</a>          | <a href="#">94063</a>     | mitochondrial ribosomal protei | <a href="#">Mrpl16</a>             | 0.991 | -0.751 | 0.476204 | 0.727414 |
| 9578 | 10494957 | <a href="#">NM_026193</a>          | <a href="#">67489</a>     | adaptor-related protein comple | <a href="#">Ap4b1</a>              | 0.991 | -0.795 | 0.451873 | 0.708709 |
| 9579 | 10345228 | <a href="#">ENSMUST00000051203</a> | <a href="#">67503</a>     | RIKEN cDNA 1700001G17 gene     | <a href="#">1700001G17Rik</a>      | 0.991 | -0.389 | 0.708742 | 0.872527 |
| 9580 | 10364301 | <a href="#">ENSMUST00000092368</a> | <a href="#">252974</a>    | RIKEN cDNA C330046G03 gene     | <a href="#">C330046G03Rik</a>      | 0.991 | -0.135 | 0.896073 | 0.95935  |
| 9581 | 10448278 | <a href="#">NM_001033339</a>       | <a href="#">240047</a>    | matrix metallopeptidase 25     | <a href="#">Mmp25</a>              | 0.991 | -0.451 | 0.665363 | 0.850877 |
| 9582 | 10458843 | <a href="#">NM_018744</a>          | <a href="#">20358</a>     | sema domain, transmembrane dom | <a href="#">Sema6a</a>             | 0.991 | -0.26  | 0.802164 | 0.919892 |
| 9583 | 10405355 | <a href="#">NM_153131</a>          | <a href="#">107448</a>    | unc-5 homolog A (C. elegans)   | <a href="#">Unc5a</a>              | 0.991 | 0.07   | 0.946415 | 0.978837 |
| 9584 | 10499363 | <a href="#">NM_001037939</a>       | <a href="#">12096</a>     | bone gamma carboxyglutamate pr | <a href="#">Bglap1</a>             | 0.991 | 0.196  | 0.850137 | 0.939689 |
| 9585 | 10448582 | <a href="#">NM_019988</a>          | <a href="#">56716</a>     | G protein beta subunit-like    | <a href="#">Gbl</a>                | 0.991 | -0.45  | 0.66594  | 0.851154 |
| 9586 | 10431486 | <a href="#">NM_001081030</a>       | <a href="#">77980</a>     | SET binding factor 1           | <a href="#">Sbf1</a>               | 0.991 | -0.299 | 0.773467 | 0.9067   |
| 9587 | 10445992 | <a href="#">NM_009168</a>          | <a href="#">20420</a>     | src homology 2 domain-containi | <a href="#">Shd</a>                | 0.991 | 0.036  | 0.972334 | 0.98815  |
| 9588 | 10562044 | <a href="#">NM_021397</a>          | <a href="#">58206</a>     | zinc finger and BTB domain con | <a href="#">Zbtb32</a>             | 0.991 | 0.08   | 0.938545 | 0.976028 |
| 9589 | 10582429 | <a href="#">NM_009824</a>          | <a href="#">12398</a>     | core-binding factor, runt doma | <a href="#">Cbfa2t3</a>            | 0.991 | 0.049  | 0.962534 | 0.985405 |
| 9590 | 10357870 | <a href="#">NM_054077</a>          | <a href="#">116847</a>    | proline arginine-rich end leuc | <a href="#">Prelp</a>              | 0.991 | 0.199  | 0.84741  | 0.938194 |
| 9591 | 10407274 |                                    |                           |                                |                                    | 0.991 | 0.206  | 0.842338 | 0.936059 |
| 9592 | 10520982 | <a href="#">NM_001025426</a>       | <a href="#">277854</a>    | DEP domain containing 5        | <a href="#">Depdc5</a>             | 0.991 | -0.265 | 0.798204 | 0.918238 |
| 9593 | 10347988 | <a href="#">ENSMUST00000027426</a> | <a href="#">71141</a>     | RIKEN cDNA 4933407L21 gene     | <a href="#">4933407L21Rik</a>      | 0.991 | 0.026  | 0.979902 | 0.991919 |
| 9594 | 10458685 | <a href="#">ENSMUST00000097589</a> | <a href="#">76217</a>     | janus kinase and microtubule i | <a href="#">Jakmp2</a>             | 0.991 | -0.139 | 0.893179 | 0.957774 |
| 9595 | 10377405 | <a href="#">NM_011496</a>          | <a href="#">20877</a>     | aurora kinase B                | <a href="#">Aurkb</a>              | 0.991 | -0.538 | 0.606639 | 0.816784 |
| 9596 | 10451413 | <a href="#">BC011248</a>           | <a href="#">224823</a>    | cDNA sequence BC011248         | <a href="#">BC011248</a>           | 0.991 | 0.09   | 0.930768 | 0.972759 |
| 9597 | 10380793 | <a href="#">NM_139311</a>          | <a href="#">246198</a>    | myeloid/lymphoid or mixed-line | <a href="#">Mllt6</a>              | 0.991 | -0.176 | 0.865276 | 0.946164 |
| 9598 | 10516495 | <a href="#">ENSMUST00000030614</a> | <a href="#">635169</a>    | hypothetical LOC635169         | <a href="#">LOC635169</a>          | 0.991 | -0.114 | 0.912149 | 0.964951 |
| 9599 | 10405994 | <a href="#">NM_138596</a>          | <a href="#">28077</a>     | mediator of RNA polymerase II  | <a href="#">Med10</a>              | 0.991 | -0.653 | 0.534306 | 0.768319 |
| 9600 | 10434528 | <a href="#">NM_009893</a>          | <a href="#">12667</a>     | chordin                        | <a href="#">Chrd</a>               | 0.991 | -0.006 | 0.995214 | 0.998141 |
| 9601 | 10481101 |                                    |                           |                                |                                    | 0.991 | -0.165 | 0.873356 | 0.949372 |
| 9602 | 10389064 | <a href="#">NM_011329</a>          | <a href="#">20290</a>     | chemokine (C-C motif) ligand 1 | <a href="#">Ccl1</a>               | 0.991 | -0.222 | 0.830757 | 0.932075 |
| 9603 | 10503856 | <a href="#">NM_008076</a>          | <a href="#">14409</a>     | gamma-aminobutyric acid (GABA- | <a href="#">Gabrr2</a>             | 0.991 | -0.246 | 0.812719 | 0.924689 |
| 9604 | 10534660 | <a href="#">NM_007457</a>          | <a href="#">11769</a>     | adaptor protein complex AP-1,  | <a href="#">Ap1s1</a>              | 0.99  | -0.224 | 0.829161 | 0.931303 |
| 9605 | 10374106 | <a href="#">NM_019661</a>          | <a href="#">56418</a>     | YKT6 homolog (S. Cerevisiae)   | <a href="#">Ykt6</a>               | 0.99  | -0.673 | 0.522127 | 0.759088 |
| 9606 | 10413559 | <a href="#">NM_177815</a>          | <a href="#">328370</a>    | RFT1 homolog (S. cerevisiae)   | <a href="#">Rft1</a>               | 0.99  | 0.055  | 0.957916 | 0.984168 |
| 9607 | 10426603 | <a href="#">AK140384</a>           | <a href="#">100048895</a> | predicted gene, ENSMUSG0000007 | <a href="#">ENSMUSG00000075426</a> | 0.99  | -0.414 | 0.690911 | 0.864447 |
| 9608 | 10490672 | <a href="#">NM_029702</a>          | <a href="#">76688</a>     | ADP-ribosylation factor relate | <a href="#">Arfp1</a>              | 0.99  | -0.891 | 0.40187  | 0.667094 |
| 9609 | 10525983 | <a href="#">NM_009391</a>          | <a href="#">19384</a>     | RAN, member RAS oncogene famil | <a href="#">Ran</a>                | 0.99  | -0.272 | 0.793096 | 0.9157   |
| 9610 | 10375234 | <a href="#">NM_026023</a>          | <a href="#">52653</a>     | NudC domain containing 2       | <a href="#">Nudcd2</a>             | 0.99  | -0.155 | 0.880978 | 0.952856 |
| 9611 | 10606619 | <a href="#">NM_013757</a>          | <a href="#">27359</a>     | synaptotagmin-like 4           | <a href="#">Syt4</a>               | 0.99  | 0.055  | 0.958013 | 0.98422  |
| 9612 | 10364262 | <a href="#">NM_008404</a>          | <a href="#">16414</a>     | integrin beta 2                | <a href="#">Itgb2</a>              | 0.99  | -0.017 | 0.986593 | 0.994448 |
| 9613 | 10348180 | <a href="#">NM_001039169</a>       | <a href="#">26987</a>     | eukaryotic translation initiat | <a href="#">Eif4e2</a>             | 0.99  | -0.544 | 0.602963 | 0.814375 |
| 9614 | 10368630 | <a href="#">NM_025614</a>          | <a href="#">66521</a>     | RWD domain containing 1        | <a href="#">Rwdd1</a>              | 0.99  | -0.285 | 0.783304 | 0.911971 |
| 9615 | 10384004 | <a href="#">NM_178623</a>          | <a href="#">72046</a>     | RIKEN cDNA 2010005J08 gene     | <a href="#">2010005J08Rik</a>      | 0.99  | -0.509 | 0.625901 | 0.829513 |
| 9616 | 10570472 | <a href="#">NM_012000</a>          | <a href="#">26889</a>     | ceroid-lipofuscinosis, neurona | <a href="#">Cln8</a>               | 0.99  | -0.351 | 0.735504 | 0.886814 |
| 9617 | 10393387 | <a href="#">NM_033398</a>          | <a href="#">107817</a>    | jumonji domain containing 6    | <a href="#">Jmjd6</a>              | 0.99  | -0.356 | 0.732205 | 0.884722 |
| 9618 | 10485294 | <a href="#">NM_019657</a>          | <a href="#">56348</a>     | hydroxysteroid (17-beta) dehyd | <a href="#">Hsd17b12</a>           | 0.99  | -0.695 | 0.509049 | 0.750516 |
| 9619 | 10406838 | <a href="#">ENSMUST00000095522</a> | <a href="#">667718</a>    | predicted gene, EG667718       | <a href="#">EG667718</a>           | 0.99  | -0.099 | 0.923775 | 0.96976  |
| 9620 | 10511832 | <a href="#">ENSMUST00000052917</a> | <a href="#">319564</a>    | RIKEN cDNA C230012O17 gene     | <a href="#">C230012O17Rik</a>      | 0.99  | -0.052 | 0.959754 | 0.984908 |

|      |          |                                    |                        |                                 |                               |      |        |          |          |
|------|----------|------------------------------------|------------------------|---------------------------------|-------------------------------|------|--------|----------|----------|
| 9621 | 10493490 | <a href="#">NM_026767</a>          | <a href="#">68563</a>  | dolichyl-phosphate mannosyltra  | <a href="#">Dpm3</a>          | 0.99 | -0.395 | 0.704608 | 0.870986 |
| 9622 | 10404575 |                                    |                        |                                 |                               | 0.99 | 0.207  | 0.841968 | 0.936059 |
| 9623 | 10429593 | <a href="#">NM_011837</a>          | <a href="#">23934</a>  | lymphocyte antigen 6 complex,   | <a href="#">Ly6h</a>          | 0.99 | 0.166  | 0.872704 | 0.949165 |
| 9624 | 10430006 | <a href="#">NM_028064</a>          | <a href="#">72027</a>  | solute carrier family 39 (zinc  | <a href="#">Slc39a4</a>       | 0.99 | -0.14  | 0.892162 | 0.957703 |
| 9625 | 10472984 | <a href="#">NM_010468</a>          | <a href="#">15434</a>  | homeo box D3                    | <a href="#">Hoxd3</a>         | 0.99 | -0.104 | 0.920033 | 0.968088 |
| 9626 | 10404063 | <a href="#">NM_175660</a>          | <a href="#">319172</a> | histone cluster 1, H2ab         | <a href="#">Hist1h2ab</a>     | 0.99 | -0.641 | 0.541201 | 0.773605 |
| 9627 | 10593095 | <a href="#">NM_001081373</a>       | <a href="#">214552</a> | centrosomal protein 164         | <a href="#">Cep164</a>        | 0.99 | 0.062  | 0.952004 | 0.981385 |
| 9628 | 10552752 | <a href="#">NM_026270</a>          | <a href="#">67605</a>  | AKT1 substrate 1 (proline-rich  | <a href="#">Akt1s1</a>        | 0.99 | -0.197 | 0.849537 | 0.939222 |
| 9629 | 10523880 | <a href="#">NM_144911</a>          | <a href="#">231571</a> | RNA polymerase II associated p  | <a href="#">Rpap2</a>         | 0.99 | -0.547 | 0.600571 | 0.812284 |
| 9630 | 10458816 | <a href="#">NM_173394</a>          | <a href="#">225471</a> | toll-like receptor adaptor mol  | <a href="#">Ticam2</a>        | 0.99 | 0.231  | 0.823557 | 0.929452 |
| 9631 | 10456414 | <a href="#">NM_134138</a>          | <a href="#">107047</a> | proteasome (prosome, macropain  | <a href="#">Psmg2</a>         | 0.99 | -0.337 | 0.745382 | 0.891675 |
| 9632 | 10349510 |                                    |                        |                                 |                               | 0.99 | -0.192 | 0.853134 | 0.940713 |
| 9633 | 10550003 | <a href="#">NM_026112</a>          | <a href="#">67370</a>  | zinc finger protein 606         | <a href="#">Zfp606</a>        | 0.99 | -0.477 | 0.647164 | 0.841007 |
| 9634 | 10468891 |                                    |                        |                                 |                               | 0.99 | -0.122 | 0.906582 | 0.963405 |
| 9635 | 10458806 | <a href="#">ENSMUST00000061488</a> | <a href="#">72076</a>  | motile sperm domain containing  | <a href="#">Mospd4</a>        | 0.99 | -0.02  | 0.98486  | 0.9936   |
| 9636 | 10390426 |                                    |                        |                                 |                               | 0.99 | 0.089  | 0.931584 | 0.972759 |
| 9637 | 10568376 | <a href="#">BC017158</a>           | <a href="#">233913</a> | cDNA sequence BC017158          | <a href="#">BC017158</a>      | 0.99 | -0.098 | 0.924892 | 0.970324 |
| 9638 | 10355550 | <a href="#">NM_178241</a>          | <a href="#">227288</a> | interleukin 8 receptor, alpha   | <a href="#">IL8ra</a>         | 0.99 | 0.39   | 0.708116 | 0.872296 |
| 9639 | 10604169 | <a href="#">NM_001025083</a>       | <a href="#">382282</a> | reproductive homeobox 12        | <a href="#">Rhox12</a>        | 0.99 | -0.209 | 0.840025 | 0.935328 |
| 9640 | 10455146 | <a href="#">ENSMUST00000097608</a> | <a href="#">320513</a> | RIKEN cDNA 3222401L13 gene      | <a href="#">3222401L13Rik</a> | 0.99 | -0.407 | 0.695624 | 0.866211 |
| 9641 | 10541968 | <a href="#">NM_153589</a>          | <a href="#">243634</a> | transmembrane protein 16B       | <a href="#">Tmem16b</a>       | 0.99 | 0.014  | 0.988835 | 0.995308 |
| 9642 | 10486469 | <a href="#">NM_147153</a>          | <a href="#">269338</a> | vacuolar protein sorting 39 (y  | <a href="#">Vps39</a>         | 0.99 | -0.778 | 0.46128  | 0.715891 |
| 9643 | 10554198 | <a href="#">NM_182782</a>          | <a href="#">207952</a> | kelch-like 25 (Drosophila)      | <a href="#">Klhl25</a>        | 0.99 | -0.092 | 0.929396 | 0.972164 |
| 9644 | 10344725 | <a href="#">NM_175236</a>          | <a href="#">76187</a>  | alcohol dehydrogenase, iron co  | <a href="#">Adhfe1</a>        | 0.99 | 0.043  | 0.967068 | 0.986963 |
| 9645 | 10589212 | <a href="#">NM_007738</a>          | <a href="#">12836</a>  | collagen, type VII, alpha 1     | <a href="#">Col7a1</a>        | 0.99 | 0.004  | 0.997047 | 0.998842 |
| 9646 | 10591624 | <a href="#">NM_177030</a>          | <a href="#">319899</a> | dedicator of cytokinesis 6      | <a href="#">Dock6</a>         | 0.99 | -0.387 | 0.709763 | 0.872992 |
| 9647 | 10530142 |                                    |                        |                                 |                               | 0.99 | -0.438 | 0.673957 | 0.855115 |
| 9648 | 10583647 | <a href="#">NM_001039520</a>       | <a href="#">13430</a>  | dynamin 2                       | <a href="#">Dnm2</a>          | 0.99 | -0.51  | 0.6252   | 0.829015 |
| 9649 | 10391103 | <a href="#">NM_010593</a>          | <a href="#">16480</a>  | junction plakoglobin            | <a href="#">Jup</a>           | 0.99 | -0.362 | 0.727677 | 0.88191  |
| 9650 | 10374931 | <a href="#">ENSMUST00000101403</a> | <a href="#">666427</a> | predicted gene, EG666427        | <a href="#">EG666427</a>      | 0.99 | 0.083  | 0.936113 | 0.974841 |
| 9651 | 10568355 | <a href="#">NM_023258</a>          | <a href="#">66824</a>  | PYD and CARD domain containing  | <a href="#">Pycard</a>        | 0.99 | -0.397 | 0.702875 | 0.869709 |
| 9652 | 10517114 |                                    |                        |                                 |                               | 0.99 | 0.476  | 0.648364 | 0.841814 |
| 9653 | 10595614 | <a href="#">BC032970</a>           | <a href="#">72655</a>  | RIKEN cDNA 2810026P18 gene      | <a href="#">2810026P18Rik</a> | 0.99 | -0.518 | 0.620291 | 0.825285 |
| 9654 | 10545932 | <a href="#">NM_025665</a>          | <a href="#">66618</a>  | RIKEN cDNA 2610209M04 gene      | <a href="#">2610209M04Rik</a> | 0.99 | -0.613 | 0.559001 | 0.7865   |
| 9655 | 10582419 | <a href="#">NM_001007462</a>       | <a href="#">382035</a> | poly(A)binding protein nuclear  | <a href="#">Pabpn1</a>        | 0.99 | -0.072 | 0.944693 | 0.978132 |
| 9656 | 10463951 | <a href="#">NM_007790</a>          | <a href="#">13006</a>  | structural maintenance of chrom | <a href="#">Smc3</a>          | 0.99 | -0.545 | 0.601891 | 0.813436 |
| 9657 | 10458382 | <a href="#">NM_009841</a>          | <a href="#">12475</a>  | CD14 antigen                    | <a href="#">Cd14</a>          | 0.99 | -0.409 | 0.694108 | 0.865705 |
| 9658 | 10540984 | <a href="#">NM_145383</a>          | <a href="#">212541</a> | rhodopsin                       | <a href="#">Rho</a>           | 0.99 | 0.121  | 0.906617 | 0.963405 |
| 9659 | 10348906 | <a href="#">NM_001039219</a>       | <a href="#">619597</a> | predicted gene, EG619597        | <a href="#">EG619597</a>      | 0.99 | 0.076  | 0.941754 | 0.977585 |
| 9660 | 10477966 | <a href="#">NM_026968</a>          | <a href="#">69161</a>  | mannosidase, beta A, lysosomal  | <a href="#">Manbal</a>        | 0.99 | -0.052 | 0.96007  | 0.985    |
| 9661 | 10517996 | <a href="#">ENSMUST00000084203</a> | <a href="#">69582</a>  | pleckstrin homology domain con  | <a href="#">Plekhh2</a>       | 0.99 | -0.04  | 0.969099 | 0.987586 |
| 9662 | 10471438 | <a href="#">NM_010073</a>          | <a href="#">13481</a>  | dolichol-phosphate (beta-D) ma  | <a href="#">Dpm2</a>          | 0.99 | -0.558 | 0.593717 | 0.808186 |
| 9663 | 10403748 |                                    |                        |                                 |                               | 0.99 | 0.192  | 0.853232 | 0.940713 |
| 9664 | 10395064 | <a href="#">NM_201357</a>          | <a href="#">380752</a> | tumor suppressing subtransfera  | <a href="#">Tsse1</a>         | 0.99 | -0.349 | 0.737277 | 0.887888 |
| 9665 | 10583496 | <a href="#">NM_145610</a>          | <a href="#">235036</a> | peter pan homolog (Drosophila)  | <a href="#">Ppan</a>          | 0.99 | -0.476 | 0.648342 | 0.841814 |
| 9666 | 10529375 | <a href="#">NM_010753</a>          | <a href="#">17122</a>  | Max dimerization protein 4      | <a href="#">Mxd4</a>          | 0.99 | -0.232 | 0.822654 | 0.929111 |
| 9667 | 10347427 | <a href="#">NM_175031</a>          | <a href="#">269209</a> | serine/threonine kinase 36 (fu  | <a href="#">Stk36</a>         | 0.99 | -0.075 | 0.942635 | 0.977825 |
| 9668 | 10464572 | <a href="#">NM_133666</a>          | <a href="#">17995</a>  | NADH dehydrogenase (ubiquinone  | <a href="#">Ndufv1</a>        | 0.99 | -0.553 | 0.596696 | 0.81005  |
| 9669 | 10401136 | <a href="#">XR_032827</a>          | <a href="#">230765</a> | similar to histone deacetylase  | <a href="#">LOC230765</a>     | 0.99 | -0.563 | 0.590463 | 0.806248 |
| 9670 | 10429462 | <a href="#">BC111897</a>           | <a href="#">69439</a>  | RIKEN cDNA 1700016M24 gene      | <a href="#">1700016M24Rik</a> | 0.99 | 0.001  | 0.999089 | 0.999589 |
| 9671 | 10446715 | <a href="#">NM_177087</a>          | <a href="#">320159</a> | RIKEN cDNA 4632412N22 gene      | <a href="#">4632412N22Rik</a> | 0.99 | -0.127 | 0.902335 | 0.961642 |
| 9672 | 10573198 | <a href="#">NM_018808</a>          | <a href="#">81489</a>  | DnaJ (Hsp40) homolog, subfamil  | <a href="#">Dnajb1</a>        | 0.99 | -0.424 | 0.684158 | 0.86012  |

|      |          |                                    |                           |                                    |                                    |       |        |          |          |
|------|----------|------------------------------------|---------------------------|------------------------------------|------------------------------------|-------|--------|----------|----------|
| 9673 | 10376721 | <a href="#">NM_001085440</a>       | <a href="#">237782</a>    | Smith-Magenis syndrome<br>chromos  | <a href="#">Smer8</a>              | 0.99  | -0.644 | 0.539449 | 0.772177 |
| 9674 | 10537880 |                                    |                           |                                    |                                    | 0.99  | 0.93   | 0.382525 | 0.65196  |
| 9675 | 10594418 | <a href="#">NM_008542</a>          | <a href="#">17130</a>     | MAD homolog 6 (Drosophila)         | <a href="#">Smad6</a>              | 0.99  | -0.418 | 0.688373 | 0.862969 |
| 9676 | 10471703 | <a href="#">BC036965</a>           | <a href="#">75495</a>     | RIKEN cDNA 1700010A17<br>gene      | <a href="#">1700010A17Rik</a>      | 0.99  | 0.144  | 0.889432 | 0.956457 |
| 9677 | 10426298 |                                    |                           |                                    |                                    | 0.99  | -0.217 | 0.834005 | 0.933071 |
| 9678 | 10471535 | <a href="#">BC027843</a>           | <a href="#">227737</a>    | RIKEN cDNA 9130404D14<br>gene      | <a href="#">9130404D14Rik</a>      | 0.99  | -0.425 | 0.683028 | 0.859827 |
| 9679 | 10579486 | <a href="#">NM_181418</a>          | <a href="#">234395</a>    | Usher syndrome 1C binding prot     | <a href="#">Ushbp1</a>             | 0.989 | 0.177  | 0.864158 | 0.94589  |
| 9680 | 10419267 | <a href="#">NM_009919</a>          | <a href="#">12793</a>     | cornichon homolog (Drosophila)     | <a href="#">Cnih</a>               | 0.989 | -0.784 | 0.458017 | 0.713341 |
| 9681 | 10469611 | <a href="#">XR_035323</a>          | <a href="#">442817</a>    | RIKEN cDNA C130046B21<br>gene      | <a href="#">C130046B21Rik</a>      | 0.989 | 0.115  | 0.911353 | 0.964566 |
| 9682 | 10505145 | <a href="#">NM_001037127</a>       | <a href="#">18198</a>     | muscle, skeletal, receptor tyr     | <a href="#">Musk</a>               | 0.989 | -0.212 | 0.837932 | 0.934421 |
| 9683 | 10477264 | <a href="#">NM_133847</a>          | <a href="#">99237</a>     | transmembrane 9 superfamily pr     | <a href="#">Tm9sf4</a>             | 0.989 | -0.53  | 0.612288 | 0.820234 |
| 9684 | 10479794 | <a href="#">NM_026045</a>          | <a href="#">67229</a>     | PRP18 pre-mRNA processing<br>fact  | <a href="#">Prpf18</a>             | 0.989 | -0.453 | 0.663785 | 0.850267 |
| 9685 | 10532618 | <a href="#">XM_912851</a>          | <a href="#">74376</a>     | myosin XVIIIb                      | <a href="#">Myo18b</a>             | 0.989 | -0.3   | 0.772615 | 0.906407 |
| 9686 | 10579165 | <a href="#">NM_007789</a>          | <a href="#">13004</a>     | neurocan                           | <a href="#">Ncan</a>               | 0.989 | -0.314 | 0.762263 | 0.901088 |
| 9687 | 10528922 | <a href="#">XR_001540</a>          | <a href="#">242914</a>    | predicted gene, EG242914           | <a href="#">EG242914</a>           | 0.989 | -0.175 | 0.86587  | 0.94648  |
| 9688 | 10383991 |                                    |                           |                                    |                                    | 0.989 | -0.203 | 0.844637 | 0.93694  |
| 9689 | 10525296 | <a href="#">NM_028227</a>          | <a href="#">72399</a>     | BRCA1 associated protein           | <a href="#">Brap</a>               | 0.989 | -0.385 | 0.711443 | 0.873563 |
| 9690 | 10524227 |                                    |                           |                                    |                                    | 0.989 | -0.614 | 0.558347 | 0.78605  |
| 9691 | 10382571 |                                    |                           |                                    |                                    | 0.989 | 0.309  | 0.765899 | 0.902563 |
| 9692 | 10580534 |                                    |                           |                                    |                                    | 0.989 | -0.711 | 0.499175 | 0.742494 |
| 9693 | 10433228 | <a href="#">NM_029738</a>          | <a href="#">76779</a>     | clusterin associated protein 1     | <a href="#">Cluap1</a>             | 0.989 | -0.627 | 0.55023  | 0.780495 |
| 9694 | 10514919 | <a href="#">ENSMUST00000069271</a> | <a href="#">56296</a>     | DMRT-like family B with prolin     | <a href="#">Dmrtb1</a>             | 0.989 | -0.349 | 0.737244 | 0.887888 |
| 9695 | 10607473 | <a href="#">XM_911239</a>          | <a href="#">270667</a>    | gene model 650, (NCBI)             | <a href="#">Gm650</a>              | 0.989 | 0.053  | 0.959116 | 0.98454  |
| 9696 | 10361698 | <a href="#">NM_172785</a>          | <a href="#">237256</a>    | zinc finger CCCH type containi     | <a href="#">Zc3h12d</a>            | 0.989 | -0.078 | 0.93981  | 0.976619 |
| 9697 | 10576118 | <a href="#">ENSMUST00000059529</a> | <a href="#">319574</a>    | RIKEN cDNA 9330133O14<br>gene      | <a href="#">9330133O14Rik</a>      | 0.989 | -0.502 | 0.630583 | 0.831653 |
| 9698 | 10551273 | <a href="#">NM_013809</a>          | <a href="#">13108</a>     | cytochrome P450, family 2, sub     | <a href="#">Cyp2g1</a>             | 0.989 | -0.162 | 0.875828 | 0.950887 |
| 9699 | 10569152 | <a href="#">NM_172116</a>          | <a href="#">213350</a>    | Parkinson disease 7 domain con     | <a href="#">Pdcl1</a>              | 0.989 | -0.263 | 0.799762 | 0.919181 |
| 9700 | 10607950 |                                    |                           |                                    |                                    | 0.989 | -0.244 | 0.814113 | 0.925212 |
| 9701 | 10424624 | <a href="#">NM_174991</a>          | <a href="#">107831</a>    | brain-specific angiogenesis in     | <a href="#">Bai1</a>               | 0.989 | -0.025 | 0.980436 | 0.991919 |
| 9702 | 10562634 | <a href="#">XR_031546</a>          | <a href="#">637913</a>    | predicted gene, EG637913           | <a href="#">EG637913</a>           | 0.989 | 0.19   | 0.854396 | 0.94105  |
| 9703 | 10489566 | <a href="#">NM_001082974</a>       | <a href="#">415115</a>    | neuralized-like 2 (Drosophila)     | <a href="#">Neur12</a>             | 0.989 | 0.043  | 0.967018 | 0.986963 |
| 9704 | 10482434 | <a href="#">NM_172662</a>          | <a href="#">227835</a>    | glycosyltransferase-like domai     | <a href="#">Gtcl1</a>              | 0.989 | -0.877 | 0.408747 | 0.673095 |
| 9705 | 10593903 | <a href="#">NM_025417</a>          | <a href="#">66199</a>     | COMM domain containing 4           | <a href="#">Comm4</a>              | 0.989 | -0.439 | 0.673779 | 0.855069 |
| 9706 | 10378271 | <a href="#">NM_025818</a>          | <a href="#">66874</a>     | RIKEN cDNA 1200014J11 gene         | <a href="#">1200014J11Rik</a>      | 0.989 | -0.513 | 0.623251 | 0.827713 |
| 9707 | 10509590 | <a href="#">NM_012044</a>          | <a href="#">26970</a>     | phospholipase A2, group IIE        | <a href="#">Pla2g2e</a>            | 0.989 | 0.168  | 0.871046 | 0.948568 |
| 9708 | 10424577 | <a href="#">NM_053068</a>          | <a href="#">93696</a>     | chromatin accessibility comple     | <a href="#">Chrac1</a>             | 0.989 | -1.005 | 0.347506 | 0.621575 |
| 9709 | 10558847 | <a href="#">BC145719</a>           | <a href="#">101471</a>    | expressed sequence AA673488        | <a href="#">AA673488</a>           | 0.989 | -0.54  | 0.605669 | 0.81605  |
| 9710 | 10465054 | <a href="#">NM_198616</a>          | <a href="#">240514</a>    | coiled-coil domain containing      | <a href="#">Ccdc85b</a>            | 0.989 | -0.355 | 0.733059 | 0.88559  |
| 9711 | 10595798 | <a href="#">BC035950</a>           | <a href="#">270185</a>    | cDNA sequence BC043934             | <a href="#">BC043934</a>           | 0.989 | 0.318  | 0.759437 | 0.899229 |
| 9712 | 10491252 | <a href="#">NM_029489</a>          | <a href="#">75953</a>     | sterile alpha motif domain con     | <a href="#">Samd7</a>              | 0.989 | -0.31  | 0.765247 | 0.90237  |
| 9713 | 10497636 | <a href="#">XR_002334</a>          | <a href="#">320352</a>    | leucine rich repeat containing     | <a href="#">Lrrc31</a>             | 0.989 | -0.101 | 0.92218  | 0.968977 |
| 9714 | 10364950 | <a href="#">NM_008655</a>          | <a href="#">17873</a>     | growth arrest and DNA-damage-<br>i | <a href="#">Gadd45b</a>            | 0.989 | -0.555 | 0.595816 | 0.809631 |
| 9715 | 10365971 | <a href="#">NM_007569</a>          | <a href="#">12226</a>     | B-cell translocation gene 1, a     | <a href="#">Btg1</a>               | 0.989 | -0.217 | 0.833948 | 0.933071 |
| 9716 | 10370603 | <a href="#">NM_001033473</a>       | <a href="#">382384</a>    | gene model 1157, (NCBI)            | <a href="#">Gm1157</a>             | 0.989 | -0.51  | 0.625125 | 0.829015 |
| 9717 | 10474234 | <a href="#">BC048438</a>           | <a href="#">68243</a>     | RIKEN cDNA A930018P22<br>gene      | <a href="#">A930018P22Rik</a>      | 0.989 | -0.453 | 0.663739 | 0.850267 |
| 9718 | 10581033 | <a href="#">ENSMUST00000087562</a> | <a href="#">100038620</a> | predicted gene,<br>ENSMUSG0000007  | <a href="#">ENSMUSG00000074128</a> | 0.989 | -0.274 | 0.791708 | 0.915198 |
| 9719 | 10352292 | <a href="#">ENSMUST00000097448</a> | <a href="#">666457</a>    | predicted gene, EG666457           | <a href="#">EG666457</a>           | 0.989 | -0.427 | 0.681991 | 0.85946  |
| 9720 | 10438091 | <a href="#">BC039993</a>           | <a href="#">70458</a>     | RIKEN cDNA 2610318N02<br>gene      | <a href="#">2610318N02Rik</a>      | 0.989 | 0.194  | 0.851811 | 0.940193 |
| 9721 | 10513622 | <a href="#">NM_021498</a>          | <a href="#">59001</a>     | polymerase (DNA directed), eps     | <a href="#">Pole3</a>              | 0.989 | -0.34  | 0.743379 | 0.89069  |
| 9722 | 10566050 | <a href="#">NM_010531</a>          | <a href="#">16068</a>     | interleukin 18 binding protein     | <a href="#">Il18bp</a>             | 0.989 | 0.408  | 0.694891 | 0.866071 |

|      |          |                                    |                           |                                   |                                    |       |        |          |          |
|------|----------|------------------------------------|---------------------------|-----------------------------------|------------------------------------|-------|--------|----------|----------|
| 9723 | 10432488 | <a href="#">NM_029236</a>          | <a href="#">75284</a>     | BCDIN3 domain containing          | <a href="#">Bcdin3d</a>            | 0.989 | -0.469 | 0.653099 | 0.844553 |
| 9724 | 10517988 | <a href="#">NM_001013780</a>       | <a href="#">384071</a>    | solute carrier family 25, memb    | <a href="#">Slc25a34</a>           | 0.989 | -0.035 | 0.972912 | 0.98829  |
| 9725 | 10387516 | <a href="#">NM_011367</a>          | <a href="#">20415</a>     | sex hormone binding globulin      | <a href="#">Shbg</a>               | 0.989 | 0.152  | 0.88361  | 0.954141 |
| 9726 | 10577471 | <a href="#">NM_177898</a>          | <a href="#">330721</a>    | NIMA (never in mitosis gene a)    | <a href="#">Nek5</a>               | 0.989 | -0.216 | 0.834836 | 0.933323 |
| 9727 | 10373179 | <a href="#">NM_010296</a>          | <a href="#">14632</a>     | GLI-Kruppel family member<br>GLI1 | <a href="#">Gli1</a>               | 0.989 | -0.224 | 0.828721 | 0.931153 |
| 9728 | 10346260 | <a href="#">NM_028091</a>          | <a href="#">72085</a>     | O-sialoglycoprotein endopeptid    | <a href="#">Osgepl1</a>            | 0.989 | -0.216 | 0.834725 | 0.933323 |
| 9729 | 10589685 | <a href="#">NM_028838</a>          | <a href="#">74249</a>     | leucine rich repeat containing    | <a href="#">Lrrc2</a>              | 0.989 | -0.138 | 0.894284 | 0.958327 |
| 9730 | 10551526 | <a href="#">NM_177396</a>          | <a href="#">338374</a>    | interleukin 28B                   | <a href="#">Il28b</a>              | 0.989 | -0.148 | 0.886487 | 0.955393 |
| 9731 | 10605943 | <a href="#">NM_028303</a>          | <a href="#">72621</a>     | PDZ domain containing 11          | <a href="#">Pdzd11</a>             | 0.989 | -0.709 | 0.50084  | 0.743872 |
| 9732 | 10600539 | <a href="#">BC127031</a>           | <a href="#">17143</a>     | melanoma antigen, family A, 7     | <a href="#">Magea7</a>             | 0.989 | 0.058  | 0.955418 | 0.982946 |
| 9733 | 10526654 | <a href="#">XR_001865</a>          | <a href="#">640050</a>    | predicted gene, EG640050          | <a href="#">EG640050</a>           | 0.989 | -0.245 | 0.81291  | 0.924742 |
| 9734 | 10550029 | <a href="#">NM_022981</a>          | <a href="#">65020</a>     | zinc finger protein 110           | <a href="#">Zfp110</a>             | 0.989 | -0.702 | 0.504483 | 0.746712 |
| 9735 | 10415392 | <a href="#">NM_008519</a>          | <a href="#">16995</a>     | leukotriene B4 receptor 1         | <a href="#">Ltb4r1</a>             | 0.989 | -0.194 | 0.851839 | 0.940193 |
| 9736 | 10432267 | <a href="#">NM_011718</a>          | <a href="#">22410</a>     | wingless related MMTV integrat    | <a href="#">Wnt10b</a>             | 0.989 | -0.126 | 0.902986 | 0.962141 |
| 9737 | 10401359 | <a href="#">NM_058212</a>          | <a href="#">70127</a>     | D4, zinc and double PHD finger    | <a href="#">Dpf3</a>               | 0.989 | -0.674 | 0.521213 | 0.758676 |
| 9738 | 10447695 |                                    |                           |                                   |                                    | 0.989 | 0.217  | 0.834177 | 0.933071 |
| 9739 | 10444879 | <a href="#">NM_020576</a>          | <a href="#">57390</a>     | psoriasis susceptibility 1 can    | <a href="#">Psors1c2</a>           | 0.989 | 0.324  | 0.755343 | 0.897145 |
| 9740 | 10419759 | <a href="#">NM_013768</a>          | <a href="#">27374</a>     | protein arginine N-methyltrans    | <a href="#">Prmt5</a>              | 0.989 | -0.465 | 0.655328 | 0.845667 |
| 9741 | 10567522 | <a href="#">XM_355934</a>          | <a href="#">381917</a>    | dynein, axonemal, heavy chain     | <a href="#">Dnahc3</a>             | 0.989 | 0.206  | 0.842585 | 0.936186 |
| 9742 | 10501117 | <a href="#">NM_026261</a>          | <a href="#">67591</a>     | ubiquitin-like 4B                 | <a href="#">Ubl4b</a>              | 0.989 | -0.199 | 0.847618 | 0.938277 |
| 9743 | 10508089 | <a href="#">NM_025544</a>          | <a href="#">66407</a>     | mitochondrial ribosomal protei    | <a href="#">Mrps15</a>             | 0.989 | -0.975 | 0.360906 | 0.632595 |
| 9744 | 10501286 | <a href="#">NM_175183</a>          | <a href="#">72522</a>     | ataxin 7-like 2                   | <a href="#">Atxn7l2</a>            | 0.989 | -0.45  | 0.66579  | 0.851116 |
| 9745 | 10578547 | <a href="#">NM_173789</a>          | <a href="#">234219</a>    | Hey-like transcription factor     | <a href="#">Helt</a>               | 0.989 | -0.362 | 0.728066 | 0.882032 |
| 9746 | 10491455 | <a href="#">NM_001113188</a>       | <a href="#">14359</a>     | fragile X mental retardation g    | <a href="#">Fxr1</a>               | 0.989 | -0.434 | 0.676805 | 0.856344 |
| 9747 | 10500404 |                                    |                           |                                   |                                    | 0.989 | 0.019  | 0.985639 | 0.994007 |
| 9748 | 10521088 | <a href="#">ENSMUST00000101353</a> | <a href="#">100038624</a> | predicted gene,<br>ENSMUSG0000007 | <a href="#">ENSMUSG00000073044</a> | 0.989 | -0.384 | 0.711749 | 0.873734 |
| 9749 | 10476689 | <a href="#">ENSMUST00000099289</a> | <a href="#">668917</a>    | similar to Zinc finger protein    | <a href="#">LOC668917</a>          | 0.989 | -0.347 | 0.738572 | 0.88853  |
| 9750 | 10409063 |                                    |                           |                                   |                                    | 0.989 | 0.404  | 0.697779 | 0.867515 |
| 9751 | 10468200 | <a href="#">NM_024192</a>          | <a href="#">67116</a>     | CUE domain containing 2           | <a href="#">Cuede2</a>             | 0.989 | -0.492 | 0.637399 | 0.835535 |
| 9752 | 10518955 | <a href="#">ENSMUST00000097768</a> | <a href="#">407834</a>    | cDNA sequence BC049688            | <a href="#">BC049688</a>           | 0.989 | -0.011 | 0.991533 | 0.996624 |
| 9753 | 10539592 | <a href="#">NM_144918</a>          | <a href="#">232187</a>    | SET and MYND domain<br>containing | <a href="#">Smyd5</a>              | 0.989 | -0.738 | 0.483699 | 0.732303 |
| 9754 | 10509985 | <a href="#">NM_001085513</a>       | <a href="#">277743</a>    | gene model 693 (NCBI)             | <a href="#">Gm693</a>              | 0.989 | -0.173 | 0.867506 | 0.946957 |
| 9755 | 10474057 | <a href="#">BC100298</a>           | <a href="#">433456</a>    | RIKEN cDNA 4631405J19 gene        | <a href="#">4631405J19Rik</a>      | 0.989 | -0.037 | 0.971327 | 0.988148 |
| 9756 | 10357436 | <a href="#">NM_008567</a>          | <a href="#">17219</a>     | minichromosome maintenance<br>def | <a href="#">Mcm6</a>               | 0.989 | -0.971 | 0.362944 | 0.63431  |
| 9757 | 10591497 | <a href="#">NM_145416</a>          | <a href="#">215194</a>    | KRII homolog (S. cerevisiae)      | <a href="#">Kri1</a>               | 0.989 | -0.328 | 0.752114 | 0.895422 |
| 9758 | 10557394 | <a href="#">BC042743</a>           | <a href="#">233865</a>    | RIKEN cDNA D430042O09<br>gene     | <a href="#">D430042O09Rik</a>      | 0.989 | -0.254 | 0.806313 | 0.921832 |
| 9759 | 10381133 | <a href="#">NM_025727</a>          | <a href="#">66720</a>     | kelch-like 10 (Drosophila)        | <a href="#">Kihl10</a>             | 0.989 | -0.009 | 0.992777 | 0.99722  |
| 9760 | 10441161 | <a href="#">NM_008251</a>          | <a href="#">15312</a>     | high mobility group nucleosoma    | <a href="#">Hmgn1</a>              | 0.989 | -0.192 | 0.85338  | 0.940713 |
| 9761 | 10481759 | <a href="#">NM_019488</a>          | <a href="#">56017</a>     | solute carrier family 2, (faci    | <a href="#">Slc2a8</a>             | 0.989 | -0.658 | 0.530819 | 0.76539  |
| 9762 | 10498623 | <a href="#">NM_008467</a>          | <a href="#">16649</a>     | karyopherin (importin) alpha 4    | <a href="#">Kpna4</a>              | 0.989 | -0.675 | 0.520457 | 0.757993 |
| 9763 | 10477887 | <a href="#">BC020112</a>           | <a href="#">68295</a>     | RIKEN cDNA 0610011L14 gene        | <a href="#">0610011L14Rik</a>      | 0.989 | -0.49  | 0.638854 | 0.835923 |
| 9764 | 10512098 | <a href="#">NM_025545</a>          | <a href="#">66408</a>     | aprataxin                         | <a href="#">Aptx</a>               | 0.989 | -0.43  | 0.679781 | 0.85785  |
| 9765 | 10428209 | <a href="#">ENSMUST00000100713</a> | <a href="#">100038735</a> | predicted gene,<br>ENSMUSG0000007 | <a href="#">ENSMUSG00000072618</a> | 0.989 | 0.093  | 0.928706 | 0.971962 |
| 9766 | 10397002 | <a href="#">NM_172579</a>          | <a href="#">217692</a>    | signal-induced proliferation-a    | <a href="#">Sipa1l1</a>            | 0.988 | -0.256 | 0.805069 | 0.921124 |
| 9767 | 10350710 | <a href="#">BC113157</a>           | <a href="#">71836</a>     | RIKEN cDNA 1700012A16<br>gene     | <a href="#">1700012A16Rik</a>      | 0.988 | -0.249 | 0.810284 | 0.923493 |
| 9768 | 10575074 | <a href="#">NM_173037</a>          | <a href="#">272538</a>    | transmembrane and coiled-coil     | <a href="#">Tmco7</a>              | 0.988 | -0.248 | 0.810801 | 0.923749 |
| 9769 | 10592752 | <a href="#">NM_133226</a>          | <a href="#">170761</a>    | PDZ domain containing 3           | <a href="#">Pdzd3</a>              | 0.988 | 0.058  | 0.955485 | 0.98296  |
| 9770 | 10588482 | <a href="#">NM_027354</a>          | <a href="#">70235</a>     | WD repeat domain 51A              | <a href="#">Wdr51a</a>             | 0.988 | -0.64  | 0.542067 | 0.774475 |
| 9771 | 10449547 |                                    |                           |                                   |                                    | 0.988 | -0.176 | 0.864773 | 0.946153 |
| 9772 | 10370931 | <a href="#">NM_021462</a>          | <a href="#">17347</a>     | MAP kinase-interacting serine/    | <a href="#">Mknk2</a>              | 0.988 | -0.234 | 0.821136 | 0.92863  |
| 9773 | 10394075 | <a href="#">NM_027622</a>          | <a href="#">70956</a>     | RIKEN cDNA 4921530G04<br>gene     | <a href="#">4921530G04Rik</a>      | 0.988 | 0.283  | 0.784989 | 0.912507 |

|      |          |                                    |                           | gene                              |                                    |       |        |          |          |
|------|----------|------------------------------------|---------------------------|-----------------------------------|------------------------------------|-------|--------|----------|----------|
| 9774 | 10571958 | <a href="#">NM_021506</a>          | <a href="#">59009</a>     | SH3 domain containing ring fin    | <a href="#">Sh3rf1</a>             | 0.988 | -0.445 | 0.669299 | 0.852817 |
| 9775 | 10519239 | <a href="#">ENSMUST00000097733</a> | <a href="#">100038526</a> | predicted gene,<br>ENSMUSG0000007 | <a href="#">ENSMUSG00000073673</a> | 0.988 | 0.199  | 0.847976 | 0.938472 |
| 9776 | 10476834 | <a href="#">NM_011917</a>          | <a href="#">24128</a>     | 5'-3' exoribonuclease 2           | <a href="#">Xrn2</a>               | 0.988 | -0.632 | 0.546758 | 0.777971 |
| 9777 | 10566350 | <a href="#">NM_175648</a>          | <a href="#">244183</a>    | RIKEN cDNA A530023O14<br>gene     | <a href="#">A530023O14Rik</a>      | 0.988 | 0.141  | 0.891731 | 0.957629 |
| 9778 | 10518967 | <a href="#">ENSMUST00000097764</a> | <a href="#">68859</a>     | RIKEN cDNA 1190007F08 gene        | <a href="#">1190007F08Rik</a>      | 0.988 | -0.37  | 0.721739 | 0.878906 |
| 9779 | 10407346 |                                    |                           |                                   |                                    | 0.988 | -0.405 | 0.696984 | 0.867134 |
| 9780 | 10386455 | <a href="#">NM_009026</a>          | <a href="#">19416</a>     | RAS, dexamethasone-induced 1      | <a href="#">Rasd1</a>              | 0.988 | -0.293 | 0.777979 | 0.909621 |
| 9781 | 10466302 |                                    |                           |                                   |                                    | 0.988 | 0.186  | 0.857874 | 0.942819 |
| 9782 | 10555378 | <a href="#">NM_009464</a>          | <a href="#">22229</a>     | uncoupling protein 3 (mitochon    | <a href="#">Ucp3</a>               | 0.988 | -0.237 | 0.819407 | 0.928264 |
| 9783 | 10492951 |                                    |                           |                                   |                                    | 0.988 | 0.188  | 0.856268 | 0.941981 |
| 9784 | 10356353 | <a href="#">NM_007433</a>          | <a href="#">11650</a>     | alkaline phosphatase 5            | <a href="#">Akp5</a>               | 0.988 | 0.009  | 0.993446 | 0.997551 |
| 9785 | 10512688 | <a href="#">BC094565</a>           | <a href="#">269529</a>    | F-box protein 10                  | <a href="#">Fbxo10</a>             | 0.988 | -0.219 | 0.832557 | 0.932679 |
| 9786 | 10496742 | <a href="#">NM_025555</a>          | <a href="#">66421</a>     | RIKEN cDNA 2410004B18<br>gene     | <a href="#">2410004B18Rik</a>      | 0.988 | -0.449 | 0.666612 | 0.851355 |
| 9787 | 10349348 | <a href="#">NM_001025156</a>       | <a href="#">70829</a>     | coiled-coil domain containing     | <a href="#">Ccdc93</a>             | 0.988 | -0.168 | 0.870896 | 0.948568 |
| 9788 | 10408787 |                                    |                           |                                   |                                    | 0.988 | -0.129 | 0.901133 | 0.961136 |
| 9789 | 10478580 | <a href="#">NM_133924</a>          | <a href="#">101113</a>    | sorting nexin family member 21    | <a href="#">Snx21</a>              | 0.988 | -0.109 | 0.916369 | 0.966925 |
| 9790 | 10583478 | <a href="#">NM_001030290</a>       | <a href="#">235033</a>    | retinol dehydrogenase 8           | <a href="#">Rdh8</a>               | 0.988 | 0.235  | 0.820466 | 0.928587 |
| 9791 | 10386394 | <a href="#">BC050078</a>           | <a href="#">237775</a>    | cDNA sequence BC050078            | <a href="#">BC050078</a>           | 0.988 | -0.395 | 0.704114 | 0.870478 |
| 9792 | 10560247 | <a href="#">NM_172297</a>          | <a href="#">243846</a>    | coiled-coil domain containing     | <a href="#">Ccdc9</a>              | 0.988 | 0.159  | 0.877906 | 0.951715 |
| 9793 | 10574617 | <a href="#">BC026374</a>           | <a href="#">234677</a>    | cDNA sequence BC026374            | <a href="#">BC026374</a>           | 0.988 | 0.002  | 0.998135 | 0.99936  |
| 9794 | 10399234 | <a href="#">NM_001082483</a>       | <a href="#">668212</a>    | EFR3 homolog B (S. cerevisiae)    | <a href="#">Efr3b</a>              | 0.988 | -0.504 | 0.629355 | 0.831277 |
| 9795 | 10568017 | <a href="#">NM_029420</a>          | <a href="#">75764</a>     | GIY-YIG domain containing 2       | <a href="#">Giyd2</a>              | 0.988 | -0.011 | 0.991654 | 0.99665  |
| 9796 | 10406777 | <a href="#">AK157788</a>           | <a href="#">218476</a>    | gene model 73, (NCBI)             | <a href="#">Gm73</a>               | 0.988 | 0.066  | 0.949488 | 0.98056  |
| 9797 | 10470564 | <a href="#">NM_009058</a>          | <a href="#">19730</a>     | ral guanine nucleotide dissoci    | <a href="#">Ralgeds</a>            | 0.988 | -0.236 | 0.819699 | 0.928319 |
| 9798 | 10394776 |                                    |                           |                                   |                                    | 0.988 | -0.392 | 0.706403 | 0.871814 |
| 9799 | 10387838 | <a href="#">NM_145684</a>          | <a href="#">11685</a>     | arachidonate lipoxygenase, epi    | <a href="#">Alox12e</a>            | 0.988 | 0.312  | 0.763967 | 0.90173  |
| 9800 | 10497754 | <a href="#">NM_026332</a>          | <a href="#">67713</a>     | DnaJ (Hsp40) homolog, subfamil    | <a href="#">Dnajc19</a>            | 0.988 | -0.814 | 0.44163  | 0.700534 |
| 9801 | 10581311 | <a href="#">NM_001012638</a>       | <a href="#">497652</a>    | adrenocortical dysplasia          | <a href="#">Acd</a>                | 0.988 | -0.47  | 0.652181 | 0.844159 |
| 9802 | 10347732 |                                    |                           |                                   |                                    | 0.988 | -0.522 | 0.617065 | 0.823029 |
| 9803 | 10555870 | <a href="#">NM_146813</a>          | <a href="#">258809</a>    | olfactory receptor 651            | <a href="#">Olfr651</a>            | 0.988 | -0.335 | 0.746804 | 0.892467 |
| 9804 | 10556458 | <a href="#">NM_175279</a>          | <a href="#">78748</a>     | Ras association (RalGDS/AF-6)     | <a href="#">Rassf10</a>            | 0.988 | -0.036 | 0.971922 | 0.988148 |
| 9805 | 10469923 | <a href="#">NM_028093</a>          | <a href="#">72090</a>     | ectonucleoside triphosphate di    | <a href="#">Entpd8</a>             | 0.988 | 0.215  | 0.835368 | 0.933323 |
| 9806 | 10490467 | <a href="#">NM_145851</a>          | <a href="#">252966</a>    | Cdk5 and Abl enzyme substrate     | <a href="#">Cables2</a>            | 0.988 | -0.776 | 0.462684 | 0.717151 |
| 9807 | 10579874 | <a href="#">NM_015751</a>          | <a href="#">24015</a>     | ATP-binding cassette, sub-fami    | <a href="#">Abcc1</a>              | 0.988 | -0.537 | 0.607736 | 0.817428 |
| 9808 | 10447773 | <a href="#">NM_011395</a>          | <a href="#">20519</a>     | solute carrier family 22 (orga    | <a href="#">Slc22a3</a>            | 0.988 | -0.224 | 0.828598 | 0.931115 |
| 9809 | 10598422 | <a href="#">NM_207670</a>          | <a href="#">54645</a>     | GRIP1 associated protein 1        | <a href="#">Gripap1</a>            | 0.988 | -0.514 | 0.622642 | 0.827306 |
| 9810 | 10543967 | <a href="#">NM_001081206</a>       | <a href="#">320127</a>    | diacylglycerol kinase, iota       | <a href="#">Dgki</a>               | 0.988 | -0.358 | 0.730618 | 0.883548 |
| 9811 | 10543231 |                                    |                           |                                   |                                    | 0.988 | -0.623 | 0.552188 | 0.782016 |
| 9812 | 10450482 |                                    |                           |                                   |                                    | 0.988 | 0.141  | 0.891659 | 0.957629 |
| 9813 | 10482237 | <a href="#">NM_139051</a>          | <a href="#">26423</a>     | nuclear receptor subfamily 5,     | <a href="#">Nr5a1</a>              | 0.988 | 0.275  | 0.790755 | 0.914692 |
| 9814 | 10370665 | <a href="#">NM_198107</a>          | <a href="#">216154</a>    | mediator complex subunit 16       | <a href="#">Med16</a>              | 0.988 | -0.465 | 0.655573 | 0.845931 |
| 9815 | 10463737 | <a href="#">AK144917</a>           | <a href="#">226180</a>    | internexin neuronal intermedia    | <a href="#">Ina</a>                | 0.988 | 0.058  | 0.955229 | 0.982897 |
| 9816 | 10595803 | <a href="#">NM_011279</a>          | <a href="#">19823</a>     | ring finger protein 7             | <a href="#">Rnf7</a>               | 0.988 | -0.089 | 0.931468 | 0.972759 |
| 9817 | 10535900 |                                    |                           |                                   |                                    | 0.988 | 0.133  | 0.897836 | 0.959787 |
| 9818 | 10382516 | <a href="#">NM_183285</a>          | <a href="#">70382</a>     | potassium channel tetramerisat    | <a href="#">Kctd2</a>              | 0.988 | -0.635 | 0.545299 | 0.777255 |
| 9819 | 10526566 | <a href="#">NM_010144</a>          | <a href="#">13846</a>     | Eph receptor B4                   | <a href="#">Ephb4</a>              | 0.988 | -0.434 | 0.677123 | 0.856541 |
| 9820 | 10499924 | <a href="#">NM_026811</a>          | <a href="#">68694</a>     | late cornified envelope 1E        | <a href="#">Lce1e</a>              | 0.988 | 0.193  | 0.852129 | 0.940318 |
| 9821 | 10507475 |                                    |                           |                                   |                                    | 0.988 | -0.193 | 0.852286 | 0.940441 |
| 9822 | 10405504 | <a href="#">NM_007596</a>          | <a href="#">12328</a>     | calcium modulating ligand         | <a href="#">Caml</a>               | 0.988 | -0.329 | 0.751476 | 0.895256 |
| 9823 | 10412177 | <a href="#">NM_028151</a>          | <a href="#">72198</a>     | superkiller viralicidic activi    | <a href="#">Skiv2l2</a>            | 0.988 | -0.588 | 0.574381 | 0.797076 |
| 9824 | 10537882 | <a href="#">NM_012042</a>          | <a href="#">26965</a>     | cullin 1                          | <a href="#">Cul1</a>               | 0.988 | -0.438 | 0.674367 | 0.855358 |
| 9825 | 10459866 | <a href="#">NM_028122</a>          | <a href="#">108052</a>    | solute carrier family 14 (urea    | <a href="#">Slc14a1</a>            | 0.988 | -0.056 | 0.956994 | 0.983559 |
| 9826 | 10442381 | <a href="#">NM_175440</a>          | <a href="#">213171</a>    | protease, serine 27               | <a href="#">Prss27</a>             | 0.988 | -0.08  | 0.938129 | 0.975903 |

|      |          |                                    |                           |                                |                                    |       |        |          |          |
|------|----------|------------------------------------|---------------------------|--------------------------------|------------------------------------|-------|--------|----------|----------|
| 9827 | 10379721 | <a href="#">NM_013652</a>          | <a href="#">20303</a>     | chemokine (C-C motif) ligand 4 | <a href="#">Ccl4</a>               | 0.988 | -0.139 | 0.892991 | 0.957774 |
| 9828 | 10606071 | <a href="#">NM_146235</a>          | <a href="#">236930</a>    | excision repair cross-compleme | <a href="#">Ercc6l</a>             | 0.988 | -0.184 | 0.859198 | 0.943452 |
| 9829 | 10449289 | <a href="#">ENSMUST00000011196</a> | <a href="#">73365</a>     | RIKEN cDNA 1700049J03 gene     | <a href="#">1700049J03Rik</a>      | 0.988 | -0.123 | 0.905777 | 0.963405 |
| 9830 | 10371037 | <a href="#">NM_134135</a>          | <a href="#">106947</a>    | solute carrier family 39 (zinc | <a href="#">Slc39a3</a>            | 0.988 | 0.092  | 0.928932 | 0.972036 |
| 9831 | 10359334 | <a href="#">NM_009786</a>          | <a href="#">12301</a>     | calyculin binding protein      | <a href="#">Cacybp</a>             | 0.988 | -0.771 | 0.465193 | 0.718903 |
| 9832 | 10486172 | <a href="#">NM_001033136</a>       | <a href="#">67809</a>     | RIKEN cDNA 1200015F23 gene     | <a href="#">1200015F23Rik</a>      | 0.988 | -0.423 | 0.684377 | 0.860314 |
| 9833 | 10494423 | <a href="#">NM_027126</a>          | <a href="#">69585</a>     | hemochromatosis type 2 (juveni | <a href="#">Hfe2</a>               | 0.988 | -0.209 | 0.84003  | 0.935328 |
| 9834 | 10493247 | <a href="#">NM_033526</a>          | <a href="#">94232</a>     | ubiquilin 4                    | <a href="#">Ubqln4</a>             | 0.988 | -0.081 | 0.937442 | 0.975553 |
| 9835 | 10399841 | <a href="#">NM_134048</a>          | <a href="#">104836</a>    | Casitas B-lineage lymphoma-lik | <a href="#">Cbl1</a>               | 0.988 | -0.573 | 0.583832 | 0.801645 |
| 9836 | 10455050 | <a href="#">NM_053127</a>          | <a href="#">93873</a>     | protocadherin beta 2           | <a href="#">Pcdhb2</a>             | 0.988 | -0.282 | 0.785762 | 0.912565 |
| 9837 | 10534148 | <a href="#">ENSMUST00000063656</a> | <a href="#">381673</a>    | RIKEN cDNA A330070K13 gene     | <a href="#">A330070K13Rik</a>      | 0.988 | 0.081  | 0.937574 | 0.975641 |
| 9838 | 10512827 | <a href="#">ENSMUST00000060283</a> | <a href="#">230143</a>    | gene model 568, (NCBI)         | <a href="#">Gm568</a>              | 0.988 | 0.084  | 0.935609 | 0.974509 |
| 9839 | 10416942 |                                    |                           |                                |                                    | 0.988 | -0.484 | 0.642795 | 0.838239 |
| 9840 | 10548180 | <a href="#">NM_133927</a>          | <a href="#">101142</a>    | integrin alpha FG-GAP repeat c | <a href="#">Itfg2</a>              | 0.988 | 0.014  | 0.988951 | 0.995308 |
| 9841 | 10409021 | <a href="#">NM_016785</a>          | <a href="#">22017</a>     | thiopurine methyltransferase   | <a href="#">Tpm1</a>               | 0.988 | -0.702 | 0.504821 | 0.747036 |
| 9842 | 10428204 | <a href="#">NM_011740</a>          | <a href="#">22631</a>     | tyrosine 3-monooxygenase/trypt | <a href="#">Ywhaz</a>              | 0.988 | -0.278 | 0.788584 | 0.913935 |
| 9843 | 10535524 | <a href="#">NM_033039</a>          | <a href="#">18261</a>     | oncomodulin                    | <a href="#">Ocm</a>                | 0.988 | 0.197  | 0.849137 | 0.939006 |
| 9844 | 10507572 | <a href="#">NM_146304</a>          | <a href="#">258301</a>    | olfactory receptor 1340        | <a href="#">Olfr1340</a>           | 0.988 | 0.05   | 0.961456 | 0.985172 |
| 9845 | 10436783 | <a href="#">NM_011434</a>          | <a href="#">20655</a>     | superoxide dismutase 1, solubl | <a href="#">Sod1</a>               | 0.988 | -0.411 | 0.693135 | 0.865508 |
| 9846 | 10581625 | <a href="#">BC039052</a>           | <a href="#">71955</a>     | RIKEN cDNA 2400003C14 gene     | <a href="#">2400003C14Rik</a>      | 0.988 | -0.299 | 0.773271 | 0.9067   |
| 9847 | 10552210 | <a href="#">NM_145633</a>          | <a href="#">245886</a>    | ankyrin repeat domain 27 (VPS9 | <a href="#">Ankrd27</a>            | 0.988 | -0.261 | 0.80132  | 0.919489 |
| 9848 | 10429538 | <a href="#">NM_001033229</a>       | <a href="#">110115</a>    | cytochrome P450, family 11, su | <a href="#">Cyp11b1</a>            | 0.988 | 0.08   | 0.938735 | 0.976177 |
| 9849 | 10559524 | <a href="#">NM_029834</a>          | <a href="#">232807</a>    | protein phosphatase 1, regulat | <a href="#">Ppp1r12c</a>           | 0.988 | -0.005 | 0.995769 | 0.998271 |
| 9850 | 10528102 | <a href="#">NM_023733</a>          | <a href="#">74114</a>     | carnitine O-octanoyltransferas | <a href="#">Crot</a>               | 0.988 | -0.766 | 0.468014 | 0.720506 |
| 9851 | 10495173 | <a href="#">NM_001039488</a>       | <a href="#">321000</a>    | RIKEN cDNA 4933421E11 gene     | <a href="#">4933421E11Rik</a>      | 0.987 | -0.717 | 0.495767 | 0.740536 |
| 9852 | 10502333 | <a href="#">ENSMUST00000116270</a> | <a href="#">100039350</a> | similar to Scoc protein        | <a href="#">LOC100039350</a>       | 0.987 | -0.059 | 0.954218 | 0.982421 |
| 9853 | 10574159 |                                    |                           |                                |                                    | 0.987 | -0.19  | 0.854729 | 0.941172 |
| 9854 | 10563764 | <a href="#">NM_207537</a>          | <a href="#">404238</a>    | MAS-related GPR, member B3     | <a href="#">Mrgprb3</a>            | 0.987 | -0.411 | 0.693042 | 0.865443 |
| 9855 | 10345404 | <a href="#">AK082264</a>           | <a href="#">241052</a>    | RIKEN cDNA C230030N03 gene     | <a href="#">C230030N03Rik</a>      | 0.987 | -0.042 | 0.967492 | 0.987099 |
| 9856 | 10371054 | <a href="#">NM_145365</a>          | <a href="#">208677</a>    | cAMP responsive element bindin | <a href="#">Creb3l3</a>            | 0.987 | -0.145 | 0.88854  | 0.956048 |
| 9857 | 10388784 | <a href="#">AF357367</a>           | <a href="#">268449</a>    | ribosomal protein L23a         | <a href="#">Rpl23a</a>             | 0.987 | 0.231  | 0.823848 | 0.929508 |
| 9858 | 10467842 | <a href="#">NM_010324</a>          | <a href="#">14718</a>     | glutamate oxaloacetate transam | <a href="#">Got1</a>               | 0.987 | -0.874 | 0.410226 | 0.674586 |
| 9859 | 10378787 | <a href="#">NM_177709</a>          | <a href="#">237858</a>    | tumor suppressor candidate 5   | <a href="#">Tusc5</a>              | 0.987 | -0.134 | 0.897192 | 0.95959  |
| 9860 | 10408056 | <a href="#">NM_146283</a>          | <a href="#">258280</a>    | olfactory receptor 1366        | <a href="#">Olfr1366</a>           | 0.987 | -0.096 | 0.926379 | 0.970777 |
| 9861 | 10385557 | <a href="#">NM_212484</a>          | <a href="#">104625</a>    | CCR4-NOT transcription complex | <a href="#">Cnot6</a>              | 0.987 | -0.445 | 0.669236 | 0.852817 |
| 9862 | 10554392 | <a href="#">NM_178752</a>          | <a href="#">269952</a>    | RIKEN cDNA D330012F22 gene     | <a href="#">D330012F22Rik</a>      | 0.987 | -0.191 | 0.853676 | 0.940747 |
| 9863 | 10350506 | <a href="#">NM_153539</a>          | <a href="#">215378</a>    | RIKEN cDNA B830045N13 gene     | <a href="#">B830045N13Rik</a>      | 0.987 | -0.086 | 0.93402  | 0.973771 |
| 9864 | 10589074 | <a href="#">ENSMUST00000098384</a> | <a href="#">100038635</a> | predicted gene, ENSMUSG0000007 | <a href="#">ENSMUSG00000074075</a> | 0.987 | -0.247 | 0.81173  | 0.923946 |
| 9865 | 10547171 | <a href="#">NM_146446</a>          | <a href="#">258438</a>    | olfactory receptor 215         | <a href="#">Olfr215</a>            | 0.987 | 0.212  | 0.837705 | 0.934421 |
| 9866 | 10360745 | <a href="#">NM_133815</a>          | <a href="#">98386</a>     | lamin B receptor               | <a href="#">Lbr</a>                | 0.987 | -0.208 | 0.841301 | 0.935777 |
| 9867 | 10416155 | <a href="#">NM_001111028</a>       | <a href="#">105440</a>    | potassium channel tetramerisat | <a href="#">Kctd9</a>              | 0.987 | -0.408 | 0.69502  | 0.866071 |
| 9868 | 10568296 |                                    |                           |                                |                                    | 0.987 | -0.168 | 0.870835 | 0.948568 |
| 9869 | 10345368 | <a href="#">ENSMUST00000097783</a> | <a href="#">52318</a>     | DNA segment, Chr 1, ERATO Doi  | <a href="#">D1Ert448e</a>          | 0.987 | 0.327  | 0.752771 | 0.89584  |
| 9870 | 10478109 | <a href="#">NM_145635</a>          | <a href="#">246747</a>    | cDNA sequence BC054059         | <a href="#">BC054059</a>           | 0.987 | -0.261 | 0.801482 | 0.919489 |
| 9871 | 10469732 | <a href="#">NM_013771</a>          | <a href="#">27377</a>     | YME1-like 1 (S. cerevisiae)    | <a href="#">Yme1l1</a>             | 0.987 | -0.849 | 0.423021 | 0.685287 |
| 9872 | 10519354 | <a href="#">NM_027777</a>          | <a href="#">71382</a>     | peroxisome biogenesis factor 1 | <a href="#">Pex1</a>               | 0.987 | -0.282 | 0.785734 | 0.912565 |
| 9873 | 10451061 | <a href="#">NM_009820</a>          | <a href="#">12393</a>     | runt related transcription fac | <a href="#">Runx2</a>              | 0.987 | 0.341  | 0.743155 | 0.890598 |
| 9874 | 10475941 | <a href="#">NM_178404</a>          | <a href="#">78751</a>     | zinc finger CCCH type containi | <a href="#">Zc3h6</a>              | 0.987 | 0.005  | 0.995833 | 0.998288 |
| 9875 | 10512093 | <a href="#">NM_001033305</a>       | <a href="#">230075</a>    | NADH dehydrogenase (ubiquinone | <a href="#">Ndufb6</a>             | 0.987 | -0.629 | 0.54902  | 0.779406 |
| 9876 | 10401296 | <a href="#">NM_080440</a>          | <a href="#">110893</a>    | solute carrier familv 8 (sodiu | <a href="#">Slc8a3</a>             | 0.987 | -0.081 | 0.93729  | 0.975526 |

|      |          |                                    |                           |                                    |                                    |       |        |          |          |
|------|----------|------------------------------------|---------------------------|------------------------------------|------------------------------------|-------|--------|----------|----------|
| 9877 | 10588655 | <a href="#">NM_053253</a>          | <a href="#">114602</a>    | zinc finger, MYND domain<br>conta  | <a href="#">Zmynd10</a>            | 0.987 | -0.049 | 0.962633 | 0.985423 |
| 9878 | 10528145 | <a href="#">NM_181850</a>          | <a href="#">108069</a>    | glutamate receptor, metabotrop     | <a href="#">Grm3</a>               | 0.987 | -0.171 | 0.868855 | 0.947499 |
| 9879 | 10539990 | <a href="#">NM_144940</a>          | <a href="#">243537</a>    | urocanase domain containing 1      | <a href="#">Uroc1</a>              | 0.987 | -0.011 | 0.991502 | 0.996624 |
| 9880 | 10452768 |                                    |                           |                                    |                                    | 0.987 | 0.023  | 0.982455 | 0.9924   |
| 9881 | 10526541 |                                    |                           |                                    |                                    | 0.987 | -0.234 | 0.821201 | 0.92863  |
| 9882 | 10426598 |                                    |                           |                                    |                                    | 0.987 | 0.134  | 0.897213 | 0.95959  |
| 9883 | 10511146 | <a href="#">ENSMUST00000067628</a> | <a href="#">70448</a>     | RIKEN cDNA 2610204G22<br>gene      | <a href="#">2610204G22Rik</a>      | 0.987 | -0.394 | 0.704752 | 0.871013 |
| 9884 | 10355639 | <a href="#">NM_153744</a>          | <a href="#">241113</a>    | protein kinase, AMP-activated,     | <a href="#">Prkag3</a>             | 0.987 | -0.069 | 0.946502 | 0.978837 |
| 9885 | 10350039 | <a href="#">NM_145510</a>          | <a href="#">98710</a>     | RAB interacting factor             | <a href="#">Rabif</a>              | 0.987 | -0.727 | 0.490269 | 0.737262 |
| 9886 | 10348062 | <a href="#">NM_145222</a>          | <a href="#">227327</a>    | UDP-GlcNAc:betaGal beta-1,3-<br>N- | <a href="#">B3gnt7</a>             | 0.987 | -0.131 | 0.899386 | 0.960245 |
| 9887 | 10437687 | <a href="#">NM_019980</a>          | <a href="#">56722</a>     | LPS-induced TN factor              | <a href="#">Litaf</a>              | 0.987 | -0.301 | 0.772213 | 0.906086 |
| 9888 | 10413609 | <a href="#">NM_181390</a>          | <a href="#">66175</a>     | musculoskeletal, embryonic nuc     | <a href="#">Mustn1</a>             | 0.987 | 0.219  | 0.833065 | 0.932765 |
| 9889 | 10524703 | <a href="#">NM_011223</a>          | <a href="#">19303</a>     | paxillin                           | <a href="#">Pxn</a>                | 0.987 | -0.522 | 0.617434 | 0.823037 |
| 9890 | 10546349 | <a href="#">NM_009531</a>          | <a href="#">22591</a>     | xeroderma pigmentosum,<br>complem  | <a href="#">Xpc</a>                | 0.987 | -0.23  | 0.824262 | 0.929508 |
| 9891 | 10468049 | <a href="#">NM_020032</a>          | <a href="#">56626</a>     | polymerase (DNA directed), lam     | <a href="#">Poll</a>               | 0.987 | -0.251 | 0.808617 | 0.922966 |
| 9892 | 10542040 | <a href="#">NM_181402</a>          | <a href="#">101187</a>    | poly (ADP-ribose) polymerase f     | <a href="#">Parp11</a>             | 0.987 | -0.974 | 0.361544 | 0.633294 |
| 9893 | 10576413 |                                    |                           |                                    |                                    | 0.987 | -0.264 | 0.799482 | 0.919009 |
| 9894 | 10517116 | <a href="#">NM_009097</a>          | <a href="#">20111</a>     | ribosomal protein S6 kinase po     | <a href="#">Rps6ka1</a>            | 0.987 | -0.108 | 0.916589 | 0.967047 |
| 9895 | 10553956 | <a href="#">NM_178056</a>          | <a href="#">68634</a>     | TM2 domain containing 3            | <a href="#">Tm2d3</a>              | 0.987 | -0.412 | 0.692017 | 0.864827 |
| 9896 | 10377612 | <a href="#">NM_023564</a>          | <a href="#">70310</a>     | phospholipid scramblase 3          | <a href="#">Plscr3</a>             | 0.987 | -0.203 | 0.844856 | 0.937    |
| 9897 | 10391130 | <a href="#">NM_026561</a>          | <a href="#">68106</a>     | 5'-nucleotidase, cytosolic III     | <a href="#">Nt5c3l</a>             | 0.987 | -0.691 | 0.511381 | 0.752366 |
| 9898 | 10592816 | <a href="#">NM_013551</a>          | <a href="#">15288</a>     | hydroxymethylbilane synthase       | <a href="#">Hmbs</a>               | 0.987 | -0.356 | 0.731734 | 0.884354 |
| 9899 | 10536527 | <a href="#">NM_007604</a>          | <a href="#">12343</a>     | capping protein (actin filamen     | <a href="#">Capza2</a>             | 0.987 | -0.759 | 0.471833 | 0.72372  |
| 9900 | 10428192 | <a href="#">NM_008774</a>          | <a href="#">18458</a>     | poly A binding protein, cytopl     | <a href="#">Pabpc1</a>             | 0.987 | -0.328 | 0.75209  | 0.895422 |
| 9901 | 10494910 | <a href="#">NM_026602</a>          | <a href="#">68183</a>     | breast carcinoma amplified seq     | <a href="#">Beas2</a>              | 0.987 | -0.605 | 0.563887 | 0.790376 |
| 9902 | 10536805 | <a href="#">NM_207258</a>          | <a href="#">330277</a>    | cDNA sequence BC048651             | <a href="#">BC048651</a>           | 0.987 | 0.007  | 0.99431  | 0.997705 |
| 9903 | 10531495 | <a href="#">ENSMUST00000064781</a> | <a href="#">330129</a>    | predicted gene, EG330129           | <a href="#">EG330129</a>           | 0.987 | 0.211  | 0.838508 | 0.934504 |
| 9904 | 10481122 | <a href="#">NM_009298</a>          | <a href="#">20935</a>     | surfeit gene 6                     | <a href="#">Surf6</a>              | 0.987 | -0.158 | 0.87917  | 0.952124 |
| 9905 | 10464452 | <a href="#">NM_009212</a>          | <a href="#">20589</a>     | immunoglobulin mu binding prot     | <a href="#">Ighmbp2</a>            | 0.987 | -0.071 | 0.945306 | 0.978439 |
| 9906 | 10534301 | <a href="#">NM_001013751</a>       | <a href="#">214292</a>    | gene model 52, (NCBI)              | <a href="#">Gm52</a>               | 0.987 | 0.114  | 0.912643 | 0.965173 |
| 9907 | 10507742 | <a href="#">NM_007741</a>          | <a href="#">12840</a>     | collagen, type IX, alpha 2         | <a href="#">Col9a2</a>             | 0.987 | 0.113  | 0.912748 | 0.965173 |
| 9908 | 10522666 | <a href="#">ENSMUST00000101090</a> | <a href="#">70284</a>     | RIKEN cDNA 2310040G07<br>gene      | <a href="#">2310040G07Rik</a>      | 0.987 | 0.241  | 0.816586 | 0.926829 |
| 9909 | 10504662 |                                    |                           |                                    |                                    | 0.987 | -0.008 | 0.994183 | 0.997702 |
| 9910 | 10526687 | <a href="#">BC052497</a>           | <a href="#">69871</a>     | RIKEN cDNA 2010007H12<br>gene      | <a href="#">2010007H12Rik</a>      | 0.987 | -0.088 | 0.931958 | 0.97291  |
| 9911 | 10423894 | <a href="#">NM_029422</a>          | <a href="#">75766</a>     | transmembrane 7 superfamily me     | <a href="#">Tm7sf4</a>             | 0.987 | -0.138 | 0.894242 | 0.958327 |
| 9912 | 10499996 | <a href="#">NM_029721</a>          | <a href="#">76742</a>     | sorting nexin family member 27     | <a href="#">Snx27</a>              | 0.987 | -0.971 | 0.362918 | 0.63431  |
| 9913 | 10449327 | <a href="#">NM_146075</a>          | <a href="#">224640</a>    | LEM domain containing 2            | <a href="#">Lemd2</a>              | 0.987 | -0.231 | 0.82346  | 0.929428 |
| 9914 | 10522868 | <a href="#">BC103787</a>           | <a href="#">73779</a>     | RIKEN cDNA 4930432K09<br>gene      | <a href="#">4930432K09Rik</a>      | 0.987 | -0.113 | 0.91341  | 0.965657 |
| 9915 | 10380403 | <a href="#">NM_133807</a>          | <a href="#">98238</a>     | leucine rich repeat containing     | <a href="#">Lrrc59</a>             | 0.987 | -0.676 | 0.519897 | 0.757566 |
| 9916 | 10476042 | <a href="#">NM_009374</a>          | <a href="#">21818</a>     | transglutaminase 3, E polypept     | <a href="#">Tgm3</a>               | 0.987 | -0.151 | 0.884385 | 0.95453  |
| 9917 | 10586416 | <a href="#">NM_172453</a>          | <a href="#">208084</a>    | PIF1 5'-to-3' DNA helicase hom     | <a href="#">Pif1</a>               | 0.987 | 0.037  | 0.971604 | 0.988148 |
| 9918 | 10354307 | <a href="#">ENSMUST00000030051</a> | <a href="#">22166</a>     | thioredoxin 1                      | <a href="#">Txn1</a>               | 0.986 | -0.336 | 0.746364 | 0.892337 |
| 9919 | 10559436 | <a href="#">NM_029934</a>          | <a href="#">77582</a>     | membrane bound O-<br>acyltransfera | <a href="#">Mboat7</a>             | 0.986 | -0.247 | 0.8117   | 0.923946 |
| 9920 | 10376938 | <a href="#">NM_025496</a>          | <a href="#">66338</a>     | CMT1A duplicated region transe     | <a href="#">Cdrt4</a>              | 0.986 | 0.236  | 0.820353 | 0.928562 |
| 9921 | 10494007 | <a href="#">NM_029431</a>          | <a href="#">75778</a>     | thioesterase superfamily membe     | <a href="#">Them4</a>              | 0.986 | -0.119 | 0.908424 | 0.963723 |
| 9922 | 10504914 |                                    |                           |                                    |                                    | 0.986 | -0.326 | 0.753578 | 0.896207 |
| 9923 | 10429327 | <a href="#">ENSMUST00000100562</a> | <a href="#">100038495</a> | predicted gene,<br>ENSMUSG0000007  | <a href="#">ENSMUSG00000072493</a> | 0.986 | -0.259 | 0.802817 | 0.920071 |
| 9924 | 10545897 | <a href="#">NM_028099</a>          | <a href="#">72102</a>     | dual specificity phosphatase 1     | <a href="#">Dusp11</a>             | 0.986 | -0.212 | 0.838331 | 0.934421 |
| 9925 | 10383360 | <a href="#">NM_152807</a>          | <a href="#">67291</a>     | coiled-coil domain containing      | <a href="#">Ccdc137</a>            | 0.986 | -0.348 | 0.737569 | 0.888107 |
| 9926 | 10375713 | <a href="#">NM_145926</a>          | <a href="#">103534</a>    | mannoside acetvlglucosaminyltr     | <a href="#">Mgat4b</a>             | 0.986 | -0.743 | 0.481164 | 0.730704 |

|      |          |                                    |                           |                                   |                                    |       |        |          |          |
|------|----------|------------------------------------|---------------------------|-----------------------------------|------------------------------------|-------|--------|----------|----------|
| 9927 | 10398483 | <a href="#">NM_030238</a>          | <a href="#">13424</a>     | dynein cytoplasmic 1 heavy cha    | <a href="#">Dync1h1</a>            | 0.986 | -0.78  | 0.460473 | 0.715038 |
| 9928 | 10578794 |                                    |                           |                                   |                                    | 0.986 | -0.329 | 0.751486 | 0.895256 |
| 9929 | 10391746 | <a href="#">ENSMUST00000069673</a> | <a href="#">100038535</a> | predicted gene,<br>ENSMUSG0000007 | <a href="#">ENSMUSG0000007516</a>  | 0.986 | -0.2   | 0.846635 | 0.937778 |
| 9930 | 10490104 | <a href="#">NM_011497</a>          | <a href="#">20878</a>     | aurora kinase A                   | <a href="#">Aurka</a>              | 0.986 | -0.639 | 0.542769 | 0.775164 |
| 9931 | 10428020 | <a href="#">NM_172606</a>          | <a href="#">223455</a>    | membrane-associated ring finge    | <a href="#">March6</a>             | 0.986 | -0.38  | 0.714753 | 0.875137 |
| 9932 | 10351500 |                                    |                           |                                   |                                    | 0.986 | 0.262  | 0.800384 | 0.919346 |
| 9933 | 10532616 | <a href="#">XM_912851</a>          | <a href="#">74376</a>     | myosin XVIIIb                     | <a href="#">Myo18b</a>             | 0.986 | -0.165 | 0.873344 | 0.949372 |
| 9934 | 10406017 | <a href="#">NM_018885</a>          | <a href="#">50916</a>     | Iroquois related homeobox 4 (D    | <a href="#">Irx4</a>               | 0.986 | 0.267  | 0.796769 | 0.917479 |
| 9935 | 10414978 | <a href="#">ENSMUST00000103673</a> | <a href="#">547427</a>    | predicted gene,<br>OTTMUSG0000001 | <a href="#">OTTMUSG00000015026</a> | 0.986 | -0.144 | 0.889306 | 0.956449 |
| 9936 | 10443332 | <a href="#">NM_011145</a>          | <a href="#">19015</a>     | peroxisome proliferator activa    | <a href="#">Ppard</a>              | 0.986 | -0.09  | 0.930795 | 0.972759 |
| 9937 | 10386427 | <a href="#">NM_146018</a>          | <a href="#">216805</a>    | folliculin                        | <a href="#">Flcn</a>               | 0.986 | -0.372 | 0.720339 | 0.878213 |
| 9938 | 10520211 | <a href="#">NM_139153</a>          | <a href="#">213990</a>    | centaurin, gamma 3                | <a href="#">Centg3</a>             | 0.986 | -0.535 | 0.608914 | 0.817955 |
| 9939 | 10565627 | <a href="#">NM_175105</a>          | <a href="#">66333</a>     | aquaporin 11                      | <a href="#">Aqp11</a>              | 0.986 | 0.051  | 0.960939 | 0.985069 |
| 9940 | 10573319 | <a href="#">NM_001013384</a>       | <a href="#">244550</a>    | podocan-like 1                    | <a href="#">Podnl1</a>             | 0.986 | -0.075 | 0.942451 | 0.977825 |
| 9941 | 10449940 | <a href="#">NM_022434</a>          | <a href="#">64385</a>     | cytochrome P450, family 4, sub    | <a href="#">Cyp4f14</a>            | 0.986 | -0.212 | 0.8377   | 0.934421 |
| 9942 | 10375811 |                                    |                           |                                   |                                    | 0.986 | 0.095  | 0.927156 | 0.971253 |
| 9943 | 10538850 |                                    |                           |                                   |                                    | 0.986 | -0.064 | 0.950833 | 0.981077 |
| 9944 | 10406718 | <a href="#">NM_172590</a>          | <a href="#">218460</a>    | WD repeat domain 41               | <a href="#">Wdr41</a>              | 0.986 | -0.447 | 0.66811  | 0.851935 |
| 9945 | 10478748 | <a href="#">NM_023815</a>          | <a href="#">76367</a>     | transformation related protein    | <a href="#">Trp53rk</a>            | 0.986 | -0.119 | 0.908784 | 0.963765 |
| 9946 | 10418971 | <a href="#">NM_013887</a>          | <a href="#">30044</a>     | opsin 4 (melanopsin)              | <a href="#">Opn4</a>               | 0.986 | -0.499 | 0.63268  | 0.832911 |
| 9947 | 10583529 | <a href="#">NM_023892</a>          | <a href="#">78369</a>     | intercellular adhesion molecul    | <a href="#">Icam4</a>              | 0.986 | -0.097 | 0.925077 | 0.970374 |
| 9948 | 10542093 | <a href="#">NM_021717</a>          | <a href="#">60345</a>     | nuclear receptor interacting p    | <a href="#">Nrip2</a>              | 0.986 | -0.444 | 0.669984 | 0.853279 |
| 9949 | 10567518 | <a href="#">XM_355934</a>          | <a href="#">381917</a>    | dynein, axonemal, heavy chain     | <a href="#">Dnahe3</a>             | 0.986 | -0.257 | 0.80441  | 0.920819 |
| 9950 | 10473750 | <a href="#">NM_026161</a>          | <a href="#">67445</a>     | C1q and tumor necrosis factor     | <a href="#">C1qtnf4</a>            | 0.986 | -0.116 | 0.910957 | 0.964559 |
| 9951 | 10488594 | <a href="#">NM_019705</a>          | <a href="#">24105</a>     | RanBP-type and C3HC4-type<br>zinc | <a href="#">Rbck1</a>              | 0.986 | -0.417 | 0.688524 | 0.863063 |
| 9952 | 10554233 | <a href="#">NM_026531</a>          | <a href="#">68048</a>     | interferon stimulated exonucle    | <a href="#">Isg2011</a>            | 0.986 | -0.391 | 0.707384 | 0.872175 |
| 9953 | 10389293 | <a href="#">NM_145433</a>          | <a href="#">217038</a>    | mitochondrial rRNA methyltrans    | <a href="#">Mrm1</a>               | 0.986 | -0.278 | 0.788905 | 0.914104 |
| 9954 | 10487886 | <a href="#">NM_013460</a>          | <a href="#">11550</a>     | adrenergic receptor, alpha 1d     | <a href="#">Adra1d</a>             | 0.986 | -0.679 | 0.518599 | 0.757094 |
| 9955 | 10455094 | <a href="#">NM_053138</a>          | <a href="#">93884</a>     | protocadherin beta 13             | <a href="#">Pcdhb13</a>            | 0.986 | 0.073  | 0.943875 | 0.977948 |
| 9956 | 10534984 |                                    |                           |                                   |                                    | 0.986 | -0.413 | 0.691271 | 0.864541 |
| 9957 | 10550131 | <a href="#">NM_001004762</a>       | <a href="#">232889</a>    | phospholipase A2, group IVC (c    | <a href="#">Pla2g4c</a>            | 0.986 | 0.242  | 0.815585 | 0.926149 |
| 9958 | 10563253 | <a href="#">NM_011698</a>          | <a href="#">22342</a>     | lin-7 homolog B (C. elegans)      | <a href="#">Lin7b</a>              | 0.986 | -0.639 | 0.542461 | 0.774881 |
| 9959 | 10421670 |                                    |                           |                                   |                                    | 0.986 | 0.178  | 0.863697 | 0.945728 |
| 9960 | 10513920 | <a href="#">XR_032741</a>          | <a href="#">623115</a>    | similar to heterogeneous nucle    | <a href="#">LOC623115</a>          | 0.986 | -0.024 | 0.981295 | 0.992092 |
| 9961 | 10457961 | <a href="#">ENSMUST00000054984</a> | <a href="#">67158</a>     | SFT2 domain containing 3          | <a href="#">Sft2d3</a>             | 0.986 | -0.045 | 0.965274 | 0.986124 |
| 9962 | 10346340 | <a href="#">BC071241</a>           | <a href="#">68115</a>     | RIKEN cDNA 9430016H08<br>gene     | <a href="#">9430016H08Rik</a>      | 0.986 | -0.616 | 0.556957 | 0.785453 |
| 9963 | 10557488 | <a href="#">NM_011538</a>          | <a href="#">21389</a>     | T-box 6                           | <a href="#">Tbx6</a>               | 0.986 | -0.376 | 0.717697 | 0.876761 |
| 9964 | 10444895 | <a href="#">NM_008027</a>          | <a href="#">14251</a>     | flotillin 1                       | <a href="#">Flot1</a>              | 0.986 | -0.217 | 0.834057 | 0.933071 |
| 9965 | 10490491 | <a href="#">NM_008093</a>          | <a href="#">14464</a>     | GATA binding protein 5            | <a href="#">Gata5</a>              | 0.986 | -0.271 | 0.794035 | 0.91622  |
| 9966 | 10437942 | <a href="#">NM_023585</a>          | <a href="#">70620</a>     | ubiquitin-conjugating enzyme E    | <a href="#">Ube2v2</a>             | 0.986 | -0.362 | 0.727389 | 0.881863 |
| 9967 | 10595673 | <a href="#">NM_001039147</a>       | <a href="#">21761</a>     | mortality factor 4 like 1         | <a href="#">Morf4l1</a>            | 0.986 | -0.277 | 0.789727 | 0.914492 |
| 9968 | 10569545 | <a href="#">NM_030221</a>          | <a href="#">78914</a>     | NAD synthetase 1                  | <a href="#">Nadsyn1</a>            | 0.986 | -0.357 | 0.731166 | 0.883971 |
| 9969 | 10457745 | <a href="#">NM_029491</a>          | <a href="#">75964</a>     | RIKEN cDNA D030074E01<br>gene     | <a href="#">D030074E01Rik</a>      | 0.986 | -0.634 | 0.54577  | 0.777543 |
| 9970 | 10511298 | <a href="#">BC004010</a>           | <a href="#">230996</a>    | RIKEN cDNA 9430015G10<br>gene     | <a href="#">9430015G10Rik</a>      | 0.986 | -0.03  | 0.976832 | 0.990463 |
| 9971 | 10385353 | <a href="#">NM_007416</a>          | <a href="#">11548</a>     | adrenergic receptor, alpha 1b     | <a href="#">Adra1b</a>             | 0.986 | 0.05   | 0.961097 | 0.985069 |
| 9972 | 10363894 | <a href="#">NM_027184</a>          | <a href="#">69718</a>     | inositol polyphosphate multiki    | <a href="#">Ipmk</a>               | 0.986 | -0.372 | 0.72059  | 0.878367 |
| 9973 | 10384824 | <a href="#">BC033930</a>           | <a href="#">67939</a>     | RIKEN cDNA 2010316F05 gene        | <a href="#">2010316F05Rik</a>      | 0.986 | -1.013 | 0.343925 | 0.618153 |
| 9974 | 10414993 | <a href="#">BC038285</a>           | <a href="#">219065</a>    | RIKEN cDNA A630038E17<br>gene     | <a href="#">A630038E17Rik</a>      | 0.986 | 0.049  | 0.962417 | 0.985405 |
| 9975 | 10461999 | <a href="#">NM_146096</a>          | <a href="#">226016</a>    | RIKEN cDNA 5730446C15<br>gene     | <a href="#">5730446C15Rik</a>      | 0.986 | -0.366 | 0.724866 | 0.880713 |
| 9976 | 10585697 | <a href="#">ENSMUST00000085711</a> | <a href="#">330948</a>    | predicted gene, EG330948          | <a href="#">EG330948</a>           | 0.986 | -0.339 | 0.744434 | 0.891431 |

|       |          |                                    |                           |                                |                                    |       |        |          |          |
|-------|----------|------------------------------------|---------------------------|--------------------------------|------------------------------------|-------|--------|----------|----------|
| 9977  | 10567510 | <a href="#">XM_355934</a>          | <a href="#">381917</a>    | dynein, axonemal, heavy chain  | <a href="#">Dnahc3</a>             | 0.986 | 0.121  | 0.907213 | 0.963723 |
| 9978  | 10452147 | <a href="#">NM_008738</a>          | <a href="#">18188</a>     | neurturin                      | <a href="#">Nrtn</a>               | 0.986 | -0.054 | 0.958619 | 0.984334 |
| 9979  | 10463599 | <a href="#">NM_019408</a>          | <a href="#">18034</a>     | nuclear factor of kappa light  | <a href="#">Nfkb2</a>              | 0.986 | -0.089 | 0.931372 | 0.972759 |
| 9980  | 10451291 | <a href="#">NM_144856</a>          | <a href="#">108114</a>    | solute carrier family 22 (orga | <a href="#">Slc22a7</a>            | 0.986 | -0.256 | 0.805005 | 0.921108 |
| 9981  | 10464924 | <a href="#">NM_029576</a>          | <a href="#">76308</a>     | RAB1B, member RAS oncogene fam | <a href="#">Rab1b</a>              | 0.986 | -0.523 | 0.616944 | 0.823029 |
| 9982  | 10495574 | <a href="#">NM_028349</a>          | <a href="#">72776</a>     | spindle assembly 6 homolog (C. | <a href="#">Sass6</a>              | 0.986 | -0.403 | 0.698387 | 0.867855 |
| 9983  | 10581355 | <a href="#">NM_023182</a>          | <a href="#">109660</a>    | chymotrypsin-like              | <a href="#">Ctrl</a>               | 0.986 | -0.238 | 0.818467 | 0.927818 |
| 9984  | 10558263 | <a href="#">ENSMUST00000098000</a> | <a href="#">100038673</a> | predicted gene, ENSMUSG0000007 | <a href="#">ENSMUSG00000073814</a> | 0.986 | 0.215  | 0.835438 | 0.933323 |
| 9985  | 10370681 | <a href="#">NM_177994</a>          | <a href="#">109284</a>    | RIKEN cDNA C030046I01 gene     | <a href="#">C030046I01Rik</a>      | 0.986 | -0.581 | 0.578725 | 0.798523 |
| 9986  | 10572516 | <a href="#">NM_173013</a>          | <a href="#">270058</a>    | microtubule-associated protein | <a href="#">Mtap1s</a>             | 0.986 | -0.14  | 0.892377 | 0.957747 |
| 9987  | 10353915 | <a href="#">NM_027957</a>          | <a href="#">381337</a>    | cDNA sequence BC050210         | <a href="#">BC050210</a>           | 0.986 | -0.154 | 0.881731 | 0.953233 |
| 9988  | 10460771 | <a href="#">ENSMUST00000025699</a> | <a href="#">76663</a>     | RIKEN cDNA 1700123I01 gene     | <a href="#">1700123I01Rik</a>      | 0.986 | -0.107 | 0.917363 | 0.967481 |
| 9989  | 10514658 | <a href="#">ENSMUST00000097960</a> | <a href="#">67733</a>     | integrin beta 3 binding protei | <a href="#">Itgb3bp</a>            | 0.986 | -0.516 | 0.621317 | 0.826234 |
| 9990  | 10483706 | <a href="#">NM_007389</a>          | <a href="#">11435</a>     | cholinergic receptor, nicotini | <a href="#">Chrna1</a>             | 0.986 | -0.083 | 0.935936 | 0.974753 |
| 9991  | 10590563 | <a href="#">NM_153168</a>          | <a href="#">102436</a>    | leucyl-tRNA synthetase, mitoch | <a href="#">Lars2</a>              | 0.986 | -0.25  | 0.809766 | 0.923201 |
| 9992  | 10431792 | <a href="#">NM_172437</a>          | <a href="#">78895</a>     | pseudouridylyl synthase 7 hom  | <a href="#">Pus7l</a>              | 0.986 | -0.399 | 0.701534 | 0.869143 |
| 9993  | 10350777 | <a href="#">NM_028250</a>          | <a href="#">72482</a>     | acyl-Coenzyme A binding domain | <a href="#">Acbd6</a>              | 0.986 | -0.659 | 0.530608 | 0.765382 |
| 9994  | 10390691 | <a href="#">NM_145434</a>          | <a href="#">217166</a>    | nuclear receptor subfamily 1,  | <a href="#">Nr1d1</a>              | 0.986 | -0.17  | 0.869847 | 0.947897 |
| 9995  | 10478383 | <a href="#">NM_001099331</a>       | <a href="#">100043899</a> | novel SCP-like extracellular p | <a href="#">RP23-36P22.5</a>       | 0.986 | 0.266  | 0.797995 | 0.918148 |
| 9996  | 10491977 | <a href="#">NM_173382</a>          | <a href="#">212127</a>    | RIKEN cDNA 2810046L04 gene     | <a href="#">2810046L04Rik</a>      | 0.986 | -0.876 | 0.409182 | 0.673445 |
| 9997  | 10478774 | <a href="#">NM_001085495</a>       | <a href="#">99371</a>     | ADP-ribosylation factor guanin | <a href="#">Arfgaf2</a>            | 0.986 | -0.439 | 0.67328  | 0.854824 |
| 9998  | 10456745 | <a href="#">NM_001042660</a>       | <a href="#">17131</a>     | MAD homolog 7 (Drosophila)     | <a href="#">Smad7</a>              | 0.986 | -0.284 | 0.784236 | 0.912068 |
| 9999  | 10548295 | <a href="#">ENSMUST00000032517</a> | <a href="#">667622</a>    | predicted gene, EG667622       | <a href="#">EG667622</a>           | 0.986 | 0.234  | 0.821276 | 0.92863  |
| 10000 | 10535972 | <a href="#">ENSMUST00000067770</a> | <a href="#">77867</a>     | RIKEN cDNA D730045B01 gene     | <a href="#">D730045B01Rik</a>      | 0.986 | -0.678 | 0.518803 | 0.757221 |
| 10001 | 10500580 |                                    |                           |                                |                                    | 0.986 | -0.277 | 0.789757 | 0.914492 |
| 10002 | 10385004 | <a href="#">NM_181569</a>          | <a href="#">17168</a>     | alpha globin regulatory elemen | <a href="#">Mare</a>               | 0.986 | -0.284 | 0.784102 | 0.912068 |
| 10003 | 10345438 |                                    |                           |                                |                                    | 0.986 | -0.409 | 0.69425  | 0.865724 |
| 10004 | 10381109 | <a href="#">NM_001126323</a>       | <a href="#">670550</a>    | novel member of the keratin as | <a href="#">RP23-212C14.10</a>     | 0.986 | -0.306 | 0.768205 | 0.90369  |
| 10005 | 10597854 | <a href="#">NM_001033784</a>       | <a href="#">434446</a>    | coiled-coil domain containing  | <a href="#">Ccdc13</a>             | 0.986 | -0.168 | 0.871419 | 0.948625 |
| 10006 | 10530128 | <a href="#">BC079612</a>           | <a href="#">791323</a>    | predicted gene, ENSMUSG0000005 | <a href="#">ENSMUSG00000054714</a> | 0.986 | -0.062 | 0.952448 | 0.981554 |
| 10007 | 10470014 | <a href="#">NM_009849</a>          | <a href="#">12496</a>     | ectonucleoside triphosphate di | <a href="#">Entpd2</a>             | 0.986 | 0.028  | 0.978613 | 0.991413 |
| 10008 | 10564434 |                                    |                           |                                |                                    | 0.986 | -0.186 | 0.857808 | 0.942795 |
| 10009 | 10543921 | <a href="#">NM_172892</a>          | <a href="#">243755</a>    | solute carrier family 13 (sodi | <a href="#">Slc13a4</a>            | 0.985 | 0.012  | 0.990524 | 0.995941 |
| 10010 | 10498566 |                                    |                           |                                |                                    | 0.985 | -0.147 | 0.886991 | 0.955613 |
| 10011 | 10545651 | <a href="#">NM_023547</a>          | <a href="#">70020</a>     | zinc finger, HIT type 4        | <a href="#">Znhit4</a>             | 0.985 | -0.336 | 0.746598 | 0.892388 |
| 10012 | 10385893 | <a href="#">NM_019687</a>          | <a href="#">30805</a>     | solute carrier family 22 (orga | <a href="#">Slc22a4</a>            | 0.985 | -0.032 | 0.975366 | 0.989745 |
| 10013 | 10590690 | <a href="#">NM_029851</a>          | <a href="#">110350</a>    | dynein cytoplasmic 2 heavy cha | <a href="#">Dync2h1</a>            | 0.985 | -0.268 | 0.796535 | 0.917464 |
| 10014 | 10438313 | <a href="#">NM_033324</a>          | <a href="#">94223</a>     | DiGeorge syndrome critical reg | <a href="#">Dgcr8</a>              | 0.985 | -0.331 | 0.750377 | 0.894477 |
| 10015 | 10378401 |                                    |                           |                                |                                    | 0.985 | -0.07  | 0.94605  | 0.978614 |
| 10016 | 10351644 | <a href="#">NM_018729</a>          | <a href="#">18106</a>     | CD244 natural killer cell rece | <a href="#">Cd244</a>              | 0.985 | -0.08  | 0.938162 | 0.975903 |
| 10017 | 10378367 | <a href="#">NM_145099</a>          | <a href="#">246788</a>    | transient receptor potential c | <a href="#">Trpv3</a>              | 0.985 | -0.079 | 0.939076 | 0.976244 |
| 10018 | 10547206 | <a href="#">NM_033648</a>          | <a href="#">108017</a>    | FXFD domain-containing ion tra | <a href="#">Fxyd4</a>              | 0.985 | 0.028  | 0.978425 | 0.991366 |
| 10019 | 10370519 | <a href="#">NM_001011737</a>       | <a href="#">257883</a>    | olfactory receptor 1357        | <a href="#">Olfr1357</a>           | 0.985 | -0.044 | 0.966344 | 0.986657 |
| 10020 | 10536172 | <a href="#">XR_030507</a>          | <a href="#">667375</a>    | similar to COX11 homolog, cyto | <a href="#">LOC667375</a>          | 0.985 | 0.203  | 0.844494 | 0.936859 |
| 10021 | 10372410 | <a href="#">NM_028608</a>          | <a href="#">73690</a>     | GLI pathogenesis-related 1 (gl | <a href="#">Glipl1</a>             | 0.985 | -0.23  | 0.824437 | 0.929508 |
| 10022 | 10483536 | <a href="#">BC125570</a>           | <a href="#">75051</a>     | RIKEN cDNA 4930578N16 gene     | <a href="#">4930578N16Rik</a>      | 0.985 | -0.887 | 0.403553 | 0.668494 |
| 10023 | 10571474 | <a href="#">NM_023662</a>          | <a href="#">18536</a>     | pericentriolar material 1      | <a href="#">Pcm1</a>               | 0.985 | -0.534 | 0.609531 | 0.818311 |
| 10024 | 10549998 |                                    |                           |                                |                                    | 0.985 | -0.375 | 0.71874  | 0.877276 |
| 10025 | 10558496 | <a href="#">NM_027164</a>          | <a href="#">76612</a>     | leucine rich repeat containing | <a href="#">Lrrc27</a>             | 0.985 | -0.448 | 0.667105 | 0.851389 |
| 10026 | 10607943 |                                    |                           |                                |                                    | 0.985 | -0.133 | 0.897698 | 0.959787 |
| 10027 | 10394124 | <a href="#">NM_178664</a>          | <a href="#">210004</a>    | UDP-GlcNAc:betaGal beta-1,3-N- | <a href="#">B3gnt1l</a>            | 0.985 | -0.737 | 0.484227 | 0.732769 |
|       |          |                                    |                           | predicted gene                 |                                    |       |        |          |          |

|       |          |                                    |                           |                                   |                                    |       |        |          |          |
|-------|----------|------------------------------------|---------------------------|-----------------------------------|------------------------------------|-------|--------|----------|----------|
| 10028 | 10487575 | <a href="#">ENSMUST00000099385</a> | <a href="#">100043736</a> | predicted gene,<br>ENSMUSG0000007 | <a href="#">ENSMUSG00000074807</a> | 0.985 | -0.297 | 0.774834 | 0.907674 |
| 10029 | 10398831 | <a href="#">NM_198411</a>          | <a href="#">70435</a>     | RIKEN cDNA 2610204M08<br>gene     | <a href="#">2610204M08Rik</a>      | 0.985 | 0.088  | 0.932171 | 0.973077 |
| 10030 | 10409278 | <a href="#">NM_017373</a>          | <a href="#">18030</a>     | nuclear factor, interleukin 3,    | <a href="#">Nfil3</a>              | 0.985 | -1.035 | 0.334096 | 0.609656 |
| 10031 | 10359723 | <a href="#">NM_145513</a>          | <a href="#">226591</a>    | TIP41, TOR signalling pathway     | <a href="#">Tipr1</a>              | 0.985 | -0.533 | 0.610226 | 0.818642 |
| 10032 | 10509238 | <a href="#">NM_008309</a>          | <a href="#">15552</a>     | 5-hydroxytryptamine (serotonin    | <a href="#">Htr1d</a>              | 0.985 | -0.408 | 0.694893 | 0.866071 |
| 10033 | 10543173 | <a href="#">BC076621</a>           | <a href="#">232585</a>    | gene model 467, (NCBI)            | <a href="#">Gm467</a>              | 0.985 | -0.223 | 0.829762 | 0.931483 |
| 10034 | 10418835 | <a href="#">NM_021712</a>          | <a href="#">20508</a>     | solute carrier family 18 (vesi    | <a href="#">Slc18a3</a>            | 0.985 | 0.209  | 0.839863 | 0.935328 |
| 10035 | 10441398 | <a href="#">ENSMUST00000097433</a> | <a href="#">100038678</a> | predicted gene,<br>ENSMUSG0000007 | <a href="#">ENSMUSG00000073473</a> | 0.985 | 0.425  | 0.68315  | 0.859827 |
| 10036 | 10500990 | <a href="#">NM_009725</a>          | <a href="#">11950</a>     | ATP synthase, H+ transporting,    | <a href="#">Atp5f1</a>             | 0.985 | -1.078 | 0.315605 | 0.592484 |
| 10037 | 10583519 | <a href="#">NM_010493</a>          | <a href="#">15894</a>     | intercellular adhesion molecu     | <a href="#">Icam1</a>              | 0.985 | 0.012  | 0.991136 | 0.996414 |
| 10038 | 10517540 | <a href="#">NM_198248</a>          | <a href="#">230848</a>    | zinc finger and BTB domain con    | <a href="#">Zbtb40</a>             | 0.985 | -0.176 | 0.864981 | 0.946153 |
| 10039 | 10538214 | <a href="#">BC055818</a>           | <a href="#">231946</a>    | RIKEN cDNA D330028D13<br>gene     | <a href="#">D330028D13Rik</a>      | 0.985 | -0.052 | 0.960123 | 0.985    |
| 10040 | 10464153 | <a href="#">NM_025811</a>          | <a href="#">66866</a>     | NHL repeat containing 2           | <a href="#">Nhlrc2</a>             | 0.985 | -0.224 | 0.828755 | 0.931153 |
| 10041 | 10504743 | <a href="#">NM_053179</a>          | <a href="#">94181</a>     | N-acetylneuraminic acid syntha    | <a href="#">Nans</a>               | 0.985 | -0.73  | 0.488165 | 0.735812 |
| 10042 | 10466130 | <a href="#">NM_022430</a>          | <a href="#">64381</a>     | membrane-spanning 4-domains,<br>s | <a href="#">Ms4a8a</a>             | 0.985 | 0.475  | 0.648623 | 0.841922 |
| 10043 | 10461028 | <a href="#">NM_153597</a>          | <a href="#">107328</a>    | tRNA phosphotransferase 1         | <a href="#">Trpt1</a>              | 0.985 | -0.063 | 0.951621 | 0.98118  |
| 10044 | 10408006 | <a href="#">XM_905894</a>          | <a href="#">625752</a>    | ribosomal protein L29 pseudoge    | <a href="#">RP23-54E4.8</a>        | 0.985 | -0.227 | 0.826409 | 0.930238 |
| 10045 | 10544629 | <a href="#">NM_198102</a>          | <a href="#">101214</a>    | transformer 2 alpha homolog (D    | <a href="#">Tra2a</a>              | 0.985 | -0.001 | 0.99924  | 0.999589 |
| 10046 | 10581181 | <a href="#">NM_001033161</a>       | <a href="#">71609</a>     | TNFRSF1A-associated via death     | <a href="#">Tradd</a>              | 0.985 | -0.672 | 0.522492 | 0.759283 |
| 10047 | 10364502 | <a href="#">NM_023128</a>          | <a href="#">18483</a>     | paralemmin                        | <a href="#">Palm</a>               | 0.985 | -0.205 | 0.843091 | 0.93639  |
| 10048 | 10444524 | <a href="#">NM_145830</a>          | <a href="#">110147</a>    | euchromatic histone lysine N-m    | <a href="#">Ehmt2</a>              | 0.985 | -0.499 | 0.632547 | 0.832839 |
| 10049 | 10393761 | <a href="#">NM_027980</a>          | <a href="#">71885</a>     | RIKEN cDNA 2310003H01<br>gene     | <a href="#">2310003H01Rik</a>      | 0.985 | -0.246 | 0.812597 | 0.924634 |
| 10050 | 10406254 | <a href="#">NM_138953</a>          | <a href="#">192657</a>    | elongation factor RNA polymera    | <a href="#">Eif2</a>               | 0.985 | 0.054  | 0.958542 | 0.984334 |
| 10051 | 10440292 | <a href="#">XM_001480385</a>       | <a href="#">433036</a>    | similar to zinc finger protein    | <a href="#">LOC433036</a>          | 0.985 | -0.49  | 0.638767 | 0.835923 |
| 10052 | 10387397 | <a href="#">NM_001081330</a>       | <a href="#">327954</a>    | dynein, axonemal, heavy chain     | <a href="#">Dnahc2</a>             | 0.985 | 0.097  | 0.925372 | 0.970455 |
| 10053 | 10355329 | <a href="#">NM_007525</a>          | <a href="#">12021</a>     | BRCA1 associated RING<br>domain 1 | <a href="#">Bard1</a>              | 0.985 | -0.293 | 0.777747 | 0.909562 |
| 10054 | 10511665 | <a href="#">NM_178617</a>          | <a href="#">69352</a>     | N-terminal EF-hand calcium bin    | <a href="#">Necab1</a>             | 0.985 | -0.733 | 0.486472 | 0.734369 |
| 10055 | 10557357 | <a href="#">NM_001081022</a>       | <a href="#">233865</a>    | RIKEN cDNA D430042O09<br>gene     | <a href="#">D430042O09Rik</a>      | 0.985 | -0.255 | 0.806009 | 0.921787 |
| 10056 | 10547204 | <a href="#">ENSMUST00000035534</a> | <a href="#">74471</a>     | RIKEN cDNA 4933440N22<br>gene     | <a href="#">4933440N22Rik</a>      | 0.985 | -0.084 | 0.935148 | 0.974268 |
| 10057 | 10375472 | <a href="#">NM_178759</a>          | <a href="#">276891</a>    | T-cell immunoglobulin and muc     | <a href="#">Timd4</a>              | 0.985 | 0.578  | 0.580565 | 0.799564 |
| 10058 | 10422234 |                                    |                           |                                   |                                    | 0.985 | -0.332 | 0.749333 | 0.893972 |
| 10059 | 10448062 | <a href="#">XR_032603</a>          | <a href="#">636398</a>    | similar to zinc finger protein    | <a href="#">LOC636398</a>          | 0.985 | -0.455 | 0.662446 | 0.849733 |
| 10060 | 10528648 | <a href="#">NM_013853</a>          | <a href="#">27407</a>     | ATP-binding cassette, sub-fami    | <a href="#">Abcf2</a>              | 0.985 | -0.487 | 0.64057  | 0.837232 |
| 10061 | 10438293 | <a href="#">NM_172151</a>          | <a href="#">27801</a>     | zinc finger, DHHC domain conta    | <a href="#">Zdhhc8</a>             | 0.985 | -0.892 | 0.401115 | 0.666661 |
| 10062 | 10568139 | <a href="#">NM_010772</a>          | <a href="#">17188</a>     | MYC-associated zinc finger pro    | <a href="#">Maz</a>                | 0.985 | -0.174 | 0.866987 | 0.946934 |
| 10063 | 10381683 | <a href="#">NM_025988</a>          | <a href="#">67131</a>     | acyl-Coenzyme A binding<br>domain | <a href="#">Acbd4</a>              | 0.985 | -0.346 | 0.739302 | 0.888979 |
| 10064 | 10548815 | <a href="#">ENSMUST00000058713</a> | <a href="#">243676</a>    | RIKEN cDNA E330021D16<br>gene     | <a href="#">E330021D16Rik</a>      | 0.985 | -0.014 | 0.989329 | 0.995355 |
| 10065 | 10588479 | <a href="#">NM_031178</a>          | <a href="#">81897</a>     | toll-like receptor 9              | <a href="#">Tlr9</a>               | 0.985 | 0.681  | 0.516863 | 0.756112 |
| 10066 | 10573008 | <a href="#">NM_178267</a>          | <a href="#">622675</a>    | zinc finger protein 827           | <a href="#">Zfp827</a>             | 0.985 | -0.441 | 0.671989 | 0.854437 |
| 10067 | 10449152 | <a href="#">NM_139154</a>          | <a href="#">224624</a>    | Rab40c, member RAS oncogene<br>fa | <a href="#">Rab40c</a>             | 0.985 | -0.385 | 0.711687 | 0.87371  |
| 10068 | 10507731 | <a href="#">NM_182929</a>          | <a href="#">242662</a>    | regulating synaptic membrane e    | <a href="#">Rims3</a>              | 0.985 | -0.3   | 0.772899 | 0.906589 |
| 10069 | 10357590 | <a href="#">NM_145508</a>          | <a href="#">226419</a>    | dual-specificity tyrosine-(Y)-    | <a href="#">Dyrk3</a>              | 0.985 | -1.297 | 0.234436 | 0.50565  |
| 10070 | 10418578 | <a href="#">NM_022656</a>          | <a href="#">64652</a>     | nischarin                         | <a href="#">Nisch</a>              | 0.985 | -0.839 | 0.428562 | 0.689543 |
| 10071 | 10471256 | <a href="#">NM_172268</a>          | <a href="#">227720</a>    | nucleoporin 214                   | <a href="#">Nup214</a>             | 0.985 | -0.62  | 0.554367 | 0.783473 |
| 10072 | 10448593 | <a href="#">NM_153792</a>          | <a href="#">224619</a>    | Tnf receptor-associated factor    | <a href="#">Traf7</a>              | 0.985 | -0.63  | 0.547995 | 0.778543 |
| 10073 | 10452468 | <a href="#">BC096657</a>           | <a href="#">64657</a>     | mitochondrial ribosomal protei    | <a href="#">Mrps10</a>             | 0.985 | -0.758 | 0.472767 | 0.724458 |
| 10074 | 10557508 | <a href="#">NM_010069</a>          | <a href="#">13446</a>     | double C2, alpha                  | <a href="#">Doc2a</a>              | 0.985 | -0.501 | 0.631488 | 0.832534 |
| 10075 | 10393761 | <a href="#">NM_027980</a>          | <a href="#">71885</a>     | RIKEN cDNA 2310003H01             | <a href="#">2310003H01Rik</a>      | 0.985 | -0.246 | 0.812597 | 0.924634 |

|       |          |                                    |                           |                                |                                    |       |        |          |          |
|-------|----------|------------------------------------|---------------------------|--------------------------------|------------------------------------|-------|--------|----------|----------|
| 10075 | 10383434 | <a href="#">ENSMUS10000066154</a>  | <a href="#">100015211</a> | gene                           | <a href="#">4732444A12Rik</a>      | 0.985 | -0.532 | 0.610906 | 0.819294 |
| 10076 | 10397866 | <a href="#">NM_013747</a>          | <a href="#">27277</a>     | golgi autoantigen, golgin subf | <a href="#">Golga5</a>             | 0.985 | -0.453 | 0.66409  | 0.850267 |
| 10077 | 10398446 | <a href="#">NM_172119</a>          | <a href="#">107585</a>    | deiodinase, iodothyronine type | <a href="#">Dio3</a>               | 0.985 | 0.003  | 0.997727 | 0.999192 |
| 10078 | 10355202 | <a href="#">NM_007774</a>          | <a href="#">12964</a>     | crystallin, gamma A            | <a href="#">Cryga</a>              | 0.985 | -0.493 | 0.636966 | 0.835122 |
| 10079 | 10596261 |                                    |                           |                                |                                    | 0.985 | -0.935 | 0.380132 | 0.649758 |
| 10080 | 10582221 | <a href="#">NM_029597</a>          | <a href="#">76405</a>     | RIKEN cDNA 1700018B08 gene     | <a href="#">1700018B08Rik</a>      | 0.985 | -0.198 | 0.848307 | 0.938486 |
| 10081 | 10596664 | <a href="#">NM_019720</a>          | <a href="#">56368</a>     | cytochrome b-561 domain contai | <a href="#">Cyb561d2</a>           | 0.985 | -0.55  | 0.598612 | 0.811605 |
| 10082 | 10397530 | <a href="#">NM_026958</a>          | <a href="#">380773</a>    | RIKEN cDNA 1810035L17 gene     | <a href="#">1810035L17Rik</a>      | 0.985 | -0.783 | 0.458669 | 0.713672 |
| 10083 | 10575844 | <a href="#">NM_019707</a>          | <a href="#">12554</a>     | cadherin 13                    | <a href="#">Cdh13</a>              | 0.985 | -0.536 | 0.607924 | 0.817473 |
| 10084 | 10520796 | <a href="#">NM_026296</a>          | <a href="#">67656</a>     | RIKEN cDNA 4930548H24 gene     | <a href="#">4930548H24Rik</a>      | 0.985 | -0.017 | 0.987128 | 0.994703 |
| 10085 | 10446427 | <a href="#">NM_001037757</a>       | <a href="#">68767</a>     | open reading frame 19          | <a href="#">ORF19</a>              | 0.985 | -0.413 | 0.691357 | 0.864541 |
| 10086 | 10433373 | <a href="#">ENSMUST00000116667</a> | <a href="#">239690</a>    | similar to SEC14-like 1        | <a href="#">LOC239690</a>          | 0.984 | -0.09  | 0.930877 | 0.972759 |
| 10087 | 10375103 | <a href="#">NM_134015</a>          | <a href="#">103583</a>    | F-box and WD-40 domain protein | <a href="#">Fbxw11</a>             | 0.984 | -0.737 | 0.484197 | 0.732769 |
| 10088 | 10350792 | <a href="#">NM_022329</a>          | <a href="#">64164</a>     | interferon alpha responsive ge | <a href="#">Ifrg15</a>             | 0.984 | -0.682 | 0.516264 | 0.755582 |
| 10089 | 10476886 | <a href="#">NM_009219</a>          | <a href="#">20608</a>     | somatostatin receptor 4        | <a href="#">Sstr4</a>              | 0.984 | 0.241  | 0.8159   | 0.926256 |
| 10090 | 10545298 | <a href="#">NM_024288</a>          | <a href="#">68477</a>     | required for meiotic nuclear d | <a href="#">Rmnd5a</a>             | 0.984 | -0.503 | 0.630125 | 0.831393 |
| 10091 | 10555205 | <a href="#">NM_201352</a>          | <a href="#">233552</a>    | glycerophosphodiester phosphod | <a href="#">Gdpd5</a>              | 0.984 | -0.103 | 0.920627 | 0.968204 |
| 10092 | 10560168 | <a href="#">NM_007770</a>          | <a href="#">12951</a>     | cone-rod homeobox containing g | <a href="#">Crx</a>                | 0.984 | -0.124 | 0.904542 | 0.962829 |
| 10093 | 10556546 | <a href="#">NM_054084</a>          | <a href="#">116903</a>    | calcitonin-related polypeptide | <a href="#">Calcb</a>              | 0.984 | -0.215 | 0.835552 | 0.933375 |
| 10094 | 10347564 | <a href="#">NM_178055</a>          | <a href="#">56812</a>     | DnaJ (Hsp40) homolog, subfamil | <a href="#">Dnajb10</a>            | 0.984 | -0.42  | 0.68687  | 0.861858 |
| 10095 | 10555007 |                                    |                           |                                |                                    | 0.984 | -0.338 | 0.745283 | 0.891658 |
| 10096 | 10345921 | <a href="#">NM_024283</a>          | <a href="#">78896</a>     | RIKEN cDNA 1500015O10 gene     | <a href="#">1500015O10Rik</a>      | 0.984 | 0.001  | 0.999181 | 0.999589 |
| 10097 | 10447023 |                                    |                           |                                |                                    | 0.984 | -0.448 | 0.667057 | 0.851389 |
| 10098 | 10370983 | <a href="#">NM_023900</a>          | <a href="#">78670</a>     | pleckstrin homology domain con | <a href="#">Plekhj1</a>            | 0.984 | -0.229 | 0.824908 | 0.929565 |
| 10099 | 10540790 | <a href="#">NM_009507</a>          | <a href="#">22346</a>     | von Hippel-Lindau syndrome hom | <a href="#">Vhlh</a>               | 0.984 | -0.551 | 0.598245 | 0.811268 |
| 10100 | 10556998 | <a href="#">ENSMUST00000116276</a> | <a href="#">436008</a>    | predicted gene, EG436008       | <a href="#">EG436008</a>           | 0.984 | -0.017 | 0.987265 | 0.994746 |
| 10101 | 10570975 | <a href="#">NM_027194</a>          | <a href="#">69742</a>     | TM2 domain containing 2        | <a href="#">Tm2d2</a>              | 0.984 | -0.95  | 0.37303  | 0.643392 |
| 10102 | 10476482 | <a href="#">NM_029530</a>          | <a href="#">76161</a>     | RIKEN cDNA 6330527O06 gene     | <a href="#">6330527O06Rik</a>      | 0.984 | -0.035 | 0.973252 | 0.988537 |
| 10103 | 10550967 | <a href="#">NM_001102613</a>       | <a href="#">232970</a>    | pleckstrin homology-like domai | <a href="#">Phldb3</a>             | 0.984 | 0.018  | 0.986125 | 0.994146 |
| 10104 | 10508974 | <a href="#">NM_133880</a>          | <a href="#">100163</a>    | platelet-activating factor ace | <a href="#">Pafah2</a>             | 0.984 | -0.159 | 0.878156 | 0.951744 |
| 10105 | 10490734 |                                    |                           |                                |                                    | 0.984 | 0.331  | 0.750276 | 0.894442 |
| 10106 | 10604375 | <a href="#">NM_013912</a>          | <a href="#">30878</a>     | apelin                         | <a href="#">Apln</a>               | 0.984 | -0.326 | 0.753359 | 0.8961   |
| 10107 | 10567423 | <a href="#">NM_173408</a>          | <a href="#">233805</a>    | DCN1, defective in cullin nedd | <a href="#">Dcun1d3</a>            | 0.984 | -0.045 | 0.965266 | 0.986124 |
| 10108 | 10535532 | <a href="#">BC046968</a>           | <a href="#">70381</a>     | RIKEN cDNA 2210010N04 gene     | <a href="#">2210010N04Rik</a>      | 0.984 | -0.292 | 0.77868  | 0.909988 |
| 10109 | 10477069 | <a href="#">NM_009328</a>          | <a href="#">21407</a>     | transcription factor 15        | <a href="#">Tcf15</a>              | 0.984 | -0.064 | 0.950679 | 0.981023 |
| 10110 | 10495199 | <a href="#">NM_001081140</a>       | <a href="#">242151</a>    | potassium voltage-gated channe | <a href="#">Kcna10</a>             | 0.984 | -0.064 | 0.950907 | 0.981077 |
| 10111 | 10565888 | <a href="#">ENSMUST00000098254</a> | <a href="#">100038497</a> | predicted gene, ENSMUSG0000007 | <a href="#">ENSMUSG00000073994</a> | 0.984 | -0.007 | 0.994429 | 0.997732 |
| 10112 | 10532330 |                                    |                           |                                |                                    | 0.984 | -0.196 | 0.849803 | 0.939466 |
| 10113 | 10562741 | <a href="#">XM_621786</a>          | <a href="#">546967</a>    | acid phosphatase, testicular   | <a href="#">Acpt</a>               | 0.984 | -0.111 | 0.91454  | 0.96632  |
| 10114 | 10557374 | <a href="#">NM_001081022</a>       | <a href="#">233865</a>    | RIKEN cDNA D430042O09 gene     | <a href="#">D430042O09Rik</a>      | 0.984 | -0.384 | 0.712075 | 0.873832 |
| 10115 | 10519495 | <a href="#">BC049718</a>           | <a href="#">70920</a>     | RIKEN cDNA 4921511H03 gene     | <a href="#">4921511H03Rik</a>      | 0.984 | 0.058  | 0.955238 | 0.982897 |
| 10116 | 10430725 | <a href="#">NM_133726</a>          | <a href="#">70356</a>     | suppression of tumorigenicity  | <a href="#">St13</a>               | 0.984 | -0.744 | 0.480362 | 0.729941 |
| 10117 | 10568629 | <a href="#">NM_152944</a>          | <a href="#">214766</a>    | matrix metalloproteinase 21    | <a href="#">Mmp21</a>              | 0.984 | -0.224 | 0.82902  | 0.931194 |
| 10118 | 10531776 | <a href="#">NM_172405</a>          | <a href="#">70681</a>     | coiled-coil domain containing  | <a href="#">Ccdc98</a>             | 0.984 | -0.324 | 0.755172 | 0.897043 |
| 10119 | 10532716 | <a href="#">ENSMUST00000047891</a> | <a href="#">73476</a>     | RIKEN cDNA 1700069L16 gene     | <a href="#">1700069L16Rik</a>      | 0.984 | -0.023 | 0.982011 | 0.992289 |
| 10120 | 10385248 | <a href="#">NM_013552</a>          | <a href="#">15366</a>     | hyaluronan mediated motility r | <a href="#">Hmnr</a>               | 0.984 | -0.878 | 0.408296 | 0.672667 |
| 10121 | 10542297 | <a href="#">NM_026371</a>          | <a href="#">67774</a>     | loss of heterozygosity, 12, ch | <a href="#">Loh12cr1</a>           | 0.984 | -0.283 | 0.785246 | 0.912507 |
| 10122 | 10432139 | <a href="#">NM_173769</a>          | <a href="#">239652</a>    | zinc finger protein 641        | <a href="#">Zfp641</a>             | 0.984 | 0.128  | 0.901574 | 0.961364 |
|       |          |                                    |                           | RIKEN cDNA 4921511H13          |                                    |       |        |          |          |

|       |          |                                    |                           |                                |                                    |       |        |          |          |
|-------|----------|------------------------------------|---------------------------|--------------------------------|------------------------------------|-------|--------|----------|----------|
| 10123 | 10440800 | <a href="#">ENSMUST00000037810</a> | <a href="#">207932</a>    | gene                           | <a href="#">4921511H13Rik</a>      | 0.984 | -0.261 | 0.801435 | 0.919489 |
| 10124 | 10375975 | <a href="#">NM_026479</a>          | <a href="#">67966</a>     | zinc finger, CCHC domain conta | <a href="#">Zcche10</a>            | 0.984 | -0.261 | 0.801732 | 0.919646 |
| 10125 | 10420216 | <a href="#">NM_001082975</a>       | <a href="#">654795</a>    | RIKEN cDNA 2310014G06 gene     | <a href="#">2310014G06Rik</a>      | 0.984 | -0.973 | 0.361954 | 0.633538 |
| 10126 | 10363641 | <a href="#">NM_026101</a>          | <a href="#">67345</a>     | hect domain and RLD 4          | <a href="#">Herc4</a>              | 0.984 | -0.257 | 0.804191 | 0.920618 |
| 10127 | 10348432 | <a href="#">NM_178119</a>          | <a href="#">347722</a>    | centaurin, gamma 2             | <a href="#">Centg2</a>             | 0.984 | -0.645 | 0.538961 | 0.772021 |
| 10128 | 10451395 | <a href="#">NM_029091</a>          | <a href="#">74764</a>     | kinesin light chain 4          | <a href="#">Klc4</a>               | 0.984 | -0.338 | 0.744995 | 0.891615 |
| 10129 | 10424929 | <a href="#">NM_172960</a>          | <a href="#">268822</a>    | aarF domain containing kinase  | <a href="#">Adck5</a>              | 0.984 | -0.556 | 0.595101 | 0.809184 |
| 10130 | 10478160 | <a href="#">BC068129</a>           | <a href="#">71878</a>     | RIKEN cDNA 2310007D09 gene     | <a href="#">2310007D09Rik</a>      | 0.984 | -0.366 | 0.7248   | 0.880713 |
| 10131 | 10431154 | <a href="#">NM_001081166</a>       | <a href="#">271305</a>    | PHD finger protein 21B         | <a href="#">Phf21b</a>             | 0.984 | -0.176 | 0.865435 | 0.94621  |
| 10132 | 10532660 | <a href="#">NM_021352</a>          | <a href="#">12962</a>     | crystallin, beta B3            | <a href="#">Crybb3</a>             | 0.984 | -0.254 | 0.806509 | 0.921832 |
| 10133 | 10486320 | <a href="#">XM_917516</a>          | <a href="#">70715</a>     | RIKEN cDNA 6330405D24 gene     | <a href="#">6330405D24Rik</a>      | 0.984 | -0.124 | 0.904427 | 0.962829 |
| 10134 | 10591960 | <a href="#">NM_178027</a>          | <a href="#">69091</a>     | vacuolar protein sorting 26 ho | <a href="#">Vps26b</a>             | 0.984 | -0.601 | 0.566459 | 0.79227  |
| 10135 | 10524004 | <a href="#">NM_172716</a>          | <a href="#">69587</a>     | polycomb group ring finger 3   | <a href="#">Pcgf3</a>              | 0.984 | -0.44  | 0.672942 | 0.854651 |
| 10136 | 10437594 | <a href="#">NM_001003918</a>       | <a href="#">252870</a>    | ubiquitin specific peptidase 7 | <a href="#">Usp7</a>               | 0.984 | -0.437 | 0.67459  | 0.855467 |
| 10137 | 10388669 | <a href="#">NM_001024920</a>       | <a href="#">216964</a>    | transformation related protein | <a href="#">Trp53i13</a>           | 0.984 | -0.136 | 0.895665 | 0.959029 |
| 10138 | 10560726 |                                    |                           |                                |                                    | 0.984 | 0.149  | 0.885634 | 0.95523  |
| 10139 | 10494817 | <a href="#">NM_013609</a>          | <a href="#">18049</a>     | nerve growth factor            | <a href="#">Ngf</a>                | 0.984 | -0.458 | 0.660358 | 0.848652 |
| 10140 | 10432831 | <a href="#">NM_212485</a>          | <a href="#">223915</a>    | keratin 73                     | <a href="#">Krt73</a>              | 0.984 | 0.25   | 0.809691 | 0.923191 |
| 10141 | 10458870 | <a href="#">XR_034277</a>          | <a href="#">628477</a>    | similar to ribosomal protein L | <a href="#">LOC628477</a>          | 0.984 | -0.645 | 0.538715 | 0.771721 |
| 10142 | 10565547 | <a href="#">NM_029078</a>          | <a href="#">74737</a>     | cleavage and polyadenylation f | <a href="#">Pcf11</a>              | 0.984 | -0.124 | 0.904517 | 0.962829 |
| 10143 | 10565514 | <a href="#">NM_025460</a>          | <a href="#">66271</a>     | transmembrane protein 126A     | <a href="#">Tmem126a</a>           | 0.984 | -1.162 | 0.28215  | 0.557189 |
| 10144 | 10376461 | <a href="#">NM_053168</a>          | <a href="#">94091</a>     | tripartite motif-containing 11 | <a href="#">Trim11</a>             | 0.984 | -0.133 | 0.897871 | 0.959787 |
| 10145 | 10366725 | <a href="#">NM_182807</a>          | <a href="#">268354</a>    | expressed sequence AI851790    | <a href="#">AI851790</a>           | 0.984 | -0.263 | 0.800088 | 0.919271 |
| 10146 | 10596273 | <a href="#">ENSMUST00000060084</a> | <a href="#">235567</a>    | DnaJ (Hsp40) homolog, subfamil | <a href="#">Dnajc13</a>            | 0.984 | -0.425 | 0.683222 | 0.859827 |
| 10147 | 10405741 | <a href="#">XR_030564</a>          | <a href="#">100044367</a> | similar to high mobility group | <a href="#">LOC100044367</a>       | 0.984 | -0.312 | 0.764032 | 0.90173  |
| 10148 | 10522802 | <a href="#">NM_177680</a>          | <a href="#">231386</a>    | YTH domain containing 1        | <a href="#">Ythdc1</a>             | 0.984 | -0.386 | 0.710877 | 0.873183 |
| 10149 | 10389672 | <a href="#">NM_146412</a>          | <a href="#">258407</a>    | olfactory receptor 464         | <a href="#">Olfr464</a>            | 0.984 | -0.043 | 0.966516 | 0.986746 |
| 10150 | 10445627 | <a href="#">NM_025966</a>          | <a href="#">67101</a>     | RIKEN cDNA 2310039H08 gene     | <a href="#">2310039H08Rik</a>      | 0.984 | -0.962 | 0.367007 | 0.638    |
| 10151 | 10443830 | <a href="#">NM_013501</a>          | <a href="#">12954</a>     | crystallin, alpha A            | <a href="#">Cryaa</a>              | 0.984 | -0.177 | 0.864234 | 0.945925 |
| 10152 | 10546339 | <a href="#">NM_009527</a>          | <a href="#">22421</a>     | wingless-related MMTV integrat | <a href="#">Wnt7a</a>              | 0.984 | -0.273 | 0.792741 | 0.91549  |
| 10153 | 10580058 | <a href="#">ENSMUST00000056686</a> | <a href="#">70134</a>     | RIKEN cDNA 2210011C24 gene     | <a href="#">2210011C24Rik</a>      | 0.984 | -0.265 | 0.798188 | 0.918238 |
| 10154 | 10386624 | <a href="#">NM_173453</a>          | <a href="#">216821</a>    | transmembrane protein 11       | <a href="#">Tmem11</a>             | 0.984 | -0.606 | 0.563096 | 0.789853 |
| 10155 | 10428441 | <a href="#">XM_001473255</a>       | <a href="#">432950</a>    | predicted gene, EG432950       | <a href="#">EG432950</a>           | 0.984 | -0.741 | 0.48203  | 0.730954 |
| 10156 | 10382257 | <a href="#">NM_025275</a>          | <a href="#">13929</a>     | archaelysin family metallopept | <a href="#">Amz2</a>               | 0.984 | -0.712 | 0.498866 | 0.742429 |
| 10157 | 10385203 | <a href="#">NM_011856</a>          | <a href="#">23964</a>     | odd Oz/ten-m homolog 2 (Drosop | <a href="#">Odz2</a>               | 0.984 | -0.085 | 0.934387 | 0.973859 |
| 10158 | 10519949 | <a href="#">BC020055</a>           | <a href="#">320770</a>    | RIKEN cDNA A630072M18 gene     | <a href="#">A630072M18Rik</a>      | 0.984 | -0.273 | 0.792666 | 0.91549  |
| 10159 | 10453260 | <a href="#">NM_025325</a>          | <a href="#">107766</a>    | 3-hydroxyanthranilate 3,4-diox | <a href="#">Haao</a>               | 0.984 | -0.254 | 0.806601 | 0.921832 |
| 10160 | 10555695 | <a href="#">NM_009103</a>          | <a href="#">20133</a>     | ribonucleotide reductase M1    | <a href="#">Rrm1</a>               | 0.984 | -0.941 | 0.376988 | 0.647069 |
| 10161 | 10390996 | <a href="#">NM_016880</a>          | <a href="#">53617</a>     | keratin 35                     | <a href="#">Krt35</a>              | 0.983 | -0.25  | 0.809488 | 0.923176 |
| 10162 | 10437817 | <a href="#">NM_053181</a>          | <a href="#">94184</a>     | pyridoxal-dependent decarboxyl | <a href="#">Pdxdc1</a>             | 0.983 | -0.763 | 0.469739 | 0.721815 |
| 10163 | 10601610 | <a href="#">XR_030551</a>          | <a href="#">100044428</a> | similar to transformed mouse 3 | <a href="#">LOC100044428</a>       | 0.983 | -0.353 | 0.734147 | 0.886455 |
| 10164 | 10520459 | <a href="#">BC113782</a>           | <a href="#">242915</a>    | gene model 444, (NCBI)         | <a href="#">Gm444</a>              | 0.983 | 0.276  | 0.790033 | 0.914502 |
| 10165 | 10518927 | <a href="#">NM_010598</a>          | <a href="#">16498</a>     | potassium voltage-gated channe | <a href="#">Kenab2</a>             | 0.983 | 0.026  | 0.980016 | 0.991919 |
| 10166 | 10491272 | <a href="#">BC116649</a>           | <a href="#">71862</a>     | G protein-coupled receptor 160 | <a href="#">Gpr160</a>             | 0.983 | 0.077  | 0.941045 | 0.97709  |
| 10167 | 10380710 |                                    |                           |                                |                                    | 0.983 | -0.343 | 0.741371 | 0.889595 |
| 10168 | 10449435 | <a href="#">NM_021478</a>          | <a href="#">22157</a>     | tubby like protein 1           | <a href="#">Tulp1</a>              | 0.983 | -0.261 | 0.80141  | 0.919489 |
| 10169 | 10417181 | <a href="#">ENSMUST00000100294</a> | <a href="#">100038380</a> | predicted gene, ENSMUSG0000007 | <a href="#">ENSMUSG00000075465</a> | 0.983 | -0.498 | 0.633188 | 0.833255 |
| 10170 | 10525591 | <a href="#">NM_001042421</a>       | <a href="#">208628</a>    | kinetochore associated 1       | <a href="#">Kntc1</a>              | 0.983 | -0.84  | 0.42807  | 0.689167 |
| 10171 | 10444521 | <a href="#">NM_198886</a>          | <a href="#">193736</a>    | zinc finger and BTB domain con | <a href="#">Zbtb12</a>             | 0.983 | -0.633 | 0.546029 | 0.777637 |
| 10172 | 10366335 | <a href="#">ENSMUST00000040454</a> | <a href="#">71769</a>     | Bardet-Biedl syndrome 10 (huma | <a href="#">Bbs10</a>              | 0.983 | -0.535 | 0.608804 | 0.817918 |
| 10173 | 10576772 | <a href="#">AK016282</a>           | <a href="#">75863</a>     | C-type lectin domain family 4  | <a href="#">Clec4e</a>             | 0.983 | -0.309 | 0.766042 | 0.902642 |

| 10174 | 10431326 | <a href="#">NM_133241</a>          | <a href="#">170790</a>    | megalencephalic leukoencephalo | <a href="#">Mlc1</a>               | 0.983 | 0.134  | 0.897139 | 0.95959  |
|-------|----------|------------------------------------|---------------------------|--------------------------------|------------------------------------|-------|--------|----------|----------|
| 10175 | 10450854 | <a href="#">NM_182714</a>          | <a href="#">258470</a>    | olfactory receptor 91          | <a href="#">Olfir91</a>            | 0.983 | 0.094  | 0.927693 | 0.971576 |
| 10176 | 10551734 |                                    |                           |                                |                                    | 0.983 | 0.168  | 0.87095  | 0.948568 |
| 10177 | 10576561 | <a href="#">BC025168</a>           | <a href="#">66566</a>     | RIKEN cDNA 2310079N02 gene     | <a href="#">2310079N02Rik</a>      | 0.983 | -0.472 | 0.651076 | 0.843733 |
| 10178 | 10422055 | <a href="#">ENSMUST00000066461</a> | <a href="#">791326</a>    | predicted gene, ENSMUSG0000005 | <a href="#">ENSMUSG00000053821</a> | 0.983 | -0.059 | 0.95474  | 0.982671 |
| 10179 | 10496405 | <a href="#">XM_001473061</a>       | <a href="#">100039528</a> | similar to hCG2038359          | <a href="#">LOC100039528</a>       | 0.983 | -0.16  | 0.87754  | 0.951715 |
| 10180 | 10376004 | <a href="#">NM_008110</a>          | <a href="#">14566</a>     | growth differentiation factor  | <a href="#">Gdf9</a>               | 0.983 | 0.054  | 0.95829  | 0.984334 |
| 10181 | 10479607 | <a href="#">NM_023684</a>          | <a href="#">72699</a>     | Lck interacting transmembrane  | <a href="#">Lime1</a>              | 0.983 | -0.757 | 0.473151 | 0.724844 |
| 10182 | 10525932 | <a href="#">ENSMUST00000051260</a> | <a href="#">208213</a>    | transmembrane protein 132C     | <a href="#">Tmem132c</a>           | 0.983 | 0.204  | 0.84367  | 0.936632 |
| 10183 | 10430280 |                                    |                           |                                |                                    | 0.983 | -0.251 | 0.80912  | 0.923112 |
| 10184 | 10566966 | <a href="#">NM_013507</a>          | <a href="#">13690</a>     | eukaryotic translation initiat | <a href="#">Eif4g2</a>             | 0.983 | -0.463 | 0.657292 | 0.846702 |
| 10185 | 10434396 | <a href="#">NM_013852</a>          | <a href="#">27406</a>     | ATP-binding cassette, sub-fami | <a href="#">Abcf3</a>              | 0.983 | -0.617 | 0.556189 | 0.784737 |
| 10186 | 10447704 | <a href="#">NR_003636</a>          | <a href="#">67543</a>     | poly(A) binding protein, cytop | <a href="#">Pabpc3</a>             | 0.983 | -0.243 | 0.814508 | 0.925464 |
| 10187 | 10428839 | <a href="#">ENSMUST00000075109</a> | <a href="#">546638</a>    | predicted gene, EG546638       | <a href="#">EG546638</a>           | 0.983 | -0.418 | 0.688129 | 0.862825 |
| 10188 | 10357858 | <a href="#">NM_054076</a>          | <a href="#">269120</a>    | opticin                        | <a href="#">Optc</a>               | 0.983 | 0.564  | 0.589582 | 0.805725 |
| 10189 | 10450212 | <a href="#">NM_152922</a>          | <a href="#">81701</a>     | EGF-like domain 8              | <a href="#">Egfl8</a>              | 0.983 | -0.11  | 0.915761 | 0.966695 |
| 10190 | 10392998 | <a href="#">NM_080643</a>          | <a href="#">140721</a>    | cask-interacting protein 2     | <a href="#">Caskin2</a>            | 0.983 | -0.581 | 0.578997 | 0.798586 |
| 10191 | 10467134 |                                    |                           |                                |                                    | 0.983 | -0.364 | 0.726467 | 0.881516 |
| 10192 | 10379511 | <a href="#">NM_011333</a>          | <a href="#">20296</a>     | chemokine (C-C motif) ligand 2 | <a href="#">Ccl2</a>               | 0.983 | -0.032 | 0.975588 | 0.989867 |
| 10193 | 10372191 | <a href="#">BC067068</a>           | <a href="#">216292</a>    | cDNA sequence BC067068         | <a href="#">BC067068</a>           | 0.983 | -0.35  | 0.73664  | 0.887367 |
| 10194 | 10411593 | <a href="#">BC001981</a>           | <a href="#">100049162</a> | predicted gene, ENSMUSG0000005 | <a href="#">ENSMUSG00000050599</a> | 0.983 | -0.147 | 0.887301 | 0.955613 |
| 10195 | 10393804 | <a href="#">NM_197995</a>          | <a href="#">70317</a>     | ADP-ribosylation factor-like 1 | <a href="#">Arl16</a>              | 0.983 | -0.565 | 0.589259 | 0.805593 |
| 10196 | 10565381 |                                    |                           |                                |                                    | 0.983 | -0.159 | 0.877977 | 0.951715 |
| 10197 | 10553004 | <a href="#">NM_025330</a>          | <a href="#">66065</a>     | hydroxysteroid (17-beta) dehyd | <a href="#">Hsd17b14</a>           | 0.983 | 0.093  | 0.928222 | 0.971746 |
| 10198 | 10603125 | <a href="#">NM_027027</a>          | <a href="#">69299</a>     | ankyrin repeat and SOCS box-co | <a href="#">Asb9</a>               | 0.983 | -0.099 | 0.923582 | 0.969694 |
| 10199 | 10603623 |                                    |                           |                                |                                    | 0.983 | 0.289  | 0.780414 | 0.910806 |
| 10200 | 10568115 | <a href="#">NM_080638</a>          | <a href="#">78388</a>     | major vault protein            | <a href="#">Mvp</a>                | 0.983 | 0.076  | 0.941397 | 0.977311 |
| 10201 | 10507653 |                                    |                           |                                |                                    | 0.983 | 0.207  | 0.841994 | 0.936059 |
| 10202 | 10388834 | <a href="#">NM_022411</a>          | <a href="#">20500</a>     | solute carrier family 13 (sodi | <a href="#">Slc13a2</a>            | 0.983 | 0.218  | 0.833729 | 0.932964 |
| 10203 | 10481560 | <a href="#">NM_183424</a>          | <a href="#">227717</a>    | pyroglutamylated RFamide pepti | <a href="#">Qrfp</a>               | 0.983 | -0.529 | 0.612426 | 0.820343 |
| 10204 | 10602770 | <a href="#">XR_002032</a>          | <a href="#">667483</a>    | predicted gene, EG667483       | <a href="#">EG667483</a>           | 0.983 | -0.15  | 0.884667 | 0.954694 |
| 10205 | 10569319 | <a href="#">NM_009983</a>          | <a href="#">13033</a>     | cathepsin D                    | <a href="#">Ctsd</a>               | 0.983 | -1.213 | 0.263511 | 0.53828  |
| 10206 | 10565067 | <a href="#">NM_026523</a>          | <a href="#">68039</a>     | neuromedin B                   | <a href="#">Nmb</a>                | 0.983 | -0.458 | 0.660189 | 0.848652 |
| 10207 | 10433910 | <a href="#">NM_011624</a>          | <a href="#">21976</a>     | topoisomerase (DNA) III beta   | <a href="#">Top3b</a>              | 0.983 | -0.837 | 0.429585 | 0.690576 |
| 10208 | 10564736 | <a href="#">NM_017462</a>          | <a href="#">18975</a>     | polymerase (DNA directed), gam | <a href="#">Polg</a>               | 0.983 | -0.446 | 0.668955 | 0.852739 |
| 10209 | 10454709 | <a href="#">NM_009004</a>          | <a href="#">19348</a>     | kinesin family member 20A      | <a href="#">Kif20a</a>             | 0.983 | -0.715 | 0.497251 | 0.741615 |
| 10210 | 10588109 | <a href="#">ENSMUST00000056103</a> | <a href="#">69797</a>     | RIKEN cDNA 1600029I14 gene     | <a href="#">1600029I14Rik</a>      | 0.983 | -0.056 | 0.956479 | 0.983504 |
| 10211 | 10415092 | <a href="#">ENSMUST00000038631</a> | <a href="#">75913</a>     | RIKEN cDNA 4930579G18 gene     | <a href="#">4930579G18Rik</a>      | 0.983 | -0.141 | 0.89191  | 0.95769  |
| 10212 | 10429428 | <a href="#">AK132992</a>           | <a href="#">268816</a>    | gene model 628, (NCBI)         | <a href="#">Gm628</a>              | 0.983 | 0.152  | 0.883573 | 0.954141 |
| 10213 | 10392721 | <a href="#">NM_026682</a>          | <a href="#">52670</a>     | cleavage and polyadenylation s | <a href="#">Cpsf4l</a>             | 0.983 | 0.05   | 0.961122 | 0.985069 |
| 10214 | 10421870 |                                    |                           |                                |                                    | 0.983 | 0.04   | 0.969432 | 0.987616 |
| 10215 | 10553057 | <a href="#">DQ534901</a>           | <a href="#">74490</a>     | RIKEN cDNA 5430432N15 gene     | <a href="#">5430432N15Rik</a>      | 0.983 | -0.162 | 0.875469 | 0.950704 |
| 10216 | 10559681 | <a href="#">NM_172737</a>          | <a href="#">232813</a>    | RIKEN cDNA D430041B17 gene     | <a href="#">D430041B17Rik</a>      | 0.983 | -0.083 | 0.936311 | 0.974999 |
| 10217 | 10497066 | <a href="#">NM_017381</a>          | <a href="#">53861</a>     | zinc finger, RAN-binding domai | <a href="#">Zranb2</a>             | 0.983 | -0.307 | 0.767687 | 0.903483 |
| 10218 | 10348570 | <a href="#">NM_001033292</a>       | <a href="#">227357</a>    | espin-like                     | <a href="#">Espnl</a>              | 0.983 | -0.081 | 0.937353 | 0.975526 |
| 10219 | 10517568 | <a href="#">NM_001126318</a>       | <a href="#">242711</a>    | novel protein similar to elast | <a href="#">RP23-246F18.6</a>      | 0.983 | -0.048 | 0.962795 | 0.985542 |
| 10220 | 10544150 | <a href="#">NM_001033430</a>       | <a href="#">338523</a>    | jumonji C domain-containing hi | <a href="#">Jhdm1d</a>             | 0.983 | -0.372 | 0.720254 | 0.878163 |
| 10221 | 10358928 | <a href="#">NM_009782</a>          | <a href="#">12290</a>     | calcium channel, voltage-depen | <a href="#">Cacna1e</a>            | 0.983 | -0.211 | 0.838389 | 0.934421 |
| 10222 | 10393774 | <a href="#">NM_199469</a>          | <a href="#">217365</a>    | nuclear protein localization 4 | <a href="#">Nploc4</a>             | 0.983 | -0.61  | 0.560736 | 0.78784  |
| 10223 | 10564726 | <a href="#">NM_020599</a>          | <a href="#">19771</a>     | retinaldehyde binding protein  | <a href="#">Rlbp1</a>              | 0.983 | -0.044 | 0.966166 | 0.986556 |
| 10224 | 10369898 | <a href="#">ENSMUST00000049520</a> | <a href="#">108950</a>    | RIKEN cDNA 1700049L16 gene     | <a href="#">1700049L16Rik</a>      | 0.983 | -0.724 | 0.492038 | 0.738272 |
| 10225 | 10415228 | <a href="#">NM_000047</a>          | <a href="#">12801</a>     | connexin VI                    | <a href="#">Cx36</a>               | 0.983 | 0.042  | 0.966595 | 0.986746 |

|       |          |                                    |                           |                                |                                    |       |        |          |          |
|-------|----------|------------------------------------|---------------------------|--------------------------------|------------------------------------|-------|--------|----------|----------|
| 10225 | 10415220 | <a href="#">NM_009947</a>          | <a href="#">12091</a>     | copine v1                      | <a href="#">Cpneo</a>              | 0.983 | 0.043  | 0.900363 | 0.980740 |
| 10226 | 10455346 | <a href="#">NM_001039474</a>       | <a href="#">56070</a>     | transcription elongation regul | <a href="#">Tcerg1</a>             | 0.983 | -0.486 | 0.641587 | 0.837649 |
| 10227 | 10348879 | <a href="#">NM_025454</a>          | <a href="#">66262</a>     | inhibitor of growth family, me | <a href="#">Ing5</a>               | 0.983 | -0.426 | 0.682551 | 0.859827 |
| 10228 | 10573549 | <a href="#">NM_026791</a>          | <a href="#">68628</a>     | F-box and WD-40 domain protein | <a href="#">Fbxw9</a>              | 0.983 | -0.66  | 0.530007 | 0.76526  |
| 10229 | 10532578 | <a href="#">XM_912851</a>          | <a href="#">74376</a>     | myosin XVIIIb                  | <a href="#">Myo18b</a>             | 0.983 | -0.068 | 0.94785  | 0.97949  |
| 10230 | 10489946 | <a href="#">NM_010072</a>          | <a href="#">13480</a>     | dolichol-phosphate (beta-D) ma | <a href="#">Dpm1</a>               | 0.983 | -0.536 | 0.608397 | 0.817693 |
| 10231 | 10552000 | <a href="#">NM_026961</a>          | <a href="#">69147</a>     | RIKEN cDNA 2200002J24 gene     | <a href="#">2200002J24Rik</a>      | 0.983 | -0.121 | 0.907011 | 0.963565 |
| 10232 | 10398649 | <a href="#">NM_028807</a>          | <a href="#">74190</a>     | RIKEN cDNA 1200009I06 gene     | <a href="#">1200009I06Rik</a>      | 0.983 | -0.173 | 0.867174 | 0.946934 |
| 10233 | 10440617 |                                    |                           |                                |                                    | 0.983 | -0.164 | 0.874581 | 0.949978 |
| 10234 | 10424573 | <a href="#">XR_032206</a>          | <a href="#">383051</a>    | similar to PRUNEM1             | <a href="#">LOC383051</a>          | 0.983 | -0.507 | 0.627609 | 0.830619 |
| 10235 | 10455312 | <a href="#">AY461716</a>           | <a href="#">225432</a>    | RNA binding motif protein 27   | <a href="#">Rbm27</a>              | 0.983 | -0.459 | 0.660071 | 0.848652 |
| 10236 | 10576816 | <a href="#">NM_026972</a>          | <a href="#">69165</a>     | CD209b antigen                 | <a href="#">Cd209b</a>             | 0.982 | 0.126  | 0.903484 | 0.962464 |
| 10237 | 10474492 | <a href="#">NM_146381</a>          | <a href="#">258379</a>    | olfactory receptor 1284        | <a href="#">Olf1284</a>            | 0.982 | 0.234  | 0.821745 | 0.92863  |
| 10238 | 10550627 | <a href="#">NM_175668</a>          | <a href="#">319197</a>    | G protein-coupled receptor 4   | <a href="#">Gpr4</a>               | 0.982 | -0.431 | 0.679335 | 0.857678 |
| 10239 | 10605674 | <a href="#">NM_008892</a>          | <a href="#">18968</a>     | polymerase (DNA directed), alp | <a href="#">Pola1</a>              | 0.982 | -0.621 | 0.553872 | 0.783297 |
| 10240 | 10393749 |                                    |                           |                                |                                    | 0.982 | -0.282 | 0.785626 | 0.912507 |
| 10241 | 10424557 | <a href="#">ENSMUST00000075602</a> | <a href="#">633752</a>    | predicted gene, EG633752       | <a href="#">EG633752</a>           | 0.982 | -0.353 | 0.734408 | 0.886559 |
| 10242 | 10512288 | <a href="#">BC047068</a>           | <a href="#">69961</a>     | RIKEN cDNA 2810432D09 gene     | <a href="#">2810432D09Rik</a>      | 0.982 | -0.679 | 0.51805  | 0.756834 |
| 10243 | 10604930 | <a href="#">XM_001474636</a>       | <a href="#">100040409</a> | similar to syndecan-1          | <a href="#">LOC100040409</a>       | 0.982 | -0.1   | 0.922945 | 0.969148 |
| 10244 | 10530516 | <a href="#">NM_001122754</a>       | <a href="#">22165</a>     | TXK tyrosine kinase            | <a href="#">Txk</a>                | 0.982 | -0.068 | 0.94761  | 0.979302 |
| 10245 | 10427241 | <a href="#">NM_001103165</a>       | <a href="#">18521</a>     | poly(rC) binding protein 2     | <a href="#">Pcbp2</a>              | 0.982 | -0.561 | 0.59174  | 0.806879 |
| 10246 | 10490221 | <a href="#">NM_025983</a>          | <a href="#">67126</a>     | ATP synthase, H+ transporting, | <a href="#">Atp5e</a>              | 0.982 | -1.112 | 0.301742 | 0.577902 |
| 10247 | 10511692 |                                    |                           |                                |                                    | 0.982 | -0.652 | 0.534712 | 0.768432 |
| 10248 | 10476270 | <a href="#">BC048399</a>           | <a href="#">69596</a>     | RIKEN cDNA 2310035K24 gene     | <a href="#">2310035K24Rik</a>      | 0.982 | -0.19  | 0.854704 | 0.941172 |
| 10249 | 10499839 | <a href="#">NM_133854</a>          | <a href="#">20615</a>     | SNAP-associated protein        | <a href="#">Snapin</a>             | 0.982 | -0.651 | 0.535442 | 0.769059 |
| 10250 | 10418164 | <a href="#">ENSMUST00000062438</a> | <a href="#">75163</a>     | RIKEN cDNA 4930542C16 gene     | <a href="#">4930542C16Rik</a>      | 0.982 | -0.157 | 0.879309 | 0.952124 |
| 10251 | 10517240 | <a href="#">NM_001099296</a>       | <a href="#">72690</a>     | glycine/arginine rich protein  | <a href="#">Grrp1</a>              | 0.982 | 0.034  | 0.973614 | 0.988697 |
| 10252 | 10385027 | <a href="#">ENSMUST00000020508</a> | <a href="#">69351</a>     | RIKEN cDNA 1700008A04 gene     | <a href="#">1700008A04Rik</a>      | 0.982 | -0.476 | 0.648413 | 0.841814 |
| 10253 | 10381111 | <a href="#">XR_001819</a>          | <a href="#">630936</a>    | similar to nuclease sensitive  | <a href="#">LOC630936</a>          | 0.982 | -0.468 | 0.653526 | 0.844695 |
| 10254 | 10439527 | <a href="#">ENSMUST00000096065</a> | <a href="#">100043314</a> | similar to poliovirus receptor | <a href="#">LOC100043314</a>       | 0.982 | -0.004 | 0.9967   | 0.998777 |
| 10255 | 10519124 | <a href="#">NM_008072</a>          | <a href="#">14403</a>     | gamma-aminobutyric acid (GABA- | <a href="#">Gabrd</a>              | 0.982 | 0.107  | 0.917753 | 0.967684 |
| 10256 | 10456599 | <a href="#">ENSMUST00000066583</a> | <a href="#">433202</a>    | predicted gene, ENSMUSG0000005 | <a href="#">ENSMUSG00000053861</a> | 0.982 | -0.173 | 0.867594 | 0.947004 |
| 10257 | 10535647 | <a href="#">NM_020582</a>          | <a href="#">57423</a>     | ATP synthase, H+ transporting, | <a href="#">Atp5j2</a>             | 0.982 | -1.058 | 0.324358 | 0.600843 |
| 10258 | 10535458 | <a href="#">NM_028379</a>          | <a href="#">72881</a>     | zinc finger, DHHC domain conta | <a href="#">Zdhhc4</a>             | 0.982 | -0.285 | 0.783602 | 0.912068 |
| 10259 | 10382284 | <a href="#">NM_021880</a>          | <a href="#">19084</a>     | protein kinase, cAMP dependent | <a href="#">Prkar1a</a>            | 0.982 | -0.523 | 0.61672  | 0.82302  |
| 10260 | 10433977 | <a href="#">ENSMUST00000069420</a> | <a href="#">224019</a>    | transmembrane protein 191C     | <a href="#">Tmem191c</a>           | 0.982 | -0.497 | 0.634279 | 0.833748 |
| 10261 | 10454735 | <a href="#">BC057111</a>           | <a href="#">66306</a>     | RIKEN cDNA 2810012G03 gene     | <a href="#">2810012G03Rik</a>      | 0.982 | -0.967 | 0.364673 | 0.635773 |
| 10262 | 10509267 | <a href="#">NM_009523</a>          | <a href="#">22417</a>     | wingless-related MMTV integrat | <a href="#">Wnt4</a>               | 0.982 | -0.232 | 0.822873 | 0.929127 |
| 10263 | 10601673 | <a href="#">NM_133196</a>          | <a href="#">108062</a>    | cleavage stimulation factor, 3 | <a href="#">Cstf2</a>              | 0.982 | -0.659 | 0.530382 | 0.765382 |
| 10264 | 10454326 | <a href="#">BC084681</a>           | <a href="#">68046</a>     | RIKEN cDNA 2700062C07 gene     | <a href="#">2700062C07Rik</a>      | 0.982 | -0.5   | 0.632172 | 0.832782 |
| 10265 | 10505919 |                                    |                           |                                |                                    | 0.982 | -0.033 | 0.974823 | 0.989376 |
| 10266 | 10357658 |                                    |                           |                                |                                    | 0.982 | 0.214  | 0.83668  | 0.934075 |
| 10267 | 10554061 | <a href="#">NM_001033877</a>       | <a href="#">233332</a>    | a disintegrin-like and metallo | <a href="#">Adamts17</a>           | 0.982 | 0.271  | 0.793849 | 0.91617  |
| 10268 | 10512999 | <a href="#">NM_001033454</a>       | <a href="#">381524</a>    | expressed sequence A1427809    | <a href="#">A1427809</a>           | 0.982 | -0.421 | 0.685998 | 0.861365 |
| 10269 | 10551435 | <a href="#">NM_001122603</a>       | <a href="#">215384</a>    | Fc fragment of IgG binding pro | <a href="#">Fcgbp</a>              | 0.982 | -0.328 | 0.751991 | 0.895376 |
| 10270 | 10451493 | <a href="#">ENSMUST00000086675</a> | <a href="#">442840</a>    | RIKEN cDNA A330017A19 gene     | <a href="#">A330017A19Rik</a>      | 0.982 | -0.079 | 0.939421 | 0.976362 |
| 10271 | 10561194 | <a href="#">NM_015782</a>          | <a href="#">53607</a>     | small nuclear ribonucleoprotei | <a href="#">Snrpa</a>              | 0.982 | -0.35  | 0.736562 | 0.887367 |
| 10272 | 10359908 | <a href="#">NM_009062</a>          | <a href="#">19736</a>     | regulator of G-protein signali | <a href="#">Rgs4</a>               | 0.982 | -0.156 | 0.880446 | 0.952526 |
| 10273 | 10370837 | <a href="#">NM_011548</a>          | <a href="#">21423</a>     | transcription factor E2a       | <a href="#">Tcf2a</a>              | 0.982 | -0.695 | 0.508845 | 0.750513 |

|       |          |                                    |                           |                                |                                    |       |        |          |          |
|-------|----------|------------------------------------|---------------------------|--------------------------------|------------------------------------|-------|--------|----------|----------|
| 10274 | 10381567 | <a href="#">NM_028076</a>          | <a href="#">72053</a>     | transmembrane and ubiquitin-li | <a href="#">Tmub2</a>              | 0.982 | -0.412 | 0.692255 | 0.865004 |
| 10275 | 10492590 | <a href="#">NM_178726</a>          | <a href="#">242083</a>    | protein phosphatase 1 (formerl | <a href="#">Ppm1l</a>              | 0.982 | -0.804 | 0.446924 | 0.70468  |
| 10276 | 10355864 | <a href="#">NM_001001566</a>       | <a href="#">74241</a>     | chondroitin polymerizing facto | <a href="#">Chpf</a>               | 0.982 | -0.306 | 0.768482 | 0.903765 |
| 10277 | 10505888 | <a href="#">NM_010505</a>          | <a href="#">15968</a>     | interferon alpha 5             | <a href="#">Ifna5</a>              | 0.982 | 0.189  | 0.855497 | 0.941478 |
| 10278 | 10555254 |                                    |                           |                                |                                    | 0.982 | 0.051  | 0.960862 | 0.985069 |
| 10279 | 10474683 |                                    |                           |                                |                                    | 0.982 | 0.212  | 0.838075 | 0.934421 |
| 10280 | 10429584 |                                    |                           |                                |                                    | 0.982 | -0.361 | 0.728102 | 0.882032 |
| 10281 | 10557624 |                                    |                           |                                |                                    | 0.982 | -0.342 | 0.74232  | 0.890171 |
| 10282 | 10590909 | <a href="#">NM_028013</a>          | <a href="#">71946</a>     | endonuclease domain containing | <a href="#">Endod1</a>             | 0.982 | -0.955 | 0.370405 | 0.641116 |
| 10283 | 10383532 | <a href="#">NM_026272</a>          | <a href="#">67608</a>     | nuclear prelamin A recognition | <a href="#">Narf</a>               | 0.982 | -0.54  | 0.605493 | 0.815969 |
| 10284 | 10462343 | <a href="#">ENSMUST00000065159</a> | <a href="#">433237</a>    | predicted gene, ENSMUSG0000005 | <a href="#">ENSMUSG00000052976</a> | 0.982 | -0.093 | 0.928073 | 0.971746 |
| 10285 | 10374880 | <a href="#">NM_133767</a>          | <a href="#">76784</a>     | mitochondrial translational in | <a href="#">Mtif2</a>              | 0.982 | -0.983 | 0.357536 | 0.629926 |
| 10286 | 10577946 |                                    |                           |                                |                                    | 0.982 | -0.366 | 0.725053 | 0.880804 |
| 10287 | 10480999 | <a href="#">NM_026563</a>          | <a href="#">68112</a>     | serologically defined colon ca | <a href="#">Sdccag3</a>            | 0.982 | -0.576 | 0.582385 | 0.800864 |
| 10288 | 10424945 | <a href="#">NM_010630</a>          | <a href="#">16581</a>     | kinesin family member C2       | <a href="#">Kifc2</a>              | 0.982 | 0.066  | 0.948917 | 0.980236 |
| 10289 | 10387890 | <a href="#">NM_023158</a>          | <a href="#">66102</a>     | chemokine (C-X-C motif) ligand | <a href="#">Cxcl16</a>             | 0.982 | -0.203 | 0.844439 | 0.936859 |
| 10290 | 10516721 | <a href="#">XR_032427</a>          | <a href="#">100040532</a> | similar to ribosomal protein L | <a href="#">LOC100040532</a>       | 0.982 | 0.093  | 0.928407 | 0.971746 |
| 10291 | 10362711 | <a href="#">NM_177793</a>          | <a href="#">327747</a>    | RIKEN cDNA 9030224M15 gene     | <a href="#">9030224M15Rik</a>      | 0.982 | 0.218  | 0.833298 | 0.932877 |
| 10292 | 10399782 | <a href="#">NM_009417</a>          | <a href="#">22018</a>     | thyroid peroxidase             | <a href="#">Tpo</a>                | 0.982 | -0.217 | 0.834475 | 0.933157 |
| 10293 | 10429957 | <a href="#">NM_013909</a>          | <a href="#">30840</a>     | F-box and leucine-rich repeat  | <a href="#">Fbxl6</a>              | 0.982 | 0.086  | 0.933893 | 0.973728 |
| 10294 | 10535780 | <a href="#">NM_010229</a>          | <a href="#">14255</a>     | FMS-like tyrosine kinase 3     | <a href="#">Flt3</a>               | 0.982 | -0.018 | 0.985892 | 0.994073 |
| 10295 | 10511207 | <a href="#">NM_028020</a>          | <a href="#">71957</a>     | cleavage and polyadenylation s | <a href="#">Cpsf3l</a>             | 0.982 | -0.58  | 0.579314 | 0.798918 |
| 10296 | 10369290 | <a href="#">NM_029083</a>          | <a href="#">74747</a>     | DNA-damage-inducible transcrip | <a href="#">Ddit4</a>              | 0.982 | -0.467 | 0.654283 | 0.845158 |
| 10297 | 10465005 | <a href="#">NM_001038231</a>       | <a href="#">23825</a>     | barrier to autointegration fac | <a href="#">Banf1</a>              | 0.982 | -0.961 | 0.367431 | 0.638358 |
| 10298 | 10449061 | <a href="#">NM_144816</a>          | <a href="#">214951</a>    | rhomoid, veinlet-like 1 (Dros  | <a href="#">Rhbd1l</a>             | 0.982 | -0.171 | 0.869198 | 0.947675 |
| 10299 | 10436804 | <a href="#">NM_029844</a>          | <a href="#">77037</a>     | melanocortin 2 receptor access | <a href="#">Mrap</a>               | 0.982 | -0.231 | 0.82398  | 0.929508 |
| 10300 | 10401128 | <a href="#">NM_008558</a>          | <a href="#">17187</a>     | Max protein                    | <a href="#">Max</a>                | 0.982 | -0.749 | 0.47778  | 0.7284   |
| 10301 | 10517600 | <a href="#">NM_026880</a>          | <a href="#">68943</a>     | PTEN induced putative kinase 1 | <a href="#">Pink1</a>              | 0.982 | -0.281 | 0.786907 | 0.912989 |
| 10302 | 10606554 | <a href="#">NM_138742</a>          | <a href="#">54561</a>     | nucleosome assembly protein 1- | <a href="#">Nap1l3</a>             | 0.982 | -1.521 | 0.170919 | 0.422729 |
| 10303 | 10531428 | <a href="#">NM_183392</a>          | <a href="#">269113</a>    | nucleoporin 54                 | <a href="#">Nup54</a>              | 0.982 | -0.558 | 0.593764 | 0.808198 |
| 10304 | 10578938 | <a href="#">NM_001033429</a>       | <a href="#">333307</a>    | tripartite motif-containing 75 | <a href="#">Trim75</a>             | 0.982 | -0.344 | 0.74047  | 0.889372 |
| 10305 | 10567173 | <a href="#">NM_011083</a>          | <a href="#">18704</a>     | phosphatidylinositol 3-kinase, | <a href="#">Pik3c2a</a>            | 0.982 | -0.587 | 0.574916 | 0.797076 |
| 10306 | 10522149 | <a href="#">NM_016786</a>          | <a href="#">53323</a>     | ubiquitin-conjugating enzyme E | <a href="#">Ube2k</a>              | 0.982 | -0.651 | 0.535259 | 0.768906 |
| 10307 | 10586039 | <a href="#">NM_001083927</a>       | <a href="#">21887</a>     | transducin-like enhancer of sp | <a href="#">Tle3</a>               | 0.982 | -0.694 | 0.509484 | 0.750804 |
| 10308 | 10556242 |                                    |                           |                                |                                    | 0.982 | 0.125  | 0.903973 | 0.962757 |
| 10309 | 10466404 |                                    |                           |                                |                                    | 0.982 | -0.553 | 0.596997 | 0.810251 |
| 10310 | 10376366 | <a href="#">NM_001083884</a>       | <a href="#">70163</a>     | RIKEN cDNA 2210415F13 gene     | <a href="#">2210415F13Rik</a>      | 0.982 | 0.11   | 0.915449 | 0.966659 |
| 10311 | 10414168 | <a href="#">NM_173418</a>          | <a href="#">239038</a>    | leucine-rich repeat, immunoglo | <a href="#">Lrit2</a>              | 0.982 | 0.002  | 0.99867  | 0.999521 |
| 10312 | 10379342 |                                    |                           |                                |                                    | 0.982 | -0.161 | 0.876766 | 0.951319 |
| 10313 | 10436196 |                                    |                           |                                |                                    | 0.982 | -0.306 | 0.768394 | 0.903712 |
| 10314 | 10427301 |                                    |                           |                                |                                    | 0.982 | -0.222 | 0.830714 | 0.932075 |
| 10315 | 10428070 | <a href="#">AK020480</a>           | <a href="#">77358</a>     | RIKEN cDNA 9430069I07 gene     | <a href="#">9430069I07Rik</a>      | 0.982 | -0.005 | 0.996462 | 0.998723 |
| 10316 | 10460513 | <a href="#">NM_175383</a>          | <a href="#">108902</a>    | UDP-GlcNAc:betaGal beta-1,3-N- | <a href="#">B3gnt1</a>             | 0.982 | -0.663 | 0.527867 | 0.763369 |
| 10317 | 10576799 | <a href="#">NM_130905</a>          | <a href="#">170780</a>    | CD209e antigen                 | <a href="#">Cd209e</a>             | 0.982 | -0.086 | 0.933508 | 0.973422 |
| 10318 | 10501143 | <a href="#">NM_145542</a>          | <a href="#">229709</a>    | S-adenosylhomocysteine hydrola | <a href="#">Ahcyl1</a>             | 0.982 | -0.607 | 0.562517 | 0.789713 |
| 10319 | 10552425 | <a href="#">BC112410</a>           | <a href="#">75690</a>     | RIKEN cDNA 2210412E05 gene     | <a href="#">2210412E05Rik</a>      | 0.982 | -0.619 | 0.554976 | 0.783898 |
| 10320 | 10440463 | <a href="#">XR_031142</a>          | <a href="#">383172</a>    | predicted gene, EG383172       | <a href="#">EG383172</a>           | 0.982 | -0.707 | 0.501487 | 0.744504 |
| 10321 | 10521031 | <a href="#">NM_011738</a>          | <a href="#">22629</a>     | tyrosine 3-monooxygenase/trypt | <a href="#">Ywhah</a>              | 0.982 | -0.563 | 0.590592 | 0.80632  |
| 10322 | 10403765 | <a href="#">NM_172120</a>          | <a href="#">218035</a>    | vacuolar protein sorting 41 (y | <a href="#">Vps4l</a>              | 0.982 | -0.947 | 0.374347 | 0.644466 |
| 10323 | 10377681 | <a href="#">NM_026017</a>          | <a href="#">67181</a>     | Dullard homolog (Xenopus laevi | <a href="#">Dullard</a>            | 0.982 | -0.905 | 0.394531 | 0.662113 |
| 10324 | 10588931 | <a href="#">BC048562</a>           | <a href="#">434439</a>    | cDNA sequence BC048562         | <a href="#">BC048562</a>           | 0.981 | 0.371  | 0.721057 | 0.878601 |
| 10325 | 10442954 | <a href="#">NM_009733</a>          | <a href="#">12005</a>     | axin 1                         | <a href="#">Axin1</a>              | 0.981 | -0.587 | 0.574889 | 0.797076 |
| 10326 | 10543676 | <a href="#">ENSMUST00000059487</a> | <a href="#">73533</a>     | RIKEN cDNA 1700080G18 gene     | <a href="#">1700080G18Rik</a>      | 0.981 | -0.658 | 0.531167 | 0.765576 |
| 10327 | 10485361 | <a href="#">BC025075</a>           | <a href="#">68170</a>     | RIKEN cDNA B230118H07          | <a href="#">B230118H07Rik</a>      | 0.981 | 1.000  | 0.30706  | 0.583646 |

|       |          |                              |                        |                                |                                    |       |        |          |          |
|-------|----------|------------------------------|------------------------|--------------------------------|------------------------------------|-------|--------|----------|----------|
| 10327 | 10463501 | <a href="#">BC025073</a>     | <a href="#">66170</a>  | gene                           | <a href="#">D230116107Rik</a>      | 0.981 | -1.099 | 0.50700  | 0.583040 |
| 10328 | 10380751 | <a href="#">NM_025927</a>    | <a href="#">67036</a>  | mitochondrial ribosomal protei | <a href="#">Mrpl45</a>             | 0.981 | -0.678 | 0.518937 | 0.757293 |
| 10329 | 10586176 | <a href="#">NM_183316</a>    | <a href="#">330959</a> | small nuclear RNA activating c | <a href="#">Snapc5</a>             | 0.981 | -0.576 | 0.581864 | 0.800451 |
| 10330 | 10461475 | <a href="#">NM_172302</a>    | <a href="#">269061</a> | RIKEN cDNA 57304531I6 gene     | <a href="#">57304531I6Rik</a>      | 0.981 | -0.652 | 0.534572 | 0.768432 |
| 10331 | 10540405 | <a href="#">BC045208</a>     | <a href="#">74729</a>  | SET domain and mariner transpo | <a href="#">Setmar</a>             | 0.981 | -0.347 | 0.738333 | 0.888438 |
| 10332 | 10394690 | <a href="#">NM_033270</a>    | <a href="#">50496</a>  | E2F transcription factor 6     | <a href="#">E2f6</a>               | 0.981 | -1.019 | 0.341311 | 0.616096 |
| 10333 | 10460397 | <a href="#">AK137104</a>     | <a href="#">619307</a> | RIKEN cDNA 9430078G10 gene     | <a href="#">9430078G10Rik</a>      | 0.981 | -0.414 | 0.691012 | 0.864447 |
| 10334 | 10478997 | <a href="#">NM_009335</a>    | <a href="#">21420</a>  | transcription factor AP-2, gam | <a href="#">Tcfap2c</a>            | 0.981 | 0.042  | 0.967717 | 0.987137 |
| 10335 | 10561266 | <a href="#">NM_032610</a>    | <a href="#">80297</a>  | spectrin beta 4                | <a href="#">Sspb4</a>              | 0.981 | -0.018 | 0.98608  | 0.994146 |
| 10336 | 10348070 | <a href="#">NM_010880</a>    | <a href="#">17975</a>  | nucleolin                      | <a href="#">Ncl</a>                | 0.981 | -0.453 | 0.664062 | 0.850267 |
| 10337 | 10439276 | <a href="#">NM_027342</a>    | <a href="#">70186</a>  | RIKEN cDNA 2310056P07 gene     | <a href="#">2310056P07Rik</a>      | 0.981 | -1.015 | 0.343087 | 0.617171 |
| 10338 | 10352717 | <a href="#">NM_030060</a>    | <a href="#">381319</a> | basic leucine zipper transcrip | <a href="#">Batf3</a>              | 0.981 | -0.254 | 0.806554 | 0.921832 |
| 10339 | 10517243 | <a href="#">NM_146156</a>    | <a href="#">230809</a> | PDLIM1 interacting kinase 1 li | <a href="#">Pdik1l</a>             | 0.981 | -0.617 | 0.556142 | 0.784723 |
| 10340 | 10568215 |                              |                        |                                |                                    | 0.981 | -0.056 | 0.956983 | 0.983559 |
| 10341 | 10584352 | <a href="#">NM_146882</a>    | <a href="#">258882</a> | olfactory receptor 874         | <a href="#">Olfir874</a>           | 0.981 | -0.419 | 0.687572 | 0.862228 |
| 10342 | 10437272 | <a href="#">NM_001081280</a> | <a href="#">268857</a> | NLR family, CARD domain contai | <a href="#">Nlrc3</a>              | 0.981 | 0.066  | 0.948966 | 0.980236 |
| 10343 | 10379117 | <a href="#">NM_001045522</a> | <a href="#">216976</a> | cDNA sequence BC030499         | <a href="#">BC030499</a>           | 0.981 | 0.453  | 0.664088 | 0.850267 |
| 10344 | 10454984 | <a href="#">NM_026464</a>    | <a href="#">67936</a>  | WD repeat domain 55            | <a href="#">Wdr55</a>              | 0.981 | -0.436 | 0.675731 | 0.855911 |
| 10345 | 10513912 | <a href="#">EF662061</a>     | <a href="#">353204</a> | aldolase 1, A isoform, retroge | <a href="#">Aldoat1</a>            | 0.981 | -0.202 | 0.845823 | 0.937284 |
| 10346 | 10426891 | <a href="#">NM_027334</a>    | <a href="#">70152</a>  | methyltransferase like 7A1     | <a href="#">Mettl7a1</a>           | 0.981 | -0.708 | 0.501193 | 0.744202 |
| 10347 | 10445458 | <a href="#">NM_028198</a>    | <a href="#">72322</a>  | exportin 5                     | <a href="#">Xpo5</a>               | 0.981 | -0.849 | 0.423071 | 0.685314 |
| 10348 | 10604245 |                              |                        |                                |                                    | 0.981 | 0.001  | 0.999275 | 0.999589 |
| 10349 | 10399214 | <a href="#">NM_016676</a>    | <a href="#">19325</a>  | RAB10, member RAS oncogene fam | <a href="#">Rab10</a>              | 0.981 | -0.765 | 0.46838  | 0.720616 |
| 10350 | 10524338 | <a href="#">NM_023695</a>    | <a href="#">12960</a>  | crystallin, beta B1            | <a href="#">Crybb1</a>             | 0.981 | -0.057 | 0.955819 | 0.98316  |
| 10351 | 10348521 | <a href="#">NM_001033408</a> | <a href="#">329207</a> | RNA binding motif protein 44   | <a href="#">Rbm44</a>              | 0.981 | -0.114 | 0.91241  | 0.965082 |
| 10352 | 10458461 | <a href="#">NM_010411</a>    | <a href="#">15183</a>  | histone deacetylase 3          | <a href="#">Hdac3</a>              | 0.981 | -0.619 | 0.555135 | 0.783898 |
| 10353 | 10545859 | <a href="#">NM_020596</a>    | <a href="#">13656</a>  | early growth response 4        | <a href="#">Egr4</a>               | 0.981 | -0.166 | 0.872606 | 0.949165 |
| 10354 | 10368780 | <a href="#">NM_199058</a>    | <a href="#">140741</a> | G protein-coupled receptor 6   | <a href="#">Gpr6</a>               | 0.981 | 0.433  | 0.677585 | 0.856701 |
| 10355 | 10515924 | <a href="#">BC057371</a>     | <a href="#">194237</a> | cDNA sequence BC057371         | <a href="#">BC057371</a>           | 0.981 | -0.091 | 0.929617 | 0.972207 |
| 10356 | 10418244 | <a href="#">AK076950</a>     | <a href="#">791355</a> | predicted gene, ENSMUSG0000005 | <a href="#">ENSMUSG00000053165</a> | 0.981 | -0.757 | 0.472844 | 0.724458 |
| 10357 | 10382935 | <a href="#">NM_198022</a>    | <a href="#">217351</a> | trinucleotide repeat containin | <a href="#">Tnrc6c</a>             | 0.981 | -0.424 | 0.68374  | 0.860022 |
| 10358 | 10460767 | <a href="#">NM_028967</a>    | <a href="#">74481</a>  | basic leucine zipper transcrip | <a href="#">Batf2</a>              | 0.981 | 0.014  | 0.988921 | 0.995308 |
| 10359 | 10575672 | <a href="#">NM_029139</a>    | <a href="#">668110</a> | RIKEN cDNA 4930481F22 gene     | <a href="#">4930481F22Rik</a>      | 0.981 | 0.272  | 0.793492 | 0.915908 |
| 10360 | 10419674 |                              |                        |                                |                                    | 0.981 | 0.191  | 0.8536   | 0.940713 |
| 10361 | 10564482 | <a href="#">NM_201639</a>    | <a href="#">233335</a> | desmuslin                      | <a href="#">Dmn</a>                | 0.981 | -0.736 | 0.485013 | 0.733398 |
| 10362 | 10397651 | <a href="#">NM_178914</a>    | <a href="#">104871</a> | spermatogenesis associated 7   | <a href="#">Spata7</a>             | 0.981 | -0.243 | 0.814846 | 0.925748 |
| 10363 | 10511881 | <a href="#">NM_172865</a>    | <a href="#">242362</a> | mannosidase, endo-alpha        | <a href="#">Manea</a>              | 0.981 | -0.657 | 0.5318   | 0.766019 |
| 10364 | 10503484 | <a href="#">BC096046</a>     | <a href="#">66302</a>  | RIKEN cDNA 2410005O16 gene     | <a href="#">2410005O16Rik</a>      | 0.981 | -0.439 | 0.673339 | 0.854824 |
| 10365 | 10378549 | <a href="#">NM_177708</a>    | <a href="#">237847</a> | reticulon 4 receptor-like 1    | <a href="#">Rtn4rl1</a>            | 0.981 | -0.069 | 0.946709 | 0.978837 |
| 10366 | 10425741 | <a href="#">NM_029066</a>    | <a href="#">74716</a>  | WBP2 N-terminal like           | <a href="#">Wbp2nl</a>             | 0.981 | -0.577 | 0.581605 | 0.800408 |
| 10367 | 10370007 | <a href="#">NM_029472</a>    | <a href="#">75886</a>  | glutathione S-transferase, the | <a href="#">Gstt4</a>              | 0.981 | 0.12   | 0.907438 | 0.963723 |
| 10368 | 10464772 | <a href="#">BC021951</a>     | <a href="#">69861</a>  | RIKEN cDNA 2010003K11 gene     | <a href="#">2010003K11Rik</a>      | 0.981 | -0.066 | 0.948976 | 0.980236 |
| 10369 | 10478299 | <a href="#">NM_001081338</a> | <a href="#">241764</a> | l(3)mbl-like (Drosophila)      | <a href="#">L3mbtl</a>             | 0.981 | -0.518 | 0.619702 | 0.825021 |
| 10370 | 10406681 | <a href="#">NM_009680</a>    | <a href="#">11774</a>  | adaptor-related protein comple | <a href="#">Ap3b1</a>              | 0.981 | -0.631 | 0.547756 | 0.778543 |
| 10371 | 10601547 |                              |                        |                                |                                    | 0.981 | 0.025  | 0.980568 | 0.991919 |
| 10372 | 10574962 | <a href="#">NM_010901</a>    | <a href="#">18021</a>  | nuclear factor of activated T- | <a href="#">Nfatc3</a>             | 0.981 | -0.802 | 0.448351 | 0.705929 |
| 10373 | 10357790 | <a href="#">NM_011439</a>    | <a href="#">20668</a>  | SRY-box containing gene 13     | <a href="#">Sox13</a>              | 0.981 | -0.643 | 0.53989  | 0.772463 |
| 10374 | 10354816 | <a href="#">NM_001042634</a> | <a href="#">12747</a>  | CDC-like kinase 1              | <a href="#">Clk1</a>               | 0.981 | -0.246 | 0.81282  | 0.924689 |
| 10375 | 10509820 | <a href="#">NM_173867</a>    | <a href="#">108911</a> | regulator of chromosome conden | <a href="#">Rcc2</a>               | 0.981 | -0.594 | 0.570747 | 0.795023 |
| 10376 | 10364792 | <a href="#">NM_183152</a>    | <a href="#">216166</a> | RIKEN cDNA 6330514A18 gene     | <a href="#">6330514A18Rik</a>      | 0.981 | 0.047  | 0.963852 | 0.985834 |
| 10377 | 10441195 | <a href="#">NM_031174</a>    | <a href="#">13508</a>  | Down syndrome cell adhesion mo | <a href="#">Dscam</a>              | 0.981 | 0.319  | 0.758861 | 0.899051 |

|       |          |                                    |                           |                                |                                    |       |        |          |          |
|-------|----------|------------------------------------|---------------------------|--------------------------------|------------------------------------|-------|--------|----------|----------|
| 10378 | 10525893 | <a href="#">NM_030210</a>          | <a href="#">78894</a>     | acetoacetyl-CoA synthetase     | <a href="#">Aacs</a>               | 0.981 | -0.338 | 0.744656 | 0.891513 |
| 10379 | 10547492 | <a href="#">NM_026028</a>          | <a href="#">67200</a>     | coiled-coil domain containing  | <a href="#">Ccdc77</a>             | 0.981 | -0.943 | 0.376203 | 0.646281 |
| 10380 | 10389882 | <a href="#">NM_026313</a>          | <a href="#">67684</a>     | RIKEN cDNA 3300001P08 gene     | <a href="#">3300001P08Rik</a>      | 0.981 | -0.345 | 0.739702 | 0.889275 |
| 10381 | 10569134 | <a href="#">NM_016874</a>          | <a href="#">54006</a>     | deformed epidermal autoregulat | <a href="#">Deaf1</a>              | 0.981 | -0.205 | 0.843565 | 0.936586 |
| 10382 | 10456619 |                                    |                           |                                |                                    | 0.981 | -0.382 | 0.713387 | 0.874578 |
| 10383 | 10372003 |                                    |                           |                                |                                    | 0.981 | -0.294 | 0.776994 | 0.909262 |
| 10384 | 10384219 | <a href="#">XR_033922</a>          | <a href="#">665339</a>    | similar to RBBP5 protein       | <a href="#">LOC665339</a>          | 0.981 | -0.364 | 0.726405 | 0.881516 |
| 10385 | 10507726 | <a href="#">NM_019563</a>          | <a href="#">56222</a>     | Cbp/p300-interacting transacti | <a href="#">Cited4</a>             | 0.981 | -0.761 | 0.470844 | 0.722723 |
| 10386 | 10563558 | <a href="#">NM_013789</a>          | <a href="#">27414</a>     | secretion regulating guanine n | <a href="#">Sergef</a>             | 0.981 | -0.176 | 0.864869 | 0.946153 |
| 10387 | 10575476 | <a href="#">NM_146216</a>          | <a href="#">234729</a>    | Vac14 homolog (S. cerevisiae)  | <a href="#">Vac14</a>              | 0.981 | -0.767 | 0.467683 | 0.720331 |
| 10388 | 10452087 | <a href="#">NM_001029979</a>       | <a href="#">224902</a>    | scaffold attachment factor B2  | <a href="#">Safb2</a>              | 0.981 | -0.568 | 0.587161 | 0.80408  |
| 10389 | 10502805 | <a href="#">NM_008966</a>          | <a href="#">19220</a>     | prostaglandin F receptor       | <a href="#">Ptgfr</a>              | 0.981 | -0.159 | 0.878259 | 0.951767 |
| 10390 | 10500237 | <a href="#">BC067054</a>           | <a href="#">75137</a>     | RIKEN cDNA 4930535B03 gene     | <a href="#">4930535B03Rik</a>      | 0.981 | -0.776 | 0.462591 | 0.717093 |
| 10391 | 10574421 | <a href="#">ENSMUST00000098469</a> | <a href="#">100038583</a> | predicted gene, ENSMUSG0000007 | <a href="#">ENSMUSG00000074134</a> | 0.981 | -0.274 | 0.791487 | 0.915192 |
| 10392 | 10439357 | <a href="#">NM_001037321</a>       | <a href="#">207215</a>    | F-box protein 40               | <a href="#">Fbxo40</a>             | 0.981 | -0.528 | 0.61329  | 0.820877 |
| 10393 | 10518570 | <a href="#">NM_001081274</a>       | <a href="#">110208</a>    | phosphogluconate dehydrogenase | <a href="#">Pgd</a>                | 0.981 | -0.901 | 0.396586 | 0.663981 |
| 10394 | 10584698 |                                    |                           |                                |                                    | 0.981 | 0.121  | 0.906693 | 0.963405 |
| 10395 | 10453518 | <a href="#">NM_020252</a>          | <a href="#">18189</a>     | neurexin I                     | <a href="#">Nrxn1</a>              | 0.981 | -0.391 | 0.707041 | 0.872175 |
| 10396 | 10561031 | <a href="#">NM_010719</a>          | <a href="#">16890</a>     | lipase, hormone sensitive      | <a href="#">Lipe</a>               | 0.981 | -0.176 | 0.864963 | 0.946153 |
| 10397 | 10540248 | <a href="#">NM_001113198</a>       | <a href="#">17342</a>     | microphthalmia-associated tran | <a href="#">Mitf</a>               | 0.981 | -0.43  | 0.679833 | 0.857865 |
| 10398 | 10372457 | <a href="#">NM_025706</a>          | <a href="#">66687</a>     | TBC1 domain family, member 15  | <a href="#">Tbc1d15</a>            | 0.981 | -0.46  | 0.659106 | 0.848007 |
| 10399 | 10527268 | <a href="#">NM_008886</a>          | <a href="#">18861</a>     | postmeiotic segregation increa | <a href="#">Pms2</a>               | 0.981 | -0.879 | 0.407776 | 0.672177 |
| 10400 | 10410092 | <a href="#">NM_175494</a>          | <a href="#">238673</a>    | zinc finger protein 367        | <a href="#">Zfp367</a>             | 0.981 | -0.364 | 0.726292 | 0.881516 |
| 10401 | 10576524 | <a href="#">NM_001111141</a>       | <a href="#">244666</a>    | gene model 505, (NCBI)         | <a href="#">Gm505</a>              | 0.981 | -0.806 | 0.445811 | 0.703765 |
| 10402 | 10572497 | <a href="#">NM_008353</a>          | <a href="#">16161</a>     | interleukin 12 receptor, beta  | <a href="#">Il12rb1</a>            | 0.98  | 0.325  | 0.754124 | 0.896425 |
| 10403 | 10360315 | <a href="#">EF032497</a>           | <a href="#">677296</a>    | Fc receptor-like 6             | <a href="#">Fcr16</a>              | 0.98  | 0.195  | 0.850899 | 0.94008  |
| 10404 | 10436024 | <a href="#">NM_008099</a>          | <a href="#">14525</a>     | germinal center expressed tran | <a href="#">Geet2</a>              | 0.98  | -0.335 | 0.747053 | 0.892497 |
| 10405 | 10383993 | <a href="#">NM_134033</a>          | <a href="#">104479</a>    | coiled-coil domain containing  | <a href="#">Ccdc117</a>            | 0.98  | -1.003 | 0.348344 | 0.622132 |
| 10406 | 10388994 | <a href="#">ENSMUST00000100734</a> | <a href="#">100038598</a> | predicted gene, ENSMUSG0000007 | <a href="#">ENSMUSG00000072631</a> | 0.98  | -0.303 | 0.77036  | 0.905061 |
| 10407 | 10451081 | <a href="#">XM_910980</a>          | <a href="#">635812</a>    | similar to CG8435-PA           | <a href="#">LOC635812</a>          | 0.98  | -0.469 | 0.65275  | 0.844541 |
| 10408 | 10424810 | <a href="#">NM_010331</a>          | <a href="#">14731</a>     | GPI anchor attachment protein  | <a href="#">Gpaal</a>              | 0.98  | -0.661 | 0.529203 | 0.76441  |
| 10409 | 10365170 | <a href="#">ENSMUST00000099442</a> | <a href="#">268319</a>    | cDNA sequence BC025920         | <a href="#">BC025920</a>           | 0.98  | -0.442 | 0.671749 | 0.854369 |
| 10410 | 10607346 | <a href="#">NM_029836</a>          | <a href="#">52808</a>     | TSPY-like 2                    | <a href="#">Tspy12</a>             | 0.98  | -0.744 | 0.480239 | 0.729941 |
| 10411 | 10474307 | <a href="#">BC057916</a>           | <a href="#">74088</a>     | RIKEN cDNA 0610012H03 gene     | <a href="#">0610012H03Rik</a>      | 0.98  | -0.189 | 0.85498  | 0.941302 |
| 10412 | 10532588 | <a href="#">XM_912851</a>          | <a href="#">74376</a>     | myosin XVIIIb                  | <a href="#">Myo18b</a>             | 0.98  | -0.119 | 0.908889 | 0.963765 |
| 10413 | 10493421 | <a href="#">BC088990</a>           | <a href="#">68521</a>     | RIKEN cDNA 1110013L07 gene     | <a href="#">1110013L07Rik</a>      | 0.98  | -0.421 | 0.686309 | 0.861515 |
| 10414 | 10390258 | <a href="#">NM_028965</a>          | <a href="#">74479</a>     | sorting nexin 11               | <a href="#">Snx11</a>              | 0.98  | -0.24  | 0.817296 | 0.927212 |
| 10415 | 10382542 | <a href="#">NM_001002929</a>       | <a href="#">445007</a>    | nucleoporin 85                 | <a href="#">Nup85</a>              | 0.98  | -0.156 | 0.880207 | 0.952468 |
| 10416 | 10431558 | <a href="#">BC087962</a>           | <a href="#">70113</a>     | RIKEN cDNA 2010001J22 gene     | <a href="#">2010001J22Rik</a>      | 0.98  | -0.172 | 0.868361 | 0.947244 |
| 10417 | 10365428 | <a href="#">NM_028709</a>          | <a href="#">74007</a>     | BTB (POZ) domain containing 11 | <a href="#">Btbd11</a>             | 0.98  | -0.331 | 0.750233 | 0.894442 |
| 10418 | 10371154 | <a href="#">NM_001014836</a>       | <a href="#">432479</a>    | RIKEN cDNA 4930404N11 gene     | <a href="#">4930404N11Rik</a>      | 0.98  | -0.445 | 0.669545 | 0.852924 |
| 10419 | 10433161 | <a href="#">XR_033297</a>          | <a href="#">668321</a>    | similar to MARCKS-like protein | <a href="#">LOC668321</a>          | 0.98  | -0.027 | 0.978902 | 0.991611 |
| 10420 | 10358155 | <a href="#">XR_033650</a>          | <a href="#">76422</a>     | RIKEN cDNA 2310006M14 gene     | <a href="#">2310006M14Rik</a>      | 0.98  | -0.172 | 0.86805  | 0.947171 |
| 10421 | 10596265 |                                    |                           |                                |                                    | 0.98  | -0.577 | 0.581271 | 0.80031  |
| 10422 | 10400210 | <a href="#">ENSMUST00000042052</a> | <a href="#">207304</a>    | HECT domain containing 1       | <a href="#">Hectd1</a>             | 0.98  | -0.548 | 0.60045  | 0.812278 |
| 10423 | 10345352 |                                    |                           |                                |                                    | 0.98  | 0.314  | 0.76226  | 0.901088 |
| 10424 | 10547088 | <a href="#">NM_010774</a>          | <a href="#">17193</a>     | methyl-CpG binding domain prot | <a href="#">Mbd4</a>               | 0.98  | -1.083 | 0.313607 | 0.59037  |
| 10425 | 10454782 | <a href="#">NM_007913</a>          | <a href="#">13653</a>     | early growth response 1        | <a href="#">Egr1</a>               | 0.98  | -0.288 | 0.781693 | 0.911343 |
| 10426 | 10589503 | <a href="#">NM_001081381</a>       | <a href="#">72341</a>     | transmembrane protein 103      | <a href="#">Tmem103</a>            | 0.98  | -0.311 | 0.764314 | 0.90173  |

|       |          |                                    |                           |                                |                               |      |        |          |          |
|-------|----------|------------------------------------|---------------------------|--------------------------------|-------------------------------|------|--------|----------|----------|
| 10420 | 10597505 | <a href="#">NM_001091391</a>       | <a href="#">72371</a>     | transmembrane protein 105      | <a href="#">Tmem105</a>       | 0.98 | -0.511 | 0.707517 | 0.70175  |
| 10427 | 10574288 | <a href="#">NM_001042715</a>       | <a href="#">330830</a>    | coiled-coil domain containing  | <a href="#">Ccdc135</a>       | 0.98 | -0.415 | 0.690272 | 0.864076 |
| 10428 | 10571036 | <a href="#">NM_028000</a>          | <a href="#">71910</a>     | phosphatidic acid phosphatase  | <a href="#">Ppapdc1</a>       | 0.98 | -0.644 | 0.539472 | 0.772177 |
| 10429 | 10435821 | <a href="#">NM_028108</a>          | <a href="#">72117</a>     | N-acetyltransferase 13         | <a href="#">Nat13</a>         | 0.98 | -0.637 | 0.544092 | 0.776215 |
| 10430 | 10569953 | <a href="#">NM_133968</a>          | <a href="#">102209</a>    | small nuclear RNA activating c | <a href="#">Snopc2</a>        | 0.98 | -0.435 | 0.676134 | 0.855911 |
| 10431 | 10427687 | <a href="#">NM_177123</a>          | <a href="#">320277</a>    | sperm flagellar 2              | <a href="#">Spef2</a>         | 0.98 | 0.438  | 0.674288 | 0.855309 |
| 10432 | 10376615 | <a href="#">NM_010862</a>          | <a href="#">17910</a>     | myosin XV                      | <a href="#">Myo15</a>         | 0.98 | -0.116 | 0.910541 | 0.964214 |
| 10433 | 10533751 | <a href="#">NM_011256</a>          | <a href="#">19679</a>     | phosphatidylinositol transfer  | <a href="#">Pitpnm2</a>       | 0.98 | -0.387 | 0.709646 | 0.872992 |
| 10434 | 10588975 | <a href="#">NM_027804</a>          | <a href="#">71472</a>     | ubiquitin specific peptidase 1 | <a href="#">Usp19</a>         | 0.98 | -0.262 | 0.800316 | 0.919317 |
| 10435 | 10380514 | <a href="#">BC055690</a>           | <a href="#">215512</a>    | RIKEN cDNA 5730593F17 gene     | <a href="#">5730593F17Rik</a> | 0.98 | 0.006  | 0.995053 | 0.998075 |
| 10436 | 10428931 |                                    |                           |                                |                               | 0.98 | -0.126 | 0.903283 | 0.962361 |
| 10437 | 10372766 | <a href="#">NM_080446</a>          | <a href="#">117599</a>    | helicase (DNA) B               | <a href="#">Helb</a>          | 0.98 | -0.665 | 0.527011 | 0.762858 |
| 10438 | 10380109 | <a href="#">NM_001045527</a>       | <a href="#">327992</a>    | heat shock transcription facto | <a href="#">Hsf5</a>          | 0.98 | -0.23  | 0.824251 | 0.929508 |
| 10439 | 10562152 | <a href="#">NM_010758</a>          | <a href="#">17136</a>     | myelin-associated glycoprotein | <a href="#">Mag</a>           | 0.98 | -0.316 | 0.760643 | 0.900103 |
| 10440 | 10402659 | <a href="#">NM_175207</a>          | <a href="#">74251</a>     | ankyrin repeat domain 9        | <a href="#">Ankrd9</a>        | 0.98 | -0.169 | 0.870319 | 0.948265 |
| 10441 | 10570955 | <a href="#">ENSMUST00000061860</a> | <a href="#">71655</a>     | RIKEN cDNA 4930518F22 gene     | <a href="#">4930518F22Rik</a> | 0.98 | -0.099 | 0.9239   | 0.96976  |
| 10442 | 10539238 | <a href="#">NM_145570</a>          | <a href="#">232146</a>    | transmembrane protein 166      | <a href="#">Tmem166</a>       | 0.98 | -0.249 | 0.810188 | 0.923433 |
| 10443 | 10413640 | <a href="#">NM_011849</a>          | <a href="#">23955</a>     | NIMA (never in mitosis gene a) | <a href="#">Nek4</a>          | 0.98 | -0.439 | 0.67329  | 0.854824 |
| 10444 | 10567316 | <a href="#">NM_172476</a>          | <a href="#">209760</a>    | transmembrane channel-like gen | <a href="#">Tmc7</a>          | 0.98 | -0.367 | 0.723964 | 0.88046  |
| 10445 | 10563816 | <a href="#">NM_001115087</a>       | <a href="#">100040608</a> | Fanconi anemia, complementatio | <a href="#">Fancf</a>         | 0.98 | -0.589 | 0.57407  | 0.797076 |
| 10446 | 10469140 |                                    |                           |                                |                               | 0.98 | 0.033  | 0.974506 | 0.989196 |
| 10447 | 10428561 | <a href="#">NM_009009</a>          | <a href="#">19357</a>     | RAD21 homolog (S. pombe)       | <a href="#">Rad21</a>         | 0.98 | -0.742 | 0.481479 | 0.730878 |
| 10448 | 10520250 | <a href="#">NM_016736</a>          | <a href="#">53312</a>     | negative regulator of ubiquiti | <a href="#">Nub1</a>          | 0.98 | -0.645 | 0.539107 | 0.772047 |
| 10449 | 10518686 | <a href="#">NM_008840</a>          | <a href="#">18707</a>     | phosphatidylinositol 3-kinase  | <a href="#">Pik3cd</a>        | 0.98 | -0.306 | 0.768025 | 0.903579 |
| 10450 | 10512682 | <a href="#">NM_173399</a>          | <a href="#">230119</a>    | zinc finger and BTB domain con | <a href="#">Zbtb5</a>         | 0.98 | -0.496 | 0.634799 | 0.833935 |
| 10451 | 10552110 | <a href="#">XM_001481136</a>       | <a href="#">435962</a>    | similar to hCG16001            | <a href="#">LOC435962</a>     | 0.98 | 0.199  | 0.848132 | 0.938472 |
| 10452 | 10533403 | <a href="#">NM_007804</a>          | <a href="#">13048</a>     | cut-like homeobox 2            | <a href="#">Cux2</a>          | 0.98 | -0.441 | 0.672466 | 0.854651 |
| 10453 | 10534873 | <a href="#">ENSMUST00000031732</a> | <a href="#">71176</a>     | F-box protein 24               | <a href="#">Fbxo24</a>        | 0.98 | -0.299 | 0.77345  | 0.9067   |
| 10454 | 10485277 |                                    |                           |                                |                               | 0.98 | -0.154 | 0.881551 | 0.953086 |
| 10455 | 10431546 | <a href="#">NM_138302</a>          | <a href="#">72962</a>     | thymidine phosphorylase        | <a href="#">Tymp</a>          | 0.98 | -0.666 | 0.525906 | 0.76194  |
| 10456 | 10447042 | <a href="#">NM_028611</a>          | <a href="#">73694</a>     | RIKEN cDNA 2410091C18 gene     | <a href="#">2410091C18Rik</a> | 0.98 | -0.176 | 0.865046 | 0.946153 |
| 10457 | 10365297 | <a href="#">BC094241</a>           | <a href="#">28109</a>     | DNA segment, Chr 10, Wayne Sta | <a href="#">D10Wsu102e</a>    | 0.98 | -0.807 | 0.445364 | 0.703573 |
| 10458 | 10421758 | <a href="#">AK129178</a>           | <a href="#">219181</a>    | A kinase (PRKA) anchor protein | <a href="#">Akap11</a>        | 0.98 | -0.437 | 0.675071 | 0.855635 |
| 10459 | 10598020 |                                    |                           |                                |                               | 0.98 | -0.516 | 0.621079 | 0.826022 |
| 10460 | 10552888 | <a href="#">XM_914689</a>          | <a href="#">381884</a>    | solute carrier family 6, membe | <a href="#">Slc6a16</a>       | 0.98 | -0.171 | 0.868802 | 0.947491 |
| 10461 | 10464415 | <a href="#">BC013514</a>           | <a href="#">67894</a>     | RIKEN cDNA 1810055E12 gene     | <a href="#">1810055E12Rik</a> | 0.98 | -0.439 | 0.673631 | 0.855069 |
| 10462 | 10348590 | <a href="#">NM_173395</a>          | <a href="#">227358</a>    | cDNA sequence BC056923         | <a href="#">BC056923</a>      | 0.98 | -0.237 | 0.818922 | 0.928035 |
| 10463 | 10426110 | <a href="#">NM_145478</a>          | <a href="#">223775</a>    | proviral integration site 3    | <a href="#">Pim3</a>          | 0.98 | -0.442 | 0.671769 | 0.854369 |
| 10464 | 10555777 |                                    |                           |                                |                               | 0.98 | 0.006  | 0.995337 | 0.99817  |
| 10465 | 10372204 |                                    |                           |                                |                               | 0.98 | -0.177 | 0.864568 | 0.946153 |
| 10466 | 10453114 | <a href="#">NM_198942</a>          | <a href="#">106794</a>    | DEAH (Asp-Glu-Ala-Asp/His) box | <a href="#">Dhx57</a>         | 0.98 | -0.319 | 0.758526 | 0.898805 |
| 10467 | 10527573 |                                    |                           |                                |                               | 0.98 | -0.194 | 0.851732 | 0.940193 |
| 10468 | 10531581 |                                    |                           |                                |                               | 0.98 | -0.161 | 0.876484 | 0.951096 |
| 10469 | 10521705 | <a href="#">ENSMUST00000053250</a> | <a href="#">624224</a>    | clarin 2                       | <a href="#">Clrn2</a>         | 0.98 | -0.493 | 0.636569 | 0.834887 |
| 10470 | 10396867 | <a href="#">NM_133798</a>          | <a href="#">97827</a>     | exonuclease 3"-5" domain-lik   | <a href="#">Exdl2</a>         | 0.98 | -0.44  | 0.672936 | 0.854651 |
| 10471 | 10591715 | <a href="#">NM_177318</a>          | <a href="#">319601</a>    | zinc finger protein 653        | <a href="#">Zfp653</a>        | 0.98 | -0.047 | 0.963619 | 0.985728 |
| 10472 | 10595202 |                                    |                           |                                |                               | 0.98 | 0.07   | 0.945868 | 0.978614 |
| 10473 | 10510399 | <a href="#">NM_001003893</a>       | <a href="#">17175</a>     | mannan-binding lectin serine p | <a href="#">Masp2</a>         | 0.98 | -0.117 | 0.909818 | 0.964056 |
| 10474 | 10478374 | <a href="#">NM_144891</a>          | <a href="#">228858</a>    | ganglioside-induced differenti | <a href="#">Gdap11l</a>       | 0.98 | -0.44  | 0.67288  | 0.854651 |
| 10475 | 10469943 | <a href="#">BC061039</a>           | <a href="#">68222</a>     | cDNA sequence BC061039         | <a href="#">BC061039</a>      | 0.98 | -0.045 | 0.965436 | 0.986124 |
| 10476 | 10545692 |                                    |                           |                                |                               | 0.98 | -0.49  | 0.638961 | 0.835923 |
| 10477 | 10410287 | <a href="#">NM_001001152</a>       | <a href="#">238690</a>    | zinc finger protein 458        | <a href="#">Zfp458</a>        | 0.98 | -0.56  | 0.592279 | 0.807145 |
| 10478 | 10480842 | <a href="#">NM_001109993</a>       | <a href="#">51875</a>     | transmembrane protein 141      | <a href="#">Tmem141</a>       | 0.98 | -0.539 | 0.606172 | 0.816415 |
| 10479 | 10437680 | <a href="#">NM_008933</a>          | <a href="#">19119</a>     | protamine 2                    | <a href="#">Prm2</a>          | 0.98 | -0.619 | 0.555116 | 0.783898 |
| 10480 | 10434211 | <a href="#">NM_023120</a>          | <a href="#">13972</a>     | guanine nucleotide binding pro | <a href="#">Gnb1l</a>         | 0.98 | -0.345 | 0.740168 | 0.889339 |

|       |          |                                    |                           |                                |                                    |       |        |          |          |
|-------|----------|------------------------------------|---------------------------|--------------------------------|------------------------------------|-------|--------|----------|----------|
| 10481 | 10535467 |                                    |                           |                                |                                    | 0.98  | -0.038 | 0.970517 | 0.988088 |
| 10482 | 10444306 | <a href="#">NM_001033978</a>       | <a href="#">381091</a>    | histocompatibility 2, class II | <a href="#">H2-Eb2</a>             | 0.98  | -0.321 | 0.757457 | 0.898154 |
| 10483 | 10370413 | <a href="#">NM_138601</a>          | <a href="#">28295</a>     | DNA segment, Chr 10, Johns Hop | <a href="#">D10Jhu81e</a>          | 0.98  | -0.55  | 0.599062 | 0.811784 |
| 10484 | 10479483 | <a href="#">ENSMUST00000108875</a> | <a href="#">329581</a>    | baculoviral IAP repeat-contain | <a href="#">Birc7</a>              | 0.98  | -0.172 | 0.867837 | 0.947073 |
| 10485 | 10459823 | <a href="#">NM_001039252</a>       | <a href="#">639653</a>    | predicted gene, EG639653       | <a href="#">EG639653</a>           | 0.98  | -0.438 | 0.674458 | 0.855422 |
| 10486 | 10463751 | <a href="#">NM_011053</a>          | <a href="#">18572</a>     | programmed cell death protein  | <a href="#">Pdcd11</a>             | 0.98  | -0.571 | 0.585194 | 0.802735 |
| 10487 | 10606252 |                                    |                           |                                |                                    | 0.98  | -0.494 | 0.636196 | 0.834785 |
| 10488 | 10568810 | <a href="#">BC116882</a>           | <a href="#">212124</a>    | RIKEN cDNA E030019B06 gene     | <a href="#">E030019B06Rik</a>      | 0.98  | 0.054  | 0.958623 | 0.984334 |
| 10489 | 10400413 | <a href="#">NM_001112714</a>       | <a href="#">56784</a>     | GTPase activating RANGAP domai | <a href="#">Garn1</a>              | 0.98  | -0.541 | 0.604711 | 0.815591 |
| 10490 | 10526754 | <a href="#">NM_021392</a>          | <a href="#">11781</a>     | adaptor-related protein comple | <a href="#">Ap4m1</a>              | 0.98  | -0.301 | 0.772149 | 0.906083 |
| 10491 | 10352792 | <a href="#">XR_033810</a>          | <a href="#">100042611</a> | similar to Cks1 protein homolo | <a href="#">LOC100042611</a>       | 0.98  | -0.228 | 0.825671 | 0.929887 |
| 10492 | 10454514 | <a href="#">NM_144862</a>          | <a href="#">225341</a>    | LIM and senescent cell antigen | <a href="#">Lims2</a>              | 0.98  | 0.091  | 0.929675 | 0.972207 |
| 10493 | 10444761 | <a href="#">NM_019693</a>          | <a href="#">53817</a>     | HLA-B-associated transcript 1A | <a href="#">Bat1a</a>              | 0.979 | -0.682 | 0.516581 | 0.755888 |
| 10494 | 10408828 | <a href="#">NM_008104</a>          | <a href="#">107889</a>    | glial cells missing homolog 2  | <a href="#">Gcm2</a>               | 0.979 | -0.224 | 0.829258 | 0.93131  |
| 10495 | 10567022 | <a href="#">NM_133700</a>          | <a href="#">68815</a>     | BTB (POZ) domain containing 10 | <a href="#">Btbd10</a>             | 0.979 | -0.4   | 0.700429 | 0.86896  |
| 10496 | 10550650 | <a href="#">NM_007948</a>          | <a href="#">13870</a>     | excision repair cross-compleme | <a href="#">Ercc1</a>              | 0.979 | -0.684 | 0.515091 | 0.754817 |
| 10497 | 10388896 |                                    |                           |                                |                                    | 0.979 | -0.425 | 0.683458 | 0.859874 |
| 10498 | 10479402 | <a href="#">NM_028479</a>          | <a href="#">73247</a>     | RIKEN cDNA 1600027N09 gene     | <a href="#">1600027N09Rik</a>      | 0.979 | -0.346 | 0.739008 | 0.888726 |
| 10499 | 10539444 | <a href="#">NM_011912</a>          | <a href="#">24113</a>     | ventral anterior homeobox cont | <a href="#">Vax2</a>               | 0.979 | -0.225 | 0.828576 | 0.931115 |
| 10500 | 10490931 | <a href="#">NM_172677</a>          | <a href="#">229096</a>    | YTH domain family 3            | <a href="#">Ythdf3</a>             | 0.979 | -0.478 | 0.646562 | 0.840625 |
| 10501 | 10568233 | <a href="#">BC031466</a>           | <a href="#">78921</a>     | RIKEN cDNA 9130019O22 gene     | <a href="#">9130019O22Rik</a>      | 0.979 | -1.657 | 0.140256 | 0.378815 |
| 10502 | 10394346 |                                    |                           |                                |                                    | 0.979 | -0.517 | 0.620626 | 0.825679 |
| 10503 | 10596267 |                                    |                           |                                |                                    | 0.979 | -0.259 | 0.802641 | 0.919965 |
| 10504 | 10372877 | <a href="#">NM_001081056</a>       | <a href="#">73192</a>     | exportin, tRNA (nuclear export | <a href="#">Xpot</a>               | 0.979 | -0.712 | 0.498924 | 0.742429 |
| 10505 | 10535418 | <a href="#">NM_021326</a>          | <a href="#">57782</a>     | RB-associated KRAB repressor   | <a href="#">Rbak</a>               | 0.979 | -0.389 | 0.708431 | 0.872343 |
| 10506 | 10508178 | <a href="#">ENSMUST00000097886</a> | <a href="#">230757</a>    | RIKEN cDNA 5730409E04Rik gene  | <a href="#">5730409E04Rik</a>      | 0.979 | 0.156  | 0.880306 | 0.952471 |
| 10507 | 10467962 | <a href="#">NM_181422</a>          | <a href="#">329064</a>    | polycystic kidney disease 2-li | <a href="#">Pkd21l</a>             | 0.979 | 0.351  | 0.735864 | 0.886874 |
| 10508 | 10384930 | <a href="#">NM_001100394</a>       | <a href="#">75087</a>     | RIKEN cDNA 4930505A04 gene     | <a href="#">4930505A04Rik</a>      | 0.979 | 0.032  | 0.975718 | 0.989951 |
| 10509 | 10397216 | <a href="#">NM_172582</a>          | <a href="#">217707</a>    | coenzyme Q6 homolog (yeast)    | <a href="#">Coq6</a>               | 0.979 | -0.741 | 0.482007 | 0.730954 |
| 10510 | 10566091 | <a href="#">NM_001081424</a>       | <a href="#">504186</a>    | cholinergic receptor, nicotini | <a href="#">Chrna10</a>            | 0.979 | 0.117  | 0.90985  | 0.964056 |
| 10511 | 10370584 | <a href="#">BC089008</a>           | <a href="#">237397</a>    | RIKEN cDNA 4932409I22 gene     | <a href="#">4932409I22Rik</a>      | 0.979 | 0.036  | 0.971917 | 0.988148 |
| 10512 | 10426798 | <a href="#">NM_031842</a>          | <a href="#">83797</a>     | SWI/SNF related, matrix associ | <a href="#">Smardc1</a>            | 0.979 | -0.723 | 0.492194 | 0.738375 |
| 10513 | 10548701 | <a href="#">NM_008514</a>          | <a href="#">16974</a>     | low density lipoprotein recept | <a href="#">Lrp6</a>               | 0.979 | -0.456 | 0.662074 | 0.849499 |
| 10514 | 10362201 | <a href="#">NM_010217</a>          | <a href="#">14219</a>     | connective tissue growth facto | <a href="#">Ctgf</a>               | 0.979 | -0.339 | 0.744425 | 0.891438 |
| 10515 | 10383684 | <a href="#">NM_010718</a>          | <a href="#">16886</a>     | LIM motif-containing protein k | <a href="#">Limk2</a>              | 0.979 | -0.464 | 0.656298 | 0.846043 |
| 10516 | 10562754 |                                    |                           |                                |                                    | 0.979 | 0.151  | 0.884167 | 0.954451 |
| 10517 | 10442857 | <a href="#">NM_026238</a>          | <a href="#">67563</a>     | nuclear prelamin A recognition | <a href="#">Narfl</a>              | 0.979 | -0.387 | 0.709782 | 0.872992 |
| 10518 | 10437885 | <a href="#">NM_013607</a>          | <a href="#">17880</a>     | myosin, heavy polypeptide 11,  | <a href="#">Myh11</a>              | 0.979 | 0.12   | 0.907965 | 0.963723 |
| 10519 | 10433494 | <a href="#">NM_011955</a>          | <a href="#">26425</a>     | nucleotide binding protein 1   | <a href="#">Nubp1</a>              | 0.979 | -0.331 | 0.749727 | 0.894292 |
| 10520 | 10443378 | <a href="#">NM_001034871</a>       | <a href="#">328788</a>    | gene model 749, (NCBI)         | <a href="#">Gm749</a>              | 0.979 | 0.027  | 0.979036 | 0.991699 |
| 10521 | 10598029 | <a href="#">ENSMUST00000082392</a> | <a href="#">17716</a>     | NADH dehydrogenase subunit 1   | <a href="#">ND1</a>                | 0.979 | -0.553 | 0.597132 | 0.810309 |
| 10522 | 10415127 | <a href="#">NM_080729</a>          | <a href="#">140806</a>    | interleukin 25                 | <a href="#">Il25</a>               | 0.979 | -0.137 | 0.894709 | 0.958505 |
| 10523 | 10412082 | <a href="#">NM_028487</a>          | <a href="#">73274</a>     | GC-rich promoter binding prote | <a href="#">Gpbpl</a>              | 0.979 | -0.705 | 0.503192 | 0.745637 |
| 10524 | 10360542 |                                    |                           |                                |                                    | 0.979 | -0.306 | 0.768009 | 0.903579 |
| 10525 | 10576951 | <a href="#">ENSMUST00000098943</a> | <a href="#">100038550</a> | predicted gene, ENSMUSG0000007 | <a href="#">ENSMUSG00000074477</a> | 0.979 | 0.117  | 0.91016  | 0.964056 |
| 10526 | 10363486 | <a href="#">NM_153542</a>          | <a href="#">216011</a>    | leucine rich repeat containing | <a href="#">Lrrc20</a>             | 0.979 | -0.088 | 0.931917 | 0.97291  |
| 10527 | 10516884 | <a href="#">NM_027925</a>          | <a href="#">71787</a>     | tRNA selenocysteine associated | <a href="#">Trspap1</a>            | 0.979 | -1.03  | 0.336228 | 0.611869 |
| 10528 | 10476347 | <a href="#">ENSMUST00000099333</a> | <a href="#">767814</a>    | expressed sequence AU019990    | <a href="#">AU019990</a>           | 0.979 | 0.074  | 0.943001 | 0.977825 |
| 10529 | 10427035 | <a href="#">NM_010444</a>          | <a href="#">15370</a>     | nuclear receptor subfamily 4,  | <a href="#">Nr4a1</a>              | 0.979 | -0.046 | 0.964695 | 0.985959 |
| 10530 | 10465303 | <a href="#">NM_198650</a>          | <a href="#">381203</a>    | solute carrier family 22 (orga | <a href="#">Slc22a20</a>           | 0.979 | -0.432 | 0.678053 | 0.856948 |

|       |          |                                    |                           |                                               |                                    |       |        |          |          |
|-------|----------|------------------------------------|---------------------------|-----------------------------------------------|------------------------------------|-------|--------|----------|----------|
| 10531 | 10501051 | <a href="#">NM_133869</a>          | <a href="#">99712</a>     | choline/ethanolaminephosphotra                | <a href="#">Cept1</a>              | 0.979 | -0.399 | 0.701658 | 0.869143 |
| 10532 | 10451465 | <a href="#">NM_011195</a>          | <a href="#">19208</a>     | pre T-cell antigen receptor al                | <a href="#">Ptcra</a>              | 0.979 | -0.122 | 0.906013 | 0.963405 |
| 10533 | 10433575 | <a href="#">ENSMUST00000100182</a> | <a href="#">100038543</a> | predicted gene,                               | <a href="#">ENSMUSG00000075403</a> | 0.979 | -0.585 | 0.576479 | 0.797453 |
| 10534 | 10574342 | <a href="#">BC016418</a>           | <a href="#">101985</a>    | ENSMUSG0000007<br>expressed sequence AA960436 | <a href="#">AA960436</a>           | 0.979 | -0.924 | 0.385426 | 0.654626 |
| 10535 | 10368484 | <a href="#">ENSMUST00000070359</a> | <a href="#">791368</a>    | predicted gene,<br>ENSMUSG0000005             | <a href="#">ENSMUSG00000056316</a> | 0.979 | -0.125 | 0.903948 | 0.962757 |
| 10536 | 10500429 | <a href="#">NM_008123</a>          | <a href="#">14616</a>     | gap junction protein, alpha 8                 | <a href="#">Gja8</a>               | 0.979 | -0.375 | 0.718297 | 0.876988 |
| 10537 | 10353574 | <a href="#">NM_007733</a>          | <a href="#">12823</a>     | collagen, type XIX, alpha 1                   | <a href="#">Col19a1</a>            | 0.979 | -0.079 | 0.93887  | 0.976218 |
| 10538 | 10568328 | <a href="#">NM_178600</a>          | <a href="#">27973</a>     | vitamin K epoxide reductase co                | <a href="#">Vkorc1</a>             | 0.979 | -0.656 | 0.532108 | 0.766201 |
| 10539 | 10398082 | <a href="#">ENSMUST00000021520</a> | <a href="#">73928</a>     | RIKEN cDNA 4930408O17<br>gene                 | <a href="#">4930408O17Rik</a>      | 0.979 | 0.054  | 0.958256 | 0.984334 |
| 10540 | 10518679 | <a href="#">NM_133435</a>          | <a href="#">66454</a>     | nicotinamide nucleotide adenylyl              | <a href="#">Nmnat1</a>             | 0.979 | -0.429 | 0.680645 | 0.85838  |
| 10541 | 10358177 | <a href="#">BC053100</a>           | <a href="#">67313</a>     | RIKEN cDNA 5730559C18<br>gene                 | <a href="#">5730559C18Rik</a>      | 0.979 | -0.131 | 0.899596 | 0.960245 |
| 10542 | 10374466 | <a href="#">NM_008996</a>          | <a href="#">19324</a>     | RAB1, member RAS oncogene<br>fami             | <a href="#">Rab1</a>               | 0.979 | -0.683 | 0.516117 | 0.755582 |
| 10543 | 10568586 | <a href="#">NM_175268</a>          | <a href="#">77938</a>     | RIKEN cDNA A930008G19<br>gene                 | <a href="#">A930008G19Rik</a>      | 0.979 | -1.065 | 0.321292 | 0.598079 |
| 10544 | 10524640 | <a href="#">BC031162</a>           | <a href="#">72357</a>     | RIKEN cDNA 2210016L21 gene                    | <a href="#">2210016L21Rik</a>      | 0.979 | -0.572 | 0.584596 | 0.802272 |
| 10545 | 10599648 |                                    |                           |                                               |                                    | 0.979 | 0.156  | 0.880414 | 0.952526 |
| 10546 | 10513195 | <a href="#">NM_011660</a>          | <a href="#">22166</a>     | thioredoxin 1                                 | <a href="#">Txn1</a>               | 0.979 | -0.433 | 0.677972 | 0.856898 |
| 10547 | 10530380 | <a href="#">NM_001038015</a>       | <a href="#">67980</a>     | glucosamine-6-phosphate<br>deamin             | <a href="#">Gnpda2</a>             | 0.979 | -0.601 | 0.566059 | 0.792149 |
| 10548 | 10362899 | <a href="#">ENSMUST00000099888</a> | <a href="#">414125</a>    | RIKEN cDNA F830002L21<br>gene                 | <a href="#">F830002L21Rik</a>      | 0.979 | 0.015  | 0.988714 | 0.995308 |
| 10549 | 10453047 | <a href="#">XR_034816</a>          | <a href="#">668812</a>    | similar to ribosomal protein                  | <a href="#">LOC668812</a>          | 0.979 | -0.236 | 0.820107 | 0.928345 |
| 10550 | 10512265 | <a href="#">NM_027993</a>          | <a href="#">71901</a>     | RIKEN cDNA 2310028H24<br>gene                 | <a href="#">2310028H24Rik</a>      | 0.979 | -0.283 | 0.785351 | 0.912507 |
| 10551 | 10542724 | <a href="#">NR_003625</a>          | <a href="#">381827</a>    | RIKEN cDNA 1700073E17 gene                    | <a href="#">1700073E17Rik</a>      | 0.979 | -0.45  | 0.666193 | 0.851266 |
| 10552 | 10533462 | <a href="#">NM_144912</a>          | <a href="#">231724</a>    | RAD9 homolog B (S. cerevisiae)                | <a href="#">Rad9b</a>              | 0.979 | -0.497 | 0.633842 | 0.833492 |
| 10553 | 10581299 | <a href="#">NM_007427</a>          | <a href="#">11604</a>     | agouti related protein                        | <a href="#">Agrp</a>               | 0.979 | -0.102 | 0.921597 | 0.968694 |
| 10554 | 10476252 | <a href="#">NM_023117</a>          | <a href="#">12531</a>     | cell division cycle 25 homolog                | <a href="#">Cdc25b</a>             | 0.979 | -0.075 | 0.942318 | 0.977825 |
| 10555 | 10393045 | <a href="#">AK140207</a>           | <a href="#">100038636</a> | predicted gene,<br>ENSMUSG0000007             | <a href="#">ENSMUSG00000075418</a> | 0.979 | 0.184  | 0.858877 | 0.943374 |
| 10556 | 10374706 | <a href="#">NM_028304</a>          | <a href="#">74467</a>     | pseudouridylyl synthase 10                    | <a href="#">Pus10</a>              | 0.979 | -1.151 | 0.286532 | 0.562214 |
| 10557 | 10360443 | <a href="#">NM_010209</a>          | <a href="#">14194</a>     | fumarate hydratase 1                          | <a href="#">Fh1</a>                | 0.979 | -0.743 | 0.480807 | 0.730487 |
| 10558 | 10472994 | <a href="#">NM_016804</a>          | <a href="#">53375</a>     | metaxin 2                                     | <a href="#">Mtx2</a>               | 0.979 | -0.594 | 0.570957 | 0.795189 |
| 10559 | 10573713 | <a href="#">NM_172757</a>          | <a href="#">234549</a>    | HEAT repeat containing 3                      | <a href="#">Heatr3</a>             | 0.979 | -0.657 | 0.531277 | 0.765579 |
| 10560 | 10446013 | <a href="#">NM_026530</a>          | <a href="#">68047</a>     | MPN domain containing                         | <a href="#">Mpn2</a>               | 0.979 | -1.082 | 0.314141 | 0.590943 |
| 10561 | 10560505 |                                    |                           |                                               |                                    | 0.979 | -0.292 | 0.77886  | 0.910097 |
| 10562 | 10477600 |                                    |                           |                                               |                                    | 0.979 | -0.072 | 0.944732 | 0.978132 |
| 10563 | 10454469 | <a href="#">NM_153515</a>          | <a href="#">225339</a>    | AMME chromosomal region<br>gene 1             | <a href="#">Ammecr11</a>           | 0.979 | -0.94  | 0.377649 | 0.647469 |
| 10564 | 10390407 | <a href="#">NM_001081220</a>       | <a href="#">217143</a>    | G protein-coupled receptor 179                | <a href="#">Gpr179</a>             | 0.979 | -0.116 | 0.910491 | 0.964214 |
| 10565 | 10503902 | <a href="#">NM_007726</a>          | <a href="#">12801</a>     | cannabinoid receptor 1 (brain)                | <a href="#">Cnr1</a>               | 0.979 | -0.248 | 0.810901 | 0.923749 |
| 10566 | 10592701 | <a href="#">NM_001034863</a>       | <a href="#">235300</a>    | transmembrane protein 136                     | <a href="#">Tmem136</a>            | 0.978 | -0.9   | 0.39715  | 0.664239 |
| 10567 | 10551423 | <a href="#">BC024577</a>           | <a href="#">71163</a>     | RIKEN cDNA 4933426I21 gene                    | <a href="#">4933426I21Rik</a>      | 0.978 | -0.594 | 0.570968 | 0.795189 |
| 10568 | 10527880 | <a href="#">BC029549</a>           | <a href="#">269623</a>    | RIKEN cDNA C030048B08<br>gene                 | <a href="#">C030048B08Rik</a>      | 0.978 | -0.385 | 0.711423 | 0.873563 |
| 10569 | 10425655 | <a href="#">AY270177</a>           | <a href="#">74369</a>     | meiosis defective 1                           | <a href="#">Mei1</a>               | 0.978 | -0.207 | 0.841768 | 0.936059 |
| 10570 | 10391348 | <a href="#">BC016089</a>           | <a href="#">67998</a>     | RIKEN cDNA 1300010M03<br>gene                 | <a href="#">1300010M03Rik</a>      | 0.978 | -0.44  | 0.672793 | 0.854651 |
| 10571 | 10539822 | <a href="#">NM_017477</a>          | <a href="#">54161</a>     | coatomer protein complex, subu                | <a href="#">Coptg</a>              | 0.978 | -0.469 | 0.652588 | 0.844451 |
| 10572 | 10529052 | <a href="#">NM_177870</a>          | <a href="#">330064</a>    | solute carrier family 5 (sodi                 | <a href="#">Slc5a6</a>             | 0.978 | -0.431 | 0.679267 | 0.857678 |
| 10573 | 10381260 | <a href="#">NM_134028</a>          | <a href="#">103768</a>    | tubulin, gamma 2                              | <a href="#">Tubg2</a>              | 0.978 | 0.036  | 0.972317 | 0.98815  |
| 10574 | 10579772 |                                    |                           |                                               |                                    | 0.978 | -0.207 | 0.841886 | 0.936059 |
| 10575 | 10552689 | <a href="#">BC049752</a>           | <a href="#">75538</a>     | RIKEN cDNA 1700021P22 gene                    | <a href="#">1700021P22Rik</a>      | 0.978 | -0.208 | 0.84105  | 0.935759 |
| 10576 | 10602105 | <a href="#">NM_007736</a>          | <a href="#">12830</a>     | collagen, type IV, alpha 5                    | <a href="#">Col4a5</a>             | 0.978 | -0.384 | 0.711816 | 0.873734 |

|       |          |                                    |                        |                                 |                                    |       |        |          |          |
|-------|----------|------------------------------------|------------------------|---------------------------------|------------------------------------|-------|--------|----------|----------|
| 10577 | 10458386 | <a href="#">NM_010885</a>          | <a href="#">17991</a>  | NADH dehydrogenase (ubiquinone) | <a href="#">Ndufa2</a>             | 0.978 | -1.172 | 0.278362 | 0.553374 |
| 10578 | 10423745 | <a href="#">NM_012031</a>          | <a href="#">26942</a>  | sperm associated antigen 1      | <a href="#">Spag1</a>              | 0.978 | -0.371 | 0.720998 | 0.878601 |
| 10579 | 10439084 | <a href="#">ENSMUST00000099984</a> | <a href="#">675921</a> | predicted gene, ENSMUSG0000007  | <a href="#">ENSMUSG00000075265</a> | 0.978 | -0.122 | 0.906517 | 0.963405 |
| 10580 | 10438726 | <a href="#">XR_032916</a>          | <a href="#">625969</a> | predicted gene, EG625969        | <a href="#">EG625969</a>           | 0.978 | -0.533 | 0.609745 | 0.818413 |
| 10581 | 10404356 | <a href="#">XM_909282</a>          | <a href="#">626683</a> | similar to ribosomal protein L  | <a href="#">LOC626683</a>          | 0.978 | -0.175 | 0.865905 | 0.94648  |
| 10582 | 10597377 | <a href="#">NM_178624</a>          | <a href="#">72179</a>  | F-box and leucine-rich repeat   | <a href="#">Fbx12</a>              | 0.978 | -0.427 | 0.681691 | 0.859336 |
| 10583 | 10364990 | <a href="#">NM_007907</a>          | <a href="#">13629</a>  | eukaryotic translation elongat  | <a href="#">Eef2</a>               | 0.978 | -0.872 | 0.411372 | 0.675346 |
| 10584 | 10380210 | <a href="#">NM_173374</a>          | <a href="#">110809</a> | splicing factor, arginine/seri  | <a href="#">Sfrs1</a>              | 0.978 | -0.866 | 0.414259 | 0.677477 |
| 10585 | 10477970 | <a href="#">NM_009271</a>          | <a href="#">20779</a>  | Rous sarcoma oncogene           | <a href="#">Src</a>                | 0.978 | -0.619 | 0.554762 | 0.783816 |
| 10586 | 10479807 | <a href="#">XR_031780</a>          | <a href="#">666973</a> | similar to Protein regulator o  | <a href="#">LOC666973</a>          | 0.978 | -0.307 | 0.767748 | 0.903505 |
| 10587 | 10571329 | <a href="#">XM_146277</a>          | <a href="#">244417</a> | gene model 501, (NCBI)          | <a href="#">Gm501</a>              | 0.978 | -0.074 | 0.943356 | 0.977948 |
| 10588 | 10435288 | <a href="#">NM_010739</a>          | <a href="#">17063</a>  | mucin 13, epithelial transmemb  | <a href="#">Muc13</a>              | 0.978 | -0.318 | 0.759158 | 0.89915  |
| 10589 | 10506335 | <a href="#">NM_019840</a>          | <a href="#">18578</a>  | phosphodiesterase 4B, cAMP spe  | <a href="#">Pde4b</a>              | 0.978 | -0.548 | 0.59993  | 0.812084 |
| 10590 | 10541803 | <a href="#">NM_145979</a>          | <a href="#">107932</a> | chromodomain helicase DNA bind  | <a href="#">Chd4</a>               | 0.978 | -0.729 | 0.489114 | 0.736349 |
| 10591 | 10537437 | <a href="#">AB106871</a>           | <a href="#">621427</a> | predicted gene, ENSMUSG0000006  | <a href="#">ENSMUSG00000068601</a> | 0.978 | -0.16  | 0.876942 | 0.951412 |
| 10592 | 10559200 | <a href="#">NM_009405</a>          | <a href="#">21953</a>  | troponin I, skeletal, fast 2    | <a href="#">Tnni2</a>              | 0.978 | 0.049  | 0.962542 | 0.985405 |
| 10593 | 10516419 | <a href="#">NM_198960</a>          | <a href="#">332937</a> | transcription factor AP-2, eps  | <a href="#">Tcfap2e</a>            | 0.978 | -0.39  | 0.707642 | 0.872268 |
| 10594 | 10574492 | <a href="#">ENSMUST00000067136</a> | <a href="#">21893</a>  | T lymphoma oncogene             | <a href="#">Tlm</a>                | 0.978 | -0.136 | 0.895723 | 0.959042 |
| 10595 | 10424772 | <a href="#">ENSMUST00000100531</a> | <a href="#">432964</a> | RIKEN cDNA K230010J24 gene      | <a href="#">K230010J24Rik</a>      | 0.978 | -0.096 | 0.926076 | 0.970758 |
| 10596 | 10460658 | <a href="#">NM_010669</a>          | <a href="#">16530</a>  | potassium channel, subfamily K  | <a href="#">Kcnk7</a>              | 0.978 | 0.007  | 0.994355 | 0.997703 |
| 10597 | 10583942 | <a href="#">NM_144543</a>          | <a href="#">77862</a>  | thymocyte nuclear protein 1     | <a href="#">Thyn1</a>              | 0.978 | -0.86  | 0.417215 | 0.680154 |
| 10598 | 10420320 | <a href="#">NM_001014996</a>       | <a href="#">219103</a> | centromere protein J            | <a href="#">Cenpj</a>              | 0.978 | -0.599 | 0.567197 | 0.792635 |
| 10599 | 10577866 | <a href="#">NM_011791</a>          | <a href="#">23808</a>  | ash2 (absent, small, or homeot  | <a href="#">Ash2l</a>              | 0.978 | -0.612 | 0.559383 | 0.786775 |
| 10600 | 10460621 | <a href="#">ENSMUST00000058632</a> | <a href="#">76513</a>  | RIKEN cDNA 1810058N15 gene      | <a href="#">1810058N15Rik</a>      | 0.978 | -0.269 | 0.795633 | 0.916955 |
| 10601 | 10499847 | <a href="#">BC120651</a>           | <a href="#">66511</a>  | RIKEN cDNA 2500003M10 gene      | <a href="#">2500003M10Rik</a>      | 0.978 | -0.717 | 0.495728 | 0.740536 |
| 10602 | 10444883 | <a href="#">NM_001008424</a>       | <a href="#">386463</a> | corneodesmosin                  | <a href="#">Cdsn</a>               | 0.978 | -0.327 | 0.75263  | 0.895764 |
| 10603 | 10579987 | <a href="#">NM_001039137</a>       | <a href="#">56367</a>  | short coiled-coil protein       | <a href="#">Scoc</a>               | 0.978 | 0.38   | 0.714736 | 0.875137 |
| 10604 | 10362479 | <a href="#">BC099502</a>           | <a href="#">692132</a> | BET3 like (S. cerevisiae)       | <a href="#">Bet3l</a>              | 0.978 | -0.025 | 0.980726 | 0.991919 |
| 10605 | 10379891 | <a href="#">NM_016910</a>          | <a href="#">53892</a>  | protein phosphatase 1D magnesi  | <a href="#">Ppm1d</a>              | 0.978 | -0.714 | 0.497624 | 0.741949 |
| 10606 | 10515162 | <a href="#">NM_015758</a>          | <a href="#">30923</a>  | forkhead box E3                 | <a href="#">Foxe3</a>              | 0.978 | -0.487 | 0.640761 | 0.837345 |
| 10607 | 10424105 | <a href="#">NM_173422</a>          | <a href="#">239447</a> | collectin sub-family member 10  | <a href="#">Colec10</a>            | 0.978 | -0.469 | 0.653077 | 0.844553 |
| 10608 | 10500736 | <a href="#">NM_177545</a>          | <a href="#">229658</a> | vang-like 1 (van gogh, Drosoph  | <a href="#">Vangl1</a>             | 0.978 | -0.727 | 0.490287 | 0.737262 |
| 10609 | 10440794 | <a href="#">NM_025642</a>          | <a href="#">66578</a>  | RIKEN cDNA 2610039C10 gene      | <a href="#">2610039C10Rik</a>      | 0.978 | -0.555 | 0.595748 | 0.809631 |
| 10610 | 10413733 | <a href="#">NM_001025379</a>       | <a href="#">218877</a> | sema domain, immunoglobulin do  | <a href="#">Sema3g</a>             | 0.978 | -0.173 | 0.867191 | 0.946934 |
| 10611 | 10551953 | <a href="#">BC065044</a>           | <a href="#">381868</a> | gene model 1082, (NCBI)         | <a href="#">Gm1082</a>             | 0.978 | 0.118  | 0.909066 | 0.963765 |
| 10612 | 10464110 | <a href="#">ENSMUST00000099314</a> | <a href="#">269094</a> | RIKEN cDNA D730002M21 gene      | <a href="#">D730002M21Rik</a>      | 0.978 | 0.093  | 0.928073 | 0.971746 |
| 10613 | 10412064 |                                    |                        |                                 |                                    | 0.978 | -0.014 | 0.988965 | 0.995308 |
| 10614 | 10387757 | <a href="#">NM_018740</a>          | <a href="#">54351</a>  | retinoic acid induced 12        | <a href="#">Rai12</a>              | 0.978 | -0.656 | 0.531915 | 0.766132 |
| 10615 | 10466027 | <a href="#">NM_021453</a>          | <a href="#">58803</a>  | pepsinogen 5, group I           | <a href="#">Pga5</a>               | 0.978 | 0.052  | 0.959606 | 0.984851 |
| 10616 | 10409643 | <a href="#">ENSMUST00000007980</a> | <a href="#">77134</a>  | heterogeneous nuclear ribonucl  | <a href="#">Hnrmpa0</a>            | 0.978 | 0.087  | 0.932697 | 0.973153 |
| 10617 | 10432378 | <a href="#">NM_029098</a>          | <a href="#">74775</a>  | limb region 1 like              | <a href="#">Lmbr1l</a>             | 0.978 | -0.256 | 0.804793 | 0.921015 |
| 10618 | 10351781 | <a href="#">NM_001039484</a>       | <a href="#">16513</a>  | potassium inwardly-rectifying   | <a href="#">Kcnj10</a>             | 0.978 | 0.056  | 0.957026 | 0.983559 |
| 10619 | 10465965 | <a href="#">NM_133689</a>          | <a href="#">67752</a>  | RIKEN cDNA 4930579J09 gene      | <a href="#">4930579J09Rik</a>      | 0.978 | 0.111  | 0.914842 | 0.966446 |
| 10620 | 10566597 | <a href="#">NM_146602</a>          | <a href="#">258595</a> | olfactory receptor 698          | <a href="#">Olfr698</a>            | 0.978 | -0.275 | 0.790795 | 0.914692 |
| 10621 | 10366192 |                                    |                        |                                 |                                    | 0.978 | 0.106  | 0.91874  | 0.967805 |
| 10622 | 10585599 | <a href="#">NM_133976</a>          | <a href="#">102462</a> | IMP3, U3 small nucleolar ribon  | <a href="#">Imp3</a>               | 0.978 | -0.392 | 0.706172 | 0.871814 |
| 10623 | 10355567 | <a href="#">NM_027154</a>          | <a href="#">69660</a>  | transmembrane BAX inhibitor mo  | <a href="#">Tmbim1</a>             | 0.978 | -0.388 | 0.709219 | 0.872758 |
| 10624 | 10528523 | <a href="#">NM_025394</a>          | <a href="#">66169</a>  | translocase of outer mitochond  | <a href="#">Tomm7</a>              | 0.978 | -0.684 | 0.515189 | 0.754845 |

|       |          |                                    |                        |                                    |                               |       |        |          |          |
|-------|----------|------------------------------------|------------------------|------------------------------------|-------------------------------|-------|--------|----------|----------|
| 10625 | 10478913 | <a href="#">BC115985</a>           | <a href="#">69372</a>  | molybdenum cofactor synthesis      | <a href="#">Mocs3</a>         | 0.978 | -0.425 | 0.683    | 0.859827 |
| 10626 | 10504650 |                                    |                        |                                    |                               | 0.978 | -0.065 | 0.949649 | 0.980608 |
| 10627 | 10430384 | <a href="#">NM_183141</a>          | <a href="#">207393</a> | leucine rich repeat and fibron     | <a href="#">Elfn2</a>         | 0.978 | 0.05   | 0.96124  | 0.985142 |
| 10628 | 10463789 | <a href="#">NM_021360</a>          | <a href="#">18011</a>  | neuralized-like homolog (Droso     | <a href="#">Neurl</a>         | 0.978 | -0.101 | 0.922286 | 0.969033 |
| 10629 | 10392035 | <a href="#">BC099431</a>           | <a href="#">73431</a>  | RIKEN cDNA 1700052K11<br>gene      | <a href="#">1700052K11Rik</a> | 0.978 | -0.506 | 0.627841 | 0.83073  |
| 10630 | 10558535 | <a href="#">NM_177469</a>          | <a href="#">52389</a>  | G protein-coupled receptor 123     | <a href="#">Gpr123</a>        | 0.978 | -0.144 | 0.889128 | 0.956437 |
| 10631 | 10542414 | <a href="#">NM_011216</a>          | <a href="#">19277</a>  | protein tyrosine phosphatase,      | <a href="#">Ptpro</a>         | 0.978 | -0.915 | 0.389666 | 0.658311 |
| 10632 | 10376557 | <a href="#">NM_134029</a>          | <a href="#">103850</a> | 5',3'-nucleotidase, mitochondr     | <a href="#">Nt5m</a>          | 0.978 | -0.435 | 0.676039 | 0.855911 |
| 10633 | 10370327 |                                    |                        |                                    |                               | 0.978 | 0.023  | 0.982496 | 0.9924   |
| 10634 | 10475845 | <a href="#">NM_028765</a>          | <a href="#">74121</a>  | acyl-Coenzyme A oxidase-like       | <a href="#">Acox1</a>         | 0.978 | -0.422 | 0.685161 | 0.860862 |
| 10635 | 10466040 | <a href="#">NM_007650</a>          | <a href="#">12507</a>  | CD5 antigen                        | <a href="#">Cd5</a>           | 0.977 | -0.267 | 0.797234 | 0.917672 |
| 10636 | 10584819 |                                    |                        |                                    |                               | 0.977 | 0.11   | 0.915638 | 0.966659 |
| 10637 | 10522500 | <a href="#">NM_133256</a>          | <a href="#">14843</a>  | GS homeobox 2                      | <a href="#">Gsx2</a>          | 0.977 | -0.267 | 0.796696 | 0.917464 |
| 10638 | 10541354 | <a href="#">NM_175628</a>          | <a href="#">232345</a> | alpha-2-macroglobulin              | <a href="#">A2m</a>           | 0.977 | -0.271 | 0.793925 | 0.916207 |
| 10639 | 10427162 | <a href="#">BC009140</a>           | <a href="#">106073</a> | DNA Segment, Chr 15, Mouse<br>Gen  | <a href="#">D15Mgi27</a>      | 0.977 | -1.185 | 0.273631 | 0.548314 |
| 10640 | 10488929 | <a href="#">NM_010579</a>          | <a href="#">16418</a>  | eukaryotic translation initiat     | <a href="#">Eif6</a>          | 0.977 | -0.793 | 0.453037 | 0.709661 |
| 10641 | 10579287 | <a href="#">NM_182991</a>          | <a href="#">67937</a>  | transmembrane protein 59-like      | <a href="#">Tmem59l</a>       | 0.977 | -0.127 | 0.902237 | 0.9616   |
| 10642 | 10415784 | <a href="#">NM_023233</a>          | <a href="#">66597</a>  | tripartite motif-containing 13     | <a href="#">Trim13</a>        | 0.977 | -0.469 | 0.652946 | 0.844541 |
| 10643 | 10499963 | <a href="#">NM_148949</a>          | <a href="#">207213</a> | TD and POZ domain containing<br>1  | <a href="#">Tdpoz1</a>        | 0.977 | 0.037  | 0.971309 | 0.988148 |
| 10644 | 10390328 | <a href="#">NM_019507</a>          | <a href="#">57765</a>  | T-box 21                           | <a href="#">Tbx21</a>         | 0.977 | -0.327 | 0.753087 | 0.895971 |
| 10645 | 10439063 | <a href="#">NM_173439</a>          | <a href="#">268882</a> | F-box protein 45                   | <a href="#">Fbxo45</a>        | 0.977 | -0.583 | 0.577637 | 0.797824 |
| 10646 | 10476033 | <a href="#">NM_183262</a>          | <a href="#">67333</a>  | serine/threonine kinase 35         | <a href="#">Stk35</a>         | 0.977 | -0.652 | 0.534541 | 0.768432 |
| 10647 | 10535124 | <a href="#">NM_026748</a>          | <a href="#">68510</a>  | integrator complex subunit 1       | <a href="#">Ints1</a>         | 0.977 | -0.443 | 0.67082  | 0.85389  |
| 10648 | 10386705 | <a href="#">NM_009548</a>          | <a href="#">22671</a>  | zinc finger protein 179            | <a href="#">Zfp179</a>        | 0.977 | -0.399 | 0.701397 | 0.869143 |
| 10649 | 10474081 | <a href="#">NM_007442</a>          | <a href="#">11695</a>  | aristaless 4                       | <a href="#">Alx4</a>          | 0.977 | -0.133 | 0.897789 | 0.959787 |
| 10650 | 10568805 | <a href="#">NM_183248</a>          | <a href="#">14912</a>  | NK6 transcription factor relat     | <a href="#">Nkx6-2</a>        | 0.977 | -0.204 | 0.844258 | 0.936764 |
| 10651 | 10565330 | <a href="#">NM_022985</a>          | <a href="#">65098</a>  | zinc finger, AN1-type domain 6     | <a href="#">Zfand6</a>        | 0.977 | -0.374 | 0.719145 | 0.877614 |
| 10652 | 10363845 | <a href="#">NM_001111121</a>       | <a href="#">76551</a>  | coiled-coil domain containing      | <a href="#">Cede6</a>         | 0.977 | -0.721 | 0.493721 | 0.739216 |
| 10653 | 10600247 |                                    |                        |                                    |                               | 0.977 | -0.199 | 0.848098 | 0.938472 |
| 10654 | 10582014 | <a href="#">BC100501</a>           | <a href="#">69528</a>  | RIKEN cDNA 1700030J22 gene         | <a href="#">1700030J22Rik</a> | 0.977 | -0.524 | 0.616215 | 0.822657 |
| 10655 | 10373367 | <a href="#">NM_001081040</a>       | <a href="#">210582</a> | coenzyme Q10 homolog A<br>(yeast)  | <a href="#">Coq10a</a>        | 0.977 | -0.741 | 0.482197 | 0.730954 |
| 10656 | 10582626 | <a href="#">NM_019552</a>          | <a href="#">56199</a>  | ATP-binding cassette, sub-fami     | <a href="#">Abcb10</a>        | 0.977 | -0.555 | 0.595889 | 0.809631 |
| 10657 | 10565250 | <a href="#">NM_030705</a>          | <a href="#">80889</a>  | mesoderm development<br>candidate  | <a href="#">Mesdc1</a>        | 0.977 | -0.732 | 0.487491 | 0.735095 |
| 10658 | 10375216 | <a href="#">NM_145962</a>          | <a href="#">211347</a> | pantothenate kinase 3              | <a href="#">Pank3</a>         | 0.977 | -0.435 | 0.676193 | 0.855911 |
| 10659 | 10417730 |                                    |                        |                                    |                               | 0.977 | -0.185 | 0.858268 | 0.943104 |
| 10660 | 10470696 | <a href="#">NM_026896</a>          | <a href="#">68975</a>  | mediator complex subunit 27        | <a href="#">Med27</a>         | 0.977 | -0.844 | 0.425812 | 0.68764  |
| 10661 | 10551011 | <a href="#">NM_027732</a>          | <a href="#">71241</a>  | doublesex and mab-3 related tr     | <a href="#">Dmrtc2</a>        | 0.977 | -0.043 | 0.967054 | 0.986963 |
| 10662 | 10383289 | <a href="#">NM_130862</a>          | <a href="#">108100</a> | brain-specific angiogenesis in     | <a href="#">Baiap2</a>        | 0.977 | -0.585 | 0.576453 | 0.797453 |
| 10663 | 10503602 | <a href="#">NM_172988</a>          | <a href="#">269514</a> | F-box and leucine-rich repeat      | <a href="#">Fbxl4</a>         | 0.977 | -0.454 | 0.663134 | 0.849961 |
| 10664 | 10579691 | <a href="#">NM_029782</a>          | <a href="#">73316</a>  | calreticulin 3                     | <a href="#">Calr3</a>         | 0.977 | 0.24   | 0.817014 | 0.927166 |
| 10665 | 10505326 | <a href="#">NM_019492</a>          | <a href="#">50780</a>  | regulator of G-protein signali     | <a href="#">Rgs3</a>          | 0.977 | -0.206 | 0.842217 | 0.936059 |
| 10666 | 10593652 | <a href="#">NM_007810</a>          | <a href="#">13075</a>  | cytochrome P450, family 19, su     | <a href="#">Cyp19a1</a>       | 0.977 | 0.196  | 0.849859 | 0.939479 |
| 10667 | 10395039 | <a href="#">NM_020557</a>          | <a href="#">22169</a>  | cytidine monophosphate (UMP-<br>CM | <a href="#">Cmpk2</a>         | 0.977 | -0.158 | 0.878493 | 0.95179  |
| 10668 | 10506415 | <a href="#">NM_025909</a>          | <a href="#">67013</a>  | OMA1 homolog, zinc<br>metallopept  | <a href="#">Oma1</a>          | 0.977 | -0.86  | 0.417445 | 0.680214 |
| 10669 | 10476349 | <a href="#">BC100475</a>           | <a href="#">73747</a>  | RIKEN cDNA 1110034G24<br>gene      | <a href="#">1110034G24Rik</a> | 0.977 | -0.714 | 0.497695 | 0.741949 |
| 10670 | 10418982 | <a href="#">NM_001033766</a>       | <a href="#">239036</a> | RIKEN cDNA 4930596D02<br>gene      | <a href="#">4930596D02Rik</a> | 0.977 | -0.222 | 0.830516 | 0.932033 |
| 10671 | 10525365 | <a href="#">NM_001042489</a>       | <a href="#">74096</a>  | hydrogen voltage-gated channel     | <a href="#">Hvcn1</a>         | 0.977 | -0.566 | 0.588855 | 0.805202 |
| 10672 | 10525487 | <a href="#">ENSMUST00000081006</a> | <a href="#">74366</a>  | RIKEN cDNA 4932422M17<br>gene      | <a href="#">4932422M17Rik</a> | 0.977 | -0.059 | 0.95443  | 0.982496 |
| 10673 | 10590427 | <a href="#">NM_021609</a>          | <a href="#">59289</a>  | chemokine binding protein 2        | <a href="#">Ccbp2</a>         | 0.977 | 0.095  | 0.926691 | 0.970959 |

|       |          |                                    |                           |                                |                                    |       |        |          |          |
|-------|----------|------------------------------------|---------------------------|--------------------------------|------------------------------------|-------|--------|----------|----------|
| 10674 | 10373372 | <a href="#">NM_001081040</a>       | <a href="#">210582</a>    | coenzyme Q10 homolog A (yeast) | <a href="#">Coq10a</a>             | 0.977 | -0.574 | 0.583685 | 0.801548 |
| 10675 | 10360544 | <a href="#">NM_016805</a>          | <a href="#">51810</a>     | heterogeneous nuclear ribonucl | <a href="#">Hnrmpu</a>             | 0.977 | -0.575 | 0.58294  | 0.801046 |
| 10676 | 10362692 | <a href="#">NM_027572</a>          | <a href="#">70840</a>     | solute carrier family 22 (orga | <a href="#">Slc22a16</a>           | 0.977 | 0.093  | 0.92821  | 0.971746 |
| 10677 | 10565437 | <a href="#">NM_028343</a>          | <a href="#">72759</a>     | transmembrane protein 135      | <a href="#">Tmem135</a>            | 0.977 | -0.333 | 0.748801 | 0.893692 |
| 10678 | 10528257 | <a href="#">NM_001080977</a>       | <a href="#">242860</a>    | round spermatid basic protein  | <a href="#">Rsbm11</a>             | 0.977 | -1.027 | 0.337845 | 0.613423 |
| 10679 | 10537558 | <a href="#">ENSMUST00000103262</a> | <a href="#">621968</a>    | T cell receptor beta variable  | <a href="#">Trbv1</a>              | 0.977 | 0.029  | 0.977525 | 0.990738 |
| 10680 | 10517056 |                                    |                           |                                |                                    | 0.977 | -0.205 | 0.843139 | 0.93639  |
| 10681 | 10543939 | <a href="#">BC064033</a>           | <a href="#">208164</a>    | cDNA sequence BC064033         | <a href="#">BC064033</a>           | 0.977 | -0.041 | 0.968367 | 0.987277 |
| 10682 | 10594582 | <a href="#">NM_001025612</a>       | <a href="#">382083</a>    | sorting nexin 22               | <a href="#">Snx22</a>              | 0.977 | -0.433 | 0.677886 | 0.856898 |
| 10683 | 10472040 | <a href="#">AF390105</a>           | <a href="#">227885</a>    | similar to Hsp90ab1 protein    | <a href="#">LOC227885</a>          | 0.977 | -0.385 | 0.711272 | 0.873556 |
| 10684 | 10465833 | <a href="#">NM_009073</a>          | <a href="#">19881</a>     | rod outer segment membrane pro | <a href="#">Rom1</a>               | 0.977 | -0.851 | 0.421995 | 0.684306 |
| 10685 | 10607330 | <a href="#">BC025887</a>           | <a href="#">331547</a>    | RIKEN cDNA A230072E10 gene     | <a href="#">A230072E10Rik</a>      | 0.977 | -0.308 | 0.766787 | 0.902924 |
| 10686 | 10438256 | <a href="#">BC125356</a>           | <a href="#">195333</a>    | goosecoid homebox 2            | <a href="#">Gsc2</a>               | 0.977 | -0.39  | 0.707747 | 0.872268 |
| 10687 | 10422194 | <a href="#">NM_134077</a>          | <a href="#">74213</a>     | RNA binding motif protein 26   | <a href="#">Rbm26</a>              | 0.977 | -0.666 | 0.525846 | 0.761906 |
| 10688 | 10501676 | <a href="#">NM_008246</a>          | <a href="#">15247</a>     | hippocampus abundant gene tran | <a href="#">Hiat1</a>              | 0.977 | -0.243 | 0.814993 | 0.925775 |
| 10689 | 10520942 | <a href="#">NM_001081407</a>       | <a href="#">665270</a>    | phospholipase B1               | <a href="#">Plb1</a>               | 0.977 | 0.238  | 0.81827  | 0.927645 |
| 10690 | 10403110 | <a href="#">ENSMUST00000100985</a> | <a href="#">100038689</a> | predicted gene, ENSMUSG0000007 | <a href="#">ENSMUSG00000072792</a> | 0.977 | -0.313 | 0.763499 | 0.901503 |
| 10691 | 10505515 |                                    |                           |                                |                                    | 0.977 | -0.13  | 0.90005  | 0.960389 |
| 10692 | 10501091 | <a href="#">NM_001045807</a>       | <a href="#">229700</a>    | RNA binding motif protein 15   | <a href="#">Rbm15</a>              | 0.977 | -0.514 | 0.622671 | 0.827306 |
| 10693 | 10386683 | <a href="#">NM_026183</a>          | <a href="#">67473</a>     | solute carrier family 47, memb | <a href="#">Slc47a1</a>            | 0.977 | -0.187 | 0.856488 | 0.941981 |
| 10694 | 10592237 | <a href="#">NM_007915</a>          | <a href="#">13663</a>     | etoposide induced 2.4 mRNA     | <a href="#">Ei24</a>               | 0.977 | -0.442 | 0.671284 | 0.854164 |
| 10695 | 10513880 | <a href="#">ENSMUST00000084489</a> | <a href="#">791420</a>    | predicted gene, OTTMUSG0000000 | <a href="#">OTTMUSG00000000276</a> | 0.977 | -0.263 | 0.799973 | 0.919271 |
| 10696 | 10540785 | <a href="#">BC010582</a>           | <a href="#">101314</a>    | RIKEN cDNA 6720456B07 gene     | <a href="#">6720456B07Rik</a>      | 0.977 | -0.987 | 0.355532 | 0.628098 |
| 10697 | 10371217 | <a href="#">NM_010102</a>          | <a href="#">13611</a>     | endothelial differentiation, G | <a href="#">Edg6</a>               | 0.977 | -0.273 | 0.792275 | 0.915409 |
| 10698 | 10491300 | <a href="#">NM_011386</a>          | <a href="#">20482</a>     | SKI-like                       | <a href="#">Skil</a>               | 0.977 | -0.325 | 0.754625 | 0.896745 |
| 10699 | 10355024 | <a href="#">NM_027407</a>          | <a href="#">70375</a>     | islet cell autoantigen 1-like  | <a href="#">Ica11</a>              | 0.977 | -0.216 | 0.835172 | 0.933323 |
| 10700 | 10556266 | <a href="#">NM_009516</a>          | <a href="#">22390</a>     | wee 1 homolog (S. pombe)       | <a href="#">Wee1</a>               | 0.977 | -0.36  | 0.729468 | 0.882928 |
| 10701 | 10564290 | <a href="#">NM_021366</a>          | <a href="#">50794</a>     | Kruppel-like factor 13         | <a href="#">Klf13</a>              | 0.977 | -0.092 | 0.928834 | 0.972036 |
| 10702 | 10417798 | <a href="#">NM_021542</a>          | <a href="#">16529</a>     | potassium channel, subfamily K | <a href="#">Kcnk5</a>              | 0.977 | -0.461 | 0.658138 | 0.847091 |
| 10703 | 10566870 | <a href="#">NM_153525</a>          | <a href="#">233724</a>    | transmembrane protein 41B      | <a href="#">Tmem41b</a>            | 0.977 | -0.946 | 0.37462  | 0.644557 |
| 10704 | 10426467 | <a href="#">NM_178789</a>          | <a href="#">320709</a>    | transmembrane protein 117      | <a href="#">Tmem117</a>            | 0.977 | -0.196 | 0.850366 | 0.939843 |
| 10705 | 10537642 | <a href="#">NM_001038997</a>       | <a href="#">436523</a>    | predicted gene, EG436523       | <a href="#">EG436523</a>           | 0.977 | -0.283 | 0.785222 | 0.912507 |
| 10706 | 10545835 | <a href="#">BC115452</a>           | <a href="#">73327</a>     | RIKEN cDNA 1700040I03 gene     | <a href="#">1700040I03Rik</a>      | 0.977 | -0.562 | 0.591196 | 0.806572 |
| 10707 | 10468974 | <a href="#">NM_177647</a>          | <a href="#">227526</a>    | arginine-rich, mutated in earl | <a href="#">Armet11</a>            | 0.977 | -0.65  | 0.536011 | 0.769315 |
| 10708 | 10601099 | <a href="#">NM_021521</a>          | <a href="#">59024</a>     | mediator of RNA polymerase II  | <a href="#">Med12</a>              | 0.977 | -0.537 | 0.607736 | 0.817428 |
| 10709 | 10368918 | <a href="#">NM_175407</a>          | <a href="#">109205</a>    | sine oculis-binding protein ho | <a href="#">Sobp</a>               | 0.977 | -0.092 | 0.929404 | 0.972164 |
| 10710 | 10389238 | <a href="#">NM_019819</a>          | <a href="#">56405</a>     | dual specificity phosphatase 1 | <a href="#">Dusp14</a>             | 0.977 | -0.456 | 0.661657 | 0.84929  |
| 10711 | 10365727 |                                    |                           |                                |                                    | 0.977 | -0.62  | 0.554075 | 0.783409 |
| 10712 | 10594965 | <a href="#">NM_001081153</a>       | <a href="#">208898</a>    | unc-13 homolog C (C. elegans)  | <a href="#">Unc13c</a>             | 0.977 | -0.033 | 0.974904 | 0.98939  |
| 10713 | 10528090 | <a href="#">NM_198620</a>          | <a href="#">242819</a>    | RUN domain containing 3B       | <a href="#">Runde3b</a>            | 0.977 | -0.921 | 0.386995 | 0.655973 |
| 10714 | 10576532 | <a href="#">NM_016909</a>          | <a href="#">53424</a>     | translin-associated factor X   | <a href="#">Tsnax</a>              | 0.977 | -0.586 | 0.57544  | 0.797076 |
| 10715 | 10549382 | <a href="#">NM_001034903</a>       | <a href="#">545893</a>    | predicted gene, EG545893       | <a href="#">EG545893</a>           | 0.977 | -0.248 | 0.811193 | 0.923829 |
| 10716 | 10516640 | <a href="#">NM_018799</a>          | <a href="#">54709</a>     | eukaryotic translation initiat | <a href="#">Eif3i</a>              | 0.977 | -1.337 | 0.22186  | 0.491462 |
| 10717 | 10597162 | <a href="#">NM_177771</a>          | <a href="#">270201</a>    | kelch-like 18 (Drosophila)     | <a href="#">Klhl18</a>             | 0.977 | -0.337 | 0.745479 | 0.891679 |
| 10718 | 10510452 | <a href="#">NM_001025296</a>       | <a href="#">13347</a>     | DNA fragmentation factor, alph | <a href="#">Dffa</a>               | 0.977 | -0.21  | 0.839144 | 0.934917 |
| 10719 | 10389373 | <a href="#">NM_025825</a>          | <a href="#">66884</a>     | amyloid beta precursor protein | <a href="#">Appbp2</a>             | 0.977 | -0.481 | 0.64459  | 0.839238 |
| 10720 | 10433507 | <a href="#">NM_007575</a>          | <a href="#">12265</a>     | class II transactivator        | <a href="#">Ciita</a>              | 0.977 | -0.261 | 0.801311 | 0.919489 |
| 10721 | 10370397 | <a href="#">NM_009646</a>          | <a href="#">11634</a>     | autoimmune regulator (autoimmu | <a href="#">Aire</a>               | 0.977 | -0.509 | 0.625953 | 0.82953  |
| 10722 | 10377380 | <a href="#">NM_026889</a>          | <a href="#">68964</a>     | RIKEN cDNA 1500010J02 gene     | <a href="#">1500010J02Rik</a>      | 0.977 | -0.663 | 0.527746 | 0.763341 |
| 10723 | 10578771 | <a href="#">NM_144731</a>          | <a href="#">108150</a>    | UDP-N-acetyl-alpha-D-galactosa | <a href="#">Galnt7</a>             | 0.976 | -0.964 | 0.366199 | 0.637219 |
| 10724 | 10376402 | <a href="#">NM_207693</a>          | <a href="#">404346</a>    | olfactory receptor 216         | <a href="#">Olfr216</a>            | 0.976 | -0.115 | 0.911675 | 0.964691 |
| 10725 | 10460529 | <a href="#">NM_145495</a>          | <a href="#">225870</a>    | Ras and Rab interactor 1       | <a href="#">Rin1</a>               | 0.976 | -0.14  | 0.892635 | 0.957773 |
| 10726 | 10568226 | <a href="#">BC010440</a>           | <a href="#">101604</a>    | RIKEN cDNA A230018I02 gene     | <a href="#">A230018I02Rik</a>      | 0.976 | -0.207 | 0.841751 | 0.926650 |

|       |          |                                    |                           |                                   |                                    |       |        |          |          |
|-------|----------|------------------------------------|---------------------------|-----------------------------------|------------------------------------|-------|--------|----------|----------|
| 10720 | 10508259 | <a href="#">BC010442</a>           | <a href="#">101604</a>    | RIKEN cDNA E450018J25 gene        | <a href="#">E450018J25Rik</a>      | 0.976 | -0.207 | 0.841731 | 0.936059 |
| 10727 | 10508533 | <a href="#">NM_028266</a>          | <a href="#">107581</a>    | collagen, type XVI, alpha 1       | <a href="#">Col16a1</a>            | 0.976 | -0.28  | 0.787019 | 0.912989 |
| 10728 | 10586920 | <a href="#">NM_001033536</a>       | <a href="#">319758</a>    | regulatory factor X domain con    | <a href="#">Rfxdc2</a>             | 0.976 | -0.733 | 0.486956 | 0.73476  |
| 10729 | 10573203 | <a href="#">NM_018771</a>          | <a href="#">67903</a>     | GIPC PDZ domain containing fam    | <a href="#">Gipc1</a>              | 0.976 | -0.824 | 0.436149 | 0.696174 |
| 10730 | 10587988 | <a href="#">NM_177352</a>          | <a href="#">235533</a>    | glycerol kinase 5 (putative)      | <a href="#">Gk5</a>                | 0.976 | -0.414 | 0.690664 | 0.864369 |
| 10731 | 10490942 |                                    |                           |                                   |                                    | 0.976 | -0.599 | 0.567545 | 0.792875 |
| 10732 | 10559095 | <a href="#">NM_028801</a>          | <a href="#">74180</a>     | mucin 5, subtype B, tracheobro    | <a href="#">Muc5b</a>              | 0.976 | -0.34  | 0.743857 | 0.89106  |
| 10733 | 10349828 | <a href="#">NM_010732</a>          | <a href="#">16980</a>     | leucine rich repeat protein 2,    | <a href="#">Lrm2</a>               | 0.976 | -0.47  | 0.651928 | 0.844083 |
| 10734 | 10397683 | <a href="#">NM_198311</a>          | <a href="#">76260</a>     | tetratricopeptide repeat domai    | <a href="#">Ttc8</a>               | 0.976 | -0.847 | 0.424396 | 0.686521 |
| 10735 | 10369661 | <a href="#">NM_026201</a>          | <a href="#">67500</a>     | cell division cycle and apopto    | <a href="#">Cear1</a>              | 0.976 | -0.717 | 0.496032 | 0.740712 |
| 10736 | 10585509 | <a href="#">NM_028049</a>          | <a href="#">71999</a>     | F-box protein 22                  | <a href="#">Fbxo22</a>             | 0.976 | -0.529 | 0.612571 | 0.820435 |
| 10737 | 10385583 | <a href="#">NM_008521</a>          | <a href="#">17001</a>     | leukotriene C4 synthase           | <a href="#">Ltc4s</a>              | 0.976 | -0.4   | 0.70047  | 0.86896  |
| 10738 | 10475866 | <a href="#">NM_207680</a>          | <a href="#">12125</a>     | BCL2-like 11 (apoptosis facili    | <a href="#">Bcl2l11</a>            | 0.976 | -0.698 | 0.506839 | 0.748732 |
| 10739 | 10390877 | <a href="#">NM_001039666</a>       | <a href="#">406221</a>    | keratin 40                        | <a href="#">Krt40</a>              | 0.976 | -0.314 | 0.762667 | 0.901202 |
| 10740 | 10456001 | <a href="#">NM_020600</a>          | <a href="#">20044</a>     | ribosomal protein S14             | <a href="#">Rps14</a>              | 0.976 | -0.796 | 0.451592 | 0.708606 |
| 10741 | 10592416 | <a href="#">NM_146508</a>          | <a href="#">258501</a>    | olfactory receptor 959            | <a href="#">Olf959</a>             | 0.976 | -0.178 | 0.863907 | 0.945829 |
| 10742 | 10557229 | <a href="#">BC016578</a>           | <a href="#">100134980</a> | hypothetical LOC100134980         | <a href="#">LOC100134980</a>       | 0.976 | -0.278 | 0.788822 | 0.914061 |
| 10743 | 10437748 | <a href="#">NM_146066</a>          | <a href="#">14852</a>     | G1 to S phase transition 1        | <a href="#">Gspt1</a>              | 0.976 | -0.899 | 0.397798 | 0.664302 |
| 10744 | 10518869 | <a href="#">NM_031867</a>          | <a href="#">110326</a>    | taste receptor, type 1, member    | <a href="#">Tas1r1</a>             | 0.976 | -0.504 | 0.629598 | 0.831325 |
| 10745 | 10477555 |                                    |                           |                                   |                                    | 0.976 | -0.132 | 0.898611 | 0.960077 |
| 10746 | 10372815 | <a href="#">NM_001081193</a>       | <a href="#">380664</a>    | LEM domain containing 3           | <a href="#">Lemd3</a>              | 0.976 | -0.18  | 0.861832 | 0.94442  |
| 10747 | 10521168 | <a href="#">NM_001001985</a>       | <a href="#">269642</a>    | N-acetyltransferase 8-like        | <a href="#">Nat8l</a>              | 0.976 | -0.273 | 0.792725 | 0.91549  |
| 10748 | 10393222 | <a href="#">NM_146032</a>          | <a href="#">217337</a>    | signal recognition particle 68    | <a href="#">Srp68</a>              | 0.976 | -0.821 | 0.437886 | 0.697031 |
| 10749 | 10450694 | <a href="#">NM_010397</a>          | <a href="#">15039</a>     | histocompatibility 2, T region    | <a href="#">H2-T22</a>             | 0.976 | 0.403  | 0.698373 | 0.867855 |
| 10750 | 10345882 | <a href="#">NM_023514</a>          | <a href="#">69527</a>     | mitochondrial ribosomal protei    | <a href="#">Mrps9</a>              | 0.976 | -0.498 | 0.633296 | 0.833255 |
| 10751 | 10532997 | <a href="#">ENSMUST00000078701</a> | <a href="#">78154</a>     | RIKEN cDNA 4930430022 gene        | <a href="#">4930430022Rik</a>      | 0.976 | 0.082  | 0.936986 | 0.975366 |
| 10752 | 10406108 | <a href="#">ENSMUST00000022049</a> | <a href="#">71390</a>     | RIKEN cDNA 5430425J12 gene        | <a href="#">5430425J12Rik</a>      | 0.976 | -0.331 | 0.750242 | 0.894442 |
| 10753 | 10601764 |                                    |                           |                                   |                                    | 0.976 | -0.127 | 0.902123 | 0.961561 |
| 10754 | 10573434 | <a href="#">NM_025648</a>          | <a href="#">66590</a>     | phenylalanyl-tRNA synthetase,     | <a href="#">Farsa</a>              | 0.976 | -1.012 | 0.344217 | 0.618521 |
| 10755 | 10344707 | <a href="#">NM_183028</a>          | <a href="#">319263</a>    | protein-L-isoaspartate (D-aspa    | <a href="#">Pcmt1</a>              | 0.976 | -0.656 | 0.532242 | 0.766334 |
| 10756 | 10362387 |                                    |                           |                                   |                                    | 0.976 | -0.336 | 0.746582 | 0.892388 |
| 10757 | 10386470 | <a href="#">ENSMUST00000057382</a> | <a href="#">320201</a>    | RIKEN cDNA 4930412M03 gene        | <a href="#">4930412M03Rik</a>      | 0.976 | -0.712 | 0.499017 | 0.742429 |
| 10758 | 10389391 | <a href="#">ENSMUST00000092818</a> | <a href="#">327986</a>    | predicted gene,<br>OTTMUSG0000000 | <a href="#">OTTMUSG0000001044</a>  | 0.976 | -0.128 | 0.901907 | 0.961403 |
| 10759 | 10374553 | <a href="#">NM_153596</a>          | <a href="#">103765</a>    | transmembrane protein 17          | <a href="#">Tmem17</a>             | 0.976 | -0.72  | 0.494296 | 0.739556 |
| 10760 | 10577025 | <a href="#">NM_011227</a>          | <a href="#">19332</a>     | RAB20, member RAS oncogene fam    | <a href="#">Rab20</a>              | 0.976 | -0.375 | 0.718578 | 0.877128 |
| 10761 | 10441633 | <a href="#">NM_009835</a>          | <a href="#">12458</a>     | chemokine (C-C motif) receptor    | <a href="#">Ccr6</a>               | 0.976 | 0.025  | 0.981039 | 0.99199  |
| 10762 | 10449666 | <a href="#">NM_009362</a>          | <a href="#">21784</a>     | trefoil factor 1                  | <a href="#">Tff1</a>               | 0.976 | -0.237 | 0.819326 | 0.928264 |
| 10763 | 10516266 | <a href="#">NM_153159</a>          | <a href="#">230738</a>    | zinc finger CCCH type containi    | <a href="#">Zc3h12a</a>            | 0.976 | -0.372 | 0.720256 | 0.878163 |
| 10764 | 10588927 | <a href="#">BC061048</a>           | <a href="#">112418</a>    | RIKEN cDNA 1700102P08 gene        | <a href="#">1700102P08Rik</a>      | 0.976 | -0.172 | 0.868089 | 0.947171 |
| 10765 | 10429856 | <a href="#">ENSMUST00000100512</a> | <a href="#">100038659</a> | predicted gene,<br>ENSMUSG0000007 | <a href="#">ENSMUSG00000075583</a> | 0.976 | 0.325  | 0.754049 | 0.896425 |
| 10766 | 10477897 | <a href="#">NM_146128</a>          | <a href="#">228836</a>    | discs, large homolog-associate    | <a href="#">Dlgap4</a>             | 0.976 | -0.495 | 0.635603 | 0.834519 |
| 10767 | 10600971 | <a href="#">BC153817</a>           | <a href="#">408193</a>    | OTU domain containing 6A          | <a href="#">Otud6a</a>             | 0.976 | -0.336 | 0.746528 | 0.892388 |
| 10768 | 10481830 | <a href="#">NM_027947</a>          | <a href="#">71834</a>     | zinc finger and BTB domain con    | <a href="#">Zbtb43</a>             | 0.976 | -0.655 | 0.532684 | 0.766762 |
| 10769 | 10431282 | <a href="#">AK012625</a>           | <a href="#">72146</a>     | RIKEN cDNA 2810001A02 gene        | <a href="#">2810001A02Rik</a>      | 0.976 | -0.379 | 0.71544  | 0.875402 |
| 10770 | 10597960 | <a href="#">NM_139142</a>          | <a href="#">102680</a>    | solute carrier family 6 (neuro    | <a href="#">Slc6a20a</a>           | 0.976 | 0.009  | 0.992898 | 0.997248 |
| 10771 | 10371466 | <a href="#">NM_013722</a>          | <a href="#">27204</a>     | synapsin III                      | <a href="#">Syn3</a>               | 0.976 | -0.284 | 0.784348 | 0.912074 |
| 10772 | 10380620 |                                    |                           |                                   |                                    | 0.976 | 0.143  | 0.889886 | 0.956717 |
| 10773 | 10425651 | <a href="#">AK132940</a>           | <a href="#">328573</a>    | RIKEN cDNA 4930407I10 gene        | <a href="#">4930407I10Rik</a>      | 0.976 | -0.424 | 0.683842 | 0.86005  |
| 10774 | 10543872 | <a href="#">BC029235</a>           | <a href="#">78412</a>     | RIKEN cDNA 3110062M04 gene        | <a href="#">3110062M04Rik</a>      | 0.976 | -0.89  | 0.402159 | 0.667342 |
| 10775 | 10598562 | <a href="#">BC055780</a>           | <a href="#">102941</a>    | RIKEN cDNA B630019K06 gene        | <a href="#">B630019K06Rik</a>      | 0.976 | -0.656 | 0.532052 | 0.766201 |

|       |          |                                    |                           | gene                                          |                                    |       |        |          |          |
|-------|----------|------------------------------------|---------------------------|-----------------------------------------------|------------------------------------|-------|--------|----------|----------|
| 10776 | 10506652 | <a href="#">NM_001081272</a>       | <a href="#">546840</a>    | similar to low density lipopro                | <a href="#">LOC546840</a>          | 0.976 | -0.39  | 0.707871 | 0.872288 |
| 10777 | 10497752 | <a href="#">AF414101</a>           | <a href="#">52502</a>     | calcium regulated heat stable                 | <a href="#">Carhsp1</a>            | 0.976 | -0.955 | 0.370407 | 0.641116 |
| 10778 | 10541753 | <a href="#">BC065170</a>           | <a href="#">319352</a>    | RIKEN cDNA C530028O21 gene                    | <a href="#">C530028O21Rik</a>      | 0.976 | -0.173 | 0.867396 | 0.946934 |
| 10779 | 10605729 | <a href="#">NM_001044386</a>       | <a href="#">22764</a>     | zinc finger protein X-linked                  | <a href="#">Zfx</a>                | 0.976 | -0.997 | 0.351061 | 0.624551 |
| 10780 | 10582129 | <a href="#">NM_021441</a>          | <a href="#">21341</a>     | TATA box binding protein (Tbp)                | <a href="#">Taf1c</a>              | 0.976 | -0.238 | 0.818651 | 0.927928 |
| 10781 | 10432785 | <a href="#">NM_027011</a>          | <a href="#">110308</a>    | keratin 5                                     | <a href="#">Krt5</a>               | 0.976 | 0.324  | 0.755146 | 0.897043 |
| 10782 | 10447564 | <a href="#">XM_001476448</a>       | <a href="#">100046577</a> | hypothetical protein LOC100046                | <a href="#">LOC100046577</a>       | 0.976 | -0.572 | 0.58497  | 0.802565 |
| 10783 | 10556035 | <a href="#">NM_147034</a>          | <a href="#">259036</a>    | olfactory receptor 713                        | <a href="#">Olf713</a>             | 0.976 | -0.42  | 0.686974 | 0.861886 |
| 10784 | 10434629 | <a href="#">NM_172821</a>          | <a href="#">71751</a>     | mitogen-activated protein kina                | <a href="#">Map3k13</a>            | 0.976 | -0.292 | 0.778254 | 0.909741 |
| 10785 | 10387492 | <a href="#">NM_144824</a>          | <a href="#">216853</a>    | WD repeat domain 79                           | <a href="#">Wdr79</a>              | 0.976 | -0.916 | 0.389503 | 0.658209 |
| 10786 | 10404939 | <a href="#">AK008011</a>           | <a href="#">69829</a>     | RIKEN cDNA 2010001K21 gene                    | <a href="#">2010001K21Rik</a>      | 0.976 | -0.176 | 0.8651   | 0.946153 |
| 10787 | 10546659 |                                    |                           |                                               |                                    | 0.976 | 0.104  | 0.920105 | 0.968088 |
| 10788 | 10595990 | <a href="#">NM_028768</a>          | <a href="#">74125</a>     | armadillo repeat containing 8                 | <a href="#">Armc8</a>              | 0.976 | -1.114 | 0.30111  | 0.5773   |
| 10789 | 10356177 | <a href="#">NM_152915</a>          | <a href="#">227325</a>    | delta/notch-like EGF-related r                | <a href="#">Dner</a>               | 0.976 | -0.106 | 0.918217 | 0.967805 |
| 10790 | 10505931 | <a href="#">NM_026319</a>          | <a href="#">67694</a>     | intraflagellar transport 74 ho                | <a href="#">Ift74</a>              | 0.976 | -0.892 | 0.401273 | 0.666759 |
| 10791 | 10371420 | <a href="#">NM_181650</a>          | <a href="#">72843</a>     | PR domain containing 4                        | <a href="#">Prdm4</a>              | 0.976 | -0.773 | 0.464343 | 0.718115 |
| 10792 | 10559635 | <a href="#">NM_024172</a>          | <a href="#">66245</a>     | RIKEN cDNA 1500019G21 gene                    | <a href="#">1500019G21Rik</a>      | 0.976 | -0.551 | 0.598036 | 0.811052 |
| 10793 | 10524790 | <a href="#">NM_007708</a>          | <a href="#">12704</a>     | citron                                        | <a href="#">Cit</a>                | 0.976 | -0.562 | 0.591158 | 0.806572 |
| 10794 | 10489237 | <a href="#">AK040893</a>           | <a href="#">68108</a>     | RIKEN cDNA 9430008C03 gene                    | <a href="#">9430008C03Rik</a>      | 0.976 | 0.149  | 0.885905 | 0.955303 |
| 10795 | 10423185 | <a href="#">NM_026799</a>          | <a href="#">14000</a>     | ribonuclease III, nuclear                     | <a href="#">Rnasen</a>             | 0.976 | -1.379 | 0.20912  | 0.474118 |
| 10796 | 10577222 | <a href="#">BC029192</a>           | <a href="#">66423</a>     | RIKEN cDNA 2410022L05 gene                    | <a href="#">2410022L05Rik</a>      | 0.976 | -0.386 | 0.710853 | 0.873183 |
| 10797 | 10454647 | <a href="#">ENSMUST00000097634</a> | <a href="#">433171</a>    | predicted gene,                               | <a href="#">ENSMUSG00000073610</a> | 0.976 | -0.523 | 0.616638 | 0.822962 |
| 10798 | 10589494 | <a href="#">NM_013884</a>          | <a href="#">29873</a>     | ENSMUSG0000007 chondroitin sulfate proteoglyc | <a href="#">Cspg5</a>              | 0.976 | -0.204 | 0.844249 | 0.936764 |
| 10799 | 10444068 | <a href="#">NM_001025313</a>       | <a href="#">21356</a>     | TAP binding protein                           | <a href="#">Tapbp</a>              | 0.976 | -0.497 | 0.63416  | 0.833715 |
| 10800 | 10507675 | <a href="#">AY454346</a>           | <a href="#">16656</a>     | human immunodeficiency virus t                | <a href="#">Hivp3</a>              | 0.976 | -0.105 | 0.919223 | 0.967863 |
| 10801 | 10458283 | <a href="#">ENSMUST00000097619</a> | <a href="#">381148</a>    | gene model 1614, (NCBI)                       | <a href="#">Gm1614</a>             | 0.976 | 0.055  | 0.957518 | 0.983902 |
| 10802 | 10539921 | <a href="#">NM_175017</a>          | <a href="#">232217</a>    | RIKEN cDNA 4933427D06 gene                    | <a href="#">4933427D06Rik</a>      | 0.976 | 0.132  | 0.898849 | 0.960104 |
| 10803 | 10360828 | <a href="#">NM_001033547</a>       | <a href="#">433386</a>    | RIKEN cDNA 4922505E12 gene                    | <a href="#">4922505E12Rik</a>      | 0.975 | -0.094 | 0.927648 | 0.971576 |
| 10804 | 10410449 | <a href="#">ENSMUST00000070942</a> | <a href="#">210373</a>    | RIKEN cDNA A530095I07 gene                    | <a href="#">A530095I07Rik</a>      | 0.975 | -0.006 | 0.995279 | 0.998159 |
| 10805 | 10563447 | <a href="#">NM_018795</a>          | <a href="#">27421</a>     | ATP-binding cassette, sub-fami                | <a href="#">Abcc6</a>              | 0.975 | -0.393 | 0.70539  | 0.871546 |
| 10806 | 10405001 | <a href="#">NM_001039179</a>       | <a href="#">76895</a>     | bicaudal D homolog 2 (Drosophi                | <a href="#">Bicd2</a>              | 0.975 | -0.175 | 0.86608  | 0.946491 |
| 10807 | 10361265 |                                    |                           |                                               |                                    | 0.975 | -0.426 | 0.682797 | 0.859827 |
| 10808 | 10504373 | <a href="#">ENSMUST00000105153</a> | <a href="#">100038450</a> | predicted gene, OTTMUSG0000000                | <a href="#">OTTMUSG0000007018</a>  | 0.975 | 0.229  | 0.825575 | 0.929887 |
| 10809 | 10376715 | <a href="#">NM_001009927</a>       | <a href="#">237781</a>    | Smith-Magenis syndrome chromos                | <a href="#">Smer7</a>              | 0.975 | -0.49  | 0.638459 | 0.835923 |
| 10810 | 10393955 | <a href="#">NM_026824</a>          | <a href="#">68730</a>     | dihydrouridine synthase 1-like                | <a href="#">Dus11</a>              | 0.975 | -0.884 | 0.405191 | 0.669695 |
| 10811 | 10370892 | <a href="#">NM_025852</a>          | <a href="#">66932</a>     | REX1, RNA exonuclease 1 homolo                | <a href="#">Rexo1</a>              | 0.975 | -0.738 | 0.48411  | 0.732715 |
| 10812 | 10437992 | <a href="#">NM_152816</a>          | <a href="#">74006</a>     | dynamin 1-like                                | <a href="#">Dnm11</a>              | 0.975 | -0.644 | 0.539524 | 0.7722   |
| 10813 | 10417544 | <a href="#">NM_053115</a>          | <a href="#">93732</a>     | acyl-Coenzyme A oxidase 2, bra                | <a href="#">Acox2</a>              | 0.975 | 0.157  | 0.879196 | 0.952124 |
| 10814 | 10500157 | <a href="#">NM_018877</a>          | <a href="#">84505</a>     | SET domain, bifurcated 1                      | <a href="#">Setdb1</a>             | 0.975 | -0.732 | 0.487219 | 0.734947 |
| 10815 | 10566199 | <a href="#">NM_147111</a>          | <a href="#">259115</a>    | olfactory receptor 586                        | <a href="#">Olf7586</a>            | 0.975 | -0.24  | 0.816953 | 0.927145 |
| 10816 | 10573515 | <a href="#">BC029622</a>           | <a href="#">68544</a>     | RIKEN cDNA 2310036O22 gene                    | <a href="#">2310036O22Rik</a>      | 0.975 | -0.708 | 0.501219 | 0.744202 |
| 10817 | 10537098 | <a href="#">BC087908</a>           | <a href="#">76382</a>     | RIKEN cDNA 1700012A03 gene                    | <a href="#">1700012A03Rik</a>      | 0.975 | -0.13  | 0.900075 | 0.960389 |
| 10818 | 10588419 | <a href="#">NM_025651</a>          | <a href="#">66595</a>     | asteroid homolog 1 (Drosophila                | <a href="#">Aste1</a>              | 0.975 | -0.635 | 0.545088 | 0.77708  |
| 10819 | 10465033 | <a href="#">ENSMUST00000044527</a> | <a href="#">78306</a>     | testis specific 10 interacting                | <a href="#">Tsga10ip</a>           | 0.975 | -0.25  | 0.809204 | 0.923158 |
| 10820 | 10408348 | <a href="#">NM_001013389</a>       | <a href="#">380836</a>    | MRS2 magnesium homeostasis fac                | <a href="#">Mrs2</a>               | 0.975 | -0.561 | 0.591956 | 0.807001 |
| 10821 | 10445558 | <a href="#">NM_207161</a>          | <a href="#">381101</a>    | cDNA sequence BC048355                        | <a href="#">BC048355</a>           | 0.975 | -1.254 | 0.249033 | 0.522842 |
| 10822 | 10434148 | <a href="#">NM_008307</a>          | <a href="#">15547</a>     | HpaII tiny fragments locus 9c                 | <a href="#">Htf9c</a>              | 0.975 | -0.965 | 0.365645 | 0.636847 |

|       |          |                                    |                        |                                   |                                    |       |        |          |          |
|-------|----------|------------------------------------|------------------------|-----------------------------------|------------------------------------|-------|--------|----------|----------|
| 10823 | 10451943 | <a href="#">NM_001077348</a>       | <a href="#">66968</a>  | RIKEN cDNA 23100/6L09 gene        | <a href="#">23100/6L09Rik</a>      | 0.975 | -0.183 | 0.859826 | 0.943624 |
| 10824 | 10552030 | <a href="#">AK049951</a>           | <a href="#">791088</a> | predicted gene,<br>ENSMUSG0000005 | <a href="#">ENSMUSG00000052691</a> | 0.975 | 0.168  | 0.871009 | 0.948568 |
| 10825 | 10361616 |                                    |                        |                                   |                                    | 0.975 | -0.204 | 0.843695 | 0.936632 |
| 10826 | 10470816 | <a href="#">NM_028923</a>          | <a href="#">74412</a>  | GLE1 RNA export mediator<br>(yeas | <a href="#">Gle1</a>               | 0.975 | -0.296 | 0.775407 | 0.90807  |
| 10827 | 10362372 | <a href="#">AK034141</a>           | <a href="#">212448</a> | RIKEN cDNA 9330159F19 gene        | <a href="#">9330159F19Rik</a>      | 0.975 | -0.315 | 0.761991 | 0.900992 |
| 10828 | 10519183 | <a href="#">NM_179203</a>          | <a href="#">108888</a> | ATPase family, AAA domain<br>cont | <a href="#">Atad3a</a>             | 0.975 | -0.584 | 0.577271 | 0.797771 |
| 10829 | 10545471 | <a href="#">NM_019715</a>          | <a href="#">74287</a>  | potassium channel modulatory f    | <a href="#">Kcmf1</a>              | 0.975 | -0.894 | 0.400395 | 0.666294 |
| 10830 | 10474921 | <a href="#">NM_028054</a>          | <a href="#">72008</a>  | zinc finger, FYVE domain conta    | <a href="#">Zfyve19</a>            | 0.975 | -0.622 | 0.552956 | 0.782578 |
| 10831 | 10413967 | <a href="#">ENSMUST00000096028</a> | <a href="#">268729</a> | gene model 626, (NCBI)            | <a href="#">Gm626</a>              | 0.975 | -0.117 | 0.909672 | 0.964056 |
| 10832 | 10361869 | <a href="#">NM_173390</a>          | <a href="#">215819</a> | NHS-like 1                        | <a href="#">Nhs1l</a>              | 0.975 | -0.742 | 0.481282 | 0.730704 |
| 10833 | 10537955 |                                    |                        |                                   |                                    | 0.975 | -0.071 | 0.945482 | 0.97847  |
| 10834 | 10529957 | <a href="#">ENSMUST00000030971</a> | <a href="#">70693</a>  | G protein-coupled receptor 125    | <a href="#">Gpr125</a>             | 0.975 | -0.903 | 0.395811 | 0.663394 |
| 10835 | 10385995 | <a href="#">NM_177471</a>          | <a href="#">52570</a>  | coiled-coil domain containing     | <a href="#">Ccdc69</a>             | 0.975 | -0.254 | 0.806734 | 0.921832 |
| 10836 | 10365088 | <a href="#">AY934504</a>           | <a href="#">70312</a>  | RIKEN cDNA 2510012J08 gene        | <a href="#">2510012J08Rik</a>      | 0.975 | -0.986 | 0.356252 | 0.628749 |
| 10837 | 10511723 |                                    |                        |                                   |                                    | 0.975 | -0.382 | 0.713633 | 0.874653 |
| 10838 | 10594652 | <a href="#">NM_030717</a>          | <a href="#">80907</a>  | lactamase, beta                   | <a href="#">Lactb</a>              | 0.975 | -0.489 | 0.639301 | 0.836316 |
| 10839 | 10496295 | <a href="#">NM_025356</a>          | <a href="#">66105</a>  | ubiquitin-conjugating enzyme E    | <a href="#">Ube2d3</a>             | 0.975 | -0.487 | 0.640987 | 0.837375 |
| 10840 | 10432157 | <a href="#">NM_010679</a>          | <a href="#">16770</a>  | lactalbumin, alpha                | <a href="#">Lalba</a>              | 0.975 | -0.495 | 0.635638 | 0.834519 |
| 10841 | 10388160 | <a href="#">NM_001004148</a>       | <a href="#">237831</a> | solute carrier family 13 (sodi    | <a href="#">Slc13a5</a>            | 0.975 | -0.021 | 0.983965 | 0.993077 |
| 10842 | 10574976 | <a href="#">NM_133792</a>          | <a href="#">192654</a> | lysophospholipase 3               | <a href="#">Lypla3</a>             | 0.975 | -0.496 | 0.6344   | 0.833748 |
| 10843 | 10361156 | <a href="#">NM_144814</a>          | <a href="#">214742</a> | REST corepressor 3                | <a href="#">Rcor3</a>              | 0.975 | -0.7   | 0.505592 | 0.747576 |
| 10844 | 10398069 | <a href="#">NM_009253</a>          | <a href="#">20717</a>  | serine (or cysteine) peptidase    | <a href="#">Serpina3m</a>          | 0.975 | -0.024 | 0.981528 | 0.992092 |
| 10845 | 10590654 | <a href="#">NM_026276</a>          | <a href="#">67618</a>  | aminoadipate-semialdehyde dehy    | <a href="#">Aasdhppt</a>           | 0.975 | -1.182 | 0.274548 | 0.54916  |
| 10846 | 10475264 | <a href="#">NM_010761</a>          | <a href="#">17151</a>  | cyclin D-type binding-protein     | <a href="#">Cndbp1</a>             | 0.975 | -0.649 | 0.536187 | 0.76935  |
| 10847 | 10491058 | <a href="#">NR_004439</a>          | <a href="#">19784</a>  | ribonuclease P RNA-like 2         | <a href="#">Rprl2</a>              | 0.975 | -0.182 | 0.860693 | 0.943954 |
| 10848 | 10348032 | <a href="#">NM_030184</a>          | <a href="#">78795</a>  | armadillo repeat containing 9     | <a href="#">Armc9</a>              | 0.975 | -0.596 | 0.569546 | 0.794081 |
| 10849 | 10505308 | <a href="#">BC116650</a>           | <a href="#">214106</a> | RIKEN cDNA 4933430I17 gene        | <a href="#">4933430I17Rik</a>      | 0.975 | -0.23  | 0.824235 | 0.929508 |
| 10850 | 10557342 | <a href="#">NM_021887</a>          | <a href="#">60504</a>  | interleukin 21 receptor           | <a href="#">Il21r</a>              | 0.975 | -0.28  | 0.787347 | 0.913152 |
| 10851 | 10355628 | <a href="#">NM_021313</a>          | <a href="#">57751</a>  | ring finger protein 25            | <a href="#">Rnf25</a>              | 0.975 | -0.787 | 0.456605 | 0.712611 |
| 10852 | 10600284 | <a href="#">NM_019684</a>          | <a href="#">56504</a>  | serine/arginine-rich protein s    | <a href="#">Srpk3</a>              | 0.975 | -0.423 | 0.684889 | 0.860701 |
| 10853 | 10604932 | <a href="#">NM_138309</a>          | <a href="#">171486</a> | Cd99 antigen-like 2               | <a href="#">Cd99l2</a>             | 0.975 | -0.986 | 0.356211 | 0.628749 |
| 10854 | 10363377 |                                    |                        |                                   |                                    | 0.975 | -0.123 | 0.905646 | 0.963405 |
| 10855 | 10515960 | <a href="#">NM_001081142</a>       | <a href="#">60613</a>  | potassium voltage-gated channe    | <a href="#">Kcnq4</a>              | 0.975 | 0.216  | 0.835293 | 0.933323 |
| 10856 | 10510950 | <a href="#">NM_010419</a>          | <a href="#">15208</a>  | hairy and enhancer of split 5     | <a href="#">Hes5</a>               | 0.975 | -0.248 | 0.811401 | 0.923946 |
| 10857 | 10574676 | <a href="#">NM_030152</a>          | <a href="#">78688</a>  | nucleolar protein 3 (apoptosis    | <a href="#">Nol3</a>               | 0.975 | 0.187  | 0.856588 | 0.942035 |
| 10858 | 10534190 | <a href="#">NM_033572</a>          | <a href="#">94254</a>  | Williams-Beuren syndrome<br>chrom | <a href="#">Wbscr16</a>            | 0.975 | -0.496 | 0.634646 | 0.83389  |
| 10859 | 10545576 | <a href="#">NM_026490</a>          | <a href="#">56284</a>  | mitochondrial ribosomal protei    | <a href="#">Mrpl19</a>             | 0.975 | -0.825 | 0.435543 | 0.695606 |
| 10860 | 10372750 | <a href="#">ENSMUST00000020315</a> | <a href="#">71902</a>  | cullin associated and neddylat    | <a href="#">Cand1</a>              | 0.975 | -0.994 | 0.352272 | 0.625281 |
| 10861 | 10572622 | <a href="#">NM_032544</a>          | <a href="#">70359</a>  | GTP binding protein 3             | <a href="#">Gtpbp3</a>             | 0.975 | -0.332 | 0.749086 | 0.893932 |
| 10862 | 10420254 | <a href="#">NM_008572</a>          | <a href="#">17231</a>  | mast cell protease 8              | <a href="#">Mcpt8</a>              | 0.975 | -0.357 | 0.731406 | 0.884161 |
| 10863 | 10459292 | <a href="#">ENSMUST00000064248</a> | <a href="#">791322</a> | predicted gene,<br>ENSMUSG0000005 | <a href="#">ENSMUSG00000052390</a> | 0.975 | -0.447 | 0.667681 | 0.851783 |
| 10864 | 10474919 | <a href="#">NM_001039223</a>       | <a href="#">623781</a> | predicted gene,<br>OTTMUSG0000001 | <a href="#">OTTMUSG00000015762</a> | 0.975 | 0.164  | 0.874423 | 0.949978 |
| 10865 | 10384974 | <a href="#">NM_008374</a>          | <a href="#">16199</a>  | interleukin 9 receptor            | <a href="#">Il9r</a>               | 0.975 | -0.041 | 0.968543 | 0.987362 |
| 10866 | 10416689 | <a href="#">NM_001030294</a>       | <a href="#">380924</a> | olfactomedin 4                    | <a href="#">Olfm4</a>              | 0.975 | 0.067  | 0.948566 | 0.980098 |
| 10867 | 10394018 | <a href="#">NM_027745</a>          | <a href="#">71276</a>  | coiled-coil domain containing     | <a href="#">Ccdc57</a>             | 0.975 | -0.636 | 0.544532 | 0.776685 |
| 10868 | 10469289 | <a href="#">NM_008358</a>          | <a href="#">16169</a>  | interleukin 15 receptor, alpha    | <a href="#">Il15ra</a>             | 0.975 | -0.413 | 0.691417 | 0.864541 |
| 10869 | 10345666 | <a href="#">NM_026850</a>          | <a href="#">68833</a>  | phosducin-like 3                  | <a href="#">Pdc13</a>              | 0.975 | -0.759 | 0.471802 | 0.72372  |
| 10870 | 10394498 | <a href="#">NM_172470</a>          | <a href="#">74682</a>  | WD repeat domain 35               | <a href="#">Wdr35</a>              | 0.975 | -1.302 | 0.232859 | 0.503895 |
| 10871 | 10369604 | <a href="#">NM_133672</a>          | <a href="#">30930</a>  | vacuolar protein sorting 26 ho    | <a href="#">Vps26a</a>             | 0.975 | -0.815 | 0.440975 | 0.699945 |
| 10872 | 10542050 | <a href="#">NM_001033464</a>       | <a href="#">381812</a> | EF-hand calcium binding domain    | <a href="#">Efcab4b</a>            | 0.975 | -0.107 | 0.917378 | 0.967481 |
| 10873 | 10360957 | <a href="#">NM_172650</a>          | <a href="#">226823</a> | potassium channel tetramerisat    | <a href="#">Kctd3</a>              | 0.975 | -0.463 | 0.656719 | 0.846325 |
| 10874 | 10525961 | <a href="#">NM_021311</a>          | <a href="#">57749</a>  | piwi-like homolog 1 (Drosophil    | <a href="#">Piwil1</a>             | 0.975 | -0.382 | 0.713655 | 0.874653 |
| 10875 | 10445380 | <a href="#">NM_198608</a>          | <a href="#">224805</a> | alanvl-tRNA svnthesetase 2. mito  | <a href="#">Aars2</a>              | 0.975 | -0.491 | 0.638206 | 0.835923 |

|       |          |                                    |                           |                                |                                    |       |        |          |          |
|-------|----------|------------------------------------|---------------------------|--------------------------------|------------------------------------|-------|--------|----------|----------|
| 10876 | 10370054 | <a href="#">NM_023219</a>          | <a href="#">64454</a>     | solute carrier family 5 (neutr | <a href="#">Slc5a4b</a>            | 0.975 | -0.132 | 0.898767 | 0.960077 |
| 10877 | 10409190 | <a href="#">NM_025495</a>          | <a href="#">66336</a>     | centromere protein P           | <a href="#">Cenpp</a>              | 0.975 | -1.07  | 0.319272 | 0.596377 |
| 10878 | 10444284 | <a href="#">NM_010389</a>          | <a href="#">15002</a>     | histocompatibility 2, O region | <a href="#">H2-Ob</a>              | 0.975 | -0.018 | 0.985744 | 0.994065 |
| 10879 | 10515708 | <a href="#">ENSMUST00000075406</a> | <a href="#">230676</a>    | cDNA sequence BC059842         | <a href="#">BC059842</a>           | 0.975 | -0.056 | 0.956906 | 0.983559 |
| 10880 | 10510681 | <a href="#">NM_008236</a>          | <a href="#">15206</a>     | hairy and enhancer of split 2  | <a href="#">Hes2</a>               | 0.975 | -0.417 | 0.688931 | 0.863319 |
| 10881 | 10383920 | <a href="#">NM_010904</a>          | <a href="#">380684</a>    | neurofilament, heavy polypepti | <a href="#">Nefh</a>               | 0.974 | -0.434 | 0.677055 | 0.856509 |
| 10882 | 10449756 | <a href="#">ENSMUST00000002145</a> | <a href="#">74377</a>     | heat shock transcription facto | <a href="#">Hsf2bp</a>             | 0.974 | -0.542 | 0.604142 | 0.815116 |
| 10883 | 10529671 | <a href="#">NM_001102414</a>       | <a href="#">117591</a>    | solute carrier family 2 (facil | <a href="#">Slc2a9</a>             | 0.974 | -0.343 | 0.741296 | 0.889595 |
| 10884 | 10555885 |                                    |                           |                                |                                    | 0.974 | 0.064  | 0.950548 | 0.980959 |
| 10885 | 10565858 | <a href="#">BC145760</a>           | <a href="#">330602</a>    | predicted gene, EG330602       | <a href="#">EG330602</a>           | 0.974 | -0.133 | 0.897833 | 0.959787 |
| 10886 | 10360985 | <a href="#">NM_001081363</a>       | <a href="#">108000</a>    | centromere protein F           | <a href="#">Cenpf</a>              | 0.974 | -0.677 | 0.519469 | 0.757547 |
| 10887 | 10427657 |                                    |                           |                                |                                    | 0.974 | 0.03   | 0.977006 | 0.990545 |
| 10888 | 10545208 | <a href="#">ENSMUST00000103357</a> | <a href="#">235952</a>    | gene model 189, (NCBI)         | <a href="#">Gm189</a>              | 0.974 | -0.188 | 0.855875 | 0.941748 |
| 10889 | 10556613 | <a href="#">ENSMUST00000068576</a> | <a href="#">67745</a>     | RIKEN cDNA 4930583K01 gene     | <a href="#">4930583K01Rik</a>      | 0.974 | -0.242 | 0.815617 | 0.926149 |
| 10890 | 10505925 |                                    |                           |                                |                                    | 0.974 | -0.456 | 0.661944 | 0.84942  |
| 10891 | 10532169 | <a href="#">NM_172883</a>          | <a href="#">243197</a>    | major facilitator superfamily  | <a href="#">Mfsd7</a>              | 0.974 | -0.223 | 0.829358 | 0.93131  |
| 10892 | 10349922 | <a href="#">NM_031193</a>          | <a href="#">19702</a>     | renin 2 tandem duplication of  | <a href="#">Ren2</a>               | 0.974 | -0.475 | 0.648778 | 0.842046 |
| 10893 | 10394286 | <a href="#">BC067010</a>           | <a href="#">69709</a>     | RIKEN cDNA 2410017P09 gene     | <a href="#">2410017P09Rik</a>      | 0.974 | -0.014 | 0.989446 | 0.995361 |
| 10894 | 10584691 | <a href="#">NM_001081369</a>       | <a href="#">270150</a>    | cDNA sequence BC038167         | <a href="#">BC038167</a>           | 0.974 | -0.387 | 0.710252 | 0.873031 |
| 10895 | 10396383 | <a href="#">BC048389</a>           | <a href="#">625098</a>    | solute carrier family 38, memb | <a href="#">Slc38a6</a>            | 0.974 | -0.319 | 0.758603 | 0.898845 |
| 10896 | 10517263 | <a href="#">BC026808</a>           | <a href="#">76824</a>     | RIKEN cDNA 2410166I05 gene     | <a href="#">2410166I05Rik</a>      | 0.974 | -0.495 | 0.635151 | 0.834242 |
| 10897 | 10551469 | <a href="#">NM_001037957</a>       | <a href="#">13549</a>     | dual-specificity tyrosine-(Y)- | <a href="#">Dyrk1b</a>             | 0.974 | -0.71  | 0.500145 | 0.743152 |
| 10898 | 10390502 | <a href="#">NM_022891</a>          | <a href="#">65019</a>     | ribosomal protein L23          | <a href="#">Rpl23</a>              | 0.974 | -0.736 | 0.484865 | 0.733332 |
| 10899 | 10402721 | <a href="#">NM_028875</a>          | <a href="#">74335</a>     | X-ray repair complementing def | <a href="#">Xrcc3</a>              | 0.974 | -0.192 | 0.853289 | 0.940713 |
| 10900 | 10529468 | <a href="#">BC152332</a>           | <a href="#">78890</a>     | RIKEN cDNA 2310079F23 gene     | <a href="#">2310079F23Rik</a>      | 0.974 | -0.614 | 0.558291 | 0.786038 |
| 10901 | 10600901 | <a href="#">NM_013476</a>          | <a href="#">11835</a>     | androgen receptor              | <a href="#">Ar</a>                 | 0.974 | 0.05   | 0.96175  | 0.985234 |
| 10902 | 10539421 | <a href="#">NM_145571</a>          | <a href="#">232157</a>    | MOB1, Mps One Binder kinase ac | <a href="#">Mobk11b</a>            | 0.974 | -0.712 | 0.49867  | 0.742429 |
| 10903 | 10548788 |                                    |                           |                                |                                    | 0.974 | 0.146  | 0.888068 | 0.955903 |
| 10904 | 10437541 | <a href="#">NM_013796</a>          | <a href="#">27426</a>     | N-acetylglucosamine-1-phosphod | <a href="#">Nagpa</a>              | 0.974 | -0.496 | 0.634753 | 0.833935 |
| 10905 | 10428672 | <a href="#">NM_183089</a>          | <a href="#">72107</a>     | defective in sister chromatid  | <a href="#">Dscc1</a>              | 0.974 | -0.84  | 0.427771 | 0.689074 |
| 10906 | 10413997 | <a href="#">XM_985917</a>          | <a href="#">268729</a>    | gene model 626, (NCBI)         | <a href="#">Gm626</a>              | 0.974 | -0.09  | 0.930604 | 0.972759 |
| 10907 | 10450829 |                                    |                           |                                |                                    | 0.974 | 0.177  | 0.864057 | 0.945829 |
| 10908 | 10464896 | <a href="#">NM_172835</a>          | <a href="#">240518</a>    | pellino 3                      | <a href="#">Peli3</a>              | 0.974 | -0.28  | 0.787034 | 0.912989 |
| 10909 | 10594246 | <a href="#">ENSMUST00000098658</a> | <a href="#">100038496</a> | predicted gene, ENSMUSG0000007 | <a href="#">ENSMUSG00000074256</a> | 0.974 | -0.577 | 0.581351 | 0.800318 |
| 10910 | 10582647 |                                    |                           |                                |                                    | 0.974 | 0.225  | 0.828272 | 0.930848 |
| 10911 | 10534519 | <a href="#">NM_029659</a>          | <a href="#">76571</a>     | serine/threonine/tyrosine inte | <a href="#">Styx11</a>             | 0.974 | -0.69  | 0.511508 | 0.752366 |
| 10912 | 10524345 | <a href="#">NM_009419</a>          | <a href="#">22022</a>     | protein-tyrosine sulfotransfer | <a href="#">Tpst2</a>              | 0.974 | -0.697 | 0.507587 | 0.749509 |
| 10913 | 10556127 | <a href="#">NM_001011742</a>       | <a href="#">257891</a>    | olfactory receptor 479         | <a href="#">Olfr479</a>            | 0.974 | -0.723 | 0.492489 | 0.738472 |
| 10914 | 10522676 | <a href="#">NM_025691</a>          | <a href="#">66661</a>     | signal recognition particle 72 | <a href="#">Srp72</a>              | 0.974 | -0.959 | 0.36877  | 0.639488 |
| 10915 | 10413008 | <a href="#">NM_028428</a>          | <a href="#">73068</a>     | fucosyltransferase 11          | <a href="#">Fut11</a>              | 0.974 | -0.441 | 0.671827 | 0.854391 |
| 10916 | 10548041 | <a href="#">ENSMUST00000100934</a> | <a href="#">100038574</a> | predicted gene, ENSMUSG0000007 | <a href="#">ENSMUSG00000072759</a> | 0.974 | 0.062  | 0.952061 | 0.981385 |
| 10917 | 10429048 | <a href="#">NM_010953</a>          | <a href="#">18256</a>     | otoconin 90                    | <a href="#">Oc90</a>               | 0.974 | -0.135 | 0.896164 | 0.95935  |
| 10918 | 10552369 | <a href="#">NM_145581</a>          | <a href="#">233186</a>    | sialic acid binding Ig-like le | <a href="#">Siglec5</a>            | 0.974 | -0.406 | 0.696572 | 0.86683  |
| 10919 | 10468877 |                                    |                           |                                |                                    | 0.974 | -0.631 | 0.547287 | 0.778305 |
| 10920 | 10602893 |                                    |                           |                                |                                    | 0.974 | -0.307 | 0.767281 | 0.903106 |
| 10921 | 10424340 | <a href="#">NM_023172</a>          | <a href="#">66218</a>     | NADH dehydrogenase (ubiquinone | <a href="#">Ndufb9</a>             | 0.974 | -1.048 | 0.328614 | 0.604982 |
| 10922 | 10383133 | <a href="#">NM_178743</a>          | <a href="#">268512</a>    | solute carrier family 26, memb | <a href="#">Slc26a11</a>           | 0.974 | -0.427 | 0.681795 | 0.859366 |
| 10923 | 10499372 | <a href="#">NM_178696</a>          | <a href="#">229517</a>    | solute carrier family 25, memb | <a href="#">Slc25a44</a>           | 0.974 | -0.961 | 0.367725 | 0.638723 |
| 10924 | 10590529 | <a href="#">NM_025339</a>          | <a href="#">66079</a>     | transmembrane protein 42       | <a href="#">Tmem42</a>             | 0.974 | -0.635 | 0.545103 | 0.77708  |
| 10925 | 10371589 | <a href="#">ENSMUST00000099388</a> | <a href="#">100038372</a> | predicted gene, ENSMUSG0000007 | <a href="#">ENSMUSG00000074809</a> | 0.974 | -0.716 | 0.496537 | 0.74102  |

|       |          |                                    |                           |                                |                                    |       |        |          |          |
|-------|----------|------------------------------------|---------------------------|--------------------------------|------------------------------------|-------|--------|----------|----------|
| 10926 | 10476058 | <a href="#">NM_177726</a>          | <a href="#">241636</a>    | transglutaminase 6             | <a href="#">Tgm6</a>               | 0.974 | -0.282 | 0.785954 | 0.912636 |
| 10927 | 10410687 |                                    |                           |                                |                                    | 0.974 | -0.414 | 0.691009 | 0.864447 |
| 10928 | 10366541 | <a href="#">NM_146242</a>          | <a href="#">237560</a>    | leucine rich repeat containing | <a href="#">Lrrc10</a>             | 0.974 | -0.051 | 0.960588 | 0.985069 |
| 10929 | 10505064 | <a href="#">NM_028053</a>          | <a href="#">52076</a>     | transmembrane protein 38B      | <a href="#">Tmem38b</a>            | 0.974 | -0.505 | 0.628646 | 0.830964 |
| 10930 | 10444595 | <a href="#">NM_030597</a>          | <a href="#">27756</a>     | LSM2 homolog, U6 small nuclear | <a href="#">Lsm2</a>               | 0.974 | -0.734 | 0.486013 | 0.734018 |
| 10931 | 10378445 | <a href="#">NM_001013784</a>       | <a href="#">432582</a>    | RIKEN cDNA E130309D14 gene     | <a href="#">E130309D14Rik</a>      | 0.974 | -0.075 | 0.941937 | 0.977644 |
| 10932 | 10419296 | <a href="#">NM_172598</a>          | <a href="#">218973</a>    | WD repeat and HMG-box DNA bind | <a href="#">Wdhd1</a>              | 0.974 | -0.558 | 0.593671 | 0.808175 |
| 10933 | 10482791 | <a href="#">XM_001477205</a>       | <a href="#">271788</a>    | similar to Charged multivesicu | <a href="#">LOC271788</a>          | 0.974 | -0.459 | 0.659996 | 0.848652 |
| 10934 | 10552532 | <a href="#">NM_019928</a>          | <a href="#">56640</a>     | kallikrein related-peptidase 4 | <a href="#">Klk4</a>               | 0.974 | -0.103 | 0.920915 | 0.968408 |
| 10935 | 10419471 | <a href="#">NM_009351</a>          | <a href="#">21745</a>     | telomerase associated protein  | <a href="#">Tep1</a>               | 0.974 | -0.203 | 0.84452  | 0.936859 |
| 10936 | 10356143 | <a href="#">XR_030656</a>          | <a href="#">100044526</a> | similar to mitochondrial ribos | <a href="#">LOC100044526</a>       | 0.974 | -1.04  | 0.331943 | 0.608173 |
| 10937 | 10517465 | <a href="#">NM_133872</a>          | <a href="#">99982</a>     | amine oxidase (flavin containi | <a href="#">Aof2</a>               | 0.974 | -0.849 | 0.423265 | 0.685524 |
| 10938 | 10525733 | <a href="#">NM_030241</a>          | <a href="#">67956</a>     | SET domain containing (lysine  | <a href="#">Setd8</a>              | 0.974 | -0.818 | 0.439327 | 0.698588 |
| 10939 | 10497582 | <a href="#">BC119391</a>           | <a href="#">208613</a>    | RIKEN cDNA E030011K20 gene     | <a href="#">E030011K20Rik</a>      | 0.974 | -0.247 | 0.811538 | 0.923946 |
| 10940 | 10478799 | <a href="#">NM_023565</a>          | <a href="#">110750</a>    | chromosome segregation 1-like  | <a href="#">Cse1l</a>              | 0.974 | -0.859 | 0.417773 | 0.680539 |
| 10941 | 10453318 | <a href="#">NM_031884</a>          | <a href="#">27409</a>     | ATP-binding cassette, sub-fami | <a href="#">Abcg5</a>              | 0.974 | 0.2    | 0.847117 | 0.938142 |
| 10942 | 10450424 |                                    |                           |                                |                                    | 0.974 | -0.269 | 0.795373 | 0.916955 |
| 10943 | 10370508 | <a href="#">ENSMUST00000069431</a> | <a href="#">791283</a>    | predicted gene, ENSMUSG0000005 | <a href="#">ENSMUSG0000005704</a>  | 0.974 | -0.215 | 0.835757 | 0.933505 |
| 10944 | 10362633 | <a href="#">NM_011264</a>          | <a href="#">19714</a>     | REV3-like, catalytic subunit o | <a href="#">Rev3l</a>              | 0.974 | -0.554 | 0.596231 | 0.809783 |
| 10945 | 10370559 | <a href="#">NM_027422</a>          | <a href="#">70427</a>     | mesoderm induction early respo | <a href="#">Mier2</a>              | 0.974 | -0.475 | 0.648643 | 0.841922 |
| 10946 | 10493343 |                                    |                           |                                |                                    | 0.974 | -0.331 | 0.749927 | 0.894399 |
| 10947 | 10441899 | <a href="#">BC107382</a>           | <a href="#">635895</a>    | predicted gene, EG635895       | <a href="#">EG635895</a>           | 0.974 | 0.079  | 0.938933 | 0.976218 |
| 10948 | 10488266 | <a href="#">NM_172859</a>          | <a href="#">241688</a>    | RIKEN cDNA 6330439K17 gene     | <a href="#">6330439K17Rik</a>      | 0.974 | -0.449 | 0.666711 | 0.851355 |
| 10949 | 10516943 | <a href="#">NM_007512</a>          | <a href="#">11983</a>     | ATPase inhibitory factor 1     | <a href="#">Atpif1</a>             | 0.973 | -0.953 | 0.371473 | 0.64202  |
| 10950 | 10498204 | <a href="#">ENSMUST00000062651</a> | <a href="#">791319</a>    | predicted gene, ENSMUSG0000004 | <a href="#">ENSMUSG00000048888</a> | 0.973 | -0.385 | 0.711547 | 0.873605 |
| 10951 | 10453544 | <a href="#">NM_176917</a>          | <a href="#">76781</a>     | methyltransferase like 4       | <a href="#">Mettl4</a>             | 0.973 | -1.16  | 0.282913 | 0.55817  |
| 10952 | 10597477 | <a href="#">NM_175380</a>          | <a href="#">333433</a>    | glycerol-3-phosphate dehydroge | <a href="#">Gpd1l</a>              | 0.973 | -0.66  | 0.529657 | 0.764911 |
| 10953 | 10360674 | <a href="#">NM_013729</a>          | <a href="#">27217</a>     | Mix1 homeobox-like 1 (Xenopus  | <a href="#">Mix1l</a>              | 0.973 | -0.213 | 0.837419 | 0.934421 |
| 10954 | 10350985 | <a href="#">NM_025474</a>          | <a href="#">64659</a>     | mitochondrial ribosomal protei | <a href="#">Mrps14</a>             | 0.973 | -1.095 | 0.308612 | 0.585228 |
| 10955 | 10462587 | <a href="#">NM_029682</a>          | <a href="#">76630</a>     | Stam binding protein like 1    | <a href="#">Stambpl1</a>           | 0.973 | -0.504 | 0.628968 | 0.831181 |
| 10956 | 10428338 | <a href="#">NM_022722</a>          | <a href="#">64705</a>     | dihydropyrimidinase            | <a href="#">Dpys</a>               | 0.973 | -0.415 | 0.690141 | 0.864031 |
| 10957 | 10557591 | <a href="#">NM_008400</a>          | <a href="#">16408</a>     | integrin alpha L               | <a href="#">Itgal</a>              | 0.973 | -0.097 | 0.925556 | 0.970539 |
| 10958 | 10433073 | <a href="#">ENSMUST00000100166</a> | <a href="#">100038459</a> | predicted gene, ENSMUSG0000007 | <a href="#">ENSMUSG00000075396</a> | 0.973 | -0.172 | 0.86821  | 0.947187 |
| 10959 | 10500091 | <a href="#">NM_027013</a>          | <a href="#">69269</a>     | sodium channel modifier 1      | <a href="#">Scnm1</a>              | 0.973 | -0.484 | 0.642642 | 0.838146 |
| 10960 | 10532944 | <a href="#">BC035300</a>           | <a href="#">109154</a>    | RIKEN cDNA 2410014A08 gene     | <a href="#">2410014A08Rik</a>      | 0.973 | -0.572 | 0.584615 | 0.802272 |
| 10961 | 10526487 | <a href="#">NM_028070</a>          | <a href="#">72041</a>     | alkB, alkylation repair homolo | <a href="#">Alkbh4</a>             | 0.973 | -0.549 | 0.599369 | 0.811907 |
| 10962 | 10601152 | <a href="#">NM_172932</a>          | <a href="#">245537</a>    | neuregulin 3                   | <a href="#">Nlgn3</a>              | 0.973 | -0.533 | 0.609812 | 0.81845  |
| 10963 | 10419611 | <a href="#">NM_033618</a>          | <a href="#">114741</a>    | suppressor of Ty 16 homolog (S | <a href="#">Supt16h</a>            | 0.973 | -0.78  | 0.460254 | 0.71495  |
| 10964 | 10560983 | <a href="#">NM_207677</a>          | <a href="#">67379</a>     | death effector domain-containi | <a href="#">Dedd2</a>              | 0.973 | -0.511 | 0.62473  | 0.828896 |
| 10965 | 10365870 | <a href="#">NM_011629</a>          | <a href="#">22025</a>     | nuclear receptor subfamily 2,  | <a href="#">Nr2c1</a>              | 0.973 | -0.262 | 0.800999 | 0.919467 |
| 10966 | 10383850 |                                    |                           |                                |                                    | 0.973 | -0.457 | 0.660816 | 0.848863 |
| 10967 | 10379543 | <a href="#">NM_023438</a>          | <a href="#">270893</a>    | transmembrane protein 132E     | <a href="#">Tmem132e</a>           | 0.973 | -0.458 | 0.660411 | 0.848652 |
| 10968 | 10530910 | <a href="#">NM_172712</a>          | <a href="#">231380</a>    | ubiquitin-like modifier activa | <a href="#">Uba6</a>               | 0.973 | -1.194 | 0.270195 | 0.545029 |
| 10969 | 10440704 | <a href="#">NM_183296</a>          | <a href="#">71369</a>     | keratin associated protein 16- | <a href="#">Krtap16-10</a>         | 0.973 | -0.527 | 0.614158 | 0.821467 |
| 10970 | 10392152 | <a href="#">NM_133199</a>          | <a href="#">110880</a>    | sodium channel, voltage-gated, | <a href="#">Scn4a</a>              | 0.973 | -0.673 | 0.521784 | 0.75888  |
| 10971 | 10420338 | <a href="#">NM_025682</a>          | <a href="#">66645</a>     | paraspeckle protein 1          | <a href="#">Pspe1</a>              | 0.973 | -1.033 | 0.335054 | 0.610618 |
| 10972 | 10552708 | <a href="#">NM_008422</a>          | <a href="#">16504</a>     | potassium voltage gated channe | <a href="#">Kcnc3</a>              | 0.973 | -0.494 | 0.636185 | 0.834785 |
| 10973 | 10405248 | <a href="#">NM_001010973</a>       | <a href="#">15466</a>     | histamine receptor H2          | <a href="#">Hrh2</a>               | 0.973 | -0.194 | 0.851507 | 0.940193 |
| 10974 | 10576235 | <a href="#">NM_007876</a>          | <a href="#">13479</a>     | dipeptidase 1 (renal)          | <a href="#">Dpep1</a>              | 0.973 | -0.375 | 0.718576 | 0.877128 |
| 10975 | 10527740 | <a href="#">NM_012401</a>          | <a href="#">12722</a>     | channel protein 1              | <a href="#">Clca1</a>              | 0.973 | -0.025 | 0.972102 | 0.988528 |

|       |          |                                    |                           |                                |                               |       |        |          |          |
|-------|----------|------------------------------------|---------------------------|--------------------------------|-------------------------------|-------|--------|----------|----------|
| 10975 | 10537142 | <a href="#">NM_015491</a>          | <a href="#">12723</a>     | chloride channel 1             | <a href="#">Clcn1</a>         | 0.973 | -0.053 | 0.973193 | 0.968326 |
| 10976 | 10593260 | <a href="#">NM_172922</a>          | <a href="#">244859</a>    | ankyrin repeat and kinase doma | <a href="#">Ankk1</a>         | 0.973 | -0.219 | 0.83256  | 0.932679 |
| 10977 | 10366597 | <a href="#">NM_028736</a>          | <a href="#">74053</a>     | glutamate receptor interacting | <a href="#">Grip1</a>         | 0.973 | -0.991 | 0.353595 | 0.626322 |
| 10978 | 10396055 | <a href="#">NM_027614</a>          | <a href="#">70948</a>     | WD repeat domain 20b           | <a href="#">Wdr20b</a>        | 0.973 | -0.401 | 0.699687 | 0.868422 |
| 10979 | 10488020 | <a href="#">NM_029148</a>          | <a href="#">52837</a>     | thioredoxin domain containing  | <a href="#">Txnrc13</a>       | 0.973 | -0.592 | 0.57216  | 0.796219 |
| 10980 | 10451597 | <a href="#">ENSMUST00000113300</a> | <a href="#">381104</a>    | gene model 939, (NCBI)         | <a href="#">Gm939</a>         | 0.973 | -0.49  | 0.638582 | 0.835923 |
| 10981 | 10499427 | <a href="#">NM_181817</a>          | <a href="#">242093</a>    | relaxin family peptide recepto | <a href="#">Rxfp4</a>         | 0.973 | -0.738 | 0.483781 | 0.732322 |
| 10982 | 10372023 | <a href="#">BC092352</a>           | <a href="#">215472</a>    | predicted gene, EG215472       | <a href="#">EG215472</a>      | 0.973 | -0.137 | 0.894778 | 0.958505 |
| 10983 | 10518855 |                                    |                           |                                |                               | 0.973 | -0.907 | 0.393819 | 0.661654 |
| 10984 | 10570758 | <a href="#">NM_139223</a>          | <a href="#">246083</a>    | defensin beta 13               | <a href="#">Defb13</a>        | 0.973 | 0.037  | 0.971312 | 0.988148 |
| 10985 | 10455104 | <a href="#">NM_053140</a>          | <a href="#">93886</a>     | protocadherin beta 15          | <a href="#">Pcdhb15</a>       | 0.973 | 0.198  | 0.848571 | 0.938624 |
| 10986 | 10493864 | <a href="#">NM_011470</a>          | <a href="#">20758</a>     | small proline-rich protein 2D  | <a href="#">Sprr2d</a>        | 0.973 | -0.063 | 0.951492 | 0.981144 |
| 10987 | 10555818 |                                    |                           |                                |                               | 0.973 | -0.341 | 0.743072 | 0.890574 |
| 10988 | 10568399 | <a href="#">NM_009383</a>          | <a href="#">21843</a>     | Tia1 cytotoxic granule-associa | <a href="#">Tia1</a>          | 0.973 | -0.41  | 0.693486 | 0.865698 |
| 10989 | 10491385 | <a href="#">NM_019673</a>          | <a href="#">56456</a>     | actin-like 6A                  | <a href="#">Actl6a</a>        | 0.973 | -0.677 | 0.519248 | 0.757488 |
| 10990 | 10520867 |                                    |                           |                                |                               | 0.973 | 0.039  | 0.970127 | 0.987786 |
| 10991 | 10576175 | <a href="#">NM_007662</a>          | <a href="#">12555</a>     | cadherin 15                    | <a href="#">Cdh15</a>         | 0.973 | 0.032  | 0.975433 | 0.989757 |
| 10992 | 10478594 | <a href="#">NM_008906</a>          | <a href="#">19025</a>     | cathepsin A                    | <a href="#">Ctsa</a>          | 0.973 | -1.264 | 0.245453 | 0.518491 |
| 10993 | 10604671 |                                    |                           |                                |                               | 0.973 | -0.661 | 0.529133 | 0.76441  |
| 10994 | 10589756 | <a href="#">NM_175266</a>          | <a href="#">77781</a>     | EPM2A (laforin) interacting pr | <a href="#">Epm2aip1</a>      | 0.973 | -1.204 | 0.266603 | 0.541262 |
| 10995 | 10446172 | <a href="#">NM_144858</a>          | <a href="#">224907</a>    | dihydrouridine synthase 3-like | <a href="#">Dus3l</a>         | 0.973 | -0.729 | 0.488847 | 0.736349 |
| 10996 | 10393879 | <a href="#">AK047224</a>           | <a href="#">17134</a>     | v-maf musculoaponeurotic fibro | <a href="#">Mafg</a>          | 0.973 | -0.092 | 0.929205 | 0.972148 |
| 10997 | 10567010 | <a href="#">NM_015814</a>          | <a href="#">50781</a>     | dickkopf homolog 3 (Xenopus la | <a href="#">Dkk3</a>          | 0.973 | -0.329 | 0.75169  | 0.895263 |
| 10998 | 10586079 | <a href="#">NM_176922</a>          | <a href="#">319480</a>    | integrin, alpha 11             | <a href="#">Itga11</a>        | 0.973 | -0.187 | 0.856471 | 0.941981 |
| 10999 | 10384715 | <a href="#">NR_004857</a>          | <a href="#">100134990</a> | selenoprotein K pseudogene     | <a href="#">LOC100134990</a>  | 0.973 | -0.288 | 0.78131  | 0.911076 |
| 11000 | 10394685 | <a href="#">NM_008747</a>          | <a href="#">18217</a>     | neurotensin receptor 2         | <a href="#">Ntr2</a>          | 0.973 | -0.426 | 0.682414 | 0.859763 |
| 11001 | 10603860 | <a href="#">NM_008823</a>          | <a href="#">18636</a>     | complement factor properdin    | <a href="#">Cfp</a>           | 0.973 | -0.4   | 0.700919 | 0.868962 |
| 11002 | 10440406 | <a href="#">NM_173440</a>          | <a href="#">268903</a>    | nuclear receptor interacting p | <a href="#">Nrip1</a>         | 0.973 | -0.597 | 0.569053 | 0.793724 |
| 11003 | 10375503 | <a href="#">NM_053166</a>          | <a href="#">94089</a>     | tripartite motif-containing 7  | <a href="#">Trim7</a>         | 0.973 | -0.218 | 0.833536 | 0.932911 |
| 11004 | 10463904 | <a href="#">XR_034741</a>          | <a href="#">668536</a>    | similar to ribosomal protein L | <a href="#">LOC668536</a>     | 0.973 | -0.725 | 0.491092 | 0.737687 |
| 11005 | 10381408 | <a href="#">NM_027320</a>          | <a href="#">70110</a>     | interferon-induced protein 35  | <a href="#">Ifi35</a>         | 0.973 | -0.587 | 0.575036 | 0.797076 |
| 11006 | 10480139 | <a href="#">NM_153155</a>          | <a href="#">227580</a>    | C1q-like 3                     | <a href="#">Clql3</a>         | 0.973 | -0.282 | 0.786159 | 0.912775 |
| 11007 | 10594754 | <a href="#">NM_022378</a>          | <a href="#">64290</a>     | forkhead box B1                | <a href="#">Foxb1</a>         | 0.973 | -1.088 | 0.311743 | 0.58828  |
| 11008 | 10567863 | <a href="#">NM_009844</a>          | <a href="#">12478</a>     | CD19 antigen                   | <a href="#">Cd19</a>          | 0.973 | -0.498 | 0.633625 | 0.833377 |
| 11009 | 10509168 | <a href="#">NM_177733</a>          | <a href="#">242705</a>    | E2F transcription factor 2     | <a href="#">E2f2</a>          | 0.973 | -0.795 | 0.452134 | 0.708922 |
| 11010 | 10505839 |                                    |                           |                                |                               | 0.973 | -0.815 | 0.441341 | 0.700287 |
| 11011 | 10493984 | <a href="#">ENSMUST00000064257</a> | <a href="#">99681</a>     | trichohyalin                   | <a href="#">Tchh</a>          | 0.973 | -0.212 | 0.837721 | 0.934421 |
| 11012 | 10549899 | <a href="#">NM_146179</a>          | <a href="#">232854</a>    | zinc finger protein 418        | <a href="#">Zfp418</a>        | 0.973 | -0.46  | 0.659384 | 0.848209 |
| 11013 | 10447602 | <a href="#">NM_009510</a>          | <a href="#">22350</a>     | ezrin                          | <a href="#">Ezr</a>           | 0.973 | -0.61  | 0.560654 | 0.78784  |
| 11014 | 10424287 | <a href="#">XM_977315</a>          | <a href="#">631797</a>    | fer-1-like 6 (C. elegans)      | <a href="#">Fer16</a>         | 0.973 | -0.589 | 0.573988 | 0.797076 |
| 11015 | 10390622 | <a href="#">NM_001033537</a>       | <a href="#">320655</a>    | per1-like domain containing 1  | <a href="#">Perld1</a>        | 0.973 | -0.288 | 0.78108  | 0.911042 |
| 11016 | 10546396 | <a href="#">NM_025578</a>          | <a href="#">64658</a>     | mitochondrial ribosomal protei | <a href="#">Mrps25</a>        | 0.973 | -0.614 | 0.557948 | 0.785803 |
| 11017 | 10565530 |                                    |                           |                                |                               | 0.973 | -0.201 | 0.84604  | 0.937284 |
| 11018 | 10393106 | <a href="#">NM_172570</a>          | <a href="#">217333</a>    | tripartite motif-containing 47 | <a href="#">Trim47</a>        | 0.973 | -0.424 | 0.683705 | 0.860022 |
| 11019 | 10395293 | <a href="#">NM_001033436</a>       | <a href="#">380753</a>    | ataxin 7-like 1                | <a href="#">Atxn7l1</a>       | 0.973 | 0.019  | 0.985581 | 0.993996 |
| 11020 | 10585767 | <a href="#">NM_001122873</a>       | <a href="#">69459</a>     | ubiquitin-like 7 (bone marrow  | <a href="#">Ubl7</a>          | 0.973 | -0.932 | 0.381651 | 0.651394 |
| 11021 | 10450845 | <a href="#">NM_010814</a>          | <a href="#">17441</a>     | myelin oligodendrocyte glycopr | <a href="#">Mog</a>           | 0.973 | -0.193 | 0.85259  | 0.940531 |
| 11022 | 10600821 | <a href="#">XM_994723</a>          | <a href="#">631319</a>    | predicted gene, EG631319       | <a href="#">EG631319</a>      | 0.973 | -0.033 | 0.974931 | 0.98939  |
| 11023 | 10353792 | <a href="#">ENSMUST00000062557</a> | <a href="#">73589</a>     | RIKEN cDNA 1700101119 gene     | <a href="#">1700101119Rik</a> | 0.973 | -0.299 | 0.773733 | 0.906763 |
| 11024 | 10462346 | <a href="#">NM_021525</a>          | <a href="#">59028</a>     | RNA terminal phosphate cyclase | <a href="#">Rcl1</a>          | 0.973 | -0.536 | 0.60837  | 0.817693 |
| 11025 | 10372656 | <a href="#">NM_001013391</a>       | <a href="#">432508</a>    | cleavage and polyadenylation s | <a href="#">Cpsf6</a>         | 0.973 | -0.274 | 0.791817 | 0.915223 |
| 11026 | 10419607 | <a href="#">NM_016884</a>          | <a href="#">15381</a>     | heterogeneous nuclear ribonucl | <a href="#">Hnrmpc</a>        | 0.973 | -0.943 | 0.376072 | 0.646162 |
| 11027 | 10415606 |                                    |                           |                                |                               | 0.973 | -0.677 | 0.519631 | 0.757547 |
| 11028 | 10383061 | <a href="#">NM_175430</a>          | <a href="#">207607</a>    | coiled-coil domain containing  | <a href="#">Ccdc40</a>        | 0.973 | -0.43  | 0.679876 | 0.857866 |
| 11029 | 10423733 | <a href="#">AK122302</a>           | <a href="#">666173</a>    | vacuolar protein sorting 13B ( | <a href="#">Vps13b</a>        | 0.972 | -0.218 | 0.833195 | 0.932811 |
| 11030 | 10432278 | <a href="#">NM_001013741</a>       | <a href="#">13199</a>     | dendrin                        | <a href="#">Ddn</a>           | 0.972 | 0.262  | 0.8003   | 0.919317 |
| 11031 | 10367515 |                                    |                           |                                |                               | 0.972 | -0.841 | 0.427372 | 0.688641 |

|       |          |                                    |                           |                                                          |                                    |       |        |          |          |
|-------|----------|------------------------------------|---------------------------|----------------------------------------------------------|------------------------------------|-------|--------|----------|----------|
| 11032 | 10387274 | <a href="#">NM_008192</a>          | <a href="#">14919</a>     | guanylate cyclase 2e                                     | <a href="#">Gucy2e</a>             | 0.972 | -0.181 | 0.861029 | 0.94412  |
| 11033 | 10428613 | <a href="#">ENSMUST00000054380</a> | <a href="#">383032</a>    | predicted gene, EG383032                                 | <a href="#">EG383032</a>           | 0.972 | -0.981 | 0.358349 | 0.630567 |
| 11034 | 10562563 | <a href="#">NM_007633</a>          | <a href="#">12447</a>     | cyclin E1                                                | <a href="#">Cne1</a>               | 0.972 | -0.451 | 0.665012 | 0.850739 |
| 11035 | 10554323 |                                    |                           |                                                          |                                    | 0.972 | 0.047  | 0.963874 | 0.985834 |
| 11036 | 10588722 | <a href="#">NM_028369</a>          | <a href="#">72825</a>     | MON1 homolog A (yeast)                                   | <a href="#">Mon1a</a>              | 0.972 | -0.925 | 0.384884 | 0.654157 |
| 11037 | 10441917 | <a href="#">XR_033311</a>          | <a href="#">664856</a>    | similar to ribosomal protein                             | <a href="#">LOC664856</a>          | 0.972 | -1.573 | 0.158395 | 0.405262 |
| 11038 | 10565587 |                                    |                           |                                                          |                                    | 0.972 | -0.309 | 0.765832 | 0.902563 |
| 11039 | 10429199 |                                    |                           |                                                          |                                    | 0.972 | -0.442 | 0.671359 | 0.854195 |
| 11040 | 10378793 | <a href="#">NM_025655</a>          | <a href="#">66601</a>     | transmembrane and immunoglobulin ring finger protein 214 | <a href="#">Tmigd1</a>             | 0.972 | -0.4   | 0.700997 | 0.868962 |
| 11041 | 10593103 | <a href="#">NM_178709</a>          | <a href="#">235315</a>    | ring finger protein 214                                  | <a href="#">Rnf214</a>             | 0.972 | -0.808 | 0.444932 | 0.703375 |
| 11042 | 10458938 | <a href="#">XR_033768</a>          | <a href="#">667360</a>    | similar to High mobility group                           | <a href="#">LOC667360</a>          | 0.972 | -0.9   | 0.397158 | 0.664239 |
| 11043 | 10451604 | <a href="#">NM_010783</a>          | <a href="#">17240</a>     | MyoD family inhibitor                                    | <a href="#">Mdfi</a>               | 0.972 | -0.558 | 0.593865 | 0.808283 |
| 11044 | 10454332 | <a href="#">NM_021448</a>          | <a href="#">58523</a>     | elongation protein 2 homolog (                           | <a href="#">Elp2</a>               | 0.972 | -0.44  | 0.672602 | 0.854651 |
| 11045 | 10428068 | <a href="#">NM_001085421</a>       | <a href="#">239364</a>    | testis-specific protein, Y-enc                           | <a href="#">Tspy15</a>             | 0.972 | 0.187  | 0.857065 | 0.942404 |
| 11046 | 10361135 | <a href="#">ENSMUST00000069573</a> | <a href="#">74265</a>     | RIKEN cDNA 1700034H15 gene                               | <a href="#">1700034H15Rik</a>      | 0.972 | -0.766 | 0.46807  | 0.720506 |
| 11047 | 10428426 | <a href="#">NM_176998</a>          | <a href="#">319613</a>    | RIKEN cDNA 5730410E15 gene                               | <a href="#">5730410E15Rik</a>      | 0.972 | -0.73  | 0.488478 | 0.736112 |
| 11048 | 10543952 | <a href="#">ENSMUST00000101535</a> | <a href="#">319472</a>    | RIKEN cDNA 9330158H04 gene                               | <a href="#">9330158H04Rik</a>      | 0.972 | -0.308 | 0.76664  | 0.902924 |
| 11049 | 10567361 | <a href="#">NM_001024138</a>       | <a href="#">209776</a>    | G protein-coupled receptor 139                           | <a href="#">Gpr139</a>             | 0.972 | -0.363 | 0.727081 | 0.881698 |
| 11050 | 10560826 | <a href="#">NM_020262</a>          | <a href="#">56869</a>     | zinc finger protein 109                                  | <a href="#">Zfp109</a>             | 0.972 | -0.674 | 0.521417 | 0.758794 |
| 11051 | 10552406 | <a href="#">NM_024253</a>          | <a href="#">72310</a>     | natural killer cell group 7 se                           | <a href="#">Nkg7</a>               | 0.972 | -0.468 | 0.6535   | 0.844695 |
| 11052 | 10437590 | <a href="#">NM_025821</a>          | <a href="#">52502</a>     | calcium regulated heat stable                            | <a href="#">Carhsp1</a>            | 0.972 | -0.603 | 0.564892 | 0.790912 |
| 11053 | 10476935 | <a href="#">NM_001085521</a>       | <a href="#">433485</a>    | predicted gene, OTTMUSG0000001                           | <a href="#">OTTMUSG00000015750</a> | 0.972 | -0.204 | 0.843873 | 0.936634 |
| 11054 | 10522944 | <a href="#">XR_004645</a>          | <a href="#">674405</a>    | similar to semaphorin 3A                                 | <a href="#">LOC674405</a>          | 0.972 | -0.307 | 0.767845 | 0.903568 |
| 11055 | 10458645 | <a href="#">NM_028392</a>          | <a href="#">72930</a>     | protein phosphatase 2 (formerl                           | <a href="#">Ppp2r2b</a>            | 0.972 | -0.205 | 0.843545 | 0.936586 |
| 11056 | 10591988 | <a href="#">NM_001024139</a>       | <a href="#">235130</a>    | a disintegrin-like and metallo                           | <a href="#">Adamts15</a>           | 0.972 | -0.316 | 0.761175 | 0.900379 |
| 11057 | 10521057 | <a href="#">NM_021500</a>          | <a href="#">59003</a>     | macrophage erythroblast attach                           | <a href="#">Maea</a>               | 0.972 | -0.858 | 0.418649 | 0.681283 |
| 11058 | 10582599 | <a href="#">NM_172288</a>          | <a href="#">234865</a>    | nucleoporin 133                                          | <a href="#">Nup133</a>             | 0.972 | -0.826 | 0.435158 | 0.695306 |
| 11059 | 10559324 | <a href="#">XM_146165</a>          | <a href="#">244239</a>    | gene model 498, (NCBI)                                   | <a href="#">Gm498</a>              | 0.972 | -0.049 | 0.962462 | 0.985405 |
| 11060 | 10589698 | <a href="#">AK086953</a>           | <a href="#">791282</a>    | predicted gene, ENSMUSG0000005                           | <a href="#">ENSMUSG00000057802</a> | 0.972 | -0.074 | 0.943233 | 0.977948 |
| 11061 | 10526345 | <a href="#">NM_145414</a>          | <a href="#">100609</a>    | NOL1/NOP2/Sun domain family, m                           | <a href="#">Nsun5</a>              | 0.972 | -0.455 | 0.662821 | 0.84989  |
| 11062 | 10550877 | <a href="#">NM_008433</a>          | <a href="#">16534</a>     | potassium intermediate/small c                           | <a href="#">Kcnn4</a>              | 0.972 | -0.377 | 0.717095 | 0.876228 |
| 11063 | 10385114 | <a href="#">NM_023907</a>          | <a href="#">14233</a>     | forkhead box II                                          | <a href="#">Foxi1</a>              | 0.972 | -0.388 | 0.709278 | 0.87278  |
| 11064 | 10531338 |                                    |                           |                                                          |                                    | 0.972 | 0.118  | 0.908905 | 0.963765 |
| 11065 | 10428366 | <a href="#">ENSMUST00000100702</a> | <a href="#">100038501</a> | predicted gene, ENSMUSG0000007                           | <a href="#">ENSMUSG00000072614</a> | 0.972 | -0.494 | 0.635849 | 0.83464  |
| 11066 | 10592061 | <a href="#">NM_010605</a>          | <a href="#">16521</a>     | potassium inwardly-rectifying                            | <a href="#">Kcnj5</a>              | 0.972 | -0.705 | 0.502718 | 0.745562 |
| 11067 | 10353891 | <a href="#">NM_026241</a>          | <a href="#">109346</a>    | ankyrin repeat domain 39                                 | <a href="#">Ankrd39</a>            | 0.972 | -0.158 | 0.879086 | 0.952124 |
| 11068 | 10465831 | <a href="#">BC027679</a>           | <a href="#">67531</a>     | RIKEN cDNA 5730408K05 gene                               | <a href="#">5730408K05Rik</a>      | 0.972 | -0.537 | 0.607158 | 0.817118 |
| 11069 | 10424245 | <a href="#">NM_173862</a>          | <a href="#">239463</a>    | cDNA sequence BC030396                                   | <a href="#">BC030396</a>           | 0.972 | -0.071 | 0.945523 | 0.97847  |
| 11070 | 10575609 | <a href="#">NM_001037665</a>       | <a href="#">22640</a>     | zinc finger protein 1                                    | <a href="#">Zfp1</a>               | 0.972 | -0.787 | 0.456395 | 0.712554 |
| 11071 | 10598872 | <a href="#">NM_145627</a>          | <a href="#">236732</a>    | RNA binding motif protein 10                             | <a href="#">Rbm10</a>              | 0.972 | -0.586 | 0.575601 | 0.797076 |
| 11072 | 10386416 | <a href="#">NM_001011789</a>       | <a href="#">257962</a>    | olfactory receptor 222                                   | <a href="#">Olfr222</a>            | 0.972 | -0.501 | 0.631556 | 0.832548 |
| 11073 | 10495625 | <a href="#">NM_170778</a>          | <a href="#">99586</a>     | dihydropyrimidine dehydrogenas                           | <a href="#">Dpyd</a>               | 0.972 | -0.176 | 0.865376 | 0.946195 |
| 11074 | 10346799 | <a href="#">NM_017480</a>          | <a href="#">54167</a>     | inducible T-cell co-stimulator                           | <a href="#">Icos</a>               | 0.972 | -0.201 | 0.846034 | 0.937284 |
| 11075 | 10522716 | <a href="#">NM_153798</a>          | <a href="#">231329</a>    | polymerase (RNA) II (DNA direc                           | <a href="#">Polr2b</a>             | 0.972 | -0.951 | 0.372215 | 0.642563 |
| 11076 | 10376690 | <a href="#">NM_008502</a>          | <a href="#">16897</a>     | lethal giant larvae homolog 1                            | <a href="#">Lig11</a>              | 0.972 | -0.536 | 0.60826  | 0.817612 |
| 11077 | 10449839 | <a href="#">NM_019774</a>          | <a href="#">56399</a>     | A kinase (PRKA) anchor protein                           | <a href="#">Akap8</a>              | 0.972 | -0.896 | 0.399069 | 0.665345 |
| 11078 | 10472321 | <a href="#">NM_033552</a>          | <a href="#">94229</a>     | solute carrier family 4, sodiu                           | <a href="#">Slc4a10</a>            | 0.972 | -0.192 | 0.853386 | 0.940713 |
| 11079 | 10459912 | <a href="#">NM_175028</a>          | <a href="#">240442</a>    | ADNP homeobox 2                                          | <a href="#">Adnp2</a>              | 0.972 | -0.899 | 0.397609 | 0.664302 |
| 11080 | 10462217 | <a href="#">NM_015826</a>          | <a href="#">50796</a>     | doublesex and mab-3 related tr                           | <a href="#">Dmrt1</a>              | 0.972 | -0.267 | 0.796706 | 0.917464 |
| 11081 | 10461217 | <a href="#">NM_001098237</a>       | <a href="#">75291</a>     | zinc finger and BTB domain con                           | <a href="#">Zbtb3</a>              | 0.972 | -0.581 | 0.578918 | 0.798552 |

|       |          |                                    |                           |                                 |                                    |       |        |           |          |
|-------|----------|------------------------------------|---------------------------|---------------------------------|------------------------------------|-------|--------|-----------|----------|
| 11082 | 10468816 | <a href="#">BC026363</a>           | <a href="#">78832</a>     | RIKEN cDNA 2700078E11 gene      | <a href="#">2700078E11Rik</a>      | 0.972 | -1.158 | 0.283943  | 0.559215 |
| 11083 | 10351487 |                                    |                           |                                 |                                    | 0.972 | -0.199 | 0.847527  | 0.938274 |
| 11084 | 10393801 | <a href="#">NM_025560</a>          | <a href="#">66431</a>     | RIKEN cDNA 1810049H13 gene      | <a href="#">1810049H13Rik</a>      | 0.972 | -0.79  | 0.454487  | 0.710892 |
| 11085 | 10602644 | <a href="#">NM_013668</a>          | <a href="#">20591</a>     | jumonji, AT rich interactive d  | <a href="#">Jard1c</a>             | 0.972 | -0.314 | 0.76253   | 0.901202 |
| 11086 | 10579437 | <a href="#">NM_026964</a>          | <a href="#">234388</a>    | coiled-coil domain containing   | <a href="#">Ccdc124</a>            | 0.972 | -1.512 | 0.173145  | 0.425638 |
| 11087 | 10497617 | <a href="#">NM_029690</a>          | <a href="#">76652</a>     | actin related protein M1        | <a href="#">Arpm1</a>              | 0.972 | -0.11  | 0.915618  | 0.966659 |
| 11088 | 10553115 | <a href="#">NM_001005511</a>       | <a href="#">381983</a>    | lemur tyrosine kinase 3         | <a href="#">Lmtk3</a>              | 0.972 | -0.526 | 0.614762  | 0.821749 |
| 11089 | 10398920 | <a href="#">BC090976</a>           | <a href="#">217887</a>    | cDNA sequence BC022687          | <a href="#">BC022687</a>           | 0.972 | -0.673 | 0.522142  | 0.759088 |
| 11090 | 10416950 |                                    |                           |                                 |                                    | 0.972 | -0.588 | 0.574163  | 0.797076 |
| 11091 | 10394988 |                                    |                           |                                 |                                    | 0.972 | 0.131  | 0.899698  | 0.960245 |
| 11092 | 10547758 | <a href="#">NM_013536</a>          | <a href="#">14791</a>     | EMG1 nucleolar protein homolog  | <a href="#">Emg1</a>               | 0.972 | -1.015 | 0.342768  | 0.617098 |
| 11093 | 10568792 | <a href="#">NM_021302</a>          | <a href="#">57740</a>     | serine/threonine kinase 32C     | <a href="#">Stk32c</a>             | 0.972 | 0.127  | 0.90225   | 0.9616   |
| 11094 | 10449320 | <a href="#">NM_173027</a>          | <a href="#">271424</a>    | inositol hexaphosphate kinase   | <a href="#">Ihpk3</a>              | 0.972 | -0.471 | 0.651392  | 0.843859 |
| 11095 | 10588049 | <a href="#">NM_015827</a>          | <a href="#">50797</a>     | coatomer protein complex, subu  | <a href="#">Copb2</a>              | 0.972 | -0.974 | 0.361513  | 0.633294 |
| 11096 | 10473760 | <a href="#">NM_017368</a>          | <a href="#">13046</a>     | CUG triplet repeat, RNA bindin  | <a href="#">Cugbp1</a>             | 0.972 | -0.592 | 0.571772  | 0.795942 |
| 11097 | 10369929 |                                    |                           |                                 |                                    | 0.972 | -0.406 | 0.696649  | 0.866876 |
| 11098 | 10572064 |                                    |                           |                                 |                                    | 0.972 | -0.213 | 0.837433  | 0.934421 |
| 11099 | 10470248 | <a href="#">NM_153410</a>          | <a href="#">67839</a>     | G-protein signalling modulator  | <a href="#">Gpsm1</a>              | 0.972 | -1.044 | 0.330091  | 0.606486 |
| 11100 | 10452937 | <a href="#">NM_001081179</a>       | <a href="#">320473</a>    | HEAT repeat containing 5B       | <a href="#">Heatr5b</a>            | 0.972 | -0.985 | 0.356537  | 0.629004 |
| 11101 | 10519219 | <a href="#">NM_024472</a>          | <a href="#">79554</a>     | glycolipid transfer protein do  | <a href="#">Gltpd1</a>             | 0.972 | -1.047 | 0.328831  | 0.605213 |
| 11102 | 10590974 | <a href="#">NM_176807</a>          | <a href="#">64931</a>     | folate receptor 4 (delta)       | <a href="#">Folr4</a>              | 0.972 | 0.41   | 0.693492  | 0.865698 |
| 11103 | 10497998 |                                    |                           |                                 |                                    | 0.972 | -0.576 | 0.582405  | 0.800864 |
| 11104 | 10552566 | <a href="#">NM_010116</a>          | <a href="#">13648</a>     | kallikrein 1-related peptidase  | <a href="#">Klk1b9</a>             | 0.972 | 0.231  | 0.823922  | 0.929508 |
| 11105 | 10588326 | <a href="#">NM_028721</a>          | <a href="#">74025</a>     | nephronophthisis 3 (adolescent  | <a href="#">Nphp3</a>              | 0.972 | -0.455 | 0.662557  | 0.849733 |
| 11106 | 10461274 | <a href="#">NM_176843</a>          | <a href="#">109077</a>    | integrator complex subunit 5    | <a href="#">Ints5</a>              | 0.972 | -1.144 | 0.288996  | 0.565029 |
| 11107 | 10423629 | <a href="#">NM_152894</a>          | <a href="#">67724</a>     | processing of precursor 1, rib  | <a href="#">Pop1</a>               | 0.972 | -0.53  | 0.611875  | 0.820022 |
| 11108 | 10364338 | <a href="#">NM_026431</a>          | <a href="#">67884</a>     | RIKEN cDNA 1810043G02 gene      | <a href="#">1810043G02Rik</a>      | 0.972 | -0.981 | 0.358503  | 0.630584 |
| 11109 | 10448527 | <a href="#">NM_001031621</a>       | <a href="#">381072</a>    | ATP-binding cassette, sub-fami  | <a href="#">Abca17</a>             | 0.972 | 0.115  | 0.911375  | 0.964566 |
| 11110 | 10456194 | <a href="#">NM_028017</a>          | <a href="#">108123</a>    | N-ethylmaleimide sensitive fus  | <a href="#">Napg</a>               | 0.972 | -0.907 | 0.3939    | 0.661714 |
| 11111 | 10507110 |                                    |                           |                                 |                                    | 0.972 | -0.271 | 0.794066  | 0.91622  |
| 11112 | 10578279 | <a href="#">ENSMUST00000098818</a> | <a href="#">100038612</a> | predicted gene, ENSMUSG0000007  | <a href="#">ENSMUSG00000074381</a> | 0.972 | 0.23   | 0.824845  | 0.929565 |
| 11113 | 10454944 | <a href="#">NM_201256</a>          | <a href="#">108112</a>    | eukaryotic translation initiat  | <a href="#">Eif4ebp3</a>           | 0.971 | -0.692 | 0.510742  | 0.751976 |
| 11114 | 10402353 | <a href="#">NM_145449</a>          | <a href="#">217845</a>    | RIKEN cDNA 1810023F06 gene      | <a href="#">1810023F06Rik</a>      | 0.971 | -0.123 | 0.905702  | 0.963405 |
| 11115 | 10357339 | <a href="#">NM_145100</a>          | <a href="#">72585</a>     | Ly6/Plaur domain containing 1   | <a href="#">Lypd1</a>              | 0.971 | -0.642 | 0.540855  | 0.773267 |
| 11116 | 10386934 | <a href="#">NM_021539</a>          | <a href="#">59043</a>     | WD repeat and SOCS box- contain | <a href="#">Wsb2</a>               | 0.971 | -0.203 | 0.844997  | 0.937001 |
| 11117 | 10486552 | <a href="#">NM_025657</a>          | <a href="#">66606</a>     | leucine rich repeat containing  | <a href="#">Lrrc57</a>             | 0.971 | -1.079 | 0.315435  | 0.592323 |
| 11118 | 10511309 | <a href="#">AK137636</a>           | <a href="#">435821</a>    | RIKEN cDNA 9930005F22 gene      | <a href="#">9930005F22Rik</a>      | 0.971 | -0.237 | 0.819431  | 0.928264 |
| 11119 | 10442649 | <a href="#">AK005803</a>           | <a href="#">100038762</a> | predicted gene, ENSMUSG0000005  | <a href="#">ENSMUSG00000054119</a> | 0.971 | -0.312 | 0.763579  | 0.901503 |
| 11120 | 10416494 | <a href="#">ENSMUST00000066181</a> | <a href="#">791335</a>    | predicted gene, ENSMUSG0000005  | <a href="#">ENSMUSG00000053632</a> | 0.971 | -0.148 | 0.886301  | 0.955393 |
| 11121 | 10561356 | <a href="#">NM_011874</a>          | <a href="#">23996</a>     | proteasome (prosome, macropain  | <a href="#">Psmc4</a>              | 0.971 | -0.981 | 0.358319  | 0.630567 |
| 11122 | 10449527 | <a href="#">NM_134115</a>          | <a href="#">106504</a>    | serine/threonine kinase 38      | <a href="#">Stk38</a>              | 0.971 | -0.431 | 0.678984  | 0.857533 |
| 11123 | 10575833 | <a href="#">NM_008290</a>          | <a href="#">15486</a>     | hydroxysteroid (17-beta) dehyd  | <a href="#">Hsd17b2</a>            | 0.971 | -0.463 | 0.656848  | 0.84644  |
| 11124 | 10348547 | <a href="#">NM_026454</a>          | <a href="#">67921</a>     | ubiquitin-conjugating enzyme E  | <a href="#">Ube2f</a>              | 0.971 | -0.85  | 0.422461  | 0.684746 |
| 11125 | 10395312 | <a href="#">NM_172253</a>          | <a href="#">28071</a>     | TWIST neighbor                  | <a href="#">Twistnb</a>            | 0.971 | -2.096 | 0.0731167 | 0.255028 |
| 11126 | 10509161 |                                    |                           |                                 |                                    | 0.971 | -0.255 | 0.805771  | 0.921628 |
| 11127 | 10459837 | <a href="#">BC120889</a>           | <a href="#">212163</a>    | RIKEN cDNA 8030462N17 gene      | <a href="#">8030462N17Rik</a>      | 0.971 | -0.936 | 0.379757  | 0.649537 |
| 11128 | 10455297 | <a href="#">ENSMUST00000091925</a> | <a href="#">225416</a>    | predicted gene, EG225416        | <a href="#">EG225416</a>           | 0.971 | -0.522 | 0.617299  | 0.823029 |
| 11129 | 10553769 | <a href="#">ENSMUST00000085241</a> | <a href="#">791383</a>    | predicted gene, ENSMUSG0000005  | <a href="#">ENSMUSG00000055048</a> | 0.971 | 0.023  | 0.982277  | 0.9924   |
| 11130 | 10405783 |                                    |                           |                                 |                                    | 0.971 | 0.454  | 0.663355  | 0.850117 |

|       |          |                                    |                           |                                |                                    |       |        |          |          |
|-------|----------|------------------------------------|---------------------------|--------------------------------|------------------------------------|-------|--------|----------|----------|
| 11131 | 10545623 | <a href="#">NM_010070</a>          | <a href="#">13448</a>     | docking protein 1              | <a href="#">Dok1</a>               | 0.971 | -0.371 | 0.721199 | 0.878601 |
| 11132 | 10398601 | <a href="#">NM_198023</a>          | <a href="#">217864</a>    | REST corepressor 1             | <a href="#">Rcor1</a>              | 0.971 | -0.88  | 0.407188 | 0.67168  |
| 11133 | 10458782 | <a href="#">ENSMUST00000084260</a> | <a href="#">225467</a>    | protein geranylgeranyltransfer | <a href="#">Pgg1b</a>              | 0.971 | -0.533 | 0.610005 | 0.818605 |
| 11134 | 10364841 | <a href="#">NM_027829</a>          | <a href="#">71564</a>     | RIKEN cDNA 9030607L17 gene     | <a href="#">9030607L17Rik</a>      | 0.971 | -0.277 | 0.789253 | 0.914259 |
| 11135 | 10391207 | <a href="#">NM_030150</a>          | <a href="#">80861</a>     | DEXH (Asp-Glu-X-His) box polyp | <a href="#">Dhx58</a>              | 0.971 | -0.043 | 0.967174 | 0.986966 |
| 11136 | 10564762 | <a href="#">NM_019799</a>          | <a href="#">56315</a>     | Rhesus blood group-associated  | <a href="#">Rhcg</a>               | 0.971 | -0.219 | 0.832424 | 0.932679 |
| 11137 | 10387557 |                                    |                           |                                |                                    | 0.971 | -0.391 | 0.707139 | 0.872175 |
| 11138 | 10575917 | <a href="#">NM_023395</a>          | <a href="#">67866</a>     | WAP four-disulfide core domain | <a href="#">Wfdc1</a>              | 0.971 | -0.264 | 0.798934 | 0.918828 |
| 11139 | 10476130 | <a href="#">BC049710</a>           | <a href="#">75656</a>     | RIKEN cDNA 1700020A23          | <a href="#">1700020A23Rik</a>      | 0.971 | -0.34  | 0.743218 | 0.890598 |
| 11140 | 10379200 | <a href="#">NM_008759</a>          | <a href="#">18292</a>     | SEBOX homeobox gene            | <a href="#">Sebox</a>              | 0.971 | -0.107 | 0.91788  | 0.967712 |
| 11141 | 10395672 | <a href="#">NM_021710</a>          | <a href="#">11782</a>     | adaptor-related protein comple | <a href="#">Ap4s1</a>              | 0.971 | -0.949 | 0.373202 | 0.64348  |
| 11142 | 10548871 | <a href="#">NM_001039558</a>       | <a href="#">654818</a>    | RIKEN cDNA C030030A07 gene     | <a href="#">C030030A07Rik</a>      | 0.971 | 0.23   | 0.824111 | 0.929508 |
| 11143 | 10540812 | <a href="#">NM_001033463</a>       | <a href="#">381801</a>    | TatD DNase domain containing 2 | <a href="#">Tatdn2</a>             | 0.971 | -0.534 | 0.609603 | 0.818311 |
| 11144 | 10378065 | <a href="#">ENSMUST00000066087</a> | <a href="#">75304</a>     | RIKEN cDNA 4930563E22 gene     | <a href="#">4930563E22Rik</a>      | 0.971 | -0.107 | 0.917435 | 0.967494 |
| 11145 | 10551030 | <a href="#">NM_008488</a>          | <a href="#">16801</a>     | Rho guanine nucleotide exchang | <a href="#">Arhgef1</a>            | 0.971 | -1.137 | 0.291819 | 0.567841 |
| 11146 | 10581674 | <a href="#">NM_133953</a>          | <a href="#">101943</a>    | splicing factor 3b, subunit 3  | <a href="#">Sf3b3</a>              | 0.971 | -0.86  | 0.417395 | 0.680204 |
| 11147 | 10449523 | <a href="#">NM_153390</a>          | <a href="#">69307</a>     | peroxisomal, testis specific 1 | <a href="#">Pxt1</a>               | 0.971 | 0.093  | 0.9282   | 0.971746 |
| 11148 | 10605252 | <a href="#">ENSMUST00000114328</a> | <a href="#">385380</a>    | testis expressed 28            | <a href="#">Tex28</a>              | 0.971 | 0.48   | 0.64522  | 0.839798 |
| 11149 | 10463189 | <a href="#">NM_020033</a>          | <a href="#">56642</a>     | ankyrin repeat domain 2 (stret | <a href="#">Ankrd2</a>             | 0.971 | -0.5   | 0.631867 | 0.832719 |
| 11150 | 10586602 | <a href="#">ENSMUST00000098612</a> | <a href="#">100038381</a> | predicted gene, ENSMUSG0000007 | <a href="#">ENSMUSG00000074232</a> | 0.971 | -0.29  | 0.780119 | 0.910713 |
| 11151 | 10607841 | <a href="#">NM_001007577</a>       | <a href="#">245695</a>    | RIKEN cDNA A630018P17 gene     | <a href="#">A630018P17Rik</a>      | 0.971 | -0.337 | 0.745507 | 0.891679 |
| 11152 | 10371296 | <a href="#">NM_029102</a>          | <a href="#">74782</a>     | glycosyltransferase 8 domain c | <a href="#">Glt8d2</a>             | 0.971 | 0.12   | 0.908045 | 0.963723 |
| 11153 | 10459236 | <a href="#">NM_021296</a>          | <a href="#">17714</a>     | GrpE-like 2, mitochondrial     | <a href="#">Grpel2</a>             | 0.971 | -0.688 | 0.513168 | 0.753594 |
| 11154 | 10596583 | <a href="#">NM_153413</a>          | <a href="#">208869</a>    | dedicator of cyto-kinesis 3    | <a href="#">Dock3</a>              | 0.971 | -0.841 | 0.427131 | 0.688411 |
| 11155 | 10475643 | <a href="#">NM_008008</a>          | <a href="#">14178</a>     | fibroblast growth factor 7     | <a href="#">Fgf7</a>               | 0.971 | -0.226 | 0.827678 | 0.93066  |
| 11156 | 10508892 | <a href="#">NM_172876</a>          | <a href="#">242691</a>    | G patch domain containing 3    | <a href="#">Gpatch3</a>            | 0.971 | -0.562 | 0.590882 | 0.806403 |
| 11157 | 10420035 | <a href="#">NM_024267</a>          | <a href="#">75751</a>     | importin 4                     | <a href="#">Ipo4</a>               | 0.971 | -0.753 | 0.475156 | 0.726714 |
| 11158 | 10462632 | <a href="#">NM_183046</a>          | <a href="#">240641</a>    | kinesin family member 20B      | <a href="#">Kif20b</a>             | 0.971 | -0.58  | 0.579525 | 0.798949 |
| 11159 | 10380954 | <a href="#">ENSMUST00000116117</a> | <a href="#">192852</a>    | gene model 12, (NCBI)          | <a href="#">Gm12</a>               | 0.971 | -0.168 | 0.871276 | 0.948575 |
| 11160 | 10492341 | <a href="#">NM_001081295</a>       | <a href="#">622434</a>    | RIKEN cDNA 4631416L12 gene     | <a href="#">4631416L12Rik</a>      | 0.971 | -0.392 | 0.706473 | 0.871814 |
| 11161 | 10549386 |                                    |                           |                                |                                    | 0.971 | -0.389 | 0.708835 | 0.872545 |
| 11162 | 10581111 | <a href="#">NM_144931</a>          | <a href="#">234664</a>    | NEDD8 activating enzyme E1 sub | <a href="#">Nae1</a>               | 0.971 | -1.08  | 0.314887 | 0.59182  |
| 11163 | 10583548 | <a href="#">AK006986</a>           | <a href="#">76618</a>     | RIKEN cDNA 1700084C06 gene     | <a href="#">1700084C06Rik</a>      | 0.971 | -0.4   | 0.700981 | 0.868962 |
| 11164 | 10420785 | <a href="#">ENSMUST00000089320</a> | <a href="#">210376</a>    | myotubularin related protein 9 | <a href="#">Mtmr9</a>              | 0.971 | -0.736 | 0.48499  | 0.733398 |
| 11165 | 10593605 | <a href="#">NM_027807</a>          | <a href="#">75717</a>     | cullin 5                       | <a href="#">Cul5</a>               | 0.971 | -1.075 | 0.31697  | 0.594204 |
| 11166 | 10449581 | <a href="#">NM_019880</a>          | <a href="#">56462</a>     | mitochondrial carrier homolog  | <a href="#">Mtch1</a>              | 0.971 | -0.832 | 0.432148 | 0.692537 |
| 11167 | 10465246 | <a href="#">NM_026169</a>          | <a href="#">67457</a>     | FERM domain containing 8       | <a href="#">Frmf8</a>              | 0.971 | -0.441 | 0.672012 | 0.854437 |
| 11168 | 10502230 |                                    |                           |                                |                                    | 0.971 | -0.627 | 0.549697 | 0.779911 |
| 11169 | 10448737 | <a href="#">NM_026684</a>          | <a href="#">68342</a>     | NADH dehydrogenase (ubiquinone | <a href="#">Ndufb10</a>            | 0.971 | -1.129 | 0.295179 | 0.571492 |
| 11170 | 10537007 | <a href="#">BC049755</a>           | <a href="#">75647</a>     | RIKEN cDNA 1700025E21 gene     | <a href="#">1700025E21Rik</a>      | 0.971 | -0.484 | 0.642963 | 0.838239 |
| 11171 | 10405948 | <a href="#">NM_001001185</a>       | <a href="#">408058</a>    | cDNA sequence BC048507         | <a href="#">BC048507</a>           | 0.971 | -0.659 | 0.530067 | 0.765294 |
| 11172 | 10450224 |                                    |                           |                                |                                    | 0.971 | -0.281 | 0.786727 | 0.91293  |
| 11173 | 10382701 | <a href="#">NM_020483</a>          | <a href="#">57230</a>     | SAP30 binding protein          | <a href="#">Sap30bp</a>            | 0.971 | -0.684 | 0.51546  | 0.754997 |
| 11174 | 10477894 | <a href="#">ENSMUST00000069111</a> | <a href="#">791421</a>    | predicted gene, OTTMUSG0000001 | <a href="#">OTTMUSG00000015868</a> | 0.971 | -0.287 | 0.782045 | 0.911385 |
| 11175 | 10590915 | <a href="#">NM_173433</a>          | <a href="#">244694</a>    | jumonji domain containing 2D   | <a href="#">Jmjd2d</a>             | 0.971 | -0.557 | 0.594198 | 0.808477 |
| 11176 | 10356510 | <a href="#">ENSMUST00000113094</a> | <a href="#">74918</a>     | IQ motif containing with AAA d | <a href="#">Iqca</a>               | 0.971 | -0.633 | 0.546205 | 0.777655 |
| 11177 | 10463200 | <a href="#">BC016430</a>           | <a href="#">67432</a>     | RIKEN cDNA 0610010D20 gene     | <a href="#">0610010D20Rik</a>      | 0.971 | -0.316 | 0.761046 | 0.900342 |
| 11178 | 10371796 | <a href="#">NM_182959</a>          | <a href="#">216227</a>    | solute carrier family 17 (sodi | <a href="#">Slc17a8</a>            | 0.971 | -0.074 | 0.942643 | 0.977825 |

|       |          |                                    |                           |                                                         |                                    |       |        |          |          |
|-------|----------|------------------------------------|---------------------------|---------------------------------------------------------|------------------------------------|-------|--------|----------|----------|
| 11179 | 10577154 | <a href="#">NM_009724</a>          | <a href="#">11945</a>     | ATPase, H <sup>+</sup> /K <sup>+</sup> exchanging, beta | <a href="#">Atp4b</a>              | 0.971 | -0.238 | 0.818854 | 0.928008 |
| 11180 | 10382376 | <a href="#">NM_053273</a>          | <a href="#">117160</a>    | tweety homolog 2 (Drosophila)                           | <a href="#">Ttyh2</a>              | 0.971 | -0.518 | 0.61982  | 0.825074 |
| 11181 | 10580852 |                                    |                           |                                                         |                                    | 0.971 | -0.583 | 0.577353 | 0.797771 |
| 11182 | 10452633 | <a href="#">NM_009372</a>          | <a href="#">21815</a>     | TG interacting factor 1                                 | <a href="#">Tgif1</a>              | 0.971 | -0.679 | 0.518495 | 0.757012 |
| 11183 | 10374119 | <a href="#">NM_010956</a>          | <a href="#">18293</a>     | oxoglutarate dehydrogenase (li                          | <a href="#">Ogdh</a>               | 0.971 | -1.202 | 0.267249 | 0.54188  |
| 11184 | 10583286 | <a href="#">NM_010287</a>          | <a href="#">14608</a>     | G protein-coupled receptor 83                           | <a href="#">Gpr83</a>              | 0.971 | 0.103  | 0.920959 | 0.968408 |
| 11185 | 10557311 | <a href="#">ENSMUST00000104912</a> | <a href="#">791408</a>    | predicted gene, ENSMUSG0000006                          | <a href="#">ENSMUSG00000066185</a> | 0.971 | -0.573 | 0.58424  | 0.80205  |
| 11186 | 10468300 | <a href="#">NM_001081271</a>       | <a href="#">546729</a>    | predicted gene, EG546729                                | <a href="#">EG546729</a>           | 0.971 | -0.378 | 0.716344 | 0.875716 |
| 11187 | 10411491 | <a href="#">NM_178716</a>          | <a href="#">238799</a>    | transportin 1                                           | <a href="#">Tnpol</a>              | 0.971 | -0.718 | 0.495076 | 0.73999  |
| 11188 | 10454831 | <a href="#">NM_026420</a>          | <a href="#">67869</a>     | polyadenylate-binding protein-                          | <a href="#">Paip2</a>              | 0.971 | -0.723 | 0.492373 | 0.738402 |
| 11189 | 10598107 | <a href="#">NM_021466</a>          | <a href="#">21339</a>     | TATA box binding protein (Tbp)                          | <a href="#">Taf1a</a>              | 0.971 | -0.275 | 0.790725 | 0.914692 |
| 11190 | 10345656 | <a href="#">NM_001011684</a>       | <a href="#">433292</a>    | neuromedin S                                            | <a href="#">Nms</a>                | 0.971 | -0.445 | 0.669171 | 0.852809 |
| 11191 | 10558643 | <a href="#">NM_001011776</a>       | <a href="#">257939</a>    | olfactory receptor 527                                  | <a href="#">Olfir527</a>           | 0.971 | -0.112 | 0.913699 | 0.965865 |
| 11192 | 10511935 | <a href="#">NM_001033225</a>       | <a href="#">108767</a>    | proline-rich nuclear receptor                           | <a href="#">Pnrc1</a>              | 0.971 | -1.322 | 0.226504 | 0.497153 |
| 11193 | 10484987 | <a href="#">NM_013839</a>          | <a href="#">22259</a>     | nuclear receptor subfamily 1,                           | <a href="#">Nr1h3</a>              | 0.971 | -0.434 | 0.677057 | 0.856509 |
| 11194 | 10409236 |                                    |                           |                                                         |                                    | 0.971 | -0.537 | 0.607196 | 0.817118 |
| 11195 | 10397761 | <a href="#">ENSMUST00000101129</a> | <a href="#">100038713</a> | predicted gene, ENSMUSG0000007                          | <a href="#">ENSMUSG00000072882</a> | 0.971 | -0.238 | 0.818811 | 0.928008 |
| 11196 | 10505980 | <a href="#">NM_001113412</a>       | <a href="#">75578</a>     | FGGY carbohydrate kinase domai                          | <a href="#">Fggy</a>               | 0.971 | -0.046 | 0.964632 | 0.985942 |
| 11197 | 10500345 | <a href="#">NR_001579</a>          | <a href="#">21748</a>     | telomerase RNA component                                | <a href="#">Terc</a>               | 0.971 | -0.009 | 0.992787 | 0.99722  |
| 11198 | 10548769 | <a href="#">NM_010352</a>          | <a href="#">14840</a>     | germ cell-specific gene 1                               | <a href="#">Gsg1</a>               | 0.971 | -0.643 | 0.540054 | 0.772571 |
| 11199 | 10411464 | <a href="#">NM_172591</a>          | <a href="#">218503</a>    | FCH domain only 2                                       | <a href="#">Fcho2</a>              | 0.971 | -0.49  | 0.638567 | 0.835923 |
| 11200 | 10503008 |                                    |                           |                                                         |                                    | 0.971 | -0.119 | 0.908647 | 0.963765 |
| 11201 | 10504948 | <a href="#">ENSMUST00000041392</a> | <a href="#">74914</a>     | cylicin, basic protein of sper                          | <a href="#">Cyle2</a>              | 0.971 | -0.347 | 0.738215 | 0.88841  |
| 11202 | 10505102 | <a href="#">ENSMUST00000084590</a> | <a href="#">791419</a>    | predicted gene, OTTMUSG0000000                          | <a href="#">OTTMUSG00000007234</a> | 0.971 | 0.162  | 0.876048 | 0.95093  |
| 11203 | 10503723 | <a href="#">NM_001081392</a>       | <a href="#">100019</a>    | midasin homolog (yeast)                                 | <a href="#">Mdn1</a>               | 0.97  | -0.719 | 0.494849 | 0.739807 |
| 11204 | 10453761 |                                    |                           |                                                         |                                    | 0.97  | 0.205  | 0.84336  | 0.936555 |
| 11205 | 10356470 | <a href="#">NM_008132</a>          | <a href="#">14659</a>     | glutamine repeat protein 1                              | <a href="#">Glrp1</a>              | 0.97  | -0.139 | 0.893494 | 0.957966 |
| 11206 | 10525195 | <a href="#">AK137099</a>           | <a href="#">269700</a>    | expressed sequence AU042671                             | <a href="#">AU042671</a>           | 0.97  | -0.694 | 0.509282 | 0.750558 |
| 11207 | 10541301 | <a href="#">NM_017379</a>          | <a href="#">53857</a>     | tubulin, alpha 8                                        | <a href="#">Tuba8</a>              | 0.97  | -0.021 | 0.983708 | 0.993007 |
| 11208 | 10600899 | <a href="#">BC111868</a>           | <a href="#">245526</a>    | G protein-coupled receptor 15-                          | <a href="#">Pgr15l</a>             | 0.97  | -0.128 | 0.901572 | 0.961364 |
| 11209 | 10424493 | <a href="#">NM_009375</a>          | <a href="#">21819</a>     | thyroglobulin                                           | <a href="#">Tg</a>                 | 0.97  | -0.367 | 0.72395  | 0.88046  |
| 11210 | 10553598 | <a href="#">NM_011370</a>          | <a href="#">20430</a>     | cytoplasmic FMR1 interacting p                          | <a href="#">Cyfip1</a>             | 0.97  | -1.053 | 0.326465 | 0.602834 |
| 11211 | 10475144 | <a href="#">NM_007601</a>          | <a href="#">12335</a>     | calpain 3                                               | <a href="#">Capn3</a>              | 0.97  | -0.79  | 0.454495 | 0.710892 |
| 11212 | 10394954 | <a href="#">NM_145890</a>          | <a href="#">195733</a>    | grainyhead-like 1 (Drosophila)                          | <a href="#">Grhl1</a>              | 0.97  | -0.282 | 0.785996 | 0.912636 |
| 11213 | 10593913 | <a href="#">NM_028820</a>          | <a href="#">74211</a>     | septin 14                                               | <a href="#">Sept14</a>             | 0.97  | -0.794 | 0.452341 | 0.708922 |
| 11214 | 10550564 | <a href="#">NM_010058</a>          | <a href="#">13401</a>     | dystrophia myotonica-containin                          | <a href="#">Dmwd</a>               | 0.97  | -0.552 | 0.597315 | 0.810475 |
| 11215 | 10606654 | <a href="#">NM_183319</a>          | <a href="#">331524</a>    | X Kell blood group precursor r                          | <a href="#">Xkrx</a>               | 0.97  | -0.142 | 0.890677 | 0.957227 |
| 11216 | 10595013 | <a href="#">NM_016711</a>          | <a href="#">50876</a>     | tropomodulin 2                                          | <a href="#">Tmod2</a>              | 0.97  | -1.17  | 0.279085 | 0.554134 |
| 11217 | 10415778 | <a href="#">NM_177337</a>          | <a href="#">219144</a>    | ADP-ribosylation factor-like 1                          | <a href="#">Arl11</a>              | 0.97  | -0.41  | 0.693398 | 0.865683 |
| 11218 | 10582201 | <a href="#">NM_010926</a>          | <a href="#">18117</a>     | COX4 neighbor                                           | <a href="#">Cox4nb</a>             | 0.97  | -0.926 | 0.384186 | 0.653466 |
| 11219 | 10557035 | <a href="#">NM_025298</a>          | <a href="#">26939</a>     | polymerase (RNA) III (DNA dire                          | <a href="#">Polr3e</a>             | 0.97  | -0.885 | 0.40491  | 0.669594 |
| 11220 | 10383208 | <a href="#">ENSMUST00000093902</a> | <a href="#">672511</a>    | hypothetical LOC672511                                  | <a href="#">LOC672511</a>          | 0.97  | 0.009  | 0.993446 | 0.997551 |
| 11221 | 10550625 |                                    |                           |                                                         |                                    | 0.97  | 0.167  | 0.871657 | 0.948704 |
| 11222 | 10360187 | <a href="#">NM_033509</a>          | <a href="#">93840</a>     | vang-like 2 (van gogh, Drosoph                          | <a href="#">Vangl2</a>             | 0.97  | -1.092 | 0.310009 | 0.586741 |
| 11223 | 10349610 | <a href="#">NM_010709</a>          | <a href="#">16865</a>     | ligatin                                                 | <a href="#">Lgtn</a>               | 0.97  | -0.857 | 0.419154 | 0.681475 |
| 11224 | 10350753 | <a href="#">NM_008131</a>          | <a href="#">14645</a>     | glutamate-ammonia ligase (glut                          | <a href="#">Glul</a>               | 0.97  | -0.695 | 0.509087 | 0.750516 |
| 11225 | 10448975 | <a href="#">NM_145409</a>          | <a href="#">214901</a>    | CTF18, chromosome transmission                          | <a href="#">Chtf18</a>             | 0.97  | -0.663 | 0.528084 | 0.763475 |
| 11226 | 10480087 | <a href="#">XR_032234</a>          | <a href="#">675534</a>    | similar to Importin alpha-2 su                          | <a href="#">LOC675534</a>          | 0.97  | -0.569 | 0.586509 | 0.803673 |
| 11227 | 10477543 | <a href="#">NM_172860</a>          | <a href="#">12396</a>     | core-binding factor, runt doma                          | <a href="#">Cbfa2t2</a>            | 0.97  | -0.684 | 0.515232 | 0.754854 |
| 11228 | 10476276 | <a href="#">NM_144888</a>          | <a href="#">228607</a>    | RIKEN cDNA D430028G21 gene                              | <a href="#">D430028G21Rik</a>      | 0.97  | -0.43  | 0.679583 | 0.857705 |
| 11229 | 10460544 | <a href="#">NM_026553</a>          | <a href="#">68090</a>     | Yin1 interacting factor homolo                          | <a href="#">Yif1a</a>              | 0.97  | -1.452 | 0.188699 | 0.446774 |

|       |          |                                    |                           |                                |                                    |      |        |          |          |
|-------|----------|------------------------------------|---------------------------|--------------------------------|------------------------------------|------|--------|----------|----------|
| 11230 | 10438060 | <a href="#">ENSMUST00000100136</a> | <a href="#">16136</a>     | immunoglobulin lambda-like pol | <a href="#">Igl11</a>              | 0.97 | -0.286 | 0.782698 | 0.911672 |
| 11231 | 10542836 | <a href="#">NM_001081237</a>       | <a href="#">232539</a>    | kelch domain containing 5      | <a href="#">Klhdc5</a>             | 0.97 | -0.825 | 0.435901 | 0.695863 |
| 11232 | 10529651 | <a href="#">NM_010835</a>          | <a href="#">17701</a>     | homeobox, msh-like 1           | <a href="#">Msx1</a>               | 0.97 | -0.34  | 0.74336  | 0.89069  |
| 11233 | 10585889 | <a href="#">NM_175235</a>          | <a href="#">76183</a>     | bruno-like 6, RNA binding prot | <a href="#">Bruno6</a>             | 0.97 | -0.7   | 0.505633 | 0.747578 |
| 11234 | 10345141 | <a href="#">NM_026719</a>          | <a href="#">68421</a>     | LMBR1 domain containing 1      | <a href="#">Lmbrd1</a>             | 0.97 | -0.587 | 0.575255 | 0.797076 |
| 11235 | 10353679 | <a href="#">XR_004787</a>          | <a href="#">675497</a>    | hypothetical protein LOC675497 | <a href="#">LOC675497</a>          | 0.97 | -0.757 | 0.47283  | 0.724458 |
| 11236 | 10522895 | <a href="#">NM_007786</a>          | <a href="#">12994</a>     | casein kappa                   | <a href="#">Csn3</a>               | 0.97 | -0.364 | 0.726054 | 0.88142  |
| 11237 | 10479765 | <a href="#">NM_022724</a>          | <a href="#">64707</a>     | suppressor of variegation 3-9  | <a href="#">Suv39h2</a>            | 0.97 | -0.917 | 0.38861  | 0.657212 |
| 11238 | 10463630 |                                    |                           |                                |                                    | 0.97 | -0.229 | 0.824921 | 0.929565 |
| 11239 | 10534638 | <a href="#">AK014627</a>           | <a href="#">74576</a>     | RIKEN cDNA 4731417B20 gene     | <a href="#">4731417B20Rik</a>      | 0.97 | -0.272 | 0.79344  | 0.915898 |
| 11240 | 10487238 | <a href="#">NM_008230</a>          | <a href="#">15186</a>     | histidine decarboxylase        | <a href="#">Hdc</a>                | 0.97 | -0.654 | 0.533506 | 0.767534 |
| 11241 | 10574350 | <a href="#">NM_008609</a>          | <a href="#">17388</a>     | matrix metalloproteinase 15    | <a href="#">Mmp15</a>              | 0.97 | -0.586 | 0.57559  | 0.797076 |
| 11242 | 10510047 | <a href="#">ENSMUST00000097804</a> | <a href="#">100038693</a> | predicted gene, ENSMUSG0000007 | <a href="#">ENSMUSG00000073728</a> | 0.97 | -0.035 | 0.973296 | 0.988537 |
| 11243 | 10459602 | <a href="#">AK171711</a>           | <a href="#">19255</a>     | protein tyrosine phosphatase,  | <a href="#">Ptpn2</a>              | 0.97 | -0.462 | 0.657542 | 0.846871 |
| 11244 | 10470381 | <a href="#">NM_029862</a>          | <a href="#">381356</a>    | RIKEN cDNA 5930434B04 gene     | <a href="#">5930434B04Rik</a>      | 0.97 | -0.437 | 0.675188 | 0.855723 |
| 11245 | 10494122 | <a href="#">NM_017395</a>          | <a href="#">53970</a>     | regulatory factor X, 5 (influe | <a href="#">Rfx5</a>               | 0.97 | -0.414 | 0.691018 | 0.864447 |
| 11246 | 10529903 | <a href="#">AB257856</a>           | <a href="#">58227</a>     | RIKEN cDNA 9630031F12 gene     | <a href="#">9630031F12Rik</a>      | 0.97 | -0.273 | 0.792608 | 0.91549  |
| 11247 | 10519497 | <a href="#">NM_054098</a>          | <a href="#">117167</a>    | STEAP family member 4          | <a href="#">Steap4</a>             | 0.97 | -0.408 | 0.695242 | 0.866195 |
| 11248 | 10528202 |                                    |                           |                                |                                    | 0.97 | -0.096 | 0.926473 | 0.97081  |
| 11249 | 10402757 | <a href="#">ENSMUST00000050754</a> | <a href="#">319590</a>    | RIKEN cDNA A730018C14 gene     | <a href="#">A730018C14Rik</a>      | 0.97 | -0.077 | 0.940728 | 0.977    |
| 11250 | 10501775 |                                    |                           |                                |                                    | 0.97 | -0.499 | 0.632808 | 0.833028 |
| 11251 | 10365408 | <a href="#">NM_183172</a>          | <a href="#">237422</a>    | resistance to inhibitors of ch | <a href="#">Ric8b</a>              | 0.97 | -0.674 | 0.521197 | 0.758676 |
| 11252 | 10480869 | <a href="#">NM_001001714</a>       | <a href="#">227631</a>    | spermatogenesis and oogenesis  | <a href="#">Sohlh1</a>             | 0.97 | -0.221 | 0.831319 | 0.932333 |
| 11253 | 10571384 | <a href="#">ENSMUST00000068999</a> | <a href="#">78506</a>     | RIKEN cDNA 2900075B16 gene     | <a href="#">2900075B16Rik</a>      | 0.97 | -0.487 | 0.640987 | 0.837375 |
| 11254 | 10484920 | <a href="#">NM_025576</a>          | <a href="#">66461</a>     | protein tyrosine phosphatase,  | <a href="#">Ptpmt1</a>             | 0.97 | -0.387 | 0.710102 | 0.873031 |
| 11255 | 10504316 | <a href="#">NM_011571</a>          | <a href="#">21754</a>     | testis specific protein kinase | <a href="#">Tek1</a>               | 0.97 | -0.822 | 0.437337 | 0.696704 |
| 11256 | 10433660 | <a href="#">NM_025976</a>          | <a href="#">67118</a>     | bifunctional apoptosis regulat | <a href="#">Bfar</a>               | 0.97 | -0.835 | 0.430707 | 0.691411 |
| 11257 | 10518473 | <a href="#">NM_015797</a>          | <a href="#">50762</a>     | F-box protein 6                | <a href="#">Fbxo6</a>              | 0.97 | -0.33  | 0.750772 | 0.894733 |
| 11258 | 10539091 | <a href="#">NM_147779</a>          | <a href="#">20388</a>     | surfactant associated protein  | <a href="#">Sftpb</a>              | 0.97 | -0.339 | 0.744129 | 0.89128  |
| 11259 | 10370999 | <a href="#">BC072620</a>           | <a href="#">237403</a>    | cDNA sequence BC072620         | <a href="#">BC072620</a>           | 0.97 | -0.43  | 0.679614 | 0.857705 |
| 11260 | 10550935 | <a href="#">NM_009532</a>          | <a href="#">22594</a>     | X-ray repair complementing def | <a href="#">Xrcc1</a>              | 0.97 | -1.155 | 0.284843 | 0.56015  |
| 11261 | 10506638 | <a href="#">NM_172873</a>          | <a href="#">242603</a>    | CUB domain containing protein  | <a href="#">Cdcp2</a>              | 0.97 | -0.11  | 0.915526 | 0.966659 |
| 11262 | 10518902 | <a href="#">NM_008237</a>          | <a href="#">15207</a>     | hairy and enhancer of split 3  | <a href="#">Hes3</a>               | 0.97 | -0.633 | 0.546552 | 0.77773  |
| 11263 | 10414163 | <a href="#">NM_146245</a>          | <a href="#">239037</a>    | leucine-rich repeat, immunoglo | <a href="#">Lrit1</a>              | 0.97 | 0.014  | 0.98955  | 0.995388 |
| 11264 | 10566395 | <a href="#">NM_201409</a>          | <a href="#">381944</a>    | deubiquitinating enzyme 1a     | <a href="#">Dub1a</a>              | 0.97 | -0.212 | 0.838113 | 0.934421 |
| 11265 | 10516956 | <a href="#">NM_133888</a>          | <a href="#">100340</a>    | sphingomyelin phosphodiesteras | <a href="#">Smpd13b</a>            | 0.97 | -0.343 | 0.74134  | 0.889595 |
| 11266 | 10549057 | <a href="#">NM_023042</a>          | <a href="#">19691</a>     | RecQ protein-like              | <a href="#">Recql</a>              | 0.97 | -0.529 | 0.612882 | 0.820539 |
| 11267 | 10580875 | <a href="#">NM_008187</a>          | <a href="#">14894</a>     | gene trap locus 3              | <a href="#">Gtl3</a>               | 0.97 | -0.581 | 0.578842 | 0.798528 |
| 11268 | 10606914 | <a href="#">NM_007957</a>          | <a href="#">13984</a>     | extraembryonic, spermatogenesi | <a href="#">Esx1</a>               | 0.97 | 0.096  | 0.926503 | 0.97081  |
| 11269 | 10491691 |                                    |                           |                                |                                    | 0.97 | -0.014 | 0.989082 | 0.995308 |
| 11270 | 10438289 | <a href="#">ENSMUST00000100100</a> | <a href="#">66779</a>     | RIKEN cDNA 4933432I09 gene     | <a href="#">4933432I09Rik</a>      | 0.97 | -0.185 | 0.858604 | 0.943286 |
| 11271 | 10559172 | <a href="#">ENSMUST00000084414</a> | <a href="#">77215</a>     | keratin associated protein 5-3 | <a href="#">Krtap5-3</a>           | 0.97 | 0.163  | 0.875331 | 0.950704 |
| 11272 | 10426760 | <a href="#">NM_009699</a>          | <a href="#">11827</a>     | aquaporin 2                    | <a href="#">Aqp2</a>               | 0.97 | -0.285 | 0.783806 | 0.912068 |
| 11273 | 10495964 | <a href="#">NM_009718</a>          | <a href="#">11924</a>     | neurogenin 2                   | <a href="#">Neurog2</a>            | 0.97 | -0.348 | 0.737459 | 0.888025 |
| 11274 | 10454655 | <a href="#">NM_007462</a>          | <a href="#">11789</a>     | adenomatosis polyposis coli    | <a href="#">Apc</a>                | 0.97 | -0.613 | 0.558497 | 0.786209 |
| 11275 | 10563323 | <a href="#">NM_008749</a>          | <a href="#">18220</a>     | nucleobindin 1                 | <a href="#">Nucb1</a>              | 0.97 | -0.88  | 0.407124 | 0.671626 |
| 11276 | 10395136 |                                    |                           |                                |                                    | 0.97 | -0.721 | 0.493338 | 0.739056 |
| 11277 | 10452000 | <a href="#">NM_172624</a>          | <a href="#">224897</a>    | dipeptidylpeptidase 9          | <a href="#">Dpp9</a>               | 0.97 | -0.84  | 0.427946 | 0.689167 |
| 11278 | 10576797 | <a href="#">XM_001472875</a>       | <a href="#">664870</a>    | Wilms' tumour 1-associating pr | <a href="#">LOC664870</a>          | 0.97 | -0.467 | 0.654573 | 0.84526  |
| 11279 | 10487269 | <a href="#">NM_029163</a>          | <a href="#">75083</a>     | ubiquitin specific peptidase 5 | <a href="#">Usp50</a>              | 0.97 | -0.716 | 0.496653 | 0.741089 |
| 11280 | 10555720 | <a href="#">NM_147101</a>          | <a href="#">259105</a>    | olfactory receptor 549         | <a href="#">Olfir549</a>           | 0.97 | -0.219 | 0.833008 | 0.932751 |
| 11281 | 10395692 | <a href="#">NM_009706</a>          | <a href="#">11855</a>     | Rho GTPase activating protein  | <a href="#">Arhgap5</a>            | 0.97 | -0.566 | 0.588883 | 0.805202 |
| 11282 | 10400200 | <a href="#">NM_144807</a>          | <a href="#">246702</a>    | apolipoprotein A I binding pro | <a href="#">Apoa1b</a>             | 0.97 | 1.25   | 0.250222 | 0.524275 |

|       |          |                                    |                        |                                |                               |       |        |          |          |
|-------|----------|------------------------------------|------------------------|--------------------------------|-------------------------------|-------|--------|----------|----------|
| 11282 | 10499509 | <a href="#">NM_144897</a>          | <a href="#">240703</a> | apolipoprotein A-1 binding pro | <a href="#">Apoa1bp</a>       | 0.97  | -1.23  | 0.230555 | 0.324573 |
| 11283 | 10577237 | <a href="#">NM_001007591</a>       | <a href="#">434285</a> | expressed sequence BB014433    | <a href="#">BB014433</a>      | 0.97  | -0.234 | 0.821531 | 0.92863  |
| 11284 | 10515696 | <a href="#">ENSMUST00000075406</a> | <a href="#">230676</a> | cDNA sequence BC059842         | <a href="#">BC059842</a>      | 0.97  | -0.53  | 0.612118 | 0.820192 |
| 11285 | 10562064 | <a href="#">NM_007959</a>          | <a href="#">14008</a>  | ets variant gene 2             | <a href="#">Etv2</a>          | 0.97  | 0.04   | 0.969201 | 0.987586 |
| 11286 | 10445789 | <a href="#">NM_027763</a>          | <a href="#">71326</a>  | triggering receptor expressed  | <a href="#">Trem1</a>         | 0.97  | -0.235 | 0.821053 | 0.92863  |
| 11287 | 10546624 | <a href="#">NM_001081157</a>       | <a href="#">320502</a> | leiomodrin 3 (fetal)           | <a href="#">Lmod3</a>         | 0.97  | -0.165 | 0.873506 | 0.949487 |
| 11288 | 10369453 | <a href="#">NM_013753</a>          | <a href="#">27355</a>  | cDNA sequence X99384           | <a href="#">X99384</a>        | 0.97  | -0.809 | 0.444193 | 0.702635 |
| 11289 | 10566434 | <a href="#">NM_020290</a>          | <a href="#">56860</a>  | olfactory receptor 690         | <a href="#">Olf690</a>        | 0.97  | -0.528 | 0.613429 | 0.820926 |
| 11290 | 10528507 | <a href="#">NM_178403</a>          | <a href="#">78697</a>  | pseudouridylate synthase 7 hom | <a href="#">Pus7</a>          | 0.97  | -0.557 | 0.594596 | 0.80881  |
| 11291 | 10414497 | <a href="#">NM_009632</a>          | <a href="#">11546</a>  | poly (ADP-ribose) polymerase f | <a href="#">Parp2</a>         | 0.97  | -0.939 | 0.378305 | 0.648156 |
| 11292 | 10539880 | <a href="#">NM_019964</a>          | <a href="#">56691</a>  | DnaJ (Hsp40) homolog, subfamil | <a href="#">Dnajb8</a>        | 0.97  | -0.23  | 0.824149 | 0.929508 |
| 11293 | 10495279 | <a href="#">NM_011967</a>          | <a href="#">26442</a>  | proteasome (prosome, macropain | <a href="#">Psm5</a>          | 0.97  | -0.843 | 0.426387 | 0.687967 |
| 11294 | 10380501 | <a href="#">NM_010055</a>          | <a href="#">13393</a>  | distal-less homeobox 3         | <a href="#">Dlx3</a>          | 0.97  | -0.484 | 0.642554 | 0.838134 |
| 11295 | 10603425 | <a href="#">NM_027227</a>          | <a href="#">69824</a>  | glyoxalase domain containing 5 | <a href="#">Glox5</a>         | 0.97  | -0.206 | 0.842157 | 0.936059 |
| 11296 | 10357288 | <a href="#">NM_010483</a>          | <a href="#">15564</a>  | 5-hydroxytryptamine (serotonin | <a href="#">Htr5b</a>         | 0.97  | -0.643 | 0.540405 | 0.772885 |
| 11297 | 10442454 | <a href="#">BC083113</a>           | <a href="#">67078</a>  | RIKEN cDNA 1700012G19 gene     | <a href="#">1700012G19Rik</a> | 0.969 | -0.706 | 0.502162 | 0.745102 |
| 11298 | 10349559 | <a href="#">NM_178691</a>          | <a href="#">226418</a> | YOD1 OTU deubiquitinating enzy | <a href="#">Yod1</a>          | 0.969 | -1.111 | 0.302247 | 0.578434 |
| 11299 | 10461100 | <a href="#">NM_025731</a>          | <a href="#">66727</a>  | HRAS-like suppressor family, m | <a href="#">Hrasls5</a>       | 0.969 | -0.628 | 0.549503 | 0.779882 |
| 11300 | 10599579 | <a href="#">NM_207240</a>          | <a href="#">236784</a> | olfactory receptor 1320        | <a href="#">Olf1320</a>       | 0.969 | 0.092  | 0.928938 | 0.972036 |
| 11301 | 10417912 | <a href="#">NM_030180</a>          | <a href="#">78787</a>  | ubiquitin specific peptidase 5 | <a href="#">Usp54</a>         | 0.969 | -1.078 | 0.315844 | 0.592774 |
| 11302 | 10359970 | <a href="#">NM_001109985</a>       | <a href="#">70729</a>  | nitric oxide synthase 1 (neuro | <a href="#">Nos1ap</a>        | 0.969 | -0.6   | 0.567045 | 0.792621 |
| 11303 | 10532308 | <a href="#">XR_033031</a>          | <a href="#">675756</a> | hypothetical protein LOC675756 | <a href="#">LOC675756</a>     | 0.969 | -1.152 | 0.286092 | 0.561612 |
| 11304 | 10363983 | <a href="#">NM_001081412</a>       | <a href="#">110279</a> | breakpoint cluster region homo | <a href="#">Bcr</a>           | 0.969 | -0.919 | 0.387867 | 0.656721 |
| 11305 | 10444436 | <a href="#">NM_019873</a>          | <a href="#">56299</a>  | FK506 binding protein-like     | <a href="#">Fkbp1</a>         | 0.969 | -0.647 | 0.537711 | 0.770752 |
| 11306 | 10378497 | <a href="#">NM_010813</a>          | <a href="#">17428</a>  | max binding protein            | <a href="#">Mnt</a>           | 0.969 | -0.589 | 0.573893 | 0.797007 |
| 11307 | 10400894 | <a href="#">NM_181752</a>          | <a href="#">238252</a> | G protein-coupled receptor 135 | <a href="#">Gpr135</a>        | 0.969 | -0.375 | 0.718281 | 0.876988 |
| 11308 | 10389114 | <a href="#">NM_145431</a>          | <a href="#">217011</a> | notchless homolog 1 (Drosophil | <a href="#">Nle1</a>          | 0.969 | -0.522 | 0.61735  | 0.823029 |
| 11309 | 10473160 | <a href="#">NM_080558</a>          | <a href="#">70599</a>  | sperm specific antigen 2       | <a href="#">Ssfa2</a>         | 0.969 | -1.13  | 0.294581 | 0.570921 |
| 11310 | 10496621 | <a href="#">NM_145546</a>          | <a href="#">229906</a> | general transcription factor I | <a href="#">Gtf2b</a>         | 0.969 | -0.834 | 0.43086  | 0.691522 |
| 11311 | 10453499 | <a href="#">NM_013523</a>          | <a href="#">14309</a>  | follicle stimulating hormone r | <a href="#">Fshr</a>          | 0.969 | -0.043 | 0.966896 | 0.986963 |
| 11312 | 10382756 | <a href="#">NM_172569</a>          | <a href="#">217331</a> | unkempt homolog (Drosophila)   | <a href="#">Unk</a>           | 0.969 | -0.808 | 0.44475  | 0.703193 |
| 11313 | 10527026 | <a href="#">BC068301</a>           | <a href="#">231841</a> | EST AA881470                   | <a href="#">AA881470</a>      | 0.969 | -0.537 | 0.607186 | 0.817118 |
| 11314 | 10597918 |                                    |                        |                                |                               | 0.969 | -1.393 | 0.205179 | 0.468786 |
| 11315 | 10424363 | <a href="#">NM_026746</a>          | <a href="#">68501</a>  | non-SMC element 2 homolog (MMS | <a href="#">Nsmce2</a>        | 0.969 | -0.476 | 0.648004 | 0.841712 |
| 11316 | 10568982 | <a href="#">NM_001001180</a>       | <a href="#">407812</a> | cDNA sequence BC066028         | <a href="#">BC066028</a>      | 0.969 | -0.421 | 0.686028 | 0.861365 |
| 11317 | 10607334 |                                    |                        |                                |                               | 0.969 | -0.776 | 0.462702 | 0.717151 |
| 11318 | 10450800 | <a href="#">NM_001024134</a>       | <a href="#">69097</a>  | tripartite motif-containing 15 | <a href="#">Trim15</a>        | 0.969 | -0.802 | 0.448221 | 0.70581  |
| 11319 | 10443550 | <a href="#">NM_021419</a>          | <a href="#">58230</a>  | ring finger protein 8          | <a href="#">Rnf8</a>          | 0.969 | -0.829 | 0.433623 | 0.694075 |
| 11320 | 10397482 | <a href="#">NM_172583</a>          | <a href="#">217733</a> | transmembrane protein 63c      | <a href="#">Tmem63c</a>       | 0.969 | -0.367 | 0.724472 | 0.880611 |
| 11321 | 10354233 | <a href="#">NM_001013025</a>       | <a href="#">73122</a>  | transforming growth factor, be | <a href="#">Tgfbrap1</a>      | 0.969 | -0.564 | 0.590035 | 0.805977 |
| 11322 | 10468303 | <a href="#">XM_001472011</a>       | <a href="#">240669</a> | predicted gene, EG240669       | <a href="#">EG240669</a>      | 0.969 | -0.182 | 0.860692 | 0.943954 |
| 11323 | 10499493 | <a href="#">NM_008227</a>          | <a href="#">15168</a>  | hyperpolarization-activated, c | <a href="#">Hcn3</a>          | 0.969 | -0.131 | 0.899026 | 0.960129 |
| 11324 | 10598723 | <a href="#">NM_010028</a>          | <a href="#">13205</a>  | DEAD/H (Asp-Glu-Ala-Asp/His) b | <a href="#">Ddx3x</a>         | 0.969 | -0.677 | 0.519388 | 0.757547 |
| 11325 | 10387251 |                                    |                        |                                |                               | 0.969 | -0.284 | 0.784607 | 0.912276 |
| 11326 | 10570850 | <a href="#">NM_145592</a>          | <a href="#">234130</a> | dickkopf homolog 4 (Xenopus la | <a href="#">Dkk4</a>          | 0.969 | -0.833 | 0.431695 | 0.692222 |
| 11327 | 10387372 | <a href="#">NM_001017426</a>       | <a href="#">216850</a> | jumonji domain containing 3    | <a href="#">Jmjd3</a>         | 0.969 | -0.693 | 0.510278 | 0.751397 |
| 11328 | 10461237 | <a href="#">NM_008144</a>          | <a href="#">14705</a>  | Bernardinelli-Seip congenital  | <a href="#">Bsc12</a>         | 0.969 | -0.437 | 0.674776 | 0.855557 |
| 11329 | 10354938 | <a href="#">NM_001033449</a>       | <a href="#">381259</a> | amyotrophic lateral sclerosis  | <a href="#">Als2cr4</a>       | 0.969 | -0.278 | 0.789006 | 0.914104 |
| 11330 | 10463371 | <a href="#">NM_011720</a>          | <a href="#">22423</a>  | wingless related MMTV integrat | <a href="#">Wnt8b</a>         | 0.969 | -0.254 | 0.806715 | 0.921832 |
| 11331 | 10356484 | <a href="#">NM_010262</a>          | <a href="#">14472</a>  | gastrulation brain homeobox 2  | <a href="#">Gbx2</a>          | 0.969 | -0.714 | 0.497599 | 0.741949 |
| 11332 | 10417998 |                                    |                        |                                |                               | 0.969 | -0.258 | 0.803469 | 0.920138 |
| 11333 | 10582078 |                                    |                        |                                |                               | 0.969 | -0.959 | 0.368619 | 0.639331 |
| 11334 | 10576883 | <a href="#">NM_011369</a>          | <a href="#">20419</a>  | Shc SH2-domain binding protein | <a href="#">Shcbp1</a>        | 0.969 | -0.795 | 0.452118 | 0.708922 |
| 11335 | 10537657 | <a href="#">NM_007680</a>          | <a href="#">13848</a>  | Eph receptor B6                | <a href="#">Ephb6</a>         | 0.969 | -0.248 | 0.810943 | 0.923749 |

|       |          |                                    |                           |                                |                               |       |        |          |          |
|-------|----------|------------------------------------|---------------------------|--------------------------------|-------------------------------|-------|--------|----------|----------|
| 11336 | 10353993 | <a href="#">NM_198006</a>          | <a href="#">76178</a>     | RIKEN cDNA 6330578E17 gene     | <a href="#">6330578E17Rik</a> | 0.969 | -0.637 | 0.543597 | 0.775859 |
| 11337 | 10384102 | <a href="#">NM_207242</a>          | <a href="#">237636</a>    | NPC1-like 1                    | <a href="#">Npc1l1</a>        | 0.969 | -0.439 | 0.673538 | 0.855025 |
| 11338 | 10601861 |                                    |                           |                                |                               | 0.969 | 0.251  | 0.808643 | 0.922966 |
| 11339 | 10370446 | <a href="#">NM_001081055</a>       | <a href="#">216131</a>    | transmembrane protein 1        | <a href="#">Tmem1</a>         | 0.969 | -0.833 | 0.431755 | 0.692222 |
| 11340 | 10349997 | <a href="#">BC116694</a>           | <a href="#">240755</a>    | RIKEN cDNA 4933406M09 gene     | <a href="#">4933406M09Rik</a> | 0.969 | -0.266 | 0.797546 | 0.917931 |
| 11341 | 10516093 | <a href="#">NM_007558</a>          | <a href="#">12163</a>     | bone morphogenetic protein 8a  | <a href="#">Bmp8a</a>         | 0.969 | -0.727 | 0.490391 | 0.737313 |
| 11342 | 10405851 |                                    |                           |                                |                               | 0.969 | -0.285 | 0.78389  | 0.912068 |
| 11343 | 10462313 | <a href="#">NM_009199</a>          | <a href="#">20510</a>     | solute carrier family 1 (neuro | <a href="#">Slc1a1</a>        | 0.969 | -0.462 | 0.657494 | 0.84686  |
| 11344 | 10547697 | <a href="#">BC120816</a>           | <a href="#">76921</a>     | RIKEN cDNA 1700013D24 gene     | <a href="#">1700013D24Rik</a> | 0.969 | -0.361 | 0.728358 | 0.882292 |
| 11345 | 10464783 | <a href="#">NM_023131</a>          | <a href="#">19671</a>     | RCE1 homolog, prenyl protein p | <a href="#">Rce1</a>          | 0.969 | -0.056 | 0.957177 | 0.983648 |
| 11346 | 10555901 | <a href="#">NM_147043</a>          | <a href="#">259045</a>    | olfactory receptor 669         | <a href="#">Olfr669</a>       | 0.969 | -0.519 | 0.619111 | 0.824741 |
| 11347 | 10537494 | <a href="#">NM_028358</a>          | <a href="#">381760</a>    | single-stranded DNA binding pr | <a href="#">Ssbp1</a>         | 0.969 | -0.461 | 0.65841  | 0.847214 |
| 11348 | 10431625 | <a href="#">NM_018803</a>          | <a href="#">54526</a>     | synaptotagmin X                | <a href="#">Syt10</a>         | 0.969 | -0.269 | 0.795479 | 0.916955 |
| 11349 | 10453705 | <a href="#">NM_181070</a>          | <a href="#">19330</a>     | RAB18, member RAS oncogene fam | <a href="#">Rab18</a>         | 0.969 | -0.595 | 0.569818 | 0.794162 |
| 11350 | 10456353 | <a href="#">NM_175012</a>          | <a href="#">225642</a>    | gastrin releasing peptide      | <a href="#">Grp</a>           | 0.969 | -0.704 | 0.503677 | 0.746064 |
| 11351 | 10474596 | <a href="#">NM_028844</a>          | <a href="#">74268</a>     | apoptosis, caspase activation  | <a href="#">Aven</a>          | 0.969 | -0.657 | 0.531451 | 0.765672 |
| 11352 | 10557109 | <a href="#">ENSMUST00000065310</a> | <a href="#">76613</a>     | RIKEN cDNA 1700069B07 gene     | <a href="#">1700069B07Rik</a> | 0.969 | -0.142 | 0.891312 | 0.957565 |
| 11353 | 10386189 | <a href="#">NM_146879</a>          | <a href="#">258879</a>    | olfactory receptor 330         | <a href="#">Olfr330</a>       | 0.969 | -0.031 | 0.976369 | 0.990137 |
| 11354 | 10415513 | <a href="#">NM_023773</a>          | <a href="#">75339</a>     | M-phase phosphoprotein 8       | <a href="#">Mphosph8</a>      | 0.969 | -0.88  | 0.407253 | 0.671681 |
| 11355 | 10589361 | <a href="#">NM_025689</a>          | <a href="#">66658</a>     | coiled-coil domain containing  | <a href="#">Ccdc51</a>        | 0.969 | -0.445 | 0.669457 | 0.852871 |
| 11356 | 10446613 | <a href="#">ENSMUST00000092011</a> | <a href="#">546695</a>    | similar to ribosomal protein L | <a href="#">LOC546695</a>     | 0.969 | -0.498 | 0.633082 | 0.833233 |
| 11357 | 10457409 | <a href="#">NM_021522</a>          | <a href="#">59025</a>     | ubiquitin specific peptidase 1 | <a href="#">Usp14</a>         | 0.969 | -0.996 | 0.351502 | 0.624753 |
| 11358 | 10564507 | <a href="#">NM_001042592</a>       | <a href="#">66412</a>     | arrestin domain containing 4   | <a href="#">Arrdc4</a>        | 0.969 | -0.66  | 0.529964 | 0.765251 |
| 11359 | 10534694 | <a href="#">NM_031405</a>          | <a href="#">83701</a>     | arsenate resistance protein 2  | <a href="#">Ars2</a>          | 0.969 | -0.705 | 0.502883 | 0.745637 |
| 11360 | 10360840 | <a href="#">NM_001081361</a>       | <a href="#">66112</a>     | MOCO sulphurase C-terminal dom | <a href="#">Moscl</a>         | 0.969 | -0.334 | 0.748116 | 0.893228 |
| 11361 | 10442085 |                                    |                           |                                |                               | 0.969 | 0.024  | 0.981834 | 0.992194 |
| 11362 | 10378988 | <a href="#">NM_174852</a>          | <a href="#">268448</a>    | PHD finger protein 12          | <a href="#">Phf12</a>         | 0.969 | -0.842 | 0.426638 | 0.68818  |
| 11363 | 10436053 | <a href="#">NM_028615</a>          | <a href="#">73703</a>     | developmental pluripotency ass | <a href="#">Dppa2</a>         | 0.969 | -0.119 | 0.908142 | 0.963723 |
| 11364 | 10360158 | <a href="#">NM_008534</a>          | <a href="#">17085</a>     | lymphocyte antigen 9           | <a href="#">Ly9</a>           | 0.969 | -0.614 | 0.558047 | 0.78589  |
| 11365 | 10592493 | <a href="#">NM_001081121</a>       | <a href="#">70989</a>     | RIKEN cDNA 4931429I11 gene     | <a href="#">4931429I11Rik</a> | 0.969 | -0.634 | 0.545514 | 0.777457 |
| 11366 | 10605651 |                                    |                           |                                |                               | 0.969 | -0.435 | 0.676018 | 0.855911 |
| 11367 | 10349480 | <a href="#">NM_181750</a>          | <a href="#">226412</a>    | R3H domain 1 (binds single-str | <a href="#">R3hdm1</a>        | 0.969 | -0.734 | 0.486361 | 0.734369 |
| 11368 | 10414920 | <a href="#">ENSMUST00000103637</a> | <a href="#">100042410</a> | T-cell receptor alpha variable | <a href="#">Trav7d-2</a>      | 0.969 | 0.269  | 0.795432 | 0.916955 |
| 11369 | 10404347 | <a href="#">NM_023746</a>          | <a href="#">28078</a>     | prolactin family 5, subfamily  | <a href="#">Prl5a1</a>        | 0.969 | -0.528 | 0.613538 | 0.82095  |
| 11370 | 10432840 | <a href="#">NM_010668</a>          | <a href="#">16681</a>     | keratin 2                      | <a href="#">Krt2</a>          | 0.969 | -0.113 | 0.912815 | 0.965173 |
| 11371 | 10347650 | <a href="#">NM_183022</a>          | <a href="#">241118</a>    | amiloride-sensitive cation cha | <a href="#">Accn4</a>         | 0.969 | -0.569 | 0.586451 | 0.803673 |
| 11372 | 10380591 | <a href="#">NM_033568</a>          | <a href="#">27681</a>     | SNF8, ESCRT-II complex subunit | <a href="#">Snf8</a>          | 0.968 | -1.357 | 0.215636 | 0.482783 |
| 11373 | 10393395 | <a href="#">NM_011358</a>          | <a href="#">20382</a>     | splicing factor, arginine/seri | <a href="#">Sfrs2</a>         | 0.968 | -0.452 | 0.664375 | 0.850284 |
| 11374 | 10379654 | <a href="#">NM_001035854</a>       | <a href="#">71770</a>     | adaptor-related protein comple | <a href="#">Ap2b1</a>         | 0.968 | -1.132 | 0.293875 | 0.56996  |
| 11375 | 10454015 | <a href="#">BC020021</a>           | <a href="#">72747</a>     | RIKEN cDNA 2810439F02 gene     | <a href="#">2810439F02Rik</a> | 0.968 | -0.697 | 0.507841 | 0.749793 |
| 11376 | 10459918 | <a href="#">BC064066</a>           | <a href="#">68731</a>     | RIKEN cDNA 1110032A13 gene     | <a href="#">1110032A13Rik</a> | 0.968 | -0.299 | 0.773214 | 0.9067   |
| 11377 | 10433003 | <a href="#">NM_130458</a>          | <a href="#">170574</a>    | trans-acting transcription fac | <a href="#">Sp7</a>           | 0.968 | -0.233 | 0.821909 | 0.92863  |
| 11378 | 10364051 | <a href="#">NM_026095</a>          | <a href="#">67332</a>     | small nuclear ribonucleoprotei | <a href="#">Snrpd3</a>        | 0.968 | -0.493 | 0.636472 | 0.834887 |
| 11379 | 10508961 | <a href="#">NM_001039677</a>       | <a href="#">230810</a>    | solute carrier family 30 (zinc | <a href="#">Slc30a2</a>       | 0.968 | -0.497 | 0.63387  | 0.833492 |
| 11380 | 10533869 | <a href="#">NM_144819</a>          | <a href="#">215707</a>    | coiled-coil domain containing  | <a href="#">Ccdc92</a>        | 0.968 | -0.63  | 0.547932 | 0.778543 |
| 11381 | 10481393 | <a href="#">NM_025428</a>          | <a href="#">66220</a>     | zinc finger, DHHC domain conta | <a href="#">Zdhhc12</a>       | 0.968 | -0.556 | 0.595238 | 0.809319 |
| 11382 | 10585417 | <a href="#">NM_029573</a>          | <a href="#">67834</a>     | isocitrate dehydrogenase 3 (NA | <a href="#">Idh3a</a>         | 0.968 | -0.751 | 0.476652 | 0.727638 |
| 11383 | 10429972 | <a href="#">NM_053193</a>          | <a href="#">94230</a>     | cleavage and polyadenylation s | <a href="#">Cpsf1</a>         | 0.968 | -0.827 | 0.434963 | 0.695306 |
| 11384 | 10390227 | <a href="#">NM_172300</a>          | <a href="#">268470</a>    | ubiquitin-conjugating enzyme E | <a href="#">Ube2z</a>         | 0.968 | -0.805 | 0.446442 | 0.70413  |
| 11385 | 10414040 |                                    |                           |                                |                               | 0.968 | -0.226 | 0.827236 | 0.930659 |
| 11386 | 10584954 | <a href="#">NM_008794</a>          | <a href="#">18554</a>     | proprotein convertase subtilis | <a href="#">Pcsk7</a>         | 0.968 | -0.801 | 0.448735 | 0.706272 |

|       |          |                                    |                        |                                 |                               |       |        |          |          |
|-------|----------|------------------------------------|------------------------|---------------------------------|-------------------------------|-------|--------|----------|----------|
| 11387 | 10557156 | <a href="#">NM_011121</a>          | <a href="#">18817</a>  | polo-like kinase 1 (Drosophila  | <a href="#">Plk1</a>          | 0.968 | -1.052 | 0.326705 | 0.602834 |
| 11388 | 10351769 | <a href="#">NM_080419</a>          | <a href="#">140559</a> | immunoglobulin superfamily, me  | <a href="#">Igsf8</a>         | 0.968 | -0.61  | 0.560624 | 0.78784  |
| 11389 | 10382482 | <a href="#">NM_172801</a>          | <a href="#">237987</a> | otopettrin 2                    | <a href="#">Otop2</a>         | 0.968 | -0.695 | 0.508727 | 0.750513 |
| 11390 | 10453825 | <a href="#">NM_009226</a>          | <a href="#">20641</a>  | small nuclear ribonucleoprotei  | <a href="#">Snrpd1</a>        | 0.968 | -0.743 | 0.481192 | 0.730704 |
| 11391 | 10405013 | <a href="#">NM_199056</a>          | <a href="#">75678</a>  | inositol 1,3,4,5,6-pentakispho  | <a href="#">Ippk</a>          | 0.968 | -0.259 | 0.803237 | 0.920074 |
| 11392 | 10560532 | <a href="#">BC070402</a>           | <a href="#">232947</a> | cDNA sequence BC024868          | <a href="#">BC024868</a>      | 0.968 | -0.641 | 0.541494 | 0.773858 |
| 11393 | 10481182 | <a href="#">NM_175427</a>          | <a href="#">109349</a> | RIKEN cDNA C630035N08 gene      | <a href="#">C630035N08Rik</a> | 0.968 | -0.581 | 0.579114 | 0.798694 |
| 11394 | 10447467 | <a href="#">NM_023630</a>          | <a href="#">71828</a>  | general transcription factor I  | <a href="#">Gtf2a11</a>       | 0.968 | -0.322 | 0.756668 | 0.897871 |
| 11395 | 10444066 | <a href="#">NM_020625</a>          | <a href="#">81630</a>  | zinc finger and BTB domain con  | <a href="#">Zbtb22</a>        | 0.968 | -1.356 | 0.216047 | 0.48309  |
| 11396 | 10424711 | <a href="#">NM_008164</a>          | <a href="#">14787</a>  | rhophilin, Rho GTPase binding   | <a href="#">Rhpn1</a>         | 0.968 | -0.268 | 0.796371 | 0.917464 |
| 11397 | 10532542 | <a href="#">NM_019982</a>          | <a href="#">56747</a>  | seizure related 6 homolog like  | <a href="#">Sez6l</a>         | 0.968 | -0.512 | 0.623751 | 0.828064 |
| 11398 | 10509555 |                                    |                        |                                 |                               | 0.968 | -0.235 | 0.820761 | 0.92863  |
| 11399 | 10391572 | <a href="#">NM_172947</a>          | <a href="#">268490</a> | LSM12 homolog (S. cerevisiae)   | <a href="#">Lsm12</a>         | 0.968 | -0.762 | 0.470453 | 0.722494 |
| 11400 | 10360018 | <a href="#">NM_145141</a>          | <a href="#">98752</a>  | Fc receptor-like A              | <a href="#">Fcr1a</a>         | 0.968 | -0.482 | 0.64423  | 0.839078 |
| 11401 | 10526133 | <a href="#">NM_019983</a>          | <a href="#">56715</a>  | RAB guanine nucleotide exchange | <a href="#">Rabgef1</a>       | 0.968 | -0.501 | 0.631578 | 0.832548 |
| 11402 | 10421863 | <a href="#">NM_001042726</a>       | <a href="#">18530</a>  | protocadherin 8                 | <a href="#">Pcdh8</a>         | 0.968 | -0.388 | 0.709527 | 0.872938 |
| 11403 | 10585444 | <a href="#">NM_022655</a>          | <a href="#">64602</a>  | iron responsive element bindin  | <a href="#">Ireb2</a>         | 0.968 | -0.468 | 0.653864 | 0.844861 |
| 11404 | 10432923 | <a href="#">NM_001033277</a>       | <a href="#">223918</a> | SPRY domain containing 3        | <a href="#">Spryd3</a>        | 0.968 | -0.552 | 0.597829 | 0.81086  |
| 11405 | 10428910 | <a href="#">ENSMUST00000096421</a> | <a href="#">71088</a>  | RIKEN cDNA 4933412E24 gene      | <a href="#">4933412E24Rik</a> | 0.968 | -0.041 | 0.968181 | 0.987184 |
| 11406 | 10357124 | <a href="#">NM_011650</a>          | <a href="#">22099</a>  | translin                        | <a href="#">Tsn</a>           | 0.968 | -0.824 | 0.436215 | 0.696174 |
| 11407 | 10550521 | <a href="#">NM_145579</a>          | <a href="#">232934</a> | Myb protein P42POP              | <a href="#">P42pop</a>        | 0.968 | -0.302 | 0.770841 | 0.905387 |
| 11408 | 10566601 | <a href="#">NM_146600</a>          | <a href="#">258593</a> | olfactory receptor 700          | <a href="#">Olfir700</a>      | 0.968 | -0.206 | 0.842294 | 0.936059 |
| 11409 | 10393685 |                                    |                        |                                 |                               | 0.968 | -0.074 | 0.942898 | 0.977825 |
| 11410 | 10605831 | <a href="#">NM_152822</a>          | <a href="#">76130</a>  | LAS1-like (S. cerevisiae)       | <a href="#">Las1l</a>         | 0.968 | -1.341 | 0.220712 | 0.489689 |
| 11411 | 10452142 | <a href="#">NM_178926</a>          | <a href="#">106639</a> | expressed sequence AI662250     | <a href="#">AI662250</a>      | 0.968 | -0.813 | 0.442074 | 0.7009   |
| 11412 | 10465089 | <a href="#">NM_001024560</a>       | <a href="#">225861</a> | sorting nexin 32                | <a href="#">Snx32</a>         | 0.968 | -0.138 | 0.893695 | 0.958083 |
| 11413 | 10478133 | <a href="#">NM_175419</a>          | <a href="#">109275</a> | ARP5 actin-related protein 5 h  | <a href="#">Actr5</a>         | 0.968 | -0.517 | 0.620804 | 0.825734 |
| 11414 | 10552907 | <a href="#">NM_001033176</a>       | <a href="#">76713</a>  | RIKEN cDNA 1700039E15 gene      | <a href="#">1700039E15Rik</a> | 0.968 | -0.226 | 0.8273   | 0.930659 |
| 11415 | 10544271 | <a href="#">NM_146382</a>          | <a href="#">258380</a> | olfactory receptor 461          | <a href="#">Olfir461</a>      | 0.968 | -0.115 | 0.911765 | 0.964738 |
| 11416 | 10566609 | <a href="#">NM_146353</a>          | <a href="#">258350</a> | olfactory receptor 706          | <a href="#">Olfir706</a>      | 0.968 | -0.164 | 0.874207 | 0.949962 |
| 11417 | 10601648 | <a href="#">NM_022322</a>          | <a href="#">64103</a>  | tenomodulin                     | <a href="#">Tnmd</a>          | 0.968 | -0.073 | 0.944026 | 0.977948 |
| 11418 | 10378627 | <a href="#">NM_001029938</a>       | <a href="#">280408</a> | Rab interacting lysosomal prot  | <a href="#">Rilp</a>          | 0.968 | -0.583 | 0.577534 | 0.797771 |
| 11419 | 10567108 | <a href="#">NM_011445</a>          | <a href="#">20679</a>  | SRY-box containing gene 6       | <a href="#">Sox6</a>          | 0.968 | -0.447 | 0.667787 | 0.851815 |
| 11420 | 10450648 | <a href="#">NM_013854</a>          | <a href="#">224742</a> | ATP-binding cassette, sub-fami  | <a href="#">Abcf1</a>         | 0.968 | -0.726 | 0.490605 | 0.737328 |
| 11421 | 10513186 | <a href="#">XM_884359</a>          | <a href="#">619973</a> | similar to LRRGT00183           | <a href="#">LOC619973</a>     | 0.968 | -0.311 | 0.764276 | 0.90173  |
| 11422 | 10444717 | <a href="#">NM_033477</a>          | <a href="#">114585</a> | DNA segment, Chr 17, human D6S  | <a href="#">D17H6S53E</a>     | 0.968 | -0.996 | 0.351658 | 0.624753 |
| 11423 | 10428326 |                                    |                        |                                 |                               | 0.968 | -0.123 | 0.905846 | 0.963405 |
| 11424 | 10378572 | <a href="#">BC021945</a>           | <a href="#">380712</a> | RIKEN cDNA 2010305C02 gene      | <a href="#">2010305C02Rik</a> | 0.968 | -0.416 | 0.689751 | 0.863782 |
| 11425 | 10594538 | <a href="#">ENSMUST00000098627</a> | <a href="#">102595</a> | pleckstrin homology domain con  | <a href="#">Plekho2</a>       | 0.968 | -0.19  | 0.854373 | 0.94105  |
| 11426 | 10508727 | <a href="#">NM_172400</a>          | <a href="#">68598</a>  | DnaJ (Hsp40) homolog, subfamil  | <a href="#">Dnajc8</a>        | 0.968 | -0.852 | 0.42184  | 0.684212 |
| 11427 | 10463803 | <a href="#">NM_009289</a>          | <a href="#">20874</a>  | STE20-like kinase (yeast)       | <a href="#">Slk</a>           | 0.968 | -0.527 | 0.613963 | 0.821282 |
| 11428 | 10535739 | <a href="#">NM_011669</a>          | <a href="#">22217</a>  | ubiquitin specific peptidase 1  | <a href="#">Usp12</a>         | 0.968 | -0.817 | 0.439852 | 0.699109 |
| 11429 | 10480423 | <a href="#">NM_001077190</a>       | <a href="#">11308</a>  | abl-interactor 1                | <a href="#">Abi1</a>          | 0.968 | -0.805 | 0.44649  | 0.704154 |
| 11430 | 10552672 | <a href="#">BC019451</a>           | <a href="#">68352</a>  | RIKEN cDNA 0610012D14 gene      | <a href="#">0610012D14Rik</a> | 0.968 | -0.117 | 0.909898 | 0.964056 |
| 11431 | 10347726 | <a href="#">XR_030615</a>          | <a href="#">383531</a> | similar to Rpl7a protein        | <a href="#">LOC383531</a>     | 0.968 | -0.12  | 0.908015 | 0.963723 |
| 11432 | 10527101 | <a href="#">NM_199068</a>          | <a href="#">17425</a>  | forkhead box K1                 | <a href="#">Foxk1</a>         | 0.968 | -0.62  | 0.554412 | 0.783484 |
| 11433 | 10518989 | <a href="#">NM_011642</a>          | <a href="#">22062</a>  | transformation related protein  | <a href="#">Trp73</a>         | 0.968 | -0.576 | 0.582097 | 0.800654 |
| 11434 | 10524681 | <a href="#">NM_026933</a>          | <a href="#">69076</a>  | TP53 regulated inhibitor of ap  | <a href="#">Triap1</a>        | 0.968 | -0.491 | 0.637687 | 0.835756 |
| 11435 | 10563130 | <a href="#">NM_145954</a>          | <a href="#">69748</a>  | aldehyde dehydrogenase 16 fami  | <a href="#">Aldh16a1</a>      | 0.968 | -0.563 | 0.590319 | 0.806156 |
| 11436 | 10557716 | <a href="#">NM_172281</a>          | <a href="#">233900</a> | ring finger protein 40          | <a href="#">Rnf40</a>         | 0.968 | -0.678 | 0.518817 | 0.757221 |
| 11437 | 10568150 | <a href="#">NM_145588</a>          | <a href="#">110033</a> | kinesin family member 22        | <a href="#">Kif22</a>         | 0.968 | -1.186 | 0.273055 | 0.547665 |
| 11438 | 10506150 | <a href="#">NM_010425</a>          | <a href="#">15221</a>  | forkhead box D3                 | <a href="#">Foxd3</a>         | 0.968 | -0.76  | 0.471104 | 0.722944 |
| 11439 | 10443039 | <a href="#">NM_172149</a>          | <a href="#">224630</a> | BC1.2/adenovirus F1B interactin | <a href="#">Bnin1</a>         | 0.968 | -0.766 | 0.467949 | 0.720483 |

|       |          |                                    |                           |                                             |                                    |       |        |          |          |
|-------|----------|------------------------------------|---------------------------|---------------------------------------------|------------------------------------|-------|--------|----------|----------|
| 11440 | 10425207 | <a href="#">NM_008197</a>          | <a href="#">14958</a>     | H1 histone family, member 0                 | <a href="#">H1f0</a>               | 0.968 | -0.885 | 0.404629 | 0.669338 |
| 11441 | 10545538 | <a href="#">NM_009819</a>          | <a href="#">12386</a>     | catenin (cadherin associated p              | <a href="#">Ctnna2</a>             | 0.968 | -0.182 | 0.860417 | 0.943954 |
| 11442 | 10385842 | <a href="#">NM_009012</a>          | <a href="#">19360</a>     | RAD50 homolog (S. cerevisiae)               | <a href="#">Rad50</a>              | 0.968 | -1.022 | 0.339856 | 0.615232 |
| 11443 | 10476691 | <a href="#">NM_029763</a>          | <a href="#">70408</a>     | polymerase (RNA) III (DNA dire              | <a href="#">Polr3f</a>             | 0.968 | -1.036 | 0.333616 | 0.609432 |
| 11444 | 10576124 | <a href="#">BC036332</a>           | <a href="#">66965</a>     | RIKEN cDNA 2310061F22 gene                  | <a href="#">2310061F22Rik</a>      | 0.968 | -0.886 | 0.4041   | 0.668818 |
| 11445 | 10558265 | <a href="#">NM_029609</a>          | <a href="#">76429</a>     | RIKEN cDNA 2310007H09 gene                  | <a href="#">2310007H09Rik</a>      | 0.968 | -0.195 | 0.851001 | 0.940103 |
| 11446 | 10494467 | <a href="#">NM_001081053</a>       | <a href="#">213119</a>    | integrin, alpha 10                          | <a href="#">Itga10</a>             | 0.968 | 0.087  | 0.932953 | 0.973276 |
| 11447 | 10347282 | <a href="#">NM_001034060</a>       | <a href="#">435626</a>    | RUN and FYVE domain containing              | <a href="#">Rufy4</a>              | 0.968 | -0.14  | 0.892403 | 0.957747 |
| 11448 | 10518735 | <a href="#">NM_029035</a>          | <a href="#">74646</a>     | splA/ryanodine receptor domain              | <a href="#">Spsb1</a>              | 0.968 | -0.68  | 0.517981 | 0.756834 |
| 11449 | 10449775 | <a href="#">NM_008716</a>          | <a href="#">18131</a>     | Notch gene homolog 3                        | <a href="#">Notch3</a>             | 0.968 | -0.587 | 0.57512  | 0.797076 |
| 11450 | 10518132 | <a href="#">NM_001081355</a>       | <a href="#">110593</a>    | (Drosophila) PR domain containing 2, with Z | <a href="#">Prdm2</a>              | 0.967 | -1.153 | 0.285516 | 0.560861 |
| 11451 | 10522248 | <a href="#">XR_033663</a>          | <a href="#">624662</a>    | similar to MGC69457 protein                 | <a href="#">LOC624662</a>          | 0.967 | -1.159 | 0.283428 | 0.558717 |
| 11452 | 10386209 | <a href="#">NM_001011769</a>       | <a href="#">257931</a>    | olfactory receptor 317                      | <a href="#">Olfr317</a>            | 0.967 | -0.31  | 0.765145 | 0.90235  |
| 11453 | 10591423 | <a href="#">ENSMUST00000115494</a> | <a href="#">100009600</a> | GATA-like 1                                 | <a href="#">Glp1</a>               | 0.967 | -0.791 | 0.45436  | 0.710796 |
| 11454 | 10396956 | <a href="#">NM_018814</a>          | <a href="#">54604</a>     | pecanex homolog (Drosophila)                | <a href="#">Pcnx</a>               | 0.967 | -0.681 | 0.516877 | 0.756112 |
| 11455 | 10516507 | <a href="#">NM_177758</a>          | <a href="#">269585</a>    | zinc finger and SCAN domains 2              | <a href="#">Zscan20</a>            | 0.967 | -0.726 | 0.490541 | 0.737328 |
| 11456 | 10400324 |                                    |                           |                                             |                                    | 0.967 | -0.293 | 0.778075 | 0.909683 |
| 11457 | 10476915 | <a href="#">NM_009978</a>          | <a href="#">13012</a>     | cystatin 8 (cystatin-related e              | <a href="#">Cst8</a>               | 0.967 | -0.148 | 0.886531 | 0.955393 |
| 11458 | 10379588 | <a href="#">NM_030224</a>          | <a href="#">78919</a>     | fibronectin type III domain co              | <a href="#">Fndc8</a>              | 0.967 | -0.706 | 0.502474 | 0.745462 |
| 11459 | 10376285 | <a href="#">NM_001081168</a>       | <a href="#">50724</a>     | SAP30-like                                  | <a href="#">Sap30l</a>             | 0.967 | -0.59  | 0.573344 | 0.796661 |
| 11460 | 10580484 | <a href="#">AK044128</a>           | <a href="#">234549</a>    | HEAT repeat containing 3                    | <a href="#">Heatr3</a>             | 0.967 | -0.26  | 0.801937 | 0.919813 |
| 11461 | 10398095 | <a href="#">NM_013773</a>          | <a href="#">27379</a>     | T-cell leukemia/lymphoma 1B, 1              | <a href="#">Tcl1b1</a>             | 0.967 | 0.072  | 0.944731 | 0.978132 |
| 11462 | 10565962 | <a href="#">NM_008773</a>          | <a href="#">18442</a>     | purinergic receptor P2Y, G-pro              | <a href="#">P2ry2</a>              | 0.967 | -0.391 | 0.707255 | 0.872175 |
| 11463 | 10580100 | <a href="#">NM_145970</a>          | <a href="#">212139</a>    | coiled-coil and C2 domain cont              | <a href="#">Cc2d1a</a>             | 0.967 | -0.69  | 0.512072 | 0.75265  |
| 11464 | 10424252 | <a href="#">BC051524</a>           | <a href="#">76773</a>     | RIKEN cDNA 2410187C16 gene                  | <a href="#">2410187C16Rik</a>      | 0.967 | -0.711 | 0.499497 | 0.742712 |
| 11465 | 10392863 | <a href="#">NM_010350</a>          | <a href="#">14813</a>     | glutamate receptor, ionotropic              | <a href="#">Grin2c</a>             | 0.967 | -0.35  | 0.736324 | 0.887164 |
| 11466 | 10567444 | <a href="#">BC051401</a>           | <a href="#">381917</a>    | dynein, axonemal, heavy chain               | <a href="#">Dnahe3</a>             | 0.967 | -0.369 | 0.722486 | 0.87936  |
| 11467 | 10357888 | <a href="#">ENSMUST00000027729</a> | <a href="#">68507</a>     | protein tyrosine phosphatase,               | <a href="#">Ppfia4</a>             | 0.967 | -0.115 | 0.911878 | 0.964809 |
| 11468 | 10569181 | <a href="#">NM_022654</a>          | <a href="#">57913</a>     | leucine-rich and death domain               | <a href="#">Lrdd</a>               | 0.967 | -0.522 | 0.617353 | 0.823029 |
| 11469 | 10397538 | <a href="#">XM_001476146</a>       | <a href="#">100045836</a> | hypothetical protein LOC100045              | <a href="#">LOC100045836</a>       | 0.967 | -0.352 | 0.735178 | 0.886784 |
| 11470 | 10510767 | <a href="#">NM_153424</a>          | <a href="#">260305</a>    | nephronophthisis 4 (juvenile)               | <a href="#">Nphp4</a>              | 0.967 | -0.315 | 0.761637 | 0.900675 |
| 11471 | 10414081 | <a href="#">NM_181529</a>          | <a href="#">319508</a>    | synaptotagmin XV                            | <a href="#">Syt15</a>              | 0.967 | -0.261 | 0.801415 | 0.919489 |
| 11472 | 10471411 | <a href="#">NM_133783</a>          | <a href="#">96979</a>     | prostaglandin E synthase 2                  | <a href="#">Ptges2</a>             | 0.967 | -0.417 | 0.68901  | 0.863366 |
| 11473 | 10514347 | <a href="#">NM_007670</a>          | <a href="#">12579</a>     | cyclin-dependent kinase inhibi              | <a href="#">Cdkn2b</a>             | 0.967 | -0.199 | 0.847891 | 0.938472 |
| 11474 | 10451238 | <a href="#">NM_009085</a>          | <a href="#">20016</a>     | RNA polymerase 1-1                          | <a href="#">Rpo1-1</a>             | 0.967 | -0.988 | 0.35515  | 0.627794 |
| 11475 | 10451193 | <a href="#">AK143033</a>           | <a href="#">100038605</a> | predicted gene, ENSMUSG0000007              | <a href="#">ENSMUSG00000073391</a> | 0.967 | 0.057  | 0.956045 | 0.983285 |
| 11476 | 10482496 | <a href="#">ENSMUST00000102769</a> | <a href="#">109129</a>    | RIKEN cDNA 2010311D03 gene                  | <a href="#">2010311D03Rik</a>      | 0.967 | -0.292 | 0.778669 | 0.909988 |
| 11477 | 10434481 | <a href="#">NM_145941</a>          | <a href="#">208643</a>    | eukaryotic translation initiat              | <a href="#">Eif4g1</a>             | 0.967 | -1.011 | 0.344834 | 0.618925 |
| 11478 | 10415187 | <a href="#">NM_001024645</a>       | <a href="#">268747</a>    | leucine rich repeat containing              | <a href="#">Lrrc16b</a>            | 0.967 | -0.813 | 0.44223  | 0.700945 |
| 11479 | 10567879 | <a href="#">NM_007504</a>          | <a href="#">11937</a>     | ATPase, Ca++ transporting, car              | <a href="#">Atp2a1</a>             | 0.967 | -0.408 | 0.695418 | 0.866211 |
| 11480 | 10459534 | <a href="#">NM_027130</a>          | <a href="#">69597</a>     | AFG3(ATPase family gene 3)-lik              | <a href="#">Afg3l2</a>             | 0.967 | -0.606 | 0.562789 | 0.789779 |
| 11481 | 10526931 | <a href="#">ENSMUST00000031521</a> | <a href="#">545817</a>    | cytochrome P450, family 2, sub              | <a href="#">Cyp2w1</a>             | 0.967 | -0.449 | 0.666742 | 0.851355 |
| 11482 | 10560685 | <a href="#">NM_033601</a>          | <a href="#">12051</a>     | B-cell leukemia/lymphoma 3                  | <a href="#">Bcl3</a>               | 0.967 | -0.886 | 0.404099 | 0.668818 |
| 11483 | 10570201 | <a href="#">NM_015804</a>          | <a href="#">50770</a>     | ATPase, class VI, type 11A,                 | <a href="#">Atp11a</a>             | 0.967 | -0.487 | 0.640945 | 0.837375 |
| 11484 | 10490745 | <a href="#">BC087873</a>           | <a href="#">277496</a>    | RIKEN cDNA 4930526D03 gene                  | <a href="#">4930526D03Rik</a>      | 0.967 | -0.62  | 0.55429  | 0.783468 |
| 11485 | 10605726 | <a href="#">XM_994312</a>          | <a href="#">668103</a>    | predicted gene, EG668103                    | <a href="#">EG668103</a>           | 0.967 | -0.504 | 0.629286 | 0.831256 |
| 11486 | 10388018 | <a href="#">NM_178367</a>          | <a href="#">216877</a>    | DEAH (Asp-Glu-Ala-His) box pol              | <a href="#">Dhx33</a>              | 0.967 | -0.689 | 0.512509 | 0.752977 |
| 11487 | 10481649 | <a href="#">ENSMUST00000100190</a> | <a href="#">319245</a>    | RIKEN cDNA 9430097D07 gene                  | <a href="#">9430097D07Rik</a>      | 0.967 | 0.089  | 0.931372 | 0.972759 |

|       |          |                                    |                        |                                 |                               |       |        |          |          |
|-------|----------|------------------------------------|------------------------|---------------------------------|-------------------------------|-------|--------|----------|----------|
| 11488 | 10563852 | <a href="#">NM_153578</a>          | <a href="#">233280</a> | non imprinted in Prader-Willi/  | <a href="#">Nipa1</a>         | 0.967 | -0.136 | 0.895653 | 0.959029 |
| 11489 | 10405662 | <a href="#">NM_030153</a>          | <a href="#">78689</a>  | MAK10 homolog, amino-acid N-ac  | <a href="#">Mak10</a>         | 0.967 | -1.247 | 0.251498 | 0.525513 |
| 11490 | 10388300 | <a href="#">NM_147004</a>          | <a href="#">259006</a> | olfactory receptor 399          | <a href="#">Olfr399</a>       | 0.967 | -0.122 | 0.90656  | 0.963405 |
| 11491 | 10548244 |                                    |                        |                                 |                               | 0.967 | -0.994 | 0.352565 | 0.625599 |
| 11492 | 10377847 | <a href="#">NM_146020</a>          | <a href="#">216871</a> | glycolipid transfer protein do  | <a href="#">Gltpd2</a>        | 0.967 | -0.598 | 0.56843  | 0.793239 |
| 11493 | 10389177 | <a href="#">NM_080453</a>          | <a href="#">118453</a> | matrix metalloproteinase 28 (ep | <a href="#">Mmp28</a>         | 0.967 | -0.447 | 0.667678 | 0.851783 |
| 11494 | 10557843 | <a href="#">NM_139149</a>          | <a href="#">233908</a> | fusion, derived from t(12;16)   | <a href="#">Fus</a>           | 0.967 | -0.806 | 0.445911 | 0.703765 |
| 11495 | 10493856 | <a href="#">ENSMUST00000090872</a> | <a href="#">20755</a>  | small proline-rich protein 2A   | <a href="#">Sprr2a</a>        | 0.967 | -0.223 | 0.829481 | 0.931316 |
| 11496 | 10493858 | <a href="#">ENSMUST00000090872</a> | <a href="#">20755</a>  | small proline-rich protein 2A   | <a href="#">Sprr2a</a>        | 0.967 | -0.223 | 0.829481 | 0.931316 |
| 11497 | 10480275 | <a href="#">NM_028757</a>          | <a href="#">74103</a>  | nebulin                         | <a href="#">Neb1</a>          | 0.967 | -0.899 | 0.397762 | 0.664302 |
| 11498 | 10400975 | <a href="#">NM_029580</a>          | <a href="#">76357</a>  | TRM5 tRNA methyltransferase 5   | <a href="#">Trmt5</a>         | 0.967 | -0.936 | 0.379533 | 0.649311 |
| 11499 | 10440465 |                                    |                        |                                 |                               | 0.967 | 0.124  | 0.904466 | 0.962829 |
| 11500 | 10360589 | <a href="#">NM_026375</a>          | <a href="#">226747</a> | AT hook containing transcripti  | <a href="#">Ahctf1</a>        | 0.967 | -0.767 | 0.467631 | 0.720331 |
| 11501 | 10490225 | <a href="#">NM_025531</a>          | <a href="#">66390</a>  | slowmo homolog 2 (Drosophila)   | <a href="#">Slmo2</a>         | 0.967 | -0.559 | 0.593106 | 0.80777  |
| 11502 | 10512487 | <a href="#">NR_001460</a>          | <a href="#">19782</a>  | RNA component of mitochondrial  | <a href="#">Rmrp</a>          | 0.967 | -0.063 | 0.951457 | 0.981144 |
| 11503 | 10499512 |                                    |                        |                                 |                               | 0.967 | -0.524 | 0.615831 | 0.822286 |
| 11504 | 10370089 | <a href="#">NM_001081419</a>       | <a href="#">64451</a>  | DIP2 disco-interacting protein  | <a href="#">Dip2a</a>         | 0.967 | -0.599 | 0.56762  | 0.792928 |
| 11505 | 10551496 | <a href="#">NM_019458</a>          | <a href="#">54624</a>  | Paf1, RNA polymerase II associ  | <a href="#">Paf1</a>          | 0.967 | -1.098 | 0.307624 | 0.584192 |
| 11506 | 10550172 | <a href="#">BC060121</a>           | <a href="#">228829</a> | PHD finger protein 20           | <a href="#">Phf20</a>         | 0.967 | -0.844 | 0.425628 | 0.687513 |
| 11507 | 10383109 | <a href="#">NM_130886</a>          | <a href="#">170720</a> | caspase recruitment domain fam  | <a href="#">Card14</a>        | 0.967 | -0.725 | 0.491128 | 0.737687 |
| 11508 | 10553743 | <a href="#">NM_021879</a>          | <a href="#">18431</a>  | oculocutaneous albinism II      | <a href="#">Oca2</a>          | 0.967 | -0.145 | 0.888448 | 0.956033 |
| 11509 | 10586724 | <a href="#">NM_145618</a>          | <a href="#">93697</a>  | NMDA receptor-regulated gene 2  | <a href="#">Narg2</a>         | 0.967 | -0.84  | 0.428081 | 0.689167 |
| 11510 | 10415017 |                                    |                        |                                 |                               | 0.967 | -0.01  | 0.992568 | 0.997143 |
| 11511 | 10466165 | <a href="#">XM_355147</a>          | <a href="#">381213</a> | membrane-spanning 4-domains, s  | <a href="#">Ms4a12</a>        | 0.967 | -0.123 | 0.905112 | 0.963148 |
| 11512 | 10511190 | <a href="#">NM_010091</a>          | <a href="#">13542</a>  | dishevelled, dsh homolog 1 (Dr  | <a href="#">Dvl1</a>          | 0.967 | -0.586 | 0.575896 | 0.797128 |
| 11513 | 10448030 | <a href="#">XR_004875</a>          | <a href="#">676111</a> | similar to Ubiquitin-conjugati  | <a href="#">LOC676111</a>     | 0.967 | -0.637 | 0.543659 | 0.775859 |
| 11514 | 10551104 | <a href="#">NM_183311</a>          | <a href="#">330485</a> | transmembrane protein 145       | <a href="#">Tmem145</a>       | 0.967 | -0.946 | 0.374803 | 0.64482  |
| 11515 | 10560414 | <a href="#">NM_001033314</a>       | <a href="#">232933</a> | coiled-coil domain containing   | <a href="#">Cede61</a>        | 0.967 | -0.612 | 0.559212 | 0.786667 |
| 11516 | 10524698 | <a href="#">NM_011107</a>          | <a href="#">18778</a>  | phospholipase A2, group IB, pa  | <a href="#">Pla2g1b</a>       | 0.967 | -0.197 | 0.849181 | 0.939006 |
| 11517 | 10349968 | <a href="#">NM_007695</a>          | <a href="#">12654</a>  | chitinase 3-like 1              | <a href="#">Chi3l1</a>        | 0.967 | -0.426 | 0.682235 | 0.859614 |
| 11518 | 10520173 | <a href="#">NM_183000</a>          | <a href="#">171209</a> | amiloride-sensitive cation cha  | <a href="#">Accn3</a>         | 0.967 | -0.286 | 0.782753 | 0.911674 |
| 11519 | 10431124 | <a href="#">NM_029427</a>          | <a href="#">75772</a>  | patatin-like phospholipase dom  | <a href="#">Pnpla5</a>        | 0.967 | 0.025  | 0.980611 | 0.991919 |
| 11520 | 10448355 | <a href="#">NM_028416</a>          | <a href="#">73016</a>  | kringle containing transmembra  | <a href="#">Kremen2</a>       | 0.967 | -0.147 | 0.887281 | 0.955613 |
| 11521 | 10468828 | <a href="#">NM_010123</a>          | <a href="#">13669</a>  | eukaryotic translation initiat  | <a href="#">Eif3s10</a>       | 0.967 | -1.123 | 0.297382 | 0.573687 |
| 11522 | 10441973 | <a href="#">NM_013684</a>          | <a href="#">21374</a>  | TATA box binding protein        | <a href="#">Tbp</a>           | 0.967 | -0.923 | 0.385722 | 0.654755 |
| 11523 | 10607419 |                                    |                        |                                 |                               | 0.967 | -1.57  | 0.159234 | 0.406366 |
| 11524 | 10379228 | <a href="#">NM_010927</a>          | <a href="#">18126</a>  | nitric oxide synthase 2, induc  | <a href="#">Nos2</a>          | 0.967 | -0.769 | 0.466358 | 0.719571 |
| 11525 | 10548684 | <a href="#">XR_034780</a>          | <a href="#">622962</a> | similar to actin                | <a href="#">LOC622962</a>     | 0.967 | -0.41  | 0.693647 | 0.865705 |
| 11526 | 10510880 | <a href="#">ENSMUST00000071251</a> | <a href="#">230971</a> | multiple EGF-like-domains 6     | <a href="#">Megf6</a>         | 0.967 | -0.202 | 0.845122 | 0.937084 |
| 11527 | 10493585 | <a href="#">NM_027315</a>          | <a href="#">70093</a>  | ubiquitin-conjugating enzyme E  | <a href="#">Ube2q1</a>        | 0.967 | -1.21  | 0.264536 | 0.539638 |
| 11528 | 10507931 |                                    |                        |                                 |                               | 0.967 | -0.245 | 0.813626 | 0.925035 |
| 11529 | 10403577 |                                    |                        |                                 |                               | 0.967 | -0.191 | 0.853585 | 0.940713 |
| 11530 | 10571739 |                                    |                        |                                 |                               | 0.967 | -0.505 | 0.628809 | 0.831023 |
| 11531 | 10514491 | <a href="#">NM_001100182</a>       | <a href="#">242546</a> | cytochrome P450, family 2, sub  | <a href="#">Cyp2j12</a>       | 0.967 | -0.119 | 0.908193 | 0.963723 |
| 11532 | 10597656 | <a href="#">NM_021544</a>          | <a href="#">20271</a>  | sodium channel, voltage-gated,  | <a href="#">Scn5a</a>         | 0.967 | -0.394 | 0.70491  | 0.871105 |
| 11533 | 10375901 |                                    |                        |                                 |                               | 0.966 | -0.378 | 0.716575 | 0.875798 |
| 11534 | 10476108 | <a href="#">NM_001110513</a>       | <a href="#">228598</a> | early B-cell factor 4           | <a href="#">Ebf4</a>          | 0.966 | -0.548 | 0.600289 | 0.812216 |
| 11535 | 10461526 | <a href="#">BC043473</a>           | <a href="#">71768</a>  | von Willebrand factor C and EG  | <a href="#">Vwce</a>          | 0.966 | -0.414 | 0.691109 | 0.86451  |
| 11536 | 10367624 |                                    |                        |                                 |                               | 0.966 | -0.078 | 0.940234 | 0.976727 |
| 11537 | 10393714 | <a href="#">NM_183137</a>          | <a href="#">78777</a>  | RIKEN cDNA 2410002I01 gene      | <a href="#">2410002I01Rik</a> | 0.966 | -0.269 | 0.795432 | 0.916955 |
| 11538 | 10420165 | <a href="#">NM_009894</a>          | <a href="#">12684</a>  | cell death-inducing DNA fragme  | <a href="#">Cideb</a>         | 0.966 | -0.245 | 0.813297 | 0.9249   |
| 11539 | 10462096 |                                    |                        |                                 |                               | 0.966 | 0.047  | 0.964136 | 0.985864 |
| 11540 | 10505436 |                                    |                        |                                 |                               | 0.966 | 0.065  | 0.950009 | 0.980663 |

|       |          |                                    |                           |                                   |                                    |       |        |          |          |
|-------|----------|------------------------------------|---------------------------|-----------------------------------|------------------------------------|-------|--------|----------|----------|
| 11541 | 10604653 | <a href="#">NM_001009549</a>       | <a href="#">333473</a>    | zinc finger protein 36, C3H ty    | <a href="#">Zfp36l3</a>            | 0.966 | -0.503 | 0.630039 | 0.831349 |
| 11542 | 10408081 | <a href="#">NM_020034</a>          | <a href="#">56702</a>     | histone cluster 1, H1b            | <a href="#">Hist1h1b</a>           | 0.966 | -1.173 | 0.27809  | 0.55314  |
| 11543 | 10566306 | <a href="#">NM_198623</a>          | <a href="#">244178</a>    | ubiquilin 3                       | <a href="#">Ubqln3</a>             | 0.966 | -0.29  | 0.779632 | 0.910547 |
| 11544 | 10381361 | <a href="#">NM_178932</a>          | <a href="#">237940</a>    | amine oxidase, copper containi    | <a href="#">Aoc2</a>               | 0.966 | -0.496 | 0.634419 | 0.833748 |
| 11545 | 10478355 | <a href="#">NM_008652</a>          | <a href="#">17865</a>     | myeloblastosis oncogene-like 2    | <a href="#">Mybl2</a>              | 0.966 | -0.662 | 0.528747 | 0.764097 |
| 11546 | 10596023 | <a href="#">ENSMUST00000054819</a> | <a href="#">20669</a>     | SRY-box containing gene 14        | <a href="#">Sox14</a>              | 0.966 | -0.117 | 0.910001 | 0.964056 |
| 11547 | 10523206 | <a href="#">NM_019490</a>          | <a href="#">56041</a>     | USO1 homolog, vesicle docking     | <a href="#">Uso1</a>               | 0.966 | -1.065 | 0.321164 | 0.598048 |
| 11548 | 10540012 | <a href="#">NM_173002</a>          | <a href="#">80292</a>     | ZXD family zinc finger C          | <a href="#">Zxdc</a>               | 0.966 | -0.658 | 0.530851 | 0.76539  |
| 11549 | 10449932 | <a href="#">XR_034756</a>          | <a href="#">631266</a>    | similar to ribosomal protein L    | <a href="#">LOC631266</a>          | 0.966 | -0.615 | 0.557446 | 0.785582 |
| 11550 | 10578962 | <a href="#">ENSMUST00000098707</a> | <a href="#">100038435</a> | predicted gene,<br>ENSMUSG0000007 | <a href="#">ENSMUSG00000074294</a> | 0.966 | -0.471 | 0.651364 | 0.843859 |
| 11551 | 10487685 | <a href="#">NM_009732</a>          | <a href="#">11998</a>     | arginine vasopressin              | <a href="#">Avp</a>                | 0.966 | -0.178 | 0.863536 | 0.94565  |
| 11552 | 10607718 | <a href="#">NR_003640</a>          | <a href="#">74264</a>     | RIKEN cDNA 1700045119 gene        | <a href="#">1700045119Rik</a>      | 0.966 | -0.335 | 0.747231 | 0.892524 |
| 11553 | 10552604 | <a href="#">NM_010643</a>          | <a href="#">16617</a>     | kallikrein 1-related peptidase    | <a href="#">Klk1b24</a>            | 0.966 | -0.252 | 0.808138 | 0.922738 |
| 11554 | 10547386 | <a href="#">NM_197985</a>          | <a href="#">68465</a>     | adiponectin receptor 2            | <a href="#">Adipor2</a>            | 0.966 | -0.77  | 0.465527 | 0.719157 |
| 11555 | 10410560 | <a href="#">NM_027182</a>          | <a href="#">69716</a>     | thyroid hormone receptor inter    | <a href="#">Trip13</a>             | 0.966 | -0.928 | 0.383437 | 0.652869 |
| 11556 | 10451033 | <a href="#">NM_198418</a>          | <a href="#">210510</a>    | tudor domain containing 6         | <a href="#">Tdrd6</a>              | 0.966 | -0.371 | 0.721433 | 0.878683 |
| 11557 | 10576158 |                                    |                           |                                   |                                    | 0.966 | -0.422 | 0.685511 | 0.861073 |
| 11558 | 10569069 | <a href="#">XR_034790</a>          | <a href="#">546015</a>    | similar to ribosomal protein S    | <a href="#">LOC546015</a>          | 0.966 | -0.899 | 0.397555 | 0.664302 |
| 11559 | 10589113 | <a href="#">NM_030729</a>          | <a href="#">80987</a>     | NCK interacting protein with S    | <a href="#">Nckipsd</a>            | 0.966 | -0.348 | 0.737818 | 0.888255 |
| 11560 | 10606001 | <a href="#">NM_001110310</a>       | <a href="#">55988</a>     | sorting nexin 12                  | <a href="#">Snx12</a>              | 0.966 | -1.175 | 0.277212 | 0.552231 |
| 11561 | 10579939 | <a href="#">NM_027554</a>          | <a href="#">74841</a>     | ubiquitin specific peptidase 3    | <a href="#">Usp38</a>              | 0.966 | -0.956 | 0.369964 | 0.640508 |
| 11562 | 10433207 |                                    |                           |                                   |                                    | 0.966 | -0.12  | 0.908138 | 0.963723 |
| 11563 | 10586773 | <a href="#">NM_001039519</a>       | <a href="#">235459</a>    | general transcription factor I    | <a href="#">Gtf2a2</a>             | 0.966 | -0.836 | 0.429745 | 0.690652 |
| 11564 | 10532839 | <a href="#">NM_022017</a>          | <a href="#">63873</a>     | transient receptor potential c    | <a href="#">Trpv4</a>              | 0.966 | -0.318 | 0.759774 | 0.899364 |
| 11565 | 10447082 | <a href="#">ENSMUST00000066194</a> | <a href="#">73265</a>     | RIKEN cDNA 1700038P13 gene        | <a href="#">1700038P13Rik</a>      | 0.966 | -0.606 | 0.563163 | 0.789853 |
| 11566 | 10562050 | <a href="#">NM_026815</a>          | <a href="#">109637</a>    | uroplakin 1A                      | <a href="#">Upk1a</a>              | 0.966 | -0.23  | 0.824369 | 0.929508 |
| 11567 | 10557372 | <a href="#">AK052528</a>           | <a href="#">233865</a>    | RIKEN cDNA D430042O09<br>gene     | <a href="#">D430042O09Rik</a>      | 0.966 | -0.218 | 0.83347  | 0.932911 |
| 11568 | 10381140 | <a href="#">NM_028918</a>          | <a href="#">74407</a>     | tetratricopeptide repeat domai    | <a href="#">Ttc25</a>              | 0.966 | -0.531 | 0.611555 | 0.819829 |
| 11569 | 10384662 | <a href="#">NM_144514</a>          | <a href="#">17846</a>     | COMM domain containing 1          | <a href="#">Comm1</a>              | 0.966 | -0.999 | 0.350059 | 0.623549 |
| 11570 | 10598154 | <a href="#">AF067063</a>           | <a href="#">380878</a>    | cDNA sequence AF067063            | <a href="#">AF067063</a>           | 0.966 | -0.218 | 0.83338  | 0.932893 |
| 11571 | 10348556 | <a href="#">XR_032669</a>          | <a href="#">665783</a>    | similar to Zinc finger protein    | <a href="#">LOC665783</a>          | 0.966 | -0.149 | 0.885423 | 0.955173 |
| 11572 | 10349773 | <a href="#">NM_144810</a>          | <a href="#">213417</a>    | kelch domain containing 8A        | <a href="#">Klhdc8a</a>            | 0.966 | -0.306 | 0.768179 | 0.90369  |
| 11573 | 10363346 | <a href="#">NM_172939</a>          | <a href="#">268301</a>    | ankyrin repeat domain 57          | <a href="#">Ankrd57</a>            | 0.966 | -0.507 | 0.627056 | 0.830395 |
| 11574 | 10562818 | <a href="#">NM_011131</a>          | <a href="#">18971</a>     | polymerase (DNA directed), del    | <a href="#">Pold1</a>              | 0.966 | -0.732 | 0.487346 | 0.734981 |
| 11575 | 10345099 | <a href="#">AK005585</a>           | <a href="#">68002</a>     | RIKEN cDNA 1110058L19 gene        | <a href="#">1110058L19Rik</a>      | 0.966 | -0.548 | 0.600196 | 0.812161 |
| 11576 | 10551841 | <a href="#">NM_027259</a>          | <a href="#">69920</a>     | polymerase (RNA) II (DNA<br>direc | <a href="#">Polr2i</a>             | 0.966 | -0.977 | 0.360145 | 0.632213 |
| 11577 | 10545993 | <a href="#">NM_025466</a>          | <a href="#">66283</a>     | gastrokine 1                      | <a href="#">Gkn1</a>               | 0.966 | -0.339 | 0.744556 | 0.891476 |
| 11578 | 10387257 | <a href="#">NM_009661</a>          | <a href="#">11688</a>     | arachidonate 8-lipoxygenase       | <a href="#">Alox8</a>              | 0.966 | -0.57  | 0.585694 | 0.80308  |
| 11579 | 10576029 | <a href="#">NM_009941</a>          | <a href="#">12857</a>     | cytochrome c oxidase subunit I    | <a href="#">Cox4i1</a>             | 0.966 | -0.953 | 0.371657 | 0.64202  |
| 11580 | 10497045 |                                    |                           |                                   |                                    | 0.966 | -0.673 | 0.521879 | 0.758967 |
| 11581 | 10423293 | <a href="#">NM_019472</a>          | <a href="#">17909</a>     | myosin X                          | <a href="#">Myo10</a>              | 0.966 | -0.694 | 0.509123 | 0.750516 |
| 11582 | 10521583 | <a href="#">NM_013503</a>          | <a href="#">13492</a>     | dopamine receptor 5               | <a href="#">Drd5</a>               | 0.966 | -0.123 | 0.905115 | 0.963148 |
| 11583 | 10387638 | <a href="#">NM_010198</a>          | <a href="#">14166</a>     | fibroblast growth factor 11       | <a href="#">Fgf11</a>              | 0.966 | -0.5   | 0.631904 | 0.832719 |
| 11584 | 10465587 | <a href="#">NM_153795</a>          | <a href="#">108101</a>    | fermitin family homolog 3 (Dro    | <a href="#">Fermt3</a>             | 0.966 | -0.811 | 0.443559 | 0.702308 |
| 11585 | 10453600 | <a href="#">XR_030739</a>          | <a href="#">621501</a>    | predicted gene, EG621501          | <a href="#">EG621501</a>           | 0.966 | -0.705 | 0.502762 | 0.745575 |
| 11586 | 10370013 | <a href="#">NM_010361</a>          | <a href="#">14872</a>     | glutathione S-transferase, the    | <a href="#">Gst2</a>               | 0.966 | -0.47  | 0.652328 | 0.844168 |
| 11587 | 10397081 | <a href="#">NM_027349</a>          | <a href="#">67039</a>     | RNA binding motif protein 25      | <a href="#">Rbm25</a>              | 0.966 | -0.791 | 0.454366 | 0.710796 |
| 11588 | 10374032 |                                    |                           |                                   |                                    | 0.966 | -0.203 | 0.844775 | 0.936998 |
| 11589 | 10575702 | <a href="#">NM_001007223</a>       | <a href="#">403395</a>    | C-type lectin domain family 3,    | <a href="#">Clec3a</a>             | 0.966 | -0.365 | 0.725897 | 0.88133  |
| 11590 | 10570119 | <a href="#">BC019538</a>           | <a href="#">69225</a>     | RIKEN cDNA 0710008K08<br>gene     | <a href="#">0710008K08Rik</a>      | 0.966 | -0.445 | 0.669162 | 0.852809 |
| 11591 | 10415911 | <a href="#">NM_001081177</a>       | <a href="#">16554</a>     | kinesin family member 13B         | <a href="#">Kif13b</a>             | 0.966 | -0.681 | 0.516944 | 0.756158 |
| 11592 | 10445378 |                                    |                           |                                   |                                    | 0.966 | -0.453 | 0.664115 | 0.850267 |
| 11593 | 10469035 | <a href="#">NM_175400</a>          | <a href="#">109079</a>    | selenophosphate synthetase 1      | <a href="#">Sephs1</a>             | 0.966 | -0.984 | 0.356895 | 0.629197 |
| 11594 | 10434888 | <a href="#">NM_133752</a>          | <a href="#">74143</a>     | optic atrophy 1 homolog (human    | <a href="#">Opa1</a>               | 0.966 | -0.946 | 0.374583 | 0.644557 |

|       |          |                                    |                           |                                       |                                    |       |        |          |          |
|-------|----------|------------------------------------|---------------------------|---------------------------------------|------------------------------------|-------|--------|----------|----------|
| 11595 | 10524411 | <a href="#">NM_001010825</a>       | <a href="#">231630</a>    | FIC domain containing                 | <a href="#">Ficd</a>               | 0.966 | -0.817 | 0.439971 | 0.699124 |
| 11596 | 10565241 | <a href="#">BC061016</a>           | <a href="#">75556</a>     | RIKEN cDNA 1700026D08 gene            | <a href="#">1700026D08Rik</a>      | 0.966 | -0.093 | 0.928593 | 0.971893 |
| 11597 | 10507914 | <a href="#">NM_029157</a>          | <a href="#">75062</a>     | splicing factor 3a, subunit 3         | <a href="#">Sf3a3</a>              | 0.966 | -0.944 | 0.375682 | 0.645773 |
| 11598 | 10370780 | <a href="#">NM_008793</a>          | <a href="#">18551</a>     | proprotein convertase subtilis        | <a href="#">Pcsk4</a>              | 0.966 | -0.379 | 0.715839 | 0.875402 |
| 11599 | 10467941 | <a href="#">NM_001081077</a>       | <a href="#">72502</a>     | CWF19-like 1, cell cycle contr        | <a href="#">Cwf19l1</a>            | 0.966 | -1.064 | 0.321808 | 0.598601 |
| 11600 | 10578149 | <a href="#">NM_026609</a>          | <a href="#">68192</a>     | leptin receptor overlapping tr        | <a href="#">Leprot1l</a>           | 0.966 | -0.726 | 0.490679 | 0.737369 |
| 11601 | 10572109 | <a href="#">NM_027590</a>          | <a href="#">70885</a>     | integrator complex subunit 10         | <a href="#">Ints10</a>             | 0.966 | -0.922 | 0.386399 | 0.655384 |
| 11602 | 10405545 | <a href="#">NM_028281</a>          | <a href="#">72562</a>     | pterin 4 alpha carbinolamine d        | <a href="#">Pcbd2</a>              | 0.966 | -0.437 | 0.674952 | 0.855557 |
| 11603 | 10414487 | <a href="#">NM_001011738</a>       | <a href="#">257884</a>    | olfactory receptor 744                | <a href="#">Olfr744</a>            | 0.966 | 0.172  | 0.868106 | 0.947171 |
| 11604 | 10348072 | <a href="#">ENSMUST00000097665</a> | <a href="#">319336</a>    | RIKEN cDNA C130036L24 gene            | <a href="#">C130036L24Rik</a>      | 0.966 | -0.105 | 0.919537 | 0.967948 |
| 11605 | 10417836 | <a href="#">NM_025440</a>          | <a href="#">66242</a>     | mitochondrial ribosomal protei        | <a href="#">Mrps16</a>             | 0.966 | -0.825 | 0.435708 | 0.695606 |
| 11606 | 10598069 | <a href="#">ENSMUST00000082421</a> | <a href="#">17711</a>     | cytochrome b                          | <a href="#">CYTB</a>               | 0.966 | -0.783 | 0.458802 | 0.713797 |
| 11607 | 10563745 | <a href="#">NM_0207538</a>         | <a href="#">404239</a>    | MAS-related GPR, member B5            | <a href="#">Mrgprb5</a>            | 0.966 | -0.322 | 0.756323 | 0.897871 |
| 11608 | 10515012 | <a href="#">NM_172697</a>          | <a href="#">230596</a>    | PRP38 pre-mRNA processing fact        | <a href="#">Prpf38a</a>            | 0.966 | -1.281 | 0.239912 | 0.512931 |
| 11609 | 10516723 | <a href="#">NM_198959</a>          | <a href="#">230777</a>    | hypocretin (orexin) receptor 1        | <a href="#">Hcrtr1</a>             | 0.966 | -0.445 | 0.669055 | 0.852809 |
| 11610 | 10366350 | <a href="#">NM_178610</a>          | <a href="#">52705</a>     | KRR1, small subunit (SSU) proc        | <a href="#">Krr1</a>               | 0.966 | -1.221 | 0.26032  | 0.534856 |
| 11611 | 10365127 | <a href="#">BC117023</a>           | <a href="#">72273</a>     | RIKEN cDNA 2210404O07 gene            | <a href="#">2210404O07Rik</a>      | 0.966 | -0.754 | 0.474851 | 0.726501 |
| 11612 | 10401713 | <a href="#">NM_153415</a>          | <a href="#">217734</a>    | protein-O-mannosyltransferase         | <a href="#">Pomt2</a>              | 0.966 | -0.693 | 0.510193 | 0.751325 |
| 11613 | 10401335 | <a href="#">NM_027213</a>          | <a href="#">69792</a>     | mediator of RNA polymerase II         | <a href="#">Med6</a>               | 0.966 | -0.769 | 0.466079 | 0.719571 |
| 11614 | 10557361 | <a href="#">BC042743</a>           | <a href="#">233865</a>    | RIKEN cDNA D430042O09 gene            | <a href="#">D430042O09Rik</a>      | 0.966 | -0.713 | 0.498043 | 0.742207 |
| 11615 | 10516238 |                                    |                           |                                       |                                    | 0.965 | -0.858 | 0.418445 | 0.681004 |
| 11616 | 10561664 | <a href="#">BC023421</a>           | <a href="#">73833</a>     | RIKEN cDNA 1110006G06 gene            | <a href="#">1110006G06Rik</a>      | 0.965 | -0.352 | 0.735007 | 0.886784 |
| 11617 | 10362171 | <a href="#">NM_016797</a>          | <a href="#">53331</a>     | syntaxin 7                            | <a href="#">Stx7</a>               | 0.965 | -0.691 | 0.510992 | 0.752038 |
| 11618 | 10354207 | <a href="#">NM_170597</a>          | <a href="#">263764</a>    | cellular repressor of E1A-stim        | <a href="#">Creg2</a>              | 0.965 | -0.254 | 0.806689 | 0.921832 |
| 11619 | 10574423 | <a href="#">ENSMUST00000064349</a> | <a href="#">234624</a>    | RIKEN cDNA A330008L17 gene            | <a href="#">A330008L17Rik</a>      | 0.965 | -0.17  | 0.869906 | 0.947912 |
| 11620 | 10407255 | <a href="#">NM_001037914</a>       | <a href="#">622408</a>    | predicted gene, EG622408              | <a href="#">EG622408</a>           | 0.965 | -0.769 | 0.46639  | 0.719571 |
| 11621 | 10507101 | <a href="#">NM_001085549</a>       | <a href="#">666048</a>    | predicted gene,<br>OTTMUSG00000008561 | <a href="#">OTTMUSG00000008561</a> | 0.965 | -0.228 | 0.825932 | 0.929952 |
| 11622 | 10383632 | <a href="#">NM_030207</a>          | <a href="#">78887</a>     | Sfi1 homolog, spindle assembly        | <a href="#">Sfi1</a>               | 0.965 | -0.175 | 0.8661   | 0.946491 |
| 11623 | 10447725 | <a href="#">U44941</a>             | <a href="#">19317</a>     | quaking                               | <a href="#">Qk</a>                 | 0.965 | -0.737 | 0.48432  | 0.732823 |
| 11624 | 10413771 | <a href="#">NM_009796</a>          | <a href="#">12339</a>     | calpain 7                             | <a href="#">Capn7</a>              | 0.965 | -0.712 | 0.499061 | 0.742429 |
| 11625 | 10445983 | <a href="#">NM_028381</a>          | <a href="#">72886</a>     | coiled-coil domain containing         | <a href="#">Ccdc94</a>             | 0.965 | -0.659 | 0.53054  | 0.765382 |
| 11626 | 10385048 | <a href="#">NM_019916</a>          | <a href="#">27140</a>     | T-cell leukemia, homeobox 3           | <a href="#">Tlx3</a>               | 0.965 | -0.593 | 0.571193 | 0.795344 |
| 11627 | 10552982 | <a href="#">NM_148927</a>          | <a href="#">69217</a>     | pleckstrin homology domain con        | <a href="#">Plekha4</a>            | 0.965 | -0.274 | 0.791705 | 0.915198 |
| 11628 | 10423291 | <a href="#">NM_001013791</a>       | <a href="#">432939</a>    | predicted gene, EG432939              | <a href="#">EG432939</a>           | 0.965 | -0.159 | 0.877732 | 0.951715 |
| 11629 | 10453575 | <a href="#">NM_029402</a>          | <a href="#">71745</a>     | cullin 2                              | <a href="#">Cul2</a>               | 0.965 | -1.056 | 0.324941 | 0.601308 |
| 11630 | 10503534 | <a href="#">NM_016746</a>          | <a href="#">51813</a>     | cyclin C                              | <a href="#">Cnc</a>                | 0.965 | -0.61  | 0.560731 | 0.78784  |
| 11631 | 10556812 | <a href="#">NM_029610</a>          | <a href="#">73919</a>     | LYR motif containing 1                | <a href="#">Lym1</a>               | 0.965 | -0.527 | 0.614288 | 0.821474 |
| 11632 | 10503828 | <a href="#">NM_175364</a>          | <a href="#">108755</a>    | LYR motif containing 2                | <a href="#">Lym2</a>               | 0.965 | -1.04  | 0.332149 | 0.608213 |
| 11633 | 10583199 |                                    |                           |                                       |                                    | 0.965 | -0.286 | 0.782847 | 0.911733 |
| 11634 | 10579974 |                                    |                           |                                       |                                    | 0.965 | -0.769 | 0.466304 | 0.719571 |
| 11635 | 10545182 | <a href="#">ENSMUST00000103337</a> | <a href="#">243451</a>    | gene model 459, (NCBI)                | <a href="#">Gm459</a>              | 0.965 | -0.119 | 0.908479 | 0.963723 |
| 11636 | 10376568 | <a href="#">NM_009021</a>          | <a href="#">19377</a>     | retinoic acid induced 1               | <a href="#">Rai1</a>               | 0.965 | -0.603 | 0.565075 | 0.791097 |
| 11637 | 10363415 | <a href="#">NM_052994</a>          | <a href="#">94214</a>     | sparc/osteonectin, cwcv and ka        | <a href="#">Spock2</a>             | 0.965 | -0.725 | 0.491109 | 0.737687 |
| 11638 | 10586368 | <a href="#">NM_011802</a>          | <a href="#">270166</a>    | caseinolytic peptidase X (E.co        | <a href="#">Clpx</a>               | 0.965 | -0.971 | 0.362938 | 0.63431  |
| 11639 | 10346146 | <a href="#">XM_001487804</a>       | <a href="#">666962</a>    | predicted gene, EG666962              | <a href="#">EG666962</a>           | 0.965 | -0.526 | 0.614657 | 0.821667 |
| 11640 | 10517312 | <a href="#">NM_025382</a>          | <a href="#">66146</a>     | transmembrane protein 57              | <a href="#">Tmem57</a>             | 0.965 | -0.875 | 0.409904 | 0.674344 |
| 11641 | 10594289 | <a href="#">NM_033320</a>          | <a href="#">93683</a>     | glucuronyl C5-epimerase               | <a href="#">Glee</a>               | 0.965 | -0.773 | 0.464025 | 0.717953 |
| 11642 | 10537506 | <a href="#">NM_146383</a>          | <a href="#">258381</a>    | olfactory receptor 460                | <a href="#">Olfr460</a>            | 0.965 | -0.94  | 0.377499 | 0.647352 |
| 11643 | 10360460 | <a href="#">NM_021350</a>          | <a href="#">12663</a>     | choroideremia-like                    | <a href="#">Chml</a>               | 0.965 | -0.86  | 0.417601 | 0.680363 |
| 11644 | 10571045 | <a href="#">AK090261</a>           | <a href="#">100038760</a> | predicted gene,<br>ENSMUSG0000005     | <a href="#">ENSMUSG00000054427</a> | 0.965 | -1.438 | 0.192327 | 0.451739 |

|       |          |                                    |                        |                                        |                               |       |        |          |          |
|-------|----------|------------------------------------|------------------------|----------------------------------------|-------------------------------|-------|--------|----------|----------|
| 11645 | 10552871 | <a href="#">NM_053256</a>          | <a href="#">114640</a> | parathyroid hormone 2                  | <a href="#">Pth2</a>          | 0.965 | -0.517 | 0.620703 | 0.82573  |
| 11646 | 10574143 |                                    |                        |                                        |                               | 0.965 | -0.421 | 0.686092 | 0.861394 |
| 11647 | 10567458 | <a href="#">XM_355934</a>          | <a href="#">381917</a> | dynein, axonemal, heavy chain          | <a href="#">Dnahc3</a>        | 0.965 | -0.663 | 0.527737 | 0.763341 |
| 11648 | 10543492 | <a href="#">XR_032094</a>          | <a href="#">626912</a> | predicted gene, EG626912               | <a href="#">EG626912</a>      | 0.965 | -0.573 | 0.584339 | 0.802134 |
| 11649 | 10532592 | <a href="#">XM_912851</a>          | <a href="#">74376</a>  | myosin XVIIIb                          | <a href="#">Myo18b</a>        | 0.965 | -0.377 | 0.717002 | 0.876165 |
| 11650 | 10392040 | <a href="#">NM_001039242</a>       | <a href="#">632687</a> | membrane-associated ring finger        | <a href="#">March10</a>       | 0.965 | -0.005 | 0.996064 | 0.998425 |
| 11651 | 10549402 | <a href="#">NM_026168</a>          | <a href="#">67456</a>  | ERGIC and golgi 2                      | <a href="#">Ergic2</a>        | 0.965 | -1.032 | 0.335511 | 0.611134 |
| 11652 | 10558580 | <a href="#">NM_009482</a>          | <a href="#">22286</a>  | undifferentiated embryonic cell        | <a href="#">Utf1</a>          | 0.965 | -0.742 | 0.481553 | 0.730886 |
| 11653 | 10371067 | <a href="#">NM_021501</a>          | <a href="#">59004</a>  | protein inhibitor of activated         | <a href="#">Pias4</a>         | 0.965 | -0.464 | 0.656312 | 0.846043 |
| 11654 | 10373890 | <a href="#">NM_134023</a>          | <a href="#">103724</a> | TBC1 domain family, member 10a         | <a href="#">Tbc1d10a</a>      | 0.965 | -0.507 | 0.62727  | 0.830494 |
| 11655 | 10421906 | <a href="#">BC085191</a>           | <a href="#">56419</a>  | diaphanous homolog 3 (Drosophila)      | <a href="#">Diap3</a>         | 0.965 | -0.193 | 0.852031 | 0.940258 |
| 11656 | 10513867 | <a href="#">ENSMUST00000098013</a> | <a href="#">214444</a> | CDK5 regulatory subunit associated     | <a href="#">Cdk5rap2</a>      | 0.965 | -1.082 | 0.314013 | 0.590842 |
| 11657 | 10458913 | <a href="#">NM_178686</a>          | <a href="#">225523</a> | coiled-coil domain containing          | <a href="#">Ccdc100</a>       | 0.965 | -1.154 | 0.285187 | 0.560488 |
| 11658 | 10574872 | <a href="#">BC125412</a>           | <a href="#">71046</a>  | RIKEN cDNA 4933405L10 gene             | <a href="#">4933405L10Rik</a> | 0.965 | 0.167  | 0.871665 | 0.948704 |
| 11659 | 10361680 |                                    |                        |                                        |                               | 0.965 | -0.403 | 0.698477 | 0.867855 |
| 11660 | 10567556 | <a href="#">NM_001040136</a>       | <a href="#">67983</a>  | RIKEN cDNA 4930408O21 gene             | <a href="#">4930408O21Rik</a> | 0.965 | -0.908 | 0.393381 | 0.661285 |
| 11661 | 10477935 | <a href="#">ENSMUST00000099140</a> | <a href="#">383766</a> | gene model 1332, (NCBI)                | <a href="#">Gm1332</a>        | 0.965 | -0.042 | 0.967269 | 0.987015 |
| 11662 | 10354220 | <a href="#">NM_172499</a>          | <a href="#">211798</a> | major facilitator superfamily          | <a href="#">Mfsd9</a>         | 0.965 | -0.584 | 0.576779 | 0.797659 |
| 11663 | 10581835 | <a href="#">NM_176923</a>          | <a href="#">319481</a> | WD repeat domain 59                    | <a href="#">Wdr59</a>         | 0.965 | -0.5   | 0.631944 | 0.83272  |
| 11664 | 10480956 | <a href="#">NM_001037747</a>       | <a href="#">332579</a> | caspase recruitment domain family      | <a href="#">Card9</a>         | 0.965 | -0.082 | 0.936542 | 0.975144 |
| 11665 | 10418247 | <a href="#">NM_178668</a>          | <a href="#">211948</a> | RIKEN cDNA E430028B21 gene             | <a href="#">E430028B21Rik</a> | 0.965 | -0.643 | 0.539891 | 0.772463 |
| 11666 | 10432404 | <a href="#">NM_011653</a>          | <a href="#">22142</a>  | tubulin, alpha 1A                      | <a href="#">Tuba1a</a>        | 0.965 | -0.964 | 0.366035 | 0.63705  |
| 11667 | 10363163 | <a href="#">NM_025541</a>          | <a href="#">66403</a>  | ASF1 anti-silencing function 1         | <a href="#">Asf1a</a>         | 0.965 | -0.91  | 0.392366 | 0.660367 |
| 11668 | 10391178 | <a href="#">NM_019795</a>          | <a href="#">56354</a>  | DnaJ (Hsp40) homolog, subfamily        | <a href="#">Dnajc7</a>        | 0.965 | -1.032 | 0.335592 | 0.611175 |
| 11669 | 10514732 | <a href="#">NM_177732</a>          | <a href="#">242585</a> | solute carrier family 35 (UDP-glucose) | <a href="#">Slc35d1</a>       | 0.965 | -0.387 | 0.709739 | 0.872992 |
| 11670 | 10364164 | <a href="#">NM_019434</a>          | <a href="#">54387</a>  | minichromosome maintenance domain      | <a href="#">Mcm3ap</a>        | 0.965 | -0.748 | 0.478023 | 0.728592 |
| 11671 | 10541186 | <a href="#">ENSMUST00000062454</a> | <a href="#">67289</a>  | RIKEN cDNA 3110021A11 gene             | <a href="#">3110021A11Rik</a> | 0.965 | -0.388 | 0.709327 | 0.87279  |
| 11672 | 10378424 |                                    |                        |                                        |                               | 0.965 | -0.234 | 0.821305 | 0.92863  |
| 11673 | 10448390 | <a href="#">NM_027644</a>          | <a href="#">71003</a>  | RIKEN cDNA 4931440B09 gene             | <a href="#">4931440B09Rik</a> | 0.965 | -0.67  | 0.523983 | 0.760561 |
| 11674 | 10442127 |                                    |                        |                                        |                               | 0.965 | -0.833 | 0.431818 | 0.69227  |
| 11675 | 10479556 | <a href="#">BC051628</a>           | <a href="#">332713</a> | cDNA sequence BC051628                 | <a href="#">BC051628</a>      | 0.965 | -0.147 | 0.887238 | 0.955613 |
| 11676 | 10532624 |                                    |                        |                                        |                               | 0.965 | -0.15  | 0.885189 | 0.954969 |
| 11677 | 10535369 | <a href="#">XR_034208</a>          | <a href="#">677204</a> | hypothetical protein LOC677204         | <a href="#">LOC677204</a>     | 0.965 | -0.846 | 0.424624 | 0.686672 |
| 11678 | 10386370 | <a href="#">NM_007476</a>          | <a href="#">11840</a>  | ADP-ribosylation factor 1              | <a href="#">Arl1</a>          | 0.965 | -0.617 | 0.556437 | 0.784877 |
| 11679 | 10561907 | <a href="#">NM_001033140</a>       | <a href="#">68332</a>  | RIKEN cDNA 0610010E21 gene             | <a href="#">0610010E21Rik</a> | 0.965 | -1.234 | 0.255843 | 0.530243 |
| 11680 | 10400357 | <a href="#">ENSMUST00000038926</a> | <a href="#">217578</a> | bromodomain adjacent to zinc finger    | <a href="#">Baz1a</a>         | 0.965 | -1.283 | 0.239257 | 0.512081 |
| 11681 | 10526302 | <a href="#">NM_013763</a>          | <a href="#">27368</a>  | transducin (beta)-like 2               | <a href="#">Tbl2</a>          | 0.965 | -0.868 | 0.41354  | 0.677091 |
| 11682 | 10593776 | <a href="#">NM_032002</a>          | <a href="#">83961</a>  | neuregulin 4                           | <a href="#">Nrg4</a>          | 0.965 | -0.368 | 0.723252 | 0.879946 |
| 11683 | 10520154 | <a href="#">NM_029020</a>          | <a href="#">74610</a>  | ATP-binding cassette, subfamily        | <a href="#">Abcb8</a>         | 0.965 | -0.686 | 0.514055 | 0.754437 |
| 11684 | 10553430 | <a href="#">NM_148931</a>          | <a href="#">104245</a> | solute carrier family 6 (neurospine)   | <a href="#">Slc6a5</a>        | 0.965 | -0.537 | 0.607462 | 0.817267 |
| 11685 | 10539433 | <a href="#">ENSMUST00000055261</a> | <a href="#">232157</a> | MOB1, Mps One Binder kinase associated | <a href="#">Mobk11b</a>       | 0.965 | -0.917 | 0.388679 | 0.657212 |
| 11686 | 10522530 | <a href="#">NM_001122733</a>       | <a href="#">16590</a>  | kit oncogene                           | <a href="#">Kit</a>           | 0.965 | -0.427 | 0.681892 | 0.859437 |
| 11687 | 10442155 | <a href="#">NM_016891</a>          | <a href="#">51792</a>  | protein phosphatase 2 (former)         | <a href="#">Ppp2r1a</a>       | 0.965 | -1.306 | 0.231518 | 0.502383 |
| 11688 | 10555789 | <a href="#">NM_010089</a>          | <a href="#">13532</a>  | deubiquitinating enzyme 2              | <a href="#">Dub2</a>          | 0.965 | 0.216  | 0.834977 | 0.933323 |
| 11689 | 10439891 | <a href="#">XR_035012</a>          | <a href="#">627543</a> | similar to eukaryotic translation      | <a href="#">LOC627543</a>     | 0.965 | -1.022 | 0.339889 | 0.61524  |
| 11690 | 10595402 | <a href="#">ENSMUST00000098501</a> | <a href="#">212943</a> | cDNA sequence BC023892                 | <a href="#">BC023892</a>      | 0.965 | 0.041  | 0.968781 | 0.987519 |
| 11691 | 10449356 | <a href="#">NM_001002895</a>       | <a href="#">106672</a> | expressed sequence AI413582            | <a href="#">AI413582</a>      | 0.965 | -0.282 | 0.785835 | 0.912599 |
| 11692 | 10589192 | <a href="#">BC111913</a>           | <a href="#">69384</a>  | transmembrane protein 89               | <a href="#">Tmem89</a>        | 0.965 | -0.778 | 0.461497 | 0.716124 |
| 11693 | 10511812 | <a href="#">NM_008899</a>          | <a href="#">18992</a>  | POU domain, class 3, transcription     | <a href="#">Pou3f2</a>        | 0.965 | -0.597 | 0.568845 | 0.79359  |
| 11694 | 10564337 | <a href="#">NM_023239</a>          | <a href="#">66647</a>  | necdin-like 2                          | <a href="#">Ndn2</a>          | 0.964 | -0.968 | 0.364258 | 0.635557 |
| 11695 | 10414460 | <a href="#">NM_001081430</a>       | <a href="#">70646</a>  | N-acetyltransferase 12                 | <a href="#">Nat12</a>         | 0.964 | -0.776 | 0.400513 | 0.737328 |

|       |          |                                    |                        |                                |                               |       |        |          |          |
|-------|----------|------------------------------------|------------------------|--------------------------------|-------------------------------|-------|--------|----------|----------|
| 11696 | 10348131 | <a href="#">NM_007432</a>          | <a href="#">11648</a>  | alkaline phosphatase 3, intest | <a href="#">Akp3</a>          | 0.964 | -0.284 | 0.784128 | 0.912068 |
| 11697 | 10577882 | <a href="#">NM_029884</a>          | <a href="#">52120</a>  | heparan-alpha-glucosaminide N- | <a href="#">Hgsnat</a>        | 0.964 | -1.471 | 0.183469 | 0.440626 |
| 11698 | 10499961 | <a href="#">NM_001007222</a>       | <a href="#">399673</a> | TD and POZ domain containing 2 | <a href="#">Tdpoz2</a>        | 0.964 | 0.316  | 0.760821 | 0.900213 |
| 11699 | 10534912 | <a href="#">NM_175521</a>          | <a href="#">243300</a> | RIKEN cDNA 6430598A04 gene     | <a href="#">6430598A04Rik</a> | 0.964 | -0.079 | 0.939299 | 0.976298 |
| 11700 | 10394749 | <a href="#">NM_001008421</a>       | <a href="#">217431</a> | nucleolar protein 10           | <a href="#">Nol10</a>         | 0.964 | -0.677 | 0.519585 | 0.757547 |
| 11701 | 10437399 | <a href="#">NM_030205</a>          | <a href="#">78885</a>  | coronin 7                      | <a href="#">Coro7</a>         | 0.964 | -1.039 | 0.332469 | 0.608528 |
| 11702 | 10429898 | <a href="#">NM_183099</a>          | <a href="#">73542</a>  | testis-specific serine kinase  | <a href="#">Tsk5</a>          | 0.964 | -0.341 | 0.743005 | 0.890544 |
| 11703 | 10366554 | <a href="#">NM_148922</a>          | <a href="#">17245</a>  | transformed mouse 3T3 cell dou | <a href="#">Mdm1</a>          | 0.964 | -0.493 | 0.636619 | 0.834887 |
| 11704 | 10518557 | <a href="#">NM_007745</a>          | <a href="#">12854</a>  | cortistatin                    | <a href="#">Cort</a>          | 0.964 | -0.321 | 0.757545 | 0.898154 |
| 11705 | 10439392 | <a href="#">NM_028812</a>          | <a href="#">74197</a>  | general transcription factor I | <a href="#">Gtf2e1</a>        | 0.964 | -0.942 | 0.376886 | 0.647069 |
| 11706 | 10446149 | <a href="#">NM_027933</a>          | <a href="#">71810</a>  | RAN binding protein 3          | <a href="#">Ranbp3</a>        | 0.964 | -0.768 | 0.467021 | 0.719977 |
| 11707 | 10389010 | <a href="#">BC055024</a>           | <a href="#">70591</a>  | RIKEN cDNA 5730455P16 gene     | <a href="#">5730455P16Rik</a> | 0.964 | -0.655 | 0.532685 | 0.766762 |
| 11708 | 10550889 | <a href="#">BC034211</a>           | <a href="#">71997</a>  | RIKEN cDNA 1500002O20 gene     | <a href="#">1500002O20Rik</a> | 0.964 | -0.387 | 0.710126 | 0.873031 |
| 11709 | 10506125 | <a href="#">NM_013913</a>          | <a href="#">30924</a>  | angiopoietin-like 3            | <a href="#">Angptl3</a>       | 0.964 | -0.542 | 0.604116 | 0.815116 |
| 11710 | 10373157 | <a href="#">NM_001003913</a>       | <a href="#">216443</a> | methionine-tRNA synthetase     | <a href="#">Mars</a>          | 0.964 | -0.865 | 0.415118 | 0.678399 |
| 11711 | 10374560 | <a href="#">NM_011663</a>          | <a href="#">22183</a>  | zinc finger (CCCH type), RNA b | <a href="#">Zrsr1</a>         | 0.964 | -0.544 | 0.602937 | 0.814375 |
| 11712 | 10602255 | <a href="#">NM_001033795</a>       | <a href="#">619287</a> | zinc finger, CCHC domain conta | <a href="#">Zcchc16</a>       | 0.964 | -0.201 | 0.846077 | 0.937284 |
| 11713 | 10569163 | <a href="#">NM_021316</a>          | <a href="#">57754</a>  | cell cycle exit and neuronal d | <a href="#">Cend1</a>         | 0.964 | -0.087 | 0.932806 | 0.973219 |
| 11714 | 10595909 |                                    |                        |                                |                               | 0.964 | -0.501 | 0.6311   | 0.832075 |
| 11715 | 10477353 | <a href="#">NM_007896</a>          | <a href="#">13589</a>  | microtubule-associated protein | <a href="#">Mapre1</a>        | 0.964 | -1.126 | 0.296059 | 0.572513 |
| 11716 | 10510861 | <a href="#">ENSMUST00000030897</a> | <a href="#">230971</a> | multiple EGF-like-domains 6    | <a href="#">Megf6</a>         | 0.964 | -0.601 | 0.566399 | 0.79227  |
| 11717 | 10357064 | <a href="#">NM_009190</a>          | <a href="#">20479</a>  | vacuolar protein sorting 4b (y | <a href="#">Vps4b</a>         | 0.964 | -1.223 | 0.2599   | 0.53415  |
| 11718 | 10461305 | <a href="#">NM_024256</a>          | <a href="#">72727</a>  | beta-1,3-glucuronyltransferase | <a href="#">B3gat3</a>        | 0.964 | -1.036 | 0.333746 | 0.609432 |
| 11719 | 10437257 | <a href="#">NM_001033159</a>       | <a href="#">71063</a>  | zinc finger protein 597        | <a href="#">Zfp597</a>        | 0.964 | -0.996 | 0.351638 | 0.624753 |
| 11720 | 10419274 | <a href="#">NM_022023</a>          | <a href="#">63985</a>  | glia maturation factor, beta   | <a href="#">Gmfb</a>          | 0.964 | -0.922 | 0.386256 | 0.655195 |
| 11721 | 10497167 |                                    |                        |                                |                               | 0.964 | -1.022 | 0.340026 | 0.615381 |
| 11722 | 10467315 | <a href="#">ENSMUST00000092265</a> | <a href="#">619304</a> | RIKEN cDNA I830134H01 gene     | <a href="#">I830134H01Rik</a> | 0.964 | -0.444 | 0.669908 | 0.853234 |
| 11723 | 10386495 | <a href="#">NM_153080</a>          | <a href="#">216810</a> | target of myb1-like 2 (chicken | <a href="#">Tom112</a>        | 0.964 | -0.827 | 0.434478 | 0.694903 |
| 11724 | 10516566 | <a href="#">NM_001033189</a>       | <a href="#">97130</a>  | expressed sequence C77080      | <a href="#">C77080</a>        | 0.964 | -0.341 | 0.742926 | 0.89053  |
| 11725 | 10351026 | <a href="#">NR_002840</a>          | <a href="#">14455</a>  | growth arrest specific 5       | <a href="#">Gas5</a>          | 0.964 | -0.742 | 0.481616 | 0.730928 |
| 11726 | 10525103 | <a href="#">NM_029408</a>          | <a href="#">75732</a>  | IQ motif containing D          | <a href="#">Iqcd</a>          | 0.964 | -0.842 | 0.426837 | 0.688211 |
| 11727 | 10568502 | <a href="#">NM_008411</a>          | <a href="#">16433</a>  | CUB and zona pellucida-like do | <a href="#">Cuzd1</a>         | 0.964 | -0.352 | 0.734896 | 0.886784 |
| 11728 | 10555834 | <a href="#">NM_146354</a>          | <a href="#">258351</a> | olfactory receptor 633         | <a href="#">Olfr633</a>       | 0.964 | 0.203  | 0.844913 | 0.937    |
| 11729 | 10472386 | <a href="#">NM_001099298</a>       | <a href="#">110876</a> | sodium channel, voltage-gated, | <a href="#">Scn2a1</a>        | 0.964 | -0.668 | 0.524732 | 0.761127 |
| 11730 | 10434117 | <a href="#">ENSMUST00000090145</a> | <a href="#">433004</a> | RIKEN cDNA B830017H08 gene     | <a href="#">B830017H08Rik</a> | 0.964 | -0.583 | 0.577418 | 0.797771 |
| 11731 | 10515739 | <a href="#">ENSMUST00000075406</a> | <a href="#">230676</a> | cDNA sequence BC059842         | <a href="#">BC059842</a>      | 0.964 | -1.001 | 0.349109 | 0.622715 |
| 11732 | 10509023 | <a href="#">NM_026780</a>          | <a href="#">68592</a>  | SYF2 homolog, RNA splicing fac | <a href="#">Syf2</a>          | 0.964 | -1.258 | 0.247537 | 0.520853 |
| 11733 | 10509030 | <a href="#">NM_019732</a>          | <a href="#">12399</a>  | runt related transcription fac | <a href="#">Runx3</a>         | 0.964 | -0.607 | 0.562717 | 0.789779 |
| 11734 | 10552553 | <a href="#">NM_029831</a>          | <a href="#">76999</a>  | RIKEN cDNA 1700127D06 gene     | <a href="#">1700127D06Rik</a> | 0.964 | -0.452 | 0.664523 | 0.850409 |
| 11735 | 10364460 | <a href="#">NM_008504</a>          | <a href="#">16904</a>  | granzyme M (lymphocyte met-ase | <a href="#">Gzmm</a>          | 0.964 | -0.549 | 0.599671 | 0.812038 |
| 11736 | 10416485 | <a href="#">XM_914736</a>          | <a href="#">380918</a> | gene model 912, (NCBI)         | <a href="#">Gm912</a>         | 0.964 | -0.091 | 0.930346 | 0.97262  |
| 11737 | 10462879 |                                    |                        |                                |                               | 0.964 | -0.392 | 0.706151 | 0.871814 |
| 11738 | 10355554 | <a href="#">NM_146110</a>          | <a href="#">227290</a> | angio-associated migratory pro | <a href="#">Aamp</a>          | 0.964 | -1.026 | 0.337969 | 0.613519 |
| 11739 | 10501199 | <a href="#">NM_026672</a>          | <a href="#">68312</a>  | glutathione S-transferase, mu  | <a href="#">Gstm7</a>         | 0.964 | -0.704 | 0.503417 | 0.745918 |
| 11740 | 10400668 | <a href="#">NM_025441</a>          | <a href="#">66244</a>  | serologically defined colon ca | <a href="#">Sdccag1</a>       | 0.964 | -1.108 | 0.303393 | 0.579489 |
| 11741 | 10353420 | <a href="#">NM_008563</a>          | <a href="#">17215</a>  | minichromosome maintenance def | <a href="#">Mcm3</a>          | 0.964 | -1.041 | 0.33156  | 0.607971 |
| 11742 | 10587503 | <a href="#">NM_172507</a>          | <a href="#">212531</a> | SH3 domain binding glutamic ac | <a href="#">Sh3bgrl2</a>      | 0.964 | -0.721 | 0.49333  | 0.739056 |
| 11743 | 10567788 | <a href="#">NM_001101488</a>       | <a href="#">269994</a> | GSGI-like                      | <a href="#">Gsg11</a>         | 0.964 | -0.332 | 0.749353 | 0.893972 |
| 11744 | 10568826 | <a href="#">ENSMUST00000074388</a> | <a href="#">664857</a> | RIKEN cDNA 9330101J02 gene     | <a href="#">9330101J02Rik</a> | 0.964 | -0.663 | 0.527703 | 0.763341 |
| 11745 | 10422075 | <a href="#">NM_207215</a>          | <a href="#">105689</a> | MYC binding protein 2          | <a href="#">Mycbp2</a>        | 0.964 | -0.784 | 0.457893 | 0.713313 |

|       |          |                                    |                        |                                |                                    |       |        |           |          |
|-------|----------|------------------------------------|------------------------|--------------------------------|------------------------------------|-------|--------|-----------|----------|
| 11746 | 1055740  | <a href="#">NM_024228</a>          | <a href="#">68616</a>  | glycerophosphodiester phospho  | <a href="#">Gdpd5</a>              | 0.964 | -0.436 | 0.675794  | 0.855911 |
| 11747 | 10386963 | <a href="#">AK086503</a>           | <a href="#">654805</a> | RIKEN cDNA F930015N05 gene     | <a href="#">F930015N05Rik</a>      | 0.964 | -0.346 | 0.738992  | 0.888726 |
| 11748 | 10570614 | <a href="#">NM_054074</a>          | <a href="#">116746</a> | defensin beta 6                | <a href="#">Defb6</a>              | 0.964 | -0.582 | 0.578297  | 0.798297 |
| 11749 | 10533106 | <a href="#">NM_172998</a>          | <a href="#">269695</a> | ring finger protein, transmemb | <a href="#">Rnft2</a>              | 0.964 | -0.229 | 0.824886  | 0.929565 |
| 11750 | 10604761 |                                    |                        |                                |                                    | 0.964 | -0.504 | 0.629263  | 0.831256 |
| 11751 | 10486448 | <a href="#">NM_001024145</a>       | <a href="#">271844</a> | phospholipase A2, group IVF    | <a href="#">Pla2g4f</a>            | 0.964 | -0.403 | 0.698519  | 0.867855 |
| 11752 | 10478421 | <a href="#">NM_001030292</a>       | <a href="#">241769</a> | potassium channel, subfamily K | <a href="#">Kcnk15</a>             | 0.964 | -1.082 | 0.314271  | 0.591082 |
| 11753 | 10401805 | <a href="#">NM_025507</a>          | <a href="#">66354</a>  | SNW domain containing 1        | <a href="#">Snw1</a>               | 0.964 | -0.976 | 0.36066   | 0.632426 |
| 11754 | 10413212 | <a href="#">NM_183208</a>          | <a href="#">328365</a> | zinc finger, MIZ-type containi | <a href="#">Zmiz1</a>              | 0.964 | -0.475 | 0.649099  | 0.842359 |
| 11755 | 10493484 | <a href="#">NM_025327</a>          | <a href="#">66059</a>  | keratinocyte associated protei | <a href="#">Krtcap2</a>            | 0.964 | -0.331 | 0.750165  | 0.894442 |
| 11756 | 10517573 | <a href="#">NM_026419</a>          | <a href="#">67868</a>  | elastase 3, pancreatic         | <a href="#">Ela3</a>               | 0.964 | -0.204 | 0.843761  | 0.936634 |
| 11757 | 10522658 |                                    |                        |                                |                                    | 0.964 | -0.782 | 0.459259  | 0.714171 |
| 11758 | 10592705 | <a href="#">NM_011139</a>          | <a href="#">18988</a>  | POU domain, class 2, transcrip | <a href="#">Pou2f3</a>             | 0.964 | -0.534 | 0.609084  | 0.818045 |
| 11759 | 10439523 | <a href="#">ENSMUST00000068934</a> | <a href="#">791329</a> | predicted gene, ENSMUSG0000005 | <a href="#">ENSMUSG00000055370</a> | 0.964 | -1.062 | 0.322556  | 0.599294 |
| 11760 | 10586157 | <a href="#">NM_024212</a>          | <a href="#">67891</a>  | ribosomal protein L4           | <a href="#">Rpl4</a>               | 0.964 | -1.05  | 0.327727  | 0.604012 |
| 11761 | 10356681 | <a href="#">NM_153114</a>          | <a href="#">260301</a> | otospiralin                    | <a href="#">Otos</a>               | 0.964 | -0.682 | 0.516828  | 0.756112 |
| 11762 | 10517090 | <a href="#">NM_001080819</a>       | <a href="#">93760</a>  | AT rich interactive domain 1A  | <a href="#">Arid1a</a>             | 0.964 | -0.856 | 0.419447  | 0.681847 |
| 11763 | 10388211 | <a href="#">NM_029932</a>          | <a href="#">77577</a>  | spinster homolog 3 (Drosophila | <a href="#">Spns3</a>              | 0.964 | -0.175 | 0.866057  | 0.946491 |
| 11764 | 10535184 | <a href="#">NM_025604</a>          | <a href="#">66506</a>  | proteasome (prosome, macropain | <a href="#">Psmg3</a>              | 0.963 | -1.994 | 0.0851986 | 0.280273 |
| 11765 | 10455017 | <a href="#">ENSMUST00000077710</a> | <a href="#">627427</a> | predicted gene, EG627427       | <a href="#">EG627427</a>           | 0.963 | -0.524 | 0.615821  | 0.822286 |
| 11766 | 10478994 | <a href="#">ENSMUST00000029007</a> | <a href="#">76426</a>  | RIKEN cDNA 1700029J11 gene     | <a href="#">1700029J11Rik</a>      | 0.963 | 0.229  | 0.825409  | 0.929756 |
| 11767 | 10376269 | <a href="#">NM_134189</a>          | <a href="#">171212</a> | UDP-N-acetyl-alpha-D-galactosa | <a href="#">Galnt10</a>            | 0.963 | -1.605 | 0.151266  | 0.395197 |
| 11768 | 10391378 | <a href="#">NM_007970</a>          | <a href="#">14055</a>  | enhancer of zeste homolog 1 (D | <a href="#">Ezh1</a>               | 0.963 | -0.326 | 0.753578  | 0.896207 |
| 11769 | 10416122 |                                    |                        |                                |                                    | 0.963 | -0.245 | 0.813576  | 0.925035 |
| 11770 | 10453811 | <a href="#">NM_001083628</a>       | <a href="#">381157</a> | cDNA sequence AK220484         | <a href="#">AK220484</a>           | 0.963 | -0.019 | 0.985249  | 0.993851 |
| 11771 | 10568180 | <a href="#">NM_027353</a>          | <a href="#">70233</a>  | CD2 antigen (cytoplasmic tail) | <a href="#">Cd2bp2</a>             | 0.963 | -0.799 | 0.449593  | 0.70698  |
| 11772 | 10570005 | <a href="#">ENSMUST00000048606</a> | <a href="#">66719</a>  | RIKEN cDNA 4921522P10 gene     | <a href="#">4921522P10Rik</a>      | 0.963 | -0.714 | 0.497843  | 0.741974 |
| 11773 | 10587368 | <a href="#">NM_026658</a>          | <a href="#">68291</a>  | mitochondrial translation opti | <a href="#">Mto1</a>               | 0.963 | -0.643 | 0.539878  | 0.772463 |
| 11774 | 10402564 | <a href="#">NM_028262</a>          | <a href="#">52690</a>  | SET domain containing 3        | <a href="#">Setd3</a>              | 0.963 | -1.072 | 0.318372  | 0.595538 |
| 11775 | 10538109 | <a href="#">BC145740</a>           | <a href="#">243373</a> | expressed sequence AI854703    | <a href="#">AI854703</a>           | 0.963 | -0.299 | 0.773566  | 0.9067   |
| 11776 | 10432695 | <a href="#">NM_001003668</a>       | <a href="#">406219</a> | keratin 83                     | <a href="#">Krt83</a>              | 0.963 | -0.226 | 0.827414  | 0.930659 |
| 11777 | 10489629 | <a href="#">NM_174988</a>          | <a href="#">104010</a> | cadherin 22                    | <a href="#">Cdh22</a>              | 0.963 | -0.601 | 0.56636   | 0.79227  |
| 11778 | 10388914 | <a href="#">NM_013571</a>          | <a href="#">16706</a>  | kinase suppressor of ras 1     | <a href="#">Ksr1</a>               | 0.963 | -0.613 | 0.55891   | 0.786425 |
| 11779 | 10479811 | <a href="#">NM_027290</a>          | <a href="#">70024</a>  | minichromosome maintenance def | <a href="#">Mcm10</a>              | 0.963 | -0.854 | 0.420597  | 0.68293  |
| 11780 | 10440564 | <a href="#">NM_001081068</a>       | <a href="#">78913</a>  | zinc finger protein 294        | <a href="#">Zfp294</a>             | 0.963 | -0.157 | 0.879336  | 0.952124 |
| 11781 | 10375903 | <a href="#">NM_029976</a>          | <a href="#">52626</a>  | CDKN2A interacting protein N-t | <a href="#">Cdkn2aipnl</a>         | 0.963 | -1.162 | 0.282102  | 0.557189 |
| 11782 | 10543442 | <a href="#">NM_026614</a>          | <a href="#">68202</a>  | NADH dehydrogenase (ubiquinone | <a href="#">Ndufa5</a>             | 0.963 | -1.082 | 0.31406   | 0.590842 |
| 11783 | 10564888 | <a href="#">NM_133952</a>          | <a href="#">101869</a> | unc-45 homolog A (C. elegans)  | <a href="#">Unc45a</a>             | 0.963 | -0.702 | 0.504405  | 0.74665  |
| 11784 | 10597686 | <a href="#">NM_009134</a>          | <a href="#">20264</a>  | sodium channel, voltage-gated, | <a href="#">Scn10a</a>             | 0.963 | -0.699 | 0.506617  | 0.748509 |
| 11785 | 10486898 | <a href="#">BC019404</a>           | <a href="#">214585</a> | spastic paraplegia 11          | <a href="#">Spg11</a>              | 0.963 | -0.579 | 0.580339  | 0.799512 |
| 11786 | 10443470 | <a href="#">NM_001002786</a>       | <a href="#">442827</a> | RIKEN cDNA 9830134C10 gene     | <a href="#">9830134C10Rik</a>      | 0.963 | -0.147 | 0.887222  | 0.955613 |
| 11787 | 10495623 | <a href="#">ENSMUST00000066215</a> | <a href="#">791377</a> | predicted gene, ENSMUSG0000005 | <a href="#">ENSMUSG00000053651</a> | 0.963 | -0.202 | 0.84535   | 0.937238 |
| 11788 | 10351857 | <a href="#">NM_008763</a>          | <a href="#">18313</a>  | olfactory receptor 16          | <a href="#">Olf16</a>              | 0.963 | 0.068  | 0.947622  | 0.979302 |
| 11789 | 10596521 | <a href="#">BC115866</a>           | <a href="#">108068</a> | glutamate receptor, metabotrop | <a href="#">Grm2</a>               | 0.963 | -0.698 | 0.506936  | 0.74877  |
| 11790 | 10529544 | <a href="#">AK043305</a>           | <a href="#">76710</a>  | RIKEN cDNA 2210406O10 gene     | <a href="#">2210406O10Rik</a>      | 0.963 | -0.462 | 0.657682  | 0.846971 |
| 11791 | 10547381 | <a href="#">NM_172492</a>          | <a href="#">211187</a> | leucine-rich repeats and trans | <a href="#">Lrtm2</a>              | 0.963 | -0.299 | 0.773553  | 0.9067   |
| 11792 | 10596925 | <a href="#">NM_023247</a>          | <a href="#">66706</a>  | RIKEN cDNA 4733401H18 gene     | <a href="#">4733401H18Rik</a>      | 0.963 | -0.684 | 0.515606  | 0.755142 |
| 11793 | 10419323 | <a href="#">NM_144553</a>          | <a href="#">218977</a> | discs, large homolog 7 (Drosop | <a href="#">Dlg7</a>               | 0.963 | -1.096 | 0.308426  | 0.585137 |
| 11794 | 10372104 | <a href="#">XR_062021</a>          | <a href="#">667407</a> | predicted gene, EG667407       | <a href="#">EG667407</a>           | 0.963 | -0.98  | 0.3587    | 0.630757 |
| 11795 | 10532807 | <a href="#">NM_148935</a>          | <a href="#">116810</a> | forkhead box N4                | <a href="#">Foxn4</a>              | 0.963 | -0.076 | 0.94134   | 0.9773   |
| 11796 | 10567516 | <a href="#">XM_355934</a>          | <a href="#">381917</a> | dynein, axonemal, heavy chain  | <a href="#">Dnahc3</a>             | 0.963 | -0.428 | 0.680849  | 0.858584 |

|       |          |                                    |                        |                                 |                                   |       |        |          |          |
|-------|----------|------------------------------------|------------------------|---------------------------------|-----------------------------------|-------|--------|----------|----------|
| 11797 | 10399357 | <a href="#">NM_013527</a>          | <a href="#">238057</a> | growth differentiation factor   | <a href="#">Gdf7</a>              | 0.963 | -0.132 | 0.898454 | 0.960023 |
| 11798 | 10429176 | <a href="#">AK143207</a>           | <a href="#">20442</a>  | ST3 beta-galactoside alpha-2,3  | <a href="#">St3gal1</a>           | 0.963 | -0.236 | 0.820087 | 0.928345 |
| 11799 | 10470392 | <a href="#">NM_029981</a>          | <a href="#">77794</a>  | ADAMTS-like 2                   | <a href="#">Adamtsl2</a>          | 0.963 | -0.679 | 0.518471 | 0.757012 |
| 11800 | 10545308 | <a href="#">NM_173001</a>          | <a href="#">104263</a> | jumonji domain containing 1A    | <a href="#">Jmjd1a</a>            | 0.963 | -1     | 0.349676 | 0.623229 |
| 11801 | 10449266 | <a href="#">NM_207217</a>          | <a href="#">106581</a> | integrin alpha FG-GAP repeat c  | <a href="#">Itfg3</a>             | 0.963 | -0.733 | 0.486523 | 0.734369 |
| 11802 | 10606389 | <a href="#">ENSMUST00000116167</a> | <a href="#">236954</a> | gene model 379, (NCBI)          | <a href="#">Gm379</a>             | 0.963 | -0.31  | 0.7656   | 0.902563 |
| 11803 | 10434556 | <a href="#">XR_034101</a>          | <a href="#">676915</a> | similar to nuclear domain 10 p  | <a href="#">LOC676915</a>         | 0.963 | 0.012  | 0.990823 | 0.996163 |
| 11804 | 10463066 | <a href="#">ENSMUST00000112231</a> | <a href="#">12495</a>  | ectonucleoside triphosphate di  | <a href="#">Entpd1</a>            | 0.963 | -0.421 | 0.686218 | 0.8615   |
| 11805 | 10464365 | <a href="#">NM_207261</a>          | <a href="#">332396</a> | potassium channel, subfamily K  | <a href="#">Kenk18</a>            | 0.963 | -0.236 | 0.819811 | 0.928345 |
| 11806 | 10474199 |                                    |                        |                                 |                                   | 0.963 | -1.021 | 0.340288 | 0.61558  |
| 11807 | 10568536 | <a href="#">NM_018867</a>          | <a href="#">55987</a>  | carboxypeptidase X 2 (M14 fami  | <a href="#">Cpxm2</a>             | 0.963 | -0.602 | 0.565464 | 0.791538 |
| 11808 | 10600357 | <a href="#">NM_181516</a>          | <a href="#">66826</a>  | tafazzin                        | <a href="#">Taz</a>               | 0.963 | -0.582 | 0.578065 | 0.798189 |
| 11809 | 10563377 | <a href="#">NM_017465</a>          | <a href="#">54200</a>  | sulfotransferase family, cytos  | <a href="#">Sult2b1</a>           | 0.963 | -0.326 | 0.753736 | 0.896244 |
| 11810 | 10398424 |                                    |                        |                                 |                                   | 0.963 | -0.49  | 0.638666 | 0.835923 |
| 11811 | 10443854 | <a href="#">NM_177307</a>          | <a href="#">320997</a> | cytochrome P450, family 4, sub  | <a href="#">Cyp4f39</a>           | 0.963 | -0.777 | 0.461918 | 0.716461 |
| 11812 | 10581702 | <a href="#">NM_172283</a>          | <a href="#">234730</a> | fucokinase                      | <a href="#">Fuk</a>               | 0.963 | -0.667 | 0.52537  | 0.761529 |
| 11813 | 10482467 | <a href="#">NM_011958</a>          | <a href="#">26428</a>  | origin recognition complex, su  | <a href="#">Orc4l</a>             | 0.963 | -0.92  | 0.387366 | 0.656334 |
| 11814 | 10386741 | <a href="#">ENSMUST00000074908</a> | <a href="#">73216</a>  | RIKEN cDNA 3110043A19 gene      | <a href="#">3110043A19Rik</a>     | 0.963 | -0.371 | 0.721168 | 0.878601 |
| 11815 | 10555620 | <a href="#">NM_011644</a>          | <a href="#">22064</a>  | transient receptor potential c  | <a href="#">Trpc2</a>             | 0.963 | -0.716 | 0.496354 | 0.740946 |
| 11816 | 10591853 | <a href="#">NM_194263</a>          | <a href="#">57246</a>  | T-box 20                        | <a href="#">Tbx20</a>             | 0.963 | -0.124 | 0.904439 | 0.962829 |
| 11817 | 10499366 | <a href="#">NM_025928</a>          | <a href="#">67037</a>  | polyamine-modulated factor 1    | <a href="#">Pmf1</a>              | 0.963 | -1.527 | 0.169239 | 0.42056  |
| 11818 | 10593233 | <a href="#">NM_013561</a>          | <a href="#">15561</a>  | 5-hydroxytryptamine (serotonin  | <a href="#">Htr3a</a>             | 0.963 | -0.343 | 0.741553 | 0.889732 |
| 11819 | 10594053 | <a href="#">NM_178087</a>          | <a href="#">18854</a>  | promyelocytic leukemia          | <a href="#">Pml</a>               | 0.963 | -0.615 | 0.557592 | 0.785718 |
| 11820 | 10545436 | <a href="#">NM_144917</a>          | <a href="#">232089</a> | RNA binding motif and ELMO dom  | <a href="#">Rbed1</a>             | 0.963 | -1.184 | 0.273796 | 0.548502 |
| 11821 | 10545891 | <a href="#">NM_023160</a>          | <a href="#">66116</a>  | camello-like 1                  | <a href="#">Cml1</a>              | 0.963 | -0.435 | 0.676311 | 0.855923 |
| 11822 | 10366866 | <a href="#">NM_027151</a>          | <a href="#">69654</a>  | dynactin 2                      | <a href="#">Dctn2</a>             | 0.963 | -0.873 | 0.410934 | 0.675081 |
| 11823 | 10395816 | <a href="#">NM_011968</a>          | <a href="#">26443</a>  | proteasome (prosome, macropain  | <a href="#">PsmA6</a>             | 0.963 | -1.119 | 0.298998 | 0.575095 |
| 11824 | 10551355 | <a href="#">NM_133210</a>          | <a href="#">170742</a> | SERTA domain containing 3       | <a href="#">Sertad3</a>           | 0.963 | -1.05  | 0.327675 | 0.60399  |
| 11825 | 10439463 | <a href="#">BC002243</a>           | <a href="#">76916</a>  | RIKEN cDNA 4930455C21 gene      | <a href="#">4930455C21Rik</a>     | 0.963 | -0.863 | 0.415694 | 0.678825 |
| 11826 | 10473541 | <a href="#">ENSMUST00000062494</a> | <a href="#">259030</a> | olfactory receptor 1125         | <a href="#">Olfr1125</a>          | 0.963 | -0.185 | 0.858313 | 0.943105 |
| 11827 | 10465990 | <a href="#">BC052053</a>           | <a href="#">68642</a>  | RIKEN cDNA 2810441K11 gene      | <a href="#">2810441K11Rik</a>     | 0.963 | -0.413 | 0.691787 | 0.864682 |
| 11828 | 10534168 | <a href="#">NM_177047</a>          | <a href="#">319974</a> | autism susceptibility candidat  | <a href="#">Aut2</a>              | 0.963 | -0.802 | 0.447926 | 0.705628 |
| 11829 | 10480646 | <a href="#">NM_0010333410</a>      | <a href="#">529360</a> | gene model 757, (NCBI)          | <a href="#">Gm757</a>             | 0.963 | -0.263 | 0.800102 | 0.919271 |
| 11830 | 10534728 | <a href="#">NM_031406</a>          | <a href="#">83704</a>  | solute carrier family 12 (pota  | <a href="#">Slc12a9</a>           | 0.963 | -0.261 | 0.801509 | 0.919489 |
| 11831 | 10472688 | <a href="#">NM_022435</a>          | <a href="#">64406</a>  | trans-acting transcription fac  | <a href="#">Sp5</a>               | 0.963 | -0.77  | 0.465653 | 0.7193   |
| 11832 | 10597898 |                                    |                        |                                 |                                   | 0.963 | -0.165 | 0.873305 | 0.949372 |
| 11833 | 10442870 | <a href="#">ENSMUST00000095500</a> | <a href="#">381077</a> | coiled-coil domain containing   | <a href="#">Ccdc78</a>            | 0.963 | -0.523 | 0.616594 | 0.822955 |
| 11834 | 10553107 | <a href="#">NM_001033170</a>       | <a href="#">73813</a>  | RIKEN cDNA 4930403C10 gene      | <a href="#">4930403C10Rik</a>     | 0.963 | -0.615 | 0.557628 | 0.785718 |
| 11835 | 10549473 | <a href="#">NM_181541</a>          | <a href="#">232560</a> | caprin family member 2          | <a href="#">Caprin2</a>           | 0.963 | -0.452 | 0.664257 | 0.850267 |
| 11836 | 10390454 | <a href="#">BC055770</a>           | <a href="#">103551</a> | RIKEN cDNA E130012A19 gene      | <a href="#">E130012A19Rik</a>     | 0.963 | -0.211 | 0.838956 | 0.934806 |
| 11837 | 10515841 | <a href="#">ENSMUST00000084312</a> | <a href="#">433751</a> | predicted gene, OTTMUSG00000000 | <a href="#">OTTMUSG0000008833</a> | 0.963 | -0.138 | 0.893868 | 0.958124 |
| 11838 | 10519951 | <a href="#">NM_175437</a>          | <a href="#">212167</a> | RIKEN cDNA A530088I07 gene      | <a href="#">A530088I07Rik</a>     | 0.963 | -0.216 | 0.83502  | 0.933323 |
| 11839 | 10496756 | <a href="#">NM_134160</a>          | <a href="#">171166</a> | mucoilin 3                      | <a href="#">Mcoln3</a>            | 0.963 | -1.058 | 0.324082 | 0.600613 |
| 11840 | 10463308 | <a href="#">NM_013806</a>          | <a href="#">12780</a>  | ATP-binding cassette, sub-fami  | <a href="#">Abcc2</a>             | 0.963 | -0.161 | 0.876516 | 0.951096 |
| 11841 | 10529026 |                                    |                        |                                 |                                   | 0.963 | -0.156 | 0.87997  | 0.952396 |
| 11842 | 10354832 | <a href="#">NM_027351</a>          | <a href="#">70225</a>  | peptidylprolyl isomerase (cycl  | <a href="#">Ppil3</a>             | 0.963 | -1.401 | 0.202789 | 0.465349 |
| 11843 | 10410929 | <a href="#">NM_023538</a>          | <a href="#">69923</a>  | acylglycerol kinase             | <a href="#">Agk</a>               | 0.963 | -0.982 | 0.357774 | 0.630135 |
| 11844 | 10596570 | <a href="#">BC052180</a>           | <a href="#">109095</a> | RNA binding motif protein 15B   | <a href="#">Rbm15b</a>            | 0.963 | -0.358 | 0.730456 | 0.883456 |
| 11845 | 10550557 | <a href="#">NM_031255</a>          | <a href="#">83434</a>  | radial spokehead-like 1         | <a href="#">Rshl1</a>             | 0.963 | -0.367 | 0.724339 | 0.880611 |
| 11846 | 10435443 | <a href="#">NM_175111</a>          | <a href="#">66667</a>  | Hspb associated protein 1       | <a href="#">Hspbap1</a>           | 0.963 | -0.53  | 0.612161 | 0.820198 |
| 11847 | 10445232 | <a href="#">ENSMUST00000074428</a> | <a href="#">73235</a>  | RIKEN cDNA 3110082D06           | <a href="#">3110082D06Rik</a>     | 0.963 | -0.528 | 0.613145 | 0.820788 |

|       |          |                                    |                           | gene                                                        |                                    |       |        |          |          |
|-------|----------|------------------------------------|---------------------------|-------------------------------------------------------------|------------------------------------|-------|--------|----------|----------|
| 11848 | 10400642 | <a href="#">BC062898</a>           | <a href="#">109065</a>    | RIKEN cDNA 1110034A24 gene                                  | <a href="#">1110034A24Rik</a>      | 0.963 | -0.52  | 0.618593 | 0.824167 |
| 11849 | 10603478 | <a href="#">NM_172478</a>          | <a href="#">209815</a>    | TBC1 domain family, member 25                               | <a href="#">Tbc1d25</a>            | 0.963 | -0.287 | 0.781926 | 0.911385 |
| 11850 | 10372844 | <a href="#">NM_138956</a>          | <a href="#">192678</a>    | Ras association (RalGDS/AF-6)                               | <a href="#">Rassf3</a>             | 0.963 | -0.693 | 0.510168 | 0.751325 |
| 11851 | 10379594 | <a href="#">NM_178680</a>          | <a href="#">217012</a>    | unc-45 homolog B (C. elegans)                               | <a href="#">Unc45b</a>             | 0.963 | -0.039 | 0.970077 | 0.987783 |
| 11852 | 10359648 | <a href="#">BC052855</a>           | <a href="#">381306</a>    | cDNA sequence BC055324                                      | <a href="#">BC055324</a>           | 0.963 | -0.899 | 0.397694 | 0.664302 |
| 11853 | 10434052 | <a href="#">NM_011028</a>          | <a href="#">18440</a>     | purinergic receptor P2X, ligand-gated ion channel subunit 2 | <a href="#">P2rx6</a>              | 0.962 | -0.919 | 0.387952 | 0.656721 |
| 11854 | 10504891 | <a href="#">NM_021436</a>          | <a href="#">230157</a>    | transmembrane protein with EGF repeats                      | <a href="#">Tmeff1</a>             | 0.962 | -0.491 | 0.638346 | 0.835923 |
| 11855 | 10440574 | <a href="#">NM_001081068</a>       | <a href="#">78913</a>     | zinc finger protein 294                                     | <a href="#">Zfp294</a>             | 0.962 | -0.979 | 0.359292 | 0.631337 |
| 11856 | 10519046 | <a href="#">AK141913</a>           | <a href="#">320939</a>    | RIKEN cDNA 5930403L14 gene                                  | <a href="#">5930403L14Rik</a>      | 0.962 | -0.591 | 0.572612 | 0.796254 |
| 11857 | 10604837 | <a href="#">NM_009237</a>          | <a href="#">20675</a>     | SRY-box containing gene 3                                   | <a href="#">Sox3</a>               | 0.962 | -1.126 | 0.296218 | 0.572717 |
| 11858 | 10591022 | <a href="#">BC016078</a>           | <a href="#">70984</a>     | RIKEN cDNA 4931406C07 gene                                  | <a href="#">4931406C07Rik</a>      | 0.962 | -0.947 | 0.374224 | 0.644376 |
| 11859 | 10403903 | <a href="#">NM_009054</a>          | <a href="#">19720</a>     | tripartite motif-containing 27                              | <a href="#">Trim27</a>             | 0.962 | -0.97  | 0.363421 | 0.634688 |
| 11860 | 10540622 | <a href="#">NM_030178</a>          | <a href="#">78783</a>     | bromodomain and PHD finger containing protein 1             | <a href="#">Brpf1</a>              | 0.962 | -0.703 | 0.504094 | 0.746397 |
| 11861 | 10463513 | <a href="#">ENSMUST00000096033</a> | <a href="#">75056</a>     | RIKEN cDNA 4930505N22 gene                                  | <a href="#">4930505N22Rik</a>      | 0.962 | -0.612 | 0.559272 | 0.786672 |
| 11862 | 10400706 | <a href="#">ENSMUST00000053451</a> | <a href="#">100036526</a> | predicted gene, ENSMUSG0000005                              | <a href="#">ENSMUSG00000052673</a> | 0.962 | -0.425 | 0.682933 | 0.859827 |
| 11863 | 10576506 | <a href="#">NM_010322</a>          | <a href="#">14712</a>     | glyceronephosphate O-acyltransferase 1                      | <a href="#">Gnpat</a>              | 0.962 | -0.968 | 0.36451  | 0.635653 |
| 11864 | 10415570 | <a href="#">ENSMUST00000072032</a> | <a href="#">100125977</a> | predicted gene, ENSMUSG0000005                              | <a href="#">ENSMUSG00000058045</a> | 0.962 | -0.75  | 0.476809 | 0.727649 |
| 11865 | 10389207 | <a href="#">NM_013653</a>          | <a href="#">20304</a>     | chemokine (C-C motif) ligand 5                              | <a href="#">Ccl5</a>               | 0.962 | -0.275 | 0.790726 | 0.914692 |
| 11866 | 10521596 |                                    |                           |                                                             |                                    | 0.962 | -0.756 | 0.473341 | 0.725045 |
| 11867 | 10578916 | <a href="#">NM_025436</a>          | <a href="#">66234</a>     | sterol-C4-methyl oxidase-like protein 1                     | <a href="#">Sc4mol</a>             | 0.962 | -1.186 | 0.273159 | 0.547717 |
| 11868 | 10568174 | <a href="#">NM_009259</a>          | <a href="#">20737</a>     | sialophorin                                                 | <a href="#">Spn</a>                | 0.962 | -0.148 | 0.886484 | 0.955393 |
| 11869 | 10432723 | <a href="#">NM_053249</a>          | <a href="#">114566</a>    | keratin 82                                                  | <a href="#">Krt82</a>              | 0.962 | -0.606 | 0.563126 | 0.789853 |
| 11870 | 10352969 | <a href="#">ENSMUST00000044180</a> | <a href="#">226304</a>    | neuropeptides B/W receptor 1                                | <a href="#">Npbwr1</a>             | 0.962 | -0.379 | 0.715568 | 0.875402 |
| 11871 | 10566615 | <a href="#">NM_146601</a>          | <a href="#">258594</a>    | olfactory receptor 710                                      | <a href="#">Olfr710</a>            | 0.962 | -0.774 | 0.463438 | 0.717662 |
| 11872 | 10481420 | <a href="#">BC078441</a>           | <a href="#">227695</a>    | DNA segment, Chr 2, Wayne Stat                              | <a href="#">D2Wsu81e</a>           | 0.962 | -0.942 | 0.376741 | 0.646995 |
| 11873 | 10581327 | <a href="#">BC052498</a>           | <a href="#">102124</a>    | RIKEN cDNA E130303B06 gene                                  | <a href="#">E130303B06Rik</a>      | 0.962 | -1.415 | 0.19876  | 0.459902 |
| 11874 | 10437684 | <a href="#">NM_013637</a>          | <a href="#">19118</a>     | protamine 1                                                 | <a href="#">Prm1</a>               | 0.962 | -0.141 | 0.89153  | 0.957571 |
| 11875 | 10419596 | <a href="#">NM_027248</a>          | <a href="#">69890</a>     | zinc finger protein 219                                     | <a href="#">Zfp219</a>             | 0.962 | -1.183 | 0.27426  | 0.548935 |
| 11876 | 10503204 | <a href="#">NM_001081417</a>       | <a href="#">320790</a>    | chromodomain helicase DNA binding protein 7                 | <a href="#">Chd7</a>               | 0.962 | -0.864 | 0.415218 | 0.678399 |
| 11877 | 10574656 | <a href="#">NM_015821</a>          | <a href="#">50788</a>     | F-box and leucine-rich repeat protein 18                    | <a href="#">Fbx18</a>              | 0.962 | -0.481 | 0.645084 | 0.839674 |
| 11878 | 10549854 | <a href="#">NM_175247</a>          | <a href="#">22690</a>     | zinc finger protein 28                                      | <a href="#">Zfp28</a>              | 0.962 | -0.92  | 0.387323 | 0.65632  |
| 11879 | 10345482 | <a href="#">NM_033570</a>          | <a href="#">94220</a>     | cyclin M4                                                   | <a href="#">Ccnm4</a>              | 0.962 | -1.184 | 0.27405  | 0.548672 |
| 11880 | 10477813 | <a href="#">AY061882</a>           | <a href="#">170791</a>    | RNA binding motif protein 39                                | <a href="#">Rbm39</a>              | 0.962 | -0.723 | 0.492433 | 0.73844  |
| 11881 | 10575380 | <a href="#">NM_172916</a>          | <a href="#">244653</a>    | hydrocephalus inducing factor 1                             | <a href="#">Hydin</a>              | 0.962 | -0.659 | 0.530408 | 0.765382 |
| 11882 | 10590267 | <a href="#">NR_002902</a>          | <a href="#">104433</a>    | small nucleolar RNA, H/ACA box 62                           | <a href="#">Snora62</a>            | 0.962 | -0.989 | 0.354706 | 0.627293 |
| 11883 | 10438405 | <a href="#">M94350</a>             | <a href="#">16142</a>     | immunoglobulin lambda chain, variable 1                     | <a href="#">Igl-V1</a>             | 0.962 | -0.105 | 0.91893  | 0.967815 |
| 11884 | 10395659 | <a href="#">NM_007728</a>          | <a href="#">12810</a>     | coagulation factor C homolog (mouse)                        | <a href="#">Coch</a>               | 0.962 | -1.285 | 0.238434 | 0.511045 |
| 11885 | 10561706 | <a href="#">NM_028179</a>          | <a href="#">72275</a>     | RIKEN cDNA 2200002D01 gene                                  | <a href="#">2200002D01Rik</a>      | 0.962 | -0.853 | 0.420833 | 0.683211 |
| 11886 | 10549751 | <a href="#">NM_001033383</a>       | <a href="#">319748</a>    | RIKEN cDNA 6430526N21 gene                                  | <a href="#">6430526N21Rik</a>      | 0.962 | -1.344 | 0.219838 | 0.488612 |
| 11887 | 10583847 | <a href="#">NM_181316</a>          | <a href="#">319845</a>    | Bardet-Biedl syndrome 9                                     | <a href="#">Bbs9</a>               | 0.962 | -0.953 | 0.371558 | 0.64202  |
| 11888 | 10405999 | <a href="#">ENSMUST00000022091</a> | <a href="#">77166</a>     | RIKEN cDNA 8030423J24 gene                                  | <a href="#">8030423J24Rik</a>      | 0.962 | -0.554 | 0.596358 | 0.809852 |
| 11889 | 10486327 | <a href="#">ENSMUST00000110756</a> | <a href="#">640524</a>    | spectrin beta 5                                             | <a href="#">Spcb5</a>              | 0.962 | -0.901 | 0.396665 | 0.664034 |
| 11890 | 10535247 | <a href="#">NM_028833</a>          | <a href="#">74239</a>     | IQ motif containing E protein 1                             | <a href="#">Iqce</a>               | 0.962 | -0.478 | 0.64665  | 0.840625 |
| 11891 | 10430866 | <a href="#">NM_010005</a>          | <a href="#">13101</a>     | cytochrome P450, family 2, subfamily 1, polypeptide 10      | <a href="#">Cyp2d10</a>            | 0.962 | -0.732 | 0.487141 | 0.734936 |
| 11892 | 10517371 |                                    |                           |                                                             |                                    | 0.962 | -0.476 | 0.64844  | 0.841814 |
| 11893 | 10593384 | <a href="#">NM_178118</a>          | <a href="#">330938</a>    | DIX domain containing 1                                     | <a href="#">Dixdc1</a>             | 0.962 | -1.648 | 0.142101 | 0.38202  |

|       |          |                                    |                           |                                |                               |       |        |          |          |
|-------|----------|------------------------------------|---------------------------|--------------------------------|-------------------------------|-------|--------|----------|----------|
| 11894 | 10601882 | <a href="#">BC065397</a>           | <a href="#">436230</a>    | cDNA sequence BC065397         | <a href="#">BC065397</a>      | 0.962 | -1.25  | 0.250493 | 0.524406 |
| 11895 | 10457038 |                                    |                           |                                |                               | 0.962 | -0.724 | 0.492008 | 0.738272 |
| 11896 | 10406280 | <a href="#">NM_029343</a>          | <a href="#">75571</a>     | spermatogenesis associated 9   | <a href="#">Spata9</a>        | 0.962 | -0.333 | 0.748344 | 0.893398 |
| 11897 | 10440562 | <a href="#">NM_001081068</a>       | <a href="#">78913</a>     | zinc finger protein 294        | <a href="#">Zfp294</a>        | 0.962 | -0.269 | 0.795407 | 0.916955 |
| 11898 | 10596043 | <a href="#">NM_010878</a>          | <a href="#">17973</a>     | non-catalytic region of tyrosi | <a href="#">Nck1</a>          | 0.962 | -1.063 | 0.322204 | 0.598969 |
| 11899 | 10421685 | <a href="#">BC100483</a>           | <a href="#">72661</a>     | stress-associated endoplasmic  | <a href="#">Serp2</a>         | 0.962 | -0.512 | 0.624088 | 0.828379 |
| 11900 | 10463185 | <a href="#">NM_145500</a>          | <a href="#">226122</a>    | ubiquitin domain containing 1  | <a href="#">Ubt1</a>          | 0.962 | -0.727 | 0.489905 | 0.737211 |
| 11901 | 10472402 | <a href="#">NM_001099298</a>       | <a href="#">110876</a>    | sodium channel, voltage-gated, | <a href="#">Scn2a1</a>        | 0.962 | -0.339 | 0.744377 | 0.891431 |
| 11902 | 10591777 | <a href="#">BC011413</a>           | <a href="#">625603</a>    | predicted gene, EG625603       | <a href="#">EG625603</a>      | 0.962 | -0.782 | 0.458918 | 0.713797 |
| 11903 | 10375322 | <a href="#">ENSMUST00000056256</a> | <a href="#">75727</a>     | RIKEN cDNA 4933415A04 gene     | <a href="#">4933415A04Rik</a> | 0.962 | -0.655 | 0.532845 | 0.766896 |
| 11904 | 10588582 | <a href="#">BC116708</a>           | <a href="#">235599</a>    | RIKEN cDNA 6430571L13 gene     | <a href="#">6430571L13Rik</a> | 0.962 | -0.413 | 0.691678 | 0.864682 |
| 11905 | 10569356 |                                    |                           |                                |                               | 0.962 | 0.101  | 0.921995 | 0.968972 |
| 11906 | 10475804 | <a href="#">AB257502</a>           | <a href="#">215456</a>    | RIKEN cDNA A530057A03 gene     | <a href="#">A530057A03Rik</a> | 0.962 | -0.558 | 0.593941 | 0.808302 |
| 11907 | 10557855 | <a href="#">NM_001079932</a>       | <a href="#">434246</a>    | tripartite motif-containing 72 | <a href="#">Trim72</a>        | 0.962 | -0.626 | 0.550445 | 0.780695 |
| 11908 | 10424965 | <a href="#">NM_033371</a>          | <a href="#">73062</a>     | protein phosphatase 1, regulat | <a href="#">Ppp1r16a</a>      | 0.962 | -0.345 | 0.740191 | 0.889339 |
| 11909 | 10431113 | <a href="#">NM_013873</a>          | <a href="#">29859</a>     | sulfotransferase family 4A, me | <a href="#">Sult4a1</a>       | 0.962 | -0.542 | 0.604048 | 0.815116 |
| 11910 | 10593169 | <a href="#">NM_023114</a>          | <a href="#">11814</a>     | apolipoprotein C-III           | <a href="#">Apoc3</a>         | 0.962 | -0.566 | 0.588576 | 0.805172 |
| 11911 | 10451547 | <a href="#">XM_001480078</a>       | <a href="#">100043385</a> | similar to high mobility group | <a href="#">LOC100043385</a>  | 0.962 | -0.989 | 0.354462 | 0.627071 |
| 11912 | 10351517 | <a href="#">BC061017</a>           | <a href="#">75472</a>     | RIKEN cDNA 1700009P17 gene     | <a href="#">1700009P17Rik</a> | 0.962 | -0.099 | 0.923929 | 0.96976  |
| 11913 | 10511084 | <a href="#">NM_138671</a>          | <a href="#">192185</a>    | NAD kinase                     | <a href="#">Nadk</a>          | 0.962 | -0.987 | 0.355768 | 0.628276 |
| 11914 | 10408638 | <a href="#">ENSMUST00000021851</a> | <a href="#">71864</a>     | RIKEN cDNA 1700026J04 gene     | <a href="#">1700026J04Rik</a> | 0.962 | -0.817 | 0.440217 | 0.699184 |
| 11915 | 10460052 |                                    |                           |                                |                               | 0.962 | -0.583 | 0.577363 | 0.797771 |
| 11916 | 10557308 | <a href="#">ENSMUST00000106437</a> | <a href="#">628779</a>    | predicted gene, EG628779       | <a href="#">EG628779</a>      | 0.962 | -1.457 | 0.187244 | 0.445643 |
| 11917 | 10419575 | <a href="#">NM_177544</a>          | <a href="#">219033</a>    | angiogenin, ribonuclease A fam | <a href="#">Ang4</a>          | 0.962 | -0.271 | 0.793973 | 0.916212 |
| 11918 | 10470911 |                                    |                           |                                |                               | 0.962 | -1.164 | 0.281452 | 0.55689  |
| 11919 | 10605644 | <a href="#">XR_031824</a>          | <a href="#">633246</a>    | similar to splicing factor, ar | <a href="#">LOC633246</a>     | 0.962 | -0.742 | 0.481309 | 0.730704 |
| 11920 | 10374500 | <a href="#">NM_139061</a>          | <a href="#">245944</a>    | vacuolar protein sorting 54 (y | <a href="#">Vps54</a>         | 0.962 | -1.156 | 0.284441 | 0.559618 |
| 11921 | 10417526 | <a href="#">NM_007870</a>          | <a href="#">13421</a>     | deoxyribonuclease 1-like 3     | <a href="#">Dnase1l3</a>      | 0.962 | -0.901 | 0.396712 | 0.664034 |
| 11922 | 10430660 | <a href="#">NM_011057</a>          | <a href="#">18591</a>     | platelet derived growth factor | <a href="#">Pdgfb</a>         | 0.962 | -0.359 | 0.729776 | 0.883251 |
| 11923 | 10439889 |                                    |                           |                                |                               | 0.962 | -0.111 | 0.914287 | 0.966149 |
| 11924 | 10493267 | <a href="#">NM_008487</a>          | <a href="#">16800</a>     | rho/rac guanine nucleotide exc | <a href="#">Arhgef2</a>       | 0.962 | -0.751 | 0.476525 | 0.72763  |
| 11925 | 10606488 | <a href="#">ENSMUST00000026601</a> | <a href="#">73809</a>     | spermidine/spermine N1-acetyl  | <a href="#">Sat1</a>          | 0.962 | -0.429 | 0.680647 | 0.85838  |
| 11926 | 10402444 | <a href="#">NM_148948</a>          | <a href="#">192119</a>    | Dicer1, Dcr-1 homolog (Drosoph | <a href="#">Dicer1</a>        | 0.962 | -1.011 | 0.344658 | 0.61884  |
| 11927 | 10378765 | <a href="#">NM_021294</a>          | <a href="#">13168</a>     | diazepam binding inhibitor-lik | <a href="#">Dbil5</a>         | 0.962 | -0.474 | 0.649348 | 0.842476 |
| 11928 | 10479726 | <a href="#">NM_153594</a>          | <a href="#">245867</a>    | protein-L-isoaspartate (D-aspa | <a href="#">Pcmt2</a>         | 0.962 | -1.403 | 0.202057 | 0.464803 |
| 11929 | 10488693 | <a href="#">NM_198617</a>          | <a href="#">241732</a>    | TSPY-like 3                    | <a href="#">Tspyl3</a>        | 0.962 | -0.56  | 0.592433 | 0.807166 |
| 11930 | 10533198 | <a href="#">NM_145227</a>          | <a href="#">246728</a>    | 2'-5' oligoadenylate synthetas | <a href="#">Oas2</a>          | 0.962 | -0.668 | 0.524675 | 0.761127 |
| 11931 | 10509941 | <a href="#">ENSMUST00000097813</a> | <a href="#">76166</a>     | RIKEN cDNA 6330545A04 gene     | <a href="#">6330545A04Rik</a> | 0.962 | -0.047 | 0.964134 | 0.985864 |
| 11932 | 10479615 | <a href="#">AK082896</a>           | <a href="#">329584</a>    | hypothetical protein C430010C0 | <a href="#">C430010C01</a>    | 0.962 | -0.754 | 0.474947 | 0.726596 |
| 11933 | 10398578 | <a href="#">NM_001081057</a>       | <a href="#">104859</a>    | RIKEN cDNA 4930573119 gene     | <a href="#">4930573119Rik</a> | 0.962 | -1.014 | 0.343194 | 0.617311 |
| 11934 | 10439887 |                                    |                           |                                |                               | 0.962 | -0.101 | 0.922417 | 0.969068 |
| 11935 | 10442629 | <a href="#">NM_027141</a>          | <a href="#">79043</a>     | splA/ryanodine receptor domain | <a href="#">Spsb3</a>         | 0.962 | -0.586 | 0.576018 | 0.797128 |
| 11936 | 10530310 | <a href="#">XM_001477289</a>       | <a href="#">666938</a>    | predicted gene, EG666938       | <a href="#">EG666938</a>      | 0.961 | -0.69  | 0.511514 | 0.752366 |
| 11937 | 10534316 | <a href="#">NM_033561</a>          | <a href="#">22384</a>     | eukaryotic translation initiat | <a href="#">Eif4h</a>         | 0.961 | -0.797 | 0.450883 | 0.708135 |
| 11938 | 10493382 | <a href="#">NM_013631</a>          | <a href="#">18770</a>     | pyruvate kinase liver and red  | <a href="#">Pklr</a>          | 0.961 | -1.08  | 0.315008 | 0.591942 |
| 11939 | 10510473 | <a href="#">NM_023465</a>          | <a href="#">67087</a>     | catenin beta interacting prote | <a href="#">Ctnnbip1</a>      | 0.961 | -1.406 | 0.20133  | 0.463716 |
| 11940 | 10474002 | <a href="#">NM_007699</a>          | <a href="#">12672</a>     | cholinergic receptor, muscarin | <a href="#">Chrm4</a>         | 0.961 | -0.132 | 0.898376 | 0.960023 |
| 11941 | 10404195 | <a href="#">BC115940</a>           | <a href="#">210108</a>    | RIKEN cDNA D130043K22 gene     | <a href="#">D130043K22Rik</a> | 0.961 | -0.685 | 0.514807 | 0.754817 |
| 11942 | 10607012 | <a href="#">NM_053185</a>          | <a href="#">94216</a>     | collagen, type IV, alpha 6     | <a href="#">Col4a6</a>        | 0.961 | -0.661 | 0.529209 | 0.76441  |
| 11943 | 10464917 | <a href="#">NM_009920</a>          | <a href="#">12794</a>     | cornichon homolog 2 (Drosophil | <a href="#">Cnih2</a>         | 0.961 | -1.073 | 0.317693 | 0.594819 |
| 11944 | 10428443 | <a href="#">NM_026200</a>          | <a href="#">67498</a>     | potassium channel, subfamily V | <a href="#">Kenv1</a>         | 0.961 | -0.443 | 0.670728 | 0.85389  |
| 11945 | 10416503 | <a href="#">AF357400</a>           | <a href="#">22070</a>     | tumor protein, translationally | <a href="#">Tpt1</a>          | 0.961 | -0.393 | 0.705879 | 0.871814 |
| 11946 | 10564877 | <a href="#">NM_173445</a>          | <a href="#">269955</a>    | RCC1 domain containing 1       | <a href="#">Rccd1</a>         | 0.961 | -0.707 | 0.501776 | 0.744686 |
| 11947 | 10557033 | <a href="#">ENSMUST00000098074</a> | <a href="#">13631</a>     | eukarvotic elongation factor-2 | <a href="#">Eef2k</a>         | 0.961 | -0.219 | 0.832564 | 0.932679 |

|       |          |                                    |                           |                                |                                    |       |        |          |          |
|-------|----------|------------------------------------|---------------------------|--------------------------------|------------------------------------|-------|--------|----------|----------|
| 11948 | 10501265 | <a href="#">NM_010306</a>          | <a href="#">14679</a>     | guanine nucleotide binding pro | <a href="#">Gnai3</a>              | 0.961 | -1.316 | 0.228488 | 0.499498 |
| 11949 | 10485115 | <a href="#">ENSMUST00000099709</a> | <a href="#">104418</a>    | diacylglycerol kinase zeta     | <a href="#">Dgkz</a>               | 0.961 | -0.514 | 0.622712 | 0.827309 |
| 11950 | 10576881 | <a href="#">ENSMUST00000058918</a> | <a href="#">665044</a>    | predicted gene, EG665044       | <a href="#">EG665044</a>           | 0.961 | -0.591 | 0.572552 | 0.796254 |
| 11951 | 10461257 | <a href="#">NM_146093</a>          | <a href="#">225896</a>    | DNA segment, Chr 19, ERATO Doi | <a href="#">D19ErtD721e</a>        | 0.961 | -1.288 | 0.237407 | 0.509669 |
| 11952 | 10549869 | <a href="#">NM_146915</a>          | <a href="#">258917</a>    | olfactory receptor 1336        | <a href="#">Olfr1336</a>           | 0.961 | -0.164 | 0.874213 | 0.949962 |
| 11953 | 10429607 | <a href="#">NM_028404</a>          | <a href="#">72960</a>     | DNA topoisomerase 1, mitochond | <a href="#">Top1mt</a>             | 0.961 | -0.771 | 0.465307 | 0.718975 |
| 11954 | 10431080 | <a href="#">NM_029946</a>          | <a href="#">77627</a>     | EF-hand calcium binding domain | <a href="#">Efcab3</a>             | 0.961 | -0.034 | 0.973687 | 0.988697 |
| 11955 | 10460317 | <a href="#">NM_008851</a>          | <a href="#">18739</a>     | phosphatidylinositol membrane- | <a href="#">Pitpnm1</a>            | 0.961 | -0.518 | 0.619636 | 0.824984 |
| 11956 | 10580756 | <a href="#">BC027060</a>           | <a href="#">102122</a>    | RIKEN cDNA 2310065K24 gene     | <a href="#">2310065K24Rik</a>      | 0.961 | -1.096 | 0.308362 | 0.585068 |
| 11957 | 10464034 | <a href="#">NM_009348</a>          | <a href="#">21684</a>     | tectorin beta                  | <a href="#">Tectb</a>              | 0.961 | -0.884 | 0.405152 | 0.669695 |
| 11958 | 10404380 | <a href="#">NM_001037955</a>       | <a href="#">105352</a>    | dual specificity phosphatase 2 | <a href="#">Dusp22</a>             | 0.961 | -0.729 | 0.489005 | 0.736349 |
| 11959 | 10535904 | <a href="#">NM_013559</a>          | <a href="#">15505</a>     | heat shock 105kDa/110kDa prote | <a href="#">Hsph1</a>              | 0.961 | -0.99  | 0.354259 | 0.626867 |
| 11960 | 10371201 | <a href="#">NM_134009</a>          | <a href="#">103425</a>    | nicalin homolog (zebrafish)    | <a href="#">Ncln</a>               | 0.961 | -0.738 | 0.483551 | 0.732287 |
| 11961 | 10603870 | <a href="#">NM_007922</a>          | <a href="#">13712</a>     | ELK1, member of ETS oncogene f | <a href="#">Elk1</a>               | 0.961 | -1.047 | 0.329027 | 0.605314 |
| 11962 | 10513397 | <a href="#">NM_001013577</a>       | <a href="#">66209</a>     | RIKEN cDNA 1110054O05 gene     | <a href="#">1110054O05Rik</a>      | 0.961 | -1.029 | 0.3367   | 0.612455 |
| 11963 | 10511252 | <a href="#">NM_021402</a>          | <a href="#">140499</a>    | ubiquitin-conjugating enzyme E | <a href="#">Ube2j2</a>             | 0.961 | -0.638 | 0.543397 | 0.775747 |
| 11964 | 10567608 | <a href="#">NM_001033318</a>       | <a href="#">233824</a>    | component of oligomeric golgi  | <a href="#">Cog7</a>               | 0.961 | -0.51  | 0.625413 | 0.829231 |
| 11965 | 10420637 | <a href="#">NM_008466</a>          | <a href="#">16648</a>     | karyopherin (importin) alpha 3 | <a href="#">Kpna3</a>              | 0.961 | -1.732 | 0.12567  | 0.354951 |
| 11966 | 10585146 | <a href="#">NM_030709</a>          | <a href="#">80893</a>     | transmembrane protease, serine | <a href="#">Tmprss5</a>            | 0.961 | -0.462 | 0.657954 | 0.847091 |
| 11967 | 10493210 | <a href="#">NM_178246</a>          | <a href="#">229512</a>    | Smg-5 homolog, nonsense mediat | <a href="#">Smg5</a>               | 0.961 | -0.961 | 0.367648 | 0.638641 |
| 11968 | 10559241 | <a href="#">NR_002855</a>          | <a href="#">111975</a>    | insulin-like growth factor 2,  | <a href="#">Igf2as</a>             | 0.961 | -0.536 | 0.607967 | 0.817473 |
| 11969 | 10474689 | <a href="#">NM_026620</a>          | <a href="#">68215</a>     | RIKEN cDNA 2610510H03 gene     | <a href="#">2610510H03Rik</a>      | 0.961 | -1.302 | 0.233059 | 0.504071 |
| 11970 | 10419810 | <a href="#">NM_011186</a>          | <a href="#">19173</a>     | proteasome (prosome, macropain | <a href="#">Psmb5</a>              | 0.961 | -1.84  | 0.107136 | 0.322599 |
| 11971 | 10563718 | <a href="#">XM_001474409</a>       | <a href="#">677457</a>    | similar to MAS-related GPR, me | <a href="#">LOC677457</a>          | 0.961 | -0.347 | 0.738676 | 0.88853  |
| 11972 | 10462130 | <a href="#">AK033223</a>           | <a href="#">68034</a>     | RIKEN cDNA 2900009I07 gene     | <a href="#">2900009I07Rik</a>      | 0.961 | -0.668 | 0.524831 | 0.761165 |
| 11973 | 10607747 | <a href="#">NM_009173</a>          | <a href="#">20438</a>     | seven in absentia 1B           | <a href="#">Siah1b</a>             | 0.961 | -0.343 | 0.741198 | 0.889595 |
| 11974 | 10495042 | <a href="#">NM_027982</a>          | <a href="#">71887</a>     | protein phosphatase 1J         | <a href="#">Ppm1j</a>              | 0.961 | -0.138 | 0.893937 | 0.958149 |
| 11975 | 10538307 | <a href="#">ENSMUST00000068976</a> | <a href="#">791364</a>    | predicted gene, OTTMUSG0000001 | <a href="#">OTTMUSG00000018874</a> | 0.961 | -0.379 | 0.715439 | 0.875402 |
| 11976 | 10591035 | <a href="#">NM_176976</a>          | <a href="#">319675</a>    | RIKEN cDNA 5830418K08 gene     | <a href="#">5830418K08Rik</a>      | 0.961 | -0.825 | 0.435655 | 0.695606 |
| 11977 | 10537627 | <a href="#">NM_009430</a>          | <a href="#">22072</a>     | protease, serine, 2            | <a href="#">Prss2</a>              | 0.961 | -0.497 | 0.634088 | 0.833675 |
| 11978 | 10459296 | <a href="#">NM_134136</a>          | <a href="#">107035</a>    | F-box protein 38               | <a href="#">Fbxo38</a>             | 0.961 | -1.378 | 0.209451 | 0.474615 |
| 11979 | 10383791 | <a href="#">NM_153142</a>          | <a href="#">103710</a>    | solute carrier family 35, memb | <a href="#">Slc35e4</a>            | 0.961 | -0.407 | 0.695785 | 0.866361 |
| 11980 | 10521964 | <a href="#">ENSMUST00000101200</a> | <a href="#">330086</a>    | predicted gene, ENSMUSG0000007 | <a href="#">ENSMUSG00000072936</a> | 0.961 | -0.586 | 0.575955 | 0.797128 |
| 11981 | 10423080 | <a href="#">NM_030888</a>          | <a href="#">81799</a>     | C1q and tumor necrosis factor  | <a href="#">C1qtnf3</a>            | 0.961 | -0.947 | 0.374105 | 0.64426  |
| 11982 | 10573996 |                                    |                           |                                |                                    | 0.961 | -1.001 | 0.349422 | 0.622897 |
| 11983 | 10478114 | <a href="#">ENSMUST00000099133</a> | <a href="#">545481</a>    | chromosome 20 open reading fra | <a href="#">RP23-392P11.3</a>      | 0.961 | -0.035 | 0.972907 | 0.98829  |
| 11984 | 10398288 | <a href="#">NM_009537</a>          | <a href="#">22632</a>     | YY1 transcription factor       | <a href="#">Yy1</a>                | 0.961 | -1.123 | 0.297397 | 0.573687 |
| 11985 | 10427928 | <a href="#">NM_001081302</a>       | <a href="#">223435</a>    | triple functional domain (PTPR | <a href="#">Trio</a>               | 0.961 | -0.992 | 0.353424 | 0.626177 |
| 11986 | 10516219 | <a href="#">ENSMUST00000097894</a> | <a href="#">100038647</a> | predicted gene, ENSMUSG0000007 | <a href="#">ENSMUSG00000073760</a> | 0.961 | -0.188 | 0.856305 | 0.941981 |
| 11987 | 10395827 | <a href="#">NM_020287</a>          | <a href="#">56856</a>     | insulinoma-associated 2        | <a href="#">Insm2</a>              | 0.961 | -0.939 | 0.378343 | 0.648167 |
| 11988 | 10584653 | <a href="#">NM_145613</a>          | <a href="#">235312</a>    | C1q and tumor necrosis factor  | <a href="#">C1qtnf5</a>            | 0.961 | -0.449 | 0.666473 | 0.851355 |
| 11989 | 10468037 | <a href="#">ENSMUST00000076452</a> | <a href="#">435601</a>    | predicted gene, EG435601       | <a href="#">EG435601</a>           | 0.961 | -0.575 | 0.582731 | 0.800924 |
| 11990 | 10428398 | <a href="#">NM_008388</a>          | <a href="#">16341</a>     | eukaryotic translation initiat | <a href="#">Eif3e</a>              | 0.961 | -0.78  | 0.460325 | 0.71495  |
| 11991 | 10529425 | <a href="#">NM_029278</a>          | <a href="#">75416</a>     | nucleolar protein 14           | <a href="#">Nol14</a>              | 0.961 | -1.19  | 0.271636 | 0.546245 |
| 11992 | 10353127 | <a href="#">NM_001081209</a>       | <a href="#">383491</a>    | PR domain containing 14        | <a href="#">Prdm14</a>             | 0.961 | -0.391 | 0.706912 | 0.872152 |
| 11993 | 10541642 | <a href="#">XM_917643</a>          | <a href="#">623374</a>    | similar to putative glialblast | <a href="#">LOC623374</a>          | 0.961 | -0.31  | 0.765201 | 0.902365 |
| 11994 | 10402703 | <a href="#">ENSMUST00000101035</a> | <a href="#">100038720</a> | predicted gene, ENSMUSG0000007 | <a href="#">ENSMUSG00000072830</a> | 0.961 | -0.489 | 0.639546 | 0.836482 |

|       |          |                                    |                           |                                |                                    |       |        |          |          |
|-------|----------|------------------------------------|---------------------------|--------------------------------|------------------------------------|-------|--------|----------|----------|
| 11995 | 10451565 | <a href="#">NM_022015</a>          | <a href="#">63856</a>     | TAF8 RNA polymerase II, TATA b | <a href="#">Taf8</a>               | 0.961 | -0.774 | 0.463808 | 0.717865 |
| 11996 | 10426016 | <a href="#">NM_013882</a>          | <a href="#">29870</a>     | G two S phase expressed protei | <a href="#">Gtse1</a>              | 0.961 | -0.652 | 0.534628 | 0.768432 |
| 11997 | 10460706 | <a href="#">NM_028769</a>          | <a href="#">74126</a>     | synovial apoptosis inhibitor 1 | <a href="#">Syvn1</a>              | 0.961 | -0.895 | 0.399662 | 0.665809 |
| 11998 | 10430245 |                                    |                           |                                |                                    | 0.961 | -0.351 | 0.735978 | 0.886898 |
| 11999 | 10408600 | <a href="#">NM_009254</a>          | <a href="#">20719</a>     | serine (or cysteine) peptidase | <a href="#">Serpinb6a</a>          | 0.961 | -1.123 | 0.297288 | 0.573687 |
| 12000 | 10517842 | <a href="#">NM_172122</a>          | <a href="#">230872</a>    | ciliary rootlet coiled-coil, r | <a href="#">Croce</a>              | 0.961 | -0.806 | 0.445892 | 0.703765 |
| 12001 | 10364766 | <a href="#">NM_009091</a>          | <a href="#">20054</a>     | ribosomal protein S15          | <a href="#">Rps15</a>              | 0.961 | -1.286 | 0.238025 | 0.51041  |
| 12002 | 10555917 | <a href="#">NM_146750</a>          | <a href="#">258745</a>    | olfactory receptor 689         | <a href="#">Olfr689</a>            | 0.961 | -0.221 | 0.830924 | 0.932182 |
| 12003 | 10490982 | <a href="#">BC002189</a>           | <a href="#">620316</a>    | predicted gene, ENSMUSG0000007 | <a href="#">ENSMUSG00000074670</a> | 0.961 | -0.42  | 0.686953 | 0.861886 |
| 12004 | 10463625 | <a href="#">NM_133694</a>          | <a href="#">68431</a>     | F-box and leucine-rich repeat  | <a href="#">Fbxl15</a>             | 0.961 | -1.015 | 0.343036 | 0.617132 |
| 12005 | 10545658 | <a href="#">NM_023790</a>          | <a href="#">75659</a>     | WD repeat domain 54            | <a href="#">Wdr54</a>              | 0.961 | -1.036 | 0.333561 | 0.609432 |
| 12006 | 10383970 | <a href="#">NM_032396</a>          | <a href="#">84035</a>     | kringle containing transmembra | <a href="#">Kremen1</a>            | 0.961 | -0.826 | 0.435102 | 0.695306 |
| 12007 | 10558405 | <a href="#">NM_183193</a>          | <a href="#">270004</a>    | forkhead box I2                | <a href="#">Foxi2</a>              | 0.961 | -0.793 | 0.453168 | 0.70973  |
| 12008 | 10401398 |                                    |                           |                                |                                    | 0.961 | -0.522 | 0.617593 | 0.823197 |
| 12009 | 10523579 | <a href="#">NM_029270</a>          | <a href="#">231532</a>    | Rho GTPase activating protein  | <a href="#">Arhgap24</a>           | 0.961 | -1.213 | 0.263312 | 0.538069 |
| 12010 | 10351015 | <a href="#">NM_080844</a>          | <a href="#">11905</a>     | serine (or cysteine) peptidase | <a href="#">Serpinc1</a>           | 0.961 | -0.559 | 0.593302 | 0.807893 |
| 12011 | 10598203 | <a href="#">NM_020279</a>          | <a href="#">56838</a>     | chemokine (C-C motif) ligand 2 | <a href="#">Ccl28</a>              | 0.961 | -0.229 | 0.824988 | 0.929578 |
| 12012 | 10372597 | <a href="#">XR_033859</a>          | <a href="#">544741</a>    | similar to ribosomal protein S | <a href="#">LOC544741</a>          | 0.961 | -0.847 | 0.42446  | 0.686543 |
| 12013 | 10423518 | <a href="#">NM_020503</a>          | <a href="#">57254</a>     | taste receptor, type 2, member | <a href="#">Tas2r119</a>           | 0.961 | -0.403 | 0.69876  | 0.868021 |
| 12014 | 10430096 | <a href="#">NM_198119</a>          | <a href="#">378937</a>    | leucine rich repeat containing | <a href="#">Lrrc24</a>             | 0.961 | -0.671 | 0.523023 | 0.759642 |
| 12015 | 10482273 | <a href="#">NM_029793</a>          | <a href="#">76899</a>     | golgi autoantigen, golgin subf | <a href="#">Golga1</a>             | 0.96  | -0.903 | 0.395828 | 0.663394 |
| 12016 | 10380275 | <a href="#">ENSMUST00000107892</a> | <a href="#">414094</a>    | RIKEN cDNA A930013B10 gene     | <a href="#">A930013B10Rik</a>      | 0.96  | -0.407 | 0.696013 | 0.866441 |
| 12017 | 10370334 | <a href="#">NM_145152</a>          | <a href="#">237387</a>    | leucine rich repeat containing | <a href="#">Lrrc3</a>              | 0.96  | -0.468 | 0.653527 | 0.844695 |
| 12018 | 10447006 | <a href="#">NM_028813</a>          | <a href="#">74199</a>     | vitrin                         | <a href="#">Vit</a>                | 0.96  | -0.393 | 0.705906 | 0.871814 |
| 12019 | 10368193 |                                    |                           |                                |                                    | 0.96  | -0.25  | 0.809489 | 0.923176 |
| 12020 | 10413989 | <a href="#">XM_985917</a>          | <a href="#">268729</a>    | gene model 626, (NCBI)         | <a href="#">Gm626</a>              | 0.96  | -0.596 | 0.569612 | 0.794081 |
| 12021 | 10394682 | <a href="#">XR_032386</a>          | <a href="#">633944</a>    | similar to Glyceraldehyde-3-ph | <a href="#">LOC633944</a>          | 0.96  | -0.297 | 0.774973 | 0.907674 |
| 12022 | 10524460 | <a href="#">NM_133904</a>          | <a href="#">100705</a>    | acetyl-Coenzyme A carboxylase  | <a href="#">Acacb</a>              | 0.96  | -0.656 | 0.532273 | 0.766334 |
| 12023 | 10529077 | <a href="#">NM_021290</a>          | <a href="#">22226</a>     | urocortin                      | <a href="#">Ucn</a>                | 0.96  | -0.343 | 0.741026 | 0.889595 |
| 12024 | 10391918 | <a href="#">NM_183034</a>          | <a href="#">353047</a>    | pleckstrin homology domain con | <a href="#">Plekhl1</a>            | 0.96  | -0.69  | 0.512018 | 0.75265  |
| 12025 | 10350335 | <a href="#">ENSMUST00000097558</a> | <a href="#">623818</a>    | predicted gene, EG623818       | <a href="#">EG623818</a>           | 0.96  | -0.319 | 0.759013 | 0.899129 |
| 12026 | 10366457 | <a href="#">NM_011217</a>          | <a href="#">19279</a>     | protein tyrosine phosphatase,  | <a href="#">Ptprr</a>              | 0.96  | -0.751 | 0.476552 | 0.72763  |
| 12027 | 10476353 |                                    |                           |                                |                                    | 0.96  | -0.549 | 0.599649 | 0.812038 |
| 12028 | 10344797 | <a href="#">AK032310</a>           | <a href="#">211660</a>    | centrosome and spindle pole as | <a href="#">Cspp1</a>              | 0.96  | -1.291 | 0.236612 | 0.508732 |
| 12029 | 10510629 | <a href="#">NM_028727</a>          | <a href="#">74035</a>     | nucleolar protein 9            | <a href="#">Nol9</a>               | 0.96  | -1.332 | 0.223416 | 0.493384 |
| 12030 | 10540738 | <a href="#">NM_001033244</a>       | <a href="#">211651</a>    | Fanconi anemia, complementatio | <a href="#">Fancd2</a>             | 0.96  | -1.022 | 0.339802 | 0.615188 |
| 12031 | 10412054 | <a href="#">AB183434</a>           | <a href="#">75597</a>     | NADH dehydrogenase (ubiquinone | <a href="#">Ndufaf2</a>            | 0.96  | -0.823 | 0.436663 | 0.696302 |
| 12032 | 10569542 | <a href="#">NM_175534</a>          | <a href="#">244238</a>    | MAS-related GPR, member E      | <a href="#">Mrgpre</a>             | 0.96  | -0.141 | 0.891928 | 0.95769  |
| 12033 | 10509410 | <a href="#">NM_001081155</a>       | <a href="#">110351</a>    | Rap1 GTPase-activating protein | <a href="#">Rap1gap</a>            | 0.96  | -0.752 | 0.475998 | 0.727266 |
| 12034 | 10567216 | <a href="#">NM_170669</a>          | <a href="#">267019</a>    | ribosomal protein S15a         | <a href="#">Rps15a</a>             | 0.96  | -0.547 | 0.60097  | 0.81267  |
| 12035 | 10593867 | <a href="#">NM_181074</a>          | <a href="#">235402</a>    | leucine rich repeat and Ig dom | <a href="#">Lingo1</a>             | 0.96  | -0.257 | 0.804144 | 0.920614 |
| 12036 | 10455919 | <a href="#">NM_175506</a>          | <a href="#">240322</a>    | a disintegrin-like and metallo | <a href="#">Adamts19</a>           | 0.96  | -0.278 | 0.788467 | 0.913849 |
| 12037 | 10413014 | <a href="#">NM_025366</a>          | <a href="#">66121</a>     | coiled-coil-helix-coiled-coil- | <a href="#">Chchd1</a>             | 0.96  | -1.348 | 0.21834  | 0.486434 |
| 12038 | 10381162 | <a href="#">NM_028024</a>          | <a href="#">71966</a>     | NFKB inhibitor interacting Ras | <a href="#">Nkiras2</a>            | 0.96  | -0.957 | 0.369379 | 0.639995 |
| 12039 | 10494322 | <a href="#">NM_023210</a>          | <a href="#">66471</a>     | acidic (leucine-rich) nuclear  | <a href="#">Anp32e</a>             | 0.96  | -0.863 | 0.416113 | 0.679215 |
| 12040 | 10456293 |                                    |                           |                                |                                    | 0.96  | -0.246 | 0.812748 | 0.924689 |
| 12041 | 10490602 | <a href="#">NM_007906</a>          | <a href="#">13628</a>     | eukaryotic translation elongat | <a href="#">Eef1a2</a>             | 0.96  | -0.686 | 0.514198 | 0.754507 |
| 12042 | 10420021 | <a href="#">ENSMUST00000066106</a> | <a href="#">320942</a>    | RIKEN cDNA A730061H03 gene     | <a href="#">A730061H03Rik</a>      | 0.96  | -1.019 | 0.340984 | 0.615921 |
| 12043 | 10448506 | <a href="#">NM_007634</a>          | <a href="#">12449</a>     | cyclin F                       | <a href="#">Ccnf</a>               | 0.96  | -0.552 | 0.59765  | 0.810721 |
| 12044 | 10521696 | <a href="#">ENSMUST00000072800</a> | <a href="#">100041413</a> | hypothetical protein LOC100041 | <a href="#">LOC100041413</a>       | 0.96  | -0.548 | 0.600045 | 0.812117 |
| 12045 | 10418167 | <a href="#">AK019686</a>           | <a href="#">68173</a>     | peptidylprolyl isomerase F, op | <a href="#">Ppifos</a>             | 0.96  | -0.013 | 0.989899 | 0.995644 |
| 12046 | 10537978 | <a href="#">ENSMUST00000043676</a> | <a href="#">243369</a>    | SCO-spondin                    | <a href="#">Sspo</a>               | 0.96  | -0.364 | 0.72656  | 0.881528 |
| 12047 | 10580771 | <a href="#">NM_134141</a>          | <a href="#">109006</a>    | cytokine induced apoptosis inh | <a href="#">Cianp1</a>             | 0.96  | -1.011 | 0.344857 | 0.618095 |

| 12047 | 1059771  | <a href="#">NM_171111</a>          | <a href="#">23282</a>  | cytokine-induced apoptosis in  | <a href="#">Casp1</a>              | 0.96  | 1.01   | 0.51102  | 0.81022  |
|-------|----------|------------------------------------|------------------------|--------------------------------|------------------------------------|-------|--------|----------|----------|
| 12048 | 10592449 | <a href="#">NM_207138</a>          | <a href="#">235256</a> | olfactory receptor 149         | <a href="#">Olf1r149</a>           | 0.96  | -0.504 | 0.6293   | 0.831256 |
| 12049 | 10470741 | <a href="#">NM_178693</a>          | <a href="#">227683</a> | coenzyme Q4 homolog (yeast)    | <a href="#">Coq4</a>               | 0.96  | -0.374 | 0.719458 | 0.877797 |
| 12050 | 10438328 | <a href="#">BC005445</a>           | <a href="#">27883</a>  | DNA segment, Chr 16, human D22 | <a href="#">D16H22S680E</a>        | 0.96  | -0.851 | 0.422072 | 0.684326 |
| 12051 | 10596275 | <a href="#">ENSMUST00000060084</a> | <a href="#">235567</a> | DnaJ (Hsp40) homolog, subfamil | <a href="#">Dnajc13</a>            | 0.96  | -0.67  | 0.523467 | 0.760167 |
| 12052 | 10538885 |                                    |                        |                                |                                    | 0.96  | -0.925 | 0.384715 | 0.654049 |
| 12053 | 10440600 | <a href="#">NM_009840</a>          | <a href="#">12469</a>  | chaperonin subunit 8 (theta)   | <a href="#">Cct8</a>               | 0.96  | -1.015 | 0.342783 | 0.617098 |
| 12054 | 10398453 | <a href="#">ENSMUST00000065483</a> | <a href="#">26931</a>  | protein phosphatase 2, regulat | <a href="#">Ppp2r5c</a>            | 0.96  | -0.836 | 0.429894 | 0.690652 |
| 12055 | 10418927 | <a href="#">NM_009758</a>          | <a href="#">12166</a>  | bone morphogenetic protein rec | <a href="#">Bmpr1a</a>             | 0.96  | -0.72  | 0.494374 | 0.739567 |
| 12056 | 10398569 | <a href="#">ENSMUST00000021699</a> | <a href="#">72805</a>  | RIKEN cDNA 2810455K09 gene     | <a href="#">2810455K09Rik</a>      | 0.96  | -0.834 | 0.430976 | 0.691603 |
| 12057 | 10562358 |                                    |                        |                                |                                    | 0.96  | -0.741 | 0.481838 | 0.730954 |
| 12058 | 10362243 |                                    |                        |                                |                                    | 0.96  | -0.703 | 0.504045 | 0.746397 |
| 12059 | 10471139 | <a href="#">NM_177649</a>          | <a href="#">665700</a> | hemiceptin 2                   | <a href="#">Hmen2</a>              | 0.96  | -0.27  | 0.794481 | 0.916545 |
| 12060 | 10352971 | <a href="#">ENSMUST00000097832</a> | <a href="#">654788</a> | RIKEN cDNA 4732440D04 gene     | <a href="#">4732440D04Rik</a>      | 0.96  | -0.431 | 0.678922 | 0.857533 |
| 12061 | 10518947 | <a href="#">NM_001099299</a>       | <a href="#">230959</a> | adherens junction associated p | <a href="#">Ajap1</a>              | 0.96  | -0.315 | 0.761426 | 0.900576 |
| 12062 | 10572089 | <a href="#">NM_010874</a>          | <a href="#">17961</a>  | N-acetyltransferase 2 (arylami | <a href="#">Nat2</a>               | 0.96  | -0.309 | 0.766119 | 0.902642 |
| 12063 | 10487366 | <a href="#">BC117065</a>           | <a href="#">329509</a> | RIKEN cDNA 1810024B03 gene     | <a href="#">1810024B03Rik</a>      | 0.96  | -0.689 | 0.512583 | 0.753008 |
| 12064 | 10547888 | <a href="#">NM_013533</a>          | <a href="#">14788</a>  | G protein-coupled receptor 162 | <a href="#">Gpr162</a>             | 0.96  | -1.097 | 0.307893 | 0.584494 |
| 12065 | 10434144 | <a href="#">NM_022982</a>          | <a href="#">65079</a>  | reticulon 4 receptor           | <a href="#">Rtn4r</a>              | 0.96  | -0.832 | 0.432016 | 0.692431 |
| 12066 | 10450167 | <a href="#">NM_030746</a>          | <a href="#">632126</a> | butyrophilin-like 4            | <a href="#">Btl4</a>               | 0.96  | -0.547 | 0.600607 | 0.812284 |
| 12067 | 10442638 | <a href="#">NM_023260</a>          | <a href="#">79044</a>  | mitochondrial ribosomal protei | <a href="#">Mrps34</a>             | 0.96  | -1.565 | 0.160204 | 0.407576 |
| 12068 | 10598678 | <a href="#">NM_009481</a>          | <a href="#">22284</a>  | ubiquitin specific peptidase 9 | <a href="#">Usp9x</a>              | 0.96  | -1.209 | 0.264927 | 0.540102 |
| 12069 | 10399430 | <a href="#">NM_134040</a>          | <a href="#">104721</a> | DEAD (Asp-Glu-Ala-Asp) box pol | <a href="#">Ddx1</a>               | 0.96  | -0.846 | 0.424697 | 0.686726 |
| 12070 | 10577030 | <a href="#">ENSMUST00000049461</a> | <a href="#">71941</a>  | cysteinyl-tRNA synthetase 2 (m | <a href="#">Cars2</a>              | 0.96  | -0.664 | 0.527334 | 0.762963 |
| 12071 | 10368859 | <a href="#">NM_001034858</a>       | <a href="#">213402</a> | armadillo repeat containing 2  | <a href="#">Armc2</a>              | 0.96  | -0.893 | 0.400724 | 0.666476 |
| 12072 | 10508936 | <a href="#">NM_026257</a>          | <a href="#">67586</a>  | UBX domain containing 5        | <a href="#">Ubx5</a>               | 0.96  | -0.988 | 0.355168 | 0.627794 |
| 12073 | 10420724 | <a href="#">NM_001039566</a>       | <a href="#">73670</a>  | defensin beta 30               | <a href="#">Defb30</a>             | 0.96  | -0.696 | 0.508443 | 0.750263 |
| 12074 | 10411532 | <a href="#">NM_030026</a>          | <a href="#">78038</a>  | methylcrotonoyl-Coenzyme A car | <a href="#">Mccc2</a>              | 0.96  | -0.49  | 0.638838 | 0.835923 |
| 12075 | 10401956 |                                    |                        |                                |                                    | 0.96  | -0.96  | 0.368112 | 0.639027 |
| 12076 | 10497673 | <a href="#">NM_009517</a>          | <a href="#">22401</a>  | zinc finger matrin type 3      | <a href="#">Zmat3</a>              | 0.96  | -0.416 | 0.689712 | 0.863782 |
| 12077 | 10460485 | <a href="#">NM_027476</a>          | <a href="#">70605</a>  | zinc finger, DHHC domain conta | <a href="#">Zdhhc24</a>            | 0.96  | -0.65  | 0.536064 | 0.769315 |
| 12078 | 10411711 | <a href="#">NM_009874</a>          | <a href="#">12572</a>  | cyclin-dependent kinase 7 (hom | <a href="#">Cdk7</a>               | 0.96  | -1.426 | 0.195689 | 0.456039 |
| 12079 | 10488982 | <a href="#">NM_170588</a>          | <a href="#">266692</a> | copine I                       | <a href="#">Cpne1</a>              | 0.96  | -1.097 | 0.307848 | 0.58446  |
| 12080 | 10445839 | <a href="#">NM_177052</a>          | <a href="#">319991</a> | kinesin family member 6        | <a href="#">Kif6</a>               | 0.96  | -0.118 | 0.909054 | 0.963765 |
| 12081 | 10373355 | <a href="#">NM_025716</a>          | <a href="#">66701</a>  | SPRY domain containing 4       | <a href="#">Spry4</a>              | 0.96  | -1.414 | 0.19907  | 0.460469 |
| 12082 | 10381960 | <a href="#">ENSMUST00000066077</a> | <a href="#">791371</a> | predicted gene, ENSMUSG0000005 | <a href="#">ENSMUSG00000053568</a> | 0.96  | -0.682 | 0.516247 | 0.755582 |
| 12083 | 10366275 |                                    |                        |                                |                                    | 0.959 | -0.543 | 0.603657 | 0.814811 |
| 12084 | 10528163 | <a href="#">XR_002130</a>          | <a href="#">668059</a> | predicted gene, EG668059       | <a href="#">EG668059</a>           | 0.959 | -0.889 | 0.402928 | 0.668092 |
| 12085 | 10517343 |                                    |                        |                                |                                    | 0.959 | -0.383 | 0.712693 | 0.874143 |
| 12086 | 10383436 | <a href="#">NM_026877</a>          | <a href="#">68938</a>  | alveolar soft part sarcoma chr | <a href="#">Aspscr1</a>            | 0.959 | -1.039 | 0.332246 | 0.608279 |
| 12087 | 10574365 | <a href="#">NM_172914</a>          | <a href="#">244608</a> | coiled-coil domain containing  | <a href="#">Ccdc113</a>            | 0.959 | -0.499 | 0.632448 | 0.832813 |
| 12088 | 10412385 | <a href="#">NM_021556</a>          | <a href="#">59054</a>  | mitochondrial ribosomal protei | <a href="#">Mrps30</a>             | 0.959 | -1.205 | 0.266427 | 0.541205 |
| 12089 | 10558631 | <a href="#">NM_175533</a>          | <a href="#">244234</a> | RIKEN cDNA 5830411N06 gene     | <a href="#">5830411N06Rik</a>      | 0.959 | -0.868 | 0.413435 | 0.677072 |
| 12090 | 10375886 | <a href="#">BC095931</a>           | <a href="#">97775</a>  | RIKEN cDNA D930048N14 gene     | <a href="#">D930048N14Rik</a>      | 0.959 | -0.835 | 0.430465 | 0.691254 |
| 12091 | 10502370 | <a href="#">NM_177860</a>          | <a href="#">329763</a> | predicted gene, EG329763       | <a href="#">EG329763</a>           | 0.959 | 0.236  | 0.820034 | 0.928345 |
| 12092 | 10573519 | <a href="#">NM_145390</a>          | <a href="#">212999</a> | transportin 2 (importin 3, kar | <a href="#">Tnpo2</a>              | 0.959 | -0.9   | 0.397142 | 0.664239 |
| 12093 | 10460371 | <a href="#">NM_016933</a>          | <a href="#">19265</a>  | protein tyrosine phosphatase,  | <a href="#">Ptpcap</a>             | 0.959 | -0.991 | 0.353951 | 0.626638 |
| 12094 | 10538201 | <a href="#">ENSMUST00000031839</a> | <a href="#">75593</a>  | RIKEN cDNA 2410003K15 gene     | <a href="#">2410003K15Rik</a>      | 0.959 | -0.666 | 0.526227 | 0.762249 |
| 12095 | 10371256 | <a href="#">NM_181586</a>          | <a href="#">50721</a>  | sirtuin 6 (silent mating type  | <a href="#">Sirt6</a>              | 0.959 | -1.183 | 0.274197 | 0.548913 |

|       |          |                                    |                           |                                 |                                        |       |        |          |          |
|-------|----------|------------------------------------|---------------------------|---------------------------------|----------------------------------------|-------|--------|----------|----------|
| 12096 | 10435031 | <a href="#">ENSMUST00000115151</a> | <a href="#">224111</a>    | UBX domain containing 7         | <a href="#">Ubx<sub>d7</sub></a>       | 0.959 | -0.735 | 0.485434 | 0.733791 |
| 12097 | 10444778 |                                    |                           |                                 |                                        | 0.959 | -0.266 | 0.797668 | 0.917953 |
| 12098 | 10409502 | <a href="#">NM_013739</a>          | <a href="#">27261</a>     | docking protein 3               | <a href="#">Dok3</a>                   | 0.959 | -0.306 | 0.767972 | 0.903579 |
| 12099 | 10604100 | <a href="#">NM_019443</a>          | <a href="#">54405</a>     | NADH dehydrogenase (ubiquinone) | <a href="#">Ndufa1</a>                 | 0.959 | -0.824 | 0.436499 | 0.696302 |
| 12100 | 10521667 | <a href="#">NM_009763</a>          | <a href="#">12182</a>     | bone marrow stromal cell antig  | <a href="#">Bst1</a>                   | 0.959 | -0.174 | 0.866304 | 0.946535 |
| 12101 | 10479008 | <a href="#">AK082914</a>           | <a href="#">100036524</a> | predicted gene, ENSMUSG0000005  | <a href="#">ENSMUSG00000053526</a>     | 0.959 | -0.589 | 0.573895 | 0.797007 |
| 12102 | 10601404 | <a href="#">NM_001033541</a>       | <a href="#">331493</a>    | predicted gene, EG331493        | <a href="#">EG331493</a>               | 0.959 | -0.277 | 0.789863 | 0.914502 |
| 12103 | 10599514 | <a href="#">NM_178782</a>          | <a href="#">320376</a>    | BCL6 co-repressor-like 1        | <a href="#">Bcor1</a>                  | 0.959 | -0.801 | 0.448861 | 0.706418 |
| 12104 | 10552193 | <a href="#">NM_021291</a>          | <a href="#">30962</a>     | solute carrier family 7 (catio  | <a href="#">Slc7a9</a>                 | 0.959 | -0.473 | 0.650248 | 0.843126 |
| 12105 | 10369295 | <a href="#">BC025117</a>           | <a href="#">52717</a>     | DNA segment, Chr 10, ERATO Doi  | <a href="#">D10Ert<sub>d641e</sub></a> | 0.959 | -1.262 | 0.246223 | 0.519211 |
| 12106 | 10410513 | <a href="#">NM_001040692</a>       | <a href="#">22598</a>     | solute carrier family 6 (neuro  | <a href="#">Slc6a18</a>                | 0.959 | -0.505 | 0.628624 | 0.830964 |
| 12107 | 10388747 |                                    |                           |                                 |                                        | 0.959 | -0.618 | 0.555599 | 0.784217 |
| 12108 | 10471018 | <a href="#">BC051404</a>           | <a href="#">108958</a>    | RIKEN cDNA 5730472N09 gene      | <a href="#">5730472N09Rik</a>          | 0.959 | -0.293 | 0.777739 | 0.909562 |
| 12109 | 10373751 |                                    |                           |                                 |                                        | 0.959 | -0.519 | 0.619338 | 0.82476  |
| 12110 | 10439583 | <a href="#">NM_198034</a>          | <a href="#">320007</a>    | SID1 transmembrane family, mem  | <a href="#">Sidt1</a>                  | 0.959 | 0.092  | 0.929121 | 0.972108 |
| 12111 | 10476653 | <a href="#">NM_207275</a>          | <a href="#">403171</a>    | barrier to autointegration fac  | <a href="#">Banf2</a>                  | 0.959 | 0.022  | 0.983422 | 0.992843 |
| 12112 | 10496322 |                                    |                           |                                 |                                        | 0.959 | -0.529 | 0.612464 | 0.820343 |
| 12113 | 10405191 | <a href="#">NM_029279</a>          | <a href="#">75420</a>     | SECIS binding protein 2         | <a href="#">Secisbp2</a>               | 0.959 | -0.899 | 0.397451 | 0.664302 |
| 12114 | 10375551 | <a href="#">NM_147065</a>          | <a href="#">259068</a>    | olfactory receptor 1390         | <a href="#">Olfr1390</a>               | 0.959 | 0.122  | 0.906514 | 0.963405 |
| 12115 | 10471045 | <a href="#">NM_138748</a>          | <a href="#">110854</a>    | protein phosphatase 2A, regula  | <a href="#">Ppp2r4</a>                 | 0.959 | -0.962 | 0.36737  | 0.638316 |
| 12116 | 10410134 | <a href="#">XR_033575</a>          | <a href="#">665612</a>    | similar to glucocorticoid rece  | <a href="#">LOC665612</a>              | 0.959 | -0.009 | 0.993232 | 0.997431 |
| 12117 | 10546936 | <a href="#">NM_172487</a>          | <a href="#">210673</a>    | proline-rich transmembrane pro  | <a href="#">Prrt3</a>                  | 0.959 | -0.431 | 0.67896  | 0.857533 |
| 12118 | 10465374 | <a href="#">NM_133678</a>          | <a href="#">66406</a>     | SAC3 domain containing 1        | <a href="#">Sac3d1</a>                 | 0.959 | -0.749 | 0.477559 | 0.728273 |
| 12119 | 10350478 | <a href="#">NM_001038592</a>       | <a href="#">69367</a>     | glutaredoxin 2 (thioltransfera  | <a href="#">Glx2</a>                   | 0.959 | -1.009 | 0.34583  | 0.619997 |
| 12120 | 10580765 | <a href="#">NM_026385</a>          | <a href="#">67801</a>     | plasma membrane proteolipid     | <a href="#">Plip</a>                   | 0.959 | -0.674 | 0.521126 | 0.758676 |
| 12121 | 10560311 |                                    |                           |                                 |                                        | 0.959 | -1.323 | 0.226375 | 0.496985 |
| 12122 | 10414449 | <a href="#">BC023094</a>           | <a href="#">74385</a>     | RIKEN cDNA 4932432K03 gene      | <a href="#">4932432K03Rik</a>          | 0.959 | -0.822 | 0.43715  | 0.696541 |
| 12123 | 10504658 |                                    |                           |                                 |                                        | 0.959 | -0.908 | 0.393376 | 0.661285 |
| 12124 | 10451220 | <a href="#">NM_025649</a>          | <a href="#">66591</a>     | MAD2L1 binding protein          | <a href="#">Mad211bp</a>               | 0.959 | -1.215 | 0.262781 | 0.537303 |
| 12125 | 10551989 | <a href="#">NM_145580</a>          | <a href="#">101883</a>    | transmembrane protein 149       | <a href="#">Tmem149</a>                | 0.959 | -0.922 | 0.386174 | 0.655109 |
| 12126 | 10463265 | <a href="#">NM_031396</a>          | <a href="#">83674</a>     | cyclin M1                       | <a href="#">Cnm1</a>                   | 0.959 | -0.598 | 0.568014 | 0.793164 |
| 12127 | 10493986 | <a href="#">NM_027762</a>          | <a href="#">71325</a>     | trichohyalin-like 1             | <a href="#">Tchhl1</a>                 | 0.959 | -0.187 | 0.856626 | 0.942035 |
| 12128 | 10569702 | <a href="#">NM_133190</a>          | <a href="#">81905</a>     | calcium channel, voltage-depen  | <a href="#">Cacng8</a>                 | 0.959 | -0.192 | 0.85311  | 0.940713 |
| 12129 | 10473517 |                                    |                           |                                 |                                        | 0.959 | -0.786 | 0.457013 | 0.712826 |
| 12130 | 10550320 |                                    |                           |                                 |                                        | 0.959 | -1.021 | 0.340135 | 0.615475 |
| 12131 | 10440593 | <a href="#">NM_016924</a>          | <a href="#">53858</a>     | RWD domain containing 2B        | <a href="#">Rwdd2b</a>                 | 0.959 | -0.749 | 0.477758 | 0.7284   |
| 12132 | 10552440 |                                    |                           |                                 |                                        | 0.959 | -0.799 | 0.449899 | 0.707208 |
| 12133 | 10554204 | <a href="#">NM_172902</a>          | <a href="#">244071</a>    | ATP/GTP binding protein-like 1  | <a href="#">Agbl1</a>                  | 0.959 | -0.531 | 0.611687 | 0.819835 |
| 12134 | 10521798 | <a href="#">BC018481</a>           | <a href="#">66768</a>     | RIKEN cDNA 4933428G09 gene      | <a href="#">4933428G09Rik</a>          | 0.959 | -1.023 | 0.339196 | 0.614614 |
| 12135 | 10379838 |                                    |                           |                                 |                                        | 0.959 | -0.784 | 0.458053 | 0.713343 |
| 12136 | 10347018 | <a href="#">NM_139270</a>          | <a href="#">213527</a>    | parathyroid hormone 2 receptor  | <a href="#">Pth2r</a>                  | 0.959 | 0.026  | 0.980328 | 0.991919 |
| 12137 | 10525452 | <a href="#">NM_030564</a>          | <a href="#">80751</a>     | ring finger protein 34          | <a href="#">Rnf34</a>                  | 0.959 | -0.774 | 0.463492 | 0.717691 |
| 12138 | 10475352 | <a href="#">NM_026318</a>          | <a href="#">67693</a>     | RIKEN cDNA 2310003F16 gene      | <a href="#">2310003F16Rik</a>          | 0.959 | -1.067 | 0.320356 | 0.597215 |
| 12139 | 10581636 | <a href="#">NM_001080930</a>       | <a href="#">52335</a>     | ataxin 1-like                   | <a href="#">Atxn1l</a>                 | 0.959 | -1.328 | 0.224611 | 0.494757 |
| 12140 | 10435004 | <a href="#">BC023715</a>           | <a href="#">66994</a>     | RIKEN cDNA 1500031L02 gene      | <a href="#">1500031L02Rik</a>          | 0.959 | -1.12  | 0.298798 | 0.574899 |
| 12141 | 10540269 | <a href="#">NM_008158</a>          | <a href="#">14761</a>     | G protein-coupled receptor 27   | <a href="#">Gpr27</a>                  | 0.959 | -0.439 | 0.673328 | 0.854824 |
| 12142 | 10527430 | <a href="#">NM_019767</a>          | <a href="#">56443</a>     | actin related protein 2/3 comp  | <a href="#">Arpe1a</a>                 | 0.959 | -1.306 | 0.231767 | 0.502487 |
| 12143 | 10573288 | <a href="#">NM_028877</a>          | <a href="#">74337</a>     | RIKEN cDNA 4432412L15 gene      | <a href="#">4432412L15Rik</a>          | 0.959 | -0.895 | 0.399575 | 0.665716 |
| 12144 | 10360454 | <a href="#">NM_010098</a>          | <a href="#">13603</a>     | opsin 3                         | <a href="#">Opn3</a>                   | 0.959 | -0.573 | 0.583997 | 0.80182  |
| 12145 | 10472153 |                                    |                           |                                 |                                        | 0.959 | -0.196 | 0.850337 | 0.939843 |
| 12146 | 10471298 | <a href="#">BC055116</a>           | <a href="#">227723</a>    | RIKEN cDNA 5830434P21 gene      | <a href="#">5830434P21Rik</a>          | 0.959 | -0.765 | 0.468482 | 0.720721 |
| 12147 | 10531899 | <a href="#">NM_178741</a>          | <a href="#">246293</a>    | kelch-like 8 (Drosophila)       | <a href="#">Klh8</a>                   | 0.959 | -0.514 | 0.622347 | 0.827136 |

|       |          |                                    |                           |                                |                                    |       |        |          |          |
|-------|----------|------------------------------------|---------------------------|--------------------------------|------------------------------------|-------|--------|----------|----------|
| 12148 | 10426835 | <a href="#">NM_172819</a>          | <a href="#">239667</a>    | DIP2 disco-interacting protein | <a href="#">Dip2b</a>              | 0.959 | -0.759 | 0.471835 | 0.72372  |
| 12149 | 10402179 | <a href="#">NM_211355</a>          | <a href="#">68734</a>     | SMEK homolog 1, suppressor of  | <a href="#">Smek1</a>              | 0.959 | -1.165 | 0.281146 | 0.556689 |
| 12150 | 10520952 | <a href="#">NM_172707</a>          | <a href="#">19046</a>     | protein phosphatase 1, catalyt | <a href="#">Ppp1cb</a>             | 0.959 | -1.265 | 0.245049 | 0.518209 |
| 12151 | 10601430 | <a href="#">XM_908498</a>          | <a href="#">71011</a>     | RIKEN cDNA 4933401B06 gene     | <a href="#">4933401B06Rik</a>      | 0.959 | -0.821 | 0.43788  | 0.697031 |
| 12152 | 10518300 | <a href="#">NM_011610</a>          | <a href="#">21938</a>     | tumor necrosis factor receptor | <a href="#">Tnfrsf1b</a>           | 0.959 | -0.856 | 0.419555 | 0.681865 |
| 12153 | 10597461 | <a href="#">NM_133978</a>          | <a href="#">102545</a>    | CKLF-like MARVEL transmembrane | <a href="#">Cmtm7</a>              | 0.959 | -0.81  | 0.443942 | 0.702635 |
| 12154 | 10437646 | <a href="#">NM_001099275</a>       | <a href="#">70426</a>     | tektin 5                       | <a href="#">Tekt5</a>              | 0.958 | -0.245 | 0.813312 | 0.9249   |
| 12155 | 10446596 | <a href="#">NM_177639</a>          | <a href="#">224997</a>    | discs, large (Drosophila) homo | <a href="#">Dlgap1</a>             | 0.958 | -0.313 | 0.763171 | 0.901493 |
| 12156 | 10535629 | <a href="#">NM_001033313</a>       | <a href="#">231887</a>    | PDGFA associated protein 1     | <a href="#">Pdap1</a>              | 0.958 | -1.246 | 0.251554 | 0.525573 |
| 12157 | 10465244 | <a href="#">NR_002847</a>          | <a href="#">72289</a>     | metastasis associated lung ade | <a href="#">Malat1</a>             | 0.958 | -0.405 | 0.697454 | 0.867333 |
| 12158 | 10421840 | <a href="#">NM_018765</a>          | <a href="#">22380</a>     | WW domain binding protein 4    | <a href="#">Wbp4</a>               | 0.958 | -1.37  | 0.21181  | 0.477389 |
| 12159 | 10425240 | <a href="#">NM_177461</a>          | <a href="#">27008</a>     | microtubule associated monoxyg | <a href="#">Mical1</a>             | 0.958 | -0.711 | 0.49971  | 0.742878 |
| 12160 | 10400137 | <a href="#">NM_013760</a>          | <a href="#">27362</a>     | DnaJ (Hsp40) homolog, subfamil | <a href="#">Dnajb9</a>             | 0.958 | -0.685 | 0.514708 | 0.754767 |
| 12161 | 10540679 | <a href="#">NM_145826</a>          | <a href="#">57890</a>     | interleukin 17 receptor E      | <a href="#">Il17re</a>             | 0.958 | -0.81  | 0.444104 | 0.702635 |
| 12162 | 10413710 | <a href="#">NM_027289</a>          | <a href="#">70021</a>     | 5'-nucleotidase domain contain | <a href="#">Nt5dc2</a>             | 0.958 | -1.144 | 0.289115 | 0.565029 |
| 12163 | 10585010 | <a href="#">NM_007468</a>          | <a href="#">11808</a>     | apolipoprotein A-IV            | <a href="#">Apoa4</a>              | 0.958 | -0.347 | 0.738241 | 0.88841  |
| 12164 | 10438681 | <a href="#">NM_201375</a>          | <a href="#">385643</a>    | kininogen 2                    | <a href="#">Kng2</a>               | 0.958 | -0.811 | 0.443207 | 0.70194  |
| 12165 | 10575473 | <a href="#">AK006604</a>           | <a href="#">672398</a>    | predicted gene, ENSMUSG0000006 | <a href="#">ENSMUSG00000067794</a> | 0.958 | -0.492 | 0.637356 | 0.83553  |
| 12166 | 10469129 | <a href="#">ENSMUST00000026889</a> | <a href="#">381347</a>    | RIKEN cDNA 4930412O13 gene     | <a href="#">4930412O13Rik</a>      | 0.958 | -0.49  | 0.638371 | 0.835923 |
| 12167 | 10389484 | <a href="#">NM_001114334</a>       | <a href="#">72508</a>     | ribosomal protein S6 kinase, p | <a href="#">Rps6kb1</a>            | 0.958 | -1.086 | 0.312234 | 0.58856  |
| 12168 | 10572445 | <a href="#">NM_153074</a>          | <a href="#">211228</a>    | leucine rich repeat containing | <a href="#">Lrrc25</a>             | 0.958 | -1.092 | 0.309802 | 0.586696 |
| 12169 | 10532901 | <a href="#">XR_033041</a>          | <a href="#">676123</a>    | hypothetical protein LOC676123 | <a href="#">LOC676123</a>          | 0.958 | -0.996 | 0.35146  | 0.624753 |
| 12170 | 10514350 |                                    |                           |                                |                                    | 0.958 | -0.772 | 0.464585 | 0.718344 |
| 12171 | 10385572 | <a href="#">NM_011018</a>          | <a href="#">18412</a>     | sequestosome 1                 | <a href="#">Sqstm1</a>             | 0.958 | -1.23  | 0.257349 | 0.531592 |
| 12172 | 10384762 | <a href="#">ENSMUST00000068360</a> | <a href="#">268391</a>    | RIKEN cDNA A830031A19 gene     | <a href="#">A830031A19Rik</a>      | 0.958 | -0.565 | 0.589483 | 0.805725 |
| 12173 | 10475448 | <a href="#">NM_025777</a>          | <a href="#">66811</a>     | dual oxidase maturation factor | <a href="#">Duoxa2</a>             | 0.958 | -1.096 | 0.308277 | 0.585058 |
| 12174 | 10557317 | <a href="#">NM_029842</a>          | <a href="#">77035</a>     | jumonji domain containing 5    | <a href="#">Jmjd5</a>              | 0.958 | -0.596 | 0.569552 | 0.794081 |
| 12175 | 10524969 | <a href="#">NM_007545</a>          | <a href="#">12123</a>     | harakiri, BCL2 interacting pro | <a href="#">Hrk</a>                | 0.958 | -0.555 | 0.595735 | 0.809631 |
| 12176 | 10350286 | <a href="#">NM_026500</a>          | <a href="#">67997</a>     | DEAD (Asp-Glu-Ala-Asp) box pol | <a href="#">Ddx59</a>              | 0.958 | -1.06  | 0.323488 | 0.599986 |
| 12177 | 10373334 | <a href="#">NM_013786</a>          | <a href="#">27400</a>     | hydroxysteroid (17-beta) dehyd | <a href="#">Hsd17b6</a>            | 0.958 | -0.364 | 0.726432 | 0.881516 |
| 12178 | 10607774 | <a href="#">NM_029730</a>          | <a href="#">76763</a>     | motile sperm domain containing | <a href="#">Mospd2</a>             | 0.958 | -0.604 | 0.564429 | 0.790721 |
| 12179 | 10536799 | <a href="#">NM_001101486</a>       | <a href="#">245884</a>    | expressed sequence AI507611    | <a href="#">AI507611</a>           | 0.958 | -0.767 | 0.46749  | 0.720274 |
| 12180 | 10483322 |                                    |                           |                                |                                    | 0.958 | -0.625 | 0.551148 | 0.781221 |
| 12181 | 10489492 | <a href="#">ENSMUST00000017864</a> | <a href="#">73603</a>     | RIKEN cDNA 1700126L10 gene     | <a href="#">1700126L10Rik</a>      | 0.958 | -0.599 | 0.567812 | 0.792987 |
| 12182 | 10445826 | <a href="#">NM_020042</a>          | <a href="#">56738</a>     | molybdenum cofactor synthesis  | <a href="#">Mocs1</a>              | 0.958 | -1.052 | 0.326765 | 0.602837 |
| 12183 | 10415119 | <a href="#">NM_019402</a>          | <a href="#">54196</a>     | poly(A) binding protein, nucle | <a href="#">Pabpn1</a>             | 0.958 | -1.063 | 0.322058 | 0.598804 |
| 12184 | 10368077 | <a href="#">ENSMUST00000095817</a> | <a href="#">100039660</a> | hypothetical protein LOC100039 | <a href="#">LOC100039660</a>       | 0.958 | -0.311 | 0.764957 | 0.902279 |
| 12185 | 10569886 | <a href="#">NM_025701</a>          | <a href="#">66682</a>     | trafficking protein particle c | <a href="#">Trappc5</a>            | 0.958 | -0.741 | 0.482084 | 0.730954 |
| 12186 | 10435793 | <a href="#">NM_007877</a>          | <a href="#">13490</a>     | dopamine receptor 3            | <a href="#">Drd3</a>               | 0.958 | -0.693 | 0.509939 | 0.751318 |
| 12187 | 10477311 | <a href="#">NM_001039939</a>       | <a href="#">228790</a>    | additional sex combs like 1 (D | <a href="#">Asxl1</a>              | 0.958 | -1.142 | 0.290112 | 0.566261 |
| 12188 | 10448690 | <a href="#">NM_001099664</a>       | <a href="#">381073</a>    | neuropeptide W                 | <a href="#">Npw</a>                | 0.958 | -0.622 | 0.553151 | 0.782697 |
| 12189 | 10450878 | <a href="#">NM_146833</a>          | <a href="#">258830</a>    | olfactory receptor 103         | <a href="#">Olfr103</a>            | 0.958 | 0.059  | 0.95481  | 0.982696 |
| 12190 | 10419469 |                                    |                           |                                |                                    | 0.958 | -0.454 | 0.663115 | 0.849961 |
| 12191 | 10348645 | <a href="#">NM_022320</a>          | <a href="#">64095</a>     | G protein-coupled receptor 35  | <a href="#">Gpr35</a>              | 0.958 | -0.564 | 0.590036 | 0.805977 |
| 12192 | 10348635 | <a href="#">NM_147037</a>          | <a href="#">259039</a>    | olfactory receptor 1413        | <a href="#">Olfr1413</a>           | 0.958 | -0.304 | 0.769718 | 0.904715 |
| 12193 | 10365302 | <a href="#">NM_001033375</a>       | <a href="#">319277</a>    | RIKEN cDNA A230046K03 gene     | <a href="#">A230046K03Rik</a>      | 0.958 | -0.875 | 0.409968 | 0.674344 |
| 12194 | 10517159 | <a href="#">NM_145833</a>          | <a href="#">83557</a>     | lin-28 homolog (C. elegans)    | <a href="#">Lin28</a>              | 0.958 | -0.537 | 0.607108 | 0.817118 |
| 12195 | 10566079 | <a href="#">NM_007491</a>          | <a href="#">11875</a>     | ADP-ribosyltransferase 5       | <a href="#">Art5</a>               | 0.958 | -0.398 | 0.702376 | 0.869396 |
| 12196 | 10490119 | <a href="#">NM_001039560</a>       | <a href="#">654821</a>    | glucosaminyl (N-acetyl) transf | <a href="#">Gent7</a>              | 0.958 | -0.294 | 0.777156 | 0.909278 |
| 12197 | 10522186 | <a href="#">NM_001081104</a>       | <a href="#">231252</a>    | cholinergic receptor, nicotini | <a href="#">Chrna9</a>             | 0.958 | -0.386 | 0.710886 | 0.873183 |
| 12198 | 10526735 | <a href="#">NM_011757</a>          | <a href="#">22697</a>     | zinc finger and SCAN domain co | <a href="#">Zscan21</a>            | 0.958 | -0.906 | 0.394341 | 0.662004 |

|       |          |                                    |                           |                                 |                                    |       |        |           |          |
|-------|----------|------------------------------------|---------------------------|---------------------------------|------------------------------------|-------|--------|-----------|----------|
| 12199 | 10418131 | <a href="#">NM_001081247</a>       | <a href="#">218832</a>    | polymerase (RNA) III (DNA dire  | <a href="#">Polr3a</a>             | 0.958 | -1.152 | 0.286198  | 0.561664 |
| 12200 | 10389151 | <a href="#">NM_181542</a>          | <a href="#">237887</a>    | schlafen 10                     | <a href="#">Slfn10</a>             | 0.958 | -0.719 | 0.494625  | 0.739629 |
| 12201 | 10515352 | <a href="#">NM_021473</a>          | <a href="#">58810</a>     | aldo-keto reductase family 1,   | <a href="#">Akr1a4</a>             | 0.958 | -1.166 | 0.280822  | 0.556319 |
| 12202 | 10379762 |                                    |                           |                                 |                                    | 0.958 | 0.062  | 0.952544  | 0.981606 |
| 12203 | 10509039 | <a href="#">NM_030189</a>          | <a href="#">78806</a>     | RIKEN cDNA 4930555121 gene      | <a href="#">4930555121Rik</a>      | 0.958 | -0.759 | 0.471648  | 0.72359  |
| 12204 | 10515839 | <a href="#">ENSMUST00000097910</a> | <a href="#">100038571</a> | predicted gene, OTTMUSG0000000  | <a href="#">OTTMUSG00000008822</a> | 0.958 | -0.308 | 0.766871  | 0.902924 |
| 12205 | 10381218 | <a href="#">NM_010475</a>          | <a href="#">15485</a>     | hydroxysteroid (17-beta) dehyd  | <a href="#">Hsd17b1</a>            | 0.958 | -0.143 | 0.890125  | 0.956731 |
| 12206 | 10391424 | <a href="#">XM_894901</a>          | <a href="#">629949</a>    | similar to ribosomal protein L  | <a href="#">LOC629949</a>          | 0.958 | -0.7   | 0.505583  | 0.747576 |
| 12207 | 10348664 |                                    |                           |                                 |                                    | 0.958 | -0.633 | 0.546372  | 0.777695 |
| 12208 | 10372965 | <a href="#">NM_027604</a>          | <a href="#">14479</a>     | ubiquitin specific peptidase 1  | <a href="#">Usp15</a>              | 0.958 | -1.005 | 0.347519  | 0.621575 |
| 12209 | 10420097 | <a href="#">NM_145705</a>          | <a href="#">28113</a>     | Terf1 (TRF1)-interacting nucle  | <a href="#">Tinf2</a>              | 0.958 | -0.957 | 0.369526  | 0.640116 |
| 12210 | 10352767 | <a href="#">NM_010892</a>          | <a href="#">18005</a>     | NIMA (never in mitosis gene a)  | <a href="#">Nek2</a>               | 0.958 | -0.436 | 0.675876  | 0.855911 |
| 12211 | 10572772 | <a href="#">NM_197944</a>          | <a href="#">209488</a>    | hematopoietic SH2 domain conta  | <a href="#">Hsh2d</a>              | 0.958 | -0.746 | 0.479187  | 0.729179 |
| 12212 | 10376813 | <a href="#">NM_001029936</a>       | <a href="#">432572</a>    | sperm antigen with calponin ho  | <a href="#">Specc1</a>             | 0.958 | -0.869 | 0.412605  | 0.676183 |
| 12213 | 10502934 | <a href="#">NM_011231</a>          | <a href="#">19352</a>     | RAB geranylgeranyl transferase  | <a href="#">Rabggtb</a>            | 0.958 | -1.302 | 0.233025  | 0.50405  |
| 12214 | 10579262 | <a href="#">NM_001004062</a>       | <a href="#">382056</a>    | CREB regulated transcription c  | <a href="#">Crtc1</a>              | 0.958 | -1.053 | 0.326344  | 0.602796 |
| 12215 | 10596931 | <a href="#">NM_031392</a>          | <a href="#">83669</a>     | WD repeat domain 6              | <a href="#">Wdr6</a>               | 0.958 | -0.855 | 0.420144  | 0.682455 |
| 12216 | 10460273 | <a href="#">NM_001001320</a>       | <a href="#">109575</a>    | T-box 10                        | <a href="#">Tbx10</a>              | 0.958 | -0.614 | 0.557901  | 0.785788 |
| 12217 | 10411690 | <a href="#">NM_011233</a>          | <a href="#">19356</a>     | RAD17 homolog (S. pombe)        | <a href="#">Rad17</a>              | 0.958 | -0.781 | 0.45963   | 0.714537 |
| 12218 | 10369379 | <a href="#">NM_023596</a>          | <a href="#">71279</a>     | solute carrier family 29 (nucl  | <a href="#">Slc29a3</a>            | 0.958 | -0.248 | 0.810876  | 0.923749 |
| 12219 | 10408523 |                                    |                           |                                 |                                    | 0.958 | -0.658 | 0.530778  | 0.76539  |
| 12220 | 10601471 | <a href="#">XM_887733</a>          | <a href="#">385407</a>    | predicted gene, EG385407        | <a href="#">EG385407</a>           | 0.958 | -1.193 | 0.270645  | 0.545314 |
| 12221 | 10362939 | <a href="#">XM_894477</a>          | <a href="#">215974</a>    | predicted gene, EG215974        | <a href="#">EG215974</a>           | 0.958 | -0.369 | 0.722789  | 0.87962  |
| 12222 | 10523231 | <a href="#">NM_181728</a>          | <a href="#">109979</a>    | ADP-ribosyltransferase 3        | <a href="#">Art3</a>               | 0.958 | -0.027 | 0.979439  | 0.99187  |
| 12223 | 10525877 | <a href="#">NM_001081750</a>       | <a href="#">269704</a>    | zinc finger protein 664         | <a href="#">Zfp664</a>             | 0.958 | -1.44  | 0.191715  | 0.451028 |
| 12224 | 10521892 | <a href="#">NM_011402</a>          | <a href="#">20531</a>     | solute carrier family 34 (sodi  | <a href="#">Slc34a2</a>            | 0.958 | -0.185 | 0.858202  | 0.943082 |
| 12225 | 10557300 | <a href="#">NM_007474</a>          | <a href="#">11833</a>     | aquaporin 8                     | <a href="#">Aqp8</a>               | 0.958 | -0.153 | 0.882779  | 0.953745 |
| 12226 | 10382565 | <a href="#">NM_025305</a>          | <a href="#">50529</a>     | mitochondrial ribosomal protein | <a href="#">Mrps7</a>              | 0.958 | -2.091 | 0.0737361 | 0.256638 |
| 12227 | 10468239 | <a href="#">NM_007809</a>          | <a href="#">13074</a>     | cytochrome P450, family 17, su  | <a href="#">Cyp17a1</a>            | 0.957 | -0.672 | 0.522488  | 0.759283 |
| 12228 | 10374450 | <a href="#">XR_033115</a>          | <a href="#">635455</a>    | hypothetical LOC635455          | <a href="#">LOC635455</a>          | 0.957 | -0.903 | 0.395799  | 0.663394 |
| 12229 | 10391854 | <a href="#">BC100507</a>           | <a href="#">69441</a>     | RIKEN cDNA 1700023F06 gene      | <a href="#">1700023F06Rik</a>      | 0.957 | -1.114 | 0.301205  | 0.577397 |
| 12230 | 10373027 | <a href="#">NM_025982</a>          | <a href="#">67125</a>     | tetraspanin 31                  | <a href="#">Tspan31</a>            | 0.957 | -0.964 | 0.366344  | 0.637372 |
| 12231 | 10514392 | <a href="#">NM_026954</a>          | <a href="#">69136</a>     | tumor suppressor candidate 1    | <a href="#">Tusc1</a>              | 0.957 | -1.146 | 0.288586  | 0.564651 |
| 12232 | 10450669 | <a href="#">NM_145487</a>          | <a href="#">75210</a>     | proline-rich polypeptide 3      | <a href="#">Prr3</a>               | 0.957 | -1.142 | 0.289946  | 0.566234 |
| 12233 | 10569102 | <a href="#">NM_016850</a>          | <a href="#">54123</a>     | interferon regulatory factor 7  | <a href="#">Irf7</a>               | 0.957 | -0.008 | 0.99421   | 0.997702 |
| 12234 | 10531415 | <a href="#">NM_021274</a>          | <a href="#">15945</a>     | chemokine (C-X-C motif) ligand  | <a href="#">Cxcl10</a>             | 0.957 | -0.4   | 0.700755  | 0.868962 |
| 12235 | 10473779 | <a href="#">ENSMUST0000011449</a>  | <a href="#">13046</a>     | CUG triplet repeat, RNA bindin  | <a href="#">Cugbp1</a>             | 0.957 | -1.099 | 0.306999  | 0.583635 |
| 12236 | 10591706 | <a href="#">NM_010487</a>          | <a href="#">15571</a>     | ELAV (embryonic lethal, abnorm  | <a href="#">Elavl3</a>             | 0.957 | -0.4   | 0.700705  | 0.868962 |
| 12237 | 10407348 |                                    |                           |                                 |                                    | 0.957 | -0.957 | 0.369396  | 0.639995 |
| 12238 | 10495987 | <a href="#">DQ851564</a>           | <a href="#">435755</a>    | POU domain, class 5, transcrip  | <a href="#">LOC435755</a>          | 0.957 | -0.765 | 0.46831   | 0.720616 |
| 12239 | 10382573 | <a href="#">NM_028014</a>          | <a href="#">71947</a>     | RIKEN cDNA 2310067B10 gene      | <a href="#">2310067B10Rik</a>      | 0.957 | -0.839 | 0.428582  | 0.689543 |
| 12240 | 10470412 | <a href="#">NM_138942</a>          | <a href="#">13166</a>     | dopamine beta hydroxylase       | <a href="#">Dbh</a>                | 0.957 | -0.912 | 0.39138   | 0.659653 |
| 12241 | 10436037 |                                    |                           |                                 |                                    | 0.957 | -1.086 | 0.31241   | 0.588786 |
| 12242 | 10527575 | <a href="#">NM_028291</a>          | <a href="#">72587</a>     | PAN3 polyA specific ribonuclea  | <a href="#">Pan3</a>               | 0.957 | -0.783 | 0.458667  | 0.713672 |
| 12243 | 10480381 | <a href="#">NM_001081364</a>       | <a href="#">71435</a>     | Rho GTPase activating protein   | <a href="#">Arhgap21</a>           | 0.957 | -0.84  | 0.428018  | 0.689167 |
| 12244 | 10408113 | <a href="#">NM_175656</a>          | <a href="#">319158</a>    | histone cluster 1, H4i          | <a href="#">Hist1h4i</a>           | 0.957 | -1.046 | 0.32954   | 0.60586  |
| 12245 | 10455695 | <a href="#">NM_026040</a>          | <a href="#">67222</a>     | serum response factor binding   | <a href="#">Srfbp1</a>             | 0.957 | -1.023 | 0.339181  | 0.614614 |
| 12246 | 10475665 | <a href="#">NM_019729</a>          | <a href="#">84092</a>     | ubiquitin specific peptidase 8  | <a href="#">Usp8</a>               | 0.957 | -1.575 | 0.158079  | 0.405065 |
| 12247 | 10532032 | <a href="#">NM_001005477</a>       | <a href="#">104382</a>    | BarH-like 2 (Drosophila)        | <a href="#">Barhl2</a>             | 0.957 | -0.687 | 0.513602  | 0.754034 |
| 12248 | 10439532 | <a href="#">NM_029128</a>          | <a href="#">106248</a>    | queuine tRNA-ribosyltransferas  | <a href="#">Qtrtd1</a>             | 0.957 | -0.955 | 0.370688  | 0.641417 |
| 12249 | 10562965 | <a href="#">NM_007458</a>          | <a href="#">11771</a>     | adaptor protein complex AP-2,   | <a href="#">Ap2a1</a>              | 0.957 | -0.747 | 0.478715  | 0.729103 |
| 12250 | 10595671 |                                    |                           |                                 |                                    | 0.957 | 0.069  | 0.946945  | 0.978938 |
| 12251 | 10488233 | <a href="#">ENSMUST00000099292</a> | <a href="#">433481</a>    | predicted gene, EG433481        | <a href="#">EG433481</a>           | 0.957 | -0.379 | 0.715829  | 0.875402 |

|       |          |                                    |                        |                                                          |                               |       |        |          |          |
|-------|----------|------------------------------------|------------------------|----------------------------------------------------------|-------------------------------|-------|--------|----------|----------|
| 12252 | 10590985 | <a href="#">NM_019482</a>          | <a href="#">25991</a>  | pannexin 1                                               | <a href="#">Panx1</a>         | 0.957 | -1.234 | 0.256054 | 0.530431 |
| 12253 | 10591270 | <a href="#">NM_173777</a>          | <a href="#">244723</a> | olfactomedin 2                                           | <a href="#">Olfm2</a>         | 0.957 | -0.45  | 0.666213 | 0.851266 |
| 12254 | 10449893 | <a href="#">NM_178785</a>          | <a href="#">320484</a> | RIKEN cDNA A430107D22 gene                               | <a href="#">A430107D22Rik</a> | 0.957 | -0.967 | 0.36479  | 0.635871 |
| 12255 | 10518464 | <a href="#">BC060239</a>           | <a href="#">70433</a>  | RIKEN cDNA 2610109H07 gene                               | <a href="#">2610109H07Rik</a> | 0.957 | -0.329 | 0.751627 | 0.895256 |
| 12256 | 10401527 | <a href="#">NM_013589</a>          | <a href="#">16997</a>  | latent transforming growth fac                           | <a href="#">Ltbp2</a>         | 0.957 | -0.281 | 0.78654  | 0.912916 |
| 12257 | 10355341 |                                    |                        |                                                          |                               | 0.957 | -0.911 | 0.391823 | 0.660136 |
| 12258 | 10376314 | <a href="#">NM_026949</a>          | <a href="#">69125</a>  | CCR4-NOT transcription complex                           | <a href="#">Cnot8</a>         | 0.957 | -1.183 | 0.274518 | 0.54916  |
| 12259 | 10591087 | <a href="#">NM_145712</a>          | <a href="#">244701</a> | melatonin receptor 1B                                    | <a href="#">Mtnr1b</a>        | 0.957 | 0.059  | 0.954331 | 0.98249  |
| 12260 | 10466515 | <a href="#">NM_008023</a>          | <a href="#">14240</a>  | forkhead box B2                                          | <a href="#">Foxb2</a>         | 0.957 | -0.429 | 0.680356 | 0.858268 |
| 12261 | 10466104 | <a href="#">NM_023731</a>          | <a href="#">108673</a> | coiled-coil domain containing                            | <a href="#">Ccdc86</a>        | 0.957 | -1.228 | 0.257979 | 0.531958 |
| 12262 | 10532652 | <a href="#">NM_007773</a>          | <a href="#">12961</a>  | crystallin, beta B2                                      | <a href="#">Crybb2</a>        | 0.957 | -0.334 | 0.747996 | 0.893185 |
| 12263 | 10386442 | <a href="#">NM_011991</a>          | <a href="#">26572</a>  | COP9 (constitutive photomorpho                           | <a href="#">Cops3</a>         | 0.957 | -1.309 | 0.230729 | 0.501597 |
| 12264 | 10350725 | <a href="#">NM_026380</a>          | <a href="#">67792</a>  | regulator of G-protein signali                           | <a href="#">Rgs8</a>          | 0.957 | -0.245 | 0.813228 | 0.9249   |
| 12265 | 10497276 | <a href="#">BC030910</a>           | <a href="#">75497</a>  | RIKEN cDNA 1700008G05 gene                               | <a href="#">1700008G05Rik</a> | 0.957 | 0.024  | 0.981577 | 0.992092 |
| 12266 | 10570450 | <a href="#">NM_172910</a>          | <a href="#">244310</a> | discs, large (Drosophila) homo                           | <a href="#">Dlgap2</a>        | 0.957 | -0.87  | 0.41219  | 0.676028 |
| 12267 | 10457585 |                                    |                        |                                                          |                               | 0.957 | -0.968 | 0.36433  | 0.635557 |
| 12268 | 10453456 | <a href="#">NM_199251</a>          | <a href="#">210741</a> | potassium channel, subfamily K-lorsin family 3, member A | <a href="#">Kcnk12</a>        | 0.957 | -0.448 | 0.667342 | 0.851505 |
| 12269 | 10359181 | <a href="#">NM_023141</a>          | <a href="#">30935</a>  |                                                          |                               |       |        |          |          |
| 12270 | 10441489 | <a href="#">NM_181392</a>          | <a href="#">66467</a>  | general transcription factor I                           | <a href="#">Gtf2h5</a>        | 0.957 | -1.158 | 0.283629 | 0.558905 |
| 12271 | 10560851 | <a href="#">NR_003638</a>          | <a href="#">69301</a>  | RIKEN cDNA 1700008P20 gene                               | <a href="#">1700008P20Rik</a> | 0.957 | -0.321 | 0.757462 | 0.898154 |
| 12272 | 10467344 | <a href="#">NM_021315</a>          | <a href="#">57753</a>  | nucleolar complex associated 3                           | <a href="#">Noc3l</a>         | 0.957 | -0.992 | 0.353224 | 0.625979 |
| 12273 | 10499545 | <a href="#">NM_010108</a>          | <a href="#">13638</a>  | ephrin A3                                                | <a href="#">Efn3</a>          | 0.957 | -0.274 | 0.791965 | 0.915332 |
| 12274 | 10449596 |                                    |                        |                                                          |                               | 0.957 | -0.195 | 0.850575 | 0.939883 |
| 12275 | 10540271 |                                    |                        |                                                          |                               | 0.957 | -1.04  | 0.331912 | 0.608173 |
| 12276 | 10588638 | <a href="#">NM_019704</a>          | <a href="#">56395</a>  | transmembrane protein 115                                | <a href="#">Tmem115</a>       | 0.957 | -1.143 | 0.28961  | 0.565682 |
| 12277 | 10540727 | <a href="#">NM_133930</a>          | <a href="#">171508</a> | cysteine-rich with EGF-like do                           | <a href="#">Creld1</a>        | 0.957 | -1.182 | 0.274554 | 0.54916  |
| 12278 | 10420302 | <a href="#">NM_010371</a>          | <a href="#">14940</a>  | granzyme C                                               | <a href="#">Gzmc</a>          | 0.957 | 0.085  | 0.934294 | 0.97382  |
| 12279 | 10407833 | <a href="#">NM_010282</a>          | <a href="#">14593</a>  | geranylgeranyl diphosphate syn                           | <a href="#">Ggps1</a>         | 0.957 | -0.997 | 0.35124  | 0.624559 |
| 12280 | 10444810 | <a href="#">ENSMUST00000105041</a> | <a href="#">15013</a>  | histocompatibility 2, Q region                           | <a href="#">H2-Q2</a>         | 0.957 | -0.106 | 0.918495 | 0.967805 |
| 12281 | 10529977 | <a href="#">ENSMUST00000053488</a> | <a href="#">19017</a>  | peroxisome proliferative activ                           | <a href="#">Ppargc1a</a>      | 0.957 | -0.039 | 0.969734 | 0.987719 |
| 12282 | 10448998 |                                    |                        |                                                          |                               | 0.957 | -0.376 | 0.717768 | 0.876765 |
| 12283 | 10527133 | <a href="#">NM_178398</a>          | <a href="#">74781</a>  | WD repeat domain, phosphoinosi                           | <a href="#">Wipi2</a>         | 0.957 | -0.629 | 0.548744 | 0.779171 |
| 12284 | 10398966 | <a href="#">NM_029381</a>          | <a href="#">75671</a>  | testis expressed gene 22                                 | <a href="#">Tex22</a>         | 0.957 | -0.874 | 0.410385 | 0.67479  |
| 12285 | 10438672 | <a href="#">NM_001081368</a>       | <a href="#">70573</a>  | TBCC domain containing 1                                 | <a href="#">Tbccd1</a>        | 0.957 | -1.482 | 0.180711 | 0.436631 |
| 12286 | 10579422 | <a href="#">NM_032397</a>          | <a href="#">84036</a>  | potassium intermediate/small c                           | <a href="#">Kenn1</a>         | 0.957 | -0.536 | 0.607836 | 0.817473 |
| 12287 | 10362874 | <a href="#">ENSMUST00000053792</a> | <a href="#">74530</a>  | RIKEN cDNA 9030612E09 gene                               | <a href="#">9030612E09Rik</a> | 0.957 | -0.492 | 0.637099 | 0.835244 |
| 12288 | 10502440 |                                    |                        |                                                          |                               | 0.957 | -1.04  | 0.331937 | 0.608173 |
| 12289 | 10354227 |                                    |                        |                                                          |                               | 0.957 | -0.614 | 0.558268 | 0.786038 |
| 12290 | 10454807 | <a href="#">NR_002905</a>          | <a href="#">436583</a> | small nucleolar RNA, H/ACA box                           | <a href="#">Snora74a</a>      | 0.957 | -0.367 | 0.724465 | 0.880611 |
| 12291 | 10606149 | <a href="#">NM_027591</a>          | <a href="#">70887</a>  | DMRT-like family C1a                                     | <a href="#">Dmrte1a</a>       | 0.957 | -0.631 | 0.547219 | 0.778305 |
| 12292 | 10478409 | <a href="#">NM_001039390</a>       | <a href="#">18769</a>  | protein kinase inhibitor, gamm                           | <a href="#">Pki3</a>          | 0.957 | -1.044 | 0.330127 | 0.606499 |
| 12293 | 10587488 | <a href="#">BC096613</a>           | <a href="#">75033</a>  | RIKEN cDNA 4930486G11 gene                               | <a href="#">4930486G11Rik</a> | 0.957 | -0.425 | 0.683389 | 0.859874 |
| 12294 | 10527455 | <a href="#">NM_178576</a>          | <a href="#">54188</a>  | cleavage and polyadenylation s                           | <a href="#">Cpsf4</a>         | 0.957 | -0.815 | 0.44141  | 0.700321 |
| 12295 | 10443912 | <a href="#">NM_153063</a>          | <a href="#">224691</a> | zinc finger protein 472                                  | <a href="#">Zfp472</a>        | 0.957 | -0.59  | 0.573258 | 0.796645 |
| 12296 | 10356299 | <a href="#">NM_001033290</a>       | <a href="#">227326</a> | G protein-coupled receptor 55                            | <a href="#">Gpr55</a>         | 0.957 | -0.058 | 0.955083 | 0.982833 |
| 12297 | 10396076 | <a href="#">AK034052</a>           | <a href="#">414085</a> | RIKEN cDNA 9330151L19 gene                               | <a href="#">9330151L19Rik</a> | 0.957 | -0.932 | 0.38137  | 0.651086 |
| 12298 | 10431802 | <a href="#">NM_008971</a>          | <a href="#">19230</a>  | twinfilin, actin-binding prote                           | <a href="#">Twf1</a>          | 0.957 | -1.079 | 0.315355 | 0.592275 |
| 12299 | 10390748 | <a href="#">NM_172564</a>          | <a href="#">217169</a> | tensin 4                                                 | <a href="#">Tns4</a>          | 0.957 | -0.293 | 0.777941 | 0.909621 |
| 12300 | 10427159 | <a href="#">ENSMUST00000066324</a> | <a href="#">432988</a> | predicted gene, EG432988                                 | <a href="#">EG432988</a>      | 0.957 | -0.646 | 0.538204 | 0.771145 |
| 12301 | 10526772 | <a href="#">NM_178612</a>          | <a href="#">66455</a>  | canopy 4 homolog (zebrafish)                             | <a href="#">Cnpy4</a>         | 0.957 | -0.982 | 0.357862 | 0.630237 |
| 12302 | 10524450 | <a href="#">NM_001040691</a>       | <a href="#">22256</a>  | uracil DNA glycosylase                                   | <a href="#">Ung</a>           | 0.956 | -0.528 | 0.613443 | 0.820926 |

|       |          |                                    |                           |                                |                                    |       |        |          |          |
|-------|----------|------------------------------------|---------------------------|--------------------------------|------------------------------------|-------|--------|----------|----------|
| 12303 | 10390574 | <a href="#">NM_028149</a>          | <a href="#">72194</a>     | F-box and leucine-rich repeat  | <a href="#">Fbx120</a>             | 0.956 | -0.731 | 0.487864 | 0.735554 |
| 12304 | 10515201 | <a href="#">NM_007823</a>          | <a href="#">13120</a>     | cytochrome P450, family 4, sub | <a href="#">Cyp4b1</a>             | 0.956 | -0.435 | 0.676226 | 0.855911 |
| 12305 | 10491081 |                                    |                           |                                |                                    | 0.956 | -0.849 | 0.423381 | 0.685554 |
| 12306 | 10447848 | <a href="#">NM_008552</a>          | <a href="#">17171</a>     | MAS1 oncogene                  | <a href="#">Mas1</a>               | 0.956 | -0.311 | 0.764243 | 0.90173  |
| 12307 | 10364379 |                                    |                           |                                |                                    | 0.956 | -0.456 | 0.661801 | 0.8494   |
| 12308 | 10528519 | <a href="#">AK030236</a>           | <a href="#">330053</a>    | RIKEN cDNA 4933427G23 gene     | <a href="#">4933427G23Rik</a>      | 0.956 | -0.891 | 0.401865 | 0.667094 |
| 12309 | 10414817 | <a href="#">U07662</a>             | <a href="#">21473</a>     | T-cell receptor alpha chain    | <a href="#">Tera</a>               | 0.956 | -0.883 | 0.405946 | 0.670467 |
| 12310 | 10537823 | <a href="#">NM_146652</a>          | <a href="#">18310</a>     | olfactory receptor 13          | <a href="#">Olfr13</a>             | 0.956 | -1.193 | 0.270542 | 0.545253 |
| 12311 | 10456836 | <a href="#">NM_153124</a>          | <a href="#">225742</a>    | ST8 alpha-N-acetyl-neuraminide | <a href="#">St8sia5</a>            | 0.956 | -0.477 | 0.647741 | 0.841423 |
| 12312 | 10525885 | <a href="#">ENSMUST00000100700</a> | <a href="#">639281</a>    | predicted gene, EG639281       | <a href="#">EG639281</a>           | 0.956 | -0.523 | 0.616459 | 0.82288  |
| 12313 | 10551981 | <a href="#">NM_145580</a>          | <a href="#">101883</a>    | transmembrane protein 149      | <a href="#">Tmem149</a>            | 0.956 | -0.912 | 0.391232 | 0.659561 |
| 12314 | 10550322 | <a href="#">NM_011927</a>          | <a href="#">26368</a>     | CEA-related cell adhesion mole | <a href="#">Ceacam9</a>            | 0.956 | -0.649 | 0.536604 | 0.76974  |
| 12315 | 10601549 |                                    |                           |                                |                                    | 0.956 | -0.539 | 0.606316 | 0.816556 |
| 12316 | 10373016 |                                    |                           |                                |                                    | 0.956 | -0.281 | 0.786305 | 0.912868 |
| 12317 | 10497086 | <a href="#">ENSMUST00000029827</a> | <a href="#">69042</a>     | RIKEN cDNA 1810013D15 gene     | <a href="#">1810013D15Rik</a>      | 0.956 | -0.674 | 0.521117 | 0.758676 |
| 12318 | 10493690 | <a href="#">ENSMUST00000029548</a> | <a href="#">77595</a>     | nucleoporin 210-like           | <a href="#">Nup210l</a>            | 0.956 | 0.107  | 0.917835 | 0.967712 |
| 12319 | 10442807 | <a href="#">NM_027951</a>          | <a href="#">71840</a>     | tektin 4                       | <a href="#">Tekt4</a>              | 0.956 | -1.078 | 0.315788 | 0.592722 |
| 12320 | 10460344 | <a href="#">NM_001078649</a>       | <a href="#">66990</a>     | transmembrane protein 134      | <a href="#">Tmem134</a>            | 0.956 | -1.122 | 0.297931 | 0.57393  |
| 12321 | 10443946 | <a href="#">NM_183282</a>          | <a href="#">69481</a>     | RIKEN cDNA 1700029I08 gene     | <a href="#">1700029I08Rik</a>      | 0.956 | -0.139 | 0.893134 | 0.957774 |
| 12322 | 10577093 | <a href="#">ENSMUST00000098932</a> | <a href="#">100038554</a> | predicted gene, OTTMUSG0000002 | <a href="#">OTTMUSG00000020606</a> | 0.956 | -0.145 | 0.888649 | 0.956116 |
| 12323 | 10502732 | <a href="#">NM_011100</a>          | <a href="#">18749</a>     | protein kinase, cAMP dependent | <a href="#">Prkacb</a>             | 0.956 | -0.709 | 0.500593 | 0.743662 |
| 12324 | 10357418 | <a href="#">NM_001081078</a>       | <a href="#">226413</a>    | lactase                        | <a href="#">Lct</a>                | 0.956 | -0.413 | 0.691839 | 0.864682 |
| 12325 | 10413434 | <a href="#">NM_001114879</a>       | <a href="#">218850</a>    | DNA segment, Chr 14, Abbott 1  | <a href="#">D14Abb1e</a>           | 0.956 | -0.86  | 0.417357 | 0.680204 |
| 12326 | 10587633 | <a href="#">ENSMUST00000113149</a> | <a href="#">244958</a>    | similar to Chromosome 6 open r | <a href="#">LOC244958</a>          | 0.956 | -0.461 | 0.658154 | 0.847091 |
| 12327 | 10411751 | <a href="#">NM_022885</a>          | <a href="#">69048</a>     | solute carrier family 30 (zinc | <a href="#">Slc30a5</a>            | 0.956 | -1.145 | 0.288725 | 0.564814 |
| 12328 | 10577492 | <a href="#">NM_011848</a>          | <a href="#">23954</a>     | NIMA (never in mitosis gene a) | <a href="#">Nek3</a>               | 0.956 | -1.18  | 0.275554 | 0.550454 |
| 12329 | 10390841 | <a href="#">NM_010661</a>          | <a href="#">268482</a>    | keratin 12                     | <a href="#">Krt12</a>              | 0.956 | -0.467 | 0.654304 | 0.845158 |
| 12330 | 10545697 | <a href="#">NM_013764</a>          | <a href="#">27369</a>     | deoxyguanosine kinase          | <a href="#">Dguok</a>              | 0.956 | -1.029 | 0.336802 | 0.612536 |
| 12331 | 10542060 |                                    |                           |                                |                                    | 0.956 | -0.5   | 0.631874 | 0.832719 |
| 12332 | 10481621 | <a href="#">BC024615</a>           | <a href="#">73737</a>     | RIKEN cDNA 1110008P14 gene     | <a href="#">1110008P14Rik</a>      | 0.956 | -1.129 | 0.29497  | 0.571244 |
| 12333 | 10499273 | <a href="#">BC023814</a>           | <a href="#">229503</a>    | cDNA sequence BC023814         | <a href="#">BC023814</a>           | 0.956 | -0.887 | 0.403581 | 0.668494 |
| 12334 | 10425024 | <a href="#">BC038324</a>           | <a href="#">117171</a>    | RIKEN cDNA 1110038F14 gene     | <a href="#">1110038F14Rik</a>      | 0.956 | -0.91  | 0.392139 | 0.660248 |
| 12335 | 10448168 | <a href="#">ENSMUST00000071189</a> | <a href="#">14290</a>     | formyl peptide receptor, relat | <a href="#">Fpr-rs3</a>            | 0.956 | -0.647 | 0.537805 | 0.770834 |
| 12336 | 10486292 | <a href="#">NM_177294</a>          | <a href="#">68925</a>     | RNA polymerase II associated p | <a href="#">Rpap1</a>              | 0.956 | -0.631 | 0.547814 | 0.778543 |
| 12337 | 10479996 | <a href="#">NM_020615</a>          | <a href="#">11949</a>     | ATP synthase, H+ transporting, | <a href="#">Atp5c1</a>             | 0.956 | -1.055 | 0.325484 | 0.60184  |
| 12338 | 10519477 |                                    |                           |                                |                                    | 0.956 | -0.886 | 0.404005 | 0.668777 |
| 12339 | 10497399 | <a href="#">NM_001122759</a>       | <a href="#">18583</a>     | phosphodiesterase 7A           | <a href="#">Pde7a</a>              | 0.956 | -1.14  | 0.290734 | 0.567035 |
| 12340 | 10434717 |                                    |                           |                                |                                    | 0.956 | -0.292 | 0.778641 | 0.909988 |
| 12341 | 10574825 | <a href="#">NM_001033320</a>       | <a href="#">234695</a>    | RGD motif, leucine rich repeat | <a href="#">Rltpr</a>              | 0.956 | -0.536 | 0.608143 | 0.817507 |
| 12342 | 10462796 | <a href="#">NM_010615</a>          | <a href="#">16551</a>     | kinesin family member 11       | <a href="#">Kif11</a>              | 0.956 | -1.282 | 0.239431 | 0.51235  |
| 12343 | 10388308 | <a href="#">NM_146709</a>          | <a href="#">258704</a>    | olfactory receptor 411         | <a href="#">Olfr411</a>            | 0.956 | -0.391 | 0.707209 | 0.872175 |
| 12344 | 10560089 |                                    |                           |                                |                                    | 0.956 | -0.061 | 0.952942 | 0.981873 |
| 12345 | 10411353 | <a href="#">NM_025585</a>          | <a href="#">66479</a>     | RIKEN cDNA 1700029F12 gene     | <a href="#">1700029F12Rik</a>      | 0.956 | -0.434 | 0.67677  | 0.856344 |
| 12346 | 10562166 | <a href="#">NM_183257</a>          | <a href="#">66438</a>     | hepcidin antimicrobial peptide | <a href="#">Hamp2</a>              | 0.956 | 0.014  | 0.989306 | 0.995355 |
| 12347 | 10438621 | <a href="#">NM_009186</a>          | <a href="#">20462</a>     | splicing factor, arginine/seri | <a href="#">Sfrs10</a>             | 0.956 | -1.25  | 0.250438 | 0.524406 |
| 12348 | 10549886 | <a href="#">AF365933</a>           | <a href="#">116812</a>    | zinc finger protein 264        | <a href="#">Zfp264</a>             | 0.956 | -0.718 | 0.495607 | 0.740468 |
| 12349 | 10551120 | <a href="#">ENSMUST00000085962</a> | <a href="#">269878</a>    | multiple EGF-like-domains 8    | <a href="#">Megf8</a>              | 0.956 | -0.542 | 0.604164 | 0.815116 |
| 12350 | 10445729 | <a href="#">NM_011549</a>          | <a href="#">21425</a>     | transcription factor EB        | <a href="#">Tcfef</a>              | 0.956 | -0.935 | 0.380035 | 0.6497   |
| 12351 | 10510447 | <a href="#">BC035954</a>           | <a href="#">69743</a>     | castor homolog 1, zinc finger  | <a href="#">Casz1</a>              | 0.956 | -0.784 | 0.457917 | 0.713313 |
| 12352 | 10547575 | <a href="#">NM_001033354</a>       | <a href="#">243621</a>    | IQ motif and Sec7 domain 3     | <a href="#">Iqsec3</a>             | 0.956 | -0.404 | 0.698105 | 0.867716 |
| 12353 | 10508420 | <a href="#">NM_134151</a>          | <a href="#">107271</a>    | tyrosyl-tRNA synthetase        | <a href="#">Yars</a>               | 0.956 | -1.019 | 0.341365 | 0.616096 |
| 12354 | 10364903 | <a href="#">NM_007445</a>          | <a href="#">11705</a>     | anti-Mullerian hormone         | <a href="#">Amh</a>                | 0.956 | -0.38  | 0.714799 | 0.875142 |
| 12355 | 10365450 | <a href="#">NM_133993</a>          | <a href="#">103136</a>    | PWP1 homolog (S. cerevisiae)   | <a href="#">Pwp1</a>               | 0.956 | -0.71  | 0.499758 | 0.742891 |
| 12356 | 10558614 | <a href="#">NM_172909</a>          | <a href="#">244233</a>    | CD163 molecule-like 1          | <a href="#">Cd163l1</a>            | 0.956 | -0.673 | 0.521644 | 0.75888  |
| 12357 | 10511000 | <a href="#">NM_000000000</a>       | <a href="#">000000</a>    | RIKEN cDNA 5830433M19          | <a href="#">5830433M19Rik</a>      | 0.956 | -1.115 | 0.300000 | 0.550000 |

|       |          |                                    |                           |                                   |                                    |       |        |          |          |
|-------|----------|------------------------------------|---------------------------|-----------------------------------|------------------------------------|-------|--------|----------|----------|
| 12357 | 10514398 | <a href="#">BCU2006/</a>           | <a href="#">677/0</a>     | gene                              | <a href="#">D830433M19Rik</a>      | 0.956 | -1.145 | 0.28896/ | 0.565029 |
| 12358 | 10462359 | <a href="#">ENSMUST00000064449</a> | <a href="#">791409</a>    | predicted gene, ENSMUSG0000005    | <a href="#">ENSMUSG00000052521</a> | 0.956 | -0.701 | 0.505553 | 0.747576 |
| 12359 | 10590096 | <a href="#">ENSMUST00000055775</a> | <a href="#">320256</a>    | deleted in lung and esophageal    | <a href="#">Dlec1</a>              | 0.956 | -1.11  | 0.302562 | 0.578687 |
| 12360 | 10582551 | <a href="#">NM_028146</a>          | <a href="#">72185</a>     | dysbindin (dystrobrebin bindin    | <a href="#">Dbndd1</a>             | 0.956 | -0.892 | 0.401227 | 0.666736 |
| 12361 | 10351801 | <a href="#">NM_033608</a>          | <a href="#">93842</a>     | immunoglobulin superfamily, me    | <a href="#">Igsf9</a>              | 0.956 | -0.637 | 0.543652 | 0.775859 |
| 12362 | 10583535 | <a href="#">NM_008319</a>          | <a href="#">15898</a>     | intercellular adhesion molecul    | <a href="#">Icam5</a>              | 0.956 | -0.44  | 0.672833 | 0.854651 |
| 12363 | 10349793 | <a href="#">NM_172516</a>          | <a href="#">213452</a>    | receptor interacting protein k    | <a href="#">Ripk5</a>              | 0.956 | -0.551 | 0.598405 | 0.811434 |
| 12364 | 10369479 | <a href="#">ENSMUST00000051330</a> | <a href="#">320949</a>    | RIKEN cDNA D830039M14 gene        | <a href="#">D830039M14Rik</a>      | 0.956 | -0.512 | 0.624185 | 0.828379 |
| 12365 | 10599976 | <a href="#">NM_019926</a>          | <a href="#">17772</a>     | X-linked myotubular myopathy g    | <a href="#">Mtm1</a>               | 0.956 | -0.605 | 0.56344  | 0.790064 |
| 12366 | 10542557 | <a href="#">NM_001005605</a>       | <a href="#">11569</a>     | AE binding protein 2              | <a href="#">Aebp2</a>              | 0.956 | -0.716 | 0.496382 | 0.740946 |
| 12367 | 10508149 | <a href="#">AK146848</a>           | <a href="#">100048926</a> | predicted gene, OTTMUSG0000000    | <a href="#">OTTMUSG00000009351</a> | 0.956 | -0.907 | 0.39368  | 0.661649 |
| 12368 | 10584520 | <a href="#">NM_147105</a>          | <a href="#">259109</a>    | olfactory receptor 978            | <a href="#">Olfr978</a>            | 0.956 | -1     | 0.349697 | 0.623229 |
| 12369 | 10388031 |                                    |                           |                                   |                                    | 0.955 | -0.284 | 0.784416 | 0.912103 |
| 12370 | 10582209 | <a href="#">NM_172761</a>          | <a href="#">234814</a>    | methenyltetrahydrofolate synth    | <a href="#">Mthfsd</a>             | 0.955 | -0.793 | 0.452995 | 0.709661 |
| 12371 | 10380248 | <a href="#">NR_003564</a>          | <a href="#">217066</a>    | predicted gene, OTTMUSG0000000    | <a href="#">OTTMUSG00000001305</a> | 0.955 | -1.216 | 0.262213 | 0.53666  |
| 12372 | 10585276 | <a href="#">NM_011136</a>          | <a href="#">18985</a>     | POU domain, class 2, associati    | <a href="#">Pou2af1</a>            | 0.955 | -0.556 | 0.59504  | 0.809153 |
| 12373 | 10360130 | <a href="#">NM_012049</a>          | <a href="#">27045</a>     | nitrilase 1                       | <a href="#">Ntl1</a>               | 0.955 | -1.281 | 0.239796 | 0.512804 |
| 12374 | 10596394 | <a href="#">NM_172927</a>          | <a href="#">245026</a>    | RIKEN cDNA E330026B02 gene        | <a href="#">E330026B02Rik</a>      | 0.955 | -0.826 | 0.435052 | 0.695306 |
| 12375 | 10447415 | <a href="#">XR_034864</a>          | <a href="#">668863</a>    | similar to ribosomal protein      | <a href="#">LOC668863</a>          | 0.955 | -0.623 | 0.552455 | 0.782182 |
| 12376 | 10576354 | <a href="#">NM_054070</a>          | <a href="#">114896</a>    | AFG3(ATPase family gene 3)-lik    | <a href="#">Afg3l1</a>             | 0.955 | -1.185 | 0.273613 | 0.548314 |
| 12377 | 10562397 |                                    |                           |                                   |                                    | 0.955 | -0.689 | 0.512221 | 0.752738 |
| 12378 | 10482133 | <a href="#">NM_146368</a>          | <a href="#">258365</a>    | olfactory receptor 361            | <a href="#">Olfr361</a>            | 0.955 | -0.887 | 0.403896 | 0.668753 |
| 12379 | 10560097 | <a href="#">NM_177312</a>          | <a href="#">321008</a>    | RIKEN cDNA 6330408A02 gene        | <a href="#">6330408A02Rik</a>      | 0.955 | -0.387 | 0.71026  | 0.873031 |
| 12380 | 10496192 | <a href="#">NM_021382</a>          | <a href="#">21338</a>     | tachykinin receptor 3             | <a href="#">Tacr3</a>              | 0.955 | -0.646 | 0.538308 | 0.771226 |
| 12381 | 10528482 | <a href="#">ENSMUST00000101522</a> | <a href="#">269630</a>    | cDNA sequence BC050254            | <a href="#">BC050254</a>           | 0.955 | -0.993 | 0.35278  | 0.625874 |
| 12382 | 10604344 |                                    |                           |                                   |                                    | 0.955 | -0.746 | 0.479139 | 0.729179 |
| 12383 | 10537809 | <a href="#">NM_146656</a>          | <a href="#">258650</a>    | olfactory receptor 444            | <a href="#">Olfr444</a>            | 0.955 | -0.106 | 0.918448 | 0.967805 |
| 12384 | 10561831 | <a href="#">NM_152814</a>          | <a href="#">72556</a>     | zinc finger protein 566           | <a href="#">Zfp566</a>             | 0.955 | -0.778 | 0.461157 | 0.715789 |
| 12385 | 10534551 | <a href="#">NM_027891</a>          | <a href="#">71735</a>     | leucine-rich repeats and WD re    | <a href="#">Lrwd1</a>              | 0.955 | -0.663 | 0.527851 | 0.763369 |
| 12386 | 10499095 | <a href="#">NM_172682</a>          | <a href="#">229488</a>    | RIKEN cDNA 9930021J17 gene        | <a href="#">9930021J17Rik</a>      | 0.955 | -0.608 | 0.561907 | 0.788974 |
| 12387 | 10395702 | <a href="#">NM_198111</a>          | <a href="#">238161</a>    | A kinase (PRKA) anchor protein    | <a href="#">Akap6</a>              | 0.955 | -0.234 | 0.821464 | 0.92863  |
| 12388 | 10419566 | <a href="#">NM_007449</a>          | <a href="#">11731</a>     | angiogenin, ribonuclease A fam    | <a href="#">Ang2</a>               | 0.955 | -1.309 | 0.230702 | 0.501597 |
| 12389 | 10425559 | <a href="#">NM_145993</a>          | <a href="#">214669</a>    | l(3)mbt-like 2 (Drosophila)       | <a href="#">L3mbtl2</a>            | 0.955 | -1.017 | 0.341911 | 0.616342 |
| 12390 | 10416279 | <a href="#">NM_145219</a>          | <a href="#">213469</a>    | leucine-rich repeat LGI family    | <a href="#">Lgi3</a>               | 0.955 | -0.22  | 0.832248 | 0.932679 |
| 12391 | 10385343 | <a href="#">NM_133795</a>          | <a href="#">66827</a>     | tetratricopeptide repeat domai    | <a href="#">Ttc1</a>               | 0.955 | -1.183 | 0.274501 | 0.54916  |
| 12392 | 10582882 |                                    |                           |                                   |                                    | 0.955 | -0.024 | 0.981317 | 0.992092 |
| 12393 | 10523672 |                                    |                           |                                   |                                    | 0.955 | -0.469 | 0.653172 | 0.844576 |
| 12394 | 10596117 | <a href="#">AK137058</a>           | <a href="#">28135</a>     | centrosomal protein 63            | <a href="#">Cep63</a>              | 0.955 | -0.362 | 0.727984 | 0.882032 |
| 12395 | 10607886 | <a href="#">XM_891970</a>          | <a href="#">627311</a>    | predicted gene, EG627311          | <a href="#">EG627311</a>           | 0.955 | -0.114 | 0.91235  | 0.965068 |
| 12396 | 10559788 | <a href="#">NM_207136</a>          | <a href="#">269862</a>    | olfactory receptor 1349           | <a href="#">Olfr1349</a>           | 0.955 | -0.167 | 0.87172  | 0.948716 |
| 12397 | 10596257 |                                    |                           |                                   |                                    | 0.955 | -0.696 | 0.508523 | 0.75032  |
| 12398 | 10435112 | <a href="#">NM_080457</a>          | <a href="#">140474</a>    | mucin 4                           | <a href="#">Muc4</a>               | 0.955 | -0.311 | 0.764454 | 0.901786 |
| 12399 | 10425082 | <a href="#">NM_001081367</a>       | <a href="#">72844</a>     | potassium channel tetramerisat    | <a href="#">Kctd17</a>             | 0.955 | -0.51  | 0.625108 | 0.829015 |
| 12400 | 10380840 | <a href="#">NM_001109626</a>       | <a href="#">69131</a>     | Cdc2-related kinase, arginine/    | <a href="#">Crkrs</a>              | 0.955 | -1.059 | 0.323638 | 0.600158 |
| 12401 | 10548141 | <a href="#">ENSMUST00000071101</a> | <a href="#">434089</a>    | predicted gene, ENSMUSG0000005    | <a href="#">ENSMUSG00000056771</a> | 0.955 | -0.526 | 0.614903 | 0.82184  |
| 12402 | 10443319 | <a href="#">NM_027185</a>          | <a href="#">23853</a>     | differentially expressed in FD    | <a href="#">Def6</a>               | 0.955 | -0.615 | 0.557314 | 0.785582 |
| 12403 | 10436976 |                                    |                           |                                   |                                    | 0.955 | -0.38  | 0.714932 | 0.875237 |
| 12404 | 10355844 | <a href="#">NM_001110831</a>       | <a href="#">13437</a>     | aspartyl aminopeptidase           | <a href="#">Dnpep</a>              | 0.955 | -1.06  | 0.323278 | 0.599849 |
| 12405 | 10445753 | <a href="#">NM_021407</a>          | <a href="#">58218</a>     | triggering receptor expressed     | <a href="#">Trem3</a>              | 0.955 | -0.547 | 0.601092 | 0.812694 |
| 12406 | 10589632 | <a href="#">NM_153172</a>          | <a href="#">260408</a>    | cDNA sequence BC107230            | <a href="#">BC107230</a>           | 0.955 | -0.422 | 0.685175 | 0.860862 |
| 12407 | 10452724 | <a href="#">NM_007420</a>          | <a href="#">11682</a>     | proliferating cell nuclear kinase | <a href="#">Pkin</a>               | 0.955 | -0.27  | 0.721872 | 0.870017 |

|       |          |                                    |                           |                                |                                    |       |        |          |          |
|-------|----------|------------------------------------|---------------------------|--------------------------------|------------------------------------|-------|--------|----------|----------|
| 12407 | 10452754 | <a href="#">NM_007432</a>          | <a href="#">11062</a>     | anaplastic lymphoma kinase     | <a href="#">Alk</a>                | 0.955 | -0.57  | 0.721872 | 0.879017 |
| 12408 | 10382538 | <a href="#">NM_177778</a>          | <a href="#">276905</a>    | armadillo repeat containing 7  | <a href="#">Armc7</a>              | 0.955 | -1.135 | 0.29264  | 0.568731 |
| 12409 | 10462113 | <a href="#">NM_177034</a>          | <a href="#">319924</a>    | amyloid beta (A4) precursor pr | <a href="#">Apoa1</a>              | 0.955 | -0.621 | 0.553743 | 0.783219 |
| 12410 | 10605612 | <a href="#">XM_992998</a>          | <a href="#">837027</a>    | predicted gene, EG637027       | <a href="#">EG637027</a>           | 0.955 | -1.025 | 0.338573 | 0.614159 |
| 12411 | 10451054 | <a href="#">NM_199016</a>          | <a href="#">224794</a>    | ectonucleotide pyrophosphatase | <a href="#">Enpp4</a>              | 0.955 | -0.905 | 0.394608 | 0.66219  |
| 12412 | 10469433 |                                    |                           |                                |                                    | 0.955 | 0.076  | 0.941582 | 0.977455 |
| 12413 | 10367335 |                                    |                           |                                |                                    | 0.955 | -0.239 | 0.817406 | 0.927212 |
| 12414 | 10543835 | <a href="#">NM_025336</a>          | <a href="#">66075</a>     | coiled-coil-helix-coiled-coil- | <a href="#">Chchd3</a>             | 0.955 | -1.46  | 0.186369 | 0.444561 |
| 12415 | 10349208 | <a href="#">NM_001077425</a>       | <a href="#">636808</a>    | contactin associated protein-1 | <a href="#">Cntnap5a</a>           | 0.955 | -0.223 | 0.829692 | 0.931455 |
| 12416 | 10533812 | <a href="#">NM_001081203</a>       | <a href="#">243272</a>    | sno, strawberry notch homolog  | <a href="#">Sbno1</a>              | 0.955 | -1.211 | 0.263909 | 0.538844 |
| 12417 | 10534426 | <a href="#">NM_010246</a>          | <a href="#">14371</a>     | frizzled homolog 9 (Drosophila | <a href="#">Fzd9</a>               | 0.955 | -0.184 | 0.859408 | 0.943573 |
| 12418 | 10413125 | <a href="#">NM_026283</a>          | <a href="#">67630</a>     | sterile alpha motif domain con | <a href="#">Samd8</a>              | 0.955 | -0.825 | 0.435643 | 0.695606 |
| 12419 | 10530731 |                                    |                           |                                |                                    | 0.955 | -0.931 | 0.381925 | 0.651558 |
| 12420 | 10540991 | <a href="#">AK164314</a>           | <a href="#">212541</a>    | rhodopsin                      | <a href="#">Rho</a>                | 0.955 | -0.534 | 0.609488 | 0.818311 |
| 12421 | 10451953 | <a href="#">NM_029796</a>          | <a href="#">76905</a>     | leucine-rich alpha-2-glycoprot | <a href="#">Lrg1</a>               | 0.955 | -0.37  | 0.72229  | 0.879223 |
| 12422 | 10579114 | <a href="#">ENSMUST00000059500</a> | <a href="#">234365</a>    | cDNA sequence BC028663         | <a href="#">BC028663</a>           | 0.955 | -1.053 | 0.326477 | 0.602834 |
| 12423 | 10591350 | <a href="#">NM_145154</a>          | <a href="#">70726</a>     | angiopoietin-like 6            | <a href="#">Angptl6</a>            | 0.955 | -0.901 | 0.3969   | 0.664139 |
| 12424 | 10496919 | <a href="#">NM_133247</a>          | <a href="#">170822</a>    | ubiquitin specific peptidase 3 | <a href="#">Usp33</a>              | 0.955 | -1.29  | 0.236838 | 0.508973 |
| 12425 | 10409539 |                                    |                           |                                |                                    | 0.955 | -0.281 | 0.786439 | 0.912899 |
| 12426 | 10418455 | <a href="#">NM_008406</a>          | <a href="#">16424</a>     | inter-alpha trypsin inhibitor, | <a href="#">Itih1</a>              | 0.955 | -0.739 | 0.483457 | 0.732251 |
| 12427 | 10452085 | <a href="#">ENSMUST00000052092</a> | <a href="#">224902</a>    | scaffold attachment factor B2  | <a href="#">Safb2</a>              | 0.955 | -0.702 | 0.504925 | 0.747039 |
| 12428 | 10493565 | <a href="#">NM_001038587</a>       | <a href="#">56417</a>     | adenosine deaminase, RNA-speci | <a href="#">Adar</a>               | 0.955 | -0.554 | 0.596184 | 0.809771 |
| 12429 | 10382692 | <a href="#">BC065414</a>           | <a href="#">66528</a>     | RIKEN cDNA 2210020M01 gene     | <a href="#">2210020M01Rik</a>      | 0.955 | -0.413 | 0.691788 | 0.864682 |
| 12430 | 10468249 | <a href="#">ENSMUST00000086963</a> | <a href="#">100049552</a> | predicted gene, ENSMUSG0000006 | <a href="#">ENSMUSG00000067124</a> | 0.955 | -0.71  | 0.500105 | 0.743152 |
| 12431 | 10477169 | <a href="#">NM_010495</a>          | <a href="#">15901</a>     | inhibitor of DNA binding 1     | <a href="#">Id1</a>                | 0.955 | -1.355 | 0.216438 | 0.483657 |
| 12432 | 10493292 | <a href="#">ENSMUST00000029696</a> | <a href="#">74200</a>     | RIKEN cDNA 2810403A07 gene     | <a href="#">2810403A07Rik</a>      | 0.955 | -0.993 | 0.353011 | 0.625939 |
| 12433 | 10555887 | <a href="#">NM_146748</a>          | <a href="#">258743</a>    | olfactory receptor 661         | <a href="#">Olfr661</a>            | 0.955 | -0.239 | 0.817405 | 0.927212 |
| 12434 | 10407814 | <a href="#">NM_178337</a>          | <a href="#">70430</a>     | tubulin-specific chaperone e   | <a href="#">Tbce</a>               | 0.955 | -1.126 | 0.296323 | 0.572868 |
| 12435 | 10539905 | <a href="#">AK133241</a>           | <a href="#">100038356</a> | predicted gene, ENSMUSG0000007 | <a href="#">ENSMUSG00000072920</a> | 0.955 | -0.484 | 0.642431 | 0.838098 |
| 12436 | 10580282 | <a href="#">NM_008416</a>          | <a href="#">16477</a>     | Jun-B oncogene                 | <a href="#">Junb</a>               | 0.955 | -0.979 | 0.359378 | 0.631436 |
| 12437 | 10420030 | <a href="#">NM_011190</a>          | <a href="#">19188</a>     | proteasome (prosome, macropain | <a href="#">Psme2</a>              | 0.955 | -1.312 | 0.229655 | 0.500806 |
| 12438 | 10460102 | <a href="#">BC034297</a>           | <a href="#">67105</a>     | RIKEN cDNA 1700034H14 gene     | <a href="#">1700034H14Rik</a>      | 0.955 | -0.835 | 0.430704 | 0.691411 |
| 12439 | 10485466 | <a href="#">NM_009804</a>          | <a href="#">12359</a>     | catalase                       | <a href="#">Cat</a>                | 0.955 | -1.082 | 0.314208 | 0.591017 |
| 12440 | 10523577 | <a href="#">XM_984344</a>          | <a href="#">666515</a>    | predicted gene, EG666515       | <a href="#">EG666515</a>           | 0.955 | -0.611 | 0.560211 | 0.787521 |
| 12441 | 10477286 | <a href="#">NM_080463</a>          | <a href="#">140484</a>    | protein O-fucosyltransferase 1 | <a href="#">Pofut1</a>             | 0.955 | -0.582 | 0.578438 | 0.798316 |
| 12442 | 10421875 |                                    |                           |                                |                                    | 0.955 | -0.575 | 0.582603 | 0.800924 |
| 12443 | 10355227 | <a href="#">NM_001122738</a>       | <a href="#">68691</a>     | RIKEN cDNA 1110028C15 gene     | <a href="#">1110028C15Rik</a>      | 0.955 | -1.227 | 0.258514 | 0.532776 |
| 12444 | 10356508 |                                    |                           |                                |                                    | 0.955 | -0.272 | 0.793266 | 0.915797 |
| 12445 | 10518546 | <a href="#">NM_019781</a>          | <a href="#">56273</a>     | peroxisomal biogenesis factor  | <a href="#">Pex14</a>              | 0.955 | -0.763 | 0.469795 | 0.721848 |
| 12446 | 10590365 | <a href="#">NM_011703</a>          | <a href="#">22354</a>     | vasoactive intestinal peptide  | <a href="#">Vipr1</a>              | 0.954 | -1.167 | 0.280297 | 0.555618 |
| 12447 | 10585517 | <a href="#">BC068128</a>           | <a href="#">244886</a>    | expressed sequence AI118078    | <a href="#">AI118078</a>           | 0.954 | -0.042 | 0.967892 | 0.987137 |
| 12448 | 10600453 | <a href="#">NM_178590</a>          | <a href="#">16151</a>     | inhibitor of kappaB kinase gam | <a href="#">Ikbkg</a>              | 0.954 | -0.734 | 0.486053 | 0.734026 |
| 12449 | 10575328 | <a href="#">NM_001122594</a>       | <a href="#">244650</a>    | PH domain and leucine rich rep | <a href="#">Phlpl1</a>             | 0.954 | -0.786 | 0.457181 | 0.712928 |
| 12450 | 10555550 | <a href="#">NM_009191</a>          | <a href="#">20480</a>     | ClpB caseinolytic peptidase B  | <a href="#">Clpb</a>               | 0.954 | -1.516 | 0.172147 | 0.424279 |
| 12451 | 10504613 | <a href="#">ENSMUST00000043958</a> | <a href="#">381522</a>    | RIKEN cDNA E230008N13 gene     | <a href="#">E230008N13Rik</a>      | 0.954 | -0.587 | 0.575391 | 0.797076 |
| 12452 | 10539584 | <a href="#">NM_010131</a>          | <a href="#">13796</a>     | empty spiracles homolog 1 (Dro | <a href="#">Emx1</a>               | 0.954 | -0.554 | 0.596063 | 0.80968  |
| 12453 | 10400504 | <a href="#">NM_008259</a>          | <a href="#">15375</a>     | forkhead box A1                | <a href="#">Foxa1</a>              | 0.954 | -0.313 | 0.763216 | 0.901493 |
| 12454 | 10360972 | <a href="#">NM_010607</a>          | <a href="#">16526</a>     | potassium channel, subfamily K | <a href="#">Kcnk2</a>              | 0.954 | -1.018 | 0.34157  | 0.616178 |
| 12455 | 10515159 | <a href="#">NM_008593</a>          | <a href="#">17301</a>     | forkhead box D2                | <a href="#">Foxd2</a>              | 0.954 | -0.303 | 0.770249 | 0.905037 |
| 12456 | 10596190 | <a href="#">NM_001002896</a>       | <a href="#">107993</a>    | beaded filament structural pro | <a href="#">Bfsp2</a>              | 0.954 | -0.415 | 0.689975 | 0.86396  |
| 12457 | 10371415 |                                    |                           |                                |                                    | 0.954 | -1.136 | 0.292109 | 0.568202 |

|       |          |                                    |                           |                                |                                    |       |        |          |          |
|-------|----------|------------------------------------|---------------------------|--------------------------------|------------------------------------|-------|--------|----------|----------|
| 12458 | 10539080 | <a href="#">NM_011375</a>          | <a href="#">20454</a>     | ST3 beta-galactoside alpha-2,3 | <a href="#">St3gal5</a>            | 0.954 | -0.778 | 0.461161 | 0.715789 |
| 12459 | 10373400 | <a href="#">NM_172259</a>          | <a href="#">216459</a>    | myosin, light polypeptide 6B   | <a href="#">My16b</a>              | 0.954 | -1.165 | 0.281238 | 0.556788 |
| 12460 | 10362861 | <a href="#">NM_172938</a>          | <a href="#">268297</a>    | sex comb on midleg-like 4 (Dro | <a href="#">Scml4</a>              | 0.954 | -0.19  | 0.85418  | 0.941009 |
| 12461 | 10585233 | <a href="#">NM_133981</a>          | <a href="#">102580</a>    | asparagine-linked glycosylatio | <a href="#">Alg9</a>               | 0.954 | -0.704 | 0.503547 | 0.746058 |
| 12462 | 10358675 |                                    |                           |                                |                                    | 0.954 | -0.76  | 0.471365 | 0.72321  |
| 12463 | 10382502 | <a href="#">NM_001080929</a>       | <a href="#">237988</a>    | cerebellar degeneration-relate | <a href="#">Cdr2l</a>              | 0.954 | -0.201 | 0.846035 | 0.937284 |
| 12464 | 10597323 | <a href="#">NM_033264</a>          | <a href="#">74100</a>     | cyclic AMP-regulated phosphopr | <a href="#">Arpp21</a>             | 0.954 | -0.434 | 0.677283 | 0.856571 |
| 12465 | 10363915 | <a href="#">AK138135</a>           | <a href="#">432471</a>    | hypothetical gene supported by | <a href="#">LOC432471</a>          | 0.954 | -0.451 | 0.665402 | 0.850877 |
| 12466 | 10517521 | <a href="#">NM_007939</a>          | <a href="#">13842</a>     | Eph receptor A8                | <a href="#">Epha8</a>              | 0.954 | -0.635 | 0.545292 | 0.777255 |
| 12467 | 10408121 | <a href="#">XR_032696</a>          | <a href="#">665690</a>    | similar to ribosomal protein L | <a href="#">LOC665690</a>          | 0.954 | -0.982 | 0.35776  | 0.630135 |
| 12468 | 10459512 | <a href="#">NM_016977</a>          | <a href="#">17202</a>     | melanocortin 4 receptor        | <a href="#">Mc4r</a>               | 0.954 | -0.575 | 0.582503 | 0.800913 |
| 12469 | 10535449 | <a href="#">NM_172726</a>          | <a href="#">231868</a>    | RIKEN cDNA E130309D02 gene     | <a href="#">E130309D02Rik</a>      | 0.954 | -1.188 | 0.272643 | 0.547117 |
| 12470 | 10375980 | <a href="#">NM_033565</a>          | <a href="#">93736</a>     | AF4/FMR2 family, member 4      | <a href="#">Aff4</a>               | 0.954 | -1.195 | 0.26974  | 0.544449 |
| 12471 | 10542840 | <a href="#">AK054296</a>           | <a href="#">402777</a>    | RIKEN cDNA E330012B07 gene     | <a href="#">E330012B07Rik</a>      | 0.954 | -0.297 | 0.775026 | 0.907674 |
| 12472 | 10399299 | <a href="#">BC145648</a>           | <a href="#">207921</a>    | RIKEN cDNA A830093I24 gene     | <a href="#">A830093I24Rik</a>      | 0.954 | -0.483 | 0.643481 | 0.838573 |
| 12473 | 10515452 | <a href="#">NM_001033774</a>       | <a href="#">381544</a>    | gene model 1661, (NCBI)        | <a href="#">Gm1661</a>             | 0.954 | -0.962 | 0.367091 | 0.638059 |
| 12474 | 10572741 | <a href="#">NM_207555</a>          | <a href="#">404315</a>    | olfactory receptor 372         | <a href="#">Olfr372</a>            | 0.954 | 0.326  | 0.753361 | 0.8961   |
| 12475 | 10512136 | <a href="#">NM_009736</a>          | <a href="#">12017</a>     | Bcl2-associated athanogene 1   | <a href="#">Bag1</a>               | 0.954 | -1.297 | 0.234433 | 0.50565  |
| 12476 | 10355474 | <a href="#">NM_001045533</a>       | <a href="#">381270</a>    | membrane-associated ring finge | <a href="#">March4</a>             | 0.954 | -0.964 | 0.366397 | 0.637411 |
| 12477 | 10359525 | <a href="#">NM_001081290</a>       | <a href="#">226562</a>    | BAT2 domain containing 1       | <a href="#">Bat2d</a>              | 0.954 | -1.408 | 0.200731 | 0.462663 |
| 12478 | 10402336 | <a href="#">NM_020494</a>          | <a href="#">27225</a>     | DEAD (Asp-Glu-Ala-Asp) box pol | <a href="#">Ddx24</a>              | 0.954 | -1.019 | 0.340994 | 0.615921 |
| 12479 | 10433472 | <a href="#">BC116778</a>           | <a href="#">69053</a>     | RIKEN cDNA 1810013L24 gene     | <a href="#">1810013L24Rik</a>      | 0.954 | -1.361 | 0.214597 | 0.481427 |
| 12480 | 10593664 | <a href="#">ENSMUST00000098759</a> | <a href="#">73567</a>     | RIKEN cDNA 1700104A03 gene     | <a href="#">1700104A03Rik</a>      | 0.954 | -0.135 | 0.896563 | 0.959489 |
| 12481 | 10490473 | <a href="#">NM_173031</a>          | <a href="#">271887</a>    | cDNA sequence BC066135         | <a href="#">BC066135</a>           | 0.954 | -0.571 | 0.585639 | 0.80308  |
| 12482 | 10468738 | <a href="#">BC049561</a>           | <a href="#">67507</a>     | RIKEN cDNA 1700019N19 gene     | <a href="#">1700019N19Rik</a>      | 0.954 | -0.125 | 0.904031 | 0.962759 |
| 12483 | 10438959 | <a href="#">NM_178069</a>          | <a href="#">224092</a>    | large subunit GTPase 1 homolog | <a href="#">Lsg1</a>               | 0.954 | -1.459 | 0.186677 | 0.444956 |
| 12484 | 10408212 | <a href="#">NM_015787</a>          | <a href="#">50709</a>     | histone cluster 1, H1e         | <a href="#">Hist1h1e</a>           | 0.954 | -1.018 | 0.341411 | 0.616096 |
| 12485 | 10589004 | <a href="#">NM_133794</a>          | <a href="#">97541</a>     | glutaminyl-tRNA synthetase     | <a href="#">Qars</a>               | 0.954 | -1.702 | 0.131262 | 0.363844 |
| 12486 | 10392791 | <a href="#">BC122876</a>           | <a href="#">72014</a>     | RIKEN cDNA 1500005I02 gene     | <a href="#">1500005I02Rik</a>      | 0.954 | -0.304 | 0.769379 | 0.904517 |
| 12487 | 10372926 |                                    |                           |                                |                                    | 0.954 | -0.533 | 0.60993  | 0.818557 |
| 12488 | 10410364 | <a href="#">ENSMUST00000087803</a> | <a href="#">319231</a>    | RIKEN cDNA 6720487G11 gene     | <a href="#">6720487G11Rik</a>      | 0.954 | -0.422 | 0.685631 | 0.861122 |
| 12489 | 10420280 | <a href="#">NM_010375</a>          | <a href="#">14944</a>     | granzyme G                     | <a href="#">Gzmg</a>               | 0.954 | -0.615 | 0.557457 | 0.785582 |
| 12490 | 10472499 |                                    |                           |                                |                                    | 0.954 | -0.685 | 0.51458  | 0.754736 |
| 12491 | 10425120 | <a href="#">NM_145929</a>          | <a href="#">106039</a>    | golgi associated, gamma adapti | <a href="#">Ggal</a>               | 0.954 | -0.905 | 0.394452 | 0.662113 |
| 12492 | 10527605 | <a href="#">BC055016</a>           | <a href="#">77521</a>     | RIKEN cDNA C130038G02 gene     | <a href="#">C130038G02Rik</a>      | 0.954 | -0.634 | 0.545638 | 0.777543 |
| 12493 | 10445867 | <a href="#">NM_013880</a>          | <a href="#">224860</a>    | phospholipase C-like 2         | <a href="#">Plcl2</a>              | 0.954 | -0.472 | 0.650553 | 0.843262 |
| 12494 | 10512431 | <a href="#">NM_020035</a>          | <a href="#">56703</a>     | phosphatidylinositol glycan an | <a href="#">Pigo</a>               | 0.954 | -0.847 | 0.424213 | 0.686411 |
| 12495 | 10507539 | <a href="#">NM_019422</a>          | <a href="#">54325</a>     | elongation of very long chain  | <a href="#">Elov1l</a>             | 0.954 | -0.886 | 0.40425  | 0.668868 |
| 12496 | 10349571 | <a href="#">NM_144960</a>          | <a href="#">64435</a>     | Fc receptor, IgA, IgM, high af | <a href="#">Fcamr</a>              | 0.954 | 0.158  | 0.878964 | 0.952091 |
| 12497 | 10552451 | <a href="#">NM_028236</a>          | <a href="#">72431</a>     | CEA-related cell adhesion mole | <a href="#">Ceacam18</a>           | 0.954 | -0.814 | 0.441952 | 0.700812 |
| 12498 | 10549794 | <a href="#">NR_003622</a>          | <a href="#">272350</a>    | predicted gene, EG272350       | <a href="#">EG272350</a>           | 0.954 | 0.135  | 0.896594 | 0.959489 |
| 12499 | 10386169 | <a href="#">ENSMUST00000065533</a> | <a href="#">100038519</a> | predicted gene, ENSMUSG0000005 | <a href="#">ENSMUSG00000053218</a> | 0.954 | -0.346 | 0.738886 | 0.888726 |
| 12500 | 10383556 | <a href="#">NM_181420</a>          | <a href="#">238024</a>    | cDNA sequence BC032265         | <a href="#">BC032265</a>           | 0.954 | -0.696 | 0.508088 | 0.749949 |
| 12501 | 10556297 | <a href="#">NM_009627</a>          | <a href="#">11535</a>     | adrenomedullin                 | <a href="#">Adm</a>                | 0.954 | -0.862 | 0.416341 | 0.67936  |
| 12502 | 10551971 | <a href="#">NM_170760</a>          | <a href="#">233073</a>    | U2 small nuclear RNA auxiliary | <a href="#">U2af114</a>            | 0.954 | -1.229 | 0.257488 | 0.531656 |
| 12503 | 10469250 |                                    |                           |                                |                                    | 0.954 | -0.795 | 0.451892 | 0.708709 |
| 12504 | 10532626 |                                    |                           |                                |                                    | 0.954 | -0.46  | 0.659209 | 0.848087 |
| 12505 | 10542104 | <a href="#">ENSMUST00000082030</a> | <a href="#">791299</a>    | predicted gene, ENSMUSG0000005 | <a href="#">ENSMUSG00000059659</a> | 0.954 | -0.399 | 0.701763 | 0.869198 |
| 12506 | 10500155 | <a href="#">ENSMUST00000098867</a> | <a href="#">100038425</a> | predicted gene, ENSMUSG0000007 | <a href="#">ENSMUSG00000074414</a> | 0.954 | -0.828 | 0.434335 | 0.694762 |

|       |          |                                    |                           |                                |                                    |       |        |          |          |
|-------|----------|------------------------------------|---------------------------|--------------------------------|------------------------------------|-------|--------|----------|----------|
| 12507 | 10505532 | <a href="#">XR_033213</a>          | <a href="#">433716</a>    | similar to ribosomal protein L | <a href="#">LOC433716</a>          | 0.954 | -0.585 | 0.576238 | 0.797276 |
| 12508 | 10383088 | <a href="#">NM_008064</a>          | <a href="#">14387</a>     | glucosidase, alpha, acid       | <a href="#">Gaa</a>                | 0.954 | -1.344 | 0.219655 | 0.488523 |
| 12509 | 10582196 | <a href="#">BC027666</a>           | <a href="#">68918</a>     | RIKEN cDNA 1190005106 gene     | <a href="#">1190005106Rik</a>      | 0.954 | -1.161 | 0.282511 | 0.55755  |
| 12510 | 10519266 |                                    |                           |                                |                                    | 0.954 | -0.7   | 0.505845 | 0.747682 |
| 12511 | 10398315 |                                    |                           |                                |                                    | 0.954 | -1.003 | 0.34851  | 0.622153 |
| 12512 | 10500133 | <a href="#">NM_173347</a>          | <a href="#">229589</a>    | prune homolog (Drosophila)     | <a href="#">Prune</a>              | 0.954 | -1.075 | 0.317095 | 0.594333 |
| 12513 | 10505092 | <a href="#">NM_009011</a>          | <a href="#">19359</a>     | RAD23b homolog (S. cerevisiae) | <a href="#">Rad23b</a>             | 0.954 | -1.758 | 0.120858 | 0.347273 |
| 12514 | 10600341 | <a href="#">NM_007927</a>          | <a href="#">13726</a>     | emerin                         | <a href="#">Emd</a>                | 0.954 | -1.31  | 0.230468 | 0.501476 |
| 12515 | 10371907 | <a href="#">NM_008682</a>          | <a href="#">17997</a>     | neural precursor cell expresse | <a href="#">Nedd1</a>              | 0.954 | -0.848 | 0.42355  | 0.685776 |
| 12516 | 10486081 | <a href="#">NM_027759</a>          | <a href="#">71313</a>     | fibrous sheath-interacting pro | <a href="#">Fsip1</a>              | 0.954 | -0.852 | 0.421469 | 0.683872 |
| 12517 | 10561552 | <a href="#">NM_028659</a>          | <a href="#">73830</a>     | eukaryotic translation initiat | <a href="#">Eif3k</a>              | 0.954 | -1.297 | 0.234609 | 0.505768 |
| 12518 | 10436444 |                                    |                           |                                |                                    | 0.953 | -0.09  | 0.931038 | 0.972759 |
| 12519 | 10438733 | <a href="#">NM_001008230</a>       | <a href="#">224055</a>    | receptor transporter protein 2 | <a href="#">Rtp2</a>               | 0.953 | -0.207 | 0.841405 | 0.935809 |
| 12520 | 10365132 | <a href="#">AK076844</a>           | <a href="#">100038685</a> | predicted gene, ENSMUSG0000007 | <a href="#">ENSMUSG00000071156</a> | 0.953 | -0.01  | 0.991928 | 0.99682  |
| 12521 | 10379779 | <a href="#">NM_030096</a>          | <a href="#">78394</a>     | DEAD (Asp-Glu-Ala-Asp) box pol | <a href="#">Ddx52</a>              | 0.953 | -0.918 | 0.388151 | 0.65688  |
| 12522 | 10513722 | <a href="#">NM_177371</a>          | <a href="#">326623</a>    | tumor necrosis factor (ligand) | <a href="#">Tnfsf15</a>            | 0.953 | -0.288 | 0.781395 | 0.911096 |
| 12523 | 10470001 | <a href="#">AB197927</a>           | <a href="#">72080</a>     | RIKEN cDNA 2010317E24 gene     | <a href="#">2010317E24Rik</a>      | 0.953 | -0.821 | 0.438125 | 0.697167 |
| 12524 | 10544720 | <a href="#">NM_016806</a>          | <a href="#">53379</a>     | heterogeneous nuclear ribonucl | <a href="#">Hnrmpa2b1</a>          | 0.953 | -1.026 | 0.33825  | 0.613849 |
| 12525 | 10477058 | <a href="#">ENSMUST00000064061</a> | <a href="#">545474</a>    | scratch homolog 2, zinc finger | <a href="#">Sct2</a>               | 0.953 | -0.686 | 0.513954 | 0.754437 |
| 12526 | 10372441 |                                    |                           |                                |                                    | 0.953 | -0.267 | 0.797023 | 0.917479 |
| 12527 | 10377541 | <a href="#">NM_030083</a>          | <a href="#">78304</a>     | LSM domain containing 1        | <a href="#">Lsm1</a>               | 0.953 | -1.515 | 0.172319 | 0.424503 |
| 12528 | 10442357 | <a href="#">NM_027220</a>          | <a href="#">69814</a>     | protease, serine, 32           | <a href="#">Prss32</a>             | 0.953 | -0.494 | 0.635686 | 0.83453  |
| 12529 | 10413528 |                                    |                           |                                |                                    | 0.953 | -0.651 | 0.535018 | 0.768753 |
| 12530 | 10582231 | <a href="#">NM_133765</a>          | <a href="#">76454</a>     | F-box protein 31               | <a href="#">Fbxo31</a>             | 0.953 | -0.856 | 0.419619 | 0.681917 |
| 12531 | 10463945 | <a href="#">NM_001085390</a>       | <a href="#">240672</a>    | dual specificity phosphatase 5 | <a href="#">Dusp5</a>              | 0.953 | -0.683 | 0.516197 | 0.755582 |
| 12532 | 10509811 | <a href="#">NM_031873</a>          | <a href="#">83770</a>     | taste receptor, type 1, member | <a href="#">Tas1r2</a>             | 0.953 | -0.596 | 0.569542 | 0.794081 |
| 12533 | 10513824 | <a href="#">NM_145990</a>          | <a href="#">214444</a>    | CDK5 regulatory subunit associ | <a href="#">Cdk5rap2</a>           | 0.953 | -1.175 | 0.277195 | 0.552231 |
| 12534 | 10517443 | <a href="#">NM_013736</a>          | <a href="#">27224</a>     | transcription elongation facto | <a href="#">Tceb3</a>              | 0.953 | -1.636 | 0.144587 | 0.385907 |
| 12535 | 10600531 |                                    |                           |                                |                                    | 0.953 | -0.471 | 0.651536 | 0.843968 |
| 12536 | 10555174 | <a href="#">NM_001113379</a>       | <a href="#">434215</a>    | leucine rich repeat containing | <a href="#">Lrrc32</a>             | 0.953 | -1.199 | 0.268415 | 0.542786 |
| 12537 | 10393591 |                                    |                           |                                |                                    | 0.953 | -0.245 | 0.81327  | 0.9249   |
| 12538 | 10546606 | <a href="#">NM_011666</a>          | <a href="#">22200</a>     | ubiquitin-like modifier activa | <a href="#">Uba3</a>               | 0.953 | -1.008 | 0.346284 | 0.620388 |
| 12539 | 10567219 | <a href="#">NM_019419</a>          | <a href="#">54208</a>     | ADP-ribosylation factor-like 6 | <a href="#">Arl6ip1</a>            | 0.953 | -1.089 | 0.311085 | 0.587683 |
| 12540 | 10383025 | <a href="#">NM_019959</a>          | <a href="#">56745</a>     | C1q and tumor necrosis factor  | <a href="#">C1qtnf1</a>            | 0.953 | -0.409 | 0.694368 | 0.86574  |
| 12541 | 10469979 | <a href="#">ENSMUST00000028340</a> | <a href="#">78217</a>     | RIKEN cDNA 4930571C24 gene     | <a href="#">4930571C24Rik</a>      | 0.953 | -0.258 | 0.803854 | 0.920431 |
| 12542 | 10350590 | <a href="#">XM_916146</a>          | <a href="#">625534</a>    | predicted gene, EG625534       | <a href="#">EG625534</a>           | 0.953 | -0.283 | 0.785331 | 0.912507 |
| 12543 | 10441751 |                                    |                           |                                |                                    | 0.953 | -0.746 | 0.479137 | 0.729179 |
| 12544 | 10363112 | <a href="#">NM_153786</a>          | <a href="#">215031</a>    | vestigial like 2 homolog (Dros | <a href="#">Vgll2</a>              | 0.953 | -0.563 | 0.590372 | 0.806176 |
| 12545 | 10551401 | <a href="#">NM_028417</a>          | <a href="#">73032</a>     | tetratricopeptide repeat domai | <a href="#">Ttc9b</a>              | 0.953 | -0.605 | 0.563757 | 0.790299 |
| 12546 | 10539983 | <a href="#">BC048671</a>           | <a href="#">243535</a>    | cDNA sequence BC048671         | <a href="#">BC048671</a>           | 0.953 | -0.4   | 0.700901 | 0.868962 |
| 12547 | 10570754 | <a href="#">NM_139224</a>          | <a href="#">246084</a>    | defensin beta 35               | <a href="#">Defb35</a>             | 0.953 | -0.147 | 0.887401 | 0.955613 |
| 12548 | 10385083 | <a href="#">NM_146017</a>          | <a href="#">216643</a>    | gamma-aminobutyric acid (GABA- | <a href="#">Gabrp</a>              | 0.953 | -0.413 | 0.69142  | 0.864541 |
| 12549 | 10432972 | <a href="#">NM_011244</a>          | <a href="#">19411</a>     | retinoic acid receptor, gamma  | <a href="#">Rarg</a>               | 0.953 | -0.525 | 0.61561  | 0.822286 |
| 12550 | 10517742 | <a href="#">ENSMUST00000063789</a> | <a href="#">791389</a>    | predicted gene, ENSMUSG0000005 | <a href="#">ENSMUSG00000052098</a> | 0.953 | -0.167 | 0.872019 | 0.948845 |
| 12551 | 10372116 | <a href="#">NM_027945</a>          | <a href="#">71832</a>     | citrate synthase like          | <a href="#">Csl</a>                | 0.953 | -0.709 | 0.500811 | 0.743872 |
| 12552 | 10428004 | <a href="#">NM_027496</a>          | <a href="#">67434</a>     | RIKEN cDNA 5730557B15 gene     | <a href="#">5730557B15Rik</a>      | 0.953 | -0.23  | 0.824388 | 0.929508 |
| 12553 | 10410741 | <a href="#">ENSMUST00000099365</a> | <a href="#">634611</a>    | predicted gene, ENSMUSG0000007 | <a href="#">ENSMUSG00000074798</a> | 0.953 | -0.684 | 0.51508  | 0.754817 |
| 12554 | 10548163 | <a href="#">NM_011657</a>          | <a href="#">22158</a>     | tubby-like protein 3           | <a href="#">Tulp3</a>              | 0.953 | -1.226 | 0.258587 | 0.532776 |
| 12555 | 10489646 | <a href="#">NM_144893</a>          | <a href="#">228875</a>    | solute carrier family 35, memb | <a href="#">Slc35e2</a>            | 0.953 | -0.681 | 0.517286 | 0.756501 |
| 12556 | 10590265 |                                    |                           |                                |                                    | 0.953 | -0.873 | 0.410733 | 0.675052 |
| 12557 | 10439218 | <a href="#">NM_028295</a>          | <a href="#">72599</a>     | protein disulfide isomerase as | <a href="#">Pdia5</a>              | 0.953 | -0.669 | 0.524522 | 0.76103  |

|       |          |                                    |                        |                                |                               |       |        |          |          |
|-------|----------|------------------------------------|------------------------|--------------------------------|-------------------------------|-------|--------|----------|----------|
| 12558 | 10443535 | <a href="#">NM_198647</a>          | <a href="#">381085</a> | TBC1 domain family, member 22B | <a href="#">Tbc1d22b</a>      | 0.953 | -1.196 | 0.269515 | 0.544449 |
| 12559 | 10521702 | <a href="#">ENSMUST00000079389</a> | <a href="#">75783</a>  | RIKEN cDNA 4930431F12 gene     | <a href="#">4930431F12Rik</a> | 0.953 | -1.042 | 0.331195 | 0.60765  |
| 12560 | 10404127 | <a href="#">NM_175658</a>          | <a href="#">319163</a> | histone cluster 1, H2aa        | <a href="#">Hist1h2aa</a>     | 0.953 | -1.292 | 0.236056 | 0.508109 |
| 12561 | 10526120 | <a href="#">NM_013837</a>          | <a href="#">22021</a>  | protein-tyrosine sulfotransfer | <a href="#">Tpst1</a>         | 0.953 | -1.003 | 0.348236 | 0.622132 |
| 12562 | 10585713 | <a href="#">BC112403</a>           | <a href="#">78323</a>  | RIKEN cDNA 2310046O06 gene     | <a href="#">2310046O06Rik</a> | 0.953 | -0.712 | 0.498992 | 0.742429 |
| 12563 | 10493203 | <a href="#">NM_020003</a>          | <a href="#">56700</a>  | RIKEN cDNA 0610031J06 gene     | <a href="#">0610031J06Rik</a> | 0.953 | -1.605 | 0.151345 | 0.395197 |
| 12564 | 10392328 | <a href="#">NM_133702</a>          | <a href="#">68979</a>  | nucleolar protein 11           | <a href="#">Nol11</a>         | 0.953 | -0.993 | 0.352956 | 0.625939 |
| 12565 | 10539441 | <a href="#">AK075695</a>           | <a href="#">320775</a> | RIKEN cDNA B230319C09 gene     | <a href="#">B230319C09Rik</a> | 0.953 | -0.429 | 0.680497 | 0.85838  |
| 12566 | 10581266 | <a href="#">NM_026481</a>          | <a href="#">67971</a>  | tubulin polymerization-promoti | <a href="#">Tppp3</a>         | 0.953 | -0.918 | 0.388476 | 0.657074 |
| 12567 | 10440727 | <a href="#">ENSMUST00000072280</a> | <a href="#">16703</a>  | keratin associated protein 8-1 | <a href="#">Krtap8-1</a>      | 0.953 | -0.618 | 0.555286 | 0.783985 |
| 12568 | 10562132 | <a href="#">NM_009845</a>          | <a href="#">12483</a>  | CD22 antigen                   | <a href="#">Cd22</a>          | 0.953 | -0.826 | 0.435149 | 0.695306 |
| 12569 | 10489532 |                                    |                        |                                |                               | 0.953 | -0.569 | 0.586885 | 0.803854 |
| 12570 | 10571911 | <a href="#">BC042740</a>           | <a href="#">72612</a>  | RIKEN cDNA 2700029M09 gene     | <a href="#">2700029M09Rik</a> | 0.953 | -1.476 | 0.182301 | 0.438828 |
| 12571 | 10430265 | <a href="#">NM_018749</a>          | <a href="#">55944</a>  | eukaryotic translation initiat | <a href="#">Eif3d</a>         | 0.953 | -1.278 | 0.240968 | 0.513974 |
| 12572 | 10387791 | <a href="#">NM_172371</a>          | <a href="#">69309</a>  | solute carrier family 16 (mono | <a href="#">Slc16a13</a>      | 0.953 | -1.267 | 0.244421 | 0.517519 |
| 12573 | 10483766 |                                    |                        |                                |                               | 0.953 | -0.812 | 0.442938 | 0.701639 |
| 12574 | 10385677 | <a href="#">NM_008936</a>          | <a href="#">19127</a>  | paired like homeodomain factor | <a href="#">Prop1</a>         | 0.953 | -0.44  | 0.672645 | 0.854651 |
| 12575 | 10551801 | <a href="#">AK138949</a>           | <a href="#">625421</a> | RIKEN cDNA C230062I16 gene     | <a href="#">C230062I16Rik</a> | 0.953 | -0.883 | 0.405517 | 0.670072 |
| 12576 | 10583573 | <a href="#">NM_153583</a>          | <a href="#">235040</a> | autophagy-related 4D (yeast)   | <a href="#">Atg4d</a>         | 0.953 | -0.721 | 0.493795 | 0.739224 |
| 12577 | 10514315 | <a href="#">NM_010503</a>          | <a href="#">15965</a>  | interferon alpha 2             | <a href="#">Ifiag2</a>        | 0.953 | -0.524 | 0.615859 | 0.822286 |
| 12578 | 10522409 | <a href="#">XR_053350</a>          | <a href="#">607154</a> | similar to ribosomal protein   | <a href="#">LOC667154</a>     | 0.953 | -0.362 | 0.591086 | 0.80656  |
| 12579 | 10445898 | <a href="#">NM_025887</a>          | <a href="#">271457</a> | RAB5A, member RAS oncogene fam | <a href="#">Rab5a</a>         | 0.953 | -0.38  | 0.714959 | 0.875237 |
| 12580 | 10461311 | <a href="#">NM_144872</a>          | <a href="#">225898</a> | echinoderm microtubule associa | <a href="#">Eml3</a>          | 0.953 | -0.781 | 0.459402 | 0.714235 |
| 12581 | 10574098 |                                    |                        |                                |                               | 0.953 | -0.12  | 0.908024 | 0.963723 |
| 12582 | 10401330 | <a href="#">NM_020330</a>          | <a href="#">56622</a>  | a disintegrin and metallopepti | <a href="#">Adam21</a>        | 0.953 | -0.801 | 0.44855  | 0.706139 |
| 12583 | 10395961 | <a href="#">NM_178714</a>          | <a href="#">238205</a> | leucine rich repeat and fibron | <a href="#">Lrfn5</a>         | 0.953 | -0.615 | 0.557449 | 0.785582 |
| 12584 | 10568651 | <a href="#">NM_133941</a>          | <a href="#">101437</a> | DEAH (Asp-Glu-Ala-His) box pol | <a href="#">Dhx32</a>         | 0.953 | -1.208 | 0.265024 | 0.540178 |
| 12585 | 10478014 | <a href="#">NM_198627</a>          | <a href="#">277432</a> | V-set and transmembrane domain | <a href="#">Vstm21</a>        | 0.953 | -0.421 | 0.685961 | 0.861365 |
| 12586 | 10449111 | <a href="#">BC043315</a>           | <a href="#">106618</a> | WD repeat domain 90            | <a href="#">Wdr90</a>         | 0.953 | -0.976 | 0.360722 | 0.632458 |
| 12587 | 10538832 | <a href="#">NM_019499</a>          | <a href="#">56150</a>  | MAD2 (mitotic arrest deficient | <a href="#">Mad211</a>        | 0.953 | -1.22  | 0.260907 | 0.535507 |
| 12588 | 10420089 | <a href="#">NM_008683</a>          | <a href="#">18002</a>  | neural precursor cell expresse | <a href="#">Nedd8</a>         | 0.953 | -1.108 | 0.303241 | 0.579251 |
| 12589 | 10513200 | <a href="#">NM_026132</a>          | <a href="#">67402</a>  | thioredoxin domain containing  | <a href="#">Txndc8</a>        | 0.953 | -0.179 | 0.86249  | 0.944945 |
| 12590 | 10527182 |                                    |                        |                                |                               | 0.953 | -0.799 | 0.449707 | 0.707065 |
| 12591 | 10479230 | <a href="#">NM_028806</a>          | <a href="#">74189</a>  | phosphatase and actin regulato | <a href="#">Phactr3</a>       | 0.953 | -0.79  | 0.454718 | 0.711136 |
| 12592 | 10356001 | <a href="#">NM_016716</a>          | <a href="#">26554</a>  | cullin 3                       | <a href="#">Cul3</a>          | 0.953 | -1.176 | 0.276901 | 0.552079 |
| 12593 | 10358038 | <a href="#">NM_145417</a>          | <a href="#">215615</a> | arginyl aminopeptidase (aminop | <a href="#">Rnpep</a>         | 0.953 | -1.165 | 0.281162 | 0.556689 |
| 12594 | 10551760 | <a href="#">NM_023750</a>          | <a href="#">74352</a>  | zinc finger protein 84         | <a href="#">Zfp84</a>         | 0.953 | -0.872 | 0.411142 | 0.675147 |
| 12595 | 10466120 | <a href="#">NM_001034898</a>       | <a href="#">545279</a> | membrane-spanning 4-domains, s | <a href="#">Ms4a15</a>        | 0.953 | -0.729 | 0.489109 | 0.736349 |
| 12596 | 10499620 | <a href="#">NM_020517</a>          | <a href="#">57275</a>  | lens epithelial protein        | <a href="#">Lenep</a>         | 0.953 | -0.953 | 0.371374 | 0.64202  |
| 12597 | 10472155 | <a href="#">NM_008426</a>          | <a href="#">16519</a>  | potassium inwardly-rectifying  | <a href="#">Kcnj3</a>         | 0.952 | -0.09  | 0.931112 | 0.972759 |
| 12598 | 10352127 | <a href="#">NM_025511</a>          | <a href="#">66359</a>  | RIKEN cDNA 2310005N03 gene     | <a href="#">2310005N03Rik</a> | 0.952 | -0.672 | 0.522382 | 0.75928  |
| 12599 | 10533961 | <a href="#">NM_203319</a>          | <a href="#">208144</a> | DEAH (Asp-Glu-Ala-His) box pol | <a href="#">Dhx37</a>         | 0.952 | -0.256 | 0.805011 | 0.921108 |
| 12600 | 10514842 | <a href="#">ENSMUST00000106770</a> | <a href="#">381538</a> | gene model 1027, (NCBI)        | <a href="#">Gm1027</a>        | 0.952 | -0.789 | 0.455104 | 0.711341 |
| 12601 | 10507555 |                                    |                        |                                |                               | 0.952 | -0.553 | 0.597081 | 0.810309 |
| 12602 | 10546272 | <a href="#">ENSMUST00000101153</a> | <a href="#">232227</a> | IQ motif and Sec7 domain 1     | <a href="#">Iqsec1</a>        | 0.952 | -1.265 | 0.245086 | 0.518209 |
| 12603 | 10359307 | <a href="#">NM_177839</a>          | <a href="#">329278</a> | tenascin N                     | <a href="#">Tnn</a>           | 0.952 | -0.286 | 0.782638 | 0.911672 |
| 12604 | 10516778 | <a href="#">NM_153160</a>          | <a href="#">619605</a> | zinc finger, CCHC domain conta | <a href="#">Zcchc17</a>       | 0.952 | -1.106 | 0.30444  | 0.580964 |
| 12605 | 10478572 | <a href="#">NM_026785</a>          | <a href="#">68612</a>  | ubiquitin-conjugating enzyme E | <a href="#">Ube2c</a>         | 0.952 | -0.963 | 0.366526 | 0.637472 |
| 12606 | 10566457 | <a href="#">NM_009685</a>          | <a href="#">11785</a>  | amyloid beta (A4) precursor pr | <a href="#">Aobb1</a>         | 0.952 | -0.926 | 0.384238 | 0.653466 |

|       |          |                                    |                           |                                   |                                    |       |        |          |          |
|-------|----------|------------------------------------|---------------------------|-----------------------------------|------------------------------------|-------|--------|----------|----------|
| 12607 | 10568709 | <a href="#">NM_178669</a>          | <a href="#">212070</a>    | clarin 3                          | <a href="#">Clrn3</a>              | 0.952 | -0.028 | 0.978659 | 0.991413 |
| 12608 | 10426296 | <a href="#">ENSMUST00000100308</a> | <a href="#">100038621</a> | predicted gene,<br>ENSMUSG0000007 | <a href="#">ENSMUSG00000075469</a> | 0.952 | -0.183 | 0.859842 | 0.943624 |
| 12609 | 10364542 | <a href="#">NM_013459</a>          | <a href="#">11537</a>     | complement factor D (adipsin)     | <a href="#">Cfd</a>                | 0.952 | -0.586 | 0.575981 | 0.797128 |
| 12610 | 10536359 | <a href="#">NM_001077713</a>       | <a href="#">71238</a>     | ACN9 homolog (S. cerevisiae)      | <a href="#">Acn9</a>               | 0.952 | -1.378 | 0.209499 | 0.474666 |
| 12611 | 10510592 |                                    |                           |                                   |                                    | 0.952 | -0.498 | 0.633076 | 0.833233 |
| 12612 | 10583900 | <a href="#">NM_173412</a>          | <a href="#">235067</a>    | cysteine-rich perinuclear thec    | <a href="#">Cypt4</a>              | 0.952 | -1.173 | 0.278001 | 0.553138 |
| 12613 | 10516852 | <a href="#">NM_013622</a>          | <a href="#">18386</a>     | opioid receptor, delta 1          | <a href="#">Oprd1</a>              | 0.952 | -0.689 | 0.512526 | 0.752977 |
| 12614 | 10580532 | <a href="#">ENSMUST00000098517</a> | <a href="#">626231</a>    | predicted gene, EG626231          | <a href="#">EG626231</a>           | 0.952 | -0.616 | 0.557083 | 0.785473 |
| 12615 | 10605917 | <a href="#">ENSMUST00000101369</a> | <a href="#">100038584</a> | predicted gene,<br>OTTMUSG0000001 | <a href="#">OTTMUSG00000018066</a> | 0.952 | -0.767 | 0.46726  | 0.72007  |
| 12616 | 10559784 | <a href="#">NM_146385</a>          | <a href="#">258383</a>    | olfactory receptor 1347           | <a href="#">Olfr1347</a>           | 0.952 | -0.414 | 0.691203 | 0.864526 |
| 12617 | 10572596 | <a href="#">BC005692</a>           | <a href="#">68251</a>     | RIKEN cDNA 5430437P03 gene        | <a href="#">5430437P03Rik</a>      | 0.952 | -0.705 | 0.503132 | 0.745637 |
| 12618 | 10495854 | <a href="#">NM_008939</a>          | <a href="#">19142</a>     | protease, serine, 12 neurotryp    | <a href="#">Prss12</a>             | 0.952 | -0.003 | 0.997572 | 0.999133 |
| 12619 | 10347491 | <a href="#">NM_009526</a>          | <a href="#">22420</a>     | wingless-related MMTV integrat    | <a href="#">Wnt6</a>               | 0.952 | -0.867 | 0.413902 | 0.677396 |
| 12620 | 10377987 | <a href="#">NM_019400</a>          | <a href="#">54189</a>     | rabaptin, RAB GTPase binding e    | <a href="#">Rabep1</a>             | 0.952 | -1.408 | 0.2008   | 0.462697 |
| 12621 | 10361169 | <a href="#">NM_144881</a>          | <a href="#">226861</a>    | hedgehog acyltransferase          | <a href="#">Hhat</a>               | 0.952 | -0.431 | 0.67936  | 0.857678 |
| 12622 | 10376474 | <a href="#">NM_026035</a>          | <a href="#">67212</a>     | mitochondrial ribosomal protei    | <a href="#">Mrpl55</a>             | 0.952 | -1.372 | 0.211231 | 0.476809 |
| 12623 | 10560429 | <a href="#">ENSMUST00000098778</a> | <a href="#">100126357</a> | predicted gene,<br>ENSMUSG0000007 | <a href="#">ENSMUSG00000074355</a> | 0.952 | -0.883 | 0.405578 | 0.670072 |
| 12624 | 10522462 | <a href="#">AK016772</a>           | <a href="#">71184</a>     | RIKEN cDNA 1700112M01<br>gene     | <a href="#">1700112M01Rik</a>      | 0.952 | -0.293 | 0.777552 | 0.909562 |
| 12625 | 10474518 |                                    |                           |                                   |                                    | 0.952 | -0.246 | 0.812213 | 0.924247 |
| 12626 | 10517687 | <a href="#">ENSMUST00000097827</a> | <a href="#">100038595</a> | predicted gene,<br>ENSMUSG0000007 | <a href="#">ENSMUSG00000073739</a> | 0.952 | -0.958 | 0.369167 | 0.639859 |
| 12627 | 10546249 | <a href="#">BC047211</a>           | <a href="#">243538</a>    | coiled-coil domain containing     | <a href="#">Ccdc37</a>             | 0.952 | -0.458 | 0.660484 | 0.848669 |
| 12628 | 10349913 | <a href="#">NM_178260</a>          | <a href="#">280287</a>    | KiSS-1 metastasis-suppressor      | <a href="#">Kiss1</a>              | 0.952 | -0.414 | 0.690988 | 0.864447 |
| 12629 | 10607952 | <a href="#">NM_011515</a>          | <a href="#">20955</a>     | vesicle-associated membrane pr    | <a href="#">Vamp7</a>              | 0.952 | -1.327 | 0.224885 | 0.494934 |
| 12630 | 10391870 | <a href="#">NM_016896</a>          | <a href="#">53859</a>     | mitogen-activated protein kina    | <a href="#">Map3k14</a>            | 0.952 | -0.443 | 0.67063  | 0.853845 |
| 12631 | 10499937 |                                    |                           |                                   |                                    | 0.952 | -0.363 | 0.726894 | 0.881629 |
| 12632 | 10373647 | <a href="#">NM_146795</a>          | <a href="#">258791</a>    | olfactory receptor 812            | <a href="#">Olfr812</a>            | 0.952 | -0.633 | 0.546399 | 0.777695 |
| 12633 | 10377055 | <a href="#">NM_001039545</a>       | <a href="#">17882</a>     | myosin, heavy polypeptide 2, s    | <a href="#">Myh2</a>               | 0.952 | -1.068 | 0.319837 | 0.596635 |
| 12634 | 10361754 | <a href="#">NM_010146</a>          | <a href="#">13853</a>     | epilepsy, progressive myocloni    | <a href="#">Epm2a</a>              | 0.952 | -0.33  | 0.750491 | 0.894497 |
| 12635 | 10488608 | <a href="#">NM_175093</a>          | <a href="#">228775</a>    | tribbles homolog 3 (Drosophila    | <a href="#">Trib3</a>              | 0.952 | -0.312 | 0.763685 | 0.901533 |
| 12636 | 10465282 | <a href="#">NM_008893</a>          | <a href="#">18969</a>     | polymerase (DNA directed), alp    | <a href="#">Pola2</a>              | 0.952 | -0.725 | 0.49128  | 0.737713 |
| 12637 | 10546551 | <a href="#">NR_003643</a>          | <a href="#">78482</a>     | RIKEN cDNA 1700123L14 gene        | <a href="#">1700123L14Rik</a>      | 0.952 | -0.405 | 0.697021 | 0.867134 |
| 12638 | 10461558 | <a href="#">NM_023044</a>          | <a href="#">65221</a>     | solute carrier family 15, memb    | <a href="#">Slc15a3</a>            | 0.952 | -0.248 | 0.811063 | 0.923783 |
| 12639 | 10438338 |                                    |                           |                                   |                                    | 0.952 | -0.268 | 0.796532 | 0.917464 |
| 12640 | 10507657 | <a href="#">NM_172699</a>          | <a href="#">230700</a>    | forkhead box J3                   | <a href="#">Foxj3</a>              | 0.952 | -1.117 | 0.299671 | 0.575741 |
| 12641 | 10367475 |                                    |                           |                                   |                                    | 0.952 | -0.322 | 0.756944 | 0.898026 |
| 12642 | 10364451 | <a href="#">NM_148934</a>          | <a href="#">110012</a>    | gene trap ROSA b-geo 22           | <a href="#">Gtrgeo22</a>           | 0.952 | -0.755 | 0.474104 | 0.725639 |
| 12643 | 10386665 | <a href="#">NM_001033542</a>       | <a href="#">380701</a>    | solute carrier family 47, memb    | <a href="#">Slc47a2</a>            | 0.952 | -0.546 | 0.60163  | 0.813251 |
| 12644 | 10588081 | <a href="#">NM_012020</a>          | <a href="#">26927</a>     | forkhead box L2                   | <a href="#">Foxl2</a>              | 0.952 | -0.866 | 0.414204 | 0.677446 |
| 12645 | 10453102 | <a href="#">NM_146083</a>          | <a href="#">225027</a>    | splicing factor, arginine/seri    | <a href="#">Sfrs7</a>              | 0.952 | -1.138 | 0.29157  | 0.567624 |
| 12646 | 10347307 | <a href="#">NM_174985</a>          | <a href="#">227289</a>    | G protein-coupled bile acid re    | <a href="#">Gpbar1</a>             | 0.952 | -0.503 | 0.629792 | 0.831325 |
| 12647 | 10579347 | <a href="#">NM_023065</a>          | <a href="#">65972</a>     | interferon gamma inducible pro    | <a href="#">Ifi30</a>              | 0.952 | -1.455 | 0.187874 | 0.446188 |
| 12648 | 10574104 | <a href="#">ENSMUST00000053085</a> | <a href="#">434341</a>    | NLR family, CARD domain<br>contai | <a href="#">Nlr5</a>               | 0.952 | -0.704 | 0.503692 | 0.746064 |
| 12649 | 10549723 | <a href="#">NM_170759</a>          | <a href="#">232816</a>    | zinc finger protein 628           | <a href="#">Zfp628</a>             | 0.952 | -0.877 | 0.408669 | 0.673019 |
| 12650 | 10351843 | <a href="#">NM_177723</a>          | <a href="#">240916</a>    | V-set and immunoglobulin<br>domai | <a href="#">Vsig8</a>              | 0.952 | -0.576 | 0.582125 | 0.800654 |
| 12651 | 10419167 | <a href="#">NM_008962</a>          | <a href="#">19214</a>     | prostaglandin D receptor          | <a href="#">Ptgdr</a>              | 0.952 | -0.618 | 0.555807 | 0.784407 |
| 12652 | 10535902 |                                    |                           |                                   |                                    | 0.952 | 0.251  | 0.808928 | 0.923112 |
| 12653 | 10350199 | <a href="#">NM_001081023</a>       | <a href="#">12292</a>     | calcium channel, voltage-depen    | <a href="#">Cacna1s</a>            | 0.952 | -0.486 | 0.641429 | 0.837493 |
| 12654 | 10420628 | <a href="#">XR_033691</a>          | <a href="#">432864</a>    | predicted gene, EG432864          | <a href="#">EG432864</a>           | 0.952 | -0.923 | 0.38575  | 0.654755 |
| 12655 | 10464013 |                                    |                           |                                   |                                    | 0.952 | -0.702 | 0.504951 | 0.747039 |
| 12656 | 10465943 | <a href="#">NM_198114</a>          | <a href="#">269060</a>    | diacylglycerol lipase, alpha      | <a href="#">Dagla</a>              | 0.952 | -0.407 | 0.695909 | 0.866433 |
| 12657 | 10456887 | <a href="#">ENSMUST00000059746</a> | <a href="#">240411</a>    | lipxygenase homology domains      | <a href="#">Loxhd1</a>             | 0.952 | -0.047 | 0.963606 | 0.985728 |

|       |          |                                    |                           |                                |                                    |       |        |           |          |
|-------|----------|------------------------------------|---------------------------|--------------------------------|------------------------------------|-------|--------|-----------|----------|
| 12658 | 10403706 | <a href="#">NM_008944</a>          | <a href="#">19166</a>     | proteasome (prosome, macropain | <a href="#">Psm2</a>               | 0.952 | -1.387 | 0.206769  | 0.471259 |
| 12659 | 10476819 | <a href="#">NM_001033298</a>       | <a href="#">228730</a>    | gene model 114, (NCBI)         | <a href="#">Gm114</a>              | 0.952 | -1.299 | 0.23398   | 0.505288 |
| 12660 | 10531215 | <a href="#">NM_030886</a>          | <a href="#">81702</a>     | ankyrin repeat domain 17       | <a href="#">Ankrd17</a>            | 0.952 | -1.422 | 0.19667   | 0.457369 |
| 12661 | 10533504 | <a href="#">NM_009879</a>          | <a href="#">12589</a>     | intraflagellar transport 81 ho | <a href="#">Ifit81</a>             | 0.952 | -1.427 | 0.195479  | 0.455756 |
| 12662 | 10415957 | <a href="#">XR_034757</a>          | <a href="#">100043657</a> | similar to Nonhistone chromoso | <a href="#">LOC100043657</a>       | 0.952 | -0.344 | 0.740348  | 0.889357 |
| 12663 | 10534531 | <a href="#">NM_018871</a>          | <a href="#">22628</a>     | tyrosine 3-monooxygenase/trypt | <a href="#">Ywhag</a>              | 0.952 | -1.231 | 0.256973  | 0.531335 |
| 12664 | 10489349 | <a href="#">NM_026630</a>          | <a href="#">68236</a>     | gametocyte specific factor 1-1 | <a href="#">Gtsf11</a>             | 0.952 | -1.105 | 0.304832  | 0.581243 |
| 12665 | 10376163 | <a href="#">NM_175258</a>          | <a href="#">192786</a>    | Rap guanine nucleotide exchang | <a href="#">Rapgef6</a>            | 0.952 | -1.148 | 0.287762  | 0.563515 |
| 12666 | 10409786 | <a href="#">NM_028157</a>          | <a href="#">72219</a>     | RIKEN cDNA 1700013B16 gene     | <a href="#">1700013B16Rik</a>      | 0.952 | -0.14  | 0.892621  | 0.957773 |
| 12667 | 10592044 | <a href="#">NM_144936</a>          | <a href="#">235135</a>    | transmembrane protein 45b      | <a href="#">Tmem45b</a>            | 0.952 | -0.359 | 0.730033  | 0.883264 |
| 12668 | 10390308 | <a href="#">NM_030220</a>          | <a href="#">78912</a>     | Sp2 transcription factor       | <a href="#">Sp2</a>                | 0.952 | -0.751 | 0.476611  | 0.727638 |
| 12669 | 10579209 | <a href="#">NM_133972</a>          | <a href="#">76813</a>     | armadillo repeat containing 6  | <a href="#">Armc6</a>              | 0.952 | -0.969 | 0.363838  | 0.63526  |
| 12670 | 10433973 | <a href="#">NM_178922</a>          | <a href="#">58180</a>     | hypermethylated in cancer 2    | <a href="#">Hic2</a>               | 0.952 | -1.035 | 0.333945  | 0.609581 |
| 12671 | 10550636 |                                    |                           |                                |                                    | 0.952 | -0.783 | 0.458468  | 0.713665 |
| 12672 | 10530441 | <a href="#">NM_016869</a>          | <a href="#">53419</a>     | corin                          | <a href="#">Corin</a>              | 0.952 | -0.844 | 0.425915  | 0.687657 |
| 12673 | 10373814 | <a href="#">NM_022889</a>          | <a href="#">64934</a>     | pescadillo homolog 1, containi | <a href="#">Pes1</a>               | 0.952 | -0.637 | 0.543893  | 0.776035 |
| 12674 | 10580829 | <a href="#">ENSMUST00000070212</a> | <a href="#">333329</a>    | cyclic nucleotide gated channe | <a href="#">Cngb1</a>              | 0.952 | -0.761 | 0.470563  | 0.722494 |
| 12675 | 10477233 | <a href="#">NM_001011732</a>       | <a href="#">228787</a>    | X Kell blood group precursor r | <a href="#">Xkr7</a>               | 0.952 | -0.509 | 0.626228  | 0.82979  |
| 12676 | 10526055 | <a href="#">NM_008095</a>          | <a href="#">14467</a>     | glioblastoma amplified sequenc | <a href="#">Gbas</a>               | 0.951 | -2.169 | 0.0655696 | 0.2387   |
| 12677 | 10393793 | <a href="#">NM_012065</a>          | <a href="#">18588</a>     | phosphodiesterase 6G, cGMP-spe | <a href="#">Pde6g</a>              | 0.951 | -0.447 | 0.668123  | 0.851935 |
| 12678 | 10490192 |                                    |                           |                                |                                    | 0.951 | -0.139 | 0.893156  | 0.957774 |
| 12679 | 10402334 | <a href="#">ENSMUST00000056140</a> | <a href="#">77225</a>     | RIKEN cDNA 9330161L09 gene     | <a href="#">9330161L09Rik</a>      | 0.951 | -0.593 | 0.571141  | 0.795324 |
| 12680 | 10375543 | <a href="#">NM_146471</a>          | <a href="#">258463</a>    | olfactory receptor 1393        | <a href="#">Olf1393</a>            | 0.951 | 0.073  | 0.944037  | 0.977948 |
| 12681 | 10397112 | <a href="#">NM_130887</a>          | <a href="#">170721</a>    | papilin, proteoglycan-like sul | <a href="#">Papln</a>              | 0.951 | -0.452 | 0.664245  | 0.850267 |
| 12682 | 10387944 | <a href="#">NM_178116</a>          | <a href="#">216874</a>    | calmodulin binding transcripti | <a href="#">Camta2</a>             | 0.951 | -0.675 | 0.520937  | 0.758585 |
| 12683 | 10426503 | <a href="#">XR_032232</a>          | <a href="#">676777</a>    | similar to Eukaryotic translat | <a href="#">LOC676777</a>          | 0.951 | 0.17   | 0.869369  | 0.947675 |
| 12684 | 10456519 |                                    |                           |                                |                                    | 0.951 | -0.649 | 0.536747  | 0.76984  |
| 12685 | 10383010 | <a href="#">U72673</a>             | <a href="#">12702</a>     | suppressor of cytokine signali | <a href="#">Socs3</a>              | 0.951 | -0.877 | 0.408547  | 0.672914 |
| 12686 | 10499429 | <a href="#">ENSMUST00000090946</a> | <a href="#">791281</a>    | predicted gene, ENSMUSG0000006 | <a href="#">ENSMUSG00000068924</a> | 0.951 | -0.352 | 0.735063  | 0.886784 |
| 12687 | 10458709 | <a href="#">NM_001033280</a>       | <a href="#">225443</a>    | gene model 94, (NCBI)          | <a href="#">Gm94</a>               | 0.951 | -0.173 | 0.867716  | 0.947039 |
| 12688 | 10369431 | <a href="#">NM_001081127</a>       | <a href="#">237360</a>    | a disintegrin-like and metallo | <a href="#">Adamts14</a>           | 0.951 | -1.027 | 0.337514  | 0.613145 |
| 12689 | 10429430 | <a href="#">NM_001033365</a>       | <a href="#">268816</a>    | gene model 628, (NCBI)         | <a href="#">Gm628</a>              | 0.951 | -0.42  | 0.686795  | 0.861816 |
| 12690 | 10503917 | <a href="#">NM_001007589</a>       | <a href="#">433693</a>    | RIKEN cDNA 2700059D21 gene     | <a href="#">2700059D21Rik</a>      | 0.951 | -1.048 | 0.328348  | 0.604702 |
| 12691 | 10465580 | <a href="#">NM_026675</a>          | <a href="#">68323</a>     | nudix (nucleoside diphosphate  | <a href="#">Nudt22</a>             | 0.951 | -1.21  | 0.264302  | 0.539369 |
| 12692 | 10591999 | <a href="#">ENSMUST00000068033</a> | <a href="#">100036527</a> | predicted gene, ENSMUSG0000005 | <a href="#">ENSMUSG00000054797</a> | 0.951 | -0.88  | 0.40746   | 0.671862 |
| 12693 | 10442596 | <a href="#">NM_013759</a>          | <a href="#">27361</a>     | selenoprotein X 1              | <a href="#">Sepx1</a>              | 0.951 | -0.752 | 0.475732  | 0.727129 |
| 12694 | 10453390 | <a href="#">NR_015387</a>          | <a href="#">100043902</a> | Six3 opposite strand transcrip | <a href="#">Six3os1</a>            | 0.951 | -0.056 | 0.956917  | 0.983559 |
| 12695 | 10425166 | <a href="#">NM_133800</a>          | <a href="#">97961</a>     | nucleolar protein 12           | <a href="#">Nol12</a>              | 0.951 | -1.281 | 0.23975   | 0.512773 |
| 12696 | 10450790 | <a href="#">NM_177636</a>          | <a href="#">224756</a>    | histocompatibility 2, M region | <a href="#">H2-M1</a>              | 0.951 | -0.287 | 0.781968  | 0.911385 |
| 12697 | 10446190 | <a href="#">BC116283</a>           | <a href="#">78625</a>     | RIKEN cDNA 1700061G19 gene     | <a href="#">1700061G19Rik</a>      | 0.951 | -0.212 | 0.83802   | 0.934421 |
| 12698 | 10402570 | <a href="#">ENSMUST00000101053</a> | <a href="#">544890</a>    | predicted gene, ENSMUSG0000007 | <a href="#">ENSMUSG00000072840</a> | 0.951 | -0.15  | 0.885055  | 0.954881 |
| 12699 | 10382852 | <a href="#">NM_178620</a>          | <a href="#">69900</a>     | major facilitator superfamily  | <a href="#">Mfsd11</a>             | 0.951 | -0.637 | 0.543616  | 0.775859 |
| 12700 | 10443814 | <a href="#">ENSMUST00000013706</a> | <a href="#">78104</a>     | RIKEN cDNA 4833413E03 gene     | <a href="#">4833413E03Rik</a>      | 0.951 | -0.944 | 0.375819  | 0.645831 |
| 12701 | 10523960 | <a href="#">NM_001081234</a>       | <a href="#">433931</a>    | phosphatidylinositol glycan an | <a href="#">Pigg</a>               | 0.951 | -0.8   | 0.449484  | 0.706889 |
| 12702 | 10527667 | <a href="#">NM_029440</a>          | <a href="#">381693</a>    | RIKEN cDNA 4930434E21 gene     | <a href="#">4930434E21Rik</a>      | 0.951 | -0.506 | 0.62779   | 0.830715 |
| 12703 | 10550102 | <a href="#">NM_001083188</a>       | <a href="#">16881</a>     | ligase I, DNA, ATP-dependent   | <a href="#">Lig1</a>               | 0.951 | -1.543 | 0.165396  | 0.415485 |
| 12704 | 10455212 | <a href="#">BC002117</a>           | <a href="#">66839</a>     | RIKEN cDNA 0610009O20 gene     | <a href="#">0610009O20Rik</a>      | 0.951 | -1.03  | 0.33615   | 0.611869 |
| 12705 | 10476680 | <a href="#">AF332089</a>           | <a href="#">171588</a>    | zinc finger protein 133        | <a href="#">Zfp133</a>             | 0.951 | -0.298 | 0.77408   | 0.907069 |
| 12706 | 10364222 | <a href="#">NM_080845</a>          | <a href="#">14317</a>     | formiminotransferase cyclodeam | <a href="#">Ftcd</a>               | 0.951 | -0.254 | 0.806454  | 0.921832 |
| 12707 | 10440664 | <a href="#">BC133700</a>           | <a href="#">69661</a>     | RIKEN cDNA 2310061N02 gene     | <a href="#">2310061N02Rik</a>      | 0.951 | 0.075  | 0.941996  | 0.977645 |

|       |          |                                    |                           |                                 |                                    |       |        |          |          |
|-------|----------|------------------------------------|---------------------------|---------------------------------|------------------------------------|-------|--------|----------|----------|
| 12708 | 10402325 | <a href="#">NM_023049</a>          | <a href="#">65256</a>     | ankyrin repeat and SOCS box-co  | <a href="#">Asb2</a>               | 0.951 | -0.276 | 0.790149 | 0.914502 |
| 12709 | 10541738 | <a href="#">ENSMUST00000069553</a> | <a href="#">442825</a>    | RIKEN cDNA A230083G16 gene      | <a href="#">A230083G16Rik</a>      | 0.951 | -0.624 | 0.551973 | 0.781881 |
| 12710 | 10371770 | <a href="#">NM_001033331</a>       | <a href="#">237436</a>    | growth arrest-specific 2 like   | <a href="#">Gas2l3</a>             | 0.951 | -1.005 | 0.347259 | 0.621483 |
| 12711 | 10426150 | <a href="#">NM_001002005</a>       | <a href="#">406218</a>    | pannexin 2                      | <a href="#">Panx2</a>              | 0.951 | -0.412 | 0.692285 | 0.865004 |
| 12712 | 10582712 | <a href="#">NM_053207</a>          | <a href="#">112405</a>    | EGL nine homolog 1 (C. elegans) | <a href="#">Egln1</a>              | 0.951 | -1.105 | 0.304654 | 0.581126 |
| 12713 | 10489542 | <a href="#">ENSMUST00000043448</a> | <a href="#">71850</a>     | WAP four-disulfide core domain  | <a href="#">Wfdc3</a>              | 0.951 | -0.705 | 0.503140 | 0.745637 |
| 12714 | 10568605 | <a href="#">NM_009980</a>          | <a href="#">13017</a>     | C-terminal binding protein 2    | <a href="#">Ctbp2</a>              | 0.951 | -1.193 | 0.270547 | 0.545253 |
| 12715 | 10368277 | <a href="#">AF357393</a>           | <a href="#">20042</a>     | ribosomal protein S12           | <a href="#">Rps12</a>              | 0.951 | -0.685 | 0.514832 | 0.754817 |
| 12716 | 10556691 | <a href="#">NM_001081446</a>       | <a href="#">434232</a>    | IQ motif containing K           | <a href="#">Iqck</a>               | 0.951 | -0.344 | 0.740848 | 0.889595 |
| 12717 | 10476725 | <a href="#">NM_001033297</a>       | <a href="#">228715</a>    | gene model 561, (NCBI)          | <a href="#">Gm561</a>              | 0.951 | -0.897 | 0.398474 | 0.664721 |
| 12718 | 10466054 | <a href="#">NM_009852</a>          | <a href="#">12511</a>     | CD6 antigen                     | <a href="#">Cd6</a>                | 0.951 | -0.968 | 0.364588 | 0.635729 |
| 12719 | 10406710 | <a href="#">NM_009321</a>          | <a href="#">21371</a>     | tubulin cofactor a              | <a href="#">Tbca</a>               | 0.951 | -1.188 | 0.272658 | 0.547117 |
| 12720 | 10416120 | <a href="#">ENSMUST00000052898</a> | <a href="#">75892</a>     | RIKEN cDNA 4930578I07 gene      | <a href="#">4930578I07Rik</a>      | 0.951 | -0.363 | 0.727139 | 0.881698 |
| 12721 | 10372001 |                                    |                           |                                 |                                    | 0.951 | -0.944 | 0.375537 | 0.645662 |
| 12722 | 10599554 | <a href="#">NM_173376</a>          | <a href="#">209003</a>    | RNA binding motif protein, X-1  | <a href="#">RbmX2</a>              | 0.951 | -1.127 | 0.295906 | 0.572322 |
| 12723 | 10570666 | <a href="#">XR_030959</a>          | <a href="#">637882</a>    | similar to 60S ribosomal prote  | <a href="#">LOC637882</a>          | 0.951 | -0.803 | 0.447433 | 0.70522  |
| 12724 | 10542750 | <a href="#">NM_025315</a>          | <a href="#">108098</a>    | mediator complex subunit 21     | <a href="#">Med21</a>              | 0.951 | -1.408 | 0.20079  | 0.462697 |
| 12725 | 10360522 | <a href="#">NM_007422</a>          | <a href="#">11566</a>     | adenylosuccinate synthetase, n  | <a href="#">Adss</a>               | 0.951 | -1.275 | 0.241941 | 0.514804 |
| 12726 | 10386180 |                                    |                           |                                 |                                    | 0.951 | -0.365 | 0.725673 | 0.881163 |
| 12727 | 10429407 |                                    |                           |                                 |                                    | 0.951 | -0.453 | 0.663958 | 0.850267 |
| 12728 | 10572357 | <a href="#">NM_021538</a>          | <a href="#">59042</a>     | coatamer protein complex, subu  | <a href="#">Cope</a>               | 0.951 | -1.492 | 0.178208 | 0.432908 |
| 12729 | 10594785 | <a href="#">NM_033604</a>          | <a href="#">93836</a>     | ring finger 111                 | <a href="#">Rnf111</a>             | 0.951 | -1.091 | 0.31045  | 0.587082 |
| 12730 | 10543054 | <a href="#">NM_009169</a>          | <a href="#">20422</a>     | split hand/foot malformation (  | <a href="#">Shfm1</a>              | 0.951 | -1.394 | 0.204848 | 0.4682   |
| 12731 | 10497105 | <a href="#">NM_024194</a>          | <a href="#">67144</a>     | leucine rich repeat containing  | <a href="#">Lrrc40</a>             | 0.951 | -1.56  | 0.161527 | 0.409658 |
| 12732 | 10541545 | <a href="#">NM_026267</a>          | <a href="#">67602</a>     | NECAP endocytosis associated 1  | <a href="#">Necap1</a>             | 0.951 | -1.453 | 0.188245 | 0.446318 |
| 12733 | 10359593 | <a href="#">NM_008030</a>          | <a href="#">14262</a>     | flavin containing monooxygenas  | <a href="#">Fmo3</a>               | 0.951 | -0.498 | 0.633156 | 0.833255 |
| 12734 | 10604154 | <a href="#">NM_023894</a>          | <a href="#">104384</a>    | reproductive homeobox 9         | <a href="#">RhoX9</a>              | 0.951 | -0.583 | 0.577658 | 0.797824 |
| 12735 | 10375380 | <a href="#">XR_031806</a>          | <a href="#">633082</a>    | ferritin light chain 1 pseudog  | <a href="#">LOC633082</a>          | 0.951 | -0.333 | 0.748714 | 0.893678 |
| 12736 | 10364009 | <a href="#">NM_001081412</a>       | <a href="#">110279</a>    | breakpoint cluster region homo  | <a href="#">Bcr</a>                | 0.951 | -0.718 | 0.495515 | 0.740384 |
| 12737 | 10526792 | <a href="#">NM_001081108</a>       | <a href="#">66096</a>     | RIKEN cDNA 0910001L09 gene      | <a href="#">0910001L09Rik</a>      | 0.951 | -1.171 | 0.278736 | 0.553649 |
| 12738 | 10466270 |                                    |                           |                                 |                                    | 0.951 | -0.441 | 0.672065 | 0.854437 |
| 12739 | 10381395 | <a href="#">NM_172566</a>          | <a href="#">217201</a>    | RUN domain containing 1         | <a href="#">Runde1</a>             | 0.951 | -1.025 | 0.338401 | 0.613965 |
| 12740 | 10590686 | <a href="#">NM_027942</a>          | <a href="#">71829</a>     | DDI1, DNA-damage inducible 1,   | <a href="#">Ddi1</a>               | 0.951 | -0.359 | 0.729945 | 0.883264 |
| 12741 | 10360012 | <a href="#">NM_001029984</a>       | <a href="#">435653</a>    | Fc receptor-like B              | <a href="#">Fcr1b</a>              | 0.951 | -0.465 | 0.655673 | 0.845958 |
| 12742 | 10368703 | <a href="#">NM_001113385</a>       | <a href="#">215928</a>    | cDNA sequence BC021785          | <a href="#">BC021785</a>           | 0.951 | -0.77  | 0.465998 | 0.71957  |
| 12743 | 10429216 | <a href="#">ENSMUST00000022953</a> | <a href="#">70363</a>     | RIKEN cDNA 1700010C24 gene      | <a href="#">1700010C24Rik</a>      | 0.951 | -1.207 | 0.265367 | 0.540498 |
| 12744 | 10455591 |                                    |                           |                                 |                                    | 0.951 | -0.846 | 0.424483 | 0.686543 |
| 12745 | 10506658 | <a href="#">BC021897</a>           | <a href="#">72938</a>     | RIKEN cDNA 2900042B11 gene      | <a href="#">2900042B11Rik</a>      | 0.95  | -0.766 | 0.467952 | 0.720483 |
| 12746 | 10370259 | <a href="#">NM_009929</a>          | <a href="#">12822</a>     | collagen, type XVIII, alpha 1   | <a href="#">Col18a1</a>            | 0.95  | -0.714 | 0.497722 | 0.741949 |
| 12747 | 10414990 |                                    |                           |                                 |                                    | 0.95  | -1.021 | 0.340393 | 0.61558  |
| 12748 | 10465633 | <a href="#">NM_007750</a>          | <a href="#">12868</a>     | cytochrome c oxidase, subunit   | <a href="#">Cox8a</a>              | 0.95  | -1.548 | 0.164363 | 0.414169 |
| 12749 | 10424335 | <a href="#">NM_175226</a>          | <a href="#">75841</a>     | ring finger protein 139         | <a href="#">Rnf139</a>             | 0.95  | -0.768 | 0.466667 | 0.719708 |
| 12750 | 10591281 | <a href="#">NM_016919</a>          | <a href="#">53867</a>     | collagen, type V, alpha 3       | <a href="#">Col5a3</a>             | 0.95  | -0.803 | 0.447554 | 0.705227 |
| 12751 | 10440471 | <a href="#">NM_017404</a>          | <a href="#">27393</a>     | mitochondrial ribosomal protei  | <a href="#">Mrpl39</a>             | 0.95  | -1.036 | 0.333679 | 0.609432 |
| 12752 | 10540059 | <a href="#">NM_027868</a>          | <a href="#">71699</a>     | solute carrier family 41, memb  | <a href="#">Slc41a3</a>            | 0.95  | -0.499 | 0.632348 | 0.832782 |
| 12753 | 10401705 | <a href="#">NM_001080943</a>       | <a href="#">238331</a>    | zinc finger, DHHC-type contain  | <a href="#">Zdhhc22</a>            | 0.95  | -0.243 | 0.815039 | 0.925775 |
| 12754 | 10380219 | <a href="#">NM_016686</a>          | <a href="#">22344</a>     | vascular endothelial zinc fing  | <a href="#">Vezf1</a>              | 0.95  | -1.369 | 0.212008 | 0.47745  |
| 12755 | 10402554 | <a href="#">NM_001079883</a>       | <a href="#">58208</a>     | B-cell leukemia/lymphoma 11B    | <a href="#">Bcl11b</a>             | 0.95  | -0.54  | 0.605207 | 0.815791 |
| 12756 | 10599425 | <a href="#">NM_028514</a>          | <a href="#">73360</a>     | actin-related protein T1        | <a href="#">Actr1</a>              | 0.95  | -0.471 | 0.65177  | 0.844083 |
| 12757 | 10437224 | <a href="#">NR_003508</a>          | <a href="#">17858</a>     | myxovirus (influenza virus) re  | <a href="#">Mx2</a>                | 0.95  | -0.941 | 0.376992 | 0.647069 |
| 12758 | 10419286 | <a href="#">ENSMUST00000100671</a> | <a href="#">100038654</a> | predicted gene, ENSMUSG0000007  | <a href="#">ENSMUSG00000072589</a> | 0.95  | -0.245 | 0.813618 | 0.925035 |
| 12759 | 10551405 | <a href="#">NM_198417</a>          | <a href="#">112415</a>    | RIKEN cDNA C030039L03 gene      | <a href="#">C030039L03Rik</a>      | 0.95  | -1.196 | 0.269443 | 0.544395 |
| 12760 | 10375951 | <a href="#">BC034829</a>           | <a href="#">213673</a>    | RIKEN cDNA 9530068E07 gene      | <a href="#">9530068E07Rik</a>      | 0.95  | -0.927 | 0.383934 | 0.653352 |

|       |          |                                    |                           |                                |                                    |      |        |          |          |
|-------|----------|------------------------------------|---------------------------|--------------------------------|------------------------------------|------|--------|----------|----------|
| 12761 | 10409099 | <a href="#">NM_001033268</a>       | <a href="#">218236</a>    | cDNA sequence BC010304         | <a href="#">BC010304</a>           | 0.95 | -0.792 | 0.453608 | 0.710123 |
| 12762 | 10473861 | <a href="#">NM_028733</a>          | <a href="#">80708</a>     | protein kinase C and casein ki | <a href="#">Pacsin3</a>            | 0.95 | -0.714 | 0.497765 | 0.741949 |
| 12763 | 10477100 | <a href="#">XR_035000</a>          | <a href="#">628060</a>    | similar to ribosomal protein l | <a href="#">LOC628060</a>          | 0.95 | -1.042 | 0.331005 | 0.607479 |
| 12764 | 10493626 | <a href="#">BC048560</a>           | <a href="#">73545</a>     | RIKEN cDNA 1700094D03 gene     | <a href="#">1700094D03Rik</a>      | 0.95 | -0.585 | 0.576658 | 0.797596 |
| 12765 | 10393136 | <a href="#">NM_172571</a>          | <a href="#">217335</a>    | Fas (TNFRSF6) binding factor 1 | <a href="#">Fbf1</a>               | 0.95 | -1.113 | 0.30155  | 0.577839 |
| 12766 | 10562172 | <a href="#">NM_011680</a>          | <a href="#">22282</a>     | upstream transcription factor  | <a href="#">Usf2</a>               | 0.95 | -1.074 | 0.317481 | 0.594727 |
| 12767 | 10402415 | <a href="#">NM_199314</a>          | <a href="#">380780</a>    | serine (or cysteine) peptidase | <a href="#">Serpina11</a>          | 0.95 | -1.07  | 0.319292 | 0.596377 |
| 12768 | 10418950 | <a href="#">NM_001039074</a>       | <a href="#">24131</a>     | LIM domain binding 3           | <a href="#">Ldb3</a>               | 0.95 | -0.503 | 0.629981 | 0.831325 |
| 12769 | 10591446 | <a href="#">NM_018793</a>          | <a href="#">54721</a>     | tyrosine kinase 2              | <a href="#">Tyk2</a>               | 0.95 | -1.011 | 0.34469  | 0.618844 |
| 12770 | 10359888 | <a href="#">XM_917451</a>          | <a href="#">640480</a>    | similar to suppressor of initi | <a href="#">LOC640480</a>          | 0.95 | -0.306 | 0.768395 | 0.903712 |
| 12771 | 10455653 | <a href="#">AK170322</a>           | <a href="#">100038430</a> | predicted gene, ENSMUSG0000007 | <a href="#">ENSMUSG00000073567</a> | 0.95 | -0.606 | 0.563296 | 0.789914 |
| 12772 | 10369815 | <a href="#">NM_007659</a>          | <a href="#">12534</a>     | cell division cycle 2 homolog  | <a href="#">Cdc2a</a>              | 0.95 | -1.269 | 0.243738 | 0.516777 |
| 12773 | 10356088 | <a href="#">NM_007735</a>          | <a href="#">12829</a>     | collagen, type IV, alpha 4     | <a href="#">Col4a4</a>             | 0.95 | -0.857 | 0.418934 | 0.681438 |
| 12774 | 10450435 | <a href="#">NM_009975</a>          | <a href="#">13001</a>     | casein kinase 2, beta polypept | <a href="#">Csnk2b</a>             | 0.95 | -1.426 | 0.195561 | 0.455892 |
| 12775 | 10352314 | <a href="#">NM_010094</a>          | <a href="#">13590</a>     | left right determination facto | <a href="#">Lefty1</a>             | 0.95 | -0.699 | 0.506466 | 0.748338 |
| 12776 | 10393728 | <a href="#">NM_024249</a>          | <a href="#">72055</a>     | solute carrier family 38, memb | <a href="#">Slc38a10</a>           | 0.95 | -0.82  | 0.4387   | 0.697907 |
| 12777 | 10579799 | <a href="#">NM_145599</a>          | <a href="#">234463</a>    | transmembrane protein 34       | <a href="#">Tmem34</a>             | 0.95 | -1.261 | 0.246686 | 0.519877 |
| 12778 | 10585022 | <a href="#">NM_011752</a>          | <a href="#">22687</a>     | zinc finger protein 259        | <a href="#">Zfp259</a>             | 0.95 | -1.273 | 0.242678 | 0.515498 |
| 12779 | 10459755 | <a href="#">BC019940</a>           | <a href="#">66468</a>     | RIKEN cDNA 2810433K01 gene     | <a href="#">2810433K01Rik</a>      | 0.95 | -1.045 | 0.32978  | 0.606148 |
| 12780 | 10458046 | <a href="#">NM_053078</a>          | <a href="#">27528</a>     | DNA segment, human D4S114      | <a href="#">D0H4S114</a>           | 0.95 | -1.291 | 0.236593 | 0.508732 |
| 12781 | 10552874 | <a href="#">NM_011565</a>          | <a href="#">21677</a>     | TEA domain family member 2     | <a href="#">Tead2</a>              | 0.95 | -1.569 | 0.159469 | 0.406781 |
| 12782 | 10595404 | <a href="#">ENSMUST00000034802</a> | <a href="#">212943</a>    | cDNA sequence BC023892         | <a href="#">BC023892</a>           | 0.95 | -0.988 | 0.355034 | 0.627756 |
| 12783 | 10569719 | <a href="#">NM_001033378</a>       | <a href="#">319493</a>    | RIKEN cDNA A430078G23 gene     | <a href="#">A430078G23Rik</a>      | 0.95 | -0.601 | 0.566088 | 0.792149 |
| 12784 | 10480912 | <a href="#">NM_001039653</a>       | <a href="#">16871</a>     | LIM homeobox protein 3         | <a href="#">Lhx3</a>               | 0.95 | -0.759 | 0.472134 | 0.723934 |
| 12785 | 10421214 | <a href="#">NM_153514</a>          | <a href="#">246710</a>    | Rho-related BTB domain contain | <a href="#">Rhobtb2</a>            | 0.95 | -1.284 | 0.239008 | 0.511774 |
| 12786 | 10490955 | <a href="#">NM_026182</a>          | <a href="#">67472</a>     | mitochondrial fission regulato | <a href="#">Mifn1</a>              | 0.95 | -1.219 | 0.261187 | 0.535753 |
| 12787 | 10468344 | <a href="#">NM_007732</a>          | <a href="#">12821</a>     | collagen, type XVII, alpha 1   | <a href="#">Col17a1</a>            | 0.95 | -0.668 | 0.525132 | 0.761393 |
| 12788 | 10517901 | <a href="#">NM_024412</a>          | <a href="#">12733</a>     | chloride channel Ka            | <a href="#">Clenka</a>             | 0.95 | -0.914 | 0.390302 | 0.658911 |
| 12789 | 10565567 | <a href="#">ENSMUST00000098305</a> | <a href="#">666737</a>    | RIKEN cDNA 4632427E13 gene     | <a href="#">4632427E13Rik</a>      | 0.95 | -0.857 | 0.419033 | 0.681474 |
| 12790 | 10426704 | <a href="#">NM_010601</a>          | <a href="#">16512</a>     | potassium voltage-gated channe | <a href="#">Kenh3</a>              | 0.95 | -0.586 | 0.575816 | 0.797128 |
| 12791 | 10526153 | <a href="#">NM_001015876</a>       | <a href="#">100929</a>    | tRNA-yW synthesizing protein 1 | <a href="#">Tyw1</a>               | 0.95 | -1.167 | 0.280199 | 0.555564 |
| 12792 | 10505465 | <a href="#">BC023748</a>           | <a href="#">230279</a>    | RIKEN cDNA 6330416G13 gene     | <a href="#">6330416G13Rik</a>      | 0.95 | -0.792 | 0.453652 | 0.710123 |
| 12793 | 10526452 | <a href="#">BC115564</a>           | <a href="#">69665</a>     | RIKEN cDNA 2310043J07 gene     | <a href="#">2310043J07Rik</a>      | 0.95 | -0.891 | 0.401916 | 0.667094 |
| 12794 | 10547202 |                                    |                           |                                |                                    | 0.95 | -0.596 | 0.569702 | 0.794081 |
| 12795 | 10542036 | <a href="#">ENSMUST00000100929</a> | <a href="#">100038603</a> | predicted gene, ENSMUSG0000007 | <a href="#">ENSMUSG00000072756</a> | 0.95 | -0.531 | 0.611608 | 0.819829 |
| 12796 | 10399038 | <a href="#">NM_001004066</a>       | <a href="#">56220</a>     | zinc finger protein 386 (Krupp | <a href="#">Zfp386</a>             | 0.95 | -1.305 | 0.232035 | 0.502782 |
| 12797 | 10499751 | <a href="#">NM_030080</a>          | <a href="#">78284</a>     | cAMP responsive element bindin | <a href="#">Creb3l4</a>            | 0.95 | -0.921 | 0.386961 | 0.655969 |
| 12798 | 10428728 | <a href="#">ENSMUST00000050155</a> | <a href="#">319829</a>    | RIKEN cDNA 9330154K18 gene     | <a href="#">9330154K18Rik</a>      | 0.95 | -0.692 | 0.510666 | 0.751917 |
| 12799 | 10517345 | <a href="#">NM_016799</a>          | <a href="#">51796</a>     | serine/arginine repetitive mat | <a href="#">Srrm1</a>              | 0.95 | -1.374 | 0.210511 | 0.475962 |
| 12800 | 10350123 | <a href="#">NM_053106</a>          | <a href="#">93689</a>     | leiomodulin 1 (smooth muscle)  | <a href="#">Lmod1</a>              | 0.95 | -0.294 | 0.776677 | 0.908994 |
| 12801 | 10363007 | <a href="#">BC059917</a>           | <a href="#">77987</a>     | activating signal cointegrator | <a href="#">Ascc3</a>              | 0.95 | -1.233 | 0.256132 | 0.53053  |
| 12802 | 10382816 | <a href="#">NM_009591</a>          | <a href="#">11298</a>     | arylalkylamine N-acetyltransfe | <a href="#">Aanat</a>              | 0.95 | -0.097 | 0.925221 | 0.970428 |
| 12803 | 10461715 | <a href="#">NM_146683</a>          | <a href="#">258678</a>    | olfactory receptor 1441        | <a href="#">Olf1441</a>            | 0.95 | -0.632 | 0.546871 | 0.778024 |
| 12804 | 10490736 | <a href="#">NM_026446</a>          | <a href="#">56470</a>     | regulator of G-protein signali | <a href="#">Rgs19</a>              | 0.95 | -1.199 | 0.268491 | 0.542836 |
| 12805 | 10393898 | <a href="#">BC091000</a>           | <a href="#">68515</a>     | RIKEN cDNA 1110012N22 gene     | <a href="#">1110012N22Rik</a>      | 0.95 | -0.729 | 0.488734 | 0.736349 |
| 12806 | 10399943 | <a href="#">NM_001024478</a>       | <a href="#">68764</a>     | RIKEN cDNA 1110049B09 gene     | <a href="#">1110049B09Rik</a>      | 0.95 | -0.354 | 0.733776 | 0.886114 |
| 12807 | 10426689 | <a href="#">NM_139140</a>          | <a href="#">72572</a>     | spermatogenesis associated, se | <a href="#">Spats2</a>             | 0.95 | -0.968 | 0.364332 | 0.635557 |
| 12808 | 10550062 | <a href="#">NM_178732</a>          | <a href="#">243834</a>    | zinc finger protein 324        | <a href="#">Zfp324</a>             | 0.95 | -1.465 | 0.18509  | 0.442657 |
| 12809 | 10508707 | <a href="#">ENSMUST00000094666</a> | <a href="#">623230</a>    | transmembrane protein 200B     | <a href="#">Tmem200b</a>           | 0.95 | -0.985 | 0.356408 | 0.628882 |

|       |          |                                    |                           |                                   |                                    |       |        |          |          |
|-------|----------|------------------------------------|---------------------------|-----------------------------------|------------------------------------|-------|--------|----------|----------|
| 12810 | 10392803 | <a href="#">NM_199225</a>          | <a href="#">387565</a>    | CD300C antigen                    | <a href="#">Cd300c</a>             | 0.95  | -0.37  | 0.722349 | 0.879243 |
| 12811 | 10498837 | <a href="#">NM_025794</a>          | <a href="#">66841</a>     | electron transferring flavopro    | <a href="#">Etfdh</a>              | 0.95  | -1.344 | 0.21954  | 0.48837  |
| 12812 | 10549770 | <a href="#">NM_133671</a>          | <a href="#">22185</a>     | U2 small nuclear ribonucleopro    | <a href="#">U2af2</a>              | 0.95  | -0.914 | 0.390336 | 0.658911 |
| 12813 | 10482121 | <a href="#">NM_206903</a>          | <a href="#">18328</a>     | olfactory receptor 3              | <a href="#">Olf3</a>               | 0.95  | -0.496 | 0.634559 | 0.833879 |
| 12814 | 10470913 | <a href="#">NM_153805</a>          | <a href="#">263803</a>    | protein kinase N3                 | <a href="#">Pkn3</a>               | 0.95  | -0.716 | 0.496377 | 0.740946 |
| 12815 | 10572804 | <a href="#">BC008558</a>           | <a href="#">72254</a>     | RIKEN cDNA 1700030K09<br>gene     | <a href="#">1700030K09Rik</a>      | 0.95  | -0.647 | 0.537895 | 0.770912 |
| 12816 | 10499093 |                                    |                           |                                   |                                    | 0.95  | -1.033 | 0.334914 | 0.610467 |
| 12817 | 10499655 | <a href="#">NM_010559</a>          | <a href="#">16194</a>     | interleukin 6 receptor, alpha     | <a href="#">Il6ra</a>              | 0.95  | -0.842 | 0.426812 | 0.688211 |
| 12818 | 10443852 |                                    |                           |                                   |                                    | 0.949 | -0.352 | 0.735136 | 0.886784 |
| 12819 | 10457844 | <a href="#">NM_021559</a>          | <a href="#">59057</a>     | zinc finger protein 191           | <a href="#">Zfp191</a>             | 0.949 | -1.224 | 0.259489 | 0.533772 |
| 12820 | 10507347 | <a href="#">NM_146151</a>          | <a href="#">230661</a>    | testis-specific kinase 2          | <a href="#">Tek2</a>               | 0.949 | -0.589 | 0.5736   | 0.796812 |
| 12821 | 10370818 | <a href="#">NM_198615</a>          | <a href="#">237400</a>    | mex3 homolog D (C. elegans)       | <a href="#">Mex3d</a>              | 0.949 | -0.811 | 0.443512 | 0.702308 |
| 12822 | 10448214 | <a href="#">NM_176962</a>          | <a href="#">319615</a>    | RIKEN cDNA 6330416L07 gene        | <a href="#">6330416L07Rik</a>      | 0.949 | -1.601 | 0.152046 | 0.395822 |
| 12823 | 10566502 | <a href="#">NM_029802</a>          | <a href="#">76932</a>     | ADP-ribosylation factor intera    | <a href="#">Arfp2</a>              | 0.949 | -1.587 | 0.155325 | 0.400794 |
| 12824 | 10472942 | <a href="#">ENSMUST00000100005</a> | <a href="#">100038532</a> | predicted gene,<br>ENSMUSG0000007 | <a href="#">ENSMUSG00000075281</a> | 0.949 | -0.679 | 0.518038 | 0.756834 |
| 12825 | 10593646 | <a href="#">NM_001033535</a>       | <a href="#">244882</a>    | tumor necrosis factor, alpha-i    | <a href="#">Tnfaip8l3</a>          | 0.949 | -1.07  | 0.318967 | 0.596119 |
| 12826 | 10390022 | <a href="#">NM_001013381</a>       | <a href="#">237926</a>    | radical S-adenosyl methionine     | <a href="#">Rsad1</a>              | 0.949 | -0.181 | 0.861229 | 0.944248 |
| 12827 | 10434733 | <a href="#">NM_013506</a>          | <a href="#">13682</a>     | eukaryotic translation initiat    | <a href="#">Eif4a2</a>             | 0.949 | -0.935 | 0.380036 | 0.6497   |
| 12828 | 10441657 | <a href="#">NM_178774</a>          | <a href="#">320111</a>    | proline rich region 18            | <a href="#">Ptr18</a>              | 0.949 | -0.612 | 0.559471 | 0.786846 |
| 12829 | 10586140 | <a href="#">NM_145835</a>          | <a href="#">235435</a>    | lactase-like                      | <a href="#">Lctl</a>               | 0.949 | -0.082 | 0.936516 | 0.975144 |
| 12830 | 10584095 | <a href="#">NM_172766</a>          | <a href="#">235134</a>    | nuclear factor related to kapp    | <a href="#">Nfrkb</a>              | 0.949 | -1.007 | 0.346347 | 0.620403 |
| 12831 | 10382795 | <a href="#">XR_034731</a>          | <a href="#">668255</a>    | similar to ribosomal protein S    | <a href="#">LOC668255</a>          | 0.949 | -1.128 | 0.295332 | 0.571726 |
| 12832 | 10586405 | <a href="#">NM_138584</a>          | <a href="#">27965</a>     | spastic paraplegia 21 homolog     | <a href="#">Spg21</a>              | 0.949 | -1.394 | 0.204731 | 0.468184 |
| 12833 | 10446656 | <a href="#">NM_022882</a>          | <a href="#">64898</a>     | lipin 2                           | <a href="#">Lpin2</a>              | 0.949 | -1.284 | 0.238879 | 0.511686 |
| 12834 | 10600144 | <a href="#">NM_007978</a>          | <a href="#">14070</a>     | factor 8-associated gene A        | <a href="#">F8a</a>                | 0.949 | -1.009 | 0.34578  | 0.619959 |
| 12835 | 10382393 | <a href="#">NM_001034878</a>       | <a href="#">432611</a>    | dynein, axonemal, intermediate    | <a href="#">Dnaic2</a>             | 0.949 | -0.68  | 0.518009 | 0.756834 |
| 12836 | 10413148 | <a href="#">AK046931</a>           | <a href="#">319486</a>    | RIKEN cDNA A430057M04<br>gene     | <a href="#">A430057M04Rik</a>      | 0.949 | -0.568 | 0.587435 | 0.804278 |
| 12837 | 10454950 | <a href="#">NM_026404</a>          | <a href="#">67843</a>     | solute carrier family 35, memb    | <a href="#">Slc35a4</a>            | 0.949 | -1.104 | 0.305218 | 0.581633 |
| 12838 | 10506680 | <a href="#">NM_028355</a>          | <a href="#">72787</a>     | transmembrane protein 48          | <a href="#">Tmem48</a>             | 0.949 | -0.793 | 0.453333 | 0.709863 |
| 12839 | 10600180 | <a href="#">NM_177236</a>          | <a href="#">320707</a>    | ATPase, Ca++ transporting, pla    | <a href="#">Atp2b3</a>             | 0.949 | -0.325 | 0.754412 | 0.896694 |
| 12840 | 10460139 |                                    |                           |                                   |                                    | 0.949 | -0.891 | 0.401872 | 0.667094 |
| 12841 | 10430436 | <a href="#">ENSMUST00000100464</a> | <a href="#">100038602</a> | predicted gene,<br>ENSMUSG0000007 | <a href="#">ENSMUSG00000075558</a> | 0.949 | -0.741 | 0.482159 | 0.730954 |
| 12842 | 10461906 |                                    |                           |                                   |                                    | 0.949 | -0.894 | 0.400047 | 0.665979 |
| 12843 | 10418838 | <a href="#">ENSMUST00000051440</a> | <a href="#">320321</a>    | RIKEN cDNA 9430077A04<br>gene     | <a href="#">9430077A04Rik</a>      | 0.949 | -0.834 | 0.431127 | 0.691741 |
| 12844 | 10489589 | <a href="#">BC037706</a>           | <a href="#">74886</a>     | RIKEN cDNA 4930445K14<br>gene     | <a href="#">4930445K14Rik</a>      | 0.949 | -0.782 | 0.458892 | 0.713797 |
| 12845 | 10603805 |                                    |                           |                                   |                                    | 0.949 | -0.456 | 0.661493 | 0.849255 |
| 12846 | 10549588 | <a href="#">NM_029767</a>          | <a href="#">76846</a>     | ribosomal protein S9              | <a href="#">Rps9</a>               | 0.949 | -1.315 | 0.228673 | 0.499748 |
| 12847 | 10364696 | <a href="#">NM_025313</a>          | <a href="#">66043</a>     | ATP synthase, H+ transporting,    | <a href="#">Atp5d</a>              | 0.949 | -1.829 | 0.108827 | 0.325602 |
| 12848 | 10401781 | <a href="#">NM_011479</a>          | <a href="#">20773</a>     | serine palmitoyltransferase, l    | <a href="#">Sptlc2</a>             | 0.949 | -1.205 | 0.266366 | 0.541183 |
| 12849 | 10464813 | <a href="#">NM_009032</a>          | <a href="#">19653</a>     | RNA binding motif protein 4       | <a href="#">Rbm4</a>               | 0.949 | -1.14  | 0.290818 | 0.567038 |
| 12850 | 10397780 |                                    |                           |                                   |                                    | 0.949 | -1.107 | 0.303966 | 0.580269 |
| 12851 | 10473180 | <a href="#">NM_172420</a>          | <a href="#">75276</a>     | protein phosphatase 1, regulat    | <a href="#">Ppp1r1c</a>            | 0.949 | -0.934 | 0.380729 | 0.650316 |
| 12852 | 10447349 | <a href="#">NM_019936</a>          | <a href="#">56724</a>     | cysteine-rich PDZ-binding prot    | <a href="#">Cript</a>              | 0.949 | -1.397 | 0.203752 | 0.466884 |
| 12853 | 10443690 | <a href="#">NM_021332</a>          | <a href="#">14652</a>     | glucagon-like peptide 1 recept    | <a href="#">Glp1r</a>              | 0.949 | -0.751 | 0.476157 | 0.727414 |
| 12854 | 10526213 |                                    |                           |                                   |                                    | 0.949 | -0.777 | 0.461774 | 0.716395 |
| 12855 | 10446214 | <a href="#">NM_025538</a>          | <a href="#">66400</a>     | alkB, alkylation repair homolo    | <a href="#">Alkbh7</a>             | 0.949 | -0.849 | 0.4233   | 0.685528 |
| 12856 | 10404402 | <a href="#">NM_008239</a>          | <a href="#">15220</a>     | forkhead box Q1                   | <a href="#">Foxq1</a>              | 0.949 | -0.458 | 0.660403 | 0.848652 |
| 12857 | 10390256 | <a href="#">ENSMUST00000100522</a> | <a href="#">100038600</a> | predicted gene,<br>OTTMUSG0000000 | <a href="#">OTTMUSG00000001775</a> | 0.949 | -0.08  | 0.938116 | 0.975903 |
| 12858 | 10364971 | <a href="#">NM_023138</a>          | <a href="#">26396</a>     | mitogen-activated protein kina    | <a href="#">Map2k2</a>             | 0.949 | -1.711 | 0.129511 | 0.360884 |
| 12859 | 10458960 | <a href="#">NM_138600</a>          | <a href="#">110695</a>    | aldehyde dehydrogenase family     | <a href="#">Aldh7a1</a>            | 0.949 | -1.421 | 0.19715  | 0.457903 |
| 12860 | 10508676 | <a href="#">NM_010769</a>          | <a href="#">17180</a>     | matrilin 1, cartilage matrix p    | <a href="#">Matn1</a>              | 0.949 | -0.468 | 0.653342 | 0.844695 |
| 12861 | 10580077 | <a href="#">NM_173184</a>          | <a href="#">212108</a>    | relaxin 3                         | <a href="#">Rln3</a>               | 0.949 | -0.529 | 0.612641 | 0.820438 |

|       |          |                                    |                        |                                 |                               |       |        |          |          |
|-------|----------|------------------------------------|------------------------|---------------------------------|-------------------------------|-------|--------|----------|----------|
| 12862 | 10562005 | <a href="#">NM_029274</a>          | <a href="#">75410</a>  | WW domain binding protein 7     | <a href="#">Wbp7</a>          | 0.949 | -1.257 | 0.248019 | 0.521387 |
| 12863 | 10557808 | <a href="#">NM_172749</a>          | <a href="#">233905</a> | zinc finger protein 646         | <a href="#">Zfp646</a>        | 0.949 | -1.02  | 0.340563 | 0.615722 |
| 12864 | 10429491 | <a href="#">NM_018790</a>          | <a href="#">11838</a>  | activity regulated cytoskeleta  | <a href="#">Arc</a>           | 0.949 | -0.77  | 0.465753 | 0.719391 |
| 12865 | 10459770 |                                    |                        |                                 |                               | 0.949 | -1.302 | 0.232964 | 0.50397  |
| 12866 | 10472549 | <a href="#">NM_028284</a>          | <a href="#">72569</a>  | Bardet-Biedl syndrome 5 (human) | <a href="#">Bbs5</a>          | 0.949 | -0.96  | 0.368247 | 0.639105 |
| 12867 | 10588720 |                                    |                        |                                 |                               | 0.949 | -1.162 | 0.282205 | 0.557189 |
| 12868 | 10438347 | <a href="#">NM_011532</a>          | <a href="#">21380</a>  | T-box 1                         | <a href="#">Tbx1</a>          | 0.949 | -0.541 | 0.604933 | 0.815765 |
| 12869 | 10349980 | <a href="#">NM_016749</a>          | <a href="#">53311</a>  | myosin binding protein H        | <a href="#">Mybph</a>         | 0.949 | -0.14  | 0.89252  | 0.957747 |
| 12870 | 10388758 | <a href="#">NM_080849</a>          | <a href="#">140859</a> | NIMA (never in mitosis gene a)  | <a href="#">Nek8</a>          | 0.949 | -0.689 | 0.512348 | 0.75282  |
| 12871 | 10391277 | <a href="#">NM_031871</a>          | <a href="#">80860</a>  | GH3 domain containing           | <a href="#">Ghdc</a>          | 0.949 | -0.873 | 0.41089  | 0.675081 |
| 12872 | 10529581 | <a href="#">NM_026242</a>          | <a href="#">67568</a>  | Morf4 family associated protei  | <a href="#">Mrfap1</a>        | 0.949 | -0.86  | 0.417304 | 0.680204 |
| 12873 | 10513103 | <a href="#">ENSMUST00000053681</a> | <a href="#">230235</a> | RIKEN cDNA 6430704M03 gene      | <a href="#">6430704M03Rik</a> | 0.949 | -0.729 | 0.489193 | 0.736349 |
| 12874 | 10352119 | <a href="#">NM_024282</a>          | <a href="#">78825</a>  | RIKEN cDNA 5830417C01 gene      | <a href="#">5830417C01Rik</a> | 0.949 | -1.294 | 0.23557  | 0.50735  |
| 12875 | 10605629 |                                    |                        |                                 |                               | 0.949 | -0.689 | 0.512126 | 0.752651 |
| 12876 | 10508182 | <a href="#">NM_011970</a>          | <a href="#">26445</a>  | proteasome (prosome, macropain  | <a href="#">Psm2</a>          | 0.949 | -1.522 | 0.170617 | 0.422304 |
| 12877 | 10573430 | <a href="#">NM_183358</a>          | <a href="#">102060</a> | growth arrest and DNA-damage-i  | <a href="#">Gadd45gip1</a>    | 0.949 | -1.456 | 0.187407 | 0.445729 |
| 12878 | 10598025 |                                    |                        |                                 |                               | 0.949 | -1.274 | 0.242065 | 0.514861 |
| 12879 | 10510532 | <a href="#">NM_001085529</a>       | <a href="#">435818</a> | solute carrier family 2 (facil  | <a href="#">Slc2a7</a>        | 0.949 | -0.362 | 0.727443 | 0.881863 |
| 12880 | 10564436 | <a href="#">NR_003961</a>          | <a href="#">117589</a> | ankyrin repeat and SOCS box-co  | <a href="#">Asb7</a>          | 0.949 | -1.444 | 0.190844 | 0.449855 |
| 12881 | 10346914 | <a href="#">NM_172422</a>          | <a href="#">75619</a>  | FAST kinase domains 2           | <a href="#">Fastkd2</a>       | 0.949 | -0.97  | 0.363416 | 0.634688 |
| 12882 | 10512451 | <a href="#">BC046771</a>           | <a href="#">230088</a> | RIKEN cDNA B230312A22 gene      | <a href="#">B230312A22Rik</a> | 0.949 | -0.503 | 0.629981 | 0.831325 |
| 12883 | 10472605 | <a href="#">NM_009278</a>          | <a href="#">20823</a>  | Sjogren syndrome antigen B      | <a href="#">Ssb</a>           | 0.949 | -1.258 | 0.247637 | 0.520853 |
| 12884 | 10502442 | <a href="#">XM_001473461</a>       | <a href="#">621343</a> | similar to zinc finger, CCHC d  | <a href="#">LOC621343</a>     | 0.949 | -0.37  | 0.722186 | 0.879197 |
| 12885 | 10355117 | <a href="#">NM_001081658</a>       | <a href="#">241073</a> | dystrotelin                     | <a href="#">Dytn</a>          | 0.949 | -0.891 | 0.401575 | 0.666842 |
| 12886 | 10541644 | <a href="#">NM_053094</a>          | <a href="#">93671</a>  | CD163 antigen                   | <a href="#">Cd163</a>         | 0.949 | -0.574 | 0.58366  | 0.801548 |
| 12887 | 10362156 | <a href="#">NM_001009574</a>       | <a href="#">215854</a> | trace amine-associated recepto  | <a href="#">Taar5</a>         | 0.949 | -0.484 | 0.642473 | 0.838098 |
| 12888 | 10567987 | <a href="#">NM_145636</a>          | <a href="#">246779</a> | interleukin 27                  | <a href="#">Il27</a>          | 0.949 | -0.55  | 0.598791 | 0.811696 |
| 12889 | 10521111 | <a href="#">NM_008010</a>          | <a href="#">14184</a>  | fibroblast growth factor recep  | <a href="#">Fgfr3</a>         | 0.948 | -1.207 | 0.265598 | 0.540607 |
| 12890 | 10385681 | <a href="#">BC049762</a>           | <a href="#">193286</a> | cDNA sequence BC049762          | <a href="#">BC049762</a>      | 0.948 | -0.679 | 0.518378 | 0.756999 |
| 12891 | 10352396 | <a href="#">NM_173378</a>          | <a href="#">209456</a> | transformation related protein  | <a href="#">Trp53bp2</a>      | 0.948 | -1.709 | 0.129926 | 0.361535 |
| 12892 | 10486262 | <a href="#">NM_203345</a>          | <a href="#">17005</a>  | leukocyte tyrosine kinase       | <a href="#">Ltk</a>           | 0.948 | -0.65  | 0.535883 | 0.769279 |
| 12893 | 10409575 | <a href="#">NM_010896</a>          | <a href="#">18014</a>  | neurogenin 1                    | <a href="#">Neurog1</a>       | 0.948 | -0.589 | 0.573831 | 0.797007 |
| 12894 | 10395849 | <a href="#">NM_011041</a>          | <a href="#">18511</a>  | paired box gene 9               | <a href="#">Pax9</a>          | 0.948 | -0.711 | 0.499273 | 0.742535 |
| 12895 | 10538356 | <a href="#">NM_023543</a>          | <a href="#">69993</a>  | chimerin (chimaerin) 2          | <a href="#">Chn2</a>          | 0.948 | -0.49  | 0.638578 | 0.835923 |
| 12896 | 10570837 | <a href="#">NM_011394</a>          | <a href="#">20516</a>  | solute carrier family 20, memb  | <a href="#">Slc20a2</a>       | 0.948 | -0.96  | 0.367932 | 0.638955 |
| 12897 | 10481366 |                                    |                        |                                 |                               | 0.948 | -0.588 | 0.574536 | 0.797076 |
| 12898 | 10584481 | <a href="#">XR_033953</a>          | <a href="#">667260</a> | similar to gamma actin-like pr  | <a href="#">LOC667260</a>     | 0.948 | -0.72  | 0.494372 | 0.739567 |
| 12899 | 10605782 |                                    |                        |                                 |                               | 0.948 | -1.31  | 0.230324 | 0.501285 |
| 12900 | 10581491 | <a href="#">ENSMUST00000088866</a> | <a href="#">68163</a>  | RIKEN cDNA A930006D01 gene      | <a href="#">A930006D01Rik</a> | 0.948 | -0.824 | 0.436364 | 0.696296 |
| 12901 | 10598586 | <a href="#">NM_023500</a>          | <a href="#">22439</a>  | Kell blood group precursor (Mc  | <a href="#">Xk</a>            | 0.948 | -1.036 | 0.333483 | 0.609432 |
| 12902 | 10470628 | <a href="#">NM_001033294</a>       | <a href="#">227674</a> | DEAD/H (Asp-Glu-Ala-Asp/His) b  | <a href="#">Ddx31</a>         | 0.948 | -0.827 | 0.434906 | 0.695306 |
| 12903 | 10524248 | <a href="#">NM_027156</a>          | <a href="#">69663</a>  | DEAD (Asp-Glu-Ala-Asp) box pol  | <a href="#">Ddx51</a>         | 0.948 | -0.872 | 0.411346 | 0.675346 |
| 12904 | 10514806 | <a href="#">NM_080458</a>          | <a href="#">140475</a> | Bartter syndrome, infantile, w  | <a href="#">Bsnd</a>          | 0.948 | -0.65  | 0.536095 | 0.769315 |
| 12905 | 10510025 | <a href="#">NM_001081408</a>       | <a href="#">75986</a>  | agmatine ureohydrolase (agmati  | <a href="#">Agmat</a>         | 0.948 | -0.496 | 0.6344   | 0.833748 |
| 12906 | 10371321 | <a href="#">NM_177388</a>          | <a href="#">338365</a> | solute carrier family 41, memb  | <a href="#">Slc41a2</a>       | 0.948 | -0.767 | 0.467276 | 0.72007  |
| 12907 | 10475113 | <a href="#">NM_145378</a>          | <a href="#">211429</a> | phospholipase A2, group IVB (c  | <a href="#">Pla2g4b</a>       | 0.948 | -1.383 | 0.2079   | 0.472478 |
| 12908 | 10437580 | <a href="#">ENSMUST00000058298</a> | <a href="#">268860</a> | 4-aminobutyrate aminotransfera  | <a href="#">Abat</a>          | 0.948 | -0.512 | 0.623625 | 0.828031 |
| 12909 | 10473221 | <a href="#">XR_032728</a>          | <a href="#">624223</a> | similar to ribosomal protein L  | <a href="#">LOC624223</a>     | 0.948 | -0.149 | 0.886    | 0.955356 |
| 12910 | 10463389 | <a href="#">NM_011037</a>          | <a href="#">18504</a>  | paired box gene 2               | <a href="#">Pax2</a>          | 0.948 | -1.036 | 0.333766 | 0.609432 |
| 12911 | 10414693 | <a href="#">NM_023434</a>          | <a href="#">268741</a> | TOX high mobility group box fa  | <a href="#">Tox4</a>          | 0.948 | -1.09  | 0.310617 | 0.587176 |
| 12912 | 10345393 | <a href="#">NM_007685</a>          | <a href="#">12627</a>  | cripto, FRL-1, cryptic family   | <a href="#">Cfc1</a>          | 0.948 | -0.174 | 0.866754 | 0.946802 |

|       |          |                                    |                           |                                    |                                    |       |        |           |          |
|-------|----------|------------------------------------|---------------------------|------------------------------------|------------------------------------|-------|--------|-----------|----------|
| 12913 | 10579845 | <a href="#">ENSMUST00000034109</a> | <a href="#">67687</a>     | RIKEN cDNA 1700011L22 gene         | <a href="#">1700011L22Rik</a>      | 0.948 | 0.019  | 0.985     | 0.993647 |
| 12914 | 10468307 | <a href="#">ENSMUST00000116052</a> | <a href="#">629389</a>    | predicted gene, EG629389           | <a href="#">EG629389</a>           | 0.948 | -0.89  | 0.401968  | 0.667128 |
| 12915 | 10580370 | <a href="#">NM_019794</a>          | <a href="#">56445</a>     | DnaJ (Hsp40) homolog, subfamil     | <a href="#">Dnaja2</a>             | 0.948 | -1.329 | 0.224275  | 0.494263 |
| 12916 | 10432101 | <a href="#">NM_144851</a>          | <a href="#">223870</a>    | SUMO1/sentrin specific peptida     | <a href="#">Senp1</a>              | 0.948 | -1.278 | 0.240686  | 0.513714 |
| 12917 | 10360912 | <a href="#">XR_033455</a>          | <a href="#">677785</a>    | similar to CDK105                  | <a href="#">LOC677785</a>          | 0.948 | -1.163 | 0.281692  | 0.556928 |
| 12918 | 10463844 | <a href="#">NM_026619</a>          | <a href="#">68214</a>     | glutathione S-transferase omeg     | <a href="#">Gsto2</a>              | 0.948 | -0.72  | 0.494063  | 0.739456 |
| 12919 | 10576160 | <a href="#">NM_144932</a>          | <a href="#">257633</a>    | acyl-CoA synthetase family mem     | <a href="#">Acsf3</a>              | 0.948 | -1.14  | 0.290754  | 0.567035 |
| 12920 | 10456754 | <a href="#">ENSMUST00000097524</a> | <a href="#">100038353</a> | predicted gene,<br>ENSMUSG0000007  | <a href="#">ENSMUSG00000073534</a> | 0.948 | -1.062 | 0.322634  | 0.599294 |
| 12921 | 10396108 | <a href="#">NM_007481</a>          | <a href="#">11845</a>     | ADP-ribosylation factor 6          | <a href="#">Arf6</a>               | 0.948 | -1.279 | 0.240503  | 0.513583 |
| 12922 | 10387983 |                                    |                           |                                    |                                    | 0.948 | -1.188 | 0.272635  | 0.547117 |
| 12923 | 10360076 | <a href="#">NM_153064</a>          | <a href="#">226646</a>    | NADH dehydrogenase<br>(ubiquinone) | <a href="#">Ndufs2</a>             | 0.948 | -1.494 | 0.177702  | 0.43217  |
| 12924 | 10454310 | <a href="#">NM_013814</a>          | <a href="#">14423</a>     | UDP-N-acetyl-alpha-D-galactosa     | <a href="#">Galnt1</a>             | 0.948 | -1.137 | 0.291843  | 0.567841 |
| 12925 | 10503150 | <a href="#">NM_021518</a>          | <a href="#">59021</a>     | RAB2A, member RAS oncogene<br>fam  | <a href="#">Rab2a</a>              | 0.948 | -1.066 | 0.320771  | 0.597672 |
| 12926 | 10570344 | <a href="#">NM_010684</a>          | <a href="#">16783</a>     | lysosomal-associated membrane      | <a href="#">Lamp1</a>              | 0.948 | -1.894 | 0.0989054 | 0.307086 |
| 12927 | 10450272 | <a href="#">NM_009995</a>          | <a href="#">13079</a>     | cytochrome P450, family 21, su     | <a href="#">Cyp21a1</a>            | 0.948 | -0.183 | 0.859548  | 0.943578 |
| 12928 | 10358757 | <a href="#">NM_001005507</a>       | <a href="#">226517</a>    | Smg-7 homolog, nonsense<br>mediat  | <a href="#">Smg7</a>               | 0.948 | -1.233 | 0.256286  | 0.530714 |
| 12929 | 10555758 | <a href="#">NM_147053</a>          | <a href="#">259055</a>    | olfactory receptor 582             | <a href="#">Olfr582</a>            | 0.948 | -0.006 | 0.995747  | 0.998271 |
| 12930 | 10439976 | <a href="#">BC017620</a>           | <a href="#">66391</a>     | RIKEN cDNA 2310061J03 gene         | <a href="#">2310061J03Rik</a>      | 0.948 | -0.95  | 0.372891  | 0.643306 |
| 12931 | 10517825 | <a href="#">NM_011059</a>          | <a href="#">18599</a>     | peptidyl arginine deiminase, t     | <a href="#">Padi1</a>              | 0.948 | -0.577 | 0.581693  | 0.800424 |
| 12932 | 10521495 | <a href="#">ENSMUST00000094840</a> | <a href="#">381634</a>    | gene model 1043, (NCBI)            | <a href="#">Gm1043</a>             | 0.948 | -0.205 | 0.842957  | 0.936353 |
| 12933 | 10580286 | <a href="#">NM_145388</a>          | <a href="#">212989</a>    | bestrophin 2                       | <a href="#">Best2</a>              | 0.948 | -0.594 | 0.570655  | 0.795023 |
| 12934 | 10432045 | <a href="#">NM_031163</a>          | <a href="#">12824</a>     | collagen, type II, alpha 1         | <a href="#">Col2a1</a>             | 0.948 | -0.938 | 0.378638  | 0.648305 |
| 12935 | 10357705 | <a href="#">NM_177129</a>          | <a href="#">21367</a>     | contactin 2                        | <a href="#">Ctnn2</a>              | 0.948 | -0.808 | 0.444657  | 0.703151 |
| 12936 | 10374744 |                                    |                           |                                    |                                    | 0.948 | -0.227 | 0.826621  | 0.930428 |
| 12937 | 10590438 | <a href="#">BC113767</a>           | <a href="#">245050</a>    | RIKEN cDNA C730027P07<br>gene      | <a href="#">C730027P07Rik</a>      | 0.948 | -0.173 | 0.86728   | 0.946934 |
| 12938 | 10433614 | <a href="#">ENSMUST00000068397</a> | <a href="#">791359</a>    | predicted gene,<br>ENSMUSG0000005  | <a href="#">ENSMUSG00000055015</a> | 0.948 | -0.021 | 0.983963  | 0.993077 |
| 12939 | 10419343 | <a href="#">BC090995</a>           | <a href="#">218978</a>    | DNA segment, Chr 14, ERATO<br>Doi  | <a href="#">D14Ert436e</a>         | 0.948 | -0.887 | 0.403532  | 0.668494 |
| 12940 | 10605606 | <a href="#">NM_001101541</a>       | <a href="#">436212</a>    | predicted gene, EG436212           | <a href="#">EG436212</a>           | 0.948 | -0.555 | 0.59586   | 0.809631 |
| 12941 | 10481329 | <a href="#">NM_019446</a>          | <a href="#">54422</a>     | BarH-like 1 (Drosophila)           | <a href="#">Barhl1</a>             | 0.948 | -0.63  | 0.547843  | 0.778543 |
| 12942 | 10588028 | <a href="#">NM_144533</a>          | <a href="#">74080</a>     | nicotinamide nucleotide adenylyl   | <a href="#">Nmnat3</a>             | 0.948 | -0.648 | 0.537286  | 0.770299 |
| 12943 | 10561063 | <a href="#">NM_007533</a>          | <a href="#">12039</a>     | branched chain ketoacid dehydr     | <a href="#">Bckdha</a>             | 0.948 | -0.58  | 0.579483  | 0.798943 |
| 12944 | 10485068 |                                    |                           |                                    |                                    | 0.947 | -0.313 | 0.763501  | 0.901503 |
| 12945 | 10580905 | <a href="#">BC018281</a>           | <a href="#">234594</a>    | CCR4-NOT transcription<br>complex  | <a href="#">Cnot1</a>              | 0.947 | -1.402 | 0.202316  | 0.465127 |
| 12946 | 10455061 | <a href="#">NM_053129</a>          | <a href="#">93875</a>     | protocadherin beta 4               | <a href="#">Pcdhb4</a>             | 0.947 | -0.429 | 0.680319  | 0.858268 |
| 12947 | 10379363 | <a href="#">NM_001029856</a>       | <a href="#">237877</a>    | ATPase family, AAA domain<br>cont  | <a href="#">Atad5</a>              | 0.947 | -1.041 | 0.331433  | 0.60794  |
| 12948 | 10396177 | <a href="#">NM_019785</a>          | <a href="#">56444</a>     | ARP10 actin-related protein 10     | <a href="#">Actr10</a>             | 0.947 | -1.164 | 0.281421  | 0.55689  |
| 12949 | 10384044 | <a href="#">NM_022879</a>          | <a href="#">17898</a>     | myosin, light polypeptide 7, r     | <a href="#">Myl7</a>               | 0.947 | -1.287 | 0.237967  | 0.510354 |
| 12950 | 10528610 | <a href="#">NM_022418</a>          | <a href="#">64295</a>     | transmembrane and ubiquitin-li     | <a href="#">Tmub1</a>              | 0.947 | -0.465 | 0.655775  | 0.845986 |
| 12951 | 10474041 | <a href="#">ENSMUST00000054316</a> | <a href="#">75641</a>     | RIKEN cDNA 1700029I15 gene         | <a href="#">1700029I15Rik</a>      | 0.947 | -0.664 | 0.527325  | 0.762963 |
| 12952 | 10569291 | <a href="#">NM_027844</a>          | <a href="#">71623</a>     | keratin associated protein 5-2     | <a href="#">Krtap5-2</a>           | 0.947 | -0.291 | 0.779048  | 0.910184 |
| 12953 | 10521389 | <a href="#">AF009367</a>           | <a href="#">15371</a>     | H6 homeo box 1                     | <a href="#">Hmx1</a>               | 0.947 | -1.04  | 0.332073  | 0.608173 |
| 12954 | 10589625 | <a href="#">NM_199471</a>          | <a href="#">272643</a>    | testis serine protease 3           | <a href="#">Tessp3</a>             | 0.947 | -0.322 | 0.756944  | 0.898026 |
| 12955 | 10406461 | <a href="#">ENSMUST00000052354</a> | <a href="#">320203</a>    | RIKEN cDNA C130071C03<br>gene      | <a href="#">C130071C03Rik</a>      | 0.947 | -0.417 | 0.689155  | 0.863496 |
| 12956 | 10352358 | <a href="#">NM_028408</a>          | <a href="#">72978</a>     | cornichon homolog 3 (Drosophil     | <a href="#">Cnih3</a>              | 0.947 | -0.555 | 0.595757  | 0.809631 |
| 12957 | 10444244 | <a href="#">NM_013683</a>          | <a href="#">21354</a>     | transporter 1, ATP-binding cas     | <a href="#">Tap1</a>               | 0.947 | -0.633 | 0.546491  | 0.777695 |
| 12958 | 10355325 | <a href="#">NM_007525</a>          | <a href="#">12021</a>     | BRCA1 associated RING<br>domain 1  | <a href="#">Bard1</a>              | 0.947 | -0.513 | 0.623554  | 0.828011 |
| 12959 | 10361846 | <a href="#">NM_009048</a>          | <a href="#">19707</a>     | RalBP1 associated Eps domain c     | <a href="#">Reps1</a>              | 0.947 | -1.592 | 0.154174  | 0.398904 |
| 12960 | 10453334 | <a href="#">NM_028233</a>          | <a href="#">72416</a>     | leucine-rich PPR-motif contain     | <a href="#">Lrpprc</a>             | 0.947 | -1.33  | 0.223987  | 0.494176 |

|       |          |                                    |                        |                                |                                    |       |        |          |          |
|-------|----------|------------------------------------|------------------------|--------------------------------|------------------------------------|-------|--------|----------|----------|
| 12961 | 10467328 | <a href="#">NM_001081075</a>       | <a href="#">70567</a>  | RIKEN cDNA 5730455O13 gene     | <a href="#">5730455O13Rik</a>      | 0.947 | -0.853 | 0.421216 | 0.683672 |
| 12962 | 10474373 | <a href="#">NM_021275</a>          | <a href="#">16492</a>  | potassium voltage-gated channe | <a href="#">Kcna4</a>              | 0.947 | -0.108 | 0.9166   | 0.967047 |
| 12963 | 10555156 | <a href="#">ENSMUST00000098274</a> | <a href="#">14918</a>  | guanylate cyclase 2d           | <a href="#">Gucy2d</a>             | 0.947 | -0.251 | 0.809043 | 0.923112 |
| 12964 | 10546101 |                                    |                        |                                |                                    | 0.947 | -1.001 | 0.349391 | 0.622894 |
| 12965 | 10409222 | <a href="#">NM_009167</a>          | <a href="#">20418</a>  | src homology 2 domain-containi | <a href="#">Shc3</a>               | 0.947 | -0.644 | 0.539346 | 0.772158 |
| 12966 | 10421269 | <a href="#">NM_011366</a>          | <a href="#">20410</a>  | sorbin and SH3 domain containi | <a href="#">Sorbs3</a>             | 0.947 | -0.843 | 0.426534 | 0.688078 |
| 12967 | 10534743 | <a href="#">NM_011741</a>          | <a href="#">22635</a>  | zonadhesin                     | <a href="#">Zan</a>                | 0.947 | -0.598 | 0.568379 | 0.793239 |
| 12968 | 10603785 | <a href="#">NM_028058</a>          | <a href="#">72018</a>  | FUN14 domain containing 1      | <a href="#">Fundc1</a>             | 0.947 | -0.614 | 0.557842 | 0.785788 |
| 12969 | 10373192 | <a href="#">NM_008382</a>          | <a href="#">16326</a>  | inhibin beta E                 | <a href="#">Inhbe</a>              | 0.947 | 0.051  | 0.960696 | 0.985069 |
| 12970 | 10579538 |                                    |                        |                                |                                    | 0.947 | -0.623 | 0.552294 | 0.782016 |
| 12971 | 10440284 | <a href="#">BC020029</a>           | <a href="#">67609</a>  | RIKEN cDNA 4930453N24 gene     | <a href="#">4930453N24Rik</a>      | 0.947 | -1.058 | 0.324069 | 0.600613 |
| 12972 | 10418011 | <a href="#">NM_001013826</a>       | <a href="#">435391</a> | dual specificity phosphatase a | <a href="#">Dupd1</a>              | 0.947 | -0.454 | 0.662869 | 0.849901 |
| 12973 | 10577586 | <a href="#">NM_001122820</a>       | <a href="#">64933</a>  | adaptor-related protein comple | <a href="#">Ap3m2</a>              | 0.947 | -1.078 | 0.315872 | 0.592775 |
| 12974 | 10425018 | <a href="#">NM_012053</a>          | <a href="#">26961</a>  | ribosomal protein L8           | <a href="#">Rpl8</a>               | 0.947 | -1.369 | 0.212012 | 0.47745  |
| 12975 | 10576386 | <a href="#">NM_133955</a>          | <a href="#">69581</a>  | ras homolog gene family, membe | <a href="#">Rhou</a>               | 0.947 | -0.925 | 0.38483  | 0.65414  |
| 12976 | 10369250 |                                    |                        |                                |                                    | 0.947 | -0.827 | 0.434734 | 0.695207 |
| 12977 | 10533483 | <a href="#">NM_001110140</a>       | <a href="#">11938</a>  | ATPase, Ca++ transporting, car | <a href="#">Atp2a2</a>             | 0.947 | -1.263 | 0.246057 | 0.51906  |
| 12978 | 10492671 | <a href="#">NM_026352</a>          | <a href="#">67738</a>  | peptidylprolyl isomerase D (cy | <a href="#">Ppid</a>               | 0.947 | -1.36  | 0.214707 | 0.48157  |
| 12979 | 10381528 | <a href="#">NM_178053</a>          | <a href="#">217214</a> | N-acetylglutamate synthase     | <a href="#">Nags</a>               | 0.947 | -0.369 | 0.722824 | 0.87962  |
| 12980 | 10399208 | <a href="#">ENSMUST00000058644</a> | <a href="#">217951</a> | transmembrane protein 196      | <a href="#">Tmem196</a>            | 0.947 | -0.548 | 0.600402 | 0.812266 |
| 12981 | 10525076 | <a href="#">NM_145565</a>          | <a href="#">231691</a> | serine dehydratase             | <a href="#">Sds</a>                | 0.947 | -0.928 | 0.383288 | 0.652674 |
| 12982 | 10499941 | <a href="#">NM_028629</a>          | <a href="#">433619</a> | keratinocyte expressed, prolin | <a href="#">Kprp</a>               | 0.947 | -0.134 | 0.896709 | 0.959515 |
| 12983 | 10351037 | <a href="#">NR_002840</a>          | <a href="#">14455</a>  | growth arrest specific 5       | <a href="#">Gas5</a>               | 0.947 | -0.971 | 0.362995 | 0.63431  |
| 12984 | 10402730 | <a href="#">NM_011625</a>          | <a href="#">21981</a>  | protein phosphatase 1, regulat | <a href="#">Ppp1r13b</a>           | 0.947 | -0.75  | 0.476887 | 0.727649 |
| 12985 | 10583291 | <a href="#">BC055786</a>           | <a href="#">69137</a>  | RIKEN cDNA 2200002K05 gene     | <a href="#">2200002K05Rik</a>      | 0.947 | -0.587 | 0.575415 | 0.797076 |
| 12986 | 10364752 | <a href="#">NM_133188</a>          | <a href="#">70248</a>  | DAZ associated protein 1       | <a href="#">Dazap1</a>             | 0.947 | -1.048 | 0.328285 | 0.604687 |
| 12987 | 10444496 | <a href="#">NM_033613</a>          | <a href="#">112403</a> | DOM-3 homolog Z (C. elegans)   | <a href="#">Dom3z</a>              | 0.947 | -1.075 | 0.316898 | 0.594121 |
| 12988 | 10574743 | <a href="#">NM_001081333</a>       | <a href="#">102075</a> | pleckstrin homology domain con | <a href="#">Plekhg4</a>            | 0.947 | -0.12  | 0.907549 | 0.963723 |
| 12989 | 10541279 | <a href="#">NM_153516</a>          | <a href="#">94044</a>  | BCL2-like 13 (apoptosis facili | <a href="#">Bcl2l13</a>            | 0.947 | -0.667 | 0.525518 | 0.761639 |
| 12990 | 10514789 | <a href="#">XR_033866</a>          | <a href="#">433742</a> | similar to ubiquitin-conjugati | <a href="#">LOC433742</a>          | 0.947 | -0.912 | 0.391171 | 0.65951  |
| 12991 | 10593471 |                                    |                        |                                |                                    | 0.947 | -0.571 | 0.585121 | 0.802686 |
| 12992 | 10576795 | <a href="#">ENSMUST00000111031</a> | <a href="#">170786</a> | CD209a antigen                 | <a href="#">Cd209a</a>             | 0.947 | -0.482 | 0.644208 | 0.839078 |
| 12993 | 10448765 | <a href="#">NM_013931</a>          | <a href="#">30957</a>  | mitogen-activated protein kina | <a href="#">Mapk8ip3</a>           | 0.947 | -1.503 | 0.175361 | 0.4286   |
| 12994 | 10479136 | <a href="#">NM_020580</a>          | <a href="#">57314</a>  | TH1-like homolog (Drosophila)  | <a href="#">Th1l</a>               | 0.947 | -1.246 | 0.251808 | 0.525693 |
| 12995 | 10415636 | <a href="#">NM_145837</a>          | <a href="#">239114</a> | interleukin 17D                | <a href="#">Il17d</a>              | 0.947 | -0.789 | 0.455127 | 0.711341 |
| 12996 | 10580807 | <a href="#">NM_010631</a>          | <a href="#">16582</a>  | kinesin family member C3       | <a href="#">Kifc3</a>              | 0.947 | -0.928 | 0.383542 | 0.652869 |
| 12997 | 10427454 | <a href="#">ENSMUST00000055038</a> | <a href="#">239319</a> | caspase recruitment domain fam | <a href="#">Card6</a>              | 0.947 | -0.503 | 0.62998  | 0.831325 |
| 12998 | 10592727 | <a href="#">ENSMUST00000065379</a> | <a href="#">213211</a> | ring finger protein 26         | <a href="#">Rnf26</a>              | 0.947 | -1.071 | 0.318592 | 0.595817 |
| 12999 | 10390618 | <a href="#">NM_010895</a>          | <a href="#">18013</a>  | neurogenic differentiation 2   | <a href="#">Neurod2</a>            | 0.947 | -0.62  | 0.5542   | 0.783409 |
| 13000 | 10499354 | <a href="#">NM_031368</a>          | <a href="#">12095</a>  | bone gamma-carboxyglutamate pr | <a href="#">Bglap-rs1</a>          | 0.947 | -0.254 | 0.80637  | 0.921832 |
| 13001 | 10449363 | <a href="#">NM_019837</a>          | <a href="#">56409</a>  | nudix (nucleotide diphosphate  | <a href="#">Nudt3</a>              | 0.947 | -1.196 | 0.269639 | 0.544449 |
| 13002 | 10489127 | <a href="#">NM_011249</a>          | <a href="#">19650</a>  | retinoblastoma-like 1 (p107)   | <a href="#">Rbl1</a>               | 0.947 | -0.933 | 0.38082  | 0.650316 |
| 13003 | 10498531 | <a href="#">NM_019937</a>          | <a href="#">56706</a>  | cyclin L1                      | <a href="#">Ccnl1</a>              | 0.947 | -1.135 | 0.292669 | 0.568731 |
| 13004 | 10522946 | <a href="#">NM_009664</a>          | <a href="#">11698</a>  | ameloblastin                   | <a href="#">Ambn</a>               | 0.947 | -1.288 | 0.23738  | 0.509664 |
| 13005 | 10479481 |                                    |                        |                                |                                    | 0.947 | -0.244 | 0.813995 | 0.925212 |
| 13006 | 10494332 |                                    |                        |                                |                                    | 0.947 | -0.499 | 0.632385 | 0.832782 |
| 13007 | 10571367 |                                    |                        |                                |                                    | 0.947 | -1.448 | 0.189557 | 0.448035 |
| 13008 | 10493548 | <a href="#">NM_026784</a>          | <a href="#">68603</a>  | phosphomevalonate kinase       | <a href="#">Pmvk</a>               | 0.947 | -1.226 | 0.258582 | 0.532776 |
| 13009 | 10520506 | <a href="#">NM_010608</a>          | <a href="#">16527</a>  | potassium channel, subfamily K | <a href="#">Kcnk3</a>              | 0.947 | -0.998 | 0.350687 | 0.624059 |
| 13010 | 10519096 | <a href="#">NM_026395</a>          | <a href="#">67830</a>  | RER1 retention in endoplasmic  | <a href="#">Rer1</a>               | 0.947 | -1.027 | 0.33757  | 0.613173 |
| 13011 | 10427492 | <a href="#">ENSMUST00000082239</a> | <a href="#">791333</a> | predicted gene, ENSMUSG0000005 | <a href="#">ENSMUSG00000058898</a> | 0.947 | -1.228 | 0.257923 | 0.531958 |
| 13012 | 10553521 | <a href="#">NM_008087</a>          | <a href="#">14453</a>  | growth arrest specific 2       | <a href="#">Gas2</a>               | 0.947 | -1.291 | 0.236613 | 0.508732 |
|       |          |                                    |                        | RAB. member of RAS oncogene    |                                    |       |        |          |          |

|       |          |                                    |                           |                                |                                    |       |        |          |          |
|-------|----------|------------------------------------|---------------------------|--------------------------------|------------------------------------|-------|--------|----------|----------|
| 13013 | 10435617 | <a href="#">NM_001042499</a>       | <a href="#">67657</a>     | fa                             | <a href="#">Rabl3</a>              | 0.947 | -1.029 | 0.336746 | 0.612486 |
| 13014 | 10428449 |                                    |                           |                                |                                    | 0.947 | -0.705 | 0.503074 | 0.745637 |
| 13015 | 10558773 | <a href="#">NM_177897</a>          | <a href="#">330671</a>    | beta-1,4-N-acetyl-galactosamin | <a href="#">B4galnt4</a>           | 0.946 | -1.322 | 0.226522 | 0.497153 |
| 13016 | 10492540 | <a href="#">NM_008351</a>          | <a href="#">16159</a>     | interleukin 12a                | <a href="#">Il12a</a>              | 0.946 | -0.497 | 0.634197 | 0.833715 |
| 13017 | 10370320 | <a href="#">AF391115</a>           | <a href="#">108707</a>    | RIKEN cDNA 1810008A18 gene     | <a href="#">1810008A18Rik</a>      | 0.946 | -1.234 | 0.25603  | 0.530431 |
| 13018 | 10408058 | <a href="#">NM_207572</a>          | <a href="#">404335</a>    | olfactory receptor 1365        | <a href="#">Olfr1365</a>           | 0.946 | -0.641 | 0.541401 | 0.773838 |
| 13019 | 10585325 | <a href="#">XM_001478980</a>       | <a href="#">100042876</a> | similar to Btf3 protein        | <a href="#">LOC100042876</a>       | 0.946 | -1.2   | 0.268165 | 0.542786 |
| 13020 | 10575151 | <a href="#">ENSMUST00000046116</a> | <a href="#">78571</a>     | RIKEN cDNA C630050I24 gene     | <a href="#">C630050I24Rik</a>      | 0.946 | -1.372 | 0.211326 | 0.476813 |
| 13021 | 10378739 | <a href="#">NM_009536</a>          | <a href="#">22627</a>     | tyrosine 3-monooxygenase/trypt | <a href="#">Ywhae</a>              | 0.946 | -1.5   | 0.175974 | 0.429653 |
| 13022 | 10527562 | <a href="#">NM_008178</a>          | <a href="#">14842</a>     | GS homeobox 1                  | <a href="#">Gsx1</a>               | 0.946 | -0.79  | 0.454885 | 0.711239 |
| 13023 | 10366814 | <a href="#">NM_009870</a>          | <a href="#">12567</a>     | cyclin-dependent kinase 4      | <a href="#">Cdk4</a>               | 0.946 | -1.632 | 0.145333 | 0.387047 |
| 13024 | 10385656 | <a href="#">NM_001044697</a>       | <a href="#">22678</a>     | zinc finger protein 2          | <a href="#">Zfp2</a>               | 0.946 | -1.454 | 0.188017 | 0.446224 |
| 13025 | 10376482 | <a href="#">BC002181</a>           | <a href="#">67862</a>     | RIKEN cDNA 2310033P09 gene     | <a href="#">2310033P09Rik</a>      | 0.946 | -1.437 | 0.192739 | 0.452222 |
| 13026 | 10440570 | <a href="#">NM_001081068</a>       | <a href="#">78913</a>     | zinc finger protein 294        | <a href="#">Zfp294</a>             | 0.946 | -1.259 | 0.247125 | 0.520387 |
| 13027 | 10493709 | <a href="#">NM_013901</a>          | <a href="#">30791</a>     | solute carrier family 39 (zinc | <a href="#">Slc39a1</a>            | 0.946 | -0.843 | 0.426246 | 0.687967 |
| 13028 | 10537799 | <a href="#">NM_146445</a>          | <a href="#">258437</a>    | olfactory receptor 450         | <a href="#">Olfr450</a>            | 0.946 | -0.428 | 0.681032 | 0.858763 |
| 13029 | 10586015 | <a href="#">ENSMUST00000064351</a> | <a href="#">73298</a>     | RIKEN cDNA 1700036A12 gene     | <a href="#">1700036A12Rik</a>      | 0.946 | -0.389 | 0.708455 | 0.872343 |
| 13030 | 10344772 | <a href="#">NM_177722</a>          | <a href="#">240697</a>    | RIKEN cDNA 6030422M02 gene     | <a href="#">6030422M02Rik</a>      | 0.946 | -0.597 | 0.568516 | 0.793239 |
| 13031 | 10413183 | <a href="#">ENSMUST00000100826</a> | <a href="#">100038485</a> | predicted gene, ENSMUSG0000007 | <a href="#">ENSMUSG00000072686</a> | 0.946 | -0.812 | 0.442711 | 0.701385 |
| 13032 | 10428215 |                                    |                           |                                |                                    | 0.946 | -1.2   | 0.267929 | 0.542737 |
| 13033 | 10409261 | <a href="#">NM_001024474</a>       | <a href="#">68203</a>     | DIRAS family, GTP-binding RAS- | <a href="#">Diras2</a>             | 0.946 | -1.012 | 0.344267 | 0.618557 |
| 13034 | 10352980 | <a href="#">NM_027671</a>          | <a href="#">71096</a>     | syntrophin, gamma 1            | <a href="#">Sntg1</a>              | 0.946 | -0.591 | 0.572637 | 0.796254 |
| 13035 | 10584760 | <a href="#">ENSMUST00000080911</a> | <a href="#">77381</a>     | RIKEN cDNA C030014I23 gene     | <a href="#">C030014I23Rik</a>      | 0.946 | -0.998 | 0.350597 | 0.624045 |
| 13036 | 10484482 | <a href="#">NM_199223</a>          | <a href="#">269295</a>    | reticulon 4 receptor-like 2    | <a href="#">Rtn4rl2</a>            | 0.946 | -1.235 | 0.255518 | 0.529847 |
| 13037 | 10512195 | <a href="#">NM_026872</a>          | <a href="#">68926</a>     | ubiquitin-associated protein 2 | <a href="#">Ubp2</a>               | 0.946 | -1.35  | 0.217877 | 0.485795 |
| 13038 | 10399061 | <a href="#">NM_028731</a>          | <a href="#">52635</a>     | DNA segment, Chr 12, ERATO Doi | <a href="#">D12ErtD551e</a>        | 0.946 | -0.553 | 0.59693  | 0.810212 |
| 13039 | 10349016 | <a href="#">NM_173187</a>          | <a href="#">227446</a>    | RIKEN cDNA 2310035C23 gene     | <a href="#">2310035C23Rik</a>      | 0.946 | -1.146 | 0.288335 | 0.564287 |
| 13040 | 10437970 | <a href="#">BC089026</a>           | <a href="#">224008</a>    | RIKEN cDNA 2310008H04 gene     | <a href="#">2310008H04Rik</a>      | 0.946 | -1.182 | 0.274847 | 0.549538 |
| 13041 | 10510034 | <a href="#">NM_015733</a>          | <a href="#">12371</a>     | caspase 9                      | <a href="#">Casp9</a>              | 0.946 | -0.814 | 0.441494 | 0.700402 |
| 13042 | 10559667 | <a href="#">NM_008350</a>          | <a href="#">16156</a>     | interleukin 11                 | <a href="#">Il11</a>               | 0.946 | -0.507 | 0.627475 | 0.83052  |
| 13043 | 10512830 | <a href="#">NM_001024136</a>       | <a href="#">75691</a>     | ankyrin repeat and sterile alp | <a href="#">Anks6</a>              | 0.946 | -0.821 | 0.438136 | 0.697167 |
| 13044 | 10526997 | <a href="#">XM_917042</a>          | <a href="#">231836</a>    | predicted gene, EG231836       | <a href="#">EG231836</a>           | 0.946 | -0.823 | 0.437048 | 0.696483 |
| 13045 | 10562532 | <a href="#">NM_172385</a>          | <a href="#">243937</a>    | zinc finger protein 536        | <a href="#">Zfp536</a>             | 0.946 | -0.408 | 0.694789 | 0.866071 |
| 13046 | 10577910 | <a href="#">NM_008033</a>          | <a href="#">14272</a>     | farnesyltransferase, CAAX box, | <a href="#">Fnta</a>               | 0.946 | -1.468 | 0.184296 | 0.44191  |
| 13047 | 10345174 |                                    |                           |                                |                                    | 0.946 | -0.998 | 0.35038  | 0.623869 |
| 13048 | 10400006 | <a href="#">NM_013464</a>          | <a href="#">11622</a>     | aryl-hydrocarbon receptor      | <a href="#">Ahr</a>                | 0.946 | -0.798 | 0.450261 | 0.707462 |
| 13049 | 10391407 | <a href="#">NM_026618</a>          | <a href="#">52469</a>     | coiled-coil domain containing  | <a href="#">Ccdc56</a>             | 0.946 | -1.487 | 0.179255 | 0.434671 |
| 13050 | 10397311 | <a href="#">NM_030225</a>          | <a href="#">78920</a>     | dihydrolipoamide S-succinyltra | <a href="#">Dlst</a>               | 0.946 | -1.033 | 0.335201 | 0.610757 |
| 13051 | 10470427 | <a href="#">NM_080848</a>          | <a href="#">140858</a>    | WD repeat domain 5             | <a href="#">Wdr5</a>               | 0.946 | -1.397 | 0.203767 | 0.466884 |
| 13052 | 10515368 | <a href="#">NM_026654</a>          | <a href="#">68276</a>     | target of EGR1, member 1 (nucl | <a href="#">Toe1</a>               | 0.946 | -1.216 | 0.262114 | 0.536613 |
| 13053 | 10579234 | <a href="#">NM_001122829</a>       | <a href="#">19704</a>     | UPF1 regulator of nonsense tra | <a href="#">Upf1</a>               | 0.946 | -1.374 | 0.210718 | 0.476211 |
| 13054 | 10505213 | <a href="#">NM_153158</a>          | <a href="#">230259</a>    | RIKEN cDNA E130308A19 gene     | <a href="#">E130308A19Rik</a>      | 0.946 | -1.176 | 0.276772 | 0.551925 |
| 13055 | 10581914 | <a href="#">NM_019950</a>          | <a href="#">56773</a>     | carbohydrate (N-acetylglucosam | <a href="#">Chst5</a>              | 0.946 | -1.249 | 0.250623 | 0.52441  |
| 13056 | 10600741 | <a href="#">ENSMUST00000096371</a> | <a href="#">546347</a>    | predicted gene, EG546347       | <a href="#">EG546347</a>           | 0.946 | -0.541 | 0.604501 | 0.815411 |
| 13057 | 10494039 | <a href="#">NM_177250</a>          | <a href="#">320747</a>    | leucine rich repeat and Ig dom | <a href="#">Lingo4</a>             | 0.946 | -0.541 | 0.605019 | 0.815765 |
| 13058 | 10469083 | <a href="#">NM_001081132</a>       | <a href="#">326622</a>    | UPF2 regulator of nonsense tra | <a href="#">Upf2</a>               | 0.946 | -1.229 | 0.257676 | 0.531801 |
| 13059 | 10468251 |                                    |                           |                                |                                    | 0.946 | -0.865 | 0.414831 | 0.67815  |
| 13060 | 10521574 | <a href="#">NM_172709</a>          | <a href="#">21906</a>     | otopetrin 1                    | <a href="#">Otop1</a>              | 0.946 | -1.59  | 0.154501 | 0.399653 |
| 13061 | 10530625 | <a href="#">XR_034092</a>          | <a href="#">627733</a>    | similar to MGC27348 protein    | <a href="#">LOC627733</a>          | 0.946 | -0.992 | 0.353476 | 0.626216 |
| 13062 | 10414612 | <a href="#">NM_001039676</a>       | <a href="#">214922</a>    | solute carrier family 39 (zinc | <a href="#">Slc39a2</a>            | 0.946 | -0.79  | 0.454789 | 0.711187 |

|       |          |                                    |                           |                                |                                    |       |        |           |          |
|-------|----------|------------------------------------|---------------------------|--------------------------------|------------------------------------|-------|--------|-----------|----------|
| 13063 | 10502257 | <a href="#">NM_026231</a>          | <a href="#">67553</a>     | glutathione S-transferase, C-t | <a href="#">Gsted</a>              | 0.946 | -1.351 | 0.217689  | 0.485428 |
| 13064 | 10378785 | <a href="#">BC048728</a>           | <a href="#">320522</a>    | RIKEN cDNA A830053O21 gene     | <a href="#">A830053O21Rik</a>      | 0.946 | -1.075 | 0.317017  | 0.594239 |
| 13065 | 10548817 | <a href="#">BC019793</a>           | <a href="#">66857</a>     | RIKEN cDNA 1100001H23 gene     | <a href="#">1100001H23Rik</a>      | 0.946 | -1.027 | 0.337504  | 0.613145 |
| 13066 | 10488497 | <a href="#">NM_054068</a>          | <a href="#">114889</a>    | visual system homeobox 1 homol | <a href="#">Vsx1</a>               | 0.946 | -0.321 | 0.757558  | 0.898154 |
| 13067 | 10545780 | <a href="#">BC145693</a>           | <a href="#">75914</a>     | exocyst complex component 6B   | <a href="#">Exoc6b</a>             | 0.946 | -0.819 | 0.438866  | 0.698065 |
| 13068 | 10420758 | <a href="#">NM_007549</a>          | <a href="#">12143</a>     | B lymphoid kinase              | <a href="#">Blk</a>                | 0.946 | -0.696 | 0.508163  | 0.750006 |
| 13069 | 10369028 | <a href="#">NM_153071</a>          | <a href="#">210198</a>    | G protein-coupled receptor, fa | <a href="#">Gprc6a</a>             | 0.946 | -0.656 | 0.532104  | 0.766201 |
| 13070 | 10442341 | <a href="#">NM_175229</a>          | <a href="#">75956</a>     | serine/arginine repetitive mat | <a href="#">Srrm2</a>              | 0.946 | -1.336 | 0.222212  | 0.491984 |
| 13071 | 10368654 | <a href="#">NM_176968</a>          | <a href="#">319638</a>    | 5'-nucleotidase domain contain | <a href="#">Nt5dc1</a>             | 0.946 | -1.04  | 0.332017  | 0.608173 |
| 13072 | 10345616 | <a href="#">NM_001037918</a>       | <a href="#">623661</a>    | lipoyltransferase 1            | <a href="#">Lipt1</a>              | 0.946 | -1.629 | 0.14605   | 0.387754 |
| 13073 | 10525043 | <a href="#">NM_028762</a>          | <a href="#">74111</a>     | RNA binding motif protein 19   | <a href="#">Rbm19</a>              | 0.946 | -1.269 | 0.243968  | 0.517035 |
| 13074 | 10431226 | <a href="#">NM_011105</a>          | <a href="#">18766</a>     | polycystic kidney disease (pol | <a href="#">Pkdrej</a>             | 0.946 | -0.471 | 0.651894  | 0.844083 |
| 13075 | 10391005 | <a href="#">NR_003957</a>          | <a href="#">16673</a>     | keratin 36                     | <a href="#">Krt36</a>              | 0.946 | -0.549 | 0.599367  | 0.811907 |
| 13076 | 10454856 | <a href="#">NM_028707</a>          | <a href="#">74002</a>     | pleckstrin and Sec7 domain con | <a href="#">Psd2</a>               | 0.946 | -0.309 | 0.765791  | 0.902563 |
| 13077 | 10424660 |                                    |                           |                                |                                    | 0.946 | -1.23  | 0.257458  | 0.531656 |
| 13078 | 10553917 | <a href="#">NM_007461</a>          | <a href="#">11784</a>     | amyloid beta (A4) precursor pr | <a href="#">Apba2</a>              | 0.946 | -0.51  | 0.625207  | 0.829015 |
| 13079 | 10411780 |                                    |                           |                                |                                    | 0.946 | -0.662 | 0.528421  | 0.763794 |
| 13080 | 10525086 | <a href="#">NM_133221</a>          | <a href="#">170756</a>    | solute carrier family 24 (sodi | <a href="#">Slc24a6</a>            | 0.946 | -0.819 | 0.4388    | 0.698014 |
| 13081 | 10445347 | <a href="#">NM_172621</a>          | <a href="#">224796</a>    | chloride intracellular channel | <a href="#">Clc5</a>               | 0.946 | -0.764 | 0.469038  | 0.721314 |
| 13082 | 10607705 | <a href="#">NM_009789</a>          | <a href="#">12309</a>     | S100 calcium binding protein G | <a href="#">S100g</a>              | 0.946 | -0.813 | 0.442213  | 0.700945 |
| 13083 | 10373358 | <a href="#">NM_031252</a>          | <a href="#">83430</a>     | interleukin 23, alpha subunit  | <a href="#">Il23a</a>              | 0.946 | -0.527 | 0.61398   | 0.821282 |
| 13084 | 10555225 | <a href="#">ENSMUST00000037359</a> | <a href="#">72184</a>     | RIKEN cDNA 2810406K13 gene     | <a href="#">2810406K13Rik</a>      | 0.945 | -0.747 | 0.478472  | 0.729035 |
| 13085 | 10366994 | <a href="#">NM_001081219</a>       | <a href="#">432516</a>    | myosin IA                      | <a href="#">Myo1a</a>              | 0.945 | -0.722 | 0.492896  | 0.73872  |
| 13086 | 10563110 | <a href="#">NR_002455</a>          | <a href="#">27210</a>     | small nucleolar RNA, C/D box 3 | <a href="#">Snord34</a>            | 0.945 | -0.402 | 0.69922   | 0.868235 |
| 13087 | 10383245 | <a href="#">NM_028898</a>          | <a href="#">74370</a>     | RIKEN cDNA 4932417H02 gene     | <a href="#">4932417H02Rik</a>      | 0.945 | -1.064 | 0.321468  | 0.598233 |
| 13088 | 10584700 | <a href="#">NM_007875</a>          | <a href="#">13478</a>     | dolichyl-phosphate (UDP-N-acet | <a href="#">Dpagt1</a>             | 0.945 | -1.519 | 0.17132   | 0.423276 |
| 13089 | 10534489 | <a href="#">NM_001013412</a>       | <a href="#">541307</a>    | chemokine (C-C motif) ligand 2 | <a href="#">Ccl26</a>              | 0.945 | -0.135 | 0.89668   | 0.959515 |
| 13090 | 10473045 | <a href="#">NM_153405</a>          | <a href="#">241490</a>    | RNA binding motif protein 45   | <a href="#">Rbm45</a>              | 0.945 | -0.899 | 0.397438  | 0.664302 |
| 13091 | 10479369 | <a href="#">ENSMUST00000069943</a> | <a href="#">100036520</a> | predicted gene, OTTMUSG0000001 | <a href="#">OTTMUSG00000016300</a> | 0.945 | -0.887 | 0.40354   | 0.668494 |
| 13092 | 10520096 | <a href="#">NM_026448</a>          | <a href="#">52323</a>     | kelch-like 7 (Drosophila)      | <a href="#">Klh7</a>               | 0.945 | -0.98  | 0.358944  | 0.630988 |
| 13093 | 10345855 | <a href="#">NM_001033289</a>       | <a href="#">226999</a>    | solute carrier family 9 (sodi  | <a href="#">Slc9a2</a>             | 0.945 | -0.659 | 0.530414  | 0.765382 |
| 13094 | 10587892 | <a href="#">ENSMUST00000034980</a> | <a href="#">245000</a>    | ataxia telangiectasia and Rad3 | <a href="#">Atr</a>                | 0.945 | -1.124 | 0.297122  | 0.573626 |
| 13095 | 10542757 | <a href="#">NM_172734</a>          | <a href="#">232533</a>    | serine/threonine kinase 38 lik | <a href="#">Stk38l</a>             | 0.945 | -1.02  | 0.340677  | 0.615782 |
| 13096 | 10510814 | <a href="#">NM_177673</a>          | <a href="#">230967</a>    | cDNA sequence BC046331         | <a href="#">BC046331</a>           | 0.945 | -0.736 | 0.484949  | 0.733398 |
| 13097 | 10481114 | <a href="#">NM_030718</a>          | <a href="#">80908</a>     | ABO blood group (transferase A | <a href="#">Abo</a>                | 0.945 | -0.605 | 0.564008  | 0.79044  |
| 13098 | 10412719 | <a href="#">NM_028052</a>          | <a href="#">72003</a>     | synaptoporin                   | <a href="#">Synpr</a>              | 0.945 | -0.546 | 0.601711  | 0.813257 |
| 13099 | 10596255 |                                    |                           |                                |                                    | 0.945 | -1     | 0.349785  | 0.62328  |
| 13100 | 10606858 | <a href="#">NM_025703</a>          | <a href="#">66684</a>     | transcription elongation facto | <a href="#">Tceal8</a>             | 0.945 | -1.133 | 0.293511  | 0.569566 |
| 13101 | 10361995 | <a href="#">NM_027930</a>          | <a href="#">71804</a>     | RIKEN cDNA 2610016C23 gene     | <a href="#">2610016C23Rik</a>      | 0.945 | -0.518 | 0.620288  | 0.825285 |
| 13102 | 10460738 | <a href="#">NM_026410</a>          | <a href="#">67849</a>     | cell division cycle associated | <a href="#">Cdca5</a>              | 0.945 | -1.909 | 0.0966275 | 0.302546 |
| 13103 | 10478073 |                                    |                           |                                |                                    | 0.945 | -0.735 | 0.485795  | 0.734004 |
| 13104 | 10490287 | <a href="#">XM_994502</a>          | <a href="#">675837</a>    | similar to ribosomal protein L | <a href="#">LOC675837</a>          | 0.945 | -1.021 | 0.340166  | 0.615478 |
| 13105 | 10430974 | <a href="#">NM_025445</a>          | <a href="#">66251</a>     | ADP-ribosylation factor GTPase | <a href="#">Arfgap3</a>            | 0.945 | -1.523 | 0.170259  | 0.421869 |
| 13106 | 10563436 | <a href="#">NM_021482</a>          | <a href="#">58867</a>     | synaptogyrin 4                 | <a href="#">Syngr4</a>             | 0.945 | -0.599 | 0.567261  | 0.792635 |
| 13107 | 10425158 | <a href="#">NM_020271</a>          | <a href="#">57028</a>     | pyridoxal (pyridoxine, vitamin | <a href="#">Pdxp</a>               | 0.945 | -0.948 | 0.373919  | 0.644137 |
| 13108 | 10534839 | <a href="#">NM_028753</a>          | <a href="#">74097</a>     | processing of precursor 7, rib | <a href="#">Pop7</a>               | 0.945 | -1.66  | 0.139583  | 0.37794  |
| 13109 | 10513943 | <a href="#">ENSMUST00000102837</a> | <a href="#">242505</a>    | RAS and EF hand domain contain | <a href="#">Rasef</a>              | 0.945 | -1.13  | 0.294542  | 0.570921 |
| 13110 | 10463632 | <a href="#">NM_029186</a>          | <a href="#">75146</a>     | transmembrane protein 180      | <a href="#">Tmem180</a>            | 0.945 | -0.696 | 0.508393  | 0.750241 |
| 13111 | 10480288 | <a href="#">BC119802</a>           | <a href="#">74103</a>     | nebullette                     | <a href="#">Neb1</a>               | 0.945 | -1.205 | 0.26614   | 0.541183 |
| 13112 | 10514396 |                                    |                           |                                |                                    | 0.945 | -0.293 | 0.777551  | 0.909562 |
| 13113 | 10507922 | <a href="#">NM_026015</a>          | <a href="#">60022</a>     | lysine-like 4                  | <a href="#">Lys14</a>              | 0.945 | -0.012 | 0.20105   | 0.650412 |

|       |          |                                    |                           |                                   |                                    |       |        |          |          |
|-------|----------|------------------------------------|---------------------------|-----------------------------------|------------------------------------|-------|--------|----------|----------|
| 13113 | 10597623 | <a href="#">NM_020913</a>          | <a href="#">09032</a>     | lysozyme-hke 4                    | <a href="#">Lyzi4</a>              | 0.945 | -0.912 | 0.39105  | 0.039412 |
| 13114 | 10426081 | <a href="#">NM_134096</a>          | <a href="#">106014</a>    | expressed sequence AW049604       | <a href="#">AW049604</a>           | 0.945 | -0.848 | 0.423912 | 0.686151 |
| 13115 | 10460829 |                                    |                           |                                   |                                    | 0.945 | -0.651 | 0.534933 | 0.768697 |
| 13116 | 10414706 | <a href="#">ENSMUST00000103569</a> | <a href="#">100042372</a> | T cell receptor alpha variable    | <a href="#">Trav2</a>              | 0.945 | -0.216 | 0.835258 | 0.933323 |
| 13117 | 10491993 | <a href="#">NM_153156</a>          | <a href="#">229277</a>    | stomatin (Epb7.2)-like 3          | <a href="#">Stoml3</a>             | 0.945 | -1.349 | 0.218282 | 0.48639  |
| 13118 | 10538959 | <a href="#">ENSMUST00000069634</a> | <a href="#">232077</a>    | similar to hCG33270               | <a href="#">LOC232077</a>          | 0.945 | -0.695 | 0.508809 | 0.750513 |
| 13119 | 10480760 | <a href="#">NM_009422</a>          | <a href="#">22030</a>     | Tnf receptor-associated factor    | <a href="#">Traf2</a>              | 0.945 | -0.713 | 0.498104 | 0.742207 |
| 13120 | 10454233 | <a href="#">XR_031954</a>          | <a href="#">546708</a>    | similar to Ribosomal protein S    | <a href="#">LOC546708</a>          | 0.945 | -0.398 | 0.701993 | 0.869258 |
| 13121 | 10480676 | <a href="#">NM_008169</a>          | <a href="#">14810</a>     | glutamate receptor, ionotropic    | <a href="#">Gri1</a>               | 0.945 | -0.793 | 0.453334 | 0.709863 |
| 13122 | 10551155 |                                    |                           |                                   |                                    | 0.945 | -0.502 | 0.630863 | 0.831917 |
| 13123 | 10466814 | <a href="#">NM_008022</a>          | <a href="#">14237</a>     | forkhead box D4                   | <a href="#">Foxd4</a>              | 0.945 | -0.555 | 0.595792 | 0.809631 |
| 13124 | 10374151 | <a href="#">NM_028601</a>          | <a href="#">52915</a>     | zinc finger, MIZ-type containi    | <a href="#">Zmiz2</a>              | 0.945 | -0.981 | 0.358357 | 0.630567 |
| 13125 | 10441178 | <a href="#">NM_008405</a>          | <a href="#">16415</a>     | integrin beta 2-like              | <a href="#">Itgb2l</a>             | 0.945 | -0.23  | 0.824684 | 0.929565 |
| 13126 | 10449303 | <a href="#">NM_007523</a>          | <a href="#">12018</a>     | BCL2-antagonist/killer 1          | <a href="#">Bak1</a>               | 0.945 | -1.662 | 0.1392   | 0.377453 |
| 13127 | 10594998 | <a href="#">AK137986</a>           | <a href="#">100038597</a> | predicted gene,<br>ENSMUSG0000007 | <a href="#">ENSMUSG00000074197</a> | 0.945 | -0.511 | 0.624688 | 0.828892 |
| 13128 | 10489413 | <a href="#">NM_025996</a>          | <a href="#">67145</a>     | translocase of outer mitochond    | <a href="#">Tomm34</a>             | 0.945 | -0.841 | 0.427131 | 0.688411 |
| 13129 | 10470206 | <a href="#">NM_029959</a>          | <a href="#">77704</a>     | lipocalin 9                       | <a href="#">Lcn9</a>               | 0.945 | -0.971 | 0.363117 | 0.634368 |
| 13130 | 10354792 | <a href="#">NR_004860</a>          | <a href="#">68736</a>     | RIKEN cDNA 1110034B05<br>gene     | <a href="#">1110034B05Rik</a>      | 0.945 | -1.164 | 0.281545 | 0.556926 |
| 13131 | 10565532 | <a href="#">NM_028665</a>          | <a href="#">73845</a>     | ankyrin repeat domain 42          | <a href="#">Ankrd42</a>            | 0.945 | -0.709 | 0.500458 | 0.743513 |
| 13132 | 10428648 | <a href="#">NM_001081288</a>       | <a href="#">319944</a>    | TAF2 RNA polymerase II,<br>TATA b | <a href="#">Taf2</a>               | 0.945 | -1.42  | 0.197433 | 0.457935 |
| 13133 | 10498296 | <a href="#">NM_175095</a>          | <a href="#">52245</a>     | COMM domain containing 2          | <a href="#">Comm2</a>              | 0.945 | -1.396 | 0.204214 | 0.467434 |
| 13134 | 10350684 | <a href="#">NM_026369</a>          | <a href="#">67771</a>     | actin related protein 2/3 comp    | <a href="#">Arpc5</a>              | 0.945 | -1.598 | 0.152784 | 0.396864 |
| 13135 | 10480057 | <a href="#">NM_152824</a>          | <a href="#">76938</a>     | RNA binding motif protein 17      | <a href="#">Rbm17</a>              | 0.945 | -1.489 | 0.178864 | 0.43395  |
| 13136 | 10605351 |                                    |                           |                                   |                                    | 0.945 | -0.677 | 0.519439 | 0.757547 |
| 13137 | 10543772 | <a href="#">DQ534758</a>           | <a href="#">619665</a>    | Kruppel-like factor 14            | <a href="#">Klf14</a>              | 0.945 | -1.156 | 0.284551 | 0.559679 |
| 13138 | 10430344 | <a href="#">NM_008368</a>          | <a href="#">16185</a>     | interleukin 2 receptor, beta c    | <a href="#">Il2rb</a>              | 0.945 | -0.941 | 0.377244 | 0.647281 |
| 13139 | 10506148 | <a href="#">ENSMUST00000094955</a> | <a href="#">100137011</a> | predicted gene,<br>OTTMUSG0000000 | <a href="#">OTTMUSG00000007987</a> | 0.945 | -0.276 | 0.790575 | 0.914692 |
| 13140 | 10570513 | <a href="#">ENSMUST00000058886</a> | <a href="#">67262</a>     | RIKEN cDNA 2900016B01<br>gene     | <a href="#">2900016B01Rik</a>      | 0.945 | -0.26  | 0.802008 | 0.919813 |
| 13141 | 10453676 | <a href="#">BC025933</a>           | <a href="#">100038402</a> | predicted gene,<br>ENSMUSG0000007 | <a href="#">ENSMUSG00000073645</a> | 0.945 | -0.5   | 0.632176 | 0.832782 |
| 13142 | 10574100 |                                    |                           |                                   |                                    | 0.945 | -0.584 | 0.57677  | 0.797659 |
| 13143 | 10377181 | <a href="#">NM_001081250</a>       | <a href="#">544791</a>    | myosin, heavy polypeptide 13,     | <a href="#">Myh13</a>              | 0.945 | -0.74  | 0.482782 | 0.731475 |
| 13144 | 10568873 | <a href="#">NM_007403</a>          | <a href="#">11501</a>     | a disintegrin and metalloprotei   | <a href="#">Adam8</a>              | 0.945 | -1.091 | 0.310197 | 0.586865 |
| 13145 | 10378754 | <a href="#">NM_027773</a>          | <a href="#">116972</a>    | RIKEN cDNA 2310047D13<br>gene     | <a href="#">2310047D13Rik</a>      | 0.945 | -1.055 | 0.3256   | 0.601936 |
| 13146 | 10480492 | <a href="#">NM_001042528</a>       | <a href="#">12287</a>     | calcium channel, voltage-depen    | <a href="#">Cacna1b</a>            | 0.945 | -0.473 | 0.650149 | 0.843113 |
| 13147 | 10523979 | <a href="#">NM_008806</a>          | <a href="#">18587</a>     | phosphodiesterase 6B, cGMP, ro    | <a href="#">Pde6b</a>              | 0.945 | -1.129 | 0.295072 | 0.571337 |
| 13148 | 10367393 | <a href="#">NM_030100</a>          | <a href="#">78428</a>     | within bcn homolog (Drosophil     | <a href="#">Wibg</a>               | 0.945 | -1.276 | 0.241426 | 0.514329 |
| 13149 | 10478415 | <a href="#">NM_016873</a>          | <a href="#">22403</a>     | WNT1 inducible signaling pathw    | <a href="#">Wisp2</a>              | 0.945 | -0.352 | 0.734924 | 0.886784 |
| 13150 | 10416195 | <a href="#">NM_010921</a>          | <a href="#">18095</a>     | NK-3 transcription factor, loc    | <a href="#">Nkx3-1</a>             | 0.945 | -0.617 | 0.556245 | 0.784737 |
| 13151 | 10394527 | <a href="#">NM_029321</a>          | <a href="#">75516</a>     | tetratricopeptide repeat domai    | <a href="#">Ttc32</a>              | 0.945 | -1.263 | 0.245927 | 0.51897  |
| 13152 | 10472589 | <a href="#">NM_028521</a>          | <a href="#">73373</a>     | phosphatase, orphan 2             | <a href="#">Phospho2</a>           | 0.945 | -0.971 | 0.363171 | 0.63441  |
| 13153 | 10418895 | <a href="#">NM_001013777</a>       | <a href="#">382867</a>    | zinc finger protein 488           | <a href="#">Zfp488</a>             | 0.945 | -1.255 | 0.248471 | 0.521974 |
| 13154 | 10520923 | <a href="#">NM_001081407</a>       | <a href="#">665270</a>    | phospholipase B1                  | <a href="#">Plb1</a>               | 0.945 | -0.595 | 0.570191 | 0.794629 |
| 13155 | 10578027 | <a href="#">NM_026453</a>          | <a href="#">67920</a>     | RNA binding motif protein 13      | <a href="#">Rbm13</a>              | 0.945 | -1.437 | 0.192731 | 0.452222 |
| 13156 | 10572070 | <a href="#">NM_010934</a>          | <a href="#">18166</a>     | neuropeptide Y receptor Y1        | <a href="#">Npy1r</a>              | 0.945 | -0.634 | 0.545924 | 0.777622 |
| 13157 | 10559238 | <a href="#">NR_002855</a>          | <a href="#">111975</a>    | insulin-like growth factor 2,     | <a href="#">Igf2as</a>             | 0.945 | -1.445 | 0.190362 | 0.44932  |
| 13158 | 10392715 | <a href="#">NM_138598</a>          | <a href="#">28081</a>     | DNA segment, Chr 11, Wayne<br>Sta | <a href="#">D11Wsu99e</a>          | 0.945 | -1.453 | 0.188212 | 0.446289 |
| 13159 | 10398881 | <a href="#">ENSMUST00000037962</a> | <a href="#">382639</a>    | predicted gene, EG382639          | <a href="#">EG382639</a>           | 0.945 | -0.415 | 0.690154 | 0.864031 |
| 13160 | 10533261 | <a href="#">NM_011286</a>          | <a href="#">19894</a>     | rabphilin 3A                      | <a href="#">Rph3a</a>              | 0.945 | -0.864 | 0.415188 | 0.678399 |
| 13161 | 10474399 | <a href="#">NM_001048139</a>       | <a href="#">12064</a>     | brain derived neurotrophic fac    | <a href="#">Bdnf</a>               | 0.945 | -0.682 | 0.516311 | 0.755598 |
| 13162 | 10459927 | <a href="#">ENSMUST00000077962</a> | <a href="#">240444</a>    | potassium voltage-gated channe    | <a href="#">Keng2</a>              | 0.945 | -1.163 | 0.281905 | 0.557053 |
| 13163 | 10470214 | <a href="#">NM_175462</a>          | <a href="#">227632</a>    | potassium channel, subfamily T    | <a href="#">Kent1</a>              | 0.945 | -0.302 | 0.771393 | 0.905701 |

|       |          |                                    |                        |                                |                               |       |        |          |          |
|-------|----------|------------------------------------|------------------------|--------------------------------|-------------------------------|-------|--------|----------|----------|
| 13164 | 10420532 | <a href="#">NM_015803</a>          | <a href="#">50769</a>  | ATPase, aminophospholipid tran | <a href="#">Atp8a2</a>        | 0.945 | -0.512 | 0.624262 | 0.828379 |
| 13165 | 10567041 | <a href="#">ENSMUST00000098100</a> | <a href="#">434228</a> | predicted gene, EG434228       | <a href="#">EG434228</a>      | 0.945 | -0.276 | 0.790274 | 0.914539 |
| 13166 | 10543650 | <a href="#">NM_177296</a>          | <a href="#">320938</a> | transportin 3                  | <a href="#">Tnpo3</a>         | 0.944 | -1.564 | 0.160649 | 0.408266 |
| 13167 | 10529711 | <a href="#">NM_013748</a>          | <a href="#">27278</a>  | cytokine-dependent hematopoiet | <a href="#">Clnk</a>          | 0.944 | -0.29  | 0.779872 | 0.910713 |
| 13168 | 10531729 | <a href="#">NM_027978</a>          | <a href="#">71883</a>  | coenzyme Q2 homolog, prenyltra | <a href="#">Coq2</a>          | 0.944 | -1.435 | 0.193115 | 0.452493 |
| 13169 | 10395376 | <a href="#">NM_146033</a>          | <a href="#">217473</a> | ankyrin repeat and MYND domain | <a href="#">Ankmy2</a>        | 0.944 | -0.894 | 0.399954 | 0.665979 |
| 13170 | 10509113 | <a href="#">NM_010178</a>          | <a href="#">14105</a>  | FUS interacting protein (serin | <a href="#">Fusip1</a>        | 0.944 | -0.747 | 0.478572 | 0.729081 |
| 13171 | 10440985 | <a href="#">NM_029252</a>          | <a href="#">75328</a>  | RIKEN cDNA 4930563D23 gene     | <a href="#">4930563D23Rik</a> | 0.944 | -1.155 | 0.285006 | 0.560313 |
| 13172 | 10443195 | <a href="#">NM_016660</a>          | <a href="#">15361</a>  | high mobility group AT-hook 1  | <a href="#">Hmga1</a>         | 0.944 | -1.002 | 0.348598 | 0.622215 |
| 13173 | 10447933 |                                    |                        |                                |                               | 0.944 | -0.959 | 0.368667 | 0.639361 |
| 13174 | 10491915 | <a href="#">NM_009834</a>          | <a href="#">12457</a>  | CCR4 carbon catabolite repress | <a href="#">Cern4l</a>        | 0.944 | -1.164 | 0.281339 | 0.556831 |
| 13175 | 10438639 | <a href="#">NM_138650</a>          | <a href="#">110197</a> | diacylglycerol kinase, gamma   | <a href="#">Dgkg</a>          | 0.944 | -0.859 | 0.418092 | 0.680624 |
| 13176 | 10576490 |                                    |                        |                                |                               | 0.944 | -0.36  | 0.728972 | 0.882586 |
| 13177 | 10472930 | <a href="#">NM_001005343</a>       | <a href="#">381373</a> | trans-acting transcription fac | <a href="#">Sp9</a>           | 0.944 | -0.897 | 0.398561 | 0.66476  |
| 13178 | 10584120 |                                    |                        |                                |                               | 0.944 | -0.519 | 0.619141 | 0.824741 |
| 13179 | 10603738 | <a href="#">NM_026128</a>          | <a href="#">67395</a>  | RIKEN cDNA 4930403L05 gene     | <a href="#">4930403L05Rik</a> | 0.944 | -0.458 | 0.660337 | 0.848652 |
| 13180 | 10455578 | <a href="#">NM_178377</a>          | <a href="#">69456</a>  | COMM domain containing 10      | <a href="#">Comm10</a>        | 0.944 | -1.497 | 0.176759 | 0.430877 |
| 13181 | 10532744 | <a href="#">NM_009151</a>          | <a href="#">20345</a>  | selectin, platelet (p-selectin | <a href="#">Selplg</a>        | 0.944 | -0.348 | 0.737915 | 0.88827  |
| 13182 | 10568916 | <a href="#">NM_010836</a>          | <a href="#">17703</a>  | homeobox, msh-like 3           | <a href="#">Msx3</a>          | 0.944 | -1.128 | 0.295524 | 0.57195  |
| 13183 | 10378768 | <a href="#">NM_183263</a>          | <a href="#">67390</a>  | RNA methyltransferase like 1   | <a href="#">Rnmt1l</a>        | 0.944 | -1.208 | 0.265062 | 0.540178 |
| 13184 | 10460987 | <a href="#">NM_020253</a>          | <a href="#">18190</a>  | neurexin II                    | <a href="#">Nrxn2</a>         | 0.944 | -0.602 | 0.56565  | 0.791744 |
| 13185 | 10528877 | <a href="#">NM_020295</a>          | <a href="#">56873</a>  | limb region 1                  | <a href="#">Lmbr1</a>         | 0.944 | -1.776 | 0.117778 | 0.3424   |
| 13186 | 10461640 |                                    |                        |                                |                               | 0.944 | -1.142 | 0.290046 | 0.566261 |
| 13187 | 10576152 | <a href="#">NM_021502</a>          | <a href="#">59005</a>  | trafficking protein particle c | <a href="#">Trappc2l</a>      | 0.944 | -1.02  | 0.340856 | 0.615921 |
| 13188 | 10583903 |                                    |                        |                                |                               | 0.944 | -0.717 | 0.495683 | 0.74053  |
| 13189 | 10481451 | <a href="#">BC062268</a>           | <a href="#">67350</a>  | RIKEN cDNA 1700084E18 gene     | <a href="#">1700084E18Rik</a> | 0.944 | -0.824 | 0.436459 | 0.696302 |
| 13190 | 10526882 | <a href="#">NM_001081265</a>       | <a href="#">433956</a> | HEAT repeat containing 2       | <a href="#">Heatr2</a>        | 0.944 | -0.762 | 0.470047 | 0.72213  |
| 13191 | 10406968 | <a href="#">NM_021790</a>          | <a href="#">60411</a>  | centromere protein K           | <a href="#">Cenpk</a>         | 0.944 | -1.539 | 0.166426 | 0.417266 |
| 13192 | 10406843 |                                    |                        |                                |                               | 0.944 | -0.823 | 0.436888 | 0.696333 |
| 13193 | 10592050 | <a href="#">NM_013800</a>          | <a href="#">12023</a>  | BarH-like homeobox 2           | <a href="#">Barx2</a>         | 0.944 | -0.314 | 0.762366 | 0.901088 |
| 13194 | 10580309 | <a href="#">NM_026399</a>          | <a href="#">67836</a>  | RIKEN cDNA 1500041N16 gene     | <a href="#">1500041N16Rik</a> | 0.944 | -0.825 | 0.435555 | 0.695606 |
| 13195 | 10364702 | <a href="#">NM_021565</a>          | <a href="#">59090</a>  | midnolin                       | <a href="#">Midn</a>          | 0.944 | -1.098 | 0.307661 | 0.584211 |
| 13196 | 10530041 | <a href="#">ENSMUST00000064097</a> | <a href="#">211001</a> | RIKEN cDNA 8030423F21 gene     | <a href="#">8030423F21Rik</a> | 0.944 | -0.981 | 0.358484 | 0.630584 |
| 13197 | 10490913 | <a href="#">NM_007606</a>          | <a href="#">12350</a>  | carbonic anhydrase 3           | <a href="#">Car3</a>          | 0.944 | -0.439 | 0.673724 | 0.855069 |
| 13198 | 10453740 |                                    |                        |                                |                               | 0.944 | -0.422 | 0.685623 | 0.861122 |
| 13199 | 10458033 | <a href="#">NM_133774</a>          | <a href="#">170459</a> | StAR-related lipid transfer (S | <a href="#">Stard4</a>        | 0.944 | -1.448 | 0.189669 | 0.44816  |
| 13200 | 10545075 |                                    |                        |                                |                               | 0.944 | -0.397 | 0.702512 | 0.869514 |
| 13201 | 10364287 | <a href="#">NM_019929</a>          | <a href="#">20610</a>  | SMT3 suppressor of mif two 3 h | <a href="#">Sumo3</a>         | 0.944 | -1.168 | 0.28012  | 0.55551  |
| 13202 | 10374348 | <a href="#">XR_032931</a>          | <a href="#">432537</a> | similar to Elongation factor 2 | <a href="#">LOC432537</a>     | 0.944 | -0.994 | 0.35228  | 0.625281 |
| 13203 | 10516487 | <a href="#">NM_008127</a>          | <a href="#">14621</a>  | gap junction protein, beta 4   | <a href="#">Gjb4</a>          | 0.944 | -0.188 | 0.855694 | 0.941646 |
| 13204 | 10355974 | <a href="#">NM_001111279</a>       | <a href="#">69368</a>  | WD repeat and FYVE domain cont | <a href="#">Wdfy1</a>         | 0.944 | -1.302 | 0.232798 | 0.503816 |
| 13205 | 10390072 |                                    |                        |                                |                               | 0.944 | -0.544 | 0.603149 | 0.814471 |
| 13206 | 10405924 |                                    |                        |                                |                               | 0.944 | -0.586 | 0.575864 | 0.797128 |
| 13207 | 10346310 | <a href="#">NM_025283</a>          | <a href="#">19070</a>  | MOB1, Mps One Binder kinase ac | <a href="#">Mobk13</a>        | 0.944 | -1.114 | 0.301128 | 0.5773   |
| 13208 | 10484733 | <a href="#">XM_621554</a>          | <a href="#">546769</a> | olfactory receptor 1174        | <a href="#">Olfr1174</a>      | 0.944 | -0.189 | 0.85495  | 0.941302 |
| 13209 | 10531664 |                                    |                        |                                |                               | 0.944 | -0.259 | 0.802604 | 0.919965 |
| 13210 | 10544638 | <a href="#">AB052758</a>           | <a href="#">101214</a> | transformer 2 alpha homolog (D | <a href="#">Tra2a</a>         | 0.944 | -0.941 | 0.376991 | 0.647069 |
| 13211 | 10536658 | <a href="#">NM_053116</a>          | <a href="#">93735</a>  | wingless-related MMTV integrat | <a href="#">Wnt16</a>         | 0.944 | -0.817 | 0.43982  | 0.699109 |
| 13212 | 10560315 | <a href="#">NM_011155</a>          | <a href="#">19060</a>  | protein phosphatase 5, catalyt | <a href="#">Ppp5c</a>         | 0.944 | -1.037 | 0.333057 | 0.609184 |
| 13213 | 10580131 | <a href="#">NM_194059</a>          | <a href="#">244551</a> | nanos homolog 3 (Drosophila)   | <a href="#">Nanos3</a>        | 0.944 | -1.194 | 0.270298 | 0.545133 |
| 13214 | 10372488 | <a href="#">NM_133683</a>          | <a href="#">67226</a>  | transmembrane protein 19       | <a href="#">Tmem19</a>        | 0.944 | -1.127 | 0.29571  | 0.572101 |
| 13215 | 10544805 | <a href="#">NM_008264</a>          | <a href="#">15208</a>  | transmembrane protein 12       | <a href="#">Tmem12</a>        | 0.944 | -0.922 | 0.421256 | 0.601807 |

|       |          |                                    |                           |                                           |                               |       |        |           |          |
|-------|----------|------------------------------------|---------------------------|-------------------------------------------|-------------------------------|-------|--------|-----------|----------|
| 13215 | 10544803 | <a href="#">NM_008204</a>          | <a href="#">12598</a>     | homeo box A15                             | <a href="#">Hoxa15</a>        | 0.944 | -0.833 | 0.451536  | 0.091897 |
| 13216 | 10591658 |                                    |                           |                                           |                               | 0.944 | -1.046 | 0.329489  | 0.605855 |
| 13217 | 10489451 | <a href="#">NM_017390</a>          | <a href="#">53878</a>     | seminal vesicle secretory prot            | <a href="#">Svs2</a>          | 0.944 | -0.796 | 0.451335  | 0.708496 |
| 13218 | 10486241 | <a href="#">NM_172857</a>          | <a href="#">241624</a>    | exonuclease 3'-5' domain-like             | <a href="#">Exd11</a>         | 0.944 | -0.632 | 0.547025  | 0.778141 |
| 13219 | 10383472 | <a href="#">NM_133223</a>          | <a href="#">170758</a>    | RAS-related C3 botulinum subst            | <a href="#">Rac3</a>          | 0.944 | -0.531 | 0.611102  | 0.819454 |
| 13220 | 10557262 | <a href="#">NM_146198</a>          | <a href="#">233836</a>    | solute carrier family 5 (sodiu            | <a href="#">Slc5a11</a>       | 0.944 | -0.497 | 0.633764  | 0.833492 |
| 13221 | 10385993 |                                    |                           |                                           |                               | 0.944 | -0.306 | 0.768261  | 0.903705 |
| 13222 | 10438555 | <a href="#">NM_009379</a>          | <a href="#">21832</a>     | thrombopoietin                            | <a href="#">Thpo</a>          | 0.944 | -1.023 | 0.339196  | 0.614614 |
| 13223 | 10562774 | <a href="#">AY761096</a>           | <a href="#">69683</a>     | RIKEN cDNA 2310044H10 gene                | <a href="#">2310044H10Rik</a> | 0.944 | -1.422 | 0.196929  | 0.457727 |
| 13224 | 10527184 | <a href="#">AK144491</a>           | <a href="#">67672</a>     | RIKEN cDNA 0610040B10 gene                | <a href="#">0610040B10Rik</a> | 0.944 | -1.017 | 0.342082  | 0.61636  |
| 13225 | 10558795 | <a href="#">NM_019762</a>          | <a href="#">56460</a>     | plakophilin 3                             | <a href="#">Pkp3</a>          | 0.944 | -0.676 | 0.519829  | 0.757566 |
| 13226 | 10390927 | <a href="#">NM_029613</a>          | <a href="#">76444</a>     | keratin associated protein 4-7            | <a href="#">Krtap4-7</a>      | 0.944 | -0.383 | 0.712516  | 0.874059 |
| 13227 | 10418016 | <a href="#">NM_001007268</a>       | <a href="#">27389</a>     | dual specificity phosphatase 1            | <a href="#">Dusp13</a>        | 0.943 | -0.733 | 0.486723  | 0.734514 |
| 13228 | 10462618 | <a href="#">NM_010501</a>          | <a href="#">15959</a>     | interferon-induced protein wit            | <a href="#">Ifit3</a>         | 0.943 | -0.29  | 0.779611  | 0.910547 |
| 13229 | 10566290 |                                    |                           |                                           |                               | 0.943 | -0.953 | 0.371403  | 0.64202  |
| 13230 | 10532164 | <a href="#">ENSMUST00000049628</a> | <a href="#">11958</a>     | ATP synthase, H+ transporting,            | <a href="#">Atp5k</a>         | 0.943 | -1.504 | 0.175092  | 0.428242 |
| 13231 | 10413813 | <a href="#">NM_030166</a>          | <a href="#">78754</a>     | UDP-N-acetyl-alpha-D-galactosa            | <a href="#">Galnt2</a>        | 0.943 | -0.43  | 0.679564  | 0.857705 |
| 13232 | 10507798 | <a href="#">NM_008506</a>          | <a href="#">16918</a>     | v-myc myelocytomatosis viral o            | <a href="#">Myc11</a>         | 0.943 | -1.646 | 0.14245   | 0.38247  |
| 13233 | 10352914 | <a href="#">AK171382</a>           | <a href="#">320400</a>    | RIKEN cDNA A330023F24 gene                | <a href="#">A330023F24Rik</a> | 0.943 | -0.875 | 0.409831  | 0.674303 |
| 13234 | 10398665 | <a href="#">NM_009396</a>          | <a href="#">21928</a>     | tumor necrosis factor, alpha-i            | <a href="#">Tnfaip2</a>       | 0.943 | -1.223 | 0.2598    | 0.53415  |
| 13235 | 10357932 | <a href="#">NM_001081307</a>       | <a href="#">329251</a>    | protein phosphatase 1, regulat            | <a href="#">Ppp1r12b</a>      | 0.943 | -0.263 | 0.799675  | 0.919181 |
| 13236 | 10477673 | <a href="#">NM_001085378</a>       | <a href="#">668940</a>    | myosin, heavy chain 7B, cardia            | <a href="#">Myh7b</a>         | 0.943 | -1.02  | 0.340684  | 0.615782 |
| 13237 | 10559694 | <a href="#">ENSMUST00000032598</a> | <a href="#">381836</a>    | gene model 1079, (NCBI)                   | <a href="#">Gm1079</a>        | 0.943 | -0.823 | 0.436704  | 0.696302 |
| 13238 | 10597513 |                                    |                           |                                           |                               | 0.943 | -0.59  | 0.572951  | 0.796481 |
| 13239 | 10353028 | <a href="#">NM_173443</a>          | <a href="#">70675</a>     | valosin containing protein (p9            | <a href="#">Vcpip1</a>        | 0.943 | -1.532 | 0.168094  | 0.4195   |
| 13240 | 10443215 | <a href="#">NM_011432</a>          | <a href="#">20630</a>     | UI small nuclear ribonucleopro            | <a href="#">Snrpe</a>         | 0.943 | -1.118 | 0.299325  | 0.575408 |
| 13241 | 10569870 | <a href="#">NM_022984</a>          | <a href="#">57264</a>     | resistin                                  | <a href="#">Retn</a>          | 0.943 | -0.463 | 0.657052  | 0.846548 |
| 13242 | 10558295 | <a href="#">ENSMUST00000106157</a> | <a href="#">360216</a>    | zinc finger, RAN-binding domai            | <a href="#">Zranb1</a>        | 0.943 | -1.025 | 0.338688  | 0.614222 |
| 13243 | 10517436 | <a href="#">NM_025411</a>          | <a href="#">66193</a>     | RIKEN cDNA 1110049F12 gene                | <a href="#">1110049F12Rik</a> | 0.943 | -1.307 | 0.231222  | 0.501993 |
| 13244 | 10393851 | <a href="#">NM_024229</a>          | <a href="#">68671</a>     | phosphate cytidyltransferase              | <a href="#">Pcyt2</a>         | 0.943 | -1.441 | 0.19144   | 0.450707 |
| 13245 | 10383819 | <a href="#">NM_144520</a>          | <a href="#">67815</a>     | SEC14-like 2 (S. cerevisiae)              | <a href="#">Sec14l2</a>       | 0.943 | -0.608 | 0.561916  | 0.788974 |
| 13246 | 10571170 | <a href="#">NM_173212</a>          | <a href="#">108043</a>    | cholinergic receptor, nicotini            | <a href="#">Chrnb3</a>        | 0.943 | -1.241 | 0.25338   | 0.527654 |
| 13247 | 10535771 | <a href="#">NM_007673</a>          | <a href="#">12591</a>     | caudal type homeo box 2                   | <a href="#">Cdx2</a>          | 0.943 | -0.484 | 0.64262   | 0.838146 |
| 13248 | 10399687 |                                    |                           |                                           |                               | 0.943 | -0.622 | 0.553111  | 0.782691 |
| 13249 | 10470547 | <a href="#">NM_080452</a>          | <a href="#">118451</a>    | mitochondrial ribosomal protei            | <a href="#">Mrps2</a>         | 0.943 | -1.615 | 0.149184  | 0.391598 |
| 13250 | 10572301 | <a href="#">NM_008578</a>          | <a href="#">17259</a>     | myocyte enhancer factor 2B                | <a href="#">Mef2b</a>         | 0.943 | -1.793 | 0.11479   | 0.336959 |
| 13251 | 10363905 | <a href="#">NM_025635</a>          | <a href="#">52696</a>     | ZW10 interactor                           | <a href="#">Zwint</a>         | 0.943 | -1.115 | 0.300681  | 0.576863 |
| 13252 | 10470788 | <a href="#">NM_001113213</a>       | <a href="#">18286</a>     | outer dense fiber of sperm tai            | <a href="#">Odf2</a>          | 0.943 | -1.283 | 0.239089  | 0.511826 |
| 13253 | 10414175 | <a href="#">XM_001474680</a>       | <a href="#">100040439</a> | similar to isolog of yeast sui            | <a href="#">LOC100040439</a>  | 0.943 | -1.044 | 0.330285  | 0.606542 |
| 13254 | 10410279 | <a href="#">ENSMUST00000091526</a> | <a href="#">432769</a>    | zinc finger protein 708                   | <a href="#">Zfp708</a>        | 0.943 | -0.603 | 0.564675  | 0.790747 |
| 13255 | 10578191 |                                    |                           |                                           |                               | 0.943 | -0.95  | 0.372727  | 0.643093 |
| 13256 | 10568011 | <a href="#">AK153779</a>           | <a href="#">68681</a>     | RIKEN cDNA 1110030E23 gene                | <a href="#">1110030E23Rik</a> | 0.943 | -0.38  | 0.71456   | 0.875126 |
| 13257 | 10566264 | <a href="#">ENSMUST00000106866</a> | <a href="#">436003</a>    | predicted gene, EG436003                  | <a href="#">EG436003</a>      | 0.943 | -0.405 | 0.697487  | 0.867333 |
| 13258 | 10366519 | <a href="#">AK077360</a>           | <a href="#">327824</a>    | RIKEN cDNA 5330438D12 gene                | <a href="#">5330438D12Rik</a> | 0.943 | -0.659 | 0.530634  | 0.765382 |
| 13259 | 10558600 | <a href="#">NM_199301</a>          | <a href="#">212508</a>    | mitochondrial GTPase 1                    | <a href="#">Mtg1</a>          | 0.943 | -1.756 | 0.121226  | 0.347818 |
| 13260 | 10438575 | <a href="#">NM_023737</a>          | <a href="#">74147</a>     | homolog<br>enoyl-Coenzyme A, hydratase/3- | <a href="#">Ehhadh</a>        | 0.943 | -0.6   | 0.56658   | 0.792358 |
| 13261 | 10388296 | <a href="#">NM_146710</a>          | <a href="#">258705</a>    | olfactory receptor 398                    | <a href="#">Olfr398</a>       | 0.943 | -0.592 | 0.571838  | 0.79598  |
| 13262 | 10547513 | <a href="#">NM_144815</a>          | <a href="#">214932</a>    | cat eye syndrome chromosome re            | <a href="#">Cecr5</a>         | 0.943 | -0.487 | 0.640958  | 0.837375 |
| 13263 | 10493076 | <a href="#">NM_021309</a>          | <a href="#">27371</a>     | SH2 domain protein 2A                     | <a href="#">Sh2d2a</a>        | 0.943 | -1.156 | 0.284521  | 0.559679 |
| 13264 | 10444505 | <a href="#">NM_001045864</a>       | <a href="#">27632</a>     | RD RNA-binding protein                    | <a href="#">Rdbp</a>          | 0.943 | -1.995 | 0.0850371 | 0.280082 |
| 13265 | 10522024 | <a href="#">NM_019636</a>          | <a href="#">57915</a>     | TBC1 domain family, member 1              | <a href="#">Tbc1d1</a>        | 0.943 | -0.737 | 0.484637  | 0.733146 |
| 13266 | 10389754 | <a href="#">NM_172534</a>          | <a href="#">214604</a>    | RIKEN cDNA 4932411E22 gene                | <a href="#">4932411E22Rik</a> | 0.943 | -0.198 | 0.848597  | 0.938624 |
| 13267 | 10511588 | <a href="#">NM_177861</a>          | <a href="#">39795</a>     | transmembrane protein 67                  | <a href="#">Tmem67</a>        | 0.943 | -1.177 | 0.276454  | 0.551448 |

|       |          |                                    |                        |                                |                                    |       |        |           |          |
|-------|----------|------------------------------------|------------------------|--------------------------------|------------------------------------|-------|--------|-----------|----------|
| 13268 | 10552540 | <a href="#">NM_174865</a>          | <a href="#">317652</a> | kallikrein related-peptidase 1 | <a href="#">Klk15</a>              | 0.943 | -0.326 | 0.753533  | 0.896207 |
| 13269 | 10390319 | <a href="#">NM_027026</a>          | <a href="#">69297</a>  | leucine rich repeat containing | <a href="#">Lrrc46</a>             | 0.943 | -1.127 | 0.295815  | 0.572251 |
| 13270 | 10471569 |                                    |                        |                                |                                    | 0.943 | -1.276 | 0.241541  | 0.514365 |
| 13271 | 10450682 | <a href="#">NM_010398</a>          | <a href="#">15040</a>  | histocompatibility 2, T region | <a href="#">H2-T23</a>             | 0.943 | -0.625 | 0.55152   | 0.781591 |
| 13272 | 10491753 | <a href="#">NM_175515</a>          | <a href="#">380614</a> | inturned planar cell polarity  | <a href="#">Intu</a>               | 0.943 | -1.495 | 0.177283  | 0.431715 |
| 13273 | 10440708 | <a href="#">XM_925382</a>          | <a href="#">621595</a> | keratin associated protein 19- | <a href="#">Krtap19-7</a>          | 0.943 | -0.468 | 0.653761  | 0.844785 |
| 13274 | 10537826 | <a href="#">NM_146653</a>          | <a href="#">258647</a> | olfactory receptor 435         | <a href="#">Olfr435</a>            | 0.943 | -0.934 | 0.380542  | 0.650143 |
| 13275 | 10437243 | <a href="#">NM_019453</a>          | <a href="#">54483</a>  | Mediterranean fever            | <a href="#">Mefv</a>               | 0.943 | -0.709 | 0.500367  | 0.743431 |
| 13276 | 10598456 | <a href="#">NM_138604</a>          | <a href="#">54644</a>  | OTU domain containing 5        | <a href="#">Otud5</a>              | 0.943 | -1.562 | 0.161089  | 0.40899  |
| 13277 | 10500218 | <a href="#">NM_027931</a>          | <a href="#">71807</a>  | threonyl-tRNA synthetase 2, mi | <a href="#">Tars2</a>              | 0.943 | -0.697 | 0.507613  | 0.749509 |
| 13278 | 10361882 | <a href="#">NM_173390</a>          | <a href="#">215819</a> | NHS-like 1                     | <a href="#">Nhs1l</a>              | 0.943 | -1.388 | 0.206634  | 0.47111  |
| 13279 | 10348775 | <a href="#">NM_023200</a>          | <a href="#">66385</a>  | protein phosphatase 1, regulat | <a href="#">Ppp1r7</a>             | 0.943 | -1.051 | 0.327308  | 0.603524 |
| 13280 | 10471443 | <a href="#">NM_198191</a>          | <a href="#">227733</a> | phosphatidylinositol-4-phospha | <a href="#">Pip5k1l</a>            | 0.943 | -0.881 | 0.406781  | 0.671322 |
| 13281 | 10492662 |                                    |                        |                                |                                    | 0.943 | -1.047 | 0.328991  | 0.605314 |
| 13282 | 10427323 | <a href="#">NM_019817</a>          | <a href="#">56447</a>  | coatomer protein complex, subu | <a href="#">Copz1</a>              | 0.943 | -0.835 | 0.43028   | 0.691063 |
| 13283 | 10401283 | <a href="#">ENSMUST00000056602</a> | <a href="#">68354</a>  | RIKEN cDNA 0610009B14 gene     | <a href="#">0610009B14Rik</a>      | 0.943 | -0.741 | 0.48211   | 0.730954 |
| 13284 | 10371293 | <a href="#">ENSMUST00000079648</a> | <a href="#">544717</a> | RIKEN cDNA 1190007I07 gene     | <a href="#">1190007I07Rik</a>      | 0.943 | -0.455 | 0.662618  | 0.849733 |
| 13285 | 10576249 | <a href="#">NM_177279</a>          | <a href="#">320869</a> | RIKEN cDNA 4732415M23 gene     | <a href="#">4732415M23Rik</a>      | 0.943 | -1.2   | 0.268013  | 0.542786 |
| 13286 | 10457967 | <a href="#">NM_032394</a>          | <a href="#">17922</a>  | myosin VIIb                    | <a href="#">Myo7b</a>              | 0.943 | -0.524 | 0.615697  | 0.822286 |
| 13287 | 10494452 | <a href="#">NM_001102407</a>       | <a href="#">60365</a>  | RNA binding motif protein 8a   | <a href="#">Rbm8a</a>              | 0.943 | -1.111 | 0.30231   | 0.578465 |
| 13288 | 10450384 | <a href="#">NM_013600</a>          | <a href="#">17687</a>  | mutS homolog 5 (E. coli)       | <a href="#">Msh5</a>               | 0.943 | -0.582 | 0.578397  | 0.798316 |
| 13289 | 10376755 | <a href="#">NM_021349</a>          | <a href="#">57916</a>  | tumor necrosis factor receptor | <a href="#">Tnfrsf13b</a>          | 0.943 | -0.798 | 0.450202  | 0.707462 |
| 13290 | 10607475 | <a href="#">NM_016764</a>          | <a href="#">53381</a>  | peroxiredoxin 4                | <a href="#">Prdx4</a>              | 0.943 | -2.068 | 0.0762992 | 0.261682 |
| 13291 | 10552740 | <a href="#">NM_053074</a>          | <a href="#">18226</a>  | nucleoporin 62                 | <a href="#">Nup62</a>              | 0.943 | -1.27  | 0.243387  | 0.51639  |
| 13292 | 10393239 |                                    |                        |                                |                                    | 0.943 | -1.068 | 0.319847  | 0.596635 |
| 13293 | 10488558 | <a href="#">NM_198214</a>          | <a href="#">241727</a> | syntaphilin                    | <a href="#">Snph</a>               | 0.943 | -0.934 | 0.380519  | 0.650143 |
| 13294 | 10369116 | <a href="#">NM_027830</a>          | <a href="#">71567</a>  | minichromosome maintenance     | <a href="#">Mcm9</a>               | 0.943 | -0.87  | 0.412456  | 0.676163 |
| 13295 | 10417946 | <a href="#">AK018074</a>           | <a href="#">76133</a>  | RIKEN cDNA 6230400D17 gene     | <a href="#">6230400D17Rik</a>      | 0.943 | -1.169 | 0.279445  | 0.554692 |
| 13296 | 10442786 | <a href="#">NM_010781</a>          | <a href="#">17229</a>  | tryptase beta 2                | <a href="#">Tpsb2</a>              | 0.943 | -0.923 | 0.385616  | 0.654706 |
| 13297 | 10452525 | <a href="#">NM_028388</a>          | <a href="#">72900</a>  | NADH dehydrogenase (ubiquinone | <a href="#">Ndufv2</a>             | 0.943 | -1.695 | 0.132712  | 0.366423 |
| 13298 | 10406672 | <a href="#">NM_009712</a>          | <a href="#">11881</a>  | arylsulfatase B                | <a href="#">Arso</a>               | 0.943 | -1.179 | 0.275887  | 0.550733 |
| 13299 | 10490352 | <a href="#">NM_001081092</a>       | <a href="#">228980</a> | TAF4A RNA polymerase II, TATA  | <a href="#">Taf4a</a>              | 0.943 | -0.491 | 0.637831  | 0.835893 |
| 13300 | 10510150 | <a href="#">BC085112</a>           | <a href="#">433804</a> | predicted gene, OTTMUSG0000001 | <a href="#">OTTMUSG00000010673</a> | 0.943 | -1.035 | 0.33409   | 0.609656 |
| 13301 | 10472649 | <a href="#">NM_177376</a>          | <a href="#">329421</a> | myosin IIIB                    | <a href="#">Myo3b</a>              | 0.943 | -0.502 | 0.630481  | 0.831639 |
| 13302 | 10429298 | <a href="#">NM_180662</a>          | <a href="#">76510</a>  | trafficking protein particle c | <a href="#">Trappc9</a>            | 0.943 | -1.204 | 0.266603  | 0.541262 |
| 13303 | 10407097 | <a href="#">NM_011056</a>          | <a href="#">238871</a> | phosphodiesterase 4D, cAMP spe | <a href="#">Pde4d</a>              | 0.943 | -0.828 | 0.434277  | 0.694762 |
| 13304 | 10374821 | <a href="#">NM_134034</a>          | <a href="#">104570</a> | SMEK homolog 2, suppressor of  | <a href="#">Smek2</a>              | 0.943 | -1.315 | 0.22885   | 0.499928 |
| 13305 | 10599663 | <a href="#">BC115663</a>           | <a href="#">75013</a>  | RIKEN cDNA 4930502E18 gene     | <a href="#">4930502E18Rik</a>      | 0.943 | -0.345 | 0.740133  | 0.889339 |
| 13306 | 10461826 |                                    |                        |                                |                                    | 0.943 | -0.219 | 0.832373  | 0.932679 |
| 13307 | 10443087 |                                    |                        |                                |                                    | 0.943 | -0.541 | 0.604543  | 0.815416 |
| 13308 | 10377473 | <a href="#">NM_011786</a>          | <a href="#">23801</a>  | arachidonate lipoxigenase 3    | <a href="#">Aloxe3</a>             | 0.943 | -0.424 | 0.683619  | 0.859974 |
| 13309 | 10505614 | <a href="#">NM_031202</a>          | <a href="#">22178</a>  | tyrosinase-related protein 1   | <a href="#">Tyrl</a>               | 0.943 | -0.491 | 0.638208  | 0.835923 |
| 13310 | 10432281 | <a href="#">NM_016781</a>          | <a href="#">19082</a>  | protein kinase, AMP-activated, | <a href="#">Prkag1</a>             | 0.943 | -0.938 | 0.378395  | 0.648204 |
| 13311 | 10553092 | <a href="#">NM_016974</a>          | <a href="#">13170</a>  | D site albumin promoter bindin | <a href="#">Dbp</a>                | 0.942 | -0.927 | 0.384054  | 0.653452 |
| 13312 | 10458138 | <a href="#">NM_030147</a>          | <a href="#">78656</a>  | bromodomain containing 8       | <a href="#">Brd8</a>               | 0.942 | -1.405 | 0.201628  | 0.464202 |
| 13313 | 10436041 |                                    |                        |                                |                                    | 0.942 | -1.528 | 0.169009  | 0.420416 |
| 13314 | 10450948 | <a href="#">BC132063</a>           | <a href="#">71583</a>  | RIKEN cDNA 9130008F23 gene     | <a href="#">9130008F23Rik</a>      | 0.942 | -0.993 | 0.352692  | 0.625772 |
| 13315 | 10400299 | <a href="#">NM_008159</a>          | <a href="#">14762</a>  | G protein-coupled receptor 33  | <a href="#">Gpr33</a>              | 0.942 | -0.366 | 0.724521  | 0.880619 |
| 13316 | 10394068 | <a href="#">NM_145373</a>          | <a href="#">209588</a> | secreted and transmembrane 1A  | <a href="#">Sectm1a</a>            | 0.942 | -0.318 | 0.759833  | 0.899364 |
| 13317 | 10417124 | <a href="#">BC096543</a>           | <a href="#">320268</a> | RIKEN cDNA B930095G15          | <a href="#">B930095G15Rik</a>      | 0.942 | -0.788 | 0.456061  | 0.712435 |

|       |          |                                    |                        | gene                              |                                    |       |        |           |          |
|-------|----------|------------------------------------|------------------------|-----------------------------------|------------------------------------|-------|--------|-----------|----------|
| 13318 | 10571680 | <a href="#">NM_027973</a>          | <a href="#">71876</a>  | myeloid leukemia factor 1 inte    | <a href="#">Mlf1ip</a>             | 0.942 | -1.216 | 0.262417  | 0.536908 |
| 13319 | 10364317 |                                    |                        |                                   |                                    | 0.942 | -0.36  | 0.728976  | 0.882586 |
| 13320 | 10532937 | <a href="#">NM_175352</a>          | <a href="#">106840</a> | unc-119 homolog B (C. elegans)    | <a href="#">Unc119b</a>            | 0.942 | -1.196 | 0.269586  | 0.544449 |
| 13321 | 10450508 | <a href="#">NM_010735</a>          | <a href="#">16992</a>  | lymphotoxin A                     | <a href="#">Lta</a>                | 0.942 | -0.139 | 0.893024  | 0.957774 |
| 13322 | 10520869 | <a href="#">NM_001081407</a>       | <a href="#">665270</a> | phospholipase B1                  | <a href="#">Plb1</a>               | 0.942 | -0.754 | 0.474787  | 0.726456 |
| 13323 | 10447786 | <a href="#">NM_009202</a>          | <a href="#">20517</a>  | solute carrier family 22 (orga    | <a href="#">Slc22a1</a>            | 0.942 | -0.85  | 0.422727  | 0.68502  |
| 13324 | 10489151 | <a href="#">NM_001039557</a>       | <a href="#">629499</a> | RIKEN cDNA 4922505G16<br>gene     | <a href="#">4922505G16Rik</a>      | 0.942 | -0.947 | 0.37424   | 0.644376 |
| 13325 | 10354803 |                                    |                        |                                   |                                    | 0.942 | -0.881 | 0.40654   | 0.671151 |
| 13326 | 10369920 | <a href="#">BC055322</a>           | <a href="#">192734</a> | expressed sequence AI646023       | <a href="#">AI646023</a>           | 0.942 | -0.969 | 0.364067  | 0.635449 |
| 13327 | 10571763 | <a href="#">ENSMUST00000033963</a> | <a href="#">75359</a>  | RIKEN cDNA 4930555F03 gene        | <a href="#">4930555F03Rik</a>      | 0.942 | -0.631 | 0.547489  | 0.778461 |
| 13328 | 10463505 | <a href="#">NM_172639</a>          | <a href="#">226162</a> | RIKEN cDNA 5330431N19<br>gene     | <a href="#">5330431N19Rik</a>      | 0.942 | -0.829 | 0.433633  | 0.694075 |
| 13329 | 10364932 | <a href="#">NM_001081688</a>       | <a href="#">432478</a> | transmembrane protease, serine    | <a href="#">Tmprss9</a>            | 0.942 | -0.974 | 0.361601  | 0.633308 |
| 13330 | 10388786 | <a href="#">NM_009297</a>          | <a href="#">20926</a>  | suppressor of Ty 6 homolog (S.    | <a href="#">Supt6h</a>             | 0.942 | -1.44  | 0.191835  | 0.451135 |
| 13331 | 10472630 | <a href="#">NM_001081548</a>       | <a href="#">68795</a>  | zinc finger protein 650           | <a href="#">Zfp650</a>             | 0.942 | -1.568 | 0.159648  | 0.407016 |
| 13332 | 10504072 | <a href="#">NM_175138</a>          | <a href="#">68922</a>  | dynein, axonemal, intermediate    | <a href="#">Dnaic1</a>             | 0.942 | -1.67  | 0.137632  | 0.374771 |
| 13333 | 10399579 | <a href="#">ENSMUST00000075542</a> | <a href="#">69513</a>  | RIKEN cDNA 1700030C10<br>gene     | <a href="#">1700030C10Rik</a>      | 0.942 | -0.724 | 0.492042  | 0.738272 |
| 13334 | 10545271 | <a href="#">NM_178413</a>          | <a href="#">232078</a> | threonine synthase-like 2 (bac    | <a href="#">Thnsl2</a>             | 0.942 | -0.557 | 0.594331  | 0.808582 |
| 13335 | 10390050 | <a href="#">NM_177752</a>          | <a href="#">268465</a> | essential meiotic endonuclease    | <a href="#">Eme1</a>               | 0.942 | -1.27  | 0.243491  | 0.51649  |
| 13336 | 10428124 | <a href="#">XM_891200</a>          | <a href="#">626596</a> | regulator of G-protein signall    | <a href="#">Rgs22</a>              | 0.942 | -0.734 | 0.485994  | 0.734018 |
| 13337 | 10399593 | <a href="#">NM_008403</a>          | <a href="#">16413</a>  | integrin beta 1 binding protei    | <a href="#">Itgb1bp1</a>           | 0.942 | -0.751 | 0.476285  | 0.727471 |
| 13338 | 10419465 | <a href="#">NM_001111119</a>       | <a href="#">239083</a> | cyclin B1 interacting protein     | <a href="#">Ccnb1ip1</a>           | 0.942 | -0.341 | 0.742487  | 0.890277 |
| 13339 | 10568339 | <a href="#">NM_001081374</a>       | <a href="#">77613</a>  | protease, serine, 36              | <a href="#">Prss36</a>             | 0.942 | -0.507 | 0.627083  | 0.830395 |
| 13340 | 10589955 |                                    |                        |                                   |                                    | 0.942 | -0.66  | 0.529861  | 0.765154 |
| 13341 | 10531633 | <a href="#">NM_001077265</a>       | <a href="#">11991</a>  | heterogeneous nuclear ribonucl    | <a href="#">Hnrmpd</a>             | 0.942 | -1.457 | 0.187108  | 0.445468 |
| 13342 | 10529154 | <a href="#">ENSMUST00000068997</a> | <a href="#">621407</a> | predicted gene,<br>ENSMUSG0000005 | <a href="#">ENSMUSG00000055424</a> | 0.942 | -0.821 | 0.437762  | 0.696939 |
| 13343 | 10541290 | <a href="#">NM_028730</a>          | <a href="#">74043</a>  | peroxisome biogenesis factor 2    | <a href="#">Pex26</a>              | 0.942 | -1.068 | 0.320169  | 0.596972 |
| 13344 | 10586240 | <a href="#">XM_001476259</a>       | <a href="#">102442</a> | DENN/MADD domain<br>containing 4A | <a href="#">Dennd4a</a>            | 0.942 | 0.082  | 0.936901  | 0.975366 |
| 13345 | 10533213 | <a href="#">NM_145226</a>          | <a href="#">246727</a> | 2'-5' oligoadenylate synthetas    | <a href="#">Oas3</a>               | 0.942 | -0.292 | 0.778628  | 0.909988 |
| 13346 | 10421661 | <a href="#">NM_026816</a>          | <a href="#">68705</a>  | general transcription factor I    | <a href="#">Gtf2f2</a>             | 0.942 | -0.847 | 0.423949  | 0.686158 |
| 13347 | 10394358 | <a href="#">BC068281</a>           | <a href="#">238037</a> | cDNA sequence BC068281            | <a href="#">BC068281</a>           | 0.942 | -0.819 | 0.439206  | 0.698449 |
| 13348 | 10606941 | <a href="#">NM_001037915</a>       | <a href="#">622473</a> | rippy1 homolog (zebrafish)        | <a href="#">Ripply1</a>            | 0.942 | -0.56  | 0.592379  | 0.807145 |
| 13349 | 10524234 | <a href="#">NM_198306</a>          | <a href="#">231605</a> | UDP-N-acetyl-alpha-D-galactosa    | <a href="#">Galnt9</a>             | 0.942 | -0.924 | 0.385463  | 0.654637 |
| 13350 | 10478432 | <a href="#">NM_001114079</a>       | <a href="#">381404</a> | RIKEN cDNA 1810053B01<br>gene     | <a href="#">1810053B01Rik</a>      | 0.942 | -1.106 | 0.304057  | 0.58039  |
| 13351 | 10490621 | <a href="#">NM_011481</a>          | <a href="#">20811</a>  | src-related kinase lacking C-t    | <a href="#">Srms</a>               | 0.942 | -0.283 | 0.785485  | 0.912507 |
| 13352 | 10477852 | <a href="#">XM_001481161</a>       | <a href="#">632394</a> | similar to Rpl37a protein         | <a href="#">LOC632394</a>          | 0.942 | -1.305 | 0.231909  | 0.502663 |
| 13353 | 10605355 |                                    |                        |                                   |                                    | 0.942 | -0.358 | 0.730462  | 0.883456 |
| 13354 | 10515431 | <a href="#">NM_134471</a>          | <a href="#">73804</a>  | kinesin family member 2C          | <a href="#">Kif2c</a>              | 0.942 | -1.123 | 0.297572  | 0.573709 |
| 13355 | 10413930 | <a href="#">BC117714</a>           | <a href="#">105511</a> | RIKEN cDNA 4922501K12<br>gene     | <a href="#">4922501K12Rik</a>      | 0.942 | -0.477 | 0.647673  | 0.841423 |
| 13356 | 10444298 | <a href="#">NM_010382</a>          | <a href="#">14969</a>  | histocompatibility 2, class II    | <a href="#">H2-Eb1</a>             | 0.942 | -0.303 | 0.770375  | 0.905061 |
| 13357 | 10473219 |                                    |                        |                                   |                                    | 0.942 | -0.118 | 0.908998  | 0.963765 |
| 13358 | 10389654 | <a href="#">NM_007946</a>          | <a href="#">13861</a>  | eosinophil peroxidase             | <a href="#">Epx</a>                | 0.942 | -0.898 | 0.398247  | 0.664555 |
| 13359 | 10486203 | <a href="#">NM_026574</a>          | <a href="#">68142</a>  | INO80 complex homolog 1 (S.<br>ce | <a href="#">Inoc1</a>              | 0.942 | -1.454 | 0.188094  | 0.446224 |
| 13360 | 10489341 |                                    |                        |                                   |                                    | 0.942 | -0.349 | 0.737033  | 0.887765 |
| 13361 | 10465260 | <a href="#">NM_198634</a>          | <a href="#">332359</a> | tigger transposable element de    | <a href="#">Tigd3</a>              | 0.942 | -0.699 | 0.506215  | 0.74808  |
| 13362 | 10446679 | <a href="#">AY820307</a>           | <a href="#">70891</a>  | speedy homolog A (Drosophila)     | <a href="#">Spdya</a>              | 0.942 | -2.422 | 0.0449439 | 0.187583 |
| 13363 | 10505438 | <a href="#">NM_008768</a>          | <a href="#">18405</a>  | orosomuroid 1                     | <a href="#">Orm1</a>               | 0.942 | -0.29  | 0.77999   | 0.910713 |
| 13364 | 10354216 | <a href="#">AK133372</a>           | <a href="#">619289</a> | RIKEN cDNA 4933400N17<br>gene     | <a href="#">4933400N17Rik</a>      | 0.942 | -0.301 | 0.771739  | 0.905831 |
| 13365 | 10518163 |                                    |                        |                                   |                                    | 0.942 | -1.119 | 0.29908   | 0.575096 |
| 13366 | 10447437 | <a href="#">NM_028658</a>          | <a href="#">73825</a>  | coiled-coil domain containing     | <a href="#">Ccdc128</a>            | 0.942 | -1.526 | 0.169484  | 0.420889 |

|       |          |                                    |                           |                                |                                    |       |        |           |          |
|-------|----------|------------------------------------|---------------------------|--------------------------------|------------------------------------|-------|--------|-----------|----------|
| 13367 | 10402864 | <a href="#">BC018315</a>           | <a href="#">16019</a>     | immunoglobulin heavy chain 6 ( | <a href="#">Igh-6</a>              | 0.942 | -0.843 | 0.426417  | 0.687967 |
| 13368 | 10436206 | <a href="#">ENSMUST00000023314</a> | <a href="#">78639</a>     | RIKEN cDNA 1700116B05 gene     | <a href="#">1700116B05Rik</a>      | 0.942 | -0.469 | 0.652858  | 0.844541 |
| 13369 | 10360540 | <a href="#">AK015919</a>           | <a href="#">75164</a>     | RIKEN cDNA 4930527J03 gene     | <a href="#">4930527J03Rik</a>      | 0.942 | -0.879 | 0.407531  | 0.671878 |
| 13370 | 10502961 | <a href="#">NM_010713</a>          | <a href="#">16875</a>     | LIM homeobox protein 8         | <a href="#">Lhx8</a>               | 0.942 | -1.119 | 0.298875  | 0.574963 |
| 13371 | 10428002 | <a href="#">ENSMUST00000075576</a> | <a href="#">67434</a>     | RIKEN cDNA 5730557B15 gene     | <a href="#">5730557B15Rik</a>      | 0.942 | -0.649 | 0.536315  | 0.769429 |
| 13372 | 10568374 | <a href="#">NM_177001</a>          | <a href="#">100043133</a> | RIKEN cDNA 9130023H24 gene     | <a href="#">9130023H24Rik</a>      | 0.942 | -1.311 | 0.230157  | 0.501074 |
| 13373 | 10384373 | <a href="#">NM_021891</a>          | <a href="#">60530</a>     | fidgetin-like 1                | <a href="#">Fignl1</a>             | 0.941 | -1.231 | 0.256834  | 0.531151 |
| 13374 | 10558468 | <a href="#">BC119557</a>           | <a href="#">74004</a>     | RIKEN cDNA 6330417G02 gene     | <a href="#">6330417G02Rik</a>      | 0.941 | -0.677 | 0.519685  | 0.757547 |
| 13375 | 10411927 | <a href="#">NM_026072</a>          | <a href="#">67285</a>     | serologically defined colon ca | <a href="#">Sdccag10</a>           | 0.941 | -1.631 | 0.14559   | 0.387145 |
| 13376 | 10536746 | <a href="#">NM_007480</a>          | <a href="#">11844</a>     | ADP-ribosylation factor 5      | <a href="#">Arf5</a>               | 0.941 | -1.082 | 0.314059  | 0.590842 |
| 13377 | 10425265 | <a href="#">ENSMUST00000100455</a> | <a href="#">100038350</a> | predicted gene, ENSMUSG0000007 | <a href="#">ENSMUSG00000075555</a> | 0.941 | -0.743 | 0.480967  | 0.730572 |
| 13378 | 10360306 | <a href="#">NM_029084</a>          | <a href="#">74748</a>     | SLAM family member 8           | <a href="#">Slamf8</a>             | 0.941 | -0.56  | 0.592342  | 0.807145 |
| 13379 | 10498413 |                                    |                           |                                |                                    | 0.941 | -0.903 | 0.39587   | 0.663413 |
| 13380 | 10552444 | <a href="#">NM_028913</a>          | <a href="#">74400</a>     | zinc finger protein 819        | <a href="#">Zfp819</a>             | 0.941 | -0.81  | 0.444015  | 0.702635 |
| 13381 | 10495371 | <a href="#">ENSMUST00000062935</a> | <a href="#">329738</a>    | RIKEN cDNA 4921525H12 gene     | <a href="#">4921525H12Rik</a>      | 0.941 | -0.809 | 0.444198  | 0.702635 |
| 13382 | 10360324 | <a href="#">XR_030924</a>          | <a href="#">100045972</a> | similar to high mobility group | <a href="#">LOC100045972</a>       | 0.941 | -0.858 | 0.41824   | 0.680775 |
| 13383 | 10426991 | <a href="#">NM_144790</a>          | <a href="#">208258</a>    | ankyrin repeat domain 33       | <a href="#">Ankrd33</a>            | 0.941 | -0.953 | 0.371307  | 0.64202  |
| 13384 | 10557754 | <a href="#">NM_198424</a>          | <a href="#">269999</a>    | ORAI calcium release-activated | <a href="#">Orai3</a>              | 0.941 | -1.156 | 0.284663  | 0.559847 |
| 13385 | 10495592 |                                    |                           |                                |                                    | 0.941 | -0.776 | 0.462248  | 0.716783 |
| 13386 | 10571065 | <a href="#">NM_008432</a>          | <a href="#">16532</a>     | potassium channel, subfamily U | <a href="#">Kcnu1</a>              | 0.941 | -0.845 | 0.425388  | 0.68733  |
| 13387 | 10400383 | <a href="#">BC056967</a>           | <a href="#">72658</a>     | RIKEN cDNA 2700097O09 gene     | <a href="#">2700097O09Rik</a>      | 0.941 | -1.072 | 0.318414  | 0.595538 |
| 13388 | 10357604 | <a href="#">NM_019777</a>          | <a href="#">56489</a>     | inhibitor of kappaB kinase eps | <a href="#">Ikbke</a>              | 0.941 | -0.988 | 0.355067  | 0.627756 |
| 13389 | 10397561 | <a href="#">NM_028105</a>          | <a href="#">72113</a>     | aarF domain containing kinase  | <a href="#">Adck1</a>              | 0.941 | -1.057 | 0.324617  | 0.601113 |
| 13390 | 10392241 | <a href="#">NM_015810</a>          | <a href="#">50776</a>     | polymerase (DNA directed), gam | <a href="#">Polg2</a>              | 0.941 | -0.473 | 0.650159  | 0.843113 |
| 13391 | 10512621 | <a href="#">NM_019485</a>          | <a href="#">56014</a>     | olfactory receptor 70          | <a href="#">Olfir70</a>            | 0.941 | -0.619 | 0.554869  | 0.783816 |
| 13392 | 10515755 | <a href="#">NM_001122949</a>       | <a href="#">17480</a>     | myeloproliferative leukemia vi | <a href="#">Mpl</a>                | 0.941 | -0.406 | 0.696202  | 0.866574 |
| 13393 | 10379346 | <a href="#">NM_199196</a>          | <a href="#">52615</a>     | suppressor of zeste 12 homolog | <a href="#">Suz12</a>              | 0.941 | -1.466 | 0.184944  | 0.44255  |
| 13394 | 10591726 | <a href="#">NM_012029</a>          | <a href="#">26940</a>     | ECSIT homolog (Drosophila)     | <a href="#">Ecsit</a>              | 0.941 | -1.295 | 0.235246  | 0.50678  |
| 13395 | 10517081 | <a href="#">XM_620107</a>          | <a href="#">545683</a>    | similar to ribosomal protein   | <a href="#">LOC545683</a>          | 0.941 | -0.745 | 0.480041  | 0.729941 |
| 13396 | 10432215 | <a href="#">NM_001080981</a>       | <a href="#">74351</a>     | DEAD (Asp-Glu-Ala-Asp) box pol | <a href="#">Ddx23</a>              | 0.941 | -1.932 | 0.0934656 | 0.296462 |
| 13397 | 10562729 |                                    |                           |                                |                                    | 0.941 | -0.9   | 0.397287  | 0.664261 |
| 13398 | 10486107 | <a href="#">NM_009273</a>          | <a href="#">20813</a>     | signal recognition particle 14 | <a href="#">Srp14</a>              | 0.941 | -1.122 | 0.297829  | 0.573889 |
| 13399 | 10544542 | <a href="#">NM_177882</a>          | <a href="#">330301</a>    | zinc finger protein 786        | <a href="#">Zfp786</a>             | 0.941 | -0.733 | 0.486811  | 0.734594 |
| 13400 | 10378030 | <a href="#">ENSMUST00000100923</a> | <a href="#">619299</a>    | RIKEN cDNA 9230020A06 gene     | <a href="#">9230020A06Rik</a>      | 0.941 | -0.949 | 0.373174  | 0.64348  |
| 13401 | 10430400 | <a href="#">NM_130859</a>          | <a href="#">105844</a>    | caspase recruitment domain fam | <a href="#">Card10</a>             | 0.941 | -0.853 | 0.421088  | 0.683517 |
| 13402 | 10377240 | <a href="#">ENSMUST00000084600</a> | <a href="#">544792</a>    | similar to hCG1653800          | <a href="#">LOC544792</a>          | 0.941 | -0.45  | 0.666223  | 0.851266 |
| 13403 | 10475767 | <a href="#">NM_175145</a>          | <a href="#">69470</a>     | transmembrane protein 127      | <a href="#">Tmem127</a>            | 0.941 | -1.216 | 0.262415  | 0.536908 |
| 13404 | 10585535 | <a href="#">NM_027397</a>          | <a href="#">104360</a>    | insulin related protein 2 (isl | <a href="#">Isl2</a>               | 0.941 | -0.982 | 0.35801   | 0.630288 |
| 13405 | 10470050 | <a href="#">NM_007379</a>          | <a href="#">11305</a>     | ATP-binding cassette, sub-fami | <a href="#">Abca2</a>              | 0.941 | -0.987 | 0.355378  | 0.628032 |
| 13406 | 10540705 | <a href="#">NM_134159</a>          | <a href="#">171095</a>    | interleukin 17 receptor C      | <a href="#">Il17rc</a>             | 0.941 | -0.708 | 0.501238  | 0.744202 |
| 13407 | 10416666 | <a href="#">NM_026474</a>          | <a href="#">67955</a>     | SGT1, suppressor of G2 allele  | <a href="#">Sugt1</a>              | 0.941 | -1.845 | 0.106327  | 0.321598 |
| 13408 | 10457091 | <a href="#">NM_144946</a>          | <a href="#">246317</a>    | neuropilin (NRP) and tolloid ( | <a href="#">Neto1</a>              | 0.941 | -0.601 | 0.566293  | 0.79227  |
| 13409 | 10529605 | <a href="#">NM_011716</a>          | <a href="#">22393</a>     | Wolfram syndrome 1 homolog (hu | <a href="#">Wfs1</a>               | 0.941 | -1.439 | 0.192228  | 0.451559 |
| 13410 | 10537343 | <a href="#">BC104375</a>           | <a href="#">77522</a>     | RIKEN cDNA D630002J15 gene     | <a href="#">D630002J15Rik</a>      | 0.941 | -0.45  | 0.665937  | 0.851154 |
| 13411 | 10423740 |                                    |                           |                                |                                    | 0.941 | -0.591 | 0.572699  | 0.796287 |
| 13412 | 10528617 | <a href="#">NM_015739</a>          | <a href="#">231044</a>    | gastrulation brain homeobox 1  | <a href="#">Gbx1</a>               | 0.941 | -1.457 | 0.187325  | 0.445668 |
| 13413 | 10385642 | <a href="#">BC118537</a>           | <a href="#">214779</a>    | RIKEN cDNA 9630041N07 gene     | <a href="#">9630041N07Rik</a>      | 0.941 | -0.828 | 0.434354  | 0.694762 |
| 13414 | 10448192 | <a href="#">XR_033753</a>          | <a href="#">624960</a>    | similar to Y box transcription | <a href="#">LOC624960</a>          | 0.941 | -1.205 | 0.266173  | 0.541183 |
| 13415 | 10402575 | <a href="#">NM_027200</a>          | <a href="#">70050</a>     | degenerative spermatocyte home | <a href="#">Dage2</a>              | 0.941 | -0.060 | 0.364000  | 0.635452 |

|       |          |                                    |                           |                                    |                                    |       |        |           |          |
|-------|----------|------------------------------------|---------------------------|------------------------------------|------------------------------------|-------|--------|-----------|----------|
| 13415 | 10402573 | <a href="#">NM_021222</a>          | <a href="#">10032</a>     | degenerative spermatocyte homo     | <a href="#">Dcgs2</a>              | 0.941 | -0.909 | 0.304077  | 0.033432 |
| 13416 | 10383342 | <a href="#">ENSMUST00000050697</a> | <a href="#">66838</a>     | RIKEN cDNA 0610009L18 gene         | <a href="#">0610009L18Rik</a>      | 0.941 | -0.902 | 0.396227  | 0.663741 |
| 13417 | 10597459 | <a href="#">XR_034079</a>          | <a href="#">665772</a>    | similar to ribosomal protein S     | <a href="#">LOC665772</a>          | 0.941 | -1.646 | 0.142395  | 0.38242  |
| 13418 | 10368370 | <a href="#">XR_032337</a>          | <a href="#">667519</a>    | similar to high mobility group     | <a href="#">LOC667519</a>          | 0.941 | -0.881 | 0.406736  | 0.671301 |
| 13419 | 10606180 | <a href="#">NM_001045541</a>       | <a href="#">621818</a>    | predicted gene,<br>ENSMUSG0000004  | <a href="#">ENSMUSG00000043661</a> | 0.941 | -0.322 | 0.756676  | 0.897871 |
| 13420 | 10396442 | <a href="#">NM_178392</a>          | <a href="#">75627</a>     | small nuclear RNA activating c     | <a href="#">Snape1</a>             | 0.941 | -1.001 | 0.349329  | 0.622835 |
| 13421 | 10425223 | <a href="#">NM_015738</a>          | <a href="#">14429</a>     | galanin receptor 3                 | <a href="#">Galr3</a>              | 0.941 | -1.206 | 0.265989  | 0.54117  |
| 13422 | 10601551 | <a href="#">ENSMUST00000055309</a> | <a href="#">100039300</a> | similar to enhancer of yellow      | <a href="#">LOC100039300</a>       | 0.941 | -0.91  | 0.392361  | 0.660367 |
| 13423 | 10538704 |                                    |                           |                                    |                                    | 0.941 | -0.654 | 0.533454  | 0.767511 |
| 13424 | 10552121 | <a href="#">NM_009596</a>          | <a href="#">11354</a>     | androgen binding protein alpha     | <a href="#">Abpa</a>               | 0.941 | -0.293 | 0.777757  | 0.909562 |
| 13425 | 10600781 | <a href="#">XM_994395</a>          | <a href="#">245516</a>    | predicted gene, EG245516           | <a href="#">EG245516</a>           | 0.941 | -0.407 | 0.6956    | 0.866211 |
| 13426 | 10393844 | <a href="#">NM_011568</a>          | <a href="#">21681</a>     | THO complex 4                      | <a href="#">Thoc4</a>              | 0.941 | -1.3   | 0.233715  | 0.505106 |
| 13427 | 10558533 |                                    |                           |                                    |                                    | 0.941 | -1.171 | 0.278981  | 0.554016 |
| 13428 | 10478554 | <a href="#">NM_001040055</a>       | <a href="#">641368</a>    | predicted gene,<br>OTTMUSG0000001  | <a href="#">OTTMUSG00000016293</a> | 0.941 | -0.591 | 0.572606  | 0.796254 |
| 13429 | 10551587 | <a href="#">BC046530</a>           | <a href="#">320435</a>    | RIKEN cDNA 5830482F20 gene         | <a href="#">5830482F20Rik</a>      | 0.941 | -0.732 | 0.487177  | 0.734936 |
| 13430 | 10393580 | <a href="#">NM_029502</a>          | <a href="#">76025</a>     | calcium activated nucleotidase     | <a href="#">Cant1</a>              | 0.941 | -0.858 | 0.418688  | 0.68129  |
| 13431 | 10421567 | <a href="#">NM_172527</a>          | <a href="#">214254</a>    | nudix (nucleoside diphosphate      | <a href="#">Nudt15</a>             | 0.941 | -0.282 | 0.785541  | 0.912507 |
| 13432 | 10377984 | <a href="#">NM_177565</a>          | <a href="#">193043</a>    | zinc finger protein 3              | <a href="#">Zfp3</a>               | 0.941 | -1.733 | 0.12544   | 0.354707 |
| 13433 | 10583310 | <a href="#">BC056964</a>           | <a href="#">75316</a>     | Josephin domain containing 3       | <a href="#">Josd3</a>              | 0.941 | -0.483 | 0.643748  | 0.838761 |
| 13434 | 10429440 | <a href="#">AK132992</a>           | <a href="#">268816</a>    | gene model 628, (NCBI)             | <a href="#">Gm628</a>              | 0.941 | -0.451 | 0.665206  | 0.850823 |
| 13435 | 10521984 | <a href="#">NM_019468</a>          | <a href="#">14380</a>     | glucose-6-phosphate dehydrogen     | <a href="#">G6pd2</a>              | 0.941 | -1.247 | 0.251476  | 0.525513 |
| 13436 | 10478754 | <a href="#">NM_001085495</a>       | <a href="#">99371</a>     | ADP-ribosylation factor guanin     | <a href="#">Arfgaf2</a>            | 0.941 | -0.7   | 0.505817  | 0.747682 |
| 13437 | 10439268 | <a href="#">NM_001013371</a>       | <a href="#">209200</a>    | deltex 3-like (Drosophila)         | <a href="#">Dtx3l</a>              | 0.941 | -1.602 | 0.151846  | 0.395645 |
| 13438 | 10372478 | <a href="#">NM_024454</a>          | <a href="#">216344</a>    | RAB21, member RAS oncogene<br>fam  | <a href="#">Rab21</a>              | 0.941 | -1.435 | 0.193159  | 0.452493 |
| 13439 | 10477808 | <a href="#">NM_025946</a>          | <a href="#">67067</a>     | RIKEN cDNA 2010100012<br>gene      | <a href="#">2010100012Rik</a>      | 0.941 | -1.771 | 0.118671  | 0.344006 |
| 13440 | 10367471 | <a href="#">NM_146861</a>          | <a href="#">18373</a>     | olfactory receptor 9               | <a href="#">Olf9</a>               | 0.941 | -0.445 | 0.669154  | 0.852809 |
| 13441 | 10568266 | <a href="#">BC066021</a>           | <a href="#">233899</a>    | gene model 166, (NCBI)             | <a href="#">Gm166</a>              | 0.941 | -0.823 | 0.436678  | 0.696302 |
| 13442 | 10533612 | <a href="#">NM_008277</a>          | <a href="#">15445</a>     | 4-hydroxyphenylpyruvic acid di     | <a href="#">Hpd</a>                | 0.94  | -0.065 | 0.949712  | 0.980608 |
| 13443 | 10515072 | <a href="#">NM_013876</a>          | <a href="#">29864</a>     | ring finger protein 11             | <a href="#">Rnf11</a>              | 0.94  | -1.888 | 0.0997229 | 0.308614 |
| 13444 | 10552656 | <a href="#">NM_016663</a>          | <a href="#">20981</a>     | synaptotagmin III                  | <a href="#">Syt3</a>               | 0.94  | -0.654 | 0.533198  | 0.767248 |
| 13445 | 10345423 | <a href="#">NM_145516</a>          | <a href="#">226971</a>    | pleckstrin homology domain con     | <a href="#">Plekhb2</a>            | 0.94  | -1.859 | 0.104067  | 0.317243 |
| 13446 | 10490150 | <a href="#">NM_021394</a>          | <a href="#">58203</a>     | Z-DNA binding protein 1            | <a href="#">Zbp1</a>               | 0.94  | -1.044 | 0.330351  | 0.606543 |
| 13447 | 10370991 | <a href="#">NM_028001</a>          | <a href="#">71912</a>     | junctional sarcoplasmic reticu     | <a href="#">Jsrp1</a>              | 0.94  | -1.674 | 0.136698  | 0.373246 |
| 13448 | 10356568 | <a href="#">NM_008998</a>          | <a href="#">19329</a>     | RAB17, member RAS oncogene<br>fam  | <a href="#">Rab17</a>              | 0.94  | -0.735 | 0.48567   | 0.733972 |
| 13449 | 10480937 | <a href="#">ENSMUST00000115988</a> | <a href="#">77481</a>     | RIKEN cDNA C030048H21<br>gene      | <a href="#">C030048H21Rik</a>      | 0.94  | -0.566 | 0.588563  | 0.805172 |
| 13450 | 10352829 | <a href="#">BC055955</a>           | <a href="#">319266</a>    | RIKEN cDNA A130010J15 gene         | <a href="#">A130010J15Rik</a>      | 0.94  | -1.284 | 0.238918  | 0.511718 |
| 13451 | 10529385 | <a href="#">NM_001015039</a>       | <a href="#">231125</a>    | zinc finger, FYVE domain conta     | <a href="#">Zfyve28</a>            | 0.94  | -0.747 | 0.478565  | 0.729081 |
| 13452 | 10409796 | <a href="#">ENSMUST00000055343</a> | <a href="#">74224</a>     | RIKEN cDNA 1700014D04<br>gene      | <a href="#">1700014D04Rik</a>      | 0.94  | -0.747 | 0.478656  | 0.729103 |
| 13453 | 10390705 | <a href="#">NM_178596</a>          | <a href="#">353155</a>    | gap junction protein, delta 3      | <a href="#">Gjd3</a>               | 0.94  | -0.887 | 0.403708  | 0.6686   |
| 13454 | 10360139 | <a href="#">NM_001033039</a>       | <a href="#">68874</a>     | kelch domain containing 9          | <a href="#">Klhdc9</a>             | 0.94  | -0.92  | 0.387132  | 0.656147 |
| 13455 | 10589907 | <a href="#">AK046107</a>           | <a href="#">12091</a>     | galactosidase, beta 1              | <a href="#">Glb1</a>               | 0.94  | -0.341 | 0.74258   | 0.890291 |
| 13456 | 10386178 | <a href="#">NM_146878</a>          | <a href="#">18329</a>     | olfactory receptor 30              | <a href="#">Olf30</a>              | 0.94  | -0.742 | 0.48133   | 0.730704 |
| 13457 | 10419170 | <a href="#">NM_172597</a>          | <a href="#">70561</a>     | thioredoxin domain containing      | <a href="#">Txndc16</a>            | 0.94  | -0.861 | 0.416815  | 0.679627 |
| 13458 | 10463687 | <a href="#">BC058949</a>           | <a href="#">226178</a>    | DNA segment, Chr 19, Wayne<br>Sta  | <a href="#">D19Wsu162e</a>         | 0.94  | -1.621 | 0.147794  | 0.389986 |
| 13459 | 10397788 | <a href="#">XM_909198</a>          | <a href="#">74947</a>     | RIKEN cDNA 4930463M05<br>gene      | <a href="#">4930463M05Rik</a>      | 0.94  | -0.833 | 0.431552  | 0.692107 |
| 13460 | 10351563 | <a href="#">NM_020579</a>          | <a href="#">57370</a>     | UDP-Gal:betaGlcNAc beta 1,4-<br>ga | <a href="#">B4galt3</a>            | 0.94  | -1.243 | 0.252677  | 0.526766 |
| 13461 | 10452118 | <a href="#">NM_028782</a>          | <a href="#">74142</a>     | Ion peptidase 1, mitochondrial     | <a href="#">Lonpl</a>              | 0.94  | -1.907 | 0.0969239 | 0.303204 |
| 13462 | 10570168 | <a href="#">BC049746</a>           | <a href="#">75528</a>     | RIKEN cDNA 1700018L24 gene         | <a href="#">1700018L24Rik</a>      | 0.94  | -0.761 | 0.470712  | 0.722574 |
| 13463 | 10555846 |                                    |                           |                                    |                                    | 0.94  | -0.775 | 0.4631    | 0.71752  |
| 13464 | 10422493 | <a href="#">NM_182806</a>          | <a href="#">110168</a>    | G protein-coupled receptor 18      | <a href="#">Gpr18</a>              | 0.94  | -1.008 | 0.345897  | 0.620063 |

|       |          |                                    |                           |                                     |                                    |       |        |           |          |
|-------|----------|------------------------------------|---------------------------|-------------------------------------|------------------------------------|-------|--------|-----------|----------|
| 13465 | 10401616 | <a href="#">NM_175337</a>          | <a href="#">217716</a>    | mutL homolog 3 (E coli)             | <a href="#">Mlh3</a>               | 0.94  | -0.472 | 0.651036  | 0.843733 |
| 13466 | 10554413 | <a href="#">NM_031375</a>          | <a href="#">83485</a>     | neugrin, neurite outgrowth ass      | <a href="#">Ngnr</a>               | 0.94  | -1.543 | 0.165378  | 0.415485 |
| 13467 | 10591610 | <a href="#">NM_177030</a>          | <a href="#">319899</a>    | dedicator of cytokinesis 6          | <a href="#">Dock6</a>              | 0.94  | -0.894 | 0.400369  | 0.666294 |
| 13468 | 10350535 | <a href="#">NM_133780</a>          | <a href="#">108989</a>    | translocated promoter region        | <a href="#">Tpr</a>                | 0.94  | -1.538 | 0.166748  | 0.417738 |
| 13469 | 10465336 | <a href="#">NM_026246</a>          | <a href="#">18120</a>     | mitochondrial ribosomal protei      | <a href="#">Mrpl49</a>             | 0.94  | -1.85  | 0.105567  | 0.320207 |
| 13470 | 10362886 | <a href="#">NM_199028</a>          | <a href="#">331623</a>    | cDNA sequence AK122525              | <a href="#">AK122525</a>           | 0.94  | -1.037 | 0.3332    | 0.609187 |
| 13471 | 10405432 | <a href="#">NM_016758</a>          | <a href="#">51791</a>     | regulator of G-protein signali      | <a href="#">Res14</a>              | 0.94  | -1.021 | 0.340354  | 0.61558  |
| 13472 | 10539933 | <a href="#">NM_153162</a>          | <a href="#">232223</a>    | thioredoxin reductase 3             | <a href="#">Txnrd3</a>             | 0.94  | -1.067 | 0.320278  | 0.597122 |
| 13473 | 10605507 | <a href="#">XM_621046</a>          | <a href="#">546337</a>    | predicted gene, EG546337            | <a href="#">EG546337</a>           | 0.94  | -1.971 | 0.0882016 | 0.286252 |
| 13474 | 10520483 | <a href="#">NM_027652</a>          | <a href="#">28042</a>     | DNA segment, Chr 5, Wayne Stat      | <a href="#">D5Wsu178e</a>          | 0.94  | -1.527 | 0.169311  | 0.420571 |
| 13475 | 10415811 | <a href="#">AK053602</a>           | <a href="#">319433</a>    | RIKEN cDNA E130113E03 gene          | <a href="#">E130113E03Rik</a>      | 0.94  | -0.871 | 0.411875  | 0.67572  |
| 13476 | 10443346 | <a href="#">BC016538</a>           | <a href="#">72775</a>     | Fanconi anemia, complementatio      | <a href="#">Fance</a>              | 0.94  | -1.128 | 0.295402  | 0.571766 |
| 13477 | 10363741 | <a href="#">ENSMUST00000099661</a> | <a href="#">100038508</a> | predicted gene, ENSMUSG0000007      | <a href="#">ENSMUSG00000074999</a> | 0.94  | -0.681 | 0.51716   | 0.756421 |
| 13478 | 10487823 | <a href="#">NM_011426</a>          | <a href="#">20612</a>     | sialic acid binding Ig-like le      | <a href="#">Siglec1</a>            | 0.94  | -1.088 | 0.311806  | 0.58828  |
| 13479 | 10576088 | <a href="#">ENSMUST00000055537</a> | <a href="#">195209</a>    | gene model 22, (NCBI)               | <a href="#">Gm22</a>               | 0.94  | -0.583 | 0.577356  | 0.797771 |
| 13480 | 10546227 | <a href="#">NM_020521</a>          | <a href="#">107798</a>    | vomeronal 1 receptor, B5            | <a href="#">V1rb5</a>              | 0.94  | -0.008 | 0.99402   | 0.997702 |
| 13481 | 10419390 | <a href="#">XR_033116</a>          | <a href="#">218997</a>    | similar to Ribosomal protein L      | <a href="#">LOC218997</a>          | 0.94  | -0.485 | 0.641894  | 0.837836 |
| 13482 | 10604834 |                                    |                           |                                     |                                    | 0.94  | -0.379 | 0.715533  | 0.875402 |
| 13483 | 10421143 | <a href="#">NM_010082</a>          | <a href="#">13522</a>     | a disintegrin and metallopropti     | <a href="#">Adam28</a>             | 0.94  | -0.724 | 0.492111  | 0.738324 |
| 13484 | 10416251 | <a href="#">NM_018781</a>          | <a href="#">13655</a>     | early growth response 3             | <a href="#">Egr3</a>               | 0.94  | -1.103 | 0.305448  | 0.581741 |
| 13485 | 10547015 | <a href="#">NM_026894</a>          | <a href="#">68971</a>     | RIKEN cDNA 1500001M20 gene          | <a href="#">1500001M20Rik</a>      | 0.94  | -1.741 | 0.124053  | 0.352504 |
| 13486 | 10377265 | <a href="#">NM_177320</a>          | <a href="#">320207</a>    | phosphoinositide-3-kinase, reg      | <a href="#">Pik3r5</a>             | 0.94  | -0.308 | 0.7666    | 0.902924 |
| 13487 | 10524089 | <a href="#">NM_207279</a>          | <a href="#">403178</a>    | phosphatidylinositol-specific       | <a href="#">Plcx1</a>              | 0.94  | -0.746 | 0.479263  | 0.729241 |
| 13488 | 10387222 | <a href="#">BC114997</a>           | <a href="#">237823</a>    | phosphoribosylformylglycinamid      | <a href="#">Pfas</a>               | 0.94  | -1.117 | 0.299762  | 0.575778 |
| 13489 | 10587550 |                                    |                           |                                     |                                    | 0.94  | -0.626 | 0.550662  | 0.780951 |
| 13490 | 10539143 | <a href="#">NM_026159</a>          | <a href="#">67442</a>     | retinol saturase (all trans re      | <a href="#">Retsat</a>             | 0.94  | -0.869 | 0.412814  | 0.676316 |
| 13491 | 10574226 | <a href="#">NM_011332</a>          | <a href="#">20295</a>     | chemokine (C-C motif) ligand 1      | <a href="#">Ccl17</a>              | 0.94  | -1.292 | 0.236283  | 0.508392 |
| 13492 | 10397763 | <a href="#">BC021385</a>           | <a href="#">217830</a>    | RIKEN cDNA 9030617O03               | <a href="#">9030617O03Rik</a>      | 0.94  | -0.577 | 0.581733  | 0.800427 |
| 13493 | 10552812 | <a href="#">NM_016849</a>          | <a href="#">54131</a>     | gene interferon regulatory factor 3 | <a href="#">Irf3</a>               | 0.94  | -1.85  | 0.1056    | 0.320213 |
| 13494 | 10529706 | <a href="#">XR_032717</a>          | <a href="#">195712</a>    | RIKEN cDNA 493042IP07 gene          | <a href="#">493042IP07Rik</a>      | 0.94  | -0.399 | 0.701168  | 0.869046 |
| 13495 | 10460177 | <a href="#">NM_001039657</a>       | <a href="#">17771</a>     | metallothionein-like 5, testis      | <a href="#">Mtl5</a>               | 0.94  | -0.86  | 0.41736   | 0.680204 |
| 13496 | 10520513 | <a href="#">BC019457</a>           | <a href="#">74919</a>     | RIKEN cDNA 4930471M23 gene          | <a href="#">4930471M23Rik</a>      | 0.94  | -1.726 | 0.126749  | 0.356666 |
| 13497 | 10500582 | <a href="#">NM_175552</a>          | <a href="#">269470</a>    | WD repeat domain 3                  | <a href="#">Wdr3</a>               | 0.94  | -1.117 | 0.299904  | 0.575946 |
| 13498 | 10408249 |                                    |                           |                                     |                                    | 0.94  | -0.078 | 0.939813  | 0.976619 |
| 13499 | 10445638 |                                    |                           |                                     |                                    | 0.94  | -0.279 | 0.788159  | 0.913843 |
| 13500 | 10416099 | <a href="#">NM_013461</a>          | <a href="#">11549</a>     | adrenergic receptor, alpha 1a       | <a href="#">Adra1a</a>             | 0.94  | -0.771 | 0.465111  | 0.71883  |
| 13501 | 10578399 |                                    |                           |                                     |                                    | 0.94  | -1.019 | 0.340973  | 0.615921 |
| 13502 | 10607002 | <a href="#">XR_032787</a>          | <a href="#">632685</a>    | similar to ribosomal protein S      | <a href="#">LOC632685</a>          | 0.94  | -1.137 | 0.291723  | 0.567783 |
| 13503 | 10525711 | <a href="#">NM_025671</a>          | <a href="#">66627</a>     | 2-oxoglutarate and iron-depend      | <a href="#">Ogfod2</a>             | 0.94  | -1.122 | 0.297898  | 0.573918 |
| 13504 | 10584883 | <a href="#">NM_022004</a>          | <a href="#">59095</a>     | FXYD domain-containing ion tra      | <a href="#">Fxyd6</a>              | 0.94  | -0.823 | 0.436806  | 0.696333 |
| 13505 | 10522604 | <a href="#">ENSMUST00000101096</a> | <a href="#">665055</a>    | predicted gene, EG665055            | <a href="#">EG665055</a>           | 0.94  | -1.666 | 0.138396  | 0.376395 |
| 13506 | 10371482 | <a href="#">NM_011631</a>          | <a href="#">22027</a>     | heat shock protein 90, beta (G      | <a href="#">Hsp90b1</a>            | 0.94  | -1.582 | 0.156472  | 0.402488 |
| 13507 | 10505747 | <a href="#">NM_178376</a>          | <a href="#">68441</a>     | Ras-related GTP binding A           | <a href="#">Rraga</a>              | 0.94  | -1.328 | 0.224658  | 0.494757 |
| 13508 | 10436951 | <a href="#">NM_138743</a>          | <a href="#">68936</a>     | RIKEN cDNA 1190017O12 gene          | <a href="#">1190017O12Rik</a>      | 0.94  | -0.919 | 0.387896  | 0.656721 |
| 13509 | 10384015 | <a href="#">NM_018870</a>          | <a href="#">56012</a>     | phosphoglycerate mutase 2           | <a href="#">Pgam2</a>              | 0.94  | -0.677 | 0.51966   | 0.757547 |
| 13510 | 10446074 | <a href="#">NM_010931</a>          | <a href="#">18140</a>     | ubiquitin-like, containing PHD      | <a href="#">Uhrf1</a>              | 0.939 | -0.774 | 0.463724  | 0.717865 |
| 13511 | 10542445 | <a href="#">NM_011499</a>          | <a href="#">20901</a>     | serine/threonine kinase recept      | <a href="#">Strap</a>              | 0.939 | -1.461 | 0.186156  | 0.444356 |
| 13512 | 10385818 | <a href="#">NM_025352</a>          | <a href="#">22272</a>     | ubiquinol-cytochrome c reducta      | <a href="#">Uqcrc</a>              | 0.939 | -1.448 | 0.189761  | 0.448303 |
| 13513 | 10520612 | <a href="#">NM_008439</a>          | <a href="#">16548</a>     | ketoheokinase                       | <a href="#">Khk</a>                | 0.939 | -1.154 | 0.285277  | 0.560533 |
| 13514 | 10389326 | <a href="#">NM_027388</a>          | <a href="#">70325</a>     | phosphatidylinositol glycan an      | <a href="#">Pigw</a>               | 0.939 | -0.827 | 0.434866  | 0.695306 |
| 13515 | 10520010 | <a href="#">NM_028431</a>          | <a href="#">73078</a>     | peptidase (mitochondrial proce      | <a href="#">Pmpcb</a>              | 0.939 | -1.431 | 0.194394  | 0.454475 |

|       |          |                                    |                           |                                 |                                    |       |        |          |          |
|-------|----------|------------------------------------|---------------------------|---------------------------------|------------------------------------|-------|--------|----------|----------|
| 13516 | 10447288 | <a href="#">NM_011381</a>          | <a href="#">20473</a>     | sine oculis-related homeobox 3  | <a href="#">Six3</a>               | 0.939 | -1.109 | 0.30302  | 0.579039 |
| 13517 | 10494757 |                                    |                           |                                 |                                    | 0.939 | -1.157 | 0.2843   | 0.559599 |
| 13518 | 10347796 | <a href="#">NM_029777</a>          | <a href="#">76867</a>     | rhomoid domain containing 1     | <a href="#">Rhbdd1</a>             | 0.939 | -1.027 | 0.337622 | 0.61318  |
| 13519 | 10410654 |                                    |                           |                                 |                                    | 0.939 | -0.514 | 0.6229   | 0.827402 |
| 13520 | 10464811 |                                    |                           |                                 |                                    | 0.939 | -1.023 | 0.339253 | 0.614614 |
| 13521 | 10372629 | <a href="#">NM_026570</a>          | <a href="#">64050</a>     | YEATS domain containing 4       | <a href="#">Yeats4</a>             | 0.939 | -1.573 | 0.158555 | 0.40535  |
| 13522 | 10527598 | <a href="#">NM_025624</a>          | <a href="#">66537</a>     | proteasome maturation protein   | <a href="#">Pomp</a>               | 0.939 | -1.711 | 0.12949  | 0.360872 |
| 13523 | 10594988 | <a href="#">NM_015806</a>          | <a href="#">50772</a>     | mitogen-activated protein kina  | <a href="#">Mapk6</a>              | 0.939 | -1.859 | 0.10406  | 0.317243 |
| 13524 | 10384838 | <a href="#">NM_146016</a>          | <a href="#">237711</a>    | RIKEN cDNA C230094A16 gene      | <a href="#">C230094A16Rik</a>      | 0.939 | -1.359 | 0.21524  | 0.482305 |
| 13525 | 10456096 | <a href="#">NM_146086</a>          | <a href="#">225600</a>    | phosphodiesterase 6A, cGMP-spe  | <a href="#">Pde6a</a>              | 0.939 | -0.461 | 0.65827  | 0.847092 |
| 13526 | 10551293 | <a href="#">NM_007817</a>          | <a href="#">13107</a>     | cytochrome P450, family 2, sub  | <a href="#">Cyp2f2</a>             | 0.939 | -0.909 | 0.392742 | 0.660631 |
| 13527 | 10483824 | <a href="#">NM_030188</a>          | <a href="#">78802</a>     | tétratricopeptide repeat domai  | <a href="#">Ttc30a1</a>            | 0.939 | -0.931 | 0.381822 | 0.651436 |
| 13528 | 10525165 | <a href="#">NM_145153</a>          | <a href="#">243262</a>    | 2'-5' oligoadenylate synthetas  | <a href="#">Oas1f</a>              | 0.939 | -0.878 | 0.408482 | 0.672914 |
| 13529 | 10424894 | <a href="#">AK170702</a>           | <a href="#">223658</a>    | RIKEN cDNA D330001F17 gene      | <a href="#">D330001F17Rik</a>      | 0.939 | -0.849 | 0.422942 | 0.685287 |
| 13530 | 10498597 | <a href="#">AK033123</a>           | <a href="#">100036536</a> | predicted gene, ENSMUSG0000005  | <a href="#">ENSMUSG00000054030</a> | 0.939 | -1.061 | 0.323043 | 0.59983  |
| 13531 | 10491474 | <a href="#">XR_032892</a>          | <a href="#">435727</a>    | similar to Ab1-115              | <a href="#">LOC435727</a>          | 0.939 | -0.393 | 0.705966 | 0.871814 |
| 13532 | 10427997 | <a href="#">NM_027496</a>          | <a href="#">67434</a>     | RIKEN cDNA 5730557B15 gene      | <a href="#">5730557B15Rik</a>      | 0.939 | -0.438 | 0.674164 | 0.855254 |
| 13533 | 10594969 | <a href="#">NM_001081153</a>       | <a href="#">208898</a>    | unc-13 homolog C (C. elegans)   | <a href="#">Unc13c</a>             | 0.939 | -0.586 | 0.576009 | 0.797128 |
| 13534 | 10508953 | <a href="#">NM_001039048</a>       | <a href="#">433766</a>    | tripartite motif-containing 63  | <a href="#">Trim63</a>             | 0.939 | -0.231 | 0.823885 | 0.929508 |
| 13535 | 10519224 | <a href="#">ENSMUST00000097737</a> | <a href="#">433813</a>    | pseudouridylylase synthase-like | <a href="#">Pusl1</a>              | 0.939 | -1.367 | 0.212706 | 0.478299 |
| 13536 | 10555407 | <a href="#">NM_183270</a>          | <a href="#">68185</a>     | coiled-coil-helix-coiled-coil-  | <a href="#">Chchd8</a>             | 0.939 | -1.172 | 0.278309 | 0.553321 |
| 13537 | 10393266 | <a href="#">NM_008240</a>          | <a href="#">15223</a>     | forkhead box J1                 | <a href="#">Foxj1</a>              | 0.939 | -1.026 | 0.338284 | 0.613858 |
| 13538 | 10576719 | <a href="#">NM_026951</a>          | <a href="#">69129</a>     | peroxisomal biogenesis factor   | <a href="#">Pex11c</a>             | 0.939 | -0.928 | 0.383256 | 0.65267  |
| 13539 | 10545608 | <a href="#">NM_011350</a>          | <a href="#">20355</a>     | sema domain, immunoglobulin do  | <a href="#">Sema4f</a>             | 0.939 | -0.664 | 0.527117 | 0.762858 |
| 13540 | 10503010 | <a href="#">NM_029330</a>          | <a href="#">75540</a>     | fucose-1-phosphate guanylyltra  | <a href="#">Fpgt</a>               | 0.939 | -1.172 | 0.278499 | 0.553444 |
| 13541 | 10500780 | <a href="#">NM_198658</a>          | <a href="#">381463</a>    | nuclear receptor subfamily 1,   | <a href="#">Nr1h5</a>              | 0.939 | -0.04  | 0.969155 | 0.987586 |
| 13542 | 10571467 | <a href="#">NM_026840</a>          | <a href="#">68797</a>     | platelet-derived growth factor  | <a href="#">Pdgfrl</a>             | 0.939 | -0.464 | 0.656281 | 0.846043 |
| 13543 | 10552343 |                                    |                           |                                 |                                    | 0.939 | -1.047 | 0.328727 | 0.605085 |
| 13544 | 10492049 | <a href="#">BC052702</a>           | <a href="#">56790</a>     | DNA segment, Chr 3, ERATO Doi   | <a href="#">D3Ertd300e</a>         | 0.939 | -1.426 | 0.195603 | 0.45594  |
| 13545 | 10345902 | <a href="#">ENSMUST00000039080</a> | <a href="#">71524</a>     | RIKEN cDNA 8430432A02 gene      | <a href="#">8430432A02Rik</a>      | 0.939 | -0.956 | 0.36994  | 0.640508 |
| 13546 | 10514902 | <a href="#">NM_029985</a>          | <a href="#">77809</a>     | leucine rich repeat containing  | <a href="#">Lrrc42</a>             | 0.939 | -1.856 | 0.104593 | 0.318248 |
| 13547 | 10417702 |                                    |                           |                                 |                                    | 0.939 | -0.787 | 0.4564   | 0.712554 |
| 13548 | 10438340 | <a href="#">NM_001111062</a>       | <a href="#">12846</a>     | catechol-O-methyltransferase    | <a href="#">Comt</a>               | 0.939 | -1.283 | 0.23922  | 0.512053 |
| 13549 | 10398299 | <a href="#">NM_001012310</a>       | <a href="#">104910</a>    | expressed sequence AI132487     | <a href="#">AI132487</a>           | 0.939 | -0.316 | 0.760729 | 0.900154 |
| 13550 | 10565057 | <a href="#">ENSMUST00000026816</a> | <a href="#">71968</a>     | WD repeat domain 73             | <a href="#">Wdr73</a>              | 0.939 | -0.944 | 0.375619 | 0.64575  |
| 13551 | 10398286 |                                    |                           |                                 |                                    | 0.939 | -0.465 | 0.655744 | 0.845986 |
| 13552 | 10507236 | <a href="#">ENSMUST00000049266</a> | <a href="#">76237</a>     | RIKEN cDNA 6430628N08 gene      | <a href="#">6430628N08Rik</a>      | 0.939 | -0.694 | 0.509187 | 0.750516 |
| 13553 | 10443836 | <a href="#">NM_028244</a>          | <a href="#">72462</a>     | ribosomal RNA processing 1 hom  | <a href="#">Rrp1b</a>              | 0.939 | -1.351 | 0.21753  | 0.485293 |
| 13554 | 10480445 | <a href="#">NM_029773</a>          | <a href="#">76857</a>     | speckle-type POZ protein-like   | <a href="#">Spopl</a>              | 0.939 | -0.886 | 0.404207 | 0.668849 |
| 13555 | 10453141 | <a href="#">NM_009231</a>          | <a href="#">20662</a>     | Son of sevenless homolog 1 (Dr  | <a href="#">Sos1</a>               | 0.939 | -1.314 | 0.229074 | 0.500108 |
| 13556 | 10510215 | <a href="#">BC024323</a>           | <a href="#">666532</a>    | predicted gene, OTTMUSG0000001  | <a href="#">OTTMUSG00000010657</a> | 0.939 | -1.166 | 0.280654 | 0.556047 |
| 13557 | 10559558 | <a href="#">NM_009406</a>          | <a href="#">21954</a>     | troponin I, cardiac             | <a href="#">Tnni3</a>              | 0.939 | -0.873 | 0.411022 | 0.675081 |
| 13558 | 10598956 | <a href="#">NM_009703</a>          | <a href="#">11836</a>     | v-raf murine sarcoma 3611 vira  | <a href="#">Araf</a>               | 0.939 | -1.225 | 0.259088 | 0.533309 |
| 13559 | 10397440 | <a href="#">NM_011934</a>          | <a href="#">26380</a>     | estrogen related receptor, bet  | <a href="#">Esrrb</a>              | 0.939 | -0.934 | 0.380464 | 0.650115 |
| 13560 | 10587085 | <a href="#">NM_001113283</a>       | <a href="#">235493</a>    | cDNA sequence BC031353          | <a href="#">BC031353</a>           | 0.939 | -1.802 | 0.113261 | 0.333396 |
| 13561 | 10565802 | <a href="#">NM_012052</a>          | <a href="#">27050</a>     | ribosomal protein S3            | <a href="#">Rps3</a>               | 0.939 | -1.334 | 0.2228   | 0.492667 |
| 13562 | 10364535 | <a href="#">NM_015779</a>          | <a href="#">50701</a>     | elastase 2, neutrophil          | <a href="#">Ela2</a>               | 0.939 | -0.672 | 0.52281  | 0.759485 |
| 13563 | 10357381 | <a href="#">XM_914055</a>          | <a href="#">22625</a>     | Yeast Sps1/Ste20-related kinas  | <a href="#">Ysk4</a>               | 0.939 | -0.902 | 0.396349 | 0.663741 |

|       |          |                                    |                           |                                 |                                    |       |        |          |          |
|-------|----------|------------------------------------|---------------------------|---------------------------------|------------------------------------|-------|--------|----------|----------|
| 13564 | 10350697 | <a href="#">NM_175460</a>          | <a href="#">226518</a>    | nicotinamide nucleotide adenyl  | <a href="#">Nmnat2</a>             | 0.939 | -0.716 | 0.496371 | 0.740946 |
| 13565 | 10367830 | <a href="#">NM_001114333</a>       | <a href="#">14816</a>     | glutamate receptor, metabotrop  | <a href="#">Grm1</a>               | 0.939 | -0.826 | 0.435257 | 0.695412 |
| 13566 | 10602020 | <a href="#">NM_001081499</a>       | <a href="#">245638</a>    | TBC1 domain family, member 8B   | <a href="#">Tbc1d8b</a>            | 0.939 | -1.205 | 0.266222 | 0.541183 |
| 13567 | 10549615 | <a href="#">NM_172736</a>          | <a href="#">232798</a>    | leukocyte receptor cluster (LR  | <a href="#">Leng8</a>              | 0.939 | -1.739 | 0.124296 | 0.353099 |
| 13568 | 10424070 | <a href="#">XR_033092</a>          | <a href="#">671518</a>    | similar to RNA-binding protein  | <a href="#">LOC671518</a>          | 0.939 | -0.507 | 0.627156 | 0.830395 |
| 13569 | 10471882 | <a href="#">NM_172854</a>          | <a href="#">241327</a>    | olfactomedin-like 2A            | <a href="#">Olfml2a</a>            | 0.939 | -1.233 | 0.256326 | 0.530714 |
| 13570 | 10582743 | <a href="#">NM_175561</a>          | <a href="#">270109</a>    | pecanex-like 2 (Drosophila)     | <a href="#">Pcnx12</a>             | 0.939 | -0.769 | 0.466447 | 0.719579 |
| 13571 | 10539342 | <a href="#">NM_133641</a>          | <a href="#">20166</a>     | rhotekin                        | <a href="#">Rtkn</a>               | 0.939 | -1.042 | 0.3311   | 0.607602 |
| 13572 | 10397230 | <a href="#">NM_028377</a>          | <a href="#">72873</a>     | RIKEN cDNA 2900006K08 gene      | <a href="#">2900006K08Rik</a>      | 0.939 | -1.079 | 0.315311 | 0.592249 |
| 13573 | 10605429 | <a href="#">XR_034103</a>          | <a href="#">667496</a>    | similar to high mobility group  | <a href="#">LOC667496</a>          | 0.939 | -1.556 | 0.162293 | 0.410862 |
| 13574 | 10569313 | <a href="#">BC049666</a>           | <a href="#">320802</a>    | RIKEN cDNA 6330512M04 gene      | <a href="#">6330512M04Rik</a>      | 0.939 | -0.92  | 0.387159 | 0.656147 |
| 13575 | 10540855 | <a href="#">NM_008285</a>          | <a href="#">15465</a>     | histamine receptor H1           | <a href="#">Hrh1</a>               | 0.939 | -0.917 | 0.388878 | 0.657381 |
| 13576 | 10375436 | <a href="#">NM_001013783</a>       | <a href="#">432552</a>    | predicted gene, OTTMUSG00000000 | <a href="#">OTTMUSG00000005491</a> | 0.939 | -0.685 | 0.514689 | 0.754767 |
| 13577 | 10596737 | <a href="#">NM_008140</a>          | <a href="#">14685</a>     | guanine nucleotide binding pro  | <a href="#">Gnat1</a>              | 0.939 | -0.802 | 0.448166 | 0.705796 |
| 13578 | 10576857 | <a href="#">NM_011592</a>          | <a href="#">21856</a>     | translocase of inner mitochond  | <a href="#">Timm44</a>             | 0.939 | -1.871 | 0.102348 | 0.313722 |
| 13579 | 10380862 | <a href="#">NM_144828</a>          | <a href="#">19049</a>     | protein phosphatase 1, regulat  | <a href="#">Ppp1r1b</a>            | 0.939 | -0.697 | 0.507879 | 0.749798 |
| 13580 | 10477389 | <a href="#">NM_199303</a>          | <a href="#">228796</a>    | bactericidal/permeability-incr  | <a href="#">Bpil3</a>              | 0.939 | -0.967 | 0.364726 | 0.635812 |
| 13581 | 10446581 | <a href="#">NM_009547</a>          | <a href="#">22666</a>     | zinc finger protein 161         | <a href="#">Zfp161</a>             | 0.939 | -0.899 | 0.397732 | 0.664302 |
| 13582 | 10568001 | <a href="#">NM_133670</a>          | <a href="#">20887</a>     | sulfotransferase family 1A, ph  | <a href="#">Sult1a1</a>            | 0.939 | -0.839 | 0.428339 | 0.689379 |
| 13583 | 10570011 |                                    |                           |                                 |                                    | 0.939 | -1.166 | 0.280556 | 0.555959 |
| 13584 | 10440543 | <a href="#">NM_001081068</a>       | <a href="#">78913</a>     | zinc finger protein 294         | <a href="#">Zfp294</a>             | 0.939 | -1.5   | 0.176031 | 0.429741 |
| 13585 | 10470109 | <a href="#">NM_013908</a>          | <a href="#">30839</a>     | F-box and WD-40 domain protein  | <a href="#">Fbxw5</a>              | 0.939 | -1.27  | 0.243395 | 0.51639  |
| 13586 | 10600566 |                                    |                           |                                 |                                    | 0.939 | -0.304 | 0.769961 | 0.904799 |
| 13587 | 10574155 |                                    |                           |                                 |                                    | 0.939 | -0.313 | 0.763024 | 0.901457 |
| 13588 | 10435501 | <a href="#">NM_001082543</a>       | <a href="#">20861</a>     | stefin A1                       | <a href="#">Stfa1</a>              | 0.939 | -0.223 | 0.829561 | 0.931357 |
| 13589 | 10534428 | <a href="#">NM_033571</a>          | <a href="#">94244</a>     | FK506 binding protein 6         | <a href="#">Fkbp6</a>              | 0.939 | -1.12  | 0.29857  | 0.574742 |
| 13590 | 10367708 | <a href="#">NM_008786</a>          | <a href="#">18537</a>     | protein-L-isoaspartate (D-aspa  | <a href="#">Pemt1</a>              | 0.938 | -1.517 | 0.171859 | 0.424012 |
| 13591 | 10441032 | <a href="#">NM_019500</a>          | <a href="#">56173</a>     | claudin 14                      | <a href="#">Cldn14</a>             | 0.938 | -0.677 | 0.51925  | 0.757488 |
| 13592 | 10507804 | <a href="#">NM_025873</a>          | <a href="#">66966</a>     | tRNA isopentenyltransferase 1   | <a href="#">Trit1</a>              | 0.938 | -1.421 | 0.197182 | 0.457903 |
| 13593 | 10530280 |                                    |                           |                                 |                                    | 0.938 | -1.515 | 0.172258 | 0.424438 |
| 13594 | 10446617 | <a href="#">XR_033984</a>          | <a href="#">240156</a>    | similar to ribosomal protein L  | <a href="#">LOC240156</a>          | 0.938 | -0.346 | 0.739363 | 0.889001 |
| 13595 | 10345016 | <a href="#">NM_001025305</a>       | <a href="#">21419</a>     | transcription factor AP-2 beta  | <a href="#">Tcfap2b</a>            | 0.938 | -0.685 | 0.515029 | 0.754817 |
| 13596 | 10427766 | <a href="#">NM_178717</a>          | <a href="#">239336</a>    | relaxin family peptide recepto  | <a href="#">Rxfp3</a>              | 0.938 | -0.471 | 0.651334 | 0.843859 |
| 13597 | 10393509 | <a href="#">ENSMUST00000106296</a> | <a href="#">72344</a>     | ubiquitin specific peptidase 3  | <a href="#">Usp36</a>              | 0.938 | -1.211 | 0.264072 | 0.539055 |
| 13598 | 10539653 | <a href="#">NM_176842</a>          | <a href="#">69786</a>     | Tp53rk binding protein          | <a href="#">Tprkb</a>              | 0.938 | -0.65  | 0.535823 | 0.769253 |
| 13599 | 10510509 | <a href="#">NM_177366</a>          | <a href="#">269604</a>    | G protein-coupled receptor 157  | <a href="#">Gpr157</a>             | 0.938 | -0.075 | 0.942357 | 0.977825 |
| 13600 | 10353305 | <a href="#">ENSMUST00000116144</a> | <a href="#">545306</a>    | predicted gene, EG545306        | <a href="#">EG545306</a>           | 0.938 | -1.107 | 0.303879 | 0.580207 |
| 13601 | 10502622 | <a href="#">NM_017474</a>          | <a href="#">23844</a>     | chloride channel calcium activ  | <a href="#">Clca3</a>              | 0.938 | -0.801 | 0.448667 | 0.706217 |
| 13602 | 10563350 | <a href="#">NM_018876</a>          | <a href="#">14344</a>     | fucosyltransferase 2            | <a href="#">Fut2</a>               | 0.938 | -1.362 | 0.214202 | 0.480692 |
| 13603 | 10449343 | <a href="#">NM_001013385</a>       | <a href="#">268934</a>    | glutamate receptor, metabotrop  | <a href="#">Grm4</a>               | 0.938 | -1.673 | 0.136888 | 0.373561 |
| 13604 | 10418842 | <a href="#">XM_484361</a>          | <a href="#">432836</a>    | RIKEN cDNA 3425401B19 gene      | <a href="#">3425401B19Rik</a>      | 0.938 | -0.667 | 0.52572  | 0.761828 |
| 13605 | 10540931 | <a href="#">ENSMUST00000068960</a> | <a href="#">352968</a>    | RIKEN cDNA D830050J10 gene      | <a href="#">D830050J10Rik</a>      | 0.938 | -0.999 | 0.350083 | 0.623549 |
| 13606 | 10563421 | <a href="#">NM_008172</a>          | <a href="#">14814</a>     | glutamate receptor, ionotropic  | <a href="#">Grin2d</a>             | 0.938 | -1.178 | 0.276051 | 0.550851 |
| 13607 | 10525989 | <a href="#">NM_001081342</a>       | <a href="#">243277</a>    | G protein-coupled receptor 133  | <a href="#">Gpr133</a>             | 0.938 | -0.445 | 0.669461 | 0.852871 |
| 13608 | 10552088 | <a href="#">ENSMUST00000098547</a> | <a href="#">100038516</a> | predicted gene, EG668322        | <a href="#">EG668322</a>           | 0.938 | -0.197 | 0.848935 | 0.93885  |
| 13609 | 10432243 | <a href="#">NM_024169</a>          | <a href="#">66120</a>     | FK506 binding protein 11        | <a href="#">Fkbp11</a>             | 0.938 | -1.498 | 0.176527 | 0.430507 |
| 13610 | 10440414 | <a href="#">NM_007990</a>          | <a href="#">14109</a>     | Finkel-Biskis-Reilly murine sa  | <a href="#">Fau</a>                | 0.938 | -1.459 | 0.186572 | 0.444895 |
| 13611 | 10554231 |                                    |                           |                                 |                                    | 0.938 | -0.398 | 0.702271 | 0.869368 |
| 13612 | 10444152 | <a href="#">NM_009926</a>          | <a href="#">12815</a>     | collagen, type XI, alpha 2      | <a href="#">Col11a2</a>            | 0.938 | -1.18  | 0.275437 | 0.550302 |
| 13613 | 10382653 | <a href="#">ENSMUST00000093911</a> | <a href="#">217328</a>    | myosin XVb                      | <a href="#">Myo15b</a>             | 0.938 | -0.803 | 0.447626 | 0.705227 |
| 13614 | 10522182 | <a href="#">NM_001081105</a>       | <a href="#">74734</a>     | ras homolog gene family, membe  | <a href="#">Rhhoh</a>              | 0.938 | -0.355 | 0.733092 | 0.88559  |
| 13615 | 10433104 | <a href="#">NM_013866</a>          | <a href="#">29813</a>     | zinc finger protein 385A        | <a href="#">Zfp385a</a>            | 0.938 | -1.454 | 0.187941 | 0.446224 |

|       |          |                                    |                           |                                 |                                     |       |        |           |          |
|-------|----------|------------------------------------|---------------------------|---------------------------------|-------------------------------------|-------|--------|-----------|----------|
| 13616 | 10495539 | <a href="#">NM_021388</a>          | <a href="#">58193</a>     | exostoses (multiple)-like 2     | <a href="#">Extl2</a>               | 0.938 | -1.958 | 0.0899252 | 0.289403 |
| 13617 | 10566209 | <a href="#">NM_146314</a>          | <a href="#">258311</a>    | olfactory receptor 601          | <a href="#">Olfir601</a>            | 0.938 | -0.267 | 0.796679  | 0.917464 |
| 13618 | 10475051 | <a href="#">NM_013720</a>          | <a href="#">29808</a>     | MAX gene associated             | <a href="#">Mga</a>                 | 0.938 | -1.586 | 0.155403  | 0.400908 |
| 13619 | 10501567 | <a href="#">NM_001038696</a>       | <a href="#">67225</a>     | RNA-binding region (RNP1, RRM)  | <a href="#">Rnpc3</a>               | 0.938 | -1.027 | 0.337649  | 0.61318  |
| 13620 | 10454229 | <a href="#">ENSMUST00000050671</a> | <a href="#">74644</a>     | RIKEN cDNA 4930426D05 gene      | <a href="#">4930426D05Rik</a>       | 0.938 | -1.189 | 0.271957  | 0.546343 |
| 13621 | 10532461 |                                    |                           |                                 |                                     | 0.938 | -0.41  | 0.693993  | 0.865705 |
| 13622 | 10472136 | <a href="#">NM_173030</a>          | <a href="#">271786</a>    | UDP-N-acetyl-alpha-D-galactosa  | <a href="#">Galnt13</a>             | 0.938 | -0.374 | 0.719184  | 0.877614 |
| 13623 | 10349809 | <a href="#">NM_172517</a>          | <a href="#">213464</a>    | retinoblastoma binding protein  | <a href="#">Rbbp5</a>               | 0.938 | -1.97  | 0.0883264 | 0.286438 |
| 13624 | 10408798 | <a href="#">NM_011547</a>          | <a href="#">21418</a>     | transcription factor AP-2, alp  | <a href="#">Tcfap2a</a>             | 0.938 | -0.947 | 0.374112  | 0.64426  |
| 13625 | 10548656 | <a href="#">BC069935</a>           | <a href="#">381818</a>    | predicted gene, EG381818        | <a href="#">EG381818</a>            | 0.938 | -0.784 | 0.457846  | 0.713313 |
| 13626 | 10371006 | <a href="#">NM_013895</a>          | <a href="#">30055</a>     | translocase of inner mitochond  | <a href="#">Timm13</a>              | 0.938 | -1.674 | 0.13687   | 0.373561 |
| 13627 | 10563170 | <a href="#">NM_015789</a>          | <a href="#">50722</a>     | dickkopf-like 1                 | <a href="#">Dkk1</a>                | 0.938 | -0.634 | 0.545765  | 0.777543 |
| 13628 | 10348004 | <a href="#">NM_027357</a>          | <a href="#">70247</a>     | proteasome (prosome, macropain) | <a href="#">Psmc1</a>               | 0.938 | -1.855 | 0.104803  | 0.318752 |
| 13629 | 10505198 | <a href="#">AK006094</a>           | <a href="#">72245</a>     | RIKEN cDNA 1700018M17 gene      | <a href="#">1700018M17Rik</a>       | 0.938 | -1.214 | 0.262959  | 0.537563 |
| 13630 | 10531972 | <a href="#">NM_029509</a>          | <a href="#">76074</a>     | RIKEN cDNA 5830443L24 gene      | <a href="#">5830443L24Rik</a>       | 0.938 | -0.209 | 0.839912  | 0.935328 |
| 13631 | 10498921 | <a href="#">NM_019911</a>          | <a href="#">56720</a>     | tryptophan 2,3-dioxygenase      | <a href="#">Tdo2</a>                | 0.938 | -0.598 | 0.568132  | 0.793223 |
| 13632 | 10464793 | <a href="#">ENSMUST00000096325</a> | <a href="#">381196</a>    | gene model 960, (NCBI)          | <a href="#">Gm960</a>               | 0.938 | -0.386 | 0.710474  | 0.873031 |
| 13633 | 10466624 | <a href="#">NM_011921</a>          | <a href="#">26358</a>     | aldehyde dehydrogenase family   | <a href="#">Aldh1a7</a>             | 0.938 | 0.084  | 0.935513  | 0.974509 |
| 13634 | 10540493 | <a href="#">NM_138677</a>          | <a href="#">192193</a>    | ER degradation enhancer, manno  | <a href="#">Edem1</a>               | 0.938 | -1.245 | 0.251905  | 0.525844 |
| 13635 | 10572271 | <a href="#">NM_181540</a>          | <a href="#">107770</a>    | transmembrane 6 superfamily me  | <a href="#">Tm6sf2</a>              | 0.938 | -0.9   | 0.397199  | 0.664239 |
| 13636 | 10572241 | <a href="#">NM_001024954</a>       | <a href="#">80720</a>     | pre-B-cell leukemia homeobox 4  | <a href="#">Pbx4</a>                | 0.938 | -1.13  | 0.294547  | 0.570921 |
| 13637 | 10598381 | <a href="#">NM_173747</a>          | <a href="#">209416</a>    | G patch domain and KOW motifs   | <a href="#">Gpkow</a>               | 0.938 | -1.248 | 0.250891  | 0.524763 |
| 13638 | 10364153 | <a href="#">ENSMUST00000009260</a> | <a href="#">100036541</a> | predicted gene, ENSMUSG00000000 | <a href="#">ENSMUSG00000009116</a>  | 0.938 | -1.587 | 0.155298  | 0.400794 |
| 13639 | 10530827 | <a href="#">NM_183284</a>          | <a href="#">69982</a>     | serine peptidase inhibitor, Ka  | <a href="#">Spink2</a>              | 0.938 | -0.732 | 0.487462  | 0.735095 |
| 13640 | 10514201 | <a href="#">ENSMUST00000070607</a> | <a href="#">230376</a>    | RIKEN cDNA 6230416J20 gene      | <a href="#">6230416J20Rik</a>       | 0.938 | -1.04  | 0.331814  | 0.608173 |
| 13641 | 10375935 | <a href="#">NM_011543</a>          | <a href="#">21402</a>     | S-phase kinase-associated prot  | <a href="#">Skp1a</a>               | 0.938 | -1.219 | 0.261332  | 0.535842 |
| 13642 | 10562667 |                                    |                           |                                 |                                     | 0.938 | -1.439 | 0.192136  | 0.451484 |
| 13643 | 10465043 | <a href="#">XM_886587</a>          | <a href="#">622178</a>    | predicted gene, EG622178        | <a href="#">EG622178</a>            | 0.938 | -1.684 | 0.134744  | 0.369956 |
| 13644 | 10520392 | <a href="#">NM_021470</a>          | <a href="#">56874</a>     | ring finger protein 32          | <a href="#">Rnf32</a>               | 0.938 | -0.808 | 0.445118  | 0.703541 |
| 13645 | 10437499 | <a href="#">NM_001079814</a>       | <a href="#">74022</a>     | RIKEN cDNA 3930401K13 gene      | <a href="#">3930401K13Rik</a>       | 0.938 | -1.243 | 0.252599  | 0.526721 |
| 13646 | 10575706 | <a href="#">NM_019573</a>          | <a href="#">80707</a>     | WW domain-containing oxidoredu  | <a href="#">Wwox</a>                | 0.938 | -1.19  | 0.271845  | 0.546343 |
| 13647 | 10369630 | <a href="#">NM_019553</a>          | <a href="#">56200</a>     | DEAD (Asp-Glu-Ala-Asp) box pol  | <a href="#">Ddx21</a>               | 0.938 | -1.636 | 0.144501  | 0.385726 |
| 13648 | 10534152 | <a href="#">NM_145218</a>          | <a href="#">212996</a>    | Williams-Beuren syndrome chrom  | <a href="#">Wbscr17</a>             | 0.938 | -1.003 | 0.34812   | 0.622132 |
| 13649 | 10480254 |                                    |                           |                                 |                                     | 0.938 | -0.847 | 0.424169  | 0.68641  |
| 13650 | 10550674 | <a href="#">NM_007949</a>          | <a href="#">13871</a>     | excision repair cross-compleme  | <a href="#">Ercc2</a>               | 0.938 | -1.252 | 0.24967   | 0.52381  |
| 13651 | 10579609 | <a href="#">NM_028715</a>          | <a href="#">74015</a>     | FCH domain only 1               | <a href="#">Fcho1</a>               | 0.938 | -0.544 | 0.602713  | 0.814246 |
| 13652 | 10384776 | <a href="#">ENSMUST00000101447</a> | <a href="#">70626</a>     | RIKEN cDNA 5730522E02 gene      | <a href="#">5730522E02Rik</a>       | 0.938 | -1.25  | 0.250236  | 0.524321 |
| 13653 | 10360120 | <a href="#">NM_025388</a>          | <a href="#">66155</a>     | ubiquitin-fold modifier conjug  | <a href="#">Ufc1</a>                | 0.938 | -1.318 | 0.227977  | 0.49895  |
| 13654 | 10482095 | <a href="#">NM_008500</a>          | <a href="#">16874</a>     | LIM homeobox protein 6          | <a href="#">Lhx6</a>                | 0.938 | -0.486 | 0.641212  | 0.837465 |
| 13655 | 10501315 | <a href="#">ENSMUST00000098691</a> | <a href="#">100038453</a> | predicted gene, OTTMUSG00000000 | <a href="#">OTTMUSG00000007300</a>  | 0.938 | -1.217 | 0.262004  | 0.536439 |
| 13656 | 10591997 | <a href="#">ENSMUST00000098918</a> | <a href="#">100038748</a> | predicted gene, ENSMUSG00000007 | <a href="#">ENSMUSG000000074462</a> | 0.938 | -0.465 | 0.655903  | 0.846006 |
| 13657 | 10459452 | <a href="#">ENSMUST00000068927</a> | <a href="#">381174</a>    | RIKEN cDNA A330084C13 gene      | <a href="#">A330084C13Rik</a>       | 0.938 | -0.605 | 0.563682  | 0.790247 |
| 13658 | 10485963 | <a href="#">NM_181416</a>          | <a href="#">228482</a>    | Rho GTPase activating protein   | <a href="#">Arhgap11a</a>           | 0.938 | -1.09  | 0.310921  | 0.587446 |
| 13659 | 10387855 | <a href="#">NM_009660</a>          | <a href="#">11687</a>     | arachidonate 15-lipoxygenase    | <a href="#">Alox15</a>              | 0.938 | -0.295 | 0.776293  | 0.908709 |
| 13660 | 10413985 | <a href="#">XM_985917</a>          | <a href="#">268729</a>    | gene model 626, (NCBI)          | <a href="#">Gm626</a>               | 0.938 | -0.284 | 0.784256  | 0.912068 |
| 13661 | 10429029 | <a href="#">NM_009623</a>          | <a href="#">11514</a>     | adenylate cyclase 8             | <a href="#">Adcy8</a>               | 0.938 | -1.904 | 0.0973657 | 0.303957 |
| 13662 | 10385824 | <a href="#">ENSMUST00000057722</a> | <a href="#">432561</a>    | predicted gene, ENSMUSG00000004 | <a href="#">ENSMUSG000000049427</a> | 0.938 | -0.486 | 0.641678  | 0.837715 |

|       |          |                                    |                           |                                |                               |       |        |           |          |
|-------|----------|------------------------------------|---------------------------|--------------------------------|-------------------------------|-------|--------|-----------|----------|
| 13663 | 10451481 | <a href="#">ENSMUST00000040624</a> | <a href="#">210982</a>    | cDNA sequence BC032203         | <a href="#">BC032203</a>      | 0.938 | -0.308 | 0.76667   | 0.902924 |
| 13664 | 10367337 | <a href="#">NM_026259</a>          | <a href="#">67588</a>     | ring finger protein 41         | <a href="#">Rnf41</a>         | 0.938 | -1.179 | 0.275746  | 0.550639 |
| 13665 | 10592850 | <a href="#">NM_021789</a>          | <a href="#">60409</a>     | trafficking protein particle c | <a href="#">Trappc4</a>       | 0.938 | -1.935 | 0.0929707 | 0.295472 |
| 13666 | 10482323 | <a href="#">NM_024209</a>          | <a href="#">67857</a>     | protein phosphatase 6, catalyt | <a href="#">Ppp6c</a>         | 0.938 | -1.485 | 0.179795  | 0.43509  |
| 13667 | 10550067 | <a href="#">NM_175558</a>          | <a href="#">269870</a>    | zinc finger protein 446        | <a href="#">Zfp446</a>        | 0.938 | -0.665 | 0.526592  | 0.762621 |
| 13668 | 10394437 | <a href="#">NM_021429</a>          | <a href="#">58240</a>     | HCLS1 binding protein 3        | <a href="#">Hs1bp3</a>        | 0.938 | -0.535 | 0.6088    | 0.817918 |
| 13669 | 10457895 | <a href="#">NM_133195</a>          | <a href="#">108013</a>    | bruno-like 4, RNA binding prot | <a href="#">Brunol4</a>       | 0.938 | -1.581 | 0.156687  | 0.402992 |
| 13670 | 10522396 | <a href="#">NM_023429</a>          | <a href="#">68095</a>     | OCIA domain containing 1       | <a href="#">Ociad1</a>        | 0.938 | -1.26  | 0.246976  | 0.520282 |
| 13671 | 10590325 | <a href="#">NM_007614</a>          | <a href="#">12387</a>     | catenin (cadherin associated p | <a href="#">Ctnnb1</a>        | 0.938 | -1.526 | 0.169678  | 0.420989 |
| 13672 | 10550237 | <a href="#">NM_025898</a>          | <a href="#">108124</a>    | N-ethylmaleimide sensitive fus | <a href="#">Napa</a>          | 0.938 | -1.135 | 0.292749  | 0.568767 |
| 13673 | 10409779 | <a href="#">NM_183290</a>          | <a href="#">70900</a>     | RIKEN cDNA 4921517D22 gene     | <a href="#">4921517D22Rik</a> | 0.937 | -0.579 | 0.580245  | 0.799472 |
| 13674 | 10532989 | <a href="#">NM_029645</a>          | <a href="#">384281</a>    | glutamyl-tRNA(Gln) amidotransf | <a href="#">Gatc</a>          | 0.937 | -1.478 | 0.181822  | 0.438179 |
| 13675 | 10408146 | <a href="#">NM_134218</a>          | <a href="#">171252</a>    | vomer nasal 1 receptor, H9     | <a href="#">V1rh9</a>         | 0.937 | -0.404 | 0.698226  | 0.867766 |
| 13676 | 10503963 |                                    |                           |                                |                               | 0.937 | -0.772 | 0.464708  | 0.71847  |
| 13677 | 10483756 | <a href="#">NM_175015</a>          | <a href="#">228033</a>    | ATP synthase, H+ transporting, | <a href="#">Atp5g3</a>        | 0.937 | -1.809 | 0.112167  | 0.331562 |
| 13678 | 10590407 | <a href="#">BC030045</a>           | <a href="#">270210</a>    | zinc finger protein 651        | <a href="#">Zfp651</a>        | 0.937 | -0.938 | 0.378632  | 0.648305 |
| 13679 | 10401684 | <a href="#">NM_144524</a>          | <a href="#">68737</a>     | angel homolog 1 (Drosophila)   | <a href="#">Angell</a>        | 0.937 | -0.938 | 0.378438  | 0.648225 |
| 13680 | 10565705 | <a href="#">NM_011010</a>          | <a href="#">18378</a>     | olfactory marker protein       | <a href="#">Omp</a>           | 0.937 | -0.528 | 0.613401  | 0.820926 |
| 13681 | 10395463 | <a href="#">ENSMUST00000038121</a> | <a href="#">629820</a>    | predicted gene, EG629820       | <a href="#">EG629820</a>      | 0.937 | -1.637 | 0.144481  | 0.385726 |
| 13682 | 10349644 | <a href="#">NM_011924</a>          | <a href="#">26361</a>     | arginine vasopressin receptor  | <a href="#">Avpr1b</a>        | 0.937 | -0.572 | 0.584937  | 0.802565 |
| 13683 | 10595900 | <a href="#">NM_025485</a>          | <a href="#">64655</a>     | mitochondrial ribosomal protei | <a href="#">Mrps22</a>        | 0.937 | -1.506 | 0.174626  | 0.427694 |
| 13684 | 10392953 | <a href="#">NM_173048</a>          | <a href="#">260302</a>    | golgi associated, gamma adapti | <a href="#">Gga3</a>          | 0.937 | -1.471 | 0.183424  | 0.440568 |
| 13685 | 10478847 | <a href="#">NM_001081005</a>       | <a href="#">68949</a>     | RIKEN cDNA 1500012F01 gene     | <a href="#">1500012F01Rik</a> | 0.937 | -1.188 | 0.272358  | 0.54694  |
| 13686 | 10408789 | <a href="#">AF548110</a>           | <a href="#">218165</a>    | orofacial cleft 1 candidate 1  | <a href="#">Ofcc1</a>         | 0.937 | -0.965 | 0.365929  | 0.636964 |
| 13687 | 10446069 |                                    |                           |                                |                               | 0.937 | -0.371 | 0.721472  | 0.878683 |
| 13688 | 10362745 | <a href="#">XR_032514</a>          | <a href="#">633979</a>    | similar to hCG2030702          | <a href="#">LOC633979</a>     | 0.937 | -0.578 | 0.580558  | 0.799564 |
| 13689 | 10376685 | <a href="#">NM_172943</a>          | <a href="#">268420</a>    | alkB, alkylation repair homolo | <a href="#">Alkbh5</a>        | 0.937 | -1.006 | 0.347172  | 0.621453 |
| 13690 | 10514133 | <a href="#">NM_027238</a>          | <a href="#">69863</a>     | RIKEN cDNA 1810054D07 gene     | <a href="#">1810054D07Rik</a> | 0.937 | -0.716 | 0.496707  | 0.741117 |
| 13691 | 10419561 | <a href="#">NM_207558</a>          | <a href="#">404319</a>    | olfactory receptor 750         | <a href="#">Olf750</a>        | 0.937 | -0.733 | 0.486629  | 0.734425 |
| 13692 | 10596675 | <a href="#">NM_001081244</a>       | <a href="#">434436</a>    | cDNA sequence BY080835         | <a href="#">BY080835</a>      | 0.937 | -0.644 | 0.539349  | 0.772158 |
| 13693 | 10465638 | <a href="#">BC020020</a>           | <a href="#">70999</a>     | N-acetyltransferase-L1         | <a href="#">Nat1L</a>         | 0.937 | -1.463 | 0.381794  | 0.556928 |
| 13694 | 10397962 | <a href="#">XM_019025</a>          | <a href="#">544888</a>    | predicted gene, EG544888       | <a href="#">EG544888</a>      | 0.937 | -0.966 | 0.365271  | 0.636343 |
| 13695 | 10426208 | <a href="#">NM_182928</a>          | <a href="#">223780</a>    | adrenomedullin 2               | <a href="#">Adm2</a>          | 0.937 | -1.135 | 0.292677  | 0.568731 |
| 13696 | 10365812 | <a href="#">AK016739</a>           | <a href="#">74454</a>     | RIKEN cDNA 4933408J17 gene     | <a href="#">4933408J17Rik</a> | 0.937 | -1.056 | 0.325191  | 0.601561 |
| 13697 | 10491261 | <a href="#">NM_027016</a>          | <a href="#">69276</a>     | SEC62 homolog (S. cerevisiae)  | <a href="#">Sec62</a>         | 0.937 | -1.387 | 0.206684  | 0.471173 |
| 13698 | 10397158 | <a href="#">NM_134246</a>          | <a href="#">171281</a>    | acyl-CoA thioesterase 3        | <a href="#">Acot3</a>         | 0.937 | -1.758 | 0.120818  | 0.347267 |
| 13699 | 10598499 | <a href="#">XM_905995</a>          | <a href="#">632013</a>    | predicted gene, EG632013       | <a href="#">EG632013</a>      | 0.937 | -1.449 | 0.189481  | 0.448035 |
| 13700 | 10428150 | <a href="#">NM_001081253</a>       | <a href="#">78803</a>     | F-box protein 43               | <a href="#">Fbxo43</a>        | 0.937 | -0.562 | 0.591276  | 0.806576 |
| 13701 | 10587655 | <a href="#">ENSMUST00000034998</a> | <a href="#">71640</a>     | RIKEN cDNA 4930422I07 gene     | <a href="#">4930422I07Rik</a> | 0.937 | -1.313 | 0.229439  | 0.500438 |
| 13702 | 10440118 |                                    |                           |                                |                               | 0.937 | -0.792 | 0.453407  | 0.709874 |
| 13703 | 10432298 | <a href="#">ENSMUST00000023741</a> | <a href="#">381022</a>    | myeloid/lymphoid or mixed-line | <a href="#">Mll2</a>          | 0.937 | -1.58  | 0.156931  | 0.403374 |
| 13704 | 10589654 | <a href="#">NM_146228</a>          | <a href="#">235633</a>    | ALS2 C-terminal like           | <a href="#">Als2cl</a>        | 0.937 | -0.875 | 0.409677  | 0.674122 |
| 13705 | 10426242 | <a href="#">AK083297</a>           | <a href="#">319362</a>    | RIKEN cDNA C730034F03 gene     | <a href="#">C730034F03Rik</a> | 0.937 | -0.914 | 0.390455  | 0.659    |
| 13706 | 10387903 | <a href="#">NM_001013607</a>       | <a href="#">327956</a>    | vitelline membrane outer layer | <a href="#">Vmol</a>          | 0.937 | -0.86  | 0.417666  | 0.680417 |
| 13707 | 10515213 | <a href="#">NM_130865</a>          | <a href="#">140477</a>    | diencephalon/mesencephalon hom | <a href="#">Dmbx1</a>         | 0.937 | -0.752 | 0.476004  | 0.727266 |
| 13708 | 10355141 | <a href="#">NM_033563</a>          | <a href="#">93691</a>     | Kruppel-like factor 7 (ubiquit | <a href="#">Klf7</a>          | 0.937 | -1.403 | 0.202187  | 0.464958 |
| 13709 | 10399383 | <a href="#">NM_173417</a>          | <a href="#">238076</a>    | potassium voltage-gated channe | <a href="#">Kcns3</a>         | 0.937 | -0.562 | 0.591242  | 0.806576 |
| 13710 | 10524396 | <a href="#">NM_001012726</a>       | <a href="#">503692</a>    | activator of yeast meiotic pro | <a href="#">Aym1</a>          | 0.937 | -0.648 | 0.537248  | 0.770298 |
| 13711 | 10593258 | <a href="#">XM_001478811</a>       | <a href="#">100042785</a> | similar to hCG1646420          | <a href="#">LOC100042785</a>  | 0.937 | -1.205 | 0.266326  | 0.541183 |
| 13712 | 10387907 | <a href="#">BC047268</a>           | <a href="#">18806</a>     | phospholipase D2               | <a href="#">Pld2</a>          | 0.937 | -0.717 | 0.495792  | 0.740536 |
| 13713 | 10441017 | <a href="#">NM_145482</a>          | <a href="#">224440</a>    | SET domain containing 4        | <a href="#">Setd4</a>         | 0.937 | -1.718 | 0.128233  | 0.35912  |
| 13714 | 10438112 | <a href="#">NM_001001983</a>       | <a href="#">224020</a>    | phosphatidylinositol 4-kinase, | <a href="#">Pi4ka</a>         | 0.937 | -1.568 | 0.159711  | 0.407016 |



|       |          |                                    |                           |                                |                                    |       |        |          |          |
|-------|----------|------------------------------------|---------------------------|--------------------------------|------------------------------------|-------|--------|----------|----------|
| 13769 | 10443367 | <a href="#">ENSMUST00000095448</a> | <a href="#">520187</a>    | gene                           | <a href="#">E230001N04Rik</a>      | 0.936 | -0.702 | 0.504802 | 0.747036 |
| 13770 | 10553895 |                                    |                           |                                |                                    | 0.936 | -0.39  | 0.707622 | 0.872268 |
| 13771 | 10538526 | <a href="#">BC117878</a>           | <a href="#">78937</a>     | RIKEN cDNA 5830411G16 gene     | <a href="#">5830411G16Rik</a>      | 0.936 | -1.383 | 0.207945 | 0.472478 |
| 13772 | 10381770 | <a href="#">NM_199019</a>          | <a href="#">237958</a>    | RIKEN cDNA 4933407P14 gene     | <a href="#">4933407P14Rik</a>      | 0.936 | -0.888 | 0.403161 | 0.668374 |
| 13773 | 10588132 | <a href="#">NM_001077424</a>       | <a href="#">333424</a>    | alpha-1,4-N-acetylglucosaminyl | <a href="#">A4gnt</a>              | 0.936 | -0.588 | 0.574308 | 0.797076 |
| 13774 | 10504329 | <a href="#">BC027414</a>           | <a href="#">622404</a>    | hypothetical protein LOC622404 | <a href="#">RP23-195K8.6</a>       | 0.936 | -0.668 | 0.525034 | 0.761313 |
| 13775 | 10556487 | <a href="#">NM_177248</a>          | <a href="#">320743</a>    | RIKEN cDNA A630005I04 gene     | <a href="#">A630005I04Rik</a>      | 0.936 | -0.571 | 0.585614 | 0.80308  |
| 13776 | 10554166 | <a href="#">ENSMUST00000065516</a> | <a href="#">75547</a>     | A kinase (PRKA) anchor protein | <a href="#">Akap13</a>             | 0.936 | -1.416 | 0.198365 | 0.459238 |
| 13777 | 10402630 | <a href="#">NM_011973</a>          | <a href="#">26448</a>     | renal tumor antigen            | <a href="#">Rage</a>               | 0.936 | -1.445 | 0.190354 | 0.44932  |
| 13778 | 10502982 | <a href="#">NM_177066</a>          | <a href="#">435766</a>    | TNNI3 interacting kinase       | <a href="#">Tnni3k</a>             | 0.936 | -1.088 | 0.311572 | 0.588151 |
| 13779 | 10363392 | <a href="#">NM_019965</a>          | <a href="#">56709</a>     | DnaJ (Hsp40) homolog, subfamil | <a href="#">Dnajb12</a>            | 0.936 | -1.425 | 0.196022 | 0.456422 |
| 13780 | 10366909 | <a href="#">NM_027900</a>          | <a href="#">71750</a>     | R3H domain containing 2        | <a href="#">R3hdm2</a>             | 0.936 | -1.428 | 0.195187 | 0.455424 |
| 13781 | 10398340 |                                    |                           |                                |                                    | 0.936 | -0.767 | 0.467544 | 0.720274 |
| 13782 | 10513692 | <a href="#">NM_001008791</a>       | <a href="#">73750</a>     | whirlin                        | <a href="#">Whrn</a>               | 0.936 | -1.229 | 0.257751 | 0.531852 |
| 13783 | 10475648 | <a href="#">NM_026981</a>          | <a href="#">69185</a>     | DTW domain containing 1        | <a href="#">Dtwd1</a>              | 0.936 | -0.482 | 0.644172 | 0.839078 |
| 13784 | 10551069 | <a href="#">NM_175436</a>          | <a href="#">210172</a>    | zinc finger protein 526        | <a href="#">Zfp526</a>             | 0.936 | -1.101 | 0.306253 | 0.582793 |
| 13785 | 10591691 | <a href="#">BC057069</a>           | <a href="#">77609</a>     | RIKEN cDNA C330001K17 gene     | <a href="#">C330001K17Rik</a>      | 0.936 | -1.87  | 0.102408 | 0.313858 |
| 13786 | 10593177 | <a href="#">ENSMUST00000070831</a> | <a href="#">74361</a>     | RIKEN cDNA 4931429L15 gene     | <a href="#">4931429L15Rik</a>      | 0.936 | -0.567 | 0.587885 | 0.804702 |
| 13787 | 10552760 | <a href="#">NM_021549</a>          | <a href="#">59047</a>     | polynucleotide kinase 3'- phos | <a href="#">Pnkp</a>               | 0.936 | -1.093 | 0.309349 | 0.586099 |
| 13788 | 10432556 | <a href="#">XM_001476618</a>       | <a href="#">100046686</a> | similar to ubiquinol-cytochrom | <a href="#">LOC100046686</a>       | 0.936 | -0.484 | 0.642885 | 0.838239 |
| 13789 | 10541094 | <a href="#">NM_177684</a>          | <a href="#">232337</a>    | zinc finger protein 637        | <a href="#">Zfp637</a>             | 0.936 | -1.538 | 0.166704 | 0.417678 |
| 13790 | 10393436 | <a href="#">NM_027919</a>          | <a href="#">71776</a>     | threonine aldolase 1           | <a href="#">Tha1</a>               | 0.936 | -0.846 | 0.424787 | 0.686726 |
| 13791 | 10510604 | <a href="#">NM_172704</a>          | <a href="#">230935</a>    | DnaJ (Hsp40) homolog, subfamil | <a href="#">Dnajc11</a>            | 0.936 | -1.516 | 0.171966 | 0.424079 |
| 13792 | 10590462 |                                    |                           |                                |                                    | 0.936 | -0.461 | 0.658603 | 0.847411 |
| 13793 | 10521356 | <a href="#">NM_019447</a>          | <a href="#">54426</a>     | hepatocyte growth factor activ | <a href="#">Hgfac</a>              | 0.936 | -1.129 | 0.294948 | 0.571244 |
| 13794 | 10551159 | <a href="#">XR_034166</a>          | <a href="#">100047962</a> | similar to ribosomal protein L | <a href="#">LOC100047962</a>       | 0.936 | -0.393 | 0.705507 | 0.871589 |
| 13795 | 10397752 | <a href="#">NM_009790</a>          | <a href="#">12313</a>     | calmodulin 1                   | <a href="#">Calm1</a>              | 0.936 | -1.853 | 0.105086 | 0.319364 |
| 13796 | 10512709 | <a href="#">NM_001009949</a>       | <a href="#">230125</a>    | mitochondrial carrier triple r | <a href="#">Mcart1</a>             | 0.936 | -1.396 | 0.204063 | 0.467365 |
| 13797 | 10520948 | <a href="#">NM_001081407</a>       | <a href="#">665270</a>    | phospholipase B1               | <a href="#">Plb1</a>               | 0.936 | -0.713 | 0.498488 | 0.742429 |
| 13798 | 10444991 | <a href="#">NM_001034909</a>       | <a href="#">547347</a>    | predicted gene, EG547347       | <a href="#">EG547347</a>           | 0.936 | -0.719 | 0.494514 | 0.7396   |
| 13799 | 10444978 | <a href="#">NM_008136</a>          | <a href="#">14670</a>     | guanine nucleotide binding pro | <a href="#">Gna-rs1</a>            | 0.936 | -0.852 | 0.421419 | 0.683844 |
| 13800 | 10548057 | <a href="#">NM_025358</a>          | <a href="#">66108</a>     | NADH dehydrogenase (ubiquinone | <a href="#">Ndufa9</a>             | 0.936 | -1.229 | 0.257529 | 0.531656 |
| 13801 | 10396645 | <a href="#">NM_178744</a>          | <a href="#">268564</a>    | zinc finger and BTB domain con | <a href="#">Zbtb1</a>              | 0.936 | -0.703 | 0.504157 | 0.74644  |
| 13802 | 10444352 | <a href="#">NM_010929</a>          | <a href="#">18132</a>     | Notch gene homolog 4 (Drosophi | <a href="#">Notch4</a>             | 0.936 | -1.011 | 0.344651 | 0.61884  |
| 13803 | 10582188 | <a href="#">ENSMUST00000054057</a> | <a href="#">74227</a>     | RIKEN cDNA 1700016A09 gene     | <a href="#">1700016A09Rik</a>      | 0.936 | -1.092 | 0.310158 | 0.586843 |
| 13804 | 10557432 | <a href="#">AK144875</a>           | <a href="#">100038390</a> | predicted gene, ENSMUSG0000007 | <a href="#">ENSMUSG00000073831</a> | 0.936 | -1.652 | 0.141342 | 0.38056  |
| 13805 | 10592802 | <a href="#">NM_027909</a>          | <a href="#">71764</a>     | C2 calcium-dependent domain co | <a href="#">C2cd2l</a>             | 0.936 | -0.425 | 0.683213 | 0.859827 |
| 13806 | 10383032 | <a href="#">NM_172573</a>          | <a href="#">217364</a>    | RIKEN cDNA D230014K01 gene     | <a href="#">D230014K01Rik</a>      | 0.936 | -0.867 | 0.413608 | 0.677093 |
| 13807 | 10421021 | <a href="#">NM_001037931</a>       | <a href="#">628416</a>    | predicted gene, EG628416       | <a href="#">EG628416</a>           | 0.936 | -1.062 | 0.322435 | 0.599241 |
| 13808 | 10488430 | <a href="#">ENSMUST00000099266</a> | <a href="#">100038377</a> | predicted gene, ENSMUSG0000007 | <a href="#">ENSMUSG00000074739</a> | 0.936 | -0.756 | 0.473446 | 0.725045 |
| 13809 | 10451559 | <a href="#">BC028263</a>           | <a href="#">75462</a>     | RIKEN cDNA 1700001C19 gene     | <a href="#">1700001C19Rik</a>      | 0.936 | -0.416 | 0.689455 | 0.863666 |
| 13810 | 10531970 | <a href="#">XM_909311</a>          | <a href="#">545790</a>    | predicted gene, EG545790       | <a href="#">EG545790</a>           | 0.936 | -1.207 | 0.265464 | 0.540577 |
| 13811 | 10394288 | <a href="#">NM_011365</a>          | <a href="#">20403</a>     | intersectin 2                  | <a href="#">Itsn2</a>              | 0.936 | -1.374 | 0.210518 | 0.475962 |
| 13812 | 10376406 | <a href="#">NM_146500</a>          | <a href="#">258493</a>    | olfactory receptor 319         | <a href="#">Olfr319</a>            | 0.936 | -0.063 | 0.951708 | 0.981222 |
| 13813 | 10560298 |                                    |                           |                                |                                    | 0.936 | -0.914 | 0.390063 | 0.658746 |
| 13814 | 10588121 | <a href="#">NM_031403</a>          | <a href="#">83703</a>     | debranching enzyme homolog 1 ( | <a href="#">Dbr1</a>               | 0.936 | -0.968 | 0.364199 | 0.635557 |
| 13815 | 10553842 | <a href="#">NM_130880</a>          | <a href="#">170711</a>    | OTU domain containing 7A       | <a href="#">Otud7a</a>             | 0.936 | -1.415 | 0.198651 | 0.459751 |
| 13816 | 10532534 | <a href="#">NM_001039228</a>       | <a href="#">625424</a>    | predicted gene, EG625424       | <a href="#">EG625424</a>           | 0.936 | -0.671 | 0.523023 | 0.759642 |
| 13817 | 10420500 | <a href="#">NM_020510</a>          | <a href="#">57277</a>     | predicted LOC/Blau domain cont | <a href="#">Shuap1</a>             | 0.936 | -0.747 | 0.478077 | 0.720122 |

|       |          |                                    |                           |                                 |                                    |       |        |           |          |
|-------|----------|------------------------------------|---------------------------|---------------------------------|------------------------------------|-------|--------|-----------|----------|
| 13817 | 10429500 | <a href="#">NM_020512</a>          | <a href="#">37277</a>     | secreted Lyo/1 hair domain cont | <a href="#">Sulrp1</a>             | 0.930 | -0.747 | 0.478977  | 0.727132 |
| 13818 | 10506154 | <a href="#">NM_001081264</a>       | <a href="#">320438</a>    | asparagine-linked glycosylatio  | <a href="#">Alg6</a>               | 0.936 | -0.941 | 0.377279  | 0.647289 |
| 13819 | 10351533 | <a href="#">NM_009803</a>          | <a href="#">12355</a>     | nuclear receptor subfamily 1,   | <a href="#">Nr1i3</a>              | 0.936 | -0.536 | 0.608002  | 0.817473 |
| 13820 | 10406953 | <a href="#">NM_030731</a>          | <a href="#">81003</a>     | tripartite motif-containing 23  | <a href="#">Trim23</a>             | 0.936 | -1.531 | 0.168377  | 0.419736 |
| 13821 | 10466604 |                                    |                           |                                 |                                    | 0.936 | -0.576 | 0.582051  | 0.800654 |
| 13822 | 10459730 | <a href="#">NM_145494</a>          | <a href="#">107029</a>    | malic enzyme 2, NAD(+)-depende  | <a href="#">Me2</a>                | 0.936 | -1.932 | 0.0933732 | 0.296261 |
| 13823 | 10382830 | <a href="#">DQ390337</a>           | <a href="#">100038570</a> | predicted gene, OTTMUSG0000000  | <a href="#">OTTMUSG00000003947</a> | 0.936 | -0.684 | 0.515118  | 0.754817 |
| 13824 | 10367292 | <a href="#">NM_026444</a>          | <a href="#">12974</a>     | citrate synthase                | <a href="#">Cs</a>                 | 0.936 | -2.218 | 0.0609244 | 0.227796 |
| 13825 | 10573077 | <a href="#">ENSMUST00000042585</a> | <a href="#">70793</a>     | predicted gene, EG70793         | <a href="#">EG70793</a>            | 0.936 | -0.912 | 0.391104  | 0.65945  |
| 13826 | 10602590 |                                    |                           |                                 |                                    | 0.936 | -1.642 | 0.14331   | 0.384029 |
| 13827 | 10423098 | <a href="#">NM_053077</a>          | <a href="#">22293</a>     | solute carrier family 45, memb  | <a href="#">Slc45a2</a>            | 0.936 | -0.504 | 0.629466  | 0.831325 |
| 13828 | 10526781 | <a href="#">BC038925</a>           | <a href="#">330216</a>    | cDNA sequence BC038925          | <a href="#">BC038925</a>           | 0.936 | -0.592 | 0.572088  | 0.796172 |
| 13829 | 10500268 | <a href="#">NM_078479</a>          | <a href="#">66292</a>     | mitochondrial ribosomal protei  | <a href="#">Mrps21</a>             | 0.935 | -1.551 | 0.163589  | 0.412809 |
| 13830 | 10459614 | <a href="#">ENSMUST00000025428</a> | <a href="#">78931</a>     | RIKEN cDNA 4930546C10           | <a href="#">4930546C10Rik</a>      | 0.935 | -0.651 | 0.53508   | 0.768753 |
| 13831 | 10406530 | <a href="#">NM_025335</a>          | <a href="#">66074</a>     | gene transmembrane protein 167  | <a href="#">Tmem167</a>            | 0.935 | -1.069 | 0.319571  | 0.596487 |
| 13832 | 10431229 | <a href="#">NM_009886</a>          | <a href="#">12614</a>     | cadherin, EGF LAG seven-pass G  | <a href="#">Celsr1</a>             | 0.935 | -1.151 | 0.286645  | 0.562228 |
| 13833 | 10476072 | <a href="#">NM_138655</a>          | <a href="#">192140</a>    | transmembrane channel-like gen  | <a href="#">Tmc2</a>               | 0.935 | -0.636 | 0.544716  | 0.776896 |
| 13834 | 10478744 |                                    |                           |                                 |                                    | 0.935 | -0.097 | 0.925152  | 0.970405 |
| 13835 | 10552526 | <a href="#">NM_026806</a>          | <a href="#">68668</a>     | kallikrein related-peptidase 5  | <a href="#">Klk5</a>               | 0.935 | -0.408 | 0.695374  | 0.866211 |
| 13836 | 10452022 | <a href="#">NM_174989</a>          | <a href="#">106759</a>    | toll-like receptor adaptor mol  | <a href="#">Ticam1</a>             | 0.935 | -1.193 | 0.270706  | 0.545331 |
| 13837 | 10431220 | <a href="#">BC025858</a>           | <a href="#">72355</a>     | RIKEN cDNA 2210021J22 gene      | <a href="#">2210021J22Rik</a>      | 0.935 | -1.239 | 0.254237  | 0.528521 |
| 13838 | 10475965 | <a href="#">NM_009086</a>          | <a href="#">20017</a>     | RNA polymerase 1-2              | <a href="#">Rpo1-2</a>             | 0.935 | -1.263 | 0.245923  | 0.51897  |
| 13839 | 10482731 | <a href="#">NM_018785</a>          | <a href="#">56194</a>     | PRP40 pre-mRNA processing fact  | <a href="#">Prpf40a</a>            | 0.935 | -1.454 | 0.188079  | 0.446224 |
| 13840 | 10390763 | <a href="#">NM_007719</a>          | <a href="#">12775</a>     | chemokine (C-C motif) receptor  | <a href="#">Cer7</a>               | 0.935 | -1.157 | 0.284174  | 0.559417 |
| 13841 | 10458368 | <a href="#">NM_172831</a>          | <a href="#">240216</a>    | Riken cDNA E230025N22 gene      | <a href="#">E230025N22Rik</a>      | 0.935 | -1.247 | 0.251382  | 0.525502 |
| 13842 | 10384208 |                                    |                           |                                 |                                    | 0.935 | -0.336 | 0.746663  | 0.892399 |
| 13843 | 10440333 | <a href="#">NM_173069</a>          | <a href="#">224318</a>    | spermatogenesis associated glu  | <a href="#">Speer2</a>             | 0.935 | -0.607 | 0.562688  | 0.789779 |
| 13844 | 10460560 | <a href="#">NM_139301</a>          | <a href="#">225865</a>    | cation channel of sperm 1       | <a href="#">Catsper1</a>           | 0.935 | -0.399 | 0.701229  | 0.869046 |
| 13845 | 10489346 | <a href="#">XR_032746</a>          | <a href="#">241765</a>    | glyceraldehyde-3-phosphate deh  | <a href="#">LOC241765</a>          | 0.935 | -1.334 | 0.222752  | 0.492656 |
| 13846 | 10559185 | <a href="#">NM_018802</a>          | <a href="#">55925</a>     | synaptotagmin VIII              | <a href="#">Syt8</a>               | 0.935 | -0.741 | 0.481948  | 0.730954 |
| 13847 | 10449968 | <a href="#">ENSMUST00000025144</a> | <a href="#">77875</a>     | cytochrome P450, family 4, sub  | <a href="#">Cyp4f41-ps</a>         | 0.935 | -1.008 | 0.345939  | 0.620086 |
| 13848 | 10510859 | <a href="#">ENSMUST00000030897</a> | <a href="#">230971</a>    | multiple EGF-like-domains 6     | <a href="#">Mef6</a>               | 0.935 | -0.64  | 0.542024  | 0.774466 |
| 13849 | 10352661 | <a href="#">NM_008976</a>          | <a href="#">19250</a>     | protein tyrosine phosphatase,   | <a href="#">Ptpn14</a>             | 0.935 | -1.774 | 0.118156  | 0.343124 |
| 13850 | 10439985 | <a href="#">NM_029092</a>          | <a href="#">52575</a>     | RNA (guanine-9-) methyltransfe  | <a href="#">Rg9mtd1</a>            | 0.935 | -2.221 | 0.0606495 | 0.22717  |
| 13851 | 10574682 | <a href="#">NM_148952</a>          | <a href="#">104394</a>    | E2F transcription factor 4      | <a href="#">E2f4</a>               | 0.935 | -1.229 | 0.257526  | 0.531656 |
| 13852 | 10590320 | <a href="#">NM_025974</a>          | <a href="#">67115</a>     | ribosomal protein L14           | <a href="#">Rpl14</a>              | 0.935 | -1.539 | 0.166336  | 0.417201 |
| 13853 | 10600988 | <a href="#">NM_001081136</a>       | <a href="#">245533</a>    | diacylglycerol O-acyltransfera  | <a href="#">Dgat2l3</a>            | 0.935 | -1.011 | 0.344544  | 0.61884  |
| 13854 | 10418410 | <a href="#">NM_011103</a>          | <a href="#">18753</a>     | protein kinase C, delta         | <a href="#">Prked</a>              | 0.935 | -1.433 | 0.193822  | 0.453387 |
| 13855 | 10468810 | <a href="#">NM_201615</a>          | <a href="#">226278</a>    | prolactin releasing hormone re  | <a href="#">Prlhr</a>              | 0.935 | -1.172 | 0.278527  | 0.553444 |
| 13856 | 10387138 | <a href="#">NM_173754</a>          | <a href="#">216835</a>    | ubiquitin specific peptidase 4  | <a href="#">Usp43</a>              | 0.935 | -0.624 | 0.552021  | 0.781881 |
| 13857 | 10528951 | <a href="#">NM_001014394</a>       | <a href="#">381628</a>    | G protein-coupled receptor 113  | <a href="#">Gpr113</a>             | 0.935 | -0.995 | 0.351931  | 0.62505  |
| 13858 | 10555662 | <a href="#">NM_009710</a>          | <a href="#">11870</a>     | ADP-ribosyltransferase 1        | <a href="#">Art1</a>               | 0.935 | -0.835 | 0.430525  | 0.691299 |
| 13859 | 10406067 | <a href="#">NM_146047</a>          | <a href="#">218335</a>    | CLPTM1-like                     | <a href="#">Clptm1l</a>            | 0.935 | -1.425 | 0.195831  | 0.456219 |
| 13860 | 10489782 |                                    |                           |                                 |                                    | 0.935 | -2.112 | 0.0713786 | 0.250953 |
| 13861 | 10377418 | <a href="#">NM_028336</a>          | <a href="#">66910</a>     | transmembrane protein 107       | <a href="#">Tmem107</a>            | 0.935 | -1.48  | 0.181083  | 0.437031 |
| 13862 | 10415388 | <a href="#">NM_020490</a>          | <a href="#">57260</a>     | leukotriene B4 receptor 2       | <a href="#">Ltb4r2</a>             | 0.935 | -0.677 | 0.519784  | 0.757566 |
| 13863 | 10408266 | <a href="#">NM_175663</a>          | <a href="#">319177</a>    | histone cluster 1, H2ba         | <a href="#">Hist1h2ba</a>          | 0.935 | -1.41  | 0.200078  | 0.46189  |
| 13864 | 10474577 | <a href="#">BC080661</a>           | <a href="#">72425</a>     | RIKEN cDNA 2410042D21 gene      | <a href="#">2410042D21Rik</a>      | 0.935 | -1.417 | 0.198205  | 0.45902  |
| 13865 | 10432820 | <a href="#">NM_213728</a>          | <a href="#">105866</a>    | keratin 72                      | <a href="#">Krt72</a>              | 0.935 | -0.926 | 0.384248  | 0.653466 |
| 13866 | 10408487 | <a href="#">NM_025710</a>          | <a href="#">66694</a>     | ubiquinol-cytochrome c reducta  | <a href="#">Uqcrls1</a>            | 0.935 | -2.188 | 0.0637164 | 0.234381 |
| 13867 | 10563037 | <a href="#">NM_001008422</a>       | <a href="#">233208</a>    | SR-related CTD-associated fact  | <a href="#">Scaf1</a>              | 0.935 | -1.22  | 0.260797  | 0.535471 |
| 13868 | 10441055 | <a href="#">NM_019543</a>          | <a href="#">56176</a>     | phosphatidylinositol glycan an  | <a href="#">Pigp</a>               | 0.935 | -1.42  | 0.197377  | 0.457905 |

|       |          |                                    |                           |                                |                                    |       |        |          |          |
|-------|----------|------------------------------------|---------------------------|--------------------------------|------------------------------------|-------|--------|----------|----------|
| 13869 | 10447977 | <a href="#">NM_175173</a>          | <a href="#">71682</a>     | WD repeat domain 27            | <a href="#">Wdr27</a>              | 0.935 | -1.401 | 0.202809 | 0.465349 |
| 13870 | 10520833 | <a href="#">NM_025796</a>          | <a href="#">66845</a>     | mitochondrial ribosomal protei | <a href="#">Mrpl33</a>             | 0.935 | -1.382 | 0.208223 | 0.472843 |
| 13871 | 10437582 |                                    |                           |                                |                                    | 0.935 | -0.381 | 0.714126 | 0.874842 |
| 13872 | 10515399 | <a href="#">NM_013807</a>          | <a href="#">12795</a>     | polo-like kinase 3 (Drosophila | <a href="#">Pik3</a>               | 0.935 | -0.735 | 0.485546 | 0.733891 |
| 13873 | 10536697 | <a href="#">NM_080847</a>          | <a href="#">78910</a>     | ankyrin repeat and SOCS box-co | <a href="#">Asb15</a>              | 0.935 | -0.898 | 0.398375 | 0.66466  |
| 13874 | 10446545 | <a href="#">NM_177278</a>          | <a href="#">320858</a>    | l(3)mbt-like 4 (Drosophila)    | <a href="#">L3mbtl4</a>            | 0.935 | -0.976 | 0.360595 | 0.632365 |
| 13875 | 10496425 | <a href="#">NM_009626</a>          | <a href="#">11529</a>     | alcohol dehydrogenase 7 (class | <a href="#">Adh7</a>               | 0.935 | -0.643 | 0.540053 | 0.772571 |
| 13876 | 10440685 | <a href="#">NM_130857</a>          | <a href="#">77918</a>     | keratin associated protein 16- | <a href="#">Krtap16-5</a>          | 0.935 | -0.872 | 0.41144  | 0.675374 |
| 13877 | 10569008 | <a href="#">NM_007751</a>          | <a href="#">12869</a>     | cytochrome c oxidase, subunit  | <a href="#">Cox8b</a>              | 0.935 | -0.606 | 0.563188 | 0.789853 |
| 13878 | 10358849 | <a href="#">NM_007842</a>          | <a href="#">13211</a>     | DEAH (Asp-Glu-Ala-His) box pol | <a href="#">Dhx9</a>               | 0.935 | -1.574 | 0.158334 | 0.405255 |
| 13879 | 10372280 | <a href="#">ENSMUST00000116233</a> | <a href="#">628870</a>    | predicted gene, EG628870       | <a href="#">EG628870</a>           | 0.935 | -0.873 | 0.410656 | 0.67503  |
| 13880 | 10416837 | <a href="#">NM_008392</a>          | <a href="#">16365</a>     | immunoresponsive gene 1        | <a href="#">Irg1</a>               | 0.935 | -0.53  | 0.612301 | 0.820234 |
| 13881 | 10571747 |                                    |                           |                                |                                    | 0.935 | -0.327 | 0.752656 | 0.895764 |
| 13882 | 10599670 |                                    |                           |                                |                                    | 0.935 | -0.68  | 0.517602 | 0.756753 |
| 13883 | 10362490 | <a href="#">NM_030203</a>          | <a href="#">72480</a>     | TSPY-like 4                    | <a href="#">Tspyl4</a>             | 0.935 | -0.927 | 0.384018 | 0.653442 |
| 13884 | 10362289 |                                    |                           |                                |                                    | 0.935 | -0.351 | 0.735572 | 0.886814 |
| 13885 | 10580522 | <a href="#">NM_172913</a>          | <a href="#">244579</a>    | TOX high mobility group box fa | <a href="#">Tox3</a>               | 0.935 | -1.274 | 0.242307 | 0.515166 |
| 13886 | 10457884 | <a href="#">ENSMUST00000067987</a> | <a href="#">78597</a>     | predicted gene, ENSMUSG0000005 | <a href="#">ENSMUSG00000054745</a> | 0.935 | -0.841 | 0.427483 | 0.688756 |
| 13887 | 10420316 | <a href="#">ENSMUST00000100516</a> | <a href="#">100038506</a> | predicted gene, ENSMUSG0000007 | <a href="#">ENSMUSG00000075584</a> | 0.935 | -0.799 | 0.449758 | 0.707093 |
| 13888 | 10451805 | <a href="#">NM_028232</a>          | <a href="#">72415</a>     | shugoshin-like 1 (S. pombe)    | <a href="#">Sgol1</a>              | 0.935 | -1.294 | 0.235711 | 0.507471 |
| 13889 | 10570321 | <a href="#">NM_146207</a>          | <a href="#">99375</a>     | cullin 4A                      | <a href="#">Cul4a</a>              | 0.935 | -1.748 | 0.122639 | 0.350324 |
| 13890 | 10532905 | <a href="#">ENSMUST00000066959</a> | <a href="#">791292</a>    | predicted gene, ENSMUSG0000005 | <a href="#">ENSMUSG00000054123</a> | 0.935 | -1.401 | 0.202766 | 0.465349 |
| 13891 | 10356866 | <a href="#">NM_008798</a>          | <a href="#">18566</a>     | programmed cell death 1        | <a href="#">Pcdcl1</a>             | 0.935 | -0.469 | 0.652977 | 0.844541 |
| 13892 | 10545917 | <a href="#">NM_011865</a>          | <a href="#">23983</a>     | poly(rC) binding protein 1     | <a href="#">Pcbp1</a>              | 0.935 | -1.734 | 0.12527  | 0.354486 |
| 13893 | 10346607 | <a href="#">NM_008057</a>          | <a href="#">14369</a>     | frizzled homolog 7 (Drosophila | <a href="#">Fzd7</a>               | 0.935 | -1.421 | 0.19717  | 0.457903 |
| 13894 | 10377001 | <a href="#">BC110628</a>           | <a href="#">338369</a>    | RIKEN cDNA A730055C05 gene     | <a href="#">A730055C05Rik</a>      | 0.935 | -0.721 | 0.493744 | 0.739216 |
| 13895 | 10511442 |                                    |                           |                                |                                    | 0.935 | -1.436 | 0.19283  | 0.452269 |
| 13896 | 10512236 | <a href="#">NM_024241</a>          | <a href="#">109242</a>    | kinesin family member 24       | <a href="#">Kif24</a>              | 0.935 | -1.282 | 0.239523 | 0.512495 |
| 13897 | 10383429 | <a href="#">NM_153288</a>          | <a href="#">208990</a>    | neuropeptide B                 | <a href="#">Npb</a>                | 0.935 | -0.856 | 0.419511 | 0.681847 |
| 13898 | 10386844 | <a href="#">BC109343</a>           | <a href="#">69747</a>     | RIKEN cDNA 2410012H22 gene     | <a href="#">2410012H22Rik</a>      | 0.935 | -1.183 | 0.27433  | 0.548974 |
| 13899 | 10401743 | <a href="#">BC125331</a>           | <a href="#">71275</a>     | RIKEN cDNA 4933437F05 gene     | <a href="#">4933437F05Rik</a>      | 0.935 | -1.245 | 0.252199 | 0.526303 |
| 13900 | 10372110 | <a href="#">ENSMUST00000060761</a> | <a href="#">18687</a>     | per-hexamer repeat gene 2      | <a href="#">Phxr2</a>              | 0.935 | -1.1   | 0.306588 | 0.58301  |
| 13901 | 10404264 | <a href="#">NM_011164</a>          | <a href="#">19109</a>     | prolactin                      | <a href="#">Prl</a>                | 0.934 | -0.837 | 0.429542 | 0.690559 |
| 13902 | 10381072 | <a href="#">NM_011799</a>          | <a href="#">23834</a>     | cell division cycle 6 homolog  | <a href="#">Cdc6</a>               | 0.934 | -0.733 | 0.486496 | 0.734369 |
| 13903 | 10395328 | <a href="#">NM_001014973</a>       | <a href="#">217463</a>    | sorting nexin 13               | <a href="#">Snx13</a>              | 0.934 | -1.193 | 0.270699 | 0.545331 |
| 13904 | 10525880 | <a href="#">BC053444</a>           | <a href="#">73121</a>     | RIKEN cDNA 3110032G18 gene     | <a href="#">3110032G18Rik</a>      | 0.934 | -0.921 | 0.386739 | 0.655803 |
| 13905 | 10478776 | <a href="#">NM_001085495</a>       | <a href="#">99371</a>     | ADP-ribosylation factor guanin | <a href="#">Arfgef2</a>            | 0.934 | -0.907 | 0.393772 | 0.661649 |
| 13906 | 10470834 | <a href="#">NM_001076554</a>       | <a href="#">20740</a>     | spectrin alpha 2               | <a href="#">Spna2</a>              | 0.934 | -1.847 | 0.105938 | 0.320958 |
| 13907 | 10541349 |                                    |                           |                                |                                    | 0.934 | -1.18  | 0.275401 | 0.550282 |
| 13908 | 10402761 | <a href="#">NM_178915</a>          | <a href="#">104885</a>    | transmembrane protein 179      | <a href="#">Tmem179</a>            | 0.934 | -0.436 | 0.675262 | 0.855723 |
| 13909 | 10438889 | <a href="#">ENSMUST00000070439</a> | <a href="#">320589</a>    | RIKEN cDNA 9530020O07 gene     | <a href="#">9530020O07Rik</a>      | 0.934 | -1.346 | 0.219068 | 0.487473 |
| 13910 | 10348489 | <a href="#">NM_001101647</a>       | <a href="#">623503</a>    | prolactin releasing hormone    | <a href="#">Prlh</a>               | 0.934 | -0.443 | 0.670957 | 0.853953 |
| 13911 | 10463930 | <a href="#">NM_010847</a>          | <a href="#">17859</a>     | Max interacting protein 1      | <a href="#">Mxi1</a>               | 0.934 | -1.333 | 0.223128 | 0.49298  |
| 13912 | 10357917 | <a href="#">NM_020588</a>          | <a href="#">57439</a>     | transmembrane protein 183A     | <a href="#">Tmem183a</a>           | 0.934 | -1.433 | 0.193624 | 0.453103 |
| 13913 | 10388898 | <a href="#">BC027022</a>           | <a href="#">69109</a>     | RIKEN cDNA 1810009O10 gene     | <a href="#">1810009O10Rik</a>      | 0.934 | -1.174 | 0.277526 | 0.552648 |
| 13914 | 10413897 | <a href="#">NM_001081221</a>       | <a href="#">319955</a>    | excision repair cross-compleme | <a href="#">Ercc6</a>              | 0.934 | -1.72  | 0.127938 | 0.358673 |
| 13915 | 10583264 | <a href="#">NM_018736</a>          | <a href="#">17535</a>     | meiotic recombination 11 homol | <a href="#">Mre11a</a>             | 0.934 | -1.321 | 0.22687  | 0.497571 |
| 13916 | 10511042 | <a href="#">BC113168</a>           | <a href="#">381581</a>    | RIKEN cDNA C030017K20 gene     | <a href="#">C030017K20Rik</a>      | 0.934 | -0.643 | 0.540211 | 0.772711 |
| 13917 | 10461690 | <a href="#">NM_001033174</a>       | <a href="#">76303</a>     | oxysterol binding protein      | <a href="#">Osbp</a>               | 0.934 | -0.96  | 0.368359 | 0.639194 |

|       |          |                                    |                           |                                |                                    |       |        |           |          |
|-------|----------|------------------------------------|---------------------------|--------------------------------|------------------------------------|-------|--------|-----------|----------|
| 13918 | 10596185 | <a href="#">NM_175565</a>          | <a href="#">321022</a>    | carnitine deficiency-associate | <a href="#">Cdv3</a>               | 0.934 | -1.711 | 0.129592  | 0.361014 |
| 13919 | 10441740 | <a href="#">NM_026644</a>          | <a href="#">68262</a>     | 1-acylglycerol-3-phosphate O-a | <a href="#">Agpat4</a>             | 0.934 | -1.824 | 0.109593  | 0.327201 |
| 13920 | 10544365 | <a href="#">NM_001007572</a>       | <a href="#">194352</a>    | transient receptor potential c | <a href="#">Trpv5</a>              | 0.934 | -0.29  | 0.780101  | 0.910713 |
| 13921 | 10381962 | <a href="#">NM_207624</a>          | <a href="#">11421</a>     | angiotensin I converting enzym | <a href="#">Ace</a>                | 0.934 | -0.807 | 0.445253  | 0.70357  |
| 13922 | 10603270 | <a href="#">NM_009757</a>          | <a href="#">12155</a>     | bone morphogenetic protein 15  | <a href="#">Bmp15</a>              | 0.934 | -0.755 | 0.47415   | 0.725639 |
| 13923 | 10500443 | <a href="#">NM_146275</a>          | <a href="#">258272</a>    | olfactory receptor 1402        | <a href="#">Olf1402</a>            | 0.934 | -0.677 | 0.519809  | 0.757566 |
| 13924 | 10573566 | <a href="#">NM_001039514</a>       | <a href="#">330817</a>    | deoxyhypusine synthase         | <a href="#">Dhps</a>               | 0.934 | -1.251 | 0.249947  | 0.524217 |
| 13925 | 10396079 | <a href="#">NM_178253</a>          | <a href="#">271005</a>    | kelch domain containing 1      | <a href="#">Klhdc1</a>             | 0.934 | -1.03  | 0.336483  | 0.61218  |
| 13926 | 10535043 | <a href="#">NM_008808</a>          | <a href="#">18590</a>     | platelet derived growth factor | <a href="#">Pdgfa</a>              | 0.934 | -0.879 | 0.407647  | 0.672017 |
| 13927 | 10428066 | <a href="#">AK006993</a>           | <a href="#">73486</a>     | RIKEN cDNA 1700084J12 gene     | <a href="#">1700084J12Rik</a>      | 0.934 | -0.583 | 0.577539  | 0.797771 |
| 13928 | 10416037 | <a href="#">NM_023209</a>          | <a href="#">52033</a>     | PDZ binding kinase             | <a href="#">Pbk</a>                | 0.934 | -0.925 | 0.385041  | 0.654288 |
| 13929 | 10512807 | <a href="#">NM_001081141</a>       | <a href="#">242425</a>    | gamma-aminobutyric acid (GABA) | <a href="#">Gabbr2</a>             | 0.934 | -1.597 | 0.153072  | 0.397119 |
| 13930 | 10583465 | <a href="#">NM_025401</a>          | <a href="#">66177</a>     | ubiquitin-like 5               | <a href="#">Ubl5</a>               | 0.934 | -1.68  | 0.135655  | 0.371434 |
| 13931 | 10401002 | <a href="#">NM_175644</a>          | <a href="#">217674</a>    | glycoprotein hormone beta 5    | <a href="#">Gphb5</a>              | 0.934 | -0.737 | 0.48425   | 0.732769 |
| 13932 | 10535312 | <a href="#">NM_178702</a>          | <a href="#">231858</a>    | RIKEN cDNA D930005D10 gene     | <a href="#">D930005D10Rik</a>      | 0.934 | -1.273 | 0.242682  | 0.515498 |
| 13933 | 10350594 | <a href="#">NM_054102</a>          | <a href="#">117198</a>    | influenza virus NS1A binding p | <a href="#">Ivns1abp</a>           | 0.934 | -1.408 | 0.200741  | 0.462663 |
| 13934 | 10501302 | <a href="#">NM_008596</a>          | <a href="#">17306</a>     | synaptophysin-like 2           | <a href="#">Sypl2</a>              | 0.934 | -1.008 | 0.345973  | 0.620094 |
| 13935 | 10417869 | <a href="#">NM_009674</a>          | <a href="#">11750</a>     | annexin A7                     | <a href="#">Anxa7</a>              | 0.934 | -1.168 | 0.280094  | 0.55551  |
| 13936 | 10471360 | <a href="#">NM_133852</a>          | <a href="#">99412</a>     | golgi autoantigen, golgin subf | <a href="#">Golga2</a>             | 0.934 | -1.514 | 0.172551  | 0.424877 |
| 13937 | 10451675 |                                    |                           |                                |                                    | 0.934 | -1.205 | 0.266202  | 0.541183 |
| 13938 | 10457838 | <a href="#">BC117067</a>           | <a href="#">328918</a>    | RIKEN cDNA C230097I24 gene     | <a href="#">C230097I24Rik</a>      | 0.934 | -1.04  | 0.331895  | 0.608173 |
| 13939 | 10569458 | <a href="#">NM_013742</a>          | <a href="#">27267</a>     | cysteinyl-tRNA synthetase      | <a href="#">Cars</a>               | 0.934 | -1.755 | 0.121451  | 0.347955 |
| 13940 | 10604982 | <a href="#">NM_001100461</a>       | <a href="#">385377</a>    | paraneoplastic antigen family  | <a href="#">Pnma5</a>              | 0.934 | -0.464 | 0.656628  | 0.846261 |
| 13941 | 10599693 | <a href="#">BC052359</a>           | <a href="#">320237</a>    | RIKEN cDNA 6330419J24 gene     | <a href="#">6330419J24Rik</a>      | 0.934 | -1.208 | 0.265325  | 0.540466 |
| 13942 | 10525588 | <a href="#">NM_198611</a>          | <a href="#">231727</a>    | UDP-GlcNAc:betaGal beta-1,3-N- | <a href="#">B3gnt4</a>             | 0.934 | -1.011 | 0.344782  | 0.618903 |
| 13943 | 10474079 | <a href="#">ENSMUST00000099692</a> | <a href="#">100038360</a> | predicted gene, ENSMUSG0000007 | <a href="#">ENSMUSG00000075024</a> | 0.934 | -0.867 | 0.4136    | 0.677093 |
| 13944 | 10364326 | <a href="#">NM_001024709</a>       | <a href="#">544710</a>    | predicted gene, EG544710       | <a href="#">EG544710</a>           | 0.934 | -0.212 | 0.838169  | 0.934421 |
| 13945 | 10497713 | <a href="#">NM_021483</a>          | <a href="#">58869</a>     | peroxisomal biogenesis factor  | <a href="#">Pex5l</a>              | 0.934 | -1.489 | 0.178883  | 0.43395  |
| 13946 | 10492997 | <a href="#">NM_001083318</a>       | <a href="#">27049</a>     | ets variant gene 3             | <a href="#">Etv3</a>               | 0.934 | -0.587 | 0.57496   | 0.797076 |
| 13947 | 10414697 | <a href="#">ENSMUST00000103567</a> | <a href="#">627171</a>    | predicted gene, OTTMUSG0000001 | <a href="#">OTTMUSG00000015242</a> | 0.934 | -0.508 | 0.626447  | 0.829976 |
| 13948 | 10570870 | <a href="#">ENSMUST00000068068</a> | <a href="#">73299</a>     | RIKEN cDNA 1700041G16 gene     | <a href="#">1700041G16Rik</a>      | 0.934 | -0.93  | 0.382341  | 0.651795 |
| 13949 | 10447693 |                                    |                           |                                |                                    | 0.934 | -0.587 | 0.575407  | 0.797076 |
| 13950 | 10519945 | <a href="#">NM_177601</a>          | <a href="#">212090</a>    | transmembrane protein 60       | <a href="#">Tmem60</a>             | 0.934 | -1.732 | 0.125626  | 0.354875 |
| 13951 | 10371987 | <a href="#">NM_019648</a>          | <a href="#">56307</a>     | methionine aminopeptidase 2    | <a href="#">Metap2</a>             | 0.934 | -1.928 | 0.0939275 | 0.297484 |
| 13952 | 10352794 | <a href="#">ENSMUST00000097436</a> | <a href="#">100038712</a> | predicted gene, ENSMUSG0000007 | <a href="#">ENSMUSG00000073476</a> | 0.934 | -1.134 | 0.293182  | 0.569293 |
| 13953 | 10362758 | <a href="#">NM_153398</a>          | <a href="#">268294</a>    | zinc finger and BTB domain con | <a href="#">Zbtb24</a>             | 0.934 | -1.086 | 0.312448  | 0.588806 |
| 13954 | 10550698 | <a href="#">NM_007710</a>          | <a href="#">12715</a>     | creatine kinase, muscle        | <a href="#">Ckm</a>                | 0.934 | -0.861 | 0.416816  | 0.679627 |
| 13955 | 10495107 | <a href="#">NM_009631</a>          | <a href="#">11542</a>     | adenosine A3 receptor          | <a href="#">Adora3</a>             | 0.934 | -1.157 | 0.284153  | 0.559417 |
| 13956 | 10436781 | <a href="#">ENSMUST00000099559</a> | <a href="#">100038709</a> | predicted gene, ENSMUSG0000007 | <a href="#">ENSMUSG00000074924</a> | 0.934 | -0.459 | 0.660026  | 0.848652 |
| 13957 | 10564326 | <a href="#">NM_183087</a>          | <a href="#">70638</a>     | RIKEN cDNA 5730507A09 gene     | <a href="#">5730507A09Rik</a>      | 0.934 | -0.984 | 0.35685   | 0.629197 |
| 13958 | 10387768 | <a href="#">NM_017366</a>          | <a href="#">11370</a>     | acyl-Coenzyme A dehydrogenase, | <a href="#">Acadyl</a>             | 0.934 | -1.559 | 0.161742  | 0.410008 |
| 13959 | 10513822 | <a href="#">XR_032571</a>          | <a href="#">242497</a>    | similar to eukaryotic translat | <a href="#">LOC242497</a>          | 0.934 | -1.313 | 0.229312  | 0.500317 |
| 13960 | 10552240 | <a href="#">ENSMUST00000052454</a> | <a href="#">78547</a>     | RIKEN cDNA E130304I02 gene     | <a href="#">E130304I02Rik</a>      | 0.934 | -0.514 | 0.622568  | 0.827273 |
| 13961 | 10568260 | <a href="#">NM_177226</a>          | <a href="#">320683</a>    | zinc finger protein 629        | <a href="#">Zfp629</a>             | 0.934 | -1.448 | 0.189679  | 0.44816  |
| 13962 | 10414433 | <a href="#">NM_172600</a>          | <a href="#">218989</a>    | RIKEN cDNA 6720456H20 gene     | <a href="#">6720456H20Rik</a>      | 0.934 | -1.117 | 0.299901  | 0.575946 |
| 13963 | 10489053 | <a href="#">ENSMUST00000099141</a> | <a href="#">74704</a>     | RIKEN cDNA 4930518I15 gene     | <a href="#">4930518I15Rik</a>      | 0.934 | -0.587 | 0.575132  | 0.797076 |
| 13964 | 10514304 | <a href="#">BC053719</a>           | <a href="#">381590</a>    | expressed sequence C87499      | <a href="#">C87499</a>             | 0.934 | -0.439 | 0.673856  | 0.855069 |
| 13965 | 10532317 | <a href="#">NM_145147</a>          | <a href="#">107999</a>    | GTP binding protein 6 (putativ | <a href="#">Gtbp6</a>              | 0.934 | -1.274 | 0.24229   | 0.515166 |

|       |          |                                    |                           |                                        |                                    |       |        |           |          |
|-------|----------|------------------------------------|---------------------------|----------------------------------------|------------------------------------|-------|--------|-----------|----------|
| 13966 | 10498620 | <a href="#">NM_025863</a>          | <a href="#">66949</a>     | tripartite motif-containing 59         | <a href="#">Trim59</a>             | 0.934 | -0.936 | 0.319358  | 0.649122 |
| 13967 | 10401416 |                                    |                           |                                        |                                    | 0.934 | -1.065 | 0.321378  | 0.598118 |
| 13968 | 10408902 | <a href="#">NM_001081059</a>       | <a href="#">76137</a>     | coiled-coil domain containing          | <a href="#">Ccdc90a</a>            | 0.934 | -1.277 | 0.241067  | 0.513985 |
| 13969 | 10467688 | <a href="#">NM_025644</a>          | <a href="#">66583</a>     | exosome component 1                    | <a href="#">Exosc1</a>             | 0.934 | -0.984 | 0.357192  | 0.629582 |
| 13970 | 10384221 | <a href="#">XR_032579</a>          | <a href="#">665343</a>    | similar to HSP-90                      | <a href="#">LOC665343</a>          | 0.934 | -0.458 | 0.660665  | 0.848802 |
| 13971 | 10430467 | <a href="#">NM_020516</a>          | <a href="#">57274</a>     | solute carrier family 16 (mono         | <a href="#">Slc16a8</a>            | 0.934 | -0.685 | 0.514873  | 0.754817 |
| 13972 | 10588203 | <a href="#">NM_024291</a>          | <a href="#">16716</a>     | kyphoscoliosis peptidase               | <a href="#">Ky</a>                 | 0.934 | -0.794 | 0.452465  | 0.709029 |
| 13973 | 10397275 |                                    |                           |                                        |                                    | 0.934 | -0.277 | 0.789221  | 0.914259 |
| 13974 | 10412713 |                                    |                           |                                        |                                    | 0.934 | -0.855 | 0.41987   | 0.682115 |
| 13975 | 10459944 | <a href="#">NM_198429</a>          | <a href="#">18018</a>     | nuclear factor of activated T-         | <a href="#">Nfatc1</a>             | 0.933 | -0.855 | 0.420278  | 0.682515 |
| 13976 | 10418475 | <a href="#">NM_026911</a>          | <a href="#">69019</a>     | signal peptidase complex subun         | <a href="#">Spes1</a>              | 0.933 | -1.462 | 0.18598   | 0.44418  |
| 13977 | 10575255 | <a href="#">NM_001039700</a>       | <a href="#">244646</a>    | polycystic kidney disease 1 li         | <a href="#">Pkd113</a>             | 0.933 | -1.011 | 0.344612  | 0.61884  |
| 13978 | 10605113 | <a href="#">NM_008478</a>          | <a href="#">16728</a>     | L1 cell adhesion molecule              | <a href="#">L1cam</a>              | 0.933 | -0.958 | 0.369247  | 0.639896 |
| 13979 | 10473024 | <a href="#">NM_172666</a>          | <a href="#">228061</a>    | alkylglycerone phosphate synth         | <a href="#">Agps</a>               | 0.933 | -1.817 | 0.110837  | 0.329565 |
| 13980 | 10459455 | <a href="#">ENSMUST00000035548</a> | <a href="#">225638</a>    | alpha-kinase 2                         | <a href="#">Alpk2</a>              | 0.933 | -0.658 | 0.530781  | 0.76539  |
| 13981 | 10379689 | <a href="#">NM_027427</a>          | <a href="#">70439</a>     | TAF15 RNA polymerase II,<br>TATA       | <a href="#">Taf15</a>              | 0.933 | -1.191 | 0.271454  | 0.546126 |
| 13982 | 10608193 | <a href="#">NM_011564</a>          | <a href="#">21674</a>     | sex determining region of Chr          | <a href="#">Sry</a>                | 0.933 | -0.209 | 0.840035  | 0.935328 |
| 13983 | 10416006 | <a href="#">ENSMUST00000079469</a> | <a href="#">239151</a>    | gene model 600, (NCBI)                 | <a href="#">Gm600</a>              | 0.933 | -0.606 | 0.563195  | 0.789853 |
| 13984 | 10414661 | <a href="#">XR_032084</a>          | <a href="#">667348</a>    | similar to Ac2-210                     | <a href="#">LOC667348</a>          | 0.933 | -1.8   | 0.113704  | 0.334282 |
| 13985 | 10526339 | <a href="#">NM_178240</a>          | <a href="#">215061</a>    | tripartite motif-containing 50         | <a href="#">Trim50</a>             | 0.933 | -1.195 | 0.269744  | 0.544449 |
| 13986 | 10464704 | <a href="#">NM_130863</a>          | <a href="#">110355</a>    | adrenergic receptor kinase, be         | <a href="#">Adrbk1</a>             | 0.933 | -1.546 | 0.164721  | 0.414577 |
| 13987 | 10497703 | <a href="#">NM_029017</a>          | <a href="#">74600</a>     | mitochondrial ribosomal protei         | <a href="#">Mrpl47</a>             | 0.933 | -1.091 | 0.310346  | 0.587004 |
| 13988 | 10344620 | <a href="#">ENSMUST00000097833</a> | <a href="#">100038431</a> | predicted gene,<br>ENSMUSG0000007      | <a href="#">ENSMUSG00000073742</a> | 0.933 | -0.959 | 0.368828  | 0.639536 |
| 13989 | 10437765 | <a href="#">BC034347</a>           | <a href="#">223978</a>    | RIKEN cDNA C530044N13<br>gene          | <a href="#">C530044N13Rik</a>      | 0.933 | -0.845 | 0.425088  | 0.687003 |
| 13990 | 10532368 | <a href="#">NM_028596</a>          | <a href="#">381668</a>    | RIKEN cDNA 2410025L10 gene             | <a href="#">2410025L10Rik</a>      | 0.933 | -1.32  | 0.22703   | 0.497805 |
| 13991 | 10516024 | <a href="#">NM_001081312</a>       | <a href="#">69469</a>     | transmembrane and coiled-coil          | <a href="#">Tmco2</a>              | 0.933 | -0.396 | 0.703744  | 0.870071 |
| 13992 | 10370587 | <a href="#">NM_001024539</a>       | <a href="#">216148</a>    | src homology 2 domain-containi         | <a href="#">Shc2</a>               | 0.933 | -1.189 | 0.27225   | 0.546879 |
| 13993 | 10368475 |                                    |                           |                                        |                                    | 0.933 | -1.486 | 0.179751  | 0.43509  |
| 13994 | 10586017 | <a href="#">NM_028283</a>          | <a href="#">72565</a>     | uveal autoantigen with coiled-         | <a href="#">Uaca</a>               | 0.933 | -1.128 | 0.295609  | 0.57201  |
| 13995 | 10606912 |                                    |                           |                                        |                                    | 0.933 | -1.223 | 0.259867  | 0.53415  |
| 13996 | 10420877 | <a href="#">NM_028039</a>          | <a href="#">71988</a>     | establishment of cohesion 1 ho         | <a href="#">Esco2</a>              | 0.933 | -1.089 | 0.311404  | 0.587941 |
| 13997 | 10569877 | <a href="#">NM_026985</a>          | <a href="#">69189</a>     | RIKEN cDNA 1810033B17<br>gene          | <a href="#">1810033B17Rik</a>      | 0.933 | -1.048 | 0.32827   | 0.604687 |
| 13998 | 10582694 | <a href="#">BC115734</a>           | <a href="#">69627</a>     | RIKEN cDNA 2310031A18                  | <a href="#">2310031A18Rik</a>      | 0.933 | -0.746 | 0.479059  | 0.729179 |
| 13999 | 10459858 | <a href="#">NM_001101038</a>       | <a href="#">620235</a>    | gene<br>sialic acid binding Ig-like le | <a href="#">Siglec15</a>           | 0.933 | -0.658 | 0.530924  | 0.765398 |
| 14000 | 10550925 | <a href="#">NM_146183</a>          | <a href="#">232969</a>    | zinc finger protein 428                | <a href="#">Zfp428</a>             | 0.933 | -0.97  | 0.363216  | 0.634435 |
| 14001 | 10502714 | <a href="#">NM_027371</a>          | <a href="#">70285</a>     | brix domain containing 5               | <a href="#">Bxdc5</a>              | 0.933 | -1.627 | 0.14645   | 0.388184 |
| 14002 | 10583090 | <a href="#">NM_019471</a>          | <a href="#">17384</a>     | matrix metalloproteinase 10            | <a href="#">Mmp10</a>              | 0.933 | -0.984 | 0.356753  | 0.629197 |
| 14003 | 10432032 | <a href="#">NM_009504</a>          | <a href="#">22337</a>     | vitamin D receptor                     | <a href="#">Vdr</a>                | 0.933 | -1.055 | 0.325693  | 0.601982 |
| 14004 | 10569985 | <a href="#">NM_145591</a>          | <a href="#">233987</a>    | cDNA sequence BC003267                 | <a href="#">BC003267</a>           | 0.933 | -1.394 | 0.204758  | 0.468195 |
| 14005 | 10409629 | <a href="#">ENSMUST00000091583</a> | <a href="#">627648</a>    | predicted gene, EG627648               | <a href="#">EG627648</a>           | 0.933 | -0.672 | 0.52256   | 0.759322 |
| 14006 | 10571114 | <a href="#">NM_153592</a>          | <a href="#">244373</a>    | ER lipid raft associated 2             | <a href="#">Erlin2</a>             | 0.933 | -1.24  | 0.253637  | 0.527897 |
| 14007 | 10452535 |                                    |                           |                                        |                                    | 0.933 | -1.249 | 0.250662  | 0.524426 |
| 14008 | 10567084 |                                    |                           |                                        |                                    | 0.933 | -0.467 | 0.654138  | 0.845112 |
| 14009 | 10579925 | <a href="#">NM_021356</a>          | <a href="#">14388</a>     | growth factor receptor bound p         | <a href="#">Gab1</a>               | 0.933 | -1.159 | 0.283494  | 0.558795 |
| 14010 | 10403925 |                                    |                           |                                        |                                    | 0.933 | -0.536 | 0.607906  | 0.817473 |
| 14011 | 10456423 | <a href="#">NM_001039088</a>       | <a href="#">72124</a>     | SEH1-like (S. cerevisiae)              | <a href="#">Seh1l</a>              | 0.933 | -2.223 | 0.0605263 | 0.22695  |
| 14012 | 10404675 | <a href="#">NM_026382</a>          | <a href="#">67797</a>     | RIKEN cDNA 6530403A03<br>gene          | <a href="#">6530403A03Rik</a>      | 0.933 | -1.813 | 0.111494  | 0.330405 |
| 14013 | 10513918 |                                    |                           |                                        |                                    | 0.933 | -1.319 | 0.227411  | 0.498174 |
| 14014 | 10346840 | <a href="#">XR_033701</a>          | <a href="#">667592</a>    | similar to ribosomal protein S         | <a href="#">LOC667592</a>          | 0.933 | -1.07  | 0.319285  | 0.596377 |
| 14015 | 10390961 | <a href="#">NM_001099774</a>       | <a href="#">77914</a>     | keratin associated protein 17-         | <a href="#">Krtap17-1</a>          | 0.933 | -0.608 | 0.562107  | 0.78919  |
| 14016 | 10376326 | <a href="#">NM_018738</a>          | <a href="#">16145</a>     | interferon gamma induced<br>GTPas      | <a href="#">Igtp</a>               | 0.933 | -1.169 | 0.279555  | 0.554795 |

|       |          |                                    |                           |                                |                                    |       |        |           |          |
|-------|----------|------------------------------------|---------------------------|--------------------------------|------------------------------------|-------|--------|-----------|----------|
| 14017 | 10487613 | <a href="#">NM_018863</a>          | <a href="#">18610</a>     | prodynorphin                   | <a href="#">Pdyn</a>               | 0.933 | -1.145 | 0.288601  | 0.564651 |
| 14018 | 10447880 | <a href="#">NM_026310</a>          | <a href="#">67681</a>     | mitochondrial ribosomal protei | <a href="#">Mrpl18</a>             | 0.933 | -1.445 | 0.190567  | 0.449454 |
| 14019 | 10364293 | <a href="#">NM_019803</a>          | <a href="#">22213</a>     | ubiquitin-conjugating enzyme E | <a href="#">Ube2g2</a>             | 0.933 | -1.04  | 0.331783  | 0.608173 |
| 14020 | 10491551 | <a href="#">NM_019393</a>          | <a href="#">50911</a>     | exosome component 9            | <a href="#">Exosc9</a>             | 0.933 | -1.619 | 0.1482    | 0.390374 |
| 14021 | 10428176 | <a href="#">NM_025712</a>          | <a href="#">66696</a>     | sorting nexin 31               | <a href="#">Snx31</a>              | 0.933 | -0.809 | 0.444161  | 0.702635 |
| 14022 | 10484884 | <a href="#">NM_146980</a>          | <a href="#">258982</a>    | olfactory receptor 1272        | <a href="#">Olfr1272</a>           | 0.933 | -0.931 | 0.382027  | 0.651575 |
| 14023 | 10390352 | <a href="#">NM_008379</a>          | <a href="#">16211</a>     | karyopherin (importin) beta 1  | <a href="#">Kpnb1</a>              | 0.933 | -1.792 | 0.11493   | 0.337218 |
| 14024 | 10495343 | <a href="#">NM_181400</a>          | <a href="#">99512</a>     | WD repeat domain 47            | <a href="#">Wdr47</a>              | 0.933 | -0.845 | 0.42543   | 0.687346 |
| 14025 | 10540838 | <a href="#">NM_178703</a>          | <a href="#">232333</a>    | solute carrier family 6 (neuro | <a href="#">Slc6a1</a>             | 0.933 | -0.863 | 0.416125  | 0.679215 |
| 14026 | 10349340 | <a href="#">NM_207233</a>          | <a href="#">226359</a>    | complement component 1, q subc | <a href="#">C1q12</a>              | 0.933 | -1.208 | 0.265082  | 0.540178 |
| 14027 | 10496475 | <a href="#">NM_007410</a>          | <a href="#">11532</a>     | alcohol dehydrogenase 5 (class | <a href="#">Adh5</a>               | 0.933 | -1.666 | 0.138449  | 0.376412 |
| 14028 | 10479869 | <a href="#">NM_133837</a>          | <a href="#">98828</a>     | cell division cycle 123 homolo | <a href="#">Cdc123</a>             | 0.933 | -1.777 | 0.117584  | 0.342028 |
| 14029 | 10355658 | <a href="#">NM_153111</a>          | <a href="#">260298</a>    | FEV (ETS oncogene family)      | <a href="#">Fev</a>                | 0.933 | -1.103 | 0.305439  | 0.581741 |
| 14030 | 10522973 | <a href="#">NM_023054</a>          | <a href="#">65961</a>     | UTP3, small subunit (SSU) proc | <a href="#">Utp3</a>               | 0.933 | -1.959 | 0.0897133 | 0.289125 |
| 14031 | 10485282 | <a href="#">NM_026944</a>          | <a href="#">69113</a>     | alkB, alkylation repair homolo | <a href="#">Alkbh3</a>             | 0.933 | -2.029 | 0.0807941 | 0.271356 |
| 14032 | 10466317 | <a href="#">NM_001039718</a>       | <a href="#">664779</a>    | zinc finger protein 91, ciliar | <a href="#">Zfp91-entf</a>         | 0.933 | -1.494 | 0.177617  | 0.43207  |
| 14033 | 10425914 | <a href="#">NM_023478</a>          | <a href="#">22270</a>     | uropod protein 3A              | <a href="#">Upk3a</a>              | 0.933 | -0.61  | 0.560895  | 0.788011 |
| 14034 | 10405822 | <a href="#">NM_053180</a>          | <a href="#">105278</a>    | cell cycle related kinase      | <a href="#">Cerk</a>               | 0.933 | -1.028 | 0.336979  | 0.6127   |
| 14035 | 10581031 | <a href="#">XM_001476323</a>       | <a href="#">100041397</a> | similar to retinitis pigmentos | <a href="#">LOC100041397</a>       | 0.933 | -0.436 | 0.675556  | 0.855911 |
| 14036 | 10390950 | <a href="#">NM_001100614</a>       | <a href="#">670496</a>    | similar to 2300006N05Rik prote | <a href="#">LOC670496</a>          | 0.933 | -0.253 | 0.807485  | 0.922441 |
| 14037 | 10374430 | <a href="#">NM_178909</a>          | <a href="#">103784</a>    | WD repeat domain 92            | <a href="#">Wdr92</a>              | 0.933 | -1.552 | 0.163281  | 0.412327 |
| 14038 | 10448292 | <a href="#">NM_001008425</a>       | <a href="#">386612</a>    | THO complex 6 homolog (Drosoph | <a href="#">Thoc6</a>              | 0.933 | -0.93  | 0.382218  | 0.651691 |
| 14039 | 10351471 |                                    |                           |                                |                                    | 0.933 | -0.332 | 0.749145  | 0.893951 |
| 14040 | 10376434 | <a href="#">NM_138678</a>          | <a href="#">192194</a>    | butyrophilin related 1         | <a href="#">Butr1</a>              | 0.933 | -0.797 | 0.450892  | 0.708135 |
| 14041 | 10553773 | <a href="#">NM_008071</a>          | <a href="#">14402</a>     | gamma-aminobutyric acid (GABA- | <a href="#">Gabrb3</a>             | 0.932 | -1.006 | 0.346852  | 0.621091 |
| 14042 | 10382508 | <a href="#">NM_026729</a>          | <a href="#">68572</a>     | immature colon carcinoma trans | <a href="#">Ict1</a>               | 0.932 | -1.872 | 0.10221   | 0.313502 |
| 14043 | 10591535 |                                    |                           |                                |                                    | 0.932 | -1.334 | 0.222932  | 0.492857 |
| 14044 | 10402572 | <a href="#">ENSMUST00000116391</a> | <a href="#">668158</a>    | predicted gene, EG668158       | <a href="#">EG668158</a>           | 0.932 | -1.212 | 0.263795  | 0.538698 |
| 14045 | 10402136 | <a href="#">NM_175493</a>          | <a href="#">238377</a>    | G protein-coupled receptor 68  | <a href="#">Gpr68</a>              | 0.932 | -1.454 | 0.187957  | 0.446224 |
| 14046 | 10469856 | <a href="#">NM_001031808</a>       | <a href="#">107733</a>    | mitochondrial ribosomal protei | <a href="#">Mrpl41</a>             | 0.932 | -1.633 | 0.145135  | 0.386782 |
| 14047 | 10566529 | <a href="#">NM_009906</a>          | <a href="#">12751</a>     | tripeptidyl peptidase I        | <a href="#">Tpp1</a>               | 0.932 | -1.241 | 0.253421  | 0.527654 |
| 14048 | 10563643 | <a href="#">NM_021884</a>          | <a href="#">22088</a>     | tumor susceptibility gene 101  | <a href="#">Tsg101</a>             | 0.932 | -1.272 | 0.242864  | 0.515832 |
| 14049 | 10429510 | <a href="#">NM_001081961</a>       | <a href="#">69462</a>     | RIKEN cDNA 2300005B03 gene     | <a href="#">2300005B03Rik</a>      | 0.932 | -0.674 | 0.521384  | 0.758794 |
| 14050 | 10391373 | <a href="#">NM_007721</a>          | <a href="#">12777</a>     | chemokine (C-C motif) receptor | <a href="#">Ccr10</a>              | 0.932 | -1.193 | 0.270516  | 0.545253 |
| 14051 | 10345509 | <a href="#">NM_009539</a>          | <a href="#">22637</a>     | zeta-chain (TCR) associated pr | <a href="#">Zap70</a>              | 0.932 | -0.56  | 0.592629  | 0.807299 |
| 14052 | 10585840 | <a href="#">ENSMUST00000098676</a> | <a href="#">100038634</a> | predicted gene, ENSMUSG0000007 | <a href="#">ENSMUSG00000074273</a> | 0.932 | -1.029 | 0.336963  | 0.6127   |
| 14053 | 10465224 | <a href="#">ENSMUST00000099954</a> | <a href="#">100038547</a> | predicted gene, ENSMUSG0000007 | <a href="#">ENSMUSG00000075240</a> | 0.932 | -1.22  | 0.260872  | 0.535507 |
| 14054 | 10446166 | <a href="#">BC059729</a>           | <a href="#">69875</a>     | NADH dehydrogenase (ubiquinone | <a href="#">Ndufa11</a>            | 0.932 | -1.694 | 0.132794  | 0.366458 |
| 14055 | 10455335 | <a href="#">NM_138945</a>          | <a href="#">18998</a>     | POU domain, class 4, transcrip | <a href="#">Pou4f3</a>             | 0.932 | -0.91  | 0.392343  | 0.660367 |
| 14056 | 10445430 | <a href="#">NM_026732</a>          | <a href="#">68463</a>     | mitochondrial ribosomal protei | <a href="#">Mrpl14</a>             | 0.932 | -1.238 | 0.254646  | 0.528904 |
| 14057 | 10557405 | <a href="#">NM_030566</a>          | <a href="#">70314</a>     | rabaptin, RAB GTPase binding e | <a href="#">Rabep2</a>             | 0.932 | -0.953 | 0.371497  | 0.64202  |
| 14058 | 10587610 | <a href="#">AK039418</a>           | <a href="#">319556</a>    | RIKEN cDNA A330041J22 gene     | <a href="#">A330041J22Rik</a>      | 0.932 | -1.402 | 0.202523  | 0.465349 |
| 14059 | 10370339 | <a href="#">NM_138301</a>          | <a href="#">28240</a>     | transient receptor potential c | <a href="#">Trpm2</a>              | 0.932 | -0.899 | 0.397819  | 0.664302 |
| 14060 | 10385822 | <a href="#">ENSMUST00000084653</a> | <a href="#">100038498</a> | predicted gene, ENSMUSG0000007 | <a href="#">ENSMUSG00000072963</a> | 0.932 | -0.735 | 0.485406  | 0.733791 |
| 14061 | 10362033 | <a href="#">XR_031343</a>          | <a href="#">100039870</a> | similar to uracil DNA glycosyl | <a href="#">LOC100039870</a>       | 0.932 | -1.09  | 0.310912  | 0.587446 |
| 14062 | 10585377 |                                    |                           |                                |                                    | 0.932 | -0.802 | 0.447965  | 0.705637 |
| 14063 | 10480829 | <a href="#">ENSMUST00000028309</a> | <a href="#">77058</a>     | RIKEN cDNA 4921530D09 gene     | <a href="#">4921530D09Rik</a>      | 0.932 | -0.929 | 0.383155  | 0.652657 |
| 14064 | 10493193 | <a href="#">NM_009836</a>          | <a href="#">12462</a>     | chaperonin subunit 3 (gamma)   | <a href="#">Cct3</a>               | 0.932 | -1.692 | 0.133219  | 0.367198 |
| 14065 | 10589761 | <a href="#">ENSMUST00000058533</a> | <a href="#">330429</a>    | lupus brain antigen 1          | <a href="#">Lbal</a>               | 0.932 | -0.667 | 0.525283  | 0.76149  |
| 14066 | 10368713 | <a href="#">RC018406</a>           | <a href="#">715970</a>    | expressed sequence A1317395    | <a href="#">A1317395</a>           | 0.932 | -0.615 | 0.557374  | 0.785582 |

|       |          |                                    |                           |                                |                                    |       |        |           |          |
|-------|----------|------------------------------------|---------------------------|--------------------------------|------------------------------------|-------|--------|-----------|----------|
| 14067 | 10467175 | <a href="#">ENSMUST00000069084</a> | <a href="#">329056</a>    | RIKEN cDNA A830019P07 gene     | <a href="#">A830019P07Rik</a>      | 0.932 | -0.517 | 0.620823  | 0.825734 |
| 14068 | 10497964 | <a href="#">ENSMUST00000058578</a> | <a href="#">70804</a>     | progesterone receptor membrane | <a href="#">Pgrmc2</a>             | 0.932 | -1.661 | 0.13932   | 0.377524 |
| 14069 | 10430681 | <a href="#">NM_175109</a>          | <a href="#">66538</a>     | ribosomal protein S19 binding  | <a href="#">Rps19bp1</a>           | 0.932 | -2.325 | 0.0519619 | 0.206172 |
| 14070 | 10430195 | <a href="#">BC129972</a>           | <a href="#">239552</a>    | apolipoprotein L 8             | <a href="#">Apol8</a>              | 0.932 | -0.564 | 0.590153  | 0.806047 |
| 14071 | 10518957 | <a href="#">NM_007859</a>          | <a href="#">13368</a>     | DNA fragmentation factor, beta | <a href="#">Dffb</a>               | 0.932 | -0.719 | 0.494732  | 0.739736 |
| 14072 | 10390919 | <a href="#">NM_001048196</a>       | <a href="#">665891</a>    | RIKEN cDNA A030010K20 gene     | <a href="#">A030010K20Rik</a>      | 0.932 | -0.364 | 0.726603  | 0.881529 |
| 14073 | 10603881 | <a href="#">NM_001013387</a>       | <a href="#">319535</a>    | zinc finger protein 182        | <a href="#">Zfp182</a>             | 0.932 | -0.684 | 0.515327  | 0.754909 |
| 14074 | 10514662 | <a href="#">ENSMUST00000097954</a> | <a href="#">100038687</a> | predicted gene, ENSMUSG0000007 | <a href="#">ENSMUSG00000073789</a> | 0.932 | -0.322 | 0.756569  | 0.897871 |
| 14075 | 10543466 | <a href="#">NM_010338</a>          | <a href="#">14763</a>     | G protein-coupled receptor 37  | <a href="#">Gpr37</a>              | 0.932 | -0.549 | 0.599477  | 0.812001 |
| 14076 | 10441862 | <a href="#">ENSMUST00000059824</a> | <a href="#">236574</a>    | sperm motility kinase 2B       | <a href="#">Smok2b</a>             | 0.932 | -0.851 | 0.422165  | 0.684371 |
| 14077 | 10539135 | <a href="#">NM_007599</a>          | <a href="#">12332</a>     | capping protein (actin filamen | <a href="#">Cappg</a>              | 0.932 | -1.184 | 0.273888  | 0.548502 |
| 14078 | 10378545 |                                    |                           |                                |                                    | 0.932 | -1.339 | 0.221093  | 0.490317 |
| 14079 | 10566791 | <a href="#">BC051019</a>           | <a href="#">57355</a>     | cDNA sequence BC051019         | <a href="#">BC051019</a>           | 0.932 | -0.742 | 0.481764  | 0.730954 |
| 14080 | 10376007 | <a href="#">NM_027917</a>          | <a href="#">71774</a>     | shroom family member 1         | <a href="#">Shroom1</a>            | 0.932 | -1.079 | 0.315381  | 0.592275 |
| 14081 | 10375242 |                                    |                           |                                |                                    | 0.932 | -0.364 | 0.726282  | 0.881516 |
| 14082 | 10400030 | <a href="#">NM_025840</a>          | <a href="#">66912</a>     | basic leucine zipper and W2 do | <a href="#">Bzw2</a>               | 0.932 | -1.068 | 0.320061  | 0.596822 |
| 14083 | 10567743 | <a href="#">NM_026330</a>          | <a href="#">67711</a>     | non-SMC element 1 homolog (S.  | <a href="#">Nsmce1</a>             | 0.932 | -1.81  | 0.111904  | 0.331062 |
| 14084 | 10460376 | <a href="#">NM_031868</a>          | <a href="#">19045</a>     | protein phosphatase 1, catalyt | <a href="#">Ppp1ca</a>             | 0.932 | -1.997 | 0.0848126 | 0.279632 |
| 14085 | 10370824 | <a href="#">NM_013595</a>          | <a href="#">17192</a>     | methyl-CpG binding domain prot | <a href="#">Mbd3</a>               | 0.932 | -1.311 | 0.229913  | 0.500912 |
| 14086 | 10444056 | <a href="#">NM_007829</a>          | <a href="#">13163</a>     | Fas death domain-associated pr | <a href="#">Daxx</a>               | 0.932 | -1.959 | 0.0897293 | 0.289125 |
| 14087 | 10391013 | <a href="#">NM_010662</a>          | <a href="#">16663</a>     | keratin 13                     | <a href="#">Krt13</a>              | 0.932 | -0.98  | 0.358724  | 0.630757 |
| 14088 | 10523977 | <a href="#">AK165889</a>           | <a href="#">100038441</a> | predicted gene, ENSMUSG0000007 | <a href="#">ENSMUSG00000072769</a> | 0.932 | -0.48  | 0.64559   | 0.840022 |
| 14089 | 10438603 | <a href="#">NM_183029</a>          | <a href="#">319765</a>    | insulin-like growth factor 2 m | <a href="#">Igf2bp2</a>            | 0.932 | -1.797 | 0.114132  | 0.335262 |
| 14090 | 10488655 | <a href="#">NM_009743</a>          | <a href="#">12048</a>     | Bcl2-like 1                    | <a href="#">Bcl2l1</a>             | 0.932 | -1.664 | 0.138753  | 0.376759 |
| 14091 | 10588201 |                                    |                           |                                |                                    | 0.932 | -0.443 | 0.670517  | 0.853752 |
| 14092 | 10499896 | <a href="#">NM_011478</a>          | <a href="#">20766</a>     | small proline-rich protein 3   | <a href="#">Sprr3</a>              | 0.932 | -0.639 | 0.542563  | 0.774975 |
| 14093 | 10424750 | <a href="#">NM_001081065</a>       | <a href="#">69020</a>     | zinc finger protein 707        | <a href="#">Zfp707</a>             | 0.932 | -1.138 | 0.291379  | 0.56746  |
| 14094 | 10489498 | <a href="#">NM_001048227</a>       | <a href="#">52840</a>     | dysbindin (dystrobrevin bindin | <a href="#">Dbnnd2</a>             | 0.932 | -0.393 | 0.705819  | 0.871814 |
| 14095 | 10474867 | <a href="#">XR_035630</a>          | <a href="#">677379</a>    | similar to ubiquinol-cytochrom | <a href="#">LOC677379</a>          | 0.932 | -0.94  | 0.377495  | 0.647352 |
| 14096 | 10445565 | <a href="#">NM_025302</a>          | <a href="#">27398</a>     | mitochondrial ribosomal protei | <a href="#">Mrpl2</a>              | 0.932 | -1.727 | 0.126511  | 0.356138 |
| 14097 | 10439989 |                                    |                           |                                |                                    | 0.932 | -0.345 | 0.739764  | 0.889275 |
| 14098 | 10438530 | <a href="#">NM_009900</a>          | <a href="#">12724</a>     | chloride channel 2             | <a href="#">Clcn2</a>              | 0.932 | -1.374 | 0.210576  | 0.476042 |
| 14099 | 10572647 | <a href="#">NM_011977</a>          | <a href="#">26457</a>     | solute carrier family 27 (fatt | <a href="#">Slc27a1</a>            | 0.932 | -1.255 | 0.248591  | 0.522089 |
| 14100 | 10370072 | <a href="#">NM_133182</a>          | <a href="#">15468</a>     | protein arginine N-methyltrans | <a href="#">Prmt2</a>              | 0.932 | -1.681 | 0.135452  | 0.371032 |
| 14101 | 10566875 | <a href="#">ENSMUST00000098110</a> | <a href="#">767812</a>    | expressed sequence AA474408    | <a href="#">AA474408</a>           | 0.932 | -1.744 | 0.123391  | 0.351473 |
| 14102 | 10541711 | <a href="#">NM_007531</a>          | <a href="#">12034</a>     | prohibitin 2                   | <a href="#">Phb2</a>               | 0.932 | -1.755 | 0.121473  | 0.347955 |
| 14103 | 10474112 | <a href="#">NM_009424</a>          | <a href="#">22034</a>     | Tnf receptor-associated factor | <a href="#">Traf6</a>              | 0.931 | -1.557 | 0.162092  | 0.410473 |
| 14104 | 10523746 | <a href="#">AK164034</a>           | <a href="#">243171</a>    | cDNA sequence BC005561         | <a href="#">BC005561</a>           | 0.931 | -0.9   | 0.397214  | 0.664239 |
| 14105 | 10539242 |                                    |                           |                                |                                    | 0.931 | -0.425 | 0.683299  | 0.859827 |
| 14106 | 10563373 | <a href="#">NM_027055</a>          | <a href="#">69363</a>     | sperm acrosome associated 4    | <a href="#">Spaca4</a>             | 0.931 | -1.152 | 0.28606   | 0.561602 |
| 14107 | 10393047 | <a href="#">NM_016905</a>          | <a href="#">14635</a>     | galactokinase 1                | <a href="#">Galk1</a>              | 0.931 | -1.642 | 0.143396  | 0.384029 |
| 14108 | 10464407 | <a href="#">XM_001480761</a>       | <a href="#">74445</a>     | RIKEN cDNA 4933412A08 gene     | <a href="#">4933412A08Rik</a>      | 0.931 | -1.462 | 0.185817  | 0.443894 |
| 14109 | 10513002 | <a href="#">XM_001476039</a>       | <a href="#">435784</a>    | similar to Rps15a protein      | <a href="#">LOC435784</a>          | 0.931 | -0.941 | 0.377108  | 0.647206 |
| 14110 | 10389164 | <a href="#">NM_134025</a>          | <a href="#">103737</a>    | peroxisomal biogenesis factor  | <a href="#">Pex12</a>              | 0.931 | -1.059 | 0.323783  | 0.600286 |
| 14111 | 10563797 | <a href="#">NM_001005232</a>       | <a href="#">13172</a>     | developing brain homeobox 1    | <a href="#">Dbx1</a>               | 0.931 | -0.761 | 0.47062   | 0.722494 |
| 14112 | 10586331 | <a href="#">NM_008988</a>          | <a href="#">19289</a>     | putative neuronal cell adhesio | <a href="#">Punc</a>               | 0.931 | -0.828 | 0.434093  | 0.694548 |
| 14113 | 10405619 | <a href="#">NM_198004</a>          | <a href="#">75731</a>     | RIKEN cDNA 5133401N09 gene     | <a href="#">5133401N09Rik</a>      | 0.931 | -2.083 | 0.0745385 | 0.258241 |
| 14114 | 10404996 | <a href="#">NM_013610</a>          | <a href="#">18081</a>     | ninjurin 1                     | <a href="#">Ninj1</a>              | 0.931 | -2.109 | 0.0717598 | 0.251634 |
| 14115 | 10511501 | <a href="#">NM_001085493</a>       | <a href="#">76947</a>     | RIKEN cDNA 2310030N02 gene     | <a href="#">2310030N02Rik</a>      | 0.931 | -0.852 | 0.42164   | 0.683993 |
| 14116 | 10560260 | <a href="#">NM_019748</a>          | <a href="#">56459</a>     | SUMO1 activating enzyme subuni | <a href="#">Sae1</a>               | 0.931 | -1.186 | 0.273126  | 0.547717 |

|       |          |                                    |                           |                                    |                               |       |        |           |          |
|-------|----------|------------------------------------|---------------------------|------------------------------------|-------------------------------|-------|--------|-----------|----------|
| 14117 | 10475293 | <a href="#">NM_153387</a>          | <a href="#">51885</a>     | tubulin, gamma complex associa     | <a href="#">Tubgcp4</a>       | 0.931 | -1.825 | 0.109564  | 0.327185 |
| 14118 | 10444858 | <a href="#">NM_146248</a>          | <a href="#">240084</a>    | coiled-coil alpha-helical rod      | <a href="#">Cchcr1</a>        | 0.931 | -1.424 | 0.196143  | 0.456495 |
| 14119 | 10405747 |                                    |                           |                                    |                               | 0.931 | -0.464 | 0.65634   | 0.846043 |
| 14120 | 10412981 | <a href="#">NM_172596</a>          | <a href="#">218811</a>    | SEC24 related gene family, mem     | <a href="#">Sec24c</a>        | 0.931 | -1.183 | 0.274331  | 0.548974 |
| 14121 | 10598309 | <a href="#">NM_019582</a>          | <a href="#">54652</a>     | calcium channel, voltage-depen     | <a href="#">Cacna1f</a>       | 0.931 | -0.414 | 0.690649  | 0.864369 |
| 14122 | 10436500 | <a href="#">NM_028803</a>          | <a href="#">74185</a>     | glucan (1,4-alpha-), branching     | <a href="#">Gbe1</a>          | 0.931 | -2.069 | 0.0761895 | 0.261455 |
| 14123 | 10398111 | <a href="#">NM_013774</a>          | <a href="#">27380</a>     | T-cell leukemia/lymphoma 1B, 4     | <a href="#">Tcl1b4</a>        | 0.931 | -0.104 | 0.920239  | 0.968133 |
| 14124 | 10566714 | <a href="#">NM_001038624</a>       | <a href="#">320360</a>    | resistance to inhibitors of ch     | <a href="#">Ric3</a>          | 0.931 | -1.373 | 0.210776  | 0.476291 |
| 14125 | 10383311 | <a href="#">ENSMUST00000070897</a> | <a href="#">76377</a>     | RIKEN cDNA 2810410L24 gene         | <a href="#">2810410L24Rik</a> | 0.931 | -1.12  | 0.298515  | 0.574741 |
| 14126 | 10372600 | <a href="#">NM_007636</a>          | <a href="#">12461</a>     | chaperonin subunit 2 (beta)        | <a href="#">Cct2</a>          | 0.931 | -1.73  | 0.125962  | 0.355325 |
| 14127 | 10386125 | <a href="#">NM_172558</a>          | <a href="#">216766</a>    | gem (nuclear organelle) associ     | <a href="#">Gemin5</a>        | 0.931 | -1.788 | 0.115683  | 0.338219 |
| 14128 | 10605143 | <a href="#">NM_138630</a>          | <a href="#">171207</a>    | Rho GTPase activating protein      | <a href="#">Arhgap4</a>       | 0.931 | -0.78  | 0.460304  | 0.71495  |
| 14129 | 10549836 | <a href="#">ENSMUST00000072947</a> | <a href="#">627821</a>    | predicted gene, EG627821           | <a href="#">EG627821</a>      | 0.931 | -1.001 | 0.349199  | 0.622762 |
| 14130 | 10504000 |                                    |                           |                                    |                               | 0.931 | -0.678 | 0.519124  | 0.757461 |
| 14131 | 10566993 | <a href="#">NM_173739</a>          | <a href="#">233733</a>    | UDP-N-acetyl-alpha-D-galactosa     | <a href="#">Galnt4</a>        | 0.931 | -0.372 | 0.720533  | 0.878348 |
| 14132 | 10483563 | <a href="#">NM_172664</a>          | <a href="#">228012</a>    | tousled-like kinase 1              | <a href="#">Tlk1</a>          | 0.931 | -1.757 | 0.121095  | 0.347578 |
| 14133 | 10493177 | <a href="#">NM_133665</a>          | <a href="#">17261</a>     | myocyte enhancer factor 2D         | <a href="#">Mef2d</a>         | 0.931 | -1.539 | 0.166442  | 0.417266 |
| 14134 | 10461583 | <a href="#">NM_009962</a>          | <a href="#">14764</a>     | G protein-coupled receptor 44      | <a href="#">Gpr44</a>         | 0.931 | -0.744 | 0.480233  | 0.729941 |
| 14135 | 10510081 | <a href="#">BC080695</a>           | <a href="#">329986</a>    | cDNA sequence BC080695             | <a href="#">BC080695</a>      | 0.931 | -0.506 | 0.628069  | 0.830847 |
| 14136 | 10432897 | <a href="#">NM_146063</a>          | <a href="#">223917</a>    | keratin 79                         | <a href="#">Krt79</a>         | 0.931 | -1.218 | 0.2616    | 0.536103 |
| 14137 | 10461143 | <a href="#">NM_001112697</a>       | <a href="#">12669</a>     | cholinergic receptor, muscarin     | <a href="#">Chrm1</a>         | 0.931 | -0.725 | 0.491215  | 0.737712 |
| 14138 | 10496888 |                                    |                           |                                    |                               | 0.931 | -0.871 | 0.411636  | 0.675585 |
| 14139 | 10410501 | <a href="#">NM_010573</a>          | <a href="#">16371</a>     | Iroquois related homeobox 1 (D     | <a href="#">Irx1</a>          | 0.931 | -1.149 | 0.28735   | 0.562985 |
| 14140 | 10410164 | <a href="#">NM_001081129</a>       | <a href="#">238680</a>    | contactin associated protein-1     | <a href="#">Cntnap3</a>       | 0.931 | -1.042 | 0.331213  | 0.60765  |
| 14141 | 10431943 | <a href="#">XR_033584</a>          | <a href="#">100046892</a> | similar to high mobility group     | <a href="#">LOC100046892</a>  | 0.931 | -0.698 | 0.50689   | 0.748755 |
| 14142 | 10351865 | <a href="#">NM_146651</a>          | <a href="#">258645</a>    | olfactory receptor 1403            | <a href="#">Olf1403</a>       | 0.931 | -1.355 | 0.216245  | 0.48343  |
| 14143 | 10546086 | <a href="#">XR_034267</a>          | <a href="#">665416</a>    | similar to Rps19 protein           | <a href="#">LOC665416</a>     | 0.931 | -2.143 | 0.0681413 | 0.243952 |
| 14144 | 10485483 | <a href="#">NM_153126</a>          | <a href="#">98956</a>     | N-acetyltransferase 10             | <a href="#">Nat10</a>         | 0.931 | -1.461 | 0.186188  | 0.44438  |
| 14145 | 10370610 | <a href="#">NM_172551</a>          | <a href="#">216151</a>    | polymerase (RNA)<br>mitochondrial  | <a href="#">Polrmt</a>        | 0.931 | -1.627 | 0.146547  | 0.388392 |
| 14146 | 10415163 | <a href="#">NM_027790</a>          | <a href="#">71412</a>     | dehydrogenase/reductase<br>member  | <a href="#">Dhrs2</a>         | 0.931 | -0.577 | 0.581286  | 0.80031  |
| 14147 | 10508486 |                                    |                           |                                    |                               | 0.931 | -0.63  | 0.548081  | 0.778543 |
| 14148 | 10579954 |                                    |                           |                                    |                               | 0.93  | -1.48  | 0.181245  | 0.437271 |
| 14149 | 10436809 | <a href="#">AF358257</a>           | <a href="#">70967</a>     | RIKEN cDNA 4931408A02<br>gene      | <a href="#">4931408A02Rik</a> | 0.93  | -1.353 | 0.217009  | 0.484575 |
| 14150 | 10579047 | <a href="#">BC127607</a>           | <a href="#">211134</a>    | leucine zipper, putative tumor     | <a href="#">Lzts1</a>         | 0.93  | -0.844 | 0.425538  | 0.687467 |
| 14151 | 10355931 | <a href="#">NM_011811</a>          | <a href="#">23874</a>     | phenylalanyl-tRNA synthetase,      | <a href="#">Farsb</a>         | 0.93  | -1.258 | 0.247587  | 0.520853 |
| 14152 | 10570178 | <a href="#">ENSMUST00000098935</a> | <a href="#">619290</a>    | RIKEN cDNA A230072I06 gene         | <a href="#">A230072I06Rik</a> | 0.93  | -1.483 | 0.180424  | 0.436136 |
| 14153 | 10420439 | <a href="#">NM_029492</a>          | <a href="#">75965</a>     | zinc finger, DHHC domain conta     | <a href="#">Zdhhc20</a>       | 0.93  | -2.201 | 0.0625176 | 0.231461 |
| 14154 | 10583444 | <a href="#">NM_146825</a>          | <a href="#">258822</a>    | olfactory receptor 39              | <a href="#">Olf39</a>         | 0.93  | -1.019 | 0.341285  | 0.616096 |
| 14155 | 10374202 | <a href="#">NM_009622</a>          | <a href="#">432530</a>    | adenylate cyclase 1                | <a href="#">Adcy1</a>         | 0.93  | -1.008 | 0.346094  | 0.620193 |
| 14156 | 10493500 | <a href="#">XM_283860</a>          | <a href="#">329702</a>    | DC-STAMP domain containing<br>2    | <a href="#">Dest2</a>         | 0.93  | -0.8   | 0.449015  | 0.706541 |
| 14157 | 10603837 | <a href="#">NM_019435</a>          | <a href="#">104130</a>    | NADH dehydrogenase<br>(ubiquinone) | <a href="#">Ndufb11</a>       | 0.93  | -1.841 | 0.106976  | 0.322599 |
| 14158 | 10509122 | <a href="#">NM_009924</a>          | <a href="#">12802</a>     | cannabinoid receptor 2 (macrop     | <a href="#">Cnr2</a>          | 0.93  | -0.522 | 0.617389  | 0.823029 |
| 14159 | 10532281 | <a href="#">NM_001104625</a>       | <a href="#">231591</a>    | vomeronal 2, receptor 14           | <a href="#">Vmn2r14</a>       | 0.93  | -0.41  | 0.693779  | 0.865705 |
| 14160 | 10485048 | <a href="#">NM_145528</a>          | <a href="#">51897</a>     | harbinger transposase derived      | <a href="#">Harbi1</a>        | 0.93  | -1.368 | 0.212451  | 0.477963 |
| 14161 | 10459208 |                                    |                           |                                    |                               | 0.93  | -0.855 | 0.41982   | 0.682087 |
| 14162 | 10478983 | <a href="#">BC049072</a>           | <a href="#">66404</a>     | RIKEN cDNA 2410001C21<br>gene      | <a href="#">2410001C21Rik</a> | 0.93  | -2.057 | 0.07755   | 0.264513 |
| 14163 | 10445237 | <a href="#">ENSMUST00000048691</a> | <a href="#">627626</a>    | similar to CG11212-PA              | <a href="#">LOC627626</a>     | 0.93  | -0.5   | 0.632084  | 0.832782 |
| 14164 | 10575369 | <a href="#">ENSMUST00000116422</a> | <a href="#">384866</a>    | gene model 1467, (NCBI)            | <a href="#">Gm1467</a>        | 0.93  | -0.811 | 0.443228  | 0.70194  |
| 14165 | 10479165 | <a href="#">NM_007903</a>          | <a href="#">13616</a>     | endothelin 3                       | <a href="#">Edn3</a>          | 0.93  | -1.03  | 0.336258  | 0.611869 |
| 14166 | 10430626 | <a href="#">NM_001013362</a>       | <a href="#">504193</a>    | neuronal pentraxin with chromo     | <a href="#">Npcd</a>          | 0.93  | -1.681 | 0.135355  | 0.370815 |
| 14167 | 10436698 | <a href="#">NM_026366</a>          | <a href="#">67768</a>     | N-6 adenine-specific DNA<br>methy  | <a href="#">N6amt1</a>        | 0.93  | -1.251 | 0.249945  | 0.524217 |

|       |          |                                    |                           |                                    |                                    |       |        |           |          |
|-------|----------|------------------------------------|---------------------------|------------------------------------|------------------------------------|-------|--------|-----------|----------|
| 14168 | 10351117 | <a href="#">ENSMUST00000086070</a> | <a href="#">100049562</a> | predicted gene,<br>ENSMUSG0000006  | <a href="#">ENSMUSG00000066752</a> | 0.93  | -0.686 | 0.514146  | 0.754507 |
| 14169 | 10363559 | <a href="#">AK016975</a>           | <a href="#">71229</a>     | RIKEN cDNA 4933428P19 gene         | <a href="#">4933428P19Rik</a>      | 0.93  | -0.63  | 0.547964  | 0.778543 |
| 14170 | 10467650 | <a href="#">NM_177603</a>          | <a href="#">212398</a>    | frequently rearranged in advan     | <a href="#">Frat2</a>              | 0.93  | -1.476 | 0.182306  | 0.438828 |
| 14171 | 10368689 |                                    |                           |                                    |                                    | 0.93  | -2.081 | 0.0747473 | 0.258738 |
| 14172 | 10465701 | <a href="#">NM_019516</a>          | <a href="#">56072</a>     | lectin, galactose binding, sol     | <a href="#">Lgals12</a>            | 0.93  | -1.389 | 0.206118  | 0.470186 |
| 14173 | 10412251 | <a href="#">NM_010887</a>          | <a href="#">17993</a>     | NADH dehydrogenase<br>(ubiquinone) | <a href="#">Ndufs4</a>             | 0.93  | -1.712 | 0.129396  | 0.360656 |
| 14174 | 10598448 | <a href="#">NM_008423</a>          | <a href="#">16506</a>     | potassium voltage-gated channe     | <a href="#">Kcnd1</a>              | 0.93  | -0.49  | 0.638672  | 0.835923 |
| 14175 | 10576218 | <a href="#">NM_170684</a>          | <a href="#">102278</a>    | copine VII                         | <a href="#">Cpne7</a>              | 0.93  | -0.918 | 0.388483  | 0.657074 |
| 14176 | 10359113 | <a href="#">BC116972</a>           | <a href="#">329274</a>    | RIKEN cDNA A230106N23<br>gene      | <a href="#">A230106N23Rik</a>      | 0.93  | -0.679 | 0.518153  | 0.756879 |
| 14177 | 10582322 | <a href="#">NM_013914</a>          | <a href="#">30927</a>     | snail homolog 3 (Drosophila)       | <a href="#">Snai3</a>              | 0.93  | -0.964 | 0.366039  | 0.63705  |
| 14178 | 10604669 |                                    |                           |                                    |                                    | 0.93  | -0.931 | 0.381814  | 0.651436 |
| 14179 | 10567663 | <a href="#">NM_001081238</a>       | <a href="#">233826</a>    | partner and localizer of BRCA2     | <a href="#">Palb2</a>              | 0.93  | -1.273 | 0.242634  | 0.515498 |
| 14180 | 10384577 |                                    |                           |                                    |                                    | 0.93  | -0.443 | 0.670761  | 0.85389  |
| 14181 | 10509927 | <a href="#">AK132662</a>           | <a href="#">100038750</a> | predicted gene,<br>ENSMUSG0000007  | <a href="#">ENSMUSG00000073734</a> | 0.93  | -1.712 | 0.129376  | 0.36065  |
| 14182 | 10447429 | <a href="#">XM_140116</a>          | <a href="#">225058</a>    | predicted gene, EG225058           | <a href="#">EG225058</a>           | 0.93  | -1.223 | 0.259882  | 0.53415  |
| 14183 | 10550451 |                                    |                           |                                    |                                    | 0.93  | -1.005 | 0.347558  | 0.621575 |
| 14184 | 10457203 |                                    |                           |                                    |                                    | 0.93  | -0.838 | 0.428953  | 0.689875 |
| 14185 | 10493537 | <a href="#">NM_146131</a>          | <a href="#">229534</a>    | pre-B-cell leukemia transcript     | <a href="#">Pbxip1</a>             | 0.93  | -0.775 | 0.463144  | 0.71752  |
| 14186 | 10396919 | <a href="#">BC040401</a>           | <a href="#">217684</a>    | RIKEN cDNA 4933426M11<br>gene      | <a href="#">4933426M11Rik</a>      | 0.93  | -1.239 | 0.254265  | 0.528527 |
| 14187 | 10565846 | <a href="#">NM_025668</a>          | <a href="#">66624</a>     | signal peptidase complex subun     | <a href="#">Spcs2</a>              | 0.93  | -1.636 | 0.144653  | 0.38594  |
| 14188 | 10455299 | <a href="#">NM_172966</a>          | <a href="#">269016</a>    | SH3 domain containing ring fin     | <a href="#">Sh3rf2</a>             | 0.93  | -0.823 | 0.43687   | 0.696333 |
| 14189 | 10348866 | <a href="#">NM_174874</a>          | <a href="#">66615</a>     | autophagy-related 4B (yeast)       | <a href="#">Atg4b</a>              | 0.93  | -1.244 | 0.252428  | 0.526583 |
| 14190 | 10449142 | <a href="#">BC024332</a>           | <a href="#">68241</a>     | RIKEN cDNA 9530058B02<br>gene      | <a href="#">9530058B02Rik</a>      | 0.93  | -1.169 | 0.279728  | 0.554993 |
| 14191 | 10501454 |                                    |                           |                                    |                                    | 0.93  | -0.993 | 0.35286   | 0.625927 |
| 14192 | 10466073 | <a href="#">ENSMUST00000099686</a> | <a href="#">100038352</a> | predicted gene,<br>ENSMUSG0000007  | <a href="#">ENSMUSG00000075017</a> | 0.93  | -0.978 | 0.359548  | 0.63155  |
| 14193 | 10464363 | <a href="#">ENSMUST00000026083</a> | <a href="#">75800</a>     | RIKEN cDNA 4930442E04 gene         | <a href="#">4930442E04Rik</a>      | 0.93  | -0.548 | 0.600062  | 0.812117 |
| 14194 | 10562963 | <a href="#">AK141792</a>           | <a href="#">52819</a>     | DNA segment, Chr 7, Brigham<br>&   | <a href="#">D7Bwg0826e</a>         | 0.93  | -1.547 | 0.164482  | 0.414282 |
| 14195 | 10549679 | <a href="#">NM_001003920</a>       | <a href="#">381979</a>    | BR serine/threonine kinase 1       | <a href="#">Brsk1</a>              | 0.93  | -1.104 | 0.305107  | 0.581502 |
| 14196 | 10457333 | <a href="#">NM_001081393</a>       | <a href="#">74934</a>     | armadillo repeat containing 4      | <a href="#">Armc4</a>              | 0.93  | -0.891 | 0.401487  | 0.666803 |
| 14197 | 10382010 | <a href="#">NM_027946</a>          | <a href="#">71833</a>     | WD repeat domain 68                | <a href="#">Wdr68</a>              | 0.93  | -1.814 | 0.111251  | 0.330054 |
| 14198 | 10347730 |                                    |                           |                                    |                                    | 0.93  | -0.409 | 0.694153  | 0.865705 |
| 14199 | 10376747 | <a href="#">NM_010603</a>          | <a href="#">16515</a>     | potassium inwardly-rectifying      | <a href="#">Kcnj12</a>             | 0.93  | -1.217 | 0.261881  | 0.536313 |
| 14200 | 10485536 |                                    |                           |                                    |                                    | 0.93  | -0.859 | 0.418012  | 0.680624 |
| 14201 | 10454512 | <a href="#">AK160455</a>           | <a href="#">100049078</a> | RIKEN cDNA 1810036N14<br>gene      | <a href="#">1810036N14Rik</a>      | 0.93  | -0.9   | 0.397013  | 0.664239 |
| 14202 | 10390979 | <a href="#">NM_010659</a>          | <a href="#">16660</a>     | keratin 31                         | <a href="#">Krt31</a>              | 0.93  | -0.992 | 0.353319  | 0.626044 |
| 14203 | 10596652 | <a href="#">NM_133984</a>          | <a href="#">69536</a>     | HemK methyltransferase family      | <a href="#">Hemk1</a>              | 0.929 | -1.159 | 0.283568  | 0.558889 |
| 14204 | 10409322 | <a href="#">NM_028597</a>          | <a href="#">73666</a>     | THO complex 3                      | <a href="#">Thoc3</a>              | 0.929 | -1.872 | 0.102147  | 0.313496 |
| 14205 | 10533327 | <a href="#">NM_010765</a>          | <a href="#">17165</a>     | MAP kinase-activated protein k     | <a href="#">Mapkapk5</a>           | 0.929 | -2.158 | 0.0666474 | 0.241189 |
| 14206 | 10359082 |                                    |                           |                                    |                                    | 0.929 | -1.532 | 0.168249  | 0.419709 |
| 14207 | 10442565 | <a href="#">NM_027988</a>          | <a href="#">71893</a>     | NADPH oxidase organizer 1          | <a href="#">Noxo1</a>              | 0.929 | -1.408 | 0.200628  | 0.462553 |
| 14208 | 10489078 | <a href="#">NM_025853</a>          | <a href="#">66934</a>     | DSN1, MIND kinetochore<br>complex  | <a href="#">Dsn1</a>               | 0.929 | -1.048 | 0.328557  | 0.604982 |
| 14209 | 10460554 | <a href="#">ENSMUST00000099983</a> | <a href="#">321016</a>    | predicted gene,<br>ENSMUSG0000007  | <a href="#">ENSMUSG00000075264</a> | 0.929 | -0.626 | 0.550428  | 0.780695 |
| 14210 | 10410148 | <a href="#">NM_001081129</a>       | <a href="#">238680</a>    | contactin associated protein-1     | <a href="#">Cntnap3</a>            | 0.929 | -0.756 | 0.473808  | 0.725379 |
| 14211 | 10450864 | <a href="#">NM_146513</a>          | <a href="#">258506</a>    | olfactory receptor 95              | <a href="#">Olfir95</a>            | 0.929 | -0.269 | 0.795535  | 0.916955 |
| 14212 | 10436947 | <a href="#">NM_134110</a>          | <a href="#">246133</a>    | potassium voltage-gated channe     | <a href="#">Kcne2</a>              | 0.929 | -0.55  | 0.599117  | 0.811784 |
| 14213 | 10448048 | <a href="#">NM_011185</a>          | <a href="#">19170</a>     | proteasome (prosome, macropain     | <a href="#">Psmbl1</a>             | 0.929 | -1.455 | 0.187874  | 0.446188 |
| 14214 | 10416400 |                                    |                           |                                    |                                    | 0.929 | -0.468 | 0.653536  | 0.844695 |
| 14215 | 10560237 | <a href="#">NM_176912</a>          | <a href="#">319430</a>    | G protein-coupled receptor 77      | <a href="#">Gpr77</a>              | 0.929 | -1.13  | 0.294778  | 0.571103 |
| 14216 | 10501492 | <a href="#">NM_016670</a>          | <a href="#">50868</a>     | krab like ECU associated prot      | <a href="#">Kcap1</a>              | 0.929 | -1.427 | 0.10252   | 0.452044 |

|       |          |                                    |                           |                                 |                                    |       |        |           |          |
|-------|----------|------------------------------------|---------------------------|---------------------------------|------------------------------------|-------|--------|-----------|----------|
| 14210 | 10591482 | <a href="#">NM_010072</a>          | <a href="#">30600</a>     | keirin-like ECF-associated prot | <a href="#">Neap1</a>              | 0.929 | -1.457 | 0.19252   | 0.432044 |
| 14217 | 10426157 | <a href="#">NM_026485</a>          | <a href="#">67976</a>     | TraB domain containing          | <a href="#">Trabd</a>              | 0.929 | -1.341 | 0.220574  | 0.489486 |
| 14218 | 10474809 | <a href="#">BC031454</a>           | <a href="#">53906</a>     | RIKEN cDNA 1810007E14 gene      | <a href="#">1810007E14Rik</a>      | 0.929 | -0.102 | 0.921474  | 0.968661 |
| 14219 | 10505978 |                                    |                           |                                 |                                    | 0.929 | -0.835 | 0.430769  | 0.691428 |
| 14220 | 10543448 | <a href="#">NM_028459</a>          | <a href="#">73178</a>     | Wiskott-Aldrich syndrome-like   | <a href="#">Wasl</a>               | 0.929 | -1.37  | 0.211938  | 0.477389 |
| 14221 | 10470186 | <a href="#">NM_001099301</a>       | <a href="#">383678</a>    | novel lipocalin protein         | <a href="#">RP23-225D24.3</a>      | 0.929 | -0.762 | 0.470519  | 0.722494 |
| 14222 | 10356601 | <a href="#">NM_011066</a>          | <a href="#">18627</a>     | period homolog 2 (Drosophila)   | <a href="#">Per2</a>               | 0.929 | -1.5   | 0.176165  | 0.429929 |
| 14223 | 10546775 | <a href="#">NM_021449</a>          | <a href="#">58799</a>     | cereblon                        | <a href="#">Crbn</a>               | 0.929 | -2.062 | 0.0769492 | 0.263058 |
| 14224 | 10441359 |                                    |                           |                                 |                                    | 0.929 | -1.202 | 0.267201  | 0.541834 |
| 14225 | 10393125 | <a href="#">NM_024177</a>          | <a href="#">60441</a>     | mitochondrial ribosomal protei  | <a href="#">Mrpl38</a>             | 0.929 | -1.88  | 0.100952  | 0.311019 |
| 14226 | 10394119 | <a href="#">NM_178763</a>          | <a href="#">319530</a>    | zinc finger protein 750         | <a href="#">Zfp750</a>             | 0.929 | -1.232 | 0.256587  | 0.530797 |
| 14227 | 10473814 | <a href="#">NM_008653</a>          | <a href="#">17868</a>     | myosin binding protein C, card  | <a href="#">Mybpc3</a>             | 0.929 | -0.695 | 0.508786  | 0.750513 |
| 14228 | 10406538 |                                    |                           |                                 |                                    | 0.929 | -1.054 | 0.326048  | 0.602461 |
| 14229 | 10528691 | <a href="#">NM_053075</a>          | <a href="#">19744</a>     | RAS-homolog enriched in brain   | <a href="#">Rheb</a>               | 0.929 | -1.515 | 0.172397  | 0.42462  |
| 14230 | 10494299 | <a href="#">NM_019561</a>          | <a href="#">56205</a>     | endosulfine alpha               | <a href="#">Ensa</a>               | 0.929 | -1.597 | 0.153108  | 0.397119 |
| 14231 | 10499652 | <a href="#">ENSMUST00000038450</a> | <a href="#">74034</a>     | RIKEN cDNA 4632404H12 gene      | <a href="#">4632404H12Rik</a>      | 0.929 | -0.651 | 0.535177  | 0.768839 |
| 14232 | 10470736 | <a href="#">ENSMUST00000113808</a> | <a href="#">433416</a>    | predicted gene, OTTMUSG0000001  | <a href="#">OTTMUSG0000012686</a>  | 0.929 | -0.564 | 0.58992   | 0.805977 |
| 14233 | 10532584 | <a href="#">XM_912851</a>          | <a href="#">74376</a>     | myosin XVIIIb                   | <a href="#">Myo18b</a>             | 0.929 | -0.616 | 0.55669   | 0.78513  |
| 14234 | 10492679 | <a href="#">BC052483</a>           | <a href="#">75939</a>     | RIKEN cDNA 4930579G24 gene      | <a href="#">4930579G24Rik</a>      | 0.929 | -1.069 | 0.319546  | 0.596487 |
| 14235 | 10399768 | <a href="#">NM_178811</a>          | <a href="#">217449</a>    | tetratricopeptide repeat domai  | <a href="#">Ttc15</a>              | 0.929 | -1.442 | 0.191202  | 0.450375 |
| 14236 | 10445016 |                                    |                           |                                 |                                    | 0.929 | -1.092 | 0.309933  | 0.586734 |
| 14237 | 10427290 | <a href="#">NM_010466</a>          | <a href="#">15426</a>     | homeo box C8                    | <a href="#">Hoxc8</a>              | 0.929 | -0.586 | 0.575456  | 0.797076 |
| 14238 | 10528287 | <a href="#">ENSMUST00000116156</a> | <a href="#">626903</a>    | predicted gene, EG626903        | <a href="#">EG626903</a>           | 0.929 | -1.221 | 0.260428  | 0.53495  |
| 14239 | 10474437 | <a href="#">NM_026613</a>          | <a href="#">68201</a>     | coiled-coil domain containing   | <a href="#">Ccdc34</a>             | 0.929 | -1.792 | 0.115035  | 0.337303 |
| 14240 | 10386652 | <a href="#">NM_007437</a>          | <a href="#">11671</a>     | aldehyde dehydrogenase family   | <a href="#">Aldh3a2</a>            | 0.929 | -1.207 | 0.265599  | 0.540607 |
| 14241 | 10455809 | <a href="#">BC099538</a>           | <a href="#">67343</a>     | RIKEN cDNA 1700065I17 gene      | <a href="#">1700065I17Rik</a>      | 0.929 | -1.923 | 0.0946526 | 0.298885 |
| 14242 | 10517147 | <a href="#">NM_026144</a>          | <a href="#">67422</a>     | dehydrodolichyl diphosphate sy  | <a href="#">Dhdds</a>              | 0.929 | -1.331 | 0.223598  | 0.493567 |
| 14243 | 10367100 | <a href="#">NM_019766</a>          | <a href="#">56351</a>     | prostaglandin E synthase 3 (cy  | <a href="#">Ptges3</a>             | 0.929 | -1.32  | 0.22723   | 0.498001 |
| 14244 | 10427308 | <a href="#">ENSMUST00000100163</a> | <a href="#">100038520</a> | predicted gene, ENSMUSG0000007  | <a href="#">ENSMUSG00000075393</a> | 0.929 | -0.789 | 0.45507   | 0.711341 |
| 14245 | 10569303 |                                    |                           |                                 |                                    | 0.929 | -0.255 | 0.805866  | 0.921687 |
| 14246 | 10393628 | <a href="#">NM_172443</a>          | <a href="#">207592</a>    | TBC1 domain family, member 16   | <a href="#">Tbc1d16</a>            | 0.929 | -1.296 | 0.234964  | 0.506303 |
| 14247 | 10480258 | <a href="#">NM_028950</a>          | <a href="#">74455</a>     | NOL1/NOP2/Sun domain family 6   | <a href="#">Nsun6</a>              | 0.929 | -1.118 | 0.299504  | 0.575641 |
| 14248 | 10515461 | <a href="#">BC058415</a>           | <a href="#">66743</a>     | RIKEN cDNA 4931406I20 gene      | <a href="#">4931406I20Rik</a>      | 0.929 | -1.944 | 0.0917967 | 0.293549 |
| 14249 | 10533071 | <a href="#">NM_178622</a>          | <a href="#">71954</a>     | suppressor of defective silenc  | <a href="#">Suds3</a>              | 0.929 | -1.973 | 0.0878562 | 0.285438 |
| 14250 | 10423134 | <a href="#">NM_011767</a>          | <a href="#">22763</a>     | zinc finger RNA binding protei  | <a href="#">Zfr</a>                | 0.929 | -1.705 | 0.130682  | 0.362855 |
| 14251 | 10511446 | <a href="#">NM_023066</a>          | <a href="#">65973</a>     | aspartate-beta-hydroxylase      | <a href="#">Asph</a>               | 0.929 | -1.491 | 0.178383  | 0.433134 |
| 14252 | 10550161 | <a href="#">XR_033718</a>          | <a href="#">666256</a>    | predicted gene, EG666256        | <a href="#">EG666256</a>           | 0.929 | -1.091 | 0.310496  | 0.587103 |
| 14253 | 10511721 |                                    |                           |                                 |                                    | 0.929 | -0.694 | 0.509134  | 0.750516 |
| 14254 | 10437263 | <a href="#">NM_028484</a>          | <a href="#">73261</a>     | RIKEN cDNA 1700037C18 gene      | <a href="#">1700037C18Rik</a>      | 0.929 | -1.288 | 0.237625  | 0.510033 |
| 14255 | 10356848 | <a href="#">NM_025920</a>          | <a href="#">67026</a>     | THAP domain containing 4        | <a href="#">Thap4</a>              | 0.929 | -1.428 | 0.195099  | 0.455317 |
| 14256 | 10359861 | <a href="#">NM_025569</a>          | <a href="#">66447</a>     | microsomal glutathione S-trans  | <a href="#">Mgst3</a>              | 0.929 | -0.747 | 0.478724  | 0.729103 |
| 14257 | 10355105 | <a href="#">AF362573</a>           | <a href="#">100126881</a> | predicted gene, ENSMUSG0000004  | <a href="#">ENSMUSG00000040847</a> | 0.929 | -1.429 | 0.194731  | 0.454775 |
| 14258 | 10368806 | <a href="#">NM_009213</a>          | <a href="#">20598</a>     | sphingomyelin phosphodiesteras  | <a href="#">Smpd2</a>              | 0.929 | -2.357 | 0.0495504 | 0.200094 |
| 14259 | 10355730 | <a href="#">BC028815</a>           | <a href="#">69171</a>     | RIKEN cDNA 1810031K17 gene      | <a href="#">1810031K17Rik</a>      | 0.929 | -1.835 | 0.107897  | 0.323967 |
| 14260 | 10443869 | <a href="#">NM_024442</a>          | <a href="#">70101</a>     | cytochrome P450, family 4, sub  | <a href="#">Cyp4f16</a>            | 0.929 | -0.598 | 0.568013  | 0.793164 |
| 14261 | 10593872 | <a href="#">NM_198673</a>          | <a href="#">382075</a>    | outer dense fiber of sperm tai  | <a href="#">Odf311</a>             | 0.929 | -1.309 | 0.230555  | 0.501476 |
| 14262 | 10400630 |                                    |                           |                                 |                                    | 0.929 | -0.962 | 0.367209  | 0.638141 |
| 14263 | 10443301 | <a href="#">NM_172617</a>          | <a href="#">224656</a>    | zinc finger protein 523         | <a href="#">Zfp523</a>             | 0.929 | -1.307 | 0.231237  | 0.501993 |
| 14264 | 10579101 | <a href="#">NM_026818</a>          | <a href="#">68709</a>     | cartilage intermediate layer p  | <a href="#">Cilp2</a>              | 0.929 | -1.103 | 0.305368  | 0.581741 |
| 14265 | 10379030 | <a href="#">NM_145430</a>          | <a href="#">216971</a>    | cDNA sequence BC017647          | <a href="#">BC017647</a>           | 0.929 | -1.683 | 0.134896  | 0.370228 |

|       |          |                                    |                           |                                |                                    |       |        |           |          |
|-------|----------|------------------------------------|---------------------------|--------------------------------|------------------------------------|-------|--------|-----------|----------|
| 14266 | 10572605 | <a href="#">BC145659</a>           | <a href="#">234396</a>    | ankyrin repeat and LEM domain  | <a href="#">Ankle1</a>             | 0.929 | -1.292 | 0.236162  | 0.508287 |
| 14267 | 10567903 | <a href="#">NM_011363</a>          | <a href="#">20399</a>     | SH2B adaptor protein 1         | <a href="#">Sh2b1</a>              | 0.929 | -1.923 | 0.0946885 | 0.298946 |
| 14268 | 10434880 | <a href="#">NM_013751</a>          | <a href="#">27281</a>     | HRAS-like suppressor           | <a href="#">Hrasls</a>             | 0.929 | -0.915 | 0.389933  | 0.658612 |
| 14269 | 10498485 | <a href="#">NM_015728</a>          | <a href="#">11416</a>     | solute carrier family 33 (acet | <a href="#">Slc33a1</a>            | 0.929 | -1.213 | 0.263539  | 0.53828  |
| 14270 | 10442779 | <a href="#">NM_053260</a>          | <a href="#">114662</a>    | protease, serine, 29           | <a href="#">Prss29</a>             | 0.929 | -0.776 | 0.462166  | 0.71674  |
| 14271 | 10585652 | <a href="#">NM_028636</a>          | <a href="#">73744</a>     | mannosidase, alpha, class 2C,  | <a href="#">Man2c1</a>             | 0.929 | -1.562 | 0.161033  | 0.408897 |
| 14272 | 10376216 | <a href="#">NM_153139</a>          | <a href="#">215335</a>    | solute carrier family 36 (prot | <a href="#">Slc36a1</a>            | 0.929 | -0.669 | 0.524376  | 0.760916 |
| 14273 | 10494769 | <a href="#">NM_194343</a>          | <a href="#">229644</a>    | tripartite motif-containing 45 | <a href="#">Trim45</a>             | 0.929 | -1.021 | 0.340426  | 0.61558  |
| 14274 | 10486112 | <a href="#">NM_138313</a>          | <a href="#">171543</a>    | Bcl2 modifying factor          | <a href="#">Bmf</a>                | 0.929 | -1.839 | 0.107265  | 0.322736 |
| 14275 | 10497250 |                                    |                           |                                |                                    | 0.928 | -0.351 | 0.735789  | 0.886874 |
| 14276 | 10391513 | <a href="#">NM_028207</a>          | <a href="#">72349</a>     | dual specificity phosphatase 3 | <a href="#">Dusp3</a>              | 0.928 | -0.96  | 0.367954  | 0.638955 |
| 14277 | 10476133 | <a href="#">BC049728</a>           | <a href="#">66766</a>     | RIKEN cDNA 4933425O20 gene     | <a href="#">4933425O20Rik</a>      | 0.928 | -0.195 | 0.851125  | 0.94011  |
| 14278 | 10584401 | <a href="#">NM_207552</a>          | <a href="#">404312</a>    | olfactory receptor 250         | <a href="#">Olf250</a>             | 0.928 | -0.408 | 0.694986  | 0.866071 |
| 14279 | 10555725 | <a href="#">NM_147102</a>          | <a href="#">259106</a>    | olfactory receptor 552         | <a href="#">Olf552</a>             | 0.928 | -0.566 | 0.588397  | 0.805111 |
| 14280 | 10488959 | <a href="#">ENSMUST00000109617</a> | <a href="#">320095</a>    | RIKEN cDNA 6430550D23 gene     | <a href="#">6430550D23Rik</a>      | 0.928 | -0.638 | 0.543155  | 0.775611 |
| 14281 | 10400605 | <a href="#">ENSMUST00000081908</a> | <a href="#">238217</a>    | predicted gene, EG238217       | <a href="#">EG238217</a>           | 0.928 | -0.375 | 0.718528  | 0.877128 |
| 14282 | 10393408 | <a href="#">NM_145439</a>          | <a href="#">217353</a>    | transmembrane channel-like gen | <a href="#">Tmc6</a>               | 0.928 | -1.458 | 0.186913  | 0.445182 |
| 14283 | 10395910 | <a href="#">NM_008891</a>          | <a href="#">18949</a>     | pinin                          | <a href="#">Pnn</a>                | 0.928 | -1.556 | 0.162499  | 0.411049 |
| 14284 | 10395287 | <a href="#">NM_001033436</a>       | <a href="#">380753</a>    | ataxin 7-like 1                | <a href="#">Atxn7l1</a>            | 0.928 | -1.515 | 0.172272  | 0.424438 |
| 14285 | 10384778 |                                    |                           |                                |                                    | 0.928 | -0.369 | 0.722761  | 0.87962  |
| 14286 | 10350806 | <a href="#">NM_130456</a>          | <a href="#">170484</a>    | nephrosis 2 homolog, podocin ( | <a href="#">Nphs2</a>              | 0.928 | -0.891 | 0.401569  | 0.666842 |
| 14287 | 10526966 |                                    |                           |                                |                                    | 0.928 | -0.64  | 0.541991  | 0.774466 |
| 14288 | 10423346 | <a href="#">NM_144523</a>          | <a href="#">52521</a>     | zinc finger protein 622        | <a href="#">Zfp622</a>             | 0.928 | -1.938 | 0.0926395 | 0.294729 |
| 14289 | 10470768 | <a href="#">NM_026615</a>          | <a href="#">68205</a>     | ubiquitin related modifier 1 h | <a href="#">Urm1</a>               | 0.928 | -1.196 | 0.269692  | 0.544449 |
| 14290 | 10603620 | <a href="#">ENSMUST00000101687</a> | <a href="#">100038758</a> | predicted gene, ENSMUSG0000007 | <a href="#">ENSMUSG00000073288</a> | 0.928 | -0.909 | 0.392664  | 0.660631 |
| 14291 | 10425299 | <a href="#">NM_172609</a>          | <a href="#">223696</a>    | translocase of outer mitochond | <a href="#">Tomm22</a>             | 0.928 | -1.559 | 0.161734  | 0.410008 |
| 14292 | 10444291 | <a href="#">NM_207105</a>          | <a href="#">14961</a>     | histocompatibility 2, class II | <a href="#">H2-Ab1</a>             | 0.928 | -0.559 | 0.593311  | 0.807893 |
| 14293 | 10408367 | <a href="#">NM_008232</a>          | <a href="#">15192</a>     | hepatoma derived growth factor | <a href="#">Hdgfl1</a>             | 0.928 | -0.797 | 0.450923  | 0.708135 |
| 14294 | 10469320 | <a href="#">ENSMUST00000064229</a> | <a href="#">791315</a>    | predicted gene, ENSMUSG0000005 | <a href="#">ENSMUSG00000052389</a> | 0.928 | -0.843 | 0.426345  | 0.687967 |
| 14295 | 10590791 | <a href="#">NM_007465</a>          | <a href="#">11797</a>     | baculoviral IAP repeat-contain | <a href="#">Birc2</a>              | 0.928 | -1.696 | 0.132392  | 0.365778 |
| 14296 | 10347672 | <a href="#">NM_027886</a>          | <a href="#">71728</a>     | serine/threonine kinase 11 int | <a href="#">Stk11ip</a>            | 0.928 | -1.032 | 0.335436  | 0.61105  |
| 14297 | 10554468 |                                    |                           |                                |                                    | 0.928 | -0.495 | 0.63543   | 0.834401 |
| 14298 | 10390909 | <a href="#">NM_029351</a>          | <a href="#">75586</a>     | RIKEN cDNA 2310040M23 gene     | <a href="#">2310040M23Rik</a>      | 0.928 | -0.674 | 0.52155   | 0.758801 |
| 14299 | 10485013 | <a href="#">BC085239</a>           | <a href="#">228356</a>    | RIKEN cDNA 1110051M20 gene     | <a href="#">1110051M20Rik</a>      | 0.928 | -1.439 | 0.192172  | 0.451484 |
| 14300 | 10357249 | <a href="#">NM_001085409</a>       | <a href="#">68428</a>     | STEAP family member 3          | <a href="#">Steap3</a>             | 0.928 | -1.019 | 0.341065  | 0.615941 |
| 14301 | 10412231 | <a href="#">NM_019960</a>          | <a href="#">56534</a>     | heat shock protein 3           | <a href="#">Hspb3</a>              | 0.928 | -0.936 | 0.379479  | 0.649272 |
| 14302 | 10591608 | <a href="#">NM_177030</a>          | <a href="#">319899</a>    | dedicator of cytokinesis 6     | <a href="#">Dock6</a>              | 0.928 | -1.726 | 0.126711  | 0.356607 |
| 14303 | 10528721 | <a href="#">ENSMUST00000066954</a> | <a href="#">77870</a>     | RIKEN cDNA E130116L18 gene     | <a href="#">E130116L18Rik</a>      | 0.928 | -0.87  | 0.412363  | 0.676163 |
| 14304 | 10413163 | <a href="#">NM_001033214</a>       | <a href="#">105418</a>    | RIKEN cDNA E330034G19 gene     | <a href="#">E330034G19Rik</a>      | 0.928 | -1.382 | 0.208244  | 0.472843 |
| 14305 | 10583347 | <a href="#">NM_025844</a>          | <a href="#">66917</a>     | cysteine and histidine-rich do | <a href="#">Chordc1</a>            | 0.928 | -1.487 | 0.179489  | 0.434871 |
| 14306 | 10599997 | <a href="#">NM_016985</a>          | <a href="#">53332</a>     | myotubularin related protein 1 | <a href="#">Mtmr1</a>              | 0.928 | -1.758 | 0.120918  | 0.347273 |
| 14307 | 10433735 | <a href="#">NM_008576</a>          | <a href="#">17250</a>     | ATP-binding cassette, sub-fami | <a href="#">Abcc1</a>              | 0.928 | -0.841 | 0.427243  | 0.688539 |
| 14308 | 10393818 | <a href="#">NM_026814</a>          | <a href="#">68701</a>     | dysferlin interacting protein  | <a href="#">Dysfip1</a>            | 0.928 | -0.941 | 0.377351  | 0.647352 |
| 14309 | 10422396 | <a href="#">NM_145465</a>          | <a href="#">223255</a>    | serine/threonine kinase 24 (ST | <a href="#">Stk24</a>              | 0.928 | -1.421 | 0.196989  | 0.457727 |
| 14310 | 10513082 | <a href="#">NM_175518</a>          | <a href="#">242474</a>    | RIKEN cDNA D730040F13 gene     | <a href="#">D730040F13Rik</a>      | 0.928 | -1.193 | 0.270542  | 0.545253 |
| 14311 | 10504470 | <a href="#">NM_010790</a>          | <a href="#">17279</a>     | maternal embryonic leucine zip | <a href="#">Melk</a>               | 0.928 | -1.486 | 0.179663  | 0.434993 |
| 14312 | 10462088 | <a href="#">ENSMUST00000058189</a> | <a href="#">68248</a>     | RIKEN cDNA 2410080I02 gene     | <a href="#">2410080I02Rik</a>      | 0.928 | -0.803 | 0.447568  | 0.705227 |
| 14313 | 10364683 | <a href="#">NM_011492</a>          | <a href="#">20869</a>     | serine/threonine kinase 11     | <a href="#">Stk11</a>              | 0.928 | -1.51  | 0.173422  | 0.426129 |
| 14314 | 10439642 | <a href="#">NM_028756</a>          | <a href="#">74102</a>     | solute carrier family 35, memb | <a href="#">Slc35a5</a>            | 0.928 | -1.059 | 0.323817  | 0.600286 |
| 14315 | 10353343 | <a href="#">XM_001476278</a>       | <a href="#">100046479</a> | similar to Ac2-210             | <a href="#">LOC100046479</a>       | 0.928 | -1.196 | 0.269683  | 0.544449 |

|       |          |                                    |                           |                                |                               |       |        |           |          |
|-------|----------|------------------------------------|---------------------------|--------------------------------|-------------------------------|-------|--------|-----------|----------|
| 14316 | 10593159 | <a href="#">NM_008775</a>          | <a href="#">18475</a>     | platelet-activating factor ace | <a href="#">Pafah1b2</a>      | 0.928 | -1.694 | 0.132821  | 0.366483 |
| 14317 | 10529239 | <a href="#">NM_177298</a>          | <a href="#">320951</a>    | phosphatidylserine decarboxyla | <a href="#">Pisd</a>          | 0.928 | -1.616 | 0.148819  | 0.391099 |
| 14318 | 10517639 | <a href="#">NM_178671</a>          | <a href="#">212190</a>    | UBX domain containing 3        | <a href="#">Ubx3</a>          | 0.928 | -0.752 | 0.475926  | 0.727266 |
| 14319 | 10605919 | <a href="#">NM_001083110</a>       | <a href="#">18744</a>     | praja1, RING-H2 motif containi | <a href="#">Pja1</a>          | 0.928 | -1.38  | 0.208922  | 0.473969 |
| 14320 | 10590323 | <a href="#">ENSMUST00000064646</a> | <a href="#">76100</a>     | RIKEN cDNA 5830454E08 gene     | <a href="#">5830454E08Rik</a> | 0.928 | -0.746 | 0.479185  | 0.729179 |
| 14321 | 10422854 | <a href="#">NM_133227</a>          | <a href="#">170762</a>    | nucleoporin 155                | <a href="#">Nup155</a>        | 0.928 | -1.611 | 0.150038  | 0.393062 |
| 14322 | 10405483 | <a href="#">NM_001030296</a>       | <a href="#">432763</a>    | proline rich 7 (synaptic)      | <a href="#">Prr7</a>          | 0.928 | -0.643 | 0.540076  | 0.772571 |
| 14323 | 10602178 | <a href="#">XM_001474727</a>       | <a href="#">100045676</a> | similar to 40S ribosomal prote | <a href="#">LOC100045676</a>  | 0.928 | -1.508 | 0.174089  | 0.427073 |
| 14324 | 10583056 | <a href="#">NM_008605</a>          | <a href="#">17381</a>     | matrix metalloproteinase 12    | <a href="#">Mmp12</a>         | 0.928 | -1.149 | 0.28713   | 0.562971 |
| 14325 | 10540897 | <a href="#">NM_011146</a>          | <a href="#">19016</a>     | peroxisome proliferator activa | <a href="#">Pparg</a>         | 0.928 | -1.122 | 0.297766  | 0.573822 |
| 14326 | 10563657 |                                    |                           |                                |                               | 0.928 | -0.781 | 0.459778  | 0.71461  |
| 14327 | 10432734 | <a href="#">BC118024</a>           | <a href="#">239673</a>    | RIKEN cDNA 4732456N10 gene     | <a href="#">4732456N10Rik</a> | 0.928 | -0.652 | 0.534471  | 0.768432 |
| 14328 | 10402422 | <a href="#">NM_027997</a>          | <a href="#">71907</a>     | serine (or cysteine) peptidase | <a href="#">Serpina9</a>      | 0.928 | -0.409 | 0.694222  | 0.865724 |
| 14329 | 10584522 | <a href="#">NM_146286</a>          | <a href="#">258283</a>    | olfactory receptor 981         | <a href="#">Olfr981</a>       | 0.928 | -0.87  | 0.412468  | 0.676163 |
| 14330 | 10401519 | <a href="#">NM_023409</a>          | <a href="#">67963</a>     | Niemann Pick type C2           | <a href="#">Npc2</a>          | 0.928 | -1.344 | 0.219743  | 0.488612 |
| 14331 | 10485667 | <a href="#">NM_026992</a>          | <a href="#">99349</a>     | DPH4 homolog (JJJ3, S. cerevis | <a href="#">Dph4</a>          | 0.928 | -1.624 | 0.147194  | 0.389229 |
| 14332 | 10367059 | <a href="#">NM_145424</a>          | <a href="#">216454</a>    | cDNA sequence BC089597         | <a href="#">BC089597</a>      | 0.928 | -0.691 | 0.511403  | 0.752366 |
| 14333 | 10459620 | <a href="#">NM_001082553</a>       | <a href="#">80718</a>     | RAB27b, member RAS oncogene fa | <a href="#">Rab27b</a>        | 0.928 | -0.825 | 0.435605  | 0.695606 |
| 14334 | 10585842 | <a href="#">NM_009145</a>          | <a href="#">20320</a>     | neuroplastin                   | <a href="#">Nptn</a>          | 0.928 | -0.787 | 0.456395  | 0.712554 |
| 14335 | 10410345 | <a href="#">NM_001035231</a>       | <a href="#">212276</a>    | zinc finger protein 748        | <a href="#">Zfp748</a>        | 0.928 | -0.977 | 0.360426  | 0.632225 |
| 14336 | 10535378 | <a href="#">ENSMUST00000014133</a> | <a href="#">442800</a>    | RIKEN cDNA D430018E03 gene     | <a href="#">D430018E03Rik</a> | 0.928 | -1.187 | 0.272679  | 0.547117 |
| 14337 | 10351182 | <a href="#">NM_011345</a>          | <a href="#">20339</a>     | selectin, endothelial cell     | <a href="#">Sele</a>          | 0.928 | -1.385 | 0.20729   | 0.47169  |
| 14338 | 10348150 | <a href="#">NM_021600</a>          | <a href="#">11447</a>     | cholinergic receptor, nicotini | <a href="#">Chrm4</a>         | 0.927 | -0.358 | 0.730457  | 0.883456 |
| 14339 | 10593270 | <a href="#">NM_172770</a>          | <a href="#">235330</a>    | tetratricopeptide repeat domai | <a href="#">Ttc12</a>         | 0.927 | -1.193 | 0.270599  | 0.545272 |
| 14340 | 10567442 | <a href="#">XM_355934</a>          | <a href="#">381917</a>    | dynein, axonemal, heavy chain  | <a href="#">Dnahe3</a>        | 0.927 | -0.4   | 0.700595  | 0.86896  |
| 14341 | 10377593 | <a href="#">NM_029348</a>          | <a href="#">75580</a>     | zinc finger and BTB domain con | <a href="#">Zbtb4</a>         | 0.927 | -0.874 | 0.410414  | 0.67479  |
| 14342 | 10400135 |                                    |                           |                                |                               | 0.927 | -0.5   | 0.631815  | 0.832719 |
| 14343 | 10351013 | <a href="#">NM_001024952</a>       | <a href="#">381305</a>    | RING CCCH (C3H) domains 1      | <a href="#">Rc3h1</a>         | 0.927 | -1.665 | 0.138585  | 0.376638 |
| 14344 | 10454828 | <a href="#">AY223547</a>           | <a href="#">448986</a>    | cDNA sequence AY223547         | <a href="#">AY223547</a>      | 0.927 | -1.242 | 0.253116  | 0.527384 |
| 14345 | 10428396 |                                    |                           |                                |                               | 0.927 | -0.876 | 0.409107  | 0.673396 |
| 14346 | 10515744 | <a href="#">NM_023223</a>          | <a href="#">107995</a>    | cell division cycle 20 homolog | <a href="#">Cdc20</a>         | 0.927 | -1.589 | 0.154731  | 0.399955 |
| 14347 | 10538857 | <a href="#">NM_025814</a>          | <a href="#">66870</a>     | Serpine1 mRNA binding protein  | <a href="#">Serbp1</a>        | 0.927 | -1.738 | 0.124475  | 0.35337  |
| 14348 | 10414355 | <a href="#">NM_178684</a>          | <a href="#">218975</a>    | mitogen-activated protein kina | <a href="#">Mapk1ip11</a>     | 0.927 | -1.731 | 0.125786  | 0.355049 |
| 14349 | 10356873 |                                    |                           |                                |                               | 0.927 | -0.725 | 0.491167  | 0.737693 |
| 14350 | 10579119 | <a href="#">NM_023312</a>          | <a href="#">67184</a>     | NADH dehydrogenase (ubiquinone | <a href="#">Ndufa13</a>       | 0.927 | -2.051 | 0.0782684 | 0.266177 |
| 14351 | 10394344 |                                    |                           |                                |                               | 0.927 | -1.021 | 0.340311  | 0.61558  |
| 14352 | 10560300 | <a href="#">NM_173430</a>          | <a href="#">243853</a>    | fukutin related protein        | <a href="#">Fkrp</a>          | 0.927 | -1.792 | 0.114978  | 0.337276 |
| 14353 | 10351056 | <a href="#">BC049713</a>           | <a href="#">73844</a>     | ankyrin repeat domain 45       | <a href="#">Ankrd45</a>       | 0.927 | -2.043 | 0.0791609 | 0.267948 |
| 14354 | 10376410 | <a href="#">NM_146538</a>          | <a href="#">258531</a>    | olfactory receptor 315         | <a href="#">Olfr315</a>       | 0.927 | -0.759 | 0.47205   | 0.723892 |
| 14355 | 10499859 |                                    |                           |                                |                               | 0.927 | -1.015 | 0.342905  | 0.617132 |
| 14356 | 10485656 | <a href="#">NM_023876</a>          | <a href="#">77766</a>     | elongation protein 4 homolog ( | <a href="#">Elp4</a>          | 0.927 | -1.84  | 0.107034  | 0.322599 |
| 14357 | 10447502 | <a href="#">NM_009625</a>          | <a href="#">11516</a>     | adenylate cyclase activating p | <a href="#">Adcyap1</a>       | 0.927 | -1.244 | 0.252483  | 0.526583 |
| 14358 | 10368893 | <a href="#">NM_145743</a>          | <a href="#">215951</a>    | lactation elevated 1           | <a href="#">Lace1</a>         | 0.927 | -1.466 | 0.18473   | 0.442299 |
| 14359 | 10444439 | <a href="#">NM_017406</a>          | <a href="#">12915</a>     | cAMP responsive element bindin | <a href="#">Crebl1</a>        | 0.927 | -1.812 | 0.111559  | 0.330459 |
| 14360 | 10516753 | <a href="#">NM_001034872</a>       | <a href="#">332942</a>    | gene model 853, (NCBI)         | <a href="#">Gm853</a>         | 0.927 | -1.18  | 0.27527   | 0.550143 |
| 14361 | 10407543 | <a href="#">NM_027000</a>          | <a href="#">69237</a>     | GTP binding protein 4          | <a href="#">Gtbp4</a>         | 0.927 | -1.761 | 0.120441  | 0.346759 |
| 14362 | 10357133 |                                    |                           |                                |                               | 0.927 | -1.702 | 0.131322  | 0.363963 |
| 14363 | 10604497 | <a href="#">NM_001011794</a>       | <a href="#">257978</a>    | olfactory receptor 1322        | <a href="#">Olfr1322</a>      | 0.927 | -0.321 | 0.757545  | 0.898154 |
| 14364 | 10485170 | <a href="#">NM_009963</a>          | <a href="#">12953</a>     | cryptochrome 2 (photolyase-lik | <a href="#">Cry2</a>          | 0.927 | -1.773 | 0.118318  | 0.343378 |
| 14365 | 10383353 | <a href="#">NM_145363</a>          | <a href="#">208634</a>    | tetraspanin 10                 | <a href="#">Tspan10</a>       | 0.927 | -1.105 | 0.304681  | 0.581126 |
| 14366 | 10502395 | <a href="#">ENSMUST00000012186</a> | <a href="#">67741</a>     | RIKEN cDNA 4930579F01 gene     | <a href="#">4930579F01Rik</a> | 0.927 | -0.427 | 0.682038  | 0.859468 |
| 14367 | 10574404 | <a href="#">NM_001035123</a>       | <a href="#">66083</a>     | SET domain containing 6        | <a href="#">Setd6</a>         | 0.927 | -1.439 | 0.192012  | 0.451351 |
| 14368 | 10529873 | <a href="#">AB232585</a>           | <a href="#">59021</a>     | RAB2A, member RAS oncogene fam | <a href="#">Rab2a</a>         | 0.927 | -1.036 | 0.333695  | 0.609432 |

|       |          |                                    |                        |                                  |                                    |       |        |           |          |
|-------|----------|------------------------------------|------------------------|----------------------------------|------------------------------------|-------|--------|-----------|----------|
| 14369 | 10397083 | <a href="#">NM_027349</a>          | <a href="#">67039</a>  | RNA binding motif protein 25     | <a href="#">Rbm25</a>              | 0.927 | -1.316 | 0.228386  | 0.49943  |
| 14370 | 10474243 | <a href="#">NM_145529</a>          | <a href="#">228410</a> | cleavage stimulation factor, 3   | <a href="#">Cstf3</a>              | 0.927 | -1.895 | 0.0986442 | 0.306683 |
| 14371 | 10574220 | <a href="#">NM_009142</a>          | <a href="#">20312</a>  | chemokine (C-X3-C motif) ligand  | <a href="#">Cx3cl1</a>             | 0.927 | -0.773 | 0.464142  | 0.717962 |
| 14372 | 10352838 | <a href="#">NM_008484</a>          | <a href="#">16780</a>  | laminin, beta 3                  | <a href="#">Lamb3</a>              | 0.927 | -1.397 | 0.204016  | 0.467308 |
| 14373 | 10513604 | <a href="#">NM_024257</a>          | <a href="#">72748</a>  | haloacid dehalogenase-like hyd   | <a href="#">Hdh3</a>               | 0.927 | -0.72  | 0.49429   | 0.739556 |
| 14374 | 10582427 | <a href="#">NM_009824</a>          | <a href="#">12398</a>  | core-binding factor, runt doma   | <a href="#">Cbfa2t3</a>            | 0.927 | -0.743 | 0.481132  | 0.730704 |
| 14375 | 10412218 | <a href="#">NM_008196</a>          | <a href="#">14945</a>  | granzyme K                       | <a href="#">Gzmk</a>               | 0.927 | -0.848 | 0.423771  | 0.686081 |
| 14376 | 10437191 | <a href="#">NM_033149</a>          | <a href="#">93961</a>  | UDP-Gal:betaGlcNAc beta 1,3-ga   | <a href="#">B3galt5</a>            | 0.927 | -1.351 | 0.217602  | 0.485334 |
| 14377 | 10594186 | <a href="#">XR_001723</a>          | <a href="#">665385</a> | predicted gene, EG665385         | <a href="#">EG665385</a>           | 0.927 | -0.563 | 0.590705  | 0.806356 |
| 14378 | 10586252 | <a href="#">XM_001476259</a>       | <a href="#">102442</a> | DENN/MADD domain containing 4A   | <a href="#">Dennd4a</a>            | 0.927 | -0.764 | 0.469162  | 0.721405 |
| 14379 | 10515702 | <a href="#">ENSMUST00000075406</a> | <a href="#">230676</a> | cDNA sequence BC059842           | <a href="#">BC059842</a>           | 0.927 | -1.786 | 0.115998  | 0.338719 |
| 14380 | 10457583 |                                    |                        |                                  |                                    | 0.927 | -1.235 | 0.255438  | 0.529807 |
| 14381 | 10412735 |                                    |                        |                                  |                                    | 0.927 | -0.865 | 0.414756  | 0.678079 |
| 14382 | 10576495 | <a href="#">BC094596</a>           | <a href="#">330863</a> | tripartite motif-containing 67   | <a href="#">Trim67</a>             | 0.927 | -1.145 | 0.288836  | 0.564954 |
| 14383 | 10476617 | <a href="#">XR_034950</a>          | <a href="#">677513</a> | similar to RNA binding motif p   | <a href="#">LOC677513</a>          | 0.927 | -2.084 | 0.0744335 | 0.258046 |
| 14384 | 10439509 | <a href="#">BC115688</a>           | <a href="#">74663</a>  | RIKEN cDNA 4930435E12 gene       | <a href="#">4930435E12Rik</a>      | 0.927 | -0.65  | 0.535728  | 0.769213 |
| 14385 | 10587241 | <a href="#">NM_173731</a>          | <a href="#">208982</a> | 3-hydroxymethyl-3-methylglutar   | <a href="#">Hmgcl1</a>             | 0.927 | -0.454 | 0.663385  | 0.850117 |
| 14386 | 10515920 | <a href="#">NM_026494</a>          | <a href="#">106564</a> | phosphopantothenoylcysteine sy   | <a href="#">Ppcs</a>               | 0.927 | -1.421 | 0.197039  | 0.457727 |
| 14387 | 10528972 | <a href="#">NM_031875</a>          | <a href="#">83762</a>  | otofelin                         | <a href="#">Otof</a>               | 0.927 | -0.619 | 0.555232  | 0.783961 |
| 14388 | 10377467 | <a href="#">NM_033041</a>          | <a href="#">84653</a>  | hairy and enhancer of split 7    | <a href="#">Hes7</a>               | 0.927 | -1.547 | 0.164486  | 0.414282 |
| 14389 | 10550978 | <a href="#">NM_001102613</a>       | <a href="#">232970</a> | pleckstrin homology-like domai   | <a href="#">Phldb3</a>             | 0.927 | -0.62  | 0.554358  | 0.783473 |
| 14390 | 10479397 | <a href="#">NM_018766</a>          | <a href="#">18216</a>  | neurotensin receptor 1           | <a href="#">Ntsr1</a>              | 0.927 | -0.36  | 0.728834  | 0.882565 |
| 14391 | 10492454 |                                    |                        |                                  |                                    | 0.927 | -1.099 | 0.307238  | 0.583826 |
| 14392 | 10355916 | <a href="#">NM_008781</a>          | <a href="#">18505</a>  | paired box gene 3                | <a href="#">Pax3</a>               | 0.927 | -0.741 | 0.48219   | 0.730954 |
| 14393 | 10407262 | <a href="#">ENSMUST00000109244</a> | <a href="#">238896</a> | cell division cycle 20 homolog   | <a href="#">Cdc20b</a>             | 0.927 | -0.613 | 0.558633  | 0.786292 |
| 14394 | 10555087 |                                    |                        |                                  |                                    | 0.927 | -0.441 | 0.672386  | 0.854651 |
| 14395 | 10451110 | <a href="#">NM_008302</a>          | <a href="#">15516</a>  | heat shock protein 90kDa alpha   | <a href="#">Hsp90ab1</a>           | 0.927 | -1.765 | 0.11964   | 0.345914 |
| 14396 | 10394109 | <a href="#">NM_139147</a>          | <a href="#">217371</a> | Rab40b, member RAS oncogene fa   | <a href="#">Rab40b</a>             | 0.927 | -0.923 | 0.385813  | 0.654758 |
| 14397 | 10595895 | <a href="#">BC092140</a>           | <a href="#">75881</a>  | RIKEN cDNA 4930579K19 gene       | <a href="#">4930579K19Rik</a>      | 0.927 | -0.84  | 0.427767  | 0.689074 |
| 14398 | 10415991 | <a href="#">NM_199029</a>          | <a href="#">380912</a> | zinc finger protein 395          | <a href="#">Zfp395</a>             | 0.927 | -1.946 | 0.0915464 | 0.293059 |
| 14399 | 10514338 |                                    |                        |                                  |                                    | 0.927 | -0.379 | 0.71558   | 0.875402 |
| 14400 | 10358357 | <a href="#">ENSMUST00000081144</a> | <a href="#">226472</a> | predicted gene, EG226472         | <a href="#">EG226472</a>           | 0.927 | -1.632 | 0.145362  | 0.387047 |
| 14401 | 10475879 | <a href="#">ENSMUST00000099394</a> | <a href="#">241634</a> | gene model 355, (NCBI)           | <a href="#">Gm355</a>              | 0.927 | -1.127 | 0.296005  | 0.572462 |
| 14402 | 10598087 | <a href="#">ENSMUST00000082419</a> | <a href="#">17722</a>  | NADH dehydrogenase subunit 6     | <a href="#">ND6</a>                | 0.927 | -1.12  | 0.298438  | 0.574644 |
| 14403 | 10546919 | <a href="#">BC116825</a>           | <a href="#">101122</a> | RNA pseudouridylylase synthase d | <a href="#">Rpusd3</a>             | 0.927 | -1.217 | 0.261941  | 0.536363 |
| 14404 | 10478892 | <a href="#">ENSMUST00000021742</a> | <a href="#">329562</a> | RIKEN cDNA A530013C23 gene       | <a href="#">A530013C23Rik</a>      | 0.927 | -1.033 | 0.334826  | 0.610375 |
| 14405 | 10488802 |                                    |                        |                                  |                                    | 0.927 | -1.11  | 0.302658  | 0.578712 |
| 14406 | 10463211 | <a href="#">NM_145501</a>          | <a href="#">84095</a>  | phosphatidylinositol 4-kinase    | <a href="#">Pik42a</a>             | 0.927 | -2.142 | 0.0683171 | 0.244333 |
| 14407 | 10460787 | <a href="#">NM_194348</a>          | <a href="#">329015</a> | ATG2 autophagy related 2 homol   | <a href="#">Atg2a</a>              | 0.927 | -1.709 | 0.129895  | 0.361535 |
| 14408 | 10519636 |                                    |                        |                                  |                                    | 0.927 | -1.499 | 0.176355  | 0.430187 |
| 14409 | 10459925 | <a href="#">ENSMUST00000037107</a> | <a href="#">791289</a> | predicted gene, ENSMUSG0000005   | <a href="#">ENSMUSG00000053474</a> | 0.927 | -1.015 | 0.342936  | 0.617132 |
| 14410 | 10363231 | <a href="#">NM_020561</a>          | <a href="#">57319</a>  | sphingomyelin phosphodiesteras   | <a href="#">Smpd3a</a>             | 0.927 | -1.066 | 0.32077   | 0.597672 |
| 14411 | 10436606 |                                    |                        |                                  |                                    | 0.927 | -0.891 | 0.401489  | 0.666803 |
| 14412 | 10589128 |                                    |                        |                                  |                                    | 0.927 | -1.026 | 0.33787   | 0.613423 |
| 14413 | 10507362 | <a href="#">NM_133250</a>          | <a href="#">70603</a>  | mutY homolog (E. coli)           | <a href="#">Mutyh</a>              | 0.927 | -1.383 | 0.208003  | 0.472478 |
| 14414 | 10461038 | <a href="#">NM_134147</a>          | <a href="#">107227</a> | MACRO domain containing 1        | <a href="#">Macrodl</a>            | 0.927 | -1.458 | 0.186924  | 0.445182 |
| 14415 | 10478075 |                                    |                        |                                  |                                    | 0.927 | -0.702 | 0.504852  | 0.747036 |
| 14416 | 10356671 | <a href="#">NM_147038</a>          | <a href="#">259040</a> | olfactory receptor 1416          | <a href="#">Olf1416</a>            | 0.927 | -0.539 | 0.605858  | 0.8162   |
| 14417 | 10518385 | <a href="#">NM_133201</a>          | <a href="#">170731</a> | mitofusin 2                      | <a href="#">Mfn2</a>               | 0.927 | -1.762 | 0.12025   | 0.346577 |
| 14418 | 10529549 | <a href="#">NM_001113362</a>       | <a href="#">100855</a> | TBC1 domain family, member 14    | <a href="#">Tbc1d14</a>            | 0.927 | -1.589 | 0.154845  | 0.400004 |
| 14419 | 10550160 | <a href="#">BC060131</a>           | <a href="#">228920</a> | DDP finger protein 20            | <a href="#">Dfp20</a>              | 0.927 | -0.87  | 0.412275  | 0.676162 |

|       |          |                                    |                           |                                 |                                    |       |        |           |          |
|-------|----------|------------------------------------|---------------------------|---------------------------------|------------------------------------|-------|--------|-----------|----------|
| 14419 | 10530109 | <a href="#">BC000121</a>           | <a href="#">228627</a>    | FHD finger protein 20           | <a href="#">Fm20</a>               | 0.927 | -0.87  | 0.412573  | 0.070103 |
| 14420 | 10474526 | <a href="#">NM_207206</a>          | <a href="#">99010</a>     | 1-acylglycerol-3-phosphate O-a  | <a href="#">Agpat7</a>             | 0.926 | -2.164 | 0.0660281 | 0.239756 |
| 14421 | 10450089 | <a href="#">NM_009066</a>          | <a href="#">19763</a>     | ring finger protein 1           | <a href="#">Ring1</a>              | 0.926 | -0.904 | 0.395278  | 0.66309  |
| 14422 | 10515396 | <a href="#">ENSMUST00000106445</a> | <a href="#">78611</a>     | RIKEN cDNA 9530048O09 gene      | <a href="#">9530048O09Rik</a>      | 0.926 | -0.947 | 0.374485  | 0.644557 |
| 14423 | 10460291 | <a href="#">NM_021791</a>          | <a href="#">60425</a>     | double C2, gamma                | <a href="#">Doc2g</a>              | 0.926 | -1.489 | 0.178878  | 0.43395  |
| 14424 | 10495675 | <a href="#">NM_010171</a>          | <a href="#">14066</a>     | coagulation factor III          | <a href="#">F3</a>                 | 0.926 | -0.769 | 0.466405  | 0.719571 |
| 14425 | 10524668 | <a href="#">NM_026504</a>          | <a href="#">52064</a>     | coenzyme Q5 homolog, methyltra  | <a href="#">Coq5</a>               | 0.926 | -1.455 | 0.187797  | 0.446159 |
| 14426 | 10564377 | <a href="#">NM_146191</a>          | <a href="#">233328</a>    | leucine-rich repeat kinase 1    | <a href="#">Lrrk1</a>              | 0.926 | -1.453 | 0.188438  | 0.446521 |
| 14427 | 10388623 |                                    |                           |                                 |                                    | 0.926 | -1.402 | 0.202469  | 0.465275 |
| 14428 | 10466110 | <a href="#">NM_023529</a>          | <a href="#">69826</a>     | membrane-spanning 4-domains, s  | <a href="#">Ms4a10</a>             | 0.926 | -0.354 | 0.733498  | 0.88593  |
| 14429 | 10416107 | <a href="#">ENSMUST00000071522</a> | <a href="#">791407</a>    | predicted gene, ENSMUSG0000005  | <a href="#">ENSMUSG00000057913</a> | 0.926 | -0.44  | 0.672864  | 0.854651 |
| 14430 | 10512655 | <a href="#">NM_001038993</a>       | <a href="#">73469</a>     | ring finger protein 38          | <a href="#">Rnf38</a>              | 0.926 | -1.39  | 0.205833  | 0.46974  |
| 14431 | 10351749 | <a href="#">NM_153555</a>          | <a href="#">98193</a>     | WD repeat domain 42A            | <a href="#">Wdr42a</a>             | 0.926 | -1.739 | 0.124407  | 0.35332  |
| 14432 | 10590135 | <a href="#">ENSMUST00000093527</a> | <a href="#">100038738</a> | predicted gene, ENSMUSG0000007  | <a href="#">ENSMUSG00000074029</a> | 0.926 | -0.308 | 0.766667  | 0.902924 |
| 14433 | 10405942 | <a href="#">ENSMUST00000060609</a> | <a href="#">328280</a>    | predicted gene, EG328280        | <a href="#">EG328280</a>           | 0.926 | -0.721 | 0.493403  | 0.739056 |
| 14434 | 10561861 | <a href="#">ENSMUST00000047308</a> | <a href="#">381867</a>    | OVO homolog-like 3 (Drosophila) | <a href="#">Ovol3</a>              | 0.926 | -0.831 | 0.432754  | 0.693239 |
| 14435 | 10467342 | <a href="#">ENSMUST00000065022</a> | <a href="#">791286</a>    | predicted gene, ENSMUSG0000005  | <a href="#">ENSMUSG00000052663</a> | 0.926 | -0.521 | 0.617906  | 0.823459 |
| 14436 | 10465625 | <a href="#">NM_134150</a>          | <a href="#">107260</a>    | OTU domain, ubiquitin aldehyde  | <a href="#">Otbl1</a>              | 0.926 | -1.898 | 0.0983371 | 0.306086 |
| 14437 | 10405303 | <a href="#">NM_001033364</a>       | <a href="#">268663</a>    | protocadherin 24                | <a href="#">Pcdh24</a>             | 0.926 | -1.014 | 0.343476  | 0.617556 |
| 14438 | 10353296 | <a href="#">NM_026456</a>          | <a href="#">67923</a>     | transcription elongation facto  | <a href="#">Tceb1</a>              | 0.926 | -1.622 | 0.147551  | 0.389587 |
| 14439 | 10383012 | <a href="#">NM_133757</a>          | <a href="#">74451</a>     | phosphatidylglycerophosphate s  | <a href="#">Pgs1</a>               | 0.926 | -1.46  | 0.186565  | 0.444895 |
| 14440 | 10368159 | <a href="#">NM_029529</a>          | <a href="#">76157</a>     | solute carrier family 35, memb  | <a href="#">Slc35d3</a>            | 0.926 | -0.232 | 0.822709  | 0.929111 |
| 14441 | 10471909 |                                    |                           |                                 |                                    | 0.926 | -0.825 | 0.435685  | 0.695606 |
| 14442 | 10360741 | <a href="#">ENSMUST00000058825</a> | <a href="#">403180</a>    | coiled-coil domain containing   | <a href="#">Ccdc121</a>            | 0.926 | -1.032 | 0.335227  | 0.610757 |
| 14443 | 10347503 | <a href="#">NM_009872</a>          | <a href="#">12570</a>     | cyclin-dependent kinase 5, reg  | <a href="#">Cdk5r2</a>             | 0.926 | -1.504 | 0.175116  | 0.428251 |
| 14444 | 10565968 | <a href="#">NM_001111111</a>       | <a href="#">73683</a>     | autophagy related 16 like 2 (S  | <a href="#">Atg16l2</a>            | 0.926 | -1.435 | 0.193182  | 0.452493 |
| 14445 | 10582123 | <a href="#">NM_175185</a>          | <a href="#">72552</a>     | hydroxysteroid dehydrogenase 1  | <a href="#">Hsd1l</a>              | 0.926 | -1.42  | 0.197314  | 0.457905 |
| 14446 | 10558971 | <a href="#">NM_007459</a>          | <a href="#">11772</a>     | adaptor protein complex AP-2,   | <a href="#">Ap2a2</a>              | 0.926 | -1.555 | 0.162734  | 0.411428 |
| 14447 | 10390816 | <a href="#">NM_010666</a>          | <a href="#">16675</a>     | keratin 27                      | <a href="#">Krt27</a>              | 0.926 | -0.505 | 0.628618  | 0.830964 |
| 14448 | 10575873 | <a href="#">NM_027950</a>          | <a href="#">71839</a>     | oxidative stress induced growt  | <a href="#">Osgin1</a>             | 0.926 | -0.96  | 0.367959  | 0.638955 |
| 14449 | 10593756 | <a href="#">NM_145129</a>          | <a href="#">110834</a>    | cholinergic receptor, nicotini  | <a href="#">Chrna3</a>             | 0.926 | -1.427 | 0.195427  | 0.45573  |
| 14450 | 10509635 | <a href="#">NM_025337</a>          | <a href="#">110198</a>    | aldo-keto reductase family 7,   | <a href="#">Akr7a5</a>             | 0.926 | -1.835 | 0.107874  | 0.323945 |
| 14451 | 10364916 | <a href="#">NM_175195</a>          | <a href="#">73218</a>     | RIKEN cDNA 3110056O03 gene      | <a href="#">3110056O03Rik</a>      | 0.926 | -1.328 | 0.224703  | 0.494806 |
| 14452 | 10594855 | <a href="#">NM_026599</a>          | <a href="#">68178</a>     | cingulin-like 1                 | <a href="#">Cgnl1</a>              | 0.926 | -1.01  | 0.345353  | 0.619455 |
| 14453 | 10371842 | <a href="#">AK087890</a>           | <a href="#">791344</a>    | predicted gene, ENSMUSG0000005  | <a href="#">ENSMUSG00000054515</a> | 0.926 | -1.291 | 0.236464  | 0.508575 |
| 14454 | 10461164 | <a href="#">NM_134139</a>          | <a href="#">107071</a>    | WD repeat domain 74             | <a href="#">Wdr74</a>              | 0.926 | -2.126 | 0.0698916 | 0.247709 |
| 14455 | 10590381 | <a href="#">NM_011703</a>          | <a href="#">22354</a>     | vasoactive intestinal peptide   | <a href="#">Vipr1</a>              | 0.926 | -0.939 | 0.377978  | 0.647713 |
| 14456 | 10502845 | <a href="#">BC098205</a>           | <a href="#">215708</a>    | RIKEN cDNA C030011O14 gene      | <a href="#">C030011O14Rik</a>      | 0.926 | -1.529 | 0.168744  | 0.420183 |
| 14457 | 10405894 | <a href="#">NM_008959</a>          | <a href="#">19210</a>     | phosphatidylserine synthase 1   | <a href="#">Ptdss1</a>             | 0.926 | -1.298 | 0.234099  | 0.50534  |
| 14458 | 10401900 | <a href="#">NM_001039089</a>       | <a href="#">20338</a>     | sel-1 suppressor of lin-12-lik  | <a href="#">Sel1l</a>              | 0.926 | -1.382 | 0.208326  | 0.472978 |
| 14459 | 10541069 | <a href="#">NM_146759</a>          | <a href="#">258754</a>    | olfactory receptor 214          | <a href="#">Olfr214</a>            | 0.926 | -0.505 | 0.62871   | 0.830996 |
| 14460 | 10398075 | <a href="#">NM_009252</a>          | <a href="#">20716</a>     | serine (or cysteine) peptidase  | <a href="#">Serpina3n</a>          | 0.926 | -0.513 | 0.623017  | 0.827506 |
| 14461 | 10555925 | <a href="#">NM_001033317</a>       | <a href="#">233649</a>    | cyclic nucleotide gated channe  | <a href="#">Cnga4</a>              | 0.926 | -1.556 | 0.162524  | 0.411049 |
| 14462 | 10400474 | <a href="#">NM_009385</a>          | <a href="#">21869</a>     | NK2 homeobox 1                  | <a href="#">Nkx2-1</a>             | 0.926 | -0.847 | 0.424312  | 0.686483 |
| 14463 | 10345608 | <a href="#">NM_026123</a>          | <a href="#">67387</a>     | unc-50 homolog (C. elegans)     | <a href="#">Unc50</a>              | 0.926 | -1.421 | 0.196963  | 0.457727 |
| 14464 | 10502214 | <a href="#">ENSMUST00000106337</a> | <a href="#">71519</a>     | cytochrome P450, family 2, sub  | <a href="#">Cyp2u1</a>             | 0.926 | -1.414 | 0.198949  | 0.460238 |
| 14465 | 10460263 | <a href="#">NM_027857</a>          | <a href="#">71670</a>     | aspartoacylase (aminoacylase)   | <a href="#">Acy3</a>               | 0.926 | -1.22  | 0.260935  | 0.535507 |
| 14466 | 10520355 | <a href="#">NM_008314</a>          | <a href="#">15563</a>     | 5-hydroxytryptamine (serotonin  | <a href="#">Htr5a</a>              | 0.926 | -0.391 | 0.707374  | 0.872175 |
| 14467 | 10345406 |                                    |                           |                                 |                                    | 0.926 | -1.485 | 0.179872  | 0.435199 |

|       |          |                                    |                           |                                |                                    |       |        |           |          |
|-------|----------|------------------------------------|---------------------------|--------------------------------|------------------------------------|-------|--------|-----------|----------|
| 14468 | 10465354 | <a href="#">BC118930</a>           | <a href="#">68505</a>     | RIKEN cDNA 1110014N23 gene     | <a href="#">1110014N23Rik</a>      | 0.926 | -1.735 | 0.125023  | 0.354024 |
| 14469 | 10479324 | <a href="#">NM_181424</a>          | <a href="#">52856</a>     | GTP binding protein 5          | <a href="#">Gtbp5</a>              | 0.926 | -1.55  | 0.163848  | 0.413216 |
| 14470 | 10517488 | <a href="#">NM_010142</a>          | <a href="#">13844</a>     | Eph receptor B2                | <a href="#">Ephb2</a>              | 0.926 | -1.376 | 0.210089  | 0.475449 |
| 14471 | 10450116 | <a href="#">NM_008202</a>          | <a href="#">14977</a>     | solute carrier family 39 (zinc | <a href="#">Slc39a7</a>            | 0.926 | -1.291 | 0.236682  | 0.508784 |
| 14472 | 10470166 | <a href="#">NM_178036</a>          | <a href="#">332578</a>    | lipocalin 10                   | <a href="#">Lcn10</a>              | 0.926 | -1.354 | 0.216629  | 0.483982 |
| 14473 | 10574478 | <a href="#">AK158572</a>           | <a href="#">100038474</a> | predicted gene, ENSMUSG0000007 | <a href="#">ENSMUSG00000074125</a> | 0.926 | -0.88  | 0.407419  | 0.671862 |
| 14474 | 10567645 | <a href="#">NM_026140</a>          | <a href="#">67417</a>     | glutamyl-tRNA synthetase 2 (mi | <a href="#">Ears2</a>              | 0.926 | -1.884 | 0.100316  | 0.309873 |
| 14475 | 10442549 | <a href="#">NM_183149</a>          | <a href="#">213753</a>    | zinc finger protein 598        | <a href="#">Zfp598</a>             | 0.926 | -1.43  | 0.194527  | 0.454622 |
| 14476 | 10576934 | <a href="#">NM_173446</a>          | <a href="#">270028</a>    | expressed sequence AW121567    | <a href="#">AW121567</a>           | 0.926 | -0.672 | 0.522592  | 0.759322 |
| 14477 | 10416023 | <a href="#">NM_028903</a>          | <a href="#">71145</a>     | scavenger receptor class A, me | <a href="#">Scara5</a>             | 0.926 | -1.137 | 0.292016  | 0.568125 |
| 14478 | 10413497 | <a href="#">NM_019979</a>          | <a href="#">80795</a>     | selenoprotein K                | <a href="#">Selk</a>               | 0.926 | -0.979 | 0.359188  | 0.63128  |
| 14479 | 10570618 | <a href="#">NM_001025351</a>       | <a href="#">574081</a>    | predicted gene, EG574081       | <a href="#">EG574081</a>           | 0.926 | -0.091 | 0.930157  | 0.972567 |
| 14480 | 10557782 | <a href="#">NM_133943</a>          | <a href="#">101502</a>    | hydroxy-delta-5-steroid dehydr | <a href="#">Hsd3b7</a>             | 0.926 | -1.701 | 0.131388  | 0.364051 |
| 14481 | 10580469 | <a href="#">NM_019626</a>          | <a href="#">12404</a>     | cerebellin 1 precursor protein | <a href="#">Cbln1</a>              | 0.926 | -0.434 | 0.676769  | 0.856344 |
| 14482 | 10345967 | <a href="#">NM_144558</a>          | <a href="#">246229</a>    | basic, immunoglobulin-like var | <a href="#">Bivm</a>               | 0.926 | -1.48  | 0.181113  | 0.437053 |
| 14483 | 10399461 | <a href="#">XR_034642</a>          | <a href="#">238091</a>    | similar to Glyceraldehyde-3-ph | <a href="#">LOC238091</a>          | 0.926 | -0.991 | 0.353868  | 0.626543 |
| 14484 | 10500710 | <a href="#">BC037703</a>           | <a href="#">242125</a>    | cDNA sequence BC037703         | <a href="#">BC037703</a>           | 0.926 | -1.37  | 0.211881  | 0.477389 |
| 14485 | 10584975 | <a href="#">AK139379</a>           | <a href="#">100101457</a> | predicted gene, ENSMUSG0000007 | <a href="#">ENSMUSG00000074379</a> | 0.926 | -1.149 | 0.287274  | 0.562985 |
| 14486 | 10560868 | <a href="#">NM_001033205</a>       | <a href="#">101544</a>    | zinc finger protein 575        | <a href="#">Zfp575</a>             | 0.925 | -1.006 | 0.347022  | 0.621237 |
| 14487 | 10437174 | <a href="#">NM_207301</a>          | <a href="#">71446</a>     | tryptophan rich basic protein  | <a href="#">Wrb</a>                | 0.925 | -0.983 | 0.357343  | 0.629743 |
| 14488 | 10386262 | <a href="#">BC044882</a>           | <a href="#">380698</a>    | obscurin, cytoskeletal calmodu | <a href="#">Obscn</a>              | 0.925 | -0.673 | 0.52169   | 0.75888  |
| 14489 | 10454606 | <a href="#">NM_001110015</a>       | <a href="#">225348</a>    | WD repeat domain 36            | <a href="#">Wdr36</a>              | 0.925 | -1.524 | 0.170203  | 0.421869 |
| 14490 | 10450752 | <a href="#">NM_024468</a>          | <a href="#">79263</a>     | tripartite motif-containing 39 | <a href="#">Trim39</a>             | 0.925 | -1.179 | 0.27598   | 0.550828 |
| 14491 | 10432135 | <a href="#">NM_027304</a>          | <a href="#">70069</a>     | H1 histone family, member N, t | <a href="#">H1fnt</a>              | 0.925 | -1.683 | 0.134893  | 0.370228 |
| 14492 | 10449000 | <a href="#">NM_018857</a>          | <a href="#">56047</a>     | mesothelin                     | <a href="#">Msln</a>               | 0.925 | -0.778 | 0.461369  | 0.715977 |
| 14493 | 10412828 |                                    |                           |                                |                                    | 0.925 | -1.242 | 0.253227  | 0.527562 |
| 14494 | 10542319 | <a href="#">NM_001109914</a>       | <a href="#">381823</a>    | apolipoprotein L domain contai | <a href="#">Apolo1</a>             | 0.925 | -0.911 | 0.391895  | 0.660136 |
| 14495 | 10415873 |                                    |                           |                                |                                    | 0.925 | -0.715 | 0.497082  | 0.741437 |
| 14496 | 10592217 | <a href="#">NM_008408</a>          | <a href="#">16430</a>     | STT3, subunit of the oligosacc | <a href="#">Stt3a</a>              | 0.925 | -2.173 | 0.0651787 | 0.238029 |
| 14497 | 10399308 | <a href="#">NM_016863</a>          | <a href="#">14226</a>     | FK506 binding protein 1b       | <a href="#">Fkbp1b</a>             | 0.925 | -1.244 | 0.252569  | 0.526711 |
| 14498 | 10603618 |                                    |                           |                                |                                    | 0.925 | -0.734 | 0.485892  | 0.734018 |
| 14499 | 10363967 |                                    |                           |                                |                                    | 0.925 | -0.447 | 0.668102  | 0.851935 |
| 14500 | 10363492 | <a href="#">ENSMUST00000020287</a> | <a href="#">237362</a>    | neuropeptide FF receptor 1     | <a href="#">Npffr1</a>             | 0.925 | -0.88  | 0.407115  | 0.671626 |
| 14501 | 10506454 | <a href="#">NM_133882</a>          | <a href="#">110382</a>    | complement component 8, beta s | <a href="#">C8b</a>                | 0.925 | -0.6   | 0.566613  | 0.792358 |
| 14502 | 10521824 | <a href="#">NM_011435</a>          | <a href="#">20657</a>     | superoxide dismutase 3, extrac | <a href="#">Sod3</a>               | 0.925 | -1.2   | 0.268058  | 0.542786 |
| 14503 | 10457780 | <a href="#">NM_001033445</a>       | <a href="#">381126</a>    | gene model 944, (NCBI)         | <a href="#">Gm944</a>              | 0.925 | -1.647 | 0.142371  | 0.382404 |
| 14504 | 10417794 | <a href="#">BC027644</a>           | <a href="#">67509</a>     | RIKEN cDNA 1810063B07 gene     | <a href="#">1810063B07Rik</a>      | 0.925 | -1.757 | 0.121054  | 0.347578 |
| 14505 | 10549862 | <a href="#">NM_177061</a>          | <a href="#">257882</a>    | olfactory receptor 1344        | <a href="#">Olfr1344</a>           | 0.925 | -0.587 | 0.575307  | 0.797076 |
| 14506 | 10468783 | <a href="#">NM_009501</a>          | <a href="#">22326</a>     | ventral anterior homeobox cont | <a href="#">Vax1</a>               | 0.925 | -1.249 | 0.250596  | 0.524406 |
| 14507 | 10551891 | <a href="#">NM_172142</a>          | <a href="#">243910</a>    | nuclear factor of kappa light  | <a href="#">Nfkbid</a>             | 0.925 | -1.434 | 0.193581  | 0.453103 |
| 14508 | 10393113 | <a href="#">NM_178802</a>          | <a href="#">338364</a>    | tripartite motif-containing 65 | <a href="#">Trim65</a>             | 0.925 | -1.075 | 0.317213  | 0.594448 |
| 14509 | 10556553 | <a href="#">NM_173767</a>          | <a href="#">233752</a>    | inscuteable homolog (Drosophil | <a href="#">Insc</a>               | 0.925 | -0.758 | 0.472341  | 0.724076 |
| 14510 | 10464836 | <a href="#">NM_013456</a>          | <a href="#">11474</a>     | actinin alpha 3                | <a href="#">Actn3</a>              | 0.925 | -0.986 | 0.356049  | 0.628563 |
| 14511 | 10502484 | <a href="#">NM_178654</a>          | <a href="#">109333</a>    | protein kinase N2              | <a href="#">Pkn2</a>               | 0.925 | -1.791 | 0.11518   | 0.337402 |
| 14512 | 10518075 | <a href="#">BC038692</a>           | <a href="#">329977</a>    | forkhead-associated (FHA) phos | <a href="#">Fhad1</a>              | 0.925 | -0.761 | 0.470571  | 0.722494 |
| 14513 | 10399224 | <a href="#">ENSMUST00000095903</a> | <a href="#">68571</a>     | RIKEN cDNA 1110002L01 gene     | <a href="#">1110002L01Rik</a>      | 0.925 | -1.132 | 0.293974  | 0.570098 |
| 14514 | 10417749 | <a href="#">NM_009455</a>          | <a href="#">22194</a>     | ubiquitin-conjugating enzyme E | <a href="#">Ube2e1</a>             | 0.925 | -1.484 | 0.180175  | 0.435693 |
| 14515 | 10436955 | <a href="#">ENSMUST00000054592</a> | <a href="#">76785</a>     | RIKEN cDNA 2410124H12 gene     | <a href="#">2410124H12Rik</a>      | 0.925 | -0.813 | 0.44199   | 0.70082  |
| 14516 | 10553537 | <a href="#">NM_178705</a>          | <a href="#">233271</a>    | leucine zipper protein 2       | <a href="#">Luzp2</a>              | 0.925 | -0.412 | 0.692523  | 0.865136 |
| 14517 | 10489958 | <a href="#">NM_001081134</a>       | <a href="#">241794</a>    | potassium voltage-gated channe | <a href="#">Kcng1</a>              | 0.925 | -1.597 | 0.153093  | 0.397119 |
| 14518 | 10568318 | <a href="#">NM_001081268</a>       | <a href="#">330657</a>    | cDNA sequence BC039632         | <a href="#">BC039632</a>           | 0.925 | -1.089 | 0.311226  | 0.587812 |
| 14519 | 10362052 | <a href="#">NM_178713</a>          | <a href="#">237320</a>    | aldehyde dehydrogenase 8 famil | <a href="#">Aldh8a1</a>            | 0.925 | -1.402 | 0.202554  | 0.465349 |
| 14520 | 10573998 | <a href="#">NM_177767</a>          | <a href="#">270086</a>    | 2-oxoglutarate and iron-depend | <a href="#">Ogfod1</a>             | 0.925 | -2.027 | 0.0810678 | 0.271716 |

|       |          |                                    |                           |                                    |                                    |       |        |           |          |
|-------|----------|------------------------------------|---------------------------|------------------------------------|------------------------------------|-------|--------|-----------|----------|
| 14521 | 10602722 | <a href="#">NM_001005370</a>       | <a href="#">278240</a>    | spindlin family, member 2          | <a href="#">Spin2</a>              | 0.925 | -1.366 | 0.213093  | 0.478965 |
| 14522 | 10473406 | <a href="#">NM_016914</a>          | <a href="#">53856</a>     | proteoglycan 3                     | <a href="#">Prg3</a>               | 0.925 | -1.114 | 0.30083   | 0.57699  |
| 14523 | 10450579 | <a href="#">NM_007584</a>          | <a href="#">12305</a>     | discoidin domain receptor fami     | <a href="#">Ddr1</a>               | 0.925 | -1.497 | 0.176846  | 0.431034 |
| 14524 | 10418616 | <a href="#">BC023155</a>           | <a href="#">110084</a>    | dynein, axonemal, heavy chain      | <a href="#">Dnahe1</a>             | 0.925 | -1.299 | 0.233791  | 0.505106 |
| 14525 | 10445741 |                                    |                           |                                    |                                    | 0.925 | -1.23  | 0.257249  | 0.53155  |
| 14526 | 10431732 | <a href="#">NM_026025</a>          | <a href="#">67197</a>     | zinc finger CCHC-type and RNA      | <a href="#">Zerb1</a>              | 0.925 | -1.876 | 0.101543  | 0.31225  |
| 14527 | 10379260 | <a href="#">AK154065</a>           | <a href="#">790910</a>    | predicted gene,<br>OTTMUSG00000000 | <a href="#">OTTMUSG00000000169</a> | 0.925 | -0.972 | 0.362679  | 0.634126 |
| 14528 | 10557975 | <a href="#">NM_133254</a>          | <a href="#">246787</a>    | solute carrier family 5 (sodiu     | <a href="#">Slc5a2</a>             | 0.925 | -0.783 | 0.458836  | 0.713797 |
| 14529 | 10519713 |                                    |                           |                                    |                                    | 0.925 | -1.25  | 0.250258  | 0.524321 |
| 14530 | 10487382 | <a href="#">NM_029629</a>          | <a href="#">68126</a>     | fumarylacetoacetate hydrolase      | <a href="#">Fahd2a</a>             | 0.925 | -0.721 | 0.493451  | 0.739076 |
| 14531 | 10347386 | <a href="#">NM_021383</a>          | <a href="#">58184</a>     | rcd1 (required for cell differ     | <a href="#">Rqcd1</a>              | 0.925 | -1.77  | 0.118866  | 0.344334 |
| 14532 | 10415159 | <a href="#">NM_153083</a>          | <a href="#">105663</a>    | thiamine triphosphatase            | <a href="#">Thtpa</a>              | 0.925 | -1.574 | 0.158174  | 0.405072 |
| 14533 | 10450451 | <a href="#">NM_020027</a>          | <a href="#">53761</a>     | HLA-B associated transcript 2      | <a href="#">Bat2</a>               | 0.925 | -1.92  | 0.0951351 | 0.299747 |
| 14534 | 10524353 | <a href="#">NM_018783</a>          | <a href="#">54723</a>     | tuftelin interacting protein 1     | <a href="#">Ttip11</a>             | 0.925 | -1.665 | 0.138671  | 0.376676 |
| 14535 | 10532574 | <a href="#">XM_912851</a>          | <a href="#">74376</a>     | myosin XVIIIb                      | <a href="#">Myo18b</a>             | 0.925 | -0.727 | 0.490202  | 0.737262 |
| 14536 | 10551666 | <a href="#">NM_008279</a>          | <a href="#">26411</a>     | mitogen-activated protein kina     | <a href="#">Map4k1</a>             | 0.925 | -0.978 | 0.359763  | 0.631744 |
| 14537 | 10459747 | <a href="#">NM_172632</a>          | <a href="#">225724</a>    | mitogen-activated protein kina     | <a href="#">Mapk4</a>              | 0.925 | -1.79  | 0.11528   | 0.337519 |
| 14538 | 10444802 | <a href="#">NM_010392</a>          | <a href="#">15013</a>     | histocompatibility 2, Q region     | <a href="#">H2-Q2</a>              | 0.924 | -0.774 | 0.463555  | 0.717736 |
| 14539 | 10589846 |                                    |                           |                                    |                                    | 0.924 | -0.478 | 0.646977  | 0.840859 |
| 14540 | 10523138 | <a href="#">NM_203320</a>          | <a href="#">330122</a>    | chemokine (C-X-C motif) ligand     | <a href="#">Cxcl3</a>              | 0.924 | -0.411 | 0.692929  | 0.865409 |
| 14541 | 10374060 | <a href="#">NM_023816</a>          | <a href="#">76389</a>     | ankyrin repeat domain 36           | <a href="#">Ankrd36</a>            | 0.924 | -1.286 | 0.238101  | 0.510486 |
| 14542 | 10436750 | <a href="#">ENSMUST00000009191</a> | <a href="#">546672</a>    | predicted gene, EG546672           | <a href="#">EG546672</a>           | 0.924 | -0.896 | 0.399318  | 0.665621 |
| 14543 | 10405751 |                                    |                           |                                    |                                    | 0.924 | -1.241 | 0.253409  | 0.527654 |
| 14544 | 10488439 | <a href="#">XR_034724</a>          | <a href="#">279056</a>    | similar to XPMC2 prevents mito     | <a href="#">LOC279056</a>          | 0.924 | -0.859 | 0.417959  | 0.680624 |
| 14545 | 10490984 |                                    |                           |                                    |                                    | 0.924 | -1.36  | 0.214921  | 0.481846 |
| 14546 | 10498367 | <a href="#">NM_028808</a>          | <a href="#">74191</a>     | purinergic receptor P2Y, G-pro     | <a href="#">P2ry13</a>             | 0.924 | -1.529 | 0.168967  | 0.420416 |
| 14547 | 10509526 | <a href="#">NM_010623</a>          | <a href="#">16559</a>     | kinesin family member 17           | <a href="#">Kif17</a>              | 0.924 | -1.207 | 0.265573  | 0.540607 |
| 14548 | 10432619 | <a href="#">NM_010127</a>          | <a href="#">19009</a>     | POU domain, class 6, transcrip     | <a href="#">Pou6f1</a>             | 0.924 | -1.159 | 0.283366  | 0.5587   |
| 14549 | 10366004 | <a href="#">NM_026482</a>          | <a href="#">67972</a>     | ATPase, Ca++ transporting, pla     | <a href="#">Atp2b1</a>             | 0.924 | -1.232 | 0.256497  | 0.530714 |
| 14550 | 10440621 | <a href="#">NM_146072</a>          | <a href="#">14805</a>     | glutamate receptor, ionotropic     | <a href="#">Grik1</a>              | 0.924 | -0.417 | 0.688864  | 0.863319 |
| 14551 | 10503264 | <a href="#">NM_009830</a>          | <a href="#">12448</a>     | cyclin E2                          | <a href="#">Ccne2</a>              | 0.924 | -1.626 | 0.146823  | 0.388752 |
| 14552 | 10444824 | <a href="#">NM_207648</a>          | <a href="#">110557</a>    | histocompatibility 2, Q region     | <a href="#">H2-Q6</a>              | 0.924 | -0.844 | 0.42565   | 0.687513 |
| 14553 | 10545804 | <a href="#">NM_001034902</a>       | <a href="#">545861</a>    | predicted gene, EG545861           | <a href="#">EG545861</a>           | 0.924 | -1.123 | 0.297443  | 0.573687 |
| 14554 | 10598573 | <a href="#">ENSMUST00000116161</a> | <a href="#">436193</a>    | predicted gene, EG436193           | <a href="#">EG436193</a>           | 0.924 | -0.564 | 0.589544  | 0.805725 |
| 14555 | 10540860 | <a href="#">NM_028835</a>          | <a href="#">74244</a>     | autophagy-related 7 (yeast)        | <a href="#">Atg7</a>               | 0.924 | -1.76  | 0.120542  | 0.346982 |
| 14556 | 10457225 | <a href="#">NM_007746</a>          | <a href="#">26410</a>     | mitogen-activated protein kina     | <a href="#">Map3k8</a>             | 0.924 | -0.873 | 0.410594  | 0.67498  |
| 14557 | 10525336 | <a href="#">BC120681</a>           | <a href="#">231717</a>    | RIKEN cDNA A230106M15<br>gene      | <a href="#">A230106M15Rik</a>      | 0.924 | -1.712 | 0.129314  | 0.360573 |
| 14558 | 10388225 |                                    |                           |                                    |                                    | 0.924 | -1.124 | 0.29704   | 0.573626 |
| 14559 | 10346191 | <a href="#">NM_009283</a>          | <a href="#">20846</a>     | signal transducer and activato     | <a href="#">Stat1</a>              | 0.924 | -2.209 | 0.061792  | 0.229738 |
| 14560 | 10544823 |                                    |                           |                                    |                                    | 0.924 | -0.873 | 0.41098   | 0.675081 |
| 14561 | 10529215 |                                    |                           |                                    |                                    | 0.924 | -0.826 | 0.435037  | 0.695306 |
| 14562 | 10471951 |                                    |                           |                                    |                                    | 0.924 | -1.138 | 0.291429  | 0.567505 |
| 14563 | 10450843 | <a href="#">NM_001115075</a>       | <a href="#">240095</a>    | histocompatibility 2, M region     | <a href="#">H2-M5</a>              | 0.924 | -0.859 | 0.418115  | 0.680624 |
| 14564 | 10515049 | <a href="#">AK042682</a>           | <a href="#">100049569</a> | predicted gene,<br>ENSMUSG0000005  | <a href="#">ENSMUSG00000053880</a> | 0.924 | -0.73  | 0.488291  | 0.735934 |
| 14565 | 10357239 | <a href="#">NM_019432</a>          | <a href="#">170706</a>    | transmembrane protein 37           | <a href="#">Tmem37</a>             | 0.924 | -1.079 | 0.315505  | 0.59239  |
| 14566 | 10448316 | <a href="#">ENSMUST00000062827</a> | <a href="#">320309</a>    | RIKEN cDNA 1520401A03<br>gene      | <a href="#">1520401A03Rik</a>      | 0.924 | -1.614 | 0.149386  | 0.39179  |
| 14567 | 10576873 | <a href="#">NM_010485</a>          | <a href="#">15568</a>     | ELAV (embryonic lethal,<br>abnorm  | <a href="#">Elavl1</a>             | 0.924 | -1.607 | 0.150756  | 0.394308 |
| 14568 | 10516221 | <a href="#">AK051152</a>           | <a href="#">442805</a>    | RIKEN cDNA D130007C19<br>gene      | <a href="#">D130007C19Rik</a>      | 0.924 | -0.925 | 0.384928  | 0.654157 |
| 14569 | 10561498 | <a href="#">BC094908</a>           | <a href="#">101744</a>    | RIKEN cDNA C330005M16<br>gene      | <a href="#">C330005M16Rik</a>      | 0.924 | -0.599 | 0.567675  | 0.792953 |
| 14570 | 10555921 | <a href="#">ENSMUST00000106805</a> | <a href="#">545989</a>    | predicted gene, EG545989           | <a href="#">EG545989</a>           | 0.924 | -1.399 | 0.203323  | 0.466186 |
| 14571 | 10426098 | <a href="#">NM_029720</a>          | <a href="#">76737</a>     | cysteine-rich with EGF-like do     | <a href="#">Crelld2</a>            | 0.924 | -2.022 | 0.08166   | 0.272831 |
| 14572 | 10404904 | <a href="#">NM_001081425</a>       | <a href="#">666794</a>    | RNA binding motif protein 24       | <a href="#">Rbm24</a>              | 0.924 | -0.838 | 0.428941  | 0.689875 |

|       |          |                                    |                           |                                |                                    |       |        |           |          |
|-------|----------|------------------------------------|---------------------------|--------------------------------|------------------------------------|-------|--------|-----------|----------|
| 14573 | 10386123 | <a href="#">XR_034114</a>          | <a href="#">676530</a>    | hypothetical protein LOC676530 | <a href="#">LOC676530</a>          | 0.924 | -0.676 | 0.520163  | 0.757722 |
| 14574 | 10353272 | <a href="#">NM_001111271</a>       | <a href="#">29819</a>     | stauflen (RNA binding protein) | <a href="#">Stau2</a>              | 0.924 | -1.538 | 0.166623  | 0.417525 |
| 14575 | 10525854 | <a href="#">ENSMUST00000037065</a> | <a href="#">56087</a>     | dynein, axonemal, heavy chain  | <a href="#">Dnahe10</a>            | 0.924 | -0.824 | 0.436406  | 0.6963   |
| 14576 | 10459405 | <a href="#">NM_027350</a>          | <a href="#">70223</a>     | asparaginyl-tRNA synthetase    | <a href="#">Nars</a>               | 0.924 | -2.118 | 0.0708258 | 0.249798 |
| 14577 | 10488437 | <a href="#">ENSMUST00000099264</a> | <a href="#">319470</a>    | RIKEN cDNA C530025M09 gene     | <a href="#">C530025M09Rik</a>      | 0.924 | -0.944 | 0.375795  | 0.645831 |
| 14578 | 10564960 | <a href="#">NM_011046</a>          | <a href="#">18550</a>     | furin (paired basic amino acid | <a href="#">Furin</a>              | 0.924 | -1.906 | 0.0970817 | 0.303474 |
| 14579 | 10581560 | <a href="#">NM_010817</a>          | <a href="#">17463</a>     | proteasome (prosome, macropain | <a href="#">Psmc7</a>              | 0.924 | -1.531 | 0.168406  | 0.419736 |
| 14580 | 10479423 | <a href="#">NM_009936</a>          | <a href="#">12841</a>     | collagen, type IX, alpha 3     | <a href="#">Col9a3</a>             | 0.924 | -0.832 | 0.432254  | 0.692602 |
| 14581 | 10369409 | <a href="#">ENSMUST00000036304</a> | <a href="#">73616</a>     | RIKEN cDNA 1700125F08 gene     | <a href="#">1700125F08Rik</a>      | 0.924 | -1.06  | 0.323463  | 0.599986 |
| 14582 | 10499514 | <a href="#">NM_183037</a>          | <a href="#">360213</a>    | tripartite motif-containing 46 | <a href="#">Trim46</a>             | 0.924 | -0.619 | 0.55515   | 0.783898 |
| 14583 | 10443459 | <a href="#">NM_013663</a>          | <a href="#">20383</a>     | splicing factor, arginine/seri | <a href="#">Sfrs3</a>              | 0.924 | -2.24  | 0.0589811 | 0.22351  |
| 14584 | 10556321 | <a href="#">NM_009431</a>          | <a href="#">22083</a>     | Ctr9, Paf1/RNA polymerase II c | <a href="#">Ctr9</a>               | 0.924 | -1.625 | 0.146826  | 0.388752 |
| 14585 | 10576854 | <a href="#">NM_183315</a>          | <a href="#">330695</a>    | cortexin 1                     | <a href="#">Ctxn1</a>              | 0.924 | -1.073 | 0.31798   | 0.595147 |
| 14586 | 10418434 | <a href="#">NM_008407</a>          | <a href="#">16426</a>     | inter-alpha trypsin inhibitor, | <a href="#">Itih3</a>              | 0.924 | -1.637 | 0.144455  | 0.385726 |
| 14587 | 10524659 | <a href="#">NM_026398</a>          | <a href="#">117109</a>    | processing of precursor 5, rib | <a href="#">Pop5</a>               | 0.924 | -2.219 | 0.0608774 | 0.227701 |
| 14588 | 10563780 | <a href="#">NM_001013368</a>       | <a href="#">108961</a>    | E2F transcription factor 8     | <a href="#">E2f8</a>               | 0.924 | -1.506 | 0.174427  | 0.427379 |
| 14589 | 10444997 | <a href="#">BC092081</a>           | <a href="#">637119</a>    | RIKEN cDNA 2410017117 gene     | <a href="#">2410017117Rik</a>      | 0.924 | -0.987 | 0.355809  | 0.628276 |
| 14590 | 10364529 | <a href="#">NM_011178</a>          | <a href="#">19152</a>     | proteinase 3                   | <a href="#">Prtn3</a>              | 0.924 | -1.421 | 0.197041  | 0.457727 |
| 14591 | 10463716 | <a href="#">NM_033569</a>          | <a href="#">94219</a>     | cyclin M2                      | <a href="#">Cnm2</a>               | 0.924 | -1.184 | 0.273848  | 0.548502 |
| 14592 | 10380392 | <a href="#">AB045721</a>           | <a href="#">217116</a>    | spermatogenesis associated 20  | <a href="#">Spata20</a>            | 0.924 | -0.794 | 0.452299  | 0.708922 |
| 14593 | 10411274 | <a href="#">BC132111</a>           | <a href="#">75209</a>     | synaptic vesicle glycoprotein  | <a href="#">Sv2c</a>               | 0.924 | -1.208 | 0.265242  | 0.5404   |
| 14594 | 10571741 |                                    |                           |                                |                                    | 0.924 | -1.45  | 0.189022  | 0.447306 |
| 14595 | 10381666 | <a href="#">AK013898</a>           | <a href="#">68087</a>     | dephospho-CoA kinase domain co | <a href="#">Dcakd</a>              | 0.924 | -1.277 | 0.241211  | 0.514029 |
| 14596 | 10368092 | <a href="#">NM_019487</a>          | <a href="#">56016</a>     | heme binding protein 2         | <a href="#">Hebp2</a>              | 0.924 | -2.023 | 0.0816115 | 0.272821 |
| 14597 | 10569222 | <a href="#">AK016549</a>           | <a href="#">100036523</a> | predicted gene, ENSMUSG0000003 | <a href="#">ENSMUSG00000038461</a> | 0.924 | -0.812 | 0.442762  | 0.701414 |
| 14598 | 10409031 | <a href="#">NM_025900</a>          | <a href="#">110052</a>    | DEK oncogene (DNA binding)     | <a href="#">Dek</a>                | 0.924 | -1.733 | 0.125424  | 0.354707 |
| 14599 | 10581573 |                                    |                           |                                |                                    | 0.924 | -0.919 | 0.387968  | 0.656721 |
| 14600 | 10597627 | <a href="#">NM_133985</a>          | <a href="#">108737</a>    | oxidative-stress responsive 1  | <a href="#">Oxsr1</a>              | 0.924 | -2.266 | 0.0567471 | 0.217919 |
| 14601 | 10586816 | <a href="#">NM_025690</a>          | <a href="#">66660</a>     | SAFB-like, transcription modul | <a href="#">Sltm</a>               | 0.924 | -2.183 | 0.0642562 | 0.235643 |
| 14602 | 10390498 | <a href="#">NM_028156</a>          | <a href="#">72215</a>     | RIKEN cDNA 1700001P01 gene     | <a href="#">1700001P01Rik</a>      | 0.924 | -0.101 | 0.922397  | 0.969068 |
| 14603 | 10555389 | <a href="#">NM_011671</a>          | <a href="#">22228</a>     | uncoupling protein 2 (mitochon | <a href="#">Ucp2</a>               | 0.924 | -1.458 | 0.186861  | 0.445172 |
| 14604 | 10575662 | <a href="#">NM_173015</a>          | <a href="#">270096</a>    | MON1 homolog b (yeast)         | <a href="#">Mon1b</a>              | 0.924 | -1.233 | 0.256404  | 0.530714 |
| 14605 | 10429699 | <a href="#">NM_134089</a>          | <a href="#">105782</a>    | scribbled homolog (Drosophila) | <a href="#">Scrib</a>              | 0.924 | -1.605 | 0.151358  | 0.395197 |
| 14606 | 10460255 | <a href="#">AK081788</a>           | <a href="#">73458</a>     | RIKEN cDNA 1700055N04 gene     | <a href="#">1700055N04Rik</a>      | 0.924 | -1.031 | 0.335775  | 0.611352 |
| 14607 | 10353002 |                                    |                           |                                |                                    | 0.923 | -1.048 | 0.32859   | 0.604982 |
| 14608 | 10358711 |                                    |                           |                                |                                    | 0.923 | -0.523 | 0.616972  | 0.823029 |
| 14609 | 10374068 | <a href="#">NM_013810</a>          | <a href="#">13169</a>     | drebrin-like                   | <a href="#">Dbnl</a>               | 0.923 | -1.377 | 0.209709  | 0.474741 |
| 14610 | 10381695 |                                    |                           |                                |                                    | 0.923 | 0.081  | 0.937973  | 0.975903 |
| 14611 | 10424743 | <a href="#">NM_178646</a>          | <a href="#">105734</a>    | tigger transposable element de | <a href="#">Tigd5</a>              | 0.923 | -1.537 | 0.16686   | 0.417832 |
| 14612 | 10413180 | <a href="#">ENSMUST00000038250</a> | <a href="#">70955</a>     | RIKEN cDNA 4931403M11 gene     | <a href="#">4931403M11Rik</a>      | 0.923 | -1.219 | 0.261226  | 0.535766 |
| 14613 | 10441706 | <a href="#">NM_025851</a>          | <a href="#">66931</a>     | RIKEN cDNA 1700010I14 gene     | <a href="#">1700010I14Rik</a>      | 0.923 | -0.68  | 0.517869  | 0.756834 |
| 14614 | 10386756 |                                    |                           |                                |                                    | 0.923 | -0.657 | 0.531559  | 0.765775 |
| 14615 | 10557285 | <a href="#">NM_025304</a>          | <a href="#">30949</a>     | leucine carboxyl methyltransfe | <a href="#">Lcmt1</a>              | 0.923 | -2.2   | 0.0626287 | 0.231629 |
| 14616 | 10449654 | <a href="#">ENSMUST00000097355</a> | <a href="#">100038436</a> | predicted gene, ENSMUSG0000007 | <a href="#">ENSMUSG00000073427</a> | 0.923 | -0.837 | 0.429314  | 0.690297 |
| 14617 | 10581499 | <a href="#">NM_145412</a>          | <a href="#">214987</a>    | RIKEN cDNA 5830457O10 gene     | <a href="#">5830457O10Rik</a>      | 0.923 | -1.597 | 0.153019  | 0.397035 |
| 14618 | 10352439 | <a href="#">NM_144796</a>          | <a href="#">96935</a>     | sushi domain containing 4      | <a href="#">Susd4</a>              | 0.923 | -0.657 | 0.531297  | 0.765579 |
| 14619 | 10439830 |                                    |                           |                                |                                    | 0.923 | -0.353 | 0.733942  | 0.886263 |
| 14620 | 10452172 | <a href="#">NM_001039114</a>       | <a href="#">328845</a>    | acyl-CoA synthetase bubblegum  | <a href="#">Acsbg2</a>             | 0.923 | -0.844 | 0.426037  | 0.687748 |
| 14621 | 10481835 | <a href="#">NM_010725</a>          | <a href="#">16917</a>     | LIM homeobox transcription fac | <a href="#">Lmx1b</a>              | 0.923 | -0.946 | 0.374949  | 0.644967 |
| 14622 | 10597352 |                                    |                           |                                |                                    | 0.923 | -0.465 | 0.655897  | 0.846006 |
| 14623 | 10502791 | <a href="#">NM_133871</a>          | <a href="#">99899</a>     | interferon-induced protein 44  | <a href="#">Ifi44</a>              | 0.923 | -1.107 | 0.303648  | 0.579864 |

|       |          |                                    |                           |                                |                                    |       |        |           |          |
|-------|----------|------------------------------------|---------------------------|--------------------------------|------------------------------------|-------|--------|-----------|----------|
| 14624 | 10437639 | <a href="#">NM_007929</a>          | <a href="#">13731</a>     | epithelial membrane protein 2  | <a href="#">Emp2</a>               | 0.923 | -0.785 | 0.457213  | 0.712928 |
| 14625 | 10567454 | <a href="#">XM_355934</a>          | <a href="#">381917</a>    | dynein, axonemal, heavy chain  | <a href="#">Dnahc3</a>             | 0.923 | -1.619 | 0.148263  | 0.390488 |
| 14626 | 10546557 | <a href="#">NM_177233</a>          | <a href="#">320701</a>    | RIKEN cDNA C130034I18 gene     | <a href="#">C130034I18Rik</a>      | 0.923 | -1.019 | 0.341254  | 0.616096 |
| 14627 | 10473505 | <a href="#">NM_146406</a>          | <a href="#">258401</a>    | olfactory receptor 1076        | <a href="#">Olfir1076</a>          | 0.923 | -0.22  | 0.831907  | 0.932604 |
| 14628 | 10443000 | <a href="#">NM_001081656</a>       | <a href="#">240055</a>    | predicted gene, EG240055       | <a href="#">EG240055</a>           | 0.923 | -0.806 | 0.446175  | 0.704033 |
| 14629 | 10559377 | <a href="#">NM_028184</a>          | <a href="#">72284</a>     | oral cancer overexpressed 1    | <a href="#">Oraov1</a>             | 0.923 | -1.612 | 0.149737  | 0.392417 |
| 14630 | 10400052 | <a href="#">BC118038</a>           | <a href="#">75847</a>     | RIKEN cDNA 4930579E17 gene     | <a href="#">4930579E17Rik</a>      | 0.923 | -1.473 | 0.183012  | 0.439827 |
| 14631 | 10576556 |                                    |                           |                                |                                    | 0.923 | -0.356 | 0.731846  | 0.884439 |
| 14632 | 10471216 | <a href="#">NM_011836</a>          | <a href="#">23928</a>     | laminin gamma 3                | <a href="#">Lamc3</a>              | 0.923 | -0.802 | 0.448067  | 0.705745 |
| 14633 | 10560702 | <a href="#">NM_177036</a>          | <a href="#">319930</a>    | CEA-related cell adhesion mole | <a href="#">Ceacam19</a>           | 0.923 | -0.541 | 0.605127  | 0.815765 |
| 14634 | 10355037 | <a href="#">NM_021312</a>          | <a href="#">57750</a>     | WD repeat domain 12            | <a href="#">Wdr12</a>              | 0.923 | -2.476 | 0.0414641 | 0.177622 |
| 14635 | 10600823 | <a href="#">ENSMUST00000116173</a> | <a href="#">675747</a>    | hypothetical protein LOC675747 | <a href="#">LOC675747</a>          | 0.923 | -0.835 | 0.430253  | 0.691063 |
| 14636 | 10517067 | <a href="#">NM_018754</a>          | <a href="#">55948</a>     | stratifin                      | <a href="#">Sfn</a>                | 0.923 | -1.029 | 0.336677  | 0.612455 |
| 14637 | 10399874 | <a href="#">NM_007530</a>          | <a href="#">12033</a>     | B-cell receptor-associated pro | <a href="#">Bcap29</a>             | 0.923 | -2.396 | 0.0467314 | 0.192011 |
| 14638 | 10486102 | <a href="#">NM_201367</a>          | <a href="#">381413</a>    | G protein-coupled receptor 176 | <a href="#">Gpr176</a>             | 0.923 | -0.755 | 0.474287  | 0.725796 |
| 14639 | 10552258 |                                    |                           |                                |                                    | 0.923 | -1.56  | 0.161392  | 0.409613 |
| 14640 | 10562696 | <a href="#">BC132158</a>           | <a href="#">74054</a>     | RIKEN cDNA 4931406B18 gene     | <a href="#">4931406B18Rik</a>      | 0.923 | -0.603 | 0.564905  | 0.790912 |
| 14641 | 10585169 | <a href="#">NM_010077</a>          | <a href="#">13489</a>     | dopamine receptor 2            | <a href="#">Drd2</a>               | 0.923 | -0.984 | 0.356998  | 0.629293 |
| 14642 | 10415693 | <a href="#">NM_145463</a>          | <a href="#">219134</a>    | shisa homolog 2 (Xenopus laevi | <a href="#">Shisa2</a>             | 0.923 | -2.01  | 0.0832258 | 0.27639  |
| 14643 | 10376092 |                                    |                           |                                |                                    | 0.923 | -1.148 | 0.287621  | 0.563359 |
| 14644 | 10570308 | <a href="#">NM_025834</a>          | <a href="#">66901</a>     | protein Z, vitamin K-dependent | <a href="#">Proz</a>               | 0.923 | -0.9   | 0.397175  | 0.664239 |
| 14645 | 10452210 | <a href="#">NM_008854</a>          | <a href="#">19197</a>     | persephin                      | <a href="#">Pspn</a>               | 0.923 | -0.69  | 0.51154   | 0.752366 |
| 14646 | 10448389 | <a href="#">NM_001081399</a>       | <a href="#">355130</a>    | protease, serine, 33           | <a href="#">Pss33</a>              | 0.923 | -0.834 | 0.310961  | 0.691869 |
| 14647 | 10526952 | <a href="#">NM_029771</a>          | <a href="#">76854</a>     | G protein-coupled estrogen rec | <a href="#">Gper</a>               | 0.923 | -0.598 | 0.568077  | 0.793199 |
| 14648 | 10381170 | <a href="#">ENSMUST0000017976</a>  | <a href="#">75482</a>     | heat shock protein, alpha-crys | <a href="#">Hspb9</a>              | 0.923 | -1.104 | 0.3051    | 0.581502 |
| 14649 | 10366803 | <a href="#">NM_010009</a>          | <a href="#">13115</a>     | cytochrome P450, family 27, su | <a href="#">Cyp27b1</a>            | 0.923 | -0.76  | 0.471124  | 0.722944 |
| 14650 | 10397750 | <a href="#">ENSMUST00000101131</a> | <a href="#">100038378</a> | predicted gene, ENSMUSG0000007 | <a href="#">ENSMUSG00000072884</a> | 0.923 | -0.782 | 0.459142  | 0.714041 |
| 14651 | 10529313 | <a href="#">NM_019694</a>          | <a href="#">56384</a>     | leucine zipper-EF-hand contain | <a href="#">Letm1</a>              | 0.923 | -1.283 | 0.239341  | 0.51221  |
| 14652 | 10413461 | <a href="#">NM_177814</a>          | <a href="#">238988</a>    | ELKS/RAB6-interacting/CAST fam | <a href="#">Erc2</a>               | 0.923 | -1.265 | 0.24517   | 0.518285 |
| 14653 | 10598216 |                                    |                           |                                |                                    | 0.923 | -0.821 | 0.438045  | 0.697167 |
| 14654 | 10448916 | <a href="#">NM_031187</a>          | <a href="#">17230</a>     | tryptase alpha/beta 1          | <a href="#">Tpsab1</a>             | 0.923 | -0.987 | 0.355707  | 0.628274 |
| 14655 | 10510482 | <a href="#">NM_023051</a>          | <a href="#">65945</a>     | calsyntenin 1                  | <a href="#">Clstn1</a>             | 0.923 | -1.708 | 0.13009   | 0.36185  |
| 14656 | 10504636 |                                    |                           |                                |                                    | 0.923 | -0.949 | 0.373445  | 0.643632 |
| 14657 | 10412555 | <a href="#">AK007001</a>           | <a href="#">73498</a>     | RIKEN cDNA 1700084P21 gene     | <a href="#">1700084P21Rik</a>      | 0.923 | -0.791 | 0.454232  | 0.710744 |
| 14658 | 10539606 | <a href="#">NM_007638</a>          | <a href="#">12468</a>     | chaperonin subunit 7 (eta)     | <a href="#">Cct7</a>               | 0.923 | -2.292 | 0.0545865 | 0.21288  |
| 14659 | 10443749 | <a href="#">NM_177823</a>          | <a href="#">328795</a>    | ubiquitin associated and SH3 d | <a href="#">Ubash3a</a>            | 0.923 | -1.136 | 0.292467  | 0.568688 |
| 14660 | 10557925 | <a href="#">ENSMUST00000106237</a> | <a href="#">381924</a>    | integrin, alpha D              | <a href="#">Itgad</a>              | 0.923 | -1.065 | 0.321199  | 0.598048 |
| 14661 | 10525030 | <a href="#">NM_011537</a>          | <a href="#">21388</a>     | T-box 5                        | <a href="#">Tbx5</a>               | 0.923 | -1.122 | 0.297641  | 0.573736 |
| 14662 | 10492660 |                                    |                           |                                |                                    | 0.923 | -0.789 | 0.455457  | 0.711765 |
| 14663 | 10442683 | <a href="#">BC107381</a>           | <a href="#">68509</a>     | RIKEN cDNA 1110018H23 gene     | <a href="#">1110018H23Rik</a>      | 0.923 | -0.49  | 0.6385    | 0.835923 |
| 14664 | 10512065 | <a href="#">XR_033416</a>          | <a href="#">621880</a>    | similar to PDZ binding kinase  | <a href="#">LOC621880</a>          | 0.923 | -0.567 | 0.588169  | 0.804936 |
| 14665 | 10433340 | <a href="#">ENSMUST00000090457</a> | <a href="#">74684</a>     | RIKEN cDNA 4930451G09 gene     | <a href="#">4930451G09Rik</a>      | 0.923 | -1.526 | 0.169558  | 0.420889 |
| 14666 | 10432986 | <a href="#">NM_153416</a>          | <a href="#">223921</a>    | achalasia, adrenocortical insu | <a href="#">Aaas</a>               | 0.922 | -1.155 | 0.285059  | 0.560366 |
| 14667 | 10449051 | <a href="#">NM_019719</a>          | <a href="#">56424</a>     | STIP1 homology and U-Box conta | <a href="#">Stub1</a>              | 0.922 | -2.237 | 0.059229  | 0.224032 |
| 14668 | 10488748 | <a href="#">NM_025876</a>          | <a href="#">66971</a>     | CDK5 regulatory subunit associ | <a href="#">Cdk5rap1</a>           | 0.922 | -0.775 | 0.462951  | 0.717432 |
| 14669 | 10395005 | <a href="#">NM_001081378</a>       | <a href="#">77480</a>     | RIKEN cDNA C330002I19 gene     | <a href="#">C330002I19Rik</a>      | 0.922 | -1.484 | 0.180033  | 0.435501 |
| 14670 | 10442052 | <a href="#">AK164331</a>           | <a href="#">626854</a>    | predicted gene, EG626854       | <a href="#">EG626854</a>           | 0.922 | -0.342 | 0.741835  | 0.889893 |
| 14671 | 10416332 | <a href="#">AK081168</a>           | <a href="#">791332</a>    | predicted gene, ENSMUSG0000003 | <a href="#">ENSMUSG00000030810</a> | 0.922 | -0.973 | 0.361921  | 0.633538 |
| 14672 | 10370777 | <a href="#">NM_025521</a>          | <a href="#">66374</a>     | RIKEN cDNA 2310011J03 gene     | <a href="#">2310011J03Rik</a>      | 0.922 | -1.063 | 0.322172  | 0.598962 |
| 14673 | 10581940 | <a href="#">NM_053092</a>          | <a href="#">85305</a>     | lysyl-tRNA synthetase          | <a href="#">Kars</a>               | 0.922 | -1.852 | 0.105191  | 0.319429 |
| 14674 | 10369474 | <a href="#">NM_010124</a>          | <a href="#">13688</a>     | eukaryotic translation initiat | <a href="#">Eif4ebp2</a>           | 0.922 | -0.924 | 0.385191  | 0.654386 |

|       |          |                                    |                        |                                |                               |       |        |           |          |
|-------|----------|------------------------------------|------------------------|--------------------------------|-------------------------------|-------|--------|-----------|----------|
| 14675 | 10531950 |                                    |                        |                                |                               | 0.922 | -0.597 | 0.569033  | 0.793724 |
| 14676 | 10480579 | <a href="#">NM_001031808</a>       | <a href="#">107733</a> | mitochondrial ribosomal protei | <a href="#">Mrpl41</a>        | 0.922 | -1.765 | 0.119713  | 0.346027 |
| 14677 | 10502029 | <a href="#">NM_138593</a>          | <a href="#">28036</a>  | La ribonucleoprotein domain fa | <a href="#">Larp7</a>         | 0.922 | -2.292 | 0.0546    | 0.21288  |
| 14678 | 10542842 | <a href="#">NM_025911</a>          | <a href="#">67015</a>  | coiled-coil domain containing  | <a href="#">Ccdc91</a>        | 0.922 | -1.499 | 0.176189  | 0.429929 |
| 14679 | 10594315 | <a href="#">NM_010193</a>          | <a href="#">14155</a>  | feminization 1 homolog b (C. e | <a href="#">Fem1b</a>         | 0.922 | -2.222 | 0.0606078 | 0.227054 |
| 14680 | 10543572 | <a href="#">NM_011829</a>          | <a href="#">23917</a>  | inosine 5'-phosphate dehydroge | <a href="#">Impdh1</a>        | 0.922 | -1.733 | 0.1255    | 0.354754 |
| 14681 | 10453006 | <a href="#">NM_001024806</a>       | <a href="#">12607</a>  | CCAAT/enhancer binding protein | <a href="#">Cebpz</a>         | 0.922 | -1.905 | 0.0972389 | 0.303696 |
| 14682 | 10574897 | <a href="#">NM_021513</a>          | <a href="#">59016</a>  | THAP domain containing 11      | <a href="#">Thap11</a>        | 0.922 | -1.729 | 0.126224  | 0.355752 |
| 14683 | 10421488 | <a href="#">NM_207636</a>          | <a href="#">319448</a> | fibronectin type III domain co | <a href="#">Fndc3a</a>        | 0.922 | -1.917 | 0.0954758 | 0.300369 |
| 14684 | 10604850 |                                    |                        |                                |                               | 0.922 | -1.342 | 0.220304  | 0.488992 |
| 14685 | 10542875 | <a href="#">BC106181</a>           | <a href="#">109163</a> | RIKEN cDNA 3010003L21 gene     | <a href="#">3010003L21Rik</a> | 0.922 | -0.611 | 0.559657  | 0.787057 |
| 14686 | 10354275 | <a href="#">BC119032</a>           | <a href="#">75623</a>  | RIKEN cDNA 1700029F09 gene     | <a href="#">1700029F09Rik</a> | 0.922 | -2.286 | 0.0550819 | 0.214169 |
| 14687 | 10417676 | <a href="#">NM_025435</a>          | <a href="#">66231</a>  | THO complex 7 homolog (Drosoph | <a href="#">Thoc7</a>         | 0.922 | -2.331 | 0.051502  | 0.205    |
| 14688 | 10586611 |                                    |                        |                                |                               | 0.922 | -0.637 | 0.543795  | 0.775948 |
| 14689 | 10524034 | <a href="#">NM_008325</a>          | <a href="#">15932</a>  | iduronidase, alpha-L-          | <a href="#">Idua</a>          | 0.922 | -1.413 | 0.199404  | 0.461039 |
| 14690 | 10364814 | <a href="#">NM_019575</a>          | <a href="#">56214</a>  | secretory carrier membrane pro | <a href="#">Scamp4</a>        | 0.922 | -0.726 | 0.490782  | 0.737375 |
| 14691 | 10577070 | <a href="#">NM_198031</a>          | <a href="#">259279</a> | tubulin, gamma complex associa | <a href="#">Tubgcp3</a>       | 0.922 | -1.622 | 0.147542  | 0.389587 |
| 14692 | 10420071 | <a href="#">NM_028780</a>          | <a href="#">74140</a>  | transmembrane 9 superfamily me | <a href="#">Tm9sfl</a>        | 0.922 | -2.232 | 0.0596987 | 0.225162 |
| 14693 | 10454701 | <a href="#">NM_009290</a>          | <a href="#">20890</a>  | wingless-related MMTV integrat | <a href="#">Wnt8a</a>         | 0.922 | -0.884 | 0.405193  | 0.669695 |
| 14694 | 10460585 | <a href="#">NM_010235</a>          | <a href="#">14283</a>  | fos-like antigen 1             | <a href="#">Fosl1</a>         | 0.922 | -1.133 | 0.293342  | 0.569485 |
| 14695 | 10500293 |                                    |                        |                                |                               | 0.922 | -0.718 | 0.495343  | 0.740179 |
| 14696 | 10494924 | <a href="#">NM_053170</a>          | <a href="#">94093</a>  | tripartite motif-containing 33 | <a href="#">Trim33</a>        | 0.922 | -1.682 | 0.135246  | 0.370739 |
| 14697 | 10396112 | <a href="#">NM_026536</a>          | <a href="#">68055</a>  | ATP synthase, H+ transporting, | <a href="#">Atp5s</a>         | 0.922 | -1.481 | 0.180907  | 0.436804 |
| 14698 | 10471072 | <a href="#">NM_133673</a>          | <a href="#">30934</a>  | torsin family 1, member B      | <a href="#">Tor1b</a>         | 0.922 | -1.861 | 0.103742  | 0.316662 |
| 14699 | 10487321 | <a href="#">NM_023220</a>          | <a href="#">66552</a>  | RIKEN cDNA 2010106G01 gene     | <a href="#">2010106G01Rik</a> | 0.922 | -1.632 | 0.145496  | 0.387083 |
| 14700 | 10473261 | <a href="#">ENSMUST00000099963</a> | <a href="#">241516</a> | fibrous sheath-interacting pro | <a href="#">Fsip2</a>         | 0.922 | -1.532 | 0.168105  | 0.4195   |
| 14701 | 10484646 |                                    |                        |                                |                               | 0.922 | -0.384 | 0.712235  | 0.873926 |
| 14702 | 10509049 | <a href="#">BC059720</a>           | <a href="#">73937</a>  | RIKEN cDNA 1700029M20 gene     | <a href="#">1700029M20Rik</a> | 0.922 | -0.774 | 0.463439  | 0.717662 |
| 14703 | 10356626 |                                    |                        |                                |                               | 0.922 | -0.482 | 0.644415  | 0.839112 |
| 14704 | 10386582 | <a href="#">NM_009410</a>          | <a href="#">21975</a>  | topoisomerase (DNA) III alpha  | <a href="#">Top3a</a>         | 0.922 | -1.402 | 0.202468  | 0.465275 |
| 14705 | 10545192 | <a href="#">NR_004434</a>          | <a href="#">19783</a>  | ribonuclease P RNA-like 1      | <a href="#">Rprl1</a>         | 0.922 | -0.884 | 0.404996  | 0.669624 |
| 14706 | 10463448 | <a href="#">NM_153796</a>          | <a href="#">226153</a> | progressive external ophthalmo | <a href="#">Peo1</a>          | 0.922 | -1.621 | 0.147751  | 0.389922 |
| 14707 | 10398436 |                                    |                        |                                |                               | 0.922 | -1.237 | 0.254743  | 0.528967 |
| 14708 | 10599377 | <a href="#">NM_021465</a>          | <a href="#">20843</a>  | stromal antigen 2              | <a href="#">Stag2</a>         | 0.922 | -1.762 | 0.120211  | 0.346569 |
| 14709 | 10451580 | <a href="#">NM_016859</a>          | <a href="#">53414</a>  | bystin-like                    | <a href="#">Bysl</a>          | 0.922 | -1.169 | 0.279418  | 0.554692 |
| 14710 | 10499639 | <a href="#">NM_016904</a>          | <a href="#">54124</a>  | CDC28 protein kinase 1b        | <a href="#">Cks1b</a>         | 0.922 | -1.623 | 0.147413  | 0.389587 |
| 14711 | 10394778 | <a href="#">NM_016677</a>          | <a href="#">53602</a>  | hippocalcin-like 1             | <a href="#">Hpcal1</a>        | 0.922 | -1.626 | 0.146762  | 0.388752 |
| 14712 | 10462276 | <a href="#">NM_001033407</a>       | <a href="#">329047</a> | gene model 815, (NCBI)         | <a href="#">Gm815</a>         | 0.922 | -0.519 | 0.619588  | 0.824972 |
| 14713 | 10440770 | <a href="#">NM_178923</a>          | <a href="#">224432</a> | splicing factor, arginine/seri | <a href="#">Sfrs15</a>        | 0.922 | -1.54  | 0.166311  | 0.417188 |
| 14714 | 10390895 | <a href="#">ENSMUST00000055502</a> | <a href="#">69473</a>  | keratin associated protein 3-1 | <a href="#">Krtap3-1</a>      | 0.922 | -1.207 | 0.265568  | 0.540607 |
| 14715 | 10516333 | <a href="#">NM_011902</a>          | <a href="#">24084</a>  | tektin 2                       | <a href="#">Tek2</a>          | 0.922 | -0.743 | 0.480915  | 0.730572 |
| 14716 | 10550527 | <a href="#">NM_178757</a>          | <a href="#">272359</a> | interferon regulatory factor 2 | <a href="#">Irf2bp1</a>       | 0.922 | -1.72  | 0.127914  | 0.358671 |
| 14717 | 10447938 | <a href="#">NM_172826</a>          | <a href="#">240025</a> | dapper homolog 2, antagonist o | <a href="#">Dact2</a>         | 0.922 | -1.191 | 0.271405  | 0.546126 |
| 14718 | 10381653 | <a href="#">NM_028492</a>          | <a href="#">73293</a>  | coiled-coil domain containing  | <a href="#">Ccdc103</a>       | 0.922 | -1.495 | 0.177426  | 0.431801 |
| 14719 | 10378429 | <a href="#">NM_146708</a>          | <a href="#">258703</a> | olfactory receptor 402         | <a href="#">Olfr402</a>       | 0.922 | -0.25  | 0.809929  | 0.923287 |
| 14720 | 10399586 | <a href="#">AJ005350</a>           | <a href="#">22651</a>  | zinc finger protein 125        | <a href="#">Zfp125</a>        | 0.922 | -1.433 | 0.19373   | 0.453274 |
| 14721 | 10405749 |                                    |                        |                                |                               | 0.922 | -0.366 | 0.725131  | 0.880804 |
| 14722 | 10378216 | <a href="#">NM_016745</a>          | <a href="#">53313</a>  | ATPase, Ca++ transporting, ubi | <a href="#">Atp2a3</a>        | 0.921 | -0.931 | 0.382101  | 0.651596 |
| 14723 | 10557455 |                                    |                        |                                |                               | 0.921 | -1.351 | 0.217537  | 0.485293 |
| 14724 | 10538377 | <a href="#">XM_620310</a>          | <a href="#">330319</a> | WAS/WASL interacting protein f | <a href="#">Wipf3</a>         | 0.921 | -1.191 | 0.27125   | 0.545988 |
| 14725 | 10537567 | <a href="#">X00438</a>             | <a href="#">21580</a>  | T-cell receptor beta, joining  | <a href="#">Tcrb-J</a>        | 0.921 | -1.278 | 0.240784  | 0.513737 |
| 14726 | 10551848 | <a href="#">ENSMUST00000014072</a> | <a href="#">75629</a>  | THAP domain containing 8       | <a href="#">Thap8</a>         | 0.921 | -0.335 | 0.746999  | 0.892497 |
| 14727 | 10474950 | <a href="#">NM_172269</a>          | <a href="#">228545</a> | vacuolar protein sorting 18 (y | <a href="#">Vps18</a>         | 0.921 | -1.1   | 0.306508  | 0.582999 |

|       |          |                                    |                           |                                |                                    |       |        |           |          |
|-------|----------|------------------------------------|---------------------------|--------------------------------|------------------------------------|-------|--------|-----------|----------|
| 14728 | 10361267 |                                    |                           |                                |                                    | 0.921 | -0.714 | 0.497791  | 0.741949 |
| 14729 | 10532598 | <a href="#">ENSMUST00000086617</a> | <a href="#">74376</a>     | myosin XVIIIb                  | <a href="#">Myo18b</a>             | 0.921 | -0.983 | 0.357446  | 0.629873 |
| 14730 | 10447125 |                                    |                           |                                |                                    | 0.921 | -1.139 | 0.291307  | 0.567423 |
| 14731 | 10465045 | <a href="#">NM_024176</a>          | <a href="#">66556</a>     | Dr1 associated protein 1 (nega | <a href="#">Drap1</a>              | 0.921 | -1.915 | 0.0958239 | 0.301049 |
| 14732 | 10394858 |                                    |                           |                                |                                    | 0.921 | -0.861 | 0.416707  | 0.679627 |
| 14733 | 10438308 | <a href="#">NM_011239</a>          | <a href="#">19385</a>     | RAN binding protein 1          | <a href="#">Ranbp1</a>             | 0.921 | -1.637 | 0.144483  | 0.385726 |
| 14734 | 10540298 | <a href="#">NM_007697</a>          | <a href="#">12661</a>     | cell adhesion molecule with ho | <a href="#">Chl1</a>               | 0.921 | -1.166 | 0.280597  | 0.555987 |
| 14735 | 10380067 | <a href="#">NM_011129</a>          | <a href="#">18952</a>     | septin 4                       | <a href="#">Sept4</a>              | 0.921 | -1.238 | 0.254632  | 0.528904 |
| 14736 | 10385709 | <a href="#">NM_145974</a>          | <a href="#">212706</a>    | RIKEN cDNA C330016O10 gene     | <a href="#">C330016O10Rik</a>      | 0.921 | -1.468 | 0.184335  | 0.441942 |
| 14737 | 10411552 | <a href="#">NM_001081061</a>       | <a href="#">544971</a>    | B double prime 1, subunit of R | <a href="#">Bdp1</a>               | 0.921 | -1.732 | 0.125555  | 0.354782 |
| 14738 | 10476326 | <a href="#">NM_138651</a>          | <a href="#">110911</a>    | CDP-diacylglycerol synthase (p | <a href="#">Cds2</a>               | 0.921 | -1.634 | 0.144961  | 0.386416 |
| 14739 | 10351574 | <a href="#">NM_011615</a>          | <a href="#">21945</a>     | death effector domain-containi | <a href="#">Dedd</a>               | 0.921 | -1.891 | 0.0992277 | 0.307635 |
| 14740 | 10588522 | <a href="#">NM_145620</a>          | <a href="#">27966</a>     | RRP9, small subunit (SSU) proc | <a href="#">Rrp9</a>               | 0.921 | -1.453 | 0.188291  | 0.446362 |
| 14741 | 10589099 | <a href="#">NM_029634</a>          | <a href="#">76500</a>     | inositol hexaphosphate kinase  | <a href="#">Ihpk2</a>              | 0.921 | -1.285 | 0.238619  | 0.511336 |
| 14742 | 10465790 | <a href="#">NM_146092</a>          | <a href="#">225895</a>    | TAF6-like RNA polymerase II, p | <a href="#">Taf6l</a>              | 0.921 | -1.522 | 0.170647  | 0.422304 |
| 14743 | 10569113 | <a href="#">NM_001114322</a>       | <a href="#">72040</a>     | mucin-like protocadherin       | <a href="#">Mupcdh</a>             | 0.921 | -1.604 | 0.151505  | 0.395407 |
| 14744 | 10364093 | <a href="#">NM_024440</a>          | <a href="#">70377</a>     | Der1-like domain family, membe | <a href="#">Derl3</a>              | 0.921 | -1.712 | 0.12929   | 0.360552 |
| 14745 | 10355454 | <a href="#">XR_032730</a>          | <a href="#">383528</a>    | similar to SLC25A5 protein     | <a href="#">LOC383528</a>          | 0.921 | -0.468 | 0.653714  | 0.844785 |
| 14746 | 10369655 | <a href="#">ENSMUST00000045500</a> | <a href="#">216021</a>    | storkhead box 1                | <a href="#">Stox1</a>              | 0.921 | -1.542 | 0.165699  | 0.416146 |
| 14747 | 10538466 | <a href="#">NM_001003685</a>       | <a href="#">14602</a>     | growth hormone releasing hormo | <a href="#">Ghrhr</a>              | 0.921 | -1.096 | 0.308185  | 0.584951 |
| 14748 | 10586126 |                                    |                           |                                |                                    | 0.921 | -1.86  | 0.103962  | 0.317058 |
| 14749 | 10504656 |                                    |                           |                                |                                    | 0.921 | -0.578 | 0.580576  | 0.799564 |
| 14750 | 10512669 | <a href="#">NM_008782</a>          | <a href="#">18507</a>     | paired box gene 5              | <a href="#">Pax5</a>               | 0.921 | -1.425 | 0.196043  | 0.456422 |
| 14751 | 10505749 | <a href="#">NM_001081014</a>       | <a href="#">329877</a>    | DENN/MADD domain containing 4C | <a href="#">Dennd4c</a>            | 0.921 | -1.069 | 0.319401  | 0.596434 |
| 14752 | 10479047 | <a href="#">NM_011044</a>          | <a href="#">18534</a>     | phosphoenolpyruvate carboxykin | <a href="#">Pck1</a>               | 0.921 | -0.867 | 0.413954  | 0.677396 |
| 14753 | 10437586 | <a href="#">NM_025708</a>          | <a href="#">66690</a>     | transmembrane protein 186      | <a href="#">Tmem186</a>            | 0.921 | -1.898 | 0.0983277 | 0.306086 |
| 14754 | 10444420 | <a href="#">NM_018862</a>          | <a href="#">55979</a>     | 1-acylglycerol-3-phosphate O-a | <a href="#">Agpat1</a>             | 0.921 | -1.844 | 0.106486  | 0.321808 |
| 14755 | 10435345 | <a href="#">NM_139300</a>          | <a href="#">107589</a>    | myosin, light polypeptide kina | <a href="#">Mylk</a>               | 0.921 | -0.188 | 0.856405  | 0.941981 |
| 14756 | 10424097 | <a href="#">NM_027212</a>          | <a href="#">69790</a>     | mediator complex subunit 30    | <a href="#">Med30</a>              | 0.921 | -2.026 | 0.0812457 | 0.272009 |
| 14757 | 10480901 | <a href="#">NM_001037098</a>       | <a href="#">67991</a>     | BTB (POZ) domain containing 14 | <a href="#">Btbd14a</a>            | 0.921 | -1.58  | 0.156974  | 0.403436 |
| 14758 | 10478407 | <a href="#">ENSMUST00000076667</a> | <a href="#">68386</a>     | RIKEN cDNA 0610039K10 gene     | <a href="#">0610039K10Rik</a>      | 0.921 | -1.091 | 0.310382  | 0.587004 |
| 14759 | 10371220 | <a href="#">NM_010304</a>          | <a href="#">14676</a>     | guanine nucleotide binding pro | <a href="#">Gna15</a>              | 0.921 | -0.376 | 0.717783  | 0.876765 |
| 14760 | 10527483 | <a href="#">NM_001081431</a>       | <a href="#">666311</a>    | zinc finger protein 498        | <a href="#">Zfp498</a>             | 0.921 | -0.733 | 0.486515  | 0.734369 |
| 14761 | 10598067 | <a href="#">ENSMUST00000082418</a> | <a href="#">17721</a>     | NADH dehydrogenase subunit 5   | <a href="#">ND5</a>                | 0.921 | -1.522 | 0.170468  | 0.422107 |
| 14762 | 10502191 | <a href="#">NM_025509</a>          | <a href="#">66357</a>     | RIKEN cDNA 2310008M10 gene     | <a href="#">2310008M10Rik</a>      | 0.921 | -1.686 | 0.134379  | 0.36953  |
| 14763 | 10416271 |                                    |                           |                                |                                    | 0.921 | -0.602 | 0.56579   | 0.791837 |
| 14764 | 10385790 | <a href="#">NM_008300</a>          | <a href="#">15525</a>     | heat shock protein 4           | <a href="#">Hspa4</a>              | 0.921 | -2.219 | 0.0608344 | 0.227598 |
| 14765 | 10425357 | <a href="#">NM_178719</a>          | <a href="#">239555</a>    | Smith-Magenis syndrome chromos | <a href="#">Smcr7l</a>             | 0.921 | -1.521 | 0.170701  | 0.422338 |
| 14766 | 10481378 |                                    |                           |                                |                                    | 0.921 | -0.457 | 0.661292  | 0.849184 |
| 14767 | 10601326 | <a href="#">NM_001081189</a>       | <a href="#">331487</a>    | uracil phosphoribosyltransfera | <a href="#">Uprt</a>               | 0.921 | -1.529 | 0.168775  | 0.420183 |
| 14768 | 10518882 | <a href="#">NM_207687</a>          | <a href="#">56226</a>     | espin                          | <a href="#">Espn</a>               | 0.921 | -1.52  | 0.170993  | 0.422803 |
| 14769 | 10421577 | <a href="#">BC006743</a>           | <a href="#">638575</a>    | predicted gene, ENSMUSG0000004 | <a href="#">ENSMUSG00000043225</a> | 0.921 | -0.566 | 0.58866   | 0.805172 |
| 14770 | 10585625 | <a href="#">NM_011378</a>          | <a href="#">20466</a>     | transcriptional regulator, SIN | <a href="#">Sin3a</a>              | 0.921 | -1.806 | 0.11268   | 0.332566 |
| 14771 | 10478825 | <a href="#">NM_153065</a>          | <a href="#">228889</a>    | DEAD (Asp-Glu-Ala-Asp) box pol | <a href="#">Ddx27</a>              | 0.921 | -2.242 | 0.058766  | 0.22297  |
| 14772 | 10363146 | <a href="#">NM_178675</a>          | <a href="#">215085</a>    | solute carrier family 35, memb | <a href="#">Slc35f1</a>            | 0.921 | -0.955 | 0.370702  | 0.641417 |
| 14773 | 10596377 | <a href="#">XR_032330</a>          | <a href="#">664981</a>    | hypothetical LOC664981         | <a href="#">LOC664981</a>          | 0.921 | -1.505 | 0.174735  | 0.427817 |
| 14774 | 10576101 | <a href="#">NM_001029993</a>       | <a href="#">76014</a>     | zinc finger CCCH-type containi | <a href="#">Zc3h18</a>             | 0.921 | -1.991 | 0.0855025 | 0.280626 |
| 14775 | 10416153 | <a href="#">AK148586</a>           | <a href="#">100093629</a> | predicted gene, ENSMUSG0000007 | <a href="#">ENSMUSG00000075550</a> | 0.921 | -1.165 | 0.280984  | 0.556442 |
| 14776 | 10452417 |                                    |                           |                                |                                    | 0.921 | -0.972 | 0.362395  | 0.633892 |
| 14777 | 10413874 | <a href="#">NM_001081130</a>       | <a href="#">239017</a>    | oxoglutarate dehydrogenase-lik | <a href="#">Ogdh</a>               | 0.921 | -1.981 | 0.0868892 | 0.283516 |

|       |          |                                    |                        |                                |                               |       |        |           |          |
|-------|----------|------------------------------------|------------------------|--------------------------------|-------------------------------|-------|--------|-----------|----------|
| 14778 | 10493052 | <a href="#">NM_011832</a>          | <a href="#">23920</a>  | insulin receptor-related recep | <a href="#">Insrr</a>         | 0.921 | -1.089 | 0.311285  | 0.587855 |
| 14779 | 10566136 | <a href="#">NM_001011782</a>       | <a href="#">257947</a> | olfactory receptor 543         | <a href="#">Olf543</a>        | 0.921 | -0.483 | 0.643674  | 0.838716 |
| 14780 | 10538868 | <a href="#">ENSMUST00000103302</a> | <a href="#">16114</a>  | immunoglobulin kappa chain var | <a href="#">Igf-V28</a>       | 0.921 | -0.663 | 0.527775  | 0.763341 |
| 14781 | 10379710 | <a href="#">AK087588</a>           | <a href="#">414102</a> | RIKEN cDNA E230016K23 gene     | <a href="#">E230016K23Rik</a> | 0.921 | -0.551 | 0.598047  | 0.811052 |
| 14782 | 10499954 | <a href="#">NM_025420</a>          | <a href="#">66203</a>  | late cornified envelope 1M     | <a href="#">Lce1m</a>         | 0.921 | -1.016 | 0.342544  | 0.616824 |
| 14783 | 10425078 | <a href="#">NM_138670</a>          | <a href="#">246221</a> | mercaptopyruvate sulfurtransfe | <a href="#">Mpst</a>          | 0.921 | -0.509 | 0.625858  | 0.829508 |
| 14784 | 10375732 | <a href="#">ENSMUST00000052596</a> | <a href="#">76653</a>  | chibby homolog 3 (Drosophila)  | <a href="#">Cby3</a>          | 0.921 | -0.848 | 0.423847  | 0.686151 |
| 14785 | 10521725 | <a href="#">NM_025895</a>          | <a href="#">66999</a>  | mediator of RNA polymerase II  | <a href="#">Med28</a>         | 0.921 | -1.843 | 0.106641  | 0.32207  |
| 14786 | 10385686 | <a href="#">NM_001048061</a>       | <a href="#">15384</a>  | heterogeneous nuclear ribonucl | <a href="#">Hnrpab</a>        | 0.921 | -2.058 | 0.0774718 | 0.264332 |
| 14787 | 10406111 | <a href="#">NM_011390</a>          | <a href="#">20499</a>  | solute carrier family 12, memb | <a href="#">Slc12a7</a>       | 0.921 | -2.228 | 0.0600593 | 0.22593  |
| 14788 | 10351971 | <a href="#">NM_019445</a>          | <a href="#">54418</a>  | formin 2                       | <a href="#">Fmn2</a>          | 0.921 | -1.12  | 0.298558  | 0.574742 |
| 14789 | 10573803 | <a href="#">NM_173369</a>          | <a href="#">74256</a>  | cylindromatosis (turban tumor  | <a href="#">Cylid</a>         | 0.921 | -1.876 | 0.101535  | 0.31225  |
| 14790 | 10406086 | <a href="#">NM_009354</a>          | <a href="#">21752</a>  | telomerase reverse transcripta | <a href="#">Tert</a>          | 0.921 | -1.504 | 0.175066  | 0.428228 |
| 14791 | 10525872 | <a href="#">NM_001081750</a>       | <a href="#">269704</a> | zinc finger protein 664        | <a href="#">Zfp664</a>        | 0.921 | -1.249 | 0.250555  | 0.524406 |
| 14792 | 10535225 | <a href="#">NM_030022</a>          | <a href="#">77998</a>  | galectin-related inter-fiber p | <a href="#">Grifin</a>        | 0.921 | -1.66  | 0.139629  | 0.37797  |
| 14793 | 10503334 | <a href="#">NM_010276</a>          | <a href="#">14579</a>  | GTP binding protein (gene over | <a href="#">Gem</a>           | 0.921 | -0.561 | 0.59192   | 0.807001 |
| 14794 | 10406176 | <a href="#">NM_001081060</a>       | <a href="#">105243</a> | solute carrier family 9 (sodiu | <a href="#">Slc9a3</a>        | 0.921 | -0.575 | 0.582743  | 0.800924 |
| 14795 | 10424370 | <a href="#">NM_144549</a>          | <a href="#">211770</a> | tribbles homolog 1 (Drosophila | <a href="#">Trib1</a>         | 0.921 | -1.723 | 0.127325  | 0.357621 |
| 14796 | 10533603 | <a href="#">NM_175092</a>          | <a href="#">23912</a>  | ras homolog gene family, membe | <a href="#">Rhof</a>          | 0.921 | -1.66  | 0.139671  | 0.378012 |
| 14797 | 10385155 | <a href="#">NM_001004147</a>       | <a href="#">237730</a> | expressed sequence AI595406    | <a href="#">AI595406</a>      | 0.921 | -0.706 | 0.502235  | 0.745158 |
| 14798 | 10555548 |                                    |                        |                                |                               | 0.921 | -1.226 | 0.258627  | 0.532776 |
| 14799 | 10381753 | <a href="#">NM_007762</a>          | <a href="#">12921</a>  | corticotropin releasing hormon | <a href="#">Crhr1</a>         | 0.921 | -1.034 | 0.334486  | 0.60995  |
| 14800 | 10351891 | <a href="#">NM_146722</a>          | <a href="#">258717</a> | olfactory receptor 429         | <a href="#">Olf429</a>        | 0.92  | -0.635 | 0.544951  | 0.77708  |
| 14801 | 10390519 | <a href="#">NM_028199</a>          | <a href="#">72324</a>  | plexin domain containing 1     | <a href="#">Plxdc1</a>        | 0.92  | -1.052 | 0.326727  | 0.602834 |
| 14802 | 10429234 | <a href="#">XM_981889</a>          | <a href="#">69700</a>  | collagen, type XXII, alpha 1   | <a href="#">Col22a1</a>       | 0.92  | -1.116 | 0.300111  | 0.57624  |
| 14803 | 10496492 |                                    |                        |                                |                               | 0.92  | -0.534 | 0.609281  | 0.818153 |
| 14804 | 10597841 | <a href="#">NM_029095</a>          | <a href="#">74770</a>  | hedgehog acyltransferase-like  | <a href="#">Hhat1</a>         | 0.92  | -0.799 | 0.450032  | 0.707313 |
| 14805 | 10556463 | <a href="#">NM_007489</a>          | <a href="#">11865</a>  | aryl hydrocarbon receptor nucl | <a href="#">Arntl</a>         | 0.92  | -1.62  | 0.148027  | 0.390187 |
| 14806 | 10497648 | <a href="#">NM_153421</a>          | <a href="#">241915</a> | polyhomeotic-like 3 (Drosophil | <a href="#">Phc3</a>          | 0.92  | -1.302 | 0.232947  | 0.50397  |
| 14807 | 10576482 | <a href="#">NM_026855</a>          | <a href="#">68865</a>  | ARV1 homolog (yeast)           | <a href="#">Arv1</a>          | 0.92  | -1.51  | 0.173632  | 0.426449 |
| 14808 | 10575349 | <a href="#">NM_146214</a>          | <a href="#">234724</a> | tyrosine aminotransferase      | <a href="#">Tat</a>           | 0.92  | -1.633 | 0.145321  | 0.387047 |
| 14809 | 10599435 | <a href="#">NM_177215</a>          | <a href="#">320634</a> | oculocerebrorenal syndrome of  | <a href="#">Ocr1</a>          | 0.92  | -1.193 | 0.270545  | 0.545253 |
| 14810 | 10560575 | <a href="#">NM_009046</a>          | <a href="#">19698</a>  | avian reticuloendotheliosis vi | <a href="#">Relb</a>          | 0.92  | -0.952 | 0.37194   | 0.642247 |
| 14811 | 10546695 | <a href="#">NM_015768</a>          | <a href="#">50501</a>  | prokineticin 2                 | <a href="#">Prok2</a>         | 0.92  | -1.224 | 0.25947   | 0.533772 |
| 14812 | 10376959 | <a href="#">NM_023479</a>          | <a href="#">68626</a>  | elaC homolog 2 (E. coli)       | <a href="#">Elac2</a>         | 0.92  | -1.319 | 0.227514  | 0.498297 |
| 14813 | 10597748 | <a href="#">NM_028976</a>          | <a href="#">74498</a>  | golgi reassembly stacking prot | <a href="#">Gorasp1</a>       | 0.92  | -1.511 | 0.173178  | 0.425638 |
| 14814 | 10426909 | <a href="#">NM_134093</a>          | <a href="#">68614</a>  | LETM1 domain containing 1      | <a href="#">Letmd1</a>        | 0.92  | -1.169 | 0.279575  | 0.554795 |
| 14815 | 10522902 | <a href="#">ENSMUST00000069773</a> | <a href="#">243090</a> | cDNA sequence BC051076         | <a href="#">BC051076</a>      | 0.92  | -1.07  | 0.319007  | 0.596119 |
| 14816 | 10468180 | <a href="#">NM_028627</a>          | <a href="#">73728</a>  | pleckstrin and Sec7 domain con | <a href="#">Psd</a>           | 0.92  | -0.843 | 0.426204  | 0.687965 |
| 14817 | 10396454 | <a href="#">NM_172804</a>          | <a href="#">238266</a> | synaptotagmin XVI              | <a href="#">Syt16</a>         | 0.92  | -1.171 | 0.278969  | 0.554016 |
| 14818 | 10361892 |                                    |                        |                                |                               | 0.92  | -1.259 | 0.247105  | 0.520387 |
| 14819 | 10444680 | <a href="#">NM_027366</a>          | <a href="#">70274</a>  | lymphocyte antigen 6 complex,  | <a href="#">Ly6g6e</a>        | 0.92  | -0.366 | 0.724881  | 0.880713 |
| 14820 | 10346678 | <a href="#">NM_139150</a>          | <a href="#">241066</a> | calcium response factor        | <a href="#">Carf</a>          | 0.92  | -0.791 | 0.454098  | 0.710639 |
| 14821 | 10550597 | <a href="#">NM_175530</a>          | <a href="#">243867</a> | F-box protein 46               | <a href="#">Fbxo46</a>        | 0.92  | -1.058 | 0.324132  | 0.600616 |
| 14822 | 10554965 |                                    |                        |                                |                               | 0.92  | -1.058 | 0.32414   | 0.600616 |
| 14823 | 10399387 | <a href="#">NM_019544</a>          | <a href="#">56184</a>  | mesogenin 1                    | <a href="#">Msgn1</a>         | 0.92  | -0.759 | 0.472146  | 0.723934 |
| 14824 | 10572368 | <a href="#">NM_008107</a>          | <a href="#">14559</a>  | growth differentiation factor  | <a href="#">Gdf1</a>          | 0.92  | -0.899 | 0.397697  | 0.664302 |
| 14825 | 10348166 | <a href="#">NM_009604</a>          | <a href="#">11449</a>  | cholinergic receptor, nicotini | <a href="#">Chrng</a>         | 0.92  | -1.068 | 0.319928  | 0.59668  |
| 14826 | 10421444 | <a href="#">NM_181345</a>          | <a href="#">328440</a> | nucleophosmin/nucleoplasmin 2  | <a href="#">Npm2</a>          | 0.92  | -1.308 | 0.230881  | 0.501612 |
| 14827 | 10491068 | <a href="#">NM_029150</a>          | <a href="#">70862</a>  | spermatogenesis associated 16  | <a href="#">Spata16</a>       | 0.92  | -1.019 | 0.341092  | 0.615941 |
| 14828 | 10559786 | <a href="#">NM_146913</a>          | <a href="#">258915</a> | olfactory receptor 1348        | <a href="#">Olf1348</a>       | 0.92  | -0.449 | 0.666843  | 0.851389 |
| 14829 | 10605090 | <a href="#">NM_008323</a>          | <a href="#">15929</a>  | isocitrate dehydrogenase 3 (NA | <a href="#">Idh3g</a>         | 0.92  | -2.235 | 0.0594327 | 0.224601 |
| 14830 | 10410295 | <a href="#">NM_177622</a>          | <a href="#">218314</a> | zin finger protein 595         | <a href="#">Zfp595</a>        | 0.92  | -2.325 | 0.0519234 | 0.206134 |
| 14831 | 10574161 |                                    |                        |                                |                               | 0.92  | -0.574 | 0.583529  | 0.801489 |
| 14832 | 10551207 |                                    |                        |                                |                               | 0.92  | -0.992 | 0.353191  | 0.625979 |

|       |          |                                    |                           |                                 |                                    |       |        |           |          |
|-------|----------|------------------------------------|---------------------------|---------------------------------|------------------------------------|-------|--------|-----------|----------|
| 14833 | 10531323 | <a href="#">NM_011816</a>          | <a href="#">23881</a>     | GTPase activating protein (SH3  | <a href="#">G3bp2</a>              | 0.92  | -1.938 | 0.0926314 | 0.294729 |
| 14834 | 10401138 | <a href="#">NM_023721</a>          | <a href="#">73834</a>     | ATPase, H+ transporting, lysos  | <a href="#">Atp6v1d</a>            | 0.92  | -2.094 | 0.0733571 | 0.255698 |
| 14835 | 10499299 | <a href="#">NM_022031</a>          | <a href="#">73940</a>     | hyaluronan and proteoglycan li  | <a href="#">Hapln2</a>             | 0.92  | -1.378 | 0.209527  | 0.474666 |
| 14836 | 10434348 | <a href="#">NM_172265</a>          | <a href="#">224045</a>    | eukaryotic translation initiat  | <a href="#">Eif2b5</a>             | 0.92  | -1.466 | 0.184855  | 0.44244  |
| 14837 | 10545638 | <a href="#">NM_009392</a>          | <a href="#">21909</a>     | T-cell leukemia, homeobox 2     | <a href="#">Tlx2</a>               | 0.92  | -1.782 | 0.116773  | 0.340277 |
| 14838 | 10507250 | <a href="#">NM_026651</a>          | <a href="#">68273</a>     | protein O-linked mannose beta l | <a href="#">Pomgnt1</a>            | 0.92  | -2.079 | 0.0750102 | 0.258984 |
| 14839 | 10459481 | <a href="#">NM_027400</a>          | <a href="#">70361</a>     | lectin, mannose-binding, 1      | <a href="#">Lman1</a>              | 0.92  | -1.602 | 0.15204   | 0.395822 |
| 14840 | 10354468 |                                    |                           |                                 |                                    | 0.92  | -1.409 | 0.200455  | 0.46246  |
| 14841 | 10439237 | <a href="#">ENSMUST00000059080</a> | <a href="#">66481</a>     | ribosomal protein S21           | <a href="#">Rps21</a>              | 0.92  | -1.274 | 0.242178  | 0.515049 |
| 14842 | 10401987 | <a href="#">NM_029911</a>          | <a href="#">72258</a>     | potassium channel, subfamily K  | <a href="#">Kenk10</a>             | 0.92  | -0.549 | 0.599294  | 0.811907 |
| 14843 | 10595914 | <a href="#">NM_001080776</a>       | <a href="#">382097</a>    | gene model 1123, (NCBI)         | <a href="#">Gm1123</a>             | 0.92  | -0.991 | 0.353571  | 0.626322 |
| 14844 | 10466837 |                                    |                           |                                 |                                    | 0.92  | -1.517 | 0.171758  | 0.423994 |
| 14845 | 10583753 | <a href="#">NM_001080940</a>       | <a href="#">624219</a>    | predicted gene, EG624219        | <a href="#">EG624219</a>           | 0.92  | -0.953 | 0.371626  | 0.64202  |
| 14846 | 10388884 | <a href="#">NM_008702</a>          | <a href="#">18099</a>     | nemo like kinase                | <a href="#">Nlk</a>                | 0.92  | -2.169 | 0.065566  | 0.2387   |
| 14847 | 10349593 | <a href="#">NM_026976</a>          | <a href="#">69169</a>     | Fas apoptotic inhibitory molec  | <a href="#">Faim3</a>              | 0.92  | -0.807 | 0.445712  | 0.703765 |
| 14848 | 10480224 | <a href="#">NM_010067</a>          | <a href="#">13434</a>     | tRNA aspartic acid methyltrans  | <a href="#">Trdmt1</a>             | 0.92  | -0.531 | 0.611201  | 0.819483 |
| 14849 | 10600377 | <a href="#">NM_018794</a>          | <a href="#">54411</a>     | ATPase, H+ transporting, lysos  | <a href="#">Atp6ap1</a>            | 0.92  | -1.363 | 0.21398   | 0.480314 |
| 14850 | 10528027 |                                    |                           |                                 |                                    | 0.92  | -0.864 | 0.415559  | 0.678709 |
| 14851 | 10402318 | <a href="#">NM_133364</a>          | <a href="#">170952</a>    | proline rich membrane anchor 1  | <a href="#">Prima1</a>             | 0.92  | -0.907 | 0.393538  | 0.661497 |
| 14852 | 10442493 |                                    |                           |                                 |                                    | 0.92  | -0.362 | 0.727744  | 0.88191  |
| 14853 | 10521585 |                                    |                           |                                 |                                    | 0.92  | -1.505 | 0.174736  | 0.427817 |
| 14854 | 10382774 | <a href="#">BC027639</a>           | <a href="#">69535</a>     | RIKEN cDNA 2310004N24 gene      | <a href="#">2310004N24Rik</a>      | 0.92  | -1.811 | 0.111858  | 0.331046 |
| 14855 | 10518327 |                                    |                           |                                 |                                    | 0.92  | -0.624 | 0.551989  | 0.781881 |
| 14856 | 10534940 | <a href="#">NM_001024932</a>       | <a href="#">545812</a>    | paired immunoglobulin-like type | <a href="#">Pilrb2</a>             | 0.92  | -0.539 | 0.605965  | 0.81624  |
| 14857 | 10572253 | <a href="#">NM_027481</a>          | <a href="#">70616</a>     | splicing factor 4               | <a href="#">Sf4</a>                | 0.92  | -1.895 | 0.0987419 | 0.306809 |
| 14858 | 10561170 | <a href="#">NM_053208</a>          | <a href="#">112406</a>    | EGL nine homolog 2 (C. elegans  | <a href="#">Egln2</a>              | 0.92  | -1.676 | 0.136316  | 0.372676 |
| 14859 | 10493380 | <a href="#">XR_033961</a>          | <a href="#">628070</a>    | similar to LOC506492 protein    | <a href="#">LOC628070</a>          | 0.92  | -1.447 | 0.189936  | 0.448565 |
| 14860 | 10534583 | <a href="#">XR_032332</a>          | <a href="#">269718</a>    | similar to ribosomal protein L  | <a href="#">LOC269718</a>          | 0.92  | -2.212 | 0.0614847 | 0.22896  |
| 14861 | 10591660 | <a href="#">NM_010149</a>          | <a href="#">13857</a>     | erythropoietin receptor         | <a href="#">Epor</a>               | 0.92  | -0.814 | 0.441921  | 0.700812 |
| 14862 | 10504617 | <a href="#">ENSMUST00000043958</a> | <a href="#">381522</a>    | RIKEN cDNA E230008N13 gene      | <a href="#">E230008N13Rik</a>      | 0.92  | -0.376 | 0.718076  | 0.876971 |
| 14863 | 10447697 | <a href="#">ENSMUST00000097416</a> | <a href="#">67791</a>     | RIKEN cDNA 6530411M01 gene      | <a href="#">6530411M01Rik</a>      | 0.92  | -1.531 | 0.168381  | 0.419736 |
| 14864 | 10402800 | <a href="#">NM_019925</a>          | <a href="#">56696</a>     | G protein-coupled receptor 132  | <a href="#">Gpr132</a>             | 0.92  | -1.359 | 0.215014  | 0.481962 |
| 14865 | 10376418 | <a href="#">BC117002</a>           | <a href="#">258529</a>    | olfactory receptor 313          | <a href="#">Olfr313</a>            | 0.919 | -0.806 | 0.445806  | 0.703765 |
| 14866 | 10444008 | <a href="#">NM_026712</a>          | <a href="#">328801</a>    | zinc finger protein 414         | <a href="#">Zfp414</a>             | 0.919 | -1.734 | 0.125197  | 0.354326 |
| 14867 | 10393926 | <a href="#">NM_026428</a>          | <a href="#">67880</a>     | dicarbonyl L-xylulose reductas  | <a href="#">Dexr</a>               | 0.919 | -1.184 | 0.273822  | 0.548502 |
| 14868 | 10369228 | <a href="#">NM_001034869</a>       | <a href="#">245263</a>    | predicted gene, EG245263        | <a href="#">EG245263</a>           | 0.919 | -0.584 | 0.576875  | 0.797689 |
| 14869 | 10460782 | <a href="#">NM_130453</a>          | <a href="#">170458</a>    | glycoprotein hormone alpha 2    | <a href="#">Gpha2</a>              | 0.919 | -0.94  | 0.377396  | 0.647352 |
| 14870 | 10433996 | <a href="#">NM_023348</a>          | <a href="#">67474</a>     | synaptosomal-associated protei  | <a href="#">Snap29</a>             | 0.919 | -1.165 | 0.280939  | 0.556405 |
| 14871 | 10468022 | <a href="#">NM_053164</a>          | <a href="#">94067</a>     | mitochondrial ribosomal protei  | <a href="#">Mrpl43</a>             | 0.919 | -1.799 | 0.113724  | 0.334294 |
| 14872 | 10503613 | <a href="#">XR_031966</a>          | <a href="#">664911</a>    | similar to ribosomal protein S  | <a href="#">LOC664911</a>          | 0.919 | -0.898 | 0.398249  | 0.664555 |
| 14873 | 10386182 | <a href="#">NM_001011770</a>       | <a href="#">257932</a>    | olfactory receptor 332          | <a href="#">Olfr332</a>            | 0.919 | -0.295 | 0.77621   | 0.908709 |
| 14874 | 10473793 | <a href="#">NM_008948</a>          | <a href="#">19182</a>     | proteasome (prosome, macropain  | <a href="#">Psmc3</a>              | 0.919 | -1.83  | 0.108761  | 0.325499 |
| 14875 | 10560397 | <a href="#">ENSMUST00000108482</a> | <a href="#">114864</a>    | pregnancy-specific glycoprotei  | <a href="#">Psg20</a>              | 0.919 | -1.994 | 0.0851909 | 0.280273 |
| 14876 | 10439092 | <a href="#">BC060601</a>           | <a href="#">224118</a>    | RIKEN cDNA 1700021K19 gene      | <a href="#">1700021K19Rik</a>      | 0.919 | -1.748 | 0.12272   | 0.350505 |
| 14877 | 10349295 | <a href="#">NM_023755</a>          | <a href="#">81879</a>     | transcription factor CP2-like   | <a href="#">Tcfep21l</a>           | 0.919 | -1.706 | 0.130481  | 0.362441 |
| 14878 | 10565634 | <a href="#">NM_008663</a>          | <a href="#">17921</a>     | myosin VIIa                     | <a href="#">Myo7a</a>              | 0.919 | -1.133 | 0.293603  | 0.56967  |
| 14879 | 10536973 | <a href="#">ENSMUST00000052497</a> | <a href="#">76419</a>     | RIKEN cDNA 1700023L04 gene      | <a href="#">1700023L04Rik</a>      | 0.919 | -0.653 | 0.533734  | 0.767706 |
| 14880 | 10561920 | <a href="#">NM_011827</a>          | <a href="#">23900</a>     | hematopoietic cell signal tran  | <a href="#">Hcst</a>               | 0.919 | -0.37  | 0.722169  | 0.879197 |
| 14881 | 10561059 | <a href="#">ENSMUST00000098663</a> | <a href="#">632778</a>    | predicted gene, EG632778        | <a href="#">EG632778</a>           | 0.919 | -1.289 | 0.23731   | 0.509565 |
| 14882 | 10509071 | <a href="#">AK162333</a>           | <a href="#">100038432</a> | predicted gene, ENSMUSG0000007  | <a href="#">ENSMUSG00000073746</a> | 0.919 | -0.569 | 0.586406  | 0.803667 |
| 14883 | 10433797 | <a href="#">NM_011159</a>          | <a href="#">19090</a>     | protein kinase, DNA activated,  | <a href="#">Prkdc</a>              | 0.919 | -2.054 | 0.0779188 | 0.265471 |
| 14884 | 10460151 | <a href="#">NM_172252</a>          | <a href="#">353242</a>    | mitochondrial ribosomal protei  | <a href="#">Mrpl21</a>             | 0.919 | -1.568 | 0.159558  | 0.40691  |
| 14885 | 10489004 | <a href="#">NM_010911</a>          | <a href="#">18041</a>     | nitrogen fixation gene 1 (S. c  | <a href="#">Nfs1</a>               | 0.919 | -1.805 | 0.112742  | 0.33261  |

|       |          |                                    |                           |                                   |                               |       |        |           |          |
|-------|----------|------------------------------------|---------------------------|-----------------------------------|-------------------------------|-------|--------|-----------|----------|
| 14886 | 10474769 | <a href="#">NM_009773</a>          | <a href="#">12236</a>     | budding uninhibited by benzimi    | <a href="#">Bub1b</a>         | 0.919 | -1.447 | 0.189926  | 0.448565 |
| 14887 | 10585224 | <a href="#">NM_198675</a>          | <a href="#">382137</a>    | RIKEN cDNA D630004A14 gene        | <a href="#">D630004A14Rik</a> | 0.919 | -0.144 | 0.889196  | 0.956449 |
| 14888 | 10449018 | <a href="#">NM_026897</a>          | <a href="#">68977</a>     | hydroxyacylglutathione hydrola    | <a href="#">Haghl</a>         | 0.919 | -1.918 | 0.0953809 | 0.300154 |
| 14889 | 10502232 | <a href="#">NM_007926</a>          | <a href="#">13722</a>     | small inducible cytokine subfa    | <a href="#">Scye1</a>         | 0.919 | -2.548 | 0.0373065 | 0.166124 |
| 14890 | 10380025 | <a href="#">NM_031386</a>          | <a href="#">83560</a>     | testis expressed gene 14          | <a href="#">Tex14</a>         | 0.919 | -1.344 | 0.219652  | 0.488523 |
| 14891 | 10393620 | <a href="#">NM_007625</a>          | <a href="#">12418</a>     | chromobox homolog 4               | <a href="#">Cbx4</a>          | 0.919 | -1.28  | 0.240062  | 0.51313  |
| 14892 | 10444320 | <a href="#">BC052925</a>           | <a href="#">100038862</a> | (Drosophil<br>butyrophilin-like 1 | <a href="#">Btml1</a>         | 0.919 | -0.55  | 0.598679  | 0.811605 |
| 14893 | 10426822 | <a href="#">BC059905</a>           | <a href="#">66379</a>     | RIKEN cDNA 2310016M24 gene        | <a href="#">2310016M24Rik</a> | 0.919 | -1.469 | 0.184027  | 0.441415 |
| 14894 | 10529402 | <a href="#">NM_139064</a>          | <a href="#">231130</a>    | TNFAIP3 interacting protein 2     | <a href="#">Tnip2</a>         | 0.919 | -1.516 | 0.172066  | 0.424165 |
| 14895 | 10576010 | <a href="#">NM_198671</a>          | <a href="#">382034</a>    | genetic suppressor element 1      | <a href="#">Gse1</a>          | 0.919 | -1.428 | 0.194994  | 0.455123 |
| 14896 | 10547633 | <a href="#">NM_008108</a>          | <a href="#">14562</a>     | growth differentiation factor     | <a href="#">Gdf3</a>          | 0.919 | -0.561 | 0.592028  | 0.80703  |
| 14897 | 10424922 | <a href="#">NM_029643</a>          | <a href="#">52710</a>     | G protein-coupled receptor 172    | <a href="#">Gpr172b</a>       | 0.919 | -1.924 | 0.094513  | 0.298489 |
| 14898 | 10559610 | <a href="#">NM_172894</a>          | <a href="#">243819</a>    | SAPS domain family, member 1      | <a href="#">Saps1</a>         | 0.919 | -1.425 | 0.195954  | 0.456422 |
| 14899 | 10382610 | <a href="#">NM_029557</a>          | <a href="#">76265</a>     | tRNA splicing endonuclease 54     | <a href="#">Tsen54</a>        | 0.919 | -1.344 | 0.219807  | 0.488612 |
| 14900 | 10539795 | <a href="#">NM_025467</a>          | <a href="#">66284</a>     | gastrokine 2                      | <a href="#">Gkn2</a>          | 0.919 | -0.634 | 0.545795  | 0.777543 |
| 14901 | 10535946 | <a href="#">NM_201369</a>          | <a href="#">381695</a>    | NEDD4 binding protein 2-like 2    | <a href="#">N4bp2l2</a>       | 0.919 | -1.975 | 0.0875779 | 0.284796 |
| 14902 | 10566525 | <a href="#">NM_020024</a>          | <a href="#">24075</a>     | TAF10 RNA polymerase II, TATA     | <a href="#">Taf10</a>         | 0.919 | -2.488 | 0.0407805 | 0.176044 |
| 14903 | 10345875 |                                    |                           |                                   |                               | 0.919 | -0.63  | 0.548049  | 0.778543 |
| 14904 | 10362916 |                                    |                           |                                   |                               | 0.919 | -1.512 | 0.173007  | 0.425494 |
| 14905 | 10545394 | <a href="#">NM_025607</a>          | <a href="#">66510</a>     | ring finger protein 181           | <a href="#">Rnf181</a>        | 0.919 | -0.975 | 0.361227  | 0.633052 |
| 14906 | 10532030 | <a href="#">XR_032153</a>          | <a href="#">433945</a>    | predicted gene, EG433945          | <a href="#">EG433945</a>      | 0.919 | -1.073 | 0.317907  | 0.595116 |
| 14907 | 10421197 | <a href="#">NM_134078</a>          | <a href="#">105513</a>    | CHMP family, member 7             | <a href="#">Chmp7</a>         | 0.919 | -1.149 | 0.287183  | 0.562971 |
| 14908 | 10496417 | <a href="#">NM_175389</a>          | <a href="#">108943</a>    | RNA (guanine-9-) methyltransfe    | <a href="#">Re9mtd2</a>       | 0.919 | -2.147 | 0.0678045 | 0.243316 |
| 14909 | 10444268 | <a href="#">NM_011530</a>          | <a href="#">21355</a>     | transporter 2, ATP-binding cas    | <a href="#">Tap2</a>          | 0.919 | -0.76  | 0.471327  | 0.723204 |
| 14910 | 10584901 | <a href="#">NM_001081270</a>       | <a href="#">114873</a>    | Down syndrome cell adhesion mo    | <a href="#">Dscaml1</a>       | 0.919 | -1.527 | 0.169258  | 0.42056  |
| 14911 | 10348076 | <a href="#">ENSMUST00000086964</a> | <a href="#">100040414</a> | similar to ribosomal protein L    | <a href="#">LOC100040414</a>  | 0.919 | -1.037 | 0.333372  | 0.609285 |
| 14912 | 10546889 |                                    |                           |                                   |                               | 0.919 | -0.491 | 0.638351  | 0.835923 |
| 14913 | 10605247 | <a href="#">NM_010788</a>          | <a href="#">17257</a>     | methyl CpG binding protein 2      | <a href="#">Meep2</a>         | 0.919 | -0.753 | 0.475193  | 0.726714 |
| 14914 | 10486935 | <a href="#">NM_026251</a>          | <a href="#">67578</a>     | protein associated with topois    | <a href="#">Patl2</a>         | 0.919 | -0.642 | 0.540729  | 0.773244 |
| 14915 | 10485213 | <a href="#">NM_007656</a>          | <a href="#">12521</a>     | CD82 antigen                      | <a href="#">Cd82</a>          | 0.919 | -1.357 | 0.21585   | 0.482956 |
| 14916 | 10480808 | <a href="#">NM_001005424</a>       | <a href="#">381353</a>    | gene model 996, (NCBI)            | <a href="#">Gm996</a>         | 0.919 | -0.741 | 0.481849  | 0.730954 |
| 14917 | 10409330 | <a href="#">BC033445</a>           | <a href="#">97820</a>     | RIKEN cDNA 4833439L19 gene        | <a href="#">4833439L19Rik</a> | 0.919 | -1.582 | 0.156333  | 0.402325 |
| 14918 | 10430909 | <a href="#">NM_029562</a>          | <a href="#">76279</a>     | cytochrome P450, family 2, sub    | <a href="#">Cyp2d26</a>       | 0.919 | -1.673 | 0.137062  | 0.373617 |
| 14919 | 10594092 | <a href="#">NM_133983</a>          | <a href="#">102657</a>    | CD276 antigen                     | <a href="#">Cd276</a>         | 0.919 | -1.584 | 0.156062  | 0.401895 |
| 14920 | 10357371 | <a href="#">NM_028135</a>          | <a href="#">72160</a>     | transmembrane protein 163         | <a href="#">Tmem163</a>       | 0.919 | -0.84  | 0.428122  | 0.689167 |
| 14921 | 10523483 | <a href="#">NM_029947</a>          | <a href="#">77630</a>     | PR domain containing 8            | <a href="#">Prdm8</a>         | 0.919 | -0.864 | 0.415172  | 0.678399 |
| 14922 | 10565137 | <a href="#">NM_172904</a>          | <a href="#">244091</a>    | fibronectin type III and SPRY     | <a href="#">Fsd2</a>          | 0.919 | -1.134 | 0.292944  | 0.569014 |
| 14923 | 10391273 | <a href="#">NM_010410</a>          | <a href="#">15171</a>     | hypocretin                        | <a href="#">Hert</a>          | 0.919 | -0.844 | 0.426014  | 0.687748 |
| 14924 | 10476668 | <a href="#">NM_181417</a>          | <a href="#">228714</a>    | cysteine and glycine-rich prot    | <a href="#">Csrp2bp</a>       | 0.919 | -2.154 | 0.0670381 | 0.241804 |
| 14925 | 10479159 | <a href="#">NM_001099328</a>       | <a href="#">100043757</a> | likely orthologue of H. sapien    | <a href="#">RP23_45P4.1</a>   | 0.919 | -1.822 | 0.11004   | 0.328028 |
| 14926 | 10473584 |                                    |                           |                                   |                               | 0.919 | -1.01  | 0.345075  | 0.619061 |
| 14927 | 10544442 | <a href="#">NM_001081301</a>       | <a href="#">546896</a>    | predicted gene, EG546896          | <a href="#">EG546896</a>      | 0.919 | -1.102 | 0.305807  | 0.582258 |
| 14928 | 10532332 | <a href="#">NM_028273</a>          | <a href="#">72542</a>     | phosphoglycerate mutase family    | <a href="#">Pgam5</a>         | 0.919 | -2.919 | 0.0216248 | 0.115434 |
| 14929 | 10520638 | <a href="#">NM_027855</a>          | <a href="#">381629</a>    | RIKEN cDNA 0610007C21 gene        | <a href="#">0610007C21Rik</a> | 0.919 | -2.353 | 0.0498096 | 0.200566 |
| 14930 | 10439032 | <a href="#">NM_177326</a>          | <a href="#">224105</a>    | p21 (CDKN1A)-activated kinase     | <a href="#">Pak2</a>          | 0.919 | -1.583 | 0.156234  | 0.402137 |
| 14931 | 10453426 | <a href="#">NM_029121</a>          | <a href="#">74915</a>     | ATPase, H+ transporting, lysos    | <a href="#">Atp6v1e2</a>      | 0.919 | -1.429 | 0.19499   | 0.455123 |
| 14932 | 10497929 |                                    |                           |                                   |                               | 0.919 | -0.68  | 0.517777  | 0.756834 |
| 14933 | 10526069 | <a href="#">NM_009838</a>          | <a href="#">12466</a>     | chaperonin subunit 6a (zeta)      | <a href="#">Cct6a</a>         | 0.919 | -2.632 | 0.0329244 | 0.152833 |
| 14934 | 10398297 |                                    |                           |                                   |                               | 0.919 | -0.734 | 0.486155  | 0.734128 |
| 14935 | 10386418 | <a href="#">XR_032580</a>          | <a href="#">668157</a>    | similar to high mobility group    | <a href="#">LOC668157</a>     | 0.919 | -0.259 | 0.803088  | 0.920071 |
| 14936 | 10499316 | <a href="#">NM_172526</a>          | <a href="#">214191</a>    | tetratricopeptide repeat domai    | <a href="#">Ttc24</a>         | 0.919 | -0.583 | 0.577438  | 0.797771 |
| 14937 | 10409212 |                                    |                           |                                   |                               | 0.919 | -1.151 | 0.28658   | 0.562228 |

|       |          |                                    |                           |                                |                                    |       |        |           |          |
|-------|----------|------------------------------------|---------------------------|--------------------------------|------------------------------------|-------|--------|-----------|----------|
| 14938 | 10549730 | <a href="#">NM_201355</a>          | <a href="#">269854</a>    | N-acetyltransferase 14         | <a href="#">Nat14</a>              | 0.919 | -1.021 | 0.34011   | 0.615475 |
| 14939 | 10346114 |                                    |                           |                                |                                    | 0.919 | -0.62  | 0.554641  | 0.783704 |
| 14940 | 10380398 | <a href="#">NM_007689</a>          | <a href="#">12643</a>     | chondroadherin                 | <a href="#">Chad</a>               | 0.918 | -0.793 | 0.453172  | 0.70973  |
| 14941 | 10490061 | <a href="#">NM_029815</a>          | <a href="#">76960</a>     | breast carcinoma amplified seq | <a href="#">Bcas1</a>              | 0.918 | -0.971 | 0.362986  | 0.63431  |
| 14942 | 10525381 | <a href="#">NM_019780</a>          | <a href="#">56433</a>     | vacuolar protein sorting 29 (S | <a href="#">Vps29</a>              | 0.918 | -1.503 | 0.175328  | 0.42857  |
| 14943 | 10359961 | <a href="#">NM_010633</a>          | <a href="#">16589</a>     | U2AF homology motif (UHM) kina | <a href="#">Uhmk1</a>              | 0.918 | -1.529 | 0.168758  | 0.420183 |
| 14944 | 10353415 | <a href="#">NM_145856</a>          | <a href="#">257630</a>    | interleukin 17F                | <a href="#">Il17f</a>              | 0.918 | -1.105 | 0.304499  | 0.581024 |
| 14945 | 10550840 | <a href="#">NM_021307</a>          | <a href="#">57745</a>     | zinc finger protein 112        | <a href="#">Zfp112</a>             | 0.918 | -0.951 | 0.372327  | 0.642651 |
| 14946 | 10526587 | <a href="#">NM_031408</a>          | <a href="#">57330</a>     | GRB10 interacting GYF protein  | <a href="#">Gigyf1</a>             | 0.918 | -1.6   | 0.152484  | 0.396375 |
| 14947 | 10460359 | <a href="#">NM_011778</a>          | <a href="#">23789</a>     | coronin, actin binding protein | <a href="#">Coro1b</a>             | 0.918 | -2.329 | 0.0516378 | 0.205347 |
| 14948 | 10539026 | <a href="#">NM_029673</a>          | <a href="#">76614</a>     | inner membrane protein, mitoch | <a href="#">Immt</a>               | 0.918 | -1.716 | 0.128565  | 0.359526 |
| 14949 | 10352125 | <a href="#">ENSMUST00000069568</a> | <a href="#">791357</a>    | predicted gene, ENSMUSG0000005 | <a href="#">ENSMUSG00000055831</a> | 0.918 | -1.033 | 0.334835  | 0.610375 |
| 14950 | 10397604 |                                    |                           |                                |                                    | 0.918 | -0.485 | 0.641998  | 0.837836 |
| 14951 | 10593751 | <a href="#">NM_145229</a>          | <a href="#">246735</a>    | cDNA sequence AY074887         | <a href="#">AY074887</a>           | 0.918 | -0.584 | 0.577278  | 0.797771 |
| 14952 | 10568939 | <a href="#">NM_053119</a>          | <a href="#">93747</a>     | enoyl Coenzyme A hydratase, sh | <a href="#">Echs1</a>              | 0.918 | -2.184 | 0.0641009 | 0.235304 |
| 14953 | 10367671 |                                    |                           |                                |                                    | 0.918 | -0.65  | 0.536126  | 0.769315 |
| 14954 | 10579915 | <a href="#">NM_053124</a>          | <a href="#">93762</a>     | SWI/SNF related, matrix associ | <a href="#">Smarca5</a>            | 0.918 | -2.231 | 0.0597391 | 0.225162 |
| 14955 | 10414258 |                                    |                           |                                |                                    | 0.918 | -0.962 | 0.367264  | 0.638184 |
| 14956 | 10553140 | <a href="#">NM_144801</a>          | <a href="#">70209</a>     | transmembrane protein 143      | <a href="#">Tmem143</a>            | 0.918 | -1.583 | 0.156145  | 0.401989 |
| 14957 | 10408077 | <a href="#">NM_178183</a>          | <a href="#">319169</a>    | histone cluster 1, H2ak        | <a href="#">Hist1h2ak</a>          | 0.918 | -1.004 | 0.347794  | 0.621829 |
| 14958 | 10447084 | <a href="#">NM_176963</a>          | <a href="#">319625</a>    | galactose mutarotase           | <a href="#">Galm</a>               | 0.918 | -1.737 | 0.124744  | 0.353522 |
| 14959 | 10571621 | <a href="#">NM_138668</a>          | <a href="#">192169</a>    | UFM1-specific peptidase 2      | <a href="#">Ufsp2</a>              | 0.918 | -2.211 | 0.061583  | 0.229285 |
| 14960 | 10363430 | <a href="#">NM_011179</a>          | <a href="#">19156</a>     | prosaposin                     | <a href="#">Psap</a>               | 0.918 | -1.79  | 0.115364  | 0.337519 |
| 14961 | 10447729 | <a href="#">U44941</a>             | <a href="#">19317</a>     | quaking                        | <a href="#">Qk</a>                 | 0.918 | -1.237 | 0.255     | 0.529326 |
| 14962 | 10580080 | <a href="#">ENSMUST00000098592</a> | <a href="#">100038416</a> | predicted gene, ENSMUSG0000007 | <a href="#">ENSMUSG00000074215</a> | 0.918 | -0.544 | 0.603126  | 0.814471 |
| 14963 | 10557326 | <a href="#">NM_001008700</a>       | <a href="#">16190</a>     | interleukin 4 receptor, alpha  | <a href="#">Il4ra</a>              | 0.918 | -1.301 | 0.233334  | 0.504511 |
| 14964 | 10601277 | <a href="#">XR_031632</a>          | <a href="#">676150</a>    | similar to transcriptional ada | <a href="#">LOC676150</a>          | 0.918 | -1.178 | 0.27629   | 0.551172 |
| 14965 | 10541144 | <a href="#">NM_001033382</a>       | <a href="#">319734</a>    | calcium channel, voltage-depen | <a href="#">Cacna2d4</a>           | 0.918 | -1.316 | 0.228539  | 0.499559 |
| 14966 | 10535053 | <a href="#">NM_008923</a>          | <a href="#">19085</a>     | protein kinase, cAMP dependent | <a href="#">Prkar1b</a>            | 0.918 | -1.525 | 0.169858  | 0.421288 |
| 14967 | 10548857 | <a href="#">NM_175652</a>          | <a href="#">320332</a>    | histone cluster 4, H4          | <a href="#">Hist4h4</a>            | 0.918 | -1.87  | 0.102452  | 0.313948 |
| 14968 | 10594613 | <a href="#">NM_144937</a>          | <a href="#">235441</a>    | ubiquitin specific peptidase 3 | <a href="#">Usp3</a>               | 0.918 | -1.654 | 0.140753  | 0.379507 |
| 14969 | 10544570 | <a href="#">NM_001024622</a>       | <a href="#">76302</a>     | PEST proteolytic signal contai | <a href="#">Pcnp</a>               | 0.918 | -1.53  | 0.168731  | 0.420183 |
| 14970 | 10571514 |                                    |                           |                                |                                    | 0.918 | -0.946 | 0.374588  | 0.644557 |
| 14971 | 10521626 | <a href="#">NM_172274</a>          | <a href="#">231214</a>    | coiled-coil and C2 domain cont | <a href="#">Cc2d2a</a>             | 0.918 | -1.501 | 0.17575   | 0.429353 |
| 14972 | 10575029 | <a href="#">ENSMUST00000066875</a> | <a href="#">330837</a>    | RIKEN cDNA 6030452D12 gene     | <a href="#">6030452D12Rik</a>      | 0.918 | -0.41  | 0.693955  | 0.865705 |
| 14973 | 10392845 | <a href="#">NM_145634</a>          | <a href="#">246746</a>    | CD300 antigen like family memb | <a href="#">Cd300lf</a>            | 0.918 | -1.352 | 0.21732   | 0.485013 |
| 14974 | 10380297 | <a href="#">NM_199008</a>          | <a href="#">69802</a>     | COX11 homolog, cytochrome c ox | <a href="#">Cox11</a>              | 0.918 | -1.415 | 0.198722  | 0.459864 |
| 14975 | 10605222 | <a href="#">NM_008363</a>          | <a href="#">16179</a>     | interleukin-1 receptor-associa | <a href="#">Irak1</a>              | 0.918 | -1.747 | 0.122954  | 0.350793 |
| 14976 | 10535006 | <a href="#">NM_001115015</a>       | <a href="#">231807</a>    | cDNA sequence BC037034         | <a href="#">BC037034</a>           | 0.918 | -1.313 | 0.229556  | 0.500642 |
| 14977 | 10566678 | <a href="#">NM_001011810</a>       | <a href="#">258041</a>    | olfactory receptor 485         | <a href="#">Olfr485</a>            | 0.918 | -0.42  | 0.686681  | 0.861723 |
| 14978 | 10542310 | <a href="#">NM_009875</a>          | <a href="#">12576</a>     | cyclin-dependent kinase inhibi | <a href="#">Cdkn1b</a>             | 0.918 | -2.036 | 0.0800143 | 0.269699 |
| 14979 | 10542674 | <a href="#">ENSMUST00000100821</a> | <a href="#">665037</a>    | predicted gene, EG665037       | <a href="#">EG665037</a>           | 0.918 | -0.804 | 0.447051  | 0.704723 |
| 14980 | 10542034 | <a href="#">ENSMUST0000009097</a>  | <a href="#">243642</a>    | predicted gene, EG243642       | <a href="#">EG243642</a>           | 0.918 | -1.406 | 0.201419  | 0.463821 |
| 14981 | 10605786 |                                    |                           |                                |                                    | 0.918 | -1.456 | 0.18751   | 0.445758 |
| 14982 | 10417813 | <a href="#">NM_027475</a>          | <a href="#">70601</a>     | ecdysoneless homolog (Drosophi | <a href="#">Ecd</a>                | 0.918 | -1.989 | 0.0858284 | 0.281187 |
| 14983 | 10520650 | <a href="#">NM_023525</a>          | <a href="#">69719</a>     | carbamoyl-phosphate synthetase | <a href="#">Cad</a>                | 0.918 | -1.764 | 0.119801  | 0.346027 |
| 14984 | 10400971 | <a href="#">NM_011382</a>          | <a href="#">20474</a>     | sine oculis-related homeobox 4 | <a href="#">Six4</a>               | 0.918 | -1.579 | 0.157169  | 0.403641 |
| 14985 | 10542221 |                                    |                           |                                |                                    | 0.918 | -1.875 | 0.101626  | 0.312332 |
| 14986 | 10476342 | <a href="#">ENSMUST00000028819</a> | <a href="#">70845</a>     | RIKEN cDNA 4921508D12 gene     | <a href="#">4921508D12Rik</a>      | 0.918 | -0.784 | 0.457767  | 0.713313 |
| 14987 | 10373912 | <a href="#">NM_001013365</a>       | <a href="#">18413</a>     | oncostatin M                   | <a href="#">Osm</a>                | 0.918 | -0.789 | 0.455152  | 0.711341 |
| 14988 | 10544200 | <a href="#">NM_14501054</a>        | <a href="#">71204</a>     | Williams Beuren syndrome       | <a href="#">Wbs</a>                | 0.918 | -0.788 | 0.455000  | 0.711341 |

|       |          |                                    |                           |                                 |                                    |       |        |           |          |
|-------|----------|------------------------------------|---------------------------|---------------------------------|------------------------------------|-------|--------|-----------|----------|
| 14988 | 10534399 | <a href="#">AY081924</a>           | <a href="#">/1304</a>     | chrom                           | <a href="#">Wbscr25</a>            | 0.918 | -0.788 | 0.455938  | 0.712559 |
| 14989 | 10426875 | <a href="#">NM_007497</a>          | <a href="#">11908</a>     | activating transcription facto  | <a href="#">Atf1</a>               | 0.918 | -1.926 | 0.0942107 | 0.29789  |
| 14990 | 10585601 | <a href="#">NM_178374</a>          | <a href="#">66069</a>     | snurportin 1                    | <a href="#">Snupn</a>              | 0.918 | -1.702 | 0.131219  | 0.363772 |
| 14991 | 10467989 | <a href="#">NM_001033343</a>       | <a href="#">240667</a>    | Sec31 homolog B (S. cerevisiae) | <a href="#">Sec31b</a>             | 0.918 | -0.846 | 0.424769  | 0.686726 |
| 14992 | 10593367 | <a href="#">NM_145614</a>          | <a href="#">235339</a>    | dihydroliipoamide S-acetyltrans | <a href="#">Dlat</a>               | 0.918 | -2.44  | 0.0437952 | 0.1843   |
| 14993 | 10448878 | <a href="#">ENSMUST00000056357</a> | <a href="#">545192</a>    | BAI1-associated protein 3       | <a href="#">Baiap3</a>             | 0.918 | -1.219 | 0.261269  | 0.535766 |
| 14994 | 10346867 | <a href="#">NM_018796</a>          | <a href="#">55949</a>     | eukaryotic translation elongat  | <a href="#">Eef1b2</a>             | 0.918 | -2.084 | 0.0744217 | 0.258046 |
| 14995 | 10537938 | <a href="#">BC119280</a>           | <a href="#">101197</a>    | expressed sequence AI894139     | <a href="#">AI894139</a>           | 0.918 | -1.772 | 0.118381  | 0.343378 |
| 14996 | 10560434 | <a href="#">NM_026111</a>          | <a href="#">67369</a>     | glutaminyI-peptide cyclotransf  | <a href="#">Opct1</a>              | 0.918 | -1.044 | 0.330007  | 0.606438 |
| 14997 | 10505030 | <a href="#">NM_176966</a>          | <a href="#">319636</a>    | fibronectin type III and SPRY   | <a href="#">Fsd11</a>              | 0.918 | -1.438 | 0.19243   | 0.451882 |
| 14998 | 10538751 | <a href="#">NM_007500</a>          | <a href="#">11921</a>     | atonal homolog 1 (Drosophila)   | <a href="#">Atoh1</a>              | 0.918 | -0.978 | 0.359717  | 0.631715 |
| 14999 | 10530130 | <a href="#">NM_145923</a>          | <a href="#">100532</a>    | RELT-like 1                     | <a href="#">Rel11</a>              | 0.918 | -2.16  | 0.0664884 | 0.240889 |
| 15000 | 10444079 | <a href="#">NM_009059</a>          | <a href="#">19732</a>     | ral guanine nucleotide dissoci  | <a href="#">Rgl2</a>               | 0.917 | -1.584 | 0.155933  | 0.401839 |
| 15001 | 10551195 |                                    |                           |                                 |                                    | 0.917 | -1.246 | 0.251657  | 0.525573 |
| 15002 | 10437364 | <a href="#">NM_009624</a>          | <a href="#">11515</a>     | adenylate cyclase 9             | <a href="#">Adcy9</a>              | 0.917 | -0.813 | 0.442334  | 0.700945 |
| 15003 | 10575842 |                                    |                           |                                 |                                    | 0.917 | -0.315 | 0.761934  | 0.900975 |
| 15004 | 10395612 | <a href="#">NM_001015099</a>       | <a href="#">217558</a>    | RIKEN cDNA 6030408C04 gene      | <a href="#">6030408C04Rik</a>      | 0.917 | -1.57  | 0.159217  | 0.406366 |
| 15005 | 10533989 | <a href="#">ENSMUST00000116112</a> | <a href="#">231736</a>    | predicted gene, EG231736        | <a href="#">EG231736</a>           | 0.917 | -0.798 | 0.450257  | 0.707462 |
| 15006 | 10542255 | <a href="#">NM_207018</a>          | <a href="#">387345</a>    | taste receptor, type 2, member  | <a href="#">Tas2r113</a>           | 0.917 | -0.214 | 0.83671   | 0.934075 |
| 15007 | 10490199 |                                    |                           |                                 |                                    | 0.917 | -0.739 | 0.483407  | 0.732228 |
| 15008 | 10454836 | <a href="#">AK006900</a>           | <a href="#">73449</a>     | RIKEN cDNA 1700066B19 gene      | <a href="#">1700066B19Rik</a>      | 0.917 | -0.54  | 0.605577  | 0.816017 |
| 15009 | 10428796 | <a href="#">NM_026346</a>          | <a href="#">67731</a>     | F-box protein 32                | <a href="#">Fbxo32</a>             | 0.917 | -1.382 | 0.20818   | 0.472799 |
| 15010 | 10376912 | <a href="#">NM_001033669</a>       | <a href="#">213980</a>    | F-box and WD-40 domain protein  | <a href="#">Fbxw10</a>             | 0.917 | -1.484 | 0.180153  | 0.435693 |
| 15011 | 10356401 |                                    |                           |                                 |                                    | 0.917 | -0.867 | 0.414035  | 0.677432 |
| 15012 | 10430474 | <a href="#">NM_177580</a>          | <a href="#">207495</a>    | BAI1-associated protein 2-like  | <a href="#">Baiap212</a>           | 0.917 | -1.429 | 0.194738  | 0.454775 |
| 15013 | 10584580 |                                    |                           |                                 |                                    | 0.917 | -0.651 | 0.535423  | 0.769059 |
| 15014 | 10544795 |                                    |                           |                                 |                                    | 0.917 | -0.651 | 0.535512  | 0.769059 |
| 15015 | 10596465 | <a href="#">NM_025371</a>          | <a href="#">109652</a>    | aminoacylase 1                  | <a href="#">Acy1</a>               | 0.917 | -1.095 | 0.308535  | 0.585197 |
| 15016 | 10352459 | <a href="#">BC057872</a>           | <a href="#">98732</a>     | RAB3 GTPase activating protein  | <a href="#">Rab3gap2</a>           | 0.917 | -1.235 | 0.255629  | 0.529946 |
| 15017 | 10484720 | <a href="#">NM_146650</a>          | <a href="#">258644</a>    | olfactory receptor 1166         | <a href="#">Olfr1166</a>           | 0.917 | -0.657 | 0.531314  | 0.765579 |
| 15018 | 10390381 | <a href="#">NM_008942</a>          | <a href="#">19155</a>     | aminopeptidase puromycin sensi  | <a href="#">Npepps</a>             | 0.917 | -1.824 | 0.109664  | 0.327274 |
| 15019 | 10478258 | <a href="#">NM_022883</a>          | <a href="#">64899</a>     | lipin 3                         | <a href="#">Lpin3</a>              | 0.917 | -2     | 0.0844567 | 0.278893 |
| 15020 | 10357191 | <a href="#">NM_019933</a>          | <a href="#">19258</a>     | protein tyrosine phosphatase,   | <a href="#">Ptpn4</a>              | 0.917 | -1.659 | 0.139798  | 0.378113 |
| 15021 | 10504660 |                                    |                           |                                 |                                    | 0.917 | -1.097 | 0.307758  | 0.584342 |
| 15022 | 10394555 | <a href="#">NM_023697</a>          | <a href="#">105014</a>    | retinol dehydrogenase 14 (all-  | <a href="#">Rdh14</a>              | 0.917 | -1.241 | 0.253508  | 0.527784 |
| 15023 | 10375525 | <a href="#">NM_146877</a>          | <a href="#">258877</a>    | olfactory receptor 1395         | <a href="#">Olfr1395</a>           | 0.917 | -0.996 | 0.351591  | 0.624753 |
| 15024 | 10383047 | <a href="#">NM_001030291</a>       | <a href="#">238011</a>    | ectonucleotide pyrophosphatase  | <a href="#">Enpp7</a>              | 0.917 | -0.539 | 0.605815  | 0.816194 |
| 15025 | 10488673 | <a href="#">NM_010226</a>          | <a href="#">14239</a>     | forkhead box S1                 | <a href="#">Foxs1</a>              | 0.917 | -1.085 | 0.312822  | 0.589257 |
| 15026 | 10590149 | <a href="#">NM_001033209</a>       | <a href="#">102448</a>    | xylulokinase homolog (H. influ  | <a href="#">Xylb</a>               | 0.917 | -1.942 | 0.0920119 | 0.293984 |
| 15027 | 10353477 |                                    |                           |                                 |                                    | 0.917 | -1.314 | 0.229164  | 0.500215 |
| 15028 | 10484559 | <a href="#">NM_207561</a>          | <a href="#">404323</a>    | olfactory receptor 1040         | <a href="#">Olfr1040</a>           | 0.917 | -1.008 | 0.346116  | 0.620193 |
| 15029 | 10535894 | <a href="#">NM_010439</a>          | <a href="#">15289</a>     | high mobility group box 1       | <a href="#">Hmgb1</a>              | 0.917 | -1.409 | 0.200538  | 0.462549 |
| 15030 | 10601863 | <a href="#">XR_035494</a>          | <a href="#">666180</a>    | similar to RIKEN cDNA 5730427N  | <a href="#">LOC666180</a>          | 0.917 | -0.564 | 0.589639  | 0.805747 |
| 15031 | 10363639 | <a href="#">NM_016864</a>          | <a href="#">53404</a>     | atonal homolog 7 (Drosophila)   | <a href="#">Atoh7</a>              | 0.917 | -1.041 | 0.3315    | 0.607966 |
| 15032 | 10561673 | <a href="#">NM_182927</a>          | <a href="#">101809</a>    | sprouty-related, EVH1 domain c  | <a href="#">Spred3</a>             | 0.917 | -1.276 | 0.241404  | 0.514329 |
| 15033 | 10546092 | <a href="#">ENSMUST00000113596</a> | <a href="#">19349</a>     | RAB7, member RAS oncogene fami  | <a href="#">Rab7</a>               | 0.917 | -1.206 | 0.265823  | 0.540907 |
| 15034 | 10537957 | <a href="#">NM_133922</a>          | <a href="#">77827</a>     | KRAB-A domain containing 1      | <a href="#">Krbal</a>              | 0.917 | -0.766 | 0.468122  | 0.720533 |
| 15035 | 10567407 | <a href="#">NM_145585</a>          | <a href="#">233802</a>    | THUMP domain containing 1       | <a href="#">Thumpd1</a>            | 0.917 | -1.613 | 0.149494  | 0.391928 |
| 15036 | 10434281 | <a href="#">ENSMUST00000074116</a> | <a href="#">635992</a>    | similar to ubiquitin-conjugati  | <a href="#">LOC635992</a>          | 0.917 | -0.974 | 0.361614  | 0.633308 |
| 15037 | 10428308 | <a href="#">AK145170</a>           | <a href="#">100038726</a> | predicted gene, ENSMUSG0000007  | <a href="#">ENSMUSG00000072615</a> | 0.917 | -2.393 | 0.046928  | 0.192513 |
| 15038 | 10585129 | <a href="#">NM_012039</a>          | <a href="#">26951</a>     | ZW10 homolog (Drosophila), cen  | <a href="#">Zw10</a>               | 0.917 | -1.383 | 0.207924  | 0.472478 |

|       |          |                                    |                        |                                |                               |       |        |           |          |
|-------|----------|------------------------------------|------------------------|--------------------------------|-------------------------------|-------|--------|-----------|----------|
| 15039 | 10593953 | <a href="#">NM_199222</a>          | <a href="#">235416</a> | lectin, mannose-binding 1 like | <a href="#">Lman1l</a>        | 0.917 | -1.207 | 0.26569   | 0.540741 |
| 15040 | 10560354 | <a href="#">XR_033421</a>          | <a href="#">666767</a> | similar to 2410004N11Rik prote | <a href="#">LOC666767</a>     | 0.917 | -2.025 | 0.0812694 | 0.272022 |
| 15041 | 10427268 | <a href="#">NM_010464</a>          | <a href="#">15422</a>  | homeo box C13                  | <a href="#">Hoxc13</a>        | 0.917 | -1.495 | 0.17729   | 0.431715 |
| 15042 | 10430382 |                                    |                        |                                |                               | 0.917 | -0.695 | 0.508552  | 0.75032  |
| 15043 | 10576728 | <a href="#">NM_026156</a>          | <a href="#">67439</a>  | XPA binding protein 2          | <a href="#">Xab2</a>          | 0.917 | -1.648 | 0.142166  | 0.382143 |
| 15044 | 10421672 | <a href="#">NM_026177</a>          | <a href="#">67467</a>  | RIKEN cDNA 1200011118 gene     | <a href="#">1200011118Rik</a> | 0.917 | -2.219 | 0.0608392 | 0.227598 |
| 15045 | 10451303 | <a href="#">BC059249</a>           | <a href="#">106763</a> | tau tubulin kinase 1           | <a href="#">Ttbk1</a>         | 0.917 | -0.695 | 0.508903  | 0.750516 |
| 15046 | 10521461 | <a href="#">NM_024478</a>          | <a href="#">17713</a>  | GrpE-like 1, mitochondrial     | <a href="#">Grpel1</a>        | 0.917 | -1.735 | 0.125001  | 0.354008 |
| 15047 | 10523647 | <a href="#">NM_001080798</a>       | <a href="#">17355</a>  | AF4/FMR2 family, member 1      | <a href="#">Aff1</a>          | 0.917 | -1.448 | 0.189521  | 0.448035 |
| 15048 | 10505276 | <a href="#">NM_175090</a>          | <a href="#">20529</a>  | solute carrier family 31, memb | <a href="#">Slc31a1</a>       | 0.917 | -2.231 | 0.059766  | 0.225177 |
| 15049 | 10535282 | <a href="#">NM_175362</a>          | <a href="#">108723</a> | caspase recruitment domain fam | <a href="#">Card11</a>        | 0.917 | -1.275 | 0.242007  | 0.51484  |
| 15050 | 10549552 | <a href="#">NM_027328</a>          | <a href="#">68988</a>  | PRP31 pre-mRNA processing fact | <a href="#">Prpf31</a>        | 0.917 | -1.772 | 0.11847   | 0.343564 |
| 15051 | 10530558 | <a href="#">AK082524</a>           | <a href="#">75991</a>  | SLAIN motif family, member 2   | <a href="#">Slain2</a>        | 0.917 | -1.259 | 0.247346  | 0.520698 |
| 15052 | 10425611 | <a href="#">NM_080633</a>          | <a href="#">11429</a>  | aconitase 2, mitochondrial     | <a href="#">Aco2</a>          | 0.917 | -1.731 | 0.125827  | 0.355111 |
| 15053 | 10477551 | <a href="#">DQ080431</a>           | <a href="#">75480</a>  | RIKEN cDNA 1700003F12 gene     | <a href="#">1700003F12Rik</a> | 0.917 | -1.816 | 0.111047  | 0.329804 |
| 15054 | 10401950 | <a href="#">NM_027076</a>          | <a href="#">69423</a>  | RIKEN cDNA 1700019M22 gene     | <a href="#">1700019M22Rik</a> | 0.917 | -0.14  | 0.892499  | 0.957747 |
| 15055 | 10444936 | <a href="#">NM_026987</a>          | <a href="#">69192</a>  | DEAH (Asp-Glu-Ala-His) box pol | <a href="#">Dhx16</a>         | 0.917 | -1.571 | 0.158956  | 0.406061 |
| 15056 | 10515115 | <a href="#">NM_145551</a>          | <a href="#">230612</a> | solute carrier family 5 (sodiu | <a href="#">Slc5a9</a>        | 0.917 | -0.933 | 0.380787  | 0.650316 |
| 15057 | 10537789 | <a href="#">NM_207028</a>          | <a href="#">387353</a> | taste receptor, type 2, member | <a href="#">Tas2r126</a>      | 0.917 | -0.842 | 0.427084  | 0.688411 |
| 15058 | 10532784 | <a href="#">NM_026805</a>          | <a href="#">68666</a>  | SV2 related protein            | <a href="#">Svop</a>          | 0.917 | -1.101 | 0.306251  | 0.582793 |
| 15059 | 10600685 | <a href="#">BC049727</a>           | <a href="#">71996</a>  | RIKEN cDNA 1600014K23 gene     | <a href="#">1600014K23Rik</a> | 0.917 | -0.817 | 0.440032  | 0.699124 |
| 15060 | 10559486 | <a href="#">NM_001113474</a>       | <a href="#">52855</a>  | leukocyte-associated Ig-like r | <a href="#">Lair1</a>         | 0.917 | -0.616 | 0.557008  | 0.785453 |
| 15061 | 10513268 | <a href="#">BC058684</a>           | <a href="#">230249</a> | expressed sequence AI314180    | <a href="#">AI314180</a>      | 0.916 | -2.342 | 0.0506562 | 0.202722 |
| 15062 | 10553897 | <a href="#">NM_172742</a>          | <a href="#">233315</a> | myotubularin related protein 1 | <a href="#">Mtmr10</a>        | 0.916 | -1.685 | 0.134623  | 0.369832 |
| 15063 | 10480633 | <a href="#">NM_080854</a>          | <a href="#">142681</a> | solute carrier family 34 (sodi | <a href="#">Slc34a3</a>       | 0.916 | -1.164 | 0.281312  | 0.556831 |
| 15064 | 10477035 | <a href="#">NM_001040689</a>       | <a href="#">228770</a> | R-spondin family, member 4     | <a href="#">Rspo4</a>         | 0.916 | -1.506 | 0.174436  | 0.427379 |
| 15065 | 10523785 | <a href="#">NM_018759</a>          | <a href="#">54367</a>  | zinc finger protein 326        | <a href="#">Zfp326</a>        | 0.916 | -2.169 | 0.065605  | 0.238752 |
| 15066 | 10374223 | <a href="#">NM_008341</a>          | <a href="#">16006</a>  | insulin-like growth factor bin | <a href="#">Igfbp1</a>        | 0.916 | -0.691 | 0.511249  | 0.752255 |
| 15067 | 10603354 | <a href="#">NM_018832</a>          | <a href="#">54634</a>  | MAGI family member, X-linked   | <a href="#">Magix</a>         | 0.916 | -0.768 | 0.466647  | 0.719708 |
| 15068 | 10481453 | <a href="#">NM_177648</a>          | <a href="#">227697</a> | dolichol kinase                | <a href="#">Dolk</a>          | 0.916 | -0.721 | 0.493592  | 0.739168 |
| 15069 | 10592878 | <a href="#">NM_009476</a>          | <a href="#">22269</a>  | uropodin 2                     | <a href="#">Upk2</a>          | 0.916 | -1.163 | 0.281672  | 0.556928 |
| 15070 | 10444719 | <a href="#">NM_057171</a>          | <a href="#">224727</a> | HLA-B-associated transcript 3  | <a href="#">Bat3</a>          | 0.916 | -1.938 | 0.0926362 | 0.294729 |
| 15071 | 10344933 |                                    |                        |                                |                               | 0.916 | -0.676 | 0.520398  | 0.75796  |
| 15072 | 10349529 | <a href="#">NM_172485</a>          | <a href="#">210417</a> | thrombospondin, type I, domain | <a href="#">Thsd7b</a>        | 0.916 | -0.731 | 0.487788  | 0.735492 |
| 15073 | 10593024 | <a href="#">NM_007648</a>          | <a href="#">12501</a>  | CD3 antigen, epsilon polypepti | <a href="#">Cd3e</a>          | 0.916 | -1.124 | 0.296898  | 0.573455 |
| 15074 | 10557450 | <a href="#">NM_175103</a>          | <a href="#">66162</a>  | bolA-like 2 (E. coli)          | <a href="#">Bola2</a>         | 0.916 | -2.132 | 0.069325  | 0.246733 |
| 15075 | 10440578 | <a href="#">NM_001081068</a>       | <a href="#">78913</a>  | zinc finger protein 294        | <a href="#">Zfp294</a>        | 0.916 | -1.671 | 0.13738   | 0.374325 |
| 15076 | 10416584 | <a href="#">XR_034373</a>          | <a href="#">219180</a> | similar to ribosomal protein S | <a href="#">LOC219180</a>     | 0.916 | -1.044 | 0.330309  | 0.606542 |
| 15077 | 10398678 | <a href="#">NM_173363</a>          | <a href="#">217869</a> | eukaryotic translation initiat | <a href="#">Eif5</a>          | 0.916 | -1.936 | 0.0928207 | 0.295128 |
| 15078 | 10448700 | <a href="#">NM_023040</a>          | <a href="#">11692</a>  | growth factor, erv1 (S. cerevi | <a href="#">Gfer</a>          | 0.916 | -1.668 | 0.138026  | 0.375747 |
| 15079 | 10419900 | <a href="#">NM_010856</a>          | <a href="#">17888</a>  | myosin, heavy polypeptide 6, c | <a href="#">Myh6</a>          | 0.916 | -0.878 | 0.408047  | 0.672572 |
| 15080 | 10504582 | <a href="#">BC111889</a>           | <a href="#">74152</a>  | RIKEN cDNA 1300002K09 gene     | <a href="#">1300002K09Rik</a> | 0.916 | -0.645 | 0.539036  | 0.772027 |
| 15081 | 10587552 |                                    |                        |                                |                               | 0.916 | -1.395 | 0.204398  | 0.467676 |
| 15082 | 10549758 | <a href="#">NM_029849</a>          | <a href="#">77043</a>  | RIKEN cDNA 4632433K11 gene     | <a href="#">4632433K11Rik</a> | 0.916 | -1.965 | 0.0888923 | 0.287567 |
| 15083 | 10413983 | <a href="#">XM_985917</a>          | <a href="#">268729</a> | gene model 626, (NCBI)         | <a href="#">Gm626</a>         | 0.916 | -1.271 | 0.243164  | 0.516159 |
| 15084 | 10569786 | <a href="#">NM_001122818</a>       | <a href="#">50767</a>  | patatin-like phospholipase dom | <a href="#">Pnpla6</a>        | 0.916 | -1.835 | 0.107914  | 0.323972 |
| 15085 | 10449602 | <a href="#">ENSMUST00000114648</a> | <a href="#">68597</a>  | RIKEN cDNA 1110021J02 gene     | <a href="#">1110021J02Rik</a> | 0.916 | -1.927 | 0.094051  | 0.297697 |
| 15086 | 10387992 | <a href="#">NM_172394</a>          | <a href="#">19069</a>  | nucleoporin 88                 | <a href="#">Nup88</a>         | 0.916 | -1.717 | 0.128375  | 0.35928  |
| 15087 | 10419717 | <a href="#">NM_146431</a>          | <a href="#">258423</a> | olfactory receptor 1510        | <a href="#">Olfr1510</a>      | 0.916 | -0.38  | 0.715238  | 0.875355 |
| 15088 | 10375608 | <a href="#">NM_170727</a>          | <a href="#">68662</a>  | secretoglobin, family 3A, memb | <a href="#">Scgb3a1</a>       | 0.916 | -1.379 | 0.209053  | 0.474049 |
| 15089 | 10507594 | <a href="#">NM_011400</a>          | <a href="#">20525</a>  | solute carrier family 2 (facil | <a href="#">Slc2a1</a>        | 0.916 | -2.043 | 0.0792291 | 0.268035 |
| 15090 | 10367379 | <a href="#">NM_021882</a>          | <a href="#">20431</a>  | silver                         | <a href="#">Si</a>            | 0.916 | -1.258 | 0.247601  | 0.520853 |

|       |          |                                    |                           |                                        |                                    |       |        |            |           |
|-------|----------|------------------------------------|---------------------------|----------------------------------------|------------------------------------|-------|--------|------------|-----------|
| 15091 | 10410452 | <a href="#">NM_175283</a>          | <a href="#">78925</a>     | steroid 5 alpha-reductase 1            | <a href="#">Srd5a1</a>             | 0.916 | -0.986 | 0.356273   | 0.628749  |
| 15092 | 10606924 |                                    |                           |                                        |                                    | 0.916 | -1.758 | 0.120931   | 0.347273  |
| 15093 | 10508608 | <a href="#">NM_026441</a>          | <a href="#">67898</a>     | penta-EF hand domain containin         | <a href="#">Pef1</a>               | 0.916 | -2.02  | 0.0819688  | 0.273497  |
| 15094 | 10405488 | <a href="#">NM_026211</a>          | <a href="#">67511</a>     | transmembrane emp24 protein tr         | <a href="#">Tmed9</a>              | 0.916 | -1.8   | 0.113683   | 0.334268  |
| 15095 | 10405119 | <a href="#">XM_914954</a>          | <a href="#">218241</a>    | gene model 270, (NCBI)                 | <a href="#">Gm270</a>              | 0.916 | -1.005 | 0.347369   | 0.621544  |
| 15096 | 10431836 | <a href="#">BC106998</a>           | <a href="#">100043315</a> | hypothetical LOC100043315              | <a href="#">LOC100043315</a>       | 0.916 | -0.585 | 0.576096   | 0.797166  |
| 15097 | 10507677 | <a href="#">NM_010657</a>          | <a href="#">16656</a>     | human immunodeficiency virus t         | <a href="#">Hivp3</a>              | 0.916 | -1.138 | 0.291333   | 0.567423  |
| 15098 | 10375265 | <a href="#">NM_176999</a>          | <a href="#">319767</a>    | ATPase, class V, type 10B              | <a href="#">Atp10b</a>             | 0.916 | -0.688 | 0.513231   | 0.753594  |
| 15099 | 10507190 | <a href="#">BC059213</a>           | <a href="#">230648</a>    | RIKEN cDNA 4732418C07                  | <a href="#">4732418C07Rik</a>      | 0.916 | -1.451 | 0.188721   | 0.446774  |
| 15100 | 10500034 | <a href="#">NM_008945</a>          | <a href="#">19172</a>     | gene<br>proteasome (prosome, macropain | <a href="#">Psmb4</a>              | 0.916 | -2.178 | 0.0647178  | 0.236951  |
| 15101 | 10374426 |                                    |                           |                                        |                                    | 0.916 | -0.951 | 0.372279   | 0.642621  |
| 15102 | 10448195 | <a href="#">NR_003549</a>          | <a href="#">73233</a>     | RIKEN cDNA 3110048L19 gene             | <a href="#">3110048L19Rik</a>      | 0.916 | -1.388 | 0.206365   | 0.470648  |
| 15103 | 10591806 | <a href="#">NM_018739</a>          | <a href="#">55934</a>     | retinitis pigmentosa 9 (human)         | <a href="#">rp9</a>                | 0.916 | -1.045 | 0.329994   | 0.606438  |
| 15104 | 10407300 | <a href="#">ENSMUST00000063230</a> | <a href="#">75161</a>     | RIKEN cDNA 4930544M13<br>gene          | <a href="#">4930544M13Rik</a>      | 0.916 | -0.686 | 0.51402    | 0.754437  |
| 15105 | 10482075 | <a href="#">NM_028921</a>          | <a href="#">74410</a>     | tubulin tyrosine ligase-like f         | <a href="#">Ttll11</a>             | 0.916 | -1.326 | 0.225329   | 0.495409  |
| 15106 | 10429218 | <a href="#">ENSMUST00000022953</a> | <a href="#">70363</a>     | RIKEN cDNA 1700010C24<br>gene          | <a href="#">1700010C24Rik</a>      | 0.916 | -1.675 | 0.136582   | 0.373064  |
| 15107 | 10553274 | <a href="#">NM_011314</a>          | <a href="#">20209</a>     | serum amyloid A 2                      | <a href="#">Saa2</a>               | 0.916 | -0.485 | 0.641813   | 0.837827  |
| 15108 | 10509277 | <a href="#">NM_027063</a>          | <a href="#">69380</a>     | RIKEN cDNA 1700013G24<br>gene          | <a href="#">1700013G24Rik</a>      | 0.916 | -0.048 | 0.962998   | 0.985606  |
| 15109 | 10499420 | <a href="#">NM_031248</a>          | <a href="#">83409</a>     | mitogen-activated protein bind         | <a href="#">Mapbpip</a>            | 0.916 | -2.186 | 0.0639731  | 0.234957  |
| 15110 | 10479775 | <a href="#">NM_015765</a>          | <a href="#">50497</a>     | heat shock protein 14                  | <a href="#">Hspa14</a>             | 0.916 | -1.97  | 0.0883196  | 0.286438  |
| 15111 | 10587010 |                                    |                           |                                        |                                    | 0.916 | -1.451 | 0.188755   | 0.446774  |
| 15112 | 10552508 | <a href="#">NM_011872</a>          | <a href="#">23993</a>     | kallikrein related-peptidase 7         | <a href="#">Klk7</a>               | 0.916 | -0.533 | 0.610304   | 0.81867   |
| 15113 | 10467637 | <a href="#">NM_027667</a>          | <a href="#">71085</a>     | Rho GTPase activating protein          | <a href="#">Arhgap19</a>           | 0.916 | -1.757 | 0.121103   | 0.347578  |
| 15114 | 10390746 |                                    |                           |                                        |                                    | 0.916 | -1.019 | 0.340982   | 0.615921  |
| 15115 | 10584602 | <a href="#">ENSMUST00000098865</a> | <a href="#">100038649</a> | predicted gene,<br>ENSMUSG0000007      | <a href="#">ENSMUSG00000074413</a> | 0.916 | -1.093 | 0.309606   | 0.586533  |
| 15116 | 10446423 | <a href="#">XM_001478639</a>       | <a href="#">71331</a>     | RIKEN cDNA 5430411C19<br>gene          | <a href="#">5430411C19Rik</a>      | 0.916 | -1.125 | 0.296525   | 0.573205  |
| 15117 | 10504417 | <a href="#">NM_027511</a>          | <a href="#">100039781</a> | RIKEN cDNA 3830408D24<br>gene          | <a href="#">3830408D24Rik</a>      | 0.916 | -0.527 | 0.61434    | 0.821474  |
| 15118 | 10449292 | <a href="#">NM_008700</a>          | <a href="#">18091</a>     | NK2 transcription factor relat         | <a href="#">Nkx2-5</a>             | 0.916 | -1.054 | 0.326015   | 0.602453  |
| 15119 | 10406459 | <a href="#">NM_025523</a>          | <a href="#">66377</a>     | NADH dehydrogenase<br>(ubiquinone)     | <a href="#">Ndufe1</a>             | 0.916 | -1.123 | 0.297469   | 0.573687  |
| 15120 | 10389668 | <a href="#">NM_146411</a>          | <a href="#">258406</a>    | olfactory receptor 462                 | <a href="#">Olf462</a>             | 0.916 | -1.144 | 0.289075   | 0.565029  |
| 15121 | 10410390 |                                    |                           |                                        |                                    | 0.916 | -0.954 | 0.371134   | 0.641955  |
| 15122 | 10374117 | <a href="#">XR_033814</a>          | <a href="#">665250</a>    | similar to RNA polymerase II t         | <a href="#">LOC665250</a>          | 0.916 | -0.729 | 0.488903   | 0.736349  |
| 15123 | 10351353 | <a href="#">NM_001113394</a>       | <a href="#">12503</a>     | CD247 antigen                          | <a href="#">Cd247</a>              | 0.916 | -1.787 | 0.115818   | 0.338426  |
| 15124 | 10563014 | <a href="#">NM_019830</a>          | <a href="#">15469</a>     | protein arginine N-methyltrans         | <a href="#">Prmt1</a>              | 0.916 | -1.444 | 0.190645   | 0.449586  |
| 15125 | 10355214 | <a href="#">NM_010497</a>          | <a href="#">15926</a>     | isocitrate dehydrogenase 1 (NA         | <a href="#">Idh1</a>               | 0.915 | -3.551 | 0.00888271 | 0.0623974 |
| 15126 | 10527870 | <a href="#">NM_013823</a>          | <a href="#">16591</a>     | klotho                                 | <a href="#">Kl</a>                 | 0.915 | -0.965 | 0.36568    | 0.636847  |
| 15127 | 10433478 |                                    |                           |                                        |                                    | 0.915 | -1.706 | 0.13052    | 0.362499  |
| 15128 | 10396170 | <a href="#">NM_028127</a>          | <a href="#">319710</a>    | FERM domain containing 6               | <a href="#">Frmf6</a>              | 0.915 | -1.069 | 0.3194     | 0.596434  |
| 15129 | 10566300 | <a href="#">NM_147121</a>          | <a href="#">259125</a>    | olfactory receptor 644                 | <a href="#">Olf644</a>             | 0.915 | -0.768 | 0.466818   | 0.71989   |
| 15130 | 10453732 | <a href="#">XR_031272</a>          | <a href="#">225134</a>    | similar to ribosomal protein S         | <a href="#">LOC225134</a>          | 0.915 | -0.673 | 0.521975   | 0.759008  |
| 15131 | 10376868 | <a href="#">NM_011706</a>          | <a href="#">22368</a>     | transient receptor potential c         | <a href="#">Trpv2</a>              | 0.915 | -0.871 | 0.411693   | 0.675585  |
| 15132 | 10406825 | <a href="#">NM_023472</a>          | <a href="#">68558</a>     | ankyrin repeat, family A (RFXA         | <a href="#">Ankra2</a>             | 0.915 | -1.755 | 0.121381   | 0.347955  |
| 15133 | 10539857 | <a href="#">AK020089</a>           | <a href="#">434064</a>    | predicted gene, EG434064               | <a href="#">EG434064</a>           | 0.915 | -1.352 | 0.217154   | 0.484774  |
| 15134 | 10391508 | <a href="#">NM_024449</a>          | <a href="#">74499</a>     | sclerostin                             | <a href="#">Sost</a>               | 0.915 | -1.339 | 0.221134   | 0.490317  |
| 15135 | 10366196 | <a href="#">NM_177373</a>          | <a href="#">327814</a>    | protein tyrosine phosphatase,          | <a href="#">Ppfia2</a>             | 0.915 | -1.161 | 0.282634   | 0.557724  |
| 15136 | 10588324 |                                    |                           |                                        |                                    | 0.915 | -1.081 | 0.314344   | 0.591167  |
| 15137 | 10452729 | <a href="#">BC046516</a>           | <a href="#">225004</a>    | cDNA sequence BC027072                 | <a href="#">BC027072</a>           | 0.915 | -1.015 | 0.343028   | 0.617132  |
| 15138 | 10528915 | <a href="#">NM_021288</a>          | <a href="#">22171</a>     | thymidylate synthase                   | <a href="#">Tyms</a>               | 0.915 | -1.956 | 0.0901864  | 0.289885  |
| 15139 | 10448416 | <a href="#">NM_027008</a>          | <a href="#">69259</a>     | potassium channel tetramerisat         | <a href="#">Kctd5</a>              | 0.915 | -1.339 | 0.221278   | 0.490585  |
| 15140 | 10583694 | <a href="#">BC057071</a>           | <a href="#">69773</a>     | RIKEN cDNA 1810026J23 gene             | <a href="#">1810026J23Rik</a>      | 0.915 | -1.358 | 0.21542    | 0.482533  |
| 15141 | 10579468 | <a href="#">BC003935</a>           | <a href="#">76478</a>     | RIKEN cDNA 2410004I 22 gene            | <a href="#">2410004I 22Rik</a>     | 0.915 | -2.46  | 0.042456   | 0.180513  |

|       |          |                                    |                           |                                |                                    |       |        |           |          |
|-------|----------|------------------------------------|---------------------------|--------------------------------|------------------------------------|-------|--------|-----------|----------|
| 15142 | 10550660 | <a href="#">NM_001010836</a>       | <a href="#">333654</a>    | protein phosphatase 1, regulat | <a href="#">Ppp1r13l</a>           | 0.915 | -1.314 | 0.229192  | 0.500215 |
| 15143 | 10511007 | <a href="#">BC117034</a>           | <a href="#">67513</a>     | RIKEN cDNA 2610002J02 gene     | <a href="#">2610002J02Rik</a>      | 0.915 | -1.174 | 0.277889  | 0.553005 |
| 15144 | 10383152 | <a href="#">ENSMUST00000093902</a> | <a href="#">672511</a>    | hypothetical LOC672511         | <a href="#">LOC672511</a>          | 0.915 | -1.339 | 0.221082  | 0.490317 |
| 15145 | 10403868 | <a href="#">XR_032236</a>          | <a href="#">665386</a>    | similar to prothymosin, alpha  | <a href="#">LOC665386</a>          | 0.915 | -1.886 | 0.10001   | 0.309109 |
| 15146 | 10581212 |                                    |                           |                                |                                    | 0.915 | -0.957 | 0.369602  | 0.640195 |
| 15147 | 10576965 |                                    |                           |                                |                                    | 0.915 | -0.947 | 0.374446  | 0.644557 |
| 15148 | 10535776 | <a href="#">NM_001039678</a>       | <a href="#">231903</a>    | parahox cluster neighbor       | <a href="#">Prhoxnb</a>            | 0.915 | -0.786 | 0.456951  | 0.712826 |
| 15149 | 10525271 | <a href="#">BC132172</a>           | <a href="#">231713</a>    | RIKEN cDNA C330023M02 gene     | <a href="#">C330023M02Rik</a>      | 0.915 | -1.552 | 0.163447  | 0.412528 |
| 15150 | 10350015 | <a href="#">NM_028320</a>          | <a href="#">72674</a>     | adiponectin receptor 1         | <a href="#">Adipor1</a>            | 0.915 | -2.248 | 0.058305  | 0.221767 |
| 15151 | 10480621 | <a href="#">BC132286</a>           | <a href="#">74472</a>     | RIKEN cDNA 4933433C11 gene     | <a href="#">4933433C11Rik</a>      | 0.915 | -1.204 | 0.266458  | 0.541209 |
| 15152 | 10365355 | <a href="#">NM_027423</a>          | <a href="#">70428</a>     | polymerase (RNA) III (DNA dire | <a href="#">Polr3b</a>             | 0.915 | -1.792 | 0.115026  | 0.337303 |
| 15153 | 10444605 | <a href="#">NM_011690</a>          | <a href="#">22321</a>     | valyl-tRNA synthetase          | <a href="#">Vars</a>               | 0.915 | -1.913 | 0.0961015 | 0.301703 |
| 15154 | 10448055 | <a href="#">NM_008799</a>          | <a href="#">18567</a>     | programmed cell death 2        | <a href="#">Pcdcd2</a>             | 0.915 | -2.37  | 0.0485999 | 0.197122 |
| 15155 | 10463282 | <a href="#">NM_053103</a>          | <a href="#">93685</a>     | ectonucleoside triphosphate di | <a href="#">Entpd7</a>             | 0.915 | -1.364 | 0.213466  | 0.479498 |
| 15156 | 10582464 |                                    |                           |                                |                                    | 0.915 | -1.993 | 0.0853183 | 0.280424 |
| 15157 | 10444713 | <a href="#">NM_032460</a>          | <a href="#">81845</a>     | HLA-B associated transcript 4  | <a href="#">Bat4</a>               | 0.915 | -1.472 | 0.183361  | 0.440466 |
| 15158 | 10383763 | <a href="#">ENSMUST00000087968</a> | <a href="#">100038445</a> | predicted gene, ENSMUSG0000006 | <a href="#">ENSMUSG00000067584</a> | 0.915 | -1.088 | 0.311617  | 0.588183 |
| 15159 | 10489179 | <a href="#">NM_010285</a>          | <a href="#">14601</a>     | growth hormone releasing hormo | <a href="#">Ghrh</a>               | 0.915 | -1.335 | 0.222597  | 0.492542 |
| 15160 | 10360662 | <a href="#">NR_003623</a>          | <a href="#">277333</a>    | predicted gene, EG277333       | <a href="#">EG277333</a>           | 0.915 | -1.65  | 0.141594  | 0.381092 |
| 15161 | 10383194 | <a href="#">ENSMUST00000093902</a> | <a href="#">672511</a>    | hypothetical LOC672511         | <a href="#">LOC672511</a>          | 0.915 | -1.198 | 0.268739  | 0.543286 |
| 15162 | 10414202 | <a href="#">NM_023134</a>          | <a href="#">20387</a>     | surfactant associated protein  | <a href="#">Sftpa1</a>             | 0.915 | -1.14  | 0.290661  | 0.567002 |
| 15163 | 10570587 | <a href="#">NM_183035</a>          | <a href="#">360211</a>    | defensin beta 34               | <a href="#">Defb34</a>             | 0.915 | -0.775 | 0.463127  | 0.71752  |
| 15164 | 10572146 | <a href="#">NM_007509</a>          | <a href="#">11966</a>     | ATPase, H+ transporting, lysos | <a href="#">Atp6v1b2</a>           | 0.915 | -1.551 | 0.163675  | 0.412879 |
| 15165 | 10477179 | <a href="#">NM_053091</a>          | <a href="#">84682</a>     | cytochrome c oxidase subunit I | <a href="#">Cox4i2</a>             | 0.915 | -1.445 | 0.19051   | 0.449454 |
| 15166 | 10398334 |                                    |                           |                                |                                    | 0.915 | -0.715 | 0.496916  | 0.741273 |
| 15167 | 10574133 |                                    |                           |                                |                                    | 0.915 | -0.787 | 0.456251  | 0.712479 |
| 15168 | 10387932 | <a href="#">NM_011072</a>          | <a href="#">18643</a>     | profilin 1                     | <a href="#">Pfn1</a>               | 0.915 | -1.783 | 0.116468  | 0.339621 |
| 15169 | 10564448 | <a href="#">NM_080443</a>          | <a href="#">117589</a>    | ankyrin repeat and SOCS box-co | <a href="#">Asb7</a>               | 0.915 | -1.072 | 0.318089  | 0.595218 |
| 15170 | 10364237 | <a href="#">ENSMUST00000099552</a> | <a href="#">100038479</a> | predicted gene, ENSMUSG0000007 | <a href="#">ENSMUSG00000074919</a> | 0.915 | -0.949 | 0.373334  | 0.643602 |
| 15171 | 10594188 | <a href="#">NM_013708</a>          | <a href="#">23958</a>     | nuclear receptor subfamily 2,  | <a href="#">Nr2e3</a>              | 0.915 | -1.062 | 0.322606  | 0.599294 |
| 15172 | 10552380 | <a href="#">NM_172900</a>          | <a href="#">243958</a>    | sialic acid binding Ig-like le | <a href="#">Siglecg</a>            | 0.915 | -0.807 | 0.445407  | 0.703573 |
| 15173 | 10606910 | <a href="#">NM_001082412</a>       | <a href="#">67062</a>     | mitochondrial carrier triple r | <a href="#">Mcart6</a>             | 0.915 | -1.139 | 0.291108  | 0.567231 |
| 15174 | 10515698 | <a href="#">ENSMUST00000075406</a> | <a href="#">230676</a>    | cDNA sequence BC059842         | <a href="#">BC059842</a>           | 0.915 | -1.53  | 0.168673  | 0.420172 |
| 15175 | 10349580 | <a href="#">NM_011082</a>          | <a href="#">18703</a>     | polymeric immunoglobulin recep | <a href="#">Pigr</a>               | 0.915 | -0.499 | 0.632381  | 0.832782 |
| 15176 | 10482712 | <a href="#">NM_019667</a>          | <a href="#">56324</a>     | signal transducing adaptor mol | <a href="#">Stam2</a>              | 0.915 | -2.01  | 0.0831229 | 0.276258 |
| 15177 | 10397143 | <a href="#">ENSMUST00000053744</a> | <a href="#">71952</a>     | RIKEN cDNA 2410016O06 gene     | <a href="#">2410016O06Rik</a>      | 0.915 | -1.919 | 0.0952153 | 0.2999   |
| 15178 | 10596322 | <a href="#">BC048436</a>           | <a href="#">73532</a>     | RIKEN cDNA 1700080E11 gene     | <a href="#">1700080E11Rik</a>      | 0.915 | -0.75  | 0.477076  | 0.727851 |
| 15179 | 10488048 | <a href="#">NM_021527</a>          | <a href="#">59030</a>     | McKusick-Kaufman syndrome prot | <a href="#">Mkks</a>               | 0.915 | -1.468 | 0.18429   | 0.44191  |
| 15180 | 10368635 | <a href="#">NM_001081165</a>       | <a href="#">270711</a>    | RIKEN cDNA 4732454E20 gene     | <a href="#">4732454E20Rik</a>      | 0.915 | -1.454 | 0.188055  | 0.446224 |
| 15181 | 10442468 | <a href="#">NM_027937</a>          | <a href="#">268932</a>    | CASK interacting protein 1     | <a href="#">Caskin1</a>            | 0.915 | -1.022 | 0.339673  | 0.615113 |
| 15182 | 10378964 | <a href="#">NM_021286</a>          | <a href="#">20370</a>     | seizure related gene 6         | <a href="#">Sez6</a>               | 0.915 | -1.072 | 0.318102  | 0.595218 |
| 15183 | 10403973 | <a href="#">ENSMUST00000017126</a> | <a href="#">195236</a>    | gene model 24, (NCBI)          | <a href="#">Gm24</a>               | 0.915 | -0.859 | 0.41795   | 0.680624 |
| 15184 | 10455599 |                                    |                           |                                |                                    | 0.915 | -0.754 | 0.474511  | 0.726086 |
| 15185 | 10359851 | <a href="#">NM_030724</a>          | <a href="#">80914</a>     | uridine-cytidine kinase 2      | <a href="#">Uck2</a>               | 0.915 | -1.109 | 0.302928  | 0.579019 |
| 15186 | 10518059 | <a href="#">NM_001033875</a>       | <a href="#">76701</a>     | chymotrypsin C (caldecrin)     | <a href="#">Ctre</a>               | 0.915 | -0.904 | 0.394942  | 0.662592 |
| 15187 | 10436800 | <a href="#">ENSMUST00000060246</a> | <a href="#">68500</a>     | RIKEN cDNA 1110008E08 gene     | <a href="#">1110008E08Rik</a>      | 0.915 | -0.679 | 0.51831   | 0.756954 |
| 15188 | 10571857 |                                    |                           |                                |                                    | 0.915 | -0.938 | 0.378705  | 0.648368 |
| 15189 | 10598474 | <a href="#">NM_078484</a>          | <a href="#">22232</a>     | solute carrier family 35 (UDP- | <a href="#">Slc35a2</a>            | 0.915 | -1.044 | 0.330171  | 0.606529 |
| 15190 | 10504992 | <a href="#">ENSMUST00000107666</a> | <a href="#">73398</a>     | RIKEN cDNA 1700054F22 gene     | <a href="#">1700054F22Rik</a>      | 0.915 | -1.298 | 0.23419   | 0.505444 |
| 15191 | 10454095 |                                    |                           |                                |                                    | 0.914 | -0.575 | 0.582776  | 0.800924 |
| 15192 | 10365005 | <a href="#">NM_007828</a>          | <a href="#">13144</a>     | death-associated kinase 3      | <a href="#">Dank3</a>              | 0.914 | -0.992 | 0.353209  | 0.625979 |

|       |          |                                    |                           |                                    |                                    |       |        |           |          |
|-------|----------|------------------------------------|---------------------------|------------------------------------|------------------------------------|-------|--------|-----------|----------|
| 15193 | 10363498 | <a href="#">NM_026438</a>          | <a href="#">67895</a>     | pyrophosphatase (inorganic) 1      | <a href="#">Ppa1</a>               | 0.914 | -1.342 | 0.220299  | 0.488992 |
| 15194 | 10440964 | <a href="#">NM_133679</a>          | <a href="#">66609</a>     | crystallin, zeta (quinone redu     | <a href="#">Cryz11</a>             | 0.914 | -1.977 | 0.0873523 | 0.284457 |
| 15195 | 10450055 | <a href="#">NM_010385</a>          | <a href="#">14976</a>     | H2-K region expressed gene 2       | <a href="#">H2-Ke2</a>             | 0.914 | -2.288 | 0.0548634 | 0.213516 |
| 15196 | 10519314 |                                    |                           |                                    |                                    | 0.914 | -0.738 | 0.483612  | 0.732303 |
| 15197 | 10542156 | <a href="#">NM_053109</a>          | <a href="#">93694</a>     | C-type lectin domain family 2,     | <a href="#">Clec2d</a>             | 0.914 | -0.004 | 0.996797  | 0.998781 |
| 15198 | 10606948 | <a href="#">NM_029413</a>          | <a href="#">75746</a>     | microorchidia 4                    | <a href="#">Morc4</a>              | 0.914 | -1.075 | 0.317199  | 0.594448 |
| 15199 | 10563649 | <a href="#">NM_001040695</a>       | <a href="#">54122</a>     | UEV and lactate/malate dehyrog     | <a href="#">Uevld</a>              | 0.914 | -1.141 | 0.290327  | 0.566507 |
| 15200 | 10452228 | <a href="#">NM_010613</a>          | <a href="#">16549</a>     | KH-type splicing regulatory pr     | <a href="#">Khsrp</a>              | 0.914 | -2.124 | 0.0701648 | 0.248254 |
| 15201 | 10575302 | <a href="#">NM_009677</a>          | <a href="#">11765</a>     | adaptor protein complex AP-1,      | <a href="#">Aplg1</a>              | 0.914 | -2.147 | 0.0677428 | 0.243242 |
| 15202 | 10405929 | <a href="#">AK154519</a>           | <a href="#">100038627</a> | predicted gene,<br>ENSMUSG0000007  | <a href="#">ENSMUSG00000074823</a> | 0.914 | -1.289 | 0.237101  | 0.509272 |
| 15203 | 10562784 | <a href="#">NM_178067</a>          | <a href="#">233199</a>    | myosin binding protein C, fast     | <a href="#">Mybpc2</a>             | 0.914 | -1.687 | 0.134198  | 0.369304 |
| 15204 | 10477485 | <a href="#">BC115526</a>           | <a href="#">67135</a>     | RIKEN cDNA 2310021H06<br>gene      | <a href="#">2310021H06Rik</a>      | 0.914 | -0.545 | 0.602207  | 0.813667 |
| 15205 | 10574308 | <a href="#">NM_028805</a>          | <a href="#">74187</a>     | katanin p80 (WD40-containing)      | <a href="#">Katnb1</a>             | 0.914 | -1.613 | 0.149423  | 0.39184  |
| 15206 | 10363599 | <a href="#">NM_027425</a>          | <a href="#">70432</a>     | RUN and FYVE domain-<br>containing | <a href="#">Rufy2</a>              | 0.914 | -1.858 | 0.104346  | 0.317818 |
| 15207 | 10352586 | <a href="#">NM_021408</a>          | <a href="#">22283</a>     | Usher syndrome 2A (autosomal r     | <a href="#">Ush2a</a>              | 0.914 | -1.25  | 0.250453  | 0.524406 |
| 15208 | 10393904 | <a href="#">NM_175263</a>          | <a href="#">77583</a>     | notum pectinacylesterase hom       | <a href="#">Notum</a>              | 0.914 | -0.745 | 0.479887  | 0.729876 |
| 15209 | 10548359 | <a href="#">BC117712</a>           | <a href="#">71183</a>     | C-type lectin domain family 12     | <a href="#">Clec12b</a>            | 0.914 | -1.574 | 0.158186  | 0.405072 |
| 15210 | 10392437 | <a href="#">ENSMUST00000070956</a> | <a href="#">100036768</a> | predicted gene,<br>OTTMUSG0000000  | <a href="#">OTTMUSG00000003456</a> | 0.914 | -1.262 | 0.246126  | 0.51906  |
| 15211 | 10593740 | <a href="#">NM_001025375</a>       | <a href="#">66317</a>     | WD repeat domain 61                | <a href="#">Wdr61</a>              | 0.914 | -2.144 | 0.0680839 | 0.243829 |
| 15212 | 10588195 | <a href="#">ENSMUST00000078519</a> | <a href="#">442798</a>    | RIKEN cDNA 9630041A04<br>gene      | <a href="#">9630041A04Rik</a>      | 0.914 | -0.405 | 0.697473  | 0.867333 |
| 15213 | 10393064 | <a href="#">NM_001009573</a>       | <a href="#">70450</a>     | unc-13 homolog D (C. elegans)      | <a href="#">Unc13d</a>             | 0.914 | -1.683 | 0.134933  | 0.370281 |
| 15214 | 10603453 | <a href="#">NM_026137</a>          | <a href="#">73447</a>     | WD repeat domain 13                | <a href="#">Wdr13</a>              | 0.914 | -1.376 | 0.210177  | 0.475495 |
| 15215 | 10489522 | <a href="#">NM_001012723</a>       | <a href="#">277345</a>    | WAP four-disulfide core domain     | <a href="#">Wfdc16</a>             | 0.914 | -1.094 | 0.309301  | 0.586062 |
| 15216 | 10544891 | <a href="#">NM_172729</a>          | <a href="#">107607</a>    | nucleotide-binding oligomeriza     | <a href="#">Nod1</a>               | 0.914 | -1.185 | 0.273578  | 0.548314 |
| 15217 | 10382462 | <a href="#">NM_012030</a>          | <a href="#">26941</a>     | solute carrier family 9 (sodiu     | <a href="#">Slc9a3r1</a>           | 0.914 | -1.418 | 0.19802   | 0.458849 |
| 15218 | 10438517 | <a href="#">NM_145939</a>          | <a href="#">208624</a>    | asparagine-linked glycosylatio     | <a href="#">Alg3</a>               | 0.914 | -2.067 | 0.0764094 | 0.262018 |
| 15219 | 10488106 | <a href="#">XM_001005575</a>       | <a href="#">269365</a>    | similar to ribosomal protein S     | <a href="#">LOC269365</a>          | 0.914 | -1.155 | 0.284934  | 0.560276 |
| 15220 | 10457007 | <a href="#">NM_025861</a>          | <a href="#">66943</a>     | PQ loop repeat containing 1        | <a href="#">Pqlc1</a>              | 0.914 | -1.251 | 0.250134  | 0.524217 |
| 15221 | 10436034 |                                    |                           |                                    |                                    | 0.914 | -1.177 | 0.276725  | 0.551883 |
| 15222 | 10547191 | <a href="#">BC093486</a>           | <a href="#">319776</a>    | RIKEN cDNA C230095G01<br>gene      | <a href="#">C230095G01Rik</a>      | 0.914 | -0.864 | 0.415236  | 0.678399 |
| 15223 | 10419034 | <a href="#">AK012157</a>           | <a href="#">70045</a>     | RIKEN cDNA 2610528A11<br>gene      | <a href="#">2610528A11Rik</a>      | 0.914 | -0.924 | 0.385508  | 0.654661 |
| 15224 | 10590029 |                                    |                           |                                    |                                    | 0.914 | -0.563 | 0.590758  | 0.806356 |
| 15225 | 10551314 | <a href="#">BC024978</a>           | <a href="#">414069</a>    | cDNA sequence BC024978             | <a href="#">BC024978</a>           | 0.914 | -0.88  | 0.407012  | 0.671546 |
| 15226 | 10466272 | <a href="#">NM_001011775</a>       | <a href="#">257938</a>    | olfactory receptor 1419            | <a href="#">Olfr1419</a>           | 0.914 | -0.539 | 0.606403  | 0.816622 |
| 15227 | 10413138 | <a href="#">NM_011695</a>          | <a href="#">22334</a>     | voltage-dependent anion channe     | <a href="#">Vdac2</a>              | 0.914 | -2.245 | 0.0585319 | 0.222381 |
| 15228 | 10406426 | <a href="#">NM_007684</a>          | <a href="#">12626</a>     | centrin 3                          | <a href="#">Cetn3</a>              | 0.914 | -1.95  | 0.0909512 | 0.291551 |
| 15229 | 10366303 |                                    |                           |                                    |                                    | 0.914 | -1.133 | 0.293639  | 0.56967  |
| 15230 | 10545742 | <a href="#">NM_144943</a>          | <a href="#">246278</a>    | CD 207 antigen                     | <a href="#">Cd207</a>              | 0.914 | -1.037 | 0.333222  | 0.609187 |
| 15231 | 10448369 | <a href="#">NM_153791</a>          | <a href="#">224613</a>    | FLYWCH-type zinc finger 1          | <a href="#">Flywch1</a>            | 0.914 | -1.57  | 0.159208  | 0.406366 |
| 15232 | 10540542 | <a href="#">XM_917008</a>          | <a href="#">620161</a>    | predicted gene, EG620161           | <a href="#">EG620161</a>           | 0.914 | -1.141 | 0.290227  | 0.566365 |
| 15233 | 10422606 |                                    |                           |                                    |                                    | 0.914 | -0.895 | 0.399454  | 0.665621 |
| 15234 | 10593035 | <a href="#">NM_145403</a>          | <a href="#">214523</a>    | transmembrane protease, serine     | <a href="#">Tmprss4</a>            | 0.914 | -1.052 | 0.326579  | 0.602834 |
| 15235 | 10362064 | <a href="#">BC099546</a>           | <a href="#">67692</a>     | RIKEN cDNA 1700020N01<br>gene      | <a href="#">1700020N01Rik</a>      | 0.914 | -0.925 | 0.385108  | 0.654297 |
| 15236 | 10499329 | <a href="#">NM_021375</a>          | <a href="#">58176</a>     | Rhesus blood group-associated      | <a href="#">Rhbg</a>               | 0.914 | -0.734 | 0.485969  | 0.734018 |
| 15237 | 10517058 | <a href="#">AK051860</a>           | <a href="#">100036542</a> | predicted gene,<br>ENSMUSG0000005  | <a href="#">ENSMUSG00000056524</a> | 0.914 | -0.949 | 0.373554  | 0.643666 |
| 15238 | 10389130 | <a href="#">AK005634</a>           | <a href="#">76392</a>     | RIKEN cDNA 1700003F17 gene         | <a href="#">1700003F17Rik</a>      | 0.914 | -1.661 | 0.13937   | 0.377524 |
| 15239 | 10359734 | <a href="#">ENSMUST00000027856</a> | <a href="#">74106</a>     | IQ motif and WD repeats 1          | <a href="#">Iqwd1</a>              | 0.914 | -0.842 | 0.426697  | 0.68818  |
| 15240 | 10427131 | <a href="#">NM_146064</a>          | <a href="#">223920</a>    | sterol O-acyltransferase 2         | <a href="#">Soat2</a>              | 0.914 | -0.868 | 0.413509  | 0.677091 |
| 15241 | 10534384 | <a href="#">NM_029681</a>          | <a href="#">76629</a>     | Williams-Beuren syndrome<br>chrom  | <a href="#">Wbscr28</a>            | 0.914 | -0.949 | 0.373096  | 0.643427 |

|       |          |                                    |                           |                                   |                                    |       |        |           |          |
|-------|----------|------------------------------------|---------------------------|-----------------------------------|------------------------------------|-------|--------|-----------|----------|
| 15242 | 10459066 | <a href="#">ENSMUST00000090260</a> | <a href="#">100044195</a> | hypothetical protein LOC100044    | <a href="#">LOC100044195</a>       | 0.914 | -0.705 | 0.502943  | 0.745637 |
| 15243 | 10364385 | <a href="#">NM_173751</a>          | <a href="#">216136</a>    | ilvB (bacterial acetolactate s    | <a href="#">Ilvbl</a>              | 0.914 | -1.616 | 0.148832  | 0.391099 |
| 15244 | 10398332 |                                    |                           |                                   |                                    | 0.914 | -1.08  | 0.314827  | 0.59176  |
| 15245 | 10586064 | <a href="#">NM_009672</a>          | <a href="#">11737</a>     | acidic (leucine-rich) nuclear     | <a href="#">Anp32a</a>             | 0.914 | -1.77  | 0.118781  | 0.344229 |
| 15246 | 10382345 | <a href="#">NM_013581</a>          | <a href="#">16834</a>     | component of oligomeric golgi     | <a href="#">Cog1</a>               | 0.914 | -1.796 | 0.114275  | 0.335588 |
| 15247 | 10571250 | <a href="#">BC090989</a>           | <a href="#">628431</a>    | high mobility group box 1, rel    | <a href="#">Hmgb1-rs17</a>         | 0.914 | -0.903 | 0.395732  | 0.663394 |
| 15248 | 10368064 | <a href="#">ENSMUST00000095817</a> | <a href="#">100039660</a> | hypothetical protein LOC100039    | <a href="#">LOC100039660</a>       | 0.914 | -1.403 | 0.202065  | 0.464803 |
| 15249 | 10519642 | <a href="#">XR_034137</a>          | <a href="#">242809</a>    | similar to Ribosomal protein L    | <a href="#">LOC242809</a>          | 0.914 | -1.657 | 0.140318  | 0.378815 |
| 15250 | 10512774 | <a href="#">NM_178893</a>          | <a href="#">107684</a>    | coronin, actin binding protein    | <a href="#">Coro2a</a>             | 0.914 | -1.262 | 0.246122  | 0.51906  |
| 15251 | 10350090 | <a href="#">NM_026024</a>          | <a href="#">67196</a>     | ubiquitin-conjugating enzyme E    | <a href="#">Ube2t</a>              | 0.913 | -2.081 | 0.07481   | 0.258759 |
| 15252 | 10571312 | <a href="#">NM_176933</a>          | <a href="#">319520</a>    | dual specificity phosphatase 4    | <a href="#">Dusp4</a>              | 0.913 | -1.641 | 0.143593  | 0.384223 |
| 15253 | 10568581 | <a href="#">NM_009123</a>          | <a href="#">20231</a>     | NK1 transcription factor relat    | <a href="#">Nkx1-2</a>             | 0.913 | -1.339 | 0.221085  | 0.490317 |
| 15254 | 10532241 | <a href="#">NM_174870</a>          | <a href="#">231583</a>    | solute carrier family 26 (sulf    | <a href="#">Slc26a1</a>            | 0.913 | -1.083 | 0.313847  | 0.590663 |
| 15255 | 10565089 | <a href="#">NM_007755</a>          | <a href="#">12877</a>     | cytoplasmic polyadenylation el    | <a href="#">Cpeb1</a>              | 0.913 | -1.085 | 0.312743  | 0.589203 |
| 15256 | 10389990 | <a href="#">NM_027984</a>          | <a href="#">71889</a>     | epsin 3                           | <a href="#">Epn3</a>               | 0.913 | -1.879 | 0.101135  | 0.311419 |
| 15257 | 10601335 | <a href="#">BC035042</a>           | <a href="#">67683</a>     | RIKEN cDNA 2610029G23<br>gene     | <a href="#">2610029G23Rik</a>      | 0.913 | -1.638 | 0.14416   | 0.385253 |
| 15258 | 10489719 | <a href="#">NM_001007581</a>       | <a href="#">381406</a>    | RIKEN cDNA 2810408M09<br>gene     | <a href="#">2810408M09Rik</a>      | 0.913 | -1.524 | 0.170105  | 0.421852 |
| 15259 | 10471294 | <a href="#">NM_145521</a>          | <a href="#">227721</a>    | phosphatidic acid phosphatase     | <a href="#">Ppapdc3</a>            | 0.913 | -1.549 | 0.164037  | 0.413545 |
| 15260 | 10354168 | <a href="#">NM_018775</a>          | <a href="#">54610</a>     | TBC1 domain family, member 8      | <a href="#">Tbc1d8</a>             | 0.913 | -2.034 | 0.0802518 | 0.270212 |
| 15261 | 10446341 | <a href="#">AK132847</a>           | <a href="#">75039</a>     | RIKEN cDNA 4930505H01<br>gene     | <a href="#">4930505H01Rik</a>      | 0.913 | -1.204 | 0.266612  | 0.541262 |
| 15262 | 10605328 | <a href="#">NM_025473</a>          | <a href="#">66294</a>     | RIKEN cDNA 1810037C20<br>gene     | <a href="#">1810037C20Rik</a>      | 0.913 | -1.888 | 0.0996886 | 0.308576 |
| 15263 | 10563731 |                                    |                           |                                   |                                    | 0.913 | -1.188 | 0.272422  | 0.547018 |
| 15264 | 10353878 | <a href="#">NM_153502</a>          | <a href="#">78321</a>     | ankyrin repeat domain 23          | <a href="#">Ankrd23</a>            | 0.913 | -0.715 | 0.496846  | 0.741257 |
| 15265 | 10564480 |                                    |                           |                                   |                                    | 0.913 | -1.134 | 0.292957  | 0.569014 |
| 15266 | 10419563 | <a href="#">NM_011271</a>          | <a href="#">19752</a>     | ribonuclease, RNase A family,     | <a href="#">Rnase1</a>             | 0.913 | -0.75  | 0.476909  | 0.727649 |
| 15267 | 10383389 | <a href="#">NM_027204</a>          | <a href="#">56282</a>     | mitochondrial ribosomal protei    | <a href="#">Mrpl12</a>             | 0.913 | -2.351 | 0.049948  | 0.200971 |
| 15268 | 10514333 | <a href="#">ENSMUST00000057837</a> | <a href="#">75246</a>     | RIKEN cDNA 4930553M12<br>gene     | <a href="#">4930553M12Rik</a>      | 0.913 | -0.805 | 0.446276  | 0.704033 |
| 15269 | 10487564 | <a href="#">NM_020594</a>          | <a href="#">57432</a>     | zinc finger CCCH type containi    | <a href="#">Zc3h8</a>              | 0.913 | -1.266 | 0.244756  | 0.517875 |
| 15270 | 10606816 | <a href="#">ENSMUST00000033786</a> | <a href="#">75829</a>     | preferentially expressed antig    | <a href="#">Prame</a>              | 0.913 | -1.894 | 0.0988256 | 0.306883 |
| 15271 | 10493435 | <a href="#">NM_001077411</a>       | <a href="#">14466</a>     | glucosidase, beta, acid           | <a href="#">Gba</a>                | 0.913 | -1.615 | 0.149055  | 0.391409 |
| 15272 | 10368947 | <a href="#">NM_172393</a>          | <a href="#">11630</a>     | absent in melanoma 1              | <a href="#">Aim1</a>               | 0.913 | -1.613 | 0.149578  | 0.392051 |
| 15273 | 10442924 | <a href="#">AK052760</a>           | <a href="#">240054</a>    | RIKEN cDNA gene<br>D630044L22 gen | <a href="#">D630044L22Rik</a>      | 0.913 | -1.562 | 0.161011  | 0.40889  |
| 15274 | 10364381 | <a href="#">ENSMUST00000095474</a> | <a href="#">258224</a>    | olfactory receptor 1358           | <a href="#">Olfr1358</a>           | 0.913 | -0.635 | 0.545069  | 0.77708  |
| 15275 | 10460202 | <a href="#">NM_144871</a>          | <a href="#">225888</a>    | suppressor of variegation 4-20    | <a href="#">Suv420h1</a>           | 0.913 | -1.734 | 0.12534   | 0.354588 |
| 15276 | 10567546 | <a href="#">NM_016669</a>          | <a href="#">12971</a>     | crystallin, mu                    | <a href="#">Crym</a>               | 0.913 | -1.051 | 0.327174  | 0.603382 |
| 15277 | 10533367 | <a href="#">NM_028037</a>          | <a href="#">71985</a>     | acyl-Coenzyme A<br>dehydrogenase  | <a href="#">Acad10</a>             | 0.913 | -0.814 | 0.441788  | 0.700657 |
| 15278 | 10500054 | <a href="#">NM_008951</a>          | <a href="#">19185</a>     | proteasome (prosome, macropain    | <a href="#">Psmc4</a>              | 0.913 | -2.402 | 0.0463189 | 0.191233 |
| 15279 | 10555039 | <a href="#">NM_001039039</a>       | <a href="#">622320</a>    | potassium channel tetramerisat    | <a href="#">Kctd21</a>             | 0.913 | -0.902 | 0.396107  | 0.663738 |
| 15280 | 10570972 | <a href="#">ENSMUST00000066740</a> | <a href="#">208924</a>    | RIKEN cDNA A730045E13<br>gene     | <a href="#">A730045E13Rik</a>      | 0.913 | -0.795 | 0.451728  | 0.708709 |
| 15281 | 10448707 | <a href="#">NM_145396</a>          | <a href="#">213773</a>    | transducin (beta)-like 3          | <a href="#">Tbl3</a>               | 0.913 | -1.632 | 0.145431  | 0.387083 |
| 15282 | 10344624 | <a href="#">NM_008866</a>          | <a href="#">18777</a>     | lysophospholipase 1               | <a href="#">Lypla1</a>             | 0.913 | -2.074 | 0.0756056 | 0.260007 |
| 15283 | 10507213 | <a href="#">NM_175308</a>          | <a href="#">100465</a>    | MOB1, Mps One Binder kinase<br>ac | <a href="#">Mobk12c</a>            | 0.913 | -1.392 | 0.205399  | 0.469103 |
| 15284 | 10519196 | <a href="#">NM_147776</a>          | <a href="#">246228</a>    | von Willebrand factor A domain    | <a href="#">Vwa1</a>               | 0.913 | -0.89  | 0.402379  | 0.667444 |
| 15285 | 10541507 | <a href="#">NM_009645</a>          | <a href="#">11628</a>     | activation-induced cytidine de    | <a href="#">Aicda</a>              | 0.913 | -1.144 | 0.2891    | 0.565029 |
| 15286 | 10395610 | <a href="#">XM_001473056</a>       | <a href="#">100039525</a> | similar to ribosomal protein S    | <a href="#">LOC100039525</a>       | 0.913 | -1.046 | 0.32955   | 0.60586  |
| 15287 | 10557519 | <a href="#">NM_172746</a>          | <a href="#">233876</a>    | HIRA interacting protein 3        | <a href="#">Hirip3</a>             | 0.913 | -1.494 | 0.177628  | 0.43207  |
| 15288 | 10526229 | <a href="#">ENSMUST00000100641</a> | <a href="#">100038504</a> | predicted gene,<br>ENSMUSG0000007 | <a href="#">ENSMUSG00000072573</a> | 0.913 | -1.173 | 0.278197  | 0.553196 |
| 15289 | 10346074 | <a href="#">NM_028599</a>          | <a href="#">73674</a>     | WD repeat domain 75               | <a href="#">Wdr75</a>              | 0.913 | -1.95  | 0.0909012 | 0.291551 |
| 15290 | 10409352 | <a href="#">NM_134064</a>          | <a href="#">105239</a>    | ring finger protein 44            | <a href="#">Rnf44</a>              | 0.913 | -1.807 | 0.112527  | 0.33223  |

|       |          |                                    |                           |                                |                                    |       |        |           |          |
|-------|----------|------------------------------------|---------------------------|--------------------------------|------------------------------------|-------|--------|-----------|----------|
| 15291 | 10428918 | <a href="#">AK139928</a>           | <a href="#">399603</a>    | RIKEN cDNA D330050I23 gene     | <a href="#">D330050I23Rik</a>      | 0.913 | -1.32  | 0.227291  | 0.498027 |
| 15292 | 10509601 | <a href="#">NM_029857</a>          | <a href="#">77056</a>     | transmembrane and coiled-coil  | <a href="#">Tmco4</a>              | 0.913 | -1.539 | 0.16642   | 0.417266 |
| 15293 | 10607495 | <a href="#">XR_031668</a>          | <a href="#">640803</a>    | similar to ribosomal protein L | <a href="#">LOC640803</a>          | 0.913 | -1.059 | 0.323812  | 0.600286 |
| 15294 | 10584187 | <a href="#">ENSMUST00000093873</a> | <a href="#">78934</a>     | RIKEN cDNA 4930581F22 gene     | <a href="#">4930581F22Rik</a>      | 0.913 | -1.703 | 0.131104  | 0.36355  |
| 15295 | 10550487 | <a href="#">NM_153749</a>          | <a href="#">266815</a>    | MHC I like leukocyte 1         | <a href="#">Mill1</a>              | 0.913 | -0.49  | 0.63841   | 0.835923 |
| 15296 | 10390936 | <a href="#">NM_026834</a>          | <a href="#">68768</a>     | RIKEN cDNA 1110054P19 gene     | <a href="#">1110054P19Rik</a>      | 0.913 | -0.873 | 0.411038  | 0.675081 |
| 15297 | 10608184 | <a href="#">NM_009571</a>          | <a href="#">22768</a>     | zinc finger protein 2, Y linke | <a href="#">Zfy2</a>               | 0.913 | -1.249 | 0.25068   | 0.524426 |
| 15298 | 10415144 | <a href="#">NM_026890</a>          | <a href="#">68966</a>     | neuroguidin, EIF4E binding pro | <a href="#">Ngn</a>                | 0.913 | -2.579 | 0.0355871 | 0.160643 |
| 15299 | 10388194 | <a href="#">BC025823</a>           | <a href="#">216892</a>    | spinster homolog 2 (Drosophila | <a href="#">Spns2</a>              | 0.913 | -0.674 | 0.521463  | 0.758794 |
| 15300 | 10548116 | <a href="#">BC049086</a>           | <a href="#">12444</a>     | cyclin D2                      | <a href="#">Cend2</a>              | 0.913 | -1.26  | 0.246841  | 0.520152 |
| 15301 | 10395869 | <a href="#">BC100489</a>           | <a href="#">70846</a>     | RIKEN cDNA 4921506M07 gene     | <a href="#">4921506M07Rik</a>      | 0.913 | -0.462 | 0.657821  | 0.846971 |
| 15302 | 10474371 | <a href="#">ENSMUST00000104890</a> | <a href="#">791267</a>    | predicted gene, ENSMUSG0000005 | <a href="#">ENSMUSG00000055181</a> | 0.913 | -0.807 | 0.445192  | 0.70357  |
| 15303 | 10432431 | <a href="#">NM_001081254</a>       | <a href="#">545136</a>    | predicted gene, EG545136       | <a href="#">EG545136</a>           | 0.913 | -1.557 | 0.1621    | 0.410473 |
| 15304 | 10415678 | <a href="#">NM_026908</a>          | <a href="#">69008</a>     | calcium binding protein 39-lik | <a href="#">Cab39l</a>             | 0.913 | -1.417 | 0.19807   | 0.458849 |
| 15305 | 10436779 | <a href="#">XR_034815</a>          | <a href="#">100048581</a> | similar to myosin regulatory 1 | <a href="#">LOC100048581</a>       | 0.913 | -1.464 | 0.185388  | 0.443222 |
| 15306 | 10499529 | <a href="#">NM_009057</a>          | <a href="#">19729</a>     | recombination activating gene  | <a href="#">Rag1ap1</a>            | 0.913 | -1.754 | 0.121626  | 0.348228 |
| 15307 | 10591194 | <a href="#">NM_146523</a>          | <a href="#">258516</a>    | olfactory receptor 850         | <a href="#">Olf850</a>             | 0.913 | -0.972 | 0.362729  | 0.634161 |
| 15308 | 10371032 | <a href="#">NM_145217</a>          | <a href="#">208666</a>    | DIRAS family, GTP-binding RAS- | <a href="#">Diras1</a>             | 0.912 | -0.756 | 0.473518  | 0.725091 |
| 15309 | 10396730 |                                    |                           |                                |                                    | 0.912 | -0.97  | 0.363572  | 0.6349   |
| 15310 | 10574866 | <a href="#">NM_001047436</a>       | <a href="#">56513</a>     | par-6 (partitioning defective  | <a href="#">Pard6a</a>             | 0.912 | -1.19  | 0.271882  | 0.546343 |
| 15311 | 10505534 | <a href="#">XR_033232</a>          | <a href="#">636266</a>    | similar to 3-hydroxyisobutyrat | <a href="#">LOC636266</a>          | 0.912 | -1.105 | 0.304833  | 0.581243 |
| 15312 | 10525766 | <a href="#">NM_181410</a>          | <a href="#">209357</a>    | general transcription factor I | <a href="#">Gtf2h3</a>             | 0.912 | -1.225 | 0.259132  | 0.533348 |
| 15313 | 10454877 | <a href="#">NM_008989</a>          | <a href="#">19290</a>     | purine rich element binding pr | <a href="#">Pura</a>               | 0.912 | -1.487 | 0.17931   | 0.434671 |
| 15314 | 10559644 | <a href="#">BC022651</a>           | <a href="#">330460</a>    | cDNA sequence BC022651         | <a href="#">BC022651</a>           | 0.912 | -1.466 | 0.184873  | 0.44244  |
| 15315 | 10442083 |                                    |                           |                                |                                    | 0.912 | -0.693 | 0.509977  | 0.75132  |
| 15316 | 10543333 | <a href="#">NM_013930</a>          | <a href="#">30956</a>     | aminoadipate-semialdehyde synt | <a href="#">Aass</a>               | 0.912 | -1.953 | 0.090601  | 0.290914 |
| 15317 | 10527024 | <a href="#">ENSMUST00000081114</a> | <a href="#">791272</a>    | predicted gene, ENSMUSG0000006 | <a href="#">ENSMUSG00000060929</a> | 0.912 | -1.12  | 0.29843   | 0.574644 |
| 15318 | 10453248 |                                    |                           |                                |                                    | 0.912 | -0.823 | 0.437086  | 0.696491 |
| 15319 | 10554005 | <a href="#">NM_024439</a>          | <a href="#">109815</a>    | histocompatibility 47          | <a href="#">H47</a>                | 0.912 | -2.741 | 0.0280323 | 0.137362 |
| 15320 | 10414065 | <a href="#">NM_013473</a>          | <a href="#">11752</a>     | annexin A8                     | <a href="#">Anxa8</a>              | 0.912 | -0.782 | 0.45935   | 0.714207 |
| 15321 | 10510804 | <a href="#">ENSMUST00000097769</a> | <a href="#">100044224</a> | hypothetical protein LOC100044 | <a href="#">LOC100044224</a>       | 0.912 | -1.175 | 0.277489  | 0.552625 |
| 15322 | 10551319 | <a href="#">NM_133770</a>          | <a href="#">76889</a>     | aarF domain containing kinase  | <a href="#">Adck4</a>              | 0.912 | -1.901 | 0.0978611 | 0.304963 |
| 15323 | 10352777 | <a href="#">NM_009579</a>          | <a href="#">22782</a>     | solute carrier family 30 (zinc | <a href="#">Slc30a1</a>            | 0.912 | -1.205 | 0.266322  | 0.541183 |
| 15324 | 10403943 | <a href="#">NM_178200</a>          | <a href="#">319186</a>    | histone cluster 1, H2bm        | <a href="#">Hist1h2bm</a>          | 0.912 | -1.852 | 0.105186  | 0.319429 |
| 15325 | 10379953 | <a href="#">BC067002</a>           | <a href="#">74038</a>     | RIKEN cDNA 4632419I22 gene     | <a href="#">4632419I22Rik</a>      | 0.912 | -2.008 | 0.0833713 | 0.276517 |
| 15326 | 10500388 | <a href="#">BC026793</a>           | <a href="#">74414</a>     | polymerase (RNA) III (DNA dire | <a href="#">Polr3c</a>             | 0.912 | -1.074 | 0.317552  | 0.594733 |
| 15327 | 10389339 | <a href="#">NM_001029934</a>       | <a href="#">237898</a>    | ubiquitin specific peptidase 3 | <a href="#">Usp32</a>              | 0.912 | -1.635 | 0.144883  | 0.38638  |
| 15328 | 10414305 | <a href="#">BC085089</a>           | <a href="#">56291</a>     | phosphoserine/threonine/tyrosi | <a href="#">Styx</a>               | 0.912 | -0.507 | 0.627431  | 0.83052  |
| 15329 | 10540122 | <a href="#">NM_009320</a>          | <a href="#">21366</a>     | solute carrier family 6 (neuro | <a href="#">Slc6a6</a>             | 0.912 | -1.773 | 0.118254  | 0.343268 |
| 15330 | 10471191 | <a href="#">NM_144886</a>          | <a href="#">227715</a>    | exosome component 2            | <a href="#">Exosc2</a>             | 0.912 | -1.395 | 0.204455  | 0.467724 |
| 15331 | 10439634 | <a href="#">NM_025332</a>          | <a href="#">66067</a>     | GTP-binding protein 8 (putativ | <a href="#">Gtbp8</a>              | 0.912 | -1.479 | 0.181331  | 0.43738  |
| 15332 | 10565815 | <a href="#">ENSMUST00000078533</a> | <a href="#">245190</a>    | predicted gene, EG245190       | <a href="#">EG245190</a>           | 0.912 | -1.882 | 0.100609  | 0.31038  |
| 15333 | 10452815 | <a href="#">NM_011723</a>          | <a href="#">22436</a>     | xanthine dehydrogenase         | <a href="#">Xdh</a>                | 0.912 | -1.221 | 0.260579  | 0.535075 |
| 15334 | 10449041 | <a href="#">NM_133719</a>          | <a href="#">70083</a>     | meteorin, glial cell different | <a href="#">Metrn</a>              | 0.912 | -1.886 | 0.100001  | 0.309109 |
| 15335 | 10447239 | <a href="#">NM_026180</a>          | <a href="#">67470</a>     | ATP-binding cassette, sub-fami | <a href="#">Abcg8</a>              | 0.912 | -0.768 | 0.467046  | 0.719977 |
| 15336 | 10538100 | <a href="#">NM_001079901</a>       | <a href="#">58887</a>     | replication initiator 1        | <a href="#">Repin1</a>             | 0.912 | -1.526 | 0.169549  | 0.420889 |
| 15337 | 10356240 | <a href="#">NM_027921</a>          | <a href="#">71781</a>     | solute carrier family 16 (mono | <a href="#">Slc16a14</a>           | 0.912 | -1.267 | 0.244514  | 0.517622 |
| 15338 | 10422176 | <a href="#">ENSMUST00000105171</a> | <a href="#">320671</a>    | RIKEN cDNA D130079A08 gene     | <a href="#">D130079A08Rik</a>      | 0.912 | -1.605 | 0.151338  | 0.395197 |
| 15339 | 10391461 | <a href="#">NM_009764</a>          | <a href="#">12189</a>     | breast cancer 1                | <a href="#">Brca1</a>              | 0.912 | -1.613 | 0.14953   | 0.391974 |
| 15340 | 10529287 | <a href="#">NM_178390</a>          | <a href="#">74504</a>     | RIKEN cDNA 2410018C17 gene     | <a href="#">2410018C17Rik</a>      | 0.912 | -1.753 | 0.121805  | 0.348456 |
| 15341 | 10480744 | <a href="#">NM_029958</a>          | <a href="#">77701</a>     | lipocalin 12                   | <a href="#">Lcn12</a>              | 0.912 | -0.776 | 0.462597  | 0.717093 |

|       |          |                                    |                           |                                   |                                    |       |        |           |          |
|-------|----------|------------------------------------|---------------------------|-----------------------------------|------------------------------------|-------|--------|-----------|----------|
| 15342 | 10365637 | <a href="#">NM_025859</a>          | <a href="#">104303</a>    | ADP-ribosylation factor-like 1    | <a href="#">Arl1</a>               | 0.912 | -1.646 | 0.14253   | 0.382589 |
| 15343 | 10509562 | <a href="#">NM_026689</a>          | <a href="#">68350</a>     | mitochondrial ubiquitin ligase    | <a href="#">Mull1</a>              | 0.912 | -2.549 | 0.0372502 | 0.165989 |
| 15344 | 10389505 | <a href="#">ENSMUST00000069425</a> | <a href="#">327988</a>    | predicted gene,<br>ENSMUSG0000005 | <a href="#">ENSMUSG00000055697</a> | 0.912 | -1.228 | 0.257931  | 0.531958 |
| 15345 | 10507574 | <a href="#">NM_146852</a>          | <a href="#">258851</a>    | olfactory receptor 1339           | <a href="#">Olf1339</a>            | 0.912 | -0.91  | 0.392004  | 0.66023  |
| 15346 | 10505374 | <a href="#">NM_025685</a>          | <a href="#">373864</a>    | collagen, type XXVII, alpha 1     | <a href="#">Col27a1</a>            | 0.912 | -1.547 | 0.164536  | 0.414357 |
| 15347 | 10539393 | <a href="#">ENSMUST00000113900</a> | <a href="#">232156</a>    | solute carrier family 4, sodiu    | <a href="#">Slc4a5</a>             | 0.912 | -1.323 | 0.226369  | 0.496985 |
| 15348 | 10606546 |                                    |                           |                                   |                                    | 0.912 | -2.65  | 0.0320517 | 0.150167 |
| 15349 | 10550740 | <a href="#">NM_027839</a>          | <a href="#">71601</a>     | CEA-related cell adhesion mole    | <a href="#">Ceacam20</a>           | 0.912 | -1.207 | 0.265392  | 0.540498 |
| 15350 | 10393662 | <a href="#">NM_008730</a>          | <a href="#">18164</a>     | neuronal pentraxin 1              | <a href="#">Nptx1</a>              | 0.912 | -0.882 | 0.406386  | 0.671037 |
| 15351 | 10390283 | <a href="#">NM_030248</a>          | <a href="#">80280</a>     | CDK5 regulatory subunit associ    | <a href="#">Cdk5rap3</a>           | 0.912 | -1.731 | 0.125719  | 0.355019 |
| 15352 | 10472128 | <a href="#">NM_022989</a>          | <a href="#">65103</a>     | ADP-ribosylation factor-like 6    | <a href="#">Arl6ip6</a>            | 0.912 | -1.517 | 0.171898  | 0.424059 |
| 15353 | 10447188 | <a href="#">ENSMUST00000112344</a> | <a href="#">116871</a>    | metastasis associated 3           | <a href="#">Mta3</a>               | 0.912 | -0.628 | 0.549596  | 0.77991  |
| 15354 | 10529739 |                                    |                           |                                   |                                    | 0.912 | -1.064 | 0.321616  | 0.598456 |
| 15355 | 10562812 | <a href="#">NM_019866</a>          | <a href="#">272382</a>    | Spi-B transcription factor (Sp    | <a href="#">Spib</a>               | 0.912 | -0.863 | 0.415746  | 0.678857 |
| 15356 | 10370573 | <a href="#">NM_011583</a>          | <a href="#">21830</a>     | testicular haploid expressed g    | <a href="#">Theg</a>               | 0.912 | -0.952 | 0.371708  | 0.642056 |
| 15357 | 10471858 |                                    |                           |                                   |                                    | 0.912 | -0.816 | 0.440484  | 0.699376 |
| 15358 | 10578582 | <a href="#">NM_177240</a>          | <a href="#">320714</a>    | RIKEN cDNA D030016E14<br>gene     | <a href="#">D030016E14Rik</a>      | 0.912 | -2.008 | 0.0834347 | 0.276555 |
| 15359 | 10511950 |                                    |                           |                                   |                                    | 0.912 | -1.035 | 0.333907  | 0.609578 |
| 15360 | 10405804 | <a href="#">NM_001013608</a>       | <a href="#">76251</a>     | RIKEN cDNA 0610007P08 gene        | <a href="#">0610007P08Rik</a>      | 0.911 | -1.303 | 0.232491  | 0.503408 |
| 15361 | 10430324 | <a href="#">NM_027902</a>          | <a href="#">71753</a>     | transmembrane serine protease     | <a href="#">Tmprss6</a>            | 0.911 | -0.961 | 0.367454  | 0.638358 |
| 15362 | 10409579 | <a href="#">NM_019568</a>          | <a href="#">57266</a>     | chemokine (C-X-C motif) ligand    | <a href="#">Cxcl14</a>             | 0.911 | -1.218 | 0.26167   | 0.536119 |
| 15363 | 10582843 |                                    |                           |                                   |                                    | 0.911 | -1.81  | 0.111982  | 0.331246 |
| 15364 | 10550514 | <a href="#">NM_001029877</a>       | <a href="#">384569</a>    | neuro-oncological ventral anti    | <a href="#">Nova2</a>              | 0.911 | -0.982 | 0.357924  | 0.630288 |
| 15365 | 10353117 | <a href="#">NM_172841</a>          | <a href="#">240726</a>    | solute carrier organic anion t    | <a href="#">Slco5a1</a>            | 0.911 | -0.929 | 0.383039  | 0.652511 |
| 15366 | 10572722 | <a href="#">XR_033804</a>          | <a href="#">100047513</a> | similar to H3 histone, family     | <a href="#">LOC100047513</a>       | 0.911 | -1.475 | 0.182361  | 0.438828 |
| 15367 | 10500899 | <a href="#">NM_183224</a>          | <a href="#">329731</a>    | RIKEN cDNA 7530404M11<br>gene     | <a href="#">7530404M11Rik</a>      | 0.911 | -1.104 | 0.304911  | 0.581338 |
| 15368 | 10400564 | <a href="#">EF133693</a>           | <a href="#">623046</a>    | fibrous sheath CABYR binding p    | <a href="#">Fscb</a>               | 0.911 | -0.955 | 0.370597  | 0.641341 |
| 15369 | 10541877 | <a href="#">NM_001080557</a>       | <a href="#">22317</a>     | vesicle-associated membrane pr    | <a href="#">Vamp1</a>              | 0.911 | -1.265 | 0.245241  | 0.518331 |
| 15370 | 10578922 | <a href="#">NM_178633</a>          | <a href="#">77113</a>     | kelch-like 2, Mayven (Drosophi    | <a href="#">Klhl2</a>              | 0.911 | -1.987 | 0.0860559 | 0.2817   |
| 15371 | 10356999 | <a href="#">NM_011563</a>          | <a href="#">21672</a>     | peroxiredoxin 2                   | <a href="#">Prdx2</a>              | 0.911 | -1.73  | 0.125908  | 0.355243 |
| 15372 | 10499766 | <a href="#">NM_011988</a>          | <a href="#">26568</a>     | solute carrier family 27 (fatt    | <a href="#">Slc27a3</a>            | 0.911 | -1.938 | 0.0925946 | 0.294729 |
| 15373 | 10402585 | <a href="#">NM_011710</a>          | <a href="#">22375</a>     | tryptophanyl-tRNA synthetase      | <a href="#">Wars</a>               | 0.911 | -1.436 | 0.192968  | 0.452392 |
| 15374 | 10409616 | <a href="#">NM_009262</a>          | <a href="#">20745</a>     | sparc/osteonectin, cwcv and ka    | <a href="#">Spock1</a>             | 0.911 | -0.909 | 0.392737  | 0.660631 |
| 15375 | 10552044 | <a href="#">NM_172899</a>          | <a href="#">73712</a>     | dermokine                         | <a href="#">Dmkn</a>               | 0.911 | -1.219 | 0.261059  | 0.535632 |
| 15376 | 10386344 | <a href="#">BC094909</a>           | <a href="#">216792</a>    | RIKEN cDNA A230051G13<br>gene     | <a href="#">A230051G13Rik</a>      | 0.911 | -0.599 | 0.567328  | 0.792677 |
| 15377 | 10363557 | <a href="#">BC019469</a>           | <a href="#">74706</a>     | RIKEN cDNA 4930507D05<br>gene     | <a href="#">4930507D05Rik</a>      | 0.911 | -1.003 | 0.348264  | 0.622132 |
| 15378 | 10563275 | <a href="#">NM_011304</a>          | <a href="#">20174</a>     | RuvB-like protein 2               | <a href="#">Ruvb12</a>             | 0.911 | -2.484 | 0.0409873 | 0.176468 |
| 15379 | 10594244 |                                    |                           |                                   |                                    | 0.911 | -0.895 | 0.399455  | 0.665621 |
| 15380 | 10586168 |                                    |                           |                                   |                                    | 0.911 | -0.745 | 0.479816  | 0.729821 |
| 15381 | 10388684 | <a href="#">NM_144825</a>          | <a href="#">216965</a>    | TAO kinase 1                      | <a href="#">Taok1</a>              | 0.911 | -1.747 | 0.122914  | 0.350775 |
| 15382 | 10492957 | <a href="#">NM_007640</a>          | <a href="#">12480</a>     | CD1d2 antigen                     | <a href="#">Cd1d2</a>              | 0.911 | -1.268 | 0.244281  | 0.51746  |
| 15383 | 10524105 | <a href="#">NM_172717</a>          | <a href="#">231600</a>    | checkpoint with forkhead and r    | <a href="#">Chfr</a>               | 0.911 | -2.065 | 0.0766266 | 0.262465 |
| 15384 | 10566034 | <a href="#">NM_008034</a>          | <a href="#">14275</a>     | folate receptor 1 (adult)         | <a href="#">Folr1</a>              | 0.911 | -0.949 | 0.37343   | 0.643632 |
| 15385 | 10536711 | <a href="#">NM_053098</a>          | <a href="#">93677</a>     | leiomodrin 2 (cardiac)            | <a href="#">Lmod2</a>              | 0.911 | -0.704 | 0.503632  | 0.746064 |
| 15386 | 10512443 | <a href="#">NM_023231</a>          | <a href="#">66592</a>     | stomatin (Epb7.2)-like 2          | <a href="#">Stoml2</a>             | 0.911 | -1.194 | 0.270224  | 0.545035 |
| 15387 | 10382532 | <a href="#">NM_001080934</a>       | <a href="#">217316</a>    | solute carrier family 16 (mono    | <a href="#">Slc16a5</a>            | 0.911 | -1.06  | 0.323425  | 0.599973 |
| 15388 | 10598674 | <a href="#">XM_141626</a>          | <a href="#">245350</a>    | similar to Ubiquitin-conjugati    | <a href="#">LOC245350</a>          | 0.911 | -0.832 | 0.432077  | 0.692476 |
| 15389 | 10427369 | <a href="#">NM_008800</a>          | <a href="#">18574</a>     | phosphodiesterase 1B, Ca2+-cal    | <a href="#">Pde1b</a>              | 0.911 | -0.628 | 0.54954   | 0.779883 |
| 15390 | 10516926 | <a href="#">NM_026039</a>          | <a href="#">67219</a>     | mediator of RNA polymerase II     | <a href="#">Med18</a>              | 0.911 | -1.509 | 0.173826  | 0.426575 |
| 15391 | 10363460 | <a href="#">NM_001017433</a>       | <a href="#">65971</a>     | RIKEN cDNA 1700021K02<br>gene     | <a href="#">1700021K02Rik</a>      | 0.911 | -1.741 | 0.124017  | 0.352448 |
| 15392 | 10381697 | <a href="#">NM_138753</a>          | <a href="#">192231</a>    | hexamethylene bis-acetamide in    | <a href="#">Hexim1</a>             | 0.911 | -1.888 | 0.0996917 | 0.308576 |
|       |          |                                    |                           | predicted gene.                   |                                    |       |        |           |          |

|       |          |                                    |                           |                                                      |                                    |                       |        |           |          |
|-------|----------|------------------------------------|---------------------------|------------------------------------------------------|------------------------------------|-----------------------|--------|-----------|----------|
| 15393 | 10360804 | <a href="#">ENSMUST00000097444</a> | <a href="#">669853</a>    | ENSMUSG0000007                                       | <a href="#">ENSMUSG00000073482</a> | 0.911                 | -1.164 | 0.281462  | 0.55689  |
| 15394 | 10375704 | <a href="#">BC028428</a>           | <a href="#">68067</a>     | RIKEN cDNA 3010026O09 gene                           | <a href="#">3010026O09Rik</a>      | 0.911                 | -2.136 | 0.0689029 | 0.245893 |
| 15395 | 10566628 |                                    |                           |                                                      |                                    | 0.911                 | -0.824 | 0.436536  | 0.696302 |
| 15396 | 10442771 | <a href="#">NM_053259</a>          | <a href="#">114661</a>    | protease, serine, 28                                 | <a href="#">Prss28</a>             | 0.911                 | -0.99  | 0.354317  | 0.626867 |
| 15397 | 10389835 | <a href="#">NM_028547</a>          | <a href="#">73470</a>     | kinesin family member 2B                             | <a href="#">Kif2b</a>              | 0.911                 | -0.834 | 0.43108   | 0.691717 |
| 15398 | 10389269 | <a href="#">NM_019816</a>          | <a href="#">56321</a>     | apoptosis antagonizing transcr                       | <a href="#">Aatf</a>               | 0.911                 | -1.312 | 0.229749  | 0.500845 |
| 15399 | 10515519 | <a href="#">NM_033617</a>          | <a href="#">114143</a>    | ATPase, H+ transporting, lysos                       | <a href="#">Atp6v0b</a>            | 0.911                 | -1.223 | 0.25978   | 0.53415  |
| 15400 | 10440690 | <a href="#">NM_130873</a>          | <a href="#">170654</a>    | keratin associated protein 16-                       | <a href="#">Krtap16-4</a>          | 0.911                 | -1.203 | 0.26684   | 0.541465 |
| 15401 | 10426118 | <a href="#">NM_031260</a>          | <a href="#">83456</a>     | Moloney leukemia virus 10-like                       | <a href="#">Mov10l1</a>            | 0.911                 | -0.844 | 0.425676  | 0.687513 |
| 15402 | 10415045 | <a href="#">NM_026851</a>          | <a href="#">68836</a>     | mitochondrial ribosomal protei                       | <a href="#">Mrpl52</a>             | 0.911                 | -2.09  | 0.073842  | 0.256795 |
| 15403 | 10535720 | <a href="#">BC048528</a>           | <a href="#">69282</a>     | RIKEN cDNA 1700001J03 gene<br>gene model 628, (NCBI) | <a href="#">1700001J03Rik</a>      | 0.911                 | -0.686 | 0.514267  | 0.754529 |
| 15404 | 10429409 | <a href="#">AK132992</a>           | <a href="#">268816</a>    |                                                      |                                    | <a href="#">Gm628</a> | 0.911  | -0.803    | 0.447638 |
| 15405 | 10425263 | <a href="#">ENSMUST00000100456</a> | <a href="#">100038573</a> | predicted gene,<br>ENSMUSG0000007                    | <a href="#">ENSMUSG00000075556</a> | 0.911                 | -1.114 | 0.301039  | 0.577287 |
| 15406 | 10512747 | <a href="#">BC092543</a>           | <a href="#">74753</a>     | RIKEN cDNA 5830415F09 gene                           | <a href="#">5830415F09Rik</a>      | 0.911                 | -1.31  | 0.230516  | 0.501476 |
| 15407 | 10503244 |                                    |                           |                                                      |                                    | 0.911                 | -1.454 | 0.187994  | 0.446224 |
| 15408 | 10476590 | <a href="#">NM_001013802</a>       | <a href="#">72899</a>     | MACRO domain containing 2                            | <a href="#">Macro2</a>             | 0.911                 | -1.948 | 0.0912161 | 0.292267 |
| 15409 | 10502196 | <a href="#">NM_026724</a>          | <a href="#">68436</a>     | ribosomal protein L34                                | <a href="#">Rpl34</a>              | 0.911                 | -1.46  | 0.186348  | 0.44456  |
| 15410 | 10430770 | <a href="#">NM_020507</a>          | <a href="#">57259</a>     | transducer of ERBB2, 2                               | <a href="#">Tob2</a>               | 0.911                 | -1.256 | 0.248255  | 0.521623 |
| 15411 | 10462866 | <a href="#">NM_028760</a>          | <a href="#">74107</a>     | centrosomal protein 55                               | <a href="#">Cep55</a>              | 0.911                 | -1.123 | 0.297444  | 0.573687 |
| 15412 | 10438272 | <a href="#">NM_011172</a>          | <a href="#">19125</a>     | proline dehydrogenase                                | <a href="#">Prodh</a>              | 0.911                 | -1.598 | 0.152848  | 0.396925 |
| 15413 | 10477052 | <a href="#">BC016127</a>           | <a href="#">69698</a>     | RIKEN cDNA 2310046K01 gene                           | <a href="#">2310046K01Rik</a>      | 0.911                 | -0.74  | 0.482807  | 0.731475 |
| 15414 | 10434128 | <a href="#">NM_016983</a>          | <a href="#">22363</a>     | pre-B lymphocyte gene 2                              | <a href="#">Vpreb2</a>             | 0.911                 | -1.016 | 0.342505  | 0.616824 |
| 15415 | 10499909 | <a href="#">AK019072</a>           | <a href="#">78382</a>     | RIKEN cDNA 2210420J11 gene                           | <a href="#">2210420J11Rik</a>      | 0.911                 | -1.089 | 0.311405  | 0.587941 |
| 15416 | 10370721 | <a href="#">NM_183426</a>          | <a href="#">216161</a>    | strawberry notch homolog 2 (Dr                       | <a href="#">Sbno2</a>              | 0.911                 | -2.239 | 0.0591067 | 0.22389  |
| 15417 | 10420390 | <a href="#">NM_020506</a>          | <a href="#">57258</a>     | exportin 4                                           | <a href="#">Xpo4</a>               | 0.911                 | -1.697 | 0.132192  | 0.365389 |
| 15418 | 10490751 |                                    |                           |                                                      |                                    | 0.911                 | -0.549 | 0.599677  | 0.812038 |
| 15419 | 10594758 | <a href="#">NM_028087</a>          | <a href="#">72077</a>     | glucosaminyl (N-acetyl) transf                       | <a href="#">Gent3</a>              | 0.911                 | -1.251 | 0.250048  | 0.524217 |
| 15420 | 10533729 | <a href="#">NM_177876</a>          | <a href="#">330192</a>    | vacuolar protein sorting 37B (                       | <a href="#">Vps37b</a>             | 0.911                 | -0.808 | 0.445136  | 0.703541 |
| 15421 | 10570018 | <a href="#">NM_033622</a>          | <a href="#">24099</a>     | tumor necrosis factor (ligand)                       | <a href="#">Tnfsf13b</a>           | 0.911                 | -1.02  | 0.340543  | 0.615722 |
| 15422 | 10459471 | <a href="#">NM_013833</a>          | <a href="#">19434</a>     | retina and anterior neural fol                       | <a href="#">Rax</a>                | 0.91                  | -2.012 | 0.0828588 | 0.275685 |
| 15423 | 10427995 |                                    |                           |                                                      |                                    | 0.91                  | -0.693 | 0.509913  | 0.751318 |
| 15424 | 10545751 | <a href="#">NM_009357</a>          | <a href="#">21766</a>     | testis expressed gene 261                            | <a href="#">Tex261</a>             | 0.91                  | -1.454 | 0.188012  | 0.446224 |
| 15425 | 10511269 | <a href="#">NM_011341</a>          | <a href="#">20318</a>     | stromal cell derived factor 4                        | <a href="#">Sdf4</a>               | 0.91                  | -1.698 | 0.132136  | 0.365356 |
| 15426 | 10496822 | <a href="#">NM_010318</a>          | <a href="#">14707</a>     | guanine nucleotide binding pro                       | <a href="#">Gng5</a>               | 0.91                  | -2.066 | 0.0764657 | 0.262126 |
| 15427 | 10384229 |                                    |                           |                                                      |                                    | 0.91                  | -0.745 | 0.479697  | 0.729728 |
| 15428 | 10443199 | <a href="#">ENSMUST00000097361</a> | <a href="#">619324</a>    | RIKEN cDNA C130040N14 gene                           | <a href="#">C130040N14Rik</a>      | 0.91                  | -1.112 | 0.30181   | 0.577905 |
| 15429 | 10439087 | <a href="#">NM_146071</a>          | <a href="#">224116</a>    | mucin 20                                             | <a href="#">Muc20</a>              | 0.91                  | -0.624 | 0.551953  | 0.781881 |
| 15430 | 10418796 | <a href="#">NM_172254</a>          | <a href="#">105638</a>    | DPH3 homolog (KTI11, S. cerevi                       | <a href="#">Dph3</a>               | 0.91                  | -2.074 | 0.0756139 | 0.260007 |
| 15431 | 10368888 | <a href="#">NM_019740</a>          | <a href="#">56484</a>     | forkhead box O3a                                     | <a href="#">Foxo3a</a>             | 0.91                  | -1.485 | 0.1798    | 0.43509  |
| 15432 | 10508042 | <a href="#">BC108404</a>           | <a href="#">70088</a>     | RIKEN cDNA 2310005N01 gene                           | <a href="#">2310005N01Rik</a>      | 0.91                  | -1.331 | 0.223605  | 0.493567 |
| 15433 | 10498526 | <a href="#">ENSMUST00000099076</a> | <a href="#">71004</a>     | RIKEN cDNA 4931440P22 gene                           | <a href="#">4931440P22Rik</a>      | 0.91                  | -0.972 | 0.362556  | 0.634015 |
| 15434 | 10381930 |                                    |                           |                                                      |                                    | 0.91                  | -0.43  | 0.679918  | 0.857866 |
| 15435 | 10375382 | <a href="#">NM_001045520</a>       | <a href="#">216705</a>    | clathrin interactor 1                                | <a href="#">Clint1</a>             | 0.91                  | -2.038 | 0.0797417 | 0.269041 |
| 15436 | 10371603 | <a href="#">AK132809</a>           | <a href="#">626115</a>    | predicted gene, EG626115                             | <a href="#">EG626115</a>           | 0.91                  | -1.12  | 0.298632  | 0.574809 |
| 15437 | 10504648 | <a href="#">NM_026187</a>          | <a href="#">52231</a>     | ankyrin repeat and zinc finger                       | <a href="#">Ankzf1</a>             | 0.91                  | -1.955 | 0.32534   | 0.601678 |
| 15438 | 10347531 |                                    |                           |                                                      |                                    | 0.91                  | -1.787 | 0.175873  | 0.338428 |
| 15439 | 10582501 | <a href="#">NM_016925</a>          | <a href="#">14087</a>     | Fanconi anemia, complementatio                       | <a href="#">Fanca</a>              | 0.91                  | -1.445 | 0.190348  | 0.44932  |
| 15440 | 10351489 | <a href="#">XR_031469</a>          | <a href="#">640532</a>    | similar to Rp117 protein                             | <a href="#">LOC640532</a>          | 0.91                  | -0.805 | 0.446578  | 0.704239 |
| 15441 | 10401595 | <a href="#">NM_146244</a>          | <a href="#">238323</a>    | ribosomal protein S6 kinase-li                       | <a href="#">Rps6kl1</a>            | 0.91                  | -0.913 | 0.390786  | 0.659209 |
| 15442 | 10532926 | <a href="#">NM_007383</a>          | <a href="#">11409</a>     | acyl-Coenzyme A dehydrogenase,                       | <a href="#">Acads</a>              | 0.91                  | -1.327 | 0.225026  | 0.495052 |
| 15443 | 10462973 | <a href="#">NM_008234</a>          | <a href="#">15201</a>     | helicase, lymphoid specific                          | <a href="#">Hells</a>              | 0.91                  | -2.344 | 0.0504961 | 0.202329 |

|       |          |                                    |                        |                                    |                                    |       |        |           |          |
|-------|----------|------------------------------------|------------------------|------------------------------------|------------------------------------|-------|--------|-----------|----------|
| 15444 | 10604078 | <a href="#">NM_026573</a>          | <a href="#">68134</a>  | UPF3 regulator of nonsense tra     | <a href="#">Upf3b</a>              | 0.91  | -2.217 | 0.0610232 | 0.227923 |
| 15445 | 10493086 | <a href="#">NM_008231</a>          | <a href="#">15191</a>  | hepatoma-derived growth factor     | <a href="#">Hdgf</a>               | 0.91  | -1.458 | 0.187086  | 0.445467 |
| 15446 | 10415140 | <a href="#">AK052874</a>           | <a href="#">791403</a> | predicted gene,<br>ENSMUSG00000005 | <a href="#">ENSMUSG00000053118</a> | 0.91  | -1.178 | 0.276289  | 0.551172 |
| 15447 | 10370920 | <a href="#">NM_145361</a>          | <a href="#">208198</a> | BTB (POZ) domain containing 2      | <a href="#">Btbd2</a>              | 0.91  | -1.14  | 0.290803  | 0.567038 |
| 15448 | 10398422 |                                    |                        |                                    |                                    | 0.91  | -0.899 | 0.397572  | 0.664302 |
| 15449 | 10535849 | <a href="#">BC006902</a>           | <a href="#">71706</a>  | solute carrier family 46, memb     | <a href="#">Slc46a3</a>            | 0.91  | -1.395 | 0.204508  | 0.467724 |
| 15450 | 10517005 | <a href="#">NM_008154</a>          | <a href="#">14748</a>  | G-protein coupled receptor 3       | <a href="#">Gpr3</a>               | 0.91  | -0.572 | 0.584995  | 0.802565 |
| 15451 | 10571528 |                                    |                        |                                    |                                    | 0.91  | -0.965 | 0.365765  | 0.636847 |
| 15452 | 10371432 | <a href="#">BC003288</a>           | <a href="#">28088</a>  | DNA segment, Chr 10, Wayne<br>Sta  | <a href="#">D10Wsu52e</a>          | 0.91  | -2.091 | 0.0737224 | 0.256633 |
| 15453 | 10387525 | <a href="#">NM_011900</a>          | <a href="#">24070</a>  | mannose-P-dolichol utilization     | <a href="#">Mpdu1</a>              | 0.91  | -1.337 | 0.222008  | 0.491636 |
| 15454 | 10575685 | <a href="#">NM_024437</a>          | <a href="#">67528</a>  | nudix (nucleoside diphosphate      | <a href="#">Nudt7</a>              | 0.91  | -1.542 | 0.165763  | 0.416208 |
| 15455 | 10558641 | <a href="#">NM_146956</a>          | <a href="#">258958</a> | olfactory receptor 525             | <a href="#">Olfr525</a>            | 0.91  | -0.957 | 0.369337  | 0.639995 |
| 15456 | 10483856 | <a href="#">NM_011871</a>          | <a href="#">23992</a>  | protein kinase, interferon ind     | <a href="#">Prkra</a>              | 0.91  | -1.566 | 0.160096  | 0.407397 |
| 15457 | 10411432 | <a href="#">NM_178918</a>          | <a href="#">105372</a> | UTP15, U3 small nucleolar ribo     | <a href="#">Utp15</a>              | 0.91  | -1.545 | 0.16509   | 0.415207 |
| 15458 | 10418905 | <a href="#">NM_029389</a>          | <a href="#">75698</a>  | RIKEN cDNA 3110001K24<br>gene      | <a href="#">3110001K24Rik</a>      | 0.91  | -1.113 | 0.301552  | 0.577839 |
| 15459 | 10448471 | <a href="#">NM_025718</a>          | <a href="#">66705</a>  | deoxyribonuclease 1-like 2         | <a href="#">Dnase1l2</a>           | 0.91  | -0.71  | 0.500124  | 0.743152 |
| 15460 | 10520268 | <a href="#">ENSMUST00000075081</a> | <a href="#">70258</a>  | RIKEN cDNA 1500035N22<br>gene      | <a href="#">1500035N22Rik</a>      | 0.91  | -0.392 | 0.706616  | 0.87194  |
| 15461 | 10490970 |                                    |                        |                                    |                                    | 0.91  | -1.044 | 0.330068  | 0.606486 |
| 15462 | 10594297 | <a href="#">NM_025721</a>          | <a href="#">66712</a>  | sperm equatorial segment prote     | <a href="#">Spsp1</a>              | 0.91  | -1.328 | 0.224655  | 0.494757 |
| 15463 | 10594524 | <a href="#">XM_917864</a>          | <a href="#">384945</a> | ankyrin repeat and death domai     | <a href="#">Ankdd1a</a>            | 0.91  | -1.253 | 0.24937   | 0.523394 |
| 15464 | 10413542 | <a href="#">NM_009388</a>          | <a href="#">21881</a>  | transketolase                      | <a href="#">Tkt</a>                | 0.91  | -2.016 | 0.0824104 | 0.274537 |
| 15465 | 10491858 |                                    |                        |                                    |                                    | 0.91  | -1.166 | 0.280843  | 0.556319 |
| 15466 | 10573344 |                                    |                        |                                    |                                    | 0.91  | -0.917 | 0.388636  | 0.657212 |
| 15467 | 10373197 | <a href="#">NM_010565</a>          | <a href="#">16325</a>  | inhibin beta-C                     | <a href="#">Inhbc</a>              | 0.91  | -1.118 | 0.299596  | 0.575721 |
| 15468 | 10604879 | <a href="#">XR_031567</a>          | <a href="#">627734</a> | similar to checkpoint suppress     | <a href="#">LOC627734</a>          | 0.91  | -1.622 | 0.147545  | 0.389587 |
| 15469 | 10545720 | <a href="#">NM_024239</a>          | <a href="#">70527</a>  | Stam binding protein               | <a href="#">Stambp</a>             | 0.91  | -1.694 | 0.132781  | 0.366458 |
| 15470 | 10353773 | <a href="#">XM_920965</a>          | <a href="#">433287</a> | predicted gene,<br>OTTMUSG00000002 | <a href="#">OTTMUSG00000022109</a> | 0.91  | -1.173 | 0.278209  | 0.553196 |
| 15471 | 10485151 | <a href="#">NM_011162</a>          | <a href="#">19099</a>  | mitogen-activated protein kina     | <a href="#">Mapk8ip1</a>           | 0.91  | -1.727 | 0.126492  | 0.356138 |
| 15472 | 10469522 | <a href="#">BC049634</a>           | <a href="#">381350</a> | cDNA sequence BC061194             | <a href="#">BC061194</a>           | 0.91  | -0.953 | 0.371555  | 0.64202  |
| 15473 | 10475830 | <a href="#">NM_029963</a>          | <a href="#">77721</a>  | mitochondrial ribosomal protei     | <a href="#">Mrps5</a>              | 0.909 | -1.621 | 0.147721  | 0.389891 |
| 15474 | 10500114 | <a href="#">NM_019914</a>          | <a href="#">56772</a>  | myeloid/lymphoid or mixed-line     | <a href="#">Mllt11</a>             | 0.909 | -1.552 | 0.163458  | 0.412528 |
| 15475 | 10430968 | <a href="#">NM_001004150</a>       | <a href="#">239559</a> | alpha 1,4-galactosyltransferas     | <a href="#">A4galt</a>             | 0.909 | -0.719 | 0.494536  | 0.7396   |
| 15476 | 10416510 | <a href="#">NM_013745</a>          | <a href="#">27275</a>  | nuclear fragile X mental retar     | <a href="#">Nufip1</a>             | 0.909 | -2.064 | 0.0767698 | 0.262742 |
| 15477 | 10360631 | <a href="#">NM_023341</a>          | <a href="#">67426</a>  | chaperone, ABC1 activity of bc     | <a href="#">Cabc1</a>              | 0.909 | -1.802 | 0.113248  | 0.333396 |
| 15478 | 10363629 | <a href="#">NM_026701</a>          | <a href="#">68371</a>  | phenazine biosynthesis-like pr     | <a href="#">Pbld</a>               | 0.909 | -1.61  | 0.15008   | 0.393124 |
| 15479 | 10433101 | <a href="#">NM_030720</a>          | <a href="#">80910</a>  | G protein-coupled receptor 84      | <a href="#">Gpr84</a>              | 0.909 | -1.352 | 0.217238  | 0.484882 |
| 15480 | 10429674 | <a href="#">NM_031201</a>          | <a href="#">22122</a>  | tissue specific transplantatio     | <a href="#">Tsta3</a>              | 0.909 | -1.647 | 0.142266  | 0.382232 |
| 15481 | 10422067 | <a href="#">NM_015822</a>          | <a href="#">50789</a>  | F-box and leucine-rich repeat      | <a href="#">Fbx13</a>              | 0.909 | -1.816 | 0.111053  | 0.329804 |
| 15482 | 10534075 | <a href="#">NM_133900</a>          | <a href="#">100678</a> | phosphoserine phosphatase          | <a href="#">Psph</a>               | 0.909 | -1.774 | 0.118118  | 0.343095 |
| 15483 | 10529794 | <a href="#">XR_001803</a>          | <a href="#">636612</a> | predicted gene, EG636612           | <a href="#">EG636612</a>           | 0.909 | -1.276 | 0.241455  | 0.514338 |
| 15484 | 10559361 | <a href="#">NM_008007</a>          | <a href="#">14174</a>  | fibroblast growth factor 3         | <a href="#">Fgf3</a>               | 0.909 | -1.205 | 0.266368  | 0.541183 |
| 15485 | 10362596 | <a href="#">NM_001122893</a>       | <a href="#">14360</a>  | Fyn proto-oncogene                 | <a href="#">Fyn</a>                | 0.909 | -1.454 | 0.18816   | 0.446289 |
| 15486 | 10489562 | <a href="#">BC116354</a>           | <a href="#">75642</a>  | RIKEN cDNA 1700020C07<br>gene      | <a href="#">1700020C07Rik</a>      | 0.909 | -1.089 | 0.311304  | 0.587855 |
| 15487 | 10377826 | <a href="#">NM_001029929</a>       | <a href="#">574428</a> | zinc finger, MYND-type contain     | <a href="#">Zmynd15</a>            | 0.909 | -0.924 | 0.385552  | 0.654682 |
| 15488 | 10554017 | <a href="#">NM_152815</a>          | <a href="#">72635</a>  | lines homolog 2 (Drosophila)       | <a href="#">Lins2</a>              | 0.909 | -1.451 | 0.188735  | 0.446774 |
| 15489 | 10580704 | <a href="#">NM_011787</a>          | <a href="#">23802</a>  | autocrine motility factor rece     | <a href="#">Amfr</a>               | 0.909 | -2.147 | 0.0677482 | 0.243242 |
| 15490 | 10563303 | <a href="#">NM_007527</a>          | <a href="#">12028</a>  | Bcl2-associated X protein          | <a href="#">Bax</a>                | 0.909 | -2.028 | 0.0809791 | 0.271716 |
| 15491 | 10562349 | <a href="#">NM_026549</a>          | <a href="#">68079</a>  | programmed cell death 2-like       | <a href="#">Pcdcd2l</a>            | 0.909 | -1.761 | 0.120409  | 0.346759 |
| 15492 | 10438899 | <a href="#">NM_027904</a>          | <a href="#">71756</a>  | carboxypeptidase N, polypeptid     | <a href="#">Cpn2</a>               | 0.909 | -1.836 | 0.10779   | 0.323783 |
| 15493 | 10404129 | <a href="#">ENSMUST00000056790</a> | <a href="#">71199</a>  | RIKEN cDNA 4933427118 gene         | <a href="#">4933427118Rik</a>      | 0.909 | -0.916 | 0.389374  | 0.658054 |
| 15494 | 10357155 | <a href="#">NM_008381</a>          | <a href="#">16324</a>  | inhibin beta-B                     | <a href="#">Inhbb</a>              | 0.909 | -1.245 | 0.252189  | 0.526303 |
| 15495 | 10530641 | <a href="#">NM_177561</a>          | <a href="#">69727</a>  | ubiquitin specific peptidase 4     | <a href="#">Usp46</a>              | 0.909 | -1.816 | 0.110944  | 0.329706 |

|       |          |                                    |                           |                                |                                    |       |        |           |          |
|-------|----------|------------------------------------|---------------------------|--------------------------------|------------------------------------|-------|--------|-----------|----------|
| 15496 | 10481262 | <a href="#">NM_010190</a>          | <a href="#">14154</a>     | nicotin B                      | <a href="#">Fcnb</a>               | 0.909 | -0.748 | 0.41791   | 0.728494 |
| 15497 | 10579142 | <a href="#">XR_032879</a>          | <a href="#">665649</a>    | similar to Nucleoside diphosph | <a href="#">LOC665649</a>          | 0.909 | -1.814 | 0.111335  | 0.33023  |
| 15498 | 10413419 | <a href="#">NM_027871</a>          | <a href="#">71704</a>     | Rho guanine nucleotide exchang | <a href="#">Arhgef3</a>            | 0.909 | -2.242 | 0.0587691 | 0.22297  |
| 15499 | 10499703 |                                    |                           |                                |                                    | 0.909 | -0.902 | 0.396349  | 0.663741 |
| 15500 | 10457250 | <a href="#">NM_001039692</a>       | <a href="#">75415</a>     | Rho GTPase activating protein  | <a href="#">Arhgap12</a>           | 0.909 | -1.831 | 0.108508  | 0.325246 |
| 15501 | 10579976 | <a href="#">NM_178736</a>          | <a href="#">244548</a>    | ELMO domain containing 2       | <a href="#">Elmod2</a>             | 0.909 | -1.276 | 0.24153   | 0.514365 |
| 15502 | 10501591 | <a href="#">AK137339</a>           | <a href="#">68161</a>     | RIKEN cDNA A930005H10 gene     | <a href="#">A930005H10Rik</a>      | 0.909 | -2.102 | 0.0724742 | 0.253591 |
| 15503 | 10582580 |                                    |                           |                                |                                    | 0.909 | -1.602 | 0.151966  | 0.395759 |
| 15504 | 10444756 | <a href="#">NM_023179</a>          | <a href="#">66237</a>     | ATPase, H+ transporting, lysos | <a href="#">Atp6v1g2</a>           | 0.909 | -1.491 | 0.178295  | 0.433019 |
| 15505 | 10441244 | <a href="#">NM_020622</a>          | <a href="#">52793</a>     | open reading frame 9           | <a href="#">ORF9</a>               | 0.909 | -0.806 | 0.445803  | 0.703765 |
| 15506 | 10549530 |                                    |                           |                                |                                    | 0.909 | -1.157 | 0.28397   | 0.559215 |
| 15507 | 10368079 | <a href="#">ENSMUST00000095817</a> | <a href="#">100039660</a> | hypothetical protein LOC100039 | <a href="#">LOC100039660</a>       | 0.909 | -0.99  | 0.354295  | 0.626867 |
| 15508 | 10490045 |                                    |                           |                                |                                    | 0.909 | -1.452 | 0.188573  | 0.446595 |
| 15509 | 10345030 |                                    |                           |                                |                                    | 0.909 | -1.167 | 0.280305  | 0.555618 |
| 15510 | 10375129 | <a href="#">ENSMUST00000101371</a> | <a href="#">216644</a>    | RIKEN cDNA D130052B06 gene     | <a href="#">D130052B06Rik</a>      | 0.909 | -0.877 | 0.40885   | 0.673168 |
| 15511 | 10568948 | <a href="#">NM_183147</a>          | <a href="#">212518</a>    | shadow of prion protein        | <a href="#">Sprn</a>               | 0.909 | -1.312 | 0.229767  | 0.500845 |
| 15512 | 10544913 | <a href="#">NM_009953</a>          | <a href="#">12922</a>     | corticotropin releasing hormon | <a href="#">Crhr2</a>              | 0.909 | -1.107 | 0.303939  | 0.580269 |
| 15513 | 10538855 | <a href="#">XM_921076</a>          | <a href="#">545845</a>    | similar to Superoxide dismutas | <a href="#">LOC545845</a>          | 0.909 | -1.509 | 0.173738  | 0.426449 |
| 15514 | 10534974 | <a href="#">NM_008568</a>          | <a href="#">17220</a>     | minichromosome maintenance def | <a href="#">Mcm7</a>               | 0.909 | -2.173 | 0.0651774 | 0.238029 |
| 15515 | 10416406 | <a href="#">NM_172812</a>          | <a href="#">15558</a>     | 5-hydroxytryptamine (serotonin | <a href="#">Htr2a</a>              | 0.909 | -1.263 | 0.246047  | 0.51906  |
| 15516 | 10579066 | <a href="#">XR_032700</a>          | <a href="#">100041482</a> | similar to cadherin-11         | <a href="#">LOC100041482</a>       | 0.909 | -1.645 | 0.142646  | 0.382804 |
| 15517 | 10393887 | <a href="#">NM_144795</a>          | <a href="#">209027</a>    | pyrroline-5-carboxylate reduct | <a href="#">Pycr1</a>              | 0.909 | -1.467 | 0.18454   | 0.442142 |
| 15518 | 10534140 | <a href="#">ENSMUST00000078925</a> | <a href="#">625540</a>    | predicted gene, EG625540       | <a href="#">EG625540</a>           | 0.909 | -1.65  | 0.141737  | 0.381301 |
| 15519 | 10570647 | <a href="#">XR_030580</a>          | <a href="#">100039037</a> | similar to CG6004-PB           | <a href="#">LOC100039037</a>       | 0.909 | -0.802 | 0.44811   | 0.70576  |
| 15520 | 10368511 | <a href="#">NM_028604</a>          | <a href="#">73681</a>     | tRNA methyltransferase 11 homo | <a href="#">Trmt11</a>             | 0.909 | -0.796 | 0.451475  | 0.708527 |
| 15521 | 10544717 | <a href="#">ENSMUST00000067831</a> | <a href="#">791277</a>    | predicted gene, ENSMUSG0000005 | <a href="#">ENSMUSG00000054663</a> | 0.909 | -0.981 | 0.358286  | 0.630567 |
| 15522 | 10568258 | <a href="#">ENSMUST00000066769</a> | <a href="#">629159</a>    | RIKEN cDNA 1700008J07 gene     | <a href="#">1700008J07Rik</a>      | 0.909 | -1.23  | 0.257279  | 0.531552 |
| 15523 | 10559825 | <a href="#">BC117497</a>           | <a href="#">76373</a>     | RIKEN cDNA 2810409K11 gene     | <a href="#">2810409K11Rik</a>      | 0.909 | -1.769 | 0.118896  | 0.344375 |
| 15524 | 10558583 | <a href="#">BC065404</a>           | <a href="#">69752</a>     | zinc finger protein 511        | <a href="#">Zfp511</a>             | 0.909 | -1.685 | 0.134655  | 0.369832 |
| 15525 | 10604451 | <a href="#">NM_145951</a>          | <a href="#">209224</a>    | ecto-NOX disulfide-thiol excha | <a href="#">Enox2</a>              | 0.909 | -2.15  | 0.0675113 | 0.242726 |
| 15526 | 10555907 | <a href="#">NM_146758</a>          | <a href="#">258753</a>    | olfactory receptor 678         | <a href="#">Olfr678</a>            | 0.909 | -1.014 | 0.343531  | 0.617603 |
| 15527 | 10498332 | <a href="#">NM_009174</a>          | <a href="#">20439</a>     | seven in absentia 2            | <a href="#">Siah2</a>              | 0.909 | -2.403 | 0.0462369 | 0.190954 |
| 15528 | 10433278 | <a href="#">NM_023646</a>          | <a href="#">83945</a>     | DnaJ (Hsp40) homolog, subfamil | <a href="#">Dnaja3</a>             | 0.909 | -1.994 | 0.0852128 | 0.280273 |
| 15529 | 10515710 | <a href="#">ENSMUST00000075406</a> | <a href="#">230676</a>    | cDNA sequence BC059842         | <a href="#">BC059842</a>           | 0.908 | -1.101 | 0.306429  | 0.582919 |
| 15530 | 10468651 | <a href="#">XM_894554</a>          | <a href="#">629643</a>    | predicted gene, EG629643       | <a href="#">EG629643</a>           | 0.908 | -1.365 | 0.213354  | 0.479304 |
| 15531 | 10493335 | <a href="#">BC059914</a>           | <a href="#">76022</a>     | RIKEN cDNA 5830417I10 gene     | <a href="#">5830417I10Rik</a>      | 0.908 | -0.261 | 0.801069  | 0.919467 |
| 15532 | 10543682 |                                    |                           |                                |                                    | 0.908 | -1.11  | 0.302558  | 0.578687 |
| 15533 | 10499138 | <a href="#">NM_027539</a>          | <a href="#">70762</a>     | doublecortin-like kinase 2     | <a href="#">Dclk2</a>              | 0.908 | -1.622 | 0.14752   | 0.389587 |
| 15534 | 10547767 |                                    |                           |                                |                                    | 0.908 | -0.25  | 0.809713  | 0.923191 |
| 15535 | 10479685 | <a href="#">NM_011012</a>          | <a href="#">18389</a>     | opioid receptor-like 1         | <a href="#">Oprl1</a>              | 0.908 | -1.767 | 0.119275  | 0.34536  |
| 15536 | 10567941 | <a href="#">NM_146200</a>          | <a href="#">56347</a>     | eukaryotic translation initiat | <a href="#">Eif3c</a>              | 0.908 | -2.592 | 0.0349438 | 0.158824 |
| 15537 | 10368144 | <a href="#">NM_009397</a>          | <a href="#">21929</a>     | tumor necrosis factor, alpha-i | <a href="#">Tnfaip3</a>            | 0.908 | -2.232 | 0.0597165 | 0.225162 |
| 15538 | 10412760 | <a href="#">NM_008369</a>          | <a href="#">16188</a>     | interleukin 3 receptor, alpha  | <a href="#">Il3ra</a>              | 0.908 | -1.071 | 0.318781  | 0.596066 |
| 15539 | 10576439 | <a href="#">NM_029746</a>          | <a href="#">76332</a>     | component of oligomeric golgi  | <a href="#">Cog2</a>               | 0.908 | -2.247 | 0.0583638 | 0.22191  |
| 15540 | 10369735 | <a href="#">ENSMUST00000054837</a> | <a href="#">641387</a>    | RIKEN cDNA 1700120B22 gene     | <a href="#">1700120B22Rik</a>      | 0.908 | -1.234 | 0.255973  | 0.530431 |
| 15541 | 10524388 | <a href="#">NM_001033428</a>       | <a href="#">333048</a>    | gene model 854, (NCBI)         | <a href="#">Gm854</a>              | 0.908 | -0.659 | 0.530329  | 0.765382 |
| 15542 | 10444236 | <a href="#">NM_010388</a>          | <a href="#">15000</a>     | histocompatibility 2, class II | <a href="#">H2-DMb2</a>            | 0.908 | -1.277 | 0.241095  | 0.513985 |
| 15543 | 10534216 | <a href="#">NM_001080746</a>       | <a href="#">14886</a>     | general transcription factor I | <a href="#">Gtf2i</a>              | 0.908 | -2.399 | 0.0465435 | 0.191723 |
| 15544 | 10387936 | <a href="#">NM_172561</a>          | <a href="#">216873</a>    | sperm associated antigen 7     | <a href="#">Spag7</a>              | 0.908 | -1.793 | 0.114813  | 0.336981 |
| 15545 | 10460517 | <a href="#">NM_134155</a>          | <a href="#">107392</a>    | breast cancer metastasis-suppr | <a href="#">Brms1</a>              | 0.908 | -1.931 | 0.0935341 | 0.296593 |
| 15546 | 10478281 | <a href="#">ENSMUST00000088383</a> | <a href="#">100126880</a> | predicted gene,                | <a href="#">ENSMUSG00000016070</a> | 0.908 | -0.984 | 0.356014  | 0.629107 |

|       |          |                                     |                           |                                |                                    |       |        |           |          |
|-------|----------|-------------------------------------|---------------------------|--------------------------------|------------------------------------|-------|--------|-----------|----------|
| 15546 | 10478281 | <a href="#">ENSMUST000000000000</a> | <a href="#">100120889</a> | OTTMUSG0000001                 | <a href="#">OTTMUSG00000010079</a> | 0.908 | -0.784 | 0.350714  | 0.821777 |
| 15547 | 10471525 | <a href="#">NM_178595</a>           | <a href="#">329384</a>    | peptidyl-tRNA hydrolase 1 homo | <a href="#">Pth1</a>               | 0.908 | -1.005 | 0.347593  | 0.621575 |
| 15548 | 10454543 |                                     |                           |                                |                                    | 0.908 | -1.188 | 0.272472  | 0.547065 |
| 15549 | 10347980 | <a href="#">NM_022417</a>           | <a href="#">64294</a>     | integral membrane protein 2C   | <a href="#">Itm2c</a>              | 0.908 | -1.685 | 0.134622  | 0.369832 |
| 15550 | 10594517 | <a href="#">NM_028974</a>           | <a href="#">74492</a>     | RIKEN cDNA 5430433E21 gene     | <a href="#">5430433E21Rik</a>      | 0.908 | -0.998 | 0.350723  | 0.624059 |
| 15551 | 10545842 | <a href="#">NM_001001160</a>        | <a href="#">330369</a>    | F-box protein 41               | <a href="#">Fbxo41</a>             | 0.908 | -0.706 | 0.502615  | 0.745467 |
| 15552 | 10507990 | <a href="#">ENSMUST00000106185</a>  | <a href="#">230735</a>    | Eph receptor A10               | <a href="#">Epha10</a>             | 0.908 | -1.237 | 0.254752  | 0.528967 |
| 15553 | 10441813 | <a href="#">AF357405</a>            | <a href="#">21454</a>     | t-complex protein 1            | <a href="#">Tep1</a>               | 0.908 | -1.496 | 0.177175  | 0.431538 |
| 15554 | 10568622 |                                     |                           |                                |                                    | 0.908 | -1.492 | 0.178     | 0.432602 |
| 15555 | 10590169 | <a href="#">NM_007397</a>           | <a href="#">11481</a>     | activin receptor IIB           | <a href="#">Aevr2b</a>             | 0.908 | -1.479 | 0.181561  | 0.437783 |
| 15556 | 10533594 | <a href="#">NM_029112</a>           | <a href="#">74890</a>     | MORN repeat containing 3       | <a href="#">Morn3</a>              | 0.908 | -1.695 | 0.132598  | 0.36625  |
| 15557 | 10504615 | <a href="#">ENSMUST00000043958</a>  | <a href="#">381522</a>    | RIKEN cDNA E230008N13 gene     | <a href="#">E230008N13Rik</a>      | 0.908 | -0.878 | 0.408231  | 0.672667 |
| 15558 | 10548697 |                                     |                           |                                |                                    | 0.908 | -1.308 | 0.230883  | 0.501612 |
| 15559 | 10398121 | <a href="#">NM_007539</a>           | <a href="#">12061</a>     | bradykinin receptor, beta 1    | <a href="#">Bdkrb1</a>             | 0.908 | -0.554 | 0.596325  | 0.809852 |
| 15560 | 10467653 | <a href="#">NM_199447</a>           | <a href="#">107094</a>    | ribosomal RNA processing 12 ho | <a href="#">Rrp12</a>              | 0.908 | -1.967 | 0.0886669 | 0.286953 |
| 15561 | 10505612 | <a href="#">XR_033396</a>           | <a href="#">667922</a>    | similar to Ribosomal protein S | <a href="#">LOC667922</a>          | 0.908 | -2.004 | 0.0839012 | 0.277666 |
| 15562 | 10596409 | <a href="#">AM748257</a>            | <a href="#">665033</a>    | predicted gene, EG665033       | <a href="#">EG665033</a>           | 0.908 | -1.304 | 0.232463  | 0.503399 |
| 15563 | 10430113 | <a href="#">BC060637</a>            | <a href="#">223666</a>    | DNA segment, Chr 15, Wayne Sta | <a href="#">D15Wsu169e</a>         | 0.908 | -1.836 | 0.107813  | 0.323807 |
| 15564 | 10496182 | <a href="#">NM_001004367</a>        | <a href="#">319478</a>    | CXXC finger 4                  | <a href="#">Cxxc4</a>              | 0.908 | -1.399 | 0.203213  | 0.466024 |
| 15565 | 10458762 | <a href="#">XR_033442</a>           | <a href="#">100047177</a> | similar to SMT3B protein       | <a href="#">LOC100047177</a>       | 0.908 | -0.244 | 0.813805  | 0.925112 |
| 15566 | 10455826 | <a href="#">NM_001001979</a>        | <a href="#">70417</a>     | multiple EGF-like-domains 10   | <a href="#">Megf10</a>             | 0.908 | -1.614 | 0.149328  | 0.391688 |
| 15567 | 10422518 | <a href="#">NM_028651</a>           | <a href="#">70551</a>     | transmembrane and tetratrico   | <a href="#">Tmtc4</a>              | 0.908 | -2.195 | 0.0631027 | 0.232827 |
| 15568 | 10383999 | <a href="#">NM_026080</a>           | <a href="#">64660</a>     | mitochondrial ribosomal protei | <a href="#">Mrps24</a>             | 0.908 | -1.386 | 0.207009  | 0.471406 |
| 15569 | 10364280 | <a href="#">NM_145925</a>           | <a href="#">108705</a>    | pituitary tumor-transforming 1 | <a href="#">Pttg1ip</a>            | 0.908 | -2.423 | 0.0449116 | 0.187485 |
| 15570 | 10373756 | <a href="#">NM_172791</a>           | <a href="#">237625</a>    | phospholipase A2, group III    | <a href="#">Pla2g3</a>             | 0.908 | -1.242 | 0.253067  | 0.527333 |
| 15571 | 10507874 | <a href="#">NM_183163</a>           | <a href="#">230726</a>    | rhomoid, veinlet-like 2 (Dros  | <a href="#">Rhbd12</a>             | 0.908 | -1.12  | 0.29871   | 0.574899 |
| 15572 | 10599849 |                                     |                           |                                |                                    | 0.908 | -0.418 | 0.688287  | 0.86292  |
| 15573 | 10425461 | <a href="#">NM_009634</a>           | <a href="#">11564</a>     | adenylosuccinate lyase         | <a href="#">Adsl</a>               | 0.908 | -2.349 | 0.0501213 | 0.201363 |
| 15574 | 10536481 | <a href="#">XR_031404</a>           | <a href="#">100045223</a> | similar to high-mobility group | <a href="#">LOC100045223</a>       | 0.908 | -0.949 | 0.373396  | 0.643632 |
| 15575 | 10450920 | <a href="#">AY036118</a>            | <a href="#">170798</a>    | cDNA sequence AY036118         | <a href="#">AY036118</a>           | 0.908 | -2.09  | 0.0738101 | 0.256746 |
| 15576 | 10547926 | <a href="#">NM_012003</a>           | <a href="#">26894</a>     | COP9 (constitutive photomorpho | <a href="#">Cops3a</a>             | 0.908 | -1.803 | 0.113211  | 0.333342 |
| 15577 | 10425477 | <a href="#">NM_134091</a>           | <a href="#">105835</a>    | small G protein signaling modu | <a href="#">Sgsm3</a>              | 0.908 | -0.949 | 0.373473  | 0.643632 |
| 15578 | 10587051 | <a href="#">NM_001033500</a>        | <a href="#">546144</a>    | WD repeat domain 72            | <a href="#">Wdr72</a>              | 0.908 | -1.487 | 0.179321  | 0.434671 |
| 15579 | 10461220 | <a href="#">NM_001081196</a>        | <a href="#">68693</a>     | heterogeneous nuclear ribonucl | <a href="#">Hnrpul2</a>            | 0.908 | -1.694 | 0.132908  | 0.366563 |
| 15580 | 10544017 | <a href="#">NM_177200</a>           | <a href="#">320590</a>    | SV2 related protein homolog (r | <a href="#">Svopl</a>              | 0.908 | -0.377 | 0.716699  | 0.875846 |
| 15581 | 10537934 | <a href="#">NM_145576</a>           | <a href="#">232784</a>    | Zinc finger protein 212        | <a href="#">Zfp212</a>             | 0.907 | -1.59  | 0.154669  | 0.399843 |
| 15582 | 10352709 | <a href="#">NM_198654</a>           | <a href="#">381318</a>    | NSL1, MIND kinetochore complex | <a href="#">Nsl1</a>               | 0.907 | -1.719 | 0.128032  | 0.358796 |
| 15583 | 10495359 | <a href="#">NM_145543</a>           | <a href="#">229725</a>    | chloride channel CLIC-like 1   | <a href="#">Clcc1</a>              | 0.907 | -1.27  | 0.243521  | 0.516501 |
| 15584 | 10425333 | <a href="#">ENSMUST00000100423</a>  | <a href="#">80287</a>     | apolipoprotein B editing compl | <a href="#">Apobec3</a>            | 0.907 | -0.591 | 0.572282  | 0.796254 |
| 15585 | 10492442 |                                     |                           |                                |                                    | 0.907 | -1.33  | 0.22413   | 0.494224 |
| 15586 | 10578281 | <a href="#">NM_030610</a>           | <a href="#">80857</a>     | fibroblast growth factor 20    | <a href="#">Fgf20</a>              | 0.907 | -1.291 | 0.236634  | 0.508732 |
| 15587 | 10362829 | <a href="#">NM_172416</a>           | <a href="#">14628</a>     | osteopetrosis associated trans | <a href="#">Ostm1</a>              | 0.907 | -1.707 | 0.130259  | 0.362012 |
| 15588 | 10441565 | <a href="#">NM_011299</a>           | <a href="#">20112</a>     | ribosomal protein S6 kinase, p | <a href="#">Rps6ka2</a>            | 0.907 | -1.882 | 0.100557  | 0.310299 |
| 15589 | 10439498 |                                     |                           |                                |                                    | 0.907 | -0.919 | 0.38803   | 0.656728 |
| 15590 | 10500845 | <a href="#">AK048683</a>            | <a href="#">100125931</a> | RIKEN cDNA A130049A11 gene     | <a href="#">A130049A11Rik</a>      | 0.907 | -0.574 | 0.583364  | 0.80142  |
| 15591 | 10382421 | <a href="#">NM_181749</a>           | <a href="#">217302</a>    | G protein-coupled receptor 142 | <a href="#">Gpr142</a>             | 0.907 | -0.425 | 0.68327   | 0.859827 |
| 15592 | 10596259 |                                     |                           |                                |                                    | 0.907 | -1.875 | 0.101644  | 0.312332 |
| 15593 | 10523853 | <a href="#">NM_027599</a>           | <a href="#">70902</a>     | acyltransferase like 1B        | <a href="#">Ayt11b</a>             | 0.907 | -1.319 | 0.227459  | 0.498227 |
| 15594 | 10485280 | <a href="#">XM_885087</a>           | <a href="#">620695</a>    | hypothetical protein LOC620695 | <a href="#">LOC620695</a>          | 0.907 | -1.517 | 0.171838  | 0.42401  |
| 15595 | 10367106 | <a href="#">NM_016774</a>           | <a href="#">11947</a>     | ATP synthase, H+ transporting  | <a href="#">Atp5b</a>              | 0.907 | -2.489 | 0.0406885 | 0.175862 |
| 15596 | 10466920 |                                     |                           |                                |                                    | 0.907 | -1.049 | 0.327926  | 0.604189 |
| 15597 | 10541729 | <a href="#">NM_013538</a>           | <a href="#">14793</a>     | cell division cycle associated | <a href="#">Cdca3</a>              | 0.907 | -1.517 | 0.171792  | 0.423994 |
| 15598 | 10537375 | <a href="#">NM_177185</a>           | <a href="#">320538</a>    | RIKEN cDNA D130059P03 gene     | <a href="#">D130059P03Rik</a>      | 0.907 | -2.708 | 0.0294288 | 0.141691 |

|       |          |                                    |                           |                                        |                               |       |        |           |          |
|-------|----------|------------------------------------|---------------------------|----------------------------------------|-------------------------------|-------|--------|-----------|----------|
| 15599 | 10538936 |                                    |                           |                                        |                               | 0.907 | -0.884 | 0.405024  | 0.669624 |
| 15600 | 10531752 | <a href="#">NM_001081107</a>       | <a href="#">191578</a>    | helicase, mus308-like (Drosoph         | <a href="#">Hel308</a>        | 0.907 | -2.279 | 0.0556416 | 0.215355 |
| 15601 | 10452213 | <a href="#">NM_133801</a>          | <a href="#">98053</a>     | general transcription factor I         | <a href="#">Gtf2f1</a>        | 0.907 | -1.578 | 0.157429  | 0.404021 |
| 15602 | 10368058 | <a href="#">ENSMUST00000095817</a> | <a href="#">100039660</a> | hypothetical protein LOC100039         | <a href="#">LOC100039660</a>  | 0.907 | -1.412 | 0.199476  | 0.461105 |
| 15603 | 10504064 | <a href="#">NM_025539</a>          | <a href="#">66401</a>     | nudix (nucleoside diphosphate          | <a href="#">Nudt2</a>         | 0.907 | -2.7   | 0.0297808 | 0.142883 |
| 15604 | 10399629 | <a href="#">NM_011739</a>          | <a href="#">22630</a>     | tyrosine 3-monooxygenase/trypt         | <a href="#">Ywhaq</a>         | 0.907 | -2.806 | 0.025489  | 0.12918  |
| 15605 | 10441053 |                                    |                           |                                        |                               | 0.907 | -1.761 | 0.120287  | 0.3466   |
| 15606 | 10599956 | <a href="#">XM_001474469</a>       | <a href="#">100040304</a> | similar to syndecan-1                  | <a href="#">LOC100040304</a>  | 0.907 | -0.894 | 0.400007  | 0.665979 |
| 15607 | 10499285 | <a href="#">NM_007529</a>          | <a href="#">12032</a>     | brevican                               | <a href="#">Bcan</a>          | 0.907 | -1.45  | 0.189219  | 0.447572 |
| 15608 | 10578153 | <a href="#">XR_035697</a>          | <a href="#">619780</a>    | similar to Fatty acid binding          | <a href="#">LOC619780</a>     | 0.907 | -0.58  | 0.579436  | 0.798942 |
| 15609 | 10552412 | <a href="#">NM_028849</a>          | <a href="#">74276</a>     | claudin domain containing 2            | <a href="#">Clnd2</a>         | 0.907 | -1.019 | 0.341175  | 0.616038 |
| 15610 | 10362402 |                                    |                           |                                        |                               | 0.907 | -0.906 | 0.39412   | 0.661897 |
| 15611 | 10599747 | <a href="#">NM_001110790</a>       | <a href="#">236798</a>    | G protein-coupled receptor 112         | <a href="#">Gpr112</a>        | 0.907 | -1.745 | 0.123297  | 0.351408 |
| 15612 | 10566516 | <a href="#">BC022923</a>           | <a href="#">101867</a>    | RIKEN cDNA 1500003O22                  | <a href="#">1500003O22Rik</a> | 0.907 | -2.253 | 0.0578483 | 0.220625 |
| 15613 | 10441107 | <a href="#">NM_019537</a>          | <a href="#">56088</a>     | gene<br>proteasome (prosome, macropain | <a href="#">Psmg1</a>         | 0.907 | -1.766 | 0.119546  | 0.345831 |
| 15614 | 10466521 | <a href="#">NM_173442</a>          | <a href="#">14537</a>     | glucosaminyl (N-acetyl) transf         | <a href="#">Gent1</a>         | 0.907 | -1.977 | 0.0873827 | 0.284469 |
| 15615 | 10346337 | <a href="#">ENSMUST00000042734</a> | <a href="#">73467</a>     | RIKEN cDNA 1700066M21                  | <a href="#">1700066M21Rik</a> | 0.907 | -1.11  | 0.302831  | 0.578887 |
| 15616 | 10445941 | <a href="#">XR_034600</a>          | <a href="#">100043485</a> | hypothetical protein LOC100043         | <a href="#">LOC100043485</a>  | 0.907 | -1.532 | 0.168018  | 0.41938  |
| 15617 | 10599812 | <a href="#">NM_009575</a>          | <a href="#">22773</a>     | zinc finger protein of the cer         | <a href="#">Zic3</a>          | 0.907 | -1.398 | 0.203745  | 0.466884 |
| 15618 | 10520544 | <a href="#">NM_133350</a>          | <a href="#">100732</a>    | microtubule-associated protein         | <a href="#">Mapre3</a>        | 0.907 | -1.877 | 0.101353  | 0.311893 |
| 15619 | 10466925 | <a href="#">NM_021299</a>          | <a href="#">56248</a>     | adenylate kinase 3                     | <a href="#">Ak3</a>           | 0.907 | -1.691 | 0.133347  | 0.367457 |
| 15620 | 10576460 | <a href="#">NM_023709</a>          | <a href="#">73647</a>     | calpain 9 (nCL-4)                      | <a href="#">Capn9</a>         | 0.907 | -0.959 | 0.368397  | 0.639207 |
| 15621 | 10586227 | <a href="#">ENSMUST00000098640</a> | <a href="#">319526</a>    | RIKEN cDNA F730015K02                  | <a href="#">F730015K02Rik</a> | 0.907 | -0.998 | 0.350485  | 0.624003 |
| 15622 | 10533526 |                                    |                           |                                        |                               | 0.907 | -1.711 | 0.129634  | 0.361037 |
| 15623 | 10375167 | <a href="#">BC072605</a>           | <a href="#">574403</a>    | predicted gene, EG574403               | <a href="#">EG574403</a>      | 0.907 | -0.999 | 0.350295  | 0.623822 |
| 15624 | 10539002 | <a href="#">NM_009543</a>          | <a href="#">22644</a>     | ring finger protein 103                | <a href="#">Rnf103</a>        | 0.907 | -1.651 | 0.141548  | 0.381018 |
| 15625 | 10411332 | <a href="#">NM_008255</a>          | <a href="#">15357</a>     | 3-hydroxy-3-methylglutaryl-Co          | <a href="#">Hmgcr</a>         | 0.907 | -2.874 | 0.023105  | 0.120804 |
| 15626 | 10574147 |                                    |                           |                                        |                               | 0.907 | -1.038 | 0.332729  | 0.608795 |
| 15627 | 10492452 |                                    |                           |                                        |                               | 0.907 | -0.122 | 0.906242  | 0.963405 |
| 15628 | 10449242 | <a href="#">NM_026506</a>          | <a href="#">68011</a>     | small nuclear ribonucleoprotei         | <a href="#">Snrpg</a>         | 0.907 | -1.372 | 0.211288  | 0.476813 |
| 15629 | 10384152 | <a href="#">NM_011221</a>          | <a href="#">19291</a>     | purine rich element binding pr         | <a href="#">Purb</a>          | 0.907 | -2.729 | 0.0285323 | 0.138591 |
| 15630 | 10502438 | <a href="#">ENSMUST00000116118</a> | <a href="#">229879</a>    | predicted gene, EG229879               | <a href="#">EG229879</a>      | 0.907 | -1.003 | 0.348234  | 0.622132 |
| 15631 | 10549813 | <a href="#">NM_028316</a>          | <a href="#">72667</a>     | zinc finger protein 444                | <a href="#">Zfp444</a>        | 0.907 | -1.451 | 0.188806  | 0.446844 |
| 15632 | 10395074 | <a href="#">NM_001093775</a>       | <a href="#">17933</a>     | myelin transcription factor 1-         | <a href="#">Myt11</a>         | 0.907 | -1.439 | 0.192092  | 0.451438 |
| 15633 | 10391221 | <a href="#">NM_001038010</a>       | <a href="#">14534</a>     | GCN5 general control of amino          | <a href="#">Gen512</a>        | 0.906 | -2.599 | 0.03456   | 0.157724 |
| 15634 | 10429686 | <a href="#">BC047213</a>           | <a href="#">223648</a>    | RIKEN cDNA 2410075B13                  | <a href="#">2410075B13Rik</a> | 0.906 | -0.918 | 0.388437  | 0.657074 |
| 15635 | 10477022 | <a href="#">NM_145535</a>          | <a href="#">228765</a>    | syndecan binding protein (synt         | <a href="#">Sdcbp2</a>        | 0.906 | -1.43  | 0.194535  | 0.454622 |
| 15636 | 10437677 | <a href="#">NM_013638</a>          | <a href="#">19120</a>     | protamine 3                            | <a href="#">Prm3</a>          | 0.906 | -1.719 | 0.127996  | 0.358742 |
| 15637 | 10385375 | <a href="#">NM_001080969</a>       | <a href="#">66628</a>     | tRNA-histidine guanylyltransfe         | <a href="#">Thg11</a>         | 0.906 | -2.127 | 0.0697908 | 0.247552 |
| 15638 | 10396421 | <a href="#">NM_010431</a>          | <a href="#">15251</a>     | hypoxia inducible factor 1, al         | <a href="#">Hif1a</a>         | 0.906 | -1.753 | 0.121747  | 0.348385 |
| 15639 | 10591416 |                                    |                           |                                        |                               | 0.906 | -1.223 | 0.259867  | 0.53415  |
| 15640 | 10405372 | <a href="#">NM_012017</a>          | <a href="#">26919</a>     | zinc finger protein 346                | <a href="#">Zfp346</a>        | 0.906 | -1.45  | 0.18919   | 0.447572 |
| 15641 | 10378443 | <a href="#">NM_001011851</a>       | <a href="#">258153</a>    | olfactory receptor 412                 | <a href="#">Olf412</a>        | 0.906 | -0.527 | 0.614263  | 0.821474 |
| 15642 | 10585398 | <a href="#">NM_177350</a>          | <a href="#">235379</a>    | gliomedin                              | <a href="#">Gldn</a>          | 0.906 | -0.649 | 0.536255  | 0.769395 |
| 15643 | 10439936 | <a href="#">NM_030612</a>          | <a href="#">80859</a>     | nuclear factor of kappa light          | <a href="#">Nfkbiz</a>        | 0.906 | -0.985 | 0.356403  | 0.628882 |
| 15644 | 10586484 | <a href="#">NM_026635</a>          | <a href="#">68250</a>     | RIKEN cDNA 5730536A07                  | <a href="#">5730536A07Rik</a> | 0.906 | -2.317 | 0.0525462 | 0.207399 |
| 15645 | 10575209 |                                    |                           |                                        |                               | 0.906 | -1.154 | 0.285119  | 0.560432 |
| 15646 | 10452876 |                                    |                           |                                        |                               | 0.906 | -0.96  | 0.367979  | 0.638955 |
| 15647 | 10517014 |                                    |                           |                                        |                               | 0.906 | -0.73  | 0.388524  | 0.736128 |
| 15648 | 10526217 | <a href="#">NM_020022</a>          | <a href="#">19718</a>     | replication factor C (activato         | <a href="#">Rfc2</a>          | 0.906 | -2.097 | 0.0730535 | 0.254849 |
| 15649 | 10575955 | <a href="#">BC025816</a>           | <a href="#">234796</a>    | cDNA sequence BC025816                 | <a href="#">BC025816</a>      | 0.906 | -1.758 | 0.120881  | 0.347273 |
| 15650 | 10603147 | <a href="#">NM_146238</a>          | <a href="#">237221</a>    | gem (nuclear organelle) associ         | <a href="#">Gemin8</a>        | 0.906 | -0.862 | 0.416629  | 0.679566 |
| 15651 | 10504670 |                                    |                           |                                        |                               | 0.906 | -0.941 | 0.37696   | 0.647069 |

|       |          |                                    |                           |                                   |                                    |       |        |           |           |
|-------|----------|------------------------------------|---------------------------|-----------------------------------|------------------------------------|-------|--------|-----------|-----------|
| 15652 | 10389395 | <a href="#">NM_178309</a>          | <a href="#">237911</a>    | BRCA1 interacting protein C-te    | <a href="#">Brip1</a>              | 0.906 | -1.311 | 0.230077  | 0.501055  |
| 15653 | 10585428 | <a href="#">NM_021422</a>          | <a href="#">58233</a>     | DnaJ (Hsp40) homolog, subfamil    | <a href="#">Dnaj4</a>              | 0.906 | -1.445 | 0.190494  | 0.449454  |
| 15654 | 10574230 |                                    |                           |                                   |                                    | 0.906 | -1.573 | 0.158563  | 0.40535   |
| 15655 | 10412392 | <a href="#">ENSMUST00000099152</a> | <a href="#">100038690</a> | predicted gene,<br>ENSMUSG0000007 | <a href="#">ENSMUSG00000074638</a> | 0.906 | -1.714 | 0.128997  | 0.360251  |
| 15656 | 10425000 | <a href="#">NM_145471</a>          | <a href="#">223664</a>    | leucine rich repeat containing    | <a href="#">Lrrc14</a>             | 0.906 | -1.405 | 0.201715  | 0.464266  |
| 15657 | 10499394 | <a href="#">NM_001002011</a>       | <a href="#">16905</a>     | lamin A                           | <a href="#">Lmna</a>               | 0.906 | -1.449 | 0.189283  | 0.447652  |
| 15658 | 10415111 | <a href="#">NM_007537</a>          | <a href="#">12050</a>     | Bcl2-like 2                       | <a href="#">Bcl2l2</a>             | 0.906 | -1.545 | 0.165018  | 0.415127  |
| 15659 | 10474028 | <a href="#">NM_145122</a>          | <a href="#">18633</a>     | peroxisome biogenesis factor 1    | <a href="#">Pex16</a>              | 0.906 | -1.055 | 0.32542   | 0.601773  |
| 15660 | 10457836 | <a href="#">ENSMUST00000097651</a> | <a href="#">100044699</a> | hypothetical protein LOC100044    | <a href="#">LOC100044699</a>       | 0.906 | -1.373 | 0.21103   | 0.476598  |
| 15661 | 10564272 | <a href="#">NM_007390</a>          | <a href="#">11441</a>     | cholinergic receptor, nicotini    | <a href="#">Chrna7</a>             | 0.906 | -0.899 | 0.397582  | 0.664302  |
| 15662 | 10546137 | <a href="#">NM_030251</a>          | <a href="#">80283</a>     | ankyrin repeat and BTB (POZ) d    | <a href="#">Abtb1</a>              | 0.906 | -1.404 | 0.202024  | 0.464803  |
| 15663 | 10498797 | <a href="#">XR_035682</a>          | <a href="#">383883</a>    | similar to Rpl17 protein          | <a href="#">LOC383883</a>          | 0.906 | -0.553 | 0.596659  | 0.81005   |
| 15664 | 10435015 | <a href="#">NM_026898</a>          | <a href="#">68980</a>     | WD repeat domain 53               | <a href="#">Wdr53</a>              | 0.906 | -2.191 | 0.0634861 | 0.233737  |
| 15665 | 10590277 |                                    |                           |                                   |                                    | 0.906 | -0.677 | 0.519416  | 0.757547  |
| 15666 | 10492381 | <a href="#">NM_001033300</a>       | <a href="#">229363</a>    | guanine monphosphate synthetas    | <a href="#">Gmps</a>               | 0.906 | -2.209 | 0.0618024 | 0.229738  |
| 15667 | 10453178 | <a href="#">NM_001081357</a>       | <a href="#">225028</a>    | mitogen-activated protein kina    | <a href="#">Map4k3</a>             | 0.906 | -1.715 | 0.128872  | 0.360128  |
| 15668 | 10471701 | <a href="#">ENSMUST00000100156</a> | <a href="#">100038606</a> | predicted gene,<br>ENSMUSG0000007 | <a href="#">ENSMUSG00000075388</a> | 0.906 | -1.195 | 0.26991   | 0.54456   |
| 15669 | 10452470 | <a href="#">NM_013933</a>          | <a href="#">30960</a>     | vesicle-associated membrane pr    | <a href="#">Vapa</a>               | 0.906 | -2.133 | 0.0691719 | 0.246514  |
| 15670 | 10450772 | <a href="#">NM_201608</a>          | <a href="#">110696</a>    | histocompatibility 2, M region    | <a href="#">H2-M10.3</a>           | 0.906 | -0.778 | 0.46118   | 0.715789  |
| 15671 | 10463227 | <a href="#">BC089359</a>           | <a href="#">628994</a>    | predicted gene, EG628994          | <a href="#">EG628994</a>           | 0.906 | -1.57  | 0.159048  | 0.406199  |
| 15672 | 10397094 | <a href="#">NM_008943</a>          | <a href="#">19164</a>     | presenilin 1                      | <a href="#">Psen1</a>              | 0.906 | -2.325 | 0.0519636 | 0.206172  |
| 15673 | 10456995 | <a href="#">NM_178604</a>          | <a href="#">27366</a>     | thioredoxin-like 4A               | <a href="#">Txnl4a</a>             | 0.906 | -2.397 | 0.0466671 | 0.19197   |
| 15674 | 10442270 | <a href="#">BC098460</a>           | <a href="#">74149</a>     | RIKEN cDNA 1300003B13<br>gene     | <a href="#">1300003B13Rik</a>      | 0.906 | -1.007 | 0.34635   | 0.620403  |
| 15675 | 10565817 |                                    |                           |                                   |                                    | 0.906 | -0.587 | 0.575358  | 0.797076  |
| 15676 | 10452978 | <a href="#">NR_003363</a>          | <a href="#">625054</a>    | predicted gene, EG625054          | <a href="#">EG625054</a>           | 0.906 | -1.346 | 0.21919   | 0.487694  |
| 15677 | 10514366 | <a href="#">ENSMUST00000064404</a> | <a href="#">30926</a>     | glutaredoxin 3                    | <a href="#">Glr3</a>               | 0.906 | -1.619 | 0.148145  | 0.390374  |
| 15678 | 10570379 | <a href="#">NM_011881</a>          | <a href="#">24013</a>     | G protein-coupled receptor kin    | <a href="#">Grk1</a>               | 0.906 | -0.851 | 0.421974  | 0.684306  |
| 15679 | 10367120 |                                    |                           |                                   |                                    | 0.906 | -0.783 | 0.458668  | 0.713672  |
| 15680 | 10491329 | <a href="#">ENSMUST00000057768</a> | <a href="#">67576</a>     | RIKEN cDNA 4930429B21<br>gene     | <a href="#">4930429B21Rik</a>      | 0.906 | -0.745 | 0.479721  | 0.729728  |
| 15681 | 10421486 | <a href="#">AK155102</a>           | <a href="#">100038369</a> | predicted gene,<br>ENSMUSG0000007 | <a href="#">ENSMUSG00000075526</a> | 0.906 | -1.605 | 0.151304  | 0.395197  |
| 15682 | 10510050 |                                    |                           |                                   |                                    | 0.906 | -1.513 | 0.172844  | 0.425203  |
| 15683 | 10537821 | <a href="#">NM_146296</a>          | <a href="#">258293</a>    | olfactory receptor 437            | <a href="#">Olf437</a>             | 0.906 | -1.012 | 0.344356  | 0.618664  |
| 15684 | 10345492 | <a href="#">NM_001039551</a>       | <a href="#">94218</a>     | cyclin M3                         | <a href="#">Cnm3</a>               | 0.906 | -1.787 | 0.115899  | 0.338549  |
| 15685 | 10351404 | <a href="#">NM_001039483</a>       | <a href="#">68944</a>     | transmembrane and coiled-coil     | <a href="#">Tmco1</a>              | 0.906 | -1.762 | 0.120144  | 0.346566  |
| 15686 | 10454445 | <a href="#">AK138158</a>           | <a href="#">654823</a>    | RIKEN cDNA B930094E09<br>gene     | <a href="#">B930094E09Rik</a>      | 0.906 | -1.29  | 0.236842  | 0.508973  |
| 15687 | 10351163 | <a href="#">NM_028776</a>          | <a href="#">240880</a>    | SCY1-like 3 (S. cerevisiae)       | <a href="#">Scyl3</a>              | 0.906 | -2.215 | 0.0612327 | 0.228343  |
| 15688 | 10507328 | <a href="#">NM_011034</a>          | <a href="#">18477</a>     | peroxiredoxin 1                   | <a href="#">Prdx1</a>              | 0.906 | -2.164 | 0.0660445 | 0.239774  |
| 15689 | 10427704 | <a href="#">ENSMUST00000080845</a> | <a href="#">78244</a>     | DnaJ (Hsp40) homolog, subfamil    | <a href="#">Dnajc21</a>            | 0.906 | -2.342 | 0.0506249 | 0.202691  |
| 15690 | 10465895 | <a href="#">NM_019699</a>          | <a href="#">56473</a>     | fatty acid desaturase 2           | <a href="#">Fads2</a>              | 0.906 | -3.082 | 0.0171204 | 0.0987437 |
| 15691 | 10416421 |                                    |                           |                                   |                                    | 0.906 | -1.272 | 0.242919  | 0.51587   |
| 15692 | 10539861 | <a href="#">NM_133933</a>          | <a href="#">103963</a>    | ribophorin I                      | <a href="#">Rpn1</a>               | 0.906 | -1.816 | 0.110938  | 0.329706  |
| 15693 | 10378508 | <a href="#">NM_177325</a>          | <a href="#">104662</a>    | TSR1, 20S rRNA accumulation,<br>h | <a href="#">Tsr1</a>               | 0.906 | -1.369 | 0.212051  | 0.477488  |
| 15694 | 10503989 | <a href="#">ENSMUST00000030114</a> | <a href="#">66434</a>     | RIKEN cDNA 2010003O02<br>gene     | <a href="#">2010003O02Rik</a>      | 0.906 | -1.054 | 0.325935  | 0.602357  |
| 15695 | 10511062 | <a href="#">ENSMUST00000023920</a> | <a href="#">69671</a>     | transmembrane protein 52          | <a href="#">Tmem52</a>             | 0.906 | -1.144 | 0.289014  | 0.565029  |
| 15696 | 10522368 | <a href="#">NM_001081205</a>       | <a href="#">70701</a>     | NIPA-like domain containing 1     | <a href="#">Npal1</a>              | 0.905 | -1.305 | 0.231957  | 0.502664  |
| 15697 | 10594490 | <a href="#">NM_144813</a>          | <a href="#">214111</a>    | solute carrier family 24 (sodi    | <a href="#">Slc24a1</a>            | 0.905 | -1.743 | 0.123654  | 0.351843  |
| 15698 | 10592289 | <a href="#">NM_001081429</a>       | <a href="#">245902</a>    | coiled-coil domain containing     | <a href="#">Ccdc15</a>             | 0.905 | -2.482 | 0.0411129 | 0.176721  |
| 15699 | 10470751 | <a href="#">NM_011989</a>          | <a href="#">26569</a>     | solute carrier family 27 (fatt    | <a href="#">Slc27a4</a>            | 0.905 | -1.731 | 0.125883  | 0.355221  |
| 15700 | 10523293 | <a href="#">ENSMUST00000031330</a> | <a href="#">75610</a>     | RIKEN cDNA 2010109A12<br>gene     | <a href="#">2010109A12Rik</a>      | 0.905 | -0.886 | 0.404128  | 0.668818  |

|       |          |                                    |                           |                                   |                                    |       |        |           |          |
|-------|----------|------------------------------------|---------------------------|-----------------------------------|------------------------------------|-------|--------|-----------|----------|
| 15701 | 10553509 | <a href="#">NM_015580</a>          | <a href="#">10855</a>     | lactate dehydrogenase C           | <a href="#">Ldnc</a>               | 0.905 | -1.888 | 0.0996754 | 0.308576 |
| 15702 | 10465812 | <a href="#">NM_027412</a>          | <a href="#">70387</a>     | tetratricopeptide repeat domai    | <a href="#">Ttc9c</a>              | 0.905 | -0.959 | 0.368586  | 0.639326 |
| 15703 | 10373964 | <a href="#">NM_172438</a>          | <a href="#">107829</a>    | THO complex 5                     | <a href="#">Thoc5</a>              | 0.905 | -1.867 | 0.10287   | 0.314909 |
| 15704 | 10384192 | <a href="#">NM_134011</a>          | <a href="#">21379</a>     | transforming growth factor bet    | <a href="#">Tbrg4</a>              | 0.905 | -1.833 | 0.108167  | 0.32441  |
| 15705 | 10377763 | <a href="#">NM_007493</a>          | <a href="#">11890</a>     | asialoglycoprotein receptor 2     | <a href="#">Asgr2</a>              | 0.905 | -1.065 | 0.321329  | 0.598079 |
| 15706 | 10486754 | <a href="#">NM_178795</a>          | <a href="#">327655</a>    | histidine acid phosphatase dom    | <a href="#">Hisppd2a</a>           | 0.905 | -2.638 | 0.0326551 | 0.151867 |
| 15707 | 10448232 | <a href="#">XR_035724</a>          | <a href="#">545191</a>    | predicted gene, EG545191          | <a href="#">EG545191</a>           | 0.905 | -1.641 | 0.143519  | 0.384139 |
| 15708 | 10357008 | <a href="#">NM_013784</a>          | <a href="#">27392</a>     | phosphatidylinositol glycan an    | <a href="#">Pign</a>               | 0.905 | -1.462 | 0.185989  | 0.44418  |
| 15709 | 10387219 | <a href="#">NM_021329</a>          | <a href="#">57785</a>     | RAN guanine nucleotide release    | <a href="#">Rangrf</a>             | 0.905 | -0.937 | 0.37926   | 0.649054 |
| 15710 | 10469906 | <a href="#">NM_001039386</a>       | <a href="#">56876</a>     | nasal embryonic LHRH factor       | <a href="#">Nelf</a>               | 0.905 | -1.774 | 0.118089  | 0.343079 |
| 15711 | 10418177 | <a href="#">ENSMUST00000064134</a> | <a href="#">100036528</a> | predicted gene,<br>ENSMUSG0000005 | <a href="#">ENSMUSG00000052323</a> | 0.905 | -0.849 | 0.423215  | 0.685496 |
| 15712 | 10378649 | <a href="#">NM_173388</a>          | <a href="#">215113</a>    | solute carrier family 43, memb    | <a href="#">Slc43a2</a>            | 0.905 | -1.091 | 0.31024   | 0.586894 |
| 15713 | 10507231 | <a href="#">NM_001039124</a>       | <a href="#">654462</a>    | kinocilin                         | <a href="#">Kncn</a>               | 0.905 | -1.522 | 0.170674  | 0.422321 |
| 15714 | 10358754 | <a href="#">XR_034437</a>          | <a href="#">639787</a>    | predicted gene, EG639787          | <a href="#">EG639787</a>           | 0.905 | -1.031 | 0.336042  | 0.611732 |
| 15715 | 10603023 |                                    |                           |                                   |                                    | 0.905 | -0.905 | 0.394718  | 0.662293 |
| 15716 | 10522250 | <a href="#">NM_028975</a>          | <a href="#">67878</a>     | transmembrane protein 33          | <a href="#">Tmem33</a>             | 0.905 | -2.362 | 0.0491851 | 0.199006 |
| 15717 | 10418903 | <a href="#">ENSMUST00000096019</a> | <a href="#">432839</a>    | G protein regulated inducer of    | <a href="#">Gprin2</a>             | 0.905 | -1.161 | 0.28252   | 0.55755  |
| 15718 | 10604405 | <a href="#">NM_012019</a>          | <a href="#">26926</a>     | apoptosis-inducing factor, mit    | <a href="#">Aifm1</a>              | 0.905 | -2.482 | 0.0410951 | 0.176721 |
| 15719 | 10583551 | <a href="#">NM_183408</a>          | <a href="#">18577</a>     | phosphodiesterase 4A, cAMP<br>spe | <a href="#">Pde4a</a>              | 0.905 | -1.248 | 0.250888  | 0.524763 |
| 15720 | 10559498 |                                    |                           |                                   |                                    | 0.905 | -1.201 | 0.267687  | 0.542452 |
| 15721 | 10447275 | <a href="#">NM_028576</a>          | <a href="#">73582</a>     | RIKEN cDNA 1700106N22<br>gene     | <a href="#">1700106N22Rik</a>      | 0.905 | -1.346 | 0.219022  | 0.487441 |
| 15722 | 10496373 | <a href="#">NM_030143</a>          | <a href="#">73284</a>     | DNA-damage-inducible transcrip    | <a href="#">Ddit4l</a>             | 0.905 | -1.687 | 0.134148  | 0.369279 |
| 15723 | 10525014 |                                    |                           |                                   |                                    | 0.905 | -0.949 | 0.373111  | 0.643427 |
| 15724 | 10398717 | <a href="#">NM_177374</a>          | <a href="#">328162</a>    | RIKEN cDNA 6720458F09 gene        | <a href="#">6720458F09Rik</a>      | 0.905 | -1.208 | 0.265046  | 0.540178 |
| 15725 | 10552458 | <a href="#">NM_145582</a>          | <a href="#">233189</a>    | ATP binding domain 3              | <a href="#">Atpbd3</a>             | 0.905 | -1.901 | 0.0978068 | 0.304839 |
| 15726 | 10515282 | <a href="#">NM_133681</a>          | <a href="#">66805</a>     | tetraspanin 1                     | <a href="#">Tspan1</a>             | 0.905 | -0.933 | 0.380889  | 0.650316 |
| 15727 | 10434516 | <a href="#">BC092532</a>           | <a href="#">78408</a>     | RIKEN cDNA 2900046G09<br>gene     | <a href="#">2900046G09Rik</a>      | 0.905 | -1.79  | 0.115292  | 0.337519 |
| 15728 | 10414736 | <a href="#">ENSMUST00000103580</a> | <a href="#">640552</a>    | similar to T-cell receptor alp    | <a href="#">LOC640552</a>          | 0.905 | -0.528 | 0.613286  | 0.820877 |
| 15729 | 10516776 | <a href="#">ENSMUST00000097865</a> | <a href="#">100038640</a> | predicted gene,<br>ENSMUSG0000007 | <a href="#">ENSMUSG00000073752</a> | 0.905 | -1.196 | 0.269616  | 0.544449 |
| 15730 | 10537428 | <a href="#">NM_011226</a>          | <a href="#">19331</a>     | RAB19, member RAS oncogene<br>fam | <a href="#">Rab19</a>              | 0.905 | -1.624 | 0.147077  | 0.388984 |
| 15731 | 10566315 | <a href="#">BC058791</a>           | <a href="#">244180</a>    | RIKEN cDNA E030002O03<br>gene     | <a href="#">E030002O03Rik</a>      | 0.905 | -0.973 | 0.362076  | 0.633596 |
| 15732 | 10450762 | <a href="#">NM_177923</a>          | <a href="#">333715</a>    | histocompatibility 2, M region    | <a href="#">H2-M10.2</a>           | 0.905 | -0.606 | 0.563215  | 0.789853 |
| 15733 | 10558825 | <a href="#">NM_153777</a>          | <a href="#">70552</a>     | leucine rich repeat containing    | <a href="#">Lrrc56</a>             | 0.905 | -1.789 | 0.115524  | 0.337938 |
| 15734 | 10552037 | <a href="#">NM_172205</a>          | <a href="#">282619</a>    | suprabasin                        | <a href="#">Sbsn</a>               | 0.905 | -0.787 | 0.456587  | 0.712611 |
| 15735 | 10596383 | <a href="#">NM_001102607</a>       | <a href="#">245026</a>    | RIKEN cDNA E330026B02<br>gene     | <a href="#">E330026B02Rik</a>      | 0.905 | -1.191 | 0.271461  | 0.546126 |
| 15736 | 10415857 | <a href="#">NM_177628</a>          | <a href="#">219148</a>    | cDNA sequence BC065085            | <a href="#">BC065085</a>           | 0.905 | -1.516 | 0.172081  | 0.424165 |
| 15737 | 10526356 | <a href="#">NM_146002</a>          | <a href="#">215160</a>    | rhomboid domain containing 2      | <a href="#">Rhbdd2</a>             | 0.905 | -2.381 | 0.0477854 | 0.194851 |
| 15738 | 10493003 | <a href="#">XM_621583</a>          | <a href="#">546801</a>    | ets variant gene 3-like           | <a href="#">Etv3l</a>              | 0.905 | -0.666 | 0.526403  | 0.7624   |
| 15739 | 10508723 |                                    |                           |                                   |                                    | 0.905 | -0.917 | 0.388737  | 0.657241 |
| 15740 | 10538882 | <a href="#">ENSMUST00000103316</a> | <a href="#">434025</a>    | predicted gene, EG434025          | <a href="#">EG434025</a>           | 0.905 | -0.568 | 0.587422  | 0.804278 |
| 15741 | 10569385 | <a href="#">NM_008554</a>          | <a href="#">17173</a>     | achaete-scute complex homolog     | <a href="#">Ascl2</a>              | 0.905 | -1.076 | 0.316608  | 0.593787 |
| 15742 | 10347214 |                                    |                           |                                   |                                    | 0.905 | -1.425 | 0.196012  | 0.456422 |
| 15743 | 10541799 | <a href="#">BC117528</a>           | <a href="#">381810</a>    | lysophosphatidic acid receptor    | <a href="#">Lpar5</a>              | 0.905 | -0.724 | 0.491814  | 0.738245 |
| 15744 | 10398795 | <a href="#">BC126962</a>           | <a href="#">104816</a>    | RIKEN cDNA A530050D06<br>gene     | <a href="#">A530050D06Rik</a>      | 0.905 | -2.011 | 0.0830344 | 0.276137 |
| 15745 | 10476362 | <a href="#">NM_025676</a>          | <a href="#">66634</a>     | minichromosome maintenance        | <a href="#">Mcm8</a>               | 0.905 | -2.183 | 0.0642238 | 0.235594 |
| 15746 | 10405094 | <a href="#">NM_172015</a>          | <a href="#">105148</a>    | def<br>isoleucine-tRNA synthetase | <a href="#">Iars</a>               | 0.905 | -1.553 | 0.163143  | 0.412125 |
| 15747 | 10600688 | <a href="#">NM_025729</a>          | <a href="#">66724</a>     | mitogen-activated protein kina    | <a href="#">Map3k7ip3</a>          | 0.905 | -1.338 | 0.22145   | 0.490864 |
| 15748 | 10569962 | <a href="#">NM_009138</a>          | <a href="#">20300</a>     | chemokine (C-C motif) ligand 2    | <a href="#">Ccl25</a>              | 0.905 | -0.913 | 0.390805  | 0.659209 |
| 15749 | 10592455 | <a href="#">NM_146828</a>          | <a href="#">258825</a>    | olfactory receptor 975            | <a href="#">Olf975</a>             | 0.905 | -0.78  | 0.460493  | 0.715038 |

|       |          |                                    |                           |                                    |                                    |       |        |           |          |
|-------|----------|------------------------------------|---------------------------|------------------------------------|------------------------------------|-------|--------|-----------|----------|
| 15750 | 10419867 | <a href="#">NM_183174</a>          | <a href="#">239099</a>    | homeodomain leucine zipper-enc     | <a href="#">Homez</a>              | 0.905 | -1.813 | 0.111461  | 0.330397 |
| 15751 | 10462214 |                                    |                           |                                    |                                    | 0.905 | -1.42  | 0.197342  | 0.457905 |
| 15752 | 10593508 | <a href="#">BC080729</a>           | <a href="#">77591</a>     | DEAD (Asp-Glu-Ala-Asp) box pol     | <a href="#">Ddx10</a>              | 0.905 | -1.792 | 0.114942  | 0.337218 |
| 15753 | 10596880 | <a href="#">NM_007567</a>          | <a href="#">12217</a>     | bassoon                            | <a href="#">Bsn</a>                | 0.904 | -1.396 | 0.20411   | 0.467365 |
| 15754 | 10528970 | <a href="#">ENSMUST00000116150</a> | <a href="#">384325</a>    | predicted gene, EG384325           | <a href="#">EG384325</a>           | 0.904 | -0.569 | 0.586727  | 0.803741 |
| 15755 | 10498160 | <a href="#">NM_026435</a>          | <a href="#">67890</a>     | ubiquitin-fold modifier 1          | <a href="#">Ufm1</a>               | 0.904 | -1.845 | 0.106363  | 0.321644 |
| 15756 | 10458251 | <a href="#">NM_030749</a>          | <a href="#">81500</a>     | endoplasmic reticulum chaperon     | <a href="#">Sil1</a>               | 0.904 | -1.861 | 0.103798  | 0.316741 |
| 15757 | 10594251 | <a href="#">NM_024245</a>          | <a href="#">71819</a>     | kinesin family member 23           | <a href="#">Kif23</a>              | 0.904 | -2.043 | 0.0791321 | 0.267921 |
| 15758 | 10495340 | <a href="#">NM_025444</a>          | <a href="#">99730</a>     | TAF13 RNA polymerase II, TATA      | <a href="#">Taf13</a>              | 0.904 | -2.837 | 0.0243748 | 0.125168 |
| 15759 | 10434467 | <a href="#">NM_134101</a>          | <a href="#">21762</a>     | proteasome (prosome, macropain)    | <a href="#">Psm2</a>               | 0.904 | -1.815 | 0.111175  | 0.329929 |
| 15760 | 10375799 | <a href="#">NM_009329</a>          | <a href="#">21408</a>     | zinc finger protein 354A           | <a href="#">Zfp354a</a>            | 0.904 | -1.982 | 0.0867024 | 0.283082 |
| 15761 | 10556302 | <a href="#">NM_009667</a>          | <a href="#">11717</a>     | AMP deaminase 3                    | <a href="#">Ampd3</a>              | 0.904 | -1.643 | 0.143217  | 0.383898 |
| 15762 | 10360934 | <a href="#">NM_026041</a>          | <a href="#">67223</a>     | ribosomal RNA processing 15 ho     | <a href="#">Rrp15</a>              | 0.904 | -1.499 | 0.176264  | 0.430064 |
| 15763 | 10460626 | <a href="#">NM_026616</a>          | <a href="#">68209</a>     | ribonuclease H2, subunit C         | <a href="#">Rnaseh2c</a>           | 0.904 | -1.679 | 0.135832  | 0.371639 |
| 15764 | 10380250 | <a href="#">NR_003492</a>          | <a href="#">72381</a>     | RIKEN cDNA 2210409E12 gene         | <a href="#">2210409E12Rik</a>      | 0.904 | -0.897 | 0.398424  | 0.664689 |
| 15765 | 10362424 |                                    |                           |                                    |                                    | 0.904 | -0.303 | 0.770239  | 0.905037 |
| 15766 | 10398618 | <a href="#">NM_011632</a>          | <a href="#">22031</a>     | Tnf receptor-associated factor     | <a href="#">Traf3</a>              | 0.904 | -2.381 | 0.047819  | 0.194851 |
| 15767 | 10349512 | <a href="#">NM_026390</a>          | <a href="#">67812</a>     | UBX domain containing 2            | <a href="#">Ubx2</a>               | 0.904 | -2.472 | 0.0417306 | 0.178221 |
| 15768 | 10499378 | <a href="#">NM_013658</a>          | <a href="#">20351</a>     | sema domain, immunoglobulin do     | <a href="#">Sema4a</a>             | 0.904 | -1.672 | 0.137219  | 0.373982 |
| 15769 | 10539692 | <a href="#">NM_031199</a>          | <a href="#">21802</a>     | transforming growth factor alp     | <a href="#">Tgfa</a>               | 0.904 | -1.19  | 0.271895  | 0.546343 |
| 15770 | 10564375 |                                    |                           |                                    |                                    | 0.904 | -0.708 | 0.501112  | 0.744172 |
| 15771 | 10405291 | <a href="#">NM_178397</a>          | <a href="#">76577</a>     | UBX domain containing 8            | <a href="#">Ubx8</a>               | 0.904 | -1.845 | 0.106332  | 0.321598 |
| 15772 | 10417841 | <a href="#">ENSMUST00000022349</a> | <a href="#">76670</a>     | tetratricopeptide repeat domai     | <a href="#">Ttc18</a>              | 0.904 | -1.066 | 0.320827  | 0.597681 |
| 15773 | 10365578 | <a href="#">NM_028334</a>          | <a href="#">69736</a>     | nucleoporin 37                     | <a href="#">Nup37</a>              | 0.904 | -2.561 | 0.036571  | 0.163532 |
| 15774 | 10448079 | <a href="#">XM_891173</a>          | <a href="#">626573</a>    | predicted gene, EG626573           | <a href="#">EG626573</a>           | 0.904 | -1.456 | 0.187435  | 0.445746 |
| 15775 | 10541845 | <a href="#">NM_138747</a>          | <a href="#">110109</a>    | nucleolar protein 1                | <a href="#">Nol1</a>               | 0.904 | -1.343 | 0.220106  | 0.488992 |
| 15776 | 10567380 | <a href="#">NM_009470</a>          | <a href="#">22242</a>     | uromodulin                         | <a href="#">Umod</a>               | 0.904 | -0.842 | 0.426877  | 0.688211 |
| 15777 | 10487969 | <a href="#">NM_175113</a>          | <a href="#">66926</a>     | tRNA methyltransferase 6 homol     | <a href="#">Trmt6</a>              | 0.904 | -1.32  | 0.227162  | 0.497938 |
| 15778 | 10355871 | <a href="#">NM_178884</a>          | <a href="#">98733</a>     | obscurin-like 1                    | <a href="#">Obsl1</a>              | 0.904 | -1.883 | 0.100444  | 0.31011  |
| 15779 | 10402262 | <a href="#">XM_001474563</a>       | <a href="#">100040305</a> | hypothetical protein LOC100040     | <a href="#">LOC100040305</a>       | 0.904 | -1.927 | 0.0941733 | 0.297861 |
| 15780 | 10565461 | <a href="#">AK038819</a>           | <a href="#">791393</a>    | predicted gene, ENSMUSG0000005     | <a href="#">ENSMUSG00000052436</a> | 0.904 | -1.737 | 0.124741  | 0.353522 |
| 15781 | 10414374 | <a href="#">NM_008477</a>          | <a href="#">16709</a>     | kinectin 1                         | <a href="#">Ktn1</a>               | 0.904 | -2.673 | 0.0310167 | 0.146945 |
| 15782 | 10607204 | <a href="#">XR_001912</a>          | <a href="#">666730</a>    | predicted gene, EG666730           | <a href="#">EG666730</a>           | 0.904 | -0.898 | 0.3981    | 0.664555 |
| 15783 | 10544148 | <a href="#">NM_001033430</a>       | <a href="#">338523</a>    | jumonji C domain-containing hi     | <a href="#">Jhdm1d</a>             | 0.904 | -1.066 | 0.320609  | 0.597527 |
| 15784 | 10380226 | <a href="#">NM_198013</a>          | <a href="#">103841</a>    | CUE domain containing 1            | <a href="#">Cuedc1</a>             | 0.904 | -2.109 | 0.0717407 | 0.251634 |
| 15785 | 10423471 | <a href="#">NM_008729</a>          | <a href="#">18163</a>     | catenin (cadherin associated p     | <a href="#">Ctnd2</a>              | 0.904 | -1.294 | 0.235543  | 0.50735  |
| 15786 | 10457380 |                                    |                           |                                    |                                    | 0.904 | -1.162 | 0.282084  | 0.557189 |
| 15787 | 10541318 | <a href="#">NM_144512</a>          | <a href="#">14412</a>     | solute carrier family 6 (neuro     | <a href="#">Slc6a13</a>            | 0.904 | -1.037 | 0.33313   | 0.609187 |
| 15788 | 10501190 |                                    |                           |                                    |                                    | 0.904 | -1.284 | 0.238984  | 0.511774 |
| 15789 | 10383853 | <a href="#">NM_029458</a>          | <a href="#">75828</a>     | HORMA domain containing 2          | <a href="#">Hormad2</a>            | 0.904 | -1.509 | 0.173754  | 0.426449 |
| 15790 | 10517053 | <a href="#">NM_001081156</a>       | <a href="#">69539</a>     | RIKEN cDNA 2300002D11 gene         | <a href="#">2300002D11Rik</a>      | 0.904 | -1.396 | 0.20427   | 0.467434 |
| 15791 | 10573194 | <a href="#">NM_025843</a>          | <a href="#">66916</a>     | NADH dehydrogenase (ubiquinone     | <a href="#">Ndufb7</a>             | 0.904 | -2.375 | 0.0482034 | 0.196078 |
| 15792 | 10512480 | <a href="#">NM_019436</a>          | <a href="#">54390</a>     | suppression inducing transmemb     | <a href="#">Sit1</a>               | 0.904 | -0.977 | 0.360377  | 0.632213 |
| 15793 | 10414473 | <a href="#">NM_146666</a>          | <a href="#">258660</a>    | olfactory receptor 736             | <a href="#">Olfr736</a>            | 0.904 | -0.345 | 0.739805  | 0.889275 |
| 15794 | 10566043 | <a href="#">BC025128</a>           | <a href="#">69358</a>     | leucine rich repeat containing     | <a href="#">Lrrc51</a>             | 0.904 | -1.838 | 0.107485  | 0.323096 |
| 15795 | 10515688 | <a href="#">ENSMUST00000075406</a> | <a href="#">230676</a>    | cDNA sequence BC059842             | <a href="#">BC059842</a>           | 0.904 | -0.671 | 0.523244  | 0.759907 |
| 15796 | 10579602 | <a href="#">NM_028189</a>          | <a href="#">72297</a>     | UDP-GlcNAc:betaGal beta-1,3-N-     | <a href="#">B3gnt3</a>             | 0.904 | -1.25  | 0.250426  | 0.524406 |
| 15797 | 10443201 | <a href="#">NM_011861</a>          | <a href="#">23969</a>     | protein kinase C and casein ki     | <a href="#">Pacsin1</a>            | 0.904 | -1.659 | 0.139793  | 0.378113 |
| 15798 | 10415319 | <a href="#">NM_008394</a>          | <a href="#">16391</a>     | interferon regulatory factor 9     | <a href="#">Irf9</a>               | 0.904 | -1.527 | 0.169282  | 0.42056  |
| 15799 | 10449339 |                                    |                           |                                    |                                    | 0.904 | -1.04  | 0.33178   | 0.608173 |
| 15800 | 10545226 |                                    |                           |                                    |                                    | 0.903 | -0.692 | 0.510855  | 0.751986 |
| 15801 | 10594277 | <a href="#">NM_028748</a>          | <a href="#">74090</a>     | progesterone and androgen receptor | <a href="#">Pacr5</a>              | 0.903 | -1.282 | 0.239652  | 0.512719 |

|       |          |                                    |                           |                                   |                                    |       |        |           |          |
|-------|----------|------------------------------------|---------------------------|-----------------------------------|------------------------------------|-------|--------|-----------|----------|
| 15802 | 10381419 | <a href="#">NM_008676</a>          | <a href="#">17966</a>     | neighbor of Brca1 gene 1          | <a href="#">Nbr1</a>               | 0.903 | -2.147 | 0.067737  | 0.243242 |
| 15803 | 10349404 | <a href="#">NM_145128</a>          | <a href="#">107895</a>    | mannoside acetylglucosaminyltr    | <a href="#">Mgat5</a>              | 0.903 | -2.348 | 0.0502153 | 0.201596 |
| 15804 | 10414211 | <a href="#">NM_010775</a>          | <a href="#">17194</a>     | mannose binding lectin (A)        | <a href="#">Mbl1</a>               | 0.903 | -1.277 | 0.241154  | 0.514009 |
| 15805 | 10347697 | <a href="#">NM_009208</a>          | <a href="#">20536</a>     | solute carrier family 4 (anion    | <a href="#">Slc4a3</a>             | 0.903 | -1.613 | 0.149485  | 0.391928 |
| 15806 | 10464015 | <a href="#">NM_019658</a>          | <a href="#">56392</a>     | soc-2 (suppressor of clear) ho    | <a href="#">Shoc2</a>              | 0.903 | -1.813 | 0.111483  | 0.330405 |
| 15807 | 10602765 | <a href="#">NM_001081667</a>       | <a href="#">245683</a>    | kelch-like 34 (Drosophila)        | <a href="#">Klhl34</a>             | 0.903 | -1.514 | 0.172442  | 0.424658 |
| 15808 | 10397666 | <a href="#">NM_029334</a>          | <a href="#">75553</a>     | zinc finger CCCH type containi    | <a href="#">Zc3h14</a>             | 0.903 | -2.597 | 0.0346498 | 0.157998 |
| 15809 | 10346523 | <a href="#">NM_025824</a>          | <a href="#">66882</a>     | basic leucine zipper and W2 do    | <a href="#">Bzw1</a>               | 0.903 | -2.414 | 0.0455218 | 0.18878  |
| 15810 | 10388154 | <a href="#">NM_026068</a>          | <a href="#">67279</a>     | mediator of RNA polymerase II     | <a href="#">Med31</a>              | 0.903 | -1.566 | 0.160002  | 0.407336 |
| 15811 | 10552681 | <a href="#">NM_025368</a>          | <a href="#">66124</a>     | Josephin domain containing 2      | <a href="#">Josd2</a>              | 0.903 | -1.816 | 0.110962  | 0.329706 |
| 15812 | 10508770 | <a href="#">AK142202</a>           | <a href="#">100038703</a> | predicted gene,<br>OTTMUSG0000001 | <a href="#">OTTMUSG00000010099</a> | 0.903 | -2.036 | 0.080005  | 0.269699 |
| 15813 | 10540028 | <a href="#">NM_023184</a>          | <a href="#">66277</a>     | Kruppel-like factor 15            | <a href="#">Klf15</a>              | 0.903 | -1.098 | 0.307523  | 0.584192 |
| 15814 | 10455238 | <a href="#">NM_022996</a>          | <a href="#">65113</a>     | Nedd4 family interacting prote    | <a href="#">Ndfip1</a>             | 0.903 | -2.393 | 0.0469356 | 0.192513 |
| 15815 | 10489983 | <a href="#">ENSMUST00000099065</a> | <a href="#">100038688</a> | predicted gene,<br>ENSMUSG0000007 | <a href="#">ENSMUSG00000074574</a> | 0.903 | -0.8   | 0.449177  | 0.706652 |
| 15816 | 10352973 |                                    |                           |                                   |                                    | 0.903 | -1.925 | 0.0944108 | 0.2983   |
| 15817 | 10355327 | <a href="#">NM_007525</a>          | <a href="#">12021</a>     | BRCA1 associated RING<br>domain 1 | <a href="#">Bard1</a>              | 0.903 | -1.844 | 0.106459  | 0.321797 |
| 15818 | 10583785 | <a href="#">BC150493</a>           | <a href="#">66962</a>     | RIKEN cDNA 2310047B19<br>gene     | <a href="#">2310047B19Rik</a>      | 0.903 | -1.255 | 0.2486    | 0.522089 |
| 15819 | 10518484 | <a href="#">NM_173401</a>          | <a href="#">230903</a>    | F-box protein 44                  | <a href="#">Fbxo44</a>             | 0.903 | -2.265 | 0.0568571 | 0.218146 |
| 15820 | 10423842 | <a href="#">NM_198606</a>          | <a href="#">223499</a>    | WD repeats and SOF domain<br>cont | <a href="#">Wdsof1</a>             | 0.903 | -2.027 | 0.08109   | 0.271716 |
| 15821 | 10433702 | <a href="#">NM_033564</a>          | <a href="#">93734</a>     | Mpv17 transgene, kidney diseas    | <a href="#">Mpv17l</a>             | 0.903 | -1.269 | 0.24371   | 0.516777 |
| 15822 | 10535372 | <a href="#">NM_001033312</a>       | <a href="#">231863</a>    | F-box and leucine-rich repeat     | <a href="#">Fbxl18</a>             | 0.903 | -1.841 | 0.106991  | 0.322599 |
| 15823 | 10574033 | <a href="#">NM_172410</a>          | <a href="#">71805</a>     | nucleoporin 93                    | <a href="#">Nup93</a>              | 0.903 | -2.031 | 0.0805479 | 0.27085  |
| 15824 | 10414805 | <a href="#">ENSMUST00000103607</a> | <a href="#">639655</a>    | T cell receptor alpha variable    | <a href="#">Trav13d-4</a>          | 0.903 | -0.466 | 0.654857  | 0.845369 |
| 15825 | 10562897 | <a href="#">NM_178734</a>          | <a href="#">243963</a>    | zinc finger protein 473           | <a href="#">Zfp473</a>             | 0.903 | -1.211 | 0.263917  | 0.538844 |
| 15826 | 10514645 |                                    |                           |                                   |                                    | 0.903 | -2.01  | 0.0832219 | 0.27639  |
| 15827 | 10528548 | <a href="#">NM_013569</a>          | <a href="#">16511</a>     | potassium voltage-gated channe    | <a href="#">Kcnh2</a>              | 0.903 | -2.071 | 0.0759458 | 0.260936 |
| 15828 | 10399212 | <a href="#">AK132117</a>           | <a href="#">217951</a>    | transmembrane protein 196         | <a href="#">Tmem196</a>            | 0.903 | -0.99  | 0.354084  | 0.62682  |
| 15829 | 10467191 | <a href="#">NM_013468</a>          | <a href="#">107765</a>    | ankyrin repeat domain 1 (cardi    | <a href="#">Ankrd1</a>             | 0.903 | -1.539 | 0.166472  | 0.417266 |
| 15830 | 10584841 | <a href="#">NM_001005421</a>       | <a href="#">270152</a>    | adhesion molecule, interacts w    | <a href="#">Amica1</a>             | 0.903 | -1.182 | 0.274779  | 0.549506 |
| 15831 | 10346328 | <a href="#">BC132343</a>           | <a href="#">212679</a>    | methionine-tRNA synthetase 2 (    | <a href="#">Mars2</a>              | 0.903 | -1.839 | 0.107232  | 0.322736 |
| 15832 | 10532620 | <a href="#">XM_912851</a>          | <a href="#">74376</a>     | myosin XVIIIb                     | <a href="#">Myo18b</a>             | 0.903 | -1.325 | 0.22571   | 0.496094 |
| 15833 | 10536794 | <a href="#">NM_023516</a>          | <a href="#">69573</a>     | RIKEN cDNA 2310016C08<br>gene     | <a href="#">2310016C08Rik</a>      | 0.903 | -2.604 | 0.0342954 | 0.156855 |
| 15834 | 10564704 | <a href="#">NM_178255</a>          | <a href="#">67666</a>     | hyaluronan and proteoglycan li    | <a href="#">Hapln3</a>             | 0.903 | -1.822 | 0.110041  | 0.328028 |
| 15835 | 10557528 | <a href="#">NM_172747</a>          | <a href="#">233877</a>    | potassium channel tetramerisat    | <a href="#">Kctd13</a>             | 0.903 | -0.995 | 0.351769  | 0.624867 |
| 15836 | 10384423 | <a href="#">NM_172496</a>          | <a href="#">12808</a>     | cordons-bleu                      | <a href="#">Cobl</a>               | 0.903 | -0.785 | 0.45772   | 0.713313 |
| 15837 | 10457853 | <a href="#">BC060961</a>           | <a href="#">225280</a>    | RIKEN cDNA D030070L09<br>gene     | <a href="#">D030070L09Rik</a>      | 0.903 | -1.491 | 0.178363  | 0.433134 |
| 15838 | 10369890 | <a href="#">XR_032286</a>          | <a href="#">216081</a>    | similar to phosphoribosylamino    | <a href="#">LOC216081</a>          | 0.903 | -0.913 | 0.39085   | 0.659231 |
| 15839 | 10489406 | <a href="#">NM_183023</a>          | <a href="#">241770</a>    | regulating synaptic membrane e    | <a href="#">Rims4</a>              | 0.903 | -1.762 | 0.120112  | 0.346527 |
| 15840 | 10531348 | <a href="#">NM_011148</a>          | <a href="#">19023</a>     | protein phosphatase, EF hand c    | <a href="#">Ppef2</a>              | 0.903 | -0.756 | 0.473453  | 0.725045 |
| 15841 | 10549536 | <a href="#">NM_001113424</a>       | <a href="#">232566</a>    | antagonist of mitotic exit net    | <a href="#">Amn1</a>               | 0.903 | -2.503 | 0.0398799 | 0.173611 |
| 15842 | 10526482 | <a href="#">NM_011293</a>          | <a href="#">20022</a>     | polymerase (RNA) II (DNA<br>direc | <a href="#">Polr2j</a>             | 0.903 | -1.659 | 0.139807  | 0.378113 |
| 15843 | 10408475 | <a href="#">NM_010093</a>          | <a href="#">13557</a>     | E2F transcription factor 3        | <a href="#">E2f3</a>               | 0.903 | -1.743 | 0.123591  | 0.351711 |
| 15844 | 10407281 | <a href="#">NM_023612</a>          | <a href="#">71690</a>     | endothelial cell-specific mole    | <a href="#">Esm1</a>               | 0.903 | -1.306 | 0.231754  | 0.502487 |
| 15845 | 10536297 | <a href="#">NM_181595</a>          | <a href="#">243725</a>    | protein phosphatase 1, regulat    | <a href="#">Ppp1r9a</a>            | 0.903 | -1.982 | 0.0867277 | 0.283113 |
| 15846 | 10423271 | <a href="#">XM_001487793</a>       | <a href="#">320865</a>    | cadherin 18                       | <a href="#">Cdh18</a>              | 0.903 | -1.688 | 0.133989  | 0.368936 |
| 15847 | 10597266 |                                    |                           |                                   |                                    | 0.903 | -0.615 | 0.55772   | 0.785788 |
| 15848 | 10445710 | <a href="#">NM_144939</a>          | <a href="#">107971</a>    | fibroblast growth factor recep    | <a href="#">Frs3</a>               | 0.903 | -1.766 | 0.119485  | 0.345748 |
| 15849 | 10505457 | <a href="#">AK017104</a>           | <a href="#">66783</a>     | RIKEN cDNA 4933437N03<br>gene     | <a href="#">4933437N03Rik</a>      | 0.903 | -0.828 | 0.433972  | 0.694408 |
| 15850 | 10385159 | <a href="#">NM_025936</a>          | <a href="#">104458</a>    | arginyl-tRNA synthetase           | <a href="#">Rars</a>               | 0.903 | -2.391 | 0.0470678 | 0.192831 |

|       |          |                                    |                           |                                    |                                    |       |        |           |           |
|-------|----------|------------------------------------|---------------------------|------------------------------------|------------------------------------|-------|--------|-----------|-----------|
| 15851 | 10387909 | <a href="#">NM_009603</a>          | <a href="#">11448</a>     | cholinergic receptor, nicotin      | <a href="#">Chrne</a>              | 0.903 | -0.701 | 0.50512   | 0.747176  |
| 15852 | 10367434 | <a href="#">AK086046</a>           | <a href="#">100038704</a> | predicted gene,<br>ENSMUSG00000006 | <a href="#">ENSMUSG00000065996</a> | 0.903 | -1.969 | 0.088469  | 0.28668   |
| 15853 | 10382985 | <a href="#">NM_027827</a>          | <a href="#">71562</a>     | arylfornamidase                    | <a href="#">Afmid</a>              | 0.903 | -1.673 | 0.137021  | 0.373617  |
| 15854 | 10366698 | <a href="#">BC065058</a>           | <a href="#">270802</a>    | cDNA sequence BC048403             | <a href="#">BC048403</a>           | 0.903 | -2.348 | 0.0502274 | 0.201596  |
| 15855 | 10532857 | <a href="#">NM_019821</a>          | <a href="#">56356</a>     | glycolipid transfer protein        | <a href="#">Gltp</a>               | 0.903 | -3.093 | 0.016853  | 0.0977778 |
| 15856 | 10524384 | <a href="#">ENSMUST00000100882</a> | <a href="#">625464</a>    | predicted gene, EG625464           | <a href="#">EG625464</a>           | 0.903 | -0.697 | 0.507554  | 0.749509  |
| 15857 | 10491406 | <a href="#">NM_025316</a>          | <a href="#">66046</a>     | NADH dehydrogenase<br>(ubiquinone) | <a href="#">Ndufb5</a>             | 0.903 | -2.657 | 0.031744  | 0.149088  |
| 15858 | 10419038 | <a href="#">NM_078478</a>          | <a href="#">66092</a>     | growth hormone inducible trans     | <a href="#">Ghitm</a>              | 0.903 | -2.083 | 0.0745705 | 0.258248  |
| 15859 | 10346235 | <a href="#">NM_146108</a>          | <a href="#">227095</a>    | 3-hydroxyisobutyryl-Coenzyme<br>A  | <a href="#">Hibch</a>              | 0.903 | -1.639 | 0.143993  | 0.384952  |
| 15860 | 10375529 | <a href="#">NM_001024846</a>       | <a href="#">22720</a>     | zinc finger protein 62             | <a href="#">Zfp62</a>              | 0.903 | -1.902 | 0.0976985 | 0.304546  |
| 15861 | 10523778 | <a href="#">ENSMUST00000055994</a> | <a href="#">320751</a>    | RIKEN cDNA D830014E11<br>gene      | <a href="#">D830014E11Rik</a>      | 0.903 | -2.133 | 0.0691801 | 0.246514  |
| 15862 | 10549700 | <a href="#">NM_146177</a>          | <a href="#">232811</a>    | suppressor of variegation 4-20     | <a href="#">Suv420h2</a>           | 0.903 | -1.773 | 0.118223  | 0.343225  |
| 15863 | 10500347 | <a href="#">BC107364</a>           | <a href="#">329716</a>    | cDNA sequence BC107364             | <a href="#">BC107364</a>           | 0.902 | -0.784 | 0.458016  | 0.713341  |
| 15864 | 10589329 | <a href="#">NM_173019</a>          | <a href="#">270198</a>    | 6-phosphofructo-2-kinase/fruct     | <a href="#">Pfkfb4</a>             | 0.902 | -0.866 | 0.414327  | 0.677534  |
| 15865 | 10571207 | <a href="#">NM_025869</a>          | <a href="#">66959</a>     | dual specificity phosphatase 2     | <a href="#">Dusp26</a>             | 0.902 | -1.452 | 0.188537  | 0.446595  |
| 15866 | 10462861 | <a href="#">XR_034565</a>          | <a href="#">240657</a>    | similar to peptidase (prosome,     | <a href="#">LOC240657</a>          | 0.902 | -2.006 | 0.0837227 | 0.277205  |
| 15867 | 10460693 | <a href="#">ENSMUST00000052291</a> | <a href="#">69595</a>     | predicted gene,<br>ENSMUSG00000004 | <a href="#">ENSMUSG00000043488</a> | 0.902 | -1.103 | 0.305277  | 0.581669  |
| 15868 | 10465571 | <a href="#">NM_020566</a>          | <a href="#">57431</a>     | DnaJ (Hsp40) homolog, subfamil     | <a href="#">Dnajc4</a>             | 0.902 | -2.045 | 0.0788964 | 0.267427  |
| 15869 | 10429885 | <a href="#">NM_025340</a>          | <a href="#">106025</a>    | SHANK-associated RH domain<br>int  | <a href="#">Sharpin</a>            | 0.902 | -1.948 | 0.0911734 | 0.292175  |
| 15870 | 10534575 | <a href="#">NM_025774</a>          | <a href="#">66801</a>     | Prkr interacting protein 1 (IL     | <a href="#">Prkrip1</a>            | 0.902 | -1.502 | 0.175668  | 0.429204  |
| 15871 | 10385153 | <a href="#">NM_027411</a>          | <a href="#">70385</a>     | coiled-coil domain containing      | <a href="#">Ccdc99</a>             | 0.902 | -1.548 | 0.164191  | 0.413859  |
| 15872 | 10466008 | <a href="#">NM_145496</a>          | <a href="#">225913</a>    | dihydroxyacetone kinase 2 homo     | <a href="#">Dak</a>                | 0.902 | -1.239 | 0.254203  | 0.528502  |
| 15873 | 10490080 | <a href="#">NM_009996</a>          | <a href="#">13081</a>     | cytochrome P450, family 24, su     | <a href="#">Cyp24a1</a>            | 0.902 | -0.94  | 0.377497  | 0.647352  |
| 15874 | 10382049 | <a href="#">NM_028074</a>          | <a href="#">72047</a>     | DEAD (Asp-Glu-Ala-Asp) box<br>pol  | <a href="#">Ddx42</a>              | 0.902 | -2.028 | 0.0809331 | 0.27167   |
| 15875 | 10420385 | <a href="#">NM_026526</a>          | <a href="#">68043</a>     | N-6 adenine-specific DNA<br>methy  | <a href="#">N6amt2</a>             | 0.902 | -3.075 | 0.0172843 | 0.0993635 |
| 15876 | 10403951 | <a href="#">NM_178202</a>          | <a href="#">319188</a>    | histone cluster 1, H2bp            | <a href="#">Hist1h2bp</a>          | 0.902 | -0.977 | 0.359997  | 0.632103  |
| 15877 | 10441794 | <a href="#">NM_030726</a>          | <a href="#">80978</a>     | MAS-related GPR, member H          | <a href="#">Mrgprh</a>             | 0.902 | -0.989 | 0.354589  | 0.62719   |
| 15878 | 10508917 | <a href="#">ENSMUST00000040805</a> | <a href="#">230806</a>    | absent in melanoma 1-like          | <a href="#">Aim1l</a>              | 0.902 | -1.25  | 0.250239  | 0.524321  |
| 15879 | 10518532 | <a href="#">NM_145556</a>          | <a href="#">230908</a>    | TAR DNA binding protein            | <a href="#">Tardbp</a>             | 0.902 | -1.814 | 0.111383  | 0.330259  |
| 15880 | 10373616 | <a href="#">NM_146863</a>          | <a href="#">258862</a>    | olfactory receptor 770             | <a href="#">Olfr770</a>            | 0.902 | -0.729 | 0.488954  | 0.736349  |
| 15881 | 10450808 | <a href="#">NM_001033235</a>       | <a href="#">195359</a>    | tripartite motif-containing 40     | <a href="#">Trim40</a>             | 0.902 | -1.329 | 0.224364  | 0.494324  |
| 15882 | 10414522 | <a href="#">NM_009687</a>          | <a href="#">11792</a>     | apurinic/aprimidinic endonucl      | <a href="#">Apex1</a>              | 0.902 | -2.034 | 0.0802173 | 0.270211  |
| 15883 | 10551511 | <a href="#">NM_022024</a>          | <a href="#">63986</a>     | glia maturation factor, gamma      | <a href="#">Gmfg</a>               | 0.902 | -1.036 | 0.333715  | 0.609432  |
| 15884 | 10351966 | <a href="#">NM_146761</a>          | <a href="#">258756</a>    | olfactory receptor 414             | <a href="#">Olfr414</a>            | 0.902 | -1.405 | 0.201722  | 0.464266  |
| 15885 | 10520501 | <a href="#">BC060996</a>           | <a href="#">75434</a>     | RIKEN cDNA 1700001C02<br>gene      | <a href="#">1700001C02Rik</a>      | 0.902 | -1.199 | 0.268287  | 0.542786  |
| 15886 | 10409016 | <a href="#">NM_175340</a>          | <a href="#">105193</a>    | NHL repeat containing 1            | <a href="#">Nhlrc1</a>             | 0.902 | -1.167 | 0.280192  | 0.555564  |
| 15887 | 10542518 |                                    |                           |                                    |                                    | 0.902 | -0.924 | 0.38531   | 0.654508  |
| 15888 | 10481900 | <a href="#">NM_145522</a>          | <a href="#">227746</a>    | Rab9 effector protein with kel     | <a href="#">Rabepk</a>             | 0.902 | -2.099 | 0.0728306 | 0.254366  |
| 15889 | 10542192 | <a href="#">BC120661</a>           | <a href="#">330428</a>    | RIKEN cDNA D630042F21<br>gene      | <a href="#">D630042F21Rik</a>      | 0.902 | -1.447 | 0.189908  | 0.448565  |
| 15890 | 10410291 | <a href="#">NM_001003666</a>       | <a href="#">431706</a>    | zinc finger protein 457            | <a href="#">Zfp457</a>             | 0.902 | -0.659 | 0.530219  | 0.765382  |
| 15891 | 10438098 | <a href="#">NM_022324</a>          | <a href="#">64136</a>     | stromal cell-derived factor 2-     | <a href="#">Sdf2l1</a>             | 0.902 | -1.463 | 0.185555  | 0.44347   |
| 15892 | 10468527 | <a href="#">ENSMUST00000025996</a> | <a href="#">381232</a>    | RIKEN cDNA 5830416P10 gene         | <a href="#">5830416P10Rik</a>      | 0.902 | -0.874 | 0.410168  | 0.674542  |
| 15893 | 10503315 | <a href="#">NM_001039556</a>       | <a href="#">623474</a>    | RIKEN cDNA E130016E03<br>gene      | <a href="#">E130016E03Rik</a>      | 0.902 | -1.95  | 0.0909305 | 0.291551  |
| 15894 | 10443383 | <a href="#">NM_026571</a>          | <a href="#">328789</a>    | tetraspan transmembrane protei     | <a href="#">Tmhs</a>               | 0.902 | -1.572 | 0.158658  | 0.405496  |
| 15895 | 10403193 | <a href="#">NM_009239</a>          | <a href="#">20688</a>     | trans-acting transcription fac     | <a href="#">Sp4</a>                | 0.902 | -2.156 | 0.0668521 | 0.241483  |
| 15896 | 10377603 | <a href="#">ENSMUST00000100977</a> | <a href="#">74341</a>     | RIKEN cDNA G630025P09<br>gene      | <a href="#">G630025P09Rik</a>      | 0.902 | -1.188 | 0.272355  | 0.54694   |
| 15897 | 10432746 | <a href="#">NM_133357</a>          | <a href="#">109052</a>    | keratin 75                         | <a href="#">Krt75</a>              | 0.902 | -2.042 | 0.0792903 | 0.268093  |

|       |          |                                    |                           |                                   |                                    |       |        |           |          |
|-------|----------|------------------------------------|---------------------------|-----------------------------------|------------------------------------|-------|--------|-----------|----------|
| 15898 | 10442736 | <a href="#">BC094389</a>           | <a href="#">214489</a>    | cDNA sequence BC003965            | <a href="#">BC003965</a>           | 0.902 | -1.284 | 0.238815  | 0.511601 |
| 15899 | 10406519 | <a href="#">NM_013500</a>          | <a href="#">12950</a>     | hyaluronan and proteoglycan li    | <a href="#">Hapln1</a>             | 0.902 | -0.555 | 0.595466  | 0.809472 |
| 15900 | 10389127 | <a href="#">AK040863</a>           | <a href="#">100038761</a> | predicted gene,<br>ENSMUSG0000005 | <a href="#">ENSMUSG00000054421</a> | 0.902 | -0.938 | 0.378757  | 0.648404 |
| 15901 | 10498547 | <a href="#">NM_145820</a>          | <a href="#">72789</a>     | ventricular zone expressed PH     | <a href="#">Veph1</a>              | 0.902 | -1.659 | 0.139755  | 0.378113 |
| 15902 | 10449295 | <a href="#">NM_026307</a>          | <a href="#">67675</a>     | cutA divalent cation tolerance    | <a href="#">Cuta</a>               | 0.902 | -2.141 | 0.0684179 | 0.244528 |
| 15903 | 10344835 |                                    |                           |                                   |                                    | 0.902 | -0.877 | 0.408573  | 0.672914 |
| 15904 | 10572408 | <a href="#">NM_001111066</a>       | <a href="#">14232</a>     | FK506 binding protein 8           | <a href="#">Fkbp8</a>              | 0.902 | -1.506 | 0.174601  | 0.427682 |
| 15905 | 10420261 | <a href="#">NM_007800</a>          | <a href="#">13035</a>     | cathepsin G                       | <a href="#">Ctsg</a>               | 0.902 | -0.722 | 0.492885  | 0.73872  |
| 15906 | 10452496 | <a href="#">NM_009067</a>          | <a href="#">19765</a>     | ralA binding protein 1            | <a href="#">Ralbp1</a>             | 0.902 | -2.25  | 0.0581247 | 0.22132  |
| 15907 | 10347748 | <a href="#">NM_028817</a>          | <a href="#">74205</a>     | acyl-CoA synthetase long-chain    | <a href="#">Acsl3</a>              | 0.902 | -2.422 | 0.0449734 | 0.187645 |
| 15908 | 10516246 | <a href="#">NM_026560</a>          | <a href="#">52276</a>     | cell division cycle associated    | <a href="#">Cdca8</a>              | 0.902 | -1.49  | 0.178653  | 0.43364  |
| 15909 | 10395163 | <a href="#">NM_008482</a>          | <a href="#">16777</a>     | laminin B1 subunit 1              | <a href="#">Lamb1-1</a>            | 0.902 | -1.527 | 0.169415  | 0.420782 |
| 15910 | 10390090 | <a href="#">NM_009161</a>          | <a href="#">20391</a>     | sarcoglycan, alpha (dystrophin    | <a href="#">Sgca</a>               | 0.902 | -1.452 | 0.188565  | 0.446595 |
| 15911 | 10524568 | <a href="#">BC057022</a>           | <a href="#">433940</a>    | cDNA sequence BC057022            | <a href="#">BC057022</a>           | 0.902 | -2.243 | 0.058718  | 0.222896 |
| 15912 | 10350823 | <a href="#">NM_009595</a>          | <a href="#">11352</a>     | v-abl Abelson murine leukemia     | <a href="#">Abl2</a>               | 0.902 | -1.524 | 0.170185  | 0.421869 |
| 15913 | 10595000 | <a href="#">NM_025623</a>          | <a href="#">96236</a>     | nipsnap homolog 3A (C. elegans    | <a href="#">Nipsnap3a</a>          | 0.902 | -1.308 | 0.230902  | 0.501642 |
| 15914 | 10379496 | <a href="#">NM_029367</a>          | <a href="#">73622</a>     | sperm acrosome-associated 3       | <a href="#">Spaca3</a>             | 0.902 | -1.16  | 0.282886  | 0.358177 |
| 15915 | 10562211 | <a href="#">NM_052992</a>          | <a href="#">56188</a>     | FXYD domain-containing ion tra    | <a href="#">Fxyd1</a>              | 0.902 | -1.637 | 0.144389  | 0.385687 |
| 15916 | 10502329 | <a href="#">NM_025902</a>          | <a href="#">67006</a>     | CDGSH iron sulfur domain 2        | <a href="#">Cisd2</a>              | 0.901 | -2.123 | 0.0702455 | 0.248316 |
| 15917 | 10568997 | <a href="#">NM_022433</a>          | <a href="#">64384</a>     | sirtuin 3 (silent mating type     | <a href="#">Sirt3</a>              | 0.901 | -1.383 | 0.208002  | 0.472478 |
| 15918 | 10504630 |                                    |                           |                                   |                                    | 0.901 | -0.753 | 0.475209  | 0.726714 |
| 15919 | 10559818 |                                    |                           |                                   |                                    | 0.901 | -1.304 | 0.232416  | 0.50335  |
| 15920 | 10379981 | <a href="#">NM_175004</a>          | <a href="#">217057</a>    | peptidyl-tRNA hydrolase 2         | <a href="#">Ptrh2</a>              | 0.901 | -2.707 | 0.0294754 | 0.141836 |
| 15921 | 10470444 |                                    |                           |                                   |                                    | 0.901 | -0.464 | 0.65648   | 0.846173 |
| 15922 | 10588357 | <a href="#">NM_175324</a>          | <a href="#">102632</a>    | acyl-Coenzyme A<br>dehydrogenase  | <a href="#">Acad11</a>             | 0.901 | -1.058 | 0.324377  | 0.600843 |
| 15923 | 10495549 | <a href="#">NM_010022</a>          | <a href="#">13171</a>     | dihydroipoamide branched chai     | <a href="#">Dbt</a>                | 0.901 | -2.708 | 0.0294385 | 0.141691 |
| 15924 | 10394040 | <a href="#">NM_027874</a>          | <a href="#">104318</a>    | casein kinase 1, delta            | <a href="#">Csnk1d</a>             | 0.901 | -2.128 | 0.0697717 | 0.247552 |
| 15925 | 10560063 | <a href="#">NM_026885</a>          | <a href="#">68953</a>     | chromatin modifying protein 2A    | <a href="#">Chmp2a</a>             | 0.901 | -1.852 | 0.10523   | 0.319497 |
| 15926 | 10533633 | <a href="#">NM_023232</a>          | <a href="#">66593</a>     | diablo homolog (Drosophila)       | <a href="#">Diablo</a>             | 0.901 | -1.653 | 0.141098  | 0.380048 |
| 15927 | 10429621 | <a href="#">NM_194350</a>          | <a href="#">378435</a>    | v-maf musculoaponeurotic fibro    | <a href="#">Mafa</a>               | 0.901 | -1.813 | 0.11141   | 0.330293 |
| 15928 | 10375864 | <a href="#">NM_028398</a>          | <a href="#">72947</a>     | alanine-glyoxylate aminotransf    | <a href="#">Agxt2l2</a>            | 0.901 | -1.966 | 0.0887924 | 0.287288 |
| 15929 | 10567213 | <a href="#">XR_033846</a>          | <a href="#">100047986</a> | similar to eukaryotic translat    | <a href="#">LOC100047986</a>       | 0.901 | -1.968 | 0.0885877 | 0.286933 |
| 15930 | 10364955 | <a href="#">NM_022653</a>          | <a href="#">50492</a>     | thimet oligopeptidase 1           | <a href="#">Thop1</a>              | 0.901 | -2.927 | 0.0213766 | 0.114508 |
| 15931 | 10373944 | <a href="#">NM_026015</a>          | <a href="#">67178</a>     | zinc finger, matrin type 5        | <a href="#">Zmat5</a>              | 0.901 | -1.596 | 0.153184  | 0.397268 |
| 15932 | 10348580 | <a href="#">NM_027551</a>          | <a href="#">70788</a>     | kelch-like 30 (Drosophila)        | <a href="#">Klhl30</a>             | 0.901 | -1.168 | 0.279898  | 0.555279 |
| 15933 | 10405911 | <a href="#">NM_172392</a>          | <a href="#">268670</a>    | zinc finger protein 759           | <a href="#">Zfp759</a>             | 0.901 | -1.163 | 0.282017  | 0.557182 |
| 15934 | 10461160 |                                    |                           |                                   |                                    | 0.901 | -0.727 | 0.490086  | 0.737262 |
| 15935 | 10414372 | <a href="#">ENSMUST00000100667</a> | <a href="#">625730</a>    | predicted gene, EG625730          | <a href="#">EG625730</a>           | 0.901 | -1.618 | 0.148529  | 0.390852 |
| 15936 | 10475772 | <a href="#">NM_139308</a>          | <a href="#">99138</a>     | START domain containing 7         | <a href="#">Stard7</a>             | 0.901 | -1.778 | 0.117309  | 0.341384 |
| 15937 | 10504466 | <a href="#">AK038173</a>           | <a href="#">623796</a>    | predicted gene,<br>OTTMUSG0000000 | <a href="#">OTTMUSG00000007209</a> | 0.901 | -1.372 | 0.211342  | 0.476813 |
| 15938 | 10407982 | <a href="#">NM_175688</a>          | <a href="#">319293</a>    | RIKEN cDNA A530099J19 gene        | <a href="#">A530099J19Rik</a>      | 0.901 | -0.467 | 0.654197  | 0.845136 |
| 15939 | 10508099 | <a href="#">NM_172701</a>          | <a href="#">230751</a>    | RIKEN cDNA 1810007P19 gene        | <a href="#">1810007P19Rik</a>      | 0.901 | -1.779 | 0.117131  | 0.3411   |
| 15940 | 10476582 | <a href="#">NM_028387</a>          | <a href="#">72899</a>     | MACRO domain containing 2         | <a href="#">Macro2</a>             | 0.901 | -1.024 | 0.339011  | 0.614614 |
| 15941 | 10566398 | <a href="#">NM_147096</a>          | <a href="#">259100</a>    | olfactory receptor 666            | <a href="#">Olfr666</a>            | 0.901 | -1.07  | 0.319148  | 0.59633  |
| 15942 | 10565620 | <a href="#">AK037770</a>           | <a href="#">434213</a>    | predicted gene,<br>ENSMUSG0000005 | <a href="#">ENSMUSG00000056003</a> | 0.901 | -1.035 | 0.334303  | 0.609879 |
| 15943 | 10387971 | <a href="#">NM_213729</a>          | <a href="#">103844</a>    | expressed sequence AI842396       | <a href="#">AI842396</a>           | 0.901 | -1.755 | 0.121447  | 0.347955 |
| 15944 | 10380672 | <a href="#">NM_001033186</a>       | <a href="#">78473</a>     | src family associated phosphop    | <a href="#">Skap1</a>              | 0.901 | -1.575 | 0.157952  | 0.405065 |
| 15945 | 10406139 |                                    |                           |                                   |                                    | 0.901 | -1.526 | 0.169662  | 0.420989 |
| 15946 | 10469514 | <a href="#">NM_007552</a>          | <a href="#">12151</a>     | Bmi1 polycomb ring finger onco    | <a href="#">Bmi1</a>               | 0.901 | -2.05  | 0.0782935 | 0.26619  |
| 15947 | 10543082 | <a href="#">NM_001037865</a>       | <a href="#">213945</a>    | collagen, type XXVIII, alpha 1    | <a href="#">Col28a1</a>            | 0.901 | -1.382 | 0.208368  | 0.473022 |
| 15948 | 10417734 | <a href="#">NM_011584</a>          | <a href="#">353187</a>    | nuclear receptor subfamily 1,     | <a href="#">Nr1d2</a>              | 0.901 | -1.574 | 0.158272  | 0.405195 |
| 15949 | 10351583 | <a href="#">NM_011070</a>          | <a href="#">18637</a>     | prefoldin 2                       | <a href="#">Pfdn2</a>              | 0.901 | -2.123 | 0.0702472 | 0.248316 |
| 15950 | 10565360 |                                    |                           |                                   |                                    | 0.901 | -1.231 | 0.256798  | 0.531129 |
| 15951 | 10462525 | <a href="#">NM_052086</a>          | <a href="#">70760</a>     | myosin and coiled body phos       | <a href="#">Myo1</a>               | 0.901 | -1.002 | 0.0075021 | 0.204251 |

|       |          |                                    |                           |                                |                                    |       |        |           |          |
|-------|----------|------------------------------------|---------------------------|--------------------------------|------------------------------------|-------|--------|-----------|----------|
| 15951 | 10403553 | <a href="#">NM_035080</a>          | <a href="#">10709</a>     | nucleolar and cone-body phos   | <a href="#">Noic1</a>              | 0.901 | -1.903 | 0.0975051 | 0.304231 |
| 15952 | 10538781 | <a href="#">AF037047</a>           | <a href="#">667141</a>    | predicted gene, EG667141       | <a href="#">EG667141</a>           | 0.901 | -1.13  | 0.294671  | 0.570978 |
| 15953 | 10461487 | <a href="#">NM_201351</a>          | <a href="#">225912</a>    | cytochrome b, ascorbate depend | <a href="#">Cybasc3</a>            | 0.901 | -2.122 | 0.0703549 | 0.24851  |
| 15954 | 10347724 | <a href="#">ENSMUST00000097692</a> | <a href="#">20536</a>     | solute carrier family 4 (anion | <a href="#">Slc4a3</a>             | 0.901 | -0.586 | 0.575578  | 0.797076 |
| 15955 | 10427814 |                                    |                           |                                |                                    | 0.901 | -1.862 | 0.103696  | 0.316611 |
| 15956 | 10410209 | <a href="#">NM_019743</a>          | <a href="#">56353</a>     | RING1 and YY1 binding protein  | <a href="#">Rybp</a>               | 0.901 | -2.899 | 0.0222896 | 0.117676 |
| 15957 | 10550605 | <a href="#">BC055476</a>           | <a href="#">72205</a>     | echinoderm microtubule associa | <a href="#">Eml2</a>               | 0.901 | -1.808 | 0.112368  | 0.332063 |
| 15958 | 10457020 |                                    |                           |                                |                                    | 0.901 | -0.731 | 0.488114  | 0.735812 |
| 15959 | 10434007 | <a href="#">NM_175178</a>          | <a href="#">72168</a>     | apoptosis-inducing factor, mit | <a href="#">Aifm3</a>              | 0.901 | -1.737 | 0.124723  | 0.353522 |
| 15960 | 10378059 | <a href="#">NM_026559</a>          | <a href="#">52700</a>     | thioredoxin domain containing  | <a href="#">Txndc17</a>            | 0.901 | -2.664 | 0.0314115 | 0.148244 |
| 15961 | 10475686 | <a href="#">NM_175550</a>          | <a href="#">108011</a>    | adaptor-related protein comple | <a href="#">Ap4e1</a>              | 0.901 | -1.357 | 0.215667  | 0.482802 |
| 15962 | 10559500 | <a href="#">AK011493</a>           | <a href="#">57776</a>     | tweety homolog 1 (Drosophila)  | <a href="#">Ttyh1</a>              | 0.901 | -1.209 | 0.264835  | 0.540056 |
| 15963 | 10497173 | <a href="#">NM_008994</a>          | <a href="#">19302</a>     | peroxisome biogenesis factor 2 | <a href="#">Pex2</a>               | 0.901 | -2.347 | 0.0502799 | 0.201609 |
| 15964 | 10477129 | <a href="#">NM_207276</a>          | <a href="#">403172</a>    | defensin beta 21               | <a href="#">Defb21</a>             | 0.901 | -1.709 | 0.129867  | 0.361535 |
| 15965 | 10529584 | <a href="#">NM_008550</a>          | <a href="#">17160</a>     | mannosidase 2, alpha B2        | <a href="#">Man2b2</a>             | 0.901 | -1.654 | 0.140815  | 0.379623 |
| 15966 | 10595140 |                                    |                           |                                |                                    | 0.9   | -1.665 | 0.13867   | 0.376676 |
| 15967 | 10449034 | <a href="#">BC096050</a>           | <a href="#">214917</a>    | cDNA sequence BC008155         | <a href="#">BC008155</a>           | 0.9   | -1.817 | 0.110859  | 0.329583 |
| 15968 | 10568512 | <a href="#">NM_027037</a>          | <a href="#">69318</a>     | RIKEN cDNA 1700007K09 gene     | <a href="#">1700007K09Rik</a>      | 0.9   | -0.816 | 0.440855  | 0.699832 |
| 15969 | 10376596 | <a href="#">BC044901</a>           | <a href="#">66771</a>     | RIKEN cDNA 4933439F18 gene     | <a href="#">4933439F18Rik</a>      | 0.9   | -1.657 | 0.140306  | 0.378815 |
| 15970 | 10440731 | <a href="#">NM_001113406</a>       | <a href="#">16693</a>     | keratin associated protein 11- | <a href="#">Krtap11-1</a>          | 0.9   | -1.231 | 0.257111  | 0.531457 |
| 15971 | 10353674 | <a href="#">NM_025520</a>          | <a href="#">66373</a>     | LSM5 homolog, U6 small nuclear | <a href="#">Lsm5</a>               | 0.9   | -1.96  | 0.0895568 | 0.288877 |
| 15972 | 10492755 | <a href="#">NM_001111048</a>       | <a href="#">14161</a>     | fibrinogen, alpha polypeptide  | <a href="#">Fga</a>                | 0.9   | -1.738 | 0.124562  | 0.35351  |
| 15973 | 10530215 | <a href="#">BC009097</a>           | <a href="#">68552</a>     | RIKEN cDNA 1110003E01 gene     | <a href="#">1110003E01Rik</a>      | 0.9   | -2.353 | 0.0498258 | 0.200593 |
| 15974 | 10581473 | <a href="#">NM_001007567</a>       | <a href="#">66432</a>     | solute carrier family 7, membe | <a href="#">Slc7a6os</a>           | 0.9   | -2.403 | 0.046209  | 0.190903 |
| 15975 | 10535938 | <a href="#">NM_133898</a>          | <a href="#">100637</a>    | NEDD4 binding protein 2-like 1 | <a href="#">N4bp21l</a>            | 0.9   | -1.063 | 0.322237  | 0.598978 |
| 15976 | 10443117 | <a href="#">ENSMUST00000025033</a> | <a href="#">75393</a>     | RIKEN cDNA 0610031G08 gene     | <a href="#">0610031G08Rik</a>      | 0.9   | -1.571 | 0.158997  | 0.406117 |
| 15977 | 10360185 |                                    |                           |                                |                                    | 0.9   | -1.218 | 0.261726  | 0.536181 |
| 15978 | 10541288 | <a href="#">ENSMUST00000064287</a> | <a href="#">791394</a>    | predicted gene, ENSMUSG0000005 | <a href="#">ENSMUSG00000052437</a> | 0.9   | -1.146 | 0.288393  | 0.564348 |
| 15979 | 10464858 | <a href="#">NM_001033128</a>       | <a href="#">52028</a>     | Bardet-Biedl syndrome 1 homolo | <a href="#">Bbs1</a>               | 0.9   | -2.125 | 0.0700342 | 0.247958 |
| 15980 | 10388392 | <a href="#">NM_144491</a>          | <a href="#">116905</a>    | DPH1 homolog (S. cerevisiae)   | <a href="#">Dph1</a>               | 0.9   | -1.982 | 0.0867488 | 0.283113 |
| 15981 | 10517199 | <a href="#">NM_177866</a>          | <a href="#">329954</a>    | channel, sperm associated 4    | <a href="#">Catsper4</a>           | 0.9   | -1.385 | 0.207495  | 0.471907 |
| 15982 | 10573342 |                                    |                           |                                |                                    | 0.9   | -1.012 | 0.344105  | 0.618424 |
| 15983 | 10567171 | <a href="#">BC085269</a>           | <a href="#">68052</a>     | ribosomal protein S13          | <a href="#">Rps13</a>              | 0.9   | -0.572 | 0.58463   | 0.802272 |
| 15984 | 10404113 | <a href="#">NM_009198</a>          | <a href="#">20504</a>     | solute carrier family 17 (sodi | <a href="#">Slc17a1</a>            | 0.9   | -0.994 | 0.352449  | 0.625445 |
| 15985 | 10351507 | <a href="#">ENSMUST00000097468</a> | <a href="#">100038407</a> | predicted gene, ENSMUSG0000007 | <a href="#">ENSMUSG00000073493</a> | 0.9   | -0.892 | 0.400947  | 0.666612 |
| 15986 | 10527559 | <a href="#">NM_009087</a>          | <a href="#">20018</a>     | RNA polymerase 1-3             | <a href="#">Rpo1-3</a>             | 0.9   | -2.949 | 0.0207228 | 0.112646 |
| 15987 | 10567211 | <a href="#">XR_034261</a>          | <a href="#">668485</a>    | similar to ribosomal protein L | <a href="#">LOC668485</a>          | 0.9   | -1.881 | 0.100843  | 0.310827 |
| 15988 | 10543544 | <a href="#">NM_138682</a>          | <a href="#">192198</a>    | leucine rich repeat containing | <a href="#">Lrrc4</a>              | 0.9   | -1.745 | 0.123204  | 0.351285 |
| 15989 | 10507983 | <a href="#">NM_177671</a>          | <a href="#">230735</a>    | Eph receptor A10               | <a href="#">Epha10</a>             | 0.9   | -0.72  | 0.49447   | 0.7396   |
| 15990 | 10359303 | <a href="#">ENSMUST00000028061</a> | <a href="#">75255</a>     | RIKEN cDNA 4930562F07 gene     | <a href="#">4930562F07Rik</a>      | 0.9   | -0.699 | 0.506455  | 0.748338 |
| 15991 | 10526559 | <a href="#">NM_009599</a>          | <a href="#">11423</a>     | acetylcholinesterase           | <a href="#">Ache</a>               | 0.9   | -1.54  | 0.166233  | 0.41711  |
| 15992 | 10465980 | <a href="#">NM_025333</a>          | <a href="#">66072</a>     | RIKEN cDNA 0610038F07 gene     | <a href="#">0610038F07Rik</a>      | 0.9   | -1.548 | 0.164405  | 0.414225 |
| 15993 | 10364601 | <a href="#">NM_013850</a>          | <a href="#">27403</a>     | ATP-binding cassette, sub-fami | <a href="#">Abca7</a>              | 0.9   | -1.156 | 0.284399  | 0.559618 |
| 15994 | 10355113 |                                    |                           |                                |                                    | 0.9   | -0.707 | 0.501902  | 0.744769 |
| 15995 | 10553261 | <a href="#">NM_008421</a>          | <a href="#">16502</a>     | potassium voltage gated channe | <a href="#">Kcnc1</a>              | 0.9   | -0.956 | 0.369935  | 0.640508 |
| 15996 | 10372208 | <a href="#">NM_198636</a>          | <a href="#">380660</a>    | acyl-CoA synthetase short-chai | <a href="#">Acss3</a>              | 0.9   | -1.05  | 0.327802  | 0.604012 |
| 15997 | 10515979 |                                    |                           |                                |                                    | 0.9   | -0.396 | 0.703586  | 0.869978 |
| 15998 | 10478544 | <a href="#">NM_001012704</a>       | <a href="#">408190</a>    | WAP four-disulfide core domain | <a href="#">Wfdc13</a>             | 0.9   | -0.766 | 0.467867  | 0.720457 |
| 15999 | 10397264 | <a href="#">BC103771</a>           | <a href="#">432677</a>    | RIKEN cDNA 7420416P09 gene     | <a href="#">7420416P09Rik</a>      | 0.9   | -1.143 | 0.289451  | 0.565477 |
| 16000 | 10372745 | <a href="#">NM_001014390</a>       | <a href="#">69181</a>     | dual-specificity tyrosine-(Y)- | <a href="#">Dyrk2</a>              | 0.9   | -2.531 | 0.0382534 | 0.168964 |
| 16001 | 10467802 | <a href="#">NM_019424</a>          | <a href="#">192236</a>    | Hermansky-Pudlak syndrome 1 ho | <a href="#">Hps1</a>               | 0.9   | -2.113 | 0.0713217 | 0.250884 |
| 16002 | 10386230 | <a href="#">AB030190</a>           | <a href="#">108660</a>    | ring finger protein 187        | <a href="#">Rnf187</a>             | 0.9   | -2.869 | 0.0232691 | 0.121189 |
| 16003 | 10409276 |                                    |                           |                                |                                    | 0.9   | -0.099 | 0.923649  | 0.969694 |

|       |          |                                    |                        |                                     |                                    |       |        |           |          |
|-------|----------|------------------------------------|------------------------|-------------------------------------|------------------------------------|-------|--------|-----------|----------|
| 16004 | 10378078 | <a href="#">NM_001099688</a>       | <a href="#">628100</a> | F-box protein 39                    | <a href="#">Fbxo39</a>             | 0.9   | -0.822 | 0.437417  | 0.696704 |
| 16005 | 10558872 | <a href="#">NM_027797</a>          | <a href="#">71448</a>  | transmembrane protein 80            | <a href="#">Tmem80</a>             | 0.9   | -1.969 | 0.0884562 | 0.28668  |
| 16006 | 10364518 | <a href="#">NM_001077363</a>       | <a href="#">19205</a>  | polypyrimidine tract binding p      | <a href="#">Ptbp1</a>              | 0.9   | -2.617 | 0.0336752 | 0.154849 |
| 16007 | 10439080 |                                    |                        |                                     |                                    | 0.9   | -1.127 | 0.295899  | 0.572322 |
| 16008 | 10428736 | <a href="#">NM_024207</a>          | <a href="#">67819</a>  | Der1-like domain family, membe      | <a href="#">Der1l</a>              | 0.9   | -1.883 | 0.100465  | 0.31011  |
| 16009 | 10431946 | <a href="#">ENSMUST00000058494</a> | <a href="#">76076</a>  | RIKEN cDNA 5830453K13 gene          | <a href="#">5830453K13Rik</a>      | 0.9   | -0.796 | 0.451666  | 0.708669 |
| 16010 | 10429657 | <a href="#">NM_029663</a>          | <a href="#">66656</a>  | eukaryotic translation elongat      | <a href="#">Eef1d</a>              | 0.9   | -2.503 | 0.0398697 | 0.173611 |
| 16011 | 10363786 | <a href="#">NM_146005</a>          | <a href="#">11735</a>  | ankyrin 3, epithelial               | <a href="#">Ank3</a>               | 0.9   | -1.137 | 0.292071  | 0.568181 |
| 16012 | 10416588 | <a href="#">BC019143</a>           | <a href="#">219189</a> | RIKEN cDNA 1300010F03 gene          | <a href="#">1300010F03Rik</a>      | 0.9   | -1.779 | 0.117136  | 0.3411   |
| 16013 | 10441797 | <a href="#">NM_013686</a>          | <a href="#">21454</a>  | t-complex protein 1                 | <a href="#">Tcp1</a>               | 0.9   | -2.393 | 0.0469041 | 0.192492 |
| 16014 | 10420114 | <a href="#">NM_019984</a>          | <a href="#">21816</a>  | transglutaminase 1, K polypept      | <a href="#">Tgm1</a>               | 0.9   | -0.974 | 0.361366  | 0.633168 |
| 16015 | 10563149 | <a href="#">BC050196</a>           | <a href="#">384619</a> | cDNA sequence BC050196              | <a href="#">BC050196</a>           | 0.9   | -1.085 | 0.312703  | 0.589181 |
| 16016 | 10388227 | <a href="#">NM_001024926</a>       | <a href="#">192986</a> | cytochrome b5 domain containin      | <a href="#">Cyb5d2</a>             | 0.9   | -1.42  | 0.197317  | 0.457905 |
| 16017 | 10354472 | <a href="#">NM_001081081</a>       | <a href="#">14660</a>  | glutaminase                         | <a href="#">Gls</a>                | 0.9   | -1.507 | 0.174182  | 0.427153 |
| 16018 | 10599853 | <a href="#">NM_001018087</a>       | <a href="#">434784</a> | leucine zipper, down-regulated      | <a href="#">Ldoc1</a>              | 0.9   | -0.629 | 0.548622  | 0.779103 |
| 16019 | 10470329 | <a href="#">NM_198628</a>          | <a href="#">279029</a> | gene model 711, (NCBI)              | <a href="#">Gm711</a>              | 0.9   | -1.332 | 0.223541  | 0.493531 |
| 16020 | 10352781 | <a href="#">BC103778</a>           | <a href="#">74023</a>  | RIKEN cDNA 3322402L07 gene          | <a href="#">3322402L07Rik</a>      | 0.9   | -1.482 | 0.180595  | 0.436401 |
| 16021 | 10493377 |                                    |                        |                                     |                                    | 0.9   | -0.768 | 0.466625  | 0.719708 |
| 16022 | 10366401 |                                    |                        |                                     |                                    | 0.899 | -0.987 | 0.35546   | 0.628098 |
| 16023 | 10380189 | <a href="#">NM_001039684</a>       | <a href="#">380718</a> | Meckel syndrome, type 1             | <a href="#">Mks1</a>               | 0.899 | -1.823 | 0.109756  | 0.327457 |
| 16024 | 10527043 | <a href="#">NM_173405</a>          | <a href="#">231842</a> | archaealysin family metallopept     | <a href="#">Amz1</a>               | 0.899 | -1.315 | 0.228776  | 0.49987  |
| 16025 | 10433963 | <a href="#">NM_026940</a>          | <a href="#">69101</a>  | YdjC homolog (bacterial)            | <a href="#">YdjC</a>               | 0.899 | -1.849 | 0.10564   | 0.320213 |
| 16026 | 10481585 | <a href="#">BC021748</a>           | <a href="#">72931</a>  | RIKEN cDNA 2900010J23 gene          | <a href="#">2900010J23Rik</a>      | 0.899 | -1.499 | 0.176184  | 0.429929 |
| 16027 | 10466266 | <a href="#">NM_146936</a>          | <a href="#">258938</a> | olfactory receptor 1417             | <a href="#">Olfr1417</a>           | 0.899 | -1.131 | 0.294317  | 0.570607 |
| 16028 | 10471842 |                                    |                        |                                     |                                    | 0.899 | -1.063 | 0.321939  | 0.598721 |
| 16029 | 10563094 | <a href="#">BC003786</a>           | <a href="#">14132</a>  | Fc receptor, IgG, alpha chain       | <a href="#">Fcgrt</a>              | 0.899 | -2.009 | 0.0832422 | 0.276393 |
| 16030 | 10442968 | <a href="#">NM_001081069</a>       | <a href="#">50782</a>  | regulator of G-protein signali      | <a href="#">Rgs11</a>              | 0.899 | -1.314 | 0.229194  | 0.500215 |
| 16031 | 10520288 | <a href="#">NM_144908</a>          | <a href="#">231050</a> | UDP-N-acetyl-alpha-D-galactosa      | <a href="#">Galnt11</a>            | 0.899 | -1.843 | 0.106563  | 0.321974 |
| 16032 | 10494655 | <a href="#">NM_172863</a>          | <a href="#">242109</a> | zinc finger protein 697             | <a href="#">Zfp697</a>             | 0.899 | -1.023 | 0.339192  | 0.614614 |
| 16033 | 10416640 | <a href="#">NM_145960</a>          | <a href="#">211253</a> | mitochondrial translational re      | <a href="#">Mtrf1</a>              | 0.899 | -1.849 | 0.105634  | 0.320213 |
| 16034 | 10484735 | <a href="#">XM_621555</a>          | <a href="#">546770</a> | olfactory receptor 1175             | <a href="#">Olfr1175</a>           | 0.899 | -0.808 | 0.445084  | 0.703541 |
| 16035 | 10411107 | <a href="#">ENSMUST00000062122</a> | <a href="#">76469</a>  | cardiomyopathy associated 5         | <a href="#">Cmya5</a>              | 0.899 | -1.718 | 0.128198  | 0.359071 |
| 16036 | 10346695 | <a href="#">NM_173444</a>          | <a href="#">269198</a> | neurobeachin like 1                 | <a href="#">Nbeal1</a>             | 0.899 | -1.281 | 0.239921  | 0.512931 |
| 16037 | 10400581 | <a href="#">NM_013902</a>          | <a href="#">30795</a>  | FK506 binding protein 3             | <a href="#">Fkbp3</a>              | 0.899 | -2.377 | 0.0480966 | 0.195794 |
| 16038 | 10569923 | <a href="#">NM_028175</a>          | <a href="#">72267</a>  | leucine rich repeat containing      | <a href="#">Lrrc8e</a>             | 0.899 | -0.922 | 0.386169  | 0.655109 |
| 16039 | 10537805 | <a href="#">NM_146988</a>          | <a href="#">258990</a> | olfactory receptor 447              | <a href="#">Olfr447</a>            | 0.899 | -1.533 | 0.167793  | 0.419086 |
| 16040 | 10583773 | <a href="#">NM_144935</a>          | <a href="#">235044</a> | cDNA sequence BC018242              | <a href="#">BC018242</a>           | 0.899 | -1.393 | 0.205114  | 0.468705 |
| 16041 | 10367843 | <a href="#">NM_011682</a>          | <a href="#">22288</a>  | utrophin                            | <a href="#">Utm</a>                | 0.899 | -2.339 | 0.0508572 | 0.203346 |
| 16042 | 10418096 | <a href="#">BC021314</a>           | <a href="#">71228</a>  | discs, large homolog 5 (Drosop      | <a href="#">Dlg5</a>               | 0.899 | -2.286 | 0.0550516 | 0.21409  |
| 16043 | 10591735 | <a href="#">NM_170777</a>          | <a href="#">66126</a>  | elongation factor 1 homolog (E      | <a href="#">Elof1</a>              | 0.899 | -1.308 | 0.231123  | 0.501886 |
| 16044 | 10585284 | <a href="#">XR_034458</a>          | <a href="#">668070</a> | similar to ribosomal protein L      | <a href="#">LOC668070</a>          | 0.899 | -1.543 | 0.165392  | 0.415485 |
| 16045 | 10464594 | <a href="#">BC034269</a>           | <a href="#">225884</a> | cDNA sequence BC021614              | <a href="#">BC021614</a>           | 0.899 | -0.748 | 0.477894  | 0.728494 |
| 16046 | 10604234 | <a href="#">XM_976867</a>          | <a href="#">636756</a> | predicted gene, EG636756            | <a href="#">EG636756</a>           | 0.899 | -1.125 | 0.29666   | 0.573257 |
| 16047 | 10486061 | <a href="#">NM_011246</a>          | <a href="#">19419</a>  | RAS guanyl releasing protein 1      | <a href="#">Rasgrp1</a>            | 0.899 | -1.193 | 0.270492  | 0.545253 |
| 16048 | 10419715 | <a href="#">NM_146271</a>          | <a href="#">258268</a> | olfactory receptor 1511             | <a href="#">Olfr1511</a>           | 0.899 | -0.796 | 0.45127   | 0.708496 |
| 16049 | 10412663 | <a href="#">XR_033177</a>          | <a href="#">667030</a> | similar to hCG28692                 | <a href="#">LOC667030</a>          | 0.899 | -1.37  | 0.211748  | 0.477389 |
| 16050 | 10561842 | <a href="#">NM_009795</a>          | <a href="#">12336</a>  | calpain, small subunit 1            | <a href="#">Capns1</a>             | 0.899 | -1.846 | 0.106211  | 0.321554 |
| 16051 | 10362811 | <a href="#">NM_001013370</a>       | <a href="#">140742</a> | sestrin 1                           | <a href="#">Sesn1</a>              | 0.899 | -1.393 | 0.205194  | 0.468786 |
| 16052 | 10458607 | <a href="#">NM_134137</a>          | <a href="#">107045</a> | leucyl-tRNA synthetase              | <a href="#">Lars</a>               | 0.899 | -1.907 | 0.0970017 | 0.303313 |
| 16053 | 10473190 | <a href="#">NM_024181</a>          | <a href="#">66861</a>  | DnaJ (Hsp40) homolog, subfamil      | <a href="#">Dnajc10</a>            | 0.899 | -1.616 | 0.148951  | 0.391187 |
| 16054 | 10387170 | <a href="#">NM_008744</a>          | <a href="#">18208</a>  | netrin 1                            | <a href="#">Ntn1</a>               | 0.899 | -1.59  | 0.154545  | 0.399718 |
| 16055 | 10510624 | <a href="#">NM_001033352</a>       | <a href="#">242785</a> | kelch-like 21 (Drosophila)          | <a href="#">Klh21</a>              | 0.899 | -1.793 | 0.114745  | 0.336905 |
| 16056 | 10376425 | <a href="#">ENSMUST00000093768</a> | <a href="#">237769</a> | predicted gene, OTTMUSG0000000 gene | <a href="#">OTTMUSG00000005767</a> | 0.899 | -1.238 | 0.254391  | 0.528633 |
| 16057 | 10457382 | <a href="#">NM_153086</a>          | <a href="#">225152</a> | gap junction protein, delta 4       | <a href="#">Gjd4</a>               | 0.899 | -0.903 | 0.395686  | 0.663394 |
| 16058 | 10585940 | <a href="#">ENSMUST00000086982</a> | <a href="#">71121</a>  | RIKEN cDNA 4933407118 gene          | <a href="#">4933407118Rik</a>      | 0.899 | -0.721 | 0.493755  | 0.739216 |

|       |          |                                    |                        |                                |                               |       |        |           |          |
|-------|----------|------------------------------------|------------------------|--------------------------------|-------------------------------|-------|--------|-----------|----------|
| 16059 | 10429666 | <a href="#">NM_025412</a>          | <a href="#">66194</a>  | pyrroline-5-carboxylate reduct | <a href="#">Pycl1</a>         | 0.899 | -2.122 | 0.0703701 | 0.248523 |
| 16060 | 10448257 | <a href="#">ENSMUST00000088673</a> | <a href="#">381070</a> | predicted gene, EG381070       | <a href="#">EG381070</a>      | 0.899 | -1.09  | 0.310707  | 0.587208 |
| 16061 | 10395317 | <a href="#">NM_033522</a>          | <a href="#">114712</a> | Fer3-like (Drosophila)         | <a href="#">Ferd3l</a>        | 0.899 | -0.998 | 0.35071   | 0.624059 |
| 16062 | 10390907 | <a href="#">NM_001085526</a>       | <a href="#">435273</a> | novel protein similar to kerat | <a href="#">RP23-272C1.7</a>  | 0.899 | -0.732 | 0.487278  | 0.734951 |
| 16063 | 10450533 | <a href="#">NM_175137</a>          | <a href="#">68915</a>  | valyl-tRNA synthetase 2, mitoc | <a href="#">Vars2</a>         | 0.899 | -1.995 | 0.0850204 | 0.280082 |
| 16064 | 10529454 | <a href="#">ENSMUST00000069741</a> | <a href="#">442795</a> | RIKEN cDNA E130018O15 gene     | <a href="#">E130018O15Rik</a> | 0.899 | -1.106 | 0.304408  | 0.580956 |
| 16065 | 10435457 | <a href="#">NM_030253</a>          | <a href="#">80285</a>  | poly (ADP-ribose) polymerase f | <a href="#">Parp9</a>         | 0.899 | -1.723 | 0.127313  | 0.357621 |
| 16066 | 10499483 | <a href="#">NM_134469</a>          | <a href="#">110196</a> | farnesyl diphosphate synthetas | <a href="#">Fdps</a>          | 0.899 | -2.048 | 0.0786303 | 0.266888 |
| 16067 | 10399591 | <a href="#">AK086127</a>           | <a href="#">382686</a> | RIKEN cDNA 3110053B16 gene     | <a href="#">3110053B16Rik</a> | 0.898 | -0.883 | 0.405881  | 0.670443 |
| 16068 | 10571248 |                                    |                        |                                |                               | 0.898 | -1.455 | 0.187749  | 0.446159 |
| 16069 | 10461878 | <a href="#">BC094224</a>           | <a href="#">353211</a> | RIKEN cDNA A230083H22 gene     | <a href="#">A230083H22Rik</a> | 0.898 | -1.329 | 0.224368  | 0.494324 |
| 16070 | 10436428 | <a href="#">NM_025910</a>          | <a href="#">67014</a>  | myc induced nuclear antigen    | <a href="#">Mina</a>          | 0.898 | -1.476 | 0.182139  | 0.438626 |
| 16071 | 10471247 | <a href="#">NM_145144</a>          | <a href="#">108897</a> | RIKEN cDNA 2810003C17 gene     | <a href="#">2810003C17Rik</a> | 0.898 | -3.066 | 0.0175229 | 0.100079 |
| 16072 | 10415132 | <a href="#">NM_026066</a>          | <a href="#">67272</a>  | CKLF-like MARVEL transmembrane | <a href="#">Cmtm5</a>         | 0.898 | -0.583 | 0.577522  | 0.797771 |
| 16073 | 10489246 | <a href="#">NM_010658</a>          | <a href="#">16658</a>  | v-maf musculoaponeurotic fibro | <a href="#">Mafb</a>          | 0.898 | -1.365 | 0.213357  | 0.479304 |
| 16074 | 10378427 | <a href="#">NM_146706</a>          | <a href="#">258701</a> | olfactory receptor 401         | <a href="#">Olfr401</a>       | 0.898 | -0.986 | 0.355959  | 0.628456 |
| 16075 | 10399820 | <a href="#">NM_001110239</a>       | <a href="#">11431</a>  | acid phosphatase 1, soluble    | <a href="#">Acp1</a>          | 0.898 | -1.162 | 0.282185  | 0.557189 |
| 16076 | 10362158 | <a href="#">NM_001010827</a>       | <a href="#">209517</a> | trace amine-associated recepto | <a href="#">Taar7b</a>        | 0.898 | -0.343 | 0.741086  | 0.889595 |
| 16077 | 10598034 |                                    |                        |                                |                               | 0.898 | -2.292 | 0.0545927 | 0.21288  |
| 16078 | 10493662 | <a href="#">ENSMUST00000029548</a> | <a href="#">77595</a>  | nucleoporin 210-like           | <a href="#">Nup210l</a>       | 0.898 | -0.88  | 0.407437  | 0.671862 |
| 16079 | 10568311 | <a href="#">NM_146259</a>          | <a href="#">244219</a> | zinc finger protein 668        | <a href="#">Zfp668</a>        | 0.898 | -2.446 | 0.0433886 | 0.183115 |
| 16080 | 10452138 |                                    |                        |                                |                               | 0.898 | -1.439 | 0.192088  | 0.451438 |
| 16081 | 10548573 | <a href="#">NM_172891</a>          | <a href="#">243659</a> | serine/threonine/tyrosine kina | <a href="#">Styk1</a>         | 0.898 | -1.428 | 0.195221  | 0.455452 |
| 16082 | 10552398 | <a href="#">NM_177693</a>          | <a href="#">233187</a> | lens intrinsic membrane protei | <a href="#">Lim2</a>          | 0.898 | -1.487 | 0.179363  | 0.434671 |
| 16083 | 10398635 | <a href="#">NM_033603</a>          | <a href="#">93835</a>  | amniotless                     | <a href="#">Amn</a>           | 0.898 | -1.881 | 0.100841  | 0.310827 |
| 16084 | 10362904 | <a href="#">NM_130892</a>          | <a href="#">170728</a> | reticulon 4 interacting protei | <a href="#">Rtn4ipl</a>       | 0.898 | -2.433 | 0.0442461 | 0.185686 |
| 16085 | 10359201 | <a href="#">NM_023884</a>          | <a href="#">78255</a>  | Ral GEF with PH domain and SH3 | <a href="#">Ralgps2</a>       | 0.898 | -1.997 | 0.0848461 | 0.279698 |
| 16086 | 10468949 | <a href="#">NM_146114</a>          | <a href="#">227525</a> | DNA cross-link repair 1C, PSO2 | <a href="#">Dclre1c</a>       | 0.898 | -2.206 | 0.0620967 | 0.230346 |
| 16087 | 10375331 | <a href="#">NM_008352</a>          | <a href="#">16160</a>  | interleukin 12b                | <a href="#">Il12b</a>         | 0.898 | -1.252 | 0.249692  | 0.52381  |
| 16088 | 10492846 | <a href="#">NM_144896</a>          | <a href="#">229487</a> | PET112-like (yeast)            | <a href="#">Pet112l</a>       | 0.898 | -1.58  | 0.15682   | 0.403187 |
| 16089 | 10512470 | <a href="#">NM_001110320</a>       | <a href="#">12517</a>  | CD72 antigen                   | <a href="#">Cd72</a>          | 0.898 | -1.524 | 0.170167  | 0.421869 |
| 16090 | 10548547 | <a href="#">AK136154</a>           | <a href="#">625558</a> | predicted gene, EG625558       | <a href="#">EG625558</a>      | 0.898 | -0.69  | 0.511631  | 0.752446 |
| 16091 | 10367626 | <a href="#">NM_024261</a>          | <a href="#">73419</a>  | RIKEN cDNA 1700052N19 gene     | <a href="#">1700052N19Rik</a> | 0.898 | -1.719 | 0.127954  | 0.358673 |
| 16092 | 10463836 | <a href="#">NM_010362</a>          | <a href="#">14873</a>  | glutathione S-transferase omeg | <a href="#">Gsto1</a>         | 0.898 | -2.362 | 0.0491526 | 0.19896  |
| 16093 | 10578448 | <a href="#">NM_133969</a>          | <a href="#">102294</a> | cytochrome P450, family 4, sub | <a href="#">Cyp4v3</a>        | 0.898 | -1.906 | 0.0970499 | 0.303419 |
| 16094 | 10547820 | <a href="#">NM_013588</a>          | <a href="#">16977</a>  | leucine rich repeat containing | <a href="#">Lrrc23</a>        | 0.898 | -1.405 | 0.201561  | 0.464097 |
| 16095 | 10442603 | <a href="#">NM_001012402</a>       | <a href="#">328779</a> | heparan sulfate (glucosamine)  | <a href="#">Hs3st6</a>        | 0.898 | -1.405 | 0.201701  | 0.464266 |
| 16096 | 10429424 |                                    |                        |                                |                               | 0.898 | -0.612 | 0.559183  | 0.786667 |
| 16097 | 10521467 | <a href="#">NM_025725</a>          | <a href="#">66717</a>  | coiled-coil domain containing  | <a href="#">Cede96</a>        | 0.898 | -0.679 | 0.518311  | 0.756954 |
| 16098 | 10440713 | <a href="#">NM_130856</a>          | <a href="#">68484</a>  | keratin associated protein 16- | <a href="#">Krtap16-8</a>     | 0.898 | -0.923 | 0.385807  | 0.654758 |
| 16099 | 10410709 | <a href="#">NM_178916</a>          | <a href="#">218341</a> | Rieske (Fe-S) domain containin | <a href="#">Rfcsd</a>         | 0.898 | -1.095 | 0.308567  | 0.585197 |
| 16100 | 10592248 | <a href="#">XR_033620</a>          | <a href="#">627681</a> | similar to nucleolar protein 5 | <a href="#">LOC627681</a>     | 0.898 | -0.627 | 0.549934  | 0.780181 |
| 16101 | 10542872 | <a href="#">NR_003634</a>          | <a href="#">66184</a>  | ribosomal protein S4, Y-linked | <a href="#">Rps4y2</a>        | 0.898 | -1.969 | 0.0884431 | 0.28668  |
| 16102 | 10484762 | <a href="#">NM_001005227</a>       | <a href="#">257887</a> | olfactory receptor 1200        | <a href="#">Olfr1200</a>      | 0.898 | -0.695 | 0.509103  | 0.750516 |
| 16103 | 10576054 | <a href="#">NM_008024</a>          | <a href="#">14241</a>  | forkhead box L1                | <a href="#">Foxl1</a>         | 0.898 | -1.933 | 0.0932208 | 0.295866 |
| 16104 | 10491229 |                                    |                        |                                |                               | 0.898 | -1.832 | 0.108407  | 0.325036 |
| 16105 | 10568369 | <a href="#">NM_009943</a>          | <a href="#">12862</a>  | cytochrome c oxidase, subunit  | <a href="#">Cox6a2</a>        | 0.898 | -1.517 | 0.171779  | 0.423994 |
| 16106 | 10581336 | <a href="#">NM_027469</a>          | <a href="#">70575</a>  | glucose-fructose oxidoreductas | <a href="#">Gfod2</a>         | 0.898 | -1.051 | 0.327246  | 0.603462 |
| 16107 | 10397784 | <a href="#">ENSMUST00000055270</a> | <a href="#">319760</a> | RIKEN cDNA D130020L05 gene     | <a href="#">D130020L05Rik</a> | 0.898 | -1.755 | 0.121466  | 0.347955 |
| 16108 | 10421873 |                                    |                        |                                |                               | 0.898 | -1.044 | 0.330214  | 0.606542 |

|       |          |                                    |                           |                                |                                    |       |        |           |          |
|-------|----------|------------------------------------|---------------------------|--------------------------------|------------------------------------|-------|--------|-----------|----------|
| 16109 | 10461268 | <a href="#">BC047099</a>           | <a href="#">66276</a>     | RIKEN cDNA 1810009A15 gene     | <a href="#">1810009A15Rik</a>      | 0.898 | -2.991 | 0.0195131 | 0.107978 |
| 16110 | 10562847 | <a href="#">NM_009473</a>          | <a href="#">22260</a>     | nuclear receptor subfamily 1,  | <a href="#">Nr1h2</a>              | 0.898 | -1.356 | 0.216025  | 0.48309  |
| 16111 | 10455446 | <a href="#">NM_030061</a>          | <a href="#">78242</a>     | serine peptidase inhibitor, Ka | <a href="#">Spink12</a>            | 0.898 | -1.945 | 0.0916321 | 0.293245 |
| 16112 | 10432180 | <a href="#">NM_009833</a>          | <a href="#">12455</a>     | cyclin T1                      | <a href="#">Cent1</a>              | 0.898 | -0.874 | 0.410491  | 0.674864 |
| 16113 | 10413993 | <a href="#">XM_985917</a>          | <a href="#">268729</a>    | gene model 626, (NCBI)         | <a href="#">Gm626</a>              | 0.898 | -0.936 | 0.379685  | 0.649466 |
| 16114 | 10501489 |                                    |                           |                                |                                    | 0.898 | -2.146 | 0.067842  | 0.243316 |
| 16115 | 10372130 | <a href="#">NM_175128</a>          | <a href="#">68281</a>     | RIKEN cDNA 4930430F08 gene     | <a href="#">4930430F08Rik</a>      | 0.898 | -1.653 | 0.141     | 0.379882 |
| 16116 | 10395257 |                                    |                           |                                |                                    | 0.898 | -1.478 | 0.181614  | 0.437813 |
| 16117 | 10596318 | <a href="#">NM_029385</a>          | <a href="#">75686</a>     | nudix (nucleoside diphosphate  | <a href="#">Nudt16</a>             | 0.898 | -2.081 | 0.0747678 | 0.258738 |
| 16118 | 10558220 | <a href="#">NM_001039534</a>       | <a href="#">214580</a>    | phosphoseryl-tRNA kinase       | <a href="#">Pstk</a>               | 0.898 | -1.762 | 0.120181  | 0.346569 |
| 16119 | 10444137 | <a href="#">NM_011306</a>          | <a href="#">20182</a>     | retinoid X receptor beta       | <a href="#">Rxb</a>                | 0.898 | -2.271 | 0.0562887 | 0.216807 |
| 16120 | 10376230 | <a href="#">NM_013716</a>          | <a href="#">27041</a>     | Ras-GTPase-activating protein  | <a href="#">G3bp1</a>              | 0.898 | -1.853 | 0.105085  | 0.319364 |
| 16121 | 10412655 | <a href="#">ENSMUST00000067738</a> | <a href="#">78393</a>     | RIKEN cDNA 2610318M16 gene     | <a href="#">2610318M16Rik</a>      | 0.898 | -1.218 | 0.261621  | 0.536103 |
| 16122 | 10495773 | <a href="#">NM_153806</a>          | <a href="#">99480</a>     | deoxynucleotidyltransferase, t | <a href="#">Dnttp2</a>             | 0.898 | -1.81  | 0.111883  | 0.331046 |
| 16123 | 10471904 | <a href="#">NM_028809</a>          | <a href="#">74192</a>     | actin related protein 2/3 comp | <a href="#">Arpc5l</a>             | 0.898 | -2.236 | 0.0593115 | 0.224264 |
| 16124 | 10406546 |                                    |                           |                                |                                    | 0.898 | -2.688 | 0.0303381 | 0.144768 |
| 16125 | 10376096 | <a href="#">NM_001033598</a>       | <a href="#">216739</a>    | acyl-CoA synthetase long-chain | <a href="#">Acsl6</a>              | 0.898 | -1.453 | 0.188191  | 0.446289 |
| 16126 | 10351968 | <a href="#">ENSMUST00000085861</a> | <a href="#">546747</a>    | olfactory receptor 220         | <a href="#">Olfr220</a>            | 0.898 | -1.485 | 0.179796  | 0.43509  |
| 16127 | 10428933 | <a href="#">NR_003523</a>          | <a href="#">67552</a>     | H2A histone family, member Y3  | <a href="#">H2afy3</a>             | 0.898 | -1.831 | 0.108457  | 0.325142 |
| 16128 | 10557353 | <a href="#">NM_001081022</a>       | <a href="#">233865</a>    | RIKEN cDNA D430042O09 gene     | <a href="#">D430042O09Rik</a>      | 0.897 | -1.573 | 0.158413  | 0.405262 |
| 16129 | 10605929 | <a href="#">NM_177746</a>          | <a href="#">245532</a>    | diacylglycerol O-acyltransfera | <a href="#">Dgat2l4</a>            | 0.897 | -1.837 | 0.107638  | 0.323419 |
| 16130 | 10369948 | <a href="#">NM_172549</a>          | <a href="#">104248</a>    | calcineurin binding protein 1  | <a href="#">Cabin1</a>             | 0.897 | -1.974 | 0.0878072 | 0.28541  |
| 16131 | 10526493 | <a href="#">NM_021611</a>          | <a href="#">59310</a>     | myosin light chain 2, precurs  | <a href="#">Mylc2pl</a>            | 0.897 | -1.708 | 0.130064  | 0.36185  |
| 16132 | 10511149 | <a href="#">NM_025570</a>          | <a href="#">66448</a>     | mitochondrial ribosomal protei | <a href="#">Mrpl20</a>             | 0.897 | -1.758 | 0.120831  | 0.347267 |
| 16133 | 10507529 | <a href="#">NM_020000</a>          | <a href="#">80509</a>     | mediator of RNA polymerase II  | <a href="#">Med8</a>               | 0.897 | -2.302 | 0.0537428 | 0.210433 |
| 16134 | 10570604 |                                    |                           |                                |                                    | 0.897 | -1.703 | 0.131082  | 0.363535 |
| 16135 | 10578251 |                                    |                           |                                |                                    | 0.897 | -1.435 | 0.193136  | 0.452493 |
| 16136 | 10348682 | <a href="#">NM_011796</a>          | <a href="#">23830</a>     | calpain 10                     | <a href="#">Capn10</a>             | 0.897 | -1.43  | 0.194702  | 0.454775 |
| 16137 | 10348670 | <a href="#">NM_181405</a>          | <a href="#">108657</a>    | arginyl aminopeptidase (aminop | <a href="#">Rnpepl1</a>            | 0.897 | -1.996 | 0.0849756 | 0.279994 |
| 16138 | 10352092 | <a href="#">NM_001012330</a>       | <a href="#">30928</a>     | zinc finger protein 238        | <a href="#">Zfp238</a>             | 0.897 | -1.81  | 0.112022  | 0.331272 |
| 16139 | 10524221 | <a href="#">NM_001033459</a>       | <a href="#">381667</a>    | gene model 1679, (NCBI)        | <a href="#">Gm1679</a>             | 0.897 | -1.311 | 0.229915  | 0.500912 |
| 16140 | 10500140 | <a href="#">NM_001085383</a>       | <a href="#">71790</a>     | annexin A9                     | <a href="#">Anxa9</a>              | 0.897 | -1.287 | 0.237709  | 0.510106 |
| 16141 | 10542401 | <a href="#">NM_178776</a>          | <a href="#">320135</a>    | cDNA sequence BC049715         | <a href="#">BC049715</a>           | 0.897 | -0.983 | 0.357656  | 0.630084 |
| 16142 | 10381798 | <a href="#">NM_010858</a>          | <a href="#">17896</a>     | myosin, light polypeptide 4    | <a href="#">My14</a>               | 0.897 | -0.925 | 0.384933  | 0.654157 |
| 16143 | 10473608 | <a href="#">NM_001011517</a>       | <a href="#">329460</a>    | olfactory receptor 1193        | <a href="#">Olfr1193</a>           | 0.897 | -0.247 | 0.811937  | 0.924032 |
| 16144 | 10528788 | <a href="#">ENSMUST00000072180</a> | <a href="#">100038373</a> | predicted gene, ENSMUSG0000005 | <a href="#">ENSMUSG00000059244</a> | 0.897 | -1.469 | 0.184058  | 0.441439 |
| 16145 | 10549748 | <a href="#">NM_025324</a>          | <a href="#">66056</a>     | zinc finger protein 524        | <a href="#">Zfp524</a>             | 0.897 | -1.305 | 0.232123  | 0.502819 |
| 16146 | 10517655 | <a href="#">NM_011110</a>          | <a href="#">18784</a>     | phospholipase A2, group V      | <a href="#">Pla2g5</a>             | 0.897 | -1.329 | 0.224244  | 0.494263 |
| 16147 | 10566666 | <a href="#">ENSMUST00000084758</a> | <a href="#">626674</a>    | olfactory receptor 471         | <a href="#">Olfr471</a>            | 0.897 | -0.789 | 0.455504  | 0.711786 |
| 16148 | 10605568 | <a href="#">AB032764</a>           | <a href="#">60600</a>     | testis specific gene A8        | <a href="#">Tsga8</a>              | 0.897 | -1.163 | 0.281883  | 0.557053 |
| 16149 | 10560294 | <a href="#">BC125404</a>           | <a href="#">101434</a>    | CEA-related cell adhesion mole | <a href="#">Ceacam15</a>           | 0.897 | -1.131 | 0.294305  | 0.570607 |
| 16150 | 10505270 | <a href="#">NM_025286</a>          | <a href="#">20530</a>     | solute carrier family 31, memb | <a href="#">Slc31a2</a>            | 0.897 | -1.952 | 0.0906749 | 0.291063 |
| 16151 | 10525916 | <a href="#">ENSMUST00000031446</a> | <a href="#">208151</a>    | transmembrane protein 132B     | <a href="#">Tmem132b</a>           | 0.897 | -1.281 | 0.239721  | 0.512764 |
| 16152 | 10447264 | <a href="#">NM_009205</a>          | <a href="#">20532</a>     | solute carrier family 3, membe | <a href="#">Slc3a1</a>             | 0.897 | -1.573 | 0.158541  | 0.40535  |
| 16153 | 10514561 | <a href="#">ENSMUST00000107065</a> | <a href="#">319865</a>    | RIKEN cDNA E130114P18 gene     | <a href="#">E130114P18Rik</a>      | 0.897 | -0.814 | 0.441644  | 0.700534 |
| 16154 | 10427991 | <a href="#">NM_001081302</a>       | <a href="#">223435</a>    | triple functional domain (PTPR | <a href="#">Trio</a>               | 0.897 | -1.229 | 0.25753   | 0.531656 |
| 16155 | 10516735 | <a href="#">NM_023476</a>          | <a href="#">94242</a>     | tubulointerstitial nephritis a | <a href="#">Tinagl</a>             | 0.897 | -1.602 | 0.151879  | 0.39568  |
| 16156 | 10390075 | <a href="#">NM_001105561</a>       | <a href="#">217122</a>    | predicted gene, OTTMUSG0000000 | <a href="#">OTTMUSG0000002043</a>  | 0.897 | -1.176 | 0.277043  | 0.552231 |
| 16157 | 10359024 | <a href="#">XM_994738</a>          | <a href="#">433367</a>    | predicted gene, EG433367       | <a href="#">EG433367</a>           | 0.897 | -1.455 | 0.18778   | 0.446159 |
| 16158 | 10470614 | <a href="#">NM_001033874</a>       | <a href="#">68870</a>     | RIKEN cDNA 1190002A17 gene     | <a href="#">1190002A17Rik</a>      | 0.897 | -1.327 | 0.224902  | 0.494934 |
| 16159 | 10605051 | <a href="#">NM_011907</a>          | <a href="#">24102</a>     | three prime repair exonuclease | <a href="#">Trex2</a>              | 0.897 | -0.723 | 0.492285  | 0.738375 |

|       |          |                                    |                           |                                |                                    |       |        |           |          |
|-------|----------|------------------------------------|---------------------------|--------------------------------|------------------------------------|-------|--------|-----------|----------|
| 16160 | 10477218 | <a href="#">NM_001083618</a>       | <a href="#">/4/11</a>     | tubulin tyrosine ligase-like 1 | <a href="#">Tll9</a>               | 0.897 | -1.565 | 0.160384  | 0.407738 |
| 16161 | 10427045 | <a href="#">BC016463</a>           | <a href="#">68118</a>     | RIKEN cDNA 9430023L20 gene     | <a href="#">9430023L20Rik</a>      | 0.897 | -2.506 | 0.0396946 | 0.173124 |
| 16162 | 10425981 | <a href="#">XM_139514</a>          | <a href="#">223745</a>    | predicted gene, EG223745       | <a href="#">EG223745</a>           | 0.897 | -1.786 | 0.116082  | 0.338824 |
| 16163 | 10574572 | <a href="#">BC027185</a>           | <a href="#">72361</a>     | RIKEN cDNA 2210023G05 gene     | <a href="#">2210023G05Rik</a>      | 0.897 | -0.888 | 0.40329   | 0.668494 |
| 16164 | 10603262 | <a href="#">BC100377</a>           | <a href="#">102991</a>    | expressed sequence AU022751    | <a href="#">AU022751</a>           | 0.897 | -1.308 | 0.230939  | 0.501641 |
| 16165 | 10488553 | <a href="#">BC119071</a>           | <a href="#">381393</a>    | RIKEN cDNA 4921509C19 gene     | <a href="#">4921509C19Rik</a>      | 0.897 | -0.557 | 0.594352  | 0.808582 |
| 16166 | 10449163 | <a href="#">NM_011822</a>          | <a href="#">14755</a>     | phosphatidylinositol glycan an | <a href="#">Pigq</a>               | 0.897 | -2.621 | 0.0334855 | 0.154358 |
| 16167 | 10607062 | <a href="#">XM_001472085</a>       | <a href="#">633596</a>    | similar to high mobility group | <a href="#">LOC633596</a>          | 0.897 | -1.273 | 0.242632  | 0.515498 |
| 16168 | 10592731 | <a href="#">ENSMUST00000098854</a> | <a href="#">100038560</a> | predicted gene, ENSMUSG0000007 | <a href="#">ENSMUSG00000074408</a> | 0.897 | -0.934 | 0.380389  | 0.65004  |
| 16169 | 10395049 | <a href="#">NM_011275</a>          | <a href="#">19819</a>     | ribonuclease H1                | <a href="#">Rnaseh1</a>            | 0.897 | -1.741 | 0.123965  | 0.352394 |
| 16170 | 10483157 |                                    |                           |                                |                                    | 0.897 | -0.711 | 0.499395  | 0.742612 |
| 16171 | 10438891 | <a href="#">NM_001033403</a>       | <a href="#">328657</a>    | gene model 1968, (NCBI)        | <a href="#">Gm1968</a>             | 0.897 | -1.378 | 0.209586  | 0.474666 |
| 16172 | 10428302 | <a href="#">NM_013692</a>          | <a href="#">21847</a>     | Kruppel-like factor 10         | <a href="#">Klf10</a>              | 0.897 | -1.657 | 0.14028   | 0.378815 |
| 16173 | 10438094 |                                    |                           |                                |                                    | 0.897 | -0.552 | 0.597807  | 0.81086  |
| 16174 | 10355717 | <a href="#">NM_194333</a>          | <a href="#">22626</a>     | solute carrier family 23 (nucl | <a href="#">Slc23a3</a>            | 0.897 | -1.05  | 0.327783  | 0.604012 |
| 16175 | 10580854 | <a href="#">BC016201</a>           | <a href="#">234586</a>    | cDNA sequence BC016201         | <a href="#">BC016201</a>           | 0.897 | -1.209 | 0.264942  | 0.540102 |
| 16176 | 10497012 | <a href="#">BC145840</a>           | <a href="#">71845</a>     | RIKEN cDNA 4922501L14 gene     | <a href="#">4922501L14Rik</a>      | 0.897 | -2.19  | 0.0635422 | 0.233902 |
| 16177 | 10436046 |                                    |                           |                                |                                    | 0.897 | -1.934 | 0.093093  | 0.295671 |
| 16178 | 10517924 | <a href="#">NM_019701</a>          | <a href="#">56365</a>     | chloride channel Kb            | <a href="#">Clenkb</a>             | 0.897 | -1.871 | 0.10226   | 0.313542 |
| 16179 | 10561388 | <a href="#">NM_025616</a>          | <a href="#">66525</a>     | translocase of inner mitochond | <a href="#">Timm50</a>             | 0.897 | -2.288 | 0.0548602 | 0.213516 |
| 16180 | 10386359 | <a href="#">NM_008193</a>          | <a href="#">14923</a>     | guanylate kinase 1             | <a href="#">Guk1</a>               | 0.896 | -2.581 | 0.0354843 | 0.160453 |
| 16181 | 10450603 |                                    |                           |                                |                                    | 0.896 | -0.91  | 0.392051  | 0.660239 |
| 16182 | 10490116 |                                    |                           |                                |                                    | 0.896 | -0.783 | 0.458341  | 0.713583 |
| 16183 | 10495270 | <a href="#">NM_146137</a>          | <a href="#">229715</a>    | adhesion molecule with Ig like | <a href="#">Amigo1</a>             | 0.896 | -1.916 | 0.0956278 | 0.300662 |
| 16184 | 10445496 | <a href="#">NM_145353</a>          | <a href="#">28064</a>     | Yip1 domain family, member 3   | <a href="#">Yipf3</a>              | 0.896 | -2.005 | 0.0837875 | 0.277377 |
| 16185 | 10506498 |                                    |                           |                                |                                    | 0.896 | -1.109 | 0.30296   | 0.579028 |
| 16186 | 10569958 | <a href="#">ENSMUST00000098949</a> | <a href="#">20300</a>     | chemokine (C-C motif) ligand 2 | <a href="#">Ccl25</a>              | 0.896 | -1.152 | 0.286037  | 0.561602 |
| 16187 | 10481845 | <a href="#">BC059907</a>           | <a href="#">72543</a>     | RIKEN cDNA 2610528K11 gene     | <a href="#">2610528K11Rik</a>      | 0.896 | -2.71  | 0.0293484 | 0.141418 |
| 16188 | 10499899 | <a href="#">NM_009264</a>          | <a href="#">20753</a>     | small proline-rich protein 1A  | <a href="#">Sprr1a</a>             | 0.896 | -0.726 | 0.490729  | 0.737369 |
| 16189 | 10428602 |                                    |                           |                                |                                    | 0.896 | -0.777 | 0.461615  | 0.716254 |
| 16190 | 10406663 | <a href="#">NM_009712</a>          | <a href="#">11881</a>     | arylsulfatase B                | <a href="#">Arse</a>               | 0.896 | -1.94  | 0.0923057 | 0.294385 |
| 16191 | 10516213 | <a href="#">NM_023423</a>          | <a href="#">68050</a>     | RIKEN cDNA 6330407G11 gene     | <a href="#">6330407G11Rik</a>      | 0.896 | -2.339 | 0.050875  | 0.203346 |
| 16192 | 10448402 | <a href="#">NM_013921</a>          | <a href="#">30943</a>     | transmembrane protease, serine | <a href="#">Tmprss8</a>            | 0.896 | -1.102 | 0.305807  | 0.582258 |
| 16193 | 10422259 | <a href="#">NM_029578</a>          | <a href="#">76355</a>     | TDP-glucose 4,6-dehydratase    | <a href="#">Tgds</a>               | 0.896 | -1.614 | 0.149284  | 0.391663 |
| 16194 | 10385043 | <a href="#">NM_008722</a>          | <a href="#">18148</a>     | nucleophosmin 1                | <a href="#">Npm1</a>               | 0.896 | -1.827 | 0.109236  | 0.326503 |
| 16195 | 10506701 | <a href="#">NM_147221</a>          | <a href="#">230587</a>    | GLIS family zinc finger 1      | <a href="#">Glis1</a>              | 0.896 | -1.442 | 0.191385  | 0.450628 |
| 16196 | 10365282 | <a href="#">ENSMUST00000076984</a> | <a href="#">70003</a>     | RIKEN cDNA 1700028I16 gene     | <a href="#">1700028I16Rik</a>      | 0.896 | -1.364 | 0.213597  | 0.479693 |
| 16197 | 10443047 | <a href="#">NM_053173</a>          | <a href="#">16580</a>     | kinesin family member C1       | <a href="#">Kifc1</a>              | 0.896 | -1.301 | 0.233251  | 0.504383 |
| 16198 | 10600588 |                                    |                           |                                |                                    | 0.896 | -1.338 | 0.221604  | 0.491101 |
| 16199 | 10389701 | <a href="#">NM_009648</a>          | <a href="#">11640</a>     | A kinase (PRKA) anchor protein | <a href="#">Akap1</a>              | 0.896 | -1.417 | 0.198079  | 0.458849 |
| 16200 | 10569927 | <a href="#">NM_001042557</a>       | <a href="#">26400</a>     | mitogen-activated protein kina | <a href="#">Map2k7</a>             | 0.896 | -2.932 | 0.0212275 | 0.114033 |
| 16201 | 10445781 | <a href="#">NM_031254</a>          | <a href="#">83433</a>     | triggering receptor expressed  | <a href="#">Trem2</a>              | 0.896 | -1.236 | 0.255111  | 0.5294   |
| 16202 | 10441811 |                                    |                           |                                |                                    | 0.896 | -0.883 | 0.4059    | 0.670443 |
| 16203 | 10462309 | <a href="#">ENSMUST00000035141</a> | <a href="#">107372</a>    | RIKEN cDNA C030016D13 gene     | <a href="#">C030016D13Rik</a>      | 0.896 | -1.309 | 0.230704  | 0.501597 |
| 16204 | 10430255 | <a href="#">NM_001017983</a>       | <a href="#">239554</a>    | FAD-dependent oxidoreductase d | <a href="#">Foxred2</a>            | 0.896 | -1.279 | 0.240389  | 0.513465 |
| 16205 | 10419803 | <a href="#">BC029624</a>           | <a href="#">74359</a>     | RIKEN cDNA 4931414P19 gene     | <a href="#">4931414P19Rik</a>      | 0.896 | -0.793 | 0.452826  | 0.709514 |
| 16206 | 10386159 | <a href="#">NM_178761</a>          | <a href="#">319475</a>    | zinc finger protein 672        | <a href="#">Zfp672</a>             | 0.896 | -1.779 | 0.11716   | 0.341121 |
| 16207 | 10396795 | <a href="#">NM_026114</a>          | <a href="#">13665</a>     | eukaryotic translation initiat | <a href="#">Eif2s1</a>             | 0.896 | -2.724 | 0.0287367 | 0.139246 |
| 16208 | 10429446 | <a href="#">ENSMUST00000110021</a> | <a href="#">268816</a>    | gene model 628, (NCBI)         | <a href="#">Gm628</a>              | 0.896 | -0.569 | 0.586602  | 0.803706 |
| 16209 | 10394892 | <a href="#">NM_018813</a>          | <a href="#">54451</a>     | cleavage and polyadenylation s | <a href="#">Cpsf3</a>              | 0.896 | -2.581 | 0.0355135 | 0.16052  |
| 16210 | 10507773 |                                    |                           |                                |                                    | 0.896 | -2.463 | 0.0422826 | 0.179955 |
| 16211 | 10481566 | <a href="#">NM_178887</a>          | <a href="#">98970</a>     | fibrinogen C domain containing | <a href="#">Fibcd1</a>             | 0.896 | -1.977 | 0.087332  | 0.284457 |

|       |          |                                    |                        |                                |                               |       |        |           |          |
|-------|----------|------------------------------------|------------------------|--------------------------------|-------------------------------|-------|--------|-----------|----------|
| 16212 | 10583384 |                                    |                        |                                |                               | 0.896 | -1.141 | 0.290226  | 0.566365 |
| 16213 | 10420957 | <a href="#">NM_172498</a>          | <a href="#">19229</a>  | PTK2 protein tyrosine kinase 2 | <a href="#">Ptk2b</a>         | 0.896 | -1.632 | 0.145353  | 0.387047 |
| 16214 | 10595953 | <a href="#">NM_177775</a>          | <a href="#">272636</a> | DNA segment, Chr 9, ERATO Doi  | <a href="#">D9Erttd280e</a>   | 0.896 | -1.327 | 0.224933  | 0.494952 |
| 16215 | 10408531 | <a href="#">NM_146041</a>          | <a href="#">218138</a> | GDP-mannose 4, 6-dehydratase   | <a href="#">Gmds</a>          | 0.896 | -2.208 | 0.0618714 | 0.229873 |
| 16216 | 10469538 | <a href="#">ENSMUST00000028069</a> | <a href="#">74629</a>  | RIKEN cDNA 4930426L09 gene     | <a href="#">4930426L09Rik</a> | 0.896 | -0.599 | 0.567249  | 0.792635 |
| 16217 | 10466406 |                                    |                        |                                |                               | 0.896 | -1.321 | 0.226847  | 0.497571 |
| 16218 | 10535575 | <a href="#">XM_886369</a>          | <a href="#">621967</a> | predicted gene, EG621967       | <a href="#">EG621967</a>      | 0.896 | -1.162 | 0.282267  | 0.55726  |
| 16219 | 10430105 | <a href="#">NM_198119</a>          | <a href="#">378937</a> | leucine rich repeat containing | <a href="#">Lrrc24</a>        | 0.896 | -1.893 | 0.0990676 | 0.307319 |
| 16220 | 10362934 |                                    |                        |                                |                               | 0.896 | -1.939 | 0.0925099 | 0.294729 |
| 16221 | 10492640 | <a href="#">NM_178673</a>          | <a href="#">213262</a> | folliculin-like 5              | <a href="#">Fstl5</a>         | 0.896 | -1.196 | 0.269667  | 0.544449 |
| 16222 | 10458597 | <a href="#">NM_001033426</a>       | <a href="#">332309</a> | gene model 851, (NCBI)         | <a href="#">Gm851</a>         | 0.896 | -1.184 | 0.274049  | 0.548672 |
| 16223 | 10508052 | <a href="#">NM_001081097</a>       | <a href="#">14807</a>  | glutamate receptor, ionotropic | <a href="#">Grik3</a>         | 0.896 | -0.887 | 0.403486  | 0.668494 |
| 16224 | 10520301 | <a href="#">NM_198621</a>          | <a href="#">242891</a> | gene model 443, (NCBI)         | <a href="#">Gm443</a>         | 0.896 | -0.746 | 0.479366  | 0.729345 |
| 16225 | 10411945 | <a href="#">NM_029984</a>          | <a href="#">77803</a>  | RIKEN cDNA A930021C24 gene     | <a href="#">A930021C24Rik</a> | 0.896 | -1.023 | 0.339496  | 0.614887 |
| 16226 | 10517191 | <a href="#">NM_001080712</a>       | <a href="#">665186</a> | predicted gene, EG665186       | <a href="#">EG665186</a>      | 0.896 | -1.173 | 0.278073  | 0.55314  |
| 16227 | 10466963 | <a href="#">BC125582</a>           | <a href="#">240613</a> | RIKEN cDNA 9930021J03 gene     | <a href="#">9930021J03Rik</a> | 0.896 | -1.383 | 0.20795   | 0.472478 |
| 16228 | 10440425 |                                    |                        |                                |                               | 0.896 | -1.971 | 0.0880853 | 0.286007 |
| 16229 | 10412062 | <a href="#">XR_030949</a>          | <a href="#">631589</a> | similar to 60S ribosomal prote | <a href="#">LOC631589</a>     | 0.896 | -1.265 | 0.245276  | 0.518352 |
| 16230 | 10353803 | <a href="#">NM_198899</a>          | <a href="#">320011</a> | UDP-glucose ceramide glucosylt | <a href="#">Ugcgl1</a>        | 0.896 | -1.967 | 0.0886666 | 0.286953 |
| 16231 | 10467784 | <a href="#">NM_029011</a>          | <a href="#">74580</a>  | RIKEN cDNA 4833409A17 gene     | <a href="#">4833409A17Rik</a> | 0.896 | -1.947 | 0.0913432 | 0.292586 |
| 16232 | 10603249 | <a href="#">NM_010850</a>          | <a href="#">17870</a>  | myc-like oncogene, s-myc prote | <a href="#">Mycs</a>          | 0.896 | -1.577 | 0.157552  | 0.404282 |
| 16233 | 10463732 | <a href="#">NM_146100</a>          | <a href="#">226180</a> | internexin neuronal intermedia | <a href="#">Ina</a>           | 0.896 | -1.534 | 0.167536  | 0.418673 |
| 16234 | 10572613 | <a href="#">NM_053162</a>          | <a href="#">94065</a>  | mitochondrial ribosomal protei | <a href="#">Mrpl34</a>        | 0.896 | -2.154 | 0.067102  | 0.241886 |
| 16235 | 10460556 | <a href="#">NM_001024717</a>       | <a href="#">545276</a> | galactose-3-O-sulfotransferase | <a href="#">Gal3st3</a>       | 0.896 | -1.526 | 0.169669  | 0.420989 |
| 16236 | 10369301 | <a href="#">NM_016803</a>          | <a href="#">53374</a>  | carbohydrate (chondroitin 6/ke | <a href="#">Chst3</a>         | 0.895 | -0.901 | 0.396778  | 0.664039 |
| 16237 | 10442904 | <a href="#">BC010800</a>           | <a href="#">72106</a>  | RIKEN cDNA 2610003J06 gene     | <a href="#">2610003J06Rik</a> | 0.895 | -0.9   | 0.397243  | 0.664239 |
| 16238 | 10510505 |                                    |                        |                                |                               | 0.895 | -0.813 | 0.442275  | 0.700945 |
| 16239 | 10379340 |                                    |                        |                                |                               | 0.895 | -1.057 | 0.324693  | 0.601113 |
| 16240 | 10527982 | <a href="#">BC062906</a>           | <a href="#">207686</a> | RIKEN cDNA A330021E22 gene     | <a href="#">A330021E22Rik</a> | 0.895 | -1.603 | 0.151696  | 0.395641 |
| 16241 | 10391410 | <a href="#">NM_019584</a>          | <a href="#">56208</a>  | beclin 1, autophagy related    | <a href="#">Becn1</a>         | 0.895 | -2.158 | 0.0667094 | 0.241235 |
| 16242 | 10551554 | <a href="#">NM_023637</a>          | <a href="#">71984</a>  | seryl-aminoacyl-tRNA synthetas | <a href="#">Sars2</a>         | 0.895 | -1.23  | 0.257321  | 0.531588 |
| 16243 | 10470268 | <a href="#">NM_173180</a>          | <a href="#">66865</a>  | peptidase (mitochondrial proce | <a href="#">Pmpca</a>         | 0.895 | -2.132 | 0.0693509 | 0.246733 |
| 16244 | 10525657 | <a href="#">NM_026603</a>          | <a href="#">68184</a>  | density-regulated protein      | <a href="#">Denr</a>          | 0.895 | -2.895 | 0.0224134 | 0.118094 |
| 16245 | 10554445 | <a href="#">NM_145150</a>          | <a href="#">233406</a> | protein regulator of cytokines | <a href="#">Pre1</a>          | 0.895 | -2.323 | 0.0521162 | 0.206473 |
| 16246 | 10555832 | <a href="#">NM_147119</a>          | <a href="#">259123</a> | olfactory receptor 632         | <a href="#">Olfr632</a>       | 0.895 | -0.884 | 0.405004  | 0.669624 |
| 16247 | 10529118 | <a href="#">NM_010122</a>          | <a href="#">13667</a>  | eukaryotic translation initiat | <a href="#">Eif2b4</a>        | 0.895 | -1.975 | 0.0876117 | 0.284863 |
| 16248 | 10355084 | <a href="#">NM_145518</a>          | <a href="#">227197</a> | NADH dehydrogenase (ubiquinone | <a href="#">Ndufs1</a>        | 0.895 | -2.094 | 0.0733533 | 0.255698 |
| 16249 | 10508719 |                                    |                        |                                |                               | 0.895 | -1.361 | 0.214468  | 0.481188 |
| 16250 | 10484195 | <a href="#">ENSMUST00000099980</a> | <a href="#">22138</a>  | titin                          | <a href="#">Ttn</a>           | 0.895 | -1.046 | 0.329417  | 0.605827 |
| 16251 | 10509596 | <a href="#">NM_025786</a>          | <a href="#">66825</a>  | ring finger protein 186        | <a href="#">Rnf186</a>        | 0.895 | -0.975 | 0.36128   | 0.633093 |
| 16252 | 10559687 | <a href="#">NM_026158</a>          | <a href="#">67441</a>  | isochorismatase domain contain | <a href="#">Isoc2b</a>        | 0.895 | -1.856 | 0.104548  | 0.318157 |
| 16253 | 10465427 | <a href="#">NM_019924</a>          | <a href="#">56613</a>  | ribosomal protein S6 kinase, p | <a href="#">Rps6ka4</a>       | 0.895 | -1.342 | 0.220197  | 0.488992 |
| 16254 | 10433584 | <a href="#">NM_011608</a>          | <a href="#">21935</a>  | tumor necrosis factor receptor | <a href="#">Tnfrsf17</a>      | 0.895 | -1.523 | 0.170429  | 0.422073 |
| 16255 | 10401023 | <a href="#">NM_026020</a>          | <a href="#">67186</a>  | ribosomal protein, large P2    | <a href="#">Rplp2</a>         | 0.895 | -1.982 | 0.0866693 | 0.283017 |
| 16256 | 10367305 | <a href="#">NM_172790</a>          | <a href="#">237615</a> | ankyrin repeat domain 52       | <a href="#">Ankrd52</a>       | 0.895 | -1.764 | 0.119813  | 0.346027 |
| 16257 | 10562905 | <a href="#">NM_030693</a>          | <a href="#">107503</a> | activating transcription facto | <a href="#">Atf5</a>          | 0.895 | -2.02  | 0.0819132 | 0.273441 |
| 16258 | 10554281 | <a href="#">NM_145946</a>          | <a href="#">208836</a> | Fanconi anemia, complementatio | <a href="#">Fanci</a>         | 0.895 | -1.808 | 0.112321  | 0.331971 |
| 16259 | 10567520 | <a href="#">XM_355934</a>          | <a href="#">381917</a> | dynein, axonemal, heavy chain  | <a href="#">Dnahc3</a>        | 0.895 | -2.063 | 0.0768184 | 0.262781 |
| 16260 | 10607465 | <a href="#">XR_032773</a>          | <a href="#">675813</a> | similar to 40S ribosomal prote | <a href="#">LOC675813</a>     | 0.895 | -1.413 | 0.199193  | 0.460684 |
| 16261 | 10397891 | <a href="#">BC096606</a>           | <a href="#">320351</a> | RIKEN cDNA D230037D09 gene     | <a href="#">D230037D09Rik</a> | 0.895 | -1.526 | 0.16952   | 0.420889 |
| 16262 | 10431463 | <a href="#">NM_027081</a>          | <a href="#">69440</a>  | RIKEN cDNA 1700027J05 gene     | <a href="#">1700027J05Rik</a> | 0.895 | -2.231 | 0.0597404 | 0.225162 |
| 16263 | 10544644 | <a href="#">ENSMUST00000101405</a> | <a href="#">14210</a>  | hypothetical LOC14210          | <a href="#">LOC14210</a>      | 0.895 | -2.512 | 0.0393149 | 0.172    |

|       |          |                                    |                           |                                |                                    |       |        |           |          |
|-------|----------|------------------------------------|---------------------------|--------------------------------|------------------------------------|-------|--------|-----------|----------|
| 16264 | 10543460 | <a href="#">NM_177013</a>          | <a href="#">319832</a>    | RIKEN cDNA 6332401O19 gene     | <a href="#">6332401O19Rik</a>      | 0.895 | -1.176 | 0.276826  | 0.551981 |
| 16265 | 10589350 | <a href="#">NM_025858</a>          | <a href="#">66940</a>     | shisa homolog 5 (Xenopus laevi | <a href="#">Shisa5</a>             | 0.895 | -2.29  | 0.0547008 | 0.213119 |
| 16266 | 10494857 | <a href="#">NM_010937</a>          | <a href="#">18176</a>     | neuroblastoma ras oncogene     | <a href="#">Nras</a>               | 0.895 | -2.683 | 0.0305233 | 0.14545  |
| 16267 | 10393648 | <a href="#">NM_018822</a>          | <a href="#">27029</a>     | N-sulfoglucosamine sulfohydrol | <a href="#">Sgsh</a>               | 0.895 | -1.312 | 0.22988   | 0.500912 |
| 16268 | 10408156 | <a href="#">NM_134239</a>          | <a href="#">171273</a>    | vomeronal 1 receptor, H14      | <a href="#">V1rh14</a>             | 0.895 | -1.353 | 0.216974  | 0.484549 |
| 16269 | 10539337 | <a href="#">NM_020619</a>          | <a href="#">57377</a>     | glucosidase 1                  | <a href="#">Gcs1</a>               | 0.895 | -2.065 | 0.0765879 | 0.262374 |
| 16270 | 10406171 | <a href="#">NM_182839</a>          | <a href="#">72948</a>     | tubulin polymerization promoti | <a href="#">Tppp</a>               | 0.895 | -1.594 | 0.15362   | 0.398105 |
| 16271 | 10390931 |                                    |                           |                                |                                    | 0.895 | -0.406 | 0.69652   | 0.866816 |
| 16272 | 10579043 | <a href="#">NM_199364</a>          | <a href="#">211134</a>    | leucine zipper, putative tumor | <a href="#">Lzts1</a>              | 0.895 | -1.145 | 0.288961  | 0.565029 |
| 16273 | 10409592 | <a href="#">NM_010702</a>          | <a href="#">16841</a>     | leukocyte cell-derived chemota | <a href="#">Lect2</a>              | 0.895 | -0.576 | 0.582429  | 0.800864 |
| 16274 | 10443122 | <a href="#">NM_027544</a>          | <a href="#">70772</a>     | gametogenetin binding protein  | <a href="#">Ggnbp1</a>             | 0.894 | -1.51  | 0.173568  | 0.426438 |
| 16275 | 10458415 | <a href="#">ENSMUST00000097612</a> | <a href="#">100049566</a> | predicted gene, ENSMUSG0000007 | <a href="#">ENSMUSG00000073594</a> | 0.894 | -2.414 | 0.0454656 | 0.188717 |
| 16276 | 10497285 | <a href="#">NM_018864</a>          | <a href="#">55980</a>     | inositol (myo)-1(or 4)-monopho | <a href="#">Impa1</a>              | 0.894 | -2.043 | 0.079221  | 0.268035 |
| 16277 | 10436106 | <a href="#">NM_172616</a>          | <a href="#">224171</a>    | RIKEN cDNA C330027C09 gene     | <a href="#">C330027C09Rik</a>      | 0.894 | -1.511 | 0.173218  | 0.425677 |
| 16278 | 10579373 | <a href="#">BC024265</a>           | <a href="#">546071</a>    | microtubule associated serine/ | <a href="#">Mast3</a>              | 0.894 | -2.297 | 0.0541322 | 0.211449 |
| 16279 | 10528913 | <a href="#">ENSMUST00000065372</a> | <a href="#">332993</a>    | predicted gene, EG332993       | <a href="#">EG332993</a>           | 0.894 | -1.834 | 0.108082  | 0.324339 |
| 16280 | 10472300 | <a href="#">NM_021526</a>          | <a href="#">59029</a>     | proteasome (prosome, macropain | <a href="#">Psm14</a>              | 0.894 | -2.059 | 0.0773151 | 0.263972 |
| 16281 | 10460573 | <a href="#">NM_027236</a>          | <a href="#">69860</a>     | eukaryotic translation initiat | <a href="#">Eif1ad</a>             | 0.894 | -2.085 | 0.0743393 | 0.257888 |
| 16282 | 10415866 | <a href="#">NM_173393</a>          | <a href="#">219149</a>    | X Kell blood group precursor r | <a href="#">Xkr6</a>               | 0.894 | -1.139 | 0.291127  | 0.567231 |
| 16283 | 10535426 | <a href="#">NM_029048</a>          | <a href="#">74673</a>     | speedy homolog B (Drosophila)  | <a href="#">Spdyb</a>              | 0.894 | -0.839 | 0.428451  | 0.689486 |
| 16284 | 10497335 | <a href="#">BC115807</a>           | <a href="#">69126</a>     | RIKEN cDNA 1810022K09 gene     | <a href="#">1810022K09Rik</a>      | 0.894 | -1.628 | 0.14625   | 0.388006 |
| 16285 | 10595723 | <a href="#">NM_001114977</a>       | <a href="#">67958</a>     | RIKEN cDNA 2610101N10 gene     | <a href="#">2610101N10Rik</a>      | 0.894 | -2.417 | 0.0452772 | 0.18819  |
| 16286 | 10535208 | <a href="#">NM_026510</a>          | <a href="#">68017</a>     | FtsJ homolog 2 (E. coli)       | <a href="#">Ftsj2</a>              | 0.894 | -1.373 | 0.211015  | 0.476598 |
| 16287 | 10469613 | <a href="#">NM_177588</a>          | <a href="#">208967</a>    | threonine synthase-like 1 (bac | <a href="#">Thns11</a>             | 0.894 | -2.489 | 0.0407095 | 0.175879 |
| 16288 | 10574996 | <a href="#">NM_145404</a>          | <a href="#">214572</a>    | protein arginine N-methyltrans | <a href="#">Prmt7</a>              | 0.894 | -2.452 | 0.042997  | 0.182022 |
| 16289 | 10525955 | <a href="#">NM_175284</a>          | <a href="#">93897</a>     | frizzled homolog 10 (Drosophil | <a href="#">Fzd10</a>              | 0.894 | -1.351 | 0.217591  | 0.485334 |
| 16290 | 10583485 | <a href="#">NM_175687</a>          | <a href="#">319278</a>    | RIKEN cDNA A230050P20 gene     | <a href="#">A230050P20Rik</a>      | 0.894 | -1.874 | 0.101873  | 0.31281  |
| 16291 | 10577954 | <a href="#">NM_001080813</a>       | <a href="#">75767</a>     | RAB11 family interacting prote | <a href="#">Rab11fip1</a>          | 0.894 | -1.456 | 0.187479  | 0.44575  |
| 16292 | 10607694 | <a href="#">NM_025932</a>          | <a href="#">67043</a>     | synapse associated protein 1   | <a href="#">Syap1</a>              | 0.894 | -2.183 | 0.0642244 | 0.235594 |
| 16293 | 10598798 | <a href="#">NM_009483</a>          | <a href="#">22289</a>     | ubiquitously transcribed tetra | <a href="#">Utx</a>                | 0.894 | -1.099 | 0.307225  | 0.583826 |
| 16294 | 10381250 | <a href="#">NM_134024</a>          | <a href="#">103733</a>    | tubulin, gamma 1               | <a href="#">Tubg1</a>              | 0.894 | -1.659 | 0.139791  | 0.378113 |
| 16295 | 10439991 | <a href="#">NM_019678</a>          | <a href="#">21787</a>     | Trk-fused gene                 | <a href="#">Tfg</a>                | 0.894 | -3.045 | 0.0180498 | 0.102153 |
| 16296 | 10482135 | <a href="#">NM_147051</a>          | <a href="#">259053</a>    | olfactory receptor 362         | <a href="#">Olfr362</a>            | 0.894 | -1.701 | 0.131474  | 0.364159 |
| 16297 | 10586458 | <a href="#">NM_173185</a>          | <a href="#">214897</a>    | casein kinase 1, gamma 1       | <a href="#">Csnk1g1</a>            | 0.894 | -1.868 | 0.102699  | 0.314522 |
| 16298 | 10538269 | <a href="#">AK047380</a>           | <a href="#">14210</a>     | hypothetical LOC14210          | <a href="#">LOC14210</a>           | 0.894 | -0.945 | 0.374998  | 0.644998 |
| 16299 | 10456161 | <a href="#">NM_008313</a>          | <a href="#">15562</a>     | 5 hydroxytryptamine (serotonin | <a href="#">Htr4</a>               | 0.894 | -0.867 | 0.414092  | 0.677439 |
| 16300 | 10551431 | <a href="#">NM_001024726</a>       | <a href="#">545938</a>    | zinc finger proten 607         | <a href="#">Zfp607</a>             | 0.894 | -1.444 | 0.190739  | 0.449693 |
| 16301 | 10388451 | <a href="#">ENSMUST00000051512</a> | <a href="#">192652</a>    | WD repeat domain 81            | <a href="#">Wdr81</a>              | 0.894 | -1.429 | 0.194909  | 0.455025 |
| 16302 | 10508972 | <a href="#">BC080727</a>           | <a href="#">434166</a>    | similar to hypothetical protei | <a href="#">LOC434166</a>          | 0.894 | -2.032 | 0.0804885 | 0.270736 |
| 16303 | 10464171 | <a href="#">NM_001002238</a>       | <a href="#">83561</a>     | tudor domain containing 1      | <a href="#">Tdrd1</a>              | 0.894 | -1.737 | 0.124642  | 0.353512 |
| 16304 | 10540283 | <a href="#">NM_182939</a>          | <a href="#">232314</a>    | protein phosphatase 4, regulat | <a href="#">Ppp4r2</a>             | 0.894 | -1.72  | 0.127795  | 0.35851  |
| 16305 | 10432294 | <a href="#">ENSMUST00000092304</a> | <a href="#">320003</a>    | RIKEN cDNA C430014K11 gene     | <a href="#">C430014K11Rik</a>      | 0.894 | -1.235 | 0.255526  | 0.529847 |
| 16306 | 10463023 | <a href="#">NM_001011707</a>       | <a href="#">69888</a>     | cytochrome P450, family 2, sub | <a href="#">Cyp2c66</a>            | 0.894 | -0.759 | 0.472023  | 0.723892 |
| 16307 | 10377364 | <a href="#">NM_177060</a>          | <a href="#">320040</a>    | RIKEN cDNA 9930039A11 gene     | <a href="#">9930039A11Rik</a>      | 0.894 | -1.935 | 0.0929382 | 0.295413 |
| 16308 | 10443494 | <a href="#">NM_023734</a>          | <a href="#">74116</a>     | peptidase inhibitor 16         | <a href="#">Pi16</a>               | 0.894 | -0.771 | 0.465458  | 0.719103 |
| 16309 | 10419934 | <a href="#">NM_080728</a>          | <a href="#">140781</a>    | myosin, heavy polypeptide 7, c | <a href="#">Myh7</a>               | 0.894 | -1.265 | 0.245111  | 0.518211 |
| 16310 | 10376564 | <a href="#">NM_138675</a>          | <a href="#">192191</a>    | mediator of RNA polymerase II  | <a href="#">Med9</a>               | 0.894 | -2.043 | 0.0791652 | 0.267948 |
| 16311 | 10439934 |                                    |                           |                                |                                    | 0.894 | -0.724 | 0.491946  | 0.738272 |
| 16312 | 10423289 | <a href="#">XR_004732</a>          | <a href="#">624863</a>    | similar to 23 kD highly basic  | <a href="#">LOC624863</a>          | 0.894 | -1.247 | 0.251308  | 0.525436 |
| 16313 | 10453797 | <a href="#">NM_001083628</a>       | <a href="#">381157</a>    | cDNA sequence AK220484         | <a href="#">AK220484</a>           | 0.894 | -1.011 | 0.344607  | 0.61884  |

|       |          |                                    |                        |                                |                                    |       |        |           |          |
|-------|----------|------------------------------------|------------------------|--------------------------------|------------------------------------|-------|--------|-----------|----------|
| 16314 | 10398100 | <a href="#">NM_013776</a>          | <a href="#">27382</a>  | T-cell leukemia/lymphoma 1B, 5 | <a href="#">Tel1b5</a>             | 0.894 | -1.578 | 0.157356  | 0.403974 |
| 16315 | 10419015 | <a href="#">NM_130878</a>          | <a href="#">170677</a> | protocadherin 21               | <a href="#">Pcdh21</a>             | 0.894 | -1.737 | 0.124628  | 0.353512 |
| 16316 | 10395394 | <a href="#">NM_178629</a>          | <a href="#">75847</a>  | RIKEN cDNA 4930579E17 gene     | <a href="#">4930579E17Rik</a>      | 0.894 | -2.831 | 0.0245778 | 0.126012 |
| 16317 | 10363563 | <a href="#">NM_175194</a>          | <a href="#">73132</a>  | solute carrier family 25 (mito | <a href="#">Slc25a16</a>           | 0.894 | -0.656 | 0.531997  | 0.766197 |
| 16318 | 10414350 | <a href="#">NM_080843</a>          | <a href="#">67296</a>  | suppressor of cytokine signali | <a href="#">Socs4</a>              | 0.894 | -2.065 | 0.0766583 | 0.26253  |
| 16319 | 10536390 | <a href="#">NM_133236</a>          | <a href="#">170772</a> | glucocorticoid induced transcr | <a href="#">Glcei1</a>             | 0.894 | -1.401 | 0.202714  | 0.465349 |
| 16320 | 10532511 | <a href="#">BC087866</a>           | <a href="#">269683</a> | RIKEN cDNA E130006D01 gene     | <a href="#">E130006D01Rik</a>      | 0.894 | -1.078 | 0.315652  | 0.59252  |
| 16321 | 10446589 |                                    |                        |                                |                                    | 0.894 | -1.328 | 0.224813  | 0.494893 |
| 16322 | 10525718 | <a href="#">NM_144509</a>          | <a href="#">65105</a>  | ADP-ribosylation factor-like 6 | <a href="#">Arl6ip4</a>            | 0.893 | -2.613 | 0.033882  | 0.155555 |
| 16323 | 10576559 | <a href="#">NM_028908</a>          | <a href="#">74393</a>  | RIKEN cDNA 4933403G14 gene     | <a href="#">4933403G14Rik</a>      | 0.893 | -2.873 | 0.0231223 | 0.120865 |
| 16324 | 10383681 | <a href="#">ENSMUST00000065594</a> | <a href="#">791413</a> | predicted gene, OTTMUSG0000000 | <a href="#">OTTMUSG00000007639</a> | 0.893 | -1.645 | 0.142645  | 0.382804 |
| 16325 | 10499911 | <a href="#">NM_025984</a>          | <a href="#">67127</a>  | late cornified envelope 1A1    | <a href="#">Lce1a1</a>             | 0.893 | -1.645 | 0.142785  | 0.382897 |
| 16326 | 10477929 | <a href="#">NM_026124</a>          | <a href="#">67388</a>  | RIKEN cDNA 1110008F13 gene     | <a href="#">1110008F13Rik</a>      | 0.893 | -2.312 | 0.0529376 | 0.208508 |
| 16327 | 10409319 | <a href="#">NM_010076</a>          | <a href="#">13488</a>  | dopamine receptor D1A          | <a href="#">Drd1a</a>              | 0.893 | -1.135 | 0.29284   | 0.568891 |
| 16328 | 10434523 | <a href="#">NM_145632</a>          | <a href="#">245841</a> | polymerase (RNA) II (DNA direc | <a href="#">Polr2h</a>             | 0.893 | -2.752 | 0.0276178 | 0.135992 |
| 16329 | 10350948 |                                    |                        |                                |                                    | 0.893 | -1.039 | 0.332577  | 0.608621 |
| 16330 | 10376196 | <a href="#">NM_008248</a>          | <a href="#">15254</a>  | histidine triad nucleotide bin | <a href="#">Hint1</a>              | 0.893 | -2.567 | 0.0362222 | 0.162503 |
| 16331 | 10359520 |                                    |                        |                                |                                    | 0.893 | -0.878 | 0.408293  | 0.672667 |
| 16332 | 10525921 | <a href="#">XM_915709</a>          | <a href="#">208151</a> | transmembrane protein 132B     | <a href="#">Tmem132b</a>           | 0.893 | -0.837 | 0.429648  | 0.690624 |
| 16333 | 10349100 | <a href="#">XR_033564</a>          | <a href="#">626075</a> | similar to high mobility group | <a href="#">LOC626075</a>          | 0.893 | -1.676 | 0.136466  | 0.372893 |
| 16334 | 10362420 |                                    |                        |                                |                                    | 0.893 | -1.122 | 0.297863  | 0.573903 |
| 16335 | 10447128 | <a href="#">XM_916806</a>          | <a href="#">625514</a> | predicted gene, EG625514       | <a href="#">EG625514</a>           | 0.893 | -1.463 | 0.185555  | 0.44347  |
| 16336 | 10541333 | <a href="#">NM_133661</a>          | <a href="#">14411</a>  | solute carrier family 6 (neuro | <a href="#">Slc6a12</a>            | 0.893 | -0.92  | 0.387191  | 0.656149 |
| 16337 | 10544941 | <a href="#">NM_011054</a>          | <a href="#">18575</a>  | phosphodiesterase 1C           | <a href="#">Pde1c</a>              | 0.893 | -0.991 | 0.353773  | 0.6265   |
| 16338 | 10445422 | <a href="#">NM_028662</a>          | <a href="#">73836</a>  | solute carrier family 35, memb | <a href="#">Slc35b2</a>            | 0.893 | -1.559 | 0.161615  | 0.409832 |
| 16339 | 10426550 | <a href="#">NM_201359</a>          | <a href="#">380967</a> | transmembrane protein 106C     | <a href="#">Tmem106c</a>           | 0.893 | -1.605 | 0.151226  | 0.395197 |
| 16340 | 10552697 | <a href="#">NM_008437</a>          | <a href="#">16541</a>  | napsin A aspartic peptidase    | <a href="#">Napsa</a>              | 0.893 | -0.82  | 0.438379  | 0.697449 |
| 16341 | 10466248 | <a href="#">NM_001025307</a>       | <a href="#">20908</a>  | syntaxin 3                     | <a href="#">Stx3</a>               | 0.893 | -1.055 | 0.325607  | 0.601936 |
| 16342 | 10477644 | <a href="#">NM_178111</a>          | <a href="#">68728</a>  | transformation related protein | <a href="#">Trp53inp2</a>          | 0.893 | -2.271 | 0.0562935 | 0.216807 |
| 16343 | 10409294 | <a href="#">NM_009269</a>          | <a href="#">268656</a> | serine palmitoyltransferase, l | <a href="#">Sptlc1</a>             | 0.893 | -2.328 | 0.0517412 | 0.205603 |
| 16344 | 10512847 | <a href="#">NM_019998</a>          | <a href="#">56737</a>  | asparagine-linked glycosylatio | <a href="#">Alg2</a>               | 0.893 | -2.221 | 0.0606657 | 0.22719  |
| 16345 | 10428412 | <a href="#">NM_026149</a>          | <a href="#">67429</a>  | NudC domain containing 1       | <a href="#">Nudcd1</a>             | 0.893 | -1.742 | 0.123797  | 0.352065 |
| 16346 | 10510391 | <a href="#">NM_009272</a>          | <a href="#">20810</a>  | spermidine synthase            | <a href="#">Srm</a>                | 0.893 | -1.943 | 0.0918427 | 0.293563 |
| 16347 | 10488862 | <a href="#">NM_144786</a>          | <a href="#">207182</a> | gamma-glutamyltransferase 7    | <a href="#">Ggt7</a>               | 0.893 | -1.023 | 0.339235  | 0.614614 |
| 16348 | 10581926 | <a href="#">NM_013925</a>          | <a href="#">30947</a>  | adenosine deaminase, tRNA-spec | <a href="#">Adat1</a>              | 0.893 | -1.666 | 0.138407  | 0.376395 |
| 16349 | 10551173 | <a href="#">NM_138586</a>          | <a href="#">27998</a>  | exosome component 5            | <a href="#">Exosc5</a>             | 0.893 | -1.964 | 0.0890548 | 0.287785 |
| 16350 | 10595280 | <a href="#">NM_009945</a>          | <a href="#">12866</a>  | cytochrome c oxidase, subunit  | <a href="#">Cox7a2</a>             | 0.893 | -2.731 | 0.0284735 | 0.138496 |
| 16351 | 10390059 | <a href="#">NM_145828</a>          | <a href="#">217119</a> | xylosyltransferase II          | <a href="#">Xylt2</a>              | 0.893 | -1.666 | 0.138301  | 0.376252 |
| 16352 | 10542762 | <a href="#">XR_031050</a>          | <a href="#">621842</a> | similar to ribosomal protein S | <a href="#">LOC621842</a>          | 0.893 | -1.226 | 0.258791  | 0.532905 |
| 16353 | 10441339 | <a href="#">ENSMUST00000099483</a> | <a href="#">320586</a> | RIKEN cDNA A630089N07 gene     | <a href="#">A630089N07Rik</a>      | 0.893 | -1.575 | 0.15804   | 0.405065 |
| 16354 | 10468231 | <a href="#">NM_019718</a>          | <a href="#">56350</a>  | ADP-ribosylation factor-like 3 | <a href="#">Arl3</a>               | 0.893 | -2.433 | 0.044253  | 0.185686 |
| 16355 | 10435661 | <a href="#">NM_153394</a>          | <a href="#">239845</a> | G protein-coupled receptor 156 | <a href="#">Gpr156</a>             | 0.893 | -1.267 | 0.244702  | 0.517866 |
| 16356 | 10432886 | <a href="#">NM_008475</a>          | <a href="#">16682</a>  | keratin 4                      | <a href="#">Krt4</a>               | 0.893 | -2.161 | 0.0663356 | 0.240501 |
| 16357 | 10598827 |                                    |                        |                                |                                    | 0.893 | -0.386 | 0.71046   | 0.873031 |
| 16358 | 10488639 | <a href="#">NM_001001444</a>       | <a href="#">75400</a>  | defensin beta 29               | <a href="#">Defb29</a>             | 0.893 | -1.07  | 0.319273  | 0.596377 |
| 16359 | 10486185 | <a href="#">NM_139139</a>          | <a href="#">69408</a>  | DnaJ (Hsp40) homolog, subfamil | <a href="#">Dnajc17</a>            | 0.893 | -0.893 | 0.400615  | 0.666392 |
| 16360 | 10379866 | <a href="#">NM_007607</a>          | <a href="#">12351</a>  | carbonic anhydrase 4           | <a href="#">Car4</a>               | 0.893 | -1.583 | 0.156071  | 0.401895 |
| 16361 | 10542317 | <a href="#">NM_009875</a>          | <a href="#">12576</a>  | cyclin-dependent kinase inhibi | <a href="#">Cdkn1b</a>             | 0.893 | -2.993 | 0.0194375 | 0.107616 |
| 16362 | 10524398 | <a href="#">NM_177292</a>          | <a href="#">320916</a> | WSC domain containing 2        | <a href="#">Wscd2</a>              | 0.893 | -1.19  | 0.271576  | 0.546245 |
| 16363 | 10427026 | <a href="#">NM_019518</a>          | <a href="#">56149</a>  | GRP1 (general receptor for pho | <a href="#">Grasp</a>              | 0.893 | -1.569 | 0.159281  | 0.406366 |
| 16364 | 10516022 |                                    |                        |                                |                                    | 0.893 | -0.997 | 0.350901  | 0.624323 |
| 16365 | 10393406 | <a href="#">XR_034089</a>          | <a href="#">667423</a> | predicted gene, EG667423       | <a href="#">EG667423</a>           | 0.893 | -1.322 | 0.226707  | 0.497406 |

|       |          |                                    |                           |                                    |                                    |       |        |           |          |
|-------|----------|------------------------------------|---------------------------|------------------------------------|------------------------------------|-------|--------|-----------|----------|
| 16366 | 10391669 | <a href="#">NM_026542</a>          | <a href="#">68066</a>     | solute carrier family 25, memb     | <a href="#">Slc25a39</a>           | 0.893 | -2.853 | 0.0238196 | 0.1232   |
| 16367 | 10388728 | <a href="#">ENSMUST00000068419</a> | <a href="#">791423</a>    | predicted gene,<br>OTTMUSG00000000 | <a href="#">OTTMUSG0000000071</a>  | 0.893 | -1.202 | 0.267491  | 0.542213 |
| 16368 | 10533055 | <a href="#">NM_026886</a>          | <a href="#">68955</a>     | RIKEN cDNA 1500001A10<br>gene      | <a href="#">1500001A10Rik</a>      | 0.893 | -1.242 | 0.253267  | 0.527594 |
| 16369 | 10384968 | <a href="#">NM_001024919</a>       | <a href="#">69556</a>     | RIKEN cDNA 2310022M17<br>gene      | <a href="#">2310022M17Rik</a>      | 0.893 | -1.598 | 0.152739  | 0.396795 |
| 16370 | 10489723 | <a href="#">NM_027230</a>          | <a href="#">228880</a>    | protein kinase C binding prote     | <a href="#">Prkcbp1</a>            | 0.893 | -2.701 | 0.0297474 | 0.14282  |
| 16371 | 10588678 | <a href="#">NM_019742</a>          | <a href="#">80385</a>     | tumor suppressor candidate 2       | <a href="#">Tusc2</a>              | 0.893 | -1.435 | 0.193061  | 0.452493 |
| 16372 | 10578287 | <a href="#">NM_011135</a>          | <a href="#">18983</a>     | CCR4-NOT transcription<br>complex  | <a href="#">Cnot7</a>              | 0.892 | -2.536 | 0.0379515 | 0.168193 |
| 16373 | 10383511 | <a href="#">AF285590</a>           | <a href="#">73679</a>     | testis expressed gene 19           | <a href="#">Tex19</a>              | 0.892 | -0.562 | 0.591111  | 0.80656  |
| 16374 | 10575144 | <a href="#">NM_025391</a>          | <a href="#">66164</a>     | nuclear import 7 homolog (S. c     | <a href="#">Nip7</a>               | 0.892 | -2.026 | 0.0812467 | 0.272009 |
| 16375 | 10401286 | <a href="#">NM_001008423</a>       | <a href="#">380768</a>    | gene model 1568, (NCBI)            | <a href="#">Gm1568</a>             | 0.892 | -0.756 | 0.473751  | 0.725344 |
| 16376 | 10357948 | <a href="#">NM_001081307</a>       | <a href="#">329251</a>    | protein phosphatase 1, regulat     | <a href="#">Ppp1r12b</a>           | 0.892 | -1.344 | 0.219844  | 0.488612 |
| 16377 | 10450501 | <a href="#">NM_013693</a>          | <a href="#">21926</a>     | tumor necrosis factor              | <a href="#">Tnf</a>                | 0.892 | -1.292 | 0.236264  | 0.508392 |
| 16378 | 10521566 | <a href="#">NM_025480</a>          | <a href="#">66309</a>     | transmembrane protein 128          | <a href="#">Tmem128</a>            | 0.892 | -2.158 | 0.0666261 | 0.241189 |
| 16379 | 10559043 | <a href="#">NM_010844</a>          | <a href="#">17833</a>     | mucin 5, subtypes A and C, tra     | <a href="#">Muc5ac</a>             | 0.892 | -0.919 | 0.387844  | 0.656721 |
| 16380 | 10425822 | <a href="#">NM_054088</a>          | <a href="#">116939</a>    | patatin-like phospholipase dom     | <a href="#">Pnpla3</a>             | 0.892 | -1.514 | 0.172581  | 0.4249   |
| 16381 | 10600485 | <a href="#">NM_001030307</a>       | <a href="#">245474</a>    | dyskeratosis congenita 1, dysk     | <a href="#">Dkc1</a>               | 0.892 | -1.776 | 0.117715  | 0.342314 |
| 16382 | 10427391 | <a href="#">XR_030618</a>          | <a href="#">100044414</a> | similar to Ewing sarcoma break     | <a href="#">LOC100044414</a>       | 0.892 | -2.309 | 0.0532361 | 0.209301 |
| 16383 | 10505922 |                                    |                           |                                    |                                    | 0.892 | -2.709 | 0.02938   | 0.141538 |
| 16384 | 10507160 |                                    |                           |                                    |                                    | 0.892 | -2.132 | 0.0692782 | 0.246644 |
| 16385 | 10565775 | <a href="#">NM_026384</a>          | <a href="#">67800</a>     | diacylglycerol O-acyltransfera     | <a href="#">Dgat2</a>              | 0.892 | -1.7   | 0.131701  | 0.364584 |
| 16386 | 10456650 |                                    |                           |                                    |                                    | 0.892 | -1.593 | 0.1539    | 0.39844  |
| 16387 | 10502405 | <a href="#">NM_175224</a>          | <a href="#">75624</a>     | methionyl aminopeptidase 1         | <a href="#">Metap1</a>             | 0.892 | -1.372 | 0.211141  | 0.476707 |
| 16388 | 10533725 | <a href="#">NM_175520</a>          | <a href="#">243270</a>    | G protein-coupled receptor 81      | <a href="#">Gpr81</a>              | 0.892 | -1.279 | 0.24059   | 0.513659 |
| 16389 | 10529299 | <a href="#">NM_009193</a>          | <a href="#">20492</a>     | stem-loop binding protein          | <a href="#">Slbp</a>               | 0.892 | -2.156 | 0.0668549 | 0.241483 |
| 16390 | 10510422 | <a href="#">NM_027195</a>          | <a href="#">69743</a>     | castor homolog 1, zinc finger      | <a href="#">Casz1</a>              | 0.892 | -2.876 | 0.0230347 | 0.120616 |
| 16391 | 10368222 | <a href="#">NM_053264</a>          | <a href="#">114671</a>    | RIKEN cDNA 4930444G20<br>gene      | <a href="#">4930444G20Rik</a>      | 0.892 | -0.937 | 0.379136  | 0.648895 |
| 16392 | 10470119 | <a href="#">NM_021519</a>          | <a href="#">59022</a>     | endothelial differentiation-re     | <a href="#">Edf1</a>               | 0.892 | -1.956 | 0.0900751 | 0.289577 |
| 16393 | 10516027 | <a href="#">NM_001081013</a>       | <a href="#">109263</a>    | rearranged L-myc fusion sequen     | <a href="#">Rlf</a>                | 0.892 | -1.459 | 0.186724  | 0.444956 |
| 16394 | 10490097 | <a href="#">NM_175631</a>          | <a href="#">228942</a>    | cerebellin 4 precursor protein     | <a href="#">Cbln4</a>              | 0.892 | -1.081 | 0.314512  | 0.591308 |
| 16395 | 10573112 |                                    |                           |                                    |                                    | 0.892 | -1.671 | 0.137423  | 0.374395 |
| 16396 | 10444708 | <a href="#">NM_148947</a>          | <a href="#">114652</a>    | lymphocyte antigen 6 complex,      | <a href="#">Ly6g5c</a>             | 0.892 | -1.237 | 0.254995  | 0.529326 |
| 16397 | 10384183 | <a href="#">NM_001081652</a>       | <a href="#">192950</a>    | cDNA sequence AB182283             | <a href="#">AB182283</a>           | 0.892 | -1.714 | 0.12904   | 0.360251 |
| 16398 | 10538115 | <a href="#">NM_001077410</a>       | <a href="#">243374</a>    | GTPase, IMAP family member 8       | <a href="#">Gimap8</a>             | 0.892 | -0.875 | 0.409984  | 0.674344 |
| 16399 | 10567043 | <a href="#">NM_025846</a>          | <a href="#">66922</a>     | related RAS viral (r-ras) onco     | <a href="#">Rras2</a>              | 0.892 | -2.077 | 0.0752825 | 0.2595   |
| 16400 | 10416353 |                                    |                           |                                    |                                    | 0.892 | -0.569 | 0.586525  | 0.803673 |
| 16401 | 10435453 |                                    |                           |                                    |                                    | 0.892 | -0.92  | 0.387465  | 0.656379 |
| 16402 | 10516590 | <a href="#">NM_028603</a>          | <a href="#">73680</a>     | RIKEN cDNA 2410081M15<br>gene      | <a href="#">2410081M15Rik</a>      | 0.892 | -1.699 | 0.131835  | 0.364763 |
| 16403 | 10409586 | <a href="#">NM_008373</a>          | <a href="#">16198</a>     | interleukin 9                      | <a href="#">Il9</a>                | 0.892 | -1.497 | 0.176734  | 0.430877 |
| 16404 | 10564313 | <a href="#">NM_026483</a>          | <a href="#">67973</a>     | M-phase phosphoprotein 10 (U3      | <a href="#">Mphosph10</a>          | 0.892 | -2.076 | 0.0753753 | 0.259624 |
| 16405 | 10457429 | <a href="#">NM_009071</a>          | <a href="#">19877</a>     | Rho-associated coiled-coil con     | <a href="#">Rock1</a>              | 0.892 | -2.131 | 0.0694671 | 0.246984 |
| 16406 | 10346611 | <a href="#">NM_001013771</a>       | <a href="#">381260</a>    | gene model 973, (NCBI)             | <a href="#">Gm973</a>              | 0.892 | -1.268 | 0.244179  | 0.517327 |
| 16407 | 10372078 | <a href="#">NM_026065</a>          | <a href="#">67270</a>     | DNA segment, Chr 10, ERATO<br>Doi  | <a href="#">D10Ertd322e</a>        | 0.892 | -2.078 | 0.0751702 | 0.259229 |
| 16408 | 10582978 | <a href="#">BC014729</a>           | <a href="#">78100</a>     | RIKEN cDNA 8430410K20<br>gene      | <a href="#">8430410K20Rik</a>      | 0.892 | -2.446 | 0.0434066 | 0.18312  |
| 16409 | 10456361 | <a href="#">ENSMUST00000066628</a> | <a href="#">791372</a>    | predicted gene,<br>ENSMUSG0000005  | <a href="#">ENSMUSG00000053891</a> | 0.892 | -1.989 | 0.0857729 | 0.281088 |
| 16410 | 10516227 | <a href="#">ENSMUST00000053604</a> | <a href="#">70249</a>     | RIKEN cDNA 3100002H09<br>gene      | <a href="#">3100002H09Rik</a>      | 0.892 | -0.688 | 0.512984  | 0.753467 |
| 16411 | 10586357 | <a href="#">NM_173385</a>          | <a href="#">214425</a>    | cartilage intermediate layer p     | <a href="#">Cilp</a>               | 0.892 | -1.322 | 0.226579  | 0.497227 |
| 16412 | 10516620 | <a href="#">NM_010693</a>          | <a href="#">16818</a>     | lymphocyte protein tyrosine ki     | <a href="#">Lck</a>                | 0.892 | -1.201 | 0.267824  | 0.542576 |
| 16413 | 10380560 | <a href="#">NM_201609</a>          | <a href="#">268469</a>    | zinc finger protein 652            | <a href="#">Zfp652</a>             | 0.892 | -2.237 | 0.0592061 | 0.224025 |
| 16414 | 10391895 | <a href="#">NM_133715</a>          | <a href="#">544817</a>    | Rho GTPase activating protein      | <a href="#">Arhgap27</a>           | 0.892 | -1.635 | 0.144772  | 0.386155 |
| 16415 | 10515759 |                                    |                           |                                    |                                    | 0.892 | -1.855 | 0.104722  | 0.218627 |

| 10415 | 10545738 |                                    |                           |                                   |                                    | 0.892 | -1.855 | 0.104732  | 0.318027  |
|-------|----------|------------------------------------|---------------------------|-----------------------------------|------------------------------------|-------|--------|-----------|-----------|
| 16416 | 10382932 | <a href="#">ENSMUST00000067484</a> | <a href="#">78403</a>     | RIKEN cDNA 2900041M22 gene        | <a href="#">2900041M22Rik</a>      | 0.892 | -1.634 | 0.145092  | 0.386717  |
| 16417 | 10516427 | <a href="#">NM_011986</a>          | <a href="#">26562</a>     | neurochondrin                     | <a href="#">Ncdn</a>               | 0.892 | -2.715 | 0.0291353 | 0.140551  |
| 16418 | 10524314 | <a href="#">NM_019640</a>          | <a href="#">56305</a>     | phosphatidylinositol transfer     | <a href="#">Pitpnb</a>             | 0.892 | -2.902 | 0.0221643 | 0.117219  |
| 16419 | 10566219 | <a href="#">NM_147081</a>          | <a href="#">259085</a>    | olfactory receptor 610            | <a href="#">Olfr610</a>            | 0.892 | -1.517 | 0.171716  | 0.423956  |
| 16420 | 10557359 | <a href="#">NM_001081022</a>       | <a href="#">233865</a>    | RIKEN cDNA D430042O09 gene        | <a href="#">D430042O09Rik</a>      | 0.892 | -1.938 | 0.0925948 | 0.294729  |
| 16421 | 10515729 | <a href="#">ENSMUST00000075406</a> | <a href="#">230676</a>    | cDNA sequence BC059842            | <a href="#">BC059842</a>           | 0.892 | -1.167 | 0.280495  | 0.555889  |
| 16422 | 10546244 | <a href="#">XM_994764</a>          | <a href="#">71797</a>     | carbohydrate (chondroitin 4) s    | <a href="#">Chst13</a>             | 0.892 | -1.759 | 0.120649  | 0.347112  |
| 16423 | 10448743 | <a href="#">NM_023480</a>          | <a href="#">68636</a>     | fumarylacetoacetate hydrolase     | <a href="#">Fahd1</a>              | 0.892 | -2.064 | 0.0767314 | 0.262653  |
| 16424 | 10394794 | <a href="#">BC030401</a>           | <a href="#">245297</a>    | predicted gene, EG245297          | <a href="#">EG245297</a>           | 0.891 | -1.396 | 0.204143  | 0.467365  |
| 16425 | 10437311 | <a href="#">NM_026508</a>          | <a href="#">68015</a>     | TNF receptor-associated protei    | <a href="#">Trap1</a>              | 0.891 | -3.078 | 0.0172091 | 0.0991856 |
| 16426 | 10383202 | <a href="#">ENSMUST00000093902</a> | <a href="#">672511</a>    | hypothetical LOC672511            | <a href="#">LOC672511</a>          | 0.891 | -1.326 | 0.225294  | 0.495384  |
| 16427 | 10445607 | <a href="#">NM_145488</a>          | <a href="#">224824</a>    | peroxisomal biogenesis factor     | <a href="#">Pex6</a>               | 0.891 | -2.102 | 0.0725178 | 0.253692  |
| 16428 | 10594911 | <a href="#">NM_009359</a>          | <a href="#">21778</a>     | testis expressed gene 9           | <a href="#">Tex9</a>               | 0.891 | -2.234 | 0.0595504 | 0.224825  |
| 16429 | 10449661 | <a href="#">NM_009363</a>          | <a href="#">21785</a>     | trefoil factor 2 (spasmolytic     | <a href="#">Tff2</a>               | 0.891 | -1.105 | 0.30469   | 0.581126  |
| 16430 | 10587194 | <a href="#">NM_138719</a>          | <a href="#">14697</a>     | guanine nucleotide binding pro    | <a href="#">Gnb5</a>               | 0.891 | -1.142 | 0.290034  | 0.566261  |
| 16431 | 10560078 | <a href="#">NM_145819</a>          | <a href="#">109889</a>    | myeloid zinc finger 1             | <a href="#">Mzf1</a>               | 0.891 | -1.366 | 0.21302   | 0.478905  |
| 16432 | 10459879 | <a href="#">NM_207651</a>          | <a href="#">27411</a>     | solute carrier family 14 (urea    | <a href="#">Slc14a2</a>            | 0.891 | -1.028 | 0.337206  | 0.612796  |
| 16433 | 10440655 | <a href="#">ENSMUST00000052337</a> | <a href="#">69699</a>     | RIKEN cDNA 2310079G19             | <a href="#">2310079G19Rik</a>      | 0.891 | -1.07  | 0.31893   | 0.596119  |
| 16434 | 10454202 | <a href="#">NM_207623</a>          | <a href="#">56515</a>     | gene<br>zinc finger protein 138   | <a href="#">Rnf138</a>             | 0.891 | -1.484 | 0.180037  | 0.435501  |
| 16435 | 10453604 | <a href="#">NM_026505</a>          | <a href="#">68010</a>     | BMP and activin membrane-bound    | <a href="#">Bambi</a>              | 0.891 | -1.774 | 0.11803   | 0.342994  |
| 16436 | 10371670 |                                    |                           |                                   |                                    | 0.891 | -0.744 | 0.480277  | 0.729941  |
| 16437 | 10514558 | <a href="#">XR_004941</a>          | <a href="#">676606</a>    | similar to heterogeneous nucle    | <a href="#">LOC676606</a>          | 0.891 | -2.132 | 0.0693509 | 0.246733  |
| 16438 | 10525542 | <a href="#">NM_029850</a>          | <a href="#">77045</a>     | B-cell CLL/lymphoma 7A            | <a href="#">Bcl7a</a>              | 0.891 | -2.679 | 0.0307129 | 0.145866  |
| 16439 | 10367122 | <a href="#">NM_054078</a>          | <a href="#">116848</a>    | bromodomain adjacent to zinc f    | <a href="#">Baz2a</a>              | 0.891 | -2.585 | 0.0352694 | 0.159823  |
| 16440 | 10470909 |                                    |                           |                                   |                                    | 0.891 | -1.333 | 0.222957  | 0.492859  |
| 16441 | 10349637 | <a href="#">BC145667</a>           | <a href="#">108900</a>    | RIKEN cDNA 2700049P18 gene        | <a href="#">2700049P18Rik</a>      | 0.891 | -1.893 | 0.0989944 | 0.307265  |
| 16442 | 10518313 | <a href="#">NM_009401</a>          | <a href="#">21941</a>     | tumor necrosis factor receptor    | <a href="#">Tnfrsf8</a>            | 0.891 | -1.589 | 0.154839  | 0.400004  |
| 16443 | 10443191 | <a href="#">ENSMUST00000097363</a> | <a href="#">100038429</a> | predicted gene,<br>ENSMUSG0000007 | <a href="#">ENSMUSG00000073430</a> | 0.891 | -1.111 | 0.302182  | 0.578377  |
| 16444 | 10519527 | <a href="#">NM_011076</a>          | <a href="#">18671</a>     | ATP-binding cassette, sub-fami    | <a href="#">Abcb1a</a>             | 0.891 | -0.945 | 0.375325  | 0.64535   |
| 16445 | 10453436 | <a href="#">NM_176808</a>          | <a href="#">193813</a>    | multiple coagulation factor de    | <a href="#">Mcf2</a>               | 0.891 | -2.349 | 0.0501063 | 0.201363  |
| 16446 | 10432866 | <a href="#">NM_001003667</a>       | <a href="#">406220</a>    | keratin 77                        | <a href="#">Krt77</a>              | 0.891 | -0.84  | 0.42796   | 0.689167  |
| 16447 | 10364155 | <a href="#">NM_029816</a>          | <a href="#">76964</a>     | RIKEN cDNA 2610028H24 gene        | <a href="#">2610028H24Rik</a>      | 0.891 | -1.475 | 0.182516  | 0.439034  |
| 16448 | 10555919 | <a href="#">NM_146355</a>          | <a href="#">258352</a>    | olfactory receptor 692            | <a href="#">Olfr692</a>            | 0.891 | -1.216 | 0.26214   | 0.536615  |
| 16449 | 10552075 | <a href="#">NM_144556</a>          | <a href="#">243914</a>    | leucine-rich repeat LGI family    | <a href="#">Lgi4</a>               | 0.891 | -1.294 | 0.235644  | 0.507379  |
| 16450 | 10359086 | <a href="#">BC089561</a>           | <a href="#">74081</a>     | centrosomal protein 350           | <a href="#">Cep350</a>             | 0.891 | -1.7   | 0.131633  | 0.364442  |
| 16451 | 10546129 | <a href="#">AK016973</a>           | <a href="#">74589</a>     | kelch domain containing 6         | <a href="#">Klhd6</a>              | 0.891 | -1.589 | 0.154823  | 0.400004  |
| 16452 | 10366544 | <a href="#">AF221104</a>           | <a href="#">94118</a>     | kinesin family member C5C         | <a href="#">Kif5c</a>              | 0.891 | -0.965 | 0.365567  | 0.636806  |
| 16453 | 10349711 | <a href="#">NM_173865</a>          | <a href="#">98396</a>     | solute carrier family 41, memb    | <a href="#">Slc41a1</a>            | 0.891 | -2.043 | 0.0792269 | 0.268035  |
| 16454 | 10382409 | <a href="#">NM_001102615</a>       | <a href="#">286942</a>    | kinesin family member 19A         | <a href="#">Kif19a</a>             | 0.891 | -0.976 | 0.360543  | 0.632355  |
| 16455 | 10485830 | <a href="#">NM_026519</a>          | <a href="#">68032</a>     | transmembrane protein 85          | <a href="#">Tmem85</a>             | 0.891 | -2.663 | 0.0314466 | 0.14825   |
| 16456 | 10445803 | <a href="#">NM_152823</a>          | <a href="#">76589</a>     | unc-5 homolog C (C. elegans)-1    | <a href="#">Unc5cl</a>             | 0.891 | -1.203 | 0.266956  | 0.541627  |
| 16457 | 10352514 | <a href="#">NM_029735</a>          | <a href="#">107508</a>    | glutamyl-prolyl-tRNA synthetas    | <a href="#">Eprs</a>               | 0.891 | -2.912 | 0.021868  | 0.116321  |
| 16458 | 10380318 |                                    |                           |                                   |                                    | 0.891 | -1.139 | 0.290996  | 0.567132  |
| 16459 | 10520025 | <a href="#">NM_011188</a>          | <a href="#">19181</a>     | proteasome (prosome, macropain    | <a href="#">Psmc2</a>              | 0.891 | -2.784 | 0.0263399 | 0.131631  |
| 16460 | 10381385 |                                    |                           |                                   |                                    | 0.89  | -0.624 | 0.551655  | 0.781685  |
| 16461 | 10557139 | <a href="#">NM_138589</a>          | <a href="#">28018</a>     | ubiquitin family domain contai    | <a href="#">Ubf1</a>               | 0.89  | -1.992 | 0.0854547 | 0.280611  |
| 16462 | 10585706 | <a href="#">NM_007747</a>          | <a href="#">12858</a>     | cytochrome c oxidase, subunit     | <a href="#">Cox5a</a>              | 0.89  | -2.575 | 0.0357977 | 0.16125   |
| 16463 | 10477006 | <a href="#">NM_198326</a>          | <a href="#">386649</a>    | NSFL1 (p97) cofactor (p47)        | <a href="#">Nsf1c</a>              | 0.89  | -2.582 | 0.0354664 | 0.160407  |
| 16464 | 10554502 | <a href="#">NM_001004184</a>       | <a href="#">434203</a>    | solute carrier family 28 (sodi    | <a href="#">Slc28a1</a>            | 0.89  | -0.899 | 0.39756   | 0.664302  |
| 16465 | 10549635 | <a href="#">NM_001081239</a>       | <a href="#">232801</a>    | predicted gene, EG232801          | <a href="#">EG232801</a>           | 0.89  | -1.324 | 0.226065  | 0.496626  |
| 16466 | 10592938 | <a href="#">BC026825</a>           | <a href="#">192653</a>    | cDNA sequence BC021608            | <a href="#">BC021608</a>           | 0.89  | -1.343 | 0.219852  | 0.488612  |

|       |          |                                    |                           |                                |                                    |       |        |           |           |
|-------|----------|------------------------------------|---------------------------|--------------------------------|------------------------------------|-------|--------|-----------|-----------|
| 16467 | 10504094 | <a href="#">NM_016658</a>          | <a href="#">14430</a>     | galactose-1-phosphate uridyl t | <a href="#">Galt</a>               | 0.89  | -1.403 | 0.202131  | 0.464903  |
| 16468 | 10562416 | <a href="#">NM_009884</a>          | <a href="#">12611</a>     | CCAAT/enhancer binding protein | <a href="#">Cebpg</a>              | 0.89  | -2.861 | 0.0235503 | 0.122106  |
| 16469 | 10476106 |                                    |                           |                                |                                    | 0.89  | -0.575 | 0.582614  | 0.800924  |
| 16470 | 10484861 | <a href="#">NM_020515</a>          | <a href="#">57272</a>     | olfactory receptor 140         | <a href="#">Olf140</a>             | 0.89  | -1.139 | 0.291058  | 0.567201  |
| 16471 | 10515935 | <a href="#">NM_008191</a>          | <a href="#">14916</a>     | guanylate cyclase activator 2b | <a href="#">Guca2b</a>             | 0.89  | -1.392 | 0.205404  | 0.469103  |
| 16472 | 10478943 | <a href="#">NM_001110152</a>       | <a href="#">109054</a>    | prefoldin 4                    | <a href="#">Pfdn4</a>              | 0.89  | -2.099 | 0.0727933 | 0.25432   |
| 16473 | 10452295 | <a href="#">NM_009451</a>          | <a href="#">22153</a>     | tubulin, beta 4                | <a href="#">Tubb4</a>              | 0.89  | -2.583 | 0.0354175 | 0.1603    |
| 16474 | 10605338 | <a href="#">NM_008062</a>          | <a href="#">14381</a>     | glucose-6-phosphate dehydrogen | <a href="#">G6pdx</a>              | 0.89  | -2.506 | 0.0396893 | 0.173124  |
| 16475 | 10525835 |                                    |                           |                                |                                    | 0.89  | -1.425 | 0.195831  | 0.456219  |
| 16476 | 10412227 | <a href="#">NM_130796</a>          | <a href="#">170625</a>    | sorting nexin 18               | <a href="#">Snx18</a>              | 0.89  | -2.305 | 0.0535448 | 0.209868  |
| 16477 | 10450746 | <a href="#">NM_026308</a>          | <a href="#">67676</a>     | ribonuclease P 21 subunit (hum | <a href="#">Rpp21</a>              | 0.89  | -1.724 | 0.127197  | 0.35745   |
| 16478 | 10526145 | <a href="#">BC033455</a>           | <a href="#">71667</a>     | RIKEN cDNA 0610007L01 gene     | <a href="#">0610007L01Rik</a>      | 0.89  | -3.26  | 0.0133018 | 0.0828894 |
| 16479 | 10436662 |                                    |                           |                                |                                    | 0.89  | -1.475 | 0.182589  | 0.439161  |
| 16480 | 10406423 | <a href="#">NM_028372</a>          | <a href="#">72852</a>     | RIKEN cDNA 2900024O10 gene     | <a href="#">2900024O10Rik</a>      | 0.89  | -1.695 | 0.132663  | 0.366336  |
| 16481 | 10399882 | <a href="#">NM_028002</a>          | <a href="#">71916</a>     | dihydrouridine synthase 4-like | <a href="#">Dus4l</a>              | 0.89  | -1.442 | 0.19127   | 0.450457  |
| 16482 | 10381574 | <a href="#">NM_016759</a>          | <a href="#">51799</a>     | RUN domain containing 3A       | <a href="#">Rundc3a</a>            | 0.89  | -1.194 | 0.270171  | 0.545029  |
| 16483 | 10504514 | <a href="#">ENSMUST00000095105</a> | <a href="#">73405</a>     | RIKEN cDNA 1700055D18 gene     | <a href="#">1700055D18Rik</a>      | 0.89  | -1.386 | 0.206974  | 0.471406  |
| 16484 | 10593101 | <a href="#">XR_034358</a>          | <a href="#">640094</a>    | similar to Glyceraldehyde-3-ph | <a href="#">LOC640094</a>          | 0.89  | -1.026 | 0.338128  | 0.613733  |
| 16485 | 10429970 | <a href="#">ENSMUST00000100504</a> | <a href="#">100038562</a> | predicted gene, ENSMUSG0000007 | <a href="#">ENSMUSG00000075578</a> | 0.89  | -1.175 | 0.277187  | 0.552231  |
| 16486 | 10414265 | <a href="#">BC061237</a>           | <a href="#">385138</a>    | cDNA sequence BC061237         | <a href="#">BC061237</a>           | 0.89  | -1.584 | 0.156003  | 0.401839  |
| 16487 | 10566593 |                                    |                           |                                |                                    | 0.89  | -0.867 | 0.413927  | 0.677396  |
| 16488 | 10500754 | <a href="#">NM_011516</a>          | <a href="#">20957</a>     | synaptonemal complex protein 1 | <a href="#">Sycp1</a>              | 0.89  | -0.779 | 0.460879  | 0.715479  |
| 16489 | 10365335 |                                    |                           |                                |                                    | 0.89  | -0.813 | 0.44224   | 0.700945  |
| 16490 | 10497201 |                                    |                           |                                |                                    | 0.89  | -1.362 | 0.214106  | 0.480529  |
| 16491 | 10386173 | <a href="#">BC048595</a>           | <a href="#">403200</a>    | RIKEN cDNA 4930504O13 gene     | <a href="#">4930504O13Rik</a>      | 0.89  | -1.237 | 0.254714  | 0.528967  |
| 16492 | 10499247 | <a href="#">NM_001033124</a>       | <a href="#">18211</a>     | neurotrophic tyrosine kinase,  | <a href="#">Ntrk1</a>              | 0.89  | -1.38  | 0.208963  | 0.473969  |
| 16493 | 10559415 | <a href="#">NM_027203</a>          | <a href="#">69757</a>     | leukocyte receptor cluster (LR | <a href="#">Leng1</a>              | 0.89  | -1.324 | 0.226057  | 0.496626  |
| 16494 | 10517774 | <a href="#">NM_153106</a>          | <a href="#">242726</a>    | peptidyl arginine deiminase, t | <a href="#">Padi6</a>              | 0.89  | -1.473 | 0.182973  | 0.439824  |
| 16495 | 10432780 | <a href="#">NM_008476</a>          | <a href="#">16687</a>     | keratin 6A                     | <a href="#">Krt6a</a>              | 0.89  | -0.424 | 0.684045  | 0.860099  |
| 16496 | 10382271 | <a href="#">NM_028710</a>          | <a href="#">74008</a>     | arylsulfatase G                | <a href="#">Arsg</a>               | 0.89  | -1.188 | 0.272556  | 0.547117  |
| 16497 | 10344815 | <a href="#">NM_026493</a>          | <a href="#">211660</a>    | centrosome and spindle pole as | <a href="#">Cspp1</a>              | 0.89  | -1.878 | 0.101211  | 0.311546  |
| 16498 | 10398721 | <a href="#">BC071262</a>           | <a href="#">68020</a>     | RIKEN cDNA 2810002N01 gene     | <a href="#">2810002N01Rik</a>      | 0.89  | -1.617 | 0.148664  | 0.390994  |
| 16499 | 10390299 | <a href="#">NM_134021</a>          | <a href="#">103711</a>    | pyridoxine 5'-phosphate oxidas | <a href="#">Pnpo</a>               | 0.89  | -1.718 | 0.128307  | 0.359233  |
| 16500 | 10512704 | <a href="#">NM_025513</a>          | <a href="#">66362</a>     | exosome component 3            | <a href="#">Exosc3</a>             | 0.89  | -1.804 | 0.113028  | 0.333083  |
| 16501 | 10468517 |                                    |                           |                                |                                    | 0.89  | -0.957 | 0.369462  | 0.640058  |
| 16502 | 10365134 | <a href="#">NM_001011859</a>       | <a href="#">258165</a>    | olfactory receptor 965         | <a href="#">Olf1965</a>            | 0.889 | -1.894 | 0.0987865 | 0.306898  |
| 16503 | 10384502 |                                    |                           |                                |                                    | 0.889 | -0.914 | 0.392072  | 0.306929  |
| 16504 | 10575376 | <a href="#">BC025546</a>           | <a href="#">234728</a>    | cDNA sequence BC025546         | <a href="#">BC025546</a>           | 0.89  | -2.206 | 0.0620343 | 0.230276  |
| 16505 | 10443808 | <a href="#">NM_030087</a>          | <a href="#">78330</a>     | RIKEN cDNA 1500032D16 gene     | <a href="#">1500032D16Rik</a>      | 0.89  | -1.737 | 0.124727  | 0.353522  |
| 16506 | 10504504 | <a href="#">NM_080289</a>          | <a href="#">76238</a>     | glyoxylate reductase/hydroxypy | <a href="#">Grhpr</a>              | 0.89  | -3.265 | 0.0132139 | 0.0825633 |
| 16507 | 10419005 | <a href="#">NM_021340</a>          | <a href="#">57811</a>     | retinal G protein coupled rece | <a href="#">Rgr</a>                | 0.89  | -1.976 | 0.0875068 | 0.284741  |
| 16508 | 10476192 | <a href="#">NM_011025</a>          | <a href="#">18429</a>     | oxytocin                       | <a href="#">Oxt</a>                | 0.889 | -1.18  | 0.27528   | 0.550143  |
| 16509 | 10518019 | <a href="#">NM_001017966</a>       | <a href="#">68817</a>     | DNA-damage inducible protein 2 | <a href="#">Ddi2</a>               | 0.889 | -2.262 | 0.0570824 | 0.218492  |
| 16510 | 10469135 |                                    |                           |                                |                                    | 0.889 | -1.67  | 0.137496  | 0.374537  |
| 16511 | 10357051 | <a href="#">NM_027534</a>          | <a href="#">70750</a>     | 3-ketodihydroshingosine reduc  | <a href="#">Kdsr</a>               | 0.889 | -2.18  | 0.0644793 | 0.236295  |
| 16512 | 10517236 | <a href="#">NM_024215</a>          | <a href="#">68040</a>     | zinc finger protein 593        | <a href="#">Zfp593</a>             | 0.889 | -2.524 | 0.0386056 | 0.16991   |
| 16513 | 10364239 | <a href="#">NM_031196</a>          | <a href="#">20509</a>     | solute carrier family 19 (sodi | <a href="#">Sle19a1</a>            | 0.889 | -2.13  | 0.0695599 | 0.24723   |
| 16514 | 10525751 | <a href="#">NM_026409</a>          | <a href="#">67848</a>     | DEAD (Asp-Glu-Ala-Asp) box pol | <a href="#">Ddx55</a>              | 0.889 | -2.78  | 0.026496  | 0.132161  |
| 16515 | 10358677 | <a href="#">BC060204</a>           | <a href="#">66875</a>     | RIKEN cDNA 1200016B10 gene     | <a href="#">1200016B10Rik</a>      | 0.889 | -2.241 | 0.0589024 | 0.223325  |
| 16516 | 10504666 |                                    |                           |                                |                                    | 0.889 | -1.967 | 0.0886587 | 0.286953  |

|       |          |                                    |                        |                                |                               |       |        |            |           |
|-------|----------|------------------------------------|------------------------|--------------------------------|-------------------------------|-------|--------|------------|-----------|
| 16517 | 10451472 | <a href="#">NM_025433</a>          | <a href="#">66229</a>  | ribosomal protein L7-like 1    | <a href="#">Rpl7l1</a>        | 0.889 | -2.734 | 0.0283465  | 0.138133  |
| 16518 | 10533875 | <a href="#">NM_011424</a>          | <a href="#">20602</a>  | nuclear receptor co-repressor  | <a href="#">Ncor2</a>         | 0.889 | -3.052 | 0.0178667  | 0.10147   |
| 16519 | 10461130 | <a href="#">NM_008766</a>          | <a href="#">18399</a>  | solute carrier family 22 (orga | <a href="#">Slc22a6</a>       | 0.889 | -1.174 | 0.277749   | 0.552831  |
| 16520 | 10457776 |                                    |                        |                                |                               | 0.889 | -0.723 | 0.492266   | 0.738375  |
| 16521 | 10355464 | <a href="#">NM_023523</a>          | <a href="#">111175</a> | peroxisomal trans-2-enoyl-CoA  | <a href="#">Pecr</a>          | 0.889 | -1.984 | 0.0865104  | 0.282717  |
| 16522 | 10413987 | <a href="#">XM_985917</a>          | <a href="#">268729</a> | gene model 626, (NCBI)         | <a href="#">Gm626</a>         | 0.889 | -0.946 | 0.374597   | 0.644557  |
| 16523 | 10530683 | <a href="#">NM_028850</a>          | <a href="#">74277</a>  | cysteine-rich hydrophobic doma | <a href="#">Chic2</a>         | 0.889 | -2.625 | 0.0332778  | 0.153865  |
| 16524 | 10433940 | <a href="#">NM_011949</a>          | <a href="#">26413</a>  | mitogen-activated protein kina | <a href="#">Mapk1</a>         | 0.889 | -2.528 | 0.0384101  | 0.169439  |
| 16525 | 10400336 | <a href="#">NM_026998</a>          | <a href="#">72183</a>  | sorting nexin 6                | <a href="#">Snx6</a>          | 0.889 | -2.291 | 0.054675   | 0.213057  |
| 16526 | 10463856 | <a href="#">BC057135</a>           | <a href="#">381229</a> | coiled-coil domain containing  | <a href="#">Ccdc147</a>       | 0.889 | -1.467 | 0.184582   | 0.442145  |
| 16527 | 10561516 | <a href="#">NM_010908</a>          | <a href="#">18036</a>  | nuclear factor of kappa light  | <a href="#">Nfkbib</a>        | 0.889 | -2.217 | 0.0610032  | 0.227923  |
| 16528 | 10493860 | <a href="#">NM_011469</a>          | <a href="#">20756</a>  | small proline-rich protein 2B  | <a href="#">Sprr2b</a>        | 0.889 | -0.531 | 0.61115    | 0.819466  |
| 16529 | 10554034 | <a href="#">DQ646881</a>           | <a href="#">545975</a> | LAG1 homolog, ceramide synthas | <a href="#">Lass3</a>         | 0.889 | -1.761 | 0.120378   | 0.346744  |
| 16530 | 10507471 | <a href="#">XM_903276</a>          | <a href="#">630172</a> | similar to DNA-directed RNA po | <a href="#">LOC630172</a>     | 0.889 | -2.169 | 0.0655611  | 0.2387    |
| 16531 | 10440729 | <a href="#">ENSMUST00000056118</a> | <a href="#">71363</a>  | keratin associated protein 7-1 | <a href="#">Krtap7-1</a>      | 0.889 | -1.958 | 0.0898199  | 0.289247  |
| 16532 | 10394240 | <a href="#">NM_008895</a>          | <a href="#">18976</a>  | pro-opiomelanocortin-alpha     | <a href="#">Pomc</a>          | 0.889 | -1.89  | 0.099486   | 0.30816   |
| 16533 | 10424825 | <a href="#">NM_025567</a>          | <a href="#">66445</a>  | cytochrome c-1                 | <a href="#">Cyc1</a>          | 0.889 | -3.643 | 0.00783892 | 0.0571538 |
| 16534 | 10388613 | <a href="#">NM_001012309</a>       | <a href="#">237859</a> | coiled-coil domain containing  | <a href="#">Ccdc55</a>        | 0.889 | -2.188 | 0.0637282  | 0.234383  |
| 16535 | 10429641 | <a href="#">NM_172607</a>          | <a href="#">223646</a> | nicotinate phosphoribosyltrans | <a href="#">Naprt1</a>        | 0.889 | -1.618 | 0.148332   | 0.390528  |
| 16536 | 10389331 | <a href="#">NM_001005223</a>       | <a href="#">448850</a> | zinc finger, HIT type 3        | <a href="#">Znhit3</a>        | 0.889 | -2.436 | 0.0440283  | 0.184892  |
| 16537 | 10466000 | <a href="#">NM_028411</a>          | <a href="#">72982</a>  | transmembrane protein 138      | <a href="#">Tmem138</a>       | 0.889 | -1.206 | 0.266029   | 0.54117   |
| 16538 | 10404038 | <a href="#">NM_178204</a>          | <a href="#">319149</a> | histone cluster 1, H3d         | <a href="#">Hist1h3d</a>      | 0.889 | -1.627 | 0.146435   | 0.388184  |
| 16539 | 10524889 | <a href="#">NM_001114545</a>       | <a href="#">333050</a> | kinase suppressor of ras 2     | <a href="#">Ksr2</a>          | 0.889 | -1.594 | 0.153797   | 0.398319  |
| 16540 | 10550998 | <a href="#">BC100485</a>           | <a href="#">545936</a> | predicted gene, EG545936       | <a href="#">EG545936</a>      | 0.889 | -1.381 | 0.208641   | 0.47344   |
| 16541 | 10581729 | <a href="#">NM_007916</a>          | <a href="#">13680</a>  | DEAD (Asp-Glu-Ala-Asp) box pol | <a href="#">Ddx19a</a>        | 0.889 | -1.941 | 0.0921234  | 0.294194  |
| 16542 | 10582649 | <a href="#">NM_171824</a>          | <a href="#">209966</a> | piggyBac transposable element  | <a href="#">Pgbd5</a>         | 0.889 | -0.882 | 0.406142   | 0.670739  |
| 16543 | 10553199 | <a href="#">U96411</a>             | <a href="#">18419</a>  | otogelin                       | <a href="#">Otog</a>          | 0.889 | -2.024 | 0.0814359  | 0.272449  |
| 16544 | 10347639 | <a href="#">NM_133708</a>          | <a href="#">69080</a>  | GDP-mannose pyrophosphorylase  | <a href="#">Gmppa</a>         | 0.889 | -2.381 | 0.0477665  | 0.194851  |
| 16545 | 10598493 | <a href="#">NM_013892</a>          | <a href="#">30052</a>  | proprotein convertase subtilis | <a href="#">Pcsk1n</a>        | 0.889 | -2.912 | 0.021866   | 0.116321  |
| 16546 | 10386033 | <a href="#">NM_001029988</a>       | <a href="#">245827</a> | FAT tumor suppressor homolog 2 | <a href="#">Fat2</a>          | 0.889 | -1.288 | 0.23758    | 0.509988  |
| 16547 | 10517646 | <a href="#">NM_012045</a>          | <a href="#">26971</a>  | phospholipase A2, group IIF    | <a href="#">Pla2g2f</a>       | 0.889 | -1.883 | 0.100415   | 0.310087  |
| 16548 | 10381211 | <a href="#">NM_013792</a>          | <a href="#">27419</a>  | alpha-N-acetylglucosaminidase  | <a href="#">Naglu</a>         | 0.889 | -1.258 | 0.247742   | 0.520858  |
| 16549 | 10424705 | <a href="#">XM_001481291</a>       | <a href="#">72665</a>  | RIKEN cDNA 2810039B14 gene     | <a href="#">2810039B14Rik</a> | 0.889 | -1.554 | 0.162887   | 0.411627  |
| 16550 | 10538887 | <a href="#">ENSMUST00000103319</a> | <a href="#">381776</a> | predicted gene, EG381776       | <a href="#">EG381776</a>      | 0.889 | -1.263 | 0.245736   | 0.518859  |
| 16551 | 10464612 | <a href="#">NM_144532</a>          | <a href="#">73660</a>  | calcium binding protein 4      | <a href="#">Cabp4</a>         | 0.889 | -1.028 | 0.337023   | 0.612719  |
| 16552 | 10437384 | <a href="#">NM_031182</a>          | <a href="#">83383</a>  | transcription factor AP4       | <a href="#">Tcfap4</a>        | 0.889 | -1.82  | 0.110337   | 0.328633  |
| 16553 | 10487340 | <a href="#">NM_144818</a>          | <a href="#">215387</a> | non-SMC condensin I complex, s | <a href="#">Ncaph</a>         | 0.889 | -2.681 | 0.0306166  | 0.14567   |
| 16554 | 10531529 | <a href="#">NM_178854</a>          | <a href="#">231464</a> | CCR4-NOT transcription complex | <a href="#">Cnot6l</a>        | 0.889 | -1.218 | 0.261492   | 0.536057  |
| 16555 | 10471058 | <a href="#">NM_030137</a>          | <a href="#">78617</a>  | CSA-conditional, T cell activa | <a href="#">Cstad</a>         | 0.888 | -1.392 | 0.205448   | 0.469103  |
| 16556 | 10532580 | <a href="#">XM_912851</a>          | <a href="#">74376</a>  | myosin XVIIIb                  | <a href="#">Myo18b</a>        | 0.888 | -1.366 | 0.212933   | 0.478759  |
| 16557 | 10501244 | <a href="#">NM_028779</a>          | <a href="#">109674</a> | adenosine monophosphate deamin | <a href="#">Ampd2</a>         | 0.888 | -1.806 | 0.112699   | 0.332576  |
| 16558 | 10447254 | <a href="#">NM_011151</a>          | <a href="#">19043</a>  | protein phosphatase 1B, magnes | <a href="#">Ppm1b</a>         | 0.888 | -1.976 | 0.0874391  | 0.284608  |
| 16559 | 10544608 |                                    |                        |                                |                               | 0.888 | -1.306 | 0.231558   | 0.502418  |
| 16560 | 10384123 | <a href="#">NM_026538</a>          | <a href="#">52513</a>  | DEAD (Asp-Glu-Ala-Asp) box pol | <a href="#">Ddx56</a>         | 0.888 | -2.234 | 0.0595062  | 0.224759  |
| 16561 | 10561527 | <a href="#">NM_021895</a>          | <a href="#">60595</a>  | actinin alpha 4                | <a href="#">Actn4</a>         | 0.888 | -2.978 | 0.0198667  | 0.109391  |
| 16562 | 10464775 | <a href="#">NM_153388</a>          | <a href="#">225875</a> | leucine rich repeat and fibron | <a href="#">Lrfn4</a>         | 0.888 | -1.539 | 0.16648    | 0.417266  |
| 16563 | 10545346 | <a href="#">NM_027275</a>          | <a href="#">69956</a>  | pentatricopeptide repeat domai | <a href="#">Ptc3</a>          | 0.888 | -2.103 | 0.0723647  | 0.253324  |
| 16564 | 10515692 | <a href="#">ENSMUST00000075406</a> | <a href="#">230676</a> | cDNA sequence BC059842         | <a href="#">BC059842</a>      | 0.888 | -1.208 | 0.265125   | 0.540213  |
| 16565 | 10359293 | <a href="#">ENSMUST00000062159</a> | <a href="#">72025</a>  | RIKEN cDNA 1600012P17 gene     | <a href="#">1600012P17Rik</a> | 0.888 | -1.259 | 0.247417   | 0.520777  |
| 16566 | 10585162 | <a href="#">BC132633</a>           | <a href="#">235327</a> | predicted gene, EG235327       | <a href="#">EG235327</a>      | 0.888 | -1.266 | 0.244737   | 0.517875  |
|       |          |                                    |                        | immunoglobulin superfamily     |                               |       |        |            |           |

|       |          |                                    |                           |                                |                                    |       |        |           |          |
|-------|----------|------------------------------------|---------------------------|--------------------------------|------------------------------------|-------|--------|-----------|----------|
| 16567 | 10517731 | <a href="#">NM_198610</a>          | <a href="#">230868</a>    | minimogrom superfamily, memb   | <a href="#">Igsf21</a>             | 0.888 | -1.642 | 0.143429  | 0.384029 |
| 16568 | 10608018 |                                    |                           |                                |                                    | 0.888 | -1.056 | 0.325179  | 0.601561 |
| 16569 | 10412100 | <a href="#">NM_011945</a>          | <a href="#">26401</a>     | mitogen-activated protein kina | <a href="#">Map3k1</a>             | 0.888 | -2.167 | 0.0657572 | 0.239101 |
| 16570 | 10383765 |                                    |                           |                                |                                    | 0.888 | -0.486 | 0.641061  | 0.837375 |
| 16571 | 10591092 | <a href="#">NM_001080814</a>       | <a href="#">270120</a>    | FAT tumor suppressor homolog 3 | <a href="#">Fat3</a>               | 0.888 | -1.705 | 0.130735  | 0.362906 |
| 16572 | 10507817 | <a href="#">NM_007559</a>          | <a href="#">12164</a>     | bone morphogenetic protein 8b  | <a href="#">Bmp8b</a>              | 0.888 | -2.391 | 0.0470578 | 0.192831 |
| 16573 | 10600210 | <a href="#">NM_133987</a>          | <a href="#">102857</a>    | solute carrier family 6 (neuro | <a href="#">Slc6a8</a>             | 0.888 | -2.178 | 0.0646721 | 0.236862 |
| 16574 | 10429555 | <a href="#">NM_025929</a>          | <a href="#">67038</a>     | RIKEN cDNA 2010109I03 gene     | <a href="#">2010109I03Rik</a>      | 0.888 | -1.84  | 0.107136  | 0.322599 |
| 16575 | 10449071 | <a href="#">NM_145999</a>          | <a href="#">214952</a>    | ras homolog gene family, membe | <a href="#">Rhot2</a>              | 0.888 | -2.856 | 0.0237117 | 0.122732 |
| 16576 | 10358999 | <a href="#">NM_011273</a>          | <a href="#">19775</a>     | xenotropic and polytropic retr | <a href="#">Xpr1</a>               | 0.888 | -2.081 | 0.0748106 | 0.258759 |
| 16577 | 10420798 | <a href="#">NM_026359</a>          | <a href="#">67750</a>     | RIKEN cDNA 4930578I06 gene     | <a href="#">4930578I06Rik</a>      | 0.888 | -1.234 | 0.256059  | 0.530431 |
| 16578 | 10386460 | <a href="#">NM_008819</a>          | <a href="#">18618</a>     | phosphatidylethanolamine N-met | <a href="#">Pemt</a>               | 0.888 | -1.142 | 0.289986  | 0.566261 |
| 16579 | 10445891 | <a href="#">ENSMUST00000039366</a> | <a href="#">211468</a>    | potassium voltage-gated channe | <a href="#">Kcnh8</a>              | 0.888 | -1.955 | 0.0902688 | 0.290067 |
| 16580 | 10367726 | <a href="#">ENSMUST00000065124</a> | <a href="#">76227</a>     | RIKEN cDNA 6530403G13 gene     | <a href="#">6530403G13Rik</a>      | 0.888 | -1.271 | 0.243049  | 0.515966 |
| 16581 | 10411728 | <a href="#">NM_021886</a>          | <a href="#">26886</a>     | centromere protein H           | <a href="#">Cenph</a>              | 0.888 | -1.868 | 0.102679  | 0.314508 |
| 16582 | 10453738 | <a href="#">NM_008058</a>          | <a href="#">14370</a>     | frizzled homolog 8 (Drosophila | <a href="#">Fzd8</a>               | 0.888 | -1.19  | 0.271886  | 0.546343 |
| 16583 | 10473576 | <a href="#">NM_001011834</a>       | <a href="#">258103</a>    | olfactory receptor 1152        | <a href="#">Olfr1152</a>           | 0.888 | -0.787 | 0.456556  | 0.712611 |
| 16584 | 10539316 | <a href="#">NM_010692</a>          | <a href="#">16815</a>     | ladybird homeobox homolog 2 (D | <a href="#">Lbx2</a>               | 0.888 | -2.486 | 0.040876  | 0.176276 |
| 16585 | 10440077 | <a href="#">NM_025599</a>          | <a href="#">66497</a>     | RIKEN cDNA 2610528E23 gene     | <a href="#">2610528E23Rik</a>      | 0.888 | -3.058 | 0.0177181 | 0.100883 |
| 16586 | 10506989 | <a href="#">NM_007983</a>          | <a href="#">14084</a>     | Fas-associated factor 1        | <a href="#">Faf1</a>               | 0.888 | -2.945 | 0.0208477 | 0.113084 |
| 16587 | 10460114 |                                    |                           |                                |                                    | 0.888 | -1.464 | 0.18525   | 0.442974 |
| 16588 | 10408709 | <a href="#">NM_025965</a>          | <a href="#">107513</a>    | signal sequence receptor, alph | <a href="#">Ssr1</a>               | 0.888 | -2.746 | 0.0278581 | 0.136762 |
| 16589 | 10594426 | <a href="#">NM_026507</a>          | <a href="#">68014</a>     | Zwilch, kinetochore associated | <a href="#">Zwilch</a>             | 0.888 | -1.473 | 0.182962  | 0.439824 |
| 16590 | 10508879 | <a href="#">NM_175307</a>          | <a href="#">100342</a>    | RIKEN cDNA 4732473B16 gene     | <a href="#">4732473B16Rik</a>      | 0.888 | -1.201 | 0.267657  | 0.542452 |
| 16591 | 10572449 | <a href="#">NM_015816</a>          | <a href="#">50783</a>     | LSM4 homolog, U6 small nuclear | <a href="#">Lsm4</a>               | 0.888 | -1.738 | 0.124604  | 0.35351  |
| 16592 | 10477122 | <a href="#">NM_176950</a>          | <a href="#">319579</a>    | defensin beta 20               | <a href="#">Defb20</a>             | 0.888 | -1.605 | 0.15132   | 0.395197 |
| 16593 | 10481682 | <a href="#">NM_177384</a>          | <a href="#">338348</a>    | tetratricopeptide repeat domai | <a href="#">Ttc16</a>              | 0.888 | -1.032 | 0.335592  | 0.611175 |
| 16594 | 10578959 |                                    |                           |                                |                                    | 0.888 | -0.57  | 0.586193  | 0.803531 |
| 16595 | 10384212 | <a href="#">NM_011709</a>          | <a href="#">22373</a>     | whey acidic protein            | <a href="#">Wap</a>                | 0.888 | -2.112 | 0.0714291 | 0.251005 |
| 16596 | 10355954 | <a href="#">BC034187</a>           | <a href="#">269211</a>    | cDNA sequence BC035947         | <a href="#">BC035947</a>           | 0.888 | -1.861 | 0.103839  | 0.31682  |
| 16597 | 10526101 | <a href="#">BC100444</a>           | <a href="#">69034</a>     | RIKEN cDNA 4930579G22 gene     | <a href="#">4930579G22Rik</a>      | 0.888 | -1.844 | 0.106493  | 0.321808 |
| 16598 | 10557628 | <a href="#">AK041042</a>           | <a href="#">654803</a>    | RIKEN cDNA B130055M24 gene     | <a href="#">B130055M24Rik</a>      | 0.888 | -1.33  | 0.224057  | 0.494207 |
| 16599 | 10520419 | <a href="#">NM_133907</a>          | <a href="#">100763</a>    | ubiquitin protein ligase E3C   | <a href="#">Ube3c</a>              | 0.888 | -2.492 | 0.0405314 | 0.175358 |
| 16600 | 10579442 | <a href="#">NM_053248</a>          | <a href="#">114479</a>    | solute carrier family 5 (sodi  | <a href="#">Slc5a5</a>             | 0.888 | -2.274 | 0.0560531 | 0.216314 |
| 16601 | 10430649 | <a href="#">NM_144811</a>          | <a href="#">52609</a>     | chromobox homolog 7            | <a href="#">Cbx7</a>               | 0.888 | -1.332 | 0.223425  | 0.493384 |
| 16602 | 10553027 | <a href="#">NM_008051</a>          | <a href="#">14343</a>     | fucosyltransferase 1           | <a href="#">Fut1</a>               | 0.888 | -1.61  | 0.150169  | 0.39328  |
| 16603 | 10385932 | <a href="#">NM_029327</a>          | <a href="#">75530</a>     | LYR motif containing 7         | <a href="#">Lym7</a>               | 0.888 | -1.657 | 0.140312  | 0.378815 |
| 16604 | 10590799 | <a href="#">ENSMUST00000054878</a> | <a href="#">77616</a>     | RIKEN cDNA C330006D17 gene     | <a href="#">C330006D17Rik</a>      | 0.888 | -1.018 | 0.341394  | 0.616096 |
| 16605 | 10455374 | <a href="#">NM_178749</a>          | <a href="#">269019</a>    | serine/threonine kinase 32A    | <a href="#">Stk32a</a>             | 0.888 | -0.352 | 0.734628  | 0.886636 |
| 16606 | 10587616 | <a href="#">NM_178738</a>          | <a href="#">244954</a>    | protease, serine, 35           | <a href="#">Prss35</a>             | 0.887 | -1.151 | 0.286625  | 0.562228 |
| 16607 | 10568696 | <a href="#">NM_001081331</a>       | <a href="#">71007</a>     | RIKEN cDNA 4933400E14 gene     | <a href="#">4933400E14Rik</a>      | 0.887 | -1.941 | 0.0921791 | 0.294263 |
| 16608 | 10430447 | <a href="#">BC068203</a>           | <a href="#">27660</a>     | RIKEN cDNA 1700088E04 gene     | <a href="#">1700088E04Rik</a>      | 0.887 | -1.629 | 0.146016  | 0.387715 |
| 16609 | 10454546 | <a href="#">NM_011946</a>          | <a href="#">26405</a>     | mitogen-activated protein kina | <a href="#">Map3k2</a>             | 0.887 | -0.892 | 0.401363  | 0.666762 |
| 16610 | 10434741 |                                    |                           |                                |                                    | 0.887 | -2.389 | 0.0472026 | 0.193141 |
| 16611 | 10351588 | <a href="#">NM_027893</a>          | <a href="#">71740</a>     | poliovirus receptor-related 4  | <a href="#">Pvrl4</a>              | 0.887 | -1.803 | 0.113198  | 0.333342 |
| 16612 | 10453634 | <a href="#">ENSMUST00000097689</a> | <a href="#">100038439</a> | predicted gene, ENSMUSG0000007 | <a href="#">ENSMUSG00000073646</a> | 0.887 | -0.998 | 0.350707  | 0.624059 |
| 16613 | 10533145 | <a href="#">NM_145853</a>          | <a href="#">252972</a>    | two pore channel 1             | <a href="#">Tpcn1</a>              | 0.887 | -1.44  | 0.191744  | 0.451028 |
| 16614 | 10498180 | <a href="#">NM_133231</a>          | <a href="#">170767</a>    | regulatory factor X-associated | <a href="#">Rfxap</a>              | 0.887 | -2.492 | 0.0405002 | 0.175263 |
| 16615 | 10406795 | <a href="#">NM_177266</a>          | <a href="#">320806</a>    | G elongation factor, mitochond | <a href="#">Gfm2</a>               | 0.887 | -2.718 | 0.0290077 | 0.140095 |

|       |          |                                    |                           |                                |                                    |       |        |           |           |
|-------|----------|------------------------------------|---------------------------|--------------------------------|------------------------------------|-------|--------|-----------|-----------|
| 16616 | 10398562 | <a href="#">NM_027149</a>          | <a href="#">69641</a>     | WD repeat domain 20a           | <a href="#">Wdr20a</a>             | 0.887 | -0.999 | 0.34999   | 0.623541  |
| 16617 | 10362426 |                                    |                           |                                |                                    | 0.887 | -0.722 | 0.49295   | 0.738744  |
| 16618 | 10459375 | <a href="#">NM_016792</a>          | <a href="#">53382</a>     | thioredoxin-like 1             | <a href="#">Txnl1</a>              | 0.887 | -3.093 | 0.0168503 | 0.0977778 |
| 16619 | 10532463 | <a href="#">NM_001025561</a>       | <a href="#">56361</a>     | pseudouridine synthase 1       | <a href="#">Pus1</a>               | 0.887 | -2.123 | 0.0702352 | 0.248316  |
| 16620 | 10473250 | <a href="#">XR_032818</a>          | <a href="#">433550</a>    | similar to mitochondrial ribos | <a href="#">LOC433550</a>          | 0.887 | -2.342 | 0.0506612 | 0.202722  |
| 16621 | 10372102 |                                    |                           |                                |                                    | 0.887 | -1.631 | 0.145722  | 0.38722   |
| 16622 | 10442030 | <a href="#">XR_032712</a>          | <a href="#">665085</a>    | similar to cyclin B            | <a href="#">LOC665085</a>          | 0.887 | -2.256 | 0.057625  | 0.220051  |
| 16623 | 10606178 | <a href="#">NR_001463</a>          | <a href="#">213742</a>    | inactive X specific transcript | <a href="#">Xist</a>               | 0.887 | -0.223 | 0.829899  | 0.931588  |
| 16624 | 10461728 | <a href="#">BC089619</a>           | <a href="#">240549</a>    | predicted gene, EG240549       | <a href="#">EG240549</a>           | 0.887 | -1.338 | 0.221658  | 0.49117   |
| 16625 | 10490569 | <a href="#">NM_010611</a>          | <a href="#">16536</a>     | potassium voltage-gated channe | <a href="#">Kcnq2</a>              | 0.887 | -1.091 | 0.310517  | 0.587103  |
| 16626 | 10587782 | <a href="#">NM_009576</a>          | <a href="#">22774</a>     | zinc finger protein of the cer | <a href="#">Zic4</a>               | 0.887 | -1.827 | 0.10918   | 0.326429  |
| 16627 | 10374181 | <a href="#">XM_001001271</a>       | <a href="#">677190</a>    | similar to SMT3 suppressor of  | <a href="#">LOC677190</a>          | 0.887 | -2.078 | 0.0750939 | 0.259103  |
| 16628 | 10417000 |                                    |                           |                                |                                    | 0.887 | -2.561 | 0.036575  | 0.163532  |
| 16629 | 10368473 |                                    |                           |                                |                                    | 0.887 | -1.235 | 0.255589  | 0.529926  |
| 16630 | 10514706 | <a href="#">ENSMUST00000051043</a> | <a href="#">242574</a>    | RIKEN cDNA C130073F10 gene     | <a href="#">C130073F10Rik</a>      | 0.887 | -2.61  | 0.0340124 | 0.156     |
| 16631 | 10448032 | <a href="#">ENSMUST00000097391</a> | <a href="#">100038481</a> | predicted gene, ENSMUSG0000007 | <a href="#">ENSMUSG00000073453</a> | 0.887 | -1.816 | 0.111028  | 0.329804  |
| 16632 | 10574880 | <a href="#">NM_024445</a>          | <a href="#">72236</a>     | translin-associated factor X ( | <a href="#">Tsnaxip1</a>           | 0.887 | -0.917 | 0.388977  | 0.657489  |
| 16633 | 10461277 | <a href="#">NM_008060</a>          | <a href="#">14376</a>     | alpha glucosidase 2 alpha neut | <a href="#">Ganab</a>              | 0.887 | -1.99  | 0.0856752 | 0.280986  |
| 16634 | 10509073 | <a href="#">NM_001085509</a>       | <a href="#">242702</a>    | myomesin family, member 3      | <a href="#">Myom3</a>              | 0.887 | -0.855 | 0.420188  | 0.682474  |
| 16635 | 10554375 | <a href="#">NM_013659</a>          | <a href="#">20352</a>     | sema domain, immunoglobulin do | <a href="#">Sema4b</a>             | 0.887 | -2.126 | 0.0699196 | 0.247718  |
| 16636 | 10590263 |                                    |                           |                                |                                    | 0.887 | -1.313 | 0.229377  | 0.500403  |
| 16637 | 10353524 | <a href="#">NM_001081079</a>       | <a href="#">70155</a>     | opioid growth factor receptor- | <a href="#">Ogfr11</a>             | 0.887 | -2.126 | 0.0699633 | 0.247831  |
| 16638 | 10514317 | <a href="#">NM_008336</a>          | <a href="#">15974</a>     | interferon alpha B             | <a href="#">Ifnab</a>              | 0.887 | -0.874 | 0.410041  | 0.674386  |
| 16639 | 10554240 | <a href="#">NM_020583</a>          | <a href="#">57444</a>     | interferon-stimulated protein  | <a href="#">Isg20</a>              | 0.887 | -1.628 | 0.146287  | 0.388044  |
| 16640 | 10390850 | <a href="#">NM_023256</a>          | <a href="#">66809</a>     | keratin 20                     | <a href="#">Krt20</a>              | 0.887 | -0.977 | 0.360366  | 0.632213  |
| 16641 | 10564692 | <a href="#">NM_023331</a>          | <a href="#">67308</a>     | mitochondrial ribosomal protei | <a href="#">Mrpl46</a>             | 0.887 | -2.264 | 0.0569157 | 0.21817   |
| 16642 | 10570280 | <a href="#">NM_010172</a>          | <a href="#">14068</a>     | coagulation factor VII         | <a href="#">F7</a>                 | 0.887 | -1.026 | 0.337981  | 0.613519  |
| 16643 | 10439303 | <a href="#">NM_013803</a>          | <a href="#">12374</a>     | calcium-sensing receptor       | <a href="#">Casr</a>               | 0.887 | -1.377 | 0.209859  | 0.47503   |
| 16644 | 10452030 | <a href="#">NM_025836</a>          | <a href="#">66905</a>     | mannose-6-phosphate receptor b | <a href="#">M6prbp1</a>            | 0.887 | -2.103 | 0.0723446 | 0.253324  |
| 16645 | 10405448 | <a href="#">NM_011392</a>          | <a href="#">20505</a>     | solute carrier family 34 (sodi | <a href="#">Slc34a1</a>            | 0.887 | -1.277 | 0.241081  | 0.513985  |
| 16646 | 10593492 | <a href="#">ENSMUST00000038822</a> | <a href="#">244871</a>    | zinc finger CCCH type containi | <a href="#">Zc3h12c</a>            | 0.887 | -2.014 | 0.0827112 | 0.275322  |
| 16647 | 10364571 | <a href="#">NM_175450</a>          | <a href="#">216156</a>    | WD repeat domain 18            | <a href="#">Wdr18</a>              | 0.887 | -1.931 | 0.0936273 | 0.296785  |
| 16648 | 10397907 | <a href="#">NM_001039049</a>       | <a href="#">75483</a>     | cytochrome c oxidase, subunit  | <a href="#">Cox8c</a>              | 0.887 | -0.606 | 0.563066  | 0.789853  |
| 16649 | 10345926 | <a href="#">BC002254</a>           | <a href="#">78896</a>     | RIKEN cDNA 1500015O10 gene     | <a href="#">1500015O10Rik</a>      | 0.886 | -2.941 | 0.020967  | 0.11338   |
| 16650 | 10435712 | <a href="#">BC131959</a>           | <a href="#">12519</a>     | CD80 antigen                   | <a href="#">Cd80</a>               | 0.886 | -1.014 | 0.343263  | 0.617382  |
| 16651 | 10569071 | <a href="#">NM_008284</a>          | <a href="#">15461</a>     | Harvey rat sarcoma virus oncog | <a href="#">Hras1</a>              | 0.886 | -2.271 | 0.0562922 | 0.216807  |
| 16652 | 10576657 |                                    |                           |                                |                                    | 0.886 | -1.2   | 0.268213  | 0.542786  |
| 16653 | 10445507 | <a href="#">ENSMUST00000095262</a> | <a href="#">224813</a>    | gene model 88, (NCBI)          | <a href="#">Gm88</a>               | 0.886 | -1.593 | 0.15393   | 0.398468  |
| 16654 | 10465215 | <a href="#">NM_020491</a>          | <a href="#">56390</a>     | Sjogren's syndrome/scleroderma | <a href="#">Sssca1</a>             | 0.886 | -2.334 | 0.0512769 | 0.204543  |
| 16655 | 10469081 | <a href="#">ENSMUST00000100443</a> | <a href="#">100038463</a> | predicted gene, ENSMUSG0000007 | <a href="#">ENSMUSG00000075547</a> | 0.886 | -1.194 | 0.270428  | 0.545253  |
| 16656 | 10564565 | <a href="#">XR_033989</a>          | <a href="#">665570</a>    | similar to LOC654472 protein   | <a href="#">LOC665570</a>          | 0.886 | -1.504 | 0.174949  | 0.42804   |
| 16657 | 10588238 | <a href="#">NM_001034892</a>       | <a href="#">434510</a>    | predicted gene, EG434510       | <a href="#">EG434510</a>           | 0.886 | -1.03  | 0.336262  | 0.611869  |
| 16658 | 10579341 | <a href="#">BC051227</a>           | <a href="#">234384</a>    | cDNA sequence BC051227         | <a href="#">BC051227</a>           | 0.886 | -2.381 | 0.0477883 | 0.194851  |
| 16659 | 10481383 | <a href="#">NM_001008498</a>       | <a href="#">71820</a>     | WD repeat domain 34            | <a href="#">Wdr34</a>              | 0.886 | -1.75  | 0.122321  | 0.349649  |
| 16660 | 10514374 | <a href="#">XR_030634</a>          | <a href="#">664886</a>    | hypothetical LOC664886         | <a href="#">LOC664886</a>          | 0.886 | -0.99  | 0.354248  | 0.626867  |
| 16661 | 10553811 |                                    |                           |                                |                                    | 0.886 | -1.941 | 0.0922145 | 0.294263  |
| 16662 | 10475456 | <a href="#">NM_001099297</a>       | <a href="#">99439</a>     | dual oxidase 1                 | <a href="#">Duox1</a>              | 0.886 | -1.08  | 0.314799  | 0.59176   |
| 16663 | 10544497 |                                    |                           |                                |                                    | 0.886 | -1.211 | 0.264065  | 0.539055  |
| 16664 | 10433311 | <a href="#">NM_029657</a>          | <a href="#">17237</a>     | mahogunin, ring finger 1       | <a href="#">Mgrn1</a>              | 0.886 | -2.091 | 0.073687  | 0.256552  |
| 16665 | 10528238 | <a href="#">NM_172992</a>          | <a href="#">68770</a>     | putative homeodomain transcrip | <a href="#">Phf2</a>               | 0.886 | -2.306 | 0.0534466 | 0.209739  |
| 16666 | 10520940 | <a href="#">NM_001081407</a>       | <a href="#">665270</a>    | phospholipase B1               | <a href="#">Plb1</a>               | 0.886 | -0.719 | 0.494978  | 0.739948  |
| 16667 | 10432571 | <a href="#">AK010113</a>           | <a href="#">70281</a>     | RIKEN cDNA 2310068J16 gene     | <a href="#">2310068J16Rik</a>      | 0.886 | -2.208 | 0.0618535 | 0.229847  |
|       |          |                                    |                           | RIKEN cDNA A730017I.22         |                                    |       |        |           |           |

|       |          |                                    |                           |                                |                               |       |        |           |           |
|-------|----------|------------------------------------|---------------------------|--------------------------------|-------------------------------|-------|--------|-----------|-----------|
| 16668 | 10487785 | <a href="#">AK166222</a>           | <a href="#">613258</a>    | gene                           | <a href="#">A730017L22Rik</a> | 0.886 | -0.982 | 0.357761  | 0.630135  |
| 16669 | 10442816 | <a href="#">NM_029624</a>          | <a href="#">76483</a>     | lipase maturation factor 1     | <a href="#">Lmf1</a>          | 0.886 | -2.076 | 0.0753461 | 0.259592  |
| 16670 | 10573610 | <a href="#">NM_001037922</a>       | <a href="#">624855</a>    | predicted gene, EG624855       | <a href="#">EG624855</a>      | 0.886 | -1.395 | 0.204485  | 0.467724  |
| 16671 | 10392856 | <a href="#">NM_025400</a>          | <a href="#">66176</a>     | NAT9                           | <a href="#">Nat9</a>          | 0.886 | -1.915 | 0.0958134 | 0.301049  |
| 16672 | 10450374 | <a href="#">L78788</a>             | <a href="#">110956</a>    | DNA segment, Chr 17, human D6S | <a href="#">D17H6S56E-5</a>   | 0.886 | -2.665 | 0.0313754 | 0.148147  |
| 16673 | 10376320 | <a href="#">NM_175001</a>          | <a href="#">216767</a>    | mitochondrial ribosomal protei | <a href="#">Mrpl22</a>        | 0.886 | -1.631 | 0.145708  | 0.38722   |
| 16674 | 10561456 | <a href="#">NM_026042</a>          | <a href="#">67224</a>     | mediator complex subunit 29    | <a href="#">Med29</a>         | 0.886 | -1.247 | 0.251393  | 0.525502  |
| 16675 | 10566138 | <a href="#">NM_020289</a>          | <a href="#">257926</a>    | olfactory receptor 544         | <a href="#">Olf544</a>        | 0.886 | -1.364 | 0.213573  | 0.479689  |
| 16676 | 10607910 | <a href="#">NM_010832</a>          | <a href="#">17692</a>     | male-specific lethal-3 homolog | <a href="#">Msl31</a>         | 0.886 | -2.464 | 0.0422397 | 0.179883  |
| 16677 | 10456587 | <a href="#">NM_027741</a>          | <a href="#">71263</a>     | Maestro                        | <a href="#">Mro</a>           | 0.886 | -0.6   | 0.566764  | 0.792465  |
| 16678 | 10539581 |                                    |                           |                                |                               | 0.886 | -1.851 | 0.105391  | 0.319942  |
| 16679 | 10565528 |                                    |                           |                                |                               | 0.886 | -1.299 | 0.234075  | 0.50534   |
| 16680 | 10358188 | <a href="#">ENSMUST00000086395</a> | <a href="#">383563</a>    | G protein-coupled receptor 25  | <a href="#">Gpr25</a>         | 0.886 | -1.391 | 0.20549   | 0.469108  |
| 16681 | 10425630 | <a href="#">BC048460</a>           | <a href="#">66346</a>     | RIKEN cDNA 1700029P11 gene     | <a href="#">1700029P11Rik</a> | 0.886 | -1.55  | 0.163721  | 0.412946  |
| 16682 | 10481380 | <a href="#">ENSMUST00000047607</a> | <a href="#">70319</a>     | RIKEN cDNA 2600006K01 gene     | <a href="#">2600006K01Rik</a> | 0.886 | -1.123 | 0.297419  | 0.573687  |
| 16683 | 10507284 | <a href="#">XR_032826</a>          | <a href="#">631400</a>    | similar to H3 histone, family  | <a href="#">LOC631400</a>     | 0.886 | -1.095 | 0.308906  | 0.58547   |
| 16684 | 10499777 | <a href="#">NM_145540</a>          | <a href="#">229543</a>    | integrator complex subunit 3   | <a href="#">Ints3</a>         | 0.886 | -2.717 | 0.0290749 | 0.140292  |
| 16685 | 10405757 | <a href="#">NM_028079</a>          | <a href="#">72061</a>     | RIKEN cDNA 2010111I01 gene     | <a href="#">2010111I01Rik</a> | 0.886 | -1.175 | 0.277212  | 0.552231  |
| 16686 | 10585390 | <a href="#">NM_025540</a>          | <a href="#">66402</a>     | sarcophilin                    | <a href="#">Sln</a>           | 0.886 | -1.356 | 0.21592   | 0.483011  |
| 16687 | 10580510 | <a href="#">NM_021390</a>          | <a href="#">58198</a>     | sal-like 1 (Drosophila)        | <a href="#">Sall1</a>         | 0.886 | -2.003 | 0.084075  | 0.278075  |
| 16688 | 10548735 | <a href="#">NM_130447</a>          | <a href="#">70686</a>     | dual specificity phosphatase 1 | <a href="#">Dusp16</a>        | 0.886 | -2.228 | 0.0600206 | 0.225894  |
| 16689 | 10432711 | <a href="#">NM_008474</a>          | <a href="#">16680</a>     | keratin 84                     | <a href="#">Krt84</a>         | 0.886 | -1.108 | 0.303606  | 0.579844  |
| 16690 | 10479596 | <a href="#">NM_001048148</a>       | <a href="#">229007</a>    | zinc finger, CCCH-type with G  | <a href="#">Zgpat</a>         | 0.886 | -2.046 | 0.0787665 | 0.267154  |
| 16691 | 10526923 | <a href="#">BC019557</a>           | <a href="#">67604</a>     | RIKEN cDNA 1110007L15 gene     | <a href="#">1110007L15Rik</a> | 0.886 | -1.3   | 0.233763  | 0.505106  |
| 16692 | 10389639 | <a href="#">NM_080420</a>          | <a href="#">76113</a>     | lactoperoxidase                | <a href="#">Lpo</a>           | 0.886 | -1.056 | 0.32519   | 0.601561  |
| 16693 | 10413979 | <a href="#">XM_985917</a>          | <a href="#">268729</a>    | gene model 626, (NCBI)         | <a href="#">Gm626</a>         | 0.886 | -0.907 | 0.393785  | 0.661649  |
| 16694 | 10504916 |                                    |                           |                                |                               | 0.886 | -1.654 | 0.140743  | 0.379507  |
| 16695 | 10606595 |                                    |                           |                                |                               | 0.885 | -0.57  | 0.585937  | 0.803231  |
| 16696 | 10569198 | <a href="#">AK149132</a>           | <a href="#">100126795</a> | hypothetical LOC100126795      | <a href="#">LOC100126795</a>  | 0.885 | -1.84  | 0.107047  | 0.322599  |
| 16697 | 10516894 | <a href="#">NM_133878</a>          | <a href="#">100088</a>    | regulator of chromosome conden | <a href="#">Rec1</a>          | 0.885 | -2.848 | 0.0239922 | 0.123827  |
| 16698 | 10459496 | <a href="#">NM_178793</a>          | <a href="#">320924</a>    | collagen and calcium binding E | <a href="#">Cebe1</a>         | 0.885 | -1.685 | 0.134589  | 0.369832  |
| 16699 | 10470950 | <a href="#">NM_007931</a>          | <a href="#">13804</a>     | endonuclease G                 | <a href="#">Endog</a>         | 0.885 | -3.304 | 0.0125024 | 0.0790998 |
| 16700 | 10598289 | <a href="#">ENSMUST00000065293</a> | <a href="#">78185</a>     | RIKEN cDNA 4930524L23 gene     | <a href="#">4930524L23Rik</a> | 0.885 | -0.785 | 0.457397  | 0.713005  |
| 16701 | 10580300 | <a href="#">NM_019652</a>          | <a href="#">56495</a>     | arsA (bacterial) arsenite tran | <a href="#">Asna1</a>         | 0.885 | -2.562 | 0.0365116 | 0.163455  |
| 16702 | 10375730 |                                    |                           |                                |                               | 0.885 | -0.712 | 0.498726  | 0.742429  |
| 16703 | 10584526 | <a href="#">NM_146854</a>          | <a href="#">258853</a>    | olfactory receptor 982         | <a href="#">Olf982</a>        | 0.885 | -1.089 | 0.31113   | 0.587683  |
| 16704 | 10412417 | <a href="#">ENSMUST00000099148</a> | <a href="#">67304</a>     | RIKEN cDNA 3110070M22 gene     | <a href="#">3110070M22Rik</a> | 0.885 | -1.326 | 0.225214  | 0.49531   |
| 16705 | 10481312 | <a href="#">NM_027283</a>          | <a href="#">69987</a>     | RIKEN cDNA 1700026L06 gene     | <a href="#">1700026L06Rik</a> | 0.885 | -1.737 | 0.124769  | 0.353539  |
| 16706 | 10378088 | <a href="#">NM_016776</a>          | <a href="#">18432</a>     | MYB binding protein (P160) 1a  | <a href="#">Mybbp1a</a>       | 0.885 | -1.977 | 0.0873134 | 0.284457  |
| 16707 | 10354411 |                                    |                           |                                |                               | 0.885 | -1.358 | 0.215321  | 0.482386  |
| 16708 | 10356710 | <a href="#">ENSMUST00000097638</a> | <a href="#">100037260</a> | RIKEN cDNA 9430060I03 gene     | <a href="#">9430060I03Rik</a> | 0.885 | -1.244 | 0.252458  | 0.526583  |
| 16709 | 10380411 | <a href="#">NM_053161</a>          | <a href="#">94064</a>     | mitochondrial ribosomal protei | <a href="#">Mrpl27</a>        | 0.885 | -2.055 | 0.0777398 | 0.265118  |
| 16710 | 10364494 | <a href="#">NM_031380</a>          | <a href="#">83554</a>     | folliculin-like 3              | <a href="#">Fstl3</a>         | 0.885 | -1.272 | 0.242972  | 0.51587   |
| 16711 | 10407431 | <a href="#">NM_031250</a>          | <a href="#">83428</a>     | urocortin 3                    | <a href="#">Ucn3</a>          | 0.885 | -1.2   | 0.268027  | 0.542786  |
| 16712 | 10360538 |                                    |                           |                                |                               | 0.885 | -0.77  | 0.465845  | 0.719391  |
| 16713 | 10596940 | <a href="#">NM_028944</a>          | <a href="#">74443</a>     | RIKEN cDNA 4933406E20 gene     | <a href="#">4933406E20Rik</a> | 0.885 | -1.297 | 0.234606  | 0.505768  |
| 16714 | 10353989 |                                    |                           |                                |                               | 0.885 | -1.609 | 0.150454  | 0.393664  |
| 16715 | 10554150 | <a href="#">NM_177740</a>          | <a href="#">244058</a>    | RGM domain family, member A    | <a href="#">Rgma</a>          | 0.885 | -1.579 | 0.157191  | 0.40365   |
| 16716 | 10368886 | <a href="#">ENSMUST00000105502</a> | <a href="#">56484</a>     | forkhead box O3a               | <a href="#">Foxo3a</a>        | 0.885 | -1.409 | 0.200592  | 0.462553  |
| 16717 | 10413615 | <a href="#">NM_018746</a>          | <a href="#">16427</a>     | inter alpha-trypsin inhibitor, | <a href="#">Itih4</a>         | 0.885 | -1.28  | 0.24024   | 0.513302  |
| 16718 | 10528911 |                                    |                           |                                |                               | 0.885 | -2.401 | 0.0464083 | 0.191502  |
| 16719 | 10487700 | <a href="#">NM_197945</a>          | <a href="#">241638</a>    | ProSAPiP1 protein              | <a href="#">RP23-100C5.8</a>  | 0.885 | -0.984 | 0.3568    | 0.629197  |
| 16720 | 10551542 | <a href="#">NM_015796</a>          | <a href="#">50760</a>     | F-box protein 17               | <a href="#">Fbxo17</a>        | 0.885 | -2.286 | 0.0550273 | 0.214036  |
| 16721 | 10559146 | <a href="#">NM_029426</a>          | <a href="#">75770</a>     | BR serine/threonine kinase 2   | <a href="#">Brsk2</a>         | 0.885 | -1.461 | 0.186236  | 0.444444  |
| 16722 | 10426160 | <a href="#">NM_028690</a>          | <a href="#">72016</a>     | interleukin transport 57 ha    | <a href="#">Ilt57</a>         | 0.885 | -2.100 | 0.0164570 | 0.006282  |

|       |          |                                    |                           |                                |                                    |       |        |           |           |
|-------|----------|------------------------------------|---------------------------|--------------------------------|------------------------------------|-------|--------|-----------|-----------|
| 16722 | 10450109 | <a href="#">NM_028880</a>          | <a href="#">75210</a>     | intragenic transport 57 no     | <a href="#">Hh37</a>               | 0.885 | -3.109 | 0.0104379 | 0.0902885 |
| 16723 | 10582821 |                                    |                           |                                |                                    | 0.885 | -0.863 | 0.415923  | 0.679095  |
| 16724 | 10480649 | <a href="#">BC117777</a>           | <a href="#">67859</a>     | RIKEN cDNA 2310002J15 gene     | <a href="#">2310002J15Rik</a>      | 0.885 | -1.219 | 0.261067  | 0.535632  |
| 16725 | 10596303 | <a href="#">NM_019807</a>          | <a href="#">56318</a>     | acid phosphatase, prostate     | <a href="#">Acpp</a>               | 0.885 | -2.423 | 0.0448731 | 0.187435  |
| 16726 | 10451248 | <a href="#">NM_028751</a>          | <a href="#">74094</a>     | tight junction associated prot | <a href="#">Tjap1</a>              | 0.885 | -1.792 | 0.114927  | 0.337218  |
| 16727 | 10375027 | <a href="#">XR_033651</a>          | <a href="#">669207</a>    | similar to hCG2016250          | <a href="#">LOC669207</a>          | 0.885 | -1.588 | 0.155098  | 0.400513  |
| 16728 | 10575249 | <a href="#">NM_175646</a>          | <a href="#">234723</a>    | thioredoxin-like 4B            | <a href="#">Txnl4b</a>             | 0.885 | -2.116 | 0.0709545 | 0.250127  |
| 16729 | 10558866 | <a href="#">NM_007878</a>          | <a href="#">13491</a>     | dopamine receptor 4            | <a href="#">Drd4</a>               | 0.885 | -1.329 | 0.224293  | 0.494263  |
| 16730 | 10420935 | <a href="#">NM_007940</a>          | <a href="#">13850</a>     | epoxide hydrolase 2, cytoplasm | <a href="#">Ephx2</a>              | 0.885 | -0.757 | 0.472865  | 0.724458  |
| 16731 | 10554960 | <a href="#">NM_021427</a>          | <a href="#">58238</a>     | RIKEN cDNA A830059I20 gene     | <a href="#">A830059I20Rik</a>      | 0.885 | -2.628 | 0.0331394 | 0.153511  |
| 16732 | 10383932 | <a href="#">NM_030228</a>          | <a href="#">78926</a>     | growth arrest-specific 2 like  | <a href="#">Gas2l1</a>             | 0.885 | -2.033 | 0.0804034 | 0.270493  |
| 16733 | 10598111 | <a href="#">NM_001033326</a>       | <a href="#">236082</a>    | dehydrogenase/reductase (SDR f | <a href="#">Dhrsx</a>              | 0.885 | -1.504 | 0.174935  | 0.42804   |
| 16734 | 10510908 |                                    |                           |                                |                                    | 0.885 | -0.639 | 0.542703  | 0.775122  |
| 16735 | 10500976 | <a href="#">NM_145541</a>          | <a href="#">109905</a>    | RAS-related protein-1a         | <a href="#">Rap1a</a>              | 0.885 | -1.957 | 0.0900033 | 0.289452  |
| 16736 | 10471778 | <a href="#">NM_001005569</a>       | <a href="#">236509</a>    | olfactory receptor 366         | <a href="#">Olfr366</a>            | 0.885 | -1.221 | 0.260442  | 0.53495   |
| 16737 | 10560217 | <a href="#">NM_027883</a>          | <a href="#">71723</a>     | DEAH (Asp-Glu-Ala-His) box pol | <a href="#">Dhx34</a>              | 0.885 | -2.671 | 0.0310916 | 0.147201  |
| 16738 | 10595657 | <a href="#">AF529169</a>           | <a href="#">209743</a>    | cDNA sequence AF529169         | <a href="#">AF529169</a>           | 0.884 | -1.709 | 0.129933  | 0.361535  |
| 16739 | 10510053 | <a href="#">ENSMUST00000052458</a> | <a href="#">242735</a>    | leucine rich repeat containing | <a href="#">Lrrc38</a>             | 0.884 | -1.779 | 0.11724   | 0.341261  |
| 16740 | 10373740 | <a href="#">NM_178149</a>          | <a href="#">216505</a>    | phosphoinositide-3-kinase inte | <a href="#">Pik3ip1</a>            | 0.884 | -1.49  | 0.178489  | 0.433342  |
| 16741 | 10530733 | <a href="#">NM_007715</a>          | <a href="#">12753</a>     | circadian locomoter output cyc | <a href="#">Clock</a>              | 0.884 | -2.424 | 0.0448364 | 0.187319  |
| 16742 | 10581917 | <a href="#">BC100402</a>           | <a href="#">234740</a>    | RIKEN cDNA 4932417I16 gene     | <a href="#">4932417I16Rik</a>      | 0.884 | -1.355 | 0.216474  | 0.483687  |
| 16743 | 10549708 | <a href="#">ENSMUST00000013235</a> | <a href="#">78052</a>     | transmembrane protein 190      | <a href="#">Tmem190</a>            | 0.884 | -0.897 | 0.398519  | 0.664744  |
| 16744 | 10402650 | <a href="#">NM_026048</a>          | <a href="#">67236</a>     | RIKEN cDNA 2810452K22          | <a href="#">2810452K22Rik</a>      | 0.884 | -2.415 | 0.045395  | 0.188572  |
| 16745 | 10345552 | <a href="#">XR_032810</a>          | <a href="#">100046859</a> | hypothetical protein LOC100046 | <a href="#">LOC100046859</a>       | 0.884 | -1.279 | 0.240497  | 0.513583  |
| 16746 | 10515363 | <a href="#">NM_025962</a>          | <a href="#">67096</a>     | methylmalonic aciduria cblC ty | <a href="#">Mmache</a>             | 0.884 | -2.127 | 0.0697822 | 0.247552  |
| 16747 | 10416082 | <a href="#">NM_029979</a>          | <a href="#">66854</a>     | tripartite motif-containing 35 | <a href="#">Trim35</a>             | 0.884 | -2.282 | 0.0554258 | 0.214756  |
| 16748 | 10417605 | <a href="#">NM_010210</a>          | <a href="#">14198</a>     | fragile histidine triad gene   | <a href="#">Fhit</a>               | 0.884 | -1.296 | 0.234955  | 0.506303  |
| 16749 | 10365204 | <a href="#">ENSMUST00000099432</a> | <a href="#">100038681</a> | predicted gene, ENSMUSG0000007 | <a href="#">ENSMUSG00000074855</a> | 0.884 | -0.493 | 0.636691  | 0.834887  |
| 16750 | 10385826 | <a href="#">NM_183173</a>          | <a href="#">237761</a>    | ankyrin repeat domain 43       | <a href="#">Ankrd43</a>            | 0.884 | -1.63  | 0.145821  | 0.387343  |
| 16751 | 10585097 | <a href="#">BC011344</a>           | <a href="#">434402</a>    | predicted gene, EG434402       | <a href="#">EG434402</a>           | 0.884 | -1.838 | 0.107448  | 0.323077  |
| 16752 | 10568480 | <a href="#">ENSMUST00000035253</a> | <a href="#">67872</a>     | non-SMC element 4 homolog A (S | <a href="#">Nsmce4a</a>            | 0.884 | -2.939 | 0.0210201 | 0.113467  |
| 16753 | 10437940 |                                    |                           |                                |                                    | 0.884 | -1.221 | 0.260558  | 0.535075  |
| 16754 | 10527115 | <a href="#">NM_172725</a>          | <a href="#">231855</a>    | RIKEN cDNA C330006K01 gene     | <a href="#">C330006K01Rik</a>      | 0.884 | -1.906 | 0.0971476 | 0.303538  |
| 16755 | 10406898 | <a href="#">NM_027592</a>          | <a href="#">108143</a>    | TAF9 RNA polymerase II, TATA b | <a href="#">Taf9</a>               | 0.884 | -2.99  | 0.0195444 | 0.108095  |
| 16756 | 10551905 | <a href="#">ENSMUST00000098579</a> | <a href="#">54631</a>     | nephrosis 1 homolog, nephrin ( | <a href="#">Nphs1</a>              | 0.884 | -2.06  | 0.0772299 | 0.263762  |
| 16757 | 10556295 | <a href="#">XR_033117</a>          | <a href="#">668368</a>    | predicted gene, EG668368       | <a href="#">EG668368</a>           | 0.884 | -1.317 | 0.228085  | 0.499133  |
| 16758 | 10471419 | <a href="#">NM_194335</a>          | <a href="#">71254</a>     | nuclear apoptosis inducing fac | <a href="#">Naif1</a>              | 0.884 | -2.566 | 0.0362888 | 0.162734  |
| 16759 | 10447521 | <a href="#">NM_146074</a>          | <a href="#">224481</a>    | transcription factor B1, mitoc | <a href="#">Tfblm</a>              | 0.884 | -2.608 | 0.0341167 | 0.156257  |
| 16760 | 10545177 |                                    |                           |                                |                                    | 0.884 | -1.135 | 0.292553  | 0.568731  |
| 16761 | 10423503 | <a href="#">XM_890363</a>          | <a href="#">625796</a>    | predicted gene, EG625796       | <a href="#">EG625796</a>           | 0.884 | -1.061 | 0.323129  | 0.59983   |
| 16762 | 10464285 | <a href="#">XR_031070</a>          | <a href="#">100044901</a> | similar to ribosomal protein L | <a href="#">LOC100044901</a>       | 0.884 | -1.645 | 0.14279   | 0.382897  |
| 16763 | 10348240 | <a href="#">BC115669</a>           | <a href="#">73234</a>     | RIKEN cDNA 3110079O15 gene     | <a href="#">3110079O15Rik</a>      | 0.884 | -1.152 | 0.286011  | 0.561602  |
| 16764 | 10555059 | <a href="#">NM_001012434</a>       | <a href="#">233529</a>    | potassium channel tetramerisat | <a href="#">Kctd14</a>             | 0.884 | -0.767 | 0.467677  | 0.720331  |
| 16765 | 10401511 | <a href="#">NM_001033334</a>       | <a href="#">627191</a>    | transmembrane protein 90a      | <a href="#">Tmem90a</a>            | 0.884 | -0.748 | 0.478173  | 0.728737  |
| 16766 | 10352798 | <a href="#">NM_010600</a>          | <a href="#">16510</a>     | potassium voltage-gated channe | <a href="#">Kcnh1</a>              | 0.884 | -2.165 | 0.0659354 | 0.239542  |
| 16767 | 10426643 | <a href="#">AK157795</a>           | <a href="#">100049164</a> | predicted gene, ENSMUSG0000007 | <a href="#">ENSMUSG00000075423</a> | 0.884 | -1.522 | 0.170545  | 0.422248  |
| 16768 | 10353934 | <a href="#">NM_146107</a>          | <a href="#">226977</a>    | ARPI actin-related protein 1 h | <a href="#">Actr1b</a>             | 0.884 | -2.09  | 0.0738158 | 0.256746  |
| 16769 | 10567739 | <a href="#">ENSMUST00000061823</a> | <a href="#">71208</a>     | RIKEN cDNA 4933440M02 gene     | <a href="#">4933440M02Rik</a>      | 0.884 | -1.099 | 0.306934  | 0.583565  |
| 16770 | 10395158 | <a href="#">ENSMUST00000101508</a> | <a href="#">432645</a>    | RIKEN cDNA 6030469F06 gene     | <a href="#">6030469F06Rik</a>      | 0.884 | -1.043 | 0.330467  | 0.606651  |
| 16771 | 10487453 | <a href="#">NM_016902</a>          | <a href="#">53885</a>     | nebronphthisis 1 (juvenile)    | <a href="#">Nbnl</a>               | 0.884 | -2.977 | 0.0200304 | 0.109976  |

|       |          |                                    |                           |                                |                                    |       |        |           |           |
|-------|----------|------------------------------------|---------------------------|--------------------------------|------------------------------------|-------|--------|-----------|-----------|
| 16772 | 10589798 |                                    |                           |                                |                                    | 0.884 | -1.455 | 0.187799  | 0.446159  |
| 16773 | 10535725 | <a href="#">NM_028774</a>          | <a href="#">74132</a>     | ring finger protein (C3H2C3 ty | <a href="#">Rnf6</a>               | 0.884 | -2.039 | 0.0795946 | 0.268799  |
| 16774 | 10540118 | <a href="#">NM_026309</a>          | <a href="#">67678</a>     | LSM3 homolog, U6 small nuclear | <a href="#">Lsm3</a>               | 0.884 | -2.691 | 0.030166  | 0.144371  |
| 16775 | 10432152 | <a href="#">NM_146281</a>          | <a href="#">258278</a>    | olfactory receptor 284         | <a href="#">Olf284</a>             | 0.884 | -1.147 | 0.28816   | 0.563996  |
| 16776 | 10408197 | <a href="#">NM_178197</a>          | <a href="#">319182</a>    | histone cluster 1, H2bh        | <a href="#">Hist1h2bh</a>          | 0.884 | -2.507 | 0.039626  | 0.172895  |
| 16777 | 10433633 | <a href="#">NM_181860</a>          | <a href="#">239719</a>    | MKL/myocardin-like 2           | <a href="#">Mkl2</a>               | 0.884 | -1.819 | 0.110453  | 0.328752  |
| 16778 | 10496864 | <a href="#">ENSMUST00000092878</a> | <a href="#">381483</a>    | predicted gene, EG381483       | <a href="#">EG381483</a>           | 0.884 | -1.973 | 0.0878221 | 0.285415  |
| 16779 | 10594404 | <a href="#">NM_016769</a>          | <a href="#">17127</a>     | MAD homolog 3 (Drosophila)     | <a href="#">Smad3</a>              | 0.884 | -1.76  | 0.12061   | 0.347059  |
| 16780 | 10539042 | <a href="#">NM_009088</a>          | <a href="#">20019</a>     | RNA polymerase 1-4             | <a href="#">Rpo1-4</a>             | 0.884 | -2.334 | 0.0512859 | 0.204543  |
| 16781 | 10426812 | <a href="#">NM_010271</a>          | <a href="#">14555</a>     | glycerol-3-phosphate dehydroge | <a href="#">Gpd1</a>               | 0.884 | -1.134 | 0.293025  | 0.56904   |
| 16782 | 10495218 | <a href="#">NM_007441</a>          | <a href="#">11694</a>     | aristaless 3                   | <a href="#">Alx3</a>               | 0.883 | -1.173 | 0.27822   | 0.553196  |
| 16783 | 10528457 | <a href="#">NM_011959</a>          | <a href="#">26429</a>     | origin recognition complex, su | <a href="#">Orc5l</a>              | 0.883 | -2.24  | 0.0589389 | 0.223414  |
| 16784 | 10432675 | <a href="#">ENSMUST00000089252</a> | <a href="#">619313</a>    | RIKEN cDNA I730030J21 gene     | <a href="#">I730030J21Rik</a>      | 0.883 | -0.93  | 0.38253   | 0.65196   |
| 16785 | 10596433 | <a href="#">NM_174846</a>          | <a href="#">235582</a>    | glycerate kinase               | <a href="#">Glyctk</a>             | 0.883 | -2.282 | 0.055388  | 0.214688  |
| 16786 | 10596747 | <a href="#">NM_011349</a>          | <a href="#">20350</a>     | sema domain, immunoglobulin do | <a href="#">Sema3f</a>             | 0.883 | -2.943 | 0.0208953 | 0.113256  |
| 16787 | 10430846 | <a href="#">NM_025987</a>          | <a href="#">67130</a>     | NADH dehydrogenase (ubiquinone | <a href="#">Ndufa6</a>             | 0.883 | -1.863 | 0.103562  | 0.316379  |
| 16788 | 10589076 | <a href="#">NM_020520</a>          | <a href="#">57279</a>     | solute carrier family 25 (mito | <a href="#">Slc25a20</a>           | 0.883 | -1.736 | 0.124941  | 0.353886  |
| 16789 | 10574765 | <a href="#">NM_001033371</a>       | <a href="#">270091</a>    | leucine rich repeat containing | <a href="#">Lrrc36</a>             | 0.883 | -1.764 | 0.119762  | 0.346027  |
| 16790 | 10392904 | <a href="#">NM_176847</a>          | <a href="#">16470</a>     | Usher syndrome 1G homolog (hum | <a href="#">Ush1g</a>              | 0.883 | -1.513 | 0.172746  | 0.425061  |
| 16791 | 10507137 | <a href="#">NM_026018</a>          | <a href="#">67182</a>     | PDZK1 interacting protein 1    | <a href="#">Pdzk1ip1</a>           | 0.883 | -0.86  | 0.417567  | 0.680361  |
| 16792 | 10576967 | <a href="#">ENSMUST00000040608</a> | <a href="#">74027</a>     | RIKEN cDNA 3930402G23 gene     | <a href="#">3930402G23Rik</a>      | 0.883 | -1.717 | 0.128343  | 0.359238  |
| 16793 | 10415832 | <a href="#">NM_001039125</a>       | <a href="#">654465</a>    | predicted gene, EG654465       | <a href="#">EG654465</a>           | 0.883 | -0.99  | 0.354276  | 0.626867  |
| 16794 | 10593918 | <a href="#">NM_176831</a>          | <a href="#">66812</a>     | phosphopantothenoylcysteine de | <a href="#">Ppcdc</a>              | 0.883 | -2.693 | 0.0300838 | 0.144075  |
| 16795 | 10582823 | <a href="#">NM_172762</a>          | <a href="#">52202</a>     | RNA binding motif protein 34   | <a href="#">Rbm34</a>              | 0.883 | -3.37  | 0.0114095 | 0.0742122 |
| 16796 | 10508454 | <a href="#">NM_133889</a>          | <a href="#">100383</a>    | BSD domain containing 1        | <a href="#">Bsdcl</a>              | 0.883 | -1.929 | 0.0938188 | 0.297184  |
| 16797 | 10467115 | <a href="#">NM_024204</a>          | <a href="#">52024</a>     | ankyrin repeat domain 22       | <a href="#">Ankrd22</a>            | 0.883 | -0.614 | 0.557855  | 0.785788  |
| 16798 | 10359697 | <a href="#">NM_008510</a>          | <a href="#">16963</a>     | chemokine (C motif) ligand 1   | <a href="#">Xcl1</a>               | 0.883 | -1.692 | 0.133135  | 0.367016  |
| 16799 | 10601857 | <a href="#">NM_009750</a>          | <a href="#">12070</a>     | nerve growth factor receptor ( | <a href="#">Ngfrap1</a>            | 0.883 | -2.785 | 0.0262908 | 0.131448  |
| 16800 | 10405287 | <a href="#">NM_025933</a>          | <a href="#">67044</a>     | HIG1 domain family, member 2A  | <a href="#">Higd2a</a>             | 0.883 | -1.977 | 0.087345  | 0.284457  |
| 16801 | 10385761 | <a href="#">NM_009458</a>          | <a href="#">22210</a>     | ubiquitin-conjugating enzyme E | <a href="#">Ube2b</a>              | 0.883 | -2.938 | 0.0210555 | 0.113586  |
| 16802 | 10455048 | <a href="#">NM_053126</a>          | <a href="#">93872</a>     | protocadherin beta 1           | <a href="#">Pcdhb1</a>             | 0.883 | -1.132 | 0.29369   | 0.569705  |
| 16803 | 10386115 |                                    |                           |                                |                                    | 0.883 | -1.913 | 0.0961698 | 0.301828  |
| 16804 | 10430834 | <a href="#">NM_008669</a>          | <a href="#">17939</a>     | N-acetyl galactosaminidase, al | <a href="#">Naga</a>               | 0.883 | -1.774 | 0.11813   | 0.343095  |
| 16805 | 10528615 | <a href="#">ENSMUST00000101490</a> | <a href="#">100038444</a> | predicted gene, ENSMUSG0000007 | <a href="#">ENSMUSG00000073129</a> | 0.883 | -1.133 | 0.293388  | 0.569485  |
| 16806 | 10497505 | <a href="#">NM_138666</a>          | <a href="#">192167</a>    | neuroligin 1                   | <a href="#">Nlgn1</a>              | 0.883 | -0.699 | 0.506671  | 0.748536  |
| 16807 | 10517616 | <a href="#">BC132477</a>           | <a href="#">75718</a>     | RIKEN cDNA 4931403E03 gene     | <a href="#">4931403E03Rik</a>      | 0.883 | -1.353 | 0.216846  | 0.484361  |
| 16808 | 10484925 | <a href="#">XM_205095</a>          | <a href="#">279067</a>    | similar to acidic ribosomal ph | <a href="#">LOC279067</a>          | 0.883 | -1.93  | 0.0937181 | 0.29698   |
| 16809 | 10458349 | <a href="#">NM_025291</a>          | <a href="#">24068</a>     | steroid receptor RNA activator | <a href="#">Sra1</a>               | 0.883 | -1.887 | 0.0999516 | 0.309064  |
| 16810 | 10510882 | <a href="#">ENSMUST00000071251</a> | <a href="#">230971</a>    | multiple EGF-like-domains 6    | <a href="#">Megf6</a>              | 0.883 | -1.565 | 0.160268  | 0.407592  |
| 16811 | 10520040 | <a href="#">ENSMUST00000084713</a> | <a href="#">100038682</a> | predicted gene, ENSMUSG0000007 | <a href="#">ENSMUSG00000073152</a> | 0.883 | -1.357 | 0.21561   | 0.482777  |
| 16812 | 10472893 | <a href="#">NM_023057</a>          | <a href="#">65964</a>     | RIKEN cDNA B230120H23 gene     | <a href="#">B230120H23Rik</a>      | 0.883 | -1.144 | 0.289328  | 0.565289  |
| 16813 | 10523750 | <a href="#">BC023132</a>           | <a href="#">100662</a>    | RIKEN cDNA D930016D06 gene     | <a href="#">D930016D06Rik</a>      | 0.883 | -2.547 | 0.0373119 | 0.166124  |
| 16814 | 10580467 | <a href="#">ENSMUST00000098528</a> | <a href="#">100038706</a> | predicted gene, ENSMUSG0000007 | <a href="#">ENSMUSG00000074176</a> | 0.883 | -1.533 | 0.167809  | 0.419086  |
| 16815 | 10473737 | <a href="#">NM_019758</a>          | <a href="#">56428</a>     | mitochondrial carrier homolog  | <a href="#">Mtch2</a>              | 0.883 | -2.474 | 0.0415928 | 0.177907  |
| 16816 | 10547056 | <a href="#">NM_144805</a>          | <a href="#">94346</a>     | transmembrane protein 40       | <a href="#">Tmem40</a>             | 0.883 | -1.682 | 0.135275  | 0.370739  |
| 16817 | 10415090 | <a href="#">AK006648</a>           | <a href="#">239096</a>    | cadherin-like 24               | <a href="#">Cdh24</a>              | 0.883 | -1.118 | 0.299359  | 0.575422  |
| 16818 | 10438515 | <a href="#">AK149512</a>           | <a href="#">100038507</a> | predicted gene, ENSMUSG0000007 | <a href="#">ENSMUSG00000075326</a> | 0.883 | -1.822 | 0.11002   | 0.328028  |

|       |          |                                    |                           |                                |                                    |       |        |           |           |
|-------|----------|------------------------------------|---------------------------|--------------------------------|------------------------------------|-------|--------|-----------|-----------|
| 16819 | 10398025 | <a href="#">BC063325</a>           | <a href="#">74069</a>     | serine (or cysteine) peptidase | <a href="#">Serpina3a</a>          | 0.883 | -0.803 | 0.447616  | 0.705227  |
| 16820 | 10574595 |                                    |                           |                                |                                    | 0.883 | -1.938 | 0.0926111 | 0.294729  |
| 16821 | 10466410 | <a href="#">NM_177420</a>          | <a href="#">107272</a>    | phosphoserine aminotransferase | <a href="#">Psat1</a>              | 0.883 | -2.42  | 0.0450579 | 0.187761  |
| 16822 | 10396372 | <a href="#">NM_008612</a>          | <a href="#">17420</a>     | menage a trois 1               | <a href="#">Mnat1</a>              | 0.882 | -3.083 | 0.0170964 | 0.0987125 |
| 16823 | 10387651 | <a href="#">NM_175368</a>          | <a href="#">108803</a>    | RIKEN cDNA 4933402P03 gene     | <a href="#">4933402P03Rik</a>      | 0.882 | -1.758 | 0.120905  | 0.347273  |
| 16824 | 10429908 | <a href="#">NM_013481</a>          | <a href="#">12181</a>     | block of proliferation 1       | <a href="#">Bop1</a>               | 0.882 | -1.787 | 0.11576   | 0.338351  |
| 16825 | 10597871 | <a href="#">NM_019814</a>          | <a href="#">56295</a>     | HIG1 domain family, member 1A  | <a href="#">Higd1a</a>             | 0.882 | -1.079 | 0.315222  | 0.592133  |
| 16826 | 10458760 | <a href="#">XR_032774</a>          | <a href="#">225457</a>    | hypothetical gene supported by | <a href="#">LOC225457</a>          | 0.882 | -1.144 | 0.289247  | 0.565183  |
| 16827 | 10442375 | <a href="#">NM_001077633</a>       | <a href="#">620253</a>    | demilune cell and parotid prot | <a href="#">Depp3</a>              | 0.882 | -0.428 | 0.681192  | 0.858913  |
| 16828 | 10500469 | <a href="#">NM_001039376</a>       | <a href="#">83679</a>     | phosphodiesterase 4D interacti | <a href="#">Pde4dip</a>            | 0.882 | -2.785 | 0.0263104 | 0.131515  |
| 16829 | 10547153 | <a href="#">NM_009662</a>          | <a href="#">11689</a>     | arachidonate 5-lipoxygenase    | <a href="#">Alox5</a>              | 0.882 | -1.047 | 0.328854  | 0.605213  |
| 16830 | 10605784 |                                    |                           |                                |                                    | 0.882 | -1.843 | 0.106626  | 0.32207   |
| 16831 | 10459835 |                                    |                           |                                |                                    | 0.882 | -1.646 | 0.142467  | 0.38247   |
| 16832 | 10377938 | <a href="#">NM_007933</a>          | <a href="#">13808</a>     | enolase 3, beta muscle         | <a href="#">Eno3</a>               | 0.882 | -2.104 | 0.0723067 | 0.253289  |
| 16833 | 10460312 | <a href="#">NM_026373</a>          | <a href="#">52004</a>     | CDK2-associated protein 2      | <a href="#">Cdk2ap2</a>            | 0.882 | -2.814 | 0.0252049 | 0.128059  |
| 16834 | 10436182 | <a href="#">NM_010581</a>          | <a href="#">16423</a>     | CD47 antigen (Rh-related antig | <a href="#">Cd47</a>               | 0.882 | -1.626 | 0.146747  | 0.388752  |
| 16835 | 10407120 | <a href="#">BC084675</a>           | <a href="#">20091</a>     | ribosomal protein S3a          | <a href="#">Rps3a</a>              | 0.882 | -1.92  | 0.0950633 | 0.299747  |
| 16836 | 10401166 | <a href="#">NM_029988</a>          | <a href="#">110417</a>    | phosphatidylinositol glycan an | <a href="#">Pigh</a>               | 0.882 | -2.246 | 0.0584339 | 0.222137  |
| 16837 | 10553403 | <a href="#">NM_016865</a>          | <a href="#">53415</a>     | HIV-1 tat interactive protein  | <a href="#">Htatip2</a>            | 0.882 | -1.174 | 0.277695  | 0.552827  |
| 16838 | 10435193 | <a href="#">NM_172823</a>          | <a href="#">239833</a>    | leishmanolysin-like (metallope | <a href="#">Lmln</a>               | 0.882 | -2.008 | 0.0834176 | 0.276541  |
| 16839 | 10491066 | <a href="#">ENSMUST00000099182</a> | <a href="#">100045726</a> | hypothetical protein LOC100045 | <a href="#">LOC100045726</a>       | 0.882 | -1.638 | 0.14414   | 0.385253  |
| 16840 | 10578685 |                                    |                           |                                |                                    | 0.882 | -1.327 | 0.224961  | 0.494961  |
| 16841 | 10414288 | <a href="#">NM_025959</a>          | <a href="#">67089</a>     | proteasome (prosome, macropain | <a href="#">Psmc6</a>              | 0.882 | -2.609 | 0.0340779 | 0.156165  |
| 16842 | 10462330 | <a href="#">NM_028922</a>          | <a href="#">74411</a>     | phosphatidic acid phosphatase  | <a href="#">Ppapdc2</a>            | 0.882 | -2.728 | 0.028606  | 0.138854  |
| 16843 | 10554704 | <a href="#">NM_023403</a>          | <a href="#">67943</a>     | mesoderm development candidate | <a href="#">Mesdc2</a>             | 0.882 | -2.872 | 0.0231831 | 0.120967  |
| 16844 | 10499939 | <a href="#">XM_001478521</a>       | <a href="#">631101</a>    | hypothetical LOC631101         | <a href="#">LOC631101</a>          | 0.882 | -1.535 | 0.167371  | 0.418358  |
| 16845 | 10519711 |                                    |                           |                                |                                    | 0.882 | -1.285 | 0.238528  | 0.511194  |
| 16846 | 10584194 | <a href="#">NM_026130</a>          | <a href="#">67398</a>     | signal recognition particle re | <a href="#">Srpr</a>               | 0.882 | -2.157 | 0.0667975 | 0.24144   |
| 16847 | 10604111 | <a href="#">NM_001025084</a>       | <a href="#">385343</a>    | reproductive homeobox 1        | <a href="#">Rhox1</a>              | 0.882 | -1.228 | 0.257897  | 0.531958  |
| 16848 | 10552173 | <a href="#">NM_028120</a>          | <a href="#">72140</a>     | coiled-coil domain containing  | <a href="#">Ccdc123</a>            | 0.882 | -2.315 | 0.0526889 | 0.207807  |
| 16849 | 10589541 | <a href="#">NM_010628</a>          | <a href="#">16578</a>     | kinesin family member 9        | <a href="#">Kif9</a>               | 0.882 | -1.673 | 0.13704   | 0.373617  |
| 16850 | 10472501 | <a href="#">NM_172856</a>          | <a href="#">241447</a>    | LAG1 homolog, ceramide synthas | <a href="#">Lass6</a>              | 0.882 | -2.757 | 0.0274153 | 0.135184  |
| 16851 | 10592891 | <a href="#">NM_153537</a>          | <a href="#">102693</a>    | pleckstrin homology-like domai | <a href="#">Phldb1</a>             | 0.882 | -2.801 | 0.0256994 | 0.129873  |
| 16852 | 10376929 | <a href="#">BC115504</a>           | <a href="#">67510</a>     | RIKEN cDNA 1810036I24 gene     | <a href="#">1810036I24Rik</a>      | 0.882 | -2.26  | 0.0572172 | 0.218889  |
| 16853 | 10517421 | <a href="#">NM_026383</a>          | <a href="#">52830</a>     | proline-rich nuclear receptor  | <a href="#">Pnrc2</a>              | 0.882 | -2.64  | 0.0325447 | 0.151569  |
| 16854 | 10407390 | <a href="#">NM_001077363</a>       | <a href="#">19205</a>     | polypyrimidine tract binding p | <a href="#">Ptbp1</a>              | 0.882 | -2.719 | 0.0289703 | 0.14001   |
| 16855 | 10439835 |                                    |                           |                                |                                    | 0.882 | -1.152 | 0.286157  | 0.561637  |
| 16856 | 10411915 | <a href="#">NM_172807</a>          | <a href="#">238831</a>    | peptidylprolyl isomerase domai | <a href="#">Ppwd1</a>              | 0.882 | -2.034 | 0.080189  | 0.270159  |
| 16857 | 10501827 | <a href="#">ENSMUST00000050571</a> | <a href="#">319738</a>    | RIKEN cDNA A730020M07 gene     | <a href="#">A730020M07Rik</a>      | 0.882 | -1.495 | 0.17737   | 0.431765  |
| 16858 | 10593050 | <a href="#">NM_008348</a>          | <a href="#">16154</a>     | interleukin 10 receptor, alpha | <a href="#">Il10ra</a>             | 0.882 | -1.264 | 0.245472  | 0.518491  |
| 16859 | 10441718 | <a href="#">NM_016694</a>          | <a href="#">50873</a>     | parkin                         | <a href="#">Park2</a>              | 0.882 | -1.686 | 0.134304  | 0.369418  |
| 16860 | 10587038 | <a href="#">NM_025890</a>          | <a href="#">66991</a>     | RIKEN cDNA 2410004A20 gene     | <a href="#">2410004A20Rik</a>      | 0.882 | -2.472 | 0.0417316 | 0.178221  |
| 16861 | 10440572 | <a href="#">NM_001081068</a>       | <a href="#">78913</a>     | zinc finger protein 294        | <a href="#">Zfp294</a>             | 0.881 | -2.105 | 0.0721344 | 0.252727  |
| 16862 | 10487619 | <a href="#">ENSMUST00000086387</a> | <a href="#">100038393</a> | predicted gene, ENSMUSG0000006 | <a href="#">ENSMUSG00000066864</a> | 0.881 | -1.058 | 0.323993  | 0.600552  |
| 16863 | 10381872 | <a href="#">NM_001112705</a>       | <a href="#">24086</a>     | tousled-like kinase 2 (Arabido | <a href="#">Tlk2</a>               | 0.881 | -2.285 | 0.0551414 | 0.214227  |
| 16864 | 10575867 | <a href="#">NM_019966</a>          | <a href="#">56690</a>     | malonyl-CoA decarboxylase      | <a href="#">Mlycd</a>              | 0.881 | -1.66  | 0.139553  | 0.37791   |
| 16865 | 10429402 | <a href="#">NM_173365</a>          | <a href="#">239530</a>    | G protein-coupled receptor 20  | <a href="#">Gpr20</a>              | 0.881 | -0.999 | 0.349912  | 0.623456  |
| 16866 | 10438730 | <a href="#">NM_009215</a>          | <a href="#">20604</a>     | somatostatin                   | <a href="#">Sst</a>                | 0.881 | -1.496 | 0.177079  | 0.431359  |
| 16867 | 10419073 | <a href="#">NM_145928</a>          | <a href="#">52588</a>     | tetraspanin 14                 | <a href="#">Tspan14</a>            | 0.881 | -1.374 | 0.210613  | 0.476075  |
| 16868 | 10458391 | <a href="#">NM_173383</a>          | <a href="#">213236</a>    | dead end homolog 1 (zebrafish) | <a href="#">Dnd1</a>               | 0.881 | -2.407 | 0.0459889 | 0.19018   |
| 16869 | 10557439 | <a href="#">NM_029339</a>          | <a href="#">75565</a>     | coiled-coil domain containing  | <a href="#">Ccdc101</a>            | 0.881 | -2.279 | 0.0556415 | 0.215355  |
| 16870 | 10418898 | <a href="#">NM_008919</a>          | <a href="#">19065</a>     | pancreatic polypeptide recepto | <a href="#">Ppyr1</a>              | 0.881 | -0.788 | 0.455565  | 0.711878  |

| Accession | Gene ID  | Gene Name                          | Accession                 | Gene Name                      | Accession                          | Gene Name | Accession | Gene Name | Accession | Gene Name |
|-----------|----------|------------------------------------|---------------------------|--------------------------------|------------------------------------|-----------|-----------|-----------|-----------|-----------|
| 16871     | 10405693 | <a href="#">NM_029653</a>          | <a href="#">69635</a>     | death associated protein kinas | <a href="#">Dapk1</a>              |           | 0.881     | -3.109    | 0.0164692 | 0.0962891 |
| 16872     | 10607539 | <a href="#">NM_172307</a>          | <a href="#">270669</a>    | membrane-bound transcription f | <a href="#">Mbtps2</a>             |           | 0.881     | -2.742    | 0.0280012 | 0.137267  |
| 16873     | 10372831 | <a href="#">ENSMUST00000064107</a> | <a href="#">74694</a>     | TBC1 domain family, member 30  | <a href="#">Tbc1d30</a>            |           | 0.881     | -1.19     | 0.271712  | 0.546284  |
| 16874     | 10576946 | <a href="#">NM_176953</a>          | <a href="#">319583</a>    | ligase IV, DNA, ATP-dependent  | <a href="#">Lig4</a>               |           | 0.881     | -2.284    | 0.0552355 | 0.214463  |
| 16875     | 10560094 |                                    |                           |                                |                                    |           | 0.881     | -0.985    | 0.356535  | 0.629004  |
| 16876     | 10394283 | <a href="#">BC067010</a>           | <a href="#">69709</a>     | RIKEN cDNA 2410017P09 gene     | <a href="#">2410017P09Rik</a>      |           | 0.881     | -1.915    | 0.0958361 | 0.301049  |
| 16877     | 10433971 | <a href="#">NM_001033338</a>       | <a href="#">239731</a>    | RIMS binding protein 3         | <a href="#">Rimb3</a>              |           | 0.881     | -1.448    | 0.189618  | 0.448114  |
| 16878     | 10546337 | <a href="#">XR_034314</a>          | <a href="#">665716</a>    | similar to ribosomal protein L | <a href="#">LOC665716</a>          |           | 0.881     | -1.896    | 0.0986118 | 0.30667   |
| 16879     | 10385511 | <a href="#">NM_011190</a>          | <a href="#">19188</a>     | proteasome (prosome, macropain | <a href="#">Psme2</a>              |           | 0.881     | -2.238    | 0.0591794 | 0.224005  |
| 16880     | 10451495 | <a href="#">NM_146078</a>          | <a href="#">224826</a>    | ubiquitin protein ligase E3 co | <a href="#">Ubr2</a>               |           | 0.881     | -1.692    | 0.133278  | 0.367315  |
| 16881     | 10536743 | <a href="#">ENSMUST00000060288</a> | <a href="#">76224</a>     | RIKEN cDNA 6530409C15 gene     | <a href="#">6530409C15Rik</a>      |           | 0.881     | -2.869    | 0.0232702 | 0.121189  |
| 16882     | 10576305 | <a href="#">NM_001037878</a>       | <a href="#">66855</a>     | transcription factor 25 (basic | <a href="#">Tcf25</a>              |           | 0.881     | -2.952    | 0.0206245 | 0.112248  |
| 16883     | 10487943 | <a href="#">ENSMUST00000099339</a> | <a href="#">100038551</a> | predicted gene, ENSMUSG0000007 | <a href="#">ENSMUSG00000074787</a> |           | 0.881     | -0.843    | 0.426375  | 0.687967  |
| 16884     | 10442625 | <a href="#">NM_008340</a>          | <a href="#">16005</a>     | insulin-like growth factor bin | <a href="#">Igfals</a>             |           | 0.881     | -1.584    | 0.155969  | 0.401839  |
| 16885     | 10552743 | <a href="#">NM_010215</a>          | <a href="#">14204</a>     | interleukin 4 induced 1        | <a href="#">Il4i1</a>              |           | 0.881     | -1.689    | 0.133907  | 0.368806  |
| 16886     | 10470543 | <a href="#">BC070440</a>           | <a href="#">241289</a>    | gene model 347, (NCBI)         | <a href="#">Gm347</a>              |           | 0.881     | -1.767    | 0.11938   | 0.345588  |
| 16887     | 10382083 | <a href="#">NM_029467</a>          | <a href="#">75870</a>     | testicular cell adhesion molec | <a href="#">Team1</a>              |           | 0.881     | -1.011    | 0.344632  | 0.61884   |
| 16888     | 10450265 | <a href="#">NM_019442</a>          | <a href="#">54402</a>     | serine/threonine kinase 19     | <a href="#">Stk19</a>              |           | 0.881     | -2.234    | 0.0595222 | 0.224779  |
| 16889     | 10370483 | <a href="#">NM_010925</a>          | <a href="#">18114</a>     | ribosomal RNA processing 1 hom | <a href="#">Rrp1</a>               |           | 0.881     | -3.736    | 0.0069139 | 0.0520241 |
| 16890     | 10527888 | <a href="#">NM_026033</a>          | <a href="#">67210</a>     | GATA zinc finger domain contai | <a href="#">Gatad1</a>             |           | 0.881     | -2.413    | 0.0455283 | 0.18878   |
| 16891     | 10464999 | <a href="#">NM_028623</a>          | <a href="#">73720</a>     | cystatin E/M                   | <a href="#">Cst6</a>               |           | 0.881     | -1.7      | 0.131574  | 0.364342  |
| 16892     | 10409162 | <a href="#">NM_025491</a>          | <a href="#">66329</a>     | sushi domain containing 3      | <a href="#">Susc3</a>              |           | 0.881     | -1.766    | 0.11947   | 0.345748  |
| 16893     | 10508019 | <a href="#">NM_145552</a>          | <a href="#">230737</a>    | guanine nucleotide binding pro | <a href="#">Gnl2</a>               |           | 0.881     | -2.445    | 0.0434343 | 0.183199  |
| 16894     | 10551531 | <a href="#">NM_026716</a>          | <a href="#">68416</a>     | syncollin                      | <a href="#">Syn</a>                |           | 0.881     | -1.748    | 0.12264   | 0.350324  |
| 16895     | 10504068 | <a href="#">ENSMUST00000038960</a> | <a href="#">76992</a>     | RIKEN cDNA 1700066J24 gene     | <a href="#">1700066J24Rik</a>      |           | 0.881     | -2.128    | 0.0696821 | 0.247457  |
| 16896     | 10490799 | <a href="#">XR_030888</a>          | <a href="#">667807</a>    | similar to ubiquitin-like doma | <a href="#">LOC667807</a>          |           | 0.881     | -0.777    | 0.461884  | 0.71646   |
| 16897     | 10508686 | <a href="#">NM_025297</a>          | <a href="#">26922</a>     | mitochondrial trans-2-enoyl-Co | <a href="#">Mecr</a>               |           | 0.881     | -2.791    | 0.0260592 | 0.130787  |
| 16898     | 10504646 |                                    |                           |                                |                                    |           | 0.881     | -0.881    | 0.406474  | 0.67113   |
| 16899     | 10386376 | <a href="#">NM_009522</a>          | <a href="#">22416</a>     | wingless-related MMTV integrat | <a href="#">Wnt3a</a>              |           | 0.881     | -1.102    | 0.306009  | 0.582506  |
| 16900     | 10434121 | <a href="#">NM_009435</a>          | <a href="#">22114</a>     | testis-specific serine kinase  | <a href="#">Tsk1</a>               |           | 0.881     | -2.542    | 0.0375944 | 0.167135  |
| 16901     | 10575894 | <a href="#">NM_026648</a>          | <a href="#">68270</a>     | leucine rich repeat containing | <a href="#">Lrrc50</a>             |           | 0.881     | -1.081    | 0.314531  | 0.591308  |
| 16902     | 10459229 | <a href="#">NM_172832</a>          | <a href="#">240334</a>    | prenylcysteine oxidase 1 like  | <a href="#">Pcyox1l</a>            |           | 0.881     | -1.716    | 0.128533  | 0.359524  |
| 16903     | 10508996 | <a href="#">NM_001081099</a>       | <a href="#">69885</a>     | RIKEN cDNA 2610002D18 gene     | <a href="#">2610002D18Rik</a>      |           | 0.881     | -1.815    | 0.111121  | 0.329899  |
| 16904     | 10378902 | <a href="#">NM_001024205</a>       | <a href="#">68564</a>     | nuclear fragile X mental retar | <a href="#">Nufip2</a>             |           | 0.881     | -2.393    | 0.0469121 | 0.192492  |
| 16905     | 10503341 | <a href="#">NM_019753</a>          | <a href="#">12557</a>     | cadherin 17                    | <a href="#">Cdh17</a>              |           | 0.881     | -0.967    | 0.365014  | 0.636157  |
| 16906     | 10447361 | <a href="#">NM_028639</a>          | <a href="#">225049</a>    | tetratricopeptide repeat domai | <a href="#">Ttc7</a>               |           | 0.881     | -2.154    | 0.0670675 | 0.241827  |
| 16907     | 10511923 | <a href="#">ENSMUST00000067819</a> | <a href="#">242377</a>    | peptidase M20 domain containin | <a href="#">Pm20d2</a>             |           | 0.881     | -1.701    | 0.131479  | 0.364159  |
| 16908     | 10403394 | <a href="#">XR_031052</a>          | <a href="#">382722</a>    | similar to hCG2022736          | <a href="#">LOC382722</a>          |           | 0.881     | -2.053    | 0.0780317 | 0.265642  |
| 16909     | 10445601 | <a href="#">NM_010787</a>          | <a href="#">17256</a>     | male enhanced antigen 1        | <a href="#">Mea1</a>               |           | 0.881     | -2.536    | 0.0379393 | 0.168193  |
| 16910     | 10487392 | <a href="#">NM_019789</a>          | <a href="#">56461</a>     | Kv channel interacting protein | <a href="#">Kenip3</a>             |           | 0.881     | -1.1      | 0.306886  | 0.583525  |
| 16911     | 10365640 | <a href="#">NM_145423</a>          | <a href="#">216225</a>    | solute carrier family 5 (iodid | <a href="#">Slc5a8</a>             |           | 0.881     | -1.825    | 0.109446  | 0.326945  |
| 16912     | 10518561 | <a href="#">NM_027263</a>          | <a href="#">69928</a>     | apoptosis-inducing, TAF9-like  | <a href="#">Aptid1</a>             |           | 0.881     | -2.159    | 0.0665617 | 0.241108  |
| 16913     | 10601819 | <a href="#">NM_001009575</a>       | <a href="#">494468</a>    | armadillo repeat containing, X | <a href="#">Armcx5</a>             |           | 0.88      | -2.263    | 0.0570157 | 0.218378  |
| 16914     | 10393823 | <a href="#">NM_011032</a>          | <a href="#">18453</a>     | prolyl 4-hydroxylase, beta pol | <a href="#">P4hb</a>               |           | 0.88      | -2.301    | 0.0538259 | 0.210683  |
| 16915     | 10473630 | <a href="#">NM_146981</a>          | <a href="#">258983</a>    | olfactory receptor 1260        | <a href="#">Olfr1260</a>           |           | 0.88      | -1.873    | 0.101948  | 0.312948  |
| 16916     | 10385096 | <a href="#">NM_027398</a>          | <a href="#">70357</a>     | Kv channel-interacting protein | <a href="#">Kenip1</a>             |           | 0.88      | -0.797    | 0.45092   | 0.708135  |
| 16917     | 10393642 | <a href="#">NM_138669</a>          | <a href="#">192170</a>    | eukaryotic translation initiat | <a href="#">Eif4a3</a>             |           | 0.88      | -1.97     | 0.0882491 | 0.286363  |
| 16918     | 10410115 | <a href="#">NM_025370</a>          | <a href="#">66129</a>     | RIKEN cDNA 1110018J18 gene     | <a href="#">1110018J18Rik</a>      |           | 0.88      | -1.363    | 0.213988  | 0.480314  |
| 16919     | 10408134 | <a href="#">NM_134225</a>          | <a href="#">171259</a>    | vomeronal 1 receptor, I9       | <a href="#">V1ri9</a>              |           | 0.88      | -0.873    | 0.410889  | 0.675081  |
| 16920     | 10452082 | <a href="#">NM_011483</a>          | <a href="#">20834</a>     | zinc and ring finger 4         | <a href="#">Znrf4</a>              |           | 0.88      | -1.408    | 0.200672  | 0.462604  |
| 16921     | 10451421 | <a href="#">NM_027910</a>          | <a href="#">71765</a>     | kelch domain containing 3      | <a href="#">Klhdc3</a>             |           | 0.88      | -2.116    | 0.070981  | 0.250137  |
| 16922     | 10427742 | <a href="#">XR_001896</a>          | <a href="#">666579</a>    | predicted gene, EG666579       | <a href="#">EG666579</a>           |           | 0.88      | -1.493    | 0.177938  | 0.432551  |
| 16923     | 10525430 | <a href="#">NM_011076</a>          | <a href="#">18438</a>     | purinergic receptor P2X ligand | <a href="#">P2rx4</a>              |           | 0.88      | -1.652    | 0.141253  | 0.380418  |

|       |          |                                    |                           |                                 |                                    |       |        |            |           |
|-------|----------|------------------------------------|---------------------------|---------------------------------|------------------------------------|-------|--------|------------|-----------|
| 16925 | 10525757 | <a href="#">NM_011020</a>          | <a href="#">19739</a>     | purinergic receptor 12A, ligand | <a href="#">121A7</a>              | 0.88  | -1.032 | 0.141255   | 0.580716  |
| 16924 | 10452538 | <a href="#">NM_001114098</a>       | <a href="#">68617</a>     | RIKEN cDNA 1110012J17 gene      | <a href="#">1110012J17Rik</a>      | 0.88  | -1.262 | 0.246395   | 0.51947   |
| 16925 | 10547540 | <a href="#">BC043122</a>           | <a href="#">194401</a>    | microtubule associated monoxyg  | <a href="#">Mical3</a>             | 0.88  | -1.521 | 0.170943   | 0.42274   |
| 16926 | 10593526 | <a href="#">NM_007499</a>          | <a href="#">11920</a>     | ataxia telangiectasia mutated   | <a href="#">Atm</a>                | 0.88  | -2.135 | 0.0690215  | 0.246186  |
| 16927 | 10416199 | <a href="#">NM_026174</a>          | <a href="#">67464</a>     | ectonucleoside triphosphate di  | <a href="#">Entpd4</a>             | 0.88  | -1.855 | 0.104762   | 0.318672  |
| 16928 | 10570180 | <a href="#">BC066076</a>           | <a href="#">434280</a>    | predicted gene, EG434280        | <a href="#">EG434280</a>           | 0.88  | -1.609 | 0.15044    | 0.393664  |
| 16929 | 10548679 |                                    |                           |                                 |                                    | 0.88  | -0.852 | 0.421397   | 0.683844  |
| 16930 | 10449687 | <a href="#">NM_025290</a>          | <a href="#">22092</a>     | radial spoke head 1 homolog (C  | <a href="#">Rsph1</a>              | 0.88  | -2.21  | 0.0616835  | 0.229458  |
| 16931 | 10415446 | <a href="#">NM_138652</a>          | <a href="#">192113</a>    | ATPase, H+/K+ transporting, no  | <a href="#">Atp12a</a>             | 0.88  | -1.545 | 0.165105   | 0.415207  |
| 16932 | 10460385 | <a href="#">NM_019952</a>          | <a href="#">56708</a>     | cardiotrophin-like cytokine fa  | <a href="#">Clcf1</a>              | 0.88  | -1.595 | 0.153406   | 0.397723  |
| 16933 | 10467871 | <a href="#">NM_028029</a>          | <a href="#">71972</a>     | dynamamin binding protein       | <a href="#">Dnmbp</a>              | 0.88  | -2.91  | 0.0219105  | 0.116412  |
| 16934 | 10403076 |                                    |                           |                                 |                                    | 0.88  | -1.66  | 0.139544   | 0.37791   |
| 16935 | 10597978 | <a href="#">NM_148925</a>          | <a href="#">17281</a>     | FYVE and coiled-coil domain co  | <a href="#">Fyco1</a>              | 0.88  | -2.215 | 0.0612162  | 0.228343  |
| 16936 | 10596637 | <a href="#">NM_178907</a>          | <a href="#">102626</a>    | mitogen-activated protein kina  | <a href="#">Mapkapk3</a>           | 0.88  | -2.295 | 0.0542864  | 0.211894  |
| 16937 | 10438822 | <a href="#">NM_175650</a>          | <a href="#">268878</a>    | ATPase type 13A5                | <a href="#">Atp13a5</a>            | 0.88  | -0.79  | 0.454605   | 0.711012  |
| 16938 | 10574213 | <a href="#">NM_009137</a>          | <a href="#">20299</a>     | chemokine (C-C motif) ligand 2  | <a href="#">Ccl22</a>              | 0.88  | -1.314 | 0.229001   | 0.5       |
| 16939 | 10516908 |                                    |                           |                                 |                                    | 0.88  | -1.017 | 0.341841   | 0.616313  |
| 16940 | 10501922 |                                    |                           |                                 |                                    | 0.88  | -1.069 | 0.319717   | 0.596635  |
| 16941 | 10555576 | <a href="#">BC006736</a>           | <a href="#">75430</a>     | RIKEN cDNA 3200002M19 gene      | <a href="#">3200002M19Rik</a>      | 0.88  | -3.417 | 0.0106871  | 0.0711265 |
| 16942 | 10406466 | <a href="#">NM_175187</a>          | <a href="#">72745</a>     | transmembrane protein 161B      | <a href="#">Tmem161b</a>           | 0.88  | -2.381 | 0.0478179  | 0.194851  |
| 16943 | 10459552 | <a href="#">NM_194355</a>          | <a href="#">68166</a>     | spire homolog 1 (Drosophila)    | <a href="#">Spire1</a>             | 0.88  | -2.191 | 0.0634459  | 0.233643  |
| 16944 | 10448409 | <a href="#">NM_133731</a>          | <a href="#">70835</a>     | protease, serine, 22            | <a href="#">Prss22</a>             | 0.88  | -1.839 | 0.107221   | 0.322736  |
| 16945 | 10371877 | <a href="#">NM_133668</a>          | <a href="#">18674</a>     | solute carrier family 25 (mito  | <a href="#">Slc25a3</a>            | 0.88  | -3.122 | 0.0161608  | 0.0951292 |
| 16946 | 10600524 | <a href="#">NM_011692</a>          | <a href="#">22327</a>     | von Hippel-Lindau binding prot  | <a href="#">Vbp1</a>               | 0.88  | -1.713 | 0.129196   | 0.360384  |
| 16947 | 10542264 | <a href="#">ENSMUST00000100864</a> | <a href="#">381820</a>    | RIKEN cDNA 2700089E24 gene      | <a href="#">2700089E24Rik</a>      | 0.88  | -2.215 | 0.0611823  | 0.228316  |
| 16948 | 10596137 | <a href="#">NM_009275</a>          | <a href="#">20818</a>     | signal recognition particle re  | <a href="#">Sprrb</a>              | 0.88  | -3.911 | 0.00548632 | 0.0441916 |
| 16949 | 10395825 | <a href="#">NR_003959</a>          | <a href="#">79459</a>     | aldolase 1, A isoform, retroge  | <a href="#">Aldoa2</a>             | 0.88  | -1.864 | 0.103357   | 0.315943  |
| 16950 | 10530257 | <a href="#">ENSMUST00000101177</a> | <a href="#">384261</a>    | hypothetical LOC384261          | <a href="#">LOC384261</a>          | 0.88  | -1.436 | 0.192918   | 0.452347  |
| 16951 | 10581640 | <a href="#">XR_033068</a>          | <a href="#">668089</a>    | similar to Larp2 protein        | <a href="#">LOC668089</a>          | 0.879 | -1.815 | 0.111067   | 0.329804  |
| 16952 | 10542371 |                                    |                           |                                 |                                    | 0.879 | -1.624 | 0.147083   | 0.388984  |
| 16953 | 10554667 | <a href="#">NM_177695</a>          | <a href="#">233424</a>    | transmembrane channel-like gen  | <a href="#">Tmc3</a>               | 0.879 | -1.657 | 0.140135   | 0.378727  |
| 16954 | 10550290 | <a href="#">NM_133234</a>          | <a href="#">170770</a>    | Bcl-2 binding component 3       | <a href="#">Bbc3</a>               | 0.879 | -3.028 | 0.0184979  | 0.104021  |
| 16955 | 10357242 | <a href="#">NM_001037999</a>       | <a href="#">13167</a>     | diazepam binding inhibitor      | <a href="#">Dbi</a>                | 0.879 | -3.218 | 0.014113   | 0.0863198 |
| 16956 | 10498146 | <a href="#">NM_172501</a>          | <a href="#">212114</a>    | NHL repeat containing 3         | <a href="#">Nhlrc3</a>             | 0.879 | -2.655 | 0.0318381  | 0.149331  |
| 16957 | 10404496 | <a href="#">NM_020282</a>          | <a href="#">18105</a>     | NAD(P)H dehydrogenase, quinone  | <a href="#">Nqo2</a>               | 0.879 | -1.629 | 0.146148   | 0.387967  |
| 16958 | 10552779 | <a href="#">NM_027376</a>          | <a href="#">70300</a>     | fuzzy homolog (Drosophila)      | <a href="#">Fuz</a>                | 0.879 | -1.284 | 0.238706   | 0.511419  |
| 16959 | 10555339 | <a href="#">NM_001017985</a>       | <a href="#">277939</a>    | C2 calcium-dependent domain co  | <a href="#">C2cd3</a>              | 0.879 | -2.49  | 0.0406012  | 0.175593  |
| 16960 | 10457508 | <a href="#">NM_008720</a>          | <a href="#">18145</a>     | Niemann Pick type C1            | <a href="#">Npc1</a>               | 0.879 | -2.016 | 0.0824357  | 0.274578  |
| 16961 | 10566188 |                                    |                           |                                 |                                    | 0.879 | -1.487 | 0.179366   | 0.434671  |
| 16962 | 10586110 | <a href="#">NM_001033175</a>       | <a href="#">76524</a>     | ceroid-lipofuscinosis, neurona  | <a href="#">Cln6</a>               | 0.879 | -2.228 | 0.0600451  | 0.22593   |
| 16963 | 10363481 | <a href="#">NM_013611</a>          | <a href="#">18119</a>     | nodal                           | <a href="#">Nodal</a>              | 0.879 | -1.356 | 0.215995   | 0.483076  |
| 16964 | 10568278 | <a href="#">ENSMUST00000094032</a> | <a href="#">68232</a>     | RIKEN cDNA 1700120K04 gene      | <a href="#">1700120K04Rik</a>      | 0.879 | -1.635 | 0.144892   | 0.38638   |
| 16965 | 10545768 | <a href="#">ENSMUST00000101229</a> | <a href="#">100038556</a> | predicted gene, ENSMUSG0000007  | <a href="#">ENSMUSG00000072956</a> | 0.879 | -1.785 | 0.11613    | 0.338871  |
| 16966 | 10351738 | <a href="#">NM_023041</a>          | <a href="#">19298</a>     | peroxisome biogenesis factor 1  | <a href="#">Pex19</a>              | 0.879 | -2.448 | 0.0432764  | 0.182768  |
| 16967 | 10565288 | <a href="#">NM_133722</a>          | <a href="#">70178</a>     | RIKEN cDNA 2210412D01 gene      | <a href="#">2210412D01Rik</a>      | 0.879 | -2.509 | 0.0394794  | 0.172434  |
| 16968 | 10555848 | <a href="#">NM_001013616</a>       | <a href="#">94088</a>     | tripartite motif-containing 6   | <a href="#">Trim6</a>              | 0.879 | -2.889 | 0.0226073  | 0.118878  |
| 16969 | 10524684 | <a href="#">NM_008629</a>          | <a href="#">17690</a>     | Musashi homolog 1(Drosophila)   | <a href="#">Msi1</a>               | 0.879 | -1.967 | 0.0886611  | 0.286953  |
| 16970 | 10506668 | <a href="#">NM_145550</a>          | <a href="#">230584</a>    | Yip1 domain family, member 1    | <a href="#">Yipfl</a>              | 0.879 | -1.95  | 0.0909413  | 0.291551  |
| 16971 | 10351041 |                                    |                           |                                 |                                    | 0.879 | -0.91  | 0.392406   | 0.660382  |
| 16972 | 10576696 | <a href="#">NM_010568</a>          | <a href="#">16337</a>     | insulin receptor                | <a href="#">Insr</a>               | 0.879 | -2.164 | 0.0661014  | 0.239857  |
| 16973 | 10593723 | <a href="#">NM_053178</a>          | <a href="#">94180</a>     | acyl-CoA synthetase bubblegum   | <a href="#">Acsbg1</a>             | 0.879 | -1.577 | 0.157644   | 0.404469  |
| 16974 | 10356932 | <a href="#">BC023951</a>           | <a href="#">52392</a>     | DNA segment, Chr 1, ERATO Doi   | <a href="#">D1Erd622e</a>          | 0.879 | -1.616 | 0.148845   | 0.391099  |

|       |          |                                    |                        |                                |                               |       |        |            |           |
|-------|----------|------------------------------------|------------------------|--------------------------------|-------------------------------|-------|--------|------------|-----------|
| 16975 | 10589793 | <a href="#">XR_034007</a>          | <a href="#">636680</a> | similar to Glyceraldehyde-3-ph | <a href="#">LOC636680</a>     | 0.879 | -1.008 | 0.346226   | 0.620338  |
| 16976 | 10576090 | <a href="#">NM_009569</a>          | <a href="#">22761</a>  | zinc finger protein, multitype | <a href="#">Zfpm1</a>         | 0.879 | -2.316 | 0.0526724  | 0.207781  |
| 16977 | 10473600 | <a href="#">NM_146919</a>          | <a href="#">258921</a> | olfactory receptor 1188        | <a href="#">Olfr1188</a>      | 0.879 | -1.027 | 0.337725   | 0.613265  |
| 16978 | 10601356 | <a href="#">NM_025379</a>          | <a href="#">66142</a>  | cytochrome c oxidase subunit V | <a href="#">Cox7b</a>         | 0.879 | -2.117 | 0.0709104  | 0.250013  |
| 16979 | 10557313 | <a href="#">ENSMUST00000060220</a> | <a href="#">75207</a>  | RIKEN cDNA 4930533L02 gene     | <a href="#">4930533L02Rik</a> | 0.879 | -1.428 | 0.195254   | 0.455478  |
| 16980 | 10373374 | <a href="#">NM_028092</a>          | <a href="#">72002</a>  | solute carrier family 39 (meta | <a href="#">Slc39a5</a>       | 0.879 | -1.697 | 0.132234   | 0.365389  |
| 16981 | 10411595 | <a href="#">NM_010872</a>          | <a href="#">17948</a>  | NLR family, apoptosis inhibito | <a href="#">Naip2</a>         | 0.879 | -1.349 | 0.218045   | 0.486044  |
| 16982 | 10441774 | <a href="#">NM_013667</a>          | <a href="#">20518</a>  | solute carrier family 22 (orga | <a href="#">Slc22a2</a>       | 0.879 | -1.631 | 0.145686   | 0.38722   |
| 16983 | 10517945 | <a href="#">NM_001033374</a>       | <a href="#">277744</a> | gene model 694, (NCBI)         | <a href="#">Gm694</a>         | 0.879 | -0.938 | 0.378616   | 0.648305  |
| 16984 | 10452766 |                                    |                        |                                |                               | 0.879 | -1.11  | 0.30261    | 0.578712  |
| 16985 | 10591763 | <a href="#">NM_145612</a>          | <a href="#">235050</a> | zinc finger protein 810        | <a href="#">Zfp810</a>        | 0.879 | -1.704 | 0.130814   | 0.362937  |
| 16986 | 10437040 | <a href="#">NM_028083</a>          | <a href="#">110749</a> | chromatin assembly factor 1, s | <a href="#">Chaf1b</a>        | 0.879 | -2.308 | 0.0532863  | 0.209343  |
| 16987 | 10523001 | <a href="#">NM_026735</a>          | <a href="#">68473</a>  | MOB1, Mps One Binder kinase ac | <a href="#">Mobk1a</a>        | 0.879 | -2.672 | 0.0310419  | 0.146999  |
| 16988 | 10484486 | <a href="#">ENSMUST00000099933</a> | <a href="#">228139</a> | purinergic receptor P2X, ligan | <a href="#">P2rx3</a>         | 0.879 | -1.326 | 0.225153   | 0.495241  |
| 16989 | 10411899 | <a href="#">NM_025879</a>          | <a href="#">66975</a>  | RIKEN cDNA 2410002O22 gene     | <a href="#">2410002O22Rik</a> | 0.879 | -2.209 | 0.0617906  | 0.229738  |
| 16990 | 10464504 | <a href="#">NM_008513</a>          | <a href="#">16973</a>  | low density lipoprotein recept | <a href="#">Lrp5</a>          | 0.879 | -2.523 | 0.0386937  | 0.170092  |
| 16991 | 10399389 | <a href="#">ENSMUST00000055358</a> | <a href="#">73304</a>  | RIKEN cDNA 1700034J04 gene     | <a href="#">1700034J04Rik</a> | 0.879 | -2.109 | 0.071763   | 0.251634  |
| 16992 | 10600390 | <a href="#">NM_010273</a>          | <a href="#">14567</a>  | guanosine diphosphate (GDP) di | <a href="#">Gdi1</a>          | 0.879 | -2.653 | 0.0319022  | 0.149499  |
| 16993 | 10593245 | <a href="#">NM_020274</a>          | <a href="#">57014</a>  | 5-hydroxytryptamine (serotonin | <a href="#">Htr3b</a>         | 0.879 | -1.026 | 0.338176   | 0.613769  |
| 16994 | 10516652 | <a href="#">NM_198026</a>          | <a href="#">230767</a> | IQ motif containing C          | <a href="#">Iqcc</a>          | 0.879 | -2.266 | 0.0567738  | 0.217982  |
| 16995 | 10490535 | <a href="#">NM_080641</a>          | <a href="#">140489</a> | basic helix-loop-helix domain  | <a href="#">Bhlhb4</a>        | 0.879 | -1.426 | 0.195761   | 0.456157  |
| 16996 | 10480314 |                                    |                        |                                |                               | 0.878 | -1.94  | 0.0923754  | 0.294554  |
| 16997 | 10358283 | <a href="#">NM_133239</a>          | <a href="#">170788</a> | crumbs homolog 1 (Drosophila)  | <a href="#">Crb1</a>          | 0.878 | -1.666 | 0.138356   | 0.376355  |
| 16998 | 10488630 | <a href="#">NM_001037933</a>       | <a href="#">629114</a> | defensin beta 23               | <a href="#">Defb23</a>        | 0.878 | -0.89  | 0.40216    | 0.667342  |
| 16999 | 10560487 | <a href="#">NM_145822</a>          | <a href="#">70333</a>  | CD3E antigen, epsilon polypept | <a href="#">Cd3eap</a>        | 0.878 | -3.74  | 0.00688347 | 0.0518504 |
| 17000 | 10456291 |                                    |                        |                                |                               | 0.878 | -0.836 | 0.430236   | 0.691063  |
| 17001 | 10582094 | <a href="#">NM_019709</a>          | <a href="#">56453</a>  | membrane-bound transcription f | <a href="#">Mbtps1</a>        | 0.878 | -2.129 | 0.0696418  | 0.247355  |
| 17002 | 10598598 | <a href="#">NM_026096</a>          | <a href="#">67334</a>  | RIKEN cDNA 1700054O13 gene     | <a href="#">1700054O13Rik</a> | 0.878 | -2.126 | 0.0699124  | 0.247718  |
| 17003 | 10381334 | <a href="#">NM_026562</a>          | <a href="#">68107</a>  | cyclin N-terminal domain conta | <a href="#">Cntd1</a>         | 0.878 | -1.868 | 0.102753   | 0.314642  |
| 17004 | 10486322 |                                    |                        |                                |                               | 0.878 | -2.078 | 0.0751792  | 0.259229  |
| 17005 | 10545644 | <a href="#">NM_016757</a>          | <a href="#">22377</a>  | WW domain binding protein 1    | <a href="#">Wbp1</a>          | 0.878 | -1.933 | 0.0932933  | 0.296052  |
| 17006 | 10438911 | <a href="#">ENSMUST00000061350</a> | <a href="#">224088</a> | ATPase type 13A3               | <a href="#">Atp13a3</a>       | 0.878 | -1.964 | 0.0890392  | 0.287785  |
| 17007 | 10504349 | <a href="#">NM_013497</a>          | <a href="#">12913</a>  | cAMP responsive element bindin | <a href="#">Creb3</a>         | 0.878 | -2.041 | 0.0794428  | 0.268415  |
| 17008 | 10535750 | <a href="#">NM_029581</a>          | <a href="#">76366</a>  | mitochondrial translational in | <a href="#">Mtif3</a>         | 0.878 | -1.785 | 0.116183   | 0.338931  |
| 17009 | 10400844 | <a href="#">NM_133198</a>          | <a href="#">110095</a> | liver glycogen phosphorylase   | <a href="#">Pylg</a>          | 0.878 | -0.915 | 0.389559   | 0.658209  |
| 17010 | 10465553 | <a href="#">NM_008020</a>          | <a href="#">14227</a>  | FK506 binding protein 2        | <a href="#">Fkbp2</a>         | 0.878 | -2.238 | 0.0591652  | 0.223991  |
| 17011 | 10445107 | <a href="#">ENSMUST00000080694</a> | <a href="#">224763</a> | predicted gene, EG224763       | <a href="#">EG224763</a>      | 0.878 | -1.591 | 0.154304   | 0.399194  |
| 17012 | 10428211 | <a href="#">NM_026521</a>          | <a href="#">68036</a>  | zinc finger protein 706        | <a href="#">Zfp706</a>        | 0.878 | -2.199 | 0.0627085  | 0.231802  |
| 17013 | 10539251 | <a href="#">AF084364</a>           | <a href="#">110958</a> | DNA segment, Chr 6, Miriam Mei | <a href="#">D6Mm5e</a>        | 0.878 | -1.633 | 0.145246   | 0.386933  |
| 17014 | 10549256 | <a href="#">NM_021284</a>          | <a href="#">16653</a>  | v-Ki-ras2 Kirsten rat sarcoma  | <a href="#">Kras</a>          | 0.878 | -2.444 | 0.0435331  | 0.183506  |
| 17015 | 10553471 | <a href="#">BC060958</a>           | <a href="#">243996</a> | RIKEN cDNA 4933405O20 gene     | <a href="#">4933405O20Rik</a> | 0.878 | -0.932 | 0.381476   | 0.651192  |
| 17016 | 10603508 | <a href="#">NM_133991</a>          | <a href="#">54632</a>  | FtsJ homolog 1 (E. coli)       | <a href="#">Ftsj1</a>         | 0.878 | -1.489 | 0.178769   | 0.433871  |
| 17017 | 10376412 | <a href="#">NM_001011760</a>       | <a href="#">257917</a> | olfactory receptor 314         | <a href="#">Olfr314</a>       | 0.878 | -1.13  | 0.294608   | 0.570921  |
| 17018 | 10401661 | <a href="#">NM_026775</a>          | <a href="#">68581</a>  | transmembrane emp24-like traff | <a href="#">Tmed10</a>        | 0.878 | -2.608 | 0.0341294  | 0.156265  |
| 17019 | 10471519 | <a href="#">NM_152800</a>          | <a href="#">30933</a>  | torsin family 2, member A      | <a href="#">Tor2a</a>         | 0.878 | -1.867 | 0.102824   | 0.314815  |
| 17020 | 10545009 | <a href="#">NM_025574</a>          | <a href="#">66459</a>  | phosphatidylinositol glycan an | <a href="#">Pigy</a>          | 0.878 | -2.664 | 0.0314266  | 0.148244  |
| 17021 | 10348666 | <a href="#">NM_175118</a>          | <a href="#">67446</a>  | dual specificity phosphatase 2 | <a href="#">Dusp28</a>        | 0.878 | -2.228 | 0.0600836  | 0.22593   |
| 17022 | 10522265 | <a href="#">NM_178651</a>          | <a href="#">109108</a> | solute carrier family 30 (zinc | <a href="#">Slc30a9</a>       | 0.878 | -1.625 | 0.146958   | 0.388895  |
| 17023 | 10446594 |                                    |                        |                                |                               | 0.878 | -2.169 | 0.0655794  | 0.2387    |
| 17024 | 10591009 | <a href="#">NM_144933</a>          | <a href="#">234959</a> | mediator complex subunit 17    | <a href="#">Med17</a>         | 0.878 | -2.503 | 0.0398642  | 0.173611  |
| 17025 | 10583887 | <a href="#">NM_175678</a>          | <a href="#">319239</a> | neuropeptide S receptor 1      | <a href="#">Npsr1</a>         | 0.878 | -0.996 | 0.351675   | 0.624753  |
| 17026 | 10538970 | <a href="#">NM_145568</a>          | <a href="#">57896</a>  | lysine-rich coiled-coil 1      | <a href="#">Krccl</a>         | 0.878 | -2.675 | 0.030913   | 0.146668  |

|       |          |                                    |                           |                                 |                                    |       |        |            |           |
|-------|----------|------------------------------------|---------------------------|---------------------------------|------------------------------------|-------|--------|------------|-----------|
| 17027 | 10551714 | <a href="#">AK004111</a>           | <a href="#">68686</a>     | RIKEN cDNA 1110035H17 gene      | <a href="#">1110035H17Rik</a>      | 0.878 | -1.247 | 0.251487   | 0.525513  |
| 17028 | 10376459 | <a href="#">XM_905850</a>          | <a href="#">382523</a>    | similar to histone H3           | <a href="#">LOC382523</a>          | 0.878 | -2.367 | 0.048825   | 0.197883  |
| 17029 | 10449471 | <a href="#">NM_016795</a>          | <a href="#">20815</a>     | serine/arginine-rich protein s  | <a href="#">Srpk1</a>              | 0.878 | -2.953 | 0.0205872  | 0.112161  |
| 17030 | 10450852 | <a href="#">NM_146477</a>          | <a href="#">258469</a>    | olfactory receptor 90           | <a href="#">Olf90</a>              | 0.878 | -0.636 | 0.544408   | 0.776582  |
| 17031 | 10598407 | <a href="#">XM_977398</a>          | <a href="#">236622</a>    | predicted gene, EG236622        | <a href="#">EG236622</a>           | 0.878 | -1.453 | 0.188174   | 0.446289  |
| 17032 | 10369835 | <a href="#">NM_178621</a>          | <a href="#">70911</a>     | phytanoyl-CoA hydroxylase inte  | <a href="#">Phyhipl</a>            | 0.878 | -1.066 | 0.32076    | 0.597672  |
| 17033 | 10532180 | <a href="#">NM_007756</a>          | <a href="#">12889</a>     | complexin 1                     | <a href="#">Cplx1</a>              | 0.878 | -1.744 | 0.123468   | 0.351591  |
| 17034 | 10416379 | <a href="#">NM_011506</a>          | <a href="#">20916</a>     | succinate-Coenzyme A ligase, A  | <a href="#">Sucla2</a>             | 0.878 | -2.904 | 0.0220999  | 0.117082  |
| 17035 | 10463380 | <a href="#">NM_176958</a>          | <a href="#">319594</a>    | hypoxia-inducible factor 1, al  | <a href="#">Hif1an</a>             | 0.878 | -1.459 | 0.186822   | 0.445139  |
| 17036 | 10345357 | <a href="#">NM_178601</a>          | <a href="#">27993</a>     | IMP4, U3 small nucleolar ribon  | <a href="#">Imp4</a>               | 0.878 | -2.136 | 0.0689423  | 0.245987  |
| 17037 | 10369086 | <a href="#">NM_053187</a>          | <a href="#">94221</a>     | golgi associated PDZ and coile  | <a href="#">Gopc</a>               | 0.878 | -1.825 | 0.109518   | 0.327115  |
| 17038 | 10475630 | <a href="#">NM_175154</a>          | <a href="#">69976</a>     | galactokinase 2                 | <a href="#">Galk2</a>              | 0.878 | -1.817 | 0.110836   | 0.329565  |
| 17039 | 10484563 | <a href="#">NM_146577</a>          | <a href="#">258570</a>    | olfactory receptor 1043         | <a href="#">Olf1043</a>            | 0.878 | -1.173 | 0.278008   | 0.553138  |
| 17040 | 10445670 | <a href="#">NM_183086</a>          | <a href="#">64657</a>     | mitochondrial ribosomal protei  | <a href="#">Mrps10</a>             | 0.878 | -2.518 | 0.0389918  | 0.171081  |
| 17041 | 10582190 | <a href="#">NM_178856</a>          | <a href="#">272551</a>    | GINS complex subunit 2 (Psf 2 h | <a href="#">Gins2</a>              | 0.877 | -1.946 | 0.0914849  | 0.292907  |
| 17042 | 10404521 | <a href="#">NM_026512</a>          | <a href="#">68021</a>     | biphenyl hydrolase-like (serin  | <a href="#">Bphl</a>               | 0.877 | -1.915 | 0.0957542  | 0.30097   |
| 17043 | 10365572 | <a href="#">NR_000040</a>          | <a href="#">22172</a>     | thymidylate synthase, pseudoge  | <a href="#">Tyms-ps</a>            | 0.877 | -2.328 | 0.0517104  | 0.205551  |
| 17044 | 10421180 | <a href="#">NM_173420</a>          | <a href="#">239167</a>    | RIKEN cDNA D930020E02 gene      | <a href="#">D930020E02Rik</a>      | 0.877 | -1.657 | 0.140173   | 0.378762  |
| 17045 | 10432362 | <a href="#">NM_026967</a>          | <a href="#">69159</a>     | Ras homolog enriched in brain   | <a href="#">Rheb1l</a>             | 0.877 | -0.65  | 0.535828   | 0.769253  |
| 17046 | 10555197 | <a href="#">NM_010837</a>          | <a href="#">17760</a>     | microtubule-associated protein  | <a href="#">Mtap6</a>              | 0.877 | -1.057 | 0.32451    | 0.601037  |
| 17047 | 10344935 | <a href="#">NM_001098528</a>       | <a href="#">98741</a>     | potassium voltage gated channe  | <a href="#">Kcnb2</a>              | 0.877 | -1.023 | 0.33952    | 0.614887  |
| 17048 | 10570236 | <a href="#">NM_178076</a>          | <a href="#">17207</a>     | mcf.2 transforming sequence-li  | <a href="#">Mcf2l</a>              | 0.877 | -2.397 | 0.0466544  | 0.191956  |
| 17049 | 10537452 | <a href="#">NM_026612</a>          | <a href="#">68198</a>     | NADH dehydrogenase (ubiquinone  | <a href="#">Ndufb2</a>             | 0.877 | -1.682 | 0.13514    | 0.370646  |
| 17050 | 10361651 | <a href="#">NM_145706</a>          | <a href="#">69912</a>     | nucleoporin 43                  | <a href="#">Nup43</a>              | 0.877 | -2.399 | 0.0465234  | 0.191678  |
| 17051 | 10407955 | <a href="#">NM_134065</a>          | <a href="#">105298</a>    | ependymin related protein 1 (z  | <a href="#">Epdrl</a>              | 0.877 | -2.485 | 0.0409098  | 0.176312  |
| 17052 | 10430618 | <a href="#">NM_017470</a>          | <a href="#">54152</a>     | dynein, axonemal, light chain   | <a href="#">Dnalc4</a>             | 0.877 | -1.995 | 0.0851085  | 0.280258  |
| 17053 | 10378349 | <a href="#">NM_001001445</a>       | <a href="#">193034</a>    | transient receptor potential c  | <a href="#">Trpv1</a>              | 0.877 | -1.373 | 0.211064   | 0.476598  |
| 17054 | 10551996 |                                    |                           |                                 |                                    | 0.877 | -1.649 | 0.141784   | 0.381361  |
| 17055 | 10346250 | <a href="#">NM_010834</a>          | <a href="#">17700</a>     | myostatin                       | <a href="#">Mstn</a>               | 0.877 | -0.952 | 0.371817   | 0.642152  |
| 17056 | 10582658 | <a href="#">NM_007428</a>          | <a href="#">11606</a>     | angiotensinogen (serpin peptid  | <a href="#">Agt</a>                | 0.877 | -1.934 | 0.0931686  | 0.295834  |
| 17057 | 10399722 | <a href="#">ENSMUST00000063754</a> | <a href="#">636791</a>    | predicted gene, EG636791        | <a href="#">EG636791</a>           | 0.877 | -0.918 | 0.388362   | 0.65703   |
| 17058 | 10506781 | <a href="#">BC012391</a>           | <a href="#">69893</a>     | RIKEN cDNA 2010305A19 gene      | <a href="#">2010305A19Rik</a>      | 0.877 | -1.547 | 0.164625   | 0.414483  |
| 17059 | 10416273 | <a href="#">NM_145981</a>          | <a href="#">105653</a>    | phytanoyl-CoA hydroxylase inte  | <a href="#">Phyhip</a>             | 0.877 | -1.681 | 0.135303   | 0.370761  |
| 17060 | 10414984 | <a href="#">ENSMUST00000103675</a> | <a href="#">100046160</a> | predicted gene, OTTMUSG0000001  | <a href="#">OTTMUSG00000015007</a> | 0.877 | -1.162 | 0.282082   | 0.557189  |
| 17061 | 10597770 | <a href="#">ENSMUST00000068626</a> | <a href="#">546166</a>    | predicted gene, EG546166        | <a href="#">EG546166</a>           | 0.877 | -1.437 | 0.192662   | 0.452175  |
| 17062 | 10570764 | <a href="#">NM_183142</a>          | <a href="#">207958</a>    | asparagine-linked glycosylatio  | <a href="#">Alg1l</a>              | 0.877 | -2.505 | 0.039733   | 0.173255  |
| 17063 | 10351138 | <a href="#">XR_031476</a>          | <a href="#">665237</a>    | similar to hCG31107             | <a href="#">LOC665237</a>          | 0.877 | -2.154 | 0.0670633  | 0.241827  |
| 17064 | 10445633 | <a href="#">NM_008938</a>          | <a href="#">19133</a>     | peripherin 2                    | <a href="#">Prph2</a>              | 0.877 | -1.908 | 0.0968716  | 0.303131  |
| 17065 | 10491313 | <a href="#">NM_008770</a>          | <a href="#">18417</a>     | claudin 11                      | <a href="#">Cldn11</a>             | 0.877 | -2.525 | 0.0385767  | 0.169907  |
| 17066 | 10465114 | <a href="#">NM_178637</a>          | <a href="#">81601</a>     | HIV-1 tat interactive protein,  | <a href="#">Htatip</a>             | 0.877 | -2.233 | 0.0595558  | 0.224825  |
| 17067 | 10428328 | <a href="#">NM_172402</a>          | <a href="#">69906</a>     | solute carrier family 25, memb  | <a href="#">Slc25a32</a>           | 0.877 | -1.384 | 0.20763    | 0.472138  |
| 17068 | 10519234 | <a href="#">NM_080445</a>          | <a href="#">117592</a>    | UDP-Gal:betaGal beta 1,3-galac  | <a href="#">B3galt6</a>            | 0.877 | -1.759 | 0.120755   | 0.347238  |
| 17069 | 10497203 | <a href="#">NM_010423</a>          | <a href="#">15213</a>     | hairy/enhancer-of-split relate  | <a href="#">Hey1</a>               | 0.877 | -2.031 | 0.0805892  | 0.270946  |
| 17070 | 10382316 | <a href="#">NM_010604</a>          | <a href="#">16517</a>     | potassium inwardly-rectifying   | <a href="#">Kcnj16</a>             | 0.877 | -1.07  | 0.319314   | 0.596377  |
| 17071 | 10539739 | <a href="#">NM_026414</a>          | <a href="#">67855</a>     | aspartic peptidase, retroviral  | <a href="#">Asprv1</a>             | 0.877 | -1.549 | 0.163943   | 0.413358  |
| 17072 | 10467744 | <a href="#">NM_018780</a>          | <a href="#">54612</a>     | secreted frizzled-related sequ  | <a href="#">Sfrp5</a>              | 0.877 | -1.875 | 0.101633   | 0.312332  |
| 17073 | 10377889 | <a href="#">NM_001045959</a>       | <a href="#">50932</a>     | misshapen-like kinase 1 (zebra  | <a href="#">Mink1</a>              | 0.877 | -3.556 | 0.00881744 | 0.0620832 |
| 17074 | 10516079 | <a href="#">AK081449</a>           | <a href="#">100038759</a> | predicted gene, ENSMUSG0000005  | <a href="#">ENSMUSG00000055050</a> | 0.877 | -1.501 | 0.175879   | 0.429588  |
| 17075 | 10418846 | <a href="#">AK132190</a>           | <a href="#">432836</a>    | RIKEN cDNA 3425401B19 gene      | <a href="#">3425401B19Rik</a>      | 0.877 | -2.487 | 0.040823   | 0.176156  |
| 17076 | 10572865 | <a href="#">NM_027837</a>          | <a href="#">71597</a>     | intestine specific homeobox     | <a href="#">Isx</a>                | 0.877 | -1.386 | 0.207175   | 0.47163   |
| 17077 | 10601062 | <a href="#">NM_016747</a>          | <a href="#">53310</a>     | discs, large homolog 3 (Drosop  | <a href="#">Dlg3</a>               | 0.877 | -2.397 | 0.0466308  | 0.19193   |
| 17078 | 10560474 | <a href="#">BC096372</a>           | <a href="#">232941</a>    | expressed sequence C79127       | <a href="#">C79127</a>             | 0.877 | -1.016 | 0.342368   | 0.616776  |

|       |          |                                    |                           |                                 |                                    |       |        |            |           |
|-------|----------|------------------------------------|---------------------------|---------------------------------|------------------------------------|-------|--------|------------|-----------|
| 17079 | 10569370 | <a href="#">NM_009377</a>          | <a href="#">21823</a>     | tyrosine hydroxylase            | <a href="#">Th</a>                 | 0.876 | -1.217 | 0.261793   | 0.536245  |
| 17080 | 10562084 | <a href="#">BC118934</a>           | <a href="#">71909</a>     | RIKEN cDNA 2310022K01 gene      | <a href="#">2310022K01Rik</a>      | 0.876 | -1.224 | 0.259406   | 0.533772  |
| 17081 | 10460055 |                                    |                           |                                 |                                    | 0.876 | -1.275 | 0.241977   | 0.514828  |
| 17082 | 10561178 | <a href="#">NM_029391</a>          | <a href="#">19342</a>     | RAB4B, member RAS oncogene fam  | <a href="#">Rab4b</a>              | 0.876 | -2.222 | 0.0605645  | 0.226995  |
| 17083 | 10514956 | <a href="#">NM_011327</a>          | <a href="#">20280</a>     | sterol carrier protein 2, live  | <a href="#">Sep2</a>               | 0.876 | -2.171 | 0.0654275  | 0.238533  |
| 17084 | 10488372 | <a href="#">XR_002266</a>          | <a href="#">668919</a>    | similar to ribosomal protein L  | <a href="#">LOC668919</a>          | 0.876 | -1.352 | 0.217167   | 0.484774  |
| 17085 | 10533474 | <a href="#">BC019498</a>           | <a href="#">68948</a>     | RIKEN cDNA 1500011H22 gene      | <a href="#">1500011H22Rik</a>      | 0.876 | -2.829 | 0.0246588  | 0.126244  |
| 17086 | 10581750 | <a href="#">NM_181549</a>          | <a href="#">353287</a>    | mannose receptor-like precursor | <a href="#">Mrel</a>               | 0.876 | -1.542 | 0.165743   | 0.416207  |
| 17087 | 10495197 | <a href="#">ENSMUST00000098749</a> | <a href="#">100038499</a> | predicted gene, ENSMUSG0000007  | <a href="#">ENSMUSG00000074335</a> | 0.876 | -1.689 | 0.133837   | 0.368663  |
| 17088 | 10585410 | <a href="#">BC116842</a>           | <a href="#">244885</a>    | RIKEN cDNA 4933412E14 gene      | <a href="#">4933412E14Rik</a>      | 0.876 | -1.232 | 0.256555   | 0.530783  |
| 17089 | 10380244 | <a href="#">ENSMUST00000037268</a> | <a href="#">74297</a>     | RIKEN cDNA 1700106J16 gene      | <a href="#">1700106J16Rik</a>      | 0.876 | -1.276 | 0.241673   | 0.514457  |
| 17090 | 10434252 | <a href="#">NM_010435</a>          | <a href="#">15260</a>     | histone cell cycle regulation   | <a href="#">Hira</a>               | 0.876 | -1.989 | 0.0857625  | 0.281088  |
| 17091 | 10549200 | <a href="#">NM_011444</a>          | <a href="#">20678</a>     | SRY-box containing gene 5       | <a href="#">Sox5</a>               | 0.876 | -1.885 | 0.100224   | 0.309678  |
| 17092 | 10421394 | <a href="#">ENSMUST00000116455</a> | <a href="#">239170</a>    | retinoic acid induced 16        | <a href="#">Rai16</a>              | 0.876 | -1.931 | 0.0936084  | 0.296784  |
| 17093 | 10380721 | <a href="#">NM_146027</a>          | <a href="#">217140</a>    | secernin 2                      | <a href="#">Scrn2</a>              | 0.876 | -2.446 | 0.0433866  | 0.183115  |
| 17094 | 10569168 | <a href="#">NM_026646</a>          | <a href="#">68267</a>     | solute carrier family 25 (mito  | <a href="#">Slc25a22</a>           | 0.876 | -1.85  | 0.10553    | 0.320207  |
| 17095 | 10520351 | <a href="#">NM_207282</a>          | <a href="#">403186</a>    | RIKEN cDNA B930011P16 gene      | <a href="#">B930011P16Rik</a>      | 0.876 | -1.748 | 0.122775   | 0.350597  |
| 17096 | 10351063 |                                    |                           |                                 |                                    | 0.876 | -1.721 | 0.127586   | 0.35821   |
| 17097 | 10563407 | <a href="#">NM_145963</a>          | <a href="#">211480</a>    | potassium inwardly-rectifying   | <a href="#">Kcnj14</a>             | 0.876 | -1.203 | 0.267022   | 0.541627  |
| 17098 | 10437936 | <a href="#">ENSMUST00000063394</a> | <a href="#">442816</a>    | RIKEN cDNA F830005K03 gene      | <a href="#">F830005K03Rik</a>      | 0.876 | -1.087 | 0.312039   | 0.588349  |
| 17099 | 10431311 | <a href="#">NM_172818</a>          | <a href="#">239591</a>    | tubulin tyrosine ligase-like f  | <a href="#">Ttll8</a>              | 0.876 | -2.112 | 0.0713976  | 0.250978  |
| 17100 | 10430389 | <a href="#">NM_008595</a>          | <a href="#">17305</a>     | MFNG O-fucosylpeptide 3-beta-N  | <a href="#">Mfng</a>               | 0.876 | -1.584 | 0.15598    | 0.401839  |
| 17101 | 10494306 | <a href="#">NM_008562</a>          | <a href="#">17210</a>     | myeloid cell leukemia sequence  | <a href="#">Mcl1</a>               | 0.876 | -2.377 | 0.0480482  | 0.195635  |
| 17102 | 10560911 | <a href="#">NM_010261</a>          | <a href="#">14470</a>     | Rab acceptor 1 (prenylated)     | <a href="#">Rabac1</a>             | 0.876 | -2.058 | 0.0774319  | 0.264238  |
| 17103 | 10540880 | <a href="#">NM_001111015</a>       | <a href="#">20965</a>     | synapsin II                     | <a href="#">Syn2</a>               | 0.876 | -1.915 | 0.0958318  | 0.301049  |
| 17104 | 10483648 | <a href="#">NM_025942</a>          | <a href="#">67059</a>     | Obg-like ATPase 1               | <a href="#">Ola1</a>               | 0.876 | -2.332 | 0.0513898  | 0.204746  |
| 17105 | 10490852 |                                    |                           |                                 |                                    | 0.876 | -1.567 | 0.159925   | 0.407256  |
| 17106 | 10400189 | <a href="#">XR_030785</a>          | <a href="#">636070</a>    | similar to hCG1992406           | <a href="#">LOC636070</a>          | 0.876 | -2.021 | 0.0818226  | 0.273224  |
| 17107 | 10592652 | <a href="#">AK035675</a>           | <a href="#">442822</a>    | RIKEN cDNA 9530085L02 gene      | <a href="#">9530085L02Rik</a>      | 0.876 | -1.401 | 0.20261    | 0.465349  |
| 17108 | 10425211 | <a href="#">NM_013847</a>          | <a href="#">26912</a>     | glycine C-acetyltransferase (2  | <a href="#">Geat</a>               | 0.876 | -1.656 | 0.140526   | 0.379231  |
| 17109 | 10449935 | <a href="#">NM_207245</a>          | <a href="#">240066</a>    | cDNA sequence BC066107          | <a href="#">BC066107</a>           | 0.876 | -2.298 | 0.054111   | 0.211405  |
| 17110 | 10595443 | <a href="#">AK034076</a>           | <a href="#">442799</a>    | RIKEN cDNA 9330154J02 gene      | <a href="#">9330154J02Rik</a>      | 0.876 | -1.522 | 0.170626   | 0.422304  |
| 17111 | 10420675 | <a href="#">NM_172810</a>          | <a href="#">239134</a>    | guanylate cyclase 1, soluble,   | <a href="#">Gucy1b2</a>            | 0.876 | -2.195 | 0.0631227  | 0.232827  |
| 17112 | 10523195 | <a href="#">BC089377</a>           | <a href="#">381650</a>    | THAP domain containing 6        | <a href="#">Thap6</a>              | 0.876 | -1.662 | 0.139285   | 0.377524  |
| 17113 | 10530787 | <a href="#">NM_173765</a>          | <a href="#">231326</a>    | aminoadipate-semialdehyde dehy  | <a href="#">Aasdh</a>              | 0.876 | -2.447 | 0.0433328  | 0.182953  |
| 17114 | 10558049 | <a href="#">NM_001080963</a>       | <a href="#">381925</a>    | phosphatidic acid phosphatase   | <a href="#">Ppapdc1a</a>           | 0.876 | -1.251 | 0.250047   | 0.524217  |
| 17115 | 10527508 | <a href="#">NM_153599</a>          | <a href="#">264064</a>    | cyclin-dependent kinase 8       | <a href="#">Cdk8</a>               | 0.876 | -3.113 | 0.0163804  | 0.0961431 |
| 17116 | 10381539 | <a href="#">NM_175935</a>          | <a href="#">68401</a>     | glucose 6 phosphatase, catalyt  | <a href="#">G6pc3</a>              | 0.876 | -3.477 | 0.00983051 | 0.0672657 |
| 17117 | 10446619 | <a href="#">NM_010867</a>          | <a href="#">17929</a>     | myomesin 1                      | <a href="#">Myom1</a>              | 0.876 | -0.291 | 0.779117   | 0.910184  |
| 17118 | 10551464 |                                    |                           |                                 |                                    | 0.876 | -2.666 | 0.0312997  | 0.147889  |
| 17119 | 10481337 | <a href="#">NM_001085514</a>       | <a href="#">329375</a>    | RIKEN cDNA 1700101E01 gene      | <a href="#">1700101E01Rik</a>      | 0.876 | -1.806 | 0.112589   | 0.332345  |
| 17120 | 10464342 | <a href="#">NM_178689</a>          | <a href="#">226265</a>    | RIKEN cDNA 6430537H07 gene      | <a href="#">6430537H07Rik</a>      | 0.875 | -2.485 | 0.0409108  | 0.176312  |
| 17121 | 10348932 | <a href="#">NM_026250</a>          | <a href="#">252876</a>    | zinc finger, H2C2 domain conta  | <a href="#">Zh2c2</a>              | 0.875 | -1.761 | 0.120429   | 0.346759  |
| 17122 | 10440734 | <a href="#">XM_925173</a>          | <a href="#">640684</a>    | hypothetical protein LOC640684  | <a href="#">LOC640684</a>          | 0.875 | -1.149 | 0.287393   | 0.563017  |
| 17123 | 10606728 | <a href="#">ENSMUST00000096324</a> | <a href="#">100038691</a> | predicted gene, ENSMUSG0000007  | <a href="#">ENSMUSG00000071690</a> | 0.875 | -1.375 | 0.210439   | 0.475962  |
| 17124 | 10457221 |                                    |                           |                                 |                                    | 0.875 | -1.523 | 0.170434   | 0.422073  |
| 17125 | 10370644 | <a href="#">NM_001042710</a>       | <a href="#">73106</a>     | protease, serine-like 1         | <a href="#">Prss11</a>             | 0.875 | -2.351 | 0.0499335  | 0.20095   |
| 17126 | 10493670 | <a href="#">ENSMUST00000029548</a> | <a href="#">77595</a>     | nucleoporin 210-like            | <a href="#">Nup210l</a>            | 0.875 | -1.357 | 0.215568   | 0.482734  |
| 17127 | 10454953 | <a href="#">NM_028036</a>          | <a href="#">71983</a>     | transmembrane and coiled-coil   | <a href="#">Tmco6</a>              | 0.875 | -3.047 | 0.0179838  | 0.101919  |
| 17128 | 10589911 |                                    |                           |                                 |                                    | 0.875 | -2.603 | 0.0343492  | 0.157     |

|       |          |                                    |                        |                                     |                                    |       |        |            |           |
|-------|----------|------------------------------------|------------------------|-------------------------------------|------------------------------------|-------|--------|------------|-----------|
| 17129 | 10556216 | <a href="#">NM_181517</a>          | <a href="#">233726</a> | importin 7                          | <a href="#">Ipo7</a>               | 0.875 | -2.195 | 0.0631241  | 0.232827  |
| 17130 | 10414651 | <a href="#">NM_001033805</a>       | <a href="#">619301</a> | RIKEN cDNA G630016D24 gene          | <a href="#">G630016D24Rik</a>      | 0.875 | -2.513 | 0.0392507  | 0.171896  |
| 17131 | 10365208 | <a href="#">NM_001024626</a>       | <a href="#">408062</a> | cDNA sequence BC062115              | <a href="#">BC062115</a>           | 0.875 | -2.558 | 0.0367446  | 0.164082  |
| 17132 | 10389062 | <a href="#">NM_001033765</a>       | <a href="#">237880</a> | RIKEN cDNA 1700071K01 gene          | <a href="#">1700071K01Rik</a>      | 0.875 | -2.223 | 0.0605186  | 0.22695   |
| 17133 | 10426581 | <a href="#">BC090621</a>           | <a href="#">239650</a> | expressed sequence AI836003         | <a href="#">AI836003</a>           | 0.875 | -1.118 | 0.299527   | 0.575641  |
| 17134 | 10593473 | <a href="#">BC120857</a>           | <a href="#">69809</a>  | RIKEN cDNA 1810046K07 gene          | <a href="#">1810046K07Rik</a>      | 0.875 | -1.181 | 0.275147   | 0.550034  |
| 17135 | 10428842 | <a href="#">NM_175151</a>          | <a href="#">69694</a>  | TatD DNase domain containing 1      | <a href="#">Tatdn1</a>             | 0.875 | -2.723 | 0.0288009  | 0.139479  |
| 17136 | 10526391 | <a href="#">NM_021403</a>          | <a href="#">58212</a>  | RIKEN cDNA 2900083I11 gene          | <a href="#">2900083I11Rik</a>      | 0.875 | -1.746 | 0.123085   | 0.351101  |
| 17137 | 10379068 | <a href="#">NM_009143</a>          | <a href="#">20316</a>  | stromal cell derived factor 2       | <a href="#">Sdf2</a>               | 0.875 | -2.18  | 0.0644815  | 0.236295  |
| 17138 | 10605315 | <a href="#">NM_025410</a>          | <a href="#">66192</a>  | L antigen family, member 3          | <a href="#">Lage3</a>              | 0.875 | -2.545 | 0.0374645  | 0.166652  |
| 17139 | 10554900 | <a href="#">NM_011807</a>          | <a href="#">23859</a>  | discs, large homolog 2 (Drosop      | <a href="#">Dlg2</a>               | 0.875 | -0.779 | 0.460547   | 0.715069  |
| 17140 | 10410695 | <a href="#">NM_028493</a>          | <a href="#">73296</a>  | Rho-related BTB domain contain      | <a href="#">Rhobtb3</a>            | 0.875 | -2.714 | 0.0291708  | 0.140658  |
| 17141 | 10476319 |                                    |                        |                                     |                                    | 0.875 | -1.812 | 0.111603   | 0.330541  |
| 17142 | 10446739 | <a href="#">NM_030179</a>          | <a href="#">78785</a>  | CAP-GLY domain containing link      | <a href="#">Clip4</a>              | 0.875 | -2.023 | 0.0816106  | 0.272821  |
| 17143 | 10566186 | <a href="#">NM_147085</a>          | <a href="#">259089</a> | olfactory receptor 571              | <a href="#">Olf1571</a>            | 0.875 | -0.977 | 0.36019    | 0.632213  |
| 17144 | 10458804 | <a href="#">ENSMUST00000116061</a> | <a href="#">225468</a> | predicted gene, EG225468            | <a href="#">EG225468</a>           | 0.875 | -1.842 | 0.106857   | 0.322408  |
| 17145 | 10539015 | <a href="#">XR_034118</a>          | <a href="#">668034</a> | similar to Ribosomal protein L      | <a href="#">LOC668034</a>          | 0.875 | -0.925 | 0.385104   | 0.654297  |
| 17146 | 10465278 | <a href="#">NM_026772</a>          | <a href="#">104252</a> | CDC42 effector protein (Rho GT      | <a href="#">Cdc42ep2</a>           | 0.875 | -1.565 | 0.160295   | 0.40761   |
| 17147 | 10485070 | <a href="#">NM_010784</a>          | <a href="#">17242</a>  | midkine                             | <a href="#">Mdk</a>                | 0.875 | -2.975 | 0.0199701  | 0.109789  |
| 17148 | 10371811 | <a href="#">NM_198021</a>          | <a href="#">213326</a> | SCY1-like 2 (S. cerevisiae)         | <a href="#">Scyl2</a>              | 0.875 | -3.199 | 0.0144939  | 0.0882145 |
| 17149 | 10574944 | <a href="#">NM_025518</a>          | <a href="#">66369</a>  | dihydrouridine synthase 2-like      | <a href="#">Dus2l</a>              | 0.875 | -1.246 | 0.251708   | 0.525589  |
| 17150 | 10587854 | <a href="#">NM_177909</a>          | <a href="#">331004</a> | solute carrier family 9 (sodiu      | <a href="#">Slc9a9</a>             | 0.875 | -1.528 | 0.169133   | 0.42056   |
| 17151 | 10371134 | <a href="#">NM_148951</a>          | <a href="#">209047</a> | GIPC PDZ domain containing          | <a href="#">Gipc3</a>              | 0.875 | -1.201 | 0.267812   | 0.542576  |
| 17152 | 10495257 | <a href="#">ENSMUST00000070502</a> | <a href="#">791415</a> | fam. predicted gene, OTTMUSG0000000 | <a href="#">OTTMUSG0000007191</a>  | 0.875 | -1.537 | 0.16698    | 0.417902  |
| 17153 | 10398350 |                                    |                        |                                     |                                    | 0.875 | -2.246 | 0.0584926  | 0.22232   |
| 17154 | 10450325 | <a href="#">NM_008198</a>          | <a href="#">14962</a>  | complement factor B                 | <a href="#">Cfb</a>                | 0.875 | -1.89  | 0.0994893  | 0.30816   |
| 17155 | 10588091 | <a href="#">NM_023873</a>          | <a href="#">68121</a>  | centrosomal protein 70              | <a href="#">Cep70</a>              | 0.875 | -2.078 | 0.0750896  | 0.259103  |
| 17156 | 10562605 | <a href="#">BC099396</a>           | <a href="#">233168</a> | expressed sequence AI987944         | <a href="#">AI987944</a>           | 0.875 | -2.149 | 0.0675538  | 0.242768  |
| 17157 | 10454771 | <a href="#">NM_144865</a>          | <a href="#">225362</a> | receptor accessory protein 2        | <a href="#">Reep2</a>              | 0.875 | -1.135 | 0.292709   | 0.568741  |
| 17158 | 10390211 | <a href="#">NM_009951</a>          | <a href="#">140486</a> | insulin-like growth factor 2 m      | <a href="#">Igf2bp1</a>            | 0.874 | -2.05  | 0.0783765  | 0.266396  |
| 17159 | 10558325 | <a href="#">NM_025392</a>          | <a href="#">66165</a>  | BRCA2 and CDKN1A interacting p      | <a href="#">Bccip</a>              | 0.874 | -2.623 | 0.0333833  | 0.154129  |
| 17160 | 10413377 |                                    |                        |                                     |                                    | 0.874 | -1.682 | 0.135105   | 0.370617  |
| 17161 | 10371240 | <a href="#">NM_053254</a>          | <a href="#">114606</a> | transducin-like enhancer of sp      | <a href="#">Tle6</a>               | 0.874 | -2.285 | 0.055116   | 0.214183  |
| 17162 | 10583929 | <a href="#">NM_029792</a>          | <a href="#">76898</a>  | beta-1,3-glucuronyltransferase      | <a href="#">B3gat1</a>             | 0.874 | -1.694 | 0.132919   | 0.366563  |
| 17163 | 10469143 | <a href="#">AK049866</a>           | <a href="#">791351</a> | predicted gene, ENSMUSG0000005      | <a href="#">ENSMUSG00000053987</a> | 0.874 | -1.094 | 0.309151   | 0.585866  |
| 17164 | 10503234 | <a href="#">NM_028940</a>          | <a href="#">74438</a>  | retinaldehyde binding protein       | <a href="#">Rlbp1l1</a>            | 0.874 | -1.685 | 0.134657   | 0.369832  |
| 17165 | 10577994 | <a href="#">XR_001871</a>          | <a href="#">666422</a> | predicted gene, EG666422            | <a href="#">EG666422</a>           | 0.874 | -1.597 | 0.152993   | 0.397015  |
| 17166 | 10352242 | <a href="#">NM_007415</a>          | <a href="#">11545</a>  | poly (ADP-ribose) polymerase f      | <a href="#">Parp1</a>              | 0.874 | -3.557 | 0.00881341 | 0.0620755 |
| 17167 | 10413517 | <a href="#">NM_175343</a>          | <a href="#">218865</a> | choline dehydrogenase               | <a href="#">Chdh</a>               | 0.874 | -2.054 | 0.0778491  | 0.265362  |
| 17168 | 10508721 |                                    |                        |                                     |                                    | 0.874 | -1.079 | 0.315187   | 0.59212   |
| 17169 | 10429944 | <a href="#">NM_130893</a>          | <a href="#">170729</a> | scratch homolog 1, zinc finger      | <a href="#">Sert1</a>              | 0.874 | -1.762 | 0.120114   | 0.346527  |
| 17170 | 10394971 | <a href="#">NM_178357</a>          | <a href="#">194655</a> | Kruppel-like factor 11              | <a href="#">Klf11</a>              | 0.874 | -2.031 | 0.0806473  | 0.270969  |
| 17171 | 10398396 |                                    |                        |                                     |                                    | 0.874 | -1.058 | 0.324203   | 0.600678  |
| 17172 | 10359982 | <a href="#">NM_001081304</a>       | <a href="#">226641</a> | activating transcription facto      | <a href="#">Atf6</a>               | 0.874 | -2.663 | 0.031438   | 0.148244  |
| 17173 | 10347552 | <a href="#">NM_011494</a>          | <a href="#">20872</a>  | serine/threonine kinase 16          | <a href="#">Stk16</a>              | 0.874 | -2.858 | 0.0236308  | 0.122403  |
| 17174 | 10598180 | <a href="#">BC085271</a>           | <a href="#">434632</a> | cDNA sequence BC085271              | <a href="#">BC085271</a>           | 0.874 | -2.529 | 0.0383632  | 0.169307  |
| 17175 | 10490028 | <a href="#">NM_009564</a>          | <a href="#">22722</a>  | zinc finger protein 64              | <a href="#">Zfp64</a>              | 0.874 | -2.891 | 0.022548   | 0.118743  |
| 17176 | 10415645 | <a href="#">NM_026401</a>          | <a href="#">67840</a>  | mitochondrial ribosomal protei      | <a href="#">Mrp63</a>              | 0.874 | -3.149 | 0.0155654  | 0.0926823 |
| 17177 | 10481619 |                                    |                        |                                     |                                    | 0.874 | -2.278 | 0.0557071  | 0.215491  |
| 17178 | 10433618 | <a href="#">ENSMUST00000023138</a> | <a href="#">72555</a>  | RIKEN cDNA 2700045P11 gene          | <a href="#">2700045P11Rik</a>      | 0.874 | -1.407 | 0.176761   | 0.430877  |

|       |          |                                    |                           |                                   |                                    |       |        |           |           |
|-------|----------|------------------------------------|---------------------------|-----------------------------------|------------------------------------|-------|--------|-----------|-----------|
| 17176 | 10455016 | <a href="#">ENSMUST00000029139</a> | <a href="#">72353</a>     | RIKEN cDNA 270075111 gene         | <a href="#">270075111Rik</a>       | 0.874 | -1.477 | 0.170701  | 0.430877  |
| 17179 | 10363551 | <a href="#">NM_009314</a>          | <a href="#">21337</a>     | tachykinin receptor 2             | <a href="#">Tacr2</a>              | 0.874 | -1.122 | 0.297716  | 0.5738    |
| 17180 | 10376017 | <a href="#">ENSMUST00000067523</a> | <a href="#">791266</a>    | predicted gene,<br>ENSMUSG0000005 | <a href="#">ENSMUSG00000054450</a> | 0.874 | -1.077 | 0.315978  | 0.592922  |
| 17181 | 10560304 | <a href="#">NM_007590</a>          | <a href="#">12315</a>     | calmodulin 3                      | <a href="#">Calm3</a>              | 0.874 | -2.905 | 0.0220935 | 0.117082  |
| 17182 | 10386020 | <a href="#">NM_153170</a>          | <a href="#">246049</a>    | solute carrier family 36 (prot    | <a href="#">Slc36a2</a>            | 0.874 | -1.356 | 0.215949  | 0.483023  |
| 17183 | 10543737 | <a href="#">NM_017478</a>          | <a href="#">54160</a>     | coatomer protein complex, subu    | <a href="#">Copp2</a>              | 0.874 | -2.422 | 0.0449766 | 0.187645  |
| 17184 | 10428074 | <a href="#">NM_009083</a>          | <a href="#">19946</a>     | ribosomal protein L30             | <a href="#">Rpl30</a>              | 0.874 | -2.143 | 0.0681359 | 0.243952  |
| 17185 | 10548011 | <a href="#">NM_198604</a>          | <a href="#">213522</a>    | pleckstrin homology domain con    | <a href="#">Plekhg6</a>            | 0.874 | -1.637 | 0.144429  | 0.385726  |
| 17186 | 10560719 | <a href="#">NM_027308</a>          | <a href="#">70080</a>     | RIKEN cDNA 2210010C17<br>gene     | <a href="#">2210010C17Rik</a>      | 0.874 | -1.578 | 0.157428  | 0.404021  |
| 17187 | 10467216 | <a href="#">NM_198300</a>          | <a href="#">208922</a>    | cytoplasmic polyadenylation el    | <a href="#">Cpeb3</a>              | 0.874 | -2.081 | 0.0748515 | 0.258816  |
| 17188 | 10515095 | <a href="#">NM_010488</a>          | <a href="#">15572</a>     | ELAV (embryonic lethal,<br>abnorm | <a href="#">Elavl4</a>             | 0.874 | -1.557 | 0.162108  | 0.410473  |
| 17189 | 10389865 | <a href="#">NM_008704</a>          | <a href="#">18102</a>     | non-metastatic cells 1, protei    | <a href="#">Nme1</a>               | 0.874 | -2.529 | 0.0383531 | 0.169298  |
| 17190 | 10554367 | <a href="#">NM_008589</a>          | <a href="#">17293</a>     | mesoderm posterior 2              | <a href="#">Mesp2</a>              | 0.874 | -1.789 | 0.115539  | 0.337938  |
| 17191 | 10511879 |                                    |                           |                                   |                                    | 0.874 | -2.373 | 0.048355  | 0.196543  |
| 17192 | 10386368 | <a href="#">AK137066</a>           | <a href="#">67862</a>     | RIKEN cDNA 2310033P09 gene        | <a href="#">2310033P09Rik</a>      | 0.874 | -3.406 | 0.0108471 | 0.0716946 |
| 17193 | 10347728 | <a href="#">XR_030663</a>          | <a href="#">100039137</a> | similar to Ac2-210                | <a href="#">LOC100039137</a>       | 0.874 | -2.154 | 0.0671067 | 0.241886  |
| 17194 | 10410617 | <a href="#">NM_011051</a>          | <a href="#">18570</a>     | programmed cell death 6           | <a href="#">Pcdcd6</a>             | 0.874 | -1.887 | 0.0998289 | 0.308845  |
| 17195 | 10457235 | <a href="#">NM_178722</a>          | <a href="#">240186</a>    | zinc finger protein 438           | <a href="#">Zfp438</a>             | 0.874 | -1.687 | 0.134239  | 0.369304  |
| 17196 | 10385384 | <a href="#">BC139819</a>           | <a href="#">214112</a>    | RIKEN cDNA 9530066K23<br>gene     | <a href="#">9530066K23Rik</a>      | 0.874 | -1.453 | 0.188361  | 0.446391  |
| 17197 | 10580274 | <a href="#">NM_027187</a>          | <a href="#">69724</a>     | ribonuclease H2, large subunit    | <a href="#">Rnaseh2a</a>           | 0.874 | -2.042 | 0.0793095 | 0.268093  |
| 17198 | 10470649 | <a href="#">NM_009442</a>          | <a href="#">22130</a>     | transcription termination fact    | <a href="#">Ttf1</a>               | 0.874 | -2.301 | 0.0538603 | 0.210688  |
| 17199 | 10549655 | <a href="#">NM_026146</a>          | <a href="#">67425</a>     | EPS8-like 1                       | <a href="#">Eps8l1</a>             | 0.874 | -1.973 | 0.0879176 | 0.285594  |
| 17200 | 10358124 | <a href="#">NM_019645</a>          | <a href="#">18772</a>     | plakophilin 1                     | <a href="#">Pkp1</a>               | 0.874 | -1.941 | 0.0922007 | 0.294263  |
| 17201 | 10452248 | <a href="#">NM_175333</a>          | <a href="#">103775</a>    | solute carrier family 25, memb    | <a href="#">Slc25a4l</a>           | 0.874 | -1.611 | 0.149999  | 0.393007  |
| 17202 | 10423821 | <a href="#">NM_080640</a>          | <a href="#">118452</a>    | brain and acute leukemia, cyto    | <a href="#">Baalc</a>              | 0.874 | -0.73  | 0.488406  | 0.736055  |
| 17203 | 10449657 | <a href="#">NM_011575</a>          | <a href="#">21786</a>     | trefoil factor 3, intestinal      | <a href="#">Tff3</a>               | 0.874 | -2.399 | 0.0465058 | 0.191643  |
| 17204 | 10553993 | <a href="#">NM_021336</a>          | <a href="#">68981</a>     | small nuclear ribonucleoprotei    | <a href="#">Snrpa1</a>             | 0.874 | -2.798 | 0.0257969 | 0.130148  |
| 17205 | 10452442 |                                    |                           |                                   |                                    | 0.873 | -1.057 | 0.324693  | 0.601113  |
| 17206 | 10536762 | <a href="#">NM_019776</a>          | <a href="#">56463</a>     | staphylococcal nuclease and tu    | <a href="#">Snd1</a>               | 0.873 | -3.005 | 0.0191023 | 0.106344  |
| 17207 | 10399605 | <a href="#">NM_009615</a>          | <a href="#">11491</a>     | a disintegrin and metallopepti    | <a href="#">Adam17</a>             | 0.873 | -2.439 | 0.0438088 | 0.1843    |
| 17208 | 10510980 |                                    |                           |                                   |                                    | 0.873 | -1.23  | 0.257253  | 0.53155   |
| 17209 | 10348000 | <a href="#">ENSMUST00000027429</a> | <a href="#">72792</a>     | RIKEN cDNA 2810459M11<br>gene     | <a href="#">2810459M11Rik</a>      | 0.873 | -2.176 | 0.0649321 | 0.237571  |
| 17210 | 10398934 | <a href="#">AK033757</a>           | <a href="#">791402</a>    | predicted gene,<br>ENSMUSG0000005 | <a href="#">ENSMUSG00000051997</a> | 0.873 | -2.078 | 0.075115  | 0.259134  |
| 17211 | 10450365 |                                    |                           |                                   |                                    | 0.873 | -1.673 | 0.136914  | 0.373586  |
| 17212 | 10545682 | <a href="#">ENSMUST00000089622</a> | <a href="#">194388</a>    | tet oncogene family member 3      | <a href="#">Tet3</a>               | 0.873 | -1.766 | 0.119532  | 0.345831  |
| 17213 | 10455294 | <a href="#">ENSMUST00000091927</a> | <a href="#">383348</a>    | potassium channel tetramerisat    | <a href="#">Kctd16</a>             | 0.873 | -1.14  | 0.29084   | 0.567038  |
| 17214 | 10555718 |                                    |                           |                                   |                                    | 0.873 | -1.515 | 0.172406  | 0.42462   |
| 17215 | 10520553 | <a href="#">BC029150</a>           | <a href="#">68796</a>     | RIKEN cDNA 1110039B18<br>gene     | <a href="#">1110039B18Rik</a>      | 0.873 | -2.449 | 0.0431639 | 0.182497  |
| 17216 | 10519136 |                                    |                           |                                   |                                    | 0.873 | -2.414 | 0.045488  | 0.188773  |
| 17217 | 10430572 |                                    |                           |                                   |                                    | 0.873 | -1.264 | 0.245513  | 0.518491  |
| 17218 | 10371307 | <a href="#">NM_010914</a>          | <a href="#">18045</a>     | nuclear transcription factor-Y    | <a href="#">Nfyb</a>               | 0.873 | -2.771 | 0.0268315 | 0.1333    |
| 17219 | 10347910 | <a href="#">NM_025386</a>          | <a href="#">66153</a>     | F-box protein 36                  | <a href="#">Fbxo36</a>             | 0.873 | -2.077 | 0.0752643 | 0.259479  |
| 17220 | 10513266 | <a href="#">NM_146920</a>          | <a href="#">258922</a>    | olfactory receptor 267            | <a href="#">Olfr267</a>            | 0.873 | -1.574 | 0.158136  | 0.405072  |
| 17221 | 10366403 |                                    |                           |                                   |                                    | 0.873 | -1.537 | 0.166983  | 0.417902  |
| 17222 | 10457707 | <a href="#">NM_013504</a>          | <a href="#">13505</a>     | desmocollin 1                     | <a href="#">Dsc1</a>               | 0.873 | -1.384 | 0.207723  | 0.472217  |
| 17223 | 10393264 |                                    |                           |                                   |                                    | 0.873 | -1.123 | 0.297601  | 0.573712  |
| 17224 | 10594967 | <a href="#">NM_001081153</a>       | <a href="#">208898</a>    | unc-13 homolog C (C. elegans)     | <a href="#">Unc13c</a>             | 0.873 | -1.872 | 0.102156  | 0.313496  |
| 17225 | 10407870 | <a href="#">NM_029271</a>          | <a href="#">75398</a>     | mitochondrial ribosomal protei    | <a href="#">Mrpl32</a>             | 0.873 | -2.991 | 0.0194961 | 0.107912  |
| 17226 | 10465826 | <a href="#">AY941793</a>           | <a href="#">107197</a>    | expressed sequence AI462493       | <a href="#">AI462493</a>           | 0.873 | -2.439 | 0.0438382 | 0.184351  |
| 17227 | 10368527 | <a href="#">NM_025798</a>          | <a href="#">66847</a>     | histidine triad nucleotide bin    | <a href="#">Hint3</a>              | 0.873 | -1.505 | 0.174802  | 0.427927  |
| 17228 | 10567750 | <a href="#">NM_207239</a>          | <a href="#">233863</a>    | general transcription factor I    | <a href="#">Gtf3c1</a>             | 0.873 | -3.144 | 0.0156718 | 0.0930276 |
| 17229 | 10531887 | <a href="#">NM_029415</a>          | <a href="#">75750</a>     | solute carrier family 10 (sodi    | <a href="#">Slc10a6</a>            | 0.873 | -3.319 | 0.0122439 | 0.0778362 |

|       |          |                                    |                        |                                |                                    |       |        |           |           |
|-------|----------|------------------------------------|------------------------|--------------------------------|------------------------------------|-------|--------|-----------|-----------|
| 17229 | 10531887 | <a href="#">NM_027413</a>          | <a href="#">17739</a>  | solute carrier family 10 (scl) | <a href="#">Slc10a9</a>            | 0.873 | -3.519 | 0.0122737 | 0.0778302 |
| 17230 | 10347060 | <a href="#">BC116430</a>           | <a href="#">241076</a> | RIKEN cDNA C030018G13 gene     | <a href="#">C030018G13Rik</a>      | 0.873 | -2.502 | 0.0398942 | 0.173636  |
| 17231 | 10574057 |                                    |                        |                                |                                    | 0.873 | -1.6   | 0.152432  | 0.39629   |
| 17232 | 10498319 | <a href="#">NM_030685</a>          | <a href="#">28146</a>  | DNA segment, Chr 3, University | <a href="#">D3Ucla1</a>            | 0.873 | -2.818 | 0.025071  | 0.127643  |
| 17233 | 10464070 | <a href="#">NM_016862</a>          | <a href="#">53611</a>  | vesicle transport through inte | <a href="#">Vti1a</a>              | 0.873 | -2.141 | 0.0683551 | 0.244408  |
| 17234 | 10518455 | <a href="#">NM_009642</a>          | <a href="#">11610</a>  | angiotensin II, type I recepto | <a href="#">Agtrap</a>             | 0.873 | -1.924 | 0.0944821 | 0.298436  |
| 17235 | 10409170 | <a href="#">NM_015759</a>          | <a href="#">30938</a>  | FYVE, RhoGEF and PH domain con | <a href="#">Fgd3</a>               | 0.872 | -1.528 | 0.169149  | 0.42056   |
| 17236 | 10556701 | <a href="#">NM_178758</a>          | <a href="#">272428</a> | acyl-CoA synthetase medium-cha | <a href="#">Acsm5</a>              | 0.872 | -0.997 | 0.351101  | 0.624551  |
| 17237 | 10460732 | <a href="#">NM_013859</a>          | <a href="#">29805</a>  | zinc finger, HIT domain contai | <a href="#">Znhit2</a>             | 0.872 | -2.034 | 0.0802718 | 0.270212  |
| 17238 | 10507299 | <a href="#">NM_029868</a>          | <a href="#">77110</a>  | GC-rich promoter binding prote | <a href="#">Gpbp111</a>            | 0.872 | -2.813 | 0.0252345 | 0.128136  |
| 17239 | 10536908 | <a href="#">NM_146173</a>          | <a href="#">232670</a> | tetraspanin 33                 | <a href="#">Tspan33</a>            | 0.872 | -1.958 | 0.089813  | 0.289247  |
| 17240 | 10429391 | <a href="#">NM_001033219</a>       | <a href="#">106068</a> | solute carrier family 45, memb | <a href="#">Slc45a4</a>            | 0.872 | -1.061 | 0.322838  | 0.599569  |
| 17241 | 10379013 | <a href="#">NM_008028</a>          | <a href="#">14252</a>  | flotillin 2                    | <a href="#">Flot2</a>              | 0.872 | -2.468 | 0.0420083 | 0.17915   |
| 17242 | 10541098 | <a href="#">NM_001001792</a>       | <a href="#">22685</a>  | zinc finger protein 239        | <a href="#">Zfp239</a>             | 0.872 | -2.14  | 0.0684767 | 0.244681  |
| 17243 | 10503123 | <a href="#">NM_026534</a>          | <a href="#">68053</a>  | RIKEN cDNA 3110003A22 gene     | <a href="#">3110003A22Rik</a>      | 0.872 | -1.934 | 0.0931035 | 0.295671  |
| 17244 | 10429802 | <a href="#">NM_011117</a>          | <a href="#">18810</a>  | plectin 1                      | <a href="#">Plec1</a>              | 0.872 | -3.133 | 0.0159214 | 0.0941049 |
| 17245 | 10430679 |                                    |                        |                                |                                    | 0.872 | -0.547 | 0.601103  | 0.812694  |
| 17246 | 10478875 | <a href="#">NM_030743</a>          | <a href="#">81018</a>  | zinc finger protein 313        | <a href="#">Zfp313</a>             | 0.872 | -2.398 | 0.046609  | 0.191881  |
| 17247 | 10364112 | <a href="#">NM_198635</a>          | <a href="#">333669</a> | predicted gene, EG333669       | <a href="#">EG333669</a>           | 0.872 | -2.258 | 0.057396  | 0.219375  |
| 17248 | 10375956 | <a href="#">NM_177059</a>          | <a href="#">320027</a> | follistatin-like 4             | <a href="#">Fstl4</a>              | 0.872 | -2.093 | 0.0734501 | 0.255968  |
| 17249 | 10434930 | <a href="#">ENSMUST00000061675</a> | <a href="#">75531</a>  | RIKEN cDNA 1700025H01 gene     | <a href="#">1700025H01Rik</a>      | 0.872 | -1.105 | 0.304562  | 0.581092  |
| 17250 | 10484820 | <a href="#">NM_146970</a>          | <a href="#">258972</a> | olfactory receptor 1239        | <a href="#">Olfr1239</a>           | 0.872 | -1.72  | 0.127786  | 0.35851   |
| 17251 | 10546079 | <a href="#">NM_013493</a>          | <a href="#">12785</a>  | cellular nucleic acid binding  | <a href="#">Cnbp</a>               | 0.872 | -1.837 | 0.107581  | 0.323293  |
| 17252 | 10383200 | <a href="#">ENSMUST00000093902</a> | <a href="#">672511</a> | hypothetical LOC672511         | <a href="#">LOC672511</a>          | 0.872 | -0.862 | 0.416311  | 0.67936   |
| 17253 | 10439547 | <a href="#">NM_153528</a>          | <a href="#">207798</a> | GRAM domain containing 1C      | <a href="#">Gram1c</a>             | 0.872 | -1.281 | 0.239813  | 0.512804  |
| 17254 | 10363917 | <a href="#">XR_032177</a>          | <a href="#">544705</a> | similar to HNRPA2B1 protein    | <a href="#">LOC544705</a>          | 0.872 | -1.727 | 0.126471  | 0.356138  |
| 17255 | 10423386 | <a href="#">ENSMUST00000064878</a> | <a href="#">791316</a> | predicted gene, ENSMUSG0000005 | <a href="#">ENSMUSG00000052811</a> | 0.872 | -1.382 | 0.208392  | 0.473025  |
| 17256 | 10375443 | <a href="#">NM_134250</a>          | <a href="#">171285</a> | hepatitis A virus cellular rec | <a href="#">Havcr2</a>             | 0.872 | -1.675 | 0.136546  | 0.373015  |
| 17257 | 10472384 | <a href="#">NM_001099298</a>       | <a href="#">110876</a> | sodium channel, voltage-gated, | <a href="#">Scn2a1</a>             | 0.872 | -1.478 | 0.181595  | 0.437813  |
| 17258 | 10465726 | <a href="#">BC014805</a>           | <a href="#">236149</a> | cDNA sequence BC014805         | <a href="#">BC014805</a>           | 0.872 | -1.616 | 0.1489    | 0.391148  |
| 17259 | 10569300 | <a href="#">NM_001037822</a>       | <a href="#">114666</a> | keratin associated protein 5-5 | <a href="#">Krtap5-5</a>           | 0.872 | -1.303 | 0.232691  | 0.503682  |
| 17260 | 10396952 | <a href="#">NM_001033149</a>       | <a href="#">69480</a>  | tetratricopeptide repeat domai | <a href="#">Ttc9</a>               | 0.871 | -1.64  | 0.143681  | 0.384361  |
| 17261 | 10563108 | <a href="#">NR_000003</a>          | <a href="#">27211</a>  | RNA, U35a small nucleolar      | <a href="#">Rnu35a</a>             | 0.871 | -2.151 | 0.0673392 | 0.242464  |
| 17262 | 10461459 | <a href="#">NM_173068</a>          | <a href="#">54525</a>  | synaptotagmin VII              | <a href="#">Syt7</a>               | 0.871 | -1.716 | 0.12854   | 0.359524  |
| 17263 | 10463164 | <a href="#">NM_008043</a>          | <a href="#">14296</a>  | frequently rearranged in advan | <a href="#">Frat1</a>              | 0.871 | -2.458 | 0.0426135 | 0.180844  |
| 17264 | 10460146 |                                    |                        |                                |                                    | 0.871 | -0.512 | 0.623728  | 0.828064  |
| 17265 | 10464413 |                                    |                        |                                |                                    | 0.871 | -2.031 | 0.0806338 | 0.270969  |
| 17266 | 10487405 | <a href="#">NM_178047</a>          | <a href="#">192212</a> | prominin 2                     | <a href="#">Prom2</a>              | 0.871 | -1.331 | 0.223627  | 0.493567  |
| 17267 | 10486499 | <a href="#">NM_173734</a>          | <a href="#">211499</a> | transmembrane protein 87A      | <a href="#">Tmem87a</a>            | 0.871 | -3.335 | 0.0119752 | 0.0767053 |
| 17268 | 10470042 | <a href="#">NM_013524</a>          | <a href="#">14347</a>  | fucosyltransferase 7           | <a href="#">Fut7</a>               | 0.871 | -1.91  | 0.0965782 | 0.302436  |
| 17269 | 10562461 | <a href="#">NM_178643</a>          | <a href="#">101831</a> | RIKEN cDNA C230052I12 gene     | <a href="#">C230052I12Rik</a>      | 0.871 | -2.089 | 0.0738989 | 0.256909  |
| 17270 | 10514473 |                                    |                        |                                |                                    | 0.871 | -2.215 | 0.061266  | 0.228427  |
| 17271 | 10526977 | <a href="#">NM_133916</a>          | <a href="#">27979</a>  | eukaryotic translation initiat | <a href="#">Eif3b</a>              | 0.871 | -2.708 | 0.0294344 | 0.141691  |
| 17272 | 10435149 | <a href="#">NM_027226</a>          | <a href="#">69823</a>  | forty-two-three domain contain | <a href="#">Fyttd1</a>             | 0.871 | -2.769 | 0.0269257 | 0.133517  |
| 17273 | 10357454 | <a href="#">NM_177445</a>          | <a href="#">226414</a> | aspartyl-tRNA synthetase       | <a href="#">Dars</a>               | 0.871 | -2.531 | 0.0382443 | 0.168959  |
| 17274 | 10520271 | <a href="#">ENSMUST00000063159</a> | <a href="#">67261</a>  | RIKEN cDNA 2900005J15 gene     | <a href="#">2900005J15Rik</a>      | 0.871 | -2.008 | 0.0833852 | 0.276517  |
| 17275 | 10570951 | <a href="#">ENSMUST00000071588</a> | <a href="#">74561</a>  | NK6 transcription factor relat | <a href="#">Nkx6-3</a>             | 0.871 | -1.674 | 0.136789  | 0.373436  |
| 17276 | 10470388 | <a href="#">BC027257</a>           | <a href="#">381356</a> | RIKEN cDNA 5930434B04 gene     | <a href="#">5930434B04Rik</a>      | 0.871 | -2.465 | 0.0421787 | 0.179731  |
| 17277 | 10557585 | <a href="#">NM_146201</a>          | <a href="#">233887</a> | zinc finger protein 553        | <a href="#">Zfp553</a>             | 0.871 | -1.91  | 0.0964637 | 0.302302  |
| 17278 | 10517703 | <a href="#">XR_034198</a>          | <a href="#">626000</a> | similar to Cyclin D3           | <a href="#">LOC626000</a>          | 0.871 | -0.631 | 0.547222  | 0.778305  |
| 17279 | 10449377 | <a href="#">NM_013891</a>          | <a href="#">30051</a>  | SAM pointed domain containing  | <a href="#">Spdef</a>              | 0.871 | -2.714 | 0.0291831 | 0.140686  |
| 17280 | 10444332 | <a href="#">BC051142</a>           | <a href="#">407788</a> | cDNA sequence BC051142         | <a href="#">BC051142</a>           | 0.871 | -2.382 | 0.0476881 | 0.194656  |

|       |          |                                    |                           |                                   |                                    |       |        |           |           |
|-------|----------|------------------------------------|---------------------------|-----------------------------------|------------------------------------|-------|--------|-----------|-----------|
| 17281 | 10366073 | <a href="#">NM_146009</a>          | <a href="#">216274</a>    | centrosomal protein 290           | <a href="#">Cep290</a>             | 0.871 | -1.801 | 0.1135    | 0.333876  |
| 17282 | 10556749 | <a href="#">NM_178414</a>          | <a href="#">233801</a>    | acyl-CoA synthetase medium-chain  | <a href="#">Acsm4</a>              | 0.871 | -1.497 | 0.176757  | 0.430877  |
| 17283 | 10376396 | <a href="#">NM_001039047</a>       | <a href="#">216781</a>    | tripartite motif-containing 58    | <a href="#">Trim58</a>             | 0.871 | -2.657 | 0.0317385 | 0.149088  |
| 17284 | 10595892 | <a href="#">ENSMUST00000061643</a> | <a href="#">70457</a>     | RIKEN cDNA 2610303G11 gene        | <a href="#">2610303G11Rik</a>      | 0.871 | -1.607 | 0.150877  | 0.394527  |
| 17285 | 10479938 | <a href="#">NM_024208</a>          | <a href="#">67856</a>     | enoyl Coenzyme A hydratase domain | <a href="#">Echdc3</a>             | 0.871 | -2.084 | 0.0744166 | 0.258046  |
| 17286 | 10603843 | <a href="#">NM_013680</a>          | <a href="#">20964</a>     | synapsin I                        | <a href="#">Syn1</a>               | 0.871 | -1.695 | 0.132631  | 0.366293  |
| 17287 | 10559764 | <a href="#">NM_001013012</a>       | <a href="#">67109</a>     | zinc finger protein 787           | <a href="#">Zfp787</a>             | 0.871 | -1.804 | 0.112904  | 0.332876  |
| 17288 | 10572757 | <a href="#">NM_023126</a>          | <a href="#">17274</a>     | RAB8A, member RAS oncogene family | <a href="#">Rab8a</a>              | 0.871 | -1.593 | 0.15397   | 0.398476  |
| 17289 | 10459804 | <a href="#">NM_027721</a>          | <a href="#">71206</a>     | katanin p60 subunit A-like 2      | <a href="#">Katnal2</a>            | 0.871 | -1.588 | 0.154979  | 0.400254  |
| 17290 | 10398173 | <a href="#">NM_011705</a>          | <a href="#">22367</a>     | vaccinia related kinase 1         | <a href="#">Vrk1</a>               | 0.871 | -2.696 | 0.0299461 | 0.143448  |
| 17291 | 10587554 | <a href="#">NM_011627</a>          | <a href="#">21983</a>     | trophoblast glycoprotein          | <a href="#">Tpbp</a>               | 0.871 | -2.146 | 0.0679193 | 0.243363  |
| 17292 | 10499128 | <a href="#">NR_004417</a>          | <a href="#">19870</a>     | U73A small nuclear RNA            | <a href="#">Rnu73a</a>             | 0.871 | -2.328 | 0.0516873 | 0.205505  |
| 17293 | 10567680 | <a href="#">NM_012016</a>          | <a href="#">26918</a>     | endoplasmic reticulum (ER) to     | <a href="#">Ern2</a>               | 0.871 | -1.616 | 0.14876   | 0.391099  |
| 17294 | 10489055 | <a href="#">NM_029983</a>          | <a href="#">77799</a>     | Src-like-adaptor 2                | <a href="#">Sla2</a>               | 0.871 | -1.994 | 0.0852206 | 0.280273  |
| 17295 | 10528929 | <a href="#">NM_178878</a>          | <a href="#">97212</a>     | hydroxyacyl-Coenzyme A dehydro    | <a href="#">Hadha</a>              | 0.871 | -2.395 | 0.0467819 | 0.192107  |
| 17296 | 10584634 | <a href="#">NM_198092</a>          | <a href="#">53376</a>     | ubiquitin specific peptidase 2    | <a href="#">Usp2</a>               | 0.871 | -1.95  | 0.0909364 | 0.291551  |
| 17297 | 10575725 | <a href="#">NM_029297</a>          | <a href="#">75465</a>     | dynein light chain roadblock-t    | <a href="#">Dynlrb2</a>            | 0.871 | -2.188 | 0.0637111 | 0.234381  |
| 17298 | 10459467 |                                    |                           |                                   |                                    | 0.871 | -2.35  | 0.0500263 | 0.201094  |
| 17299 | 10500630 | <a href="#">NM_001013026</a>       | <a href="#">74044</a>     | transcription termination fact    | <a href="#">Ttf2</a>               | 0.871 | -1.695 | 0.132578  | 0.366243  |
| 17300 | 10598571 | <a href="#">ENSMUST00000059967</a> | <a href="#">75775</a>     | RIKEN cDNA 4930402K13 gene        | <a href="#">4930402K13Rik</a>      | 0.871 | -1.733 | 0.125406  | 0.354707  |
| 17301 | 10595496 | <a href="#">NM_013669</a>          | <a href="#">20616</a>     | synaptosomal-associated protei    | <a href="#">Snap91</a>             | 0.871 | -1.666 | 0.138467  | 0.376413  |
| 17302 | 10603306 |                                    |                           |                                   |                                    | 0.871 | -1.27  | 0.243601  | 0.516619  |
| 17303 | 10440307 | <a href="#">NM_026879</a>          | <a href="#">68942</a>     | chromatin modifying protein 2B    | <a href="#">Chmp2b</a>             | 0.87  | -1.437 | 0.192651  | 0.452175  |
| 17304 | 10346874 |                                    |                           |                                   |                                    | 0.87  | -0.913 | 0.390763  | 0.659209  |
| 17305 | 10563666 |                                    |                           |                                   |                                    | 0.87  | -1.882 | 0.100704  | 0.310572  |
| 17306 | 10393970 | <a href="#">NM_007988</a>          | <a href="#">14104</a>     | fatty acid synthase               | <a href="#">Fasn</a>               | 0.87  | -2.722 | 0.0288372 | 0.139559  |
| 17307 | 10400479 | <a href="#">NM_008701</a>          | <a href="#">18094</a>     | NK2 transcription factor relat    | <a href="#">Nkx2-9</a>             | 0.87  | -1.277 | 0.241152  | 0.514009  |
| 17308 | 10502131 | <a href="#">XM_914534</a>          | <a href="#">242235</a>    | leucine-rich repeat, immunoglo    | <a href="#">Lrit3</a>              | 0.87  | -1.158 | 0.283813  | 0.559164  |
| 17309 | 10572928 | <a href="#">ENSMUST00000041083</a> | <a href="#">75141</a>     | RASD family, member 2             | <a href="#">Rasd2</a>              | 0.87  | -1.477 | 0.181829  | 0.438179  |
| 17310 | 10529895 | <a href="#">NM_024236</a>          | <a href="#">110391</a>    | quinoid dihydropteridine reduc    | <a href="#">Qdpr</a>               | 0.87  | -2.295 | 0.0543038 | 0.211923  |
| 17311 | 10512757 | <a href="#">NM_053149</a>          | <a href="#">93966</a>     | hemogen                           | <a href="#">Hemgn</a>              | 0.87  | -0.48  | 0.645542  | 0.840011  |
| 17312 | 10379889 | <a href="#">AK014613</a>           | <a href="#">66884</a>     | amyloid beta precursor protein    | <a href="#">Appbp2</a>             | 0.87  | -0.93  | 0.382667  | 0.652088  |
| 17313 | 10559359 | <a href="#">ENSMUST00000084390</a> | <a href="#">791284</a>    | predicted gene, ENSMUSG0000006    | <a href="#">ENSMUSG00000066092</a> | 0.87  | -1.235 | 0.255448  | 0.529807  |
| 17314 | 10594377 | <a href="#">BC116242</a>           | <a href="#">69478</a>     | RIKEN cDNA 2300009A05 gene        | <a href="#">2300009A05Rik</a>      | 0.87  | -2.17  | 0.0654555 | 0.238533  |
| 17315 | 10568060 | <a href="#">BC048622</a>           | <a href="#">78118</a>     | RIKEN cDNA 4930451I11 gene        | <a href="#">4930451I11Rik</a>      | 0.87  | -1.226 | 0.25856   | 0.532776  |
| 17316 | 10563220 | <a href="#">NM_029741</a>          | <a href="#">76787</a>     | protein tyrosine phosphatase,     | <a href="#">Ppfia3</a>             | 0.87  | -1.584 | 0.155953  | 0.401839  |
| 17317 | 10491098 | <a href="#">NM_177330</a>          | <a href="#">208188</a>    | growth hormone secretagogue re    | <a href="#">Ghsr</a>               | 0.87  | -1.528 | 0.16917   | 0.42056   |
| 17318 | 10422249 | <a href="#">NM_010024</a>          | <a href="#">13190</a>     | dopachrome tautomerase            | <a href="#">Dct</a>                | 0.87  | -1.907 | 0.0969    | 0.303175  |
| 17319 | 10461775 | <a href="#">ENSMUST00000081313</a> | <a href="#">383436</a>    | predicted gene, EG383436          | <a href="#">EG383436</a>           | 0.87  | -1.409 | 0.200456  | 0.46246   |
| 17320 | 10352864 |                                    |                           |                                   |                                    | 0.87  | -2.007 | 0.0835247 | 0.276766  |
| 17321 | 10485948 | <a href="#">NM_011824</a>          | <a href="#">23892</a>     | gremlin 1                         | <a href="#">Greml1</a>             | 0.87  | -1.136 | 0.292237  | 0.568399  |
| 17322 | 10421212 | <a href="#">XR_033481</a>          | <a href="#">382919</a>    | predicted gene, EG382919          | <a href="#">EG382919</a>           | 0.87  | -1.525 | 0.169732  | 0.421023  |
| 17323 | 10535747 | <a href="#">ENSMUST00000100438</a> | <a href="#">100038524</a> | predicted gene, ENSMUSG0000007    | <a href="#">ENSMUSG00000075546</a> | 0.87  | -1.263 | 0.245934  | 0.51897   |
| 17324 | 10561690 | <a href="#">BC022688</a>           | <a href="#">320225</a>    | RIKEN cDNA A230107C01 gene        | <a href="#">A230107C01Rik</a>      | 0.87  | -1.064 | 0.321746  | 0.598593  |
| 17325 | 10439130 | <a href="#">NM_009471</a>          | <a href="#">22247</a>     | uridine monophosphate syntheta    | <a href="#">Umps</a>               | 0.87  | -2.279 | 0.0556038 | 0.215288  |
| 17326 | 10601350 | <a href="#">NM_030614</a>          | <a href="#">80903</a>     | fibroblast growth factor 16       | <a href="#">Fgf16</a>              | 0.87  | -1.648 | 0.142183  | 0.382143  |
| 17327 | 10499438 | <a href="#">NM_144898</a>          | <a href="#">229524</a>    | misato homolog 1 (Drosophila)     | <a href="#">Msto1</a>              | 0.87  | -3.183 | 0.014815  | 0.0893521 |
| 17328 | 10606893 | <a href="#">NM_176971</a>          | <a href="#">319642</a>    | RAB9B, member RAS oncogene family | <a href="#">Rab9b</a>              | 0.87  | -1.413 | 0.199426  | 0.46104   |
| 17329 | 10307257 | <a href="#">NM_007701</a>          | <a href="#">12677</a>     | visual system homeobox 2          | <a href="#">Vsx2</a>               | 0.87  | -2.222 | 0.0606071 | 0.227054  |

|       |          |                                    |                           |                                   |                                    |       |        |            |           |
|-------|----------|------------------------------------|---------------------------|-----------------------------------|------------------------------------|-------|--------|------------|-----------|
| 17327 | 10571257 | <a href="#">NM_007101</a>          | <a href="#">12077</a>     | visual system homeobox 2          | <a href="#">Vsx2</a>               | 0.87  | -2.222 | 0.0000071  | 0.227054  |
| 17330 | 10567095 | <a href="#">NM_007587</a>          | <a href="#">12310</a>     | calcitonin/calcitonin-related     | <a href="#">Calca</a>              | 0.87  | -2.362 | 0.0491867  | 0.199006  |
| 17331 | 10490194 | <a href="#">ENSMUST00000099033</a> | <a href="#">100038374</a> | predicted gene,<br>ENSMUSG0000007 | <a href="#">ENSMUSG00000074555</a> | 0.87  | -0.987 | 0.355392   | 0.628032  |
| 17332 | 10442254 |                                    |                           |                                   |                                    | 0.87  | -2.028 | 0.0809591  | 0.271714  |
| 17333 | 10504551 | <a href="#">NM_027266</a>          | <a href="#">69934</a>     | RNA (guanine-9-) methyltransfe    | <a href="#">Re9mtd3</a>            | 0.87  | -2.718 | 0.0290215  | 0.14013   |
| 17334 | 10419966 | <a href="#">NM_001039198</a>       | <a href="#">239102</a>    | zinc finger homeobox 2            | <a href="#">Zfx2</a>               | 0.87  | -3.265 | 0.01321    | 0.0825632 |
| 17335 | 10443120 |                                    |                           |                                   |                                    | 0.87  | -1.21  | 0.264459   | 0.539533  |
| 17336 | 10598501 | <a href="#">NR_003632</a>          | <a href="#">627782</a>    | predicted gene, EG627782          | <a href="#">EG627782</a>           | 0.87  | -1.275 | 0.241785   | 0.514522  |
| 17337 | 10407929 | <a href="#">NM_175006</a>          | <a href="#">218030</a>    | POU domain, class 6, transcrip    | <a href="#">Pou6f2</a>             | 0.87  | -3.38  | 0.0112472  | 0.0734663 |
| 17338 | 10569311 | <a href="#">XR_034827</a>          | <a href="#">270015</a>    | similar to ribosomal protein L    | <a href="#">LOC270015</a>          | 0.87  | -1.418 | 0.198057   | 0.458849  |
| 17339 | 10440131 | <a href="#">BC119501</a>           | <a href="#">71223</a>     | G protein-coupled receptor 15     | <a href="#">Gpr15</a>              | 0.87  | -1.052 | 0.326704   | 0.602834  |
| 17340 | 10584591 |                                    |                           |                                   |                                    | 0.87  | -2.196 | 0.0630102  | 0.232692  |
| 17341 | 10534988 |                                    |                           |                                   |                                    | 0.87  | -0.787 | 0.456546   | 0.712611  |
| 17342 | 10475335 | <a href="#">NM_007952</a>          | <a href="#">14827</a>     | protein disulfide isomerase as    | <a href="#">Pdia3</a>              | 0.87  | -3.273 | 0.0130658  | 0.0818315 |
| 17343 | 10489912 | <a href="#">NM_145538</a>          | <a href="#">407243</a>    | transmembrane protein 189         | <a href="#">Tmem189</a>            | 0.87  | -1.173 | 0.278046   | 0.55314   |
| 17344 | 10540952 | <a href="#">NM_031177</a>          | <a href="#">81896</a>     | intraflagellar transport 122 h    | <a href="#">Ift122</a>             | 0.87  | -2.54  | 0.0377507  | 0.167689  |
| 17345 | 10546829 | <a href="#">NM_001081147</a>       | <a href="#">18430</a>     | oxytocin receptor                 | <a href="#">Oxtr</a>               | 0.87  | -1.072 | 0.318084   | 0.595218  |
| 17346 | 10521459 | <a href="#">NM_175249</a>          | <a href="#">76943</a>     | prosaposin-like 1                 | <a href="#">Psap1l</a>             | 0.87  | -0.909 | 0.392563   | 0.66054   |
| 17347 | 10488108 | <a href="#">NM_001081090</a>       | <a href="#">66580</a>     | ESF1, nucleolar pre-rRNA proce    | <a href="#">Esf1</a>               | 0.87  | -2.786 | 0.0262575  | 0.131343  |
| 17348 | 10430804 | <a href="#">BC056972</a>           | <a href="#">28075</a>     | DNA segment, Chr 15, Wayne<br>Sta | <a href="#">D15Wsu75e</a>          | 0.87  | -2.165 | 0.0660142  | 0.239751  |
| 17349 | 10352725 | <a href="#">NM_025864</a>          | <a href="#">66950</a>     | transmembrane protein 206         | <a href="#">Tmem206</a>            | 0.87  | -2.97  | 0.0201021  | 0.110172  |
| 17350 | 10514791 | <a href="#">NM_153565</a>          | <a href="#">100102</a>    | proprotein convertase subtilis    | <a href="#">Pcsk9</a>              | 0.87  | -1.5   | 0.175964   | 0.429653  |
| 17351 | 10453688 |                                    |                           |                                   |                                    | 0.87  | -0.833 | 0.431643   | 0.692201  |
| 17352 | 10597354 | <a href="#">NM_011052</a>          | <a href="#">18571</a>     | programmed cell death 6 intera    | <a href="#">Pcd6ip</a>             | 0.87  | -1.989 | 0.0857702  | 0.281088  |
| 17353 | 10580418 | <a href="#">NM_172912</a>          | <a href="#">244562</a>    | ATP-binding cassette, sub-fami    | <a href="#">Abcc12</a>             | 0.869 | -1.5   | 0.176147   | 0.429929  |
| 17354 | 10572180 | <a href="#">NM_133224</a>          | <a href="#">170759</a>    | ATPase type 13A1                  | <a href="#">Atp13a1</a>            | 0.869 | -3.058 | 0.0177204  | 0.100883  |
| 17355 | 10445360 | <a href="#">NM_178652</a>          | <a href="#">109115</a>    | suppressor of Ty 3 homolog (S.    | <a href="#">Supt3h</a>             | 0.869 | -3.582 | 0.00851197 | 0.0604965 |
| 17356 | 10350337 | <a href="#">ENSMUST00000054333</a> | <a href="#">320138</a>    | RIKEN cDNA A130050O07<br>gene     | <a href="#">A130050O07Rik</a>      | 0.869 | -1.579 | 0.157127   | 0.403583  |
| 17357 | 10466344 |                                    |                           |                                   |                                    | 0.869 | -1.261 | 0.246451   | 0.519536  |
| 17358 | 10409999 | <a href="#">NM_007994</a>          | <a href="#">14120</a>     | fructose bisphosphatase 2         | <a href="#">Fbp2</a>               | 0.869 | -1.486 | 0.179599   | 0.434993  |
| 17359 | 10426592 | <a href="#">NM_146457</a>          | <a href="#">258449</a>    | olfactory receptor 282            | <a href="#">Olf282</a>             | 0.869 | -1.532 | 0.168213   | 0.419669  |
| 17360 | 10465604 | <a href="#">NM_016737</a>          | <a href="#">20867</a>     | stress-induced phosphoprotein     | <a href="#">Stip1</a>              | 0.869 | -2.594 | 0.0348149  | 0.158375  |
| 17361 | 10595831 | <a href="#">NM_175537</a>          | <a href="#">245007</a>    | zinc finger and BTB domain con    | <a href="#">Zbtb38</a>             | 0.869 | -2.967 | 0.0201755  | 0.110487  |
| 17362 | 10569014 | <a href="#">NM_030694</a>          | <a href="#">80876</a>     | interferon induced transmembra    | <a href="#">Ifitm2</a>             | 0.869 | -2.035 | 0.0801373  | 0.270028  |
| 17363 | 10423383 |                                    |                           |                                   |                                    | 0.869 | -2.009 | 0.0833135  | 0.276517  |
| 17364 | 10442027 | <a href="#">ENSMUST00000067349</a> | <a href="#">100036531</a> | predicted gene,<br>ENSMUSG0000005 | <a href="#">ENSMUSG00000054339</a> | 0.869 | -0.816 | 0.44035    | 0.699292  |
| 17365 | 10596900 | <a href="#">NM_133986</a>          | <a href="#">102791</a>    | T-cell leukemia translocation     | <a href="#">Tcta</a>               | 0.869 | -2.781 | 0.0264676  | 0.132113  |
| 17366 | 10553399 |                                    |                           |                                   |                                    | 0.869 | -1.554 | 0.162772   | 0.411428  |
| 17367 | 10579543 | <a href="#">NM_145598</a>          | <a href="#">234404</a>    | nucleoredoxin-like 1              | <a href="#">Nxn1l</a>              | 0.869 | -1.926 | 0.0942997  | 0.298038  |
| 17368 | 10407034 | <a href="#">NM_008308</a>          | <a href="#">15550</a>     | 5-hydroxytryptamine (serotonin    | <a href="#">Htr1a</a>              | 0.869 | -1.389 | 0.206226   | 0.470383  |
| 17369 | 10495867 | <a href="#">ENSMUST00000109540</a> | <a href="#">668809</a>    | predicted gene, EG668809          | <a href="#">EG668809</a>           | 0.869 | -1.716 | 0.128534   | 0.359524  |
| 17370 | 10474619 | <a href="#">NM_010230</a>          | <a href="#">14260</a>     | formin 1                          | <a href="#">Fmn1</a>               | 0.869 | -1.128 | 0.295571   | 0.57199   |
| 17371 | 10585068 | <a href="#">BC094249</a>           | <a href="#">244853</a>    | RIKEN cDNA D930028F11<br>gene     | <a href="#">D930028F11Rik</a>      | 0.869 | -1.536 | 0.167222   | 0.418184  |
| 17372 | 10387922 | <a href="#">NM_024211</a>          | <a href="#">67863</a>     | solute carrier family 25 (mito    | <a href="#">Slc25a11</a>           | 0.869 | -2.476 | 0.0414653  | 0.177622  |
| 17373 | 10448967 | <a href="#">NM_011447</a>          | <a href="#">20681</a>     | SRY-box containing gene 8         | <a href="#">Sox8</a>               | 0.869 | -1.756 | 0.12128    | 0.347845  |
| 17374 | 10602719 | <a href="#">NM_173367</a>          | <a href="#">69361</a>     | cysteine-rich perinuclear thec    | <a href="#">Cyp3</a>               | 0.869 | -1.685 | 0.134634   | 0.369832  |
| 17375 | 10542894 |                                    |                           |                                   |                                    | 0.869 | -2.355 | 0.0496818  | 0.200281  |
| 17376 | 10456545 | <a href="#">NM_201362</a>          | <a href="#">381175</a>    | coiled-coil domain containing     | <a href="#">Ccdc68</a>             | 0.869 | -1.684 | 0.134874   | 0.370228  |
| 17377 | 10441330 | <a href="#">NM_175428</a>          | <a href="#">114565</a>    | zinc finger protein 295           | <a href="#">Zfp295</a>             | 0.869 | -2.269 | 0.0565068  | 0.217312  |
| 17378 | 10352348 | <a href="#">NM_030131</a>          | <a href="#">98417</a>     | cornichon homolog 4 (Drosophil    | <a href="#">Cnih4</a>              | 0.869 | -3.407 | 0.0108244  | 0.0716116 |
| 17379 | 10499643 | <a href="#">NM_009602</a>          | <a href="#">11444</a>     | cholinergic receptor, nicotini    | <a href="#">Chrb2</a>              | 0.869 | -1.483 | 0.180445   | 0.436137  |
| 17380 | 10583472 | <a href="#">NM_023371</a>          | <a href="#">23988</a>     | protein (peptidyl-prolyl cis/t    | <a href="#">Pin1</a>               | 0.869 | -1.912 | 0.0962029  | 0.301887  |

TBC1 domain family member

|       |          |                                    |                           |                                 |                                    |       |        |           |           |
|-------|----------|------------------------------------|---------------------------|---------------------------------|------------------------------------|-------|--------|-----------|-----------|
| 17381 | 10521927 | <a href="#">NM_144517</a>          | <a href="#">67249</a>     | TBC1 domain family, member 19   | <a href="#">Tbc1d19</a>            | 0.869 | -2.73  | 0.0284968 | 0.138514  |
| 17382 | 10354019 | <a href="#">BC072639</a>           | <a href="#">72097</a>     | RIKEN cDNA 2010300C02 gene      | <a href="#">2010300C02Rik</a>      | 0.869 | -2.26  | 0.0572718 | 0.218979  |
| 17383 | 10357736 | <a href="#">NM_182716</a>          | <a href="#">269116</a>    | neurofascin                     | <a href="#">Nfasc</a>              | 0.869 | -2.253 | 0.0578652 | 0.220644  |
| 17384 | 10530029 | <a href="#">NM_144945</a>          | <a href="#">246316</a>    | leucine-rich repeat LGI family  | <a href="#">Lgi2</a>               | 0.869 | -1.663 | 0.139032  | 0.377126  |
| 17385 | 10552557 | <a href="#">NM_008457</a>          | <a href="#">16624</a>     | kallikrein 1-related peptidase  | <a href="#">Klik1b8</a>            | 0.869 | -2.113 | 0.0712748 | 0.250796  |
| 17386 | 10604687 | <a href="#">NM_146234</a>          | <a href="#">236792</a>    | transmembrane protein 32        | <a href="#">Tmem32</a>             | 0.869 | -2.552 | 0.0370795 | 0.165263  |
| 17387 | 10472361 |                                    |                           |                                 |                                    | 0.869 | -1.758 | 0.120919  | 0.347273  |
| 17388 | 10590586 | <a href="#">NM_013860</a>          | <a href="#">29806</a>     | LIM domains containing 1        | <a href="#">Limd1</a>              | 0.869 | -1.84  | 0.107104  | 0.322599  |
| 17389 | 10541049 | <a href="#">NM_027920</a>          | <a href="#">71779</a>     | membrane-associated ring finger | <a href="#">March8</a>             | 0.868 | -1.63  | 0.145757  | 0.38722   |
| 17390 | 10384474 | <a href="#">NM_025443</a>          | <a href="#">66249</a>     | partner of NOB1 homolog (S. ce  | <a href="#">Pno1</a>               | 0.868 | -2.188 | 0.0637763 | 0.234479  |
| 17391 | 10563728 | <a href="#">XM_915262</a>          | <a href="#">435978</a>    | predicted gene, EG435978        | <a href="#">EG435978</a>           | 0.868 | -0.766 | 0.467729  | 0.720349  |
| 17392 | 10479099 | <a href="#">NM_213733</a>          | <a href="#">228961</a>    | aminopeptidase-like 1           | <a href="#">Npepl1</a>             | 0.868 | -2.304 | 0.0536115 | 0.210036  |
| 17393 | 10597775 | <a href="#">BC109365</a>           | <a href="#">209012</a>    | unc-51-like kinase 4 (C. elega  | <a href="#">Ulk4</a>               | 0.868 | -2.59  | 0.0350124 | 0.159     |
| 17394 | 10497968 | <a href="#">ENSMUST00000105030</a> | <a href="#">100038440</a> | predicted gene, ENSMUSG0000007  | <a href="#">ENSMUSG00000074617</a> | 0.868 | -1.756 | 0.121295  | 0.347845  |
| 17395 | 10380135 |                                    |                           |                                 |                                    | 0.868 | -0.548 | 0.599925  | 0.812084  |
| 17396 | 10409338 | <a href="#">BC012213</a>           | <a href="#">28126</a>     | DNA segment, Chr 13, Wayne Sta  | <a href="#">D13Wsu177e</a>         | 0.868 | -2.605 | 0.0342569 | 0.156747  |
| 17397 | 10437575 | <a href="#">BC027071</a>           | <a href="#">74720</a>     | RIKEN cDNA 4930511J11 gene      | <a href="#">4930511J11Rik</a>      | 0.868 | -0.941 | 0.376998  | 0.647069  |
| 17398 | 10540075 | <a href="#">NM_144919</a>          | <a href="#">232232</a>    | histone deacetylase 11          | <a href="#">Hdac11</a>             | 0.868 | -0.872 | 0.411391  | 0.675346  |
| 17399 | 10558088 |                                    |                           |                                 |                                    | 0.868 | -0.839 | 0.428351  | 0.689379  |
| 17400 | 10563838 | <a href="#">NM_023647</a>          | <a href="#">93790</a>     | non imprinted in Prader-Willi/  | <a href="#">Nipa2</a>              | 0.868 | -1.897 | 0.0984737 | 0.30638   |
| 17401 | 10383351 | <a href="#">ENSMUST00000069526</a> | <a href="#">791271</a>    | predicted gene, ENSMUSG0000005  | <a href="#">ENSMUSG00000055790</a> | 0.868 | -1.203 | 0.267007  | 0.541627  |
| 17402 | 10487139 | <a href="#">NM_199022</a>          | <a href="#">271849</a>    | SHC (Src homology 2 domain con  | <a href="#">Shc4</a>               | 0.868 | -2.458 | 0.0426053 | 0.180844  |
| 17403 | 10536442 |                                    |                           |                                 |                                    | 0.868 | -1.941 | 0.0922058 | 0.294263  |
| 17404 | 10417538 | <a href="#">NM_024221</a>          | <a href="#">68263</a>     | pyruvate dehydrogenase (lipoam  | <a href="#">Pdhb</a>               | 0.868 | -2.471 | 0.0418027 | 0.178453  |
| 17405 | 10531407 | <a href="#">NM_008599</a>          | <a href="#">17329</a>     | chemokine (C-X-C motif) ligand  | <a href="#">Cxcl9</a>              | 0.868 | -1.638 | 0.144143  | 0.385253  |
| 17406 | 10353050 | <a href="#">NM_013715</a>          | <a href="#">26754</a>     | COP9 (constitutive photomorpho  | <a href="#">Cops5</a>              | 0.868 | -2.926 | 0.0214362 | 0.114576  |
| 17407 | 10396125 | <a href="#">NM_178628</a>          | <a href="#">73991</a>     | spastic paraplegia 3A homolog   | <a href="#">Spg3a</a>              | 0.868 | -2.495 | 0.0403078 | 0.174753  |
| 17408 | 10464672 | <a href="#">NM_198113</a>          | <a href="#">245857</a>    | slingshot homolog 3 (Drosophil  | <a href="#">Ssh3</a>               | 0.868 | -2.194 | 0.0631456 | 0.232848  |
| 17409 | 10452043 | <a href="#">NM_029799</a>          | <a href="#">76920</a>     | arrestin domain containing 5    | <a href="#">Arrdc5</a>             | 0.868 | -1.941 | 0.0922353 | 0.294284  |
| 17410 | 10524723 | <a href="#">NM_172719</a>          | <a href="#">231659</a>    | GCN1 general control of amino-  | <a href="#">Gen111</a>             | 0.868 | -3.452 | 0.0101815 | 0.0688008 |
| 17411 | 10373924 | <a href="#">NM_029291</a>          | <a href="#">75452</a>     | activating signal cointegrator  | <a href="#">Ascc2</a>              | 0.868 | -2.546 | 0.0373655 | 0.166292  |
| 17412 | 10406865 | <a href="#">NM_173757</a>          | <a href="#">218506</a>    | mitochondrial ribosomal protei  | <a href="#">Mrps27</a>             | 0.868 | -1.905 | 0.0973022 | 0.303848  |
| 17413 | 10578025 |                                    |                           |                                 |                                    | 0.868 | -2.362 | 0.0491248 | 0.198945  |
| 17414 | 10489471 | <a href="#">NM_013592</a>          | <a href="#">17183</a>     | matrilin 4                      | <a href="#">Matn4</a>              | 0.868 | -1.642 | 0.143308  | 0.384029  |
| 17415 | 10553336 | <a href="#">NM_028031</a>          | <a href="#">243983</a>    | zinc finger, DHHC domain conta  | <a href="#">Zdhhc13</a>            | 0.868 | -2.752 | 0.0276177 | 0.135992  |
| 17416 | 10459802 | <a href="#">XR_034415</a>          | <a href="#">668184</a>    | similar to ribosomal protein L  | <a href="#">LOC668184</a>          | 0.868 | -2.351 | 0.0500016 | 0.201094  |
| 17417 | 10565577 | <a href="#">ENSMUST00000098303</a> | <a href="#">100036533</a> | predicted gene, ENSMUSG0000005  | <a href="#">ENSMUSG00000054061</a> | 0.868 | -1.589 | 0.154832  | 0.400004  |
| 17418 | 10432150 | <a href="#">NM_001011778</a>       | <a href="#">257943</a>    | olfactory receptor 285          | <a href="#">Olf285</a>             | 0.868 | -0.893 | 0.400642  | 0.666392  |
| 17419 | 10398342 | <a href="#">NR_002848</a>          | <a href="#">76880</a>     | RIKEN cDNA 6430411K18 gene      | <a href="#">6430411K18Rik</a>      | 0.868 | -1.731 | 0.125785  | 0.355049  |
| 17420 | 10565525 |                                    |                           |                                 |                                    | 0.868 | -1.31  | 0.230217  | 0.501153  |
| 17421 | 10566564 | <a href="#">NM_025301</a>          | <a href="#">27397</a>     | mitochondrial ribosomal protei  | <a href="#">Mrpl17</a>             | 0.868 | -2.419 | 0.0451655 | 0.187967  |
| 17422 | 10551966 | <a href="#">NM_001012401</a>       | <a href="#">243912</a>    | heat shock protein, alpha-crys  | <a href="#">Hspb6</a>              | 0.868 | -2.35  | 0.0500175 | 0.201094  |
| 17423 | 10556125 | <a href="#">XR_033898</a>          | <a href="#">626732</a>    | similar to peptidylprolyl isom  | <a href="#">LOC626732</a>          | 0.868 | -1.809 | 0.112088  | 0.33142   |
| 17424 | 10415787 | <a href="#">NM_206974</a>          | <a href="#">328424</a>    | potassium channel regulator     | <a href="#">Kcnrg</a>              | 0.868 | -2.237 | 0.059205  | 0.224025  |
| 17425 | 10410889 |                                    |                           |                                 |                                    | 0.868 | -1.887 | 0.0998809 | 0.308935  |
| 17426 | 10345529 | <a href="#">ENSMUST00000067178</a> | <a href="#">215413</a>    | RIKEN cDNA A230074B11 gene      | <a href="#">A230074B11Rik</a>      | 0.868 | -1.797 | 0.114097  | 0.335204  |
| 17427 | 10428912 | <a href="#">XR_035243</a>          | <a href="#">399603</a>    | RIKEN cDNA D330050I23 gene      | <a href="#">D330050I23Rik</a>      | 0.868 | -1.935 | 0.0930572 | 0.295658  |
| 17428 | 10576940 | <a href="#">AK149049</a>           | <a href="#">270028</a>    | expressed sequence AW121567     | <a href="#">AW121567</a>           | 0.868 | -1.688 | 0.134055  | 0.36907   |
| 17429 | 10408364 | <a href="#">XR_033316</a>          | <a href="#">214973</a>    | similar to peptidylprolyl isom  | <a href="#">LOC214973</a>          | 0.868 | -1.79  | 0.115333  | 0.337519  |
| 17430 | 10480345 | <a href="#">XR_032045</a>          | <a href="#">625815</a>    | similar to ATP synthase, H+ tr  | <a href="#">LOC625815</a>          | 0.868 | -2.618 | 0.0335944 | 0.154552  |
| 17431 | 10403004 | <a href="#">NM_026591</a>          | <a href="#">67707</a>     | mitochondrial ribosomal protei  | <a href="#">Mmr124</a>             | 0.868 | -2.672 | 0.031035  | 0.146000  |

|       |          |                                    |                           |                                   |                                    |       |        |            |           |
|-------|----------|------------------------------------|---------------------------|-----------------------------------|------------------------------------|-------|--------|------------|-----------|
| 17431 | 10475074 | <a href="#">NM_020521</a>          | <a href="#">97797</a>     | mitochondrial ribosomal protein   | <a href="#">mip127</a>             | 0.868 | -2.072 | 0.031033   | 0.140222  |
| 17432 | 10600584 |                                    |                           |                                   |                                    | 0.868 | -1.542 | 0.165679   | 0.416146  |
| 17433 | 10476104 |                                    |                           |                                   |                                    | 0.868 | -1.441 | 0.191553   | 0.450872  |
| 17434 | 10573457 | <a href="#">NM_010635</a>          | <a href="#">16596</a>     | Kruppel-like factor 1 (erythro    | <a href="#">Klf1</a>               | 0.868 | -0.74  | 0.482598   | 0.731369  |
| 17435 | 10579052 | <a href="#">ENSMUST00000095282</a> | <a href="#">378466</a>    | predicted gene,<br>ENSMUSG0000005 | <a href="#">ENSMUSG00000057924</a> | 0.868 | -1.52  | 0.171041   | 0.422803  |
| 17436 | 10355528 |                                    |                           |                                   |                                    | 0.868 | -1.139 | 0.291174   | 0.56727   |
| 17437 | 10437737 | <a href="#">NM_025546</a>          | <a href="#">66409</a>     | ribosomal L1 domain containing    | <a href="#">Rsl1d1</a>             | 0.867 | -2.482 | 0.0411107  | 0.176721  |
| 17438 | 10364315 |                                    |                           |                                   |                                    | 0.867 | -1.764 | 0.119808   | 0.346027  |
| 17439 | 10386473 | <a href="#">NM_011480</a>          | <a href="#">20787</a>     | sterol regulatory element bind    | <a href="#">Srebf1</a>             | 0.867 | -2.774 | 0.0267221  | 0.132919  |
| 17440 | 10591537 | <a href="#">NM_010744</a>          | <a href="#">17083</a>     | transmembrane emp24 domain con    | <a href="#">Tmed1</a>              | 0.867 | -2.457 | 0.0426904  | 0.181072  |
| 17441 | 10518763 | <a href="#">NM_173774</a>          | <a href="#">242773</a>    | solute carrier family 45, memb    | <a href="#">Slc45a1</a>            | 0.867 | -1.163 | 0.281866   | 0.557053  |
| 17442 | 10569654 | <a href="#">AK007416</a>           | <a href="#">381935</a>    | RIKEN cDNA 1810010D01 gene        | <a href="#">1810010D01Rik</a>      | 0.867 | -1.115 | 0.300819   | 0.57699   |
| 17443 | 10483559 | <a href="#">ENSMUST00000115986</a> | <a href="#">100039766</a> | similar to High mobility group    | <a href="#">LOC100039766</a>       | 0.867 | -1.018 | 0.341793   | 0.616313  |
| 17444 | 10493894 |                                    |                           |                                   |                                    | 0.867 | -0.851 | 0.422092   | 0.684326  |
| 17445 | 10546710 | <a href="#">NM_181590</a>          | <a href="#">72171</a>     | SHQ1 homolog (S. cerevisiae)      | <a href="#">Shq1</a>               | 0.867 | -2.935 | 0.0211416  | 0.113886  |
| 17446 | 10442829 | <a href="#">NM_022422</a>          | <a href="#">64337</a>     | guanine nucleotide binding pro    | <a href="#">Gng13</a>              | 0.867 | -2.321 | 0.0522417  | 0.206719  |
| 17447 | 10373101 | <a href="#">NM_054097</a>          | <a href="#">117150</a>    | phosphatidylinositol-5-phospha    | <a href="#">Pip4k2c</a>            | 0.867 | -2.039 | 0.0796989  | 0.269022  |
| 17448 | 10574511 | <a href="#">BC015286</a>           | <a href="#">234669</a>    | cDNA sequence BC015286            | <a href="#">BC015286</a>           | 0.867 | -2.093 | 0.0734709  | 0.255968  |
| 17449 | 10541182 | <a href="#">NM_133940</a>          | <a href="#">101358</a>    | F-box and leucine-rich repeat     | <a href="#">Fbx14</a>              | 0.867 | -2.837 | 0.0243635  | 0.125168  |
| 17450 | 10449977 | <a href="#">NM_001009544</a>       | <a href="#">74042</a>     | RIKEN cDNA 4921501E09 gene        | <a href="#">4921501E09Rik</a>      | 0.867 | -1.707 | 0.130239   | 0.362012  |
| 17451 | 10550509 | <a href="#">NM_009402</a>          | <a href="#">21946</a>     | peptidoglycan recognition prot    | <a href="#">Pglyrp1</a>            | 0.867 | -2.809 | 0.0254056  | 0.128819  |
| 17452 | 10429528 | <a href="#">NM_029627</a>          | <a href="#">76486</a>     | lymphocyte antigen 6 complex,     | <a href="#">Ly6k</a>               | 0.867 | -1.58  | 0.156914   | 0.403374  |
| 17453 | 10471953 | <a href="#">NM_007396</a>          | <a href="#">11480</a>     | activin receptor IIA              | <a href="#">Acvr2a</a>             | 0.867 | -3.812 | 0.00625328 | 0.0483612 |
| 17454 | 10353115 |                                    |                           |                                   |                                    | 0.867 | -2.282 | 0.0553722  | 0.214666  |
| 17455 | 10559270 | <a href="#">NM_020285</a>          | <a href="#">56844</a>     | tumor-suppressing subchromosom    | <a href="#">Tssc4</a>              | 0.867 | -2.201 | 0.0625091  | 0.231461  |
| 17456 | 10384883 | <a href="#">NM_176829</a>          | <a href="#">216622</a>    | RIKEN cDNA 4931440F15 gene        | <a href="#">4931440F15Rik</a>      | 0.867 | -1.766 | 0.119462   | 0.345748  |
| 17457 | 10484807 | <a href="#">NM_146789</a>          | <a href="#">258785</a>    | olfactory receptor 1230           | <a href="#">Olfr1230</a>           | 0.867 | -1.763 | 0.120072   | 0.346527  |
| 17458 | 10392098 | <a href="#">NM_025310</a>          | <a href="#">56095</a>     | FtsJ homolog 3 (E. coli)          | <a href="#">Ftsj3</a>              | 0.867 | -2.584 | 0.0353281  | 0.160053  |
| 17459 | 10563828 | <a href="#">NM_024284</a>          | <a href="#">14651</a>     | hydroxyacyl glutathione hydrol    | <a href="#">Hagh</a>               | 0.867 | -1.379 | 0.0370661  | 0.160482  |
| 17460 | 10442616 | <a href="#">NM_024284</a>          | <a href="#">14651</a>     | hydroxyacyl glutathione hydrol    | <a href="#">Hagh</a>               | 0.867 | -2.23  | 0.0599066  | 0.225586  |
| 17461 | 10375527 | <a href="#">NM_146276</a>          | <a href="#">258273</a>    | olfactory receptor 1394           | <a href="#">Olfr1394</a>           | 0.867 | -1.238 | 0.254448   | 0.5287    |
| 17462 | 10422272 | <a href="#">NM_177753</a>          | <a href="#">223227</a>    | SRY-box containing gene 21        | <a href="#">Sox21</a>              | 0.867 | -2.403 | 0.0462394  | 0.190954  |
| 17463 | 10588083 | <a href="#">NM_001122851</a>       | <a href="#">23873</a>     | Fas apoptotic inhibitory molec    | <a href="#">Faim</a>               | 0.867 | -2.359 | 0.0494124  | 0.19969   |
| 17464 | 10537426 | <a href="#">ENSMUST00000101511</a> | <a href="#">75379</a>     | RIKEN cDNA 4930599N23 gene        | <a href="#">4930599N23Rik</a>      | 0.867 | -2.289 | 0.0548085  | 0.21346   |
| 17465 | 10532390 | <a href="#">NM_153570</a>          | <a href="#">100608</a>    | nucleolar complex associated 4    | <a href="#">Noc4l</a>              | 0.867 | -3.139 | 0.0157705  | 0.0934297 |
| 17466 | 10349383 | <a href="#">NM_028787</a>          | <a href="#">74150</a>     | solute carrier family 35, memb    | <a href="#">Slc35f5</a>            | 0.867 | -1.754 | 0.121667   | 0.348297  |
| 17467 | 10349239 | <a href="#">NM_026472</a>          | <a href="#">67949</a>     | Mki67 (FHA domain) interacting    | <a href="#">Mki67ip</a>            | 0.867 | -2.142 | 0.0682471  | 0.244165  |
| 17468 | 10472925 | <a href="#">ENSMUST00000077161</a> | <a href="#">67686</a>     | RIKEN cDNA 1700011J10 gene        | <a href="#">1700011J10Rik</a>      | 0.867 | -1.918 | 0.095326   | 0.300062  |
| 17469 | 10379836 |                                    |                           |                                   |                                    | 0.867 | -1.059 | 0.32382    | 0.600286  |
| 17470 | 10573637 | <a href="#">NM_199446</a>          | <a href="#">102093</a>    | phosphorylase kinase beta         | <a href="#">Phkb</a>               | 0.867 | -1.986 | 0.0862544  | 0.282185  |
| 17471 | 10542764 | <a href="#">NM_172309</a>          | <a href="#">272322</a>    | aryl hydrocarbon receptor nucl    | <a href="#">Arnt2</a>              | 0.867 | -2.19  | 0.0635778  | 0.233993  |
| 17472 | 10428744 | <a href="#">BC050895</a>           | <a href="#">75758</a>     | RIKEN cDNA 9130401M01 gene        | <a href="#">9130401M01Rik</a>      | 0.867 | -1.934 | 0.0930989  | 0.295671  |
| 17473 | 10433639 | <a href="#">NM_153588</a>          | <a href="#">239719</a>    | MKL/myocardin-like 2              | <a href="#">Mkl2</a>               | 0.866 | -3.153 | 0.0154643  | 0.09237   |
| 17474 | 10416725 | <a href="#">ENSMUST00000022596</a> | <a href="#">219249</a>    | tudor domain containing 3         | <a href="#">Tdrd3</a>              | 0.866 | -0.501 | 0.631083   | 0.832075  |
| 17475 | 10482119 |                                    |                           |                                   |                                    | 0.866 | -1.333 | 0.223014   | 0.492935  |
| 17476 | 10488944 | <a href="#">NM_018888</a>          | <a href="#">56046</a>     | ubiquinol-cytochrome c reducta    | <a href="#">Uqcq</a>               | 0.866 | -2.441 | 0.0436798  | 0.184014  |
| 17477 | 10559446 | <a href="#">NM_011095</a>          | <a href="#">18733</a>     | leukocyte immunoglobulin-like     | <a href="#">Lilrb3</a>             | 0.866 | -0.991 | 0.353745   | 0.6265    |
| 17478 | 10561474 | <a href="#">NM_001024673</a>       | <a href="#">330496</a>    | interleukin 28A                   | <a href="#">Il28a</a>              | 0.866 | -1.27  | 0.243449   | 0.516453  |
| 17479 | 10495094 | <a href="#">BC052371</a>           | <a href="#">109050</a>    | RIKEN cDNA 6530418L21 gene        | <a href="#">6530418L21Rik</a>      | 0.866 | -1.347 | 0.218754   | 0.486928  |
| 17480 | 10424062 | <a href="#">XR_035197</a>          | <a href="#">239410</a>    | RIKEN cDNA A930017M01 gene        | <a href="#">A930017M01Rik</a>      | 0.866 | -1.649 | 0.141934   | 0.381716  |
| 17481 | 10568247 | <a href="#">NM_026999</a>          | <a href="#">69234</a>     | zinc finger protein 688           | <a href="#">Zfp688</a>             | 0.866 | -2.332 | 0.0514048  | 0.204767  |
| 17482 | 10422537 | <a href="#">NM_177393</a>          | <a href="#">338370</a>    | sodium leak channel, non-selec    | <a href="#">Nalcn</a>              | 0.866 | -1.343 | 0.220001   | 0.48888   |

|       |          |                                    |                           |                                |                                    |       |        |            |           |
|-------|----------|------------------------------------|---------------------------|--------------------------------|------------------------------------|-------|--------|------------|-----------|
| 17483 | 10460356 | <a href="#">NM_206973</a>          | <a href="#">269053</a>    | G protein-coupled receptor 152 | <a href="#">Gpr152</a>             | 0.866 | -1.839 | 0.107264   | 0.322736  |
| 17484 | 10352454 |                                    |                           |                                |                                    | 0.866 | -1.7   | 0.131759   | 0.364648  |
| 17485 | 10350159 | <a href="#">NM_133664</a>          | <a href="#">16763</a>     | ladinin                        | <a href="#">Lad1</a>               | 0.866 | -2.599 | 0.0345892  | 0.157792  |
| 17486 | 10594798 |                                    |                           |                                |                                    | 0.866 | -0.397 | 0.702871   | 0.869709  |
| 17487 | 10381561 | <a href="#">NM_148953</a>          | <a href="#">217217</a>    | ankyrin repeat and SOCS box-co | <a href="#">Asb16</a>              | 0.866 | -1.843 | 0.106601   | 0.322042  |
| 17488 | 10474793 | <a href="#">NM_001033254</a>       | <a href="#">214230</a>    | p21 (CDKN1A)-activated kinase  | <a href="#">Pak6</a>               | 0.866 | -1.83  | 0.108745   | 0.325496  |
| 17489 | 10444674 | <a href="#">NM_023463</a>          | <a href="#">68468</a>     | lymphocyte antigen 6 complex,  | <a href="#">Ly6g6c</a>             | 0.866 | -1.224 | 0.259489   | 0.533772  |
| 17490 | 10413222 | <a href="#">NM_134084</a>          | <a href="#">105675</a>    | peptidylprolyl isomerase F (cy | <a href="#">Ppif</a>               | 0.866 | -1.819 | 0.110431   | 0.328752  |
| 17491 | 10384940 | <a href="#">NM_025745</a>          | <a href="#">66753</a>     | RIKEN cDNA 4933407N01 gene     | <a href="#">4933407N01Rik</a>      | 0.866 | -2.087 | 0.074139   | 0.257405  |
| 17492 | 10515326 | <a href="#">NM_177670</a>          | <a href="#">230657</a>    | transmembrane protein 69       | <a href="#">Tmem69</a>             | 0.866 | -1.703 | 0.13117    | 0.363684  |
| 17493 | 10456248 | <a href="#">NM_194268</a>          | <a href="#">225631</a>    | one cut domain, family member  | <a href="#">Onecut2</a>            | 0.866 | -3.304 | 0.0125086  | 0.0791151 |
| 17494 | 10361323 | <a href="#">NM_172546</a>          | <a href="#">215748</a>    | Cnksr family member 3          | <a href="#">Cnksr3</a>             | 0.866 | -3.095 | 0.0167948  | 0.0975911 |
| 17495 | 10460157 | <a href="#">NM_013495</a>          | <a href="#">12894</a>     | carnitine palmitoyltransferase | <a href="#">Cpt1a</a>              | 0.866 | -1.927 | 0.094171   | 0.297861  |
| 17496 | 10454851 | <a href="#">NM_133687</a>          | <a href="#">67393</a>     | CXXC finger 5                  | <a href="#">Cxxc5</a>              | 0.866 | -2.099 | 0.0728658  | 0.254427  |
| 17497 | 10522160 | <a href="#">NM_001024917</a>       | <a href="#">333789</a>    | NEDD4 binding protein 2        | <a href="#">N4bp2</a>              | 0.866 | -3.416 | 0.0107013  | 0.0711644 |
| 17498 | 10470182 | <a href="#">NM_023326</a>          | <a href="#">107771</a>    | brain expressed myelocytomas   | <a href="#">Bmyc</a>               | 0.866 | -3.111 | 0.0164234  | 0.0962129 |
| 17499 | 10366846 | <a href="#">AK014574</a>           | <a href="#">216440</a>    | amplified in osteosarcoma      | <a href="#">Os9</a>                | 0.866 | -2.767 | 0.0270038  | 0.133769  |
| 17500 | 10599200 | <a href="#">NM_016783</a>          | <a href="#">53328</a>     | progesterone receptor membrane | <a href="#">Pgrmc1</a>             | 0.866 | -2.995 | 0.0193798  | 0.107409  |
| 17501 | 10394831 | <a href="#">ENSMUST00000101569</a> | <a href="#">544848</a>    | predicted gene, EG544848       | <a href="#">EG544848</a>           | 0.866 | -1.307 | 0.231369   | 0.502215  |
| 17502 | 10578322 |                                    |                           |                                |                                    | 0.866 | -2.479 | 0.0413227  | 0.177398  |
| 17503 | 10471782 | <a href="#">NM_146374</a>          | <a href="#">258371</a>    | olfactory receptor 368         | <a href="#">Olfr368</a>            | 0.866 | -2.641 | 0.0325115  | 0.151516  |
| 17504 | 10476301 | <a href="#">NM_145533</a>          | <a href="#">228608</a>    | spermine oxidase               | <a href="#">Smox</a>               | 0.866 | -2.2   | 0.0626098  | 0.231629  |
| 17505 | 10355670 | <a href="#">NM_001039495</a>       | <a href="#">241116</a>    | coiled-coil domain containing  | <a href="#">Ccdc108</a>            | 0.866 | -2.187 | 0.0638158  | 0.234583  |
| 17506 | 10486290 |                                    |                           |                                |                                    | 0.866 | -2.415 | 0.0454413  | 0.18869   |
| 17507 | 10500614 | <a href="#">NM_010763</a>          | <a href="#">17156</a>     | mannosidase, alpha, class 1A,  | <a href="#">Man1a2</a>             | 0.866 | -2.662 | 0.031487   | 0.148343  |
| 17508 | 10382339 | <a href="#">ENSMUST00000105048</a> | <a href="#">791285</a>    | predicted gene, ENSMUSG0000005 | <a href="#">ENSMUSG00000053270</a> | 0.865 | -0.89  | 0.40232    | 0.667397  |
| 17509 | 10464642 | <a href="#">BC023699</a>           | <a href="#">107239</a>    | expressed sequence AI790298    | <a href="#">AI790298</a>           | 0.865 | -1.412 | 0.19975    | 0.461486  |
| 17510 | 10512111 | <a href="#">NM_021535</a>          | <a href="#">74255</a>     | smu-1 suppressor of mec-8 and  | <a href="#">Smu1</a>               | 0.865 | -2.649 | 0.0321213  | 0.150359  |
| 17511 | 10517425 | <a href="#">NM_011942</a>          | <a href="#">26394</a>     | lysophospholipase 2            | <a href="#">Lypla2</a>             | 0.865 | -3.643 | 0.00783857 | 0.0571538 |
| 17512 | 10585328 | <a href="#">ENSMUST00000034550</a> | <a href="#">74695</a>     | RIKEN cDNA 4930510E17 gene     | <a href="#">4930510E17Rik</a>      | 0.865 | -1.731 | 0.125788   | 0.355049  |
| 17513 | 10599118 |                                    |                           |                                |                                    | 0.865 | -1.508 | 0.174151   | 0.427126  |
| 17514 | 10499932 | <a href="#">NM_026335</a>          | <a href="#">67718</a>     | late cornified envelope 1H     | <a href="#">Lce1h</a>              | 0.865 | -2.356 | 0.0496224  | 0.200156  |
| 17515 | 10563260 | <a href="#">NM_009224</a>          | <a href="#">20637</a>     | U1 small nuclear ribonucleopro | <a href="#">Snrp70</a>             | 0.865 | -3.574 | 0.00860491 | 0.0610135 |
| 17516 | 10400538 | <a href="#">NM_030057</a>          | <a href="#">78232</a>     | trafficking protein particle c | <a href="#">Trappe6b</a>           | 0.865 | -2.31  | 0.0531561  | 0.209143  |
| 17517 | 10395534 | <a href="#">XM_001472023</a>       | <a href="#">100039062</a> | hypothetical protein LOC100039 | <a href="#">LOC100039062</a>       | 0.865 | -1.011 | 0.344941   | 0.61898   |
| 17518 | 10480249 | <a href="#">NM_013935</a>          | <a href="#">30963</a>     | protein tyrosine phosphatase-1 | <a href="#">Ptpla</a>              | 0.865 | -1.317 | 0.228219   | 0.499214  |
| 17519 | 10590269 | <a href="#">NM_001039364</a>       | <a href="#">17433</a>     | myelin-associated oligodendroc | <a href="#">Mobp</a>               | 0.865 | -1.632 | 0.14549    | 0.387083  |
| 17520 | 10554658 | <a href="#">ENSMUST00000066005</a> | <a href="#">330578</a>    | Riken cDNA A530021J07 gene     | <a href="#">A530021J07Rik</a>      | 0.865 | -1.652 | 0.141309   | 0.38052   |
| 17521 | 10382139 | <a href="#">NM_025894</a>          | <a href="#">66997</a>     | proteasome (prosome, macropain | <a href="#">Psmc12</a>             | 0.865 | -3.075 | 0.0173005  | 0.0993755 |
| 17522 | 10430247 | <a href="#">NM_019913</a>          | <a href="#">56551</a>     | thioredoxin 2                  | <a href="#">Txn2</a>               | 0.865 | -2.615 | 0.033739   | 0.155049  |
| 17523 | 10417183 | <a href="#">NM_144844</a>          | <a href="#">110821</a>    | propionyl-Coenzyme A carboxyla | <a href="#">Pcca</a>               | 0.865 | -2.818 | 0.025049   | 0.127623  |
| 17524 | 10456793 | <a href="#">NM_025409</a>          | <a href="#">66191</a>     | immediate early response 3 int | <a href="#">Ier3ip1</a>            | 0.865 | -2.64  | 0.0325186  | 0.151516  |
| 17525 | 10559310 |                                    |                           |                                |                                    | 0.865 | -1.842 | 0.106712   | 0.32221   |
| 17526 | 10464754 | <a href="#">NM_007485</a>          | <a href="#">11854</a>     | ras homolog gene family, membe | <a href="#">Rhod</a>               | 0.865 | -1.991 | 0.0854996  | 0.280626  |
| 17527 | 10523506 | <a href="#">NM_173404</a>          | <a href="#">110075</a>    | bone morphogenetic protein 3   | <a href="#">Bmp3</a>               | 0.865 | -1.43  | 0.19466    | 0.454744  |
| 17528 | 10568593 | <a href="#">NM_028095</a>          | <a href="#">72096</a>     | methyltransferase like 10      | <a href="#">Mettl10</a>            | 0.865 | -2.04  | 0.079557   | 0.268715  |
| 17529 | 10383671 | <a href="#">NM_007879</a>          | <a href="#">13494</a>     | developmentally regulated GTP  | <a href="#">Drg1</a>               | 0.865 | -3.099 | 0.0167154  | 0.09731   |
| 17530 | 10498309 | <a href="#">NM_019410</a>          | <a href="#">18645</a>     | profilin 2                     | <a href="#">Pfn2</a>               | 0.865 | -3.06  | 0.0176533  | 0.100664  |
| 17531 | 10444098 | <a href="#">NM_020603</a>          | <a href="#">57315</a>     | WD repeat domain 46            | <a href="#">Wdr46</a>              | 0.865 | -2.845 | 0.0240974  | 0.124223  |
| 17532 | 10606301 | <a href="#">NM_025952</a>          | <a href="#">67075</a>     | magnesium transporter 1        | <a href="#">Magt1</a>              | 0.865 | -2.123 | 0.070207   | 0.248316  |
| 17533 | 10537851 | <a href="#">NM_001004357</a>       | <a href="#">66797</a>     | contactin associated protein-1 | <a href="#">Cntnap2</a>            | 0.865 | -2.362 | 0.0491565  | 0.19896   |
| 17534 | 10506627 | <a href="#">BC043687</a>           | <a href="#">230582</a>    | RIKEN cDNA 2810410C14 gene     | <a href="#">2810410C14Rik</a>      | 0.865 | -2.856 | 0.0237294  | 0.122794  |
| 17535 | 10511368 | <a href="#">NM_177730</a>          | <a href="#">242291</a>    | inositol monophosphatase domai | <a href="#">Impad1</a>             | 0.865 | -2.415 | 0.0454563  | 0.188715  |

|       |          |                                    |                        |                                |                               |       |        |            |           |
|-------|----------|------------------------------------|------------------------|--------------------------------|-------------------------------|-------|--------|------------|-----------|
| 17536 | 10584236 | <a href="#">ENSMUST00000098906</a> | <a href="#">330921</a> | gene model 846, (NCBI)         | <a href="#">Gm846</a>         | 0.865 | -2.617 | 0.0336755  | 0.154849  |
| 17537 | 10447093 | <a href="#">BC118946</a>           | <a href="#">67737</a>  | RIKEN cDNA 4930560E09 gene     | <a href="#">4930560E09Rik</a> | 0.865 | -2.688 | 0.0303349  | 0.144768  |
| 17538 | 10599960 |                                    |                        |                                |                               | 0.865 | -0.957 | 0.369734   | 0.640267  |
| 17539 | 10454254 | <a href="#">NM_207650</a>          | <a href="#">13527</a>  | dystrobrevin alpha             | <a href="#">Dtna</a>          | 0.865 | -2.17  | 0.065457   | 0.238533  |
| 17540 | 10603362 | <a href="#">NM_207202</a>          | <a href="#">54648</a>  | coiled-coil domain containing  | <a href="#">Ccdc120</a>       | 0.865 | -1.786 | 0.116063   | 0.338816  |
| 17541 | 10457022 | <a href="#">NM_010777</a>          | <a href="#">17196</a>  | myelin basic protein           | <a href="#">Mbp</a>           | 0.865 | -2.867 | 0.0233255  | 0.121327  |
| 17542 | 10518774 | <a href="#">NM_020569</a>          | <a href="#">57320</a>  | Parkinson disease (autosomal r | <a href="#">Park7</a>         | 0.865 | -2.838 | 0.0243296  | 0.125082  |
| 17543 | 10514884 | <a href="#">NM_025500</a>          | <a href="#">56280</a>  | mitochondrial ribosomal protei | <a href="#">Mrpl37</a>        | 0.865 | -2.703 | 0.0296379  | 0.142372  |
| 17544 | 10532628 |                                    |                        |                                |                               | 0.865 | -1.366 | 0.213091   | 0.478965  |
| 17545 | 10584855 | <a href="#">NM_001014761</a>       | <a href="#">72821</a>  | sodium channel, voltage-gated, | <a href="#">Scn2b</a>         | 0.865 | -2.546 | 0.0373836  | 0.166338  |
| 17546 | 10363170 | <a href="#">NR_003618</a>          | <a href="#">73390</a>  | RIKEN cDNA 1700060H10 gene     | <a href="#">1700060H10Rik</a> | 0.865 | -1.541 | 0.165864   | 0.416412  |
| 17547 | 10526381 | <a href="#">NM_008617</a>          | <a href="#">17448</a>  | malate dehydrogenase 2, NAD (m | <a href="#">Mdh2</a>          | 0.865 | -4.052 | 0.00456533 | 0.0385193 |
| 17548 | 10404717 | <a href="#">NM_026550</a>          | <a href="#">68083</a>  | PAK1 interacting protein 1     | <a href="#">Pak1ip1</a>       | 0.865 | -2.218 | 0.0609241  | 0.227796  |
| 17549 | 10576942 |                                    |                        |                                |                               | 0.865 | -1.214 | 0.26287    | 0.537432  |
| 17550 | 10453764 | <a href="#">ENSMUST00000116082</a> | <a href="#">433161</a> | predicted gene, EG433161       | <a href="#">EG433161</a>      | 0.865 | -1.713 | 0.129112   | 0.36034   |
| 17551 | 10468450 | <a href="#">ENSMUST00000071866</a> | <a href="#">433251</a> | predicted gene, EG433251       | <a href="#">EG433251</a>      | 0.864 | -0.902 | 0.396339   | 0.663741  |
| 17552 | 10593887 | <a href="#">NM_028347</a>          | <a href="#">72774</a>  | nei endonuclease VIII-like 1 ( | <a href="#">Neil1</a>         | 0.864 | -2.396 | 0.0467607  | 0.192094  |
| 17553 | 10467173 |                                    |                        |                                |                               | 0.864 | -1.384 | 0.207666   | 0.472138  |
| 17554 | 10380986 | <a href="#">NM_009439</a>          | <a href="#">22123</a>  | proteasome (prosome, macropain | <a href="#">Psmc3</a>         | 0.864 | -2.68  | 0.0306941  | 0.145809  |
| 17555 | 10497372 | <a href="#">DQ055451</a>           | <a href="#">381484</a> | SIRP beta 1 like 1 protein     | <a href="#">LOC381484</a>     | 0.864 | -1.62  | 0.1479     | 0.390122  |
| 17556 | 10494761 | <a href="#">NM_178594</a>          | <a href="#">242122</a> | V-set domain containing T cell | <a href="#">Vtcl1</a>         | 0.864 | -2.45  | 0.0431436  | 0.182497  |
| 17557 | 10497646 | <a href="#">BC050266</a>           | <a href="#">241915</a> | polyhomeotic-like 3 (Drosophil | <a href="#">Phc3</a>          | 0.864 | -1.508 | 0.174147   | 0.427126  |
| 17558 | 10479740 |                                    |                        |                                |                               | 0.864 | -1.24  | 0.253854   | 0.52814   |
| 17559 | 10560202 | <a href="#">NM_001081418</a>       | <a href="#">243842</a> | glioma tumor suppressor candid | <a href="#">Gltser1</a>       | 0.864 | -1.466 | 0.184726   | 0.442299  |
| 17560 | 10504986 | <a href="#">XR_031665</a>          | <a href="#">666761</a> | nascent polypeptide-associated | <a href="#">LOC666761</a>     | 0.864 | -1.179 | 0.275876   | 0.550733  |
| 17561 | 10405969 |                                    |                        |                                |                               | 0.864 | -1.919 | 0.0952924  | 0.300009  |
| 17562 | 10515335 | <a href="#">AK039789</a>           | <a href="#">654318</a> | RIKEN cDNA C530005A16 gene     | <a href="#">C530005A16Rik</a> | 0.864 | -1.248 | 0.251049   | 0.524992  |
| 17563 | 10548779 | <a href="#">NM_029595</a>          | <a href="#">76400</a>  | phosphatidylethanolamine bindi | <a href="#">Pbp2</a>          | 0.864 | -2.494 | 0.0403719  | 0.174923  |
| 17564 | 10382069 | <a href="#">NM_008950</a>          | <a href="#">19184</a>  | protease (prosome, macropain)  | <a href="#">Psmc5</a>         | 0.864 | -2.798 | 0.0258194  | 0.130201  |
| 17565 | 10523541 | <a href="#">NM_026826</a>          | <a href="#">68735</a>  | mitochondrial ribosomal protei | <a href="#">Mrps18c</a>       | 0.864 | -2.864 | 0.0234377  | 0.121731  |
| 17566 | 10540795 | <a href="#">NM_172161</a>          | <a href="#">108960</a> | interleukin-1 receptor-associa | <a href="#">Irak2</a>         | 0.864 | -2.327 | 0.0517556  | 0.205622  |
| 17567 | 10361191 | <a href="#">NM_181546</a>          | <a href="#">329324</a> | synaptotagmin XIV              | <a href="#">Syt14</a>         | 0.864 | -1.857 | 0.104411   | 0.31797   |
| 17568 | 10538206 | <a href="#">NM_175098</a>          | <a href="#">57895</a>  | coiled-coil domain containing  | <a href="#">Ccdc126</a>       | 0.864 | -2.039 | 0.0796864  | 0.269022  |
| 17569 | 10425890 | <a href="#">NM_028455</a>          | <a href="#">73167</a>  | RIKEN cDNA 3110043J09 gene     | <a href="#">3110043J09Rik</a> | 0.864 | -2.164 | 0.0660886  | 0.239852  |
| 17570 | 10568758 | <a href="#">ENSMUST00000068996</a> | <a href="#">77252</a>  | RIKEN cDNA 9430038I01 gene     | <a href="#">9430038I01Rik</a> | 0.864 | -3.051 | 0.0178859  | 0.101498  |
| 17571 | 10462613 | <a href="#">NM_008332</a>          | <a href="#">15958</a>  | interferon-induced protein wit | <a href="#">Ifit2</a>         | 0.864 | -1.52  | 0.171046   | 0.422803  |
| 17572 | 10500960 | <a href="#">NM_017397</a>          | <a href="#">53975</a>  | DEAD (Asp-Glu-Ala-Asp) box pol | <a href="#">Ddx20</a>         | 0.864 | -3.117 | 0.0162832  | 0.0956368 |
| 17573 | 10542555 | <a href="#">BC006653</a>           | <a href="#">620031</a> | hypothetical protein LOC620031 | <a href="#">MGC7817</a>       | 0.864 | -0.996 | 0.35155    | 0.624753  |
| 17574 | 10351345 |                                    |                        |                                |                               | 0.864 | -0.786 | 0.457005   | 0.712826  |
| 17575 | 10398085 | <a href="#">NM_028419</a>          | <a href="#">73046</a>  | glutaredoxin 5 homolog (S. cer | <a href="#">Glx5</a>          | 0.864 | -2.098 | 0.0728862  | 0.254434  |
| 17576 | 10576288 | <a href="#">NM_172287</a>          | <a href="#">234857</a> | spire homolog 2 (Drosophila)   | <a href="#">Spire2</a>        | 0.864 | -1.457 | 0.187323   | 0.445668  |
| 17577 | 10500847 | <a href="#">NM_133853</a>          | <a href="#">99470</a>  | membrane associated guanylate  | <a href="#">Magi3</a>         | 0.864 | -1.637 | 0.144395   | 0.385687  |
| 17578 | 10541873 | <a href="#">NM_025595</a>          | <a href="#">66493</a>  | mitochondrial ribosomal protei | <a href="#">Mrpl51</a>        | 0.864 | -2.737 | 0.0281936  | 0.137705  |
| 17579 | 10365290 | <a href="#">NM_021439</a>          | <a href="#">58250</a>  | carbohydrate sulfotransferase  | <a href="#">Cst11</a>         | 0.864 | -1.818 | 0.110593   | 0.329025  |
| 17580 | 10587293 | <a href="#">NM_008103</a>          | <a href="#">14531</a>  | glial cells missing homolog 1  | <a href="#">Gem1</a>          | 0.864 | -1.743 | 0.123517   | 0.351593  |
| 17581 | 10354494 | <a href="#">NM_008667</a>          | <a href="#">17936</a>  | Ngfi-A binding protein 1       | <a href="#">Nab1</a>          | 0.864 | -2.216 | 0.0611748  | 0.228316  |
| 17582 | 10393614 | <a href="#">NM_013926</a>          | <a href="#">30951</a>  | chromobox homolog 8 (Drosophil | <a href="#">Cbx8</a>          | 0.864 | -1.754 | 0.121619   | 0.348228  |
| 17583 | 10487441 | <a href="#">NM_010762</a>          | <a href="#">17153</a>  | myelin and lymphocyte protein, | <a href="#">Mal</a>           | 0.864 | -1.37  | 0.211922   | 0.477389  |
| 17584 | 10559276 | <a href="#">NM_008434</a>          | <a href="#">16535</a>  | potassium voltage-gated channe | <a href="#">Kcnq1</a>         | 0.864 | -2.497 | 0.0402282  | 0.174515  |
| 17585 | 10548699 | <a href="#">XR_035025</a>          | <a href="#">668063</a> | similar to ubiquitin-conjugati | <a href="#">LOC668063</a>     | 0.864 | -2.173 | 0.0651912  | 0.238029  |
| 17586 | 10405334 | <a href="#">NM_001033269</a>       | <a href="#">218268</a> | eukaryotic translation initiat | <a href="#">Eif4e1b</a>       | 0.864 | -1.368 | 0.212337   | 0.477959  |
| 17587 | 10404412 | <a href="#">NM_030215</a>          | <a href="#">78903</a>  | Werner helicase interacting pr | <a href="#">Wrnp1</a>         | 0.864 | -2.539 | 0.0377721  | 0.167749  |

|       |          |                                    |                           |                                |                                    |       |        |            |           |
|-------|----------|------------------------------------|---------------------------|--------------------------------|------------------------------------|-------|--------|------------|-----------|
| 17588 | 10578203 | <a href="#">NM_027998</a>          | <a href="#">71908</a>     | claudin 23                     | <a href="#">Cldn23</a>             | 0.864 | -1.785 | 0.116118   | 0.338871  |
| 17589 | 10362876 | <a href="#">NM_027772</a>          | <a href="#">71365</a>     | prenyl (solanesyl) diphosphate | <a href="#">Pdss2</a>              | 0.863 | -2.099 | 0.0727829  | 0.25432   |
| 17590 | 10540296 |                                    |                           |                                |                                    | 0.863 | -1.527 | 0.169286   | 0.42056   |
| 17591 | 10501447 | <a href="#">NM_025845</a>          | <a href="#">66921</a>     | PRP38 pre-mRNA processing fact | <a href="#">Prpf38b</a>            | 0.863 | -3.172 | 0.0150566  | 0.0906069 |
| 17592 | 10547719 | <a href="#">NM_153508</a>          | <a href="#">232370</a>    | calsyntenin 3                  | <a href="#">Clstn3</a>             | 0.863 | -1.917 | 0.0955197  | 0.300412  |
| 17593 | 10414031 | <a href="#">NM_019506</a>          | <a href="#">12165</a>     | growth differentiation factor  | <a href="#">Gdf2</a>               | 0.863 | -1.109 | 0.303017   | 0.579039  |
| 17594 | 10582025 | <a href="#">NM_029686</a>          | <a href="#">76645</a>     | polycystic kidney disease 1 li | <a href="#">Pkd112</a>             | 0.863 | -1.842 | 0.106725   | 0.32221   |
| 17595 | 10521693 |                                    |                           |                                |                                    | 0.863 | -1.52  | 0.171049   | 0.422803  |
| 17596 | 10570013 | <a href="#">NM_001081119</a>       | <a href="#">68904</a>     | abhydrolase domain containing  | <a href="#">Abhd13</a>             | 0.863 | -2.683 | 0.030535   | 0.14545   |
| 17597 | 10412823 | <a href="#">AK138270</a>           | <a href="#">77981</a>     | RIKEN cDNA B230110C06 gene     | <a href="#">B230110C06Rik</a>      | 0.863 | -0.798 | 0.450552   | 0.707814  |
| 17598 | 10396896 | <a href="#">BC117754</a>           | <a href="#">328133</a>    | solute carrier family 39 (zinc | <a href="#">Slc39a9</a>            | 0.863 | -3.386 | 0.0111488  | 0.0730722 |
| 17599 | 10434773 | <a href="#">NM_001004151</a>       | <a href="#">239766</a>    | receptor transporter protein 1 | <a href="#">Rtp1</a>               | 0.863 | -1.921 | 0.0949284  | 0.299577  |
| 17600 | 10463121 | <a href="#">NM_028319</a>          | <a href="#">72672</a>     | zinc finger protein 518        | <a href="#">Zfp518</a>             | 0.863 | -2.107 | 0.0719508  | 0.252251  |
| 17601 | 10364149 | <a href="#">NM_009115</a>          | <a href="#">20203</a>     | S100 protein, beta polypeptide | <a href="#">S100b</a>              | 0.863 | -2.499 | 0.0400883  | 0.174258  |
| 17602 | 10449854 | <a href="#">NM_017476</a>          | <a href="#">54194</a>     | A kinase (PRKA) anchor protein | <a href="#">Akap8l</a>             | 0.863 | -2.439 | 0.0438271  | 0.184341  |
| 17603 | 10593497 | <a href="#">ENSMUST00000038822</a> | <a href="#">244871</a>    | zinc finger CCCH type containi | <a href="#">Zc3h12c</a>            | 0.863 | -1.581 | 0.156746   | 0.403094  |
| 17604 | 10347508 | <a href="#">NM_170755</a>          | <a href="#">227298</a>    | cDNA sequence BC038286         | <a href="#">BC038286</a>           | 0.863 | -2.646 | 0.0322585  | 0.150768  |
| 17605 | 10473158 | <a href="#">ENSMUST00000066625</a> | <a href="#">100126874</a> | predicted gene, ENSMUSG0000005 | <a href="#">ENSMUSG00000053902</a> | 0.863 | -1.203 | 0.266795   | 0.541465  |
| 17606 | 10451591 | <a href="#">NM_025365</a>          | <a href="#">66119</a>     | prickle homolog 4 (Drosophila) | <a href="#">Prickle4</a>           | 0.863 | -1.921 | 0.0950106  | 0.299665  |
| 17607 | 10532993 | <a href="#">NM_007748</a>          | <a href="#">12861</a>     | cytochrome c oxidase, subunit  | <a href="#">Cox6a1</a>             | 0.863 | -2.644 | 0.0323404  | 0.151017  |
| 17608 | 10430993 | <a href="#">ENSMUST00000100370</a> | <a href="#">69291</a>     | RIKEN cDNA 1700001L05 gene     | <a href="#">1700001L05Rik</a>      | 0.863 | -1.642 | 0.143396   | 0.384029  |
| 17609 | 10364890 | <a href="#">NM_013651</a>          | <a href="#">20222</a>     | splicing factor 3a, subunit 2  | <a href="#">Sf3a2</a>              | 0.863 | -2.406 | 0.0460382  | 0.190346  |
| 17610 | 10424102 | <a href="#">ENSMUST00000100666</a> | <a href="#">665097</a>    | predicted gene, EG665097       | <a href="#">EG665097</a>           | 0.863 | -0.994 | 0.352209   | 0.625281  |
| 17611 | 10568040 | <a href="#">NM_019674</a>          | <a href="#">56420</a>     | protein phosphatase 4, catalyt | <a href="#">Ppp4c</a>              | 0.862 | -3.033 | 0.018371   | 0.103528  |
| 17612 | 10391768 | <a href="#">NM_011431</a>          | <a href="#">20624</a>     | elongation factor Tu GTP bindi | <a href="#">Eftud2</a>             | 0.862 | -2.524 | 0.0386277  | 0.16991   |
| 17613 | 10572235 | <a href="#">NM_020028</a>          | <a href="#">53978</a>     | lysophosphatidic acid receptor | <a href="#">Lpar2</a>              | 0.862 | -2.136 | 0.0688553  | 0.245818  |
| 17614 | 10490690 | <a href="#">NM_026765</a>          | <a href="#">68556</a>     | uridine-cytidine kinase 1-like | <a href="#">Uck1l</a>              | 0.862 | -2.142 | 0.068237   | 0.244165  |
| 17615 | 10348558 | <a href="#">NM_016717</a>          | <a href="#">50880</a>     | selenocysteine lyase           | <a href="#">Scly</a>               | 0.862 | -2     | 0.0844535  | 0.278893  |
| 17616 | 10401172 | <a href="#">NM_016800</a>          | <a href="#">53612</a>     | vesicle transport through inte | <a href="#">Vti1b</a>              | 0.862 | -3.938 | 0.00528998 | 0.0429867 |
| 17617 | 10375483 | <a href="#">XR_031591</a>          | <a href="#">628753</a>    | similar to hCG2016250          | <a href="#">LOC628753</a>          | 0.862 | -2.214 | 0.0612863  | 0.228462  |
| 17618 | 10572616 | <a href="#">BC093523</a>           | <a href="#">66498</a>     | DET1 and DDB1 associated 1     | <a href="#">Dda1</a>               | 0.862 | -2.167 | 0.0657812  | 0.239147  |
| 17619 | 10560491 | <a href="#">NM_146182</a>          | <a href="#">232943</a>    | kinesin light chain 3          | <a href="#">Klc3</a>               | 0.862 | -2.323 | 0.0520689  | 0.206366  |
| 17620 | 10549445 |                                    |                           |                                |                                    | 0.862 | -2.537 | 0.0378738  | 0.168059  |
| 17621 | 10470322 | <a href="#">NM_013678</a>          | <a href="#">20931</a>     | surfeit gene 2                 | <a href="#">Surf2</a>              | 0.862 | -2.319 | 0.0524379  | 0.207126  |
| 17622 | 10523481 |                                    |                           |                                |                                    | 0.862 | -1.425 | 0.196018   | 0.456422  |
| 17623 | 10381371 | <a href="#">NM_009675</a>          | <a href="#">11754</a>     | amine oxidase, copper containi | <a href="#">Aoc3</a>               | 0.862 | -1.857 | 0.104487   | 0.318109  |
| 17624 | 10465500 | <a href="#">NM_008431</a>          | <a href="#">16528</a>     | potassium channel, subfamily K | <a href="#">Kcnk4</a>              | 0.862 | -2.016 | 0.0823696  | 0.274487  |
| 17625 | 10446804 | <a href="#">NM_144798</a>          | <a href="#">210148</a>    | solute carrier family 30 (zinc | <a href="#">Slc30a6</a>            | 0.862 | -2.388 | 0.0473125  | 0.193459  |
| 17626 | 10493120 | <a href="#">NM_025663</a>          | <a href="#">66614</a>     | G patch domain containing 4    | <a href="#">Gpatch4</a>            | 0.862 | -2.644 | 0.03234    | 0.151017  |
| 17627 | 10501218 | <a href="#">NM_010359</a>          | <a href="#">14864</a>     | glutathione S-transferase, mu  | <a href="#">Gstm3</a>              | 0.862 | -0.997 | 0.351173   | 0.624551  |
| 17628 | 10597132 |                                    |                           |                                |                                    | 0.862 | -1.96  | 0.0896436  | 0.289031  |
| 17629 | 10440554 | <a href="#">NM_001081068</a>       | <a href="#">78913</a>     | zinc finger protein 294        | <a href="#">Zfp294</a>             | 0.862 | -1.323 | 0.226237   | 0.496889  |
| 17630 | 10365206 | <a href="#">ENSMUST00000099431</a> | <a href="#">666790</a>    | predicted gene, EG666790       | <a href="#">EG666790</a>           | 0.862 | -1.137 | 0.291834   | 0.567841  |
| 17631 | 10443506 | <a href="#">NM_013710</a>          | <a href="#">26382</a>     | FYVE, RhoGEF and PH domain con | <a href="#">Fgd2</a>               | 0.862 | -1.213 | 0.263261   | 0.538023  |
| 17632 | 10426905 | <a href="#">NM_001034883</a>       | <a href="#">432982</a>    | predicted gene, EG432982       | <a href="#">EG432982</a>           | 0.862 | -0.87  | 0.412327   | 0.676163  |
| 17633 | 10442752 | <a href="#">BC027751</a>           | <a href="#">68327</a>     | RIKEN cDNA 0610007P22 gene     | <a href="#">0610007P22Rik</a>      | 0.862 | -3.249 | 0.0135041  | 0.0837087 |
| 17634 | 10529547 |                                    |                           |                                |                                    | 0.862 | -2.538 | 0.0378589  | 0.168029  |
| 17635 | 10426924 | <a href="#">NM_021530</a>          | <a href="#">59033</a>     | solute carrier family 4 (anion | <a href="#">Slc4a8</a>             | 0.862 | -2.216 | 0.0611436  | 0.228252  |
| 17636 | 10550402 | <a href="#">NM_001007569</a>       | <a href="#">71691</a>     | PNMA-like 1                    | <a href="#">Pnmall</a>             | 0.862 | -2.054 | 0.0779053  | 0.265468  |
| 17637 | 10367436 | <a href="#">NM_001042580</a>       | <a href="#">12512</a>     | Cd63 antigen                   | <a href="#">Cd63</a>               | 0.862 | -2.359 | 0.049386   | 0.199621  |
| 17638 | 10489219 | <a href="#">NM_177657</a>          | <a href="#">228846</a>    | RIKEN cDNA D630003M21 gene     | <a href="#">D630003M21Rik</a>      | 0.862 | -2.816 | 0.0251449  | 0.127896  |
| 17639 | 10427459 | <a href="#">ENSMUST00000055038</a> | <a href="#">239319</a>    | caspase recruitment domain fam | <a href="#">Card6</a>              | 0.862 | -2.241 | 0.05888    | 0.223325  |
| 17640 | 10416948 |                                    |                           |                                |                                    | 0.862 | -1.377 | 0.209657   | 0.474726  |
| 17641 | 10510022 | <a href="#">ENSMUST00000007813</a> | <a href="#">100165</a>    | predicted gene, EG1507507      | <a href="#">EG1507507</a>          | 0.862 | -1.462 | 0.185661   | 0.412597  |

|       |          |                                   |                           |                                   |                                    |       |        |            |           |
|-------|----------|-----------------------------------|---------------------------|-----------------------------------|------------------------------------|-------|--------|------------|-----------|
| 17641 | 10510022 | <a href="#">ENSMUS10000097812</a> | <a href="#">100103</a>    | expressed sequence A1507597       | <a href="#">A1507597</a>           | 0.862 | -1.463 | 0.183601   | 0.4433387 |
| 17642 | 10375553 | <a href="#">NM_147066</a>         | <a href="#">259069</a>    | olfactory receptor 1389           | <a href="#">Olfr1389</a>           | 0.862 | -2.519 | 0.0389103  | 0.17083   |
| 17643 | 10472809 | <a href="#">NM_010053</a>         | <a href="#">13390</a>     | distal-less homeobox 1            | <a href="#">Dlx1</a>               | 0.862 | -1.378 | 0.209399   | 0.474598  |
| 17644 | 10498038 | <a href="#">NM_023502</a>         | <a href="#">69257</a>     | E74-like factor 2                 | <a href="#">Elf2</a>               | 0.862 | -2.321 | 0.0522468  | 0.206719  |
| 17645 | 10568861 | <a href="#">XR_030607</a>         | <a href="#">244229</a>    | similar to ribosomal protein S    | <a href="#">LOC244229</a>          | 0.862 | -2.356 | 0.0496078  | 0.200156  |
| 17646 | 10395893 | <a href="#">NM_025656</a>         | <a href="#">66603</a>     | survivor of motor neuron prote    | <a href="#">Sip1</a>               | 0.862 | -2.454 | 0.0428807  | 0.181734  |
| 17647 | 10604053 | <a href="#">NM_029891</a>         | <a href="#">77286</a>     | NF-kappaB repressing factor       | <a href="#">Nkrf</a>               | 0.862 | -2.118 | 0.070768   | 0.249678  |
| 17648 | 10540676 | <a href="#">NM_026365</a>         | <a href="#">67767</a>     | jagunal homolog 1 (Drosophila)    | <a href="#">Jagn1</a>              | 0.862 | -2.91  | 0.0219148  | 0.116412  |
| 17649 | 10413229 | <a href="#">NM_013469</a>         | <a href="#">11744</a>     | annexin A11                       | <a href="#">Anxa11</a>             | 0.861 | -2.74  | 0.0280818  | 0.137509  |
| 17650 | 10561153 | <a href="#">NM_001081148</a>      | <a href="#">243881</a>    | cytochrome P450, family 2, sub    | <a href="#">Cyp2b23</a>            | 0.861 | -1.292 | 0.236262   | 0.508392  |
| 17651 | 10397145 | <a href="#">NM_134188</a>         | <a href="#">171210</a>    | acyl-CoA thioesterase 2           | <a href="#">Acot2</a>              | 0.861 | -1.179 | 0.275762   | 0.550639  |
| 17652 | 10565709 | <a href="#">NM_001081167</a>      | <a href="#">272411</a>    | UDP-GlcNAc:betaGal beta-1,3-N-    | <a href="#">B3gnt6</a>             | 0.861 | -1.729 | 0.126173   | 0.355658  |
| 17653 | 10550482 | <a href="#">NM_001003393</a>      | <a href="#">232925</a>    | IGF-like family member 3          | <a href="#">Igf13</a>              | 0.861 | -1.865 | 0.103187   | 0.315516  |
| 17654 | 10477061 | <a href="#">NM_029688</a>         | <a href="#">76650</a>     | sulfiredoxin 1 homolog (S. cer    | <a href="#">Srxn1</a>              | 0.861 | -2.168 | 0.0657281  | 0.239036  |
| 17655 | 10471735 | <a href="#">NM_001081410</a>      | <a href="#">666118</a>    | olfactory receptor 335            | <a href="#">Olfr335</a>            | 0.861 | -1.456 | 0.187524   | 0.445758  |
| 17656 | 10460490 |                                   |                           |                                   |                                    | 0.861 | -2.315 | 0.0527425  | 0.207909  |
| 17657 | 10454653 |                                   |                           |                                   |                                    | 0.861 | -1.23  | 0.257463   | 0.531656  |
| 17658 | 10517808 | <a href="#">NM_011060</a>         | <a href="#">18601</a>     | peptidyl arginine deiminase, t    | <a href="#">Padi3</a>              | 0.861 | -2.157 | 0.0668003  | 0.24144   |
| 17659 | 10588035 | <a href="#">XR_031771</a>         | <a href="#">667298</a>    | similar to ribosomal protein S    | <a href="#">LOC667298</a>          | 0.861 | -2.926 | 0.0214313  | 0.114576  |
| 17660 | 10383717 | <a href="#">NM_172439</a>         | <a href="#">170835</a>    | phosphatidylinositol (4,5) bis    | <a href="#">Pib5pa</a>             | 0.861 | -2.489 | 0.0407174  | 0.175879  |
| 17661 | 10476941 |                                   |                           |                                   |                                    | 0.861 | -1.892 | 0.0992119  | 0.307631  |
| 17662 | 10535084 | <a href="#">NM_028469</a>         | <a href="#">73212</a>     | RIKEN cDNA 3110082117 gene        | <a href="#">3110082117Rik</a>      | 0.861 | -2.303 | 0.0536674  | 0.210176  |
| 17663 | 10416044 | <a href="#">NM_145944</a>         | <a href="#">67179</a>     | coiled-coil domain containing     | <a href="#">Ccdc25</a>             | 0.861 | -2.425 | 0.044743   | 0.187121  |
| 17664 | 10415737 | <a href="#">NM_183175</a>         | <a href="#">239126</a>    | C1q and tumor necrosis factor     | <a href="#">C1qtnf9</a>            | 0.861 | -0.907 | 0.393696   | 0.661649  |
| 17665 | 10485550 | <a href="#">NM_001033347</a>      | <a href="#">241589</a>    | RIKEN cDNA D430041D05 gene        | <a href="#">D430041D05Rik</a>      | 0.861 | -2.128 | 0.0697803  | 0.247552  |
| 17666 | 10560630 | <a href="#">NM_001109748</a>      | <a href="#">53333</a>     | translocase of outer mitochond    | <a href="#">Tomm40</a>             | 0.861 | -2.58  | 0.0355727  | 0.160632  |
| 17667 | 10434675 | <a href="#">NM_026400</a>         | <a href="#">67838</a>     | DnaJ (Hsp40) homolog, subfamil    | <a href="#">Dnajb11</a>            | 0.861 | -2.742 | 0.0279968  | 0.137267  |
| 17668 | 10474870 | <a href="#">NM_173450</a>         | <a href="#">271842</a>    | RNA pseudouridylyl synthase d     | <a href="#">Rpusd2</a>             | 0.861 | -3.071 | 0.0173916  | 0.0997203 |
| 17669 | 10430768 | <a href="#">XR_031503</a>         | <a href="#">667073</a>    | similar to ribosomal protein L    | <a href="#">LOC667073</a>          | 0.861 | -1.714 | 0.128932   | 0.36017   |
| 17670 | 10476660 | <a href="#">BC063088</a>          | <a href="#">74528</a>     | RIKEN cDNA 8430406107 gene        | <a href="#">8430406107Rik</a>      | 0.861 | -1.928 | 0.0940224  | 0.297695  |
| 17671 | 10479514 | <a href="#">BC016112</a>          | <a href="#">73368</a>     | collagen, type XX, alpha 1        | <a href="#">Col20a1</a>            | 0.861 | -1.437 | 0.192746   | 0.452222  |
| 17672 | 10523843 |                                   |                           |                                   |                                    | 0.861 | -0.954 | 0.371107   | 0.641955  |
| 17673 | 10509571 | <a href="#">NM_008868</a>         | <a href="#">18781</a>     | phospholipase A2, group IIC       | <a href="#">Pla2g2c</a>            | 0.861 | -1.84  | 0.107082   | 0.322599  |
| 17674 | 10400131 | <a href="#">XM_001471947</a>      | <a href="#">791391</a>    | predicted gene,<br>ENSMUSG0000006 | <a href="#">ENSMUSG00000066507</a> | 0.861 | -0.799 | 0.449852   | 0.707187  |
| 17675 | 10517980 | <a href="#">NM_145987</a>         | <a href="#">213989</a>    | transmembrane protein 82          | <a href="#">Tmem82</a>             | 0.861 | -1.171 | 0.278645   | 0.553572  |
| 17676 | 10388010 | <a href="#">NM_007573</a>         | <a href="#">12261</a>     | complement component 1, q subc    | <a href="#">C1qbp</a>              | 0.861 | -3.304 | 0.0124967  | 0.0790871 |
| 17677 | 10432492 | <a href="#">NM_028224</a>         | <a href="#">72393</a>     | Fas apoptotic inhibitory molec    | <a href="#">Faim2</a>              | 0.861 | -1.201 | 0.267667   | 0.542452  |
| 17678 | 10512626 | <a href="#">NM_019486</a>         | <a href="#">56015</a>     | olfactory receptor 71             | <a href="#">Olfr71</a>             | 0.861 | -1.359 | 0.215018   | 0.481962  |
| 17679 | 10364102 | <a href="#">NM_175329</a>         | <a href="#">103172</a>    | Nur77 downstream gene 2           | <a href="#">Ndg2</a>               | 0.861 | -1.897 | 0.098436   | 0.306348  |
| 17680 | 10365337 |                                   |                           |                                   |                                    | 0.861 | -3.152 | 0.0155016  | 0.0924565 |
| 17681 | 10352756 | <a href="#">NM_172266</a>         | <a href="#">226856</a>    | lysophosphatidylglycerol acylt    | <a href="#">Lpgat1</a>             | 0.861 | -2.903 | 0.0221505  | 0.117205  |
| 17682 | 10526553 | <a href="#">NM_001039385</a>      | <a href="#">381677</a>    | VGF nerve growth factor induci    | <a href="#">Vgf</a>                | 0.861 | -1.845 | 0.106273   | 0.321598  |
| 17683 | 10542824 | <a href="#">NM_145573</a>         | <a href="#">232536</a>    | mitochondrial ribosomal protei    | <a href="#">Mrps35</a>             | 0.861 | -4.078 | 0.00441403 | 0.0375122 |
| 17684 | 10417700 | <a href="#">XR_033308</a>         | <a href="#">667152</a>    | enolase 1, alpha non-neuron ps    | <a href="#">LOC667152</a>          | 0.861 | -1.751 | 0.122223   | 0.349463  |
| 17685 | 10365260 | <a href="#">NM_001042523</a>      | <a href="#">50493</a>     | thioredoxin reductase 1           | <a href="#">Txnrd1</a>             | 0.861 | -3.009 | 0.0190162  | 0.106006  |
| 17686 | 10533090 | <a href="#">NM_028128</a>         | <a href="#">72151</a>     | replication factor C (activato    | <a href="#">Rfc5</a>               | 0.861 | -2.965 | 0.0202358  | 0.110703  |
| 17687 | 10362896 | <a href="#">NM_009846</a>         | <a href="#">12484</a>     | CD24a antigen                     | <a href="#">Cd24a</a>              | 0.861 | -2.871 | 0.0231914  | 0.120967  |
| 17688 | 10491922 | <a href="#">NM_053089</a>         | <a href="#">74838</a>     | NMDA receptor-regulated gene 1    | <a href="#">Narg1</a>              | 0.861 | -2.58  | 0.035554   | 0.160597  |
| 17689 | 10520304 | <a href="#">NM_001004365</a>      | <a href="#">242894</a>    | ARP3 actin-related protein 3 h    | <a href="#">Actr3b</a>             | 0.861 | -3.558 | 0.00880444 | 0.062033  |
| 17690 | 10525111 | <a href="#">NM_028041</a>         | <a href="#">71990</a>     | DEAD (Asp-Glu-Ala-Asp) box pol    | <a href="#">Ddx54</a>              | 0.861 | -3.387 | 0.0111291  | 0.0729652 |
| 17691 | 10392839 | <a href="#">NM_172050</a>         | <a href="#">217306</a>    | CD300e antigen                    | <a href="#">Cd300e</a>             | 0.861 | -1.265 | 0.245235   | 0.518331  |
| 17692 | 10552311 | <a href="#">XR_031416</a>         | <a href="#">100045562</a> | similar to ornithine decarboxy    | <a href="#">LOC100045562</a>       | 0.861 | -1.759 | 0.12078    | 0.347262  |

|       |          |                                    |                           |                                 |                                    |       |        |            |           |
|-------|----------|------------------------------------|---------------------------|---------------------------------|------------------------------------|-------|--------|------------|-----------|
| 17695 | 10472940 | <a href="#">NM_008272</a>          | <a href="#">15433</a>     | homeo box D15                   | <a href="#">Hoxd13</a>             | 0.861 | -1.752 | 0.12556    | 0.354782  |
| 17694 | 10399710 | <a href="#">NM_021384</a>          | <a href="#">58185</a>     | radical S-adenosyl methionine   | <a href="#">Rsad2</a>              | 0.86  | -1.245 | 0.252122   | 0.526247  |
| 17695 | 10400559 |                                    |                           |                                 |                                    | 0.86  | -2.155 | 0.0669813  | 0.241723  |
| 17696 | 10421922 |                                    |                           |                                 |                                    | 0.86  | -1.59  | 0.154656   | 0.399843  |
| 17697 | 10564849 | <a href="#">BC031379</a>           | <a href="#">70420</a>     | RIKEN cDNA 2610034B18 gene      | <a href="#">2610034B18Rik</a>      | 0.86  | -2.98  | 0.0198131  | 0.109209  |
| 17698 | 10384322 | <a href="#">NM_008316</a>          | <a href="#">15574</a>     | Hus1 homolog (S. pombe)         | <a href="#">Hus1</a>               | 0.86  | -3.915 | 0.00545813 | 0.043998  |
| 17699 | 10440206 | <a href="#">NM_019665</a>          | <a href="#">56297</a>     | ADP-ribosylation factor-like 6  | <a href="#">Arl6</a>               | 0.86  | -2.533 | 0.0381441  | 0.168763  |
| 17700 | 10515132 |                                    |                           |                                 |                                    | 0.86  | -2.668 | 0.0312261  | 0.147673  |
| 17701 | 10460303 | <a href="#">NM_013878</a>          | <a href="#">29866</a>     | calcium binding protein 2       | <a href="#">Cabp2</a>              | 0.86  | -2.001 | 0.0843459  | 0.278694  |
| 17702 | 10474902 | <a href="#">NM_011234</a>          | <a href="#">19361</a>     | RAD51 homolog (S. cerevisiae)   | <a href="#">Rad51</a>              | 0.86  | -2.769 | 0.026934   | 0.133527  |
| 17703 | 10429506 | <a href="#">NM_026671</a>          | <a href="#">68311</a>     | Ly6/Plaur domain containing 2   | <a href="#">Lypd2</a>              | 0.86  | -1.337 | 0.221728   | 0.491272  |
| 17704 | 10481531 | <a href="#">BC005624</a>           | <a href="#">227707</a>    | cDNA sequence BC005624          | <a href="#">BC005624</a>           | 0.86  | -4.148 | 0.00403509 | 0.0352117 |
| 17705 | 10573217 | <a href="#">NM_197982</a>          | <a href="#">68278</a>     | DEAD (Asp-Glu-Ala-Asp) box      | <a href="#">Ddx39</a>              | 0.86  | -2.742 | 0.0280006  | 0.137267  |
| 17706 | 10373218 | <a href="#">NM_183297</a>          | <a href="#">104080</a>    | <sup>pol</sup> heurexophilin 4  | <a href="#">Nxph4</a>              | 0.86  | -2.29  | 0.0547713  | 0.213354  |
| 17707 | 10365123 | <a href="#">AK080664</a>           | <a href="#">102115</a>    | deoxyhypusine hydroxylase/mono  | <a href="#">Dohh</a>               | 0.86  | -1.535 | 0.167368   | 0.418358  |
| 17708 | 10394471 | <a href="#">NM_011519</a>          | <a href="#">20969</a>     | syndecan 1                      | <a href="#">Sdc1</a>               | 0.86  | -1.663 | 0.139029   | 0.377126  |
| 17709 | 10408321 | <a href="#">NM_020567</a>          | <a href="#">57441</a>     | geminin                         | <a href="#">Gmn</a>                | 0.86  | -2.268 | 0.056561   | 0.21744   |
| 17710 | 10472514 | <a href="#">NM_181547</a>          | <a href="#">329416</a>    | nitric oxide synthase traffick  | <a href="#">Nostrin</a>            | 0.86  | -1.764 | 0.119872   | 0.346111  |
| 17711 | 10500360 | <a href="#">ENSMUST00000107095</a> | <a href="#">100038464</a> | predicted gene, OTTMUSG00000002 | <a href="#">OTTMUSG00000021867</a> | 0.86  | -1.578 | 0.157294   | 0.403864  |
| 17712 | 10421046 | <a href="#">NM_177780</a>          | <a href="#">68813</a>     | dedicator of cytokinesis 5      | <a href="#">Dock5</a>              | 0.86  | -2.195 | 0.0630842  | 0.232827  |
| 17713 | 10488938 | <a href="#">BC113797</a>           | <a href="#">71405</a>     | RIKEN cDNA 5530400B04 gene      | <a href="#">5530400B04Rik</a>      | 0.86  | -1.147 | 0.288017   | 0.563886  |
| 17714 | 10562599 | <a href="#">XM_973360</a>          | <a href="#">434168</a>    | predicted gene, EG434168        | <a href="#">EG434168</a>           | 0.86  | -2.388 | 0.0472605  | 0.193319  |
| 17715 | 10503926 | <a href="#">NM_181406</a>          | <a href="#">109093</a>    | arginyl-tRNA synthetase 2, mit  | <a href="#">Rars2</a>              | 0.86  | -2.361 | 0.0492485  | 0.199218  |
| 17716 | 10533180 |                                    |                           |                                 |                                    | 0.86  | -1.869 | 0.102653   | 0.314472  |
| 17717 | 10398859 | <a href="#">NM_007421</a>          | <a href="#">11565</a>     | adenylosuccinate synthetase li  | <a href="#">Adssl1</a>             | 0.86  | -1.763 | 0.120053   | 0.346527  |
| 17718 | 10504672 | <a href="#">NM_146142</a>          | <a href="#">100121</a>    | tudor domain containing 7       | <a href="#">Tdrd7</a>              | 0.86  | -2.419 | 0.0451659  | 0.187967  |
| 17719 | 10585201 | <a href="#">NM_013897</a>          | <a href="#">30057</a>     | translocase of inner mitochond  | <a href="#">Timm8b</a>             | 0.86  | -3.631 | 0.00797125 | 0.0578394 |
| 17720 | 10423803 | <a href="#">XR_032597</a>          | <a href="#">382986</a>    | ferritin light chain 1 pseudog  | <a href="#">LOC382986</a>          | 0.86  | -1.363 | 0.213857   | 0.480173  |
| 17721 | 10480317 | <a href="#">NM_026627</a>          | <a href="#">68231</a>     | RIKEN cDNA 1700113O17 gene      | <a href="#">1700113O17Rik</a>      | 0.86  | -2.001 | 0.0843139  | 0.278691  |
| 17722 | 10589130 | <a href="#">NM_080437</a>          | <a href="#">107934</a>    | cadherin, EGF LAG seven-pass G  | <a href="#">Celsr3</a>             | 0.86  | -2.084 | 0.0744181  | 0.258046  |
| 17723 | 10420804 | <a href="#">BC115562</a>           | <a href="#">71037</a>     | RIKEN cDNA 4933401F05 gene      | <a href="#">4933401F05Rik</a>      | 0.86  | -1.258 | 0.247433   | 0.520777  |
| 17724 | 10509053 | <a href="#">NM_174851</a>          | <a href="#">242700</a>    | interleukin 28 receptor alpha   | <a href="#">Il28ra</a>             | 0.86  | -1.862 | 0.103637   | 0.316489  |
| 17725 | 10390271 | <a href="#">NM_008686</a>          | <a href="#">18023</a>     | nuclear factor, erythroid deri  | <a href="#">Nfe2l1</a>             | 0.859 | -2.82  | 0.0249757  | 0.127526  |
| 17726 | 10597612 | <a href="#">NM_133980</a>          | <a href="#">102570</a>    | solute carrier family 22 (orga  | <a href="#">Slc22a13</a>           | 0.859 | -1.138 | 0.291565   | 0.567624  |
| 17727 | 10484402 | <a href="#">NM_007615</a>          | <a href="#">12388</a>     | catenin (cadherin associated p  | <a href="#">Ctnd1</a>              | 0.859 | -3.325 | 0.0121331  | 0.0774348 |
| 17728 | 10353686 | <a href="#">ENSMUST00000065469</a> | <a href="#">791350</a>    | predicted gene, ENSMUSG00000005 | <a href="#">ENSMUSG00000053185</a> | 0.859 | -1.215 | 0.262558   | 0.536954  |
| 17729 | 10384603 | <a href="#">NM_008618</a>          | <a href="#">17449</a>     | malate dehydrogenase 1, NAD (s  | <a href="#">Mdh1</a>               | 0.859 | -3.33  | 0.0120562  | 0.077029  |
| 17730 | 10478124 | <a href="#">NM_009508</a>          | <a href="#">22348</a>     | solute carrier family 32 (GABA  | <a href="#">Slc32a1</a>            | 0.859 | -1.866 | 0.103085   | 0.31534   |
| 17731 | 10384064 | <a href="#">NM_007595</a>          | <a href="#">12323</a>     | calcium/calmodulin-dependent p  | <a href="#">Camk2b</a>             | 0.859 | -2.15  | 0.067512   | 0.242726  |
| 17732 | 10506452 | <a href="#">AY512949</a>           | <a href="#">791274</a>    | predicted gene, ENSMUSG00000006 | <a href="#">ENSMUSG00000066088</a> | 0.859 | -1.209 | 0.264843   | 0.540056  |
| 17733 | 10550250 | <a href="#">NM_133727</a>          | <a href="#">70394</a>     | kaptin                          | <a href="#">Kptn</a>               | 0.859 | -1.847 | 0.106025   | 0.321127  |
| 17734 | 10361282 | <a href="#">NM_013499</a>          | <a href="#">12946</a>     | complement component (3b/4b) r  | <a href="#">Cr1l</a>               | 0.859 | -3.644 | 0.00783165 | 0.0571403 |
| 17735 | 10365590 | <a href="#">NM_026070</a>          | <a href="#">67282</a>     | coiled-coil domain containing   | <a href="#">Cede53</a>             | 0.859 | -3.015 | 0.0188444  | 0.105433  |
| 17736 | 10458086 | <a href="#">XM_001474242</a>       | <a href="#">669999</a>    | hypothetical protein LOC669999  | <a href="#">LOC669999</a>          | 0.859 | -1.19  | 0.271602   | 0.546245  |
| 17737 | 10362669 | <a href="#">ENSMUST00000099957</a> | <a href="#">75299</a>     | RIKEN cDNA 4930547M16 gene      | <a href="#">4930547M16Rik</a>      | 0.859 | -1.391 | 0.205671   | 0.469421  |
| 17738 | 10360794 | <a href="#">NM_175127</a>          | <a href="#">67948</a>     | F-box protein 28                | <a href="#">Fbxo28</a>             | 0.859 | -3.218 | 0.0141131  | 0.0863198 |
| 17739 | 10435048 | <a href="#">NM_025329</a>          | <a href="#">66061</a>     | Tctex1 domain containing 2      | <a href="#">Tctex1d2</a>           | 0.859 | -1.857 | 0.104464   | 0.318087  |
| 17740 | 10359080 |                                    |                           |                                 |                                    | 0.859 | -2.946 | 0.0208153  | 0.112967  |
| 17741 | 10364035 | <a href="#">BC082775</a>           | <a href="#">544707</a>    | predicted gene, EG544707        | <a href="#">EG544707</a>           | 0.859 | -2.044 | 0.0790819  | 0.267794  |

|       |          |                                    |                           |                                |                                    |       |        |            |           |
|-------|----------|------------------------------------|---------------------------|--------------------------------|------------------------------------|-------|--------|------------|-----------|
| 17742 | 10405058 | <a href="#">NM_012050</a>          | <a href="#">27047</a>     | osteomodulin                   | <a href="#">Omd</a>                | 0.859 | -1.003 | 0.348231   | 0.622132  |
| 17743 | 10384150 | <a href="#">ENSMUST00000059507</a> | <a href="#">19291</a>     | purine rich element binding pr | <a href="#">Purb</a>               | 0.859 | -1.443 | 0.191138   | 0.450298  |
| 17744 | 10399228 | <a href="#">XR_034503</a>          | <a href="#">627245</a>    | similar to Odc1 protein        | <a href="#">LOC627245</a>          | 0.859 | -3.35  | 0.0117274  | 0.0755987 |
| 17745 | 10466361 | <a href="#">NM_146741</a>          | <a href="#">258736</a>    | olfactory receptor 1497        | <a href="#">Olfr1497</a>           | 0.859 | -1.505 | 0.174849   | 0.427987  |
| 17746 | 10437376 | <a href="#">NM_175347</a>          | <a href="#">106393</a>    | sarcalumenin                   | <a href="#">Srl</a>                | 0.859 | -2.591 | 0.0350025  | 0.159     |
| 17747 | 10444886 | <a href="#">BC107265</a>           | <a href="#">69542</a>     | RIKEN cDNA 2300002M23 gene     | <a href="#">2300002M23Rik</a>      | 0.859 | -1.705 | 0.130779   | 0.362933  |
| 17748 | 10409684 |                                    |                           |                                |                                    | 0.859 | -2.354 | 0.0497697  | 0.20052   |
| 17749 | 10506736 | <a href="#">NM_010760</a>          | <a href="#">17149</a>     | mago-nashi homolog, proliferat | <a href="#">Magoh</a>              | 0.859 | -3.005 | 0.0191071  | 0.106344  |
| 17750 | 10365887 | <a href="#">NM_025551</a>          | <a href="#">66414</a>     | NADH dehydrogenase (ubiquinone | <a href="#">Ndufa12</a>            | 0.859 | -2.605 | 0.0342702  | 0.156774  |
| 17751 | 10440300 |                                    |                           |                                |                                    | 0.859 | -2.345 | 0.0504255  | 0.202084  |
| 17752 | 10400803 |                                    |                           |                                |                                    | 0.859 | -0.974 | 0.361642   | 0.633308  |
| 17753 | 10488156 | <a href="#">NM_001081133</a>       | <a href="#">16558</a>     | kinesin family member 16B      | <a href="#">Kif16b</a>             | 0.859 | -2.206 | 0.0620683  | 0.230322  |
| 17754 | 10552071 | <a href="#">NM_175240</a>          | <a href="#">76415</a>     | transmembrane protein 162      | <a href="#">Tmem162</a>            | 0.858 | -2.022 | 0.0816636  | 0.272831  |
| 17755 | 10484488 | <a href="#">NM_145526</a>          | <a href="#">228139</a>    | purinergic receptor P2X, ligan | <a href="#">P2rx3</a>              | 0.858 | -1.305 | 0.231875   | 0.502642  |
| 17756 | 10376887 |                                    |                           |                                |                                    | 0.858 | -1.467 | 0.18446    | 0.442045  |
| 17757 | 10398444 |                                    |                           |                                |                                    | 0.858 | -1.38  | 0.208834   | 0.473827  |
| 17758 | 10551529 |                                    |                           |                                |                                    | 0.858 | -2.079 | 0.0750103  | 0.258984  |
| 17759 | 10597258 | <a href="#">NM_146260</a>          | <a href="#">20776</a>     | transmembrane inner ear        | <a href="#">Tmie</a>               | 0.858 | -1.824 | 0.109632   | 0.327224  |
| 17760 | 10433212 | <a href="#">NM_008762</a>          | <a href="#">18312</a>     | olfactory receptor 15          | <a href="#">Olfr15</a>             | 0.858 | -1.566 | 0.160014   | 0.407336  |
| 17761 | 10603627 | <a href="#">NM_175045</a>          | <a href="#">71458</a>     | Bcl6 interacting corepressor   | <a href="#">Bcor</a>               | 0.858 | -2.289 | 0.0548564  | 0.213516  |
| 17762 | 10392087 | <a href="#">NM_026009</a>          | <a href="#">67163</a>     | coiled-coil domain containing  | <a href="#">Ccdc47</a>             | 0.858 | -3.033 | 0.0183488  | 0.10343   |
| 17763 | 10373986 | <a href="#">NM_007454</a>          | <a href="#">11764</a>     | adaptor protein complex AP-1,  | <a href="#">Ap1b1</a>              | 0.858 | -3.227 | 0.0139358  | 0.0856066 |
| 17764 | 10488237 | <a href="#">NM_024225</a>          | <a href="#">69178</a>     | sorting nexin 5                | <a href="#">Snx5</a>               | 0.858 | -3.621 | 0.00807281 | 0.058396  |
| 17765 | 10395682 | <a href="#">ENSMUST00000077293</a> | <a href="#">544864</a>    | predicted gene, EG544864       | <a href="#">EG544864</a>           | 0.858 | -2.63  | 0.0330318  | 0.153264  |
| 17766 | 10522465 | <a href="#">ENSMUST00000066220</a> | <a href="#">70036</a>     | RIKEN cDNA 2700023E23 gene     | <a href="#">2700023E23Rik</a>      | 0.858 | -2.473 | 0.0416748  | 0.178117  |
| 17767 | 10523526 | <a href="#">ENSMUST00000066813</a> | <a href="#">791375</a>    | predicted gene, ENSMUSG0000005 | <a href="#">ENSMUSG00000054032</a> | 0.858 | -1.517 | 0.171709   | 0.423956  |
| 17768 | 10588509 | <a href="#">NM_021567</a>          | <a href="#">59092</a>     | poly(rC) binding protein 4     | <a href="#">Pcbp4</a>              | 0.858 | -2.8   | 0.0257149  | 0.129873  |
| 17769 | 10547916 | <a href="#">NM_026988</a>          | <a href="#">69202</a>     | parathymosin                   | <a href="#">Ptms</a>               | 0.858 | -1.62  | 0.147981   | 0.390187  |
| 17770 | 10387689 | <a href="#">NM_153143</a>          | <a href="#">216858</a>    | potassium channel tetramerisat | <a href="#">Kctd11</a>             | 0.858 | -2.092 | 0.0735962  | 0.256362  |
| 17771 | 10603625 |                                    |                           |                                |                                    | 0.858 | -1.461 | 0.186264   | 0.444461  |
| 17772 | 10457614 | <a href="#">NM_009700</a>          | <a href="#">11829</a>     | aquaporin 4                    | <a href="#">Aqp4</a>               | 0.858 | -2.706 | 0.0295445  | 0.142007  |
| 17773 | 10599369 | <a href="#">NM_009688</a>          | <a href="#">11798</a>     | X-linked inhibitor of apoptosi | <a href="#">Xiap</a>               | 0.858 | -1.747 | 0.022878   | 0.350766  |
| 17774 | 10437149 |                                    |                           |                                |                                    | 0.858 | -2.11  | 0.0716215  | 0.251535  |
| 17775 | 10503361 |                                    |                           |                                |                                    | 0.858 | -1.639 | 0.143986   | 0.384952  |
| 17776 | 10388679 |                                    |                           |                                |                                    | 0.858 | -2.125 | 0.0700598  | 0.248007  |
| 17777 | 10538783 | <a href="#">BC119578</a>           | <a href="#">243407</a>    | RIKEN cDNA C130060K24 gene     | <a href="#">C130060K24Rik</a>      | 0.858 | -1.394 | 0.204844   | 0.4682    |
| 17778 | 10566026 | <a href="#">NM_008035</a>          | <a href="#">14276</a>     | folate receptor 2 (fetal)      | <a href="#">Folr2</a>              | 0.858 | -1.365 | 0.213339   | 0.479304  |
| 17779 | 10438585 | <a href="#">NM_025693</a>          | <a href="#">66664</a>     | transmembrane protein 41a      | <a href="#">Tmem41a</a>            | 0.858 | -2.075 | 0.0754467  | 0.259643  |
| 17780 | 10512308 | <a href="#">NM_011014</a>          | <a href="#">18391</a>     | opioid receptor, sigma 1       | <a href="#">Oprs1</a>              | 0.858 | -2.199 | 0.0626775  | 0.231769  |
| 17781 | 10398370 |                                    |                           |                                |                                    | 0.858 | -1.017 | 0.341842   | 0.616313  |
| 17782 | 10507557 | <a href="#">NM_026932</a>          | <a href="#">69072</a>     | EBNA1 binding protein 2        | <a href="#">Ebna1bp2</a>           | 0.858 | -3.461 | 0.0100525  | 0.0683224 |
| 17783 | 10416411 | <a href="#">NM_016903</a>          | <a href="#">13885</a>     | esterase D/formylglutathione h | <a href="#">Esd</a>                | 0.858 | -2.967 | 0.0201916  | 0.110546  |
| 17784 | 10560624 | <a href="#">NM_009696</a>          | <a href="#">11816</a>     | apolipoprotein E               | <a href="#">ApoE</a>               | 0.858 | -2.36  | 0.0493094  | 0.199391  |
| 17785 | 10558590 | <a href="#">NM_009475</a>          | <a href="#">22264</a>     | proline-rich acidic protein 1  | <a href="#">Prap1</a>              | 0.857 | -2.113 | 0.0713235  | 0.250884  |
| 17786 | 10449712 | <a href="#">NM_144855</a>          | <a href="#">12411</a>     | cystathionine beta-synthase    | <a href="#">Cbs</a>                | 0.857 | -2.527 | 0.0384726  | 0.169578  |
| 17787 | 10450189 | <a href="#">NR_004051</a>          | <a href="#">81497</a>     | butyrophilin-like 5            | <a href="#">Btl5</a>               | 0.857 | -0.729 | 0.488864   | 0.736349  |
| 17788 | 10581737 | <a href="#">NM_172284</a>          | <a href="#">234733</a>    | DEAD (Asp-Glu-Ala-Asp) box pol | <a href="#">Ddx19b</a>             | 0.857 | -2.851 | 0.0239011  | 0.123501  |
| 17789 | 10562360 | <a href="#">NM_008155</a>          | <a href="#">14751</a>     | glucose phosphate isomerase 1  | <a href="#">Gpi1</a>               | 0.857 | -2.942 | 0.020922   | 0.113291  |
| 17790 | 10409204 | <a href="#">XM_001474265</a>       | <a href="#">100040099</a> | similar to immediate early res | <a href="#">LOC100040099</a>       | 0.857 | -1.913 | 0.0961645  | 0.301828  |
| 17791 | 10602756 | <a href="#">NM_025357</a>          | <a href="#">66106</a>     | small muscle protein, X-linked | <a href="#">Smpx</a>               | 0.857 | -2.477 | 0.041395   | 0.177544  |
| 17792 | 10488456 | <a href="#">XR_034978</a>          | <a href="#">100048737</a> | similar to protein phosphatase | <a href="#">LOC100048737</a>       | 0.857 | -1.658 | 0.140111   | 0.378727  |
| 17793 | 10357535 | <a href="#">NM_008825</a>          | <a href="#">18640</a>     | 6-phosphofructo-2-kinase/fruct | <a href="#">Pfkfb2</a>             | 0.857 | -1.227 | 0.258336   | 0.532488  |
| 17794 | 10464601 |                                    |                           |                                |                                    | 0.857 | -0.735 | 0.485628   | 0.733962  |

|       |          |                                    |                        |                                |                               |       |        |            |           |
|-------|----------|------------------------------------|------------------------|--------------------------------|-------------------------------|-------|--------|------------|-----------|
| 17795 | 10489107 | <a href="#">NM_018851</a>          | <a href="#">56045</a>  | SAM domain and HD domain, 1    | <a href="#">Samhd1</a>        | 0.857 | -2.628 | 0.0331147  | 0.15348   |
| 17796 | 10456566 | <a href="#">NM_010773</a>          | <a href="#">17191</a>  | methyl-CpG binding domain prot | <a href="#">Mbd2</a>          | 0.857 | -2.532 | 0.0381973  | 0.168893  |
| 17797 | 10355711 | <a href="#">NM_029342</a>          | <a href="#">75570</a>  | nonhomologous end-joining fact | <a href="#">Nhej1</a>         | 0.857 | -1.487 | 0.179273   | 0.434671  |
| 17798 | 10607004 | <a href="#">NM_016883</a>          | <a href="#">53380</a>  | proteasome (prosome, macropain | <a href="#">Psmc10</a>        | 0.857 | -3.596 | 0.00835228 | 0.0596624 |
| 17799 | 10510299 | <a href="#">NM_176848</a>          | <a href="#">230904</a> | F-box protein 2                | <a href="#">Fbxo2</a>         | 0.857 | -2.173 | 0.0651633  | 0.238029  |
| 17800 | 10484472 | <a href="#">NM_024230</a>          | <a href="#">68678</a>  | smoothelin-like 1              | <a href="#">Smtnl1</a>        | 0.857 | -1.552 | 0.163234   | 0.412279  |
| 17801 | 10562546 |                                    |                        |                                |                               | 0.857 | -2.517 | 0.0390391  | 0.171199  |
| 17802 | 10499696 |                                    |                        |                                |                               | 0.857 | -2.583 | 0.0353835  | 0.160238  |
| 17803 | 10482788 | <a href="#">ENSMUST00000067049</a> | <a href="#">227923</a> | RIKEN cDNA A930012O16 gene     | <a href="#">A930012O16Rik</a> | 0.857 | -1.716 | 0.128618   | 0.359531  |
| 17804 | 10588223 | <a href="#">NM_181394</a>          | <a href="#">69010</a>  | anaphase promoting complex sub | <a href="#">Anapc13</a>       | 0.857 | -3.407 | 0.0108338  | 0.0716516 |
| 17805 | 10607398 |                                    |                        |                                |                               | 0.857 | -2.276 | 0.055856   | 0.215766  |
| 17806 | 10594825 | <a href="#">NM_022026</a>          | <a href="#">64008</a>  | aquaporin 9                    | <a href="#">Aqp9</a>          | 0.857 | -1.152 | 0.286036   | 0.561602  |
| 17807 | 10394798 | <a href="#">XR_034692</a>          | <a href="#">668539</a> | similar to neural visinin-like | <a href="#">LOC668539</a>     | 0.857 | -2.33  | 0.0515974  | 0.205225  |
| 17808 | 10590212 | <a href="#">NM_028735</a>          | <a href="#">74052</a>  | tetratricopeptide repeat domai | <a href="#">Ttc21a</a>        | 0.857 | -1.927 | 0.0940494  | 0.297697  |
| 17809 | 10590968 | <a href="#">NM_019683</a>          | <a href="#">56503</a>  | ankyrin repeat domain 49       | <a href="#">Ankrd49</a>       | 0.857 | -2.772 | 0.0267899  | 0.133156  |
| 17810 | 10511498 | <a href="#">NM_175175</a>          | <a href="#">71801</a>  | pleckstrin homology domain con | <a href="#">Pleckhf2</a>      | 0.857 | -2.835 | 0.0244319  | 0.125416  |
| 17811 | 10566438 | <a href="#">BC063093</a>           | <a href="#">74349</a>  | RIKEN cDNA 4632419K20 gene     | <a href="#">4632419K20Rik</a> | 0.857 | -2.866 | 0.0233549  | 0.12142   |
| 17812 | 10589061 | <a href="#">NM_026378</a>          | <a href="#">67789</a>  | DALR anticodon binding domain  | <a href="#">Dalrd3</a>        | 0.857 | -3.692 | 0.00733313 | 0.0545572 |
| 17813 | 10604974 | <a href="#">NM_019405</a>          | <a href="#">26370</a>  | centrin 2                      | <a href="#">Cetn2</a>         | 0.857 | -1.848 | 0.105806   | 0.320603  |
| 17814 | 10525942 | <a href="#">NM_177005</a>          | <a href="#">319804</a> | glycosyltransferase 1 domain c | <a href="#">Glt1d1</a>        | 0.856 | -2.224 | 0.0604139  | 0.226689  |
| 17815 | 10607302 | <a href="#">NM_198110</a>          | <a href="#">237107</a> | guanine nucleotide binding pro | <a href="#">Gnl3l</a>         | 0.856 | -2.819 | 0.0250185  | 0.127548  |
| 17816 | 10412900 | <a href="#">NM_023526</a>          | <a href="#">69721</a>  | NFKB inhibitor interacting Ras | <a href="#">Nkiras1</a>       | 0.856 | -2.771 | 0.0268619  | 0.133357  |
| 17817 | 10597619 | <a href="#">ENSMUST00000010790</a> | <a href="#">109280</a> | RIKEN cDNA 9330176C04 gene     | <a href="#">9330176C04Rik</a> | 0.856 | -2.909 | 0.0219416  | 0.116478  |
| 17818 | 10546113 | <a href="#">NM_016906</a>          | <a href="#">53421</a>  | Sec61 alpha 1 subunit (S. cere | <a href="#">Sec61a1</a>       | 0.856 | -2.676 | 0.0308777  | 0.146582  |
| 17819 | 10380815 | <a href="#">NM_011971</a>          | <a href="#">26446</a>  | proteasome (prosome, macropain | <a href="#">Psmc3</a>         | 0.856 | -3.163 | 0.0152453  | 0.0914142 |
| 17820 | 10352558 | <a href="#">NM_033077</a>          | <a href="#">110957</a> | DNA segment, Chr 1, Pasteur In | <a href="#">D1Pas1</a>        | 0.856 | -2.353 | 0.0497958  | 0.200566  |
| 17821 | 10405927 | <a href="#">NM_001048204</a>       | <a href="#">218311</a> | zinc finger protein 455        | <a href="#">Zfp455</a>        | 0.856 | -1.044 | 0.330322   | 0.606542  |
| 17822 | 10557705 | <a href="#">NM_026888</a>          | <a href="#">68961</a>  | phosphorylase kinase, gamma 2  | <a href="#">Phkg2</a>         | 0.856 | -3.389 | 0.011097   | 0.0728453 |
| 17823 | 10406856 | <a href="#">XR_035362</a>          | <a href="#">328320</a> | gene model 807, (NCBI)         | <a href="#">Gm807</a>         | 0.856 | -1.189 | 0.271956   | 0.546343  |
| 17824 | 10422393 |                                    |                        |                                |                               | 0.856 | -1.077 | 0.31609    | 0.59306   |
| 17825 | 10565210 | <a href="#">NM_177894</a>          | <a href="#">330577</a> | RIKEN cDNA 1700129I04 gene     | <a href="#">1700129I04Rik</a> | 0.856 | -2.656 | 0.0317749  | 0.1492    |
| 17826 | 10430892 | <a href="#">BC116321</a>           | <a href="#">93882</a>  | protocadherin beta 11          | <a href="#">Pcdhb11</a>       | 0.856 | -1.714 | 0.12908    | 0.3603    |
| 17827 | 10357280 | <a href="#">NM_133748</a>          | <a href="#">72999</a>  | insulin induced gene 2         | <a href="#">Insig2</a>        | 0.856 | -3.228 | 0.0139029  | 0.0854991 |
| 17828 | 10440657 | <a href="#">NM_027105</a>          | <a href="#">69533</a>  | keratin associated protein 26- | <a href="#">Krtap26-1</a>     | 0.856 | -2.012 | 0.0829018  | 0.27574   |
| 17829 | 10599207 | <a href="#">NM_001085497</a>       | <a href="#">194744</a> | solute carrier family 25, memb | <a href="#">Slc25a43</a>      | 0.856 | -1.823 | 0.10988    | 0.327734  |
| 17830 | 10434191 | <a href="#">NM_013711</a>          | <a href="#">26462</a>  | thioredoxin reductase 2        | <a href="#">Txnrd2</a>        | 0.856 | -2.371 | 0.0485037  | 0.196834  |
| 17831 | 10468448 |                                    |                        |                                |                               | 0.856 | -1.052 | 0.326735   | 0.602834  |
| 17832 | 10377859 | <a href="#">NM_008876</a>          | <a href="#">18806</a>  | phospholipase D2               | <a href="#">Pld2</a>          | 0.856 | -2.871 | 0.0231968  | 0.120967  |
| 17833 | 10474851 | <a href="#">NM_001045523</a>       | <a href="#">228536</a> | bromo adjacent homology domain | <a href="#">Bahd1</a>         | 0.856 | -2.011 | 0.083068   | 0.276162  |
| 17834 | 10470101 | <a href="#">NM_027085</a>          | <a href="#">69454</a>  | chloride intracellular channel | <a href="#">Clc3</a>          | 0.856 | -1.72  | 0.127911   | 0.358671  |
| 17835 | 10469239 |                                    |                        |                                |                               | 0.856 | -1.339 | 0.221132   | 0.490317  |
| 17836 | 10433484 | <a href="#">AY903215</a>           | <a href="#">75329</a>  | activating transcription facto | <a href="#">Atf7ip2</a>       | 0.856 | -1.679 | 0.135692   | 0.371434  |
| 17837 | 10452639 | <a href="#">NM_023402</a>          | <a href="#">67938</a>  | myosin light chain, regulatory | <a href="#">Mylc2b</a>        | 0.856 | -2.595 | 0.034774   | 0.158373  |
| 17838 | 10461150 |                                    |                        |                                |                               | 0.856 | -1.561 | 0.161324   | 0.409487  |
| 17839 | 10376052 | <a href="#">XR_002067</a>          | <a href="#">667731</a> | similar to ribosomal protein S | <a href="#">LOC667731</a>     | 0.856 | -1.425 | 0.196047   | 0.456422  |
| 17840 | 10518781 | <a href="#">NM_011067</a>          | <a href="#">18628</a>  | period homolog 3 (Drosophila)  | <a href="#">Per3</a>          | 0.856 | -2.133 | 0.0691833  | 0.246514  |
| 17841 | 10453272 | <a href="#">NM_001001806</a>       | <a href="#">12193</a>  | zinc finger protein 36, C3H ty | <a href="#">Zfp36l2</a>       | 0.856 | -2.321 | 0.0522728  | 0.20675   |
| 17842 | 10383813 | <a href="#">NM_026443</a>          | <a href="#">67900</a>  | RIKEN cDNA 1700020C11 gene     | <a href="#">1700020C11Rik</a> | 0.856 | -2.296 | 0.0542433  | 0.211765  |
| 17843 | 10435489 | <a href="#">NM_198645</a>          | <a href="#">381045</a> | coiled-coil domain containing  | <a href="#">Cede58</a>        | 0.856 | -3.457 | 0.0101057  | 0.0685504 |
| 17844 | 10461152 | <a href="#">AK051045</a>           | <a href="#">83673</a>  | small nucleolar RNA host gene  | <a href="#">Snhg1</a>         | 0.856 | -1.945 | 0.0915805  | 0.293124  |
| 17845 | 10433433 | <a href="#">BC024814</a>           | <a href="#">239706</a> | cDNA sequence BC024814         | <a href="#">BC024814</a>      | 0.856 | -1.819 | 0.110468   | 0.328752  |
| 17846 | 10458213 | <a href="#">NM_144866</a>          | <a href="#">225363</a> | eukaryotic translation termina | <a href="#">Etf1</a>          | 0.856 | -3.055 | 0.0177996  | 0.101225  |

|       |          |                                    |                           |                                |                                    |       |        |            |           |
|-------|----------|------------------------------------|---------------------------|--------------------------------|------------------------------------|-------|--------|------------|-----------|
| 17847 | 10447480 |                                    |                           |                                |                                    | 0.856 | -2.595 | 0.0347736  | 0.158373  |
| 17848 | 10406226 | <a href="#">XM_619124</a>          | <a href="#">544954</a>    | predicted gene, EG544954       | <a href="#">EG544954</a>           | 0.856 | -1.713 | 0.129159   | 0.360384  |
| 17849 | 10408900 |                                    |                           |                                |                                    | 0.856 | -1.47  | 0.183673   | 0.440916  |
| 17850 | 10439710 | <a href="#">NM_153412</a>          | <a href="#">208177</a>    | pleckstrin homology-like domai | <a href="#">Phldb2</a>             | 0.855 | -1.989 | 0.0858297  | 0.281187  |
| 17851 | 10523277 | <a href="#">AK034152</a>           | <a href="#">319240</a>    | RIKEN cDNA 9330159N05 gene     | <a href="#">9330159N05Rik</a>      | 0.855 | -1.546 | 0.164658   | 0.414518  |
| 17852 | 10580981 | <a href="#">J02622</a>             | <a href="#">14719</a>     | glutamate oxaloacetate transam | <a href="#">Got2</a>               | 0.855 | -2.114 | 0.0711639  | 0.250614  |
| 17853 | 10579996 | <a href="#">NM_134118</a>          | <a href="#">106529</a>    | glycoprotein, synaptic 2       | <a href="#">Gpsn2</a>              | 0.855 | -3.2   | 0.0144667  | 0.0881005 |
| 17854 | 10606217 | <a href="#">NM_009592</a>          | <a href="#">11306</a>     | ATP-binding cassette, sub-fami | <a href="#">Abcb7</a>              | 0.855 | -2.151 | 0.0673817  | 0.242464  |
| 17855 | 10590004 | <a href="#">NM_018748</a>          | <a href="#">54214</a>     | golgi autoantigen, golgin subf | <a href="#">Golga4</a>             | 0.855 | -3.194 | 0.0145919  | 0.0885309 |
| 17856 | 10487748 | <a href="#">BC052447</a>           | <a href="#">228602</a>    | RIKEN cDNA 4930402H24 gene     | <a href="#">4930402H24Rik</a>      | 0.855 | -2.198 | 0.0627804  | 0.232027  |
| 17857 | 10461830 | <a href="#">NM_146344</a>          | <a href="#">258341</a>    | olfactory receptor 1495        | <a href="#">Olf1495</a>            | 0.855 | -1.723 | 0.127255   | 0.357519  |
| 17858 | 10420694 | <a href="#">NM_008715</a>          | <a href="#">18130</a>     | integrator complex subunit 6   | <a href="#">Ints6</a>              | 0.855 | -3.201 | 0.0144483  | 0.0880388 |
| 17859 | 10456018 | <a href="#">NM_001038499</a>       | <a href="#">545260</a>    | arylsulfatase i                | <a href="#">Arsi</a>               | 0.855 | -1.385 | 0.207497   | 0.471907  |
| 17860 | 10404595 | <a href="#">XM_127272</a>          | <a href="#">76487</a>     | protein phosphatase 1, regulat | <a href="#">Ppp1r3g</a>            | 0.855 | -2.432 | 0.0442685  | 0.185686  |
| 17861 | 10366595 | <a href="#">ENSMUST00000059966</a> | <a href="#">74415</a>     | RIKEN cDNA 4932442E05 gene     | <a href="#">4932442E05Rik</a>      | 0.855 | -1.327 | 0.224838   | 0.494896  |
| 17862 | 10414594 | <a href="#">NM_001029990</a>       | <a href="#">52535</a>     | methyltransferase 11 domain co | <a href="#">Mett11d1</a>           | 0.855 | -2.528 | 0.038411   | 0.169439  |
| 17863 | 10441167 | <a href="#">NM_001001492</a>       | <a href="#">385668</a>    | Leber congenital amaurosis 5-1 | <a href="#">Lca5l</a>              | 0.855 | -2.081 | 0.0747943  | 0.258759  |
| 17864 | 10408097 | <a href="#">NM_019429</a>          | <a href="#">54373</a>     | protease, serine, 16 (thymus)  | <a href="#">Prss16</a>             | 0.855 | -1.911 | 0.0963649  | 0.30213   |
| 17865 | 10571300 | <a href="#">NM_001126314</a>       | <a href="#">234155</a>    | membrane bound O-acyltransfera | <a href="#">Mboat4</a>             | 0.855 | -1.477 | 0.181993   | 0.438476  |
| 17866 | 10429220 | <a href="#">ENSMUST00000022953</a> | <a href="#">70363</a>     | RIKEN cDNA 1700010C24 gene     | <a href="#">1700010C24Rik</a>      | 0.855 | -1.123 | 0.297455   | 0.573687  |
| 17867 | 10425781 | <a href="#">NM_023475</a>          | <a href="#">68607</a>     | serine hydrolase-like          | <a href="#">Serhl</a>              | 0.855 | -3.741 | 0.006873   | 0.05179   |
| 17868 | 10439980 | <a href="#">NM_001024622</a>       | <a href="#">76302</a>     | PEST proteolytic signal contai | <a href="#">Pcnp</a>               | 0.855 | -1.82  | 0.110354   | 0.328637  |
| 17869 | 10490665 | <a href="#">NM_009133</a>          | <a href="#">20262</a>     | stathmin-like 3                | <a href="#">Stmn3</a>              | 0.855 | -1.631 | 0.145619   | 0.387145  |
| 17870 | 10427849 | <a href="#">BC119058</a>           | <a href="#">77877</a>     | RIKEN cDNA 6030458C11 gene     | <a href="#">6030458C11Rik</a>      | 0.855 | -1.594 | 0.153774   | 0.398309  |
| 17871 | 10361977 | <a href="#">NM_001101561</a>       | <a href="#">621697</a>    | predicted gene, EG621697       | <a href="#">EG621697</a>           | 0.854 | -2.479 | 0.0413291  | 0.177398  |
| 17872 | 10397277 | <a href="#">NM_028632</a>          | <a href="#">73736</a>     | FCF1 small subunit (SSU) proce | <a href="#">Fcf1</a>               | 0.854 | -2.878 | 0.0229617  | 0.120303  |
| 17873 | 10516371 | <a href="#">NM_153403</a>          | <a href="#">236511</a>    | eukaryotic translation initiat | <a href="#">Eif2c1</a>             | 0.854 | -3.877 | 0.00573461 | 0.0455152 |
| 17874 | 10455461 | <a href="#">NM_001033621</a>       | <a href="#">58916</a>     | myotilin                       | <a href="#">Myot</a>               | 0.854 | -3.339 | 0.0118976  | 0.0763471 |
| 17875 | 10489961 | <a href="#">NM_010899</a>          | <a href="#">18019</a>     | nuclear factor of activated T- | <a href="#">Nfatc2</a>             | 0.854 | -3.554 | 0.00884755 | 0.0621917 |
| 17876 | 10532339 | <a href="#">NM_008993</a>          | <a href="#">19301</a>     | peroxisomal membrane protein 2 | <a href="#">Pxm2</a>               | 0.854 | -2.986 | 0.0196363  | 0.108498  |
| 17877 | 10494781 | <a href="#">NM_207205</a>          | <a href="#">78908</a>     | immunoglobulin superfamily, me | <a href="#">Igsf3</a>              | 0.854 | -3.381 | 0.0112302  | 0.0733781 |
| 17878 | 10385599 | <a href="#">NM_007597</a>          | <a href="#">12330</a>     | calnexin                       | <a href="#">Canx</a>               | 0.854 | -3.515 | 0.00933597 | 0.0646788 |
| 17879 | 10451142 | <a href="#">DQ190000</a>           | <a href="#">653016</a>    | predicted gene, EG653016       | <a href="#">EG653016</a>           | 0.854 | -1.228 | 0.258134   | 0.532228  |
| 17880 | 10404077 | <a href="#">NM_144836</a>          | <a href="#">218103</a>    | solute carrier family 17 (sodi | <a href="#">Slc17a2</a>            | 0.854 | -2.553 | 0.0369932  | 0.165018  |
| 17881 | 10468639 | <a href="#">NM_018831</a>          | <a href="#">55947</a>     | DNA cross-link repair 1A, PSO2 | <a href="#">Dclre1a</a>            | 0.854 | -3.482 | 0.00976371 | 0.0669403 |
| 17882 | 10600810 | <a href="#">XR_002150</a>          | <a href="#">668156</a>    | predicted gene, EG668156       | <a href="#">EG668156</a>           | 0.854 | -2.324 | 0.0520553  | 0.206366  |
| 17883 | 10371111 | <a href="#">NM_013769</a>          | <a href="#">27375</a>     | tight junction protein 3       | <a href="#">Tjp3</a>               | 0.854 | -2.79  | 0.0260948  | 0.13087   |
| 17884 | 10415781 | <a href="#">BC064093</a>           | <a href="#">219144</a>    | ADP-ribosylation factor-like 1 | <a href="#">Arl11</a>              | 0.854 | -1.983 | 0.0866395  | 0.282963  |
| 17885 | 10505643 | <a href="#">BC039810</a>           | <a href="#">320226</a>    | RIKEN cDNA 4930473A06 gene     | <a href="#">4930473A06Rik</a>      | 0.854 | -1.876 | 0.101475   | 0.312131  |
| 17886 | 10597134 | <a href="#">AK134160</a>           | <a href="#">100038626</a> | predicted gene, ENSMUSG0000007 | <a href="#">ENSMUSG00000074053</a> | 0.854 | -1.786 | 0.115976   | 0.338701  |
| 17887 | 10401418 | <a href="#">AK132490</a>           | <a href="#">100038552</a> | predicted gene, ENSMUSG0000007 | <a href="#">ENSMUSG00000072948</a> | 0.854 | -2.44  | 0.0437954  | 0.1843    |
| 17888 | 10476526 | <a href="#">NM_001038641</a>       | <a href="#">74243</a>     | RIKEN cDNA 2210009G21 gene     | <a href="#">2210009G21Rik</a>      | 0.854 | -1.953 | 0.0905929  | 0.290914  |
| 17889 | 10576335 | <a href="#">NM_054046</a>          | <a href="#">23854</a>     | differentially expressed in FD | <a href="#">Def8</a>               | 0.854 | -2.747 | 0.0278176  | 0.136658  |
| 17890 | 10511175 | <a href="#">NM_025338</a>          | <a href="#">66077</a>     | aurora kinase A interacting pr | <a href="#">Aurkaip1</a>           | 0.854 | -2.66  | 0.0315941  | 0.148727  |
| 17891 | 10505587 | <a href="#">NM_144787</a>          | <a href="#">76804</a>     | jumonji domain containing 2C   | <a href="#">Jmjd2c</a>             | 0.854 | -2.348 | 0.0502196  | 0.201596  |
| 17892 | 10515427 |                                    |                           |                                |                                    | 0.854 | -0.795 | 0.451843   | 0.708709  |
| 17893 | 10411974 | <a href="#">NM_029665</a>          | <a href="#">76582</a>     | importin 11                    | <a href="#">Ipo11</a>              | 0.854 | -3.708 | 0.0071786  | 0.053634  |
| 17894 | 10514441 | <a href="#">NM_177239</a>          | <a href="#">320713</a>    | myb-like, SWIRM and MPN domain | <a href="#">Mysm1</a>              | 0.854 | -2.796 | 0.0258659  | 0.130308  |
| 17895 | 10544815 | <a href="#">NM_145567</a>          | <a href="#">58875</a>     | 3-hydroxyisobutyrate dehydroge | <a href="#">Hibadh</a>             | 0.854 | -3.04  | 0.018168   | 0.102596  |

|       |          |                                    |                           |                                |                                    |       |        |            |           |
|-------|----------|------------------------------------|---------------------------|--------------------------------|------------------------------------|-------|--------|------------|-----------|
| 17896 | 10392701 | <a href="#">NM_027216</a>          | <a href="#">69806</a>     | solute carrier family 39 (meta | <a href="#">Slc39a11</a>           | 0.854 | -1.902 | 0.097686   | 0.304546  |
| 17897 | 10356312 | <a href="#">NM_010880</a>          | <a href="#">17975</a>     | nucleolin                      | <a href="#">Ncl</a>                | 0.854 | -3.745 | 0.00683339 | 0.0515651 |
| 17898 | 10494200 | <a href="#">NM_172395</a>          | <a href="#">57912</a>     | CDC42 small effector 1         | <a href="#">Cdc42se1</a>           | 0.854 | -3.668 | 0.00758355 | 0.0559869 |
| 17899 | 10603649 |                                    |                           |                                |                                    | 0.854 | -2.022 | 0.0816678  | 0.272831  |
| 17900 | 10511580 | <a href="#">NM_001098230</a>       | <a href="#">381511</a>    | protein phosphatase 2C, magnes | <a href="#">Ppm2c</a>              | 0.854 | -2.89  | 0.0225548  | 0.11875   |
| 17901 | 10456296 | <a href="#">NM_172833</a>          | <a href="#">240354</a>    | mucosa associated lymphoid tis | <a href="#">Malt1</a>              | 0.854 | -2.915 | 0.0217726  | 0.11596   |
| 17902 | 10368730 | <a href="#">NM_023323</a>          | <a href="#">67239</a>     | brix domain containing 1       | <a href="#">Bxdc1</a>              | 0.854 | -2.728 | 0.0285833  | 0.138775  |
| 17903 | 10567072 | <a href="#">NM_011965</a>          | <a href="#">26440</a>     | proteasome (prosome, macropain | <a href="#">Psmal</a>              | 0.854 | -3.124 | 0.0161133  | 0.0949818 |
| 17904 | 10562736 | <a href="#">ENSMUST00000037220</a> | <a href="#">70004</a>     | RIKEN cDNA 1700028J19 gene     | <a href="#">1700028J19Rik</a>      | 0.854 | -1.249 | 0.250595   | 0.524406  |
| 17905 | 10518726 | <a href="#">NM_027460</a>          | <a href="#">70556</a>     | solute carrier family 25, memb | <a href="#">Slc25a33</a>           | 0.853 | -3.579 | 0.00855448 | 0.060717  |
| 17906 | 10529824 | <a href="#">NM_008935</a>          | <a href="#">19126</a>     | prominin 1                     | <a href="#">Prom1</a>              | 0.853 | -2.493 | 0.0404488  | 0.175113  |
| 17907 | 10346298 | <a href="#">NM_001039710</a>       | <a href="#">67876</a>     | coenzyme Q10 homolog B (S. cer | <a href="#">Coq10b</a>             | 0.853 | -1.236 | 0.255098   | 0.5294    |
| 17908 | 10466848 | <a href="#">NM_177474</a>          | <a href="#">52874</a>     | DNA segment, Chr 19, Brigham & | <a href="#">D19Bwg1357e</a>        | 0.853 | -2.856 | 0.0237005  | 0.122704  |
| 17909 | 10596053 | <a href="#">NM_025835</a>          | <a href="#">66904</a>     | propionyl Coenzyme A carboxyla | <a href="#">Pccb</a>               | 0.853 | -3.34  | 0.0118823  | 0.0762953 |
| 17910 | 10484561 | <a href="#">NM_001011777</a>       | <a href="#">257941</a>    | olfactory receptor 1042        | <a href="#">Olfr1042</a>           | 0.853 | -1.409 | 0.200347   | 0.462359  |
| 17911 | 10566281 | <a href="#">ENSMUST00000108195</a> | <a href="#">67713</a>     | DnaJ (Hsp40) homolog, subfamil | <a href="#">Dnajc19</a>            | 0.853 | -1.755 | 0.121482   | 0.347955  |
| 17912 | 10478326 | <a href="#">NM_013731</a>          | <a href="#">27219</a>     | serum/glucocorticoid regulated | <a href="#">Sgk2</a>               | 0.853 | -3.133 | 0.0159245  | 0.0941049 |
| 17913 | 10461652 | <a href="#">NM_008118</a>          | <a href="#">14603</a>     | gastric intrinsic factor       | <a href="#">Gif</a>                | 0.853 | -1.015 | 0.342969   | 0.617132  |
| 17914 | 10530666 | <a href="#">NM_010727</a>          | <a href="#">16924</a>     | ligand of numb-protein X 1     | <a href="#">Lnx1</a>               | 0.853 | -3.693 | 0.00732792 | 0.0545377 |
| 17915 | 10513803 |                                    |                           |                                |                                    | 0.853 | -1.268 | 0.244046   | 0.517096  |
| 17916 | 10361129 |                                    |                           |                                |                                    | 0.853 | -1.232 | 0.25648    | 0.530714  |
| 17917 | 10539927 | <a href="#">NM_001033491</a>       | <a href="#">434065</a>    | gene model 1965, (NCBI)        | <a href="#">Gm1965</a>             | 0.853 | -1.656 | 0.140354   | 0.378864  |
| 17918 | 10425632 | <a href="#">NM_010247</a>          | <a href="#">14375</a>     | X-ray repair complementing def | <a href="#">Xrcc6</a>              | 0.853 | -3.439 | 0.0103668  | 0.0698    |
| 17919 | 10435388 | <a href="#">NM_001012765</a>       | <a href="#">224129</a>    | adenylate cyclase 5            | <a href="#">Ancy5</a>              | 0.853 | -1.526 | 0.169589   | 0.420916  |
| 17920 | 10366293 | <a href="#">NM_007792</a>          | <a href="#">13008</a>     | cysteine and glycine-rich prot | <a href="#">Csrp2</a>              | 0.853 | -3.019 | 0.0187246  | 0.104989  |
| 17921 | 10371916 | <a href="#">ENSMUST00000067705</a> | <a href="#">380654</a>    | RIKEN cDNA 4930485B16 gene     | <a href="#">4930485B16Rik</a>      | 0.853 | -1.537 | 0.166863   | 0.417832  |
| 17922 | 10363241 | <a href="#">NM_027375</a>          | <a href="#">70297</a>     | GRIP and coiled-coil domain co | <a href="#">Gcc2</a>               | 0.853 | -2.58  | 0.0355378  | 0.160558  |
| 17923 | 10434226 | <a href="#">ENSMUST00000100090</a> | <a href="#">619305</a>    | RIKEN cDNA 4930588K23 gene     | <a href="#">4930588K23Rik</a>      | 0.853 | -1.116 | 0.300143   | 0.576249  |
| 17924 | 10424804 | <a href="#">NM_175399</a>          | <a href="#">109075</a>    | exosome component 4            | <a href="#">Exosc4</a>             | 0.853 | -2.683 | 0.0305429  | 0.14545   |
| 17925 | 10498992 | <a href="#">NM_011905</a>          | <a href="#">24088</a>     | toll-like receptor 2           | <a href="#">Tlr2</a>               | 0.853 | -2.74  | 0.0281063  | 0.137533  |
| 17926 | 10520965 | <a href="#">NM_009535</a>          | <a href="#">22612</a>     | Yamaguchi sarcoma viral (v-yes | <a href="#">Yes1</a>               | 0.853 | -3.09  | 0.0169163  | 0.0979671 |
| 17927 | 10605319 | <a href="#">NM_145405</a>          | <a href="#">27643</a>     | ubiquitin-like 4               | <a href="#">Ubl4</a>               | 0.853 | -3.786 | 0.00646728 | 0.0494912 |
| 17928 | 10487890 | <a href="#">BC099428</a>           | <a href="#">71995</a>     | endogenous retroviral sequence | <a href="#">Erv3</a>               | 0.853 | -1.403 | 0.202199   | 0.464958  |
| 17929 | 10596893 | <a href="#">NM_010017</a>          | <a href="#">13138</a>     | dystroglycan 1                 | <a href="#">Dag1</a>               | 0.852 | -2.224 | 0.0603808  | 0.226645  |
| 17930 | 10368197 | <a href="#">ENSMUST00000100040</a> | <a href="#">100038717</a> | predicted gene, ENSMUSG0000007 | <a href="#">ENSMUSG00000075301</a> | 0.852 | -1.476 | 0.182127   | 0.438626  |
| 17931 | 10376889 | <a href="#">NM_175002</a>          | <a href="#">216829</a>    | cDNA sequence BC025076         | <a href="#">BC025076</a>           | 0.852 | -2.626 | 0.0332203  | 0.1537    |
| 17932 | 10469984 | <a href="#">NM_146117</a>          | <a href="#">227618</a>    | leucine rich repeat containing | <a href="#">Lrrc26</a>             | 0.852 | -2.024 | 0.0813929  | 0.272349  |
| 17933 | 10446136 | <a href="#">BC116633</a>           | <a href="#">106757</a>    | transmembrane protein 146      | <a href="#">Tmem146</a>            | 0.852 | -2.001 | 0.0843163  | 0.278691  |
| 17934 | 10582074 | <a href="#">NM_026758</a>          | <a href="#">68533</a>     | M phase phosphoprotein 6       | <a href="#">Mphosph6</a>           | 0.852 | -3.582 | 0.00851606 | 0.0605052 |
| 17935 | 10432129 | <a href="#">NM_001011733</a>       | <a href="#">545140</a>    | olfactory receptor 288         | <a href="#">Olfr288</a>            | 0.852 | -1.147 | 0.28805    | 0.563886  |
| 17936 | 10360884 | <a href="#">NM_198653</a>          | <a href="#">381314</a>    | isoleucine-tRNA synthetase 2,  | <a href="#">Iars2</a>              | 0.852 | -4.23  | 0.00363696 | 0.032683  |
| 17937 | 10409152 | <a href="#">BC047205</a>           | <a href="#">68480</a>     | RIKEN cDNA 1110007C09 gene     | <a href="#">1110007C09Rik</a>      | 0.852 | -3.426 | 0.0105509  | 0.0705216 |
| 17938 | 10571920 | <a href="#">ENSMUST00000052189</a> | <a href="#">320383</a>    | RIKEN cDNA B230317F23 gene     | <a href="#">B230317F23Rik</a>      | 0.852 | -1.368 | 0.212421   | 0.477963  |
| 17939 | 10512005 | <a href="#">BC027508</a>           | <a href="#">66291</a>     | RIKEN cDNA 1810030N24 gene     | <a href="#">1810030N24Rik</a>      | 0.852 | -2.473 | 0.0416903  | 0.178117  |
| 17940 | 10435862 | <a href="#">ENSMUST00000085772</a> | <a href="#">212517</a>    | WD repeat domain 52            | <a href="#">Wdr52</a>              | 0.852 | -2.469 | 0.0419465  | 0.178958  |
| 17941 | 10607585 | <a href="#">ENSMUST00000112513</a> | <a href="#">245684</a>    | connector enhancer of kinase s | <a href="#">Cnksr2</a>             | 0.852 | -2.012 | 0.0828595  | 0.275685  |
| 17942 | 10580155 | <a href="#">BC024662</a>           | <a href="#">101966</a>    | DNA segment, Chr 8, ERATO Doi  | <a href="#">D8Erd738e</a>          | 0.852 | -3.255 | 0.0133949  | 0.0833003 |
| 17943 | 10420013 | <a href="#">NM_008736</a>          | <a href="#">18185</a>     | neural retina leucine zipper g | <a href="#">Nrl</a>                | 0.852 | -1.383 | 0.208016   | 0.472478  |
| 17944 | 10365495 | <a href="#">NM_001003910</a>       | <a href="#">103220</a>    | cDNA sequence BC030307         | <a href="#">BC030307</a>           | 0.852 | -3.325 | 0.0121434  | 0.0774775 |

| 17944 | 10605505 | <a href="#">NM_001002214</a>       | <a href="#">68524</a>  | WAS/WASL interacting protein f      | <a href="#">Wipf2</a>              | 0.852 | -1.337 | 0.221952  | 0.49161   |
|-------|----------|------------------------------------|------------------------|-------------------------------------|------------------------------------|-------|--------|-----------|-----------|
| 17946 | 10381063 | <a href="#">NM_197940</a>          | <a href="#">68524</a>  | WAS/WASL interacting protein f      | <a href="#">Wipf2</a>              | 0.852 | -1.787 | 0.115908  | 0.338549  |
| 17947 | 10402490 | <a href="#">NM_001042699</a>       | <a href="#">212073</a> | RIKEN cDNA 4831426I19 gene          | <a href="#">4831426I19Rik</a>      | 0.852 | -1.633 | 0.145231  | 0.386933  |
| 17948 | 10508645 |                                    |                        |                                     |                                    | 0.852 | -1.457 | 0.187216  | 0.445625  |
| 17949 | 10374793 | <a href="#">NM_027869</a>          | <a href="#">71701</a>  | polyribonucleotide nucleotidyl      | <a href="#">Pnpt1</a>              | 0.852 | -3.339 | 0.0118976 | 0.0763471 |
| 17950 | 10353783 | <a href="#">NM_027159</a>          | <a href="#">69668</a>  | coiled-coil domain containing       | <a href="#">Ccdc115</a>            | 0.852 | -2.862 | 0.0234919 | 0.121893  |
| 17951 | 10351825 | <a href="#">NM_178598</a>          | <a href="#">21346</a>  | transgelin 2                        | <a href="#">Tagln2</a>             | 0.852 | -2.84  | 0.0242798 | 0.124965  |
| 17952 | 10403273 | <a href="#">NM_080857</a>          | <a href="#">142688</a> | ankyrin repeat and SOCS box-co      | <a href="#">Asb13</a>              | 0.852 | -2.938 | 0.021041  | 0.11355   |
| 17953 | 10432907 | <a href="#">NM_212487</a>          | <a href="#">332131</a> | keratin 78                          | <a href="#">Krt78</a>              | 0.851 | -1.677 | 0.136263  | 0.372579  |
| 17954 | 10512766 | <a href="#">NM_029077</a>          | <a href="#">74735</a>  | tripartite motif-containing 14      | <a href="#">Trim14</a>             | 0.851 | -3.17  | 0.0151017 | 0.090765  |
| 17955 | 10398438 |                                    |                        |                                     |                                    | 0.851 | -1.378 | 0.209583  | 0.474666  |
| 17956 | 10400089 | <a href="#">NM_001033437</a>       | <a href="#">380755</a> | gene model 889, (NCBI)              | <a href="#">Gm889</a>              | 0.851 | -2.204 | 0.0621959 | 0.230633  |
| 17957 | 10601088 | <a href="#">XR_031413</a>          | <a href="#">668271</a> | similar to high-mobility group      | <a href="#">LOC668271</a>          | 0.851 | -1.195 | 0.269848  | 0.544485  |
| 17958 | 10355152 | <a href="#">NM_022721</a>          | <a href="#">14367</a>  | frizzled homolog 5 (Drosophila      | <a href="#">Fzd5</a>               | 0.851 | -2.249 | 0.0582219 | 0.22161   |
| 17959 | 10460841 | <a href="#">ENSMUST00000025681</a> | <a href="#">240505</a> | CDC42 binding protein kinase g      | <a href="#">Cdc42bpg</a>           | 0.851 | -1.833 | 0.108142  | 0.32441   |
| 17960 | 10370174 | <a href="#">NM_172550</a>          | <a href="#">216119</a> | RIKEN cDNA A13004E20 gene           | <a href="#">A13004E20Rik</a>       | 0.851 | -2.005 | 0.0838434 | 0.277518  |
| 17961 | 10507885 | <a href="#">NM_019660</a>          | <a href="#">56309</a>  | c-myc binding protein               | <a href="#">Mycbp</a>              | 0.851 | -3.378 | 0.0112729 | 0.0735307 |
| 17962 | 10595466 | <a href="#">NM_028352</a>          | <a href="#">109785</a> | phosphoglucomutase 3                | <a href="#">Pgm3</a>               | 0.851 | -2.64  | 0.032519  | 0.151516  |
| 17963 | 10378453 | <a href="#">BC072573</a>           | <a href="#">74148</a>  | RIKEN cDNA 1300001I01 gene          | <a href="#">1300001I01Rik</a>      | 0.851 | -2.347 | 0.0502659 | 0.201609  |
| 17964 | 10456723 | <a href="#">BC016084</a>           | <a href="#">407819</a> | cDNA sequence BC031181              | <a href="#">BC031181</a>           | 0.851 | -3.251 | 0.0134719 | 0.0836071 |
| 17965 | 10516277 | <a href="#">BC053421</a>           | <a href="#">66938</a>  | RIKEN cDNA 1700029G01 gene          | <a href="#">1700029G01Rik</a>      | 0.851 | -1.866 | 0.102992  | 0.315188  |
| 17966 | 10589602 | <a href="#">NM_010859</a>          | <a href="#">17897</a>  | myosin, light polypeptide 3         | <a href="#">Myl3</a>               | 0.851 | -1.917 | 0.0954776 | 0.300369  |
| 17967 | 10400740 |                                    |                        |                                     |                                    | 0.851 | -1.08  | 0.315137  | 0.592079  |
| 17968 | 10517301 | <a href="#">NM_145554</a>          | <a href="#">100017</a> | low density lipoprotein recept      | <a href="#">Ldlrap1</a>            | 0.851 | -2.486 | 0.040876  | 0.176276  |
| 17969 | 10356018 | <a href="#">ENSMUST00000116132</a> | <a href="#">620899</a> | predicted gene, EG620899            | <a href="#">EG620899</a>           | 0.851 | -1.72  | 0.12792   | 0.358671  |
| 17970 | 10357553 | <a href="#">NM_053095</a>          | <a href="#">93672</a>  | interleukin 24                      | <a href="#">Il24</a>               | 0.851 | -1.772 | 0.118351  | 0.343378  |
| 17971 | 10542953 | <a href="#">NM_009364</a>          | <a href="#">21789</a>  | tissue factor pathway inhibito      | <a href="#">Tfpi2</a>              | 0.851 | -2.109 | 0.0717515 | 0.251634  |
| 17972 | 10347968 |                                    |                        |                                     |                                    | 0.851 | -0.799 | 0.44962   | 0.70698   |
| 17973 | 10362036 | <a href="#">NM_019702</a>          | <a href="#">56422</a>  | Hbs1-like (S. cerevisiae)           | <a href="#">Hbs1l</a>              | 0.851 | -3.416 | 0.0107029 | 0.0711644 |
| 17974 | 10601867 | <a href="#">NM_177749</a>          | <a href="#">245616</a> | killer cell immunoglobulin-lik      | <a href="#">Kir3dl1</a>            | 0.851 | -2.111 | 0.0715763 | 0.251439  |
| 17975 | 10600720 | <a href="#">XR_002105</a>          | <a href="#">547215</a> | predicted gene, EG547215            | <a href="#">EG547215</a>           | 0.851 | -2.738 | 0.0281898 | 0.137705  |
| 17976 | 10359837 | <a href="#">NM_172844</a>          | <a href="#">240894</a> | flavin containing monooxygenas      | <a href="#">Fmo9</a>               | 0.851 | -0.674 | 0.521509  | 0.758794  |
| 17977 | 10399011 | <a href="#">NM_134041</a>          | <a href="#">104732</a> | RIKEN cDNA 4930427A07               | <a href="#">4930427A07Rik</a>      | 0.85  | -1.883 | 0.100476  | 0.31011   |
| 17978 | 10379998 | <a href="#">NM_197987</a>          | <a href="#">68729</a>  | gene tripartite motif-containing 37 | <a href="#">Trim37</a>             | 0.85  | -2.954 | 0.0205854 | 0.112161  |
| 17979 | 10574598 | <a href="#">BC057188</a>           | <a href="#">382053</a> | esterase 31                         | <a href="#">Es31</a>               | 0.85  | -1.313 | 0.229399  | 0.500403  |
| 17980 | 10424077 | <a href="#">BC046791</a>           | <a href="#">78581</a>  | RIKEN cDNA D530033C11 gene          | <a href="#">D530033C11Rik</a>      | 0.85  | -2.488 | 0.0407328 | 0.17591   |
| 17981 | 10573954 | <a href="#">ENSMUST00000104947</a> | <a href="#">69543</a>  | calpain, small subunit 2            | <a href="#">Capns2</a>             | 0.85  | -1.43  | 0.194592  | 0.454635  |
| 17982 | 10495528 | <a href="#">ENSMUST00000064809</a> | <a href="#">791369</a> | predicted gene, ENSMUSG0000005      | <a href="#">ENSMUSG00000052769</a> | 0.85  | -0.96  | 0.36811   | 0.639027  |
| 17983 | 10550519 | <a href="#">NM_194064</a>          | <a href="#">378430</a> | nanos homolog 2 (Drosophila)        | <a href="#">Nanos2</a>             | 0.85  | -1.682 | 0.135108  | 0.370617  |
| 17984 | 10362434 |                                    |                        |                                     |                                    | 0.85  | -1.331 | 0.223752  | 0.493792  |
| 17985 | 10502146 | <a href="#">NM_026578</a>          | <a href="#">68147</a>  | nucleolar protein family A, me      | <a href="#">Nola1</a>              | 0.85  | -2.423 | 0.0448932 | 0.187445  |
| 17986 | 10507456 | <a href="#">NM_175030</a>          | <a href="#">242646</a> | Tctex1 domain containing 4          | <a href="#">Tctex1d4</a>           | 0.85  | -1.385 | 0.207259  | 0.47167   |
| 17987 | 10419977 | <a href="#">NM_007455</a>          | <a href="#">11766</a>  | adaptor protein complex AP-1,       | <a href="#">Ap1g2</a>              | 0.85  | -2.761 | 0.0272213 | 0.134478  |
| 17988 | 10500321 | <a href="#">NM_026975</a>          | <a href="#">69168</a>  | bolA-like 1 (E. coli)               | <a href="#">Bola1</a>              | 0.85  | -2.424 | 0.0447962 | 0.187188  |
| 17989 | 10368739 | <a href="#">NM_026113</a>          | <a href="#">67371</a>  | general transcription factor I      | <a href="#">Gtf3c6</a>             | 0.85  | -2.628 | 0.0330975 | 0.153434  |
| 17990 | 10544525 | <a href="#">NM_009787</a>          | <a href="#">12304</a>  | protein disulfide isomerase as      | <a href="#">Pdia4</a>              | 0.85  | -3.876 | 0.0057439 | 0.0455547 |
| 17991 | 10502079 | <a href="#">BC039568</a>           | <a href="#">70617</a>  | RIKEN cDNA 5730508B09 gene          | <a href="#">5730508B09Rik</a>      | 0.85  | -0.839 | 0.428584  | 0.689543  |
| 17992 | 10516484 | <a href="#">NM_008126</a>          | <a href="#">14620</a>  | gap junction protein, beta 3        | <a href="#">Gjb3</a>               | 0.85  | -1.639 | 0.143962  | 0.384952  |
| 17993 | 10525887 | <a href="#">NM_029752</a>          | <a href="#">76809</a>  | Bri3 binding protein                | <a href="#">Bri3bp</a>             | 0.85  | -3.011 | 0.0189576 | 0.105763  |
| 17994 | 10509910 | <a href="#">NM_177867</a>          | <a href="#">329972</a> | spermatogenesis associated 21       | <a href="#">Spata21</a>            | 0.85  | -2.124 | 0.0701539 | 0.248254  |
| 17995 | 10556598 | <a href="#">NM_175645</a>          | <a href="#">233781</a> | xylosyltransferase 1                | <a href="#">Xylt1</a>              | 0.85  | -2.644 | 0.0323656 | 0.151101  |

|       |          |                                    |                           |                                |                                    |       |        |            |           |
|-------|----------|------------------------------------|---------------------------|--------------------------------|------------------------------------|-------|--------|------------|-----------|
| 17996 | 10438071 | <a href="#">NM_144954</a>          | <a href="#">66053</a>     | peptidylprolyl isomerase (cycl | <a href="#">Ppil2</a>              | 0.85  | -3.296 | 0.0126418  | 0.0796771 |
| 17997 | 10382360 | <a href="#">BC048942</a>           | <a href="#">276852</a>    | DNA segment, Chr 11, Wayne Sta | <a href="#">D11Wsu47e</a>          | 0.85  | -2.155 | 0.0670051  | 0.241742  |
| 17998 | 10403348 | <a href="#">ENSMUST00000065956</a> | <a href="#">432723</a>    | predicted gene, EG432723       | <a href="#">EG432723</a>           | 0.85  | -2.087 | 0.0741862  | 0.257526  |
| 17999 | 10546661 | <a href="#">NM_053202</a>          | <a href="#">108655</a>    | forkhead box P1                | <a href="#">Foxp1</a>              | 0.85  | -2.31  | 0.0531209  | 0.209043  |
| 18000 | 10392970 | <a href="#">NM_027162</a>          | <a href="#">69674</a>     | MIF4G domain containing        | <a href="#">Mif4gd</a>             | 0.85  | -2.224 | 0.0603631  | 0.226645  |
| 18001 | 10499504 | <a href="#">NM_013604</a>          | <a href="#">17827</a>     | metaxin 1                      | <a href="#">Mtx1</a>               | 0.85  | -1.735 | 0.12508    | 0.35409   |
| 18002 | 10388520 | <a href="#">NM_026029</a>          | <a href="#">67201</a>     | glyoxalase domain containing 4 | <a href="#">Glod4</a>              | 0.85  | -2.394 | 0.0468624  | 0.192371  |
| 18003 | 10597878 | <a href="#">NM_153540</a>          | <a href="#">215494</a>    | expressed sequence C85492      | <a href="#">C85492</a>             | 0.85  | -2.97  | 0.020099   | 0.110172  |
| 18004 | 10348378 | <a href="#">NM_134252</a>          | <a href="#">171382</a>    | transient receptor potential c | <a href="#">Trpm8</a>              | 0.85  | -1.069 | 0.319629   | 0.596543  |
| 18005 | 10430458 | <a href="#">BC023356</a>           | <a href="#">20665</a>     | SRY-box containing gene 10     | <a href="#">Sox10</a>              | 0.85  | -2.147 | 0.0678141  | 0.243316  |
| 18006 | 10597511 | <a href="#">ENSMUST00000075898</a> | <a href="#">546164</a>    | predicted gene, EG546164       | <a href="#">EG546164</a>           | 0.85  | -2.17  | 0.0654771  | 0.238533  |
| 18007 | 10593356 | <a href="#">NM_025848</a>          | <a href="#">66925</a>     | succinate dehydrogenase comple | <a href="#">Sdhb</a>               | 0.85  | -3.337 | 0.0119338  | 0.0765328 |
| 18008 | 10408850 | <a href="#">NM_001111324</a>       | <a href="#">18003</a>     | neural precursor cell expresse | <a href="#">Nedd9</a>              | 0.85  | -1.957 | 0.0900625  | 0.289577  |
| 18009 | 10442219 | <a href="#">NM_144515</a>          | <a href="#">22710</a>     | zinc finger protein 52         | <a href="#">Zfp52</a>              | 0.85  | -2.845 | 0.0240993  | 0.124223  |
| 18010 | 10524077 |                                    |                           |                                |                                    | 0.85  | -1.162 | 0.282363   | 0.557354  |
| 18011 | 10446235 | <a href="#">NM_134125</a>          | <a href="#">106628</a>    | thyroid hormone receptor inter | <a href="#">Trip10</a>             | 0.849 | -3.111 | 0.0164288  | 0.0962129 |
| 18012 | 10514323 | <a href="#">AK144774</a>           | <a href="#">100037413</a> | predicted gene, ENSMUSG0000007 | <a href="#">ENSMUSG00000073810</a> | 0.849 | -1.163 | 0.281905   | 0.557053  |
| 18013 | 10604242 | <a href="#">XR_032497</a>          | <a href="#">385344</a>    | similar to 3-phosphoglycerate  | <a href="#">LOC385344</a>          | 0.849 | -1.657 | 0.140211   | 0.378815  |
| 18014 | 10565132 | <a href="#">ENSMUST00000073406</a> | <a href="#">210321</a>    | cDNA sequence BC048679         | <a href="#">BC048679</a>           | 0.849 | -2.436 | 0.0440101  | 0.184853  |
| 18015 | 10568785 | <a href="#">NM_009760</a>          | <a href="#">12176</a>     | BCL2/adenovirus E1B interactin | <a href="#">Bnip3</a>              | 0.849 | -2.408 | 0.0459101  | 0.189928  |
| 18016 | 10477001 | <a href="#">XM_983502</a>          | <a href="#">675602</a>    | similar to Glyceraldehyde-3-ph | <a href="#">LOC675602</a>          | 0.849 | -0.883 | 0.40558    | 0.670072  |
| 18017 | 10363622 | <a href="#">NM_026085</a>          | <a href="#">67307</a>     | RIKEN cDNA 3110049J23 gene     | <a href="#">3110049J23Rik</a>      | 0.849 | -1.963 | 0.0891729  | 0.287902  |
| 18018 | 10348889 | <a href="#">NM_178882</a>          | <a href="#">98314</a>     | D-2-hydroxyglutarate dehydroge | <a href="#">D2hgdh</a>             | 0.849 | -3.028 | 0.018488   | 0.104021  |
| 18019 | 10558914 | <a href="#">AK012402</a>           | <a href="#">67186</a>     | ribosomal protein, large P2    | <a href="#">Rplp2</a>              | 0.849 | -2.513 | 0.0392748  | 0.171931  |
| 18020 | 10489701 | <a href="#">BC020160</a>           | <a href="#">74614</a>     | RIKEN cDNA 4833422F24 gene     | <a href="#">4833422F24Rik</a>      | 0.849 | -1.861 | 0.103788   | 0.316741  |
| 18021 | 10583806 | <a href="#">XR_001828</a>          | <a href="#">625409</a>    | predicted gene, EG625409       | <a href="#">EG625409</a>           | 0.849 | -2.559 | 0.0367009  | 0.163921  |
| 18022 | 10604290 | <a href="#">XM_987385</a>          | <a href="#">333830</a>    | predicted gene, EG333830       | <a href="#">EG333830</a>           | 0.849 | -2.347 | 0.0502995  | 0.201617  |
| 18023 | 10533131 | <a href="#">NM_023625</a>          | <a href="#">71772</a>     | RIKEN cDNA 1300012G16 gene     | <a href="#">1300012G16Rik</a>      | 0.849 | -2.866 | 0.0233718  | 0.121478  |
| 18024 | 10580519 |                                    |                           |                                |                                    | 0.849 | -1.579 | 0.157013   | 0.403436  |
| 18025 | 10481496 | <a href="#">ENSMUST00000100212</a> | <a href="#">100038700</a> | predicted gene, OTTMUSG0000001 | <a href="#">OTTMUSG00000016805</a> | 0.849 | -1.443 | 0.191133   | 0.450298  |
| 18026 | 10373143 | <a href="#">NM_033072</a>          | <a href="#">110962</a>    | methyl-CpG binding domain prot | <a href="#">Mbd6</a>               | 0.849 | -2.421 | 0.0450324  | 0.187748  |
| 18027 | 10398400 |                                    |                           |                                |                                    | 0.849 | -1.472 | 0.183244   | 0.440236  |
| 18028 | 10539907 | <a href="#">NM_011906</a>          | <a href="#">24100</a>     | G protein-coupled receptor 175 | <a href="#">Gpr175</a>             | 0.849 | -2.044 | 0.0790184  | 0.267708  |
| 18029 | 10384691 | <a href="#">NM_027860</a>          | <a href="#">71675</a>     | RIKEN cDNA 0610010F05 gene     | <a href="#">0610010F05Rik</a>      | 0.849 | -1.922 | 0.0948569  | 0.299396  |
| 18030 | 10589909 | <a href="#">AK048065</a>           | <a href="#">791362</a>    | predicted gene, ENSMUSG0000005 | <a href="#">ENSMUSG00000052207</a> | 0.849 | -0.723 | 0.492323   | 0.738379  |
| 18031 | 10479379 | <a href="#">NM_148933</a>          | <a href="#">108115</a>    | solute carrier organic anion t | <a href="#">Slco4a1</a>            | 0.849 | -2.088 | 0.0740038  | 0.257104  |
| 18032 | 10483150 | <a href="#">NM_021716</a>          | <a href="#">60344</a>     | fidgetin                       | <a href="#">Fign</a>               | 0.849 | -1.985 | 0.0862797  | 0.282193  |
| 18033 | 10594381 | <a href="#">ENSMUST00000042322</a> | <a href="#">78250</a>     | IQ motif containing H          | <a href="#">Iqch</a>               | 0.849 | -1.736 | 0.124897   | 0.353808  |
| 18034 | 10366796 | <a href="#">NM_010792</a>          | <a href="#">17299</a>     | methyltransferase-like 1       | <a href="#">Mettl1</a>             | 0.849 | -2.63  | 0.033023   | 0.153257  |
| 18035 | 10355668 |                                    |                           |                                |                                    | 0.849 | -1.42  | 0.197356   | 0.457905  |
| 18036 | 10576027 | <a href="#">ENSMUST00000098354</a> | <a href="#">100038388</a> | predicted gene, ENSMUSG0000007 | <a href="#">ENSMUSG00000074055</a> | 0.849 | -1.54  | 0.166264   | 0.417121  |
| 18037 | 10478048 | <a href="#">NM_008489</a>          | <a href="#">16803</a>     | lipopolysaccharide binding pro | <a href="#">Lbp</a>                | 0.849 | -1.628 | 0.146192   | 0.387985  |
| 18038 | 10533120 |                                    |                           |                                |                                    | 0.849 | -1.566 | 0.16015    | 0.407486  |
| 18039 | 10360648 | <a href="#">NM_011183</a>          | <a href="#">19165</a>     | presenilin 2                   | <a href="#">Psen2</a>              | 0.848 | -2.356 | 0.0495993  | 0.200156  |
| 18040 | 10595288 | <a href="#">NM_133718</a>          | <a href="#">69981</a>     | transmembrane protein 30A      | <a href="#">Tmem30a</a>            | 0.848 | -4.021 | 0.00474894 | 0.0397482 |
| 18041 | 10523012 | <a href="#">NM_007832</a>          | <a href="#">13178</a>     | deoxycytidine kinase           | <a href="#">Dck</a>                | 0.848 | -3.04  | 0.0181723  | 0.102596  |
| 18042 | 10382838 | <a href="#">BC055707</a>           | <a href="#">66293</a>     | RIKEN cDNA 1810032O08 gene     | <a href="#">1810032O08Rik</a>      | 0.848 | -1.663 | 0.139051   | 0.377128  |
| 18043 | 10408346 | <a href="#">ENSMUST00000069594</a> | <a href="#">100036543</a> | predicted gene, ENSMUSG0000005 | <a href="#">ENSMUSG00000055849</a> | 0.848 | -3.803 | 0.00632923 | 0.0488235 |
| 18044 | 10480751 | <a href="#">NM_027062</a>          | <a href="#">69379</a>     | complement component 8, gamma  | <a href="#">C8g</a>                | 0.848 | -1.88  | 0.100921   | 0.310968  |
| 18045 | 10450242 | <a href="#">NM_009780</a>          | <a href="#">12268</a>     | complement component 4B        | <a href="#">C4b</a>                | 0.848 | -1.324 | 0.226038   | 0.496626  |

|       |          |                                    |                           | (Child                                             |                                    |       |        |            |           |
|-------|----------|------------------------------------|---------------------------|----------------------------------------------------|------------------------------------|-------|--------|------------|-----------|
| 18046 | 10547830 | <a href="#">NM_009415</a>          | <a href="#">21991</a>     | triosephosphate isomerase 1                        | <a href="#">Tpi1</a>               | 0.848 | -2.292 | 0.0546093  | 0.21288   |
| 18047 | 10541063 | <a href="#">NM_001011800</a>       | <a href="#">258019</a>    | olfactory receptor 212                             | <a href="#">Olfir212</a>           | 0.848 | -1.371 | 0.21141    | 0.476907  |
| 18048 | 10578219 | <a href="#">ENSMUST00000065297</a> | <a href="#">244421</a>    | LON peptidase N-terminal domain                    | <a href="#">Lonrf1</a>             | 0.848 | -1.951 | 0.090828   | 0.291466  |
| 18049 | 10551881 |                                    |                           |                                                    |                                    | 0.848 | -3.146 | 0.0156342  | 0.0928584 |
| 18050 | 10368090 | <a href="#">XR_032028</a>          | <a href="#">667036</a>    | predicted gene, EG667036                           | <a href="#">EG667036</a>           | 0.848 | -1.269 | 0.243882   | 0.516956  |
| 18051 | 10515007 | <a href="#">NM_024198</a>          | <a href="#">67305</a>     | glutathione peroxidase 7                           | <a href="#">Gpx7</a>               | 0.848 | -3.686 | 0.00739657 | 0.0548555 |
| 18052 | 10583788 | <a href="#">NM_008925</a>          | <a href="#">19089</a>     | protein kinase C substrate 80K                     | <a href="#">Prkesh</a>             | 0.848 | -3.117 | 0.0162802  | 0.0956368 |
| 18053 | 10587639 | <a href="#">NM_011851</a>          | <a href="#">23959</a>     | 5' nucleotidase, ecto                              | <a href="#">Nt5e</a>               | 0.848 | -2.448 | 0.0432165  | 0.182644  |
| 18054 | 10586454 | <a href="#">AK050877</a>           | <a href="#">319910</a>    | RIKEN cDNA D030028M11 gene                         | <a href="#">D030028M11Rik</a>      | 0.848 | -0.857 | 0.419143   | 0.681475  |
| 18055 | 10415835 | <a href="#">NM_001039121</a>       | <a href="#">654458</a>    | defensin beta 43                                   | <a href="#">Defb43</a>             | 0.848 | -1.774 | 0.118092   | 0.343079  |
| 18056 | 10368486 | <a href="#">NM_001110197</a>       | <a href="#">68031</a>     | ring finger protein 146                            | <a href="#">Rnf146</a>             | 0.848 | -2.241 | 0.0589022  | 0.223325  |
| 18057 | 10512145 | <a href="#">NM_007473</a>          | <a href="#">11832</a>     | aquaporin 7                                        | <a href="#">Aqp7</a>               | 0.848 | -1.759 | 0.12067    | 0.347112  |
| 18058 | 10417704 | <a href="#">NM_146052</a>          | <a href="#">218763</a>    | leucine rich repeat containing                     | <a href="#">Lrrc3b</a>             | 0.848 | -2.473 | 0.0416885  | 0.178117  |
| 18059 | 10355312 | <a href="#">NM_011770</a>          | <a href="#">22779</a>     | IKAROS family zinc finger 2                        | <a href="#">Ikzf2</a>              | 0.848 | -2.565 | 0.0363411  | 0.16283   |
| 18060 | 10348420 |                                    |                           |                                                    |                                    | 0.848 | -1.376 | 0.209885   | 0.475038  |
| 18061 | 10568521 | <a href="#">BC044749</a>           | <a href="#">68277</a>     | RIKEN cDNA 2310057M21 gene                         | <a href="#">2310057M21Rik</a>      | 0.848 | -1.84  | 0.107062   | 0.322599  |
| 18062 | 10470775 | <a href="#">NM_207298</a>          | <a href="#">99151</a>     | cerebral endothelial cell adhe                     | <a href="#">Cercam</a>             | 0.848 | -2.553 | 0.0370122  | 0.16504   |
| 18063 | 10382973 | <a href="#">ENSMUST00000106331</a> | <a href="#">77727</a>     | RIKEN cDNA 6030468B19 gene                         | <a href="#">6030468B19Rik</a>      | 0.848 | -1.575 | 0.158044   | 0.405065  |
| 18064 | 10376208 | <a href="#">NM_010299</a>          | <a href="#">14667</a>     | GM2 ganglioside activator prot                     | <a href="#">Gm2a</a>               | 0.847 | -2.743 | 0.027967   | 0.1372    |
| 18065 | 10384961 | <a href="#">NM_011491</a>          | <a href="#">20856</a>     | stanniocalcin 2                                    | <a href="#">Stc2</a>               | 0.847 | -1.83  | 0.108663   | 0.325457  |
| 18066 | 10401667 | <a href="#">BC004591</a>           | <a href="#">58520</a>     | RIKEN cDNA 0610007P14 gene                         | <a href="#">0610007P14Rik</a>      | 0.847 | -3.302 | 0.0125354  | 0.0792136 |
| 18067 | 10463254 | <a href="#">NM_177464</a>          | <a href="#">52013</a>     | DNA segment, Chr 19, ERATO Doi                     | <a href="#">D19Erdt386e</a>        | 0.847 | -3.191 | 0.0146593  | 0.0887615 |
| 18068 | 10508436 | <a href="#">NM_023485</a>          | <a href="#">68828</a>     | syncoilin                                          | <a href="#">Sync</a>               | 0.847 | -2.044 | 0.0790727  | 0.267794  |
| 18069 | 10386758 | <a href="#">NM_001033227</a>       | <a href="#">109342</a>    | solute carrier family 5 (sodium)                   | <a href="#">Slc5a10</a>            | 0.847 | -1.793 | 0.114755   | 0.336905  |
| 18070 | 10375893 | <a href="#">NM_025535</a>          | <a href="#">66397</a>     | SAR1 gene homolog B (S. cerevisiae)                | <a href="#">Sar1b</a>              | 0.847 | -3.946 | 0.0052385  | 0.0426339 |
| 18071 | 10447224 | <a href="#">NM_172256</a>          | <a href="#">213575</a>    | dynein cytoplasmic 2 light intermediate chain      | <a href="#">Dync2li1</a>           | 0.847 | -3.153 | 0.0154649  | 0.09237   |
| 18072 | 10464167 | <a href="#">NM_007419</a>          | <a href="#">11554</a>     | adrenergic receptor, beta 1                        | <a href="#">Adrb1</a>              | 0.847 | -1.599 | 0.152517   | 0.396392  |
| 18073 | 10349826 | <a href="#">ENSMUST00000097577</a> | <a href="#">100038653</a> | predicted gene, ENSMUSG0000007                     | <a href="#">ENSMUSG00000073566</a> | 0.847 | -1.18  | 0.275586   | 0.550454  |
| 18074 | 10408042 | <a href="#">ENSMUST00000076238</a> | <a href="#">791358</a>    | predicted gene, ENSMUSG0000005                     | <a href="#">ENSMUSG00000059459</a> | 0.847 | -1.697 | 0.132229   | 0.365389  |
| 18075 | 10583432 |                                    |                           |                                                    |                                    | 0.847 | -1.441 | 0.191686   | 0.451028  |
| 18076 | 10504499 | <a href="#">NM_138590</a>          | <a href="#">319885</a>    | zinc finger, CCHC domain containing                | <a href="#">Zcche7</a>             | 0.847 | -2.418 | 0.0452323  | 0.188044  |
| 18077 | 10552348 |                                    |                           |                                                    |                                    | 0.847 | -1.698 | 0.132084   | 0.365262  |
| 18078 | 10361887 | <a href="#">NM_022032</a>          | <a href="#">64058</a>     | PERP, TP53 apoptosis effector                      | <a href="#">Perp</a>               | 0.847 | -2.42  | 0.0450549  | 0.187761  |
| 18079 | 10507011 | <a href="#">NM_172296</a>          | <a href="#">242620</a>    | doublesex and mab-3 related transcription factor 2 | <a href="#">Dmrt2</a>              | 0.847 | -2.678 | 0.0307523  | 0.14602   |
| 18080 | 10421615 | <a href="#">NM_026457</a>          | <a href="#">67926</a>     | spermatid associated                               | <a href="#">Spert</a>              | 0.847 | -1.926 | 0.0942087  | 0.29789   |
| 18081 | 10523513 | <a href="#">ENSMUST00000031274</a> | <a href="#">75094</a>     | RIKEN cDNA 4930522N08 gene                         | <a href="#">4930522N08Rik</a>      | 0.847 | -1.765 | 0.119736   | 0.346027  |
| 18082 | 10508819 | <a href="#">NM_027152</a>          | <a href="#">69655</a>     | CD164 sialomucin-like 2                            | <a href="#">Cd164l2</a>            | 0.847 | -1.437 | 0.192773   | 0.452235  |
| 18083 | 10553913 | <a href="#">NM_028626</a>          | <a href="#">73724</a>     | methylmalonyl CoA epimerase                        | <a href="#">Mcee</a>               | 0.847 | -2.402 | 0.0463348  | 0.191236  |
| 18084 | 10598027 |                                    |                           |                                                    |                                    | 0.847 | -2.485 | 0.0409404  | 0.176338  |
| 18085 | 10373692 | <a href="#">NM_001103366</a>       | <a href="#">625131</a>    | vomerol nasal 2, receptor 87                       | <a href="#">Vmn2r87</a>            | 0.847 | -0.99  | 0.35424    | 0.626867  |
| 18086 | 10507099 | <a href="#">NM_001085549</a>       | <a href="#">666048</a>    | predicted gene, OTTMUSG0000000                     | <a href="#">OTTMUSG00000008561</a> | 0.847 | -1.626 | 0.146672   | 0.388673  |
| 18087 | 10350489 | <a href="#">NM_019562</a>          | <a href="#">56207</a>     | ubiquitin carboxyl-terminal esterase               | <a href="#">Uchl5</a>              | 0.847 | -3.263 | 0.0132456  | 0.082664  |
| 18088 | 10453867 | <a href="#">NM_001081223</a>       | <a href="#">225182</a>    | retinoblastoma binding protein                     | <a href="#">Rbbp8</a>              | 0.847 | -3.666 | 0.00759509 | 0.056033  |
| 18089 | 10348713 | <a href="#">XM_001474855</a>       | <a href="#">381284</a>    | RIKEN cDNA E030010N08 gene                         | <a href="#">E030010N08Rik</a>      | 0.847 | -2.098 | 0.0728722  | 0.254427  |
| 18090 | 10487359 | <a href="#">BC130218</a>           | <a href="#">73338</a>     | RIKEN cDNA 1700041B20 gene                         | <a href="#">1700041B20Rik</a>      | 0.847 | -3.102 | 0.0166457  | 0.0970498 |
| 18091 | 10569203 | <a href="#">NM_026522</a>          | <a href="#">68038</a>     | chitinase domain containing 1                      | <a href="#">Chid1</a>              | 0.847 | -3.221 | 0.0140535  | 0.0860798 |
| 18092 | 10446693 | <a href="#">ENSMUST00000047086</a> | <a href="#">72515</a>     | WD repeat domain 43                                | <a href="#">Wdr43</a>              | 0.847 | -3.844 | 0.00599366 | 0.0469175 |
| 18093 | 10508100 | <a href="#">NM_001035526</a>       | <a href="#">100317</a>    | expressed sequence AT1040320                       | <a href="#">AT1040320</a>          | 0.847 | -2.475 | 0.0415608  | 0.177907  |

|       |          |                                    |                        |                                |                               |       |        |            |           |
|-------|----------|------------------------------------|------------------------|--------------------------------|-------------------------------|-------|--------|------------|-----------|
| 18075 | 10506120 | <a href="#">NM_001035320</a>       | <a href="#">100317</a> | expressed sequence AU040320    | <a href="#">AU040320</a>      | 0.847 | -2.773 | 0.0413008  | 0.117707  |
| 18094 | 10526726 | <a href="#">NM_133906</a>          | <a href="#">74570</a>  | zinc finger with KRAB and SCAN | <a href="#">Zkscan1</a>       | 0.847 | -2.827 | 0.0247177  | 0.126484  |
| 18095 | 10599427 |                                    |                        |                                |                               | 0.847 | -1.384 | 0.207746   | 0.472219  |
| 18096 | 10582152 | <a href="#">BC030874</a>           | <a href="#">74347</a>  | RIKEN cDNA 4632415K11 gene     | <a href="#">4632415K11Rik</a> | 0.847 | -1.995 | 0.085042   | 0.280082  |
| 18097 | 10540533 | <a href="#">NM_007617</a>          | <a href="#">12391</a>  | caveolin 3                     | <a href="#">Cav3</a>          | 0.847 | -2.089 | 0.0738982  | 0.256909  |
| 18098 | 10545513 |                                    |                        |                                |                               | 0.847 | -0.972 | 0.362462   | 0.633904  |
| 18099 | 10572038 | <a href="#">NM_028427</a>          | <a href="#">73067</a>  | transmembrane protein 192      | <a href="#">Tmem192</a>       | 0.847 | -2.682 | 0.0305951  | 0.145633  |
| 18100 | 10491319 | <a href="#">NM_028231</a>          | <a href="#">72413</a>  | potassium large conductance ca | <a href="#">Kenmb2</a>        | 0.847 | -3.152 | 0.015492   | 0.0924277 |
| 18101 | 10400315 |                                    |                        |                                |                               | 0.847 | -1.904 | 0.0974432  | 0.304154  |
| 18102 | 10510256 | <a href="#">BC012878</a>           | <a href="#">77034</a>  | RIKEN cDNA 2510039O18 gene     | <a href="#">2510039O18Rik</a> | 0.847 | -2.77  | 0.02689    | 0.133446  |
| 18103 | 10429772 | <a href="#">NM_144848</a>          | <a href="#">223650</a> | epiplakin 1                    | <a href="#">Eppk1</a>         | 0.846 | -2.167 | 0.0657932  | 0.239149  |
| 18104 | 10473641 | <a href="#">NM_146343</a>          | <a href="#">258340</a> | olfactory receptor 1265        | <a href="#">Olfr1265</a>      | 0.846 | -1.346 | 0.21903    | 0.487441  |
| 18105 | 10545930 |                                    |                        |                                |                               | 0.846 | -2.3   | 0.0539111  | 0.210728  |
| 18106 | 10370632 | <a href="#">NM_144528</a>          | <a href="#">70294</a>  | ring finger protein 126        | <a href="#">Rnf126</a>        | 0.846 | -2.459 | 0.0425435  | 0.18074   |
| 18107 | 10582262 | <a href="#">NM_145605</a>          | <a href="#">234825</a> | kelch domain containing 4      | <a href="#">Klhdc4</a>        | 0.846 | -3.032 | 0.0183927  | 0.103567  |
| 18108 | 10557060 | <a href="#">ENSMUST00000033166</a> | <a href="#">74466</a>  | RIKEN cDNA 4933427G17 gene     | <a href="#">4933427G17Rik</a> | 0.846 | -1.481 | 0.181014   | 0.436926  |
| 18109 | 10395855 | <a href="#">BC110357</a>           | <a href="#">328099</a> | expressed sequence AU021838    | <a href="#">AU021838</a>      | 0.846 | -4.391 | 0.00297034 | 0.0285477 |
| 18110 | 10500011 | <a href="#">NM_011656</a>          | <a href="#">22156</a>  | tuftelin 1                     | <a href="#">Tuft1</a>         | 0.846 | -2.628 | 0.0331368  | 0.153511  |
| 18111 | 10458823 |                                    |                        |                                |                               | 0.846 | -3.691 | 0.00735041 | 0.0545959 |
| 18112 | 10404033 | <a href="#">NM_145713</a>          | <a href="#">14957</a>  | histone cluster 1, H1d         | <a href="#">Hist1h1d</a>      | 0.846 | -2.776 | 0.0266586  | 0.132753  |
| 18113 | 10495530 | <a href="#">NM_027193</a>          | <a href="#">69740</a>  | DPH5 homolog (S. cerevisiae)   | <a href="#">Dph5</a>          | 0.846 | -2.561 | 0.0365828  | 0.163532  |
| 18114 | 10492291 | <a href="#">ENSMUST00000094227</a> | <a href="#">229333</a> | RIKEN cDNA C130079G13 gene     | <a href="#">C130079G13Rik</a> | 0.846 | -1.306 | 0.23178    | 0.502487  |
| 18115 | 10388174 | <a href="#">NM_011569</a>          | <a href="#">21689</a>  | tektin 1                       | <a href="#">Tekt1</a>         | 0.846 | -2.289 | 0.0548255  | 0.213486  |
| 18116 | 10595529 | <a href="#">NM_199316</a>          | <a href="#">382090</a> | RIKEN cDNA 4922501C03 gene     | <a href="#">4922501C03Rik</a> | 0.846 | -2.927 | 0.0213813  | 0.114508  |
| 18117 | 10576417 | <a href="#">NM_139272</a>          | <a href="#">108148</a> | UDP-N-acetyl-alpha-D-galactosa | <a href="#">Galnt2</a>        | 0.846 | -2.262 | 0.0570515  | 0.218414  |
| 18118 | 10517682 | <a href="#">BC055791</a>           | <a href="#">433771</a> | RIKEN cDNA 2310028O11 gene     | <a href="#">2310028O11Rik</a> | 0.846 | -2.285 | 0.0551052  | 0.214181  |
| 18119 | 10483548 | <a href="#">NM_029280</a>          | <a href="#">75422</a>  | methyltransferase like 5       | <a href="#">Mettl5</a>        | 0.846 | -2.177 | 0.0647902  | 0.237175  |
| 18120 | 10508477 |                                    |                        |                                |                               | 0.846 | -1.001 | 0.348996   | 0.622715  |
| 18121 | 10450444 | <a href="#">NM_018816</a>          | <a href="#">55938</a>  | apolipoprotein M               | <a href="#">Apom</a>          | 0.846 | -1.299 | 0.233961   | 0.505288  |
| 18122 | 10363403 | <a href="#">NM_026937</a>          | <a href="#">69090</a>  | activating signal cointegrator | <a href="#">Asce1</a>         | 0.846 | -3.299 | 0.0125834  | 0.0794934 |
| 18123 | 10419399 | <a href="#">NM_029238</a>          | <a href="#">75288</a>  | solute carrier family 35, memb | <a href="#">Slc35f4</a>       | 0.846 | -3.014 | 0.0188586  | 0.105433  |
| 18124 | 10567504 | <a href="#">XM_355934</a>          | <a href="#">381917</a> | dynein, axonemal, heavy chain  | <a href="#">Dnahe3</a>        | 0.846 | -2.895 | 0.0224115  | 0.118094  |
| 18125 | 10516064 | <a href="#">NM_029662</a>          | <a href="#">76574</a>  | major facilitator superfamily  | <a href="#">Mfsd2</a>         | 0.846 | -1.386 | 0.207211   | 0.471647  |
| 18126 | 10534501 |                                    |                        |                                |                               | 0.846 | -3.096 | 0.0167699  | 0.0975469 |
| 18127 | 10590892 | <a href="#">NM_026665</a>          | <a href="#">74360</a>  | centrosomal protein 57         | <a href="#">Cep57</a>         | 0.846 | -3.859 | 0.0058712  | 0.0462693 |
| 18128 | 10371107 | <a href="#">NM_025317</a>          | <a href="#">66047</a>  | mitochondrial ribosomal protei | <a href="#">Mrpl54</a>        | 0.846 | -2.413 | 0.0455863  | 0.188847  |
| 18129 | 10548810 | <a href="#">BC099944</a>           | <a href="#">243676</a> | RIKEN cDNA E330021D16 gene     | <a href="#">E330021D16Rik</a> | 0.846 | -1.54  | 0.16615    | 0.417017  |
| 18130 | 10346634 | <a href="#">NM_018868</a>          | <a href="#">55989</a>  | nucleolar protein 5            | <a href="#">Nol5</a>          | 0.846 | -3.281 | 0.0129171  | 0.0811163 |
| 18131 | 10347741 | <a href="#">NM_026713</a>          | <a href="#">68393</a>  | monoacylglycerol O-acyltransfe | <a href="#">Mogat1</a>        | 0.846 | -1.496 | 0.176987   | 0.43128   |
| 18132 | 10381345 | <a href="#">NM_011192</a>          | <a href="#">19192</a>  | proteasome (prosome, macropai  | <a href="#">Psme3</a>         | 0.846 | -3.633 | 0.00794892 | 0.057744  |
| 18133 | 10424430 | <a href="#">AK016931</a>           | <a href="#">74460</a>  | RIKEN cDNA 4933426G20 gene     | <a href="#">4933426G20Rik</a> | 0.846 | -2.27  | 0.0563538  | 0.217     |
| 18134 | 10461115 | <a href="#">NM_031194</a>          | <a href="#">19879</a>  | solute carrier family 22 (orga | <a href="#">Slc22a8</a>       | 0.846 | -1.674 | 0.136702   | 0.373246  |
| 18135 | 10452508 | <a href="#">NM_023053</a>          | <a href="#">65960</a>  | twisted gastrulation homolog 1 | <a href="#">Twsg1</a>         | 0.846 | -2.67  | 0.0311459  | 0.147425  |
| 18136 | 10416393 | <a href="#">XR_034309</a>          | <a href="#">629583</a> | similar to Nuclear autoantigen | <a href="#">LOC629583</a>     | 0.846 | -1.463 | 0.185667   | 0.443587  |
| 18137 | 10506843 | <a href="#">NM_177045</a>          | <a href="#">319965</a> | coiled-coil and C2 domain cont | <a href="#">Ce2d1b</a>        | 0.846 | -3.297 | 0.0126338  | 0.0796771 |
| 18138 | 10507961 | <a href="#">NM_008636</a>          | <a href="#">17764</a>  | metal response element binding | <a href="#">Mtf1</a>          | 0.845 | -2.897 | 0.0223291  | 0.117825  |
| 18139 | 10344973 | <a href="#">NM_010267</a>          | <a href="#">14545</a>  | ganglioside-induced differenti | <a href="#">Gdap1</a>         | 0.845 | -1.734 | 0.125302   | 0.354527  |
| 18140 | 10604641 |                                    |                        |                                |                               | 0.845 | -1.993 | 0.0853463  | 0.280473  |
| 18141 | 10375501 |                                    |                        |                                |                               | 0.845 | -2.111 | 0.0715095  | 0.251246  |
| 18142 | 10547894 | <a href="#">NM_013488</a>          | <a href="#">12504</a>  | CD4 antigen                    | <a href="#">Cd4</a>           | 0.845 | -1.603 | 0.151784   | 0.395645  |

|       |          |                                     |                        |                                |                               |       |        |            |           |
|-------|----------|-------------------------------------|------------------------|--------------------------------|-------------------------------|-------|--------|------------|-----------|
| 18143 | 10589784 | <a href="#">NM_172928</a>           | <a href="#">245038</a> | doublecortin-like kinase 3     | <a href="#">Delc3</a>         | 0.845 | -2.83  | 0.024626   | 0.126168  |
| 18144 | 10423556 | <a href="#">NM_018755</a>           | <a href="#">54381</a>  | plasma glutamate carboxypeptid | <a href="#">Pgcp</a>          | 0.845 | -2.425 | 0.0447425  | 0.187121  |
| 18145 | 10459329 | <a href="#">ENSMUST00000048109</a>  | <a href="#">78449</a>  | RIKEN cDNA 2700046A07 gene     | <a href="#">2700046A07Rik</a> | 0.845 | -1.116 | 0.300416   | 0.576564  |
| 18146 | 10483871 | <a href="#">NM_011652</a>           | <a href="#">22138</a>  | titin                          | <a href="#">Ttn</a>           | 0.845 | -3.272 | 0.0130801  | 0.0818967 |
| 18147 | 10474541 | <a href="#">NM_025403</a>           | <a href="#">66181</a>  | nucleolar protein family A, me | <a href="#">Nola3</a>         | 0.845 | -2.305 | 0.0535443  | 0.209868  |
| 18148 | 10587255 | <a href="#">NM_172925</a>           | <a href="#">244923</a> | kelch-like 31 (Drosophila)     | <a href="#">Klh131</a>        | 0.845 | -2.927 | 0.0213862  | 0.114508  |
| 18149 | 10557434 | <a href="#">NM_138310</a>           | <a href="#">171504</a> | apolipoprotein B48 receptor    | <a href="#">Apob48r</a>       | 0.845 | -2.364 | 0.0490096  | 0.198517  |
| 18150 | 10414590 | <a href="#">NM_053111</a>           | <a href="#">93719</a>  | eosinophil-associated, ribonuc | <a href="#">Ear6</a>          | 0.845 | -2.441 | 0.0437165  | 0.184132  |
| 18151 | 10544403 | <a href="#">NM_146576</a>           | <a href="#">258569</a> | olfactory receptor 459         | <a href="#">Olf459</a>        | 0.845 | -2.038 | 0.0797183  | 0.269041  |
| 18152 | 10453555 | <a href="#">NM_153780</a>           | <a href="#">72139</a>  | RIKEN cDNA 2610044O15 gene     | <a href="#">2610044O15Rik</a> | 0.845 | -2.414 | 0.0455231  | 0.18878   |
| 18153 | 10593421 | <a href="#">CT010205</a>            | <a href="#">68721</a>  | RIKEN cDNA 1110032A03 gene     | <a href="#">1110032A03Rik</a> | 0.845 | -2.655 | 0.0318113  | 0.149238  |
| 18154 | 10568951 | <a href="#">NM_146952</a>           | <a href="#">258954</a> | olfactory receptor 522         | <a href="#">Olf522</a>        | 0.845 | -1.179 | 0.275857   | 0.550733  |
| 18155 | 10565341 | <a href="#">XM_884867</a>           | <a href="#">620480</a> | predicted gene, EG620480       | <a href="#">EG620480</a>      | 0.845 | -2.215 | 0.0612251  | 0.228343  |
| 18156 | 10565873 | <a href="#">NM_028292</a>           | <a href="#">72590</a>  | protein phosphatase methyleste | <a href="#">Ppme1</a>         | 0.845 | -3.342 | 0.0118539  | 0.0762284 |
| 18157 | 10362129 | <a href="#">NM_011979</a>           | <a href="#">26464</a>  | vanin 3                        | <a href="#">Vnn3</a>          | 0.845 | -1.877 | 0.101453   | 0.312109  |
| 18158 | 10397518 | <a href="#">NM_146036</a>           | <a href="#">217737</a> | AHA1, activator of heat shock  | <a href="#">Ahsa1</a>         | 0.845 | -3.095 | 0.0167931  | 0.0975911 |
| 18159 | 10582403 | <a href="#">NM_016722</a>           | <a href="#">50917</a>  | galactosamine (N-acetyl)-6-sul | <a href="#">Galns</a>         | 0.844 | -2.371 | 0.0485091  | 0.196834  |
| 18160 | 10344895 | <a href="#">XR_032183</a>           | <a href="#">665262</a> | similar to adenine nucleotide  | <a href="#">LOC665262</a>     | 0.844 | -1.765 | 0.119633   | 0.345914  |
| 18161 | 10494060 | <a href="#">NM_030116</a>           | <a href="#">78523</a>  | mitochondrial ribosomal protei | <a href="#">Mrpl9</a>         | 0.844 | -2.404 | 0.0461566  | 0.190761  |
| 18162 | 10599658 |                                     |                        |                                |                               | 0.844 | -0.881 | 0.406643   | 0.6712    |
| 18163 | 10593198 | <a href="#">NM_030069</a>           | <a href="#">78252</a>  | RIKEN cDNA 4432416J03 gene     | <a href="#">4432416J03Rik</a> | 0.844 | -0.894 | 0.400094   | 0.666004  |
| 18164 | 10442057 | <a href="#">NM_025934</a>           | <a href="#">67045</a>  | RIO kinase 2 (yeast)           | <a href="#">Riok2</a>         | 0.844 | -2.074 | 0.0756271  | 0.26001   |
| 18165 | 10419460 | <a href="#">NM_177625</a>           | <a href="#">219022</a> | tetratricopeptide repeat domai | <a href="#">Ttc5</a>          | 0.844 | -2.191 | 0.0634497  | 0.233643  |
| 18166 | 10494441 | <a href="#">NM_001024851</a>        | <a href="#">545554</a> | ankyrin repeat domain 34A      | <a href="#">Ankrd34a</a>      | 0.844 | -2.846 | 0.0240617  | 0.124118  |
| 18167 | 10468795 | <a href="#">NM_001033172</a>        | <a href="#">74998</a>  | RAB11 family interacting prote | <a href="#">Rab11fip2</a>     | 0.844 | -2.207 | 0.0619203  | 0.229974  |
| 18168 | 10583179 | <a href="#">NM_008829</a>           | <a href="#">18667</a>  | progesterone receptor          | <a href="#">Pgr</a>           | 0.844 | -2.717 | 0.0290742  | 0.140292  |
| 18169 | 10523901 |                                     |                        |                                |                               | 0.844 | -0.739 | 0.483505   | 0.73227   |
| 18170 | 10565862 | <a href="#">NM_133692</a>           | <a href="#">67967</a>  | polymerase (DNA-directed), del | <a href="#">Pold3</a>         | 0.844 | -2.054 | 0.0778819  | 0.265431  |
| 18171 | 10546229 |                                     |                        |                                |                               | 0.844 | -0.789 | 0.455078   | 0.711341  |
| 18172 | 10501074 | <a href="#">NM_001111143</a>        | <a href="#">229697</a> | gene model 131, (NCBI)         | <a href="#">Gm131</a>         | 0.844 | -1.473 | 0.183133   | 0.440069  |
| 18173 | 10460149 | <a href="#">XR_001789</a>           | <a href="#">665806</a> | predicted gene, EG665806       | <a href="#">EG665806</a>      | 0.844 | -2.068 | 0.0762907  | 0.261682  |
| 18174 | 10546088 | <a href="#">NM_198622</a>           | <a href="#">243529</a> | H1 histone family, member X    | <a href="#">H1fx</a>          | 0.844 | -4.152 | 0.00401441 | 0.0350747 |
| 18175 | 10471563 | <a href="#">ENSMUST00000065087</a>  | <a href="#">329385</a> | Riken cDNA C130021I20 gene     | <a href="#">C130021I20Rik</a> | 0.844 | -2.113 | 0.0712692  | 0.250796  |
| 18176 | 10560842 | <a href="#">NM_009568</a>           | <a href="#">22756</a>  | zinc finger protein 94         | <a href="#">Zfp94</a>         | 0.844 | -1.961 | 0.0895183  | 0.28881   |
| 18177 | 10596279 | <a href="#">ENSMUST00000060084</a>  | <a href="#">235567</a> | DnaJ (Hsp40) homolog, subfamil | <a href="#">Dnajc13</a>       | 0.844 | -1.644 | 0.142847   | 0.382955  |
| 18178 | 10484941 | <a href="#">NM_145527</a>           | <a href="#">228355</a> | MAP-kinase activating death do | <a href="#">Madd</a>          | 0.844 | -2.75  | 0.0276828  | 0.13614   |
| 18179 | 10392347 | <a href="#">NM_145823</a>           | <a href="#">71795</a>  | phosphatidylinositol transfer  | <a href="#">Pitpnc1</a>       | 0.844 | -3.81  | 0.00626611 | 0.048425  |
| 18180 | 10425834 | <a href="#">NM_178614</a>           | <a href="#">68653</a>  | sorting and assembly machinery | <a href="#">Samm50</a>        | 0.844 | -3.122 | 0.0161698  | 0.0951294 |
| 18181 | 10572733 | <a href="#">BC049349</a>            | <a href="#">234413</a> | cDNA sequence BC049349         | <a href="#">BC049349</a>      | 0.844 | -2.048 | 0.0785724  | 0.266838  |
| 18182 | 10478523 |                                     |                        |                                |                               | 0.844 | -1.206 | 0.265762   | 0.540834  |
| 18183 | 10497090 | <a href="#">NM_001013806</a>        | <a href="#">433667</a> | ankyrin repeat domain 13c      | <a href="#">Ankrd13c</a>      | 0.844 | -3.482 | 0.00976346 | 0.0669403 |
| 18184 | 10489368 | <a href="#">NM_173397</a>           | <a href="#">228859</a> | RIKEN cDNA D930001I22 gene     | <a href="#">D930001I22Rik</a> | 0.843 | -1.979 | 0.0871174  | 0.284086  |
| 18185 | 10349333 | <a href="#">BC028767</a>            | <a href="#">73103</a>  | RIKEN cDNA 3110009E18 gene     | <a href="#">3110009E18Rik</a> | 0.843 | -1.98  | 0.0869824  | 0.283733  |
| 18186 | 10470905 | <a href="#">AK031561</a>            | <a href="#">56086</a>  | SET translocation              | <a href="#">Set</a>           | 0.843 | -0.954 | 0.371051   | 0.641955  |
| 18187 | 10604342 | <a href="#">NM_001085510</a>        | <a href="#">245405</a> | predicted gene, EG245405       | <a href="#">EG245405</a>      | 0.843 | -0.891 | 0.401904   | 0.667094  |
| 18188 | 10400718 | <a href="#">ENSMUST000000035773</a> | <a href="#">20663</a>  | Son of sevenless homolog 2 (Dr | <a href="#">Sos2</a>          | 0.843 | -2.804 | 0.0255884  | 0.129436  |
| 18189 | 10550715 | <a href="#">NM_025960</a>           | <a href="#">67091</a>  | trafficking protein particle c | <a href="#">Trappc6a</a>      | 0.843 | -4.366 | 0.0030662  | 0.0291248 |
| 18190 | 10450862 | <a href="#">NM_001011518</a>        | <a href="#">258219</a> | olfactory receptor 94          | <a href="#">Olf94</a>         | 0.843 | -1.548 | 0.16432    | 0.414109  |
| 18191 | 10381304 | <a href="#">NM_026776</a>           | <a href="#">28084</a>  | vacuolar protein sorting 25 (y | <a href="#">Vps25</a>         | 0.843 | -4.14  | 0.00407628 | 0.0354541 |
| 18192 | 10605081 | <a href="#">NM_012060</a>           | <a href="#">27061</a>  | B-cell receptor-associated pro | <a href="#">Bcap31</a>        | 0.843 | -2.845 | 0.0240996  | 0.124223  |
| 18193 | 10593927 | <a href="#">NM_020270</a>           | <a href="#">56807</a>  | secretory carrier membrane pro | <a href="#">Scamp5</a>        | 0.843 | -2.492 | 0.0405387  | 0.175358  |
| 18194 | 10428809 | <a href="#">BC132483</a>            | <a href="#">268807</a> | RIKEN cDNA 8230402K04 gene     | <a href="#">8230402K04Rik</a> | 0.843 | -1.458 | 0.187027   | 0.445377  |
| 18195 | 10583071 | <a href="#">NM_010809</a>           | <a href="#">17392</a>  | matrix metalloproteinase 3     | <a href="#">Mmp3</a>          | 0.843 | -1.604 | 0.151567   | 0.395471  |
| 18196 | 10498011 |                                     |                        |                                |                               | 0.843 | -1.529 | 0.168978   | 0.420416  |

|       |          |                                    |                           |                                |                                    |       |        |            |           |
|-------|----------|------------------------------------|---------------------------|--------------------------------|------------------------------------|-------|--------|------------|-----------|
| 18197 | 10557399 | <a href="#">NM_145587</a>          | <a href="#">104175</a>    | SH3-binding kinase 1           | <a href="#">Sbk1</a>               | 0.843 | -2.392 | 0.0470083  | 0.192737  |
| 18198 | 10430941 | <a href="#">BC012523</a>           | <a href="#">74778</a>     | RIKEN cDNA 1110014J01 gene     | <a href="#">1110014J01Rik</a>      | 0.843 | -2.396 | 0.0467062  | 0.191982  |
| 18199 | 10481272 | <a href="#">BC099566</a>           | <a href="#">69327</a>     | RIKEN cDNA 1700007K13 gene     | <a href="#">1700007K13Rik</a>      | 0.843 | -1.711 | 0.129614   | 0.361026  |
| 18200 | 10560608 | <a href="#">NM_009695</a>          | <a href="#">11813</a>     | apolipoprotein C-II            | <a href="#">Apoc2</a>              | 0.843 | -1.616 | 0.148863   | 0.391099  |
| 18201 | 10592170 |                                    |                           |                                |                                    | 0.843 | -3.168 | 0.0151544  | 0.0910185 |
| 18202 | 10593789 | <a href="#">NM_145615</a>          | <a href="#">110842</a>    | electron transferring flavopro | <a href="#">Etfa</a>               | 0.843 | -2.8   | 0.0257297  | 0.129902  |
| 18203 | 10356936 | <a href="#">NM_173760</a>          | <a href="#">227399</a>    | histidine acid phosphatase dom | <a href="#">Hisppd1</a>            | 0.843 | -3.186 | 0.0147697  | 0.0892259 |
| 18204 | 10578515 | <a href="#">NM_001039562</a>       | <a href="#">654824</a>    | ankyrin repeat domain 37       | <a href="#">Ankrd37</a>            | 0.843 | -2.479 | 0.0412805  | 0.177297  |
| 18205 | 10550400 | <a href="#">NM_001099636</a>       | <a href="#">434128</a>    | PNMA-like 2                    | <a href="#">Pnmal2</a>             | 0.843 | -2.598 | 0.0346091  | 0.157846  |
| 18206 | 10525780 | <a href="#">NM_026486</a>          | <a href="#">67978</a>     | tectonic family member 2       | <a href="#">Tctn2</a>              | 0.843 | -3.145 | 0.0156478  | 0.0929115 |
| 18207 | 10431147 | <a href="#">NM_177630</a>          | <a href="#">223732</a>    | leucine zipper, down-regulated | <a href="#">Ldoc1l</a>             | 0.843 | -3.928 | 0.00536269 | 0.043444  |
| 18208 | 10413314 | <a href="#">AK136848</a>           | <a href="#">654819</a>    | RIKEN cDNA 9930004E17 gene     | <a href="#">9930004E17Rik</a>      | 0.843 | -2.524 | 0.0386225  | 0.16991   |
| 18209 | 10400742 | <a href="#">NM_145443</a>          | <a href="#">217666</a>    | L-2-hydroxyglutarate dehydroge | <a href="#">L2hgdh</a>             | 0.843 | -2.466 | 0.0421106  | 0.17955   |
| 18210 | 10556583 | <a href="#">NM_016773</a>          | <a href="#">53322</a>     | nucleobindin 2                 | <a href="#">Nucb2</a>              | 0.843 | -2.308 | 0.0532574  | 0.209308  |
| 18211 | 10374020 | <a href="#">NM_177370</a>          | <a href="#">279766</a>    | rhomboid domain containing 3   | <a href="#">Rhbdd3</a>             | 0.843 | -3.258 | 0.0133394  | 0.0830286 |
| 18212 | 10490370 | <a href="#">NM_011969</a>          | <a href="#">26444</a>     | proteasome (prosome, macropain | <a href="#">Psm7</a>               | 0.843 | -4.106 | 0.00425779 | 0.036522  |
| 18213 | 10375909 | <a href="#">NM_153785</a>          | <a href="#">213084</a>    | cyclin-dependent kinase-like 3 | <a href="#">Cdk13</a>              | 0.843 | -2.874 | 0.023088   | 0.120775  |
| 18214 | 10378082 | <a href="#">NM_027819</a>          | <a href="#">71522</a>     | gamma-glutamyltransferase 6    | <a href="#">Ggt6</a>               | 0.843 | -1.738 | 0.124444   | 0.35337   |
| 18215 | 10523376 | <a href="#">NM_175473</a>          | <a href="#">231470</a>    | Fraser syndrome 1 homolog (hum | <a href="#">Fras1</a>              | 0.843 | -2.827 | 0.0247361  | 0.126547  |
| 18216 | 10465220 | <a href="#">NM_020491</a>          | <a href="#">56390</a>     | Sjogren's syndrome/scleroderma | <a href="#">Sssca1</a>             | 0.842 | -3.66  | 0.00766033 | 0.0563022 |
| 18217 | 10511795 | <a href="#">NM_001080771</a>       | <a href="#">230025</a>    | PR domain containing 13        | <a href="#">Prdm13</a>             | 0.842 | -1.845 | 0.10631    | 0.321598  |
| 18218 | 10584712 | <a href="#">NM_021395</a>          | <a href="#">12282</a>     | hypoxia up-regulated 1         | <a href="#">Hyou1</a>              | 0.842 | -4.278 | 0.00342019 | 0.0313194 |
| 18219 | 10517892 | <a href="#">NM_001025608</a>       | <a href="#">213491</a>    | DNA segment, Chr 4, ERATO Doi  | <a href="#">D4Ert22e</a>           | 0.842 | -2.248 | 0.0582994  | 0.221767  |
| 18220 | 10405074 | <a href="#">NM_001081350</a>       | <a href="#">70930</a>     | nucleolar protein 8            | <a href="#">Nol8</a>               | 0.842 | -3.438 | 0.0103751  | 0.0698    |
| 18221 | 10489372 | <a href="#">BC025862</a>           | <a href="#">68314</a>     | RIKEN cDNA 0610008F07 gene     | <a href="#">0610008F07Rik</a>      | 0.842 | -2.123 | 0.0703003  | 0.248442  |
| 18222 | 10387733 | <a href="#">NM_181582</a>          | <a href="#">276770</a>    | eukaryotic translation initiat | <a href="#">Eif5a</a>              | 0.842 | -2.97  | 0.0201023  | 0.110172  |
| 18223 | 10508468 | <a href="#">BC024696</a>           | <a href="#">76799</a>     | RIKEN cDNA 2510006D16 gene     | <a href="#">2510006D16Rik</a>      | 0.842 | -2.795 | 0.0259176  | 0.130415  |
| 18224 | 10544704 | <a href="#">NM_021892</a>          | <a href="#">60531</a>     | neuropeptide VF precursor      | <a href="#">Npvf</a>               | 0.842 | -1.461 | 0.186157   | 0.444356  |
| 18225 | 10504456 | <a href="#">NM_001002787</a>       | <a href="#">442829</a>    | calicin                        | <a href="#">Ccin</a>               | 0.842 | -0.912 | 0.391356   | 0.659653  |
| 18226 | 10593882 | <a href="#">ENSMUST00000098697</a> | <a href="#">100038566</a> | predicted gene, ENSMUSG0000007 | <a href="#">ENSMUSG00000074284</a> | 0.842 | -1.839 | 0.107273   | 0.322736  |
| 18227 | 10349868 | <a href="#">NM_133819</a>          | <a href="#">108954</a>    | protein phosphatase 1, regulat | <a href="#">Ppp1r15b</a>           | 0.842 | -3.282 | 0.0129004  | 0.0810359 |
| 18228 | 10495252 | <a href="#">NM_025946</a>          | <a href="#">67067</a>     | RIKEN cDNA 20101000I2 gene     | <a href="#">20101000I2Rik</a>      | 0.842 | -2.621 | 0.0334557  | 0.154317  |
| 18229 | 10554778 | <a href="#">NM_001081414</a>       | <a href="#">108071</a>    | glutamate receptor, metabotrop | <a href="#">Grm5</a>               | 0.842 | -2.171 | 0.0654361  | 0.238533  |
| 18230 | 10410039 | <a href="#">NM_008957</a>          | <a href="#">19206</a>     | patched homolog 1              | <a href="#">Ptc1</a>               | 0.842 | -3.062 | 0.0176009  | 0.100419  |
| 18231 | 10383395 | <a href="#">NM_013770</a>          | <a href="#">27376</a>     | solute carrier family 25 (mito | <a href="#">Slc25a10</a>           | 0.842 | -4.217 | 0.00369371 | 0.0330791 |
| 18232 | 10462390 | <a href="#">NM_021893</a>          | <a href="#">60533</a>     | CD274 antigen                  | <a href="#">Cd274</a>              | 0.842 | -2.349 | 0.0501274  | 0.201363  |
| 18233 | 10410508 | <a href="#">NM_010888</a>          | <a href="#">407785</a>    | NADH dehydrogenase (ubiquinone | <a href="#">Ndufs6</a>             | 0.842 | -3.376 | 0.0113138  | 0.0736965 |
| 18234 | 10481499 | <a href="#">BC023044</a>           | <a href="#">73598</a>     | RIKEN cDNA 1700001O22 gene     | <a href="#">1700001O22Rik</a>      | 0.842 | -1.707 | 0.130234   | 0.362012  |
| 18235 | 10419198 | <a href="#">NM_015774</a>          | <a href="#">50527</a>     | ERO1-like (S. cerevisiae)      | <a href="#">Ero1l</a>              | 0.842 | -2.237 | 0.0592201  | 0.224032  |
| 18236 | 10592162 | <a href="#">XM_001477902</a>       | <a href="#">100047164</a> | similar to high mobility group | <a href="#">LOC100047164</a>       | 0.842 | -1.31  | 0.230529   | 0.501476  |
| 18237 | 10554164 | <a href="#">XM_001477681</a>       | <a href="#">100042171</a> | similar to 40S ribosomal prote | <a href="#">LOC100042171</a>       | 0.842 | -1.474 | 0.182782   | 0.439545  |
| 18238 | 10551162 | <a href="#">NM_025504</a>          | <a href="#">66349</a>     | ATP5S-like                     | <a href="#">Atp5sl</a>             | 0.842 | -1.814 | 0.111342   | 0.33023   |
| 18239 | 10547227 | <a href="#">NM_001080780</a>       | <a href="#">19713</a>     | ret proto-oncogene             | <a href="#">Ret</a>                | 0.842 | -3.077 | 0.0172318  | 0.0992523 |
| 18240 | 10596857 | <a href="#">NM_146226</a>          | <a href="#">235606</a>    | acylpeptide hydrolase          | <a href="#">Apeh</a>               | 0.842 | -2.754 | 0.0275141  | 0.135576  |
| 18241 | 10347106 | <a href="#">NM_025683</a>          | <a href="#">66646</a>     | ribulose-5-phosphate-3-epimera | <a href="#">Rpe</a>                | 0.842 | -2.69  | 0.0302163  | 0.144448  |
| 18242 | 10488575 | <a href="#">NM_212446</a>          | <a href="#">228769</a>    | proteasome (prosome, macropain | <a href="#">Psmf1</a>              | 0.842 | -3.192 | 0.0146444  | 0.0887225 |
| 18243 | 10411506 | <a href="#">XR_033231</a>          | <a href="#">100047350</a> | similar to Ribosomal protein L | <a href="#">LOC100047350</a>       | 0.842 | -1.028 | 0.336968   | 0.6127    |
| 18244 | 10346882 | <a href="#">NM_011780</a>          | <a href="#">23792</a>     | a disintegrin and metallopepti | <a href="#">Adam23</a>             | 0.842 | -1.225 | 0.258901   | 0.53308   |
| 18245 | 10353064 | <a href="#">NM_001102430</a>       | <a href="#">211673</a>    | ADP-ribosylation factor guanin | <a href="#">Arfgef1</a>            | 0.841 | -2.476 | 0.0414818  | 0.177631  |
| 18246 | 10350951 | <a href="#">NM_022312</a>          | <a href="#">21960</a>     | tenascin R                     | <a href="#">Tnr</a>                | 0.841 | -2.33  | 0.0515842  | 0.205217  |

|       |          |                                    |                        |                                |                                    |       |        |            |           |
|-------|----------|------------------------------------|------------------------|--------------------------------|------------------------------------|-------|--------|------------|-----------|
| 18247 | 10416705 | <a href="#">XR_033980</a>          | <a href="#">668603</a> | similar to Rpl17 protein       | <a href="#">LOC668603</a>          | 0.841 | -3.151 | 0.0155142  | 0.0924676 |
| 18248 | 10535852 | <a href="#">NM_007513</a>          | <a href="#">11987</a>  | solute carrier family 7 (catio | <a href="#">Slc7a1</a>             | 0.841 | -2.446 | 0.0434071  | 0.18312   |
| 18249 | 10494664 | <a href="#">NM_027462</a>          | <a href="#">70560</a>  | tryptophanyl tRNA synthetase 2 | <a href="#">Wars2</a>              | 0.841 | -2.232 | 0.0597202  | 0.225162  |
| 18250 | 10590888 | <a href="#">XR_031035</a>          | <a href="#">665154</a> | similar to MGC27348 protein    | <a href="#">LOC665154</a>          | 0.841 | -1.625 | 0.147002   | 0.388942  |
| 18251 | 10590890 |                                    |                        |                                |                                    | 0.841 | -1.464 | 0.185462   | 0.443349  |
| 18252 | 10376002 |                                    |                        |                                |                                    | 0.841 | -1.34  | 0.220873   | 0.489996  |
| 18253 | 10503200 | <a href="#">NM_001081417</a>       | <a href="#">320790</a> | chromodomain helicase DNA bind | <a href="#">Chd7</a>               | 0.841 | -1.903 | 0.0974795  | 0.304223  |
| 18254 | 10574157 |                                    |                        |                                |                                    | 0.841 | -2.917 | 0.0216905  | 0.115697  |
| 18255 | 10456158 | <a href="#">ENSMUST00000067743</a> | <a href="#">225609</a> | predicted gene, EG225609       | <a href="#">EG225609</a>           | 0.841 | -1.199 | 0.268367   | 0.542786  |
| 18256 | 10468046 | <a href="#">NM_010691</a>          | <a href="#">16814</a>  | ladybird homeobox homolog 1 (D | <a href="#">Lbx1</a>               | 0.841 | -2.017 | 0.0822666  | 0.274404  |
| 18257 | 10455691 | <a href="#">NM_026286</a>          | <a href="#">67634</a>  | ferritin mitochondrial         | <a href="#">Ftmt</a>               | 0.841 | -1.222 | 0.260147   | 0.534552  |
| 18258 | 10594802 | <a href="#">NM_172772</a>          | <a href="#">235461</a> | RIKEN cDNA B230380D07 gene     | <a href="#">B230380D07Rik</a>      | 0.841 | -1.984 | 0.0864385  | 0.282525  |
| 18259 | 10582669 | <a href="#">NM_145607</a>          | <a href="#">234875</a> | tetratricopeptide repeat domai | <a href="#">Ttc13</a>              | 0.841 | -3.607 | 0.00822706 | 0.0590738 |
| 18260 | 10602474 | <a href="#">NM_001113354</a>       | <a href="#">320595</a> | PHD finger protein 8           | <a href="#">Phf8</a>               | 0.841 | -3.39  | 0.0110911  | 0.0728453 |
| 18261 | 10501048 | <a href="#">AK140363</a>           | <a href="#">69206</a>  | RIKEN cDNA 2010016118 gene     | <a href="#">2010016118Rik</a>      | 0.841 | -2.681 | 0.0306411  | 0.145754  |
| 18262 | 10376726 | <a href="#">NM_145428</a>          | <a href="#">216820</a> | dehydrogenase/reductase (SDR f | <a href="#">Dhrs7b</a>             | 0.841 | -3.846 | 0.00597234 | 0.0468395 |
| 18263 | 10517083 | <a href="#">NM_178698</a>          | <a href="#">230801</a> | phosphatidylinositol glycan an | <a href="#">Pigv</a>               | 0.841 | -2.023 | 0.0816025  | 0.272821  |
| 18264 | 10352503 | <a href="#">NM_011794</a>          | <a href="#">23827</a>  | bisphosphate 3'-nucleotidase 1 | <a href="#">Bpnt1</a>              | 0.841 | -3.41  | 0.0107906  | 0.0715675 |
| 18265 | 10372293 | <a href="#">XM_893664</a>          | <a href="#">628870</a> | predicted gene, EG628870       | <a href="#">EG628870</a>           | 0.841 | -1.37  | 0.21181    | 0.477389  |
| 18266 | 10569280 | <a href="#">NM_008748</a>          | <a href="#">18218</a>  | dual specificity phosphatase 8 | <a href="#">Dusp8</a>              | 0.841 | -2.141 | 0.0683728  | 0.244408  |
| 18267 | 10576692 | <a href="#">NM_010568</a>          | <a href="#">16337</a>  | insulin receptor               | <a href="#">Insr</a>               | 0.841 | -1.756 | 0.121236   | 0.347818  |
| 18268 | 10578109 | <a href="#">NM_178648</a>          | <a href="#">108159</a> | UBX domain containing 6        | <a href="#">Ubx6</a>               | 0.841 | -2.904 | 0.0221034  | 0.117082  |
| 18269 | 10460010 | <a href="#">NM_008082</a>          | <a href="#">14427</a>  | galanin receptor 1             | <a href="#">Galr1</a>              | 0.841 | -2.06  | 0.0771949  | 0.263727  |
| 18270 | 10524866 | <a href="#">NM_001033311</a>       | <a href="#">231668</a> | cDNA sequence BC023744         | <a href="#">BC023744</a>           | 0.841 | -1.67  | 0.137511   | 0.374537  |
| 18271 | 10356593 | <a href="#">NM_019479</a>          | <a href="#">55927</a>  | hairy and enhancer of split 6  | <a href="#">Hes6</a>               | 0.841 | -1.544 | 0.165299   | 0.415472  |
| 18272 | 10597945 | <a href="#">NM_001002267</a>       | <a href="#">72309</a>  | transmembrane protein 158      | <a href="#">Tmem158</a>            | 0.84  | -1.709 | 0.129925   | 0.361535  |
| 18273 | 10441091 | <a href="#">AK078339</a>           | <a href="#">791404</a> | predicted gene, ENSMUSG0000005 | <a href="#">ENSMUSG00000055423</a> | 0.84  | -2.14  | 0.0684955  | 0.244681  |
| 18274 | 10569308 | <a href="#">NM_015808</a>          | <a href="#">50774</a>  | keratin associated protein 5-1 | <a href="#">Krtap5-1</a>           | 0.84  | -1.145 | 0.288939   | 0.565029  |
| 18275 | 10571288 | <a href="#">NM_026584</a>          | <a href="#">68153</a>  | general transcription factor I | <a href="#">Gtf2e2</a>             | 0.84  | -4.392 | 0.00296668 | 0.0285255 |
| 18276 | 10490384 | <a href="#">NM_001081171</a>       | <a href="#">16776</a>  | laminin, alpha 5               | <a href="#">Lama5</a>              | 0.84  | -3.381 | 0.0112281  | 0.0733781 |
| 18277 | 10580984 | <a href="#">XR_032470</a>          | <a href="#">636859</a> | similar to Glyceraldehyde-3-ph | <a href="#">LOC636859</a>          | 0.84  | -1.787 | 0.115907   | 0.338549  |
| 18278 | 10548727 |                                    |                        |                                |                                    | 0.84  | -0.756 | 0.473361   | 0.725045  |
| 18279 | 10580733 | <a href="#">NM_026116</a>          | <a href="#">67378</a>  | Bardet-Biedl syndrome 2 homolo | <a href="#">Bbs2</a>               | 0.84  | -3.042 | 0.0181289  | 0.102464  |
| 18280 | 10403945 | <a href="#">NM_178210</a>          | <a href="#">319159</a> | histone cluster 1, H4j         | <a href="#">Hist1h4j</a>           | 0.84  | -2.118 | 0.0707452  | 0.249639  |
| 18281 | 10478508 | <a href="#">NM_133779</a>          | <a href="#">78928</a>  | phosphatidylinositol glycan an | <a href="#">Pigt</a>               | 0.84  | -3.787 | 0.00646332 | 0.0494788 |
| 18282 | 10542407 | <a href="#">NM_023898</a>          | <a href="#">78600</a>  | phosphodiesterase 6H, cGMP-spe | <a href="#">Pde6h</a>              | 0.84  | -1.845 | 0.106282   | 0.321598  |
| 18283 | 10357261 | <a href="#">NM_010766</a>          | <a href="#">17167</a>  | macrophage receptor with colla | <a href="#">Marco</a>              | 0.84  | -2.349 | 0.0501341  | 0.201363  |
| 18284 | 10445977 | <a href="#">NM_015766</a>          | <a href="#">50498</a>  | Epstein-Barr virus induced gen | <a href="#">Ebi3</a>               | 0.84  | -2.322 | 0.0522183  | 0.206719  |
| 18285 | 10499062 | <a href="#">NM_001033301</a>       | <a href="#">229474</a> | FH2 domain containing 1        | <a href="#">Fhdc1</a>              | 0.84  | -1.136 | 0.2923     | 0.568468  |
| 18286 | 10537347 |                                    |                        |                                |                                    | 0.84  | -2.353 | 0.0498075  | 0.200566  |
| 18287 | 10589511 | <a href="#">NM_001001144</a>       | <a href="#">235623</a> | SREBF chaperone                | <a href="#">Scap</a>               | 0.84  | -3.886 | 0.00566638 | 0.0452113 |
| 18288 | 10364712 | <a href="#">NM_007705</a>          | <a href="#">12696</a>  | cold inducible RNA binding pro | <a href="#">Cirbp</a>              | 0.84  | -3.107 | 0.0165144  | 0.0964322 |
| 18289 | 10436348 | <a href="#">NM_138599</a>          | <a href="#">28185</a>  | translocase of outer mitochond | <a href="#">Tomm70a</a>            | 0.84  | -4.175 | 0.00389722 | 0.0343345 |
| 18290 | 10508901 | <a href="#">NM_133884</a>          | <a href="#">100210</a> | GPN-loop GTPase 2              | <a href="#">Gpn2</a>               | 0.84  | -2.789 | 0.0261634  | 0.130997  |
| 18291 | 10598105 | <a href="#">NM_207175</a>          | <a href="#">258251</a> | olfactory receptor 239         | <a href="#">Olfr239</a>            | 0.84  | -1.401 | 0.202873   | 0.465446  |
| 18292 | 10424349 | <a href="#">NM_009270</a>          | <a href="#">20775</a>  | squalene epoxidase             | <a href="#">Sqle</a>               | 0.839 | -4.02  | 0.00475586 | 0.0397482 |
| 18293 | 10395889 | <a href="#">NM_009216</a>          | <a href="#">20605</a>  | somatostatin receptor 1        | <a href="#">Sstr1</a>              | 0.839 | -1.807 | 0.112507   | 0.33223   |
| 18294 | 10506880 | <a href="#">NM_029571</a>          | <a href="#">100087</a> | KTI12 homolog, chromatin assoc | <a href="#">Kti12</a>              | 0.839 | -4.403 | 0.00292645 | 0.028306  |
| 18295 | 10489535 | <a href="#">NM_027961</a>          | <a href="#">71856</a>  | WAP four-disulfide core domain | <a href="#">Wfdc3</a>              | 0.839 | -2.473 | 0.0416899  | 0.178117  |
| 18296 | 10569437 | <a href="#">NM_009434</a>          | <a href="#">22113</a>  | pleckstrin homology-like domai | <a href="#">Phlda2</a>             | 0.839 | -2.774 | 0.0267139  | 0.132919  |
| 18297 | 10515981 |                                    |                        |                                |                                    | 0.839 | -1.088 | 0.311807   | 0.58828   |

|       |          |                                    |                           |                                   |                                    |       |        |            |           |
|-------|----------|------------------------------------|---------------------------|-----------------------------------|------------------------------------|-------|--------|------------|-----------|
| 18298 | 10374228 | <a href="#">NM_001037928</a>       | <a href="#">626870</a>    | predicted gene,<br>OTTMUSG0000000 | <a href="#">OTTMUSG00000005148</a> | 0.839 | -1.637 | 0.144319   | 0.38563   |
| 18299 | 10499876 | <a href="#">ENSMUST00000029535</a> | <a href="#">69332</a>     | ate cornified envelope-like pr    | <a href="#">Lelp1</a>              | 0.839 | -1.487 | 0.179388   | 0.434675  |
| 18300 | 10430739 | <a href="#">NM_021317</a>          | <a href="#">57755</a>     | DnaJ (Hsp40) homolog, subfamil    | <a href="#">Dnajb7</a>             | 0.839 | -1.117 | 0.299704   | 0.575741  |
| 18301 | 10474271 | <a href="#">XR_034128</a>          | <a href="#">668744</a>    | similar to Tardbp protein         | <a href="#">LOC668744</a>          | 0.839 | -1.641 | 0.14345    | 0.384035  |
| 18302 | 10541670 | <a href="#">NM_181344</a>          | <a href="#">232371</a>    | complement component 1, r subc    | <a href="#">C1rl</a>               | 0.839 | -1.6   | 0.152374   | 0.396241  |
| 18303 | 10428238 | <a href="#">NM_001081359</a>       | <a href="#">70790</a>     | ubiquitin protein ligase E3 co    | <a href="#">Ubr5</a>               | 0.839 | -3.694 | 0.00731687 | 0.0544884 |
| 18304 | 10429178 | <a href="#">NM_198644</a>          | <a href="#">380993</a>    | zinc finger and AT hook domain    | <a href="#">Zfat</a>               | 0.839 | -2.673 | 0.0310062  | 0.146929  |
| 18305 | 10577230 | <a href="#">NM_001034862</a>       | <a href="#">234086</a>    | glutamate-rich 1                  | <a href="#">Erich1</a>             | 0.839 | -2.417 | 0.0452966  | 0.1882    |
| 18306 | 10411373 | <a href="#">NM_010422</a>          | <a href="#">15212</a>     | hexosaminidase B                  | <a href="#">Hexb</a>               | 0.839 | -2.828 | 0.0247112  | 0.126481  |
| 18307 | 10400391 | <a href="#">NM_145632</a>          | <a href="#">245841</a>    | polymerase (RNA) II (DNA direc    | <a href="#">Polr2h</a>             | 0.839 | -3.042 | 0.0181284  | 0.102464  |
| 18308 | 10451665 | <a href="#">NM_009694</a>          | <a href="#">11811</a>     | apolipoprotein B editing compl    | <a href="#">Apobec2</a>            | 0.839 | -2.192 | 0.0633477  | 0.23339   |
| 18309 | 10534120 | <a href="#">NM_133768</a>          | <a href="#">109900</a>    | argininosuccinate lyase           | <a href="#">Asl</a>                | 0.839 | -4.26  | 0.00349969 | 0.0317517 |
| 18310 | 10504518 | <a href="#">NM_022811</a>          | <a href="#">64424</a>     | polymerase (RNA) I polypeptide    | <a href="#">Polr1e</a>             | 0.839 | -3.004 | 0.0191539  | 0.106576  |
| 18311 | 10358050 | <a href="#">NM_011590</a>          | <a href="#">21854</a>     | translocase of inner mitochond    | <a href="#">Timm17a</a>            | 0.839 | -3.355 | 0.0116423  | 0.0753259 |
| 18312 | 10376803 | <a href="#">NM_178618</a>          | <a href="#">69640</a>     | RIKEN cDNA 2310040C09 gene        | <a href="#">2310040C09Rik</a>      | 0.839 | -1.958 | 0.089822   | 0.289247  |
| 18313 | 10565811 | <a href="#">NR_002173</a>          | <a href="#">449631</a>    | RNA, U15b small nucleolar         | <a href="#">Rnu15-b</a>            | 0.839 | -1.605 | 0.15131    | 0.395197  |
| 18314 | 10471474 | <a href="#">NM_021515</a>          | <a href="#">11636</a>     | adenylate kinase 1                | <a href="#">Ak1</a>                | 0.839 | -2.826 | 0.0247799  | 0.12668   |
| 18315 | 10507479 | <a href="#">NM_026837</a>          | <a href="#">68777</a>     | transmembrane protein 53          | <a href="#">Tmem53</a>             | 0.839 | -2.719 | 0.0289532  | 0.13996   |
| 18316 | 10427718 | <a href="#">NM_026596</a>          | <a href="#">67852</a>     | brx domain containing 2           | <a href="#">Bxdc2</a>              | 0.839 | -4.448 | 0.00278821 | 0.0273322 |
| 18317 | 10577903 | <a href="#">BC027296</a>           | <a href="#">74653</a>     | RIKEN cDNA 4930444A02 gene        | <a href="#">4930444A02Rik</a>      | 0.839 | -2.01  | 0.0831231  | 0.276258  |
| 18318 | 10440417 | <a href="#">AK140789</a>           | <a href="#">319723</a>    | RIKEN cDNA 9430053O09 gene        | <a href="#">9430053O09Rik</a>      | 0.839 | -1.492 | 0.178161   | 0.432844  |
| 18319 | 10368566 | <a href="#">NM_009413</a>          | <a href="#">21987</a>     | tumor protein D52-like 1          | <a href="#">Tpd52l1</a>            | 0.839 | -2.624 | 0.0333026  | 0.153913  |
| 18320 | 10454369 | <a href="#">NM_175276</a>          | <a href="#">225288</a>    | formin homology 2 domain conta    | <a href="#">Fhod3</a>              | 0.839 | -1.573 | 0.158495   | 0.40535   |
| 18321 | 10388682 | <a href="#">NM_144825</a>          | <a href="#">216965</a>    | TAO kinase 1                      | <a href="#">Taok1</a>              | 0.839 | -2.896 | 0.0223713  | 0.117989  |
| 18322 | 10401820 | <a href="#">ENSMUST00000073177</a> | <a href="#">100038992</a> | similar to beacon                 | <a href="#">LOC100038992</a>       | 0.839 | -2.423 | 0.0448857  | 0.187445  |
| 18323 | 10477642 |                                    |                           |                                   |                                    | 0.838 | -0.696 | 0.507977   | 0.749889  |
| 18324 | 10384555 | <a href="#">NM_181411</a>          | <a href="#">216549</a>    | aftiphilin                        | <a href="#">Aftph</a>              | 0.838 | -2.821 | 0.0249697  | 0.127526  |
| 18325 | 10516596 | <a href="#">NM_153541</a>          | <a href="#">215627</a>    | zinc finger and BTB domain con    | <a href="#">Zbtb8</a>              | 0.838 | -3.085 | 0.0170422  | 0.0985074 |
| 18326 | 10423068 | <a href="#">NM_011232</a>          | <a href="#">19355</a>     | RAD1 homolog (S. pombe)           | <a href="#">Rad1</a>               | 0.838 | -2.868 | 0.0232987  | 0.121277  |
| 18327 | 10529226 | <a href="#">NM_153196</a>          | <a href="#">71336</a>     | ribokinase                        | <a href="#">Rbks</a>               | 0.838 | -3.538 | 0.00904422 | 0.0631751 |
| 18328 | 10519420 | <a href="#">NM_194462</a>          | <a href="#">100986</a>    | A kinase (PRKA) anchor protein    | <a href="#">Akap9</a>              | 0.838 | -2.501 | 0.0399605  | 0.173817  |
| 18329 | 10566574 | <a href="#">NM_029000</a>          | <a href="#">74558</a>     | GTPase, very large interferon     | <a href="#">Gvin1</a>              | 0.838 | -1.744 | 0.123367   | 0.351451  |
| 18330 | 10408047 | <a href="#">AK132930</a>           | <a href="#">100038371</a> | predicted gene,<br>OTTMUSG0000001 | <a href="#">OTTMUSG00000018077</a> | 0.838 | -1.053 | 0.326487   | 0.602834  |
| 18331 | 10428594 | <a href="#">NM_177225</a>          | <a href="#">320679</a>    | sterile alpha motif domain con    | <a href="#">Samd12</a>             | 0.838 | -1.236 | 0.255205   | 0.529492  |
| 18332 | 10432256 | <a href="#">NM_007478</a>          | <a href="#">11842</a>     | ADP-ribosylation factor 3         | <a href="#">Arf3</a>               | 0.838 | -3.954 | 0.00518339 | 0.0422994 |
| 18333 | 10403071 |                                    |                           |                                   |                                    | 0.838 | -1.144 | 0.289165   | 0.565075  |
| 18334 | 10424260 | <a href="#">BC070426</a>           | <a href="#">210998</a>    | DNA segment, Chr 15, ERATO Doi    | <a href="#">D15Ertd621e</a>        | 0.838 | -4.369 | 0.00305185 | 0.0290634 |
| 18335 | 10442206 | <a href="#">NM_009558</a>          | <a href="#">22709</a>     | zinc finger protein 51            | <a href="#">Zfp51</a>              | 0.838 | -2.267 | 0.0566397  | 0.217625  |
| 18336 | 10374558 |                                    |                           |                                   |                                    | 0.838 | -1.632 | 0.14551    | 0.387083  |
| 18337 | 10460498 | <a href="#">NM_007854</a>          | <a href="#">13340</a>     | solute carrier family 29 (nucl    | <a href="#">Slc29a2</a>            | 0.838 | -1.762 | 0.120227   | 0.346569  |
| 18338 | 10365471 | <a href="#">NM_153195</a>          | <a href="#">69754</a>     | F-box protein 7                   | <a href="#">Fbxo7</a>              | 0.838 | -2.297 | 0.0541969  | 0.211623  |
| 18339 | 10568954 | <a href="#">NM_001011814</a>       | <a href="#">258055</a>    | olfactory receptor 524            | <a href="#">Olfr524</a>            | 0.838 | -1.32  | 0.22732    | 0.498027  |
| 18340 | 10550730 | <a href="#">NM_022409</a>          | <a href="#">63872</a>     | zinc finger protein 296           | <a href="#">Zfp296</a>             | 0.838 | -2.188 | 0.0637762  | 0.234479  |
| 18341 | 10565190 |                                    |                           |                                   |                                    | 0.838 | -1.177 | 0.276611   | 0.551708  |
| 18342 | 10575326 | <a href="#">AK156953</a>           | <a href="#">672735</a>    | hypothetical protein LOC672735    | <a href="#">LOC672735</a>          | 0.838 | -2.136 | 0.0689044  | 0.245893  |
| 18343 | 10601537 | <a href="#">XM_910030</a>          | <a href="#">635086</a>    | similar to ubiquitin-conjugati    | <a href="#">LOC635086</a>          | 0.838 | -1.759 | 0.120678   | 0.347112  |
| 18344 | 10367697 | <a href="#">NM_133485</a>          | <a href="#">76142</a>     | protein phosphatase 1, regulat    | <a href="#">Ppp1r14c</a>           | 0.838 | -1.989 | 0.0858496  | 0.28119   |
| 18345 | 10543253 | <a href="#">NM_023653</a>          | <a href="#">22413</a>     | wingless-related MMTV integrat    | <a href="#">Wnt2</a>               | 0.838 | -1.985 | 0.086329   | 0.282254  |
| 18346 | 10388824 | <a href="#">NM_008238</a>          | <a href="#">15218</a>     | forkhead box N1                   | <a href="#">Foxn1</a>              | 0.837 | -2.277 | 0.0557733  | 0.215622  |
| 18347 | 10565072 | <a href="#">NM_019951</a>          | <a href="#">56529</a>     | SEC11 homolog A (S. cerevisiae)   | <a href="#">Sec11a</a>             | 0.837 | -3.492 | 0.00962746 | 0.0661778 |
| 18348 | 10367055 | <a href="#">NM_147222</a>          | <a href="#">216453</a>    | retinol dehydrogenase 19          | <a href="#">Rdh19</a>              | 0.837 | -1.103 | 0.305382   | 0.581741  |

|       |          |                                    |                           |                                |                                    |       |        |            |           |
|-------|----------|------------------------------------|---------------------------|--------------------------------|------------------------------------|-------|--------|------------|-----------|
| 18349 | 10358787 | <a href="#">NM_008485</a>          | <a href="#">16782</a>     | laminin, gamma 2               | <a href="#">Lamc2</a>              | 0.837 | -3.217 | 0.0141198  | 0.0863356 |
| 18350 | 10444046 | <a href="#">NM_019421</a>          | <a href="#">54219</a>     | CD320 antigen                  | <a href="#">Cd320</a>              | 0.837 | -2.333 | 0.0513104  | 0.204584  |
| 18351 | 10560672 | <a href="#">NM_023224</a>          | <a href="#">80794</a>     | Casitas B-lineage lymphoma c   | <a href="#">Cble</a>               | 0.837 | -2.531 | 0.0382251  | 0.168945  |
| 18352 | 10554269 | <a href="#">NM_018811</a>          | <a href="#">54608</a>     | abhydrolase domain containing  | <a href="#">Abhd2</a>              | 0.837 | -1.565 | 0.160366   | 0.407738  |
| 18353 | 10550734 |                                    |                           |                                |                                    | 0.837 | -3.193 | 0.0146068  | 0.0885706 |
| 18354 | 10532709 |                                    |                           |                                |                                    | 0.837 | -1.156 | 0.284424   | 0.559618  |
| 18355 | 10351368 | <a href="#">NM_021610</a>          | <a href="#">59290</a>     | glycoprotein A33 (transmembran | <a href="#">Gpa33</a>              | 0.837 | -1.816 | 0.110962   | 0.329706  |
| 18356 | 10409645 | <a href="#">NM_152234</a>          | <a href="#">56085</a>     | ubiquilin 1                    | <a href="#">Ubqln1</a>             | 0.837 | -3.835 | 0.00605826 | 0.0472588 |
| 18357 | 10353672 |                                    |                           |                                |                                    | 0.837 | -1.131 | 0.294236   | 0.570555  |
| 18358 | 10584572 | <a href="#">NM_031165</a>          | <a href="#">15481</a>     | heat shock protein 8           | <a href="#">Hspa8</a>              | 0.837 | -1.421 | 0.197014   | 0.457727  |
| 18359 | 10444995 | <a href="#">ENSMUST00000097330</a> | <a href="#">547347</a>    | predicted gene, EG547347       | <a href="#">EG547347</a>           | 0.837 | -1.74  | 0.124213   | 0.35291   |
| 18360 | 10600512 | <a href="#">NM_145956</a>          | <a href="#">210766</a>    | BRCA1/BRCA2-containing complex | <a href="#">Brcc3</a>              | 0.837 | -4.339 | 0.00317105 | 0.0298259 |
| 18361 | 10425507 | <a href="#">NM_145132</a>          | <a href="#">207911</a>    | melanin-concentrating hormone  | <a href="#">Mchr1</a>              | 0.837 | -1.617 | 0.148675   | 0.390994  |
| 18362 | 10481435 | <a href="#">NM_172404</a>          | <a href="#">70266</a>     | cysteine conjugate-beta lyase  | <a href="#">Ccb1l</a>              | 0.837 | -2.409 | 0.045801   | 0.189588  |
| 18363 | 10439960 | <a href="#">NM_028815</a>          | <a href="#">74201</a>     | centrosomal protein 97         | <a href="#">Cep97</a>              | 0.837 | -2.029 | 0.0808595  | 0.271466  |
| 18364 | 10504002 | <a href="#">NM_011463</a>          | <a href="#">20731</a>     | serine peptidase inhibitor, Ka | <a href="#">Spink4</a>             | 0.837 | -2.494 | 0.0404063  | 0.175     |
| 18365 | 10517383 | <a href="#">NM_028995</a>          | <a href="#">74552</a>     | NIPA-like domain containing 3  | <a href="#">Npal3</a>              | 0.837 | -2.504 | 0.0398167  | 0.173584  |
| 18366 | 10400004 |                                    |                           |                                |                                    | 0.837 | -1.9   | 0.0979499  | 0.30515   |
| 18367 | 10457916 | <a href="#">XR_031062</a>          | <a href="#">665916</a>    | similar to ribosomal protein L | <a href="#">LOC665916</a>          | 0.837 | -1.998 | 0.0846091  | 0.279309  |
| 18368 | 10569085 | <a href="#">BC119093</a>           | <a href="#">72000</a>     | RIKEN cDNA 1600016N20 gene     | <a href="#">1600016N20Rik</a>      | 0.837 | -2.767 | 0.0270041  | 0.133769  |
| 18369 | 10364130 | <a href="#">NM_177475</a>          | <a href="#">64453</a>     | zinc finger protein 280b       | <a href="#">Zfp280b</a>            | 0.837 | -4.631 | 0.00221442 | 0.0234225 |
| 18370 | 10461162 | <a href="#">NR_004445</a>          | <a href="#">100127111</a> | small nucleolar RNA, C/D box 2 | <a href="#">Snord22</a>            | 0.837 | -1.604 | 0.151425   | 0.395324  |
| 18371 | 10533122 | <a href="#">NM_133902</a>          | <a href="#">257635</a>    | serine dehydratase-like        | <a href="#">Sdsl</a>               | 0.837 | -1.994 | 0.085163   | 0.280273  |
| 18372 | 10559297 | <a href="#">NM_001042760</a>       | <a href="#">18400</a>     | solute carrier family 22 (orga | <a href="#">Slc22a18</a>           | 0.837 | -2.14  | 0.0684894  | 0.244681  |
| 18373 | 10544186 | <a href="#">NM_018810</a>          | <a href="#">54484</a>     | makorin, ring finger protein,  | <a href="#">Mkrn1</a>              | 0.837 | -4.129 | 0.00413288 | 0.0357546 |
| 18374 | 10358023 | <a href="#">NM_134438</a>          | <a href="#">171469</a>    | G protein-coupled receptor 37- | <a href="#">Gpr371l</a>            | 0.837 | -1.618 | 0.148508   | 0.390852  |
| 18375 | 10384020 | <a href="#">NM_017401</a>          | <a href="#">54125</a>     | polymerase (DNA directed), mu  | <a href="#">Polm</a>               | 0.837 | -2.724 | 0.0287396  | 0.139246  |
| 18376 | 10359280 | <a href="#">NM_001085376</a>       | <a href="#">23850</a>     | pappalysin 2                   | <a href="#">Pappa2</a>             | 0.836 | -2.023 | 0.0815139  | 0.272667  |
| 18377 | 10599560 |                                    |                           |                                |                                    | 0.836 | -2.125 | 0.0700096  | 0.247912  |
| 18378 | 10383423 | <a href="#">NM_025389</a>          | <a href="#">66156</a>     | anaphase promoting complex sub | <a href="#">Anapc11</a>            | 0.836 | -2.995 | 0.0193975  | 0.107469  |
| 18379 | 10506714 | <a href="#">NM_053073</a>          | <a href="#">16975</a>     | low density lipoprotein recept | <a href="#">Lrp8</a>               | 0.836 | -2.535 | 0.0380108  | 0.168377  |
| 18380 | 10508382 | <a href="#">NM_016895</a>          | <a href="#">11637</a>     | adenylate kinase 2             | <a href="#">Ak2</a>                | 0.836 | -3.614 | 0.00815734 | 0.0587204 |
| 18381 | 10490770 |                                    |                           |                                |                                    | 0.836 | -1.985 | 0.0863665  | 0.282334  |
| 18382 | 10478633 | <a href="#">NM_013599</a>          | <a href="#">17395</a>     | matrix metallopeptidase 9      | <a href="#">Mmp9</a>               | 0.836 | -4.507 | 0.00257371 | 0.0259383 |
| 18383 | 10521822 | <a href="#">XR_032388</a>          | <a href="#">666265</a>    | similar to ribosomal protein L | <a href="#">LOC666265</a>          | 0.836 | -0.195 | 0.850688   | 0.939953  |
| 18384 | 10443482 | <a href="#">BC058575</a>           | <a href="#">80748</a>     | cDNA sequence BC004004         | <a href="#">BC004004</a>           | 0.836 | -3.896 | 0.00559432 | 0.0448224 |
| 18385 | 10498771 | <a href="#">NM_019745</a>          | <a href="#">56426</a>     | programmed cell death 10       | <a href="#">Pcdcl10</a>            | 0.836 | -2.484 | 0.0409819  | 0.176468  |
| 18386 | 10606714 | <a href="#">NM_013463</a>          | <a href="#">11605</a>     | galactosidase, alpha           | <a href="#">Gla</a>                | 0.836 | -2.275 | 0.055959   | 0.21607   |
| 18387 | 10442391 | <a href="#">ENSMUST00000097377</a> | <a href="#">100038386</a> | predicted gene, ENSMUSG0000007 | <a href="#">ENSMUSG00000073440</a> | 0.836 | -1.308 | 0.230993   | 0.501708  |
| 18388 | 10418604 | <a href="#">NM_027949</a>          | <a href="#">71838</a>     | PHD finger protein 7           | <a href="#">Phf7</a>               | 0.836 | -3.32  | 0.0122251  | 0.0778342 |
| 18389 | 10362442 |                                    |                           |                                |                                    | 0.836 | -0.708 | 0.50111    | 0.744172  |
| 18390 | 10559756 |                                    |                           |                                |                                    | 0.836 | -2.017 | 0.0823541  | 0.274479  |
| 18391 | 10369828 |                                    |                           |                                |                                    | 0.836 | -3.092 | 0.0168793  | 0.0978602 |
| 18392 | 10394394 | <a href="#">NM_009693</a>          | <a href="#">238055</a>    | apolipoprotein B               | <a href="#">Apob</a>               | 0.836 | -2.325 | 0.0519563  | 0.206172  |
| 18393 | 10526961 | <a href="#">NM_010757</a>          | <a href="#">17135</a>     | v-maf musculoaponeurotic fibro | <a href="#">Mafk</a>               | 0.836 | -2.337 | 0.051013   | 0.203744  |
| 18394 | 10475610 | <a href="#">NM_023595</a>          | <a href="#">110074</a>    | deoxyuridine triphosphatase    | <a href="#">Dut</a>                | 0.836 | -3.974 | 0.00505249 | 0.0416166 |
| 18395 | 10514083 | <a href="#">NM_009887</a>          | <a href="#">12622</a>     | cerberus 1 homolog (Xenopus la | <a href="#">Cer1</a>               | 0.836 | -2.465 | 0.0421523  | 0.179691  |
| 18396 | 10520187 | <a href="#">NM_009207</a>          | <a href="#">20535</a>     | solute carrier family 4 (anion | <a href="#">Slc4a2</a>             | 0.836 | -3.526 | 0.00919549 | 0.063936  |
| 18397 | 10575095 | <a href="#">NM_008217</a>          | <a href="#">15118</a>     | hyaluronan synthase 3          | <a href="#">Has3</a>               | 0.836 | -3.637 | 0.00790144 | 0.0575105 |
| 18398 | 10446224 | <a href="#">NM_177638</a>          | <a href="#">224912</a>    | crumbs homolog 3 (Drosophila)  | <a href="#">Crb3</a>               | 0.836 | -3.886 | 0.00566572 | 0.0452113 |
| 18399 | 10398308 | <a href="#">ENSMUST00000047115</a> | <a href="#">212198</a>    | WD repeat domain 25            | <a href="#">Wdr25</a>              | 0.836 | -1.862 | 0.10364    | 0.316489  |
| 18400 | 10575926 | <a href="#">EF688288</a>           | <a href="#">69047</a>     | ATPase, Ca++ transporting, typ | <a href="#">Atp2c2</a>             | 0.836 | -2.524 | 0.0386038  | 0.16991   |
| 18401 | 10486875 | <a href="#">NM_172673</a>          | <a href="#">228564</a>    | FERM domain containing 5       | <a href="#">Frmf5</a>              | 0.836 | -1.902 | 0.0976841  | 0.304546  |
| 18402 | 10562105 | <a href="#">NM_008085</a>          | <a href="#">14447</a>     | glyceraldehyde-3-phosphate deh | <a href="#">Gapdhs</a>             | 0.836 | -2.8   | 0.0257178  | 0.129873  |
| 18403 | 10463670 | <a href="#">NM_053196</a>          | <a href="#">94779</a>     | sideroflexin 2                 | <a href="#">Sfxn2</a>              | 0.836 | -3.246 | 0.0135552  | 0.0839771 |

|       |          |                                    |                           |                                |                               |       |        |            |           |
|-------|----------|------------------------------------|---------------------------|--------------------------------|-------------------------------|-------|--------|------------|-----------|
| 18404 | 10437813 | <a href="#">ENSMUST00000082339</a> | <a href="#">100048925</a> | predicted gene, EG622757       | <a href="#">EG622757</a>      | 0.836 | -1.424 | 0.196111   | 0.45647   |
| 18405 | 10509838 | <a href="#">NM_008812</a>          | <a href="#">18600</a>     | peptidyl arginine deiminase, t | <a href="#">Padi2</a>         | 0.836 | -2.895 | 0.0223964  | 0.118063  |
| 18406 | 10402835 | <a href="#">NM_025399</a>          | <a href="#">66174</a>     | nudix (nucleoside diphosphate  | <a href="#">Nudt14</a>        | 0.835 | -2.781 | 0.0264428  | 0.132021  |
| 18407 | 10589927 |                                    |                           |                                |                               | 0.835 | -1.374 | 0.2105     | 0.475962  |
| 18408 | 10561306 | <a href="#">NM_011116</a>          | <a href="#">18807</a>     | phospholipase D family, member | <a href="#">Pld3</a>          | 0.835 | -2.635 | 0.0327993  | 0.152386  |
| 18409 | 10467091 | <a href="#">NM_026487</a>          | <a href="#">67979</a>     | ATPase family, AAA domain cont | <a href="#">Atad1</a>         | 0.835 | -2.523 | 0.038686   | 0.170092  |
| 18410 | 10434743 |                                    |                           |                                |                               | 0.835 | -2.483 | 0.0410392  | 0.17662   |
| 18411 | 10504008 | <a href="#">NM_029814</a>          | <a href="#">76959</a>     | chromatin modifying protein 5  | <a href="#">Chmp5</a>         | 0.835 | -4.238 | 0.00359872 | 0.0324929 |
| 18412 | 10586907 | <a href="#">NM_008613</a>          | <a href="#">17427</a>     | meiosis-specific nuclear struc | <a href="#">Mns1</a>          | 0.835 | -2.664 | 0.0314074  | 0.148244  |
| 18413 | 10460831 |                                    |                           |                                |                               | 0.835 | -0.7   | 0.505596   | 0.747576  |
| 18414 | 10599321 | <a href="#">NM_020256</a>          | <a href="#">56805</a>     | zinc finger and BTB domain con | <a href="#">Zbtb33</a>        | 0.835 | -2.355 | 0.0496692  | 0.200281  |
| 18415 | 10465686 | <a href="#">NM_001003934</a>       | <a href="#">20168</a>     | reticulon 3                    | <a href="#">Rtn3</a>          | 0.835 | -3.877 | 0.00573389 | 0.0455152 |
| 18416 | 10551865 | <a href="#">NM_198027</a>          | <a href="#">233065</a>    | alkB, alkylation repair homolo | <a href="#">Alkbh6</a>        | 0.835 | -1.655 | 0.140691   | 0.379507  |
| 18417 | 10378763 |                                    |                           |                                |                               | 0.835 | -2.941 | 0.0209772  | 0.11338   |
| 18418 | 10457938 |                                    |                           |                                |                               | 0.835 | -2.006 | 0.083708   | 0.2772    |
| 18419 | 10401050 | <a href="#">XR_032933</a>          | <a href="#">665957</a>    | similar to high mobility group | <a href="#">LOC665957</a>     | 0.835 | -2.155 | 0.0670095  | 0.241742  |
| 18420 | 10498593 | <a href="#">ENSMUST00000116062</a> | <a href="#">208424</a>    | gene model 412, (NCBI)         | <a href="#">Gm412</a>         | 0.835 | -1.308 | 0.230872   | 0.501612  |
| 18421 | 10492598 | <a href="#">NM_133787</a>          | <a href="#">97112</a>     | NMD3 homolog (S. cerevisiae)   | <a href="#">Nmd3</a>          | 0.835 | -2.875 | 0.0230764  | 0.120761  |
| 18422 | 10345200 |                                    |                           |                                |                               | 0.835 | -2.699 | 0.0298116  | 0.142998  |
| 18423 | 10463158 | <a href="#">BC116837</a>           | <a href="#">226118</a>    | expressed sequence AI606181    | <a href="#">AI606181</a>      | 0.835 | -1.921 | 0.0950128  | 0.299665  |
| 18424 | 10552917 | <a href="#">BC100502</a>           | <a href="#">76713</a>     | RIKEN cDNA 1700039E15 gene     | <a href="#">1700039E15Rik</a> | 0.835 | -3.007 | 0.0190619  | 0.106204  |
| 18425 | 10442285 | <a href="#">XM_001478718</a>       | <a href="#">383218</a>    | predicted gene, EG383218       | <a href="#">EG383218</a>      | 0.835 | -2.779 | 0.0265316  | 0.132276  |
| 18426 | 10556940 | <a href="#">NM_025899</a>          | <a href="#">67003</a>     | ubiquinol cytochrome c reducta | <a href="#">Uqcrc2</a>        | 0.835 | -5.091 | 0.00129121 | 0.0158118 |
| 18427 | 10372005 | <a href="#">NM_172538</a>          | <a href="#">215008</a>    | vezatin, adherens junctions tr | <a href="#">Vezt</a>          | 0.835 | -2.07  | 0.0760539  | 0.261237  |
| 18428 | 10446220 |                                    |                           |                                |                               | 0.835 | -2.901 | 0.0222112  | 0.117349  |
| 18429 | 10585721 | <a href="#">NM_022813</a>          | <a href="#">24044</a>     | secretory carrier membrane pro | <a href="#">Scamp2</a>        | 0.835 | -3.733 | 0.00694031 | 0.0521856 |
| 18430 | 10418917 | <a href="#">ENSMUST00000052126</a> | <a href="#">69134</a>     | RIKEN cDNA 2200001I15 gene     | <a href="#">2200001I15Rik</a> | 0.835 | -2.054 | 0.0778314  | 0.265345  |
| 18431 | 10446587 | <a href="#">ENSMUST00000097289</a> | <a href="#">77533</a>     | RIKEN cDNA C030034I22 gene     | <a href="#">C030034I22Rik</a> | 0.835 | -1.681 | 0.135318   | 0.370761  |
| 18432 | 10360053 | <a href="#">NM_025557</a>          | <a href="#">66425</a>     | Purkinje cell protein 4-like 1 | <a href="#">Pcp4l1</a>        | 0.835 | -1.072 | 0.318289   | 0.595501  |
| 18433 | 10436590 | <a href="#">AK148800</a>           | <a href="#">77994</a>     | RIKEN cDNA 2810055G20 gene     | <a href="#">2810055G20Rik</a> | 0.834 | -1.395 | 0.204495   | 0.467724  |
| 18434 | 10421723 | <a href="#">NM_025384</a>          | <a href="#">66148</a>     | DnaJ (Hsp40) homolog, subfamil | <a href="#">Dnajc15</a>       | 0.834 | -2.643 | 0.032409   | 0.151237  |
| 18435 | 10374043 | <a href="#">NM_023816</a>          | <a href="#">76389</a>     | ankyrin repeat domain 36       | <a href="#">Ankrd36</a>       | 0.834 | -2.949 | 0.020733   | 0.112665  |
| 18436 | 10603567 | <a href="#">NM_025975</a>          | <a href="#">67117</a>     | dynein light chain Tctex-type  | <a href="#">Dynlt3</a>        | 0.834 | -3.449 | 0.01022    | 0.0690169 |
| 18437 | 10498651 | <a href="#">ENSMUST00000091052</a> | <a href="#">19952</a>     | ribosomal protein L32, pseudog | <a href="#">Rpl32-ps</a>      | 0.834 | -2.323 | 0.0520919  | 0.206415  |
| 18438 | 10408251 | <a href="#">NM_177016</a>          | <a href="#">319848</a>    | solute carrier family 17 (sodi | <a href="#">Slc17a4</a>       | 0.834 | -1.79  | 0.115293   | 0.337519  |
| 18439 | 10507589 |                                    |                           |                                |                               | 0.834 | -3.765 | 0.00665398 | 0.0506729 |
| 18440 | 10537828 | <a href="#">NM_146369</a>          | <a href="#">258366</a>    | olfactory receptor 434         | <a href="#">Olf434</a>        | 0.834 | -1.378 | 0.209582   | 0.474666  |
| 18441 | 10349832 | <a href="#">XR_033420</a>          | <a href="#">638636</a>    | similar to ribosomal protein S | <a href="#">LOC638636</a>     | 0.834 | -2.267 | 0.0566679  | 0.217694  |
| 18442 | 10385335 |                                    |                           |                                |                               | 0.834 | -3.04  | 0.0181691  | 0.102596  |
| 18443 | 10431962 | <a href="#">NM_008902</a>          | <a href="#">19011</a>     | placental protein 11 related   | <a href="#">Pp11r</a>         | 0.834 | -2.621 | 0.03348    | 0.154358  |
| 18444 | 10482073 |                                    |                           |                                |                               | 0.834 | -2.08  | 0.0749325  | 0.25894   |
| 18445 | 10419158 | <a href="#">NM_001011876</a>       | <a href="#">630952</a>    | angiogenin, ribonuclease A fam | <a href="#">Ang6</a>          | 0.834 | -1.256 | 0.248237   | 0.521623  |
| 18446 | 10423512 | <a href="#">BC030179</a>           | <a href="#">68073</a>     | RIKEN cDNA A930016P21 gene     | <a href="#">A930016P21Rik</a> | 0.834 | -3.498 | 0.00955328 | 0.0657534 |
| 18447 | 10515220 | <a href="#">NM_010173</a>          | <a href="#">14073</a>     | fatty acid amide hydrolase     | <a href="#">Faah</a>          | 0.834 | -2.699 | 0.0298223  | 0.143017  |
| 18448 | 10395198 | <a href="#">XR_032641</a>          | <a href="#">668786</a>    | similar to tripartite motif pr | <a href="#">LOC668786</a>     | 0.834 | -2.94  | 0.0209965  | 0.113397  |
| 18449 | 10592084 | <a href="#">NM_009178</a>          | <a href="#">20443</a>     | ST3 beta-galactoside alpha-2,3 | <a href="#">St3gal4</a>       | 0.834 | -2.516 | 0.0390861  | 0.171282  |
| 18450 | 10407012 | <a href="#">NM_026075</a>          | <a href="#">67288</a>     | SFRS12-interacting protein 1   | <a href="#">Sfrs12ip1</a>     | 0.834 | -3.422 | 0.0106051  | 0.0707361 |
| 18451 | 10364331 | <a href="#">BC061019</a>           | <a href="#">75188</a>     | RIKEN cDNA 1700009J07 gene     | <a href="#">1700009J07Rik</a> | 0.834 | -1.453 | 0.188307   | 0.446362  |
| 18452 | 10439208 | <a href="#">NM_133704</a>          | <a href="#">317717</a>    | SEC22 vesicle trafficking prot | <a href="#">Sec22a</a>        | 0.834 | -2.8   | 0.0257152  | 0.129873  |
| 18453 | 10389842 | <a href="#">NM_001013375</a>       | <a href="#">217109</a>    | UTP18, small subunit (SSU) pro | <a href="#">Utp18</a>         | 0.834 | -3.499 | 0.00953352 | 0.065703  |
| 18454 | 10578393 | <a href="#">NM_177742</a>          | <a href="#">244448</a>    | tripartite motif family-like 1 | <a href="#">Triml1</a>        | 0.834 | -1.714 | 0.129046   | 0.360251  |
| 18455 | 10392881 | <a href="#">NM_007997</a>          | <a href="#">14149</a>     | ferredoxin reductase           | <a href="#">Fdxr</a>          | 0.834 | -2.64  | 0.0325424  | 0.151569  |
| 18456 | 10558508 | <a href="#">NM_001098636</a>       | <a href="#">101631</a>    | PWWP domain containing 2B      | <a href="#">Pwwp2b</a>        | 0.834 | -2.355 | 0.0496999  | 0.200281  |
| 18457 | 10416200 | <a href="#">NM_190598</a>          | <a href="#">72540</a>     | receptor accessory protein 4   | <a href="#">Rapad1</a>        | 0.834 | -2.220 | 0.0136800  | 0.0845285 |

|       |          |                                    |                           |                                   |                                    |       |        |            |           |
|-------|----------|------------------------------------|---------------------------|-----------------------------------|------------------------------------|-------|--------|------------|-----------|
| 18457 | 10410270 | <a href="#">NM_160566</a>          | <a href="#">72377</a>     | receptor accessory protein 4      | <a href="#">Recept4</a>            | 0.834 | -3.237 | 0.0130877  | 0.0645363 |
| 18458 | 10483110 | <a href="#">NM_027835</a>          | <a href="#">71586</a>     | interferon induced with helica    | <a href="#">Ifih1</a>              | 0.834 | -2.378 | 0.0479826  | 0.195456  |
| 18459 | 10544348 | <a href="#">NM_022413</a>          | <a href="#">64177</a>     | transient receptor potential c    | <a href="#">Trpv6</a>              | 0.834 | -1.593 | 0.153949   | 0.398469  |
| 18460 | 10488912 | <a href="#">NM_145537</a>          | <a href="#">108687</a>    | ER degradation enhancer, manno    | <a href="#">Edem2</a>              | 0.834 | -4.164 | 0.00395148 | 0.0346513 |
| 18461 | 10457963 | <a href="#">NM_001025381</a>       | <a href="#">574402</a>    | G protein-coupled receptor 17     | <a href="#">Gpr17</a>              | 0.834 | -1.841 | 0.106999   | 0.322599  |
| 18462 | 10462697 |                                    |                           |                                   |                                    | 0.834 | -1.679 | 0.135749   | 0.371508  |
| 18463 | 10537123 | <a href="#">ENSMUST00000070189</a> | <a href="#">74354</a>     | leucine-rich repeats and guany    | <a href="#">Lrguk</a>              | 0.834 | -1.767 | 0.119285   | 0.34536   |
| 18464 | 10514313 | <a href="#">NM_206867</a>          | <a href="#">230398</a>    | predicted gene,<br>OTTMUSG0000001 | <a href="#">OTTMUSG00000011275</a> | 0.834 | -1.56  | 0.161455   | 0.409623  |
| 18465 | 10466779 | <a href="#">NM_008846</a>          | <a href="#">18719</a>     | phosphatidylinositol-4-phospha    | <a href="#">Pip5k1b</a>            | 0.834 | -1.738 | 0.12446    | 0.35337   |
| 18466 | 10563411 | <a href="#">NM_153419</a>          | <a href="#">101612</a>    | glutamate-rich WD repeat conta    | <a href="#">Grwd1</a>              | 0.833 | -3.685 | 0.0074108  | 0.0549418 |
| 18467 | 10364371 |                                    |                           |                                   |                                    | 0.833 | -1.875 | 0.101756   | 0.312541  |
| 18468 | 10558936 | <a href="#">NM_001025103</a>       | <a href="#">213573</a>    | EF-hand calcium binding domain    | <a href="#">Efcab4a</a>            | 0.833 | -2.264 | 0.0568926  | 0.218163  |
| 18469 | 10361642 | <a href="#">NM_172784</a>          | <a href="#">237253</a>    | low density lipoprotein recept    | <a href="#">Lrp11</a>              | 0.833 | -2.09  | 0.0738105  | 0.256746  |
| 18470 | 10453715 | <a href="#">BC056351</a>           | <a href="#">19330</a>     | RAB18, member RAS oncogene<br>fam | <a href="#">Rab18</a>              | 0.833 | -1.989 | 0.0858572  | 0.28119   |
| 18471 | 10529661 | <a href="#">NM_029162</a>          | <a href="#">75079</a>     | zinc finger protein 509           | <a href="#">Zfp509</a>             | 0.833 | -2.578 | 0.0356391  | 0.16081   |
| 18472 | 10571728 | <a href="#">NM_203507</a>          | <a href="#">192174</a>    | RWD domain containing 4A          | <a href="#">Rwdd4a</a>             | 0.833 | -3.121 | 0.0161986  | 0.0952457 |
| 18473 | 10477854 | <a href="#">NM_013510</a>          | <a href="#">13821</a>     | erythrocyte protein band 4.1-l    | <a href="#">Epb4.111</a>           | 0.833 | -4.331 | 0.00319927 | 0.0299713 |
| 18474 | 10556413 | <a href="#">AB359922</a>           | <a href="#">70877</a>     | MICAL C-terminal like             | <a href="#">Micalc1</a>            | 0.833 | -2.017 | 0.0822985  | 0.274433  |
| 18475 | 10449575 | <a href="#">NM_026845</a>          | <a href="#">68816</a>     | peptidylprolyl isomerase (cycl    | <a href="#">Ppil1</a>              | 0.833 | -3.988 | 0.00495921 | 0.0410723 |
| 18476 | 10349771 | <a href="#">ENSMUST00000116023</a> | <a href="#">638532</a>    | predicted gene, EG638532          | <a href="#">EG638532</a>           | 0.833 | -1.998 | 0.0847186  | 0.279408  |
| 18477 | 10521331 | <a href="#">BC116928</a>           | <a href="#">403174</a>    | RIKEN cDNA A930005I04 gene        | <a href="#">A930005I04Rik</a>      | 0.833 | -1.372 | 0.211212   | 0.476809  |
| 18478 | 10582474 | <a href="#">NM_145606</a>          | <a href="#">234852</a>    | chromatin modifying protein 1A    | <a href="#">Chmp1a</a>             | 0.833 | -2.158 | 0.0666509  | 0.241189  |
| 18479 | 10538275 | <a href="#">NM_010903</a>          | <a href="#">18025</a>     | nuclear factor, erythroid deri    | <a href="#">Nfe2l3</a>             | 0.833 | -3.33  | 0.0120585  | 0.077029  |
| 18480 | 10521757 |                                    |                           |                                   |                                    | 0.833 | -1.616 | 0.148796   | 0.391099  |
| 18481 | 10574163 | <a href="#">ENSMUST00000098489</a> | <a href="#">102084</a>    | expressed sequence AI451557       | <a href="#">AI451557</a>           | 0.833 | -1.39  | 0.206036   | 0.4701    |
| 18482 | 10494643 | <a href="#">NM_008256</a>          | <a href="#">15360</a>     | 3-hydroxy-3-methylglutaryl-Coe    | <a href="#">Hmgs2</a>              | 0.833 | -2.943 | 0.0209151  | 0.113291  |
| 18483 | 10510910 | <a href="#">AK140029</a>           | <a href="#">100038561</a> | predicted gene,<br>ENSMUSG0000007 | <a href="#">ENSMUSG00000073693</a> | 0.833 | -2.452 | 0.0430003  | 0.182022  |
| 18484 | 10525731 |                                    |                           |                                   |                                    | 0.833 | -1.97  | 0.0882866  | 0.286405  |
| 18485 | 10599776 | <a href="#">NM_009766</a>          | <a href="#">12209</a>     | bombesin-like receptor 3          | <a href="#">Brs3</a>               | 0.833 | -1.281 | 0.239722   | 0.512764  |
| 18486 | 10374115 | <a href="#">AK080521</a>           | <a href="#">791363</a>    | predicted gene,<br>ENSMUSG0000005 | <a href="#">ENSMUSG00000053792</a> | 0.833 | -2.27  | 0.0563693  | 0.21702   |
| 18487 | 10359713 | <a href="#">NM_145512</a>          | <a href="#">108735</a>    | SFT2 domain containing 2          | <a href="#">Sft2d2</a>             | 0.833 | -2.069 | 0.0761261  | 0.261385  |
| 18488 | 10389670 | <a href="#">NM_146413</a>          | <a href="#">258408</a>    | olfactory receptor 463            | <a href="#">Olfr463</a>            | 0.833 | -2.069 | 0.0761735  | 0.261455  |
| 18489 | 10570827 | <a href="#">NM_020560</a>          | <a href="#">57312</a>     | mitochondrial ribosomal protei    | <a href="#">Mrps31</a>             | 0.833 | -2.973 | 0.0200098  | 0.109893  |
| 18490 | 10469559 | <a href="#">NM_029619</a>          | <a href="#">76467</a>     | methionine sulfoxide reductase    | <a href="#">Msrb2</a>              | 0.833 | -2.534 | 0.0380592  | 0.168493  |
| 18491 | 10573490 | <a href="#">NM_133255</a>          | <a href="#">170833</a>    | hook homolog 2 (Drosophila)       | <a href="#">Hook2</a>              | 0.833 | -3.938 | 0.00529599 | 0.043019  |
| 18492 | 10374035 | <a href="#">NM_013842</a>          | <a href="#">22433</a>     | X-box binding protein 1           | <a href="#">Xbp1</a>               | 0.833 | -2.68  | 0.0306641  | 0.145769  |
| 18493 | 10386518 | <a href="#">NM_145427</a>          | <a href="#">246782</a>    | ATP synthase mitochondrial F1     | <a href="#">Atpaf2</a>             | 0.833 | -2.848 | 0.0240046  | 0.123854  |
| 18494 | 10497296 | <a href="#">NM_001010834</a>       | <a href="#">241877</a>    | solute carrier family 10 (sodi    | <a href="#">Slc10a5</a>            | 0.833 | -1.665 | 0.13862    | 0.376676  |
| 18495 | 10356859 | <a href="#">NM_001105667</a>       | <a href="#">21915</a>     | deoxythymidylate kinase           | <a href="#">Dtymk</a>              | 0.832 | -3.083 | 0.0170941  | 0.0987125 |
| 18496 | 10552125 | <a href="#">NM_008820</a>          | <a href="#">18624</a>     | peptidase D                       | <a href="#">Pepd</a>               | 0.832 | -1.982 | 0.0867524  | 0.283113  |
| 18497 | 10533734 | <a href="#">NM_019875</a>          | <a href="#">56325</a>     | ATP-binding cassette, sub-fami    | <a href="#">Abcb9</a>              | 0.832 | -1.89  | 0.0994885  | 0.30816   |
| 18498 | 10603151 | <a href="#">NM_023122</a>          | <a href="#">14758</a>     | glycoprotein m6b                  | <a href="#">Gpm6b</a>              | 0.832 | -3.264 | 0.0132237  | 0.0825934 |
| 18499 | 10527886 | <a href="#">AK162341</a>           | <a href="#">67210</a>     | GATA zinc finger domain contai    | <a href="#">Gatad1</a>             | 0.832 | -1.9   | 0.098046   | 0.305404  |
| 18500 | 10368875 | <a href="#">NM_001034858</a>       | <a href="#">213402</a>    | armadillo repeat containing 2     | <a href="#">Armc2</a>              | 0.832 | -1.77  | 0.118829   | 0.344323  |
| 18501 | 10599604 | <a href="#">NM_001034059</a>       | <a href="#">434778</a>    | RIKEN cDNA 6330534C20<br>gene     | <a href="#">6330534C20Rik</a>      | 0.832 | -3.251 | 0.0134677  | 0.0836057 |
| 18502 | 10478447 | <a href="#">NM_021420</a>          | <a href="#">58231</a>     | serine/threonine kinase 4         | <a href="#">Stk4</a>               | 0.832 | -3.23  | 0.0138764  | 0.0854159 |
| 18503 | 10352499 |                                    |                           |                                   |                                    | 0.832 | -1.728 | 0.126369   | 0.356023  |
| 18504 | 10517060 | <a href="#">NM_010948</a>          | <a href="#">18221</a>     | nuclear distribution gene C ho    | <a href="#">Nudc</a>               | 0.832 | -2.384 | 0.047536   | 0.194147  |
| 18505 | 10394770 | <a href="#">NM_013614</a>          | <a href="#">18263</a>     | ornithine decarboxylase, struc    | <a href="#">Odc1</a>               | 0.832 | -3.018 | 0.0187645  | 0.105129  |
| 18506 | 10540213 |                                    |                           |                                   |                                    | 0.832 | -2.227 | 0.0601572  | 0.226087  |
| 18507 | 10539159 | <a href="#">NM_019879</a>          | <a href="#">56451</a>     | succinate-CoA ligase, GDP-form    | <a href="#">Suclg1</a>             | 0.832 | -5.012 | 0.00141373 | 0.0167368 |
| 18508 | 10452867 | <a href="#">NM_024428</a>          | <a href="#">66310</a>     | dpy-30 homolog (C. elegans)       | <a href="#">Dpy30</a>              | 0.832 | -2.804 | 0.0255855  | 0.129436  |
| 18509 | 10523060 | <a href="#">ENSMUST00000068250</a> | <a href="#">791294</a>    | predicted gene,                   | <a href="#">ENSMUSG00000054945</a> | 0.832 | -1.895 | 0.0087228  | 0.306800  |

|       |          |                                    |                        |                                |                                    |       |        |            |           |
|-------|----------|------------------------------------|------------------------|--------------------------------|------------------------------------|-------|--------|------------|-----------|
| 18509 | 10525000 | <a href="#">ENSMUST00000000250</a> | <a href="#">72127</a>  | ENSMUSG0000005                 | <a href="#">ENSMUST00000000274</a> | 0.832 | -1.895 | 0.0971228  | 0.500809  |
| 18510 | 10446066 | <a href="#">ENSMUST00000070225</a> | <a href="#">320593</a> | RIKEN cDNA A230051N06 gene     | <a href="#">A230051N06Rik</a>      | 0.832 | -1.92  | 0.0951382  | 0.299747  |
| 18511 | 10565486 | <a href="#">NM_021876</a>          | <a href="#">13626</a>  | embryonic ectoderm development | <a href="#">Eed</a>                | 0.832 | -3.484 | 0.00974195 | 0.0668561 |
| 18512 | 10562548 | <a href="#">NM_011274</a>          | <a href="#">19777</a>  | expressed sequence C80913      | <a href="#">C80913</a>             | 0.832 | -4.301 | 0.0033233  | 0.0306847 |
| 18513 | 10428012 | <a href="#">NM_145852</a>          | <a href="#">252967</a> | ropporin 1-like                | <a href="#">Ropn11</a>             | 0.832 | -2.629 | 0.0330537  | 0.153299  |
| 18514 | 10355278 | <a href="#">NM_010154</a>          | <a href="#">13869</a>  | v-erb-a erythroblastic leukemi | <a href="#">ErbB4</a>              | 0.832 | -2.029 | 0.080814   | 0.271356  |
| 18515 | 10518031 | <a href="#">NM_172338</a>          | <a href="#">214063</a> | DnaJ (Hsp40) homolog, subfamil | <a href="#">Dnajc16</a>            | 0.832 | -2.658 | 0.0316955  | 0.149063  |
| 18516 | 10535502 | <a href="#">NM_146165</a>          | <a href="#">231872</a> | JTV1 gene                      | <a href="#">Jtv1</a>               | 0.832 | -3.102 | 0.0166343  | 0.0970498 |
| 18517 | 10569992 | <a href="#">XR_031532</a>          | <a href="#">674846</a> | similar to CG5323-PA           | <a href="#">LOC674846</a>          | 0.832 | -2.986 | 0.0196567  | 0.108567  |
| 18518 | 10558647 | <a href="#">NM_146954</a>          | <a href="#">258956</a> | olfactory receptor 535         | <a href="#">Olf535</a>             | 0.832 | -2.051 | 0.0782771  | 0.266177  |
| 18519 | 10499981 | <a href="#">NM_016901</a>          | <a href="#">53814</a>  | ornithine decarboxylase antizy | <a href="#">Oaz3</a>               | 0.832 | -1.964 | 0.0890759  | 0.287809  |
| 18520 | 10398338 |                                    |                        |                                |                                    | 0.832 | -1.074 | 0.317451   | 0.594727  |
| 18521 | 10502613 | <a href="#">NM_001033199</a>       | <a href="#">99709</a>  | expressed sequence AI747448    | <a href="#">AI747448</a>           | 0.832 | -1.328 | 0.224813   | 0.494893  |
| 18522 | 10488256 | <a href="#">NM_026924</a>          | <a href="#">107586</a> | ovo-like 2 (Drosophila)        | <a href="#">Ovol2</a>              | 0.832 | -4.021 | 0.00475145 | 0.0397482 |
| 18523 | 10573027 | <a href="#">NM_001081164</a>       | <a href="#">73945</a>  | OTU domain containing 4        | <a href="#">Otud4</a>              | 0.832 | -3.332 | 0.0120168  | 0.0768787 |
| 18524 | 10542021 | <a href="#">XR_034903</a>          | <a href="#">624256</a> | similar to small nuclear ribon | <a href="#">LOC624256</a>          | 0.832 | -2.24  | 0.0589853  | 0.22351   |
| 18525 | 10374350 |                                    |                        |                                |                                    | 0.832 | -1.464 | 0.185264   | 0.442974  |
| 18526 | 10434799 |                                    |                        |                                |                                    | 0.832 | -1.912 | 0.0962685  | 0.302048  |
| 18527 | 10598601 | <a href="#">ENSMUST00000057113</a> | <a href="#">385317</a> | RIKEN cDNA 4930557A04 gene     | <a href="#">4930557A04Rik</a>      | 0.832 | -4.209 | 0.00373473 | 0.0332773 |
| 18528 | 10376292 | <a href="#">ENSMUST00000071487</a> | <a href="#">73158</a>  | La ribonucleoprotein domain fa | <a href="#">Larp1</a>              | 0.832 | -3.298 | 0.0126118  | 0.079625  |
| 18529 | 10526113 | <a href="#">NM_007761</a>          | <a href="#">12909</a>  | calcitonin gene-related peptid | <a href="#">Crcp</a>               | 0.832 | -3.167 | 0.0151611  | 0.0910185 |
| 18530 | 10362937 | <a href="#">XR_033499</a>          | <a href="#">635061</a> | similar to ribosomal protein S | <a href="#">LOC635061</a>          | 0.832 | -1.661 | 0.13934    | 0.377524  |
| 18531 | 10450418 | <a href="#">NM_033478</a>          | <a href="#">114654</a> | lymphocyte antigen 6 complex,  | <a href="#">Ly6g6d</a>             | 0.831 | -1.594 | 0.153688   | 0.398233  |
| 18532 | 10555293 | <a href="#">BC115472</a>           | <a href="#">67164</a>  | RIKEN cDNA 2610209A20 gene     | <a href="#">2610209A20Rik</a>      | 0.831 | -2.062 | 0.0769765  | 0.263109  |
| 18533 | 10425226 | <a href="#">NM_145139</a>          | <a href="#">223691</a> | eukaryotic translation initiat | <a href="#">Eif3eip</a>            | 0.831 | -4.137 | 0.00408973 | 0.0355272 |
| 18534 | 10566304 | <a href="#">ENSMUST00000053743</a> | <a href="#">70980</a>  | RIKEN cDNA 4931431F19 gene     | <a href="#">4931431F19Rik</a>      | 0.831 | -1.003 | 0.348486   | 0.622153  |
| 18535 | 10535866 | <a href="#">NM_011908</a>          | <a href="#">24109</a>  | ubiquitin-like 3               | <a href="#">Ubl3</a>               | 0.831 | -3.167 | 0.0151592  | 0.0910185 |
| 18536 | 10462724 | <a href="#">ENSMUST00000025729</a> | <a href="#">74493</a>  | tankyrase, TRF1-interacting an | <a href="#">Tnks2</a>              | 0.831 | -4.321 | 0.00324276 | 0.0301848 |
| 18537 | 10448963 | <a href="#">NM_011425</a>          | <a href="#">20609</a>  | somatostatin receptor 5        | <a href="#">Sstr5</a>              | 0.831 | -1.83  | 0.108661   | 0.325457  |
| 18538 | 10449598 | <a href="#">BC116867</a>           | <a href="#">71138</a>  | RIKEN cDNA 4933413N12 gene     | <a href="#">4933413N12Rik</a>      | 0.831 | -1.714 | 0.129021   | 0.360251  |
| 18539 | 10512919 | <a href="#">NM_001033351</a>       | <a href="#">242443</a> | glutamate receptor ionotropic, | <a href="#">Grin3a</a>             | 0.831 | -1.033 | 0.335199   | 0.610757  |
| 18540 | 10422628 | <a href="#">NM_177355</a>          | <a href="#">239318</a> | phosphatidylinositol-specific  | <a href="#">Plcx3</a>              | 0.831 | -3.309 | 0.0124178  | 0.0786588 |
| 18541 | 10575630 | <a href="#">NM_130457</a>          | <a href="#">170571</a> | contactin associated protein-1 | <a href="#">Cntnap4</a>            | 0.831 | -2.22  | 0.0608049  | 0.227575  |
| 18542 | 10479736 | <a href="#">NM_025901</a>          | <a href="#">67005</a>  | polymerase (RNA) III (DNA dire | <a href="#">Polr3k</a>             | 0.831 | -2.783 | 0.0263859  | 0.13183   |
| 18543 | 10588547 | <a href="#">NM_001015507</a>       | <a href="#">321006</a> | Vpr (HIV-1) binding protein    | <a href="#">Vprbp</a>              | 0.831 | -3.335 | 0.0119637  | 0.0766545 |
| 18544 | 10514647 |                                    |                        |                                |                                    | 0.831 | -1.708 | 0.130188   | 0.362005  |
| 18545 | 10382449 | <a href="#">NM_021411</a>          | <a href="#">58222</a>  | RAB37, member of RAS oncogene  | <a href="#">Rab37</a>              | 0.831 | -1.575 | 0.158036   | 0.405065  |
| 18546 | 10598743 | <a href="#">NM_173415</a>          | <a href="#">236690</a> | nyctalopin                     | <a href="#">Nyx</a>                | 0.831 | -1.625 | 0.146867   | 0.388752  |
| 18547 | 10596575 | <a href="#">NM_029103</a>          | <a href="#">74840</a>  | arginine-rich, mutated in earl | <a href="#">Armet</a>              | 0.831 | -3.718 | 0.00708525 | 0.0531431 |
| 18548 | 10465649 | <a href="#">NM_007928</a>          | <a href="#">13728</a>  | MAP/microtubule affinity-regul | <a href="#">Mark2</a>              | 0.831 | -4.14  | 0.00407373 | 0.035447  |
| 18549 | 10396161 | <a href="#">NM_028339</a>          | <a href="#">72736</a>  | thioredoxin domain containing  | <a href="#">Txn1c1</a>             | 0.831 | -3.065 | 0.017527   | 0.100079  |
| 18550 | 10381154 | <a href="#">NM_009923</a>          | <a href="#">12799</a>  | 2',3'-cyclic nucleotide 3' pho | <a href="#">Cnp</a>                | 0.831 | -2.264 | 0.0568661  | 0.218146  |
| 18551 | 10389283 | <a href="#">NM_008498</a>          | <a href="#">16869</a>  | LIM homeobox protein 1         | <a href="#">Lhx1</a>               | 0.831 | -1.593 | 0.153881   | 0.398439  |
| 18552 | 10413949 | <a href="#">AY775400</a>           | <a href="#">67580</a>  | leucine rich repeat containing | <a href="#">Lrrc18</a>             | 0.831 | -2.914 | 0.0217978  | 0.116036  |
| 18553 | 10508269 | <a href="#">NM_030252</a>          | <a href="#">80284</a>  | cDNA sequence BC003266         | <a href="#">BC003266</a>           | 0.831 | -3.632 | 0.00795263 | 0.057744  |
| 18554 | 10583732 | <a href="#">NM_010700</a>          | <a href="#">16835</a>  | low density lipoprotein recept | <a href="#">Ldlr</a>               | 0.831 | -3.418 | 0.0106624  | 0.0710231 |
| 18555 | 10437698 | <a href="#">NM_029582</a>          | <a href="#">106200</a> | thioredoxin domain containing  | <a href="#">Txn1c1</a>             | 0.831 | -3.608 | 0.00821454 | 0.059041  |
| 18556 | 10374012 | <a href="#">NM_145216</a>          | <a href="#">75668</a>  | RAS-like, family 10, member A  | <a href="#">Ras110a</a>            | 0.831 | -2.437 | 0.0439299  | 0.184699  |
| 18557 | 10415714 | <a href="#">BC056350</a>           | <a href="#">72125</a>  | RIKEN cDNA 2600011E07 gene     | <a href="#">2600011E07Rik</a>      | 0.831 | -1.553 | 0.163086   | 0.412032  |
| 18558 | 10582811 | <a href="#">ENSMUST00000054960</a> | <a href="#">270110</a> | interferon regulatory factor 2 | <a href="#">Irf2bp2</a>            | 0.831 | -3.092 | 0.0168856  | 0.0978674 |
| 18559 | 10481135 | <a href="#">NM_013677</a>          | <a href="#">20930</a>  | surfeit gene 1                 | <a href="#">Surf1</a>              | 0.831 | -2.255 | 0.0576741  | 0.220155  |
| 18560 | 10429691 | <a href="#">BC117947</a>           | <a href="#">105732</a> | expressed sequence AA409316    | <a href="#">AA409316</a>           | 0.83  | -2.537 | 0.0379146  | 0.168193  |

|       |          |                                    |                           |                                |                                    |       |        |            |           |
|-------|----------|------------------------------------|---------------------------|--------------------------------|------------------------------------|-------|--------|------------|-----------|
| 18561 | 10532907 | <a href="#">NM_009327</a>          | <a href="#">21405</a>     | HNF1 homeobox A                | <a href="#">Hnf1a</a>              | 0.83  | -2.757 | 0.0274066  | 0.135172  |
| 18562 | 10451167 | <a href="#">NM_198167</a>          | <a href="#">224807</a>    | transmembrane protein 63b      | <a href="#">Tmem63b</a>            | 0.83  | -3.706 | 0.00720462 | 0.0537715 |
| 18563 | 10434165 | <a href="#">NM_033474</a>          | <a href="#">11877</a>     | armadillo repeat gene deleted  | <a href="#">Arvf1</a>              | 0.83  | -2.863 | 0.0234796  | 0.121889  |
| 18564 | 10419525 | <a href="#">BC119374</a>           | <a href="#">328399</a>    | RIKEN cDNA A930018M24 gene     | <a href="#">A930018M24Rik</a>      | 0.83  | -1.348 | 0.218394   | 0.486434  |
| 18565 | 10514128 | <a href="#">NM_027238</a>          | <a href="#">69863</a>     | RIKEN cDNA 1810054D07 gene     | <a href="#">1810054D07Rik</a>      | 0.83  | -2.903 | 0.0221596  | 0.117219  |
| 18566 | 10526193 |                                    |                           |                                |                                    | 0.83  | -1.803 | 0.113167   | 0.333338  |
| 18567 | 10444554 | <a href="#">NM_023557</a>          | <a href="#">70129</a>     | solute carrier family 44, memb | <a href="#">Slc44a4</a>            | 0.83  | -3.849 | 0.00594807 | 0.0467532 |
| 18568 | 10536294 | <a href="#">NM_001040611</a>       | <a href="#">170676</a>    | paternally expressed 10        | <a href="#">Peg10</a>              | 0.83  | -2.538 | 0.0378396  | 0.167978  |
| 18569 | 10366186 | <a href="#">NM_025602</a>          | <a href="#">52713</a>     | coiled-coil domain containing  | <a href="#">Ccdc59</a>             | 0.83  | -2.371 | 0.0484969  | 0.196834  |
| 18570 | 10520445 | <a href="#">NM_001037941</a>       | <a href="#">23950</a>     | DnaJ (Hsp40) homolog, subfamil | <a href="#">Dnajb6</a>             | 0.83  | -1.392 | 0.205458   | 0.469103  |
| 18571 | 10446207 | <a href="#">NM_017393</a>          | <a href="#">53895</a>     | caseinolytic peptidase, ATP-de | <a href="#">Clpp</a>               | 0.83  | -2.943 | 0.0208939  | 0.113256  |
| 18572 | 10464283 | <a href="#">ENSMUST00000071072</a> | <a href="#">791347</a>    | predicted gene, ENSMUSG0000005 | <a href="#">ENSMUSG00000056739</a> | 0.83  | -1.207 | 0.265482   | 0.540577  |
| 18573 | 10485183 | <a href="#">NM_211358</a>          | <a href="#">228368</a>    | solute carrier family 35, memb | <a href="#">Slc35c1</a>            | 0.83  | -4.164 | 0.00395425 | 0.0346513 |
| 18574 | 10506883 | <a href="#">NM_023537</a>          | <a href="#">69908</a>     | RAB3B, member RAS oncogene fam | <a href="#">Rab3b</a>              | 0.83  | -2.308 | 0.0532522  | 0.209308  |
| 18575 | 10597182 | <a href="#">ENSMUST00000093780</a> | <a href="#">235627</a>    | neurobeachin-like 2            | <a href="#">Nbeal2</a>             | 0.83  | -2.986 | 0.0196378  | 0.108498  |
| 18576 | 10466903 | <a href="#">NM_198651</a>          | <a href="#">381218</a>    | RIKEN cDNA 4430402I18 gene     | <a href="#">4430402I18Rik</a>      | 0.83  | -2.463 | 0.042278   | 0.179955  |
| 18577 | 10540287 | <a href="#">ENSMUST00000071059</a> | <a href="#">791269</a>    | predicted gene, ENSMUSG0000005 | <a href="#">ENSMUSG00000056743</a> | 0.83  | -1.721 | 0.1277     | 0.358351  |
| 18578 | 10447513 | <a href="#">ENSMUST00000097269</a> | <a href="#">100038500</a> | predicted gene, ENSMUSG0000007 | <a href="#">ENSMUSG00000073366</a> | 0.83  | -1.614 | 0.149238   | 0.391598  |
| 18579 | 10574480 | <a href="#">NM_053070</a>          | <a href="#">12354</a>     | carbonic anhydrase 7           | <a href="#">Car7</a>               | 0.83  | -2.473 | 0.0416671  | 0.178117  |
| 18580 | 10352918 | <a href="#">BC058715</a>           | <a href="#">320977</a>    | RIKEN cDNA C030002C11 gene     | <a href="#">C030002C11Rik</a>      | 0.83  | -1.217 | 0.261807   | 0.536245  |
| 18581 | 10438189 | <a href="#">NM_144852</a>          | <a href="#">224022</a>    | solute carrier family 7 (catio | <a href="#">Slc7a4</a>             | 0.83  | -1.94  | 0.092268   | 0.294344  |
| 18582 | 10396950 |                                    |                           |                                |                                    | 0.83  | -1.533 | 0.167826   | 0.419086  |
| 18583 | 10373202 | <a href="#">NM_028230</a>          | <a href="#">108037</a>    | serine hydroxymethyltransferas | <a href="#">Shmt2</a>              | 0.83  | -2.754 | 0.0275233  | 0.13559   |
| 18584 | 10355456 | <a href="#">NM_001005423</a>       | <a href="#">381269</a>    | melanoregulin                  | <a href="#">Mreg</a>               | 0.829 | -2.763 | 0.027161   | 0.134251  |
| 18585 | 10346137 | <a href="#">XR_033155</a>          | <a href="#">666909</a>    | glyceraldehyde-3-phosphate deh | <a href="#">LOC666909</a>          | 0.829 | -0.984 | 0.356879   | 0.629197  |
| 18586 | 10458226 | <a href="#">NM_010481</a>          | <a href="#">15526</a>     | heat shock protein 9           | <a href="#">Hspa9</a>              | 0.829 | -4.204 | 0.00375689 | 0.0333904 |
| 18587 | 10437804 | <a href="#">NM_011987</a>          | <a href="#">26565</a>     | phospholipase A2, group X      | <a href="#">Pla2g10</a>            | 0.829 | -2.075 | 0.0755182  | 0.259804  |
| 18588 | 10352556 | <a href="#">XR_033497</a>          | <a href="#">100042375</a> | glyceraldehyde-3-phosphate deh | <a href="#">LOC100042375</a>       | 0.829 | -1.957 | 0.0899508  | 0.289442  |
| 18589 | 10586604 | <a href="#">NM_026467</a>          | <a href="#">67941</a>     | ribosomal protein S27-like     | <a href="#">Rps27l</a>             | 0.829 | -2.831 | 0.0245772  | 0.126012  |
| 18590 | 10415065 | <a href="#">NM_022993</a>          | <a href="#">65107</a>     | low-density lipoprotein recept | <a href="#">Lrp10</a>              | 0.829 | -2.263 | 0.0570217  | 0.218378  |
| 18591 | 10417147 | <a href="#">NM_080556</a>          | <a href="#">68059</a>     | transmembrane 9 superfamily me | <a href="#">Tm9sf2</a>             | 0.829 | -3.534 | 0.00909707 | 0.0634394 |
| 18592 | 10583834 | <a href="#">BC054761</a>           | <a href="#">68283</a>     | RIKEN cDNA 9530077C05 gene     | <a href="#">9530077C05Rik</a>      | 0.829 | -2.689 | 0.0302908  | 0.144706  |
| 18593 | 10531370 | <a href="#">NM_025972</a>          | <a href="#">67111</a>     | Nacylethanolamine acid amidase | <a href="#">Naaa</a>               | 0.829 | -3.796 | 0.0063849  | 0.0490382 |
| 18594 | 10473343 | <a href="#">NM_025885</a>          | <a href="#">381379</a>    | mediator of RNA polymerase II  | <a href="#">Med19</a>              | 0.829 | -3.922 | 0.00540855 | 0.0437317 |
| 18595 | 10540877 | <a href="#">BC091747</a>           | <a href="#">56940</a>     | phospholipase, large, P1       | <a href="#">Kplp1</a>              | 0.828 | -1.522 | 0.00864631 | 0.0519738 |
| 18596 | 10340079 | <a href="#">NM_145372</a>          | <a href="#">232493</a>    | glycogen synthase 2            | <a href="#">Gys2</a>               | 0.828 | -4.258 | 0.00356505 | 0.0519738 |
| 18597 | 10412607 | <a href="#">NM_025341</a>          | <a href="#">66082</a>     | abhydrolase domain containing  | <a href="#">Abhd6</a>              | 0.829 | -3.66  | 0.00765629 | 0.0563022 |
| 18598 | 10371390 | <a href="#">NM_010214</a>          | <a href="#">14202</a>     | four and a half LIM domains 4  | <a href="#">Fhl4</a>               | 0.829 | -1.354 | 0.216676   | 0.484036  |
| 18599 | 10391555 | <a href="#">NM_008918</a>          | <a href="#">19064</a>     | pancreatic polypeptide         | <a href="#">Ppy</a>                | 0.829 | -2.074 | 0.0756403  | 0.260013  |
| 18600 | 10552516 | <a href="#">NM_011177</a>          | <a href="#">19144</a>     | kallikrein related-peptidase 6 | <a href="#">Klk6</a>               | 0.828 | -3.602 | 0.00828506 | 0.0593818 |
| 18601 | 10519069 | <a href="#">NM_175556</a>          | <a href="#">269615</a>    | phospholipase C, eta 2         | <a href="#">Plch2</a>              | 0.828 | -1.859 | 0.104136   | 0.317316  |
| 18602 | 10376787 | <a href="#">NM_013717</a>          | <a href="#">27078</a>     | B9 protein domain 1            | <a href="#">B9d1</a>               | 0.828 | -4.779 | 0.00185473 | 0.020404  |
| 18603 | 10384398 | <a href="#">NM_010345</a>          | <a href="#">14783</a>     | growth factor receptor bound p | <a href="#">Grb10</a>              | 0.828 | -5.223 | 0.00111162 | 0.0141204 |
| 18604 | 10451613 | <a href="#">NM_001110824</a>       | <a href="#">74123</a>     | forkhead box P4                | <a href="#">Foxp4</a>              | 0.828 | -3.088 | 0.0169623  | 0.0981528 |
| 18605 | 10566452 | <a href="#">XR_032323</a>          | <a href="#">100046114</a> | similar to HBxAg transactivate | <a href="#">LOC100046114</a>       | 0.828 | -2.223 | 0.0604664  | 0.226805  |
| 18606 | 10374313 |                                    |                           |                                |                                    | 0.828 | -2.36  | 0.0493103  | 0.199391  |
| 18607 | 10467493 | <a href="#">NM_026260</a>          | <a href="#">67590</a>     | tectonic family member 3       | <a href="#">Tctn3</a>              | 0.828 | -2.497 | 0.0402274  | 0.174515  |
| 18608 | 10407124 | <a href="#">ENSMUST00000099179</a> | <a href="#">105178</a>    | expressed sequence AI452195    | <a href="#">AI452195</a>           | 0.828 | -1.752 | 0.122046   | 0.349051  |
| 18609 | 10351035 | <a href="#">NR_002840</a>          | <a href="#">14455</a>     | growth arrest specific 5       | <a href="#">Gas5</a>               | 0.828 | -2.129 | 0.0696343  | 0.247355  |
| 18610 | 10450226 | <a href="#">NM_019441</a>          | <a href="#">54397</a>     | palmitoyl-protein thioesterase | <a href="#">Ppt2</a>               | 0.828 | -1.855 | 0.104822   | 0.318763  |

|       |          |                                    |                           |                                |                               |       |        |            |           |
|-------|----------|------------------------------------|---------------------------|--------------------------------|-------------------------------|-------|--------|------------|-----------|
| 18611 | 10547075 | <a href="#">BC060267</a>           | <a href="#">212516</a>    | cDNA sequence BC060267         | <a href="#">BC060267</a>      | 0.828 | -2.868 | 0.0233167  | 0.121319  |
| 18612 | 10504621 | <a href="#">ENSMUST00000043958</a> | <a href="#">381522</a>    | RIKEN cDNA E230008N13 gene     | <a href="#">E230008N13Rik</a> | 0.828 | -2.544 | 0.0374777  | 0.166652  |
| 18613 | 10584124 | <a href="#">NM_177379</a>          | <a href="#">330914</a>    | Rho GTPase-activating protein  | <a href="#">Grit</a>          | 0.828 | -2.134 | 0.0690807  | 0.246356  |
| 18614 | 10495332 | <a href="#">BC116223</a>           | <a href="#">75504</a>     | RIKEN cDNA 1700013F07 gene     | <a href="#">1700013F07Rik</a> | 0.828 | -2.33  | 0.051559   | 0.205188  |
| 18615 | 10526261 | <a href="#">NM_016801</a>          | <a href="#">20907</a>     | syntaxin 1A (brain)            | <a href="#">Stx1a</a>         | 0.828 | -1.727 | 0.126573   | 0.356265  |
| 18616 | 10479228 | <a href="#">ENSMUST00000108926</a> | <a href="#">100125272</a> | KRAB box and zinc finger, C2H2 | <a href="#">RP24-87L14.2</a>  | 0.828 | -2.773 | 0.0267787  | 0.133145  |
| 18617 | 10593634 | <a href="#">NM_177769</a>          | <a href="#">270162</a>    | ELMO domain containing 1       | <a href="#">Elmod1</a>        | 0.828 | -2.793 | 0.025976   | 0.130584  |
| 18618 | 10483679 | <a href="#">NM_001080707</a>       | <a href="#">68526</a>     | G protein-coupled receptor 155 | <a href="#">Gpr155</a>        | 0.828 | -2.151 | 0.0673507  | 0.242464  |
| 18619 | 10578189 | <a href="#">XR_030714</a>          | <a href="#">676031</a>    | similar to chromodomain helica | <a href="#">LOC676031</a>     | 0.828 | -2.669 | 0.0311737  | 0.147467  |
| 18620 | 10456405 | <a href="#">NM_144867</a>          | <a href="#">225655</a>    | slowmo homolog 1 (Drosophila)  | <a href="#">Slmol1</a>        | 0.828 | -1.716 | 0.128611   | 0.359531  |
| 18621 | 10597273 | <a href="#">NM_153100</a>          | <a href="#">235636</a>    | receptor transporter protein 3 | <a href="#">Rtp3</a>          | 0.827 | -3.613 | 0.00815932 | 0.0587204 |
| 18622 | 10399908 | <a href="#">NM_011158</a>          | <a href="#">19088</a>     | protein kinase, cAMP dependent | <a href="#">Prkar2b</a>       | 0.827 | -4.104 | 0.00426752 | 0.0365593 |
| 18623 | 10402988 |                                    |                           |                                |                               | 0.827 | -1.138 | 0.291317   | 0.567423  |
| 18624 | 10548000 | <a href="#">NM_010736</a>          | <a href="#">17000</a>     | lymphotoxin B receptor         | <a href="#">Ltbr</a>          | 0.827 | -2.418 | 0.0452182  | 0.188022  |
| 18625 | 10443730 | <a href="#">NM_009593</a>          | <a href="#">11307</a>     | ATP-binding cassette, sub-fami | <a href="#">Abcg1</a>         | 0.827 | -3.154 | 0.0154468  | 0.0923141 |
| 18626 | 10453373 | <a href="#">NM_145984</a>          | <a href="#">213760</a>    | prolyl endopeptidase-like      | <a href="#">Prepl</a>         | 0.827 | -3.813 | 0.00624289 | 0.0482985 |
| 18627 | 10501909 | <a href="#">BC052204</a>           | <a href="#">210529</a>    | RIKEN cDNA G430022H21 gene     | <a href="#">G430022H21Rik</a> | 0.827 | -3.421 | 0.0106262  | 0.0708545 |
| 18628 | 10439471 | <a href="#">NM_172380</a>          | <a href="#">224143</a>    | KTEL (Lys-Tyr-Glu-Leu) contain | <a href="#">Ktelc1</a>        | 0.827 | -2.78  | 0.026488   | 0.132152  |
| 18629 | 10424756 | <a href="#">NM_177922</a>          | <a href="#">332110</a>    | mitogen-activated protein kina | <a href="#">Mapk15</a>        | 0.827 | -2.042 | 0.0792443  | 0.26804   |
| 18630 | 10450614 | <a href="#">NM_001033630</a>       | <a href="#">69662</a>     | RIKEN cDNA 2310061104 gene     | <a href="#">2310061104Rik</a> | 0.827 | -4.027 | 0.00471514 | 0.039535  |
| 18631 | 10500181 | <a href="#">XR_051134</a>          | <a href="#">277589</a>    | hypothetical gene supported by | <a href="#">LOC277589</a>     | 0.827 | -2.646 | 0.0322555  | 0.150768  |
| 18632 | 10492193 |                                    |                           |                                |                               | 0.827 | -2.153 | 0.0671304  | 0.241908  |
| 18633 | 10602795 | <a href="#">NM_025437</a>          | <a href="#">66235</a>     | eukaryotic translation initiat | <a href="#">Eif1ay</a>        | 0.827 | -4.601 | 0.00229511 | 0.0240237 |
| 18634 | 10382713 | <a href="#">NM_001005608</a>       | <a href="#">192897</a>    | integrin beta 4                | <a href="#">Itgb4</a>         | 0.827 | -2.61  | 0.0340286  | 0.15604   |
| 18635 | 10475362 | <a href="#">NM_030234</a>          | <a href="#">241627</a>    | WD repeat domain 76            | <a href="#">Wdr76</a>         | 0.827 | -2.932 | 0.0212415  | 0.11408   |
| 18636 | 10486712 | <a href="#">ENSMUST00000110661</a> | <a href="#">99334</a>     | zinc finger SCAN domains 29    | <a href="#">Zscan29</a>       | 0.827 | -3.974 | 0.00504833 | 0.0415985 |
| 18637 | 10431208 |                                    |                           |                                |                               | 0.827 | -1.802 | 0.113298   | 0.33346   |
| 18638 | 10507309 | <a href="#">NM_001037916</a>       | <a href="#">622665</a>    | coiled-coil domain containing  | <a href="#">RP23-233B9.8</a>  | 0.827 | -2.569 | 0.036132   | 0.162237  |
| 18639 | 10399352 |                                    |                           |                                |                               | 0.827 | -2.693 | 0.0300996  | 0.144118  |
| 18640 | 10396074 | <a href="#">NM_146035</a>          | <a href="#">217664</a>    | mannoside acetylglucosaminyltr | <a href="#">Mgat2</a>         | 0.827 | -3.481 | 0.00977402 | 0.0669675 |
| 18641 | 10416843 | <a href="#">NM_001033242</a>       | <a href="#">211286</a>    | ceroid-lipofuscinosis, neurona | <a href="#">Cln5</a>          | 0.826 | -3.823 | 0.00615771 | 0.0477267 |
| 18642 | 10449148 | <a href="#">NM_001100454</a>       | <a href="#">215001</a>    | WAP, FS, Ig, KU, and NTR-conta | <a href="#">Wfikkn1</a>       | 0.826 | -3.084 | 0.0170771  | 0.0986823 |
| 18643 | 10538253 | <a href="#">NM_019939</a>          | <a href="#">56524</a>     | membrane protein, palmitoylate | <a href="#">Mpp6</a>          | 0.826 | -3.12  | 0.0162183  | 0.0953351 |
| 18644 | 10427468 |                                    |                           |                                |                               | 0.826 | -1.047 | 0.329061   | 0.605314  |
| 18645 | 10601347 | <a href="#">NM_173436</a>          | <a href="#">245566</a>    | cysteine-rich perinuclear thec | <a href="#">Cyp2</a>          | 0.826 | -1.001 | 0.34931    | 0.622835  |
| 18646 | 10433264 | <a href="#">NM_031184</a>          | <a href="#">83396</a>     | GLIS family zinc finger 2      | <a href="#">Glis2</a>         | 0.826 | -3.959 | 0.00515317 | 0.0421829 |
| 18647 | 10512291 | <a href="#">NM_016890</a>          | <a href="#">53598</a>     | dynactin 3                     | <a href="#">Detn3</a>         | 0.826 | -3.955 | 0.00517527 | 0.0422494 |
| 18648 | 10421436 | <a href="#">NM_008004</a>          | <a href="#">14171</a>     | fibroblast growth factor 17    | <a href="#">Fgf17</a>         | 0.826 | -2.099 | 0.0728058  | 0.254321  |
| 18649 | 10516544 | <a href="#">NM_010471</a>          | <a href="#">15444</a>     | hippocalcin                    | <a href="#">Hpcal</a>         | 0.826 | -2.646 | 0.0322657  | 0.150768  |
| 18650 | 10584271 | <a href="#">BC034160</a>           | <a href="#">66279</a>     | RIKEN cDNA 1810021J13 gene     | <a href="#">1810021J13Rik</a> | 0.826 | -5.134 | 0.00122892 | 0.0152577 |
| 18651 | 10406823 |                                    |                           |                                |                               | 0.826 | -1.824 | 0.109631   | 0.327224  |
| 18652 | 10357332 | <a href="#">NM_023735</a>          | <a href="#">74117</a>     | ARP3 actin-related protein 3 h | <a href="#">Actr3</a>         | 0.826 | -3.289 | 0.0127726  | 0.0803763 |
| 18653 | 10569358 | <a href="#">NM_008387</a>          | <a href="#">16334</a>     | insulin II                     | <a href="#">Ins2</a>          | 0.826 | -2.387 | 0.0473705  | 0.193658  |
| 18654 | 10383891 | <a href="#">NM_138948</a>          | <a href="#">192650</a>    | calcium binding protein 7      | <a href="#">Cabp7</a>         | 0.826 | -2.474 | 0.0415925  | 0.177907  |
| 18655 | 10550738 | <a href="#">ENSMUST00000094754</a> | <a href="#">243872</a>    | predicted gene, EG243872       | <a href="#">EG243872</a>      | 0.826 | -2.222 | 0.0605634  | 0.226995  |
| 18656 | 10347186 |                                    |                           |                                |                               | 0.826 | -1.387 | 0.206789   | 0.471259  |
| 18657 | 10389507 | <a href="#">NM_029478</a>          | <a href="#">75909</a>     | transmembrane protein 49       | <a href="#">Tmem49</a>        | 0.826 | -4.528 | 0.00251051 | 0.0254835 |
| 18658 | 10418480 | <a href="#">NM_153547</a>          | <a href="#">30877</a>     | guanine nucleotide binding pro | <a href="#">Gnl3</a>          | 0.826 | -4.123 | 0.00416464 | 0.0359141 |
| 18659 | 10491860 | <a href="#">NM_172303</a>          | <a href="#">269424</a>    | PHD finger protein 17          | <a href="#">Phf17</a>         | 0.826 | -3.264 | 0.0132265  | 0.0825934 |
| 18660 | 10530496 | <a href="#">NM_174877</a>          | <a href="#">317755</a>    | zygote arrest 1                | <a href="#">Zarl</a>          | 0.826 | -2.58  | 0.035577   | 0.160632  |
| 18661 | 10560592 | <a href="#">NM_019649</a>          | <a href="#">56457</a>     | cleft lip and palate associate | <a href="#">Clptm1</a>        | 0.826 | -3.334 | 0.0119926  | 0.0767701 |
| 18662 | 10414113 | <a href="#">NM_001004436</a>       | <a href="#">218914</a>    | wings apart-like homolog (Dros | <a href="#">Wapal</a>         | 0.826 | -3.394 | 0.0110343  | 0.0725916 |
| 18663 | 10440568 | <a href="#">NM_001081068</a>       | <a href="#">78913</a>     | zinc finger protein 294        | <a href="#">Zfp294</a>        | 0.825 | -1.641 | 0.143638   | 0.384296  |

|       |          |                                    |                        |                                |                               |       |        |            |           |
|-------|----------|------------------------------------|------------------------|--------------------------------|-------------------------------|-------|--------|------------|-----------|
| 18664 | 10367282 | <a href="#">NM_019953</a>          | <a href="#">56530</a>  | canopy 2 homolog (zebrafish)   | <a href="#">Cnpy2</a>         | 0.825 | -4.899 | 0.00161131 | 0.0183663 |
| 18665 | 10470390 | <a href="#">XR_033627</a>          | <a href="#">665315</a> | similar to ribosomal protein L | <a href="#">LOC665315</a>     | 0.825 | -3.089 | 0.016945   | 0.0981068 |
| 18666 | 10387723 | <a href="#">BC069874</a>           | <a href="#">70419</a>  | RIKEN cDNA 2810408A11 gene     | <a href="#">2810408A11Rik</a> | 0.825 | -3.437 | 0.0103827  | 0.0698033 |
| 18667 | 10477942 | <a href="#">U27178</a>             | <a href="#">19650</a>  | retinoblastoma-like 1 (p107)   | <a href="#">Rbl1</a>          | 0.825 | -2.675 | 0.0309165  | 0.146668  |
| 18668 | 10575840 |                                    |                        |                                |                               | 0.825 | -2.001 | 0.0843379  | 0.278694  |
| 18669 | 10466296 | <a href="#">NM_146688</a>          | <a href="#">258683</a> | olfactory receptor 262         | <a href="#">Olf262</a>        | 0.825 | -1.724 | 0.127171   | 0.35745   |
| 18670 | 10371672 | <a href="#">BC100581</a>           | <a href="#">237433</a> | predicted gene, EG237433       | <a href="#">EG237433</a>      | 0.825 | -1.73  | 0.125987   | 0.355325  |
| 18671 | 10467470 | <a href="#">NM_019698</a>          | <a href="#">56454</a>  | aldehyde dehydrogenase 18 fami | <a href="#">Aldh18a1</a>      | 0.825 | -4.345 | 0.00314511 | 0.0296612 |
| 18672 | 10423663 | <a href="#">ENSMUST00000048646</a> | <a href="#">666173</a> | vacuolar protein sorting 13B ( | <a href="#">Vps13b</a>        | 0.825 | -3.232 | 0.0138373  | 0.0852742 |
| 18673 | 10425046 | <a href="#">XR_004836</a>          | <a href="#">626711</a> | similar to heterogeneous nucle | <a href="#">LOC626711</a>     | 0.825 | -2.739 | 0.0281257  | 0.137577  |
| 18674 | 10503216 | <a href="#">NM_001081417</a>       | <a href="#">320790</a> | chromodomain helicase DNA bind | <a href="#">Chd7</a>          | 0.825 | -2.09  | 0.0737831  | 0.256746  |
| 18675 | 10434782 | <a href="#">NM_178665</a>          | <a href="#">210126</a> | LIM domain containing preferre | <a href="#">Lpp</a>           | 0.824 | -2.906 | 0.0220496  | 0.116905  |
| 18676 | 10465783 | <a href="#">NM_026325</a>          | <a href="#">67706</a>  | transmembrane protein 179B     | <a href="#">Tmem179b</a>      | 0.824 | -3.213 | 0.0142104  | 0.0868397 |
| 18677 | 10495259 | <a href="#">NM_008141</a>          | <a href="#">14686</a>  | guanine nucleotide binding pro | <a href="#">Gnat2</a>         | 0.824 | -2.75  | 0.0276721  | 0.13614   |
| 18678 | 10530140 |                                    |                        |                                |                               | 0.824 | -1.582 | 0.156404   | 0.402458  |
| 18679 | 10467907 | <a href="#">NM_145502</a>          | <a href="#">226144</a> | ER lipid raft associated 1     | <a href="#">Erlin1</a>        | 0.824 | -2.503 | 0.0398264  | 0.173591  |
| 18680 | 10433904 | <a href="#">NM_198246</a>          | <a href="#">70120</a>  | tyrosyl-tRNA synthetase 2 (mit | <a href="#">Yars2</a>         | 0.824 | -2.684 | 0.0304941  | 0.145382  |
| 18681 | 10514475 | <a href="#">ENSMUST00000049565</a> | <a href="#">319247</a> | RIKEN cDNA 9530080011 gene     | <a href="#">9530080011Rik</a> | 0.824 | -3.187 | 0.014734   | 0.0890612 |
| 18682 | 10527099 |                                    |                        |                                |                               | 0.824 | -2.283 | 0.0553083  | 0.214615  |
| 18683 | 10457606 | <a href="#">NM_134112</a>          | <a href="#">106931</a> | potassium channel tetramerisat | <a href="#">Kctd1</a>         | 0.824 | -3.124 | 0.0161258  | 0.0950038 |
| 18684 | 10526972 | <a href="#">NM_008637</a>          | <a href="#">17766</a>  | nudix (nucleoside diphosphate  | <a href="#">Nudt1</a>         | 0.824 | -2.627 | 0.0331784  | 0.153573  |
| 18685 | 10445137 | <a href="#">NM_146835</a>          | <a href="#">258832</a> | olfactory receptor 109         | <a href="#">Olf109</a>        | 0.824 | -1.579 | 0.156997   | 0.403436  |
| 18686 | 10344817 | <a href="#">NM_026493</a>          | <a href="#">211660</a> | centrosome and spindle pole as | <a href="#">Cspp1</a>         | 0.824 | -2.942 | 0.0209409  | 0.113309  |
| 18687 | 10464202 | <a href="#">NM_172840</a>          | <a href="#">240675</a> | von Willebrand factor A domain | <a href="#">Vwa2</a>          | 0.824 | -3.986 | 0.00497311 | 0.041123  |
| 18688 | 10350894 |                                    |                        |                                |                               | 0.824 | -2.656 | 0.0318018  | 0.149238  |
| 18689 | 10375432 | <a href="#">BC104394</a>           | <a href="#">320116</a> | RIKEN cDNA C030019I05 gene     | <a href="#">C030019I05Rik</a> | 0.824 | -2.895 | 0.0223955  | 0.118063  |
| 18690 | 10375463 | <a href="#">NM_134248</a>          | <a href="#">171283</a> | hepatitis A virus cellular rec | <a href="#">Havcr1</a>        | 0.824 | -1.755 | 0.121361   | 0.347955  |
| 18691 | 10586074 |                                    |                        |                                |                               | 0.824 | -1.474 | 0.182839   | 0.439611  |
| 18692 | 10500800 |                                    |                        |                                |                               | 0.824 | -1.743 | 0.123559   | 0.351666  |
| 18693 | 10509178 | <a href="#">NM_001008232</a>       | <a href="#">230837</a> | development and differentiatio | <a href="#">Ddef11</a>        | 0.824 | -3.259 | 0.0133154  | 0.082928  |
| 18694 | 10521602 | <a href="#">NM_175937</a>          | <a href="#">231207</a> | cytoplasmic polyadenylation el | <a href="#">Cpeb2</a>         | 0.824 | -4.599 | 0.00230271 | 0.0240437 |
| 18695 | 10603706 | <a href="#">XR_032128</a>          | <a href="#">668990</a> | similar to vitamin D receptor  | <a href="#">LOC668990</a>     | 0.823 | -0.75  | 0.476823   | 0.727649  |
| 18696 | 10574456 | <a href="#">NM_001037841</a>       | <a href="#">75458</a>  | chemokine-like factor          | <a href="#">Cklf</a>          | 0.823 | -2.969 | 0.020141   | 0.110355  |
| 18697 | 10447560 |                                    |                        |                                |                               | 0.823 | -3.157 | 0.0153909  | 0.0920839 |
| 18698 | 10441038 | <a href="#">NM_139145</a>          | <a href="#">110948</a> | holocarboxylase synthetase (bi | <a href="#">Hlcs</a>          | 0.823 | -3.235 | 0.0137839  | 0.0850347 |
| 18699 | 10466745 | <a href="#">NM_011597</a>          | <a href="#">21873</a>  | tight junction protein 2       | <a href="#">Tjp2</a>          | 0.823 | -5.07  | 0.00132245 | 0.016024  |
| 18700 | 10503206 | <a href="#">NM_001081417</a>       | <a href="#">320790</a> | chromodomain helicase DNA bind | <a href="#">Chd7</a>          | 0.823 | -3.846 | 0.00597598 | 0.0468506 |
| 18701 | 10370860 | <a href="#">NM_026094</a>          | <a href="#">67331</a>  | ATPase, class I, type 8B, memb | <a href="#">Atp8b3</a>        | 0.823 | -1.29  | 0.236965   | 0.509116  |
| 18702 | 10381379 |                                    |                        |                                |                               | 0.823 | -1.512 | 0.173038   | 0.425494  |
| 18703 | 10605392 | <a href="#">NM_007977</a>          | <a href="#">14069</a>  | coagulation factor VIII        | <a href="#">F8</a>            | 0.823 | -4.019 | 0.00476601 | 0.0397838 |
| 18704 | 10416325 | <a href="#">NM_153136</a>          | <a href="#">213484</a> | nudix (nucleoside diphosphate  | <a href="#">Nudt18</a>        | 0.823 | -2.212 | 0.0614606  | 0.22891   |
| 18705 | 10563770 | <a href="#">NM_013808</a>          | <a href="#">13009</a>  | cysteine and glycine-rich prot | <a href="#">Csrp3</a>         | 0.823 | -2.143 | 0.0681964  | 0.244108  |
| 18706 | 10484258 |                                    |                        |                                |                               | 0.823 | -2.76  | 0.0272778  | 0.134663  |
| 18707 | 10365817 | <a href="#">NM_021320</a>          | <a href="#">57764</a>  | netrin 4                       | <a href="#">Ntn4</a>          | 0.823 | -3.042 | 0.0181202  | 0.102464  |
| 18708 | 10576598 | <a href="#">BC038634</a>           | <a href="#">67892</a>  | RIKEN cDNA 1810063B05 gene     | <a href="#">1810063B05Rik</a> | 0.823 | -2.017 | 0.0823115  | 0.274433  |
| 18709 | 10382326 | <a href="#">XR_032804</a>          | <a href="#">667003</a> | similar to eukaryotic translat | <a href="#">LOC667003</a>     | 0.823 | -1.314 | 0.229234   | 0.500249  |
| 18710 | 10521174 | <a href="#">NM_011278</a>          | <a href="#">19822</a>  | ring finger protein 4          | <a href="#">Rnf4</a>          | 0.823 | -3.412 | 0.0107598  | 0.0714525 |
| 18711 | 10582303 | <a href="#">NM_007806</a>          | <a href="#">13057</a>  | cytochrome b-245, alpha polype | <a href="#">Cyba</a>          | 0.823 | -3.885 | 0.00567719 | 0.0452369 |
| 18712 | 10447412 |                                    |                        |                                |                               | 0.823 | -2.07  | 0.0760838  | 0.261283  |
| 18713 | 10405971 | <a href="#">NM_145354</a>          | <a href="#">28114</a>  | NOL1/NOP2/Sun domain family 2  | <a href="#">Nsun2</a>         | 0.823 | -4.191 | 0.003818   | 0.0337914 |
| 18714 | 10519514 | <a href="#">XR_031102</a>          | <a href="#">433840</a> | similar to ribosomal protein L | <a href="#">LOC433840</a>     | 0.823 | -2.265 | 0.0568361  | 0.218146  |
| 18715 | 10575024 | <a href="#">NM_001027800</a>       | <a href="#">12560</a>  | protein 2                      | <a href="#">Ctfr2</a>         | 0.823 | -2.701 | 0.0260605  | 0.120787  |

|       |          |                                    |                           |                                |                                    |       |        |             |           |
|-------|----------|------------------------------------|---------------------------|--------------------------------|------------------------------------|-------|--------|-------------|-----------|
| 18715 | 10575034 | <a href="#">NM_001037809</a>       | <a href="#">12500</a>     | cadherin 5                     | <a href="#">Cdn5</a>               | 0.823 | -2.791 | 0.0260005   | 0.150787  |
| 18716 | 10507520 | <a href="#">NM_026601</a>          | <a href="#">68180</a>     | hydroxypyruvate isomerase homo | <a href="#">Hyi</a>                | 0.823 | -2.535 | 0.038025    | 0.168377  |
| 18717 | 10383564 | <a href="#">NM_001038699</a>       | <a href="#">63828</a>     | fructosamine 3 kinase          | <a href="#">Fn3k</a>               | 0.823 | -1.441 | 0.191638    | 0.451022  |
| 18718 | 10543512 | <a href="#">NM_001081678</a>       | <a href="#">627049</a>    | zinc finger protein 800        | <a href="#">Zfp800</a>             | 0.823 | -3.604 | 0.00826102  | 0.0592507 |
| 18719 | 10520763 | <a href="#">NM_144909</a>          | <a href="#">231103</a>    | glucokinase regulatory protein | <a href="#">Gckr</a>               | 0.823 | -3.316 | 0.0123002   | 0.0781006 |
| 18720 | 10377800 |                                    |                           |                                |                                    | 0.823 | -1.916 | 0.0956775   | 0.300774  |
| 18721 | 10483817 | <a href="#">AK031731</a>           | <a href="#">100038544</a> | predicted gene, ENSMUSG0000007 | <a href="#">ENSMUSG00000075275</a> | 0.823 | -1.94  | 0.0923085   | 0.294385  |
| 18722 | 10355310 | <a href="#">XR_032645</a>          | <a href="#">675609</a>    | similar to 60S ribosomal prote | <a href="#">LOC675609</a>          | 0.823 | -2.648 | 0.0321806   | 0.150603  |
| 18723 | 10571884 |                                    |                           |                                |                                    | 0.822 | -2.459 | 0.0425253   | 0.180698  |
| 18724 | 10534986 |                                    |                           |                                |                                    | 0.822 | -1.998 | 0.0846708   | 0.279368  |
| 18725 | 10585932 | <a href="#">NM_011099</a>          | <a href="#">18746</a>     | pyruvate kinase, muscle        | <a href="#">Pkm2</a>               | 0.822 | -5.497 | 0.000822211 | 0.01146   |
| 18726 | 10580188 | <a href="#">NM_025788</a>          | <a href="#">66830</a>     | BTB (POZ) domain containing 14 | <a href="#">Btbd14b</a>            | 0.822 | -3.925 | 0.00538403  | 0.0435667 |
| 18727 | 10488860 |                                    |                           |                                |                                    | 0.822 | -2.544 | 0.0374745   | 0.166652  |
| 18728 | 10509856 |                                    |                           |                                |                                    | 0.822 | -1.458 | 0.186878    | 0.445172  |
| 18729 | 10402225 | <a href="#">ENSMUST00000021605</a> | <a href="#">109181</a>    | thyroid hormone receptor inter | <a href="#">Trip11</a>             | 0.822 | -3.401 | 0.010927    | 0.0720425 |
| 18730 | 10384266 | <a href="#">ENSMUST00000055297</a> | <a href="#">171395</a>    | polycystic kidney disease 1 li | <a href="#">Pkd11l</a>             | 0.822 | -2.857 | 0.0236611   | 0.12253   |
| 18731 | 10442580 | <a href="#">NM_008503</a>          | <a href="#">16898</a>     | ribosomal protein S2           | <a href="#">Rps2</a>               | 0.822 | -2.158 | 0.0666475   | 0.241189  |
| 18732 | 10516906 |                                    |                           |                                |                                    | 0.822 | -1.411 | 0.199981    | 0.461766  |
| 18733 | 10372889 | <a href="#">AK135663</a>           | <a href="#">270802</a>    | cDNA sequence BC048403         | <a href="#">BC048403</a>           | 0.822 | -2.767 | 0.0270081   | 0.133769  |
| 18734 | 10436890 | <a href="#">ENSMUST00000114029</a> | <a href="#">100038392</a> | predicted gene, ENSMUSG0000007 | <a href="#">ENSMUSG00000074911</a> | 0.822 | -1.944 | 0.0917748   | 0.293524  |
| 18735 | 10501795 | <a href="#">NM_028456</a>          | <a href="#">73170</a>     | RWD domain containing 3        | <a href="#">Rwdtd3</a>             | 0.822 | -2.706 | 0.0295148   | 0.141958  |
| 18736 | 10560443 | <a href="#">NM_001080815</a>       | <a href="#">381853</a>    | gastric inhibitory polypeptide | <a href="#">Gipr</a>               | 0.822 | -3.014 | 0.0188621   | 0.105433  |
| 18737 | 10457475 | <a href="#">NM_134130</a>          | <a href="#">106861</a>    | abhydrolase domain containing  | <a href="#">Abhd3</a>              | 0.822 | -2.089 | 0.0739176   | 0.256931  |
| 18738 | 10540215 | <a href="#">NM_026255</a>          | <a href="#">67582</a>     | solute carrier family 25 (mito | <a href="#">Slc25a26</a>           | 0.821 | -2.008 | 0.0834513   | 0.276567  |
| 18739 | 10562234 | <a href="#">NM_001110252</a>       | <a href="#">15451</a>     | hepsin                         | <a href="#">Hpn</a>                | 0.821 | -2.207 | 0.0619593   | 0.230038  |
| 18740 | 10436600 |                                    |                           |                                |                                    | 0.821 | -0.486 | 0.641352    | 0.837465  |
| 18741 | 10377308 | <a href="#">BC024997</a>           | <a href="#">215723</a>    | cDNA sequence BC024997         | <a href="#">BC024997</a>           | 0.821 | -1.836 | 0.10775     | 0.323709  |
| 18742 | 10389099 | <a href="#">NM_011235</a>          | <a href="#">19364</a>     | RAD51-like 3 (S. cerevisiae)   | <a href="#">Rad51l3</a>            | 0.821 | -2.86  | 0.0235811   | 0.122205  |
| 18743 | 10417579 | <a href="#">BC064468</a>           | <a href="#">74430</a>     | RIKEN cDNA 4930452B06 gene     | <a href="#">4930452B06Rik</a>      | 0.821 | -3.443 | 0.010301    | 0.0694203 |
| 18744 | 10598018 |                                    |                           |                                |                                    | 0.821 | -1.418 | 0.197918    | 0.458756  |
| 18745 | 10446229 | <a href="#">NM_009404</a>          | <a href="#">21950</a>     | tumor necrosis factor (ligand) | <a href="#">Tnfsf9</a>             | 0.821 | -1.73  | 0.125977    | 0.355325  |
| 18746 | 10374790 |                                    |                           |                                |                                    | 0.821 | -0.899 | 0.397865    | 0.664302  |
| 18747 | 10594048 | <a href="#">NM_177193</a>          | <a href="#">320563</a>    | immunoglobulin superfamily con | <a href="#">Islr2</a>              | 0.821 | -3.146 | 0.015615    | 0.0928214 |
| 18748 | 10585680 | <a href="#">ENSMUST00000105102</a> | <a href="#">791384</a>    | predicted gene, ENSMUSG0000006 | <a href="#">ENSMUSG00000060915</a> | 0.821 | -3.797 | 0.00637293  | 0.0490168 |
| 18749 | 10344723 | <a href="#">NM_021511</a>          | <a href="#">59014</a>     | RRS1 ribosome biogenesis regul | <a href="#">Rrs1</a>               | 0.821 | -4.37  | 0.00304769  | 0.0290606 |
| 18750 | 10562096 | <a href="#">NM_027215</a>          | <a href="#">69804</a>     | transmembrane protein 147      | <a href="#">Tmem147</a>            | 0.821 | -2.623 | 0.0333858   | 0.154129  |
| 18751 | 10542477 | <a href="#">NM_011084</a>          | <a href="#">18705</a>     | phosphatidylinositol 3-kinase, | <a href="#">Pik3c2g</a>            | 0.821 | -2.871 | 0.023185    | 0.120967  |
| 18752 | 10553555 |                                    |                           |                                |                                    | 0.821 | -1.998 | 0.0846965   | 0.27938   |
| 18753 | 10606376 | <a href="#">BC016070</a>           | <a href="#">67028</a>     | RIKEN cDNA 2610002M06 gene     | <a href="#">2610002M06Rik</a>      | 0.821 | -3.397 | 0.0109758   | 0.072229  |
| 18754 | 10512059 | <a href="#">ENSMUST00000108122</a> | <a href="#">242384</a>    | leucine rich repeat and Ig dom | <a href="#">Lingo2</a>             | 0.821 | -2.308 | 0.0532835   | 0.209343  |
| 18755 | 10578361 | <a href="#">NM_019734</a>          | <a href="#">11886</a>     | N-acylsphingosine amidohydrola | <a href="#">Asah1</a>              | 0.821 | -2.444 | 0.0434904   | 0.183399  |
| 18756 | 10406005 | <a href="#">NM_010574</a>          | <a href="#">16372</a>     | Iroquois related homeobox 2 (D | <a href="#">Irx2</a>               | 0.821 | -3.265 | 0.013203    | 0.0825439 |
| 18757 | 10365037 | <a href="#">NM_010768</a>          | <a href="#">17179</a>     | megakaryocyte-associated tyros | <a href="#">Matk</a>               | 0.821 | -2.622 | 0.033404    | 0.154179  |
| 18758 | 10421709 | <a href="#">NM_001037935</a>       | <a href="#">629678</a>    | predicted gene, EG629678       | <a href="#">EG629678</a>           | 0.821 | -2.425 | 0.0447786   | 0.187184  |
| 18759 | 10409365 | <a href="#">NM_012014</a>          | <a href="#">26913</a>     | G protein-regulated inducer of | <a href="#">Gprin1</a>             | 0.821 | -2.898 | 0.022316    | 0.117786  |
| 18760 | 10446907 | <a href="#">NM_152817</a>          | <a href="#">74196</a>     | tetratricopeptide repeat domai | <a href="#">Ttc27</a>              | 0.821 | -3.828 | 0.00611965  | 0.0475713 |
| 18761 | 10539960 |                                    |                           |                                |                                    | 0.821 | -1.92  | 0.0951163   | 0.299747  |
| 18762 | 10489506 | <a href="#">NM_029325</a>          | <a href="#">75526</a>     | serine protease inhibitor-like | <a href="#">Spinlw1</a>            | 0.821 | -1.224 | 0.259487    | 0.533772  |
| 18763 | 10550531 | <a href="#">BC049852</a>           | <a href="#">68188</a>     | symplekin                      | <a href="#">Sympk</a>              | 0.821 | -3.702 | 0.00723919  | 0.0540104 |
| 18764 | 10596680 | <a href="#">NM_001042779</a>       | <a href="#">20347</a>     | sema domain, immunoglobulin do | <a href="#">Sema3b</a>             | 0.821 | -2.77  | 0.0268987   | 0.133446  |
| 18765 | 10393668 | <a href="#">NM_007377</a>          | <a href="#">11302</a>     | apoptosis-associated tyrosine  | <a href="#">Aatk</a>               | 0.82  | -1.718 | 0.128153    | 0.358993  |

|       |          |                                    |                           |                                |                                    |       |        |            |           |
|-------|----------|------------------------------------|---------------------------|--------------------------------|------------------------------------|-------|--------|------------|-----------|
| 18766 | 10480329 | <a href="#">NM_007869</a>          | <a href="#">13418</a>     | DnaJ (Hsp40) homolog, subfamil | <a href="#">Dnajc1</a>             | 0.82  | -3.355 | 0.011637   | 0.0753148 |
| 18767 | 10443876 | <a href="#">NM_001100187</a>       | <a href="#">677156</a>    | cytochrome P450, family 4, sub | <a href="#">Cyp4f37</a>            | 0.82  | -2.602 | 0.0343959  | 0.157065  |
| 18768 | 10566067 | <a href="#">NM_029211</a>          | <a href="#">75212</a>     | ring finger protein 121        | <a href="#">Rnf121</a>             | 0.82  | -3.04  | 0.0181766  | 0.102596  |
| 18769 | 10414489 | <a href="#">NM_146299</a>          | <a href="#">258296</a>    | olfactory receptor 745         | <a href="#">Olfir745</a>           | 0.82  | -1.536 | 0.167139   | 0.418125  |
| 18770 | 10491544 | <a href="#">NM_138303</a>          | <a href="#">74766</a>     | Yip1 domain family, member 2   | <a href="#">Yipf2</a>              | 0.82  | -3.006 | 0.019086   | 0.406283  |
| 18771 | 10470647 | <a href="#">NM_023623</a>          | <a href="#">71754</a>     | cytochrome P450, family 2, sub | <a href="#">Cyp2d40</a>            | 0.82  | -0.977 | 0.360352   | 0.632213  |
| 18772 | 10430899 | <a href="#">NM_023623</a>          | <a href="#">71754</a>     | cytochrome P450, family 2, sub | <a href="#">Cyp2d40</a>            | 0.82  | -0.977 | 0.360352   | 0.632213  |
| 18773 | 10392374 | <a href="#">NM_080644</a>          | <a href="#">140723</a>    | calcium channel, voltage-depen | <a href="#">Cacng5</a>             | 0.82  | -3.125 | 0.0160876  | 0.094857  |
| 18774 | 10345409 |                                    |                           |                                |                                    | 0.82  | -2.119 | 0.0706656  | 0.249441  |
| 18775 | 10389674 | <a href="#">NM_026556</a>          | <a href="#">68097</a>     | dynein light chain LC8-type 2  | <a href="#">Dylnl2</a>             | 0.82  | -3.356 | 0.0116255  | 0.0752784 |
| 18776 | 10434689 | <a href="#">NM_013465</a>          | <a href="#">11625</a>     | alpha-2-HS-glycoprotein        | <a href="#">Ahsq</a>               | 0.82  | -2.122 | 0.0703303  | 0.248465  |
| 18777 | 10512721 | <a href="#">NM_018741</a>          | <a href="#">75426</a>     | insulin-like growth factor bin | <a href="#">Igf1bp1</a>            | 0.82  | -3.205 | 0.0143803  | 0.0876498 |
| 18778 | 10364718 | <a href="#">BC146018</a>           | <a href="#">69770</a>     | RIKEN cDNA 1600002K03 gene     | <a href="#">1600002K03Rik</a>      | 0.82  | -2.872 | 0.023174   | 0.120967  |
| 18779 | 10344960 | <a href="#">NM_027415</a>          | <a href="#">70397</a>     | transmembrane protein 70       | <a href="#">Tmem70</a>             | 0.82  | -2.44  | 0.0437508  | 0.18424   |
| 18780 | 10368577 | <a href="#">ENSMUST00000081989</a> | <a href="#">268291</a>    | ring finger protein 217        | <a href="#">Rnf217</a>             | 0.82  | -3.249 | 0.01351    | 0.0837207 |
| 18781 | 10410124 | <a href="#">NM_009984</a>          | <a href="#">13039</a>     | cathepsin L                    | <a href="#">Ctsl</a>               | 0.82  | -3.65  | 0.00776886 | 0.0567997 |
| 18782 | 10447038 | <a href="#">ENSMUST00000063817</a> | <a href="#">68554</a>     | RIKEN cDNA 1110001A16 gene     | <a href="#">1110001A16Rik</a>      | 0.82  | -3.28  | 0.0129367  | 0.0811915 |
| 18783 | 10533929 | <a href="#">NM_016741</a>          | <a href="#">20778</a>     | scavenger receptor class B, me | <a href="#">Scarb1</a>             | 0.82  | -3.794 | 0.00640297 | 0.0491057 |
| 18784 | 10569368 | <a href="#">ENSMUST00000116041</a> | <a href="#">640264</a>    | predicted gene, EG640264       | <a href="#">EG640264</a>           | 0.82  | -2.427 | 0.0446381  | 0.186934  |
| 18785 | 10376885 |                                    |                           |                                |                                    | 0.82  | -1.53  | 0.168565   | 0.419952  |
| 18786 | 10468584 | <a href="#">NM_001033573</a>       | <a href="#">66980</a>     | zinc finger, DHHC domain conta | <a href="#">Zdhhc6</a>             | 0.82  | -2.885 | 0.0227416  | 0.119465  |
| 18787 | 10403716 | <a href="#">NM_134067</a>          | <a href="#">105351</a>    | expressed sequence AW209491    | <a href="#">AW209491</a>           | 0.819 | -3.505 | 0.0094634  | 0.0653049 |
| 18788 | 10565689 | <a href="#">NM_007602</a>          | <a href="#">12337</a>     | calpain 5                      | <a href="#">Capn5</a>              | 0.819 | -2.789 | 0.0261281  | 0.130964  |
| 18789 | 10452202 | <a href="#">NM_175731</a>          | <a href="#">171168</a>    | N-acylsphingosine amidohydrola | <a href="#">Asah3</a>              | 0.819 | -1.904 | 0.0973473  | 0.303944  |
| 18790 | 10501397 | <a href="#">BC050932</a>           | <a href="#">67495</a>     | RIKEN cDNA 2010200O16 gene     | <a href="#">2010200O16Rik</a>      | 0.819 | -3.361 | 0.0115425  | 0.0749094 |
| 18791 | 10369288 | <a href="#">XR_030676</a>          | <a href="#">664936</a>    | similar to ribosomal protein L | <a href="#">LOC664936</a>          | 0.819 | -1.872 | 0.102201   | 0.313502  |
| 18792 | 10437451 | <a href="#">BC013706</a>           | <a href="#">207740</a>    | RIKEN cDNA 1500031H01 gene     | <a href="#">1500031H01Rik</a>      | 0.819 | -3.009 | 0.018997   | 0.105954  |
| 18793 | 10457465 | <a href="#">NM_001081222</a>       | <a href="#">77805</a>     | establishment of cohesion 1 ho | <a href="#">Esco1</a>              | 0.819 | -2.426 | 0.044707   | 0.187121  |
| 18794 | 10406026 | <a href="#">NM_053163</a>          | <a href="#">94066</a>     | mitochondrial ribosomal protei | <a href="#">Mrpl36</a>             | 0.819 | -4.569 | 0.00238587 | 0.0246443 |
| 18795 | 10359386 | <a href="#">NM_172644</a>          | <a href="#">226539</a>    | aspartyl-tRNA synthetase 2 (mi | <a href="#">Dars2</a>              | 0.819 | -2.561 | 0.0365692  | 0.163532  |
| 18796 | 10586397 | <a href="#">NM_027134</a>          | <a href="#">69606</a>     | mitochondrial methionyl-tRNA f | <a href="#">Mtfmt</a>              | 0.819 | -2.867 | 0.0233393  | 0.121369  |
| 18797 | 10472738 | <a href="#">BC031546</a>           | <a href="#">75763</a>     | RIKEN cDNA 4833418A01 gene     | <a href="#">4833418A01Rik</a>      | 0.819 | -2.849 | 0.0239649  | 0.1238    |
| 18798 | 10414260 | <a href="#">NM_001123394</a>       | <a href="#">11730</a>     | angiogenin, ribonuclease A fam | <a href="#">Ang3</a>               | 0.819 | -3.013 | 0.0189024  | 0.105538  |
| 18799 | 10446823 | <a href="#">NM_026417</a>          | <a href="#">67864</a>     | Yip1 domain family, member 4   | <a href="#">Yipf4</a>              | 0.819 | -4.59  | 0.00232641 | 0.02416   |
| 18800 | 10595924 | <a href="#">NM_029094</a>          | <a href="#">74769</a>     | phosphatidylinositol 3-kinase, | <a href="#">Pik3cb</a>             | 0.819 | -2.75  | 0.0276864  | 0.13614   |
| 18801 | 10347226 | <a href="#">NM_175564</a>          | <a href="#">271711</a>    | transmembrane protein 169      | <a href="#">Tmem169</a>            | 0.819 | -1.42  | 0.197237   | 0.457905  |
| 18802 | 10590304 | <a href="#">XR_033018</a>          | <a href="#">638068</a>    | similar to Interleukin-1 recep | <a href="#">LOC638068</a>          | 0.819 | -1.873 | 0.101941   | 0.312948  |
| 18803 | 10405236 | <a href="#">NM_027324</a>          | <a href="#">14057</a>     | sideroflexin 1                 | <a href="#">Sfxn1</a>              | 0.819 | -4.333 | 0.00319173 | 0.0299405 |
| 18804 | 10376854 | <a href="#">NM_001039536</a>       | <a href="#">327942</a>    | phosphatidylinositol glycan an | <a href="#">Pigl</a>               | 0.819 | -3.278 | 0.0129578  | 0.0812998 |
| 18805 | 10529890 | <a href="#">ENSMUST00000030975</a> | <a href="#">73975</a>     | RIKEN cDNA 4930435H24 gene     | <a href="#">4930435H24Rik</a>      | 0.819 | -3.62  | 0.00808861 | 0.0584536 |
| 18806 | 10465314 | <a href="#">NM_007600</a>          | <a href="#">12333</a>     | calpain 1                      | <a href="#">Capn1</a>              | 0.819 | -3.988 | 0.00495577 | 0.0410599 |
| 18807 | 10554549 | <a href="#">NM_001004185</a>       | <a href="#">434204</a>    | WAS protein homology region 2  | <a href="#">Whdc1</a>              | 0.819 | -3.664 | 0.00762116 | 0.0561274 |
| 18808 | 10583297 | <a href="#">NM_029248</a>          | <a href="#">75316</a>     | Josephin domain containing 3   | <a href="#">Josd3</a>              | 0.819 | -3.862 | 0.00585188 | 0.0462086 |
| 18809 | 10444957 | <a href="#">NM_175934</a>          | <a href="#">52040</a>     | protein phosphatase 1, regulat | <a href="#">Ppp1r10</a>            | 0.819 | -4.572 | 0.00237919 | 0.0246076 |
| 18810 | 10346330 | <a href="#">NM_001114663</a>       | <a href="#">227120</a>    | phospholipase C-like 1         | <a href="#">Plec1</a>              | 0.819 | -1.251 | 0.250097   | 0.524217  |
| 18811 | 10575961 | <a href="#">NM_009462</a>          | <a href="#">22224</a>     | ubiquitin specific peptidase 1 | <a href="#">Usp10</a>              | 0.818 | -2.954 | 0.0205602  | 0.112129  |
| 18812 | 10586844 | <a href="#">NM_007399</a>          | <a href="#">11487</a>     | a disintegrin and metallopepti | <a href="#">Adam10</a>             | 0.818 | -3.111 | 0.0164341  | 0.0962129 |
| 18813 | 10576944 | <a href="#">ENSMUST00000075769</a> | <a href="#">100126875</a> | predicted gene, ENSMUSG0000005 | <a href="#">ENSMUSG00000059543</a> | 0.818 | -1.604 | 0.151584   | 0.395471  |
| 18814 | 10424991 | <a href="#">NM_027122</a>          | <a href="#">69572</a>     | major facilitator superfamily  | <a href="#">Mfsd3</a>              | 0.818 | -2.417 | 0.0452852  | 0.18819   |
| 18815 | 10354644 | <a href="#">XM_907010</a>          | <a href="#">627915</a>    | predicted gene, EG627915       | <a href="#">EG627915</a>           | 0.818 | -1.675 | 0.136622   | 0.373124  |
| 18816 | 10376579 | <a href="#">NM_029044</a>          | <a href="#">74665</a>     | leucine rich repeat containing | <a href="#">Lrrc48</a>             | 0.818 | -3.447 | 0.0102471  | 0.0691558 |

|       |          |                                    |                           |                                |                                   |       |        |            |           |
|-------|----------|------------------------------------|---------------------------|--------------------------------|-----------------------------------|-------|--------|------------|-----------|
| 18817 | 10584835 | <a href="#">NM_176993</a>          | <a href="#">319742</a>    | myelin protein zero-like 3     | <a href="#">Mpzl3</a>             | 0.818 | -2.057 | 0.0774889  | 0.264348  |
| 18818 | 10366229 | <a href="#">NM_001039354</a>       | <a href="#">108030</a>    | lin-7 homolog A (C. elegans)   | <a href="#">Lin7a</a>             | 0.818 | -1.397 | 0.203945   | 0.467196  |
| 18819 | 10436200 | <a href="#">XR_034572</a>          | <a href="#">100048225</a> | hypothetical protein LOC100048 | <a href="#">LOC100048225</a>      | 0.818 | -1.018 | 0.341392   | 0.616096  |
| 18820 | 10530306 | <a href="#">NM_008888</a>          | <a href="#">18935</a>     | paired-like homeobox 2b        | <a href="#">Phox2b</a>            | 0.818 | -1.315 | 0.228741   | 0.499844  |
| 18821 | 10373728 | <a href="#">NM_019574</a>          | <a href="#">56218</a>     | POZ (BTB) and AT hook containi | <a href="#">Patz1</a>             | 0.818 | -2.522 | 0.0387639  | 0.170294  |
| 18822 | 10485546 | <a href="#">NM_001033347</a>       | <a href="#">241589</a>    | RIKEN cDNA D430041D05 gene     | <a href="#">D430041D05Rik</a>     | 0.818 | -2.215 | 0.061208   | 0.228343  |
| 18823 | 10379034 | <a href="#">NM_026708</a>          | <a href="#">68385</a>     | TLC domain containing 1        | <a href="#">Tlcd1</a>             | 0.818 | -2.966 | 0.0202179  | 0.110633  |
| 18824 | 10584741 | <a href="#">NM_008063</a>          | <a href="#">14385</a>     | solute carrier family 37 (gluc | <a href="#">Slc37a4</a>           | 0.818 | -2.688 | 0.0303142  | 0.144742  |
| 18825 | 10458334 | <a href="#">NM_026027</a>          | <a href="#">67199</a>     | prefoldin 1                    | <a href="#">Pfdn1</a>             | 0.818 | -4.519 | 0.00253633 | 0.0256417 |
| 18826 | 10425578 | <a href="#">NM_001081016</a>       | <a href="#">20286</a>     | zinc finger CCCH type containi | <a href="#">Zc3h7b</a>            | 0.818 | -3.509 | 0.00940992 | 0.0649994 |
| 18827 | 10526250 | <a href="#">NM_145215</a>          | <a href="#">68758</a>     | abhydrolase domain containing  | <a href="#">Abhd11</a>            | 0.818 | -2.923 | 0.0215207  | 0.114965  |
| 18828 | 10474181 | <a href="#">NM_178890</a>          | <a href="#">99382</a>     | ankyrin repeat and BTB (POZ) d | <a href="#">Abtb2</a>             | 0.818 | -3.245 | 0.0135859  | 0.0840927 |
| 18829 | 10465804 | <a href="#">NM_026329</a>          | <a href="#">67710</a>     | polymerase (RNA) II (DNA direc | <a href="#">Polr2g</a>            | 0.818 | -3.724 | 0.007033   | 0.0527699 |
| 18830 | 10529142 | <a href="#">NM_008014</a>          | <a href="#">14208</a>     | protein phosphatase 1G (former | <a href="#">Ppm1g</a>             | 0.818 | -3.904 | 0.00553143 | 0.0444702 |
| 18831 | 10566705 | <a href="#">NM_146306</a>          | <a href="#">258303</a>    | olfactory receptor 518         | <a href="#">Olf518</a>            | 0.818 | -2.181 | 0.0644307  | 0.236227  |
| 18832 | 10501420 | <a href="#">NM_011504</a>          | <a href="#">20912</a>     | syntaxin binding protein 3A    | <a href="#">Stxbp3a</a>           | 0.817 | -1.54  | 0.166164   | 0.417017  |
| 18833 | 10530045 | <a href="#">NM_172490</a>          | <a href="#">211006</a>    | Sep (O-phosphoserine) tRNA:Sec | <a href="#">Sepsecs</a>           | 0.817 | -2.795 | 0.0259285  | 0.130438  |
| 18834 | 10588707 | <a href="#">NM_025903</a>          | <a href="#">15983</a>     | interferon-related development | <a href="#">Ifrd2</a>             | 0.817 | -3.14  | 0.0157659  | 0.0934287 |
| 18835 | 10428447 | <a href="#">XM_484465</a>          | <a href="#">432951</a>    | predicted gene, EG432951       | <a href="#">EG432951</a>          | 0.817 | -1.424 | 0.196337   | 0.456744  |
| 18836 | 10526614 | <a href="#">NM_031404</a>          | <a href="#">83766</a>     | actin-like 6B                  | <a href="#">Actl6b</a>            | 0.817 | -2.128 | 0.0697763  | 0.247552  |
| 18837 | 10372497 | <a href="#">NM_025780</a>          | <a href="#">66816</a>     | THAP domain containing, apopto | <a href="#">Thap2</a>             | 0.817 | -2.259 | 0.0572941  | 0.219025  |
| 18838 | 10507671 | <a href="#">NM_008190</a>          | <a href="#">14915</a>     | guanylate cyclase activator 2a | <a href="#">Guca2a</a>            | 0.817 | -3.095 | 0.0167962  | 0.0975911 |
| 18839 | 10475247 | <a href="#">NM_175285</a>          | <a href="#">96957</a>     | transmembrane protein 62       | <a href="#">Tmem62</a>            | 0.817 | -2.194 | 0.0632101  | 0.233045  |
| 18840 | 10469505 | <a href="#">NM_147778</a>          | <a href="#">12238</a>     | COMM domain containing 3       | <a href="#">Comm3</a>             | 0.817 | -4.67  | 0.00211372 | 0.022662  |
| 18841 | 10387108 | <a href="#">ENSMUST00000101039</a> | <a href="#">100038666</a> | predicted gene, OTTMUSG0000000 | <a href="#">OTTMUSG0000005912</a> | 0.817 | -1.888 | 0.0997332  | 0.308614  |
| 18842 | 10574718 | <a href="#">NM_025486</a>          | <a href="#">66320</a>     | transmembrane protein 208      | <a href="#">Tmem208</a>           | 0.817 | -3.433 | 0.0104482  | 0.0700433 |
| 18843 | 10582642 | <a href="#">NM_133966</a>          | <a href="#">102162</a>    | TAF5-like RNA polymerase II, p | <a href="#">Taf5l</a>             | 0.817 | -3.465 | 0.00999332 | 0.0680694 |
| 18844 | 10445229 |                                    |                           |                                |                                   | 0.817 | -2.527 | 0.0384331  | 0.169439  |
| 18845 | 10466290 | <a href="#">NM_146682</a>          | <a href="#">258677</a>    | olfactory receptor 76          | <a href="#">Olf76</a>             | 0.817 | -1.895 | 0.0986449  | 0.306683  |
| 18846 | 10457834 | <a href="#">AK032191</a>           | <a href="#">319211</a>    | nucleolar protein 4            | <a href="#">Nol4</a>              | 0.817 | -2.873 | 0.023143   | 0.120943  |
| 18847 | 10415723 |                                    |                           |                                |                                   | 0.817 | -1.753 | 0.121773   | 0.348413  |
| 18848 | 10443391 | <a href="#">NM_011951</a>          | <a href="#">26416</a>     | mitogen-activated protein kina | <a href="#">Mapk14</a>            | 0.817 | -3.274 | 0.0130406  | 0.0816981 |
| 18849 | 10545807 | <a href="#">NM_011467</a>          | <a href="#">20751</a>     | sepiapterin reductase          | <a href="#">Spr</a>               | 0.817 | -2.985 | 0.0196807  | 0.10865   |
| 18850 | 10557571 | <a href="#">BC038694</a>           | <a href="#">101602</a>    | expressed sequence AI467606    | <a href="#">AI467606</a>          | 0.817 | -2.507 | 0.0396063  | 0.172845  |
| 18851 | 10551750 | <a href="#">XR_035432</a>          | <a href="#">114675</a>    | RIKEN cDNA 4932431P20 gene     | <a href="#">4932431P20Rik</a>     | 0.817 | -2.084 | 0.0744888  | 0.258195  |
| 18852 | 10349065 | <a href="#">NM_001122676</a>       | <a href="#">227449</a>    | zinc finger, CCHC domain conta | <a href="#">Zcchc2</a>            | 0.816 | -2.574 | 0.0358853  | 0.161438  |
| 18853 | 10575102 | <a href="#">NM_011574</a>          | <a href="#">21771</a>     | cirrhosis, autosomal recessive | <a href="#">Cirh1a</a>            | 0.816 | -3.046 | 0.0180176  | 0.102026  |
| 18854 | 10583312 |                                    |                           |                                |                                   | 0.816 | -1.751 | 0.122155   | 0.349316  |
| 18855 | 10529815 |                                    |                           |                                |                                   | 0.816 | -1.968 | 0.0885841  | 0.286933  |
| 18856 | 10571415 | <a href="#">NM_033560</a>          | <a href="#">52348</a>     | vacuolar protein sorting 37A ( | <a href="#">Vps37a</a>            | 0.816 | -2.814 | 0.0251909  | 0.128038  |
| 18857 | 10591072 | <a href="#">NM_181816</a>          | <a href="#">234964</a>    | coiled-coil domain containing  | <a href="#">Ccdc67</a>            | 0.816 | -3.903 | 0.00554313 | 0.0445473 |
| 18858 | 10528332 | <a href="#">NM_178728</a>          | <a href="#">242864</a>    | N-acyl phosphatidylethanolamin | <a href="#">Napepld</a>           | 0.816 | -2.309 | 0.0532062  | 0.209262  |
| 18859 | 10400095 | <a href="#">NM_013562</a>          | <a href="#">15982</a>     | interferon-related development | <a href="#">Ifrd1</a>             | 0.816 | -3.086 | 0.0170212  | 0.0984128 |
| 18860 | 10381601 | <a href="#">M86736</a>             | <a href="#">14824</a>     | granulin                       | <a href="#">Grn</a>               | 0.816 | -4.411 | 0.00289795 | 0.0281591 |
| 18861 | 10527323 | <a href="#">NM_010800</a>          | <a href="#">17341</a>     | basic helix-loop-helix domain  | <a href="#">Bhlhb8</a>            | 0.816 | -2.825 | 0.024818   | 0.126844  |
| 18862 | 10382698 | <a href="#">ENSMUST00000100221</a> | <a href="#">68528</a>     | RIKEN cDNA 1110017F19 gene     | <a href="#">1110017F19Rik</a>     | 0.816 | -2.336 | 0.0510667  | 0.203881  |
| 18863 | 10440929 | <a href="#">NM_010256</a>          | <a href="#">14450</a>     | phosphoribosylglycinamide form | <a href="#">Gart</a>              | 0.816 | -4.152 | 0.0040116  | 0.0350646 |
| 18864 | 10555736 | <a href="#">NM_147093</a>          | <a href="#">259097</a>    | olfactory receptor 558         | <a href="#">Olf558</a>            | 0.816 | -0.919 | 0.387994   | 0.656721  |
| 18865 | 10445678 | <a href="#">BC006605</a>           | <a href="#">224833</a>    | expressed sequence AI661453    | <a href="#">AI661453</a>          | 0.816 | -3.173 | 0.015046   | 0.0905843 |
| 18866 | 10369783 | <a href="#">NM_178679</a>          | <a href="#">216049</a>    | zinc finger protein 365        | <a href="#">Zfp365</a>            | 0.816 | -1.587 | 0.155334   | 0.400794  |
| 18867 | 10497520 | <a href="#">NM_007900</a>          | <a href="#">13605</a>     | ect2 oncogene                  | <a href="#">Ect2</a>              | 0.816 | -3.847 | 0.00596448 | 0.0467952 |

|       |          |                                    |                           |                                |                                    |       |        |            |           |
|-------|----------|------------------------------------|---------------------------|--------------------------------|------------------------------------|-------|--------|------------|-----------|
| 18808 | 10380222 | <a href="#">NM_016100</a>          | <a href="#">12812</a>     | conn                           | <a href="#">Con</a>                | 0.810 | -3.821 | 0.00617808 | 0.0478490 |
| 18869 | 10542929 | <a href="#">NM_007588</a>          | <a href="#">12311</a>     | calcitonin receptor            | <a href="#">Calcr</a>              | 0.816 | -2.861 | 0.0235296  | 0.122028  |
| 18870 | 10378893 | <a href="#">NM_026185</a>          | <a href="#">67477</a>     | RIKEN cDNA 1300007F04 gene     | <a href="#">1300007F04Rik</a>      | 0.816 | -2.344 | 0.0505219  | 0.202394  |
| 18871 | 10540537 |                                    |                           |                                |                                    | 0.816 | -1.62  | 0.148039   | 0.390187  |
| 18872 | 10509253 | <a href="#">BC048442</a>           | <a href="#">67663</a>     | RIKEN cDNA 4930549C01 gene     | <a href="#">4930549C01Rik</a>      | 0.816 | -2.218 | 0.0609869  | 0.227909  |
| 18873 | 10558740 | <a href="#">XM_001480612</a>       | <a href="#">100043546</a> | similar to DnaI-like protein   | <a href="#">LOC100043546</a>       | 0.816 | -1.569 | 0.159275   | 0.406366  |
| 18874 | 10523903 |                                    |                           |                                |                                    | 0.816 | -1.98  | 0.0869118  | 0.283546  |
| 18875 | 10348030 |                                    |                           |                                |                                    | 0.816 | -3.23  | 0.0138628  | 0.0853818 |
| 18876 | 10355069 | <a href="#">NM_001114609</a>       | <a href="#">227195</a>    | RIKEN cDNA A430093A21 gene     | <a href="#">A430093A21Rik</a>      | 0.815 | -4.043 | 0.00461559 | 0.0388503 |
| 18877 | 10420659 | <a href="#">BC037015</a>           | <a href="#">66674</a>     | RIKEN cDNA 6330409N04 gene     | <a href="#">6330409N04Rik</a>      | 0.815 | -2.576 | 0.0357426  | 0.161141  |
| 18878 | 10422962 | <a href="#">NM_001085410</a>       | <a href="#">68646</a>     | RIKEN cDNA 1110020G09 gene     | <a href="#">1110020G09Rik</a>      | 0.815 | -1.813 | 0.111547   | 0.330459  |
| 18879 | 10375497 |                                    |                           |                                |                                    | 0.815 | -1.968 | 0.0885137  | 0.286781  |
| 18880 | 10499958 | <a href="#">ENSMUST00000055957</a> | <a href="#">383891</a>    | predicted gene, EG383891       | <a href="#">EG383891</a>           | 0.815 | -1.571 | 0.158924   | 0.406028  |
| 18881 | 10465342 | <a href="#">NM_028454</a>          | <a href="#">73166</a>     | transmembrane 7 superfamily me | <a href="#">Tm7sf2</a>             | 0.815 | -3.319 | 0.0122459  | 0.0778362 |
| 18882 | 10510516 | <a href="#">NM_019741</a>          | <a href="#">56485</a>     | solute carrier family 2 (facil | <a href="#">Slc2a5</a>             | 0.815 | -3.029 | 0.0184576  | 0.103905  |
| 18883 | 10568780 | <a href="#">NM_001045483</a>       | <a href="#">69546</a>     | mitogen-activated protein kina | <a href="#">Mapk1ip1</a>           | 0.815 | -4.653 | 0.00215687 | 0.0229748 |
| 18884 | 10422980 | <a href="#">NM_177178</a>          | <a href="#">320506</a>    | LMBR1 domain containing 2      | <a href="#">Lmbrd2</a>             | 0.815 | -2.819 | 0.0250198  | 0.127548  |
| 18885 | 10387119 | <a href="#">NM_175681</a>          | <a href="#">93896</a>     | glucagon-like peptide 2 recept | <a href="#">Glp2r</a>              | 0.815 | -2.179 | 0.064577   | 0.236559  |
| 18886 | 10490212 | <a href="#">NM_022325</a>          | <a href="#">64138</a>     | cathepsin Z                    | <a href="#">Ctsz</a>               | 0.815 | -3.892 | 0.00562487 | 0.044999  |
| 18887 | 10350614 | <a href="#">NM_026876</a>          | <a href="#">98685</a>     | RIKEN cDNA 1190005F20 gene     | <a href="#">1190005F20Rik</a>      | 0.815 | -3.133 | 0.0159192  | 0.0941049 |
| 18888 | 10410302 | <a href="#">NM_001038651</a>       | <a href="#">629016</a>    | RIKEN cDNA E130120F12 gene     | <a href="#">E130120F12Rik</a>      | 0.815 | -1.875 | 0.101667   | 0.312356  |
| 18889 | 10467139 | <a href="#">NM_021460</a>          | <a href="#">16889</a>     | lysosomal acid lipase A        | <a href="#">Lipa</a>               | 0.814 | -1.438 | 0.19238    | 0.451814  |
| 18890 | 10503650 | <a href="#">XM_001000802</a>       | <a href="#">384001</a>    | peroxiredoxin 6, related seque | <a href="#">Prdx6-rs2</a>          | 0.814 | -2.356 | 0.0495782  | 0.200156  |
| 18891 | 10358359 | <a href="#">NM_145991</a>          | <a href="#">214498</a>    | cell division cycle 73, Paf1/R | <a href="#">Cdc73</a>              | 0.814 | -4.603 | 0.00229069 | 0.0239893 |
| 18892 | 10412701 | <a href="#">NM_146051</a>          | <a href="#">218734</a>    | RIKEN cDNA 3830406C13 gene     | <a href="#">3830406C13Rik</a>      | 0.814 | -3.453 | 0.0101614  | 0.0687311 |
| 18893 | 10591200 | <a href="#">XM_888877</a>          | <a href="#">624341</a>    | predicted gene, EG624341       | <a href="#">EG624341</a>           | 0.814 | -1.267 | 0.244377   | 0.517487  |
| 18894 | 10375485 |                                    |                           |                                |                                    | 0.814 | -2.508 | 0.0395718  | 0.172766  |
| 18895 | 10499948 | <a href="#">NM_001039594</a>       | <a href="#">545548</a>    | late cornified envelope 3A     | <a href="#">Lce3a</a>              | 0.814 | -1.503 | 0.175421   | 0.4287    |
| 18896 | 10417002 | <a href="#">AK043702</a>           | <a href="#">320427</a>    | RIKEN cDNA A830021K08 gene     | <a href="#">A830021K08Rik</a>      | 0.814 | -1.882 | 0.100612   | 0.31038   |
| 18897 | 10587653 | <a href="#">AK133266</a>           | <a href="#">100038370</a> | predicted gene, ENSMUSG0000007 | <a href="#">ENSMUSG00000074150</a> | 0.814 | -2.806 | 0.0255111  | 0.129261  |
| 18898 | 10554419 | <a href="#">NM_178070</a>          | <a href="#">233405</a>    | vacuolar protein sorting 33B ( | <a href="#">Vps33b</a>             | 0.814 | -3.197 | 0.0145386  | 0.0884107 |
| 18899 | 10484190 | <a href="#">ENSMUST00000099981</a> | <a href="#">22138</a>     | titin                          | <a href="#">Ttn</a>                | 0.814 | -2.39  | 0.0471268  | 0.192955  |
| 18900 | 10593325 | <a href="#">NM_011220</a>          | <a href="#">19286</a>     | 6-pyruvoyl-tetrahydropterin sy | <a href="#">Pts</a>                | 0.814 | -4.172 | 0.00391431 | 0.0344133 |
| 18901 | 10373571 | <a href="#">BC037624</a>           | <a href="#">73827</a>     | RIKEN cDNA 1110012D08 gene     | <a href="#">1110012D08Rik</a>      | 0.814 | -3.402 | 0.0109016  | 0.0719199 |
| 18902 | 10606393 | <a href="#">NM_001081477</a>       | <a href="#">382236</a>    | bromodomain and WD repeat doma | <a href="#">Brwd3</a>              | 0.814 | -2.587 | 0.0352054  | 0.159602  |
| 18903 | 10420853 | <a href="#">NM_010932</a>          | <a href="#">18155</a>     | prepronociceptin               | <a href="#">Pnoc</a>               | 0.814 | -2.573 | 0.0359018  | 0.161478  |
| 18904 | 10364559 | <a href="#">NM_007880</a>          | <a href="#">13496</a>     | AT rich interactive domain 3A  | <a href="#">Arid3a</a>             | 0.814 | -2.815 | 0.0251633  | 0.127928  |
| 18905 | 10571774 | <a href="#">NM_001005847</a>       | <a href="#">11593</a>     | aspartylglucosaminidase        | <a href="#">Aga</a>                | 0.814 | -3.347 | 0.0117711  | 0.0757648 |
| 18906 | 10600476 | <a href="#">XM_141845</a>          | <a href="#">245472</a>    | predicted gene, EG245472       | <a href="#">EG245472</a>           | 0.814 | -2.45  | 0.0431132  | 0.182463  |
| 18907 | 10383358 |                                    |                           |                                |                                    | 0.814 | -2.269 | 0.0564551  | 0.217193  |
| 18908 | 10389879 | <a href="#">NM_181819</a>          | <a href="#">278507</a>    | WAP, follistatin/kazal, immuno | <a href="#">Wfikn2</a>             | 0.814 | -2.663 | 0.0314781  | 0.148334  |
| 18909 | 10526947 | <a href="#">NM_177000</a>          | <a href="#">319772</a>    | RIKEN cDNA C130050O18 gene     | <a href="#">C130050O18Rik</a>      | 0.814 | -2.186 | 0.0638943  | 0.23479   |
| 18910 | 10392207 | <a href="#">NM_198292</a>          | <a href="#">21763</a>     | testis expressed gene 2        | <a href="#">Tex2</a>               | 0.814 | -3.311 | 0.0123716  | 0.0784363 |
| 18911 | 10600911 | <a href="#">NM_207633</a>          | <a href="#">77929</a>     | Yip1 domain family, member 6   | <a href="#">Yipf6</a>              | 0.814 | -4.076 | 0.00442677 | 0.0375626 |
| 18912 | 10383930 | <a href="#">ENSMUST00000092922</a> | <a href="#">100038587</a> | predicted gene, ENSMUSG0000006 | <a href="#">ENSMUSG00000069821</a> | 0.813 | -2.02  | 0.0819952  | 0.273542  |
| 18913 | 10560481 | <a href="#">NM_008036</a>          | <a href="#">14282</a>     | FBJ osteosarcoma oncogene B    | <a href="#">Fosb</a>               | 0.813 | -2.571 | 0.0360195  | 0.161869  |
| 18914 | 10421975 | <a href="#">BC117005</a>           | <a href="#">76789</a>     | RIKEN cDNA 2410129H14 gene     | <a href="#">2410129H14Rik</a>      | 0.813 | -3.404 | 0.0108711  | 0.0718087 |
| 18915 | 10585002 | <a href="#">ENSMUST00000085560</a> | <a href="#">270163</a>    | muscin IVa                     | <a href="#">Muc6</a>               | 0.813 | -2.425 | 0.0447206  | 0.187121  |

|       |          |                                    |                           |                                |                                    |       |        |             |           |
|-------|----------|------------------------------------|---------------------------|--------------------------------|------------------------------------|-------|--------|-------------|-----------|
| 18915 | 10353772 | <a href="#">ENSMUST0000009309</a>  | <a href="#">270103</a>    | myosin 1Aa                     | <a href="#">Myoza</a>              | 0.813 | -2.423 | 0.0447200   | 0.187121  |
| 18916 | 10354732 | <a href="#">NM_010477</a>          | <a href="#">15510</a>     | heat shock protein 1 (chaperon | <a href="#">Hspd1</a>              | 0.813 | -3.965 | 0.00510723  | 0.041888  |
| 18917 | 10391755 | <a href="#">NM_025918</a>          | <a href="#">52715</a>     | coiled-coil domain containing  | <a href="#">Ccdc43</a>             | 0.813 | -4.599 | 0.00230166  | 0.0240437 |
| 18918 | 10604076 | <a href="#">NR_002900</a>          | <a href="#">104369</a>    | small nucleolar RNA, H/ACA box | <a href="#">Snora69</a>            | 0.813 | -1.76  | 0.120567    | 0.346982  |
| 18919 | 10452935 | <a href="#">BC019508</a>           | <a href="#">320473</a>    | HEAT repeat containing 5B      | <a href="#">Heatr5b</a>            | 0.813 | -2.287 | 0.0550015   | 0.213975  |
| 18920 | 10517673 | <a href="#">NM_021358</a>          | <a href="#">15565</a>     | 5-hydroxytryptamine (serotonin | <a href="#">Htr6</a>               | 0.813 | -2.425 | 0.044728    | 0.187121  |
| 18921 | 10547200 |                                    |                           |                                |                                    | 0.813 | -3.437 | 0.010394    | 0.0698131 |
| 18922 | 10575019 | <a href="#">ENSMUST00000098440</a> | <a href="#">100038487</a> | predicted gene, ENSMUSG0000007 | <a href="#">ENSMUSG00000074113</a> | 0.813 | -1.172 | 0.278469    | 0.553444  |
| 18923 | 10539769 | <a href="#">NM_020045</a>          | <a href="#">56748</a>     | NFU1 iron-sulfur cluster scaff | <a href="#">Nfu1</a>               | 0.813 | -5     | 0.00143249  | 0.0168502 |
| 18924 | 10435991 | <a href="#">XR_034995</a>          | <a href="#">385905</a>    | similar to proteasome alpha7/C | <a href="#">LOC385905</a>          | 0.813 | -1.856 | 0.104514    | 0.318143  |
| 18925 | 10392910 | <a href="#">BC024617</a>           | <a href="#">217310</a>    | RIKEN cDNA C630004H02 gene     | <a href="#">C630004H02Rik</a>      | 0.813 | -2.583 | 0.035376    | 0.160238  |
| 18926 | 10424050 | <a href="#">NM_019480</a>          | <a href="#">55960</a>     | estrogen receptor-binding frag | <a href="#">Ebag9</a>              | 0.813 | -3.091 | 0.016908    | 0.0979462 |
| 18927 | 10578615 | <a href="#">NM_023503</a>          | <a href="#">69260</a>     | inhibitor of growth family, me | <a href="#">Ing2</a>               | 0.813 | -3.007 | 0.0190699   | 0.106221  |
| 18928 | 10364194 | <a href="#">NM_146006</a>          | <a href="#">16987</a>     | lanosterol synthase            | <a href="#">Lss</a>                | 0.812 | -3.633 | 0.00794895  | 0.057744  |
| 18929 | 10579479 | <a href="#">NM_010150</a>          | <a href="#">13864</a>     | nuclear receptor subfamily 2,  | <a href="#">Nr2f6</a>              | 0.812 | -3.773 | 0.00658698  | 0.0502789 |
| 18930 | 10385052 | <a href="#">NM_023146</a>          | <a href="#">66011</a>     | RAN binding protein 17         | <a href="#">Ranbp17</a>            | 0.812 | -2.41  | 0.0457808   | 0.189542  |
| 18931 | 10350504 |                                    |                           |                                |                                    | 0.812 | -3.067 | 0.0174857   | 0.0999956 |
| 18932 | 10540231 |                                    |                           |                                |                                    | 0.812 | -1.745 | 0.123302    | 0.351408  |
| 18933 | 10438103 | <a href="#">NM_029779</a>          | <a href="#">76872</a>     | coiled-coil domain containing  | <a href="#">Ccdc116</a>            | 0.812 | -3.924 | 0.00539149  | 0.0436105 |
| 18934 | 10346255 | <a href="#">NM_145517</a>          | <a href="#">227102</a>    | ORM1-like 1 (S. cerevisiae)    | <a href="#">Ormdl1</a>             | 0.812 | -3.398 | 0.010972    | 0.0722269 |
| 18935 | 10475211 | <a href="#">NM_025475</a>          | <a href="#">66296</a>     | centrosomal protein 27         | <a href="#">Cep27</a>              | 0.812 | -5.138 | 0.00122449  | 0.0152338 |
| 18936 | 10388707 | <a href="#">NM_009965</a>          | <a href="#">12957</a>     | crystallin, beta A1            | <a href="#">Cryba1</a>             | 0.812 | -2.076 | 0.0753386   | 0.259592  |
| 18937 | 10492748 | <a href="#">NM_010196</a>          | <a href="#">14161</a>     | fibrinogen, alpha polypeptide  | <a href="#">Fga</a>                | 0.812 | -3.581 | 0.00852899  | 0.0605564 |
| 18938 | 10450914 | <a href="#">NM_146488</a>          | <a href="#">258481</a>    | olfactory receptor 137         | <a href="#">Olf137</a>             | 0.812 | -1.087 | 0.311974    | 0.588349  |
| 18939 | 10539435 | <a href="#">NM_175277</a>          | <a href="#">78653</a>     | bolaA-like 3 (E. coli)         | <a href="#">Bola3</a>              | 0.812 | -3.454 | 0.0101426   | 0.0686695 |
| 18940 | 10458183 | <a href="#">NM_010280</a>          | <a href="#">14587</a>     | glial cell line derived neurot | <a href="#">Gfra3</a>              | 0.812 | -1.475 | 0.182449    | 0.438923  |
| 18941 | 10602704 | <a href="#">NM_173780</a>          | <a href="#">245671</a>    | Kruppel-like factor 8          | <a href="#">Klf8</a>               | 0.811 | -3.717 | 0.00709414  | 0.053191  |
| 18942 | 10398442 | <a href="#">AJ517767</a>           | <a href="#">373070</a>    | miRNA containing gene          | <a href="#">Mirg</a>               | 0.811 | -1.727 | 0.126485    | 0.356138  |
| 18943 | 10372988 | <a href="#">NM_011391</a>          | <a href="#">20503</a>     | solute carrier family 16 (mono | <a href="#">Slc16a7</a>            | 0.811 | -1.606 | 0.15114     | 0.395116  |
| 18944 | 10503615 |                                    |                           |                                |                                    | 0.811 | -2.396 | 0.0466937   | 0.191982  |
| 18945 | 10363130 | <a href="#">BC028546</a>           | <a href="#">94221</a>     | golgi associated PDZ and coile | <a href="#">Gopc</a>               | 0.811 | -2.08  | 0.0748944   | 0.258922  |
| 18946 | 10594480 | <a href="#">NM_017382</a>          | <a href="#">53869</a>     | RAB11a, member RAS oncogene fa | <a href="#">Rab11a</a>             | 0.811 | -3.518 | 0.0092909   | 0.0644811 |
| 18947 | 10461354 | <a href="#">NM_197993</a>          | <a href="#">70044</a>     | terminal uridylyl transferase  | <a href="#">Tut1</a>               | 0.811 | -3.256 | 0.013365    | 0.0831391 |
| 18948 | 10363743 | <a href="#">NM_001081346</a>       | <a href="#">170799</a>    | rhotekin 2                     | <a href="#">Rtkn2</a>              | 0.811 | -2.937 | 0.0210747   | 0.113588  |
| 18949 | 10396278 | <a href="#">NM_026102</a>          | <a href="#">208846</a>    | dishevelled associated activat | <a href="#">Daam1</a>              | 0.811 | -2.727 | 0.0286445   | 0.138945  |
| 18950 | 10477777 | <a href="#">NM_025516</a>          | <a href="#">66366</a>     | ERGIC and golgi 3              | <a href="#">Ergic3</a>             | 0.811 | -4.655 | 0.00215123  | 0.0229481 |
| 18951 | 10427052 | <a href="#">NM_033073</a>          | <a href="#">110310</a>    | keratin 7                      | <a href="#">Krt7</a>               | 0.811 | -1.536 | 0.167199    | 0.418175  |
| 18952 | 10507784 | <a href="#">NM_008917</a>          | <a href="#">19063</a>     | palmitoyl-protein thioesterase | <a href="#">Ppt1</a>               | 0.811 | -3.91  | 0.005492    | 0.0441924 |
| 18953 | 10538082 | <a href="#">NM_133764</a>          | <a href="#">76252</a>     | ATPase, H+ transporting, lysos | <a href="#">Atp6v0e2</a>           | 0.811 | -2.859 | 0.0236194   | 0.122374  |
| 18954 | 10551939 | <a href="#">NM_019546</a>          | <a href="#">56189</a>     | proline dehydrogenase (oxidase | <a href="#">Prodh2</a>             | 0.811 | -3.108 | 0.0164956   | 0.096349  |
| 18955 | 10493612 | <a href="#">NM_025762</a>          | <a href="#">99650</a>     | RIKEN cDNA 4933434E20 gene     | <a href="#">4933434E20Rik</a>      | 0.811 | -4.371 | 0.00304659  | 0.0290606 |
| 18956 | 10518108 | <a href="#">NM_145402</a>          | <a href="#">214359</a>    | transmembrane protein 51       | <a href="#">Tmem51</a>             | 0.811 | -3.807 | 0.00629427  | 0.0485716 |
| 18957 | 10456490 |                                    |                           |                                |                                    | 0.811 | -1.735 | 0.125131    | 0.354186  |
| 18958 | 10514926 | <a href="#">ENSMUST00000097930</a> | <a href="#">619295</a>    | RIKEN cDNA B230314M03 gene     | <a href="#">B230314M03Rik</a>      | 0.811 | -2.559 | 0.0366662   | 0.163801  |
| 18959 | 10433214 | <a href="#">NM_001081217</a>       | <a href="#">385674</a>    | zinc finger protein 174        | <a href="#">Zfp174</a>             | 0.811 | -1.91  | 0.096546    | 0.302425  |
| 18960 | 10462521 | <a href="#">NM_008960</a>          | <a href="#">19211</a>     | phosphatase and tensin homolog | <a href="#">Pten</a>               | 0.811 | -2.853 | 0.0237994   | 0.123126  |
| 18961 | 10462702 | <a href="#">NM_172637</a>          | <a href="#">226098</a>    | HECT domain containing 2       | <a href="#">Hectd2</a>             | 0.811 | -1.619 | 0.148298    | 0.390488  |
| 18962 | 10440338 | <a href="#">ENSMUST00000072455</a> | <a href="#">73946</a>     | RIKEN cDNA 4930423O20 gene     | <a href="#">4930423O20Rik</a>      | 0.811 | -2.253 | 0.0578867   | 0.220652  |
| 18963 | 10387816 | <a href="#">NM_173742</a>          | <a href="#">52898</a>     | ribonuclease, RNase K          | <a href="#">Rnasek</a>             | 0.811 | -3.541 | 0.00901109  | 0.063027  |
| 18964 | 10566477 | <a href="#">NM_017371</a>          | <a href="#">15458</a>     | hemopexin                      | <a href="#">Hpx</a>                | 0.81  | -2.655 | 0.0318078   | 0.149238  |
| 18965 | 10592099 | <a href="#">NM_027030</a>          | <a href="#">69305</a>     | decapping enzyme, scavenger    | <a href="#">Dcps</a>               | 0.81  | -5.376 | 0.000937969 | 0.0125681 |
| 18966 | 10447923 | <a href="#">NM_022311</a>          | <a href="#">21646</a>     | t-complex-associated testis ex | <a href="#">Tcte2</a>              | 0.81  | -4.036 | 0.00466003  | 0.039162  |
| 18967 | 10375232 |                                    |                           |                                |                                    | 0.81  | -1.978 | 0.0871716   | 0.284169  |

|       |          |                                    |                           |                                    |                                    |       |        |            |           |
|-------|----------|------------------------------------|---------------------------|------------------------------------|------------------------------------|-------|--------|------------|-----------|
| 18968 | 10542239 | <a href="#">NM_031499</a>          | <a href="#">83380</a>     | proline rich protein 2             | <a href="#">Prp2</a>               | 0.81  | -0.83  | 0.433036   | 0.693487  |
| 18969 | 10351998 | <a href="#">AK142791</a>           | <a href="#">100093628</a> | predicted gene,<br>ENSMUSG0000007  | <a href="#">ENSMUSG00000073488</a> | 0.81  | -1.381 | 0.208447   | 0.4731    |
| 18970 | 10590306 | <a href="#">NM_178676</a>          | <a href="#">215446</a>    | ectonucleoside triphosphate di     | <a href="#">Entpd3</a>             | 0.81  | -2.594 | 0.034806   | 0.158375  |
| 18971 | 10444578 | <a href="#">NM_010893</a>          | <a href="#">18010</a>     | neuraminidase 1                    | <a href="#">Neu1</a>               | 0.81  | -2.088 | 0.0740746  | 0.257223  |
| 18972 | 10350800 | <a href="#">NM_172843</a>          | <a href="#">240832</a>    | torsin A interacting protein 2     | <a href="#">Tor1aip2</a>           | 0.81  | -3.436 | 0.0104099  | 0.0698973 |
| 18973 | 10495651 | <a href="#">NM_024178</a>          | <a href="#">66789</a>     | asparagine-linked glycosylation    | <a href="#">Alg14</a>              | 0.81  | -2.56  | 0.0366491  | 0.163763  |
| 18974 | 10576896 | <a href="#">XM_001473319</a>       | <a href="#">669393</a>    | similar to ribosomal protein L     | <a href="#">LOC669393</a>          | 0.81  | -2.771 | 0.0268473  | 0.133319  |
| 18975 | 10581479 | <a href="#">NM_021491</a>          | <a href="#">58994</a>     | sphingomyelin phosphodiesteras     | <a href="#">Smpd3</a>              | 0.81  | -1.791 | 0.115147   | 0.337402  |
| 18976 | 10596428 | <a href="#">NM_026763</a>          | <a href="#">68553</a>     | RIKEN cDNA 1110001D15<br>gene      | <a href="#">1110001D15Rik</a>      | 0.81  | -1.199 | 0.26831    | 0.542786  |
| 18977 | 10403428 | <a href="#">NM_172585</a>          | <a href="#">217980</a>    | La ribonucleoprotein domain fa     | <a href="#">Larp5</a>              | 0.81  | -4.938 | 0.00154001 | 0.0177449 |
| 18978 | 10477946 | <a href="#">NM_019642</a>          | <a href="#">20014</a>     | ribophorin II                      | <a href="#">Rpn2</a>               | 0.81  | -3.775 | 0.0065626  | 0.0501236 |
| 18979 | 10606542 |                                    |                           |                                    |                                    | 0.81  | -1.654 | 0.14089    | 0.379749  |
| 18980 | 10418500 | <a href="#">ENSMUST00000049732</a> | <a href="#">66487</a>     | small nucleolar RNA host gene      | <a href="#">Snhg8</a>              | 0.81  | -5.061 | 0.00133556 | 0.0161644 |
| 18981 | 10364375 | <a href="#">NM_007793</a>          | <a href="#">13014</a>     | cystatin B                         | <a href="#">Cstb</a>               | 0.81  | -4.67  | 0.00211369 | 0.022662  |
| 18982 | 10528480 | <a href="#">ENSMUST00000079716</a> | <a href="#">100042067</a> | similar to Rpl17 protein           | <a href="#">LOC100042067</a>       | 0.81  | -4.214 | 0.003711   | 0.0331918 |
| 18983 | 10427910 | <a href="#">NM_001013792</a>       | <a href="#">432940</a>    | cDNA sequence BC087945             | <a href="#">BC087945</a>           | 0.81  | -3.748 | 0.00681085 | 0.0514316 |
| 18984 | 10490632 | <a href="#">NM_183162</a>          | <a href="#">229003</a>    | cDNA sequence BC006779             | <a href="#">BC006779</a>           | 0.81  | -3.483 | 0.00974959 | 0.0668869 |
| 18985 | 10462535 | <a href="#">NM_177096</a>          | <a href="#">320193</a>    | RIKEN cDNA B430203M17<br>gene      | <a href="#">B430203M17Rik</a>      | 0.81  | -1.416 | 0.198567   | 0.459606  |
| 18986 | 10522589 | <a href="#">NM_020611</a>          | <a href="#">57357</a>     | steroid 5 alpha-reductase 3        | <a href="#">Srd5a3</a>             | 0.81  | -3.353 | 0.0116745  | 0.0754648 |
| 18987 | 10451079 | <a href="#">ENSMUST00000052701</a> | <a href="#">75341</a>     | RIKEN cDNA 4930564C03<br>gene      | <a href="#">4930564C03Rik</a>      | 0.809 | -3.317 | 0.0122795  | 0.0779924 |
| 18988 | 10369531 | <a href="#">NM_197996</a>          | <a href="#">70423</a>     | tetraspanin 15                     | <a href="#">Tspan15</a>            | 0.809 | -2.283 | 0.0553186  | 0.214616  |
| 18989 | 10594340 | <a href="#">NM_172446</a>          | <a href="#">207667</a>    | ladybird homeobox 1 homolog<br>(D) | <a href="#">Lbxcor1</a>            | 0.809 | -2.208 | 0.0618285  | 0.229795  |
| 18990 | 10399005 | <a href="#">NM_007763</a>          | <a href="#">12925</a>     | cysteine-rich protein 1 (intes     | <a href="#">Crip1</a>              | 0.809 | -3.375 | 0.0113208  | 0.0737193 |
| 18991 | 10568464 | <a href="#">NM_013799</a>          | <a href="#">11907</a>     | arginine-tRNA-protein transfer     | <a href="#">Ate1</a>               | 0.809 | -4.661 | 0.0021362  | 0.0228467 |
| 18992 | 10545239 |                                    |                           |                                    |                                    | 0.809 | -1.385 | 0.207468   | 0.471907  |
| 18993 | 10478066 | <a href="#">NM_175692</a>          | <a href="#">319317</a>    | RIKEN cDNA A930034L06<br>gene      | <a href="#">A930034L06Rik</a>      | 0.809 | -2.227 | 0.0601099  | 0.225949  |
| 18994 | 10517373 | <a href="#">NM_022980</a>          | <a href="#">53902</a>     | regulator of calcineurin 3         | <a href="#">Rean3</a>              | 0.809 | -2.675 | 0.0308956  | 0.146635  |
| 18995 | 10590479 | <a href="#">BC119591</a>           | <a href="#">382118</a>    | zinc finger protein 167            | <a href="#">Zfp167</a>             | 0.809 | -2.512 | 0.0393067  | 0.171999  |
| 18996 | 10506054 | <a href="#">ENSMUST00000062256</a> | <a href="#">78687</a>     | RIKEN cDNA 0610025J13 gene         | <a href="#">0610025J13Rik</a>      | 0.809 | -3.882 | 0.0056971  | 0.0453196 |
| 18997 | 10514461 | <a href="#">ENSMUST00000064804</a> | <a href="#">791416</a>    | predicted gene,<br>OTTMUSG0000000  | <a href="#">OTTMUSG00000008033</a> | 0.809 | -2.045 | 0.0789215  | 0.267465  |
| 18998 | 10489204 | <a href="#">NM_009373</a>          | <a href="#">21817</a>     | transglutaminase 2, C polypept     | <a href="#">Tgm2</a>               | 0.809 | -1.748 | 0.122785   | 0.350597  |
| 18999 | 10440238 | <a href="#">NM_178925</a>          | <a href="#">106338</a>    | NOL1/NOP2/Sun domain family<br>3   | <a href="#">Nsun3</a>              | 0.809 | -3.445 | 0.0102818  | 0.0693232 |
| 19000 | 10398336 |                                    |                           |                                    |                                    | 0.809 | -2.202 | 0.0624392  | 0.231292  |
| 19001 | 10595447 |                                    |                           |                                    |                                    | 0.809 | -2.449 | 0.0431532  | 0.182497  |
| 19002 | 10579554 | <a href="#">NM_001029873</a>       | <a href="#">382018</a>    | unc-13 homolog A (C. elegans)      | <a href="#">Unc13a</a>             | 0.809 | -3.109 | 0.0164675  | 0.0962891 |
| 19003 | 10457729 | <a href="#">ENSMUST00000025187</a> | <a href="#">13505</a>     | desmocollin 1                      | <a href="#">Dsc1</a>               | 0.809 | -2.68  | 0.0306787  | 0.145769  |
| 19004 | 10396740 | <a href="#">NM_172952</a>          | <a href="#">268566</a>    | gephyrin                           | <a href="#">Gphn</a>               | 0.809 | -4.508 | 0.0025717  | 0.0259383 |
| 19005 | 10507976 | <a href="#">NM_153566</a>          | <a href="#">230734</a>    | yrdC domain containing (E.coli     | <a href="#">Yrde</a>               | 0.809 | -2.207 | 0.0619429  | 0.230018  |
| 19006 | 10570630 | <a href="#">XR_031858</a>          | <a href="#">244335</a>    | similar to Ia related protein      | <a href="#">LOC244335</a>          | 0.809 | -2.852 | 0.0238335  | 0.123212  |
| 19007 | 10353667 |                                    |                           |                                    |                                    | 0.808 | -0.896 | 0.399162   | 0.665449  |
| 19008 | 10543369 | <a href="#">NM_153163</a>          | <a href="#">320405</a>    | Ca2+-dependent activator prote     | <a href="#">Cadps2</a>             | 0.808 | -1.85  | 0.105545   | 0.320207  |
| 19009 | 10602166 | <a href="#">NM_172782</a>          | <a href="#">237082</a>    | nuclear transport factor 2-lik     | <a href="#">Nxt2</a>               | 0.808 | -3.754 | 0.0067553  | 0.0512317 |
| 19010 | 10376094 |                                    |                           |                                    |                                    | 0.808 | -4.607 | 0.00227946 | 0.0239191 |
| 19011 | 10359826 | <a href="#">NM_025650</a>          | <a href="#">66594</a>     | ubiquinol-cytochrome c reducta     | <a href="#">Uqcrr</a>              | 0.808 | -2.953 | 0.0206132  | 0.112225  |
| 19012 | 10361366 | <a href="#">NM_175374</a>          | <a href="#">108853</a>    | mitochondrial translational re     | <a href="#">Mtrf11</a>             | 0.808 | -3.711 | 0.0071489  | 0.0534688 |
| 19013 | 10600471 |                                    |                           |                                    |                                    | 0.808 | -1.714 | 0.128923   | 0.36017   |
| 19014 | 10403396 | <a href="#">NM_052977</a>          | <a href="#">94191</a>     | adenosine deaminase, RNA-<br>speci | <a href="#">Adarb2</a>             | 0.808 | -2.476 | 0.0414651  | 0.177622  |
| 19015 | 10556037 | <a href="#">NM_147033</a>          | <a href="#">259035</a>    | olfactory receptor 714             | <a href="#">Olfr714</a>            | 0.808 | -3.561 | 0.00876476 | 0.0618152 |
| 19016 | 10485395 | <a href="#">NM_020267</a>          | <a href="#">80985</a>     | tripartite motif-containing 44     | <a href="#">Trim44</a>             | 0.808 | -3.999 | 0.00488565 | 0.0405743 |

|       |          |                                    |                           |                                |                                    |       |        |             |           |
|-------|----------|------------------------------------|---------------------------|--------------------------------|------------------------------------|-------|--------|-------------|-----------|
| 19017 | 10552827 | <a href="#">ENSMUST0000016534</a>  | <a href="#">319266</a>    | RIKEN cDNA A130010J15 gene     | <a href="#">A130010J15Rik</a>      | 0.808 | -2.793 | 0.0260038   | 0.130662  |
| 19018 | 10591643 | <a href="#">NM_031874</a>          | <a href="#">19340</a>     | RAB3D, member RAS oncogene fam | <a href="#">Rab3d</a>              | 0.808 | -2.838 | 0.0243446   | 0.125119  |
| 19019 | 10415176 | <a href="#">NM_030686</a>          | <a href="#">28200</a>     | dehydrogenase/reductase (SDR f | <a href="#">Dhrs4</a>              | 0.808 | -4.079 | 0.00440785  | 0.0374898 |
| 19020 | 10495111 | <a href="#">NM_027432</a>          | <a href="#">70465</a>     | WD repeat domain 77            | <a href="#">Wdr77</a>              | 0.808 | -4.605 | 0.00228507  | 0.0239423 |
| 19021 | 10482766 | <a href="#">NM_023396</a>          | <a href="#">67874</a>     | reprim, TP53 dependent G2 arr  | <a href="#">Rprm</a>               | 0.808 | -2.791 | 0.0260724   | 0.130789  |
| 19022 | 10434815 | <a href="#">NM_011641</a>          | <a href="#">22061</a>     | transformation related protein | <a href="#">Trp63</a>              | 0.808 | -3.199 | 0.0145022   | 0.0882145 |
| 19023 | 10602716 | <a href="#">NM_018798</a>          | <a href="#">54609</a>     | ubiquilin 2                    | <a href="#">Ubqln2</a>             | 0.808 | -5.047 | 0.00135843  | 0.0163206 |
| 19024 | 10544333 | <a href="#">NM_001003405</a>       | <a href="#">435889</a>    | RIKEN cDNA 1810049H19 gene     | <a href="#">1810049H19Rik</a>      | 0.808 | -2.006 | 0.0836458   | 0.277081  |
| 19025 | 10606658 | <a href="#">BC056937</a>           | <a href="#">215201</a>    | RIKEN cDNA 4732479N06 gene     | <a href="#">4732479N06Rik</a>      | 0.808 | -2.31  | 0.0530866   | 0.208947  |
| 19026 | 10424584 | <a href="#">NM_001081066</a>       | <a href="#">105841</a>    | DENN/MADD domain containing 3  | <a href="#">Dennd3</a>             | 0.807 | -3.64  | 0.00786999  | 0.057321  |
| 19027 | 10585206 | <a href="#">NM_028300</a>          | <a href="#">72614</a>     | PIH1 domain containing 2       | <a href="#">Pih1d2</a>             | 0.807 | -2.931 | 0.0212565   | 0.114131  |
| 19028 | 10586347 | <a href="#">NM_177460</a>          | <a href="#">214424</a>    | poly (ADP-ribose) polymerase f | <a href="#">Parp16</a>             | 0.807 | -2.251 | 0.0579903   | 0.220908  |
| 19029 | 10579825 | <a href="#">NM_138944</a>          | <a href="#">18997</a>     | POU domain, class 4, transcrip | <a href="#">Pou4f2</a>             | 0.807 | -2.378 | 0.048019    | 0.195553  |
| 19030 | 10373036 | <a href="#">NM_177614</a>          | <a href="#">216440</a>    | amplified in osteosarcoma      | <a href="#">Os9</a>                | 0.807 | -4.257 | 0.00351251  | 0.0318203 |
| 19031 | 10543067 | <a href="#">NM_012055</a>          | <a href="#">27053</a>     | asparagine synthetase          | <a href="#">Asns</a>               | 0.807 | -3.398 | 0.0109648   | 0.0722269 |
| 19032 | 10553401 | <a href="#">AK157552</a>           | <a href="#">100038585</a> | predicted gene, ENSMUSG0000007 | <a href="#">ENSMUSG00000074104</a> | 0.807 | -4.706 | 0.00202403  | 0.0218682 |
| 19033 | 10475378 | <a href="#">NM_177054</a>          | <a href="#">319996</a>    | cancer susceptibility candidat | <a href="#">Casc4</a>              | 0.807 | -2.508 | 0.0395667   | 0.172766  |
| 19034 | 10405280 | <a href="#">NM_019968</a>          | <a href="#">56795</a>     | ADP-ribosylation factor-like 1 | <a href="#">Arl10</a>              | 0.807 | -2.958 | 0.0204418   | 0.111772  |
| 19035 | 10562643 | <a href="#">NM_027702</a>          | <a href="#">71162</a>     | RIKEN cDNA 4933421I07 gene     | <a href="#">4933421I07Rik</a>      | 0.807 | -2.116 | 0.0710132   | 0.250191  |
| 19036 | 10518743 | <a href="#">NM_173371</a>          | <a href="#">100198</a>    | hexose-6-phosphate dehydrogena | <a href="#">H6pd</a>               | 0.807 | -3.254 | 0.0134037   | 0.0833309 |
| 19037 | 10353032 | <a href="#">NM_026632</a>          | <a href="#">68240</a>     | replication protein A3         | <a href="#">Rpa3</a>               | 0.807 | -3.481 | 0.0097812   | 0.0669951 |
| 19038 | 10559312 | <a href="#">NM_007856</a>          | <a href="#">13360</a>     | 7-dehydrocholesterol reductase | <a href="#">Dhcr7</a>              | 0.807 | -4.076 | 0.00442514  | 0.0375626 |
| 19039 | 10598996 | <a href="#">NM_198633</a>          | <a href="#">331392</a>    | predicted gene, EG331392       | <a href="#">EG331392</a>           | 0.806 | -1.983 | 0.0865813   | 0.282817  |
| 19040 | 10432682 | <a href="#">NM_028770</a>          | <a href="#">74127</a>     | keratin 80                     | <a href="#">Krt80</a>              | 0.806 | -3.715 | 0.00711202  | 0.0532572 |
| 19041 | 10357120 |                                    |                           |                                |                                    | 0.806 | -2.128 | 0.0697473   | 0.247552  |
| 19042 | 10415011 |                                    |                           |                                |                                    | 0.806 | -1.587 | 0.15534     | 0.400794  |
| 19043 | 10404731 | <a href="#">NM_025387</a>          | <a href="#">66154</a>     | transmembrane protein 14C      | <a href="#">Tmem14c</a>            | 0.806 | -1.879 | 0.101091    | 0.311356  |
| 19044 | 10405462 | <a href="#">BC038268</a>           | <a href="#">100038756</a> | predicted gene, ENSMUSG0000007 | <a href="#">ENSMUSG00000074889</a> | 0.806 | -3.26  | 0.0133053   | 0.0828894 |
| 19045 | 10558687 | <a href="#">NM_029821</a>          | <a href="#">76974</a>     | RIKEN cDNA 1190003J15 gene     | <a href="#">1190003J15Rik</a>      | 0.806 | -2.264 | 0.0569036   | 0.218163  |
| 19046 | 10450075 | <a href="#">NM_001001892</a>       | <a href="#">14972</a>     | histocompatibility 2, K1, K re | <a href="#">H2-K1</a>              | 0.806 | -4.2   | 0.00377495  | 0.0335227 |
| 19047 | 10425116 | <a href="#">NM_027219</a>          | <a href="#">104445</a>    | CDC42 effector protein (Rho GT | <a href="#">Cdc42ep1</a>           | 0.806 | -2.515 | 0.0391547   | 0.171547  |
| 19048 | 10505705 | <a href="#">NM_019535</a>          | <a href="#">20404</a>     | SH3-domain GRB2-like 2         | <a href="#">Sh3gl2</a>             | 0.806 | -5.526 | 0.000796019 | 0.0111983 |
| 19049 | 10378253 | <a href="#">NM_018883</a>          | <a href="#">55984</a>     | calcium/calmodulin-dependent p | <a href="#">Camkk1</a>             | 0.806 | -2.211 | 0.0616067   | 0.229333  |
| 19050 | 10558257 | <a href="#">NM_173410</a>          | <a href="#">233919</a>    | G protein-coupled receptor 26  | <a href="#">Gpr26</a>              | 0.806 | -2.339 | 0.0508925   | 0.203376  |
| 19051 | 10456140 | <a href="#">NM_172628</a>          | <a href="#">225608</a>    | SH3 domain and tetratricopepti | <a href="#">Sh3tc2</a>             | 0.806 | -2.168 | 0.0656474   | 0.238799  |
| 19052 | 10530492 | <a href="#">AK164247</a>           | <a href="#">100978</a>    | nuclear transcription factor,  | <a href="#">Nfx11</a>              | 0.806 | -4.42  | 0.00286469  | 0.0279774 |
| 19053 | 10523058 | <a href="#">ENSMUST00000108609</a> | <a href="#">276770</a>    | eukaryotic translation initiat | <a href="#">Eif5a</a>              | 0.806 | -3.401 | 0.0109243   | 0.0720425 |
| 19054 | 10353775 | <a href="#">BC057378</a>           | <a href="#">320705</a>    | RIKEN cDNA B230209C24 gene     | <a href="#">B230209C24Rik</a>      | 0.806 | -2.997 | 0.0193341   | 0.107268  |
| 19055 | 10367400 | <a href="#">NM_021412</a>          | <a href="#">58223</a>     | matrix metalloproteinase 19    | <a href="#">Mmp19</a>              | 0.806 | -2.646 | 0.0322397   | 0.150768  |
| 19056 | 10491083 | <a href="#">NM_178772</a>          | <a href="#">320024</a>    | arylacetamide deacetylase-like | <a href="#">Aadacl1</a>            | 0.806 | -3.377 | 0.0112928   | 0.0735824 |
| 19057 | 10477297 | <a href="#">NM_008444</a>          | <a href="#">16569</a>     | kinesin family member 3B       | <a href="#">Kif3b</a>              | 0.805 | -3.496 | 0.00957801  | 0.0659022 |
| 19058 | 10468419 | <a href="#">XM_129357</a>          | <a href="#">70806</a>     | DNA segment, Chr 19, ERATO Doi | <a href="#">D19Ert652e</a>         | 0.805 | -3.173 | 0.0150272   | 0.0904973 |
| 19059 | 10548585 | <a href="#">NM_139117</a>          | <a href="#">56449</a>     | cold shock domain protein A    | <a href="#">Csda</a>               | 0.805 | -4.642 | 0.00218621  | 0.0232055 |
| 19060 | 10601844 | <a href="#">NM_198161</a>          | <a href="#">70237</a>     | basic helix-loop-helix domain  | <a href="#">Bhlhb9</a>             | 0.805 | -5.256 | 0.00107207  | 0.0137798 |
| 19061 | 10491477 | <a href="#">NM_011443</a>          | <a href="#">20674</a>     | SRY-box containing gene 2      | <a href="#">Sox2</a>               | 0.805 | -2.64  | 0.0325574   | 0.151595  |
| 19062 | 10380415 | <a href="#">BC094502</a>           | <a href="#">216150</a>    | cell division cycle 34 homolog | <a href="#">Cdc34</a>              | 0.805 | -1.603 | 0.151736    | 0.395645  |
| 19063 | 10399330 | <a href="#">NM_145441</a>          | <a href="#">217379</a>    | UBX domain containing 4        | <a href="#">Ubx4</a>               | 0.805 | -3.382 | 0.0112185   | 0.0733781 |
| 19064 | 10579307 | <a href="#">BC048938</a>           | <a href="#">75620</a>     | RIKEN cDNA 2810422J05 gene     | <a href="#">2810422J05Rik</a>      | 0.805 | -4.33  | 0.00320372  | 0.0299943 |
| 19065 | 10483249 | <a href="#">NM_015736</a>          | <a href="#">14425</a>     | UDP-N-acetyl-alpha-D-galactosa | <a href="#">Galnt3</a>             | 0.805 | -2.62  | 0.0335279   | 0.154383  |
| 19066 | 10603485 | <a href="#">NM_007898</a>          | <a href="#">13595</a>     | phenylalkylamine Ca2+ antagoni | <a href="#">Ebp</a>                | 0.805 | -3.194 | 0.0146006   | 0.0885588 |
| 19067 | 10378914 | <a href="#">NM_011586</a>          | <a href="#">360013</a>    | mvosin XVIIIa                  | <a href="#">Mvo18a</a>             | 0.805 | -4.595 | 0.0023121   | 0.024106  |

|       |          |                                    |                           |                                  |                                    |       |        |             |            |
|-------|----------|------------------------------------|---------------------------|----------------------------------|------------------------------------|-------|--------|-------------|------------|
| 19068 | 10542993 | <a href="#">NM_173006</a>          | <a href="#">269823</a>    | paraoxonase 3                    | <a href="#">Pon3</a>               | 0.805 | -2.079 | 0.0750337   | 0.259023   |
| 19069 | 10474171 | <a href="#">NM_010125</a>          | <a href="#">13711</a>     | E74-like factor 5                | <a href="#">Elf5</a>               | 0.805 | -2.383 | 0.0476072   | 0.194363   |
| 19070 | 10525665 | <a href="#">XM_915492</a>          | <a href="#">208908</a>    | coiled-coil domain containing    | <a href="#">Cede62</a>             | 0.805 | -2.027 | 0.0811132   | 0.271716   |
| 19071 | 10428983 | <a href="#">BC011343</a>           | <a href="#">223601</a>    | RIKEN cDNA 0910001A06 gene       | <a href="#">0910001A06Rik</a>      | 0.804 | -5.965 | 0.000501179 | 0.00810782 |
| 19072 | 10520003 | <a href="#">NM_026034</a>          | <a href="#">67211</a>     | armadillo repeat containing 10   | <a href="#">Armc10</a>             | 0.804 | -2.572 | 0.03597     | 0.16175    |
| 19073 | 10434806 | <a href="#">ENSMUST00000078988</a> | <a href="#">210126</a>    | LIM domain containing preferre   | <a href="#">Lpp</a>                | 0.804 | -2.557 | 0.0367997   | 0.164259   |
| 19074 | 10509127 | <a href="#">NM_024243</a>          | <a href="#">71665</a>     | fucosidase, alpha-L-1, tissue    | <a href="#">Fuca1</a>              | 0.804 | -4.343 | 0.00315466  | 0.0297283  |
| 19075 | 10554629 | <a href="#">NM_175317</a>          | <a href="#">101592</a>    | elongation factor Tu GTP bindi   | <a href="#">Eftud1</a>             | 0.804 | -4.14  | 0.00407379  | 0.035447   |
| 19076 | 10375880 | <a href="#">NM_026631</a>          | <a href="#">52530</a>     | nucleolar protein family A, me   | <a href="#">Nola2</a>              | 0.804 | -5.119 | 0.00125036  | 0.0154515  |
| 19077 | 10590279 | <a href="#">NM_144557</a>          | <a href="#">245049</a>    | myosin VIIA and Rab interactin   | <a href="#">Myrip</a>              | 0.804 | -2.642 | 0.0324315   | 0.151275   |
| 19078 | 10585338 | <a href="#">NM_212445</a>          | <a href="#">68304</a>     | KDEL (Lys-Asp-Glu-Leu) contain   | <a href="#">Kdelc2</a>             | 0.804 | -2.241 | 0.0589049   | 0.223325   |
| 19079 | 10448615 | <a href="#">BC094931</a>           | <a href="#">328778</a>    | RAB26, member RAS oncogene fam   | <a href="#">Rab26</a>              | 0.804 | -3.477 | 0.00983738  | 0.0672709  |
| 19080 | 10493189 | <a href="#">ENSMUST00000104974</a> | <a href="#">17261</a>     | myocyte enhancer factor 2D       | <a href="#">Mef2d</a>              | 0.804 | -3.884 | 0.00568435  | 0.0452369  |
| 19081 | 10393098 | <a href="#">NM_016852</a>          | <a href="#">22378</a>     | WW domain binding protein 2      | <a href="#">Wbp2</a>               | 0.804 | -3.276 | 0.0130082   | 0.0815434  |
| 19082 | 10531653 | <a href="#">BC055321</a>           | <a href="#">231503</a>    | cDNA sequence BC062109           | <a href="#">BC062109</a>           | 0.804 | -2.118 | 0.0707898   | 0.249713   |
| 19083 | 10522301 | <a href="#">AY616753</a>           | <a href="#">433899</a>    | cDNA sequence, AY616753          | <a href="#">AY616753</a>           | 0.804 | -2.045 | 0.0788815   | 0.267427   |
| 19084 | 10575153 | <a href="#">NM_025558</a>          | <a href="#">66427</a>     | cytochrome b5 type B             | <a href="#">Cyb5b</a>              | 0.804 | -4.536 | 0.00248636  | 0.025348   |
| 19085 | 10503184 | <a href="#">NM_001081417</a>       | <a href="#">320790</a>    | chromodomain helicase DNA bind   | <a href="#">Chd7</a>               | 0.804 | -1.622 | 0.147664    | 0.389789   |
| 19086 | 10461154 | <a href="#">AK051045</a>           | <a href="#">83673</a>     | small nucleolar RNA host gene    | <a href="#">Snhg1</a>              | 0.804 | -1.965 | 0.0889881   | 0.287785   |
| 19087 | 10357875 | <a href="#">NM_007570</a>          | <a href="#">12227</a>     | B-cell translocation gene 2, a   | <a href="#">Btg2</a>               | 0.804 | -2.756 | 0.02745     | 0.135323   |
| 19088 | 10368979 |                                    |                           |                                  |                                    | 0.804 | -2.745 | 0.0278898   | 0.136886   |
| 19089 | 10530806 | <a href="#">BC023841</a>           | <a href="#">231327</a>    | phosphoribosyl pyrophosphate a   | <a href="#">Ppat</a>               | 0.804 | -2.576 | 0.0357648   | 0.16117    |
| 19090 | 10546508 |                                    |                           |                                  |                                    | 0.804 | -2.529 | 0.0383243   | 0.169206   |
| 19091 | 10381226 | <a href="#">NM_027896</a>          | <a href="#">71743</a>     | Coenzyme A synthase              | <a href="#">Coasy</a>              | 0.804 | -4.205 | 0.00375202  | 0.0333752  |
| 19092 | 10603492 | <a href="#">NM_016913</a>          | <a href="#">53627</a>     | porcupine homolog (Drosophila)   | <a href="#">Poren</a>              | 0.803 | -3.121 | 0.0161854   | 0.0951945  |
| 19093 | 10462630 | <a href="#">AK019493</a>           | <a href="#">75735</a>     | pantothenate kinase 1            | <a href="#">Pank1</a>              | 0.803 | -2.088 | 0.0739946   | 0.257104   |
| 19094 | 10559698 | <a href="#">AK138915</a>           | <a href="#">381835</a>    | gene model 1078, (NCBI)          | <a href="#">Gm1078</a>             | 0.803 | -2.34  | 0.0507961   | 0.203223   |
| 19095 | 10465651 | <a href="#">NM_007928</a>          | <a href="#">13728</a>     | MAP/microtubule affinity-regul   | <a href="#">Mark2</a>              | 0.803 | -4.209 | 0.00373095  | 0.0332773  |
| 19096 | 10520318 | <a href="#">NM_010075</a>          | <a href="#">13483</a>     | dipeptidylpeptidase 6            | <a href="#">Dpp6</a>               | 0.803 | -3.051 | 0.0178955   | 0.101524   |
| 19097 | 10602426 |                                    |                           |                                  |                                    | 0.803 | -2.089 | 0.0739505   | 0.257004   |
| 19098 | 10557231 | <a href="#">XR_034502</a>          | <a href="#">628696</a>    | similar to ribosomal protein L   | <a href="#">LOC628696</a>          | 0.803 | -1.294 | 0.235583    | 0.50735    |
| 19099 | 10565479 | <a href="#">NM_026304</a>          | <a href="#">67669</a>     | lethal, Chr 7, Rinchik 6         | <a href="#">l7Rn6</a>              | 0.803 | -3.654 | 0.00772498  | 0.0566946  |
| 19100 | 10519578 | <a href="#">NM_008830</a>          | <a href="#">18670</a>     | ATP-binding cassette, sub-fami   | <a href="#">Abcb4</a>              | 0.803 | -2.176 | 0.0649156   | 0.237571   |
| 19101 | 10426594 | <a href="#">NM_146280</a>          | <a href="#">258277</a>    | olfactory receptor 281           | <a href="#">Olfr281</a>            | 0.803 | -1.461 | 0.186131    | 0.444356   |
| 19102 | 10494753 |                                    |                           |                                  |                                    | 0.803 | -4.437 | 0.0028079   | 0.0275884  |
| 19103 | 10351179 | <a href="#">BC050143</a>           | <a href="#">69962</a>     | RIKEN cDNA 2810422O20 gene       | <a href="#">2810422O20Rik</a>      | 0.803 | -2.943 | 0.0209144   | 0.113291   |
| 19104 | 10422707 | <a href="#">NM_001013367</a>       | <a href="#">105787</a>    | protein kinase, AMP-activated,   | <a href="#">Prkaa1</a>             | 0.803 | -4.26  | 0.00350044  | 0.0317517  |
| 19105 | 10394862 | <a href="#">NM_001098168</a>       | <a href="#">211914</a>    | development and differentiatio   | <a href="#">Ddef2</a>              | 0.803 | -3.413 | 0.0107412   | 0.0713743  |
| 19106 | 10398404 |                                    |                           |                                  |                                    | 0.803 | -2.243 | 0.0587068   | 0.222894   |
| 19107 | 10425317 |                                    |                           |                                  |                                    | 0.802 | -1.738 | 0.124503    | 0.353403   |
| 19108 | 10524876 | <a href="#">NM_001033311</a>       | <a href="#">231668</a>    | cDNA sequence BC023744           | <a href="#">BC023744</a>           | 0.802 | -2.255 | 0.0576657   | 0.220155   |
| 19109 | 10566683 | <a href="#">NM_146739</a>          | <a href="#">258734</a>    | olfactory receptor 502           | <a href="#">Olfr502</a>            | 0.802 | -3.124 | 0.0650228   | 0.237821   |
| 19110 | 10474169 |                                    |                           |                                  |                                    | 0.802 | -3.124 | 0.0650228   | 0.0950638  |
| 19111 | 10576403 | <a href="#">NM_001029876</a>       | <a href="#">382038</a>    | cDNA sequence AK122209           | <a href="#">AK122209</a>           | 0.802 | -2.469 | 0.0418961   | 0.178779   |
| 19112 | 10406245 |                                    |                           |                                  |                                    | 0.802 | -2.721 | 0.0288965   | 0.13975    |
| 19113 | 10466839 | <a href="#">XR_034316</a>          | <a href="#">637203</a>    | similar to 60S ribosomal prote   | <a href="#">LOC637203</a>          | 0.802 | -3.015 | 0.0188409   | 0.105433   |
| 19114 | 10384370 | <a href="#">ENSMUST00000101517</a> | <a href="#">100038572</a> | predicted gene, OTTMUSG000000000 | <a href="#">OTTMUSG00000005162</a> | 0.802 | -2.347 | 0.0502877   | 0.201609   |
| 19115 | 10466818 | <a href="#">NM_146097</a>          | <a href="#">226043</a>    | COBW domain containing 1         | <a href="#">Cbwd1</a>              | 0.802 | -4.454 | 0.00274931  | 0.0272406  |
| 19116 | 10413086 | <a href="#">NM_134079</a>          | <a href="#">11534</a>     | adenosine kinase                 | <a href="#">Adk</a>                | 0.802 | -3.568 | 0.00868421  | 0.0613817  |
| 19117 | 10607059 | <a href="#">NM_010572</a>          | <a href="#">16370</a>     | insulin receptor substrate 4     | <a href="#">Irs4</a>               | 0.802 | -2.016 | 0.0823929   | 0.274522   |
| 19118 | 10601915 | <a href="#">BC031748</a>           | <a href="#">245622</a>    | cDNA sequence BC031748           | <a href="#">BC031748</a>           | 0.802 | -2.493 | 0.0404573   | 0.175113   |
| 19119 | 10436983 | <a href="#">NM_027293</a>          | <a href="#">70028</a>     | dopey family member 2            | <a href="#">Dopey2</a>             | 0.802 | -3.17  | 0.0150964   | 0.0907637  |

|       |          |                                    |                           |                                |                                    |       |        |             |            |
|-------|----------|------------------------------------|---------------------------|--------------------------------|------------------------------------|-------|--------|-------------|------------|
| 19120 | 10506274 | <a href="#">NM_198412</a>          | <a href="#">72685</a>     | DnaJ (Hsp40) homolog, subfamil | <a href="#">Dnajc6</a>             | 0.802 | -3.349 | 0.0117337   | 0.0756162  |
| 19121 | 10533085 | <a href="#">NM_018858</a>          | <a href="#">23980</a>     | phosphatidylethanolamine bindi | <a href="#">Pebp1</a>              | 0.802 | -1.741 | 0.123886    | 0.352219   |
| 19122 | 10489870 | <a href="#">XM_983885</a>          | <a href="#">675636</a>    | similar to 60S ribosomal prote | <a href="#">LOC675636</a>          | 0.802 | -0.774 | 0.463422    | 0.717662   |
| 19123 | 10526502 | <a href="#">NM_026073</a>          | <a href="#">67286</a>     | RAB, member of RAS oncogene fa | <a href="#">Rab15</a>              | 0.802 | -3.403 | 0.0108924   | 0.0718818  |
| 19124 | 10552929 | <a href="#">U88401</a>             | <a href="#">50994</a>     | metastasis associated gene 2   | <a href="#">Mtag2</a>              | 0.802 | -2.103 | 0.072411    | 0.253444   |
| 19125 | 10395389 | <a href="#">NM_025312</a>          | <a href="#">66042</a>     | sclerostin domain containing 1 | <a href="#">Sostdc1</a>            | 0.802 | -1.263 | 0.246       | 0.519052   |
| 19126 | 10442211 | <a href="#">NM_013843</a>          | <a href="#">24132</a>     | zinc finger protein 53         | <a href="#">Zfp53</a>              | 0.802 | -3.349 | 0.0117434   | 0.0756561  |
| 19127 | 10434758 | <a href="#">NM_145933</a>          | <a href="#">20440</a>     | beta galactoside alpha 2,6 sia | <a href="#">St6gal1</a>            | 0.802 | -4.29  | 0.00337165  | 0.0310227  |
| 19128 | 10422026 | <a href="#">NM_029680</a>          | <a href="#">76627</a>     | RIKEN cDNA 1700110M21 gene     | <a href="#">1700110M21Rik</a>      | 0.801 | -1.838 | 0.107366    | 0.322922   |
| 19129 | 10492220 | <a href="#">NM_001040396</a>       | <a href="#">69227</a>     | RIKEN cDNA 2810407C02 gene     | <a href="#">2810407C02Rik</a>      | 0.801 | -5.486 | 0.00083172  | 0.0115242  |
| 19130 | 10519117 | <a href="#">NM_008860</a>          | <a href="#">18762</a>     | protein kinase C, zeta         | <a href="#">Prkcz</a>              | 0.801 | -2.176 | 0.0649313   | 0.237571   |
| 19131 | 10473783 | <a href="#">NM_009023</a>          | <a href="#">19400</a>     | receptor-associated protein of | <a href="#">Rapsn</a>              | 0.801 | -2.489 | 0.0407092   | 0.175879   |
| 19132 | 10408932 | <a href="#">XR_031090</a>          | <a href="#">667204</a>    | similar to Predicted gene, EG2 | <a href="#">LOC667204</a>          | 0.801 | -0.872 | 0.411496    | 0.675413   |
| 19133 | 10460097 | <a href="#">AK141732</a>           | <a href="#">433208</a>    | hypothetical LOC433208         | <a href="#">LOC433208</a>          | 0.801 | -1.685 | 0.134682    | 0.369832   |
| 19134 | 10468691 | <a href="#">NM_178688</a>          | <a href="#">226251</a>    | actin-binding LIM protein 1    | <a href="#">Ablim1</a>             | 0.801 | -3.808 | 0.00628327  | 0.0485221  |
| 19135 | 10373454 | <a href="#">NM_011119</a>          | <a href="#">18813</a>     | proliferation-associated 2G4   | <a href="#">Pa2g4</a>              | 0.801 | -3.621 | 0.00807629  | 0.0584012  |
| 19136 | 10456721 |                                    |                           |                                |                                    | 0.801 | -1.116 | 0.300182    | 0.576271   |
| 19137 | 10526232 | <a href="#">NM_024479</a>          | <a href="#">79565</a>     | Williams Beuren syndrome chrom | <a href="#">Wbscr27</a>            | 0.801 | -3.453 | 0.0101671   | 0.0687475  |
| 19138 | 10349429 |                                    |                           |                                |                                    | 0.801 | -2.974 | 0.0199958   | 0.109859   |
| 19139 | 10485698 | <a href="#">XR_034534</a>          | <a href="#">623145</a>    | similar to L-lactate dehydroge | <a href="#">LOC623145</a>          | 0.8   | -1.789 | 0.115563    | 0.337961   |
| 19140 | 10491518 |                                    |                           |                                |                                    | 0.8   | -2.493 | 0.0404267   | 0.175053   |
| 19141 | 10469568 | <a href="#">ENSMUST00000070378</a> | <a href="#">74169</a>     | RIKEN cDNA 1810010K12 gene     | <a href="#">1810010K12Rik</a>      | 0.8   | -4.673 | 0.00210562  | 0.0226111  |
| 19142 | 10588505 | <a href="#">NM_029631</a>          | <a href="#">76491</a>     | abhydrolase domain containing  | <a href="#">Abhd14b</a>            | 0.8   | -4.324 | 0.00322912  | 0.0301308  |
| 19143 | 10393866 | <a href="#">NM_153056</a>          | <a href="#">209011</a>    | sirtuin 7 (silent mating type  | <a href="#">Sirt7</a>              | 0.8   | -4.444 | 0.00278376  | 0.0274277  |
| 19144 | 10592023 | <a href="#">NM_001102455</a>       | <a href="#">11804</a>     | amyloid beta (A4) precursor-li | <a href="#">Aplp2</a>              | 0.8   | -3.697 | 0.00728864  | 0.0543027  |
| 19145 | 10596051 | <a href="#">NM_001101483</a>       | <a href="#">245020</a>    | transmembrane protein 22       | <a href="#">Tmem22</a>             | 0.8   | -3.168 | 0.0151387   | 0.0909615  |
| 19146 | 10386423 | <a href="#">NM_183139</a>          | <a href="#">194908</a>    | RIKEN cDNA 4933433K01 gene     | <a href="#">4933433K01Rik</a>      | 0.8   | -2.843 | 0.0241775   | 0.124534   |
| 19147 | 10404036 | <a href="#">NM_178196</a>          | <a href="#">319181</a>    | histone cluster 1, H2bg        | <a href="#">Hist1h2bg</a>          | 0.8   | -2.214 | 0.0613072   | 0.2285     |
| 19148 | 10560945 | <a href="#">NM_008168</a>          | <a href="#">14809</a>     | glutamate receptor, ionotropic | <a href="#">Grik5</a>              | 0.8   | -3.41  | 0.0107847   | 0.0715509  |
| 19149 | 10598839 | <a href="#">NM_133669</a>          | <a href="#">19889</a>     | retinitis pigmentosa 2 homolog | <a href="#">Rp2h</a>               | 0.8   | -3.734 | 0.00693466  | 0.0521617  |
| 19150 | 10459510 |                                    |                           |                                |                                    | 0.8   | -1.841 | 0.106904    | 0.322497   |
| 19151 | 10565170 | <a href="#">BC027500</a>           | <a href="#">67290</a>     | RIKEN cDNA 3110040N11 gene     | <a href="#">3110040N11Rik</a>      | 0.8   | -3.296 | 0.0126427   | 0.0796771  |
| 19152 | 10441956 | <a href="#">NM_024203</a>          | <a href="#">67544</a>     | RIKEN cDNA 4932442K08 gene     | <a href="#">4932442K08Rik</a>      | 0.8   | -5.763 | 0.000618549 | 0.00941584 |
| 19153 | 10438738 | <a href="#">NM_009744</a>          | <a href="#">12053</a>     | B-cell leukemia/lymphoma 6     | <a href="#">Bcl6</a>               | 0.8   | -2.097 | 0.0730087   | 0.254739   |
| 19154 | 10497912 | <a href="#">NM_198657</a>          | <a href="#">381438</a>    | predicted gene, EG381438       | <a href="#">EG381438</a>           | 0.8   | -2.626 | 0.033215    | 0.1537     |
| 19155 | 10408024 | <a href="#">BC089360</a>           | <a href="#">319207</a>    | piggyBac transposable element  | <a href="#">Pgbd1</a>              | 0.8   | -2.342 | 0.050656    | 0.202722   |
| 19156 | 10503116 | <a href="#">AK052165</a>           | <a href="#">100036540</a> | predicted gene, ENSMUSG0000005 | <a href="#">ENSMUSG00000054541</a> | 0.8   | -2.358 | 0.0494517   | 0.19981    |
| 19157 | 10442370 | <a href="#">NM_019910</a>          | <a href="#">13184</a>     | demilune cell and parotid prot | <a href="#">Dcpl1</a>              | 0.8   | -2.047 | 0.0787214   | 0.267044   |
| 19158 | 10349562 | <a href="#">NM_177604</a>          | <a href="#">212439</a>    | expressed sequence AA986860    | <a href="#">AA986860</a>           | 0.799 | -2.015 | 0.0825087   | 0.274778   |
| 19159 | 10399584 | <a href="#">AK144596</a>           | <a href="#">100038502</a> | predicted gene, ENSMUSG0000007 | <a href="#">ENSMUSG00000073180</a> | 0.799 | -2.104 | 0.0723256   | 0.253313   |
| 19160 | 10399588 | <a href="#">ENSMUST00000079237</a> | <a href="#">22651</a>     | zinc finger protein 125        | <a href="#">Zfp125</a>             | 0.799 | -2.355 | 0.0497008   | 0.200281   |
| 19161 | 10531919 | <a href="#">NM_053262</a>          | <a href="#">114664</a>    | hydroxysteroid (17-beta) dehyd | <a href="#">Hsd17b11</a>           | 0.799 | -2.313 | 0.0529194   | 0.208483   |
| 19162 | 10600755 | <a href="#">NM_007492</a>          | <a href="#">11878</a>     | aristaless related homeobox ge | <a href="#">Arx</a>                | 0.799 | -2.053 | 0.0779701   | 0.26556    |
| 19163 | 10515423 |                                    |                           |                                |                                    | 0.799 | -1.547 | 0.164624    | 0.414483   |
| 19164 | 10503220 | <a href="#">NM_001081417</a>       | <a href="#">320790</a>    | chromodomain helicase DNA bind | <a href="#">Chd7</a>               | 0.799 | -2.827 | 0.0247509   | 0.126592   |
| 19165 | 10575160 | <a href="#">NM_133957</a>          | <a href="#">54446</a>     | nuclear factor of activated T- | <a href="#">Nfat5</a>              | 0.799 | -1.978 | 0.0871833   | 0.284169   |
| 19166 | 10494428 | <a href="#">NM_001009935</a>       | <a href="#">56338</a>     | thioredoxin interacting protei | <a href="#">Txnip</a>              | 0.799 | -2.391 | 0.0470967   | 0.192875   |
| 19167 | 10456699 | <a href="#">NM_177470</a>          | <a href="#">52538</a>     | acetyl-Coenzyme A acyltransfer | <a href="#">Acaa2</a>              | 0.799 | -4.289 | 0.00337634  | 0.0310523  |

|       |          |                                    |                           |                                |                                   |       |        |            |           |
|-------|----------|------------------------------------|---------------------------|--------------------------------|-----------------------------------|-------|--------|------------|-----------|
| 19168 | 10488415 | <a href="#">NM_009976</a>          | <a href="#">13010</a>     | cystatin C                     | <a href="#">Cst3</a>              | 0.799 | -3.33  | 0.0120577  | 0.077029  |
| 19169 | 10578324 | <a href="#">NM_001005863</a>       | <a href="#">102103</a>    | mitochondrial tumor suppressor | <a href="#">Mtus1</a>             | 0.799 | -3.882 | 0.00569977 | 0.0453238 |
| 19170 | 10492078 | <a href="#">NM_025442</a>          | <a href="#">66248</a>     | asparagine-linked glycosylatio | <a href="#">Alg5</a>              | 0.799 | -4.91  | 0.00159157 | 0.0182002 |
| 19171 | 10388579 | <a href="#">NM_016810</a>          | <a href="#">53334</a>     | golgi SNAP receptor complex me | <a href="#">Gosr1</a>             | 0.799 | -4.18  | 0.00387184 | 0.0341512 |
| 19172 | 10451879 | <a href="#">NM_144546</a>          | <a href="#">104349</a>    | zinc finger protein 119        | <a href="#">Zfp119</a>            | 0.799 | -2.098 | 0.0729553  | 0.254633  |
| 19173 | 10494595 | <a href="#">NM_010928</a>          | <a href="#">18129</a>     | Notch gene homolog 2 (Drosophi | <a href="#">Notch2</a>            | 0.799 | -2.764 | 0.0271341  | 0.134173  |
| 19174 | 10572663 | <a href="#">NM_025396</a>          | <a href="#">66171</a>     | 6-phosphogluconolactonase      | <a href="#">Pgl5</a>              | 0.799 | -4.499 | 0.00260118 | 0.0261175 |
| 19175 | 10387514 |                                    |                           |                                |                                   | 0.798 | -2.192 | 0.0633447  | 0.23339   |
| 19176 | 10418297 | <a href="#">XR_032191</a>          | <a href="#">665370</a>    | similar to Small nuclear RNA a | <a href="#">LOC665370</a>         | 0.798 | -0.981 | 0.35819    | 0.6305    |
| 19177 | 10563387 | <a href="#">NM_001033792</a>       | <a href="#">545963</a>    | predicted gene, EG545963       | <a href="#">EG545963</a>          | 0.798 | -2.567 | 0.0362296  | 0.162503  |
| 19178 | 10447395 | <a href="#">NM_008628</a>          | <a href="#">17685</a>     | mutS homolog 2 (E. coli)       | <a href="#">Msh2</a>              | 0.798 | -3.122 | 0.0161654  | 0.0951294 |
| 19179 | 10607363 |                                    |                           |                                |                                   | 0.798 | -2.342 | 0.0506207  | 0.202691  |
| 19180 | 10586174 |                                    |                           |                                |                                   | 0.798 | -1.747 | 0.122873   | 0.350766  |
| 19181 | 10388476 | <a href="#">NM_029548</a>          | <a href="#">380714</a>    | rabphilin 3A-like (without C2  | <a href="#">Rph3a1</a>            | 0.798 | -3.759 | 0.00670759 | 0.0509613 |
| 19182 | 10586477 | <a href="#">NM_011149</a>          | <a href="#">19035</a>     | peptidylprolyl isomerase B     | <a href="#">Ppib</a>              | 0.798 | -5.083 | 0.00130248 | 0.0158638 |
| 19183 | 10412943 | <a href="#">NM_026341</a>          | <a href="#">67725</a>     | nudix (nucleoside diphosphate  | <a href="#">Nudt13</a>            | 0.798 | -3.554 | 0.00884616 | 0.0621917 |
| 19184 | 10392415 | <a href="#">NM_011268</a>          | <a href="#">19739</a>     | regulator of G-protein signali | <a href="#">Rgs9</a>              | 0.798 | -3.488 | 0.00968526 | 0.0665103 |
| 19185 | 10601854 | <a href="#">NM_011712</a>          | <a href="#">22381</a>     | WW domain binding protein 5    | <a href="#">Wbp5</a>              | 0.798 | -4.852 | 0.00170348 | 0.0190876 |
| 19186 | 10350188 | <a href="#">NM_025439</a>          | <a href="#">66241</a>     | transmembrane protein 9        | <a href="#">Tmem9</a>             | 0.798 | -4.373 | 0.00303963 | 0.0290298 |
| 19187 | 10533237 | <a href="#">NM_033541</a>          | <a href="#">114643</a>    | 2'-5' oligoadenylate synthetas | <a href="#">Oas1c</a>             | 0.798 | -2.02  | 0.081968   | 0.273497  |
| 19188 | 10429638 | <a href="#">XR_033200</a>          | <a href="#">672572</a>    | similar to glyceraldehyde-3-ph | <a href="#">LOC672572</a>         | 0.797 | -1.259 | 0.247108   | 0.520387  |
| 19189 | 10596381 |                                    |                           |                                |                                   | 0.797 | -1.823 | 0.109755   | 0.327457  |
| 19190 | 10579023 | <a href="#">NM_153054</a>          | <a href="#">110877</a>    | solute carrier family 18 (vesi | <a href="#">Slc18a1</a>           | 0.797 | -3.027 | 0.0185212  | 0.104097  |
| 19191 | 10499612 | <a href="#">NM_009565</a>          | <a href="#">22724</a>     | zinc finger and BTB domain con | <a href="#">Zbtb7b</a>            | 0.797 | -2.657 | 0.0317366  | 0.149088  |
| 19192 | 10503178 | <a href="#">NM_001081417</a>       | <a href="#">320790</a>    | chromodomain helicase DNA bind | <a href="#">Chd7</a>              | 0.797 | -2.279 | 0.0556     | 0.215288  |
| 19193 | 10512714 | <a href="#">ENSMUST00000061986</a> | <a href="#">230126</a>    | src homology 2 domain-containi | <a href="#">Shb</a>               | 0.797 | -3.362 | 0.011528   | 0.0748614 |
| 19194 | 10504491 | <a href="#">NM_177027</a>          | <a href="#">319885</a>    | zinc finger, CCHC domain conta | <a href="#">Zcche7</a>            | 0.797 | -4.019 | 0.00476208 | 0.0397667 |
| 19195 | 10356406 | <a href="#">NM_001111314</a>       | <a href="#">53972</a>     | neuronal guanine nucleotide ex | <a href="#">Ngef</a>              | 0.797 | -3.201 | 0.0144548  | 0.0880534 |
| 19196 | 10509790 | <a href="#">NM_175438</a>          | <a href="#">212647</a>    | aldehyde dehydrogenase 4 famil | <a href="#">Aldh4a1</a>           | 0.797 | -3.283 | 0.0128825  | 0.0809488 |
| 19197 | 10535310 |                                    |                           |                                |                                   | 0.797 | -2.999 | 0.0192895  | 0.107077  |
| 19198 | 10508249 | <a href="#">ENSMUST00000094712</a> | <a href="#">100039968</a> | predicted gene, OTTMUSG0000000 | <a href="#">OTTMUSG0000009332</a> | 0.796 | -3.987 | 0.00496333 | 0.0410898 |
| 19199 | 10382425 | <a href="#">NM_001110337</a>       | <a href="#">70355</a>     | G protein-coupled receptor, fa | <a href="#">Gprc5c</a>            | 0.796 | -4.871 | 0.00166523 | 0.0187985 |
| 19200 | 10388033 | <a href="#">NM_033562</a>          | <a href="#">116891</a>    | Der1-like domain family, membe | <a href="#">Derl2</a>             | 0.796 | -3.465 | 0.009996   | 0.0680694 |
| 19201 | 10517213 | <a href="#">NM_001081047</a>       | <a href="#">194231</a>    | connector enhancer of kinase s | <a href="#">Cnksr1</a>            | 0.796 | -4.894 | 0.00162073 | 0.018434  |
| 19202 | 10389858 | <a href="#">NM_008705</a>          | <a href="#">18103</a>     | non-metastatic cells 2, protei | <a href="#">Nme2</a>              | 0.796 | -2.811 | 0.0253115  | 0.128435  |
| 19203 | 10521950 | <a href="#">NM_001081103</a>       | <a href="#">116873</a>    | stromal interaction molecule 2 | <a href="#">Stim2</a>             | 0.796 | -3.701 | 0.00724594 | 0.0540417 |
| 19204 | 10448034 | <a href="#">NM_007865</a>          | <a href="#">13388</a>     | delta-like 1 (Drosophila)      | <a href="#">Dll1</a>              | 0.796 | -2.824 | 0.024838   | 0.126915  |
| 19205 | 10517036 | <a href="#">NM_199306</a>          | <a href="#">230796</a>    | WD and tetratricopeptide repea | <a href="#">Wdtd1</a>             | 0.796 | -3.472 | 0.00989909 | 0.0675836 |
| 19206 | 10487722 | <a href="#">NM_001081162</a>       | <a href="#">269356</a>    | solute carrier family 4, sodiu | <a href="#">Slc4a11</a>           | 0.795 | -2.046 | 0.078842   | 0.267367  |
| 19207 | 10468413 | <a href="#">BC107403</a>           | <a href="#">70806</a>     | DNA segment, Chr 19, ERATO Doi | <a href="#">D19Ertd652e</a>       | 0.795 | -2.394 | 0.0468644  | 0.192371  |
| 19208 | 10379401 | <a href="#">NM_028019</a>          | <a href="#">71956</a>     | ring finger protein 135        | <a href="#">Rnf135</a>            | 0.795 | -2.49  | 0.0406387  | 0.175719  |
| 19209 | 10493703 | <a href="#">NM_206924</a>          | <a href="#">23922</a>     | jumping translocation breakpoi | <a href="#">Jtb</a>               | 0.795 | -3.958 | 0.00515566 | 0.042187  |
| 19210 | 10515111 |                                    |                           |                                |                                   | 0.795 | -1.409 | 0.200395   | 0.462419  |
| 19211 | 10400143 | <a href="#">NM_144552</a>          | <a href="#">217517</a>    | syntaxin binding protein 6 (am | <a href="#">Stxbp6</a>            | 0.795 | -2.657 | 0.0317148  | 0.149088  |
| 19212 | 10591653 | <a href="#">NM_178577</a>          | <a href="#">235043</a>    | transmembrane protein 205      | <a href="#">Tmem205</a>           | 0.795 | -3.955 | 0.00517356 | 0.0422494 |
| 19213 | 10388517 | <a href="#">NM_177367</a>          | <a href="#">276919</a>    | gem (nuclear organelle) associ | <a href="#">Gemin4</a>            | 0.795 | -3.46  | 0.0100637  | 0.0683765 |
| 19214 | 10410099 | <a href="#">NM_172587</a>          | <a href="#">218294</a>    | CDC14 cell division cycle 14 h | <a href="#">Cdc14b</a>            | 0.795 | -2.132 | 0.0692724  | 0.246644  |
| 19215 | 10373702 | <a href="#">NR_003517</a>          | <a href="#">236604</a>    | phosphatidylserine decarboxyla | <a href="#">LOC236604</a>         | 0.795 | -3.314 | 0.0123341  | 0.0782223 |
| 19216 | 10551872 | <a href="#">NM_153577</a>          | <a href="#">233066</a>    | expressed sequence AI428936    | <a href="#">AI428936</a>          | 0.794 | -4.209 | 0.00373379 | 0.0332773 |
| 19217 | 10578504 | <a href="#">BC107256</a>           | <a href="#">69479</a>     | RIKEN cDNA 1700029J07 gene     | <a href="#">1700029J07Rik</a>     | 0.794 | -1.964 | 0.0890412  | 0.287785  |
| 19218 | 10396800 | <a href="#">ENSMUST00000039928</a> | <a href="#">211945</a>    | pleckstrin homology domain con | <a href="#">Plekhh1</a>           | 0.794 | -4.82  | 0.00176861 | 0.0196715 |
| 19219 | 10508412 | <a href="#">NM_027402</a>          | <a href="#">384061</a>    | fibronectin type III domain co | <a href="#">Fndc5</a>             | 0.794 | -2.871 | 0.0232135  | 0.121012  |

|       |          |                                    |                           |                                |                                    |       |        |             |            |
|-------|----------|------------------------------------|---------------------------|--------------------------------|------------------------------------|-------|--------|-------------|------------|
| 19220 | 10469951 | <a href="#">NM_176834</a>          | <a href="#">68846</a>     | ring finger protein 208        | <a href="#">Rnf208</a>             | 0.794 | -4.383 | 0.00300161  | 0.0287567  |
| 19221 | 10346878 | <a href="#">ENSMUST00000114132</a> | <a href="#">73884</a>     | zinc finger, DBF-type containi | <a href="#">Zdbf2</a>              | 0.794 | -3.002 | 0.0191847   | 0.106692   |
| 19222 | 10575596 |                                    |                           |                                |                                    | 0.794 | -2.079 | 0.0749866   | 0.258984   |
| 19223 | 10414182 | <a href="#">BC049632</a>           | <a href="#">69496</a>     | DPY30 domain containing 1      | <a href="#">Dydc1</a>              | 0.794 | -2.574 | 0.0358615   | 0.161427   |
| 19224 | 10564502 | <a href="#">ENSMUST00000032770</a> | <a href="#">78444</a>     | RIKEN cDNA C330024D12 gene     | <a href="#">C330024D12Rik</a>      | 0.794 | -4.098 | 0.00430232  | 0.0367697  |
| 19225 | 10502375 | <a href="#">NM_008642</a>          | <a href="#">17777</a>     | microsomal triglyceride transf | <a href="#">Mttf</a>               | 0.794 | -2.252 | 0.0579206   | 0.220742   |
| 19226 | 10442396 | <a href="#">NM_013855</a>          | <a href="#">27410</a>     | ATP-binding cassette, sub-fami | <a href="#">Abca3</a>              | 0.794 | -3.96  | 0.00514193  | 0.0421073  |
| 19227 | 10512606 | <a href="#">NM_026871</a>          | <a href="#">68917</a>     | histidine triad nucleotide bin | <a href="#">Hint2</a>              | 0.794 | -3.614 | 0.00814945  | 0.0587093  |
| 19228 | 10494388 | <a href="#">NM_178214</a>          | <a href="#">319190</a>    | histone cluster 2, H2be        | <a href="#">Hist2h2be</a>          | 0.794 | -3.612 | 0.00817198  | 0.0587915  |
| 19229 | 10418027 | <a href="#">NM_026965</a>          | <a href="#">69156</a>     | catechol-O-methyltransferase d | <a href="#">Comtd1</a>             | 0.793 | -3.797 | 0.00637317  | 0.0490168  |
| 19230 | 10383210 | <a href="#">ENSMUST00000093902</a> | <a href="#">672511</a>    | hypothetical LOC672511         | <a href="#">LOC672511</a>          | 0.793 | -3.223 | 0.0140069   | 0.0858692  |
| 19231 | 10542714 | <a href="#">NM_133688</a>          | <a href="#">67636</a>     | LYR motif containing 5         | <a href="#">Lym5</a>               | 0.793 | -5.371 | 0.000943686 | 0.0126089  |
| 19232 | 10450103 | <a href="#">NM_013543</a>          | <a href="#">14979</a>     | H2-K region expressed gene 6   | <a href="#">H2-Ke6</a>             | 0.793 | -4.416 | 0.00287842  | 0.0280477  |
| 19233 | 10420730 | <a href="#">NM_010191</a>          | <a href="#">14137</a>     | farnesyl diphosphate farnesyl  | <a href="#">Fdft1</a>              | 0.793 | -4.358 | 0.00309562  | 0.0293384  |
| 19234 | 10501235 | <a href="#">NM_026764</a>          | <a href="#">14865</a>     | glutathione S-transferase, mu  | <a href="#">Gstm4</a>              | 0.793 | -2.975 | 0.0199628   | 0.109777   |
| 19235 | 10498187 | <a href="#">BC058995</a>           | <a href="#">329641</a>    | RIKEN cDNA 6030405A18 gene     | <a href="#">6030405A18Rik</a>      | 0.793 | -2.68  | 0.0306774   | 0.145769   |
| 19236 | 10364038 | <a href="#">NM_133995</a>          | <a href="#">103149</a>    | ureidopropionase, beta         | <a href="#">Upb1</a>               | 0.793 | -3.028 | 0.0184821   | 0.104016   |
| 19237 | 10349945 | <a href="#">ENSMUST00000097572</a> | <a href="#">100038692</a> | predicted gene, ENSMUSG0000007 | <a href="#">ENSMUSG00000073560</a> | 0.793 | -2.976 | 0.0199254   | 0.109657   |
| 19238 | 10467425 | <a href="#">NM_178362</a>          | <a href="#">20411</a>     | sorbin and SH3 domain containi | <a href="#">Sorbs1</a>             | 0.793 | -2.498 | 0.0401274   | 0.174258   |
| 19239 | 10407276 |                                    |                           |                                |                                    | 0.793 | -2.319 | 0.0524079   | 0.207062   |
| 19240 | 10578493 | <a href="#">NM_126166</a>          | <a href="#">142980</a>    | toll-like receptor 3           | <a href="#">Tlr3</a>               | 0.793 | -4.274 | 0.00343708  | 0.0314073  |
| 19241 | 10522004 | <a href="#">BC004797</a>           | <a href="#">76261</a>     | RIKEN cDNA 0610040J01 gene     | <a href="#">0610040J01Rik</a>      | 0.793 | -3.07  | 0.017413    | 0.0997508  |
| 19242 | 10571978 | <a href="#">NM_145595</a>          | <a href="#">234309</a>    | carbonyl reductase 4           | <a href="#">Cbr4</a>               | 0.793 | -6.091 | 0.000441103 | 0.00740801 |
| 19243 | 10588696 | <a href="#">NM_019750</a>          | <a href="#">56441</a>     | N-acetyltransferase 6          | <a href="#">Nat6</a>               | 0.793 | -3.196 | 0.0145466   | 0.0884179  |
| 19244 | 10384811 | <a href="#">NM_025740</a>          | <a href="#">216618</a>    | coiled-coil domain containing  | <a href="#">Ccdc104</a>            | 0.793 | -4.654 | 0.00215307  | 0.0229481  |
| 19245 | 10478341 | <a href="#">NM_172150</a>          | <a href="#">245866</a>    | intraflagellar transport 52 ho | <a href="#">Ift52</a>              | 0.792 | -5.121 | 0.00124741  | 0.0154422  |
| 19246 | 10439766 | <a href="#">NM_021496</a>          | <a href="#">58998</a>     | poliovirus receptor-related 3  | <a href="#">Pvr13</a>              | 0.792 | -5.178 | 0.00117027  | 0.0147079  |
| 19247 | 10530841 | <a href="#">NM_008048</a>          | <a href="#">29817</a>     | insulin-like growth factor bin | <a href="#">Igfbp7</a>             | 0.792 | -3.512 | 0.00936969  | 0.0648149  |
| 19248 | 10494551 | <a href="#">NM_019800</a>          | <a href="#">66659</a>     | acid phosphatase 6, lysophosph | <a href="#">Acp6</a>               | 0.792 | -3.962 | 0.00513124  | 0.0420523  |
| 19249 | 10346164 | <a href="#">NM_138741</a>          | <a href="#">20324</a>     | serum deprivation response     | <a href="#">Sdpr</a>               | 0.792 | -2.228 | 0.0600723   | 0.22593    |
| 19250 | 10471878 |                                    |                           |                                |                                    | 0.792 | -3.069 | 0.0174444   | 0.0998765  |
| 19251 | 10505200 | <a href="#">NM_024255</a>          | <a href="#">72479</a>     | hydroxysteroid dehydrogenase 1 | <a href="#">Hsd12</a>              | 0.792 | -3.299 | 0.0125941   | 0.0795368  |
| 19252 | 10405892 | <a href="#">ENSMUST00000099412</a> | <a href="#">100038538</a> | predicted gene, ENSMUSG0000007 | <a href="#">ENSMUSG00000074826</a> | 0.792 | -2.435 | 0.0441061   | 0.185146   |
| 19253 | 10376446 | <a href="#">NM_031172</a>          | <a href="#">56631</a>     | tripartite motif-containing 17 | <a href="#">Trim17</a>             | 0.792 | -4.353 | 0.00311263  | 0.0294336  |
| 19254 | 10359118 | <a href="#">BC099972</a>           | <a href="#">214575</a>    | tudor domain containing 5      | <a href="#">Tdrd5</a>              | 0.792 | -2.944 | 0.0208689   | 0.113171   |
| 19255 | 10463347 | <a href="#">NM_024450</a>          | <a href="#">30049</a>     | stearoyl-coenzyme A desaturase | <a href="#">Scd3</a>               | 0.792 | -4.179 | 0.00387667  | 0.0341677  |
| 19256 | 10564567 |                                    |                           |                                |                                    | 0.792 | -1.651 | 0.141399    | 0.380665   |
| 19257 | 10361660 | <a href="#">NM_010690</a>          | <a href="#">16798</a>     | large tumor suppressor         | <a href="#">Lats1</a>              | 0.792 | -4.33  | 0.00320455  | 0.0299943  |
| 19258 | 10528702 | <a href="#">NM_145401</a>          | <a href="#">108099</a>    | protein kinase, AMP-activated, | <a href="#">Prkg2</a>              | 0.792 | -2.4   | 0.046459    | 0.191627   |
| 19259 | 10422052 | <a href="#">NM_001033132</a>       | <a href="#">66200</a>     | COMM domain containing 6       | <a href="#">Comm6</a>              | 0.792 | -5.755 | 0.000623691 | 0.00948728 |
| 19260 | 10392936 | <a href="#">NM_015807</a>          | <a href="#">50773</a>     | 5',3'-nucleotidase, cytosolic  | <a href="#">Nt5c</a>               | 0.792 | -3.855 | 0.00590756  | 0.046516   |
| 19261 | 10476588 | <a href="#">NM_001013802</a>       | <a href="#">72899</a>     | MACRO domain containing 2      | <a href="#">Macro2</a>             | 0.792 | -1.475 | 0.182447    | 0.438923   |
| 19262 | 10396440 | <a href="#">XM_204772</a>          | <a href="#">277089</a>    | predicted gene, EG277089       | <a href="#">EG277089</a>           | 0.792 | -2.372 | 0.0484559   | 0.196802   |
| 19263 | 10368083 | <a href="#">NM_144820</a>          | <a href="#">215814</a>    | coiled-coil domain containing  | <a href="#">Ccdc28a</a>            | 0.791 | -3.644 | 0.00782829  | 0.0571354  |
| 19264 | 10412562 | <a href="#">NM_134080</a>          | <a href="#">286940</a>    | filamin, beta                  | <a href="#">Flnb</a>               | 0.791 | -3.352 | 0.0116984   | 0.0755041  |
| 19265 | 10532301 |                                    |                           |                                |                                    | 0.791 | -1.112 | 0.301693    | 0.577901   |
| 19266 | 10563480 | <a href="#">NM_010602</a>          | <a href="#">16514</a>     | potassium inwardly rectifying  | <a href="#">Kcnj11</a>             | 0.791 | -3.498 | 0.00955223  | 0.0657534  |
| 19267 | 10501282 | <a href="#">NM_001081320</a>       | <a href="#">72023</a>     | cytochrome b-561 domain contai | <a href="#">Cyb561d1</a>           | 0.791 | -3.31  | 0.0123963   | 0.0785459  |
| 19268 | 10363173 | <a href="#">NM_010288</a>          | <a href="#">14609</a>     | gap junction protein, alpha 1  | <a href="#">Gjal</a>               | 0.791 | -3.746 | 0.0068208   | 0.0514884  |
| 19269 | 10420672 | <a href="#">NM_173419</a>          | <a href="#">239133</a>    | deleted in lymphocytic leukemi | <a href="#">Dleu7</a>              | 0.791 | -2.597 | 0.0346965   | 0.158108   |
| 19270 | 10592629 | <a href="#">NM_175481</a>          | <a href="#">110637</a>    | glutamate receptor, ionotropic | <a href="#">Grik4</a>              | 0.791 | -3.143 | 0.0156882   | 0.0930667  |
| 19271 | 10531304 | <a href="#">NM_016912</a>          | <a href="#">53886</a>     | cyclin-dependent kinase-like 2 | <a href="#">Cdkl2</a>              | 0.791 | -2.84  | 0.0242778   | 0.124965   |
| 19272 | 10440840 | <a href="#">BC019533</a>           | <a href="#">68001</a>     | RIKEN cDNA 1110004E09 gene     | <a href="#">1110004E09Rik</a>      | 0.791 | -3.953 | 0.00519336  | 0.042348   |
| 19273 | 10388492 | <a href="#">NM_026664</a>          | <a href="#">68299</a>     | vacuolar protein sorting 53 (y | <a href="#">Vps53</a>              | 0.791 | -4.997 | 0.00143838  | 0.0168681  |

|       |          |                                    |                           |                                |                                    |       |        |             |           |
|-------|----------|------------------------------------|---------------------------|--------------------------------|------------------------------------|-------|--------|-------------|-----------|
| 19274 | 10510594 | <a href="#">NM_011910</a>          | <a href="#">24111</a>     | urotensin 2                    | <a href="#">Uts2</a>               | 0.791 | -1.367 | 0.212622    | 0.478213  |
| 19275 | 10503593 | <a href="#">NM_175234</a>          | <a href="#">76132</a>     | RIKEN cDNA 6230409E13 gene     | <a href="#">6230409E13Rik</a>      | 0.791 | -4.322 | 0.00323555  | 0.0301509 |
| 19276 | 10567999 |                                    |                           |                                |                                    | 0.791 | -3.026 | 0.0185431   | 0.104192  |
| 19277 | 10365286 | <a href="#">NM_025499</a>          | <a href="#">66341</a>     | EP300 interacting inhibitor of | <a href="#">Eid3</a>               | 0.791 | -3.083 | 0.0171034   | 0.0987261 |
| 19278 | 10561911 | <a href="#">NM_175478</a>          | <a href="#">233067</a>    | leucine rich repeat and fibron | <a href="#">Lrfn3</a>              | 0.79  | -2.517 | 0.0390427   | 0.171199  |
| 19279 | 10593884 | <a href="#">ENSMUST00000098697</a> | <a href="#">100038566</a> | predicted gene, ENSMUSG0000007 | <a href="#">ENSMUSG00000074284</a> | 0.79  | -3.332 | 0.012023    | 0.0768949 |
| 19280 | 10607806 | <a href="#">NM_177429</a>          | <a href="#">237222</a>    | oral-facial-digital syndrome 1 | <a href="#">Ofd1</a>               | 0.79  | -3.271 | 0.0131006   | 0.0819766 |
| 19281 | 10447486 |                                    |                           |                                |                                    | 0.79  | -2.318 | 0.052457    | 0.207138  |
| 19282 | 10558903 | <a href="#">NM_011528</a>          | <a href="#">21351</a>     | transaldolase 1                | <a href="#">Taldo1</a>             | 0.79  | -4.096 | 0.00431443  | 0.0368285 |
| 19283 | 10529953 | <a href="#">AK036806</a>           | <a href="#">625026</a>    | hypothetical LOC625026         | <a href="#">LOC625026</a>          | 0.79  | -2.02  | 0.0819096   | 0.273441  |
| 19284 | 10591556 | <a href="#">NM_026282</a>          | <a href="#">67629</a>     | SPC24, NDC80 kinetochore compl | <a href="#">Spc24</a>              | 0.79  | -4.105 | 0.00426455  | 0.0365503 |
| 19285 | 10462683 | <a href="#">NM_029508</a>          | <a href="#">76073</a>     | polycomb group ring finger 5   | <a href="#">Pcgf5</a>              | 0.79  | -3.206 | 0.0143566   | 0.0875561 |
| 19286 | 10575777 | <a href="#">ENSMUST00000095172</a> | <a href="#">74440</a>     | RIKEN cDNA 4933407C03 gene     | <a href="#">4933407C03Rik</a>      | 0.79  | -4.876 | 0.00165515  | 0.0187448 |
| 19287 | 10582069 | <a href="#">BC038819</a>           | <a href="#">74032</a>     | RIKEN cDNA 4632417N05 gene     | <a href="#">4632417N05Rik</a>      | 0.79  | -3.1   | 0.0166797   | 0.0971556 |
| 19288 | 10483819 | <a href="#">NM_028235</a>          | <a href="#">72421</a>     | tetratricopeptide repeat domai | <a href="#">Ttc30b</a>             | 0.79  | -0.941 | 0.377169    | 0.647258  |
| 19289 | 10411142 | <a href="#">NM_016668</a>          | <a href="#">12116</a>     | betaine-homocysteine methyltra | <a href="#">Bhmt</a>               | 0.79  | -2.602 | 0.0343984   | 0.157065  |
| 19290 | 10454731 |                                    |                           |                                |                                    | 0.79  | -1.253 | 0.249362    | 0.523394  |
| 19291 | 10434802 | <a href="#">BC005613</a>           | <a href="#">210126</a>    | LIM domain containing preferre | <a href="#">Lpp</a>                | 0.79  | -2.507 | 0.0395961   | 0.172836  |
| 19292 | 10503161 | <a href="#">NM_001081417</a>       | <a href="#">320790</a>    | chromodomain helicase DNA bind | <a href="#">Chd7</a>               | 0.79  | -5.197 | 0.0011451   | 0.0144463 |
| 19293 | 10538413 | <a href="#">NM_199143</a>          | <a href="#">387524</a>    | zinc and ring finger 2         | <a href="#">Znrf2</a>              | 0.79  | -3.613 | 0.00815908  | 0.0587204 |
| 19294 | 10563099 | <a href="#">NR_000004</a>          | <a href="#">27212</a>     | small nucleolar RNA, C/D box 3 | <a href="#">Snord35b</a>           | 0.79  | -1.506 | 0.174433    | 0.427379  |
| 19295 | 10535331 | <a href="#">NM_175217</a>          | <a href="#">75104</a>     | monocyte to macrophage differe | <a href="#">Mmd2</a>               | 0.789 | -3.027 | 0.0185127   | 0.104077  |
| 19296 | 10587446 | <a href="#">NM_001039546</a>       | <a href="#">17920</a>     | myosin VI                      | <a href="#">Myo6</a>               | 0.789 | -2.447 | 0.0432804   | 0.182768  |
| 19297 | 10587829 | <a href="#">NM_011961</a>          | <a href="#">26432</a>     | procollagen lysine, 2-oxogluta | <a href="#">Plod2</a>              | 0.789 | -3.101 | 0.0166521   | 0.0970498 |
| 19298 | 10454077 | <a href="#">ENSMUST00000067347</a> | <a href="#">72504</a>     | TAF4B RNA polymerase II, TATA  | <a href="#">Taf4b</a>              | 0.789 | -3.507 | 0.00942867  | 0.0651077 |
| 19299 | 10525041 |                                    |                           |                                |                                    | 0.789 | -2.15  | 0.0675021   | 0.242726  |
| 19300 | 10412066 | <a href="#">NM_023852</a>          | <a href="#">67295</a>     | RAB3C, member RAS oncogene fam | <a href="#">Rab3c</a>              | 0.789 | -3.593 | 0.00838522  | 0.0598168 |
| 19301 | 10361640 | <a href="#">XM_001472599</a>       | <a href="#">100039303</a> | ribosomal protein L35a pseudog | <a href="#">LOC100039303</a>       | 0.789 | -2.576 | 0.0357461   | 0.161141  |
| 19302 | 10426244 | <a href="#">NM_021921</a>          | <a href="#">60597</a>     | mitogen-activated protein kina | <a href="#">Mapk8ip2</a>           | 0.789 | -2.375 | 0.0481901   | 0.196062  |
| 19303 | 10500042 | <a href="#">NM_030074</a>          | <a href="#">78266</a>     | zinc finger protein 687        | <a href="#">Zfp687</a>             | 0.789 | -4.24  | 0.00358936  | 0.0324747 |
| 19304 | 10394173 | <a href="#">NM_172421</a>          | <a href="#">75302</a>     | additional sex combs like 2 (D | <a href="#">Asxl2</a>              | 0.789 | -4.207 | 0.00374407  | 0.0333325 |
| 19305 | 10556381 | <a href="#">NM_177282</a>          | <a href="#">320878</a>    | microtubule associated monoxyg | <a href="#">Mical2</a>             | 0.789 | -3.156 | 0.0154096   | 0.0921438 |
| 19306 | 10401343 | <a href="#">NM_177395</a>          | <a href="#">338372</a>    | mitogen-activated protein kina | <a href="#">Map3k9</a>             | 0.788 | -5.379 | 0.000934718 | 0.0125346 |
| 19307 | 10607639 | <a href="#">NM_001001496</a>       | <a href="#">414089</a>    | gap junction protein, alpha 6  | <a href="#">Gja6</a>               | 0.788 | -5.223 | 0.0011118   | 0.0141204 |
| 19308 | 10368782 | <a href="#">NM_133999</a>          | <a href="#">103199</a>    | FIG4 homolog (S. cerevisiae)   | <a href="#">Fig4</a>               | 0.788 | -2.719 | 0.0289492   | 0.13996   |
| 19309 | 10568099 | <a href="#">NM_026827</a>          | <a href="#">68742</a>     | RIKEN cDNA 1110032O16 gene     | <a href="#">1110032O16Rik</a>      | 0.788 | -4.822 | 0.0017642   | 0.0196431 |
| 19310 | 10511382 | <a href="#">NM_010945</a>          | <a href="#">18201</a>     | neutral sphingomyelinase (N-SM | <a href="#">Nsmaf</a>              | 0.788 | -2.999 | 0.0192732   | 0.107015  |
| 19311 | 10434418 | <a href="#">BC052055</a>           | <a href="#">328643</a>    | cDNA sequence BC052055         | <a href="#">BC052055</a>           | 0.788 | -2.638 | 0.0326302   | 0.151834  |
| 19312 | 10492456 | <a href="#">NM_025822</a>          | <a href="#">66880</a>     | arginine/serine-rich coiled-co | <a href="#">Rsrl1</a>              | 0.788 | -4.059 | 0.00452072  | 0.0382191 |
| 19313 | 10579550 | <a href="#">BC058348</a>           | <a href="#">382018</a>    | unc-13 homolog A (C. elegans)  | <a href="#">Unc13a</a>             | 0.788 | -1.972 | 0.0879537   | 0.285667  |
| 19314 | 10474241 |                                    |                           |                                |                                    | 0.788 | -2.163 | 0.0661335   | 0.239933  |
| 19315 | 10497613 | <a href="#">ENSMUST00000091270</a> | <a href="#">545510</a>    | predicted gene, EG545510       | <a href="#">EG545510</a>           | 0.788 | -2.265 | 0.0568446   | 0.218146  |
| 19316 | 10385234 |                                    |                           |                                |                                    | 0.788 | -2.918 | 0.0216749   | 0.115643  |
| 19317 | 10573583 | <a href="#">NM_010764</a>          | <a href="#">17159</a>     | mannosidase 2, alpha B1        | <a href="#">Man2b1</a>             | 0.788 | -3.791 | 0.00642741  | 0.0492752 |
| 19318 | 10512930 | <a href="#">NM_001004025</a>       | <a href="#">19059</a>     | protein phosphatase 3, regulat | <a href="#">Ppp3r2</a>             | 0.788 | -1.755 | 0.121479    | 0.347955  |
| 19319 | 10428857 | <a href="#">NM_144800</a>          | <a href="#">211401</a>    | metastasis suppressor 1        | <a href="#">Mtss1</a>              | 0.787 | -4.521 | 0.00253105  | 0.0256417 |
| 19320 | 10533858 | <a href="#">NM_145371</a>          | <a href="#">209354</a>    | eukaryotic translation initiat | <a href="#">Eif2b1</a>             | 0.787 | -2.736 | 0.028274    | 0.137931  |
| 19321 | 10593834 | <a href="#">NM_183111</a>          | <a href="#">75258</a>     | RIKEN cDNA 4930563M21 gene     | <a href="#">4930563M21Rik</a>      | 0.787 | -3.515 | 0.00932601  | 0.064631  |
| 19322 | 10411147 | <a href="#">NM_022884</a>          | <a href="#">64918</a>     | betaine-homocysteine methyltra | <a href="#">Bhmt2</a>              | 0.787 | -3.188 | 0.0147206   | 0.0890307 |
| 19323 | 10509542 | <a href="#">NM_007838</a>          | <a href="#">13200</a>     | dolichyl-di-phosphooligosaccha | <a href="#">Ddost</a>              | 0.787 | -4.868 | 0.00167133  | 0.0188071 |

|       |          |                                    |                           |                                |                                    |       |        |            |           |
|-------|----------|------------------------------------|---------------------------|--------------------------------|------------------------------------|-------|--------|------------|-----------|
| 19324 | 10383785 | <a href="#">BC048445</a>           | <a href="#">67430</a>     | RIKEN cDNA 4921536K21 gene     | <a href="#">4921536K21Rik</a>      | 0.787 | -2.889 | 0.022588   | 0.118836  |
| 19325 | 10565081 | <a href="#">NM_011590</a>          | <a href="#">21854</a>     | translocase of inner mitochond | <a href="#">Timm17a</a>            | 0.787 | -3.538 | 0.00903906 | 0.0631599 |
| 19326 | 10458278 | <a href="#">BC064044</a>           | <a href="#">69816</a>     | RIKEN cDNA 2010001M09 gene     | <a href="#">2010001M09Rik</a>      | 0.787 | -2.218 | 0.0609696  | 0.227884  |
| 19327 | 10592106 | <a href="#">NM_054096</a>          | <a href="#">117149</a>    | toll-interleukin 1 receptor (T | <a href="#">Tirap</a>              | 0.787 | -3.627 | 0.00800568 | 0.0580494 |
| 19328 | 10345101 | <a href="#">NM_007740</a>          | <a href="#">12839</a>     | collagen, type IX, alpha 1     | <a href="#">Col9a1</a>             | 0.787 | -2.442 | 0.0436392  | 0.18388   |
| 19329 | 10501690 | <a href="#">NM_144902</a>          | <a href="#">229782</a>    | solute carrier family 35 (UDP- | <a href="#">Slc35a3</a>            | 0.787 | -2.497 | 0.0401872  | 0.174409  |
| 19330 | 10384956 | <a href="#">NM_026527</a>          | <a href="#">68044</a>     | ChaC, cation transport regulat | <a href="#">Chac2</a>              | 0.787 | -1.667 | 0.138227   | 0.376165  |
| 19331 | 10478907 | <a href="#">NM_021409</a>          | <a href="#">58220</a>     | par-6 (partitioning defective  | <a href="#">Pard6b</a>             | 0.787 | -4.499 | 0.00260138 | 0.0261175 |
| 19332 | 10454061 | <a href="#">XM_001474128</a>       | <a href="#">100040129</a> | similar to put. HMG-17 protein | <a href="#">LOC100040129</a>       | 0.787 | -2.234 | 0.0594969  | 0.224759  |
| 19333 | 10384652 | <a href="#">XR_034248</a>          | <a href="#">100042846</a> | similar to initiation factor 2 | <a href="#">LOC100042846</a>       | 0.787 | -2.522 | 0.0387215  | 0.170143  |
| 19334 | 10442321 | <a href="#">NM_181821</a>          | <a href="#">353502</a>    | host cell factor C1 regulator  | <a href="#">Hcfc1r1</a>            | 0.786 | -2.811 | 0.025321   | 0.128452  |
| 19335 | 10558548 | <a href="#">NM_177261</a>          | <a href="#">76484</a>     | kinase non-catalytic C-lobe do | <a href="#">Kndc1</a>              | 0.786 | -1.602 | 0.151954   | 0.395759  |
| 19336 | 10559673 | <a href="#">NM_029384</a>          | <a href="#">664968</a>    | RIKEN cDNA 2210411K11 gene     | <a href="#">2210411K11Rik</a>      | 0.786 | -2.547 | 0.037351   | 0.166263  |
| 19337 | 10555946 | <a href="#">NM_011421</a>          | <a href="#">20597</a>     | sphingomyelin phosphodiesteras | <a href="#">Smpd1</a>              | 0.786 | -3.588 | 0.00844931 | 0.0602131 |
| 19338 | 10544252 | <a href="#">NM_175528</a>          | <a href="#">243780</a>    | RIKEN cDNA E330009J07 gene     | <a href="#">E330009J07Rik</a>      | 0.786 | -3.13  | 0.0159879  | 0.0944005 |
| 19339 | 10400124 | <a href="#">XR_034872</a>          | <a href="#">638487</a>    | similar to protein phosphatase | <a href="#">LOC638487</a>          | 0.786 | -2.238 | 0.0591217  | 0.223906  |
| 19340 | 10562856 | <a href="#">NM_028021</a>          | <a href="#">71960</a>     | myosin, heavy polypeptide 14   | <a href="#">Myh14</a>              | 0.786 | -3.194 | 0.014586   | 0.0885208 |
| 19341 | 10516789 | <a href="#">NM_001083119</a>       | <a href="#">19273</a>     | protein tyrosine phosphatase,  | <a href="#">Ptpu</a>               | 0.786 | -3.745 | 0.00683642 | 0.0515695 |
| 19342 | 10602176 | <a href="#">XM_001472450</a>       | <a href="#">633736</a>    | predicted gene, EG633736       | <a href="#">EG633736</a>           | 0.786 | -4.463 | 0.00271903 | 0.0270061 |
| 19343 | 10532157 | <a href="#">NM_028876</a>          | <a href="#">73130</a>     | transmembrane emp24 protein tr | <a href="#">Tmed5</a>              | 0.786 | -2.896 | 0.0223668  | 0.117989  |
| 19344 | 10577114 | <a href="#">NM_025768</a>          | <a href="#">66790</a>     | GH regulated TBC protein 1     | <a href="#">Grtp1</a>              | 0.786 | -4.136 | 0.0040985  | 0.0355595 |
| 19345 | 10475981 | <a href="#">NM_025395</a>          | <a href="#">66170</a>     | coiled-coil-helix-coiled-coil- | <a href="#">Chchd5</a>             | 0.786 | -4.316 | 0.00326121 | 0.0303099 |
| 19346 | 10569823 | <a href="#">BC089480</a>           | <a href="#">546049</a>    | RIKEN cDNA C330021F23 gene     | <a href="#">C330021F23Rik</a>      | 0.786 | -2.998 | 0.0192951  | 0.10708   |
| 19347 | 10361007 | <a href="#">NM_026796</a>          | <a href="#">226830</a>    | SET and MYND domain containing | <a href="#">Smyd2</a>              | 0.785 | -5.2   | 0.00114156 | 0.0144102 |
| 19348 | 10486710 | <a href="#">ENSMUST00000110674</a> | <a href="#">329504</a>    | leucine carboxyl methyltransfe | <a href="#">Lcmt2</a>              | 0.785 | -3.128 | 0.0160273  | 0.0945805 |
| 19349 | 10376312 | <a href="#">BC063078</a>           | <a href="#">73158</a>     | La ribonucleoprotein domain fa | <a href="#">Larp1</a>              | 0.785 | -2.522 | 0.0387191  | 0.170143  |
| 19350 | 10409265 | <a href="#">NM_016709</a>          | <a href="#">11992</a>     | AU RNA binding protein/enoyl-c | <a href="#">Auh</a>                | 0.785 | -3.258 | 0.0133347  | 0.0830238 |
| 19351 | 10370754 | <a href="#">NM_015761</a>          | <a href="#">216164</a>    | downstream of Stk11            | <a href="#">Dos</a>                | 0.785 | -4.143 | 0.0040576  | 0.0353643 |
| 19352 | 10417708 | <a href="#">NM_027695</a>          | <a href="#">71147</a>     | 3-oxoacyl-ACP synthase, mitoch | <a href="#">Oxsm</a>               | 0.785 | -3.75  | 0.0067898  | 0.051346  |
| 19353 | 10483624 | <a href="#">NR_002854</a>          | <a href="#">111970</a>    | distal-less homeobox 1, antise | <a href="#">Dlx1as</a>             | 0.785 | -1.993 | 0.0852481  | 0.280281  |
| 19354 | 10592856 | <a href="#">NM_201372</a>          | <a href="#">382073</a>    | coiled-coil domain containing  | <a href="#">Ccdc84</a>             | 0.785 | -2.214 | 0.0613516  | 0.228625  |
| 19355 | 10405725 |                                    |                           |                                |                                    | 0.785 | -2.456 | 0.0427398  | 0.181209  |
| 19356 | 10351304 | <a href="#">NM_027430</a>          | <a href="#">70456</a>     | brain protein 44               | <a href="#">Brp44</a>              | 0.784 | -3.889 | 0.00564143 | 0.0450633 |
| 19357 | 10412376 | <a href="#">AK012975</a>           | <a href="#">100036525</a> | predicted gene, ENSMUSG0000004 | <a href="#">ENSMUSG00000043151</a> | 0.784 | -2.688 | 0.0303074  | 0.144742  |
| 19358 | 10518761 | <a href="#">ENSMUST00000116088</a> | <a href="#">384091</a>    | similar to Snrpf protein       | <a href="#">LOC384091</a>          | 0.784 | -2.008 | 0.0833723  | 0.276517  |
| 19359 | 10488697 | <a href="#">NM_018807</a>          | <a href="#">54711</a>     | pleiomorphic adenoma gene-like | <a href="#">Plagl2</a>             | 0.784 | -4.813 | 0.00178219 | 0.0198017 |
| 19360 | 10470959 | <a href="#">NM_172267</a>          | <a href="#">227696</a>    | phytanoyl-CoA dioxygenase doma | <a href="#">Phyhd1</a>             | 0.784 | -3.626 | 0.00801938 | 0.0581289 |
| 19361 | 10565102 | <a href="#">NM_021492</a>          | <a href="#">11775</a>     | adaptor-related protein comple | <a href="#">Ap3b2</a>              | 0.784 | -2.305 | 0.0535304  | 0.209868  |
| 19362 | 10521555 | <a href="#">NM_025281</a>          | <a href="#">17089</a>     | Ly1 antibody reactive clone    | <a href="#">Lyar</a>               | 0.784 | -3.694 | 0.00731872 | 0.0544884 |
| 19363 | 10506968 | <a href="#">BC023883</a>           | <a href="#">230603</a>    | RIKEN cDNA 4922503N01 gene     | <a href="#">4922503N01Rik</a>      | 0.784 | -3.916 | 0.00545003 | 0.0439662 |
| 19364 | 10436594 |                                    |                           |                                |                                    | 0.784 | -1.558 | 0.161867   | 0.410176  |
| 19365 | 10498323 | <a href="#">NM_001081262</a>       | <a href="#">545527</a>    | RIKEN cDNA 4932431H17 gene     | <a href="#">4932431H17Rik</a>      | 0.784 | -4.273 | 0.00344386 | 0.0314408 |
| 19366 | 10535577 | <a href="#">NM_177735</a>          | <a href="#">243339</a>    | transmembrane protein 130      | <a href="#">Tmem130</a>            | 0.784 | -2.307 | 0.053384   | 0.20961   |
| 19367 | 10502359 | <a href="#">NM_011932</a>          | <a href="#">26377</a>     | dual adaptor for phosphotyrosi | <a href="#">Dapp1</a>              | 0.784 | -3.046 | 0.0180167  | 0.102026  |
| 19368 | 10356475 | <a href="#">NM_177305</a>          | <a href="#">320982</a>    | ADP-ribosylation factor-like 4 | <a href="#">Arl4c</a>              | 0.784 | -3.19  | 0.0146687  | 0.0887935 |
| 19369 | 10509947 | <a href="#">NM_172520</a>          | <a href="#">213649</a>    | Rho guanine nucleotide exchang | <a href="#">Arhgef19</a>           | 0.784 | -4.592 | 0.00232053 | 0.0241314 |
| 19370 | 10541131 | <a href="#">NM_001033379</a>       | <a href="#">319618</a>    | DCP1 decapping enzyme homolog  | <a href="#">Dep1b</a>              | 0.784 | -2.916 | 0.0217254  | 0.115825  |

|       |          |                                    |                        |                                |                                    |       |        |             |            |
|-------|----------|------------------------------------|------------------------|--------------------------------|------------------------------------|-------|--------|-------------|------------|
| 19371 | 10396306 | <a href="#">NM_024205</a>          | <a href="#">104771</a> | RIKEN cDNA 120003C05 gene      | <a href="#">120003C05Rik</a>       | 0.783 | -3.902 | 0.00554646  | 0.0445509  |
| 19372 | 10583316 | <a href="#">BC056964</a>           | <a href="#">75316</a>  | Josephin domain containing 3   | <a href="#">Josd3</a>              | 0.783 | -2.881 | 0.0228705   | 0.120053   |
| 19373 | 10425335 | <a href="#">NM_207708</a>          | <a href="#">20972</a>  | synaptogyrin 1                 | <a href="#">Syngr1</a>             | 0.783 | -3.073 | 0.0173304   | 0.0994394  |
| 19374 | 10463155 | <a href="#">AK145489</a>           | <a href="#">381224</a> | gene model 340, (NCBI)         | <a href="#">Gm340</a>              | 0.783 | -2.575 | 0.035838    | 0.161363   |
| 19375 | 10395142 | <a href="#">NM_013709</a>          | <a href="#">24057</a>  | Sh3 domain YSC-like 1          | <a href="#">Sh3y11</a>             | 0.783 | -2.839 | 0.024296    | 0.124965   |
| 19376 | 10451004 | <a href="#">NM_009847</a>          | <a href="#">12488</a>  | CD2-associated protein         | <a href="#">Cd2ap</a>              | 0.783 | -4.727 | 0.00197387  | 0.0213809  |
| 19377 | 10571344 | <a href="#">NM_172911</a>          | <a href="#">244418</a> | DNA segment, Chr 8, ERATO Doi  | <a href="#">D8Ert82e</a>           | 0.783 | -5.884 | 0.00054487  | 0.00859115 |
| 19378 | 10406581 | <a href="#">NM_010049</a>          | <a href="#">13361</a>  | dihydrofolate reductase        | <a href="#">Dhfr</a>               | 0.783 | -3.544 | 0.00896785  | 0.0628492  |
| 19379 | 10508392 | <a href="#">ENSMUST00000030584</a> | <a href="#">75234</a>  | ring finger protein 19B        | <a href="#">Rnf19b</a>             | 0.783 | -3.542 | 0.00899183  | 0.0629339  |
| 19380 | 10360205 | <a href="#">NM_021607</a>          | <a href="#">59287</a>  | nicastatin                     | <a href="#">Ncstn</a>              | 0.783 | -4.439 | 0.00279979  | 0.0275466  |
| 19381 | 10346722 | <a href="#">NM_173444</a>          | <a href="#">269198</a> | neurobeachin like 1            | <a href="#">Nbeal1</a>             | 0.783 | -2.453 | 0.0429073   | 0.181802   |
| 19382 | 10496854 | <a href="#">ENSMUST00000037942</a> | <a href="#">70892</a>  | tubulin tyrosine ligase-like f | <a href="#">Ttl7</a>               | 0.782 | -3.744 | 0.00684365  | 0.0516056  |
| 19383 | 10586248 | <a href="#">XM_001476259</a>       | <a href="#">102442</a> | DENN/MADD domain containing 4A | <a href="#">Dennd4a</a>            | 0.782 | -2.432 | 0.04427     | 0.185686   |
| 19384 | 10547521 | <a href="#">NM_007510</a>          | <a href="#">11973</a>  | VATPase, H+ transporting, lyso | <a href="#">Atp6v1e1</a>           | 0.782 | -3.672 | 0.00754234  | 0.0557411  |
| 19385 | 10400892 | <a href="#">XR_034366</a>          | <a href="#">666213</a> | similar to glyceraldehyde-3-ph | <a href="#">LOC666213</a>          | 0.782 | -2.736 | 0.0282606   | 0.137931   |
| 19386 | 10503210 | <a href="#">NM_001081417</a>       | <a href="#">320790</a> | chromodomain helicase DNA bind | <a href="#">Chd7</a>               | 0.782 | -2.594 | 0.0348079   | 0.158375   |
| 19387 | 10543709 | <a href="#">NM_178625</a>          | <a href="#">72649</a>  | transmembrane protein 209      | <a href="#">Tmem209</a>            | 0.782 | -4.756 | 0.00190782  | 0.0208686  |
| 19388 | 10392440 | <a href="#">NM_001029842</a>       | <a href="#">104681</a> | solute carrier family 16 (mono | <a href="#">Slc16a6</a>            | 0.782 | -2.816 | 0.0251263   | 0.127832   |
| 19389 | 10426921 | <a href="#">NM_011873</a>          | <a href="#">23994</a>  | DAZ associated protein 2       | <a href="#">Dazap2</a>             | 0.782 | -3.445 | 0.0102731   | 0.0692867  |
| 19390 | 10526181 | <a href="#">NM_030719</a>          | <a href="#">80909</a>  | opposite strand transcription  | <a href="#">Gats</a>               | 0.781 | -5.418 | 0.000895607 | 0.0121156  |
| 19391 | 10446965 | <a href="#">NM_207246</a>          | <a href="#">240168</a> | RAS, guanyl releasing protein  | <a href="#">Rasgrp3</a>            | 0.781 | -1.979 | 0.0870698   | 0.283974   |
| 19392 | 10383206 | <a href="#">ENSMUST00000093902</a> | <a href="#">672511</a> | hypothetical LOC672511         | <a href="#">LOC672511</a>          | 0.781 | -2.942 | 0.0209284   | 0.113291   |
| 19393 | 10461668 | <a href="#">NM_146410</a>          | <a href="#">258405</a> | olfactory receptor 1420        | <a href="#">Olf1420</a>            | 0.781 | -1.845 | 0.106384    | 0.321662   |
| 19394 | 10492522 | <a href="#">NM_001113421</a>       | <a href="#">30953</a>  | schwannomin interacting protei | <a href="#">Schip1</a>             | 0.781 | -4.677 | 0.00209493  | 0.0225077  |
| 19395 | 10570291 | <a href="#">NM_007972</a>          | <a href="#">14058</a>  | coagulation factor X           | <a href="#">F10</a>                | 0.781 | -4.749 | 0.00192322  | 0.0209827  |
| 19396 | 10351043 |                                    |                        |                                |                                    | 0.781 | -3.961 | 0.00513381  | 0.0420571  |
| 19397 | 10542397 | <a href="#">NM_177688</a>          | <a href="#">232440</a> | H2A histone family, member J   | <a href="#">H2afj</a>              | 0.781 | -4.231 | 0.00363154  | 0.0326632  |
| 19398 | 10594241 | <a href="#">ENSMUST00000063858</a> | <a href="#">791387</a> | predicted gene, ENSMUSG0000005 | <a href="#">ENSMUSG00000052143</a> | 0.781 | -2.048 | 0.0785896   | 0.266854   |
| 19399 | 10406276 |                                    |                        |                                |                                    | 0.781 | -3.644 | 0.00782357  | 0.0571207  |
| 19400 | 10516910 | <a href="#">NM_175306</a>          | <a href="#">100169</a> | phosphatase and actin regulato | <a href="#">Phactr4</a>            | 0.781 | -4.93  | 0.001554    | 0.0178672  |
| 19401 | 10532630 | <a href="#">NM_177078</a>          | <a href="#">320129</a> | adrenergic receptor kinase, be | <a href="#">Adrbk2</a>             | 0.78  | -2.211 | 0.061633    | 0.22935    |
| 19402 | 10538658 | <a href="#">NM_028705</a>          | <a href="#">73998</a>  | hect domain and RLD 3          | <a href="#">Herc3</a>              | 0.78  | -3.073 | 0.0173267   | 0.0994394  |
| 19403 | 10438400 | <a href="#">NM_010922</a>          | <a href="#">18100</a>  | mitochondrial ribosomal protei | <a href="#">Mrpl40</a>             | 0.78  | -3.917 | 0.00544445  | 0.0439379  |
| 19404 | 10368199 | <a href="#">NM_010848</a>          | <a href="#">17863</a>  | myeloblastosis oncogene        | <a href="#">Myb</a>                | 0.78  | -2.875 | 0.0230797   | 0.120761   |
| 19405 | 10408008 |                                    |                        |                                |                                    | 0.78  | -1.33  | 0.22402     | 0.494176   |
| 19406 | 10580231 | <a href="#">XR_031475</a>          | <a href="#">546080</a> | similar to ATP synthase, H+ tr | <a href="#">LOC546080</a>          | 0.78  | -1.858 | 0.104294    | 0.31773    |
| 19407 | 10458992 | <a href="#">ENSMUST00000025488</a> | <a href="#">77422</a>  | RIKEN cDNA C330018D20 gene     | <a href="#">C330018D20Rik</a>      | 0.78  | -4.574 | 0.00237393  | 0.024593   |
| 19408 | 10531133 | <a href="#">NM_178700</a>          | <a href="#">231413</a> | G-rich RNA sequence binding fa | <a href="#">Grsf1</a>              | 0.78  | -4.609 | 0.002275    | 0.0238935  |
| 19409 | 10461930 | <a href="#">BC020125</a>           | <a href="#">225995</a> | RIKEN cDNA D030056L22 gene     | <a href="#">D030056L22Rik</a>      | 0.78  | -3.023 | 0.0186256   | 0.104545   |
| 19410 | 10491014 | <a href="#">NM_009210</a>          | <a href="#">20585</a>  | helicase-like transcription fa | <a href="#">Hlhf</a>               | 0.78  | -5.244 | 0.00108648  | 0.0139228  |
| 19411 | 10408477 | <a href="#">NM_010093</a>          | <a href="#">13557</a>  | E2F transcription factor 3     | <a href="#">E2f3</a>               | 0.779 | -2.458 | 0.0426098   | 0.180844   |
| 19412 | 10597564 | <a href="#">BC056653</a>           | <a href="#">67899</a>  | RIKEN cDNA 2010110K16 gene     | <a href="#">2010110K16Rik</a>      | 0.779 | -3.672 | 0.00753423  | 0.0557201  |
| 19413 | 10437735 |                                    |                        |                                |                                    | 0.779 | -2.109 | 0.0717381   | 0.251634   |
| 19414 | 10489484 | <a href="#">NM_011521</a>          | <a href="#">20971</a>  | syndecan 4                     | <a href="#">Sdc4</a>               | 0.779 | -3.706 | 0.00720105  | 0.0537638  |
| 19415 | 10422024 |                                    |                        |                                |                                    | 0.779 | -1.755 | 0.121416    | 0.347955   |
| 19416 | 10427494 |                                    |                        |                                |                                    | 0.779 | -2.61  | 0.0340111   | 0.156      |
| 19417 | 10497894 | <a href="#">NM_145825</a>          | <a href="#">207175</a> | centrin 4                      | <a href="#">Cetn4</a>              | 0.779 | -3.667 | 0.00759274  | 0.056033   |
| 19418 | 10469720 | <a href="#">NM_001102437</a>       | <a href="#">74159</a>  | acyl-Coenzyme A binding domain | <a href="#">Acbd5</a>              | 0.779 | -3.081 | 0.0171315   | 0.0987807  |
| 19419 | 10523670 | <a href="#">NM_001080798</a>       | <a href="#">17355</a>  | AF4/FMR2 family, member 1      | <a href="#">Aff1</a>               | 0.779 | -2.404 | 0.0462014   | 0.190903   |
| 19420 | 10451003 | <a href="#">NM_009027</a>          | <a href="#">20106</a>  | DNA segment, Chr 17, Wayne     | <a href="#">D17Way104</a>          | 0.779 | -2.474 | 0.0008725   | 0.0674002  |

|       |          |                                    |                           |                                |                                    |       |        |             |            |
|-------|----------|------------------------------------|---------------------------|--------------------------------|------------------------------------|-------|--------|-------------|------------|
| 19420 | 10431993 | <a href="#">NM_060657</a>          | <a href="#">26100</a>     | Sta                            | <a href="#">D17wsu104c</a>         | 0.779 | -3.474 | 0.0098723   | 0.0074892  |
| 19421 | 10413826 | <a href="#">NM_145460</a>          | <a href="#">218885</a>    | oxidoreductase NAD-binding dom | <a href="#">Oxnad1</a>             | 0.779 | -3.343 | 0.0118443   | 0.0761899  |
| 19422 | 10421697 | <a href="#">BC116748</a>           | <a href="#">210808</a>    | RIKEN cDNA 9030625A04 gene     | <a href="#">9030625A04Rik</a>      | 0.779 | -3.597 | 0.00834351  | 0.05964    |
| 19423 | 10575184 | <a href="#">NM_025830</a>          | <a href="#">66894</a>     | WW domain containing E3 ubiqui | <a href="#">Wwp2</a>               | 0.779 | -4.394 | 0.00295982  | 0.0284724  |
| 19424 | 10489553 | <a href="#">NM_133240</a>          | <a href="#">170789</a>    | acyl-CoA thioesterase 8        | <a href="#">Acot8</a>              | 0.779 | -2.872 | 0.02318     | 0.120967   |
| 19425 | 10591884 | <a href="#">NM_153803</a>          | <a href="#">244757</a>    | galactosidase, beta 1-like 2   | <a href="#">Glb1l2</a>             | 0.778 | -3.921 | 0.00541475  | 0.0437454  |
| 19426 | 10530477 | <a href="#">NM_133921</a>          | <a href="#">100978</a>    | nuclear transcription factor,  | <a href="#">Nfxl1</a>              | 0.778 | -4.052 | 0.0045629   | 0.0385142  |
| 19427 | 10353871 | <a href="#">NM_001013374</a>       | <a href="#">214895</a>    | lectin, mannose-binding 2-like | <a href="#">Lman2l</a>             | 0.778 | -2.186 | 0.0638938   | 0.23479    |
| 19428 | 10495993 | <a href="#">NM_130450</a>          | <a href="#">170439</a>    | ELOVL family member 6, elongat | <a href="#">Elov16</a>             | 0.778 | -4.041 | 0.00462693  | 0.0389303  |
| 19429 | 10448803 | <a href="#">NM_198937</a>          | <a href="#">52009</a>     | hematological and neurological | <a href="#">Hn1l</a>               | 0.778 | -3.146 | 0.0156195   | 0.0928214  |
| 19430 | 10440566 | <a href="#">NM_001081068</a>       | <a href="#">78913</a>     | zinc finger protein 294        | <a href="#">Zfp294</a>             | 0.778 | -0.913 | 0.390699    | 0.659209   |
| 19431 | 10536931 | <a href="#">NM_021414</a>          | <a href="#">74340</a>     | S-adenosylhomocysteine hydrola | <a href="#">Ahcy12</a>             | 0.778 | -4.637 | 0.00219897  | 0.0233174  |
| 19432 | 10478854 | <a href="#">NM_148929</a>          | <a href="#">77031</a>     | solute carrier family 9 (sodi  | <a href="#">Slc9a8</a>             | 0.778 | -5.065 | 0.00133082  | 0.0161162  |
| 19433 | 10415604 | <a href="#">ENSMUST00000100511</a> | <a href="#">100038565</a> | predicted gene, ENSMUSG0000007 | <a href="#">ENSMUSG00000075582</a> | 0.778 | -2.069 | 0.076196    | 0.261455   |
| 19434 | 10371607 | <a href="#">NM_027878</a>          | <a href="#">71712</a>     | RIKEN cDNA 1200002N14 gene     | <a href="#">1200002N14Rik</a>      | 0.777 | -3.658 | 0.00767996  | 0.0564033  |
| 19435 | 10536369 | <a href="#">NM_052993</a>          | <a href="#">94192</a>     | core 1 synthase, glycoprotein- | <a href="#">C1galt1</a>            | 0.777 | -3.651 | 0.00775497  | 0.0567964  |
| 19436 | 10592585 | <a href="#">NM_172769</a>          | <a href="#">235293</a>    | sterol-C5-desaturase (fungal E | <a href="#">Sc5d</a>               | 0.777 | -2.411 | 0.0457      | 0.189244   |
| 19437 | 10402560 | <a href="#">AK079474</a>           | <a href="#">319630</a>    | RIKEN cDNA A130014H13 gene     | <a href="#">A130014H13Rik</a>      | 0.777 | -1.164 | 0.281329    | 0.556831   |
| 19438 | 10475912 | <a href="#">NM_028248</a>          | <a href="#">72477</a>     | transmembrane protein 87B      | <a href="#">Tmem87b</a>            | 0.777 | -3.495 | 0.00958712  | 0.0659434  |
| 19439 | 10468275 | <a href="#">NM_027654</a>          | <a href="#">71041</a>     | polycomb group ring finger 6   | <a href="#">Pcgf6</a>              | 0.777 | -3.848 | 0.0059618   | 0.0467952  |
| 19440 | 10405964 | <a href="#">BC119515</a>           | <a href="#">69315</a>     | RIKEN cDNA 1700001L19 gene     | <a href="#">1700001L19Rik</a>      | 0.777 | -4.295 | 0.00334853  | 0.0308637  |
| 19441 | 10416791 |                                    |                           |                                |                                    | 0.777 | -3.541 | 0.00900658  | 0.0630163  |
| 19442 | 10423333 | <a href="#">BC019494</a>           | <a href="#">66270</a>     | RIKEN cDNA 1810015C04 gene     | <a href="#">1810015C04Rik</a>      | 0.777 | -3.686 | 0.00739572  | 0.0548555  |
| 19443 | 10494735 | <a href="#">NM_010269</a>          | <a href="#">14547</a>     | ganglioside-induced differenti | <a href="#">Gdap2</a>              | 0.776 | -3.352 | 0.0116901   | 0.0755041  |
| 19444 | 10399046 | <a href="#">NM_009511</a>          | <a href="#">22355</a>     | vasoactive intestinal peptide  | <a href="#">Vipr2</a>              | 0.776 | -2.9   | 0.0222283   | 0.117411   |
| 19445 | 10423155 | <a href="#">NM_172958</a>          | <a href="#">268783</a>    | myotubularin related protein 1 | <a href="#">Mtmr12</a>             | 0.776 | -3.83  | 0.00610253  | 0.0474981  |
| 19446 | 10449401 | <a href="#">NM_013687</a>          | <a href="#">21463</a>     | t-complex protein 11           | <a href="#">Tep11</a>              | 0.776 | -2.742 | 0.0280065   | 0.137267   |
| 19447 | 10365926 | <a href="#">AK165804</a>           | <a href="#">414105</a>    | RIKEN cDNA 4732465J04 gene     | <a href="#">4732465J04Rik</a>      | 0.776 | -2.693 | 0.0301158   | 0.144163   |
| 19448 | 10395807 | <a href="#">BC034876</a>           | <a href="#">66132</a>     | RIKEN cDNA 1110008L16 gene     | <a href="#">1110008L16Rik</a>      | 0.776 | -4.353 | 0.00311592  | 0.0294515  |
| 19449 | 10500327 | <a href="#">NM_054045</a>          | <a href="#">97114</a>     | histone cluster 2, H3c2        | <a href="#">Hist2h3c2</a>          | 0.776 | -0.94  | 0.377795    | 0.647597   |
| 19450 | 10594501 | <a href="#">NM_021345</a>          | <a href="#">57874</a>     | protein tyrosine phosphatase-1 | <a href="#">Ptplad1</a>            | 0.776 | -4.684 | 0.00207913  | 0.0223721  |
| 19451 | 10344813 | <a href="#">NM_026493</a>          | <a href="#">211660</a>    | centrosome and spindle pole as | <a href="#">Cspp1</a>              | 0.776 | -1.941 | 0.0921654   | 0.294263   |
| 19452 | 10526897 | <a href="#">NM_024451</a>          | <a href="#">77053</a>     | unc-84 homolog A (C. elegans)  | <a href="#">Unc84a</a>             | 0.776 | -5.711 | 0.00065369  | 0.00977484 |
| 19453 | 10594183 | <a href="#">NM_027838</a>          | <a href="#">71599</a>     | SUMO/sentrin specific peptidas | <a href="#">Senp8</a>              | 0.776 | -4.251 | 0.00353917  | 0.0320343  |
| 19454 | 10407704 |                                    |                           |                                |                                    | 0.776 | -1.827 | 0.109147    | 0.326375   |
| 19455 | 10426751 | <a href="#">NM_026669</a>          | <a href="#">110213</a>    | testis enhanced gene transcrip | <a href="#">Tegt</a>               | 0.776 | -3.91  | 0.00549103  | 0.0441924  |
| 19456 | 10461798 | <a href="#">NM_001011840</a>       | <a href="#">258120</a>    | olfactory receptor 1463        | <a href="#">Olfr1463</a>           | 0.775 | -3.014 | 0.0188559   | 0.105433   |
| 19457 | 10598023 |                                    |                           |                                |                                    | 0.775 | -2.24  | 0.0590153   | 0.223583   |
| 19458 | 10367973 | <a href="#">NM_025446</a>          | <a href="#">66253</a>     | androgen-induced 1             | <a href="#">Aig1</a>               | 0.775 | -4.184 | 0.00385121  | 0.0340426  |
| 19459 | 10503192 | <a href="#">NM_001081417</a>       | <a href="#">320790</a>    | chromodomain helicase DNA bind | <a href="#">Chd7</a>               | 0.775 | -1.713 | 0.129187    | 0.360384   |
| 19460 | 10564839 | <a href="#">NM_009682</a>          | <a href="#">11778</a>     | adaptor-related protein comple | <a href="#">Ap3s2</a>              | 0.775 | -5.578 | 0.000753039 | 0.0108021  |
| 19461 | 10411156 | <a href="#">NM_029153</a>          | <a href="#">107767</a>    | secretory carrier membrane pro | <a href="#">Scamp1</a>             | 0.775 | -3.384 | 0.01118     | 0.0732086  |
| 19462 | 10498307 | <a href="#">XM_887553</a>          | <a href="#">623114</a>    | predicted gene, EG623114       | <a href="#">EG623114</a>           | 0.775 | -2.581 | 0.0355235   | 0.160527   |
| 19463 | 10478587 | <a href="#">NM_178375</a>          | <a href="#">67538</a>     | zinc finger, SWIM domain conta | <a href="#">Zswim3</a>             | 0.775 | -4.593 | 0.00231748  | 0.024131   |
| 19464 | 10462195 | <a href="#">NM_181404</a>          | <a href="#">107351</a>    | KN motif and ankyrin repeat do | <a href="#">Kank1</a>              | 0.775 | -3.406 | 0.0108439   | 0.0716946  |
| 19465 | 10474419 | <a href="#">NM_172671</a>          | <a href="#">107515</a>    | leucine-rich repeat-containing | <a href="#">Lgr4</a>               | 0.775 | -2.634 | 0.0328276   | 0.152417   |
| 19466 | 10588683 | <a href="#">NM_010489</a>          | <a href="#">15587</a>     | hyaluronoglucosaminidase 2     | <a href="#">Hyal2</a>              | 0.775 | -4.998 | 0.00143657  | 0.0168562  |
| 19467 | 10563191 | <a href="#">NM_175130</a>          | <a href="#">68667</a>     | transient receptor potential c | <a href="#">Trpm4</a>              | 0.775 | -4.078 | 0.00441595  | 0.0375134  |
| 19468 | 10445494 |                                    |                           |                                |                                    | 0.774 | -3.761 | 0.00669272  | 0.0508666  |
| 19469 | 10583145 | <a href="#">NM_133739</a>          | <a href="#">71929</a>     | transmembrane protein 123      | <a href="#">Tmem123</a>            | 0.774 | -4.283 | 0.00340181  | 0.0311965  |

|       |          |                                    |                           |                                |                               |       |        |             |            |
|-------|----------|------------------------------------|---------------------------|--------------------------------|-------------------------------|-------|--------|-------------|------------|
| 19470 | 10561485 | <a href="#">NM_027470</a>          | <a href="#">70584</a>     | p21 (CDKN1A)-activated kinase  | <a href="#">Pak4</a>          | 0.774 | -3.52  | 0.00927379  | 0.0643957  |
| 19471 | 10500283 | <a href="#">NM_011797</a>          | <a href="#">23831</a>     | carbonic anhydrase 14          | <a href="#">Car14</a>         | 0.774 | -5.342 | 0.000973562 | 0.0128576  |
| 19472 | 10430489 | <a href="#">NM_016915</a>          | <a href="#">53357</a>     | phospholipase A2, group VI     | <a href="#">Pla2g6</a>        | 0.774 | -5.022 | 0.00139808  | 0.016658   |
| 19473 | 10359422 | <a href="#">NM_007453</a>          | <a href="#">11758</a>     | peroxiredoxin 6                | <a href="#">Prdx6</a>         | 0.774 | -4.552 | 0.00243863  | 0.024997   |
| 19474 | 10355452 |                                    |                           |                                |                               | 0.773 | -2.68  | 0.0306773   | 0.145769   |
| 19475 | 10569278 | <a href="#">ENSMUST00000051217</a> | <a href="#">71434</a>     | RIKEN cDNA 5530400B01 gene     | <a href="#">5530400B01Rik</a> | 0.773 | -1.875 | 0.101616    | 0.312332   |
| 19476 | 10547054 | <a href="#">XR_034896</a>          | <a href="#">100043759</a> | similar to RNA polymerase II T | <a href="#">LOC100043759</a>  | 0.773 | -2.478 | 0.0413835   | 0.177544   |
| 19477 | 10455784 | <a href="#">NM_026240</a>          | <a href="#">107022</a>    | GRAM domain containing 3       | <a href="#">Gramd3</a>        | 0.773 | -4.091 | 0.00433852  | 0.0370043  |
| 19478 | 10523754 |                                    |                           |                                |                               | 0.773 | -1.28  | 0.240129    | 0.513219   |
| 19479 | 10543249 | <a href="#">BC120768</a>           | <a href="#">232599</a>    | predicted gene, EG232599       | <a href="#">EG232599</a>      | 0.773 | -3.43  | 0.0104848   | 0.0702     |
| 19480 | 10603266 | <a href="#">NM_001031664</a>       | <a href="#">102954</a>    | nudix (nucleoside diphosphate  | <a href="#">Nudt10</a>        | 0.773 | -2.315 | 0.052754    | 0.207909   |
| 19481 | 10489241 | <a href="#">ENSMUST00000099127</a> | <a href="#">329554</a>    | gene model 826, (NCBI)         | <a href="#">Gm826</a>         | 0.773 | -3.351 | 0.011704    | 0.0755169  |
| 19482 | 10419240 | <a href="#">NM_001042719</a>       | <a href="#">114874</a>    | DDHD domain containing 1       | <a href="#">Ddhd1</a>         | 0.773 | -3.109 | 0.0164717   | 0.0962891  |
| 19483 | 10409345 | <a href="#">NM_028870</a>          | <a href="#">74325</a>     | clathrin, light polypeptide (L | <a href="#">Cltb</a>          | 0.773 | -5.375 | 0.00093868  | 0.0125696  |
| 19484 | 10583634 | <a href="#">NM_021888</a>          | <a href="#">60507</a>     | queuine tRNA-ribosyltransferas | <a href="#">Qtrt1</a>         | 0.773 | -5.1   | 0.00127867  | 0.0157367  |
| 19485 | 10499431 | <a href="#">NM_018804</a>          | <a href="#">229521</a>    | synaptotagmin XI               | <a href="#">Syt11</a>         | 0.773 | -2.88  | 0.0229059   | 0.120209   |
| 19486 | 10448731 | <a href="#">NM_026205</a>          | <a href="#">67504</a>     | ring finger protein 151        | <a href="#">Rnf151</a>        | 0.772 | -3.848 | 0.00595646  | 0.0467952  |
| 19487 | 10590343 | <a href="#">NM_175114</a>          | <a href="#">67095</a>     | trafficking protein, kinesin b | <a href="#">Trak1</a>         | 0.772 | -6.375 | 0.00033235  | 0.00607891 |
| 19488 | 10512901 | <a href="#">NM_178603</a>          | <a href="#">28028</a>     | mitochondrial ribosomal protei | <a href="#">Mrpl50</a>        | 0.772 | -6.25  | 0.000376009 | 0.00661426 |
| 19489 | 10434248 | <a href="#">NM_001033164</a>       | <a href="#">72307</a>     | RIKEN cDNA 2510002D24 gene     | <a href="#">2510002D24Rik</a> | 0.772 | -4.275 | 0.00343564  | 0.0314073  |
| 19490 | 10593668 | <a href="#">BC023075</a>           | <a href="#">235380</a>    | Dmx-like 2                     | <a href="#">Dmx12</a>         | 0.772 | -4.733 | 0.00195923  | 0.021255   |
| 19491 | 10349671 | <a href="#">NM_177243</a>          | <a href="#">320718</a>    | solute carrier family 26, memb | <a href="#">Slc26a9</a>       | 0.772 | -5.45  | 0.00086533  | 0.0118271  |
| 19492 | 10537499 | <a href="#">NM_001025385</a>       | <a href="#">574417</a>    | taste receptor, type 2, member | <a href="#">Tas2r137</a>      | 0.772 | -1.312 | 0.229811    | 0.500888   |
| 19493 | 10363190 |                                    |                           |                                |                               | 0.772 | -2.956 | 0.0205237   | 0.112026   |
| 19494 | 10402473 | <a href="#">NM_053155</a>          | <a href="#">94040</a>     | calmin                         | <a href="#">Clmn</a>          | 0.772 | -2.643 | 0.0324066   | 0.151237   |
| 19495 | 10415282 | <a href="#">NM_011189</a>          | <a href="#">19186</a>     | proteasome (prosome, macropain | <a href="#">Psmc1</a>         | 0.772 | -5.556 | 0.000771306 | 0.0109674  |
| 19496 | 10400883 | <a href="#">NM_013896</a>          | <a href="#">30056</a>     | translocase of inner mitochond | <a href="#">Timm9</a>         | 0.772 | -3.911 | 0.0054856   | 0.0441916  |
| 19497 | 10366739 |                                    |                           |                                |                               | 0.772 | -2.306 | 0.0534139   | 0.209689   |
| 19498 | 10438096 |                                    |                           |                                |                               | 0.772 | -1.558 | 0.16183     | 0.410131   |
| 19499 | 10448312 | <a href="#">NM_020293</a>          | <a href="#">56863</a>     | claudin 9                      | <a href="#">Cldn9</a>         | 0.772 | -5.049 | 0.00135439  | 0.016299   |
| 19500 | 10467162 | <a href="#">NM_023792</a>          | <a href="#">75735</a>     | pantothenate kinase 1          | <a href="#">Pank1</a>         | 0.772 | -2.402 | 0.046325    | 0.191233   |
| 19501 | 10464877 | <a href="#">NM_133803</a>          | <a href="#">75221</a>     | dipeptidylpeptidase 3          | <a href="#">Dpp3</a>          | 0.772 | -4.947 | 0.00152387  | 0.0176166  |
| 19502 | 10494565 | <a href="#">NM_010232</a>          | <a href="#">14263</a>     | flavin containing monooxygenas | <a href="#">Fmo5</a>          | 0.772 | -3.493 | 0.00962172  | 0.0661599  |
| 19503 | 10602454 | <a href="#">NM_198105</a>          | <a href="#">207375</a>    | open reading frame 34          | <a href="#">ORF34</a>         | 0.772 | -4.643 | 0.00218326  | 0.0231857  |
| 19504 | 10451670 | <a href="#">NM_027292</a>          | <a href="#">70026</a>     | benzodiazapine receptor, perip | <a href="#">Bzrp11</a>        | 0.771 | -2.818 | 0.0250662   | 0.127643   |
| 19505 | 10404059 | <a href="#">NM_015786</a>          | <a href="#">50708</a>     | histone cluster 1, H1c         | <a href="#">Hist1h1c</a>      | 0.771 | -3.076 | 0.0172665   | 0.0993421  |
| 19506 | 10412060 | <a href="#">XR_032565</a>          | <a href="#">668123</a>    | similar to ribosomal protein L | <a href="#">LOC668123</a>     | 0.771 | -6.006 | 0.000480975 | 0.00785915 |
| 19507 | 10563314 | <a href="#">NM_027903</a>          | <a href="#">71755</a>     | dihydrodiol dehydrogenase (dim | <a href="#">Dhdh</a>          | 0.771 | -4.894 | 0.00162162  | 0.0184342  |
| 19508 | 10506170 | <a href="#">NM_145549</a>          | <a href="#">230500</a>    | EF-hand calcium binding domain | <a href="#">Efcab7</a>        | 0.771 | -4.145 | 0.00404923  | 0.0353059  |
| 19509 | 10531437 | <a href="#">NM_007644</a>          | <a href="#">12492</a>     | scavenger receptor class B, me | <a href="#">Scarb2</a>        | 0.771 | -3.564 | 0.00872622  | 0.0615845  |
| 19510 | 10355813 | <a href="#">NM_008985</a>          | <a href="#">19275</a>     | protein tyrosine phosphatase,  | <a href="#">Ptpn</a>          | 0.771 | -4.123 | 0.00416484  | 0.0359141  |
| 19511 | 10522051 | <a href="#">NM_008453</a>          | <a href="#">16599</a>     | Kruppel-like factor 3 (basic)  | <a href="#">Klf3</a>          | 0.771 | -5.48  | 0.000837253 | 0.011563   |
| 19512 | 10469056 | <a href="#">ENSMUST00000116105</a> | <a href="#">381346</a>    | similar to ribosomal protein L | <a href="#">LOC381346</a>     | 0.771 | -2.572 | 0.036005    | 0.161839   |
| 19513 | 10550406 | <a href="#">ENSMUST00000094805</a> | <a href="#">434130</a>    | hypothetical LOC434130         | <a href="#">LOC434130</a>     | 0.771 | -3.97  | 0.00507721  | 0.0417714  |
| 19514 | 10383214 | <a href="#">AK173199</a>           | <a href="#">629974</a>    | ring finger protein 213        | <a href="#">Rnf213</a>        | 0.771 | -3.07  | 0.0174121   | 0.0997508  |
| 19515 | 10605172 | <a href="#">NM_019870</a>          | <a href="#">56292</a>     | N-acetyltransferase ARD1 homol | <a href="#">Ard1</a>          | 0.771 | -4.31  | 0.00328708  | 0.0304606  |
| 19516 | 10486191 | <a href="#">NM_028104</a>          | <a href="#">72112</a>     | protein phosphatase 1, regulat | <a href="#">Ppp1r14d</a>      | 0.771 | -3.348 | 0.0117557   | 0.0757083  |
| 19517 | 10344789 | <a href="#">NM_026493</a>          | <a href="#">211660</a>    | centrosome and spindle pole as | <a href="#">Cspp1</a>         | 0.771 | -3.285 | 0.0128317   | 0.080676   |
| 19518 | 10533320 | <a href="#">NM_172125</a>          | <a href="#">280667</a>    | a disintegrin and metallopepti | <a href="#">Adam1b</a>        | 0.77  | -4.325 | 0.0032252   | 0.0301093  |
| 19519 | 10450892 | <a href="#">NM_146289</a>          | <a href="#">258286</a>    | olfactory receptor 113         | <a href="#">Olfr113</a>       | 0.77  | -2.819 | 0.0250178   | 0.127548   |
| 19520 | 10450206 | <a href="#">NM_019403</a>          | <a href="#">54197</a>     | ring finger protein 5          | <a href="#">Rnf5</a>          | 0.77  | -3.077 | 0.0172321   | 0.0992523  |
| 19521 | 10400760 |                                    |                           |                                |                               | 0.77  | -2.726 | 0.0286743   | 0.139025   |
| 19522 | 10559343 | <a href="#">NM_001113373</a>       | <a href="#">210274</a>    | SH3/ankyrin domain gene 2      | <a href="#">Shank2</a>        | 0.77  | -3.465 | 0.00999129  | 0.0680694  |
| 19523 | 10522976 | <a href="#">NM_027530</a>          | <a href="#">52822</a>     | RUN and FYVE domain containing | <a href="#">Rufy3</a>         | 0.77  | -4.742 | 0.0019385   | 0.0210933  |

|       |          |                                    |                           | Containing                     |                                    |       |        |             |            |
|-------|----------|------------------------------------|---------------------------|--------------------------------|------------------------------------|-------|--------|-------------|------------|
| 19524 | 10606182 |                                    |                           |                                |                                    | 0.77  | -1.053 | 0.326214    | 0.602683   |
| 19525 | 10441530 | <a href="#">NM_031395</a>          | <a href="#">83672</a>     | synaptotagmin-like 3           | <a href="#">Syt13</a>              | 0.77  | -2.156 | 0.0669126   | 0.241599   |
| 19526 | 10571752 | <a href="#">NM_178788</a>          | <a href="#">320685</a>    | dCMP deaminase                 | <a href="#">Dctd</a>               | 0.77  | -3.829 | 0.00610799  | 0.0474981  |
| 19527 | 10365219 | <a href="#">DQ459435</a>           | <a href="#">237412</a>    | predicted gene, EG237412       | <a href="#">EG237412</a>           | 0.77  | -2.552 | 0.0370506   | 0.165169   |
| 19528 | 10564869 | <a href="#">NM_011870</a>          | <a href="#">23991</a>     | calcium and integrin binding 1 | <a href="#">Cib1</a>               | 0.77  | -3.6   | 0.00830995  | 0.0594604  |
| 19529 | 10370376 | <a href="#">NM_008826</a>          | <a href="#">18641</a>     | phosphofructokinase, liver, B- | <a href="#">Pfk1</a>               | 0.77  | -4.76  | 0.00189746  | 0.0207875  |
| 19530 | 10351045 |                                    |                           |                                |                                    | 0.77  | -2.703 | 0.0296407   | 0.142372   |
| 19531 | 10388861 | <a href="#">NM_199199</a>          | <a href="#">195040</a>    | transmembrane protein 199      | <a href="#">Tmem199</a>            | 0.77  | -3.976 | 0.00503863  | 0.0415985  |
| 19532 | 10500666 | <a href="#">NM_011197</a>          | <a href="#">19221</a>     | prostaglandin F2 receptor nega | <a href="#">Ptgfrn</a>             | 0.77  | -6.046 | 0.000461752 | 0.00764028 |
| 19533 | 10401028 | <a href="#">NM_030750</a>          | <a href="#">81535</a>     | sphingosine-1-phosphate phosph | <a href="#">Sgpp1</a>              | 0.77  | -2.17  | 0.0654687   | 0.238533   |
| 19534 | 10594679 | <a href="#">NM_001081242</a>       | <a href="#">70549</a>     | talin 2                        | <a href="#">Tln2</a>               | 0.77  | -5.075 | 0.00131523  | 0.0159824  |
| 19535 | 10424126 | <a href="#">NM_001037937</a>       | <a href="#">97998</a>     | DEP domain containing 6        | <a href="#">Depdc6</a>             | 0.77  | -4.376 | 0.00302801  | 0.0289701  |
| 19536 | 10581824 | <a href="#">NM_178086</a>          | <a href="#">338521</a>    | fatty acid 2-hydroxylase       | <a href="#">Fa2h</a>               | 0.77  | -3.186 | 0.0147638   | 0.0892159  |
| 19537 | 10552008 | <a href="#">NM_018731</a>          | <a href="#">11944</a>     | ATPase, H+/K+ exchanging, gast | <a href="#">Atp4a</a>              | 0.769 | -5.192 | 0.00115196  | 0.0145155  |
| 19538 | 10477572 | <a href="#">NM_029362</a>          | <a href="#">75608</a>     | chromatin modifying protein 4B | <a href="#">Chmp4b</a>             | 0.769 | -5.02  | 0.00140025  | 0.016658   |
| 19539 | 10569024 | <a href="#">NM_023059</a>          | <a href="#">24058</a>     | single immunoglobulin and toll | <a href="#">Sigirr</a>             | 0.769 | -3.032 | 0.0183856   | 0.103555   |
| 19540 | 10456378 | <a href="#">NM_024190</a>          | <a href="#">67064</a>     | chromatin modifying protein 1B | <a href="#">Chmp1b</a>             | 0.769 | -4.396 | 0.00295078  | 0.0284299  |
| 19541 | 10587532 | <a href="#">AK085082</a>           | <a href="#">546150</a>    | predicted gene, EG546150       | <a href="#">EG546150</a>           | 0.769 | -3.009 | 0.0190058   | 0.105975   |
| 19542 | 10577217 | <a href="#">XR_032429</a>          | <a href="#">665516</a>    | similar to 3-phosphoglycerate  | <a href="#">LOC665516</a>          | 0.769 | -1.568 | 0.159595    | 0.406955   |
| 19543 | 10580247 | <a href="#">NM_019945</a>          | <a href="#">56527</a>     | microtubule associated serine/ | <a href="#">Mast1</a>              | 0.769 | -2.83  | 0.024632    | 0.126168   |
| 19544 | 10530013 | <a href="#">BC025881</a>           | <a href="#">242997</a>    | gene model 447, (NCBI)         | <a href="#">Gm447</a>              | 0.769 | -3.982 | 0.00499672  | 0.041302   |
| 19545 | 10552118 | <a href="#">XM_001481141</a>       | <a href="#">100043865</a> | similar to SMT3B protein       | <a href="#">LOC100043865</a>       | 0.768 | -2.563 | 0.0364519   | 0.163223   |
| 19546 | 10587627 | <a href="#">NM_024195</a>          | <a href="#">266690</a>    | cytochrome b5 reductase 4      | <a href="#">Cyb5r4</a>             | 0.768 | -3.403 | 0.0108904   | 0.0718818  |
| 19547 | 10604505 | <a href="#">BC066100</a>           | <a href="#">103012</a>    | RIKEN cDNA 6720401G13 gene     | <a href="#">6720401G13Rik</a>      | 0.768 | -3.827 | 0.00612515  | 0.0475856  |
| 19548 | 10362803 | <a href="#">NM_016898</a>          | <a href="#">53599</a>     | CD164 antigen                  | <a href="#">Cd164</a>              | 0.768 | -4.679 | 0.00209084  | 0.0224752  |
| 19549 | 10474369 | <a href="#">NM_177110</a>          | <a href="#">320230</a>    | RIKEN cDNA C130023O10 gene     | <a href="#">C130023O10Rik</a>      | 0.768 | -1.477 | 0.181864    | 0.438215   |
| 19550 | 10607336 | <a href="#">NM_025660</a>          | <a href="#">66611</a>     | RIB43A domain with coiled-coil | <a href="#">Ribe1</a>              | 0.768 | -2.995 | 0.0193789   | 0.107409   |
| 19551 | 10408762 | <a href="#">NM_025380</a>          | <a href="#">66143</a>     | eukaryotic translation elongat | <a href="#">Eef1e1</a>             | 0.768 | -5.566 | 0.000762432 | 0.0108704  |
| 19552 | 10605067 | <a href="#">NM_012040</a>          | <a href="#">93843</a>     | pregnancy upregulated non-ubiq | <a href="#">Pnck</a>               | 0.768 | -5.471 | 0.000845736 | 0.0116421  |
| 19553 | 10386992 | <a href="#">ENSMUST00000108696</a> | <a href="#">74282</a>     | RIKEN cDNA 1700086D15 gene     | <a href="#">1700086D15Rik</a>      | 0.768 | -3.228 | 0.0139142   | 0.0854991  |
| 19554 | 10456289 |                                    |                           |                                |                                    | 0.768 | -2.322 | 0.0521929   | 0.206699   |
| 19555 | 10542275 | <a href="#">NM_007961</a>          | <a href="#">14011</a>     | ets variant gene 6 (TEL oncoge | <a href="#">Etv6</a>               | 0.768 | -5.364 | 0.000950698 | 0.0126584  |
| 19556 | 10578477 | <a href="#">NM_153535</a>          | <a href="#">212326</a>    | cDNA sequence BC035537         | <a href="#">BC035537</a>           | 0.768 | -5.053 | 0.00134913  | 0.0162541  |
| 19557 | 10445067 | <a href="#">BC027007</a>           | <a href="#">76416</a>     | RIKEN cDNA 1700022C21 gene     | <a href="#">1700022C21Rik</a>      | 0.767 | -4.09  | 0.00434469  | 0.0370182  |
| 19558 | 10456639 | <a href="#">NM_028948</a>          | <a href="#">74453</a>     | coiled-coil domain containing  | <a href="#">Ccdc11</a>             | 0.767 | -3.595 | 0.00837172  | 0.0597609  |
| 19559 | 10405563 | <a href="#">ENSMUST00000099476</a> | <a href="#">100038494</a> | predicted gene, ENSMUSG0000007 | <a href="#">ENSMUSG00000074885</a> | 0.767 | -2.11  | 0.0716762   | 0.251634   |
| 19560 | 10515277 | <a href="#">ENSMUST00000030469</a> | <a href="#">68075</a>     | RIKEN cDNA 1520402A15 gene     | <a href="#">1520402A15Rik</a>      | 0.767 | -2.879 | 0.022925    | 0.120261   |
| 19561 | 10394353 | <a href="#">NM_025323</a>          | <a href="#">66055</a>     | RIKEN cDNA 0610009D07 gene     | <a href="#">0610009D07Rik</a>      | 0.767 | -5.184 | 0.00116149  | 0.0146268  |
| 19562 | 10453717 | <a href="#">BC056351</a>           | <a href="#">19330</a>     | RAB18, member RAS oncogene fam | <a href="#">Rab18</a>              | 0.767 | -3.354 | 0.0116612   | 0.075402   |
| 19563 | 10578964 | <a href="#">BC016246</a>           | <a href="#">66282</a>     | RIKEN cDNA 1810029B16 gene     | <a href="#">1810029B16Rik</a>      | 0.767 | -4.612 | 0.00226611  | 0.0238263  |
| 19564 | 10486197 | <a href="#">NM_145530</a>          | <a href="#">228543</a>    | ras homolog gene family, membe | <a href="#">Rhov</a>               | 0.767 | -5.659 | 0.000690629 | 0.0101478  |
| 19565 | 10482687 | <a href="#">NM_182994</a>          | <a href="#">75423</a>     | ADP-ribosylation factor-like 5 | <a href="#">Arl5a</a>              | 0.767 | -3.887 | 0.005657    | 0.0451705  |
| 19566 | 10357676 | <a href="#">NM_008795</a>          | <a href="#">18557</a>     | PCTAIRE-motif protein kinase 3 | <a href="#">Pctk3</a>              | 0.767 | -3.082 | 0.0171155   | 0.0987437  |
| 19567 | 10357103 | <a href="#">NM_001081386</a>       | <a href="#">227485</a>    | cadherin 19, type 2            | <a href="#">Cdh19</a>              | 0.767 | -2.109 | 0.0717009   | 0.251634   |
| 19568 | 10356329 | <a href="#">AF357416</a>           | <a href="#">17975</a>     | nucleolin                      | <a href="#">Ncl</a>                | 0.767 | -1.781 | 0.116817    | 0.340359   |
| 19569 | 10585282 | <a href="#">ENSMUST00000050829</a> | <a href="#">69849</a>     | RIKEN cDNA 2010007H06 gene     | <a href="#">2010007H06Rik</a>      | 0.767 | -4.999 | 0.00143527  | 0.0168502  |
| 19570 | 10369867 | <a href="#">NM_009360</a>          | <a href="#">21780</a>     | transcription factor A, mitoch | <a href="#">Tfam</a>               | 0.766 | -3.85  | 0.00593916  | 0.0467005  |
| 19571 | 10546476 | <a href="#">NM_001099850</a>       | <a href="#">14924</a>     | membrane associated guanylate  | <a href="#">Maol1</a>              | 0.766 | -3.801 | 0.00633861  | 0.0488474  |

|       |          |                                    |                           |                                |                                    |       |        |             |            |
|-------|----------|------------------------------------|---------------------------|--------------------------------|------------------------------------|-------|--------|-------------|------------|
| 19571 | 10570770 | <a href="#">NM_001022020</a>       | <a href="#">17227</a>     | membrane associated guanylate  | <a href="#">Magt1</a>              | 0.766 | -3.301 | 0.00053601  | 0.0768727  |
| 19572 | 10555041 | <a href="#">NM_199035</a>          | <a href="#">381903</a>    | asparagine-linked glycosylatio | <a href="#">Alg8</a>               | 0.766 | -3.31  | 0.0123901   | 0.07853    |
| 19573 | 10443021 | <a href="#">NM_025272</a>          | <a href="#">11974</a>     | ATPase, H+ transporting, lysos | <a href="#">Atp6v0e</a>            | 0.766 | -2.984 | 0.0197009   | 0.108733   |
| 19574 | 10366391 | <a href="#">NM_001025581</a>       | <a href="#">268345</a>    | potassium voltage gated channe | <a href="#">Kcnc2</a>              | 0.766 | -3.514 | 0.00934878  | 0.0647463  |
| 19575 | 10463430 | <a href="#">NM_011976</a>          | <a href="#">26456</a>     | sema domain, immunoglobulin do | <a href="#">Sema4g</a>             | 0.766 | -5.082 | 0.00130522  | 0.0158881  |
| 19576 | 10395277 | <a href="#">NM_198710</a>          | <a href="#">19027</a>     | synaptophysin-like protein     | <a href="#">Sypl</a>               | 0.766 | -5.415 | 0.000898937 | 0.0121374  |
| 19577 | 10581159 | <a href="#">BC055880</a>           | <a href="#">68523</a>     | RIKEN cDNA 1110019N10 gene     | <a href="#">1110019N10Rik</a>      | 0.766 | -3.254 | 0.0134168   | 0.0833783  |
| 19578 | 10584941 | <a href="#">NM_011792</a>          | <a href="#">23821</a>     | beta-site APP cleaving enzyme  | <a href="#">Bace1</a>              | 0.765 | -4.26  | 0.00349874  | 0.0317517  |
| 19579 | 10479087 | <a href="#">NM_172675</a>          | <a href="#">228960</a>    | syntaxin 16                    | <a href="#">Stx16</a>              | 0.765 | -4.883 | 0.00164154  | 0.0186306  |
| 19580 | 10353167 | <a href="#">NM_028173</a>          | <a href="#">72265</a>     | translocating chain-associatin | <a href="#">Tram1</a>              | 0.765 | -3.825 | 0.00614481  | 0.0476442  |
| 19581 | 10604846 | <a href="#">XM_892078</a>          | <a href="#">627420</a>    | predicted gene, EG627420       | <a href="#">EG627420</a>           | 0.765 | -2.42  | 0.0450763   | 0.187765   |
| 19582 | 10385716 | <a href="#">BC024353</a>           | <a href="#">66050</a>     | RIKEN cDNA 0610009B22 gene     | <a href="#">0610009B22Rik</a>      | 0.765 | -3.742 | 0.00686338  | 0.051736   |
| 19583 | 10557535 | <a href="#">NM_144926</a>          | <a href="#">233878</a>    | seizure related 6 homolog like | <a href="#">Sez6l2</a>             | 0.765 | -4.126 | 0.00414842  | 0.0358163  |
| 19584 | 10362615 | <a href="#">NM_134000</a>          | <a href="#">103213</a>    | Traf3 interacting protein 2    | <a href="#">Traf3ip2</a>           | 0.765 | -4.628 | 0.00222304  | 0.0234785  |
| 19585 | 10527547 | <a href="#">NM_025652</a>          | <a href="#">66596</a>     | general transcription factor I | <a href="#">Gtf3a</a>              | 0.765 | -6.567 | 0.000276072 | 0.00540246 |
| 19586 | 10451784 | <a href="#">NM_001031811</a>       | <a href="#">211468</a>    | potassium voltage-gated channe | <a href="#">Kenh8</a>              | 0.764 | -2.197 | 0.0628987   | 0.232383   |
| 19587 | 10431140 | <a href="#">BC062953</a>           | <a href="#">72301</a>     | RIKEN cDNA 1810041L15 gene     | <a href="#">1810041L15Rik</a>      | 0.764 | -4.701 | 0.00203719  | 0.0219879  |
| 19588 | 10501358 | <a href="#">NM_011319</a>          | <a href="#">20226</a>     | seryl-aminoacyl-tRNA synthetas | <a href="#">Sars</a>               | 0.764 | -3.788 | 0.00645247  | 0.0494315  |
| 19589 | 10588701 | <a href="#">NM_178020</a>          | <a href="#">109685</a>    | hyaluronoglucosaminidase 3     | <a href="#">Hyal3</a>              | 0.764 | -5.685 | 0.000672004 | 0.00996413 |
| 19590 | 10548565 | <a href="#">NM_025564</a>          | <a href="#">66441</a>     | mago-nashi homolog B (Drosophi | <a href="#">Magohb</a>             | 0.764 | -5.008 | 0.00142063  | 0.0167856  |
| 19591 | 10511679 | <a href="#">NM_026172</a>          | <a href="#">67460</a>     | 2,4-dienoyl CoA reductase 1, m | <a href="#">Decr1</a>              | 0.764 | -3.884 | 0.00568457  | 0.0452369  |
| 19592 | 10372503 | <a href="#">NM_010195</a>          | <a href="#">14160</a>     | leucine rich repeat containing | <a href="#">Lgr5</a>               | 0.764 | -3.534 | 0.00908755  | 0.063394   |
| 19593 | 10483809 | <a href="#">NM_010902</a>          | <a href="#">18024</a>     | nuclear factor, erythroid deri | <a href="#">Nfe2l2</a>             | 0.764 | -3.092 | 0.0168747   | 0.0978602  |
| 19594 | 10588691 | <a href="#">NM_008317</a>          | <a href="#">15586</a>     | hyaluronoglucosaminidase 1     | <a href="#">Hyal1</a>              | 0.764 | -3.137 | 0.0158316   | 0.0936872  |
| 19595 | 10463355 | <a href="#">NM_009128</a>          | <a href="#">20250</a>     | stearoyl-Coenzyme A desaturase | <a href="#">Scd2</a>               | 0.764 | -4.977 | 0.00147226  | 0.0171324  |
| 19596 | 10362902 | <a href="#">XM_001477881</a>       | <a href="#">668192</a>    | predicted gene, EG668192       | <a href="#">EG668192</a>           | 0.764 | -2.33  | 0.0515857   | 0.205217   |
| 19597 | 10536405 | <a href="#">ENSMUST00000101672</a> | <a href="#">18231</a>     | neurexophilin 1                | <a href="#">Nxph1</a>              | 0.764 | -2.792 | 0.0260432   | 0.130766   |
| 19598 | 10409543 |                                    |                           |                                |                                    | 0.764 | -1.43  | 0.194557    | 0.454622   |
| 19599 | 10506643 | <a href="#">NM_029565</a>          | <a href="#">56374</a>     | transmembrane protein 59       | <a href="#">Tmem59</a>             | 0.764 | -5.136 | 0.00122626  | 0.0152338  |
| 19600 | 10531049 |                                    |                           |                                |                                    | 0.764 | -1.928 | 0.0939823   | 0.297613   |
| 19601 | 10350473 | <a href="#">NM_020025</a>          | <a href="#">26878</a>     | UDP-Gal:betaGlcNAc beta 1,3-ga | <a href="#">B3gal2</a>             | 0.763 | -2.964 | 0.0202758   | 0.110893   |
| 19602 | 10579335 | <a href="#">NM_023217</a>          | <a href="#">66522</a>     | pyroglutamyl-peptidase I       | <a href="#">Pgpep1</a>             | 0.763 | -4.362 | 0.00307908  | 0.0292078  |
| 19603 | 10593196 | <a href="#">ENSMUST00000098800</a> | <a href="#">100038460</a> | predicted gene, ENSMUSG0000007 | <a href="#">ENSMUSG00000074363</a> | 0.763 | -3.014 | 0.0188686   | 0.105433   |
| 19604 | 10450363 |                                    |                           |                                |                                    | 0.763 | -2.172 | 0.0653045   | 0.238356   |
| 19605 | 10529445 | <a href="#">NM_013587</a>          | <a href="#">16976</a>     | low density lipoprotein recept | <a href="#">Lrpap1</a>             | 0.763 | -4.99  | 0.0014492   | 0.0169479  |
| 19606 | 10353545 | <a href="#">BC028981</a>           | <a href="#">68002</a>     | RIKEN cDNA 1110058L19 gene     | <a href="#">1110058L19Rik</a>      | 0.763 | -2.793 | 0.0259939   | 0.130643   |
| 19607 | 10392096 |                                    |                           |                                |                                    | 0.763 | -2.133 | 0.0692027   | 0.246526   |
| 19608 | 10463997 | <a href="#">NM_011050</a>          | <a href="#">18569</a>     | programmed cell death 4        | <a href="#">Pcdcd4</a>             | 0.763 | -4.287 | 0.00338219  | 0.0310771  |
| 19609 | 10490768 | <a href="#">ENSMUST00000091375</a> | <a href="#">383815</a>    | predicted gene, EG383815       | <a href="#">EG383815</a>           | 0.763 | -2.775 | 0.026675    | 0.132803   |
| 19610 | 10524874 | <a href="#">NM_001033311</a>       | <a href="#">231668</a>    | cDNA sequence BC023744         | <a href="#">BC023744</a>           | 0.763 | -2.25  | 0.0580648   | 0.221132   |
| 19611 | 10527332 | <a href="#">NM_016789</a>          | <a href="#">53324</a>     | neuronal pentraxin 2           | <a href="#">Nptx2</a>              | 0.763 | -2.593 | 0.0348834   | 0.158618   |
| 19612 | 10423599 | <a href="#">NM_016762</a>          | <a href="#">17181</a>     | matrilin 2                     | <a href="#">Matn2</a>              | 0.763 | -2.636 | 0.0327354   | 0.152156   |
| 19613 | 10347774 | <a href="#">NM_001081210</a>       | <a href="#">69163</a>     | mitochondrial ribosomal protei | <a href="#">Mrpl44</a>             | 0.763 | -5.124 | 0.00124406  | 0.0154098  |
| 19614 | 10594928 | <a href="#">NM_018889</a>          | <a href="#">55981</a>     | phosphatidylinositol glycan an | <a href="#">Pigb</a>               | 0.763 | -6.144 | 0.000417947 | 0.00716699 |
| 19615 | 10354504 | <a href="#">XR_031113</a>          | <a href="#">546736</a>    | glyceraldehyde-3-phosphate deh | <a href="#">LOC546736</a>          | 0.762 | -1.465 | 0.185037    | 0.442633   |
| 19616 | 10544689 | <a href="#">BC055110</a>           | <a href="#">70821</a>     | RIKEN cDNA 4921507P07 gene     | <a href="#">4921507P07Rik</a>      | 0.762 | -2.929 | 0.0213225   | 0.114311   |
| 19617 | 10589596 | <a href="#">NM_028312</a>          | <a href="#">72654</a>     | coiled-coil domain containing  | <a href="#">Ccdc12</a>             | 0.762 | -4.195 | 0.00379855  | 0.0336898  |
| 19618 | 10567289 | <a href="#">NM_138649</a>          | <a href="#">110058</a>    | synaptotagmin XVII             | <a href="#">Syt17</a>              | 0.762 | -2.73  | 0.0284907   | 0.138514   |
| 19619 | 10553533 | <a href="#">XM_904670</a>          | <a href="#">620782</a>    | predicted gene, EG620782       | <a href="#">EG620782</a>           | 0.762 | -2.236 | 0.0593703   | 0.224406   |
| 19620 | 10394990 | <a href="#">NM_026037</a>          | <a href="#">67216</a>     | membrane bound O-acyltransfera | <a href="#">Mboat2</a>             | 0.762 | -4.12  | 0.00417997  | 0.0359859  |
| 19621 | 10584334 | <a href="#">NM_011734</a>          | <a href="#">22619</a>     | sialic acid acetylerase        | <a href="#">Siae</a>               | 0.762 | -2.792 | 0.0260339   | 0.130751   |
| 19622 | 10500051 | <a href="#">BC024574</a>           | <a href="#">68618</a>     | RIKEN cDNA 1110019N10 gene     | <a href="#">1110019N10Rik</a>      | 0.762 | -3.62  | 0.0080006   | 0.0584526  |

|       |          |                                    |                           |                                |                               |       |        |             |            |
|-------|----------|------------------------------------|---------------------------|--------------------------------|-------------------------------|-------|--------|-------------|------------|
| 19622 | 10399931 | <a href="#">BC024374</a>           | <a href="#">68018</a>     | RIKEN cDNA 1110012L19 gene     | <a href="#">1110012L19Rik</a> | 0.762 | -3.02  | 0.00808900  | 0.0384350  |
| 19623 | 10470555 | <a href="#">NM_139197</a>          | <a href="#">227671</a>    | globoside alpha-1,3-N-acetylga | <a href="#">Gbgf1</a>         | 0.762 | -2.69  | 0.0302147   | 0.144448   |
| 19624 | 10355246 | <a href="#">NM_007381</a>          | <a href="#">11363</a>     | acyl-Coenzyme A dehydrogenase, | <a href="#">Acadl</a>         | 0.762 | -6.432 | 0.000314479 | 0.00587397 |
| 19625 | 10489195 | <a href="#">BC053067</a>           | <a href="#">75425</a>     | RIKEN cDNA 2610036D13 gene     | <a href="#">2610036D13Rik</a> | 0.762 | -4.322 | 0.00323941  | 0.0301736  |
| 19626 | 10589889 | <a href="#">NM_009752</a>          | <a href="#">12091</a>     | galactosidase, beta 1          | <a href="#">Glb1</a>          | 0.762 | -3.249 | 0.013497    | 0.0836895  |
| 19627 | 10375313 | <a href="#">NM_001045530</a>       | <a href="#">380694</a>    | cyclin J-like                  | <a href="#">Cenjl</a>         | 0.762 | -2.933 | 0.0212049   | 0.114027   |
| 19628 | 10433492 | <a href="#">BC018510</a>           | <a href="#">75329</a>     | activating transcription facto | <a href="#">Atf7ip2</a>       | 0.761 | -1.957 | 0.0899756   | 0.289452   |
| 19629 | 10428222 | <a href="#">NM_134094</a>          | <a href="#">52589</a>     | neurocalcin delta              | <a href="#">Ncald</a>         | 0.761 | -4.358 | 0.00309403  | 0.0293364  |
| 19630 | 10462628 |                                    |                           |                                |                               | 0.761 | -1.223 | 0.259947    | 0.534194   |
| 19631 | 10558840 | <a href="#">NM_025886</a>          | <a href="#">66985</a>     | Ras association (RalGDS/AF-6)  | <a href="#">Rassf7</a>        | 0.761 | -5.435 | 0.000878966 | 0.0119594  |
| 19632 | 10472162 | <a href="#">NM_010274</a>          | <a href="#">14571</a>     | glycerol phosphate dehydrogena | <a href="#">Gpd2</a>          | 0.761 | -5.265 | 0.00106076  | 0.0136928  |
| 19633 | 10577517 | <a href="#">NM_181325</a>          | <a href="#">18408</a>     | solute carrier family 25 (mito | <a href="#">Slc25a15</a>      | 0.761 | -3.826 | 0.00613272  | 0.0476028  |
| 19634 | 10605559 |                                    |                           |                                |                               | 0.761 | -1.359 | 0.215169    | 0.482248   |
| 19635 | 10537394 | <a href="#">BC059710</a>           | <a href="#">66117</a>     | RIKEN cDNA 1110001J03 gene     | <a href="#">1110001J03Rik</a> | 0.76  | -5.359 | 0.000955816 | 0.0127026  |
| 19636 | 10347073 | <a href="#">ENSMUST00000050986</a> | <a href="#">329178</a>    | cDNA sequence BC042720         | <a href="#">BC042720</a>      | 0.76  | -4.328 | 0.00321346  | 0.0300378  |
| 19637 | 10506786 | <a href="#">NM_175472</a>          | <a href="#">230594</a>    | zinc finger, CCHC domain conta | <a href="#">Zcchc11</a>       | 0.76  | -5.09  | 0.00129342  | 0.0158118  |
| 19638 | 10459844 | <a href="#">NM_146089</a>          | <a href="#">225745</a>    | coiled-coil domain containing  | <a href="#">Ccdc5</a>         | 0.76  | -3.529 | 0.00915692  | 0.0637517  |
| 19639 | 10494023 | <a href="#">NM_011281</a>          | <a href="#">19885</a>     | RAR-related orphan receptor ga | <a href="#">Rorc</a>          | 0.76  | -3.077 | 0.0172425   | 0.0992784  |
| 19640 | 10588043 | <a href="#">NM_009034</a>          | <a href="#">19660</a>     | retinol binding protein 2, cel | <a href="#">Rbp2</a>          | 0.76  | -6.365 | 0.000335765 | 0.00611645 |
| 19641 | 10382492 | <a href="#">NM_027132</a>          | <a href="#">69602</a>     | otopettrin 3                   | <a href="#">Otop3</a>         | 0.76  | -2.74  | 0.0280897   | 0.137515   |
| 19642 | 10596347 | <a href="#">NM_175025</a>          | <a href="#">235574</a>    | ATPase, Ca++-sequestering      | <a href="#">Atp2c1</a>        | 0.76  | -5.291 | 0.0010305   | 0.013395   |
| 19643 | 10415791 | <a href="#">NM_026001</a>          | <a href="#">67153</a>     | ribonuclease H2, subunit B     | <a href="#">Rnaseh2b</a>      | 0.76  | -4.237 | 0.00360472  | 0.0325163  |
| 19644 | 10496748 | <a href="#">ENSMUST00000039517</a> | <a href="#">214804</a>    | synapse defective 1, Rho GTPas | <a href="#">Syde2</a>         | 0.76  | -2.906 | 0.0220389   | 0.116877   |
| 19645 | 10570771 | <a href="#">NM_027338</a>          | <a href="#">70160</a>     | vacuolar protein sorting 36 (y | <a href="#">Vps36</a>         | 0.76  | -3.618 | 0.00810579  | 0.0585345  |
| 19646 | 10556208 | <a href="#">NM_020616</a>          | <a href="#">57373</a>     | RIKEN cDNA D930014E17 gene     | <a href="#">D930014E17Rik</a> | 0.76  | -4.021 | 0.00475237  | 0.0397482  |
| 19647 | 10530832 | <a href="#">BC017154</a>           | <a href="#">56412</a>     | RIKEN cDNA 2610024G14 gene     | <a href="#">2610024G14Rik</a> | 0.76  | -5.09  | 0.00129338  | 0.0158118  |
| 19648 | 10479672 | <a href="#">NM_009326</a>          | <a href="#">21400</a>     | transcription elongation facto | <a href="#">Tcea2</a>         | 0.76  | -3.574 | 0.00860438  | 0.0610135  |
| 19649 | 10420736 | <a href="#">NM_201610</a>          | <a href="#">382913</a>    | nei like 2 (E. coli)           | <a href="#">Neil2</a>         | 0.76  | -3     | 0.0192545   | 0.106939   |
| 19650 | 10595046 | <a href="#">XR_034893</a>          | <a href="#">100048639</a> | similar to Glyceraldehyde-3-ph | <a href="#">LOC100048639</a>  | 0.76  | -2.017 | 0.0823236   | 0.274433   |
| 19651 | 10430365 | <a href="#">NM_009218</a>          | <a href="#">20607</a>     | somatostatin receptor 3        | <a href="#">Sstr3</a>         | 0.76  | -2.942 | 0.0209452   | 0.113309   |
| 19652 | 10509514 | <a href="#">NM_001099631</a>       | <a href="#">230863</a>    | SH2 domain containing 5        | <a href="#">Sh2d5</a>         | 0.759 | -3.051 | 0.0178802   | 0.101492   |
| 19653 | 10567134 | <a href="#">NM_172743</a>          | <a href="#">233765</a>    | pleckstrin homology domain con | <a href="#">Plekha7</a>       | 0.759 | -3.545 | 0.00895899  | 0.062808   |
| 19654 | 10587604 | <a href="#">NM_027100</a>          | <a href="#">69519</a>     | RWD domain containing 2A       | <a href="#">Rwdd2a</a>        | 0.759 | -3.452 | 0.0101763   | 0.0687874  |
| 19655 | 10538290 | <a href="#">NM_028035</a>          | <a href="#">71982</a>     | sorting nexin 10               | <a href="#">Snx10</a>         | 0.759 | -3.835 | 0.00605934  | 0.0472588  |
| 19656 | 10433988 | <a href="#">NM_008223</a>          | <a href="#">15160</a>     | serine (or cysteine) peptidase | <a href="#">Serpind1</a>      | 0.759 | -2.615 | 0.0337837   | 0.155173   |
| 19657 | 10392894 | <a href="#">NM_178035</a>          | <a href="#">328035</a>    | fatty acid desaturase domain f | <a href="#">Fads6</a>         | 0.758 | -3.457 | 0.010103    | 0.0685504  |
| 19658 | 10369806 | <a href="#">BC087900</a>           | <a href="#">73287</a>     | RIKEN cDNA 1700040L02 gene     | <a href="#">1700040L02Rik</a> | 0.758 | -3.807 | 0.00629344  | 0.0485716  |
| 19659 | 10524052 | <a href="#">NM_054071</a>          | <a href="#">116701</a>    | fibroblast growth factor recep | <a href="#">Fgfr11</a>        | 0.758 | -5.443 | 0.000871826 | 0.0119005  |
| 19660 | 10373834 | <a href="#">NM_146013</a>          | <a href="#">103655</a>    | SEC14-like 4 (S. cerevisiae)   | <a href="#">Sec14l4</a>       | 0.758 | -3.897 | 0.00558553  | 0.044769   |
| 19661 | 10357950 | <a href="#">NM_001081307</a>       | <a href="#">329251</a>    | protein phosphatase 1, regulat | <a href="#">Ppp1r12b</a>      | 0.758 | -2.396 | 0.0466987   | 0.191982   |
| 19662 | 10547531 | <a href="#">NM_007544</a>          | <a href="#">12122</a>     | BH3 interacting domain death a | <a href="#">Bid</a>           | 0.758 | -4.319 | 0.00324897  | 0.0302227  |
| 19663 | 10606445 | <a href="#">NM_025949</a>          | <a href="#">67071</a>     | ribosomal protein S6 kinase po | <a href="#">Rps6ka6</a>       | 0.758 | -5.059 | 0.00133899  | 0.0161873  |
| 19664 | 10449415 | <a href="#">ENSMUST00000056274</a> | <a href="#">319712</a>    | RIKEN cDNA C230013L11 gene     | <a href="#">C230013L11Rik</a> | 0.757 | -2.771 | 0.026848    | 0.133319   |
| 19665 | 10430861 | <a href="#">NM_001104531</a>       | <a href="#">545123</a>    | cytochrome P450, family 2, sub | <a href="#">Cyp2d11</a>       | 0.757 | -1.821 | 0.110234    | 0.328467   |
| 19666 | 10392943 | <a href="#">NM_008258</a>          | <a href="#">15374</a>     | hematological and neurological | <a href="#">Hnl</a>           | 0.757 | -4.121 | 0.00417656  | 0.0359859  |
| 19667 | 10582180 | <a href="#">NM_001033980</a>       | <a href="#">436062</a>    | RIKEN cDNA 1700120B06 gene     | <a href="#">1700120B06Rik</a> | 0.757 | -2.639 | 0.0325906   | 0.151717   |
| 19668 | 10404737 | <a href="#">XM_001472337</a>       | <a href="#">637277</a>    | similar to 145 kDa nucleolar p | <a href="#">LOC637277</a>     | 0.757 | -5.117 | 0.00125312  | 0.0154766  |
| 19669 | 10409434 | <a href="#">NM_025828</a>          | <a href="#">66890</a>     | lectin, mannose-binding 2      | <a href="#">Lman2</a>         | 0.756 | -5.031 | 0.00138331  | 0.0165621  |
| 19670 | 10366640 | <a href="#">BC096681</a>           | <a href="#">66225</a>     | RIKEN cDNA 1190005P17 gene     | <a href="#">1190005P17Rik</a> | 0.756 | -2.616 | 0.0337381   | 0.155049   |
| 19671 | 10476189 | <a href="#">NM_207207</a>          | <a href="#">99045</a>     | mitochondrial ribosomal protei | <a href="#">Mrps26</a>        | 0.756 | -4.519 | 0.002537    | 0.0256417  |
| 19672 | 10538087 | <a href="#">NM_177736</a>          | <a href="#">243371</a>    | leucine rich repeat containing | <a href="#">Lrrc61</a>        | 0.756 | -2.686 | 0.0304291   | 0.145105   |
| 19673 | 10572097 | <a href="#">BC116682</a>           | <a href="#">72281</a>     | SH2 domain containing 4A       | <a href="#">Sh2d4a</a>        | 0.756 | -4.418 | 0.00287292  | 0.0280221  |
| 19674 | 10460468 | <a href="#">NM_019861</a>          | <a href="#">56464</a>     | cathepsin F                    | <a href="#">Ctsf</a>          | 0.756 | -2.263 | 0.0570194   | 0.218378   |

|       |          |                                    |                        |                                |                                    |       |        |             |            |
|-------|----------|------------------------------------|------------------------|--------------------------------|------------------------------------|-------|--------|-------------|------------|
| 19675 | 10506870 | <a href="#">NM_025334</a>          | <a href="#">66073</a>  | thioredoxin domain containing  | <a href="#">Txndc12</a>            | 0.756 | -3.184 | 0.0148027   | 0.0893485  |
| 19676 | 10441954 | <a href="#">AK019108</a>           | <a href="#">381062</a> | RIKEN cDNA 2210404J11 gene     | <a href="#">2210404J11Rik</a>      | 0.756 | -2.276 | 0.0558601   | 0.215766   |
| 19677 | 10347364 | <a href="#">NM_009509</a>          | <a href="#">22349</a>  | villin 1                       | <a href="#">Vill1</a>              | 0.756 | -3.341 | 0.0118756   | 0.0762783  |
| 19678 | 10566144 | <a href="#">NM_009277</a>          | <a href="#">20821</a>  | tripartite motif-containing 21 | <a href="#">Trim21</a>             | 0.756 | -5.897 | 0.000537973 | 0.008531   |
| 19679 | 10567343 | <a href="#">NM_023197</a>          | <a href="#">66356</a>  | RIKEN cDNA 2310008H09 gene     | <a href="#">2310008H09Rik</a>      | 0.756 | -4.568 | 0.00239027  | 0.024654   |
| 19680 | 10488033 | <a href="#">NM_172858</a>          | <a href="#">241656</a> | p21 (CDKN1A)-activated kinase  | <a href="#">Pak7</a>               | 0.756 | -4.185 | 0.00384787  | 0.0340273  |
| 19681 | 10469581 | <a href="#">NM_001081006</a>       | <a href="#">208618</a> | enhancer trap locus 4          | <a href="#">Etl4</a>               | 0.756 | -3.489 | 0.00966864  | 0.0664393  |
| 19682 | 10591668 | <a href="#">NM_023622</a>          | <a href="#">71746</a>  | ral guanine nucleotide dissoci | <a href="#">Rgl3</a>               | 0.756 | -5.244 | 0.00108592  | 0.0139228  |
| 19683 | 10490833 | <a href="#">XM_908050</a>          | <a href="#">621504</a> | similar to peptidylprolyl isom | <a href="#">LOC621504</a>          | 0.756 | -1.977 | 0.0873831   | 0.284469   |
| 19684 | 10466865 | <a href="#">NM_011265</a>          | <a href="#">19726</a>  | regulatory factor X, 3 (influe | <a href="#">Rfx3</a>               | 0.755 | -4.784 | 0.00184464  | 0.0203352  |
| 19685 | 10539310 | <a href="#">NM_197992</a>          | <a href="#">69837</a>  | polycomb group ring finger 1   | <a href="#">Pcgf1</a>              | 0.755 | -3.466 | 0.00998774  | 0.0680694  |
| 19686 | 10344807 | <a href="#">NM_026493</a>          | <a href="#">211660</a> | centrosome and spindle pole as | <a href="#">Cspp1</a>              | 0.755 | -3.86  | 0.00586112  | 0.0462423  |
| 19687 | 10454881 | <a href="#">BC028765</a>           | <a href="#">66060</a>  | RIKEN cDNA 0610010012 gene     | <a href="#">0610010012Rik</a>      | 0.755 | -5.643 | 0.000702026 | 0.0102795  |
| 19688 | 10498166 | <a href="#">AY512944</a>           | <a href="#">791313</a> | predicted gene, ENSMUSG0000006 | <a href="#">ENSMUSG00000069012</a> | 0.755 | -3.156 | 0.0153982   | 0.092102   |
| 19689 | 10479749 | <a href="#">NM_001013376</a>       | <a href="#">227522</a> | ribonuclease P/MRP 38 subunit  | <a href="#">Rpp38</a>              | 0.755 | -3.319 | 0.0122418   | 0.0778362  |
| 19690 | 10551534 | <a href="#">NM_207238</a>          | <a href="#">233040</a> | F-box protein 27               | <a href="#">Fbxo27</a>             | 0.755 | -4.235 | 0.00361374  | 0.0325838  |
| 19691 | 10542287 | <a href="#">NM_025778</a>          | <a href="#">66813</a>  | Bcl2-like 14 (apoptosis facili | <a href="#">Bcl2l14</a>            | 0.755 | -3.228 | 0.0139112   | 0.0854991  |
| 19692 | 10362314 | <a href="#">NM_008983</a>          | <a href="#">19272</a>  | protein tyrosine phosphatase,  | <a href="#">Ptrk</a>               | 0.755 | -5.047 | 0.00135851  | 0.0163206  |
| 19693 | 10369993 | <a href="#">NM_133994</a>          | <a href="#">103140</a> | glutathione S-transferase, the | <a href="#">Gstt3</a>              | 0.755 | -3.074 | 0.0173255   | 0.0994394  |
| 19694 | 10533316 | <a href="#">NM_026129</a>          | <a href="#">67397</a>  | endoplasmic reticulum protein  | <a href="#">Erp29</a>              | 0.755 | -6.851 | 0.000211208 | 0.00458971 |
| 19695 | 10603387 | <a href="#">NM_010413</a>          | <a href="#">15185</a>  | histone deacetylase 6          | <a href="#">Hdac6</a>              | 0.755 | -4.337 | 0.00317829  | 0.0298542  |
| 19696 | 10578952 | <a href="#">AK131860</a>           | <a href="#">407795</a> | cDNA sequence BC030870         | <a href="#">BC030870</a>           | 0.755 | -2.606 | 0.0342155   | 0.156591   |
| 19697 | 10474048 | <a href="#">NM_030725</a>          | <a href="#">80976</a>  | synaptotagmin XIII             | <a href="#">Syt13</a>              | 0.755 | -4.875 | 0.00165743  | 0.0187471  |
| 19698 | 10411167 |                                    |                        |                                |                                    | 0.755 | -2.956 | 0.0205254   | 0.112026   |
| 19699 | 10445972 | <a href="#">NM_145490</a>          | <a href="#">224893</a> | cDNA sequence BC011426         | <a href="#">BC011426</a>           | 0.755 | -1.77  | 0.11885     | 0.344334   |
| 19700 | 10590073 | <a href="#">NM_011700</a>          | <a href="#">22351</a>  | villin-like                    | <a href="#">Vill</a>               | 0.755 | -3.468 | 0.00994829  | 0.0678975  |
| 19701 | 10584549 | <a href="#">NM_178227</a>          | <a href="#">235281</a> | sodium channel, voltage-gated, | <a href="#">Scn3b</a>              | 0.755 | -2.101 | 0.0725968   | 0.253885   |
| 19702 | 10398352 |                                    |                        |                                |                                    | 0.754 | -1.631 | 0.145614    | 0.387145   |
| 19703 | 10601888 | <a href="#">NM_011123</a>          | <a href="#">18823</a>  | proteolipid protein (myelin) 1 | <a href="#">Plp1</a>               | 0.754 | -2.782 | 0.0263978   | 0.131858   |
| 19704 | 10483326 | <a href="#">NM_018852</a>          | <a href="#">20274</a>  | sodium channel, voltage-gated, | <a href="#">Scn9a</a>              | 0.754 | -2.477 | 0.0414264   | 0.177599   |
| 19705 | 10524266 | <a href="#">NM_016681</a>          | <a href="#">50883</a>  | CHK2 checkpoint homolog (S. po | <a href="#">Chek2</a>              | 0.754 | -5.794 | 0.000599016 | 0.00921398 |
| 19706 | 10479852 | <a href="#">NM_177343</a>          | <a href="#">227541</a> | calcium/calmodulin-dependent p | <a href="#">Camk1d</a>             | 0.754 | -3.075 | 0.0172951   | 0.0993717  |
| 19707 | 10499854 | <a href="#">NM_011309</a>          | <a href="#">20193</a>  | S100 calcium binding protein A | <a href="#">S100a1</a>             | 0.754 | -2.933 | 0.0212155   | 0.114027   |
| 19708 | 10365658 | <a href="#">NM_029166</a>          | <a href="#">75089</a>  | UHRF1 (ICBP90) binding protein | <a href="#">Uhrf1bp11</a>          | 0.754 | -5.37  | 0.000944029 | 0.0126089  |
| 19709 | 10512851 | <a href="#">NM_029572</a>          | <a href="#">76299</a>  | thioredoxin domain containing  | <a href="#">Txndc4</a>             | 0.754 | -3.23  | 0.0138817   | 0.0854233  |
| 19710 | 10571724 | <a href="#">ENSMUST00000074466</a> | <a href="#">676582</a> | predicted gene, ENSMUSG0000006 | <a href="#">ENSMUSG00000060559</a> | 0.754 | -1.959 | 0.0897231   | 0.289125   |
| 19711 | 10586180 | <a href="#">BC028529</a>           | <a href="#">330959</a> | small nuclear RNA activating c | <a href="#">Snapc5</a>             | 0.754 | -3.967 | 0.00509431  | 0.0418307  |
| 19712 | 10580183 | <a href="#">NM_010499</a>          | <a href="#">15936</a>  | immediate early response 2     | <a href="#">Ier2</a>               | 0.754 | -4.296 | 0.00334315  | 0.0308275  |
| 19713 | 10605431 | <a href="#">NM_175122</a>          | <a href="#">67790</a>  | RAB39B, member RAS oncogene fa | <a href="#">Rab39b</a>             | 0.754 | -4.121 | 0.00417855  | 0.0359859  |
| 19714 | 10406877 | <a href="#">NM_011353</a>          | <a href="#">20365</a>  | small EDRK-rich factor 1       | <a href="#">Serf1</a>              | 0.754 | -5.274 | 0.00105033  | 0.0135996  |
| 19715 | 10584535 | <a href="#">XR_034073</a>          | <a href="#">235279</a> | similar to rRNA-processing pro | <a href="#">LOC235279</a>          | 0.753 | -4.303 | 0.00331718  | 0.0306428  |
| 19716 | 10567964 | <a href="#">NM_009907</a>          | <a href="#">12752</a>  | ceroid lipofuscinosis, neurona | <a href="#">Cln3</a>               | 0.753 | -6.143 | 0.000418465 | 0.00716699 |
| 19717 | 10442887 | <a href="#">BC132383</a>           | <a href="#">214931</a> | F-box and leucine-rich repeat  | <a href="#">Fbxl16</a>             | 0.753 | -2.786 | 0.0262477   | 0.131326   |
| 19718 | 10354649 | <a href="#">ENSMUST00000094950</a> | <a href="#">241062</a> | post-GPI attachment to protein | <a href="#">Pgap1</a>              | 0.753 | -5.025 | 0.0013918   | 0.0166183  |
| 19719 | 10441456 | <a href="#">NM_011523</a>          | <a href="#">20975</a>  | synaptojanin 2                 | <a href="#">Synj2</a>              | 0.753 | -3.517 | 0.00931179  | 0.0645748  |
| 19720 | 10483381 | <a href="#">NM_016856</a>          | <a href="#">53416</a>  | serine/threonine kinase 39, S1 | <a href="#">Srk39</a>              | 0.752 | -4.872 | 0.00166392  | 0.0187836  |
| 19721 | 10450640 | <a href="#">NM_025878</a>          | <a href="#">60979</a>  | mitochondrial ribosomal protei | <a href="#">MRps18b</a>            | 0.752 | -6.864 | 0.000208726 | 0.0045979  |
| 19722 | 10376444 | <a href="#">NM_030082</a>          | <a href="#">78303</a>  | histone cluster 3, H2ba        | <a href="#">Hist3h2ba</a>          | 0.752 | -4.486 | 0.00264306  | 0.0264606  |
| 19723 | 10600765 | <a href="#">NM_211138</a>          | <a href="#">236899</a> | phosphate cytidyltransferase   | <a href="#">Pcvt1b</a>             | 0.752 | -5.176 | 0.00117227  | 0.0147188  |
| 19724 | 10565910 | <a href="#">NM_013746</a>          | <a href="#">27276</a>  | pleckstrin homology domain con | <a href="#">Plekhl1</a>            | 0.752 | -3.243 | 0.0136265   | 0.0842945  |
| 19725 | 10365830 |                                    |                        |                                |                                    | 0.752 | -4.294 | 0.00335248  | 0.0308867  |

|       |          |                                    |                           |                                   |                                    |       |        |             |            |
|-------|----------|------------------------------------|---------------------------|-----------------------------------|------------------------------------|-------|--------|-------------|------------|
| 19726 | 10499132 | <a href="#">NM_011839</a>          | <a href="#">23937</a>     | mab-21-like 2 (C. elegans)        | <a href="#">Mab2112</a>            | 0.752 | -4.499 | 0.00259958  | 0.0261175  |
| 19727 | 10415952 |                                    |                           |                                   |                                    | 0.752 | -2.059 | 0.0773388   | 0.264006   |
| 19728 | 10556581 | <a href="#">ENSMUST00000098096</a> | <a href="#">100037281</a> | predicted gene,<br>ENSMUSG0000007 | <a href="#">ENSMUSG00000073861</a> | 0.752 | -2.427 | 0.0446157   | 0.186877   |
| 19729 | 10405253 | <a href="#">NM_009946</a>          | <a href="#">12890</a>     | complexin 2                       | <a href="#">Cplx2</a>              | 0.751 | -3.151 | 0.0155162   | 0.0924676  |
| 19730 | 10546346 | <a href="#">NM_133928</a>          | <a href="#">72170</a>     | coiled-coil-helix-coiled-coil-    | <a href="#">Chchd4</a>             | 0.751 | -5.029 | 0.0013855   | 0.0165789  |
| 19731 | 10407051 | <a href="#">XR_031811</a>          | <a href="#">100040366</a> | similar to Cytochrome c           | <a href="#">LOC100040366</a>       | 0.751 | -5.501 | 0.000817931 | 0.0114154  |
| 19732 | 10484584 |                                    |                           |                                   |                                    | 0.751 | -2.008 | 0.083359    | 0.276517   |
| 19733 | 10573128 | <a href="#">NM_001111304</a>       | <a href="#">71310</a>     | TBC1 domain family, member 9      | <a href="#">Tbc1d9</a>             | 0.751 | -5.69  | 0.000668142 | 0.00992775 |
| 19734 | 10528340 | <a href="#">NM_009584</a>          | <a href="#">22791</a>     | DnaJ (Hsp40) homolog, subfamil    | <a href="#">Dnajc2</a>             | 0.751 | -5.698 | 0.00066275  | 0.0098615  |
| 19735 | 10505982 | <a href="#">NM_029347</a>          | <a href="#">75578</a>     | FGGY carbohydrate kinase<br>domai | <a href="#">Fggy</a>               | 0.751 | -4.123 | 0.00416801  | 0.0359268  |
| 19736 | 10452257 | <a href="#">NM_025877</a>          | <a href="#">66972</a>     | solute carrier family 25 (mito    | <a href="#">Slc25a23</a>           | 0.751 | -4.451 | 0.00275684  | 0.0272896  |
| 19737 | 10441815 | <a href="#">NM_013671</a>          | <a href="#">20656</a>     | superoxide dismutase 2, mitoch    | <a href="#">Sod2</a>               | 0.751 | -5.941 | 0.000514067 | 0.00824067 |
| 19738 | 10468929 | <a href="#">NM_008708</a>          | <a href="#">18108</a>     | N-myristoyltransferase 2          | <a href="#">Nmt2</a>               | 0.751 | -3.426 | 0.010553    | 0.0705216  |
| 19739 | 10503186 | <a href="#">NM_001081417</a>       | <a href="#">320790</a>    | chromodomain helicase DNA<br>bind | <a href="#">Chd7</a>               | 0.75  | -3.053 | 0.0178495   | 0.101427   |
| 19740 | 10348637 | <a href="#">NM_146277</a>          | <a href="#">258274</a>    | olfactory receptor 1412           | <a href="#">Olf1412</a>            | 0.75  | -1.811 | 0.11188     | 0.331046   |
| 19741 | 10366737 | <a href="#">XR_031069</a>          | <a href="#">674596</a>    | similar to 60S ribosomal prote    | <a href="#">LOC674596</a>          | 0.75  | -2.638 | 0.032641    | 0.151851   |
| 19742 | 10431874 | <a href="#">NM_134086</a>          | <a href="#">105727</a>    | solute carrier family 38, memb    | <a href="#">Slc38a1</a>            | 0.75  | -6.624 | 0.000261312 | 0.0052421  |
| 19743 | 10398392 |                                    |                           |                                   |                                    | 0.75  | -1.883 | 0.100481    | 0.31011    |
| 19744 | 10386070 | <a href="#">NM_009720</a>          | <a href="#">11927</a>     | ATX1 (antioxidant protein 1) h    | <a href="#">Atox1</a>              | 0.75  | -6.008 | 0.00048     | 0.00785536 |
| 19745 | 10344821 | <a href="#">NM_026493</a>          | <a href="#">211660</a>    | centrosome and spindle pole as    | <a href="#">Cspp1</a>              | 0.75  | -3.788 | 0.00645675  | 0.0494464  |
| 19746 | 10473494 | <a href="#">NM_001011872</a>       | <a href="#">258216</a>    | olfactory receptor 1034           | <a href="#">Olf1034</a>            | 0.75  | -3.352 | 0.0116938   | 0.0755041  |
| 19747 | 10594747 | <a href="#">AK147236</a>           | <a href="#">100038475</a> | predicted gene,<br>ENSMUSG0000007 | <a href="#">ENSMUSG00000074230</a> | 0.75  | -2.332 | 0.0514425   | 0.204879   |
| 19748 | 10412755 | <a href="#">XR_033275</a>          | <a href="#">667125</a>    | similar to Casein kinase 2, al    | <a href="#">LOC667125</a>          | 0.75  | -1.964 | 0.0891277   | 0.287844   |
| 19749 | 10431210 | <a href="#">NM_009528</a>          | <a href="#">22422</a>     | wingless-related MMTV integrat    | <a href="#">Wnt7b</a>              | 0.75  | -4.407 | 0.00291196  | 0.0282692  |
| 19750 | 10382189 | <a href="#">NM_013475</a>          | <a href="#">11818</a>     | apolipoprotein H                  | <a href="#">ApoH</a>               | 0.75  | -2.911 | 0.0218883   | 0.116371   |
| 19751 | 10585972 |                                    |                           |                                   |                                    | 0.75  | -2.513 | 0.0392658   | 0.171927   |
| 19752 | 10603878 | <a href="#">NM_013840</a>          | <a href="#">22294</a>     | ubiquitously expressed transcr    | <a href="#">Uxt</a>                | 0.75  | -2.941 | 0.0209767   | 0.11338    |
| 19753 | 10460423 | <a href="#">NM_021287</a>          | <a href="#">20743</a>     | spectrin beta 3                   | <a href="#">Spnb3</a>              | 0.749 | -4.68  | 0.00208798  | 0.0224558  |
| 19754 | 10514650 | <a href="#">NM_026348</a>          | <a href="#">67733</a>     | integrin beta 3 binding protei    | <a href="#">Itgb3bp</a>            | 0.749 | -4.153 | 0.00400706  | 0.0350414  |
| 19755 | 10383168 | <a href="#">ENSMUST00000093902</a> | <a href="#">672511</a>    | hypothetical LOC672511            | <a href="#">LOC672511</a>          | 0.749 | -3.583 | 0.00850226  | 0.0604478  |
| 19756 | 10398420 |                                    |                           |                                   |                                    | 0.749 | -0.584 | 0.576929    | 0.79771    |
| 19757 | 10430748 | <a href="#">NM_011241</a>          | <a href="#">19387</a>     | RAN GTPase activating protein     | <a href="#">Rangap1</a>            | 0.749 | -4.434 | 0.00281732  | 0.0276552  |
| 19758 | 10437778 | <a href="#">NM_028761</a>          | <a href="#">74108</a>     | poly(A)-specific ribonuclease     | <a href="#">Parn</a>               | 0.749 | -3.842 | 0.00600922  | 0.0469545  |
| 19759 | 10488046 |                                    |                           |                                   |                                    | 0.749 | -2.749 | 0.0277324   | 0.136334   |
| 19760 | 10570278 |                                    |                           |                                   |                                    | 0.749 | -3.157 | 0.0153738   | 0.09206    |
| 19761 | 10513592 | <a href="#">NM_023597</a>          | <a href="#">71354</a>     | WD repeat domain 31               | <a href="#">Wdr31</a>              | 0.748 | -4.09  | 0.0043454   | 0.0370182  |
| 19762 | 10433885 | <a href="#">NM_007679</a>          | <a href="#">12609</a>     | CCAAT/enhancer binding<br>protein | <a href="#">Cebpd</a>              | 0.748 | -2.226 | 0.0602528   | 0.226406   |
| 19763 | 10397332 | <a href="#">NM_145445</a>          | <a href="#">217715</a>    | eukaryotic translation initiat    | <a href="#">Eif2b2</a>             | 0.748 | -6.633 | 0.000259091 | 0.00521239 |
| 19764 | 10563068 | <a href="#">NM_022999</a>          | <a href="#">65116</a>     | proline-rich Gla (G-carboxyglu    | <a href="#">Prrg2</a>              | 0.748 | -5.163 | 0.00119037  | 0.014893   |
| 19765 | 10396694 | <a href="#">NM_206534</a>          | <a href="#">211151</a>    | churchill domain containing 1     | <a href="#">Churc1</a>             | 0.748 | -2.317 | 0.0525618   | 0.207422   |
| 19766 | 10494574 | <a href="#">NM_182997</a>          | <a href="#">108097</a>    | protein kinase, AMP-activated,    | <a href="#">Prkab2</a>             | 0.748 | -5.242 | 0.00108831  | 0.0139352  |
| 19767 | 10411646 | <a href="#">NM_022011</a>          | <a href="#">23894</a>     | general transcription factor I    | <a href="#">Gtf2h2</a>             | 0.748 | -5.51  | 0.000810601 | 0.0113281  |
| 19768 | 10376455 | <a href="#">NM_178218</a>          | <a href="#">319162</a>    | histone cluster 3, H2a            | <a href="#">Hist3h2a</a>           | 0.748 | -4.775 | 0.00186413  | 0.0204861  |
| 19769 | 10500445 | <a href="#">NM_026539</a>          | <a href="#">68058</a>     | chromodomain helicase DNA<br>bind | <a href="#">Chd11</a>              | 0.747 | -4.581 | 0.00235214  | 0.0243912  |
| 19770 | 10452316 | <a href="#">NM_009778</a>          | <a href="#">12266</a>     | complement component 3            | <a href="#">C3</a>                 | 0.747 | -3.665 | 0.0076093   | 0.0560791  |
| 19771 | 10590549 | <a href="#">NM_001081188</a>       | <a href="#">66446</a>     | exosome component 7               | <a href="#">Exosc7</a>             | 0.747 | -5.094 | 0.00128672  | 0.0158051  |
| 19772 | 10515211 | <a href="#">ENSMUST00000106521</a> | <a href="#">75173</a>     | RIKEN cDNA 4930544O15<br>gene     | <a href="#">4930544O15Rik</a>      | 0.747 | -2.521 | 0.0388132   | 0.170475   |
| 19773 | 10571705 | <a href="#">NM_008391</a>          | <a href="#">16363</a>     | interferon regulatory factor 2    | <a href="#">Irf2</a>               | 0.747 | -2.18  | 0.0644826   | 0.236295   |
| 19774 | 10415262 | <a href="#">NM_133734</a>          | <a href="#">28199</a>     | WD repeat domain 23               | <a href="#">Wdr23</a>              | 0.747 | -2.683 | 0.0305396   | 0.14545    |
| 19775 | 10486819 | <a href="#">NM_153075</a>          | <a href="#">212670</a>    | cation channel, sperm associat    | <a href="#">Catsper2</a>           | 0.747 | -2.462 | 0.0423594   | 0.180211   |
| 19776 | 10357003 | <a href="#">NM_178779</a>          | <a href="#">320311</a>    | ring finger protein 152           | <a href="#">Rnf152</a>             | 0.747 | -2.707 | 0.0294884   | 0.141867   |

|       |          |                                    |                           |                                   |                                    |       |        |             |            |
|-------|----------|------------------------------------|---------------------------|-----------------------------------|------------------------------------|-------|--------|-------------|------------|
| 19777 | 10575880 | <a href="#">NM_054095</a>          | <a href="#">117148</a>    | N-terminal EF-hand calcium bin    | <a href="#">Necab2</a>             | 0.747 | -4.987 | 0.00145409  | 0.0169958  |
| 19778 | 10447118 | <a href="#">XM_001480757</a>       | <a href="#">100043697</a> | hypothetical protein LOC100043    | <a href="#">LOC100043697</a>       | 0.747 | -3.767 | 0.00663596  | 0.0505655  |
| 19779 | 10360832 | <a href="#">ENSMUST00000050306</a> | <a href="#">73363</a>     | RIKEN cDNA 1700056E22 gene        | <a href="#">1700056E22Rik</a>      | 0.747 | -4.239 | 0.00359584  | 0.0324929  |
| 19780 | 10587104 | <a href="#">NM_021548</a>          | <a href="#">59046</a>     | cAMP-regulated phosphoprotein     | <a href="#">Arpp19</a>             | 0.747 | -4.912 | 0.00158756  | 0.0181641  |
| 19781 | 10518145 | <a href="#">ENSMUST00000084200</a> | <a href="#">110593</a>    | PR domain containing 2, with Z    | <a href="#">Prdm2</a>              | 0.747 | -3.165 | 0.0152015   | 0.0912093  |
| 19782 | 10389783 | <a href="#">ENSMUST00000092790</a> | <a href="#">791385</a>    | predicted gene,<br>ENSMUSG0000006 | <a href="#">ENSMUSG00000069765</a> | 0.746 | -4.279 | 0.00341701  | 0.0313038  |
| 19783 | 10403658 | <a href="#">NM_010317</a>          | <a href="#">14706</a>     | guanine nucleotide binding pro    | <a href="#">Gng4</a>               | 0.746 | -3.95  | 0.00521334  | 0.0424618  |
| 19784 | 10345762 | <a href="#">NM_008362</a>          | <a href="#">16177</a>     | interleukin 1 receptor, type I    | <a href="#">Il1rl1</a>             | 0.746 | -1.521 | 0.170798    | 0.422528   |
| 19785 | 10396608 | <a href="#">NM_001005510</a>       | <a href="#">319565</a>    | synaptic nuclear envelope 2       | <a href="#">Syne2</a>              | 0.746 | -2.785 | 0.026282    | 0.131435   |
| 19786 | 10385081 | <a href="#">AY702092</a>           | <a href="#">448829</a>    | acidic leucine-rich nuclear ph    | <a href="#">Anp32c</a>             | 0.746 | -3.572 | 0.00863128  | 0.0610776  |
| 19787 | 10352133 | <a href="#">NM_026626</a>          | <a href="#">68226</a>     | EF-hand calcium binding domain    | <a href="#">Efcab2</a>             | 0.745 | -4.878 | 0.00165104  | 0.0187283  |
| 19788 | 10397642 |                                    |                           |                                   |                                    | 0.745 | -4.186 | 0.00384467  | 0.0340133  |
| 19789 | 10366712 | <a href="#">NM_001110218</a>       | <a href="#">319468</a>    | protein phosphatase 1H (PP2C d    | <a href="#">Ppm1h</a>              | 0.745 | -6.495 | 0.000295831 | 0.00567095 |
| 19790 | 10510546 | <a href="#">NM_023119</a>          | <a href="#">13806</a>     | enolase 1, alpha non-neuron       | <a href="#">Eno1</a>               | 0.745 | -3.748 | 0.0068107   | 0.0514316  |
| 19791 | 10399632 |                                    |                           |                                   |                                    | 0.745 | -2.249 | 0.0582209   | 0.22161    |
| 19792 | 10598467 | <a href="#">NM_138606</a>          | <a href="#">18715</a>     | proviral integration site 2       | <a href="#">Pim2</a>               | 0.745 | -4.525 | 0.00251782  | 0.0255333  |
| 19793 | 10403246 | <a href="#">XR_030658</a>          | <a href="#">667375</a>    | similar to COX11 homolog, cyto    | <a href="#">LOC667375</a>          | 0.745 | -2.319 | 0.0524105   | 0.207062   |
| 19794 | 10458016 | <a href="#">NM_008934</a>          | <a href="#">19123</a>     | protein C                         | <a href="#">Proc</a>               | 0.745 | -4.571 | 0.00238069  | 0.0246076  |
| 19795 | 10376239 | <a href="#">AF357392</a>           | <a href="#">21454</a>     | t-complex protein 1               | <a href="#">Tcp1</a>               | 0.745 | -1.472 | 0.183161    | 0.440085   |
| 19796 | 10580411 |                                    |                           |                                   |                                    | 0.744 | -4.369 | 0.00305365  | 0.0290634  |
| 19797 | 10581910 | <a href="#">NM_025781</a>          | <a href="#">66817</a>     | transmembrane protein 170         | <a href="#">Tmem170</a>            | 0.744 | -3.139 | 0.0157754   | 0.0934331  |
| 19798 | 10524878 | <a href="#">NM_001033311</a>       | <a href="#">231668</a>    | cDNA sequence BC023744            | <a href="#">BC023744</a>           | 0.744 | -4.747 | 0.00192808  | 0.0210249  |
| 19799 | 10488060 | <a href="#">NM_013822</a>          | <a href="#">16449</a>     | jagged 1                          | <a href="#">Jag1</a>               | 0.744 | -2.307 | 0.0533277   | 0.209428   |
| 19800 | 10492888 |                                    |                           |                                   |                                    | 0.744 | -3.21  | 0.0142722   | 0.0871222  |
| 19801 | 10423825 | <a href="#">NM_008056</a>          | <a href="#">14368</a>     | frizzled homolog 6 (Drosophila    | <a href="#">Fzd6</a>               | 0.744 | -3.738 | 0.00690122  | 0.0519471  |
| 19802 | 10402606 | <a href="#">NM_184109</a>          | <a href="#">353326</a>    | retrotransposon-like 1            | <a href="#">Rtl1</a>               | 0.744 | -5.331 | 0.000985605 | 0.01296    |
| 19803 | 10376532 | <a href="#">NM_001011740</a>       | <a href="#">257886</a>    | olfactory receptor 225            | <a href="#">Olfr225</a>            | 0.744 | -2.122 | 0.0703169   | 0.248459   |
| 19804 | 10599962 | <a href="#">NM_001081354</a>       | <a href="#">333639</a>    | mastermind-like domain contain    | <a href="#">Mamld1</a>             | 0.744 | -4.48  | 0.00266086  | 0.0265885  |
| 19805 | 10388782 |                                    |                           |                                   |                                    | 0.743 | -1.495 | 0.177331    | 0.43172    |
| 19806 | 10532669 | <a href="#">NM_172884</a>          | <a href="#">243219</a>    | RIKEN cDNA 2900026A02 gene        | <a href="#">2900026A02Rik</a>      | 0.743 | -3.957 | 0.00516451  | 0.0422268  |
| 19807 | 10554487 | <a href="#">NM_054085</a>          | <a href="#">116904</a>    | alpha-kinase 3                    | <a href="#">Alpk3</a>              | 0.743 | -1.784 | 0.116276    | 0.33911    |
| 19808 | 10400293 | <a href="#">BC089589</a>           | <a href="#">328092</a>    | RIKEN cDNA 6530401N04 gene        | <a href="#">6530401N04Rik</a>      | 0.743 | -7.188 | 0.000155416 | 0.00371308 |
| 19809 | 10448865 | <a href="#">NM_172529</a>          | <a href="#">214505</a>    | N-acetylglucosamine-1-phosphot    | <a href="#">Gnptg</a>              | 0.743 | -4.977 | 0.00147202  | 0.0171324  |
| 19810 | 10368836 |                                    |                           |                                   |                                    | 0.743 | -4.192 | 0.00381443  | 0.0337914  |
| 19811 | 10511444 | <a href="#">XM_001472912</a>       | <a href="#">100039478</a> | similar to ribosomal protein L    | <a href="#">LOC100039478</a>       | 0.743 | -2.498 | 0.0401229   | 0.174258   |
| 19812 | 10404218 | <a href="#">NM_008156</a>          | <a href="#">14756</a>     | glycosylphosphatidylinositol s    | <a href="#">Gpld1</a>              | 0.743 | -4.503 | 0.00258759  | 0.0260286  |
| 19813 | 10424213 | <a href="#">NM_199449</a>          | <a href="#">387609</a>    | zinc fingers and homeoboxes 2     | <a href="#">Zhx2</a>               | 0.743 | -6.441 | 0.000311712 | 0.00584812 |
| 19814 | 10476702 | <a href="#">NM_019787</a>          | <a href="#">27054</a>     | SEC23B (S. cerevisiae)            | <a href="#">Sec23b</a>             | 0.743 | -4.212 | 0.00371807  | 0.033241   |
| 19815 | 10545886 | <a href="#">BC029200</a>           | <a href="#">75541</a>     | RIKEN cDNA 1700019G17 gene        | <a href="#">1700019G17Rik</a>      | 0.743 | -3.196 | 0.0145622   | 0.0884274  |
| 19816 | 10442445 | <a href="#">NM_010023</a>          | <a href="#">13177</a>     | dodecenoyl-Coenzyme A delta is    | <a href="#">Dci</a>                | 0.743 | -5.97  | 0.000498854 | 0.00808259 |
| 19817 | 10345350 |                                    |                           |                                   |                                    | 0.742 | -3.319 | 0.0122442   | 0.0778362  |
| 19818 | 10344799 | <a href="#">NM_026493</a>          | <a href="#">211660</a>    | centrosome and spindle pole as    | <a href="#">Cspp1</a>              | 0.742 | -4.271 | 0.00345126  | 0.0314812  |
| 19819 | 10527148 | <a href="#">NM_146257</a>          | <a href="#">243328</a>    | solute carrier family 29 (nucl    | <a href="#">Slc29a4</a>            | 0.742 | -3.267 | 0.0131677   | 0.0823476  |
| 19820 | 10463704 | <a href="#">NM_020577</a>          | <a href="#">57344</a>     | arsenic (+3 oxidation state) m    | <a href="#">As3mt</a>              | 0.742 | -2.766 | 0.0270596   | 0.13393    |
| 19821 | 10496110 | <a href="#">NM_011863</a>          | <a href="#">23971</a>     | 3'-phosphoadenosine 5'-phospho    | <a href="#">Papss1</a>             | 0.742 | -4.056 | 0.00454295  | 0.0383611  |
| 19822 | 10411882 | <a href="#">NM_029447</a>          | <a href="#">75805</a>     | neurolysin (metallopeptidase M    | <a href="#">Nln</a>                | 0.742 | -5.056 | 0.00134359  | 0.0162056  |
| 19823 | 10370000 | <a href="#">NM_008185</a>          | <a href="#">14871</a>     | glutathione S-transferase, the    | <a href="#">Gstt1</a>              | 0.742 | -2.389 | 0.0472075   | 0.193141   |
| 19824 | 10588037 | <a href="#">NM_011254</a>          | <a href="#">19659</a>     | retinol binding protein 1, cel    | <a href="#">Rbp1</a>               | 0.742 | -5.396 | 0.0009181   | 0.0123645  |
| 19825 | 10383204 | <a href="#">ENSMUST00000093902</a> | <a href="#">672511</a>    | hypothetical LOC672511            | <a href="#">LOC672511</a>          | 0.742 | -1.423 | 0.19646     | 0.45698    |
| 19826 | 10381994 | <a href="#">NM_001037712</a>       | <a href="#">192775</a>    | potassium voltage-gated channe    | <a href="#">Kenh6</a>              | 0.741 | -4.307 | 0.00329957  | 0.030559   |
| 19827 | 10504668 |                                    |                           |                                   |                                    | 0.741 | -4.579 | 0.00235792  | 0.0244392  |
| 19828 | 10568217 | <a href="#">BC004623</a>           | <a href="#">66422</a>     | RIKEN cDNA 2410015N17 gene        | <a href="#">2410015N17Rik</a>      | 0.741 | -5.058 | 0.00134118  | 0.0162022  |
| 19829 | 10468253 | <a href="#">NM_029810</a>          | <a href="#">76952</a>     | 5'-nucleotidase, cytosolic II     | <a href="#">Nt5c2</a>              | 0.741 | -3.601 | 0.00829427  | 0.0594047  |

|       |          |                                    |                           |                                |                                    |       |        |             |            |
|-------|----------|------------------------------------|---------------------------|--------------------------------|------------------------------------|-------|--------|-------------|------------|
| 19830 | 10552156 | <a href="#">NM_027897</a>          | <a href="#">52428</a>     | rhophilin, Rho GTPase binding  | <a href="#">Rhp2</a>               | 0.741 | -4.29  | 0.00337087  | 0.0310227  |
| 19831 | 10424853 | <a href="#">NM_021555</a>          | <a href="#">59053</a>     | brain protein 16               | <a href="#">Brp16</a>              | 0.741 | -3.191 | 0.0146558   | 0.0887615  |
| 19832 | 10438178 | <a href="#">BC115678</a>           | <a href="#">74685</a>     | RIKEN cDNA 4930451C15 gene     | <a href="#">4930451C15Rik</a>      | 0.741 | -2.78  | 0.0264795   | 0.132141   |
| 19833 | 10404763 | <a href="#">ENSMUST00000116419</a> | <a href="#">621976</a>    | predicted gene, EG621976       | <a href="#">EG621976</a>           | 0.741 | -3.881 | 0.00570731  | 0.0453497  |
| 19834 | 10562320 | <a href="#">XR_035017</a>          | <a href="#">100043866</a> | similar to ribosomal protein L | <a href="#">LOC100043866</a>       | 0.741 | -1.92  | 0.0951583   | 0.299766   |
| 19835 | 10538179 | <a href="#">NM_172888</a>          | <a href="#">243377</a>    | seminal vesicle secretory prot | <a href="#">Svs1</a>               | 0.741 | -2.372 | 0.0484334   | 0.196802   |
| 19836 | 10501832 | <a href="#">NM_008991</a>          | <a href="#">19299</a>     | ATP-binding cassette, sub-fami | <a href="#">Abcd3</a>              | 0.741 | -5.931 | 0.000519221 | 0.00829872 |
| 19837 | 10367641 | <a href="#">NM_172308</a>          | <a href="#">270685</a>    | methylenetetrahydrofolate dehy | <a href="#">Mthfd11</a>            | 0.741 | -6.347 | 0.000341802 | 0.00618755 |
| 19838 | 10426827 | <a href="#">NM_001024526</a>       | <a href="#">207214</a>    | La ribonucleoprotein domain fa | <a href="#">Larp4</a>              | 0.74  | -7.386 | 0.000130474 | 0.00329708 |
| 19839 | 10521469 |                                    |                           |                                |                                    | 0.74  | -2.2   | 0.0626225   | 0.231629   |
| 19840 | 10551998 |                                    |                           |                                |                                    | 0.74  | -3.617 | 0.00811942  | 0.0585528  |
| 19841 | 10449312 | <a href="#">NM_001122657</a>       | <a href="#">100038804</a> | predicted gene, ENSMUSG0000007 | <a href="#">ENSMUSG00000073431</a> | 0.74  | -2.368 | 0.0487008   | 0.197418   |
| 19842 | 10448557 |                                    |                           |                                |                                    | 0.739 | -2.481 | 0.0411674   | 0.176883   |
| 19843 | 10563820 | <a href="#">ENSMUST00000098414</a> | <a href="#">75744</a>     | RIKEN cDNA 6620401M08 gene     | <a href="#">6620401M08Rik</a>      | 0.739 | -4.412 | 0.00289412  | 0.0281478  |
| 19844 | 10384566 |                                    |                           |                                |                                    | 0.739 | -4.267 | 0.00346858  | 0.031596   |
| 19845 | 10357594 | <a href="#">NM_018750</a>          | <a href="#">54354</a>     | Ras association (RalGDS/AF-6)  | <a href="#">Rassf5</a>             | 0.739 | -5.344 | 0.000971617 | 0.0128559  |
| 19846 | 10553301 | <a href="#">NM_010699</a>          | <a href="#">16828</a>     | lactate dehydrogenase A        | <a href="#">Ldha</a>               | 0.739 | -3.224 | 0.013999    | 0.0858692  |
| 19847 | 10366705 | <a href="#">XR_034838</a>          | <a href="#">668275</a>    | similar to glyceraldehyde-3-ph | <a href="#">LOC668275</a>          | 0.739 | -3.111 | 0.0164294   | 0.0962129  |
| 19848 | 10397153 | <a href="#">NM_134247</a>          | <a href="#">171282</a>    | acyl-CoA thioesterase 4        | <a href="#">Acot4</a>              | 0.739 | -3.53  | 0.0091454   | 0.0636925  |
| 19849 | 10364091 |                                    |                           |                                |                                    | 0.739 | -2.421 | 0.0450367   | 0.187748   |
| 19850 | 10500529 | <a href="#">NM_016966</a>          | <a href="#">236539</a>    | 3-phosphoglycerate dehydrogena | <a href="#">Phgdh</a>              | 0.739 | -2.269 | 0.0564515   | 0.217193   |
| 19851 | 10495163 | <a href="#">NM_026013</a>          | <a href="#">67171</a>     | transmembrane protein 77       | <a href="#">Tmem77</a>             | 0.738 | -3.067 | 0.0174936   | 0.0999956  |
| 19852 | 10410947 | <a href="#">NM_028012</a>          | <a href="#">108138</a>    | X-ray repair complementing def | <a href="#">Xrcc4</a>              | 0.738 | -2.336 | 0.0510981   | 0.203968   |
| 19853 | 10578572 | <a href="#">NM_001114311</a>       | <a href="#">71069</a>     | storkhead box 2                | <a href="#">Stox2</a>              | 0.738 | -2.741 | 0.0280525   | 0.137429   |
| 19854 | 10474588 | <a href="#">BC115477</a>           | <a href="#">73024</a>     | RIKEN cDNA 2900064A13 gene     | <a href="#">2900064A13Rik</a>      | 0.738 | -4.415 | 0.00288508  | 0.0280987  |
| 19855 | 10344819 | <a href="#">NM_026493</a>          | <a href="#">211660</a>    | centrosome and spindle pole as | <a href="#">Csppl</a>              | 0.738 | -4.593 | 0.00231792  | 0.024131   |
| 19856 | 10408812 | <a href="#">NM_008547</a>          | <a href="#">17152</a>     | male germ cell-associated kina | <a href="#">Mak</a>                | 0.738 | -3.873 | 0.00576628  | 0.045698   |
| 19857 | 10381736 | <a href="#">NM_001033212</a>       | <a href="#">104582</a>    | reprimo-like                   | <a href="#">Rprml</a>              | 0.737 | -2.419 | 0.0451684   | 0.187967   |
| 19858 | 10561721 | <a href="#">NM_001081028</a>       | <a href="#">74206</a>     | signal-induced proliferation-a | <a href="#">Sipa13</a>             | 0.737 | -4.796 | 0.00181873  | 0.0201231  |
| 19859 | 10568050 | <a href="#">NM_007438</a>          | <a href="#">11674</a>     | aldolase I, A isoform          | <a href="#">Aldoa</a>              | 0.737 | -3.752 | 0.00677271  | 0.0513086  |
| 19860 | 10537458 | <a href="#">NM_001004182</a>       | <a href="#">434008</a>    | predicted gene, EG434008       | <a href="#">EG434008</a>           | 0.737 | -2.114 | 0.0712202   | 0.250729   |
| 19861 | 10347232 | <a href="#">NM_009533</a>          | <a href="#">22596</a>     | X-ray repair complementing def | <a href="#">Xrcc5</a>              | 0.737 | -6.692 | 0.000245081 | 0.00503604 |
| 19862 | 10509204 | <a href="#">NM_011542</a>          | <a href="#">21401</a>     | transcription elongation facto | <a href="#">Tcea3</a>              | 0.737 | -6.654 | 0.000254141 | 0.00515463 |
| 19863 | 10390001 | <a href="#">NM_170671</a>          | <a href="#">104601</a>    | Mycbp associated protein       | <a href="#">Mycbpap</a>            | 0.737 | -3.257 | 0.013358    | 0.0831201  |
| 19864 | 10496023 | <a href="#">NM_009811</a>          | <a href="#">12368</a>     | caspase 6                      | <a href="#">Casp6</a>              | 0.737 | -4.371 | 0.00304428  | 0.0290602  |
| 19865 | 10482846 | <a href="#">BC062650</a>           | <a href="#">227933</a>    | coiled-coil domain containing  | <a href="#">Ccdc148</a>            | 0.736 | -3.843 | 0.00599844  | 0.0469175  |
| 19866 | 10398885 | <a href="#">NM_001024602</a>       | <a href="#">217882</a>    | expressed sequence AW555464    | <a href="#">AW555464</a>           | 0.736 | -7.747 | 9.57557e-05 | 0.00271766 |
| 19867 | 10370471 | <a href="#">NM_053014</a>          | <a href="#">28169</a>     | 1-acylglycerol-3-phosphate O-a | <a href="#">Agpat3</a>             | 0.736 | -4.902 | 0.00160656  | 0.0183319  |
| 19868 | 10344637 | <a href="#">NM_133826</a>          | <a href="#">108664</a>    | ATPase, H+ transporting, lysos | <a href="#">Atp6v1h</a>            | 0.736 | -6.053 | 0.000458097 | 0.00760508 |
| 19869 | 10572077 | <a href="#">ENSMUST00000015051</a> | <a href="#">234344</a>    | nuclear assembly factor 1 homo | <a href="#">Naf1</a>               | 0.736 | -2.726 | 0.0286623   | 0.138999   |
| 19870 | 10438666 |                                    |                           |                                |                                    | 0.735 | -2.56  | 0.0366499   | 0.163763   |
| 19871 | 10351039 | <a href="#">NR_002840</a>          | <a href="#">14455</a>     | growth arrest specific 5       | <a href="#">Gas5</a>               | 0.735 | -2.974 | 0.0199776   | 0.109802   |
| 19872 | 10408937 | <a href="#">NM_009124</a>          | <a href="#">20238</a>     | ataxin 1                       | <a href="#">Atxn1</a>              | 0.735 | -2.426 | 0.0446947   | 0.187121   |
| 19873 | 10479973 | <a href="#">ENSMUST00000076071</a> | <a href="#">791270</a>    | predicted gene, ENSMUSG0000006 | <a href="#">ENSMUSG00000062319</a> | 0.735 | -1.258 | 0.247667    | 0.520853   |
| 19874 | 10539358 | <a href="#">BC126949</a>           | <a href="#">71837</a>     | RIKEN cDNA 1700003E16 gene     | <a href="#">1700003E16Rik</a>      | 0.735 | -2.027 | 0.0810244   | 0.271716   |
| 19875 | 10527306 | <a href="#">NM_001081109</a>       | <a href="#">231876</a>    | lemur tyrosine kinase 2        | <a href="#">Lmtk2</a>              | 0.735 | -5.663 | 0.000687741 | 0.010129   |
| 19876 | 10415074 | <a href="#">NM_080726</a>          | <a href="#">140743</a>    | rad and gem related GTP bindin | <a href="#">Rem2</a>               | 0.735 | -3.115 | 0.0163356   | 0.0959177  |
| 19877 | 10539577 | <a href="#">ENSMUST00000095768</a> | <a href="#">20751</a>     | sepiapterin reductase          | <a href="#">Spr</a>                | 0.734 | -3.762 | 0.0066788   | 0.0507973  |
| 19878 | 10577340 | <a href="#">NM_181683</a>          | <a href="#">353320</a>    | defensin beta 37               | <a href="#">Defb37</a>             | 0.734 | -1.829 | 0.108879    | 0.325713   |
| 19879 | 10580391 | <a href="#">NM_028007</a>          | <a href="#">71927</a>     | integrin alpha FG-GAP repeat c | <a href="#">Itfg1</a>              | 0.734 | -5.722 | 0.000646162 | 0.00969655 |
| 19880 | 10373810 | <a href="#">NM_173745</a>          | <a href="#">75219</a>     | dual specificity phosphatase 1 | <a href="#">Dusp18</a>             | 0.734 | -5.635 | 0.000708676 | 0.0103411  |
| 19881 | 10607143 | <a href="#">NM_007603</a>          | <a href="#">12338</a>     | calpain 6                      | <a href="#">Capn6</a>              | 0.733 | -3.426 | 0.0105562   | 0.0705216  |
| 19882 | 10579649 | <a href="#">BC120812</a>           | <a href="#">234421</a>    | calcium and integrin binding f | <a href="#">Cib3</a>               | 0.733 | -2.916 | 0.0217353   | 0.115848   |

|       |          |                              |                        |                                |                               |       |        |             |            |
|-------|----------|------------------------------|------------------------|--------------------------------|-------------------------------|-------|--------|-------------|------------|
| 19883 | 10360789 | <a href="#">NM_007853</a>    | <a href="#">13244</a>  | degenerative spermatocyte homo | <a href="#">Degs1</a>         | 0.733 | -4.352 | 0.00311773  | 0.0294554  |
| 19884 | 10499342 | <a href="#">NM_029801</a>    | <a href="#">76927</a>  | RIKEN cDNA 1700021C14 gene     | <a href="#">1700021C14Rik</a> | 0.733 | -4.872 | 0.00166225  | 0.0187836  |
| 19885 | 10503170 | <a href="#">NM_001081417</a> | <a href="#">320790</a> | chromodomain helicase DNA bind | <a href="#">Chd7</a>          | 0.733 | -5.102 | 0.00127551  | 0.0157256  |
| 19886 | 10452110 | <a href="#">BC056164</a>     | <a href="#">224904</a> | RIKEN cDNA 2410015M20 gene     | <a href="#">2410015M20Rik</a> | 0.733 | -4.114 | 0.00421274  | 0.0361943  |
| 19887 | 10428232 | <a href="#">NM_199476</a>    | <a href="#">382985</a> | ribonucleotide reductase M2 B  | <a href="#">Rrm2b</a>         | 0.733 | -4.367 | 0.00305997  | 0.0290786  |
| 19888 | 10382625 | <a href="#">NM_145438</a>    | <a href="#">217325</a> | lethal giant larvae homolog 2  | <a href="#">Lgl2</a>          | 0.733 | -4.739 | 0.00194691  | 0.021143   |
| 19889 | 10537834 | <a href="#">NM_133674</a>    | <a href="#">54324</a>  | Rho guanine nucleotide exchang | <a href="#">Arhgef5</a>       | 0.732 | -5.607 | 0.000730066 | 0.010573   |
| 19890 | 10469536 |                              |                        |                                |                               | 0.732 | -4.809 | 0.00179029  | 0.0198551  |
| 19891 | 10457927 | <a href="#">XR_031234</a>    | <a href="#">433168</a> | similar to ribosomal protein L | <a href="#">LOC433168</a>     | 0.732 | -3.188 | 0.0147138   | 0.0890152  |
| 19892 | 10500796 |                              |                        |                                |                               | 0.732 | -0.601 | 0.566412    | 0.79227    |
| 19893 | 10596119 | <a href="#">NM_001081122</a> | <a href="#">28135</a>  | centrosomal protein 63         | <a href="#">Cep63</a>         | 0.732 | -7.288 | 0.000142212 | 0.00347475 |
| 19894 | 10561918 |                              |                        |                                |                               | 0.732 | -2.008 | 0.0833973   | 0.276517   |
| 19895 | 10595371 | <a href="#">NM_026122</a>    | <a href="#">94353</a>  | high mobility group nucleosoma | <a href="#">Hmgn3</a>         | 0.732 | -4.555 | 0.00242826  | 0.024948   |
| 19896 | 10571975 |                              |                        |                                |                               | 0.732 | -1.095 | 0.308555    | 0.585197   |
| 19897 | 10495820 | <a href="#">NM_007980</a>    | <a href="#">14079</a>  | fatty acid binding protein 2,  | <a href="#">Fabp2</a>         | 0.732 | -1.745 | 0.123209    | 0.351285   |
| 19898 | 10474411 | <a href="#">NM_011699</a>    | <a href="#">22343</a>  | lin-7 homolog C (C. elegans)   | <a href="#">Lin7c</a>         | 0.732 | -6.688 | 0.000245987 | 0.0050424  |
| 19899 | 10515822 | <a href="#">NM_146713</a>    | <a href="#">258708</a> | olfactory receptor 1342        | <a href="#">Olfr1342</a>      | 0.732 | -1.937 | 0.0927529   | 0.295001   |
| 19900 | 10500677 | <a href="#">NM_013486</a>    | <a href="#">12481</a>  | CD2 antigen                    | <a href="#">Cd2</a>           | 0.732 | -2.3   | 0.0539179   | 0.210728   |
| 19901 | 10572637 | <a href="#">BC020119</a>     | <a href="#">73711</a>  | RIKEN cDNA 1110012M11 gene     | <a href="#">1110012M11Rik</a> | 0.732 | -5.244 | 0.00108645  | 0.0139228  |
| 19902 | 10354205 | <a href="#">XR_031026</a>    | <a href="#">329126</a> | predicted gene, EG329126       | <a href="#">EG329126</a>      | 0.731 | -1.801 | 0.113481    | 0.333876   |
| 19903 | 10369909 |                              |                        |                                |                               | 0.731 | -1.517 | 0.171832    | 0.42401    |
| 19904 | 10413726 | <a href="#">NM_009393</a>    | <a href="#">21924</a>  | troponin C, cardiac/slow skele | <a href="#">Tnnc1</a>         | 0.731 | -3.782 | 0.00650266  | 0.0497259  |
| 19905 | 10546452 | <a href="#">NM_175314</a>    | <a href="#">101401</a> | a disintegrin-like and metallo | <a href="#">Adamts9</a>       | 0.731 | -6.074 | 0.000448459 | 0.00750769 |
| 19906 | 10389022 | <a href="#">NM_177390</a>    | <a href="#">338367</a> | myosin ID                      | <a href="#">Myo1d</a>         | 0.731 | -4.338 | 0.00317496  | 0.0298423  |
| 19907 | 10396652 | <a href="#">NM_001002012</a> | <a href="#">15512</a>  | heat shock protein 2           | <a href="#">Hspa2</a>         | 0.731 | -4.105 | 0.00426311  | 0.0365503  |
| 19908 | 10387155 | <a href="#">NM_027963</a>    | <a href="#">71860</a>  | WD repeat domain 16            | <a href="#">Wdr16</a>         | 0.731 | -3.93  | 0.00534818  | 0.0433763  |
| 19909 | 10544114 | <a href="#">NM_010433</a>    | <a href="#">15258</a>  | homeodomain interacting protei | <a href="#">Hipk2</a>         | 0.73  | -5.64  | 0.000704823 | 0.0103062  |
| 19910 | 10464583 | <a href="#">NM_013541</a>    | <a href="#">14870</a>  | glutathione S-transferase, pi  | <a href="#">Gstp1</a>         | 0.73  | -4.592 | 0.00232138  | 0.0241314  |
| 19911 | 10425966 | <a href="#">NM_016843</a>    | <a href="#">54138</a>  | ataxin 10                      | <a href="#">Atxn10</a>        | 0.73  | -6.393 | 0.000326695 | 0.0060276  |
| 19912 | 10485131 | <a href="#">NM_172670</a>    | <a href="#">228366</a> | glycosyltransferase-like 1B    | <a href="#">Gylt1b</a>        | 0.73  | -5.015 | 0.00140906  | 0.0166908  |
| 19913 | 10349782 | <a href="#">NM_028778</a>    | <a href="#">74137</a>  | NUAK family, SNF1-like kinase, | <a href="#">Nuak2</a>         | 0.73  | -2.987 | 0.01962     | 0.108456   |
| 19914 | 10364468 | <a href="#">NM_009768</a>    | <a href="#">12215</a>  | basigin                        | <a href="#">Bsg</a>           | 0.73  | -6.768 | 0.000228282 | 0.00481235 |
| 19915 | 10545065 | <a href="#">NM_183183</a>    | <a href="#">243385</a> | GPRIN family member 3          | <a href="#">Gprin3</a>        | 0.73  | -3.584 | 0.00849329  | 0.0604247  |
| 19916 | 10525677 | <a href="#">NM_145070</a>    | <a href="#">29816</a>  | huntingtin interacting protein | <a href="#">Hip1r</a>         | 0.73  | -4.868 | 0.00167043  | 0.0188071  |
| 19917 | 10503410 | <a href="#">NM_181401</a>    | <a href="#">100201</a> | transmembrane protein 64       | <a href="#">Tmem64</a>        | 0.729 | -7.498 | 0.000118351 | 0.0031086  |
| 19918 | 10547073 |                              |                        |                                |                               | 0.729 | -3.601 | 0.00829654  | 0.0594047  |
| 19919 | 10382802 | <a href="#">NM_011451</a>    | <a href="#">20698</a>  | sphingosine kinase 1           | <a href="#">Sphk1</a>         | 0.729 | -4.522 | 0.00252773  | 0.0256215  |
| 19920 | 10575363 | <a href="#">NM_175480</a>    | <a href="#">234725</a> | zinc finger protein 612        | <a href="#">Zfp612</a>        | 0.729 | -4.533 | 0.00249542  | 0.0253791  |
| 19921 | 10573348 | <a href="#">NM_007578</a>    | <a href="#">12286</a>  | calcium channel, voltage-depen | <a href="#">Cacna1a</a>       | 0.729 | -5.596 | 0.000738423 | 0.0106575  |
| 19922 | 10461057 | <a href="#">NM_054048</a>    | <a href="#">104383</a> | REST corepressor 2             | <a href="#">Rcor2</a>         | 0.728 | -4.369 | 0.00305424  | 0.0290634  |
| 19923 | 10550181 |                              |                        |                                |                               | 0.728 | -1.742 | 0.123831    | 0.35211    |
| 19924 | 10541695 | <a href="#">NM_145130</a>    | <a href="#">14792</a>  | membrane bound O-acyltransfera | <a href="#">Mboat5</a>        | 0.728 | -5.116 | 0.00125567  | 0.015499   |
| 19925 | 10505996 | <a href="#">NM_001113412</a> | <a href="#">75578</a>  | FGGY carbohydrate kinase domai | <a href="#">Fggy</a>          | 0.728 | -1.785 | 0.116227    | 0.339013   |
| 19926 | 10422219 |                              |                        |                                |                               | 0.728 | -2.57  | 0.0360736   | 0.162044   |
| 19927 | 10587792 | <a href="#">NM_011636</a>    | <a href="#">22038</a>  | phospholipid scramblase 1      | <a href="#">Plscr1</a>        | 0.728 | -6.011 | 0.000478322 | 0.00783396 |
| 19928 | 10445796 | <a href="#">BC022574</a>     | <a href="#">106821</a> | expressed sequence AI314976    | <a href="#">AI314976</a>      | 0.728 | -4.975 | 0.00147465  | 0.0171413  |
| 19929 | 10344809 | <a href="#">NM_026493</a>    | <a href="#">211660</a> | centrosome and spindle pole as | <a href="#">Cspp1</a>         | 0.728 | -2.796 | 0.0258829   | 0.130308   |
| 19930 | 10497048 |                              |                        |                                |                               | 0.728 | -5.484 | 0.000833634 | 0.0115341  |
| 19931 | 10544106 |                              |                        |                                |                               | 0.728 | -2.371 | 0.0484905   | 0.196834   |
| 19932 | 10379163 | <a href="#">NM_201406</a>    | <a href="#">276846</a> | phosphatidylinositol glycan an | <a href="#">Pigs</a>          | 0.728 | -5.61  | 0.000727668 | 0.0105559  |
| 19933 | 10538420 | <a href="#">NM_180678</a>    | <a href="#">353172</a> | glycyl-tRNA synthetase         | <a href="#">Gars</a>          | 0.727 | -5.811 | 0.000588188 | 0.00910442 |

|       |          |                                    |                        |                                |                               |       |        |             |            |
|-------|----------|------------------------------------|------------------------|--------------------------------|-------------------------------|-------|--------|-------------|------------|
| 19934 | 10503222 | <a href="#">NM_001081417</a>       | <a href="#">320790</a> | chromodomain helicase DNA bind | <a href="#">Chd7</a>          | 0.727 | -4.271 | 0.00345115  | 0.0314812  |
| 19935 | 10379153 | <a href="#">NM_009657</a>          | <a href="#">11676</a>  | aldolase 3, C isoform          | <a href="#">Aldoc</a>         | 0.727 | -5.878 | 0.000548788 | 0.00862719 |
| 19936 | 10352867 | <a href="#">NM_008882</a>          | <a href="#">18845</a>  | plexin A2                      | <a href="#">Plxn2</a>         | 0.727 | -3.011 | 0.0189497   | 0.105746   |
| 19937 | 10402142 | <a href="#">NM_026681</a>          | <a href="#">68339</a>  | coiled-coil domain containing  | <a href="#">Ccdc88c</a>       | 0.727 | -4.974 | 0.00147625  | 0.0171505  |
| 19938 | 10485027 | <a href="#">NM_010168</a>          | <a href="#">14061</a>  | coagulation factor II          | <a href="#">F2</a>            | 0.727 | -4.238 | 0.00359916  | 0.0324929  |
| 19939 | 10469941 |                                    |                        |                                |                               | 0.726 | -2.02  | 0.0819438   | 0.273497   |
| 19940 | 10507286 | <a href="#">NM_008389</a>          | <a href="#">16351</a>  | IAP promoted placental gene    | <a href="#">Ipp</a>           | 0.726 | -6.941 | 0.000194324 | 0.00432822 |
| 19941 | 10489569 | <a href="#">NM_011125</a>          | <a href="#">18830</a>  | phospholipid transfer protein  | <a href="#">Pltp</a>          | 0.726 | -5.563 | 0.000765217 | 0.0109028  |
| 19942 | 10351259 | <a href="#">NM_054087</a>          | <a href="#">116914</a> | solute carrier family 19 (thia | <a href="#">Slc19a2</a>       | 0.726 | -3.048 | 0.0179641   | 0.101886   |
| 19943 | 10392120 | <a href="#">NM_031878</a>          | <a href="#">83796</a>  | SWI/SNF related, matrix associ | <a href="#">Smardc2</a>       | 0.726 | -6.054 | 0.000457857 | 0.00760508 |
| 19944 | 10356333 | <a href="#">NR_002851</a>          | <a href="#">80828</a>  | small nucleolar RNA, C/D box 8 | <a href="#">Snord82</a>       | 0.726 | -3.134 | 0.0159001   | 0.0940661  |
| 19945 | 10582973 | <a href="#">NM_026962</a>          | <a href="#">69149</a>  | kelch repeat and BTB (POZ) dom | <a href="#">Kbtbd3</a>        | 0.726 | -5.019 | 0.0014018   | 0.016658   |
| 19946 | 10515797 | <a href="#">NM_172383</a>          | <a href="#">230678</a> | transmembrane protein 125      | <a href="#">Tmem125</a>       | 0.726 | -2.738 | 0.0281769   | 0.137705   |
| 19947 | 10572730 | <a href="#">NM_133358</a>          | <a href="#">170938</a> | zinc finger protein 617        | <a href="#">Zfp617</a>        | 0.726 | -4.801 | 0.00180811  | 0.0200266  |
| 19948 | 10588263 | <a href="#">NM_033314</a>          | <a href="#">24059</a>  | solute carrier organic anion t | <a href="#">Slco2a1</a>       | 0.726 | -3.665 | 0.00760457  | 0.0560791  |
| 19949 | 10401149 | <a href="#">NM_013738</a>          | <a href="#">27260</a>  | pleckstrin 2                   | <a href="#">Plek2</a>         | 0.726 | -2.468 | 0.04199     | 0.179108   |
| 19950 | 10398380 |                                    |                        |                                |                               | 0.726 | -1.05  | 0.327784    | 0.604012   |
| 19951 | 10580537 | <a href="#">NM_010241</a>          | <a href="#">14339</a>  | thymoma viral proto-oncogene 1 | <a href="#">Aktip</a>         | 0.725 | -4.438 | 0.00280415  | 0.0275644  |
| 19952 | 10545528 | <a href="#">AF216308</a>           | <a href="#">56176</a>  | phosphatidylinositol glycan an | <a href="#">Pigp</a>          | 0.725 | -3.751 | 0.00677658  | 0.0513195  |
| 19953 | 10593671 | <a href="#">ENSMUST00000047765</a> | <a href="#">235380</a> | Dmx-like 2                     | <a href="#">Dmxl2</a>         | 0.725 | -5.695 | 0.000664335 | 0.00987813 |
| 19954 | 10416004 | <a href="#">NM_199029</a>          | <a href="#">380912</a> | zinc finger protein 395        | <a href="#">Zfp395</a>        | 0.725 | -4.323 | 0.00323309  | 0.0301509  |
| 19955 | 10603026 | <a href="#">NM_018737</a>          | <a href="#">55936</a>  | cytidine 5'-triphosphate synth | <a href="#">Ctps2</a>         | 0.725 | -7.318 | 0.000138488 | 0.00342078 |
| 19956 | 10595753 | <a href="#">NM_011643</a>          | <a href="#">22063</a>  | transient receptor potential c | <a href="#">Trpc1</a>         | 0.725 | -2.996 | 0.019368    | 0.107409   |
| 19957 | 10360914 | <a href="#">NM_146106</a>          | <a href="#">226791</a> | lysophospholipase-like 1       | <a href="#">Lyplal1</a>       | 0.725 | -4.047 | 0.00459405  | 0.0387152  |
| 19958 | 10537722 | <a href="#">NM_175408</a>          | <a href="#">109218</a> | transmembrane protein 139      | <a href="#">Tmem139</a>       | 0.724 | -6.983 | 0.000187092 | 0.00422236 |
| 19959 | 10582699 | <a href="#">BC023675</a>           | <a href="#">66523</a>  | RIKEN cDNA 2810004N23 gene     | <a href="#">2810004N23Rik</a> | 0.724 | -5.68  | 0.000674913 | 0.00997927 |
| 19960 | 10557459 | <a href="#">NM_011952</a>          | <a href="#">26417</a>  | mitogen-activated protein kina | <a href="#">Mapk3</a>         | 0.724 | -6.501 | 0.000294136 | 0.00565571 |
| 19961 | 10440099 | <a href="#">NM_018784</a>          | <a href="#">54613</a>  | ST3 beta-galactoside alpha-2,3 | <a href="#">St3gal6</a>       | 0.724 | -4.169 | 0.00392673  | 0.0344939  |
| 19962 | 10389680 | <a href="#">NM_054043</a>          | <a href="#">76626</a>  | Musashi homolog 2 (Drosophila) | <a href="#">Msi2</a>          | 0.724 | -4.568 | 0.00239031  | 0.024654   |
| 19963 | 10473976 | <a href="#">BC094315</a>           | <a href="#">241547</a> | RIKEN cDNA D230010M03 gene     | <a href="#">D230010M03Rik</a> | 0.724 | -4.98  | 0.00146751  | 0.0171053  |
| 19964 | 10473089 | <a href="#">NM_001080711</a>       | <a href="#">381375</a> | deafness, autosomal recessive  | <a href="#">Dfmb59</a>        | 0.723 | -3.059 | 0.01768     | 0.100778   |
| 19965 | 10383982 | <a href="#">NM_001080924</a>       | <a href="#">407821</a> | zinc and ring finger 3         | <a href="#">Zrf3</a>          | 0.723 | -4.946 | 0.00152573  | 0.0176188  |
| 19966 | 10559341 | <a href="#">ENSMUST00000105902</a> | <a href="#">210274</a> | SH3/ankyrin domain gene 2      | <a href="#">Shank2</a>        | 0.723 | -2.696 | 0.0299457   | 0.143448   |
| 19967 | 10553163 | <a href="#">NM_153057</a>          | <a href="#">211548</a> | nodal modulator 1              | <a href="#">Nomo1</a>         | 0.722 | -7.266 | 0.000144958 | 0.00352702 |
| 19968 | 10386604 | <a href="#">NM_009171</a>          | <a href="#">20425</a>  | serine hydroxymethyltransferas | <a href="#">Shmt1</a>         | 0.722 | -5.362 | 0.000952517 | 0.0126746  |
| 19969 | 10353034 | <a href="#">NR_004410</a>          | <a href="#">266793</a> | RNA, U87 small nucleolar       | <a href="#">Rnu87</a>         | 0.722 | -2.271 | 0.0562891   | 0.216807   |
| 19970 | 10586172 |                                    |                        |                                |                               | 0.722 | -0.969 | 0.363696    | 0.635063   |
| 19971 | 10598032 |                                    |                        |                                |                               | 0.722 | -2.151 | 0.0673657   | 0.242464   |
| 19972 | 10532892 | <a href="#">ENSMUST00000112160</a> | <a href="#">66236</a>  | RIKEN cDNA 1500011B03 gene     | <a href="#">1500011B03Rik</a> | 0.721 | -4.992 | 0.00144647  | 0.0169348  |
| 19973 | 10516765 | <a href="#">NM_172702</a>          | <a href="#">230779</a> | serine incorporator 2          | <a href="#">Serinc2</a>       | 0.721 | -5.704 | 0.000658154 | 0.0098277  |
| 19974 | 10462918 | <a href="#">NM_175507</a>          | <a href="#">240660</a> | transmembrane protein 20       | <a href="#">Tmem20</a>        | 0.721 | -3.378 | 0.0112814   | 0.0735307  |
| 19975 | 10430370 | <a href="#">XM_891575</a>          | <a href="#">626952</a> | predicted gene, EG626952       | <a href="#">EG626952</a>      | 0.721 | -3.928 | 0.00536052  | 0.043443   |
| 19976 | 10551803 | <a href="#">NM_001033355</a>       | <a href="#">243905</a> | zinc finger protein 568        | <a href="#">Zfp568</a>        | 0.721 | -6.044 | 0.000462327 | 0.00764304 |
| 19977 | 10503259 | <a href="#">NM_021897</a>          | <a href="#">60599</a>  | transformation related protein | <a href="#">Trp53inp1</a>     | 0.721 | -5.07  | 0.00132198  | 0.016024   |
| 19978 | 10419578 | <a href="#">NM_013864</a>          | <a href="#">29811</a>  | N-myc downstream regulated gen | <a href="#">Ndr2</a>          | 0.721 | -4.66  | 0.00213902  | 0.0228537  |
| 19979 | 10376201 | <a href="#">NM_001083929</a>       | <a href="#">14778</a>  | glutathione peroxidase 3       | <a href="#">Gpx3</a>          | 0.72  | -5.215 | 0.00112256  | 0.0142129  |
| 19980 | 10475324 | <a href="#">NM_009897</a>          | <a href="#">12716</a>  | creatine kinase, mitochondrial | <a href="#">Ckmt1</a>         | 0.72  | -5.544 | 0.00078116  | 0.0110457  |
| 19981 | 10489343 | <a href="#">ENSMUST00000114755</a> | <a href="#">30963</a>  | protein tyrosine phosphatase-1 | <a href="#">Ptpla</a>         | 0.72  | -2.647 | 0.0321949   | 0.150637   |
| 19982 | 10606436 | <a href="#">NM_016710</a>          | <a href="#">50887</a>  | nucleosome binding protein 1   | <a href="#">Nsbp1</a>         | 0.72  | -6.012 | 0.00047784  | 0.00783213 |
| 19983 | 10503659 | <a href="#">NM_010141</a>          | <a href="#">13841</a>  | Eph receptor A7                | <a href="#">Epha7</a>         | 0.72  | -2.15  | 0.0674764   | 0.242722   |
| 19984 | 10495826 | <a href="#">NM_024461</a>          | <a href="#">67704</a>  | RIKEN cDNA 1810037I17 gene     | <a href="#">1810037I17Rik</a> | 0.72  | -4.921 | 0.00157041  | 0.0180265  |
| 19985 | 10347103 | <a href="#">NM_026105</a>          | <a href="#">108147</a> | 5-aminoimidazole-4-            | <a href="#">Aric</a>          | 0.719 | -6.538 | 0.000283884 | 0.00551604 |

|       |          |                                    |                           |                                 |                                    |       |        |             |            |
|-------|----------|------------------------------------|---------------------------|---------------------------------|------------------------------------|-------|--------|-------------|------------|
| 19986 | 10396671 | <a href="#">NM_153804</a>          | <a href="#">263406</a>    | pleckstrin homology domain con  | <a href="#">Plekhh3</a>            | 0.719 | -3.91  | 0.0054927   | 0.0441924  |
| 19987 | 10531256 | <a href="#">ENSMUST00000088076</a> | <a href="#">100798</a>    | expressed sequence AU017193     | <a href="#">AU017193</a>           | 0.719 | -2.563 | 0.0364411   | 0.163209   |
| 19988 | 10512949 | <a href="#">NM_013454</a>          | <a href="#">11303</a>     | ATP-binding cassette, sub-fami  | <a href="#">Abca1</a>              | 0.719 | -4.139 | 0.00407902  | 0.0354634  |
| 19989 | 10585347 | <a href="#">BC115639</a>           | <a href="#">75311</a>     | RIKEN cDNA 4930550C14 gene      | <a href="#">4930550C14Rik</a>      | 0.719 | -3.261 | 0.0132732   | 0.0827874  |
| 19990 | 10494751 |                                    |                           |                                 |                                    | 0.719 | -6.166 | 0.000408793 | 0.00705019 |
| 19991 | 10423363 | <a href="#">NM_020332</a>          | <a href="#">11732</a>     | progressive ankylosis           | <a href="#">Ank</a>                | 0.719 | -2.893 | 0.0224652   | 0.118337   |
| 19992 | 10562181 | <a href="#">NM_017405</a>          | <a href="#">54135</a>     | lipolysis stimulated lipoprote  | <a href="#">Lsr</a>                | 0.719 | -6.379 | 0.000331088 | 0.00606651 |
| 19993 | 10571362 | <a href="#">NM_001039220</a>       | <a href="#">621080</a>    | expressed sequence A1429214     | <a href="#">A1429214</a>           | 0.719 | -3.637 | 0.00790513  | 0.0575176  |
| 19994 | 10516007 | <a href="#">NM_172700</a>          | <a href="#">230709</a>    | zinc metalloproteinase, STE24 h | <a href="#">Zmpste24</a>           | 0.719 | -5.251 | 0.00107822  | 0.0138505  |
| 19995 | 10416657 | <a href="#">NM_007920</a>          | <a href="#">13709</a>     | E74-like factor 1               | <a href="#">Elf1</a>               | 0.718 | -6.122 | 0.000427562 | 0.00726718 |
| 19996 | 10479698 | <a href="#">NM_008665</a>          | <a href="#">17932</a>     | myelin transcription factor 1   | <a href="#">Myt1</a>               | 0.718 | -3.585 | 0.00848484  | 0.0604052  |
| 19997 | 10595573 | <a href="#">NM_172926</a>          | <a href="#">244962</a>    | sorting nexin 14                | <a href="#">Snx14</a>              | 0.718 | -6.808 | 0.000219817 | 0.00469892 |
| 19998 | 10576569 | <a href="#">NM_145608</a>          | <a href="#">234878</a>    | cDNA sequence BC021891          | <a href="#">BC021891</a>           | 0.718 | -5.738 | 0.000635262 | 0.00959427 |
| 19999 | 10553413 | <a href="#">NM_133740</a>          | <a href="#">71974</a>     | protein arginine N-methyltrans  | <a href="#">Prmt3</a>              | 0.718 | -7.472 | 0.000121074 | 0.00314805 |
| 20000 | 10565018 | <a href="#">NM_016721</a>          | <a href="#">29875</a>     | IQ motif containing GTPase act  | <a href="#">Iqgap1</a>             | 0.718 | -4.857 | 0.0016918   | 0.018997   |
| 20001 | 10415332 | <a href="#">NM_020602</a>          | <a href="#">30759</a>     | REC8 homolog (yeast)            | <a href="#">Rec8</a>               | 0.718 | -4.812 | 0.00198352  | 0.0198283  |
| 20002 | 10519012 | <a href="#">NM_001112744</a>       | <a href="#">230972</a>    | Rho guanine nucleotide exchang  | <a href="#">Arhgef16</a>           | 0.718 | -3.844 | 0.00598702  | 0.0469024  |
| 20003 | 10604038 | <a href="#">NM_001081956</a>       | <a href="#">338351</a>    | splicing factor, arginine/seri  | <a href="#">Sfrs17b</a>            | 0.718 | -3.356 | 0.0116278   | 0.0752784  |
| 20004 | 10448307 | <a href="#">NM_013749</a>          | <a href="#">27279</a>     | tumor necrosis factor receptor  | <a href="#">Tnfrsf12a</a>          | 0.718 | -3.554 | 0.00884193  | 0.0621917  |
| 20005 | 10466304 | <a href="#">NM_172442</a>          | <a href="#">207521</a>    | deltex 4 homolog (Drosophila)   | <a href="#">Dtx4</a>               | 0.717 | -4.156 | 0.00399566  | 0.0349831  |
| 20006 | 10402994 | <a href="#">XM_975252</a>          | <a href="#">674110</a>    | similar to Ig heavy chain V re  | <a href="#">LOC674110</a>          | 0.717 | -1.627 | 0.146417    | 0.388184   |
| 20007 | 10524941 | <a href="#">NM_145564</a>          | <a href="#">231670</a>    | F-box protein 21                | <a href="#">Fbxo21</a>             | 0.717 | -6.469 | 0.000303225 | 0.00576563 |
| 20008 | 10583817 | <a href="#">NM_001082532</a>       | <a href="#">66268</a>     | phosphatidylinositol glycan an  | <a href="#">Pigyl</a>              | 0.717 | -5.674 | 0.000679256 | 0.0100365  |
| 20009 | 10549877 |                                    |                           |                                 |                                    | 0.717 | -4.337 | 0.00317562  | 0.0298423  |
| 20010 | 10504337 | <a href="#">NM_139305</a>          | <a href="#">230099</a>    | carbonic anhydrase 9            | <a href="#">Car9</a>               | 0.717 | -2.186 | 0.0639215   | 0.234849   |
| 20011 | 10554819 | <a href="#">NM_181407</a>          | <a href="#">109264</a>    | malic enzyme 3, NADP(+)-depend  | <a href="#">Me3</a>                | 0.717 | -3.653 | 0.00772892  | 0.0566947  |
| 20012 | 10451893 | <a href="#">NM_145934</a>          | <a href="#">106766</a>    | signal transducing adaptor fam  | <a href="#">Stap2</a>              | 0.717 | -4.695 | 0.00205203  | 0.0221255  |
| 20013 | 10547976 | <a href="#">NM_145391</a>          | <a href="#">213233</a>    | TAP binding protein-like        | <a href="#">Tapbpl</a>             | 0.716 | -4.452 | 0.00275372  | 0.0272715  |
| 20014 | 10514510 | <a href="#">NM_010008</a>          | <a href="#">13110</a>     | cytochrome P450, family 2, sub  | <a href="#">Cyp2j6</a>             | 0.716 | -4.897 | 0.00161439  | 0.0183915  |
| 20015 | 10368720 | <a href="#">NM_001114332</a>       | <a href="#">72472</a>     | solute carrier family 16 (mono  | <a href="#">Slc16a10</a>           | 0.716 | -6.114 | 0.000431044 | 0.00729643 |
| 20016 | 10552140 | <a href="#">NM_007678</a>          | <a href="#">12606</a>     | CCAAT/enhancer binding protein  | <a href="#">Cebpa</a>              | 0.716 | -4.501 | 0.00259359  | 0.0260765  |
| 20017 | 10378286 | <a href="#">NM_008399</a>          | <a href="#">16407</a>     | integrin, alpha E, epithelial-  | <a href="#">Itgae</a>              | 0.716 | -5.094 | 0.0012862   | 0.0158051  |
| 20018 | 10515425 |                                    |                           |                                 |                                    | 0.716 | -2.183 | 0.064194    | 0.235564   |
| 20019 | 10555323 | <a href="#">NM_177161</a>          | <a href="#">320452</a>    | procollagen-proline, 2-oxoglut  | <a href="#">P4ha3</a>              | 0.715 | -1.737 | 0.124734    | 0.353522   |
| 20020 | 10433656 | <a href="#">ENSMUST00000100178</a> | <a href="#">100038483</a> | predicted gene, ENSMUSG0000007  | <a href="#">ENSMUSG00000075401</a> | 0.715 | -6.466 | 0.000304113 | 0.00577733 |
| 20021 | 10587012 | <a href="#">NM_001114328</a>       | <a href="#">72278</a>     | cell cycle progression 1        | <a href="#">Ccp1</a>               | 0.715 | -7.076 | 0.00017184  | 0.00400153 |
| 20022 | 10503208 | <a href="#">NM_001081417</a>       | <a href="#">320790</a>    | chromodomain helicase DNA bind  | <a href="#">Chd7</a>               | 0.715 | -4.104 | 0.00427078  | 0.0365593  |
| 20023 | 10501734 | <a href="#">NM_023245</a>          | <a href="#">114301</a>    | palmdelphin                     | <a href="#">Palmd</a>              | 0.715 | -2.954 | 0.0205774   | 0.112161   |
| 20024 | 10396511 | <a href="#">NM_001005510</a>       | <a href="#">319565</a>    | synaptic nuclear envelope 2     | <a href="#">Syne2</a>              | 0.714 | -6.456 | 0.000307319 | 0.00580546 |
| 20025 | 10432190 | <a href="#">NM_007405</a>          | <a href="#">11512</a>     | adenylate cyclase 6             | <a href="#">Adcy6</a>              | 0.714 | -6.325 | 0.000349286 | 0.00627469 |
| 20026 | 10384670 |                                    |                           |                                 |                                    | 0.714 | -2.146 | 0.0678281   | 0.243316   |
| 20027 | 10589368 | <a href="#">NM_172775</a>          | <a href="#">235611</a>    | plexin B1                       | <a href="#">Plxnb1</a>             | 0.714 | -6.096 | 0.000438913 | 0.00738884 |
| 20028 | 10364784 | <a href="#">NM_139292</a>          | <a href="#">70335</a>     | receptor accessory protein 6    | <a href="#">Reep6</a>              | 0.714 | -7.674 | 0.000101826 | 0.00281072 |
| 20029 | 10502951 | <a href="#">NM_007382</a>          | <a href="#">11364</a>     | acyl-Coenzyme A dehydrogenase,  | <a href="#">Acadm</a>              | 0.713 | -7.307 | 0.00013985  | 0.00344063 |
| 20030 | 10575775 | <a href="#">ENSMUST00000039866</a> | <a href="#">74440</a>     | RIKEN cDNA 4933407C03 gene      | <a href="#">4933407C03Rik</a>      | 0.713 | -4.533 | 0.00249407  | 0.0253776  |
| 20031 | 10505008 | <a href="#">NM_133891</a>          | <a href="#">100434</a>    | solute carrier family 44, memb  | <a href="#">Slc44a1</a>            | 0.713 | -3.157 | 0.0153731   | 0.09206    |
| 20032 | 10452892 | <a href="#">NM_133747</a>          | <a href="#">72722</a>     | RIKEN cDNA 2810405J04 gene      | <a href="#">2810405J04Rik</a>      | 0.713 | -5.09  | 0.00129241  | 0.0158118  |
| 20033 | 10362672 | <a href="#">XM_986164</a>          | <a href="#">666342</a>    | predicted gene, EG666342        | <a href="#">EG666342</a>           | 0.713 | -2.996 | 0.0193725   | 0.107409   |
| 20034 | 10590830 | <a href="#">BC119072</a>           | <a href="#">234915</a>    | cDNA sequence AK129341          | <a href="#">AK129341</a>           | 0.713 | -4.044 | 0.00461044  | 0.0388379  |
| 20035 | 10488589 | <a href="#">NM_028666</a>          | <a href="#">73847</a>     | RIKEN cDNA 5430432M24 gene      | <a href="#">5430432M24Rik</a>      | 0.713 | -3.618 | 0.00810419  | 0.0585345  |

|       |          |                                    |                        |                                   |                                    |       |        |             |            |
|-------|----------|------------------------------------|------------------------|-----------------------------------|------------------------------------|-------|--------|-------------|------------|
| 20036 | 10383192 | <a href="#">ENSMUST00000093902</a> | <a href="#">672511</a> | hypothetical LOC672511            | <a href="#">LOC672511</a>          | 0.713 | -2.449 | 0.043156    | 0.182497   |
| 20037 | 10526241 | <a href="#">NM_009902</a>          | <a href="#">12739</a>  | claudin 3                         | <a href="#">Cldn3</a>              | 0.712 | -5.268 | 0.00105707  | 0.0136785  |
| 20038 | 10368011 | <a href="#">NM_025418</a>          | <a href="#">66201</a>  | Vps20-associated 1 homolog (S.    | <a href="#">Vta1</a>               | 0.712 | -4.877 | 0.00165373  | 0.0187387  |
| 20039 | 10472860 | <a href="#">NM_019688</a>          | <a href="#">56508</a>  | Rap guanine nucleotide exchang    | <a href="#">Rapgef4</a>            | 0.712 | -5.442 | 0.000872555 | 0.0119016  |
| 20040 | 10443131 | <a href="#">NM_080553</a>          | <a href="#">16440</a>  | inositol 1,4,5-triphosphate re    | <a href="#">Itp3</a>               | 0.712 | -7.232 | 0.000149509 | 0.00360048 |
| 20041 | 10403558 | <a href="#">NM_026184</a>          | <a href="#">67475</a>  | ERO1-like beta (S. cerevisiae)    | <a href="#">Ero1lb</a>             | 0.712 | -5.631 | 0.000711736 | 0.0103714  |
| 20042 | 10513143 | <a href="#">ENSMUST00000075637</a> | <a href="#">545622</a> | protein tyrosine phosphatase,     | <a href="#">Ptpn3</a>              | 0.712 | -2.798 | 0.0258198   | 0.130201   |
| 20043 | 10478924 | <a href="#">ENSMUST00000063891</a> | <a href="#">791354</a> | predicted gene,<br>ENSMUSG0000005 | <a href="#">ENSMUSG00000052368</a> | 0.712 | -4.018 | 0.00476882  | 0.0397916  |
| 20044 | 10408767 | <a href="#">NM_134060</a>          | <a href="#">108652</a> | solute carrier family 35, memb    | <a href="#">Slc35b3</a>            | 0.712 | -6.174 | 0.000405665 | 0.00700767 |
| 20045 | 10396237 | <a href="#">ENSMUST00000045907</a> | <a href="#">76967</a>  | RIKEN cDNA 2700049A03<br>gene     | <a href="#">2700049A03Rik</a>      | 0.711 | -6.288 | 0.000362158 | 0.00644567 |
| 20046 | 10583314 | <a href="#">BC056964</a>           | <a href="#">75316</a>  | Josephin domain containing 3      | <a href="#">Josd3</a>              | 0.711 | -6.126 | 0.000425617 | 0.00723994 |
| 20047 | 10538638 |                                    |                        |                                   |                                    | 0.711 | -3.001 | 0.0192177   | 0.106791   |
| 20048 | 10604922 | <a href="#">NM_001033328</a>       | <a href="#">236848</a> | cDNA sequence BC023829            | <a href="#">BC023829</a>           | 0.711 | -5.93  | 0.000519651 | 0.00829872 |
| 20049 | 10366630 | <a href="#">NM_026617</a>          | <a href="#">68212</a>  | transmembrane BAX inhibitor<br>mo | <a href="#">Tmbim4</a>             | 0.71  | -7.565 | 0.000111747 | 0.0030099  |
| 20050 | 10398344 |                                    |                        |                                   |                                    | 0.71  | -4.396 | 0.00295405  | 0.0284299  |
| 20051 | 10395932 | <a href="#">NM_146034</a>          | <a href="#">217615</a> | CTAGE family, member 5            | <a href="#">Ctage5</a>             | 0.71  | -6.697 | 0.000244017 | 0.00502386 |
| 20052 | 10491877 | <a href="#">NM_028667</a>          | <a href="#">73852</a>  | DNA segment, Chr 3, ERATO<br>Doi  | <a href="#">D3Ert751e</a>          | 0.71  | -2.443 | 0.0435595   | 0.18358    |
| 20053 | 10403112 | <a href="#">NM_010060</a>          | <a href="#">13411</a>  | dynein, axonemal, heavy chain     | <a href="#">Dnahe11</a>            | 0.71  | -5.293 | 0.00102809  | 0.0133936  |
| 20054 | 10365845 | <a href="#">NM_053072</a>          | <a href="#">13998</a>  | FYVE, RhoGEF and PH domain<br>con | <a href="#">Fgd6</a>               | 0.709 | -4.073 | 0.0044415   | 0.0376095  |
| 20055 | 10360764 | <a href="#">NM_010135</a>          | <a href="#">13800</a>  | enabled homolog (Drosophila)      | <a href="#">Enah</a>               | 0.709 | -8.168 | 6.76749e-05 | 0.00211667 |
| 20056 | 10438909 | <a href="#">XM_001480958</a>       | <a href="#">224088</a> | ATPase type 13A3                  | <a href="#">Atp13a3</a>            | 0.709 | -2.231 | 0.0597886   | 0.225222   |
| 20057 | 10482181 | <a href="#">NM_009261</a>          | <a href="#">20744</a>  | spermatid perinuclear RNA bind    | <a href="#">Strbp</a>              | 0.709 | -5.722 | 0.000645828 | 0.00969655 |
| 20058 | 10420591 |                                    |                        |                                   |                                    | 0.709 | -4.799 | 0.00181286  | 0.0200687  |
| 20059 | 10361926 | <a href="#">NM_008580</a>          | <a href="#">26408</a>  | mitogen-activated protein kina    | <a href="#">Map3k5</a>             | 0.709 | -4.783 | 0.00184756  | 0.0203462  |
| 20060 | 10568930 | <a href="#">NM_026928</a>          | <a href="#">69064</a>  | RIKEN cDNA 1810014F10 gene        | <a href="#">1810014F10Rik</a>      | 0.708 | -5.956 | 0.000506074 | 0.00816204 |
| 20061 | 10389005 | <a href="#">NM_183275</a>          | <a href="#">68550</a>  | RIKEN cDNA 1110002N22<br>gene     | <a href="#">1110002N22Rik</a>      | 0.708 | -6.684 | 0.00024695  | 0.00504981 |
| 20062 | 10476443 | <a href="#">NM_013829</a>          | <a href="#">18798</a>  | phospholipase C, beta 4           | <a href="#">Plec4</a>              | 0.707 | -2.285 | 0.0551473   | 0.214227   |
| 20063 | 10437236 | <a href="#">BC056174</a>           | <a href="#">245305</a> | predicted gene, EG245305          | <a href="#">EG245305</a>           | 0.707 | -3.095 | 0.016813    | 0.0976362  |
| 20064 | 10497209 | <a href="#">NM_025434</a>          | <a href="#">66230</a>  | mitochondrial ribosomal protei    | <a href="#">Mrps28</a>             | 0.707 | -5.945 | 0.000511642 | 0.00821424 |
| 20065 | 10570437 | <a href="#">NM_025785</a>          | <a href="#">66822</a>  | F-box protein 25                  | <a href="#">Fbxo25</a>             | 0.707 | -4.009 | 0.00482367  | 0.04017    |
| 20066 | 10416850 | <a href="#">NM_022886</a>          | <a href="#">64929</a>  | sciellin                          | <a href="#">Scel</a>               | 0.707 | -3.434 | 0.0104265   | 0.0699422  |
| 20067 | 10473058 | <a href="#">NM_145525</a>          | <a href="#">99031</a>  | oxysterol binding protein-like    | <a href="#">Osbp16</a>             | 0.707 | -3.39  | 0.0110898   | 0.0728453  |
| 20068 | 10442199 | <a href="#">NM_011760</a>          | <a href="#">22712</a>  | zinc finger protein 54            | <a href="#">Zfp54</a>              | 0.707 | -3.317 | 0.0122709   | 0.0779612  |
| 20069 | 10358027 | <a href="#">NM_007921</a>          | <a href="#">13710</a>  | E74-like factor 3                 | <a href="#">Elf3</a>               | 0.707 | -4.016 | 0.00478048  | 0.0398731  |
| 20070 | 10524955 | <a href="#">NM_021344</a>          | <a href="#">57816</a>  | tescalcin                         | <a href="#">Tesc</a>               | 0.707 | -3.679 | 0.00746764  | 0.055305   |
| 20071 | 10439206 |                                    |                        |                                   |                                    | 0.707 | -1.412 | 0.199687    | 0.461464   |
| 20072 | 10553324 | <a href="#">NM_026436</a>          | <a href="#">67893</a>  | transmembrane protein 86A         | <a href="#">Tmem86a</a>            | 0.707 | -6.583 | 0.00027191  | 0.00536314 |
| 20073 | 10513164 | <a href="#">ENSMUST00000075637</a> | <a href="#">545622</a> | protein tyrosine phosphatase,     | <a href="#">Ptpn3</a>              | 0.707 | -6.58  | 0.000272698 | 0.00536864 |
| 20074 | 10503168 | <a href="#">NM_001081417</a>       | <a href="#">320790</a> | chromodomain helicase DNA<br>bind | <a href="#">Chd7</a>               | 0.707 | -3.797 | 0.00637694  | 0.0490168  |
| 20075 | 10520842 | <a href="#">NM_181279</a>          | <a href="#">107976</a> | brain and reproductive organ-e    | <a href="#">Bre</a>                | 0.707 | -4.977 | 0.00147195  | 0.0171324  |
| 20076 | 10400023 | <a href="#">NM_025359</a>          | <a href="#">66109</a>  | tetraspanin 13                    | <a href="#">Tspan13</a>            | 0.706 | -5.043 | 0.00136467  | 0.0163668  |
| 20077 | 10425421 | <a href="#">NM_145986</a>          | <a href="#">213956</a> | expressed sequence AW544981       | <a href="#">AW544981</a>           | 0.706 | -3.068 | 0.0174536   | 0.0999022  |
| 20078 | 10439285 | <a href="#">AK133264</a>           | <a href="#">627962</a> | predicted gene, EG627962          | <a href="#">EG627962</a>           | 0.706 | -2.257 | 0.0575378   | 0.219758   |
| 20079 | 10600777 | <a href="#">ENSMUST00000088107</a> | <a href="#">385493</a> | expressed sequence AU015836       | <a href="#">AU015836</a>           | 0.706 | -4.626 | 0.00222887  | 0.0235165  |
| 20080 | 10491835 | <a href="#">NM_001040399</a>       | <a href="#">214048</a> | La ribonucleoprotein domain fa    | <a href="#">Larp2</a>              | 0.706 | -3.794 | 0.00639991  | 0.0491     |
| 20081 | 10561927 | <a href="#">NM_007467</a>          | <a href="#">11803</a>  | amyloid beta (A4) precursor-li    | <a href="#">Aplp1</a>              | 0.705 | -5.019 | 0.00140208  | 0.016658   |
| 20082 | 10532680 | <a href="#">NM_172718</a>          | <a href="#">52850</a>  | small G protein signaling modu    | <a href="#">Sgsm1</a>              | 0.705 | -7.757 | 9.4905e-05  | 0.00270806 |
| 20083 | 10503182 | <a href="#">NM_001081417</a>       | <a href="#">320790</a> | chromodomain helicase DNA<br>bind | <a href="#">Chd7</a>               | 0.705 | -2.566 | 0.0363053   | 0.162739   |
| 20084 | 10363669 | <a href="#">NM_013888</a>          | <a href="#">30045</a>  | DnaJ (Hsp40) homolog, subfamil    | <a href="#">Dnajc12</a>            | 0.705 | -7.622 | 0.000106427 | 0.00290359 |
| 20085 | 10548598 |                                    |                        |                                   |                                    | 0.705 | -3.748 | 0.00680307  | 0.0514096  |
| 20086 | 10464084 | <a href="#">NM_009333</a>          | <a href="#">21416</a>  | transcription factor 7-like 2     | <a href="#">Tcf7l2</a>             | 0.705 | -5.342 | 0.000974311 | 0.0128594  |

|       |          |                                    |                           |                                  |                               |       |        |             |            |
|-------|----------|------------------------------------|---------------------------|----------------------------------|-------------------------------|-------|--------|-------------|------------|
| 20087 | 10603814 | <a href="#">NM_177353</a>          | <a href="#">236727</a>    | solute carrier family 9 (sodium) | <a href="#">Slc9a7</a>        | 0.705 | -2.75  | 0.0276855   | 0.13614    |
| 20088 | 10556528 | <a href="#">NM_011055</a>          | <a href="#">18576</a>     | phosphodiesterase 3B, cGMP-inh   | <a href="#">Pde3b</a>         | 0.704 | -4.191 | 0.00381729  | 0.0337914  |
| 20089 | 10424086 | <a href="#">NM_172816</a>          | <a href="#">239436</a>    | solute carrier family 30 (zinc)  | <a href="#">Slc30a8</a>       | 0.704 | -3.067 | 0.0174868   | 0.0999956  |
| 20090 | 10422844 | <a href="#">NM_010275</a>          | <a href="#">14573</a>     | glial cell line derived neurot   | <a href="#">Gdnf</a>          | 0.704 | -5.55  | 0.00077585  | 0.0110024  |
| 20091 | 10427496 | <a href="#">NM_178748</a>          | <a href="#">268780</a>    | EGF-like, fibronectin type III   | <a href="#">Egflam</a>        | 0.704 | -3.975 | 0.00504302  | 0.0415985  |
| 20092 | 10387625 | <a href="#">NM_009601</a>          | <a href="#">11443</a>     | cholinergic receptor, nicotini   | <a href="#">Chrm1</a>         | 0.704 | -4.058 | 0.00452729  | 0.0382594  |
| 20093 | 10598091 |                                    |                           |                                  |                               | 0.703 | -5     | 0.00143282  | 0.0168502  |
| 20094 | 10517727 | <a href="#">NM_173427</a>          | <a href="#">242721</a>    | kelch domain containing 7A       | <a href="#">Klhd7a</a>        | 0.703 | -3.811 | 0.00625985  | 0.0483943  |
| 20095 | 10364056 | <a href="#">NM_008116</a>          | <a href="#">14598</a>     | gamma-glutamyltransferase 1      | <a href="#">Ggt1</a>          | 0.703 | -3.758 | 0.00671195  | 0.0509761  |
| 20096 | 10557177 | <a href="#">NM_008855</a>          | <a href="#">18751</a>     | protein kinase C, beta 1         | <a href="#">Prkcb1</a>        | 0.703 | -3.26  | 0.0133041   | 0.0828894  |
| 20097 | 10532896 | <a href="#">NM_181075</a>          | <a href="#">330173</a>    | RIKEN cDNA 2610524H06 gene       | <a href="#">2610524H06Rik</a> | 0.703 | -5.558 | 0.000769619 | 0.0109508  |
| 20098 | 10501555 | <a href="#">NM_007446</a>          | <a href="#">11722</a>     | amylase 1, salivary              | <a href="#">Amy1</a>          | 0.703 | -4.939 | 0.00153863  | 0.0177387  |
| 20099 | 10427235 | <a href="#">NM_025385</a>          | <a href="#">66151</a>     | proline rich 13                  | <a href="#">Prr13</a>         | 0.703 | -4.402 | 0.00292858  | 0.0283136  |
| 20100 | 10439114 | <a href="#">NM_178378</a>          | <a href="#">69707</a>     | IQ motif containing G            | <a href="#">Iqcg</a>          | 0.702 | -2.763 | 0.0271627   | 0.134251   |
| 20101 | 10352576 | <a href="#">NM_011935</a>          | <a href="#">26381</a>     | estrogen-related receptor gamm   | <a href="#">Esrrg</a>         | 0.702 | -2.789 | 0.0261439   | 0.130964   |
| 20102 | 10525829 |                                    |                           |                                  |                               | 0.702 | -3.242 | 0.0136451   | 0.0843112  |
| 20103 | 10454651 |                                    |                           |                                  |                               | 0.702 | -3.024 | 0.018603    | 0.104445   |
| 20104 | 10367221 | <a href="#">NM_133997</a>          | <a href="#">103161</a>    | apolipoprotein F                 | <a href="#">ApoF</a>          | 0.702 | -4.584 | 0.00234461  | 0.024337   |
| 20105 | 10472933 | <a href="#">NM_029022</a>          | <a href="#">74616</a>     | secernin 3                       | <a href="#">Scrn3</a>         | 0.702 | -5.179 | 0.00116899  | 0.0147079  |
| 20106 | 10356968 | <a href="#">NM_013626</a>          | <a href="#">18484</a>     | peptidylglycine alpha-amidatin   | <a href="#">Pam</a>           | 0.702 | -5.336 | 0.000981019 | 0.0129238  |
| 20107 | 10366266 | <a href="#">NM_054056</a>          | <a href="#">114774</a>    | PRKC, apoptosis, WT1, regulato   | <a href="#">Pawr</a>          | 0.701 | -3.757 | 0.0067263   | 0.0510347  |
| 20108 | 10401630 | <a href="#">NM_025421</a>          | <a href="#">66204</a>     | acylphosphatase 1, erythrocyte   | <a href="#">Acypl1</a>        | 0.701 | -4.234 | 0.00361711  | 0.0326002  |
| 20109 | 10437483 | <a href="#">NM_133185</a>          | <a href="#">66049</a>     | rogdi homolog (Drosophila)       | <a href="#">Rogdi</a>         | 0.701 | -5.616 | 0.000722568 | 0.0104931  |
| 20110 | 10344801 | <a href="#">NM_026493</a>          | <a href="#">211660</a>    | centrosome and spindle pole as   | <a href="#">Cspp1</a>         | 0.701 | -4.34  | 0.00316676  | 0.0298116  |
| 20111 | 10576639 | <a href="#">NM_008737</a>          | <a href="#">18186</a>     | neuropilin 1                     | <a href="#">Nrp1</a>          | 0.701 | -5.573 | 0.000757187 | 0.0108175  |
| 20112 | 10503176 | <a href="#">NM_001081417</a>       | <a href="#">320790</a>    | chromodomain helicase DNA bind   | <a href="#">Chd7</a>          | 0.701 | -2.882 | 0.022843    | 0.119939   |
| 20113 | 10414093 | <a href="#">NM_008133</a>          | <a href="#">14661</a>     | glutamate dehydrogenase 1        | <a href="#">Glud1</a>         | 0.701 | -5.576 | 0.00075498  | 0.0108152  |
| 20114 | 10365136 | <a href="#">NM_010347</a>          | <a href="#">14797</a>     | amino-terminal enhancer of spl   | <a href="#">Aes</a>           | 0.701 | -7.187 | 0.00015559  | 0.00371308 |
| 20115 | 10383198 | <a href="#">ENSMUST00000093902</a> | <a href="#">672511</a>    | hypothetical LOC672511           | <a href="#">LOC672511</a>     | 0.701 | -2.972 | 0.020038    | 0.109926   |
| 20116 | 10603316 | <a href="#">AF038507</a>           | <a href="#">68355</a>     | RIKEN cDNA 2010204K13 gene       | <a href="#">2010204K13Rik</a> | 0.7   | -5.681 | 0.000674646 | 0.00997927 |
| 20117 | 10604661 | <a href="#">XM_001478226</a>       | <a href="#">100047705</a> | similar to Atf1 protein          | <a href="#">LOC100047705</a>  | 0.7   | -3.435 | 0.0104197   | 0.0699412  |
| 20118 | 10394082 | <a href="#">BC024349</a>           | <a href="#">66179</a>     | RIKEN cDNA 1110031I02 gene       | <a href="#">1110031I02Rik</a> | 0.7   | -7.457 | 0.000122626 | 0.00316968 |
| 20119 | 10545130 | <a href="#">NM_007836</a>          | <a href="#">13197</a>     | growth arrest and DNA-damage-i   | <a href="#">Gadd45a</a>       | 0.7   | -2.066 | 0.0764439   | 0.262093   |
| 20120 | 10439732 | <a href="#">ENSMUST00000089478</a> | <a href="#">433022</a>    | phosphatidylinositol-specific    | <a href="#">Plexd2</a>        | 0.7   | -5.169 | 0.00118201  | 0.0148235  |
| 20121 | 10576610 | <a href="#">NM_033620</a>          | <a href="#">93742</a>     | par-3 (partitioning defective    | <a href="#">Pard3</a>         | 0.699 | -6.478 | 0.000300806 | 0.00574459 |
| 20122 | 10516932 | <a href="#">NM_144907</a>          | <a href="#">230784</a>    | sestrin 2                        | <a href="#">Sesn2</a>         | 0.699 | -4.389 | 0.00297884  | 0.0286164  |
| 20123 | 10530467 | <a href="#">NM_133921</a>          | <a href="#">100978</a>    | nuclear transcription factor,    | <a href="#">Nfxl1</a>         | 0.699 | -5.015 | 0.00140801  | 0.0166877  |
| 20124 | 10373577 | <a href="#">NM_024180</a>          | <a href="#">66844</a>     | ORM1-like 2 (S. cerevisiae)      | <a href="#">Ormdl2</a>        | 0.698 | -5.573 | 0.0007569   | 0.0108175  |
| 20125 | 10425257 | <a href="#">NM_027231</a>          | <a href="#">69833</a>     | polymerase (RNA) II (DNA direc   | <a href="#">Polr2f</a>        | 0.698 | -4.364 | 0.00307049  | 0.0291524  |
| 20126 | 10587262 | <a href="#">NM_172925</a>          | <a href="#">244923</a>    | kelch-like 31 (Drosophila)       | <a href="#">Klhl31</a>        | 0.698 | -6.224 | 0.000385754 | 0.00675756 |
| 20127 | 10369844 | <a href="#">NM_031397</a>          | <a href="#">83675</a>     | bicaudal C homolog 1 (Drosophi   | <a href="#">Bicc1</a>         | 0.698 | -3.518 | 0.00929218  | 0.0644811  |
| 20128 | 10447167 | <a href="#">NM_054082</a>          | <a href="#">116871</a>    | metastasis associated 3          | <a href="#">Mta3</a>          | 0.698 | -5.561 | 0.000767278 | 0.0109248  |
| 20129 | 10490815 | <a href="#">XR_031642</a>          | <a href="#">545500</a>    | similar to ubiquitin specific    | <a href="#">LOC545500</a>     | 0.698 | -2.131 | 0.0694576   | 0.246984   |
| 20130 | 10547471 | <a href="#">NM_198884</a>          | <a href="#">330406</a>    | beta-1,4-N-acetyl-galactosamin   | <a href="#">B4galnt3</a>      | 0.698 | -4.21  | 0.00372672  | 0.0332773  |
| 20131 | 10375667 | <a href="#">NM_021540</a>          | <a href="#">59044</a>     | ring finger protein 130          | <a href="#">Rnf130</a>        | 0.698 | -6.751 | 0.000231804 | 0.00486719 |
| 20132 | 10401891 | <a href="#">NM_175367</a>          | <a href="#">108800</a>    | stonin 2                         | <a href="#">Ston2</a>         | 0.697 | -6.555 | 0.000279192 | 0.00544077 |
| 20133 | 10453636 | <a href="#">NM_153153</a>          | <a href="#">225115</a>    | supervillin                      | <a href="#">Svil</a>          | 0.697 | -2.568 | 0.0361689   | 0.162368   |
| 20134 | 10478540 | <a href="#">NM_001039501</a>       | <a href="#">629756</a>    | WAP four-disulfide core domain   | <a href="#">Wfdc10</a>        | 0.697 | -4.521 | 0.0025326   | 0.0256417  |
| 20135 | 10476728 | <a href="#">NM_025314</a>          | <a href="#">66044</a>     | D-tyrosyl-tRNA deacylase 1 hom   | <a href="#">Dtd1</a>          | 0.697 | -6.713 | 0.000240296 | 0.00499098 |
| 20136 | 10389581 | <a href="#">NM_001005341</a>       | <a href="#">77864</a>     | yippee-like 2 (Drosophila)       | <a href="#">Ypel2</a>         | 0.697 | -5.548 | 0.00077546  | 0.0110191  |

|       |          |                                    |                           |                                |                               |       |        |             |            |
|-------|----------|------------------------------------|---------------------------|--------------------------------|-------------------------------|-------|--------|-------------|------------|
| 20137 | 10409240 | <a href="#">NM_013660</a>          | <a href="#">20354</a>     | sema domain, immunoglobulin do | <a href="#">Sema4d</a>        | 0.697 | -7.386 | 0.000130517 | 0.00329708 |
| 20138 | 10558134 | <a href="#">NM_133942</a>          | <a href="#">101476</a>    | pleckstrin homology domain con | <a href="#">Plekha1</a>       | 0.697 | -4.476 | 0.00267435  | 0.0266854  |
| 20139 | 10398693 | <a href="#">AF357387</a>           | <a href="#">217869</a>    | eukaryotic translation initiat | <a href="#">Eif5</a>          | 0.696 | -3.207 | 0.014337    | 0.0874613  |
| 20140 | 10396270 | <a href="#">NM_021532</a>          | <a href="#">59036</a>     | dapper homolog 1, antagonist o | <a href="#">Dact1</a>         | 0.695 | -3.543 | 0.00897821  | 0.0628593  |
| 20141 | 10441753 | <a href="#">NM_008877</a>          | <a href="#">18815</a>     | plasminogen                    | <a href="#">Plg</a>           | 0.695 | -6.578 | 0.00027317  | 0.00537028 |
| 20142 | 10578155 |                                    |                           |                                |                               | 0.695 | -3.283 | 0.0128827   | 0.0809488  |
| 20143 | 10420131 | <a href="#">NM_019519</a>          | <a href="#">56187</a>     | Rab geranylgeranyl transferase | <a href="#">Rabggt</a>        | 0.695 | -7.043 | 0.000177136 | 0.00407992 |
| 20144 | 10389699 |                                    |                           |                                |                               | 0.695 | -2.066 | 0.0765239   | 0.26224    |
| 20145 | 10371332 | <a href="#">NM_153543</a>          | <a href="#">216188</a>    | aldehyde dehydrogenase 1 famil | <a href="#">Aldh1l2</a>       | 0.695 | -5.01  | 0.0014168   | 0.0167544  |
| 20146 | 10373826 | <a href="#">NM_016922</a>          | <a href="#">53897</a>     | galactose-3-O-sulfotransferase | <a href="#">Gal3st1</a>       | 0.695 | -3.602 | 0.00828772  | 0.0593818  |
| 20147 | 10601328 | <a href="#">NM_001081189</a>       | <a href="#">331487</a>    | uracil phosphoribosyltransfera | <a href="#">Uppt</a>          | 0.695 | -5.259 | 0.00106765  | 0.0137397  |
| 20148 | 10361790 | <a href="#">NM_025799</a>          | <a href="#">66848</a>     | fucosidase, alpha-L- 2, plasma | <a href="#">Fuca2</a>         | 0.695 | -5.413 | 0.000900322 | 0.0121483  |
| 20149 | 10490302 | <a href="#">ENSMUST00000108923</a> | <a href="#">353208</a>    | RIKEN cDNA 2810021G02 gene     | <a href="#">2810021G02Rik</a> | 0.695 | -1.83  | 0.108717    | 0.325457   |
| 20150 | 10506571 | <a href="#">NM_053272</a>          | <a href="#">74754</a>     | 24-dehydrocholesterol reductas | <a href="#">Dhcr24</a>        | 0.695 | -4.116 | 0.00420339  | 0.0361433  |
| 20151 | 10362069 | <a href="#">ENSMUST00000071008</a> | <a href="#">432436</a>    | predicted gene, EG432436       | <a href="#">EG432436</a>      | 0.694 | -4.918 | 0.00157633  | 0.0180846  |
| 20152 | 10352815 | <a href="#">NM_016851</a>          | <a href="#">54139</a>     | interferon regulatory factor 6 | <a href="#">Irf6</a>          | 0.694 | -7.301 | 0.00014063  | 0.00344552 |
| 20153 | 10398358 |                                    |                           |                                |                               | 0.694 | -2.011 | 0.083057    | 0.276162   |
| 20154 | 10450197 | <a href="#">NR_004051</a>          | <a href="#">81497</a>     | butyrophilin-like 5            | <a href="#">Btnl5</a>         | 0.694 | -1.771 | 0.118633    | 0.343944   |
| 20155 | 10416793 | <a href="#">NM_016723</a>          | <a href="#">50933</a>     | ubiquitin carboxyl-terminal es | <a href="#">Uchl3</a>         | 0.694 | -6.465 | 0.000304645 | 0.00578223 |
| 20156 | 10490724 | <a href="#">NM_172676</a>          | <a href="#">229011</a>    | sterile alpha motif domain con | <a href="#">Samd10</a>        | 0.694 | -5.513 | 0.000807777 | 0.0113035  |
| 20157 | 10366376 | <a href="#">NM_178278</a>          | <a href="#">353025</a>    | calcyphosphine 2               | <a href="#">Casp2</a>         | 0.694 | -3.761 | 0.00668904  | 0.0508569  |
| 20158 | 10546706 | <a href="#">NM_019743</a>          | <a href="#">56353</a>     | RING1 and YY1 binding protein  | <a href="#">Rybp</a>          | 0.694 | -2.517 | 0.0390189   | 0.171165   |
| 20159 | 10447056 | <a href="#">NM_027455</a>          | <a href="#">70536</a>     | glutaminy-peptide cyclotransf  | <a href="#">Qpct</a>          | 0.694 | -3.617 | 0.00811458  | 0.0585528  |
| 20160 | 10508887 | <a href="#">NM_011850</a>          | <a href="#">23957</a>     | nuclear receptor subfamily 0,  | <a href="#">Nr0b2</a>         | 0.693 | -6.565 | 0.000276456 | 0.00540246 |
| 20161 | 10575616 | <a href="#">AK134873</a>           | <a href="#">93739</a>     | gamma-aminobutyric acid (GABA- | <a href="#">Gabarapl2</a>     | 0.693 | -2.739 | 0.0281477   | 0.137618   |
| 20162 | 10359034 | <a href="#">NM_001024945</a>       | <a href="#">104009</a>    | quiescin Q6 sulfhydryl oxidase | <a href="#">Qsox1</a>         | 0.693 | -3.6   | 0.00830685  | 0.0594584  |
| 20163 | 10463729 |                                    |                           |                                |                               | 0.693 | -3.499 | 0.00954475  | 0.0657453  |
| 20164 | 10390640 | <a href="#">NM_011771</a>          | <a href="#">22780</a>     | IKAROS family zinc finger 3    | <a href="#">Ikzf3</a>         | 0.693 | -4.621 | 0.00224212  | 0.0236267  |
| 20165 | 10569149 | <a href="#">NM_177280</a>          | <a href="#">320871</a>    | RIKEN cDNA B230206H07 gene     | <a href="#">B230206H07Rik</a> | 0.693 | -5.929 | 0.000520527 | 0.00830643 |
| 20166 | 10585978 |                                    |                           |                                |                               | 0.693 | -3.003 | 0.0191732   | 0.106655   |
| 20167 | 10587023 | <a href="#">NM_023635</a>          | <a href="#">11891</a>     | RAB27A, member RAS oncogene fa | <a href="#">Rab27a</a>        | 0.692 | -3.921 | 0.00541417  | 0.0437454  |
| 20168 | 10580955 |                                    |                           |                                |                               | 0.692 | -4.124 | 0.00416161  | 0.0359141  |
| 20169 | 10393166 | <a href="#">NM_009180</a>          | <a href="#">20446</a>     | ST6 (alpha-N-acetyl-neuraminyl | <a href="#">St6galnac2</a>    | 0.692 | -3.802 | 0.00633688  | 0.0488424  |
| 20170 | 10505917 | <a href="#">XR_033774</a>          | <a href="#">664840</a>    | similar to hCG1640785          | <a href="#">LOC664840</a>     | 0.692 | -1.83  | 0.108648    | 0.325457   |
| 20171 | 10406881 | <a href="#">NM_011420</a>          | <a href="#">20595</a>     | survival motor neuron 1        | <a href="#">Smn1</a>          | 0.692 | -3.968 | 0.00508783  | 0.0417938  |
| 20172 | 10416800 | <a href="#">NM_201529</a>          | <a href="#">380928</a>    | LIM domain only 7              | <a href="#">Lmo7</a>          | 0.691 | -2.781 | 0.0264365   | 0.13202    |
| 20173 | 10481056 | <a href="#">NM_008714</a>          | <a href="#">18128</a>     | Notch gene homolog 1 (Drosophi | <a href="#">Notch1</a>        | 0.691 | -7.677 | 0.000101538 | 0.0028101  |
| 20174 | 10569057 | <a href="#">NM_145135</a>          | <a href="#">107702</a>    | ribonuclease/angiogenin inhibi | <a href="#">Rnh1</a>          | 0.691 | -6.245 | 0.000378056 | 0.00663376 |
| 20175 | 10388238 | <a href="#">NM_025318</a>          | <a href="#">66048</a>     | transmembrane protein 93       | <a href="#">Tmem93</a>        | 0.691 | -5.887 | 0.000543678 | 0.00859115 |
| 20176 | 10511429 | <a href="#">NM_007592</a>          | <a href="#">12319</a>     | carbonic anhydrase 8           | <a href="#">Car8</a>          | 0.691 | -7.738 | 9.64561e-05 | 0.00272292 |
| 20177 | 10422512 | <a href="#">BC006662</a>           | <a href="#">223267</a>    | cDNA sequence BC006662         | <a href="#">BC006662</a>      | 0.691 | -5.177 | 0.00117071  | 0.0147079  |
| 20178 | 10390209 | <a href="#">NM_009951</a>          | <a href="#">140486</a>    | insulin-like growth factor 2 m | <a href="#">Igf2bp1</a>       | 0.691 | -4.154 | 0.00400326  | 0.0350352  |
| 20179 | 10421648 | <a href="#">NM_026232</a>          | <a href="#">67554</a>     | solute carrier family 25, memb | <a href="#">Slc25a30</a>      | 0.691 | -6.419 | 0.000318527 | 0.00592342 |
| 20180 | 10601459 | <a href="#">NM_008901</a>          | <a href="#">18994</a>     | POU domain, class 3, transcrip | <a href="#">Pou3f4</a>        | 0.69  | -6.379 | 0.000331243 | 0.00606651 |
| 20181 | 10562117 | <a href="#">NM_146187</a>          | <a href="#">233079</a>    | free fatty acid receptor 2     | <a href="#">Ffar2</a>         | 0.69  | -3.263 | 0.0132339   | 0.0826153  |
| 20182 | 10357472 | <a href="#">NM_009911</a>          | <a href="#">12767</a>     | chemokine (C-X-C motif) recept | <a href="#">Cxcr4</a>         | 0.69  | -4.959 | 0.00150353  | 0.0174291  |
| 20183 | 10602253 |                                    |                           |                                |                               | 0.69  | -3.554 | 0.00884097  | 0.0621917  |
| 20184 | 10502205 | <a href="#">NM_008212</a>          | <a href="#">15107</a>     | hydroxyacyl-Coenzyme A dehydro | <a href="#">Hadh</a>          | 0.689 | -6.386 | 0.000328953 | 0.00605343 |
| 20185 | 10497590 | <a href="#">NM_007963</a>          | <a href="#">14013</a>     | ecotropic viral integration si | <a href="#">Evi1</a>          | 0.689 | -2.686 | 0.0304183   | 0.145086   |
| 20186 | 10452980 | <a href="#">NM_011163</a>          | <a href="#">19106</a>     | eukaryotic translation initiat | <a href="#">Eif2ak2</a>       | 0.689 | -3.691 | 0.00734944  | 0.0545959  |
| 20187 | 10598664 | <a href="#">NM_027439</a>          | <a href="#">70495</a>     | ATPase, H+ transporting, lysos | <a href="#">Atp6ap2</a>       | 0.689 | -4.239 | 0.00359449  | 0.0324929  |
| 20188 | 10513536 | <a href="#">XM_001472530</a>       | <a href="#">100039345</a> | hypothetical protein LOC100039 | <a href="#">LOC100039345</a>  | 0.688 | -2.865 | 0.0233907   | 0.121516   |

|       |          |                                    |                        |                                 |                               |       |        |             |            |
|-------|----------|------------------------------------|------------------------|---------------------------------|-------------------------------|-------|--------|-------------|------------|
| 20189 | 10431915 | <a href="#">NM_027052</a>          | <a href="#">69354</a>  | solute carrier family 38, memb  | <a href="#">Slc38a4</a>       | 0.688 | -5.093 | 0.00128884  | 0.0158118  |
| 20190 | 10467560 | <a href="#">NM_133352</a>          | <a href="#">107358</a> | transmembrane 9 superfamily me  | <a href="#">Tm9sf3</a>        | 0.688 | -6.611 | 0.000264604 | 0.00528661 |
| 20191 | 10501879 | <a href="#">NM_133857</a>          | <a href="#">99526</a>  | ubiquitin specific peptidase 5  | <a href="#">Usp53</a>         | 0.688 | -3.608 | 0.0082177   | 0.059041   |
| 20192 | 10438460 | <a href="#">NM_001005767</a>       | <a href="#">381038</a> | presenilin associated, rhomboid | <a href="#">Parl</a>          | 0.687 | -6.131 | 0.000423627 | 0.00721493 |
| 20193 | 10579894 | <a href="#">NM_020259</a>          | <a href="#">15245</a>  | Hedgehog-interacting protein    | <a href="#">Hhip</a>          | 0.687 | -3.25  | 0.0134889   | 0.0836635  |
| 20194 | 10479925 | <a href="#">BC025867</a>           | <a href="#">227545</a> | RIKEN cDNA 5430407P10 gene      | <a href="#">5430407P10Rik</a> | 0.687 | -4.418 | 0.00287276  | 0.0280221  |
| 20195 | 10410877 | <a href="#">NM_001081176</a>       | <a href="#">67486</a>  | polymerase (RNA) III (DNA dire  | <a href="#">Polr3g</a>        | 0.687 | -4.917 | 0.00157813  | 0.0180955  |
| 20196 | 10502273 | <a href="#">ENSMUST00000054105</a> | <a href="#">319825</a> | RIKEN cDNA D630013G24 gene      | <a href="#">D630013G24Rik</a> | 0.686 | -6.675 | 0.000249067 | 0.00508328 |
| 20197 | 10571353 | <a href="#">BC052184</a>           | <a href="#">319582</a> | RIKEN cDNA 6430573F11 gene      | <a href="#">6430573F11Rik</a> | 0.686 | -6.194 | 0.000397545 | 0.00690123 |
| 20198 | 10520527 | <a href="#">NM_023047</a>          | <a href="#">65254</a>  | dihydropyrimidinase-like 5      | <a href="#">Dpysl5</a>        | 0.686 | -5.05  | 0.00135341  | 0.0162964  |
| 20199 | 10478474 | <a href="#">NM_009036</a>          | <a href="#">19668</a>  | recombination signal binding p  | <a href="#">Rbpjl</a>         | 0.686 | -5.649 | 0.000698096 | 0.0102382  |
| 20200 | 10523891 | <a href="#">NR_003639</a>          | <a href="#">73318</a>  | RIKEN cDNA 1700013N18 gene      | <a href="#">1700013N18Rik</a> | 0.686 | -4.777 | 0.00186065  | 0.0204585  |
| 20201 | 10555118 | <a href="#">NM_011035</a>          | <a href="#">18479</a>  | p21 (CDKN1A)-activated kinase   | <a href="#">Pak1</a>          | 0.686 | -6.543 | 0.000282581 | 0.00549668 |
| 20202 | 10585980 |                                    |                        |                                 |                               | 0.686 | -3.361 | 0.01154     | 0.0749094  |
| 20203 | 10500610 | <a href="#">BC120717</a>           | <a href="#">74645</a>  | RIKEN cDNA 4930431B09 gene      | <a href="#">4930431B09Rik</a> | 0.686 | -3.567 | 0.00868877  | 0.0613817  |
| 20204 | 10511496 | <a href="#">XR_001926</a>          | <a href="#">666840</a> | similar to Ldha protein         | <a href="#">LOC666840</a>     | 0.686 | -2.409 | 0.0458627   | 0.189807   |
| 20205 | 10562125 | <a href="#">NM_001033316</a>       | <a href="#">233080</a> | free fatty acid receptor 3      | <a href="#">Ffar3</a>         | 0.686 | -3.454 | 0.0101423   | 0.0686695  |
| 20206 | 10408331 | <a href="#">NM_025790</a>          | <a href="#">66834</a>  | thioesterase superfamily membe  | <a href="#">Them2</a>         | 0.685 | -4.531 | 0.00249941  | 0.0254055  |
| 20207 | 10606864 | <a href="#">NM_177919</a>          | <a href="#">331532</a> | transcription elongation facto  | <a href="#">Tceal5</a>        | 0.685 | -4.987 | 0.00145558  | 0.0170037  |
| 20208 | 10373388 | <a href="#">NM_027257</a>          | <a href="#">69917</a>  | oligonucleotide/oligosaccharid  | <a href="#">Obfc2b</a>        | 0.685 | -5.12  | 0.00124961  | 0.0154515  |
| 20209 | 10456719 |                                    |                        |                                 |                               | 0.685 | -2.272 | 0.0561843   | 0.216663   |
| 20210 | 10553935 | <a href="#">NM_172310</a>          | <a href="#">272396</a> | threonyl-tRNA synthetase-like   | <a href="#">Tarsl2</a>        | 0.685 | -6.26  | 0.000372468 | 0.00657916 |
| 20211 | 10480601 | <a href="#">BC013092</a>           | <a href="#">227612</a> | RIKEN cDNA A830007P12 gene      | <a href="#">A830007P12Rik</a> | 0.685 | -8.234 | 6.4165e-05  | 0.00205873 |
| 20212 | 10471424 | <a href="#">NM_153560</a>          | <a href="#">98952</a>  | RIKEN cDNA C230093N12 gene      | <a href="#">C230093N12Rik</a> | 0.685 | -6.533 | 0.000285064 | 0.00552972 |
| 20213 | 10443764 | <a href="#">NM_153062</a>          | <a href="#">224674</a> | solute carrier family 37 (glyc  | <a href="#">Slc37a1</a>       | 0.685 | -5.628 | 0.000713922 | 0.0103961  |
| 20214 | 10384656 | <a href="#">NM_016888</a>          | <a href="#">53625</a>  | UDP-GlcNAc:betaGal beta-1,3-N-  | <a href="#">B3gnt2</a>        | 0.685 | -5.681 | 0.00067443  | 0.00997927 |
| 20215 | 10498345 | <a href="#">NM_173398</a>          | <a href="#">229323</a> | G protein-coupled receptor 171  | <a href="#">Gpr171</a>        | 0.684 | -4.323 | 0.00323505  | 0.0301509  |
| 20216 | 10476512 | <a href="#">NM_011428</a>          | <a href="#">20614</a>  | synaptosomal-associated protei  | <a href="#">Snap25</a>        | 0.684 | -7.072 | 0.000172585 | 0.00401446 |
| 20217 | 10449258 | <a href="#">NM_008113</a>          | <a href="#">14570</a>  | Rho GDP dissociation inhibitor  | <a href="#">Arhgdig</a>       | 0.684 | -5.256 | 0.00107197  | 0.0137798  |
| 20218 | 10543530 | <a href="#">NM_011038</a>          | <a href="#">18506</a>  | paired box gene 4               | <a href="#">Pax4</a>          | 0.684 | -2.74  | 0.0280725   | 0.137495   |
| 20219 | 10412380 |                                    |                        |                                 |                               | 0.684 | -3.875 | 0.0057493   | 0.0455805  |
| 20220 | 10345442 | <a href="#">NM_015818</a>          | <a href="#">50785</a>  | heparan sulfate 6-O-sulfotrans  | <a href="#">Hs6st1</a>        | 0.684 | -5.479 | 0.000838407 | 0.0115713  |
| 20221 | 10447097 | <a href="#">NM_026053</a>          | <a href="#">67242</a>  | gem (nuclear organelle) associ  | <a href="#">Gemin6</a>        | 0.683 | -6.091 | 0.000440935 | 0.00740801 |
| 20222 | 10406817 | <a href="#">NM_007930</a>          | <a href="#">13803</a>  | ectodermal-neural cortex 1      | <a href="#">Enc1</a>          | 0.683 | -5.828 | 0.000577754 | 0.00896919 |
| 20223 | 10578136 |                                    |                        |                                 |                               | 0.683 | -1.112 | 0.301969    | 0.578022   |
| 20224 | 10544417 | <a href="#">NM_023580</a>          | <a href="#">13835</a>  | Eph receptor A1                 | <a href="#">Epha1</a>         | 0.683 | -6.522 | 0.000288241 | 0.00558005 |
| 20225 | 10485955 | <a href="#">NM_009162</a>          | <a href="#">20394</a>  | secretogranin V                 | <a href="#">Scg5</a>          | 0.683 | -4.999 | 0.0014346   | 0.0168502  |
| 20226 | 10512892 | <a href="#">DQ469311</a>           | <a href="#">230161</a> | novel protein similar to bile   | <a href="#">RP23-34B24.1</a>  | 0.683 | -4.329 | 0.00321087  | 0.0300343  |
| 20227 | 10523727 | <a href="#">NM_008861</a>          | <a href="#">18764</a>  | polycystic kidney disease 2     | <a href="#">Pkd2</a>          | 0.682 | -5.483 | 0.000834615 | 0.0115341  |
| 20228 | 10594762 | <a href="#">BC025646</a>           | <a href="#">76886</a>  | RIKEN cDNA 6430514L14 gene      | <a href="#">6430514L14Rik</a> | 0.682 | -3.242 | 0.0136379   | 0.084307   |
| 20229 | 10510413 | <a href="#">NM_001085505</a>       | <a href="#">230909</a> | gene model 572, (NCBI)          | <a href="#">Gm572</a>         | 0.682 | -6.697 | 0.00024385  | 0.00502386 |
| 20230 | 10349904 | <a href="#">NM_026680</a>          | <a href="#">68338</a>  | golgi transport 1 homolog A (S  | <a href="#">Golt1a</a>        | 0.682 | -2.525 | 0.0385793   | 0.169907   |
| 20231 | 10431637 | <a href="#">NM_025815</a>          | <a href="#">66871</a>  | copine VIII                     | <a href="#">Cpne8</a>         | 0.682 | -4.142 | 0.00406354  | 0.0354015  |
| 20232 | 10556828 | <a href="#">NM_028085</a>          | <a href="#">72074</a>  | ankyrin repeat and sterile alp  | <a href="#">Anks4b</a>        | 0.681 | -4.462 | 0.00272054  | 0.0270061  |
| 20233 | 10597288 | <a href="#">NM_026810</a>          | <a href="#">17350</a>  | mutL homolog 1 (E. coli)        | <a href="#">Mlh1</a>          | 0.681 | -5.58  | 0.000751781 | 0.0107913  |
| 20234 | 10525553 |                                    |                        |                                 |                               | 0.681 | -2.656 | 0.0318012   | 0.149238   |
| 20235 | 10572161 | <a href="#">NM_001013379</a>       | <a href="#">234358</a> | cDNA sequence D10627            | <a href="#">D10627</a>        | 0.681 | -5.433 | 0.000881604 | 0.0119798  |
| 20236 | 10463402 | <a href="#">XR_034011</a>          | <a href="#">383450</a> | similar to 3-phosphoglycerate   | <a href="#">LOC383450</a>     | 0.68  | -6.703 | 0.000242651 | 0.00502386 |
| 20237 | 10482177 | <a href="#">AY380798</a>           | <a href="#">319517</a> | RIKEN cDNA 6430510M02 gene      | <a href="#">6430510M02Rik</a> | 0.68  | -8.266 | 6.25516e-05 | 0.00203008 |
| 20238 | 10586250 | <a href="#">NM_001476250</a>       | <a href="#">102442</a> | DENN/MADD domain containing 4A  | <a href="#">Denn4a</a>        | 0.68  | -3.868 | 0.0022182   | 0.121210   |

|       |          |                                    |                           |                                 |                                    |       |        |             |            |
|-------|----------|------------------------------------|---------------------------|---------------------------------|------------------------------------|-------|--------|-------------|------------|
| 20238 | 10380230 | <a href="#">NM_001470232</a>       | <a href="#">102442</a>    | containing 47                   | <a href="#">Dendrea</a>            | 0.68  | -2.808 | 0.0255182   | 0.121519   |
| 20239 | 10503214 | <a href="#">NM_001081417</a>       | <a href="#">320790</a>    | chromodomain helicase DNA bind  | <a href="#">Chd7</a>               | 0.68  | -3.604 | 0.00825892  | 0.0592507  |
| 20240 | 10589929 | <a href="#">NM_026036</a>          | <a href="#">67213</a>     | CKLF-like MARVEL transmembrane  | <a href="#">Cmtm6</a>              | 0.679 | -6.342 | 0.000343349 | 0.00620493 |
| 20241 | 10469609 | <a href="#">ENSMUST00000100373</a> | <a href="#">100038451</a> | predicted gene, OTTMUSG00000001 | <a href="#">OTTMUSG00000011664</a> | 0.679 | -2.766 | 0.0270551   | 0.13393    |
| 20242 | 10603289 | <a href="#">NM_016691</a>          | <a href="#">12728</a>     | chloride channel 5              | <a href="#">Clcn5</a>              | 0.679 | -6.574 | 0.000274196 | 0.00538052 |
| 20243 | 10399465 | <a href="#">NM_029007</a>          | <a href="#">105005</a>    | expressed sequence AW125753     | <a href="#">AW125753</a>           | 0.679 | -1.934 | 0.0932055   | 0.295866   |
| 20244 | 10568169 | <a href="#">NM_133686</a>          | <a href="#">67375</a>     | quinolinate phosphoribosyltran  | <a href="#">Qprt</a>               | 0.679 | -4.265 | 0.00347919  | 0.031654   |
| 20245 | 10467068 | <a href="#">NM_144792</a>          | <a href="#">208449</a>    | sphingomyelin synthase 1        | <a href="#">Sgms1</a>              | 0.678 | -5.878 | 0.000548531 | 0.00862719 |
| 20246 | 10562612 | <a href="#">NM_001033530</a>       | <a href="#">101835</a>    | expressed sequence AW146154     | <a href="#">AW146154</a>           | 0.678 | -4.15  | 0.00402498  | 0.035138   |
| 20247 | 10462623 | <a href="#">NM_008331</a>          | <a href="#">15957</a>     | interferon-induced protein wit  | <a href="#">Ifit1</a>              | 0.678 | -4.276 | 0.00343018  | 0.0313973  |
| 20248 | 10503166 | <a href="#">NM_001081417</a>       | <a href="#">320790</a>    | chromodomain helicase DNA bind  | <a href="#">Chd7</a>               | 0.678 | -3.848 | 0.00596233  | 0.0467952  |
| 20249 | 10548194 | <a href="#">NM_010219</a>          | <a href="#">14228</a>     | FK506 binding protein 4         | <a href="#">Fkbp4</a>              | 0.677 | -7.033 | 0.000178728 | 0.00410086 |
| 20250 | 10347669 | <a href="#">NM_010564</a>          | <a href="#">16322</a>     | inhibin alpha                   | <a href="#">Inha</a>               | 0.677 | -5.908 | 0.000531552 | 0.00845048 |
| 20251 | 10569017 | <a href="#">NM_025378</a>          | <a href="#">66141</a>     | interferon induced transmembra  | <a href="#">Ifitm3</a>             | 0.677 | -2.582 | 0.0354663   | 0.160407   |
| 20252 | 10380712 | <a href="#">NM_146026</a>          | <a href="#">217138</a>    | ATPase family, AAA domain cont  | <a href="#">Atad4</a>              | 0.677 | -4.006 | 0.00484097  | 0.0402982  |
| 20253 | 10423796 |                                    |                           |                                 |                                    | 0.676 | -4.904 | 0.00160297  | 0.0183009  |
| 20254 | 10598638 | <a href="#">NM_026524</a>          | <a href="#">68041</a>     | Mid1 interacting protein 1 (ga  | <a href="#">Mid1ip1</a>            | 0.676 | -5.239 | 0.0010929   | 0.0139472  |
| 20255 | 10367717 | <a href="#">NM_145418</a>          | <a href="#">215751</a>    | cDNA sequence BC013529          | <a href="#">BC013529</a>           | 0.676 | -5.838 | 0.000571891 | 0.00891087 |
| 20256 | 10544250 | <a href="#">AK122457</a>           | <a href="#">243780</a>    | RIKEN cDNA E330009J07 gene      | <a href="#">E330009J07Rik</a>      | 0.675 | -3.438 | 0.0103739   | 0.0698     |
| 20257 | 10419082 | <a href="#">BC056635</a>           | <a href="#">70564</a>     | RIKEN cDNA 5730469M10 gene      | <a href="#">5730469M10Rik</a>      | 0.675 | -5.785 | 0.000604643 | 0.00925747 |
| 20258 | 10472846 | <a href="#">NM_172665</a>          | <a href="#">228026</a>    | pyruvate dehydrogenase kinase,  | <a href="#">Pdk1</a>               | 0.675 | -4.608 | 0.00227589  | 0.0238935  |
| 20259 | 10464107 | <a href="#">X65588</a>             | <a href="#">26930</a>     | per-pentamer repeat gene        | <a href="#">Ppnr</a>               | 0.675 | -3.54  | 0.00901822  | 0.063056   |
| 20260 | 10423379 | <a href="#">AF075717</a>           | <a href="#">223431</a>    | TGF-beta1-induced anti-apoptot  | <a href="#">Tiaf2</a>              | 0.674 | -2.325 | 0.0519818   | 0.206172   |
| 20261 | 10519241 | <a href="#">NM_029264</a>          | <a href="#">330010</a>    | tubulin tyrosine ligase-like f  | <a href="#">Ttl10</a>              | 0.674 | -5.37  | 0.000944597 | 0.0126089  |
| 20262 | 10503202 | <a href="#">NM_001081417</a>       | <a href="#">320790</a>    | chromodomain helicase DNA bind  | <a href="#">Chd7</a>               | 0.674 | -3.92  | 0.00541842  | 0.0437454  |
| 20263 | 10536593 | <a href="#">BC145701</a>           | <a href="#">66637</a>     | RIKEN cDNA 5730449L18 gene      | <a href="#">5730449L18Rik</a>      | 0.674 | -4.173 | 0.00390533  | 0.0343773  |
| 20264 | 10424347 | <a href="#">XM_001475049</a>       | <a href="#">665565</a>    | similar to Ribosomal protein L  | <a href="#">LOC665565</a>          | 0.673 | -2.074 | 0.075608    | 0.260007   |
| 20265 | 10598359 | <a href="#">NM_009305</a>          | <a href="#">20977</a>     | synaptophysin                   | <a href="#">Syp</a>                | 0.673 | -5.077 | 0.00131253  | 0.0159678  |
| 20266 | 10568221 | <a href="#">NM_009266</a>          | <a href="#">20768</a>     | selenophosphate synthetase 2    | <a href="#">Seps2</a>              | 0.673 | -4.636 | 0.00220091  | 0.0233264  |
| 20267 | 10424404 | <a href="#">NR_003368</a>          | <a href="#">19296</a>     | plasmacytoma variant transloca  | <a href="#">Pvt1</a>               | 0.673 | -4.136 | 0.00409523  | 0.0355458  |
| 20268 | 10535956 | <a href="#">NM_146258</a>          | <a href="#">243362</a>    | STAR-related lipid transfer (S  | <a href="#">Stard13</a>            | 0.672 | -2.48  | 0.0412336   | 0.177132   |
| 20269 | 10551065 | <a href="#">ENSMUST00000098678</a> | <a href="#">434147</a>    | RIKEN cDNA D930028M14 gene      | <a href="#">D930028M14Rik</a>      | 0.672 | -6.038 | 0.000465531 | 0.00767799 |
| 20270 | 10585186 | <a href="#">NM_029639</a>          | <a href="#">76509</a>     | RIKEN cDNA 1600029D21 gene      | <a href="#">1600029D21Rik</a>      | 0.672 | -3.516 | 0.00931747  | 0.064593   |
| 20271 | 10363887 | <a href="#">ENSMUST00000058942</a> | <a href="#">75189</a>     | RIKEN cDNA 4930533K18 gene      | <a href="#">4930533K18Rik</a>      | 0.672 | -4.006 | 0.00484519  | 0.0403004  |
| 20272 | 10459772 | <a href="#">NM_010720</a>          | <a href="#">16891</a>     | lipase, endothelial             | <a href="#">Lipg</a>               | 0.671 | -4.172 | 0.00391313  | 0.0344133  |
| 20273 | 10498357 | <a href="#">AK170843</a>           | <a href="#">320463</a>    | RIKEN cDNA F630111L10 gene      | <a href="#">F630111L10Rik</a>      | 0.671 | -5.389 | 0.000924684 | 0.0124374  |
| 20274 | 10469046 | <a href="#">NM_010726</a>          | <a href="#">16922</a>     | phytanoyl-CoA hydroxylase       | <a href="#">Phyh</a>               | 0.671 | -7.62  | 0.000106601 | 0.0029046  |
| 20275 | 10353549 | <a href="#">BC070446</a>           | <a href="#">68187</a>     | RIKEN cDNA 4921533L14 gene      | <a href="#">4921533L14Rik</a>      | 0.671 | -6.191 | 0.000398818 | 0.00691197 |
| 20276 | 10594800 | <a href="#">NM_172772</a>          | <a href="#">235461</a>    | RIKEN cDNA B230380D07 gene      | <a href="#">B230380D07Rik</a>      | 0.67  | -4.428 | 0.00283678  | 0.0278091  |
| 20277 | 10492231 | <a href="#">ENSMUST00000040325</a> | <a href="#">329650</a>    | mediator of RNA polymerase II   | <a href="#">Med12l</a>             | 0.67  | -5.622 | 0.000718408 | 0.0104471  |
| 20278 | 10574694 | <a href="#">NM_172760</a>          | <a href="#">234683</a>    | engulfment and cell motility 3  | <a href="#">Elmo3</a>              | 0.67  | -9.073 | 3.36919e-05 | 0.00133405 |
| 20279 | 10499113 | <a href="#">NM_001001650</a>       | <a href="#">368202</a>    | gene model 1019, (NCBI)         | <a href="#">Gm1019</a>             | 0.67  | -5.23  | 0.00110381  | 0.0140596  |
| 20280 | 10566767 | <a href="#">NM_001001326</a>       | <a href="#">76954</a>     | suppression of tumorigenicity   | <a href="#">St5</a>                | 0.67  | -5.387 | 0.000926638 | 0.0124557  |
| 20281 | 10483178 | <a href="#">NM_177025</a>          | <a href="#">319876</a>    | Cobl-like 1                     | <a href="#">Cobl1l</a>             | 0.67  | -3.228 | 0.0139071   | 0.0854991  |
| 20282 | 10598626 | <a href="#">NM_019634</a>          | <a href="#">21912</a>     | tetraspanin 7                   | <a href="#">Tspan7</a>             | 0.67  | -3.052 | 0.0178623   | 0.10147    |
| 20283 | 10420747 | <a href="#">NM_008092</a>          | <a href="#">14463</a>     | GATA binding protein 4          | <a href="#">Gata4</a>              | 0.669 | -3.598 | 0.0083335   | 0.0595886  |
| 20284 | 10596718 | <a href="#">NM_023805</a>          | <a href="#">76257</a>     | solute carrier family 38, memb  | <a href="#">Slc38a3</a>            | 0.669 | -3.86  | 0.00586169  | 0.0462423  |
| 20285 | 10501310 | <a href="#">NM_017302</a>          | <a href="#">53883</a>     | cadherin, EGF LAG seven-pass    | <a href="#">Ccler2</a>             | 0.667 | -6.569 | 0.000275425 | 0.0053072  |

|       |          |                                    |                        |                                 |                                    |       |        |             |             |
|-------|----------|------------------------------------|------------------------|---------------------------------|------------------------------------|-------|--------|-------------|-------------|
| 20285 | 1039148  | <a href="#">NM_175930</a>          | <a href="#">217944</a> | G                               | <a href="#">Ctcf2</a>              | 0.667 | -7.132 | 0.000163453 | 0.00385291  |
| 20286 | 10399148 | <a href="#">NM_175930</a>          | <a href="#">217944</a> | Rap guanine nucleotide exchange | <a href="#">Ragef5</a>             | 0.667 | -7.132 | 0.000163453 | 0.00385291  |
| 20287 | 10350349 | <a href="#">NM_181347</a>          | <a href="#">329260</a> | DENN/MADD domain containing 1B  | <a href="#">Dennd1b</a>            | 0.667 | -4.181 | 0.00387026  | 0.0341512   |
| 20288 | 10389732 | <a href="#">NR_003564</a>          | <a href="#">217066</a> | predicted gene, OTTMUSG00000000 | <a href="#">OTTMUSG00000001305</a> | 0.667 | -2.777 | 0.0266163   | 0.132636    |
| 20289 | 10606174 | <a href="#">NM_008671</a>          | <a href="#">17954</a>  | nucleosome assembly protein 1-  | <a href="#">Nap112</a>             | 0.667 | -2.689 | 0.0302895   | 0.144706    |
| 20290 | 10388718 | <a href="#">NM_008952</a>          | <a href="#">19193</a>  | pipecolic acid oxidase          | <a href="#">Pipox</a>              | 0.667 | -5.119 | 0.00125002  | 0.0154515   |
| 20291 | 10503174 | <a href="#">NM_001081417</a>       | <a href="#">320790</a> | chromodomain helicase DNA bind  | <a href="#">Chd7</a>               | 0.666 | -5.474 | 0.000843114 | 0.0116136   |
| 20292 | 10545450 | <a href="#">NM_009443</a>          | <a href="#">22134</a>  | trans-golgi network protein     | <a href="#">Tgoln1</a>             | 0.666 | -8.724 | 4.37511e-05 | 0.00159221  |
| 20293 | 10398386 |                                    |                        |                                 |                                    | 0.666 | -2.832 | 0.0245495   | 0.125928    |
| 20294 | 10365601 | <a href="#">NM_001004164</a>       | <a href="#">432486</a> | N-acetylglucosamine-1-phosphat  | <a href="#">Gnptab</a>             | 0.666 | -8.974 | 3.624e-05   | 0.0013932   |
| 20295 | 10503194 | <a href="#">NM_001081417</a>       | <a href="#">320790</a> | chromodomain helicase DNA bind  | <a href="#">Chd7</a>               | 0.666 | -4.553 | 0.00243418  | 0.0249846   |
| 20296 | 10502816 | <a href="#">NM_016867</a>          | <a href="#">54120</a>  | GIPC PDZ domain containing fam  | <a href="#">Gipc2</a>              | 0.665 | -5.626 | 0.000715228 | 0.010408    |
| 20297 | 10592535 | <a href="#">NM_011436</a>          | <a href="#">20660</a>  | sortilin-related receptor, LDL  | <a href="#">Sorl1</a>              | 0.665 | -8.222 | 6.47932e-05 | 0.00206013  |
| 20298 | 10497485 | <a href="#">XM_975226</a>          | <a href="#">635702</a> | N-acetylated alpha-linked acid  | <a href="#">Naaladl2</a>           | 0.665 | -3.537 | 0.00906035  | 0.0632413   |
| 20299 | 10408557 | <a href="#">NM_025429</a>          | <a href="#">66222</a>  | serine (or cysteine) peptidase  | <a href="#">Serpinb1a</a>          | 0.665 | -3.071 | 0.0173911   | 0.0997203   |
| 20300 | 10557575 | <a href="#">NM_016754</a>          | <a href="#">17907</a>  | myosin light chain, phosphoryl  | <a href="#">Myli1f</a>             | 0.665 | -3.86  | 0.00586339  | 0.0462423   |
| 20301 | 10352320 | <a href="#">NM_144794</a>          | <a href="#">208795</a> | transmembrane protein 63a       | <a href="#">Tmem63a</a>            | 0.665 | -5.137 | 0.00122514  | 0.0152338   |
| 20302 | 10396485 | <a href="#">NM_001005510</a>       | <a href="#">319565</a> | synaptic nuclear envelope 2     | <a href="#">Syne2</a>              | 0.665 | -7.107 | 0.0001671   | 0.00392137  |
| 20303 | 10542727 | <a href="#">NM_009449</a>          | <a href="#">22147</a>  | tubulin, alpha 3B               | <a href="#">Tuba3b</a>             | 0.664 | -1.971 | 0.0881542   | 0.286143    |
| 20304 | 10345241 | <a href="#">NM_134448</a>          | <a href="#">13518</a>  | dystonin                        | <a href="#">Dst</a>                | 0.664 | -8.379 | 5.7182e-05  | 0.00189507  |
| 20305 | 10578574 | <a href="#">NM_175162</a>          | <a href="#">71069</a>  | storkhead box 2                 | <a href="#">Stox2</a>              | 0.664 | -6.002 | 0.000482931 | 0.00788501  |
| 20306 | 10499108 | <a href="#">NM_177130</a>          | <a href="#">320302</a> | glycosyltransferase 28 domain   | <a href="#">Glt28d2</a>            | 0.664 | -2.625 | 0.0332849   | 0.153865    |
| 20307 | 10398366 |                                    |                        |                                 |                                    | 0.663 | -2.935 | 0.0211602   | 0.113932    |
| 20308 | 10587699 | <a href="#">NM_011245</a>          | <a href="#">19417</a>  | RAS protein-specific guanine n  | <a href="#">Rasgrf1</a>            | 0.663 | -6.617 | 0.000263232 | 0.00527061  |
| 20309 | 10599342 | <a href="#">NM_183126</a>          | <a href="#">77883</a>  | RIKEN cDNA 6030498E09 gene      | <a href="#">6030498E09Rik</a>      | 0.662 | -2.482 | 0.0411081   | 0.176721    |
| 20310 | 10419551 | <a href="#">NM_028312</a>          | <a href="#">72654</a>  | coiled-coil domain containing   | <a href="#">Ccdc12</a>             | 0.662 | -5.713 | 0.000652206 | 0.00975955  |
| 20311 | 10452404 | <a href="#">NM_026497</a>          | <a href="#">67993</a>  | nudix (nucleoside diphosphate   | <a href="#">Nudt12</a>             | 0.662 | -6.472 | 0.000302387 | 0.00575488  |
| 20312 | 10407286 | <a href="#">ENSMUST00000078163</a> | <a href="#">408066</a> | cDNA sequence BC067074          | <a href="#">BC067074</a>           | 0.661 | -5.239 | 0.00109184  | 0.0139472   |
| 20313 | 10481092 | <a href="#">NM_026212</a>          | <a href="#">67512</a>  | 1-acylglycerol-3-phosphate O-a  | <a href="#">Agpat2</a>             | 0.661 | -5.346 | 0.00096959  | 0.0128528   |
| 20314 | 10391084 | <a href="#">NM_010404</a>          | <a href="#">15114</a>  | huntingtin-associated protein   | <a href="#">Hap1</a>               | 0.661 | -4.321 | 0.00324347  | 0.0301848   |
| 20315 | 10467258 | <a href="#">NM_001099634</a>       | <a href="#">226101</a> | fer-1-like 3, myoferlin (C. el  | <a href="#">Fer1l3</a>             | 0.661 | -2.688 | 0.0303188   | 0.144742    |
| 20316 | 10436392 | <a href="#">NM_007757</a>          | <a href="#">12892</a>  | coproporphyrinogen oxidase      | <a href="#">Cpox</a>               | 0.66  | -2.845 | 0.0241073   | 0.124232    |
| 20317 | 10503218 | <a href="#">NM_001081417</a>       | <a href="#">320790</a> | chromodomain helicase DNA bind  | <a href="#">Chd7</a>               | 0.66  | -3.881 | 0.00570684  | 0.0453497   |
| 20318 | 10496837 | <a href="#">ENSMUST00000038090</a> | <a href="#">70892</a>  | tubulin tyrosine ligase-like f  | <a href="#">Ttl7</a>               | 0.659 | -5.018 | 0.00140328  | 0.0166598   |
| 20319 | 10514072 | <a href="#">NM_026647</a>          | <a href="#">68268</a>  | zinc finger, DHHC domain conta  | <a href="#">Zdhhc21</a>            | 0.659 | -6.408 | 0.000321953 | 0.00596092  |
| 20320 | 10388185 | <a href="#">NM_177776</a>          | <a href="#">276829</a> | smoothelin-like 2               | <a href="#">Smtnl2</a>             | 0.659 | -8.301 | 6.08211e-05 | 0.0019938   |
| 20321 | 10373583 | <a href="#">NM_010272</a>          | <a href="#">14561</a>  | growth differentiation factor   | <a href="#">Gdf11</a>              | 0.659 | -6.457 | 0.000306984 | 0.00580546  |
| 20322 | 10453062 | <a href="#">NM_019717</a>          | <a href="#">56298</a>  | ADP-ribosylation factor-like 6  | <a href="#">Arl6ip2</a>            | 0.659 | -9.191 | 3.08847e-05 | 0.00126067  |
| 20323 | 10519028 | <a href="#">NM_027504</a>          | <a href="#">70673</a>  | PR domain containing 16         | <a href="#">Prdm16</a>             | 0.659 | -3.972 | 0.00506416  | 0.0416883   |
| 20324 | 10420846 | <a href="#">NM_021458</a>          | <a href="#">14365</a>  | frizzled homolog 3 (Drosophila  | <a href="#">Fzd3</a>               | 0.658 | -5.923 | 0.000523409 | 0.00834613  |
| 20325 | 10479747 |                                    |                        |                                 |                                    | 0.658 | -2.034 | 0.0802868   | 0.270212    |
| 20326 | 10435693 | <a href="#">NM_001017429</a>       | <a href="#">12856</a>  | cytochrome c oxidase, subunit   | <a href="#">Cox17</a>              | 0.658 | -4.968 | 0.00148745  | 0.0172522   |
| 20327 | 10369232 | <a href="#">ENSMUST00000066340</a> | <a href="#">791309</a> | predicted gene, ENSMUSG00000005 | <a href="#">ENSMUSG00000053739</a> | 0.658 | -4.764 | 0.00188939  | 0.0207313   |
| 20328 | 10388440 | <a href="#">NM_008878</a>          | <a href="#">18816</a>  | serine (or cysteine) peptidase  | <a href="#">Serpinf2</a>           | 0.658 | -4.063 | 0.00450018  | 0.0380607   |
| 20329 | 10571274 | <a href="#">NM_010344</a>          | <a href="#">14782</a>  | glutathione reductase           | <a href="#">Gsr</a>                | 0.657 | -10.26 | 1.46883e-05 | 0.000764951 |
| 20330 | 10542460 | <a href="#">NM_172733</a>          | <a href="#">232449</a> | 2-deoxyribose-5-phosphate aldo  | <a href="#">Dera</a>               | 0.657 | -5.749 | 0.000627606 | 0.0095058   |
| 20331 | 10439442 | <a href="#">NM_134102</a>          | <a href="#">85031</a>  | phospholipase A1 member A       | <a href="#">Pla1a</a>              | 0.657 | -4.478 | 0.00266655  | 0.0266202   |
| 20332 | 10600301 | <a href="#">NM_009279</a>          | <a href="#">20832</a>  | signal sequence receptor, delt  | <a href="#">Ssr4</a>               | 0.657 | -7.33  | 0.00013707  | 0.00340165  |
| 20333 | 10595848 | <a href="#">NM_145134</a>          | <a href="#">211949</a> | splA/ryanodine receptor domain  | <a href="#">Spsb4</a>              | 0.657 | -5.768 | 0.000615006 | 0.00938306  |
| 20334 | 10595702 | <a href="#">NM_001033145</a>       | <a href="#">68861</a>  | RIKEN cDNA 1190002N15 gene      | <a href="#">1190002N15Rik</a>      | 0.657 | -4.442 | 0.00278817  | 0.0274583   |

|       |          |                              |                        |                                   |                                    |       |        |             |            |
|-------|----------|------------------------------|------------------------|-----------------------------------|------------------------------------|-------|--------|-------------|------------|
| 20335 | 10497031 |                              |                        |                                   |                                    | 0.656 | -4.05  | 0.00457432  | 0.0385644  |
| 20336 | 10458090 | <a href="#">NM_007874</a>    | <a href="#">13476</a>  | receptor accessory protein 5      | <a href="#">Reep5</a>              | 0.656 | -3.843 | 0.00599569  | 0.0469175  |
| 20337 | 10558921 | <a href="#">NM_025802</a>    | <a href="#">66853</a>  | patatin-like phospholipase dom    | <a href="#">Pnpla2</a>             | 0.655 | -8.583 | 4.87496e-05 | 0.00171223 |
| 20338 | 10398356 |                              |                        |                                   |                                    | 0.655 | -3.851 | 0.00593744  | 0.0467005  |
| 20339 | 10536483 | <a href="#">NM_207176</a>    | <a href="#">21753</a>  | testis derived transcript         | <a href="#">Tes</a>                | 0.655 | -6.964 | 0.000190299 | 0.00424888 |
| 20340 | 10488830 | <a href="#">NM_001004721</a> | <a href="#">228812</a> | phosphatidylinositol glycan an    | <a href="#">Pigu</a>               | 0.655 | -8.237 | 6.4028e-05  | 0.00205746 |
| 20341 | 10429968 |                              |                        |                                   |                                    | 0.655 | -4.313 | 0.00327477  | 0.0303959  |
| 20342 | 10581069 | <a href="#">BC022771</a>     | <a href="#">791360</a> | predicted gene,<br>ENSMUSG0000005 | <a href="#">ENSMUSG00000051554</a> | 0.655 | -3.11  | 0.0164359   | 0.0962129  |
| 20343 | 10398364 |                              |                        |                                   |                                    | 0.655 | -4.18  | 0.00387319  | 0.0341512  |
| 20344 | 10583820 | <a href="#">NM_001033813</a> | <a href="#">619310</a> | RIKEN cDNA 9530015I07 gene        | <a href="#">9530015I07Rik</a>      | 0.654 | -4.398 | 0.00294483  | 0.028407   |
| 20345 | 10467420 | <a href="#">NM_016861</a>    | <a href="#">54132</a>  | PDZ and LIM domain 1 (elfin)      | <a href="#">Pdlim1</a>             | 0.654 | -5.7   | 0.000660836 | 0.00984721 |
| 20346 | 10507379 | <a href="#">NM_001029912</a> | <a href="#">74464</a>  | zinc finger, SWIM domain conta    | <a href="#">Zswim5</a>             | 0.654 | -5.53  | 0.000792773 | 0.0111675  |
| 20347 | 10586130 | <a href="#">BC027311</a>     | <a href="#">66939</a>  | RIKEN cDNA 2310007F21 gene        | <a href="#">2310007F21Rik</a>      | 0.654 | -5.73  | 0.000640429 | 0.00963473 |
| 20348 | 10575750 | <a href="#">NM_021486</a>    | <a href="#">63857</a>  | beta-carotene 15,15'-monooxyge    | <a href="#">Bcmo1</a>              | 0.653 | -5.34  | 0.000976531 | 0.0128727  |
| 20349 | 10401997 | <a href="#">NM_011877</a>    | <a href="#">24000</a>  | protein tyrosine phosphatase,     | <a href="#">Ptpn21</a>             | 0.653 | -6.583 | 0.000271911 | 0.00536314 |
| 20350 | 10471880 |                              |                        |                                   |                                    | 0.653 | -3.193 | 0.0146239   | 0.0886236  |
| 20351 | 10504234 | <a href="#">NM_001081413</a> | <a href="#">22249</a>  | unc-13 homolog B (C. elegans)     | <a href="#">Unc13b</a>             | 0.653 | -5.464 | 0.000851845 | 0.0116881  |
| 20352 | 10604616 | <a href="#">NM_019538</a>    | <a href="#">56096</a>  | placental specific protein 1      | <a href="#">Plac1</a>              | 0.653 | -2.98  | 0.0198217   | 0.109228   |
| 20353 | 10537849 | <a href="#">NM_133674</a>    | <a href="#">54324</a>  | Rho guanine nucleotide exchang    | <a href="#">Arhgef5</a>            | 0.653 | -6.643 | 0.000256648 | 0.00517663 |
| 20354 | 10445241 | <a href="#">NM_178589</a>    | <a href="#">94185</a>  | tumor necrosis factor receptor    | <a href="#">Tnfrsf21</a>           | 0.653 | -5.025 | 0.00139193  | 0.0166183  |
| 20355 | 10432652 | <a href="#">NM_033612</a>    | <a href="#">109901</a> | elastase 1, pancreatic            | <a href="#">Ela1</a>               | 0.652 | -4.37  | 0.00305019  | 0.0290634  |
| 20356 | 10492864 | <a href="#">NM_001082414</a> | <a href="#">27059</a>  | SH3 domain protein D19            | <a href="#">Sh3d19</a>             | 0.652 | -7.694 | 0.000100118 | 0.00277806 |
| 20357 | 10398368 |                              |                        |                                   |                                    | 0.651 | -2.889 | 0.0225863   | 0.118836   |
| 20358 | 10543120 | <a href="#">NM_010492</a>    | <a href="#">15893</a>  | islet cell autoantigen 1          | <a href="#">Ica1</a>               | 0.651 | -3.139 | 0.0157867   | 0.0934735  |
| 20359 | 10394802 |                              |                        |                                   |                                    | 0.651 | -3.634 | 0.00793121  | 0.0576875  |
| 20360 | 10386965 | <a href="#">NM_175003</a>    | <a href="#">216831</a> | expressed sequence AU040829       | <a href="#">AU040829</a>           | 0.651 | -8.928 | 3.75204e-05 | 0.00142276 |
| 20361 | 10398326 | <a href="#">NR_003633</a>    | <a href="#">17263</a>  | maternally expressed 3            | <a href="#">Meg3</a>               | 0.65  | -4.051 | 0.00456937  | 0.038538   |
| 20362 | 10558948 | <a href="#">NM_009842</a>    | <a href="#">12476</a>  | CD151 antigen                     | <a href="#">Cd151</a>              | 0.65  | -5.019 | 0.00140234  | 0.016658   |
| 20363 | 10571840 | <a href="#">NM_008278</a>    | <a href="#">15446</a>  | hydroxyprostaglandin dehydroge    | <a href="#">Hpgd</a>               | 0.65  | -5.291 | 0.00103072  | 0.013395   |
| 20364 | 10563527 | <a href="#">NM_153677</a>    | <a href="#">72088</a>  | Usher syndrome 1C homolog<br>(hum | <a href="#">Ush1c</a>              | 0.65  | -6.444 | 0.000310856 | 0.00584508 |
| 20365 | 10468990 | <a href="#">NM_001005767</a> | <a href="#">381038</a> | presenilin associated, rhomboid   | <a href="#">Parl</a>               | 0.649 | -5.344 | 0.000972215 | 0.0128559  |
| 20366 | 10466947 | <a href="#">NM_001081213</a> | <a href="#">226090</a> | endoplasmic reticulum metallo     | <a href="#">Ermp1</a>              | 0.649 | -4.638 | 0.00219676  | 0.0233057  |
| 20367 | 10481278 | <a href="#">NM_009885</a>    | <a href="#">12613</a>  | carboxyl ester lipase             | <a href="#">Cel</a>                | 0.649 | -4.224 | 0.00366342  | 0.0328828  |
| 20368 | 10366346 | <a href="#">NM_009344</a>    | <a href="#">21664</a>  | pleckstrin homology-like domai    | <a href="#">Phlda1</a>             | 0.649 | -3.901 | 0.0055545   | 0.0445878  |
| 20369 | 10499988 | <a href="#">BC107021</a>     | <a href="#">66353</a>  | RIKEN cDNA 2310007A19<br>gene     | <a href="#">2310007A19Rik</a>      | 0.648 | -4.835 | 0.00173777  | 0.0193896  |
| 20370 | 10482249 | <a href="#">NM_010264</a>    | <a href="#">14536</a>  | nuclear receptor subfamily 6,     | <a href="#">Nr6a1</a>              | 0.648 | -4.785 | 0.00184178  | 0.0203143  |
| 20371 | 10480585 | <a href="#">NM_172204</a>    | <a href="#">241275</a> | NADPH oxidase activator 1         | <a href="#">Noxa1</a>              | 0.648 | -8.409 | 5.5864e-05  | 0.00186897 |
| 20372 | 10549879 | <a href="#">NM_021323</a>    | <a href="#">57775</a>  | ubiquitin specific peptidase 2    | <a href="#">Usp29</a>              | 0.648 | -8.21  | 6.54225e-05 | 0.00206613 |
| 20373 | 10384051 | <a href="#">NM_010292</a>    | <a href="#">103988</a> | glucokinase                       | <a href="#">Gek</a>                | 0.648 | -3.252 | 0.0134397   | 0.0834564  |
| 20374 | 10594001 | <a href="#">NM_019689</a>    | <a href="#">56380</a>  | AT rich interactive domain 3B     | <a href="#">Arid3b</a>             | 0.648 | -4.012 | 0.00480534  | 0.0400332  |
| 20375 | 10389134 | <a href="#">NM_172796</a>    | <a href="#">237886</a> | schlafen 9                        | <a href="#">Slfn9</a>              | 0.648 | -5.089 | 0.00129372  | 0.0158118  |
| 20376 | 10353750 | <a href="#">NM_145392</a>    | <a href="#">213539</a> | Bcl2-associated athanogene 2      | <a href="#">Bag2</a>               | 0.647 | -5.085 | 0.00129957  | 0.0158558  |
| 20377 | 10607562 | <a href="#">NM_177751</a>    | <a href="#">245684</a> | connector enhancer of kinase s    | <a href="#">Cnksr2</a>             | 0.647 | -7.132 | 0.000163428 | 0.00385291 |
| 20378 | 10584891 | <a href="#">NM_007503</a>    | <a href="#">11936</a>  | FXFD domain-containing ion tra    | <a href="#">Fxyd2</a>              | 0.647 | -8.598 | 4.81917e-05 | 0.00170608 |
| 20379 | 10585381 | <a href="#">NM_028060</a>    | <a href="#">72022</a>  | solute carrier family 35, memb    | <a href="#">Slc35f2</a>            | 0.647 | -4.056 | 0.00454088  | 0.038359   |
| 20380 | 10433163 | <a href="#">NM_021391</a>    | <a href="#">58200</a>  | protein phosphatase 1, regulat    | <a href="#">Ppp1r1a</a>            | 0.647 | -9.515 | 2.44681e-05 | 0.00107113 |
| 20381 | 10382435 | <a href="#">NM_001110337</a> | <a href="#">70355</a>  | G protein-coupled receptor, fa    | <a href="#">Gpre5c</a>             | 0.646 | -6.772 | 0.000227356 | 0.00480242 |
| 20382 | 10409118 | <a href="#">NM_029361</a>    | <a href="#">75607</a>  | WNK lysine deficient protein k    | <a href="#">Wnk2</a>               | 0.645 | -4.55  | 0.00244323  | 0.0250289  |
| 20383 | 10543306 | <a href="#">NM_173007</a>    | <a href="#">269831</a> | tetraspanin 12                    | <a href="#">Tspan12</a>            | 0.645 | -8.231 | 6.43268e-05 | 0.00205963 |
| 20384 | 10430425 | <a href="#">NM_025622</a>    | <a href="#">107753</a> | lectin, galactose-binding, sol    | <a href="#">Lgals2</a>             | 0.645 | -3.077 | 0.017246    | 0.0992784  |
| 20385 | 10554926 | <a href="#">NM_025515</a>    | <a href="#">66365</a>  | coiled-coil domain containing     | <a href="#">Ccdc90b</a>            | 0.645 | -7.468 | 0.000121491 | 0.00314805 |
| 20386 | 10400941 | <a href="#">NM_025522</a>    | <a href="#">66375</a>  | dehydrogenase/reductase (SDR f    | <a href="#">Dhrs7</a>              | 0.645 | -4.398 | 0.00294495  | 0.028407   |
| 20387 | 10488322 | <a href="#">NM_001033348</a> | <a href="#">241694</a> | RIKEN cDNA A230067G21<br>gene     | <a href="#">A230067G21Rik</a>      | 0.645 | -4.1   | 0.0042913   | 0.0367052  |
| 20388 | 10536401 | <a href="#">NM_008751</a>    | <a href="#">18231</a>  | neurexophilin 1                   | <a href="#">Nxph1</a>              | 0.644 | -4.076 | 0.00442707  | 0.0375626  |

|       |          |                                    |                           |                                |                                    |       |        |             |             |
|-------|----------|------------------------------------|---------------------------|--------------------------------|------------------------------------|-------|--------|-------------|-------------|
| 20389 | 10357164 | <a href="#">NM_145506</a>          | <a href="#">226352</a>    | erythrocyte protein band 4.1-1 | <a href="#">Epb4.115</a>           | 0.644 | -7.907 | 8.37374e-05 | 0.00246251  |
| 20390 | 10403229 | <a href="#">NM_177290</a>          | <a href="#">320910</a>    | integrin beta 8                | <a href="#">Itgb8</a>              | 0.644 | -2.76  | 0.027277    | 0.134663    |
| 20391 | 10548729 | <a href="#">NM_026345</a>          | <a href="#">67729</a>     | MANSC domain containing 1      | <a href="#">Mansc1</a>             | 0.644 | -6.397 | 0.000325409 | 0.00601439  |
| 20392 | 10494069 | <a href="#">NM_172434</a>          | <a href="#">78784</a>     | trinucleotide repeat containin | <a href="#">Tnrc4</a>              | 0.644 | -5.027 | 0.00138894  | 0.0166024   |
| 20393 | 10539702 | <a href="#">BC103775</a>           | <a href="#">66488</a>     | RIKEN cDNA 2010309E21 gene     | <a href="#">2010309E21Rik</a>      | 0.644 | -8.478 | 5.28974e-05 | 0.0018216   |
| 20394 | 10568109 | <a href="#">NM_001039645</a>       | <a href="#">233879</a>    | aspartate beta-hydroxylase dom | <a href="#">Asphd1</a>             | 0.644 | -5.641 | 0.000703529 | 0.0102944   |
| 20395 | 10593483 | <a href="#">NM_007996</a>          | <a href="#">14148</a>     | ferredoxin 1                   | <a href="#">Fdx1</a>               | 0.644 | -7.212 | 0.000152149 | 0.00364743  |
| 20396 | 10346564 | <a href="#">NM_009812</a>          | <a href="#">12370</a>     | caspase 8                      | <a href="#">Casp8</a>              | 0.644 | -5.303 | 0.00101684  | 0.0133115   |
| 20397 | 10410477 | <a href="#">NM_172053</a>          | <a href="#">271127</a>    | a disintegrin-like and metallo | <a href="#">Adamts16</a>           | 0.644 | -5.774 | 0.000611299 | 0.00933909  |
| 20398 | 10463911 | <a href="#">NM_013758</a>          | <a href="#">27360</a>     | adducin 3 (gamma)              | <a href="#">Add3</a>               | 0.643 | -9.104 | 3.2932e-05  | 0.00131336  |
| 20399 | 10362379 | <a href="#">NM_025855</a>          | <a href="#">52665</a>     | enoyl Coenzyme A hydratase dom | <a href="#">Echdc1</a>             | 0.643 | -4.761 | 0.0018954   | 0.0207757   |
| 20400 | 10375677 |                                    |                           |                                |                                    | 0.643 | -2.309 | 0.0531767   | 0.209185    |
| 20401 | 10408935 | <a href="#">ENSMUST00000099550</a> | <a href="#">100038539</a> | predicted gene, ENSMUSG0000007 | <a href="#">ENSMUSG00000074917</a> | 0.643 | -2.315 | 0.0527317   | 0.207909    |
| 20402 | 10397148 | <a href="#">NM_012006</a>          | <a href="#">26897</a>     | acyl-CoA thioesterase 1        | <a href="#">Acot1</a>              | 0.642 | -9.884 | 1.89239e-05 | 0.000913534 |
| 20403 | 10453429 | <a href="#">NM_008838</a>          | <a href="#">18701</a>     | phosphatidylinositol glycan an | <a href="#">Pigf</a>               | 0.642 | -6.656 | 0.000253565 | 0.00515463  |
| 20404 | 10503198 | <a href="#">NM_001081417</a>       | <a href="#">320790</a>    | chromodomain helicase DNA bind | <a href="#">Chd7</a>               | 0.642 | -3.628 | 0.00800293  | 0.0580494   |
| 20405 | 10602198 | <a href="#">NM_008778</a>          | <a href="#">18481</a>     | p21 (CDKN1A)-activated kinase  | <a href="#">Pak3</a>               | 0.64  | -5.461 | 0.000855048 | 0.0117245   |
| 20406 | 10398378 |                                    |                           |                                |                                    | 0.64  | -3.026 | 0.0185551   | 0.104232    |
| 20407 | 10364511 | <a href="#">BC013508</a>           | <a href="#">78906</a>     | RIKEN cDNA 9130017N09 gene     | <a href="#">9130017N09Rik</a>      | 0.64  | -5.275 | 0.00104984  | 0.0135996   |
| 20408 | 10544487 | <a href="#">NM_013861</a>          | <a href="#">29807</a>     | thiamine pyrophosphokinase     | <a href="#">Tpk1</a>               | 0.64  | -3.838 | 0.00603698  | 0.0471366   |
| 20409 | 10486833 | <a href="#">NM_145973</a>          | <a href="#">269344</a>    | elongation factor RNA polymera | <a href="#">Eif3</a>               | 0.64  | -4.794 | 0.00182205  | 0.0201388   |
| 20410 | 10379795 | <a href="#">NM_194341</a>          | <a href="#">217030</a>    | API gamma subunit binding prot | <a href="#">Ap1gbp1</a>            | 0.639 | -8.753 | 4.28059e-05 | 0.0015659   |
| 20411 | 10354677 | <a href="#">NM_001081433</a>       | <a href="#">329154</a>    | ankyrin repeat domain 44       | <a href="#">Ankrd44</a>            | 0.639 | -6.347 | 0.000341617 | 0.00618755  |
| 20412 | 10458122 | <a href="#">NM_080637</a>          | <a href="#">75533</a>     | non-metastatic cells 5, protei | <a href="#">Nme5</a>               | 0.639 | -4.387 | 0.0029852   | 0.0286589   |
| 20413 | 10409660 | <a href="#">NM_019832</a>          | <a href="#">56278</a>     | G kinase anchoring protein 1   | <a href="#">Gkap1</a>              | 0.639 | -5.584 | 0.000748324 | 0.0107563   |
| 20414 | 10410778 | <a href="#">NM_054053</a>          | <a href="#">110789</a>    | G protein-coupled receptor 98  | <a href="#">Gpr98</a>              | 0.638 | -7.359 | 0.000133533 | 0.0033453   |
| 20415 | 10369525 | <a href="#">BC024943</a>           | <a href="#">69894</a>     | RIKEN cDNA 2010107G23 gene     | <a href="#">2010107G23Rik</a>      | 0.638 | -5.881 | 0.000546902 | 0.00861677  |
| 20416 | 10540227 | <a href="#">NM_001008785</a>       | <a href="#">243574</a>    | kelch repeat and BTB (POZ) dom | <a href="#">Kbtbd8</a>             | 0.638 | -9.337 | 2.77946e-05 | 0.00118247  |
| 20417 | 10396606 | <a href="#">NM_001005510</a>       | <a href="#">319565</a>    | synaptic nuclear envelope 2    | <a href="#">Syne2</a>              | 0.638 | -6.866 | 0.000208361 | 0.00454653  |
| 20418 | 10598075 |                                    |                           |                                |                                    | 0.638 | -2.083 | 0.0745359   | 0.258241    |
| 20419 | 10490016 | <a href="#">NM_175303</a>          | <a href="#">99377</a>     | sal-like 4 (Drosophila)        | <a href="#">Sall4</a>              | 0.638 | -4.127 | 0.00414396  | 0.0357925   |
| 20420 | 10530563 | <a href="#">NM_028194</a>          | <a href="#">72313</a>     | furry homolog-like (Drosophila | <a href="#">Fryl</a>               | 0.637 | -9.655 | 2.21832e-05 | 0.00101021  |
| 20421 | 10392183 | <a href="#">NM_023913</a>          | <a href="#">78943</a>     | endoplasmic reticulum (ER) to  | <a href="#">Ern1</a>               | 0.637 | -5.968 | 0.000500009 | 0.00809509  |
| 20422 | 10404827 | <a href="#">NM_023554</a>          | <a href="#">70078</a>     | nucleolar protein 7            | <a href="#">Nol7</a>               | 0.637 | -9.623 | 2.26704e-05 | 0.00101988  |
| 20423 | 10540544 | <a href="#">NM_008188</a>          | <a href="#">14911</a>     | THUMP domain containing 3      | <a href="#">Thumpd3</a>            | 0.637 | -6.425 | 0.000316675 | 0.00590456  |
| 20424 | 10543114 |                                    |                           |                                |                                    | 0.637 | -5.788 | 0.000602579 | 0.00923256  |
| 20425 | 10526277 | <a href="#">NM_021455</a>          | <a href="#">58805</a>     | MLX interacting protein-like   | <a href="#">Mlxipl</a>             | 0.637 | -4.483 | 0.00265064  | 0.026524    |
| 20426 | 10423791 | <a href="#">ENSMUST00000022897</a> | <a href="#">74892</a>     | RIKEN cDNA 4930447A16 gene     | <a href="#">4930447A16Rik</a>      | 0.637 | -8.552 | 4.996e-05   | 0.00173457  |
| 20427 | 10354647 | <a href="#">ENSMUST00000097739</a> | <a href="#">241062</a>    | post-GPI attachment to protein | <a href="#">Pgap1</a>              | 0.637 | -4.405 | 0.00292071  | 0.028306    |
| 20428 | 10455752 | <a href="#">NM_029394</a>          | <a href="#">69226</a>     | sorting nexin 24               | <a href="#">Snx24</a>              | 0.636 | -4.333 | 0.00319375  | 0.0299462   |
| 20429 | 10441254 | <a href="#">NM_015775</a>          | <a href="#">50528</a>     | transmembrane protease, serine | <a href="#">Tmprss2</a>            | 0.636 | -4.067 | 0.00447599  | 0.0378713   |
| 20430 | 10499130 | <a href="#">NR_004418</a>          | <a href="#">19871</a>     | U73B small nuclear RNA         | <a href="#">Rnu73b</a>             | 0.636 | -2.39  | 0.0471345   | 0.192955    |
| 20431 | 10380116 | <a href="#">NM_172448</a>          | <a href="#">207742</a>    | ring finger protein 43         | <a href="#">Rnf43</a>              | 0.636 | -7.966 | 7.97783e-05 | 0.00237582  |
| 20432 | 10495147 | <a href="#">NM_001093754</a>       | <a href="#">72121</a>     | DENN/MADD domain containing 2D | <a href="#">Dennd2d</a>            | 0.636 | -5.525 | 0.000797659 | 0.0112109   |
| 20433 | 10559333 | <a href="#">ENSMUST00000105902</a> | <a href="#">210274</a>    | SH3/ankyrin domain gene 2      | <a href="#">Shank2</a>             | 0.636 | -7.061 | 0.000174177 | 0.00403815  |
| 20434 | 10523845 | <a href="#">NM_001001804</a>       | <a href="#">384214</a>    | abhydrolase domain containing  | <a href="#">Abhd7</a>              | 0.635 | -6.275 | 0.000366745 | 0.00649997  |
| 20435 | 10542911 | <a href="#">ENSMUST00000001113</a> | <a href="#">209086</a>    | sterile alpha motif domain con | <a href="#">Samd9l</a>             | 0.635 | -2.503 | 0.0398799   | 0.173611    |
| 20436 | 10435769 | <a href="#">NM_019778</a>          | <a href="#">56490</a>     | zinc finger and BTB domain con | <a href="#">Zbtb20</a>             | 0.635 | -6.032 | 0.000468388 | 0.00769511  |
| 20437 | 10506767 | <a href="#">NM_026728</a>          | <a href="#">52430</a>     | enoyl Coenzyme A hydratase dom | <a href="#">Echdc2</a>             | 0.635 | -4.724 | 0.00198029  | 0.0214285   |
| 20438 | 10476021 | <a href="#">NM_007547</a>          | <a href="#">19261</a>     | signal-regulatory protein alph | <a href="#">Sirpa</a>              | 0.634 | -7.013 | 0.000181927 | 0.00415407  |

|       |          |                                    |                        |                                |                                    |       |         |             |             |
|-------|----------|------------------------------------|------------------------|--------------------------------|------------------------------------|-------|---------|-------------|-------------|
| 20439 | 10404700 | <a href="#">NM_145441</a>          | <a href="#">217379</a> | UBX domain containing 4        | <a href="#">Ubxid4</a>             | 0.634 | -7.536  | 0.000114575 | 0.00304727  |
| 20440 | 10595664 | <a href="#">NM_025360</a>          | <a href="#">66111</a>  | transmembrane emp24 domain con | <a href="#">Tmed3</a>              | 0.634 | -6.938  | 0.000194876 | 0.00433276  |
| 20441 | 10558880 | <a href="#">NM_133191</a>          | <a href="#">98845</a>  | EPS8-like 2                    | <a href="#">Eps8l2</a>             | 0.634 | -7.73   | 9.71144e-05 | 0.00273057  |
| 20442 | 10606902 | <a href="#">NM_207267</a>          | <a href="#">399591</a> | RIKEN cDNA 4930488E11 gene     | <a href="#">4930488E11Rik</a>      | 0.633 | -4.282  | 0.00340235  | 0.0311965   |
| 20443 | 10398426 |                                    |                        |                                |                                    | 0.633 | -6.33   | 0.000347577 | 0.00625994  |
| 20444 | 10561942 | <a href="#">NM_172898</a>          | <a href="#">243911</a> | kin of IRRE like 2 (Drosophila | <a href="#">Kirrel2</a>            | 0.633 | -7.142  | 0.000161956 | 0.00383373  |
| 20445 | 10506110 | <a href="#">NM_001081202</a>       | <a href="#">381591</a> | LINE-1 type transposase domain | <a href="#">Ltd1</a>               | 0.632 | -5.531  | 0.000792329 | 0.0111675   |
| 20446 | 10425012 | <a href="#">NM_145916</a>          | <a href="#">223669</a> | zinc finger protein 7          | <a href="#">Zfp7</a>               | 0.632 | -3.126  | 0.0160837   | 0.094857    |
| 20447 | 10427908 | <a href="#">ENSMUST00000067671</a> | <a href="#">791293</a> | predicted gene, ENSMUSG0000005 | <a href="#">ENSMUSG00000054546</a> | 0.632 | -6.096  | 0.000438684 | 0.00738884  |
| 20448 | 10398362 | <a href="#">AF357355</a>           | <a href="#">75745</a>  | RNA imprinted and accumulated  | <a href="#">Rian</a>               | 0.632 | -5.301  | 0.00101912  | 0.0133179   |
| 20449 | 10498119 | <a href="#">NM_172862</a>          | <a href="#">242022</a> | Fras1 related extracellular ma | <a href="#">Frem2</a>              | 0.632 | -7.914  | 8.32927e-05 | 0.00245807  |
| 20450 | 10472212 | <a href="#">NM_026361</a>          | <a href="#">227937</a> | plakophilin 4                  | <a href="#">Pkp4</a>               | 0.631 | -9.125  | 3.24079e-05 | 0.00129534  |
| 20451 | 10528227 | <a href="#">NM_010305</a>          | <a href="#">14677</a>  | guanine nucleotide binding pro | <a href="#">Gnai1</a>              | 0.631 | -5.793  | 0.000599187 | 0.00921398  |
| 20452 | 10457323 | <a href="#">NM_177595</a>          | <a href="#">210719</a> | mohawk                         | <a href="#">Mkx</a>                | 0.631 | -2.634  | 0.0328157   | 0.152417    |
| 20453 | 10551907 | <a href="#">NM_019459</a>          | <a href="#">54631</a>  | nephrosis 1 homolog, nephrin ( | <a href="#">Nphs1</a>              | 0.631 | -4.374  | 0.0030346   | 0.0290071   |
| 20454 | 10367805 | <a href="#">NM_172547</a>          | <a href="#">215772</a> | RIKEN cDNA 9130014G24 gene     | <a href="#">9130014G24Rik</a>      | 0.631 | -4.271  | 0.00345304  | 0.0314839   |
| 20455 | 10398432 |                                    |                        |                                |                                    | 0.631 | -2.192  | 0.0633664   | 0.233418    |
| 20456 | 10458828 | <a href="#">NM_033037</a>          | <a href="#">12583</a>  | cysteine dioxygenase 1, cytoso | <a href="#">Cdo1</a>               | 0.631 | -3.405  | 0.0108533   | 0.0717133   |
| 20457 | 10457359 | <a href="#">NM_001081287</a>       | <a href="#">75739</a>  | membrane protein, palmitoylate | <a href="#">Mpp7</a>               | 0.63  | -7.98   | 7.88695e-05 | 0.00236206  |
| 20458 | 10564631 | <a href="#">NM_023908</a>          | <a href="#">108116</a> | solute carrier organic anion t | <a href="#">Slco3a1</a>            | 0.629 | -7.14   | 0.00016222  | 0.00383373  |
| 20459 | 10425267 | <a href="#">NM_008837</a>          | <a href="#">18693</a>  | protein interacting with C kin | <a href="#">Pick1</a>              | 0.629 | -7.878  | 8.57624e-05 | 0.00251506  |
| 20460 | 10595718 | <a href="#">NM_018763</a>          | <a href="#">54371</a>  | carbohydrate sulfotransferase  | <a href="#">Chst2</a>              | 0.629 | -6.297  | 0.000358884 | 0.00640358  |
| 20461 | 10405380 | <a href="#">NM_008011</a>          | <a href="#">14186</a>  | fibroblast growth factor recep | <a href="#">Fgfr4</a>              | 0.629 | -5.604  | 0.000731899 | 0.0105923   |
| 20462 | 10427015 | <a href="#">NM_007395</a>          | <a href="#">11479</a>  | activin A receptor, type 1B    | <a href="#">Acvr1b</a>             | 0.629 | -8.419  | 5.54375e-05 | 0.00186897  |
| 20463 | 10387668 | <a href="#">NM_031880</a>          | <a href="#">83813</a>  | tyrosine kinase, non-receptor, | <a href="#">Tnk1</a>               | 0.629 | -7.145  | 0.000161543 | 0.00382954  |
| 20464 | 10385391 | <a href="#">NM_133769</a>          | <a href="#">76884</a>  | cytoplasmic FMR1 interacting p | <a href="#">Cyfip2</a>             | 0.628 | -7.775  | 9.34761e-05 | 0.00267301  |
| 20465 | 10552919 | <a href="#">NM_010473</a>          | <a href="#">15464</a>  | histidine rich calcium binding | <a href="#">Hrc</a>                | 0.628 | -6.683  | 0.000247212 | 0.00505029  |
| 20466 | 10460221 | <a href="#">NM_013490</a>          | <a href="#">12660</a>  | choline kinase alpha           | <a href="#">Chka</a>               | 0.628 | -9.251  | 2.95577e-05 | 0.00121589  |
| 20467 | 10442914 | <a href="#">NM_026686</a>          | <a href="#">68347</a>  | RIKEN cDNA 0610011F06 gene     | <a href="#">0610011F06Rik</a>      | 0.627 | -5.852  | 0.000563529 | 0.00883266  |
| 20468 | 10404702 | <a href="#">NM_023887</a>          | <a href="#">14538</a>  | glucosaminyl (N-acetyl) transf | <a href="#">Gent2</a>              | 0.627 | -7.732  | 9.69615e-05 | 0.0027299   |
| 20469 | 10434925 | <a href="#">NM_008235</a>          | <a href="#">15205</a>  | hairy and enhancer of split 1  | <a href="#">Hes1</a>               | 0.627 | -6.45   | 0.000308914 | 0.00581628  |
| 20470 | 10469020 | <a href="#">BC096430</a>           | <a href="#">209645</a> | RIKEN cDNA E130319B15 gene     | <a href="#">E130319B15Rik</a>      | 0.627 | -9.991  | 1.75966e-05 | 0.000863256 |
| 20471 | 10349401 | <a href="#">BC085285</a>           | <a href="#">71111</a>  | G protein-coupled receptor 39  | <a href="#">Gpr39</a>              | 0.626 | -4.606  | 0.00228306  | 0.0239354   |
| 20472 | 10434436 | <a href="#">BC125016</a>           | <a href="#">328644</a> | predicted gene, EG328644       | <a href="#">EG328644</a>           | 0.626 | -5.701  | 0.000660443 | 0.00984721  |
| 20473 | 10368162 | <a href="#">NM_008822</a>          | <a href="#">18634</a>  | peroxisome biogenesis factor 7 | <a href="#">Pex7</a>               | 0.626 | -8.003  | 7.73766e-05 | 0.00232724  |
| 20474 | 10463906 | <a href="#">NM_008386</a>          | <a href="#">16333</a>  | insulin I                      | <a href="#">Ins1</a>               | 0.626 | -5.283  | 0.0010401   | 0.0134837   |
| 20475 | 10582839 | <a href="#">BC025186</a>           | <a href="#">628856</a> | predicted gene, ENSMUSG0000005 | <a href="#">ENSMUSG00000053531</a> | 0.626 | -4.406  | 0.00291741  | 0.0282962   |
| 20476 | 10459768 |                                    |                        |                                |                                    | 0.625 | -6.473  | 0.0003022   | 0.00575488  |
| 20477 | 10542896 | <a href="#">NM_009753</a>          | <a href="#">12121</a>  | bicaudal D homolog 1 (Drosophi | <a href="#">Bicd1</a>              | 0.625 | -7.227  | 0.000150078 | 0.00361008  |
| 20478 | 10420023 | <a href="#">AB054001</a>           | <a href="#">85308</a>  | RIKEN cDNA 1500005A01 gene     | <a href="#">1500005A01Rik</a>      | 0.625 | -4.643  | 0.00218317  | 0.0231857   |
| 20479 | 10496796 | <a href="#">NM_138744</a>          | <a href="#">99167</a>  | synovial sarcoma, X breakpoint | <a href="#">Ssx2ip</a>             | 0.625 | -5.477  | 0.000839708 | 0.0115817   |
| 20480 | 10493259 | <a href="#">NM_025448</a>          | <a href="#">66256</a>  | signal sequence receptor, beta | <a href="#">Ssr2</a>               | 0.625 | -10.014 | 1.73266e-05 | 0.000855965 |
| 20481 | 10545409 | <a href="#">NM_016794</a>          | <a href="#">22320</a>  | vesicle-associated membrane pr | <a href="#">Vamp8</a>              | 0.624 | -7.574  | 0.000110825 | 0.00299652  |
| 20482 | 10497001 | <a href="#">NM_009968</a>          | <a href="#">12972</a>  | crystallin, zeta               | <a href="#">Cryz</a>               | 0.624 | -7.426  | 0.000125964 | 0.00322444  |
| 20483 | 10513190 | <a href="#">BC095953</a>           | <a href="#">242484</a> | RIKEN cDNA D630039A03 gene     | <a href="#">D630039A03Rik</a>      | 0.624 | -5.603  | 0.000733388 | 0.0106065   |
| 20484 | 10483163 | <a href="#">NM_016719</a>          | <a href="#">50915</a>  | growth factor receptor bound p | <a href="#">Grb14</a>              | 0.623 | -4.97   | 0.00148435  | 0.0172257   |
| 20485 | 10589695 | <a href="#">NM_153100</a>          | <a href="#">235636</a> | receptor transporter protein 3 | <a href="#">Rtp3</a>               | 0.623 | -6.871  | 0.00020732  | 0.00453465  |
| 20486 | 10503180 | <a href="#">NM_001081417</a>       | <a href="#">320790</a> | chromodomain helicase DNA bind | <a href="#">Chd7</a>               | 0.623 | -4.654  | 0.00215329  | 0.0229481   |
| 20487 | 10459183 | <a href="#">NM_007885</a>          | <a href="#">13521</a>  | solute carrier family 26 (sulf | <a href="#">Slc26a2</a>            | 0.622 | -8.476  | 5.2991e-05  | 0.00182186  |
| 20488 | 10505100 | <a href="#">NM_172528</a>          | <a href="#">214245</a> | lysine rich repeat containing  | <a href="#">Lrrc1</a>              | 0.622 | -6.082  | 0.000187115 | 0.00422226  |

|       |          |                                    |                           |                                 |                                    |       |         |             |             |
|-------|----------|------------------------------------|---------------------------|---------------------------------|------------------------------------|-------|---------|-------------|-------------|
| 20488 | 10393109 | <a href="#">NM_172228</a>          | <a href="#">214343</a>    | leucine rich repeat containing  | <a href="#">Ltrc1</a>              | 0.622 | -0.983  | 0.000187113 | 0.00422230  |
| 20489 | 10422822 | <a href="#">NM_013584</a>          | <a href="#">16880</a>     | leukemia inhibitory factor rec  | <a href="#">Lifr</a>               | 0.622 | -3.926  | 0.00537504  | 0.0435273   |
| 20490 | 10573626 | <a href="#">NM_173866</a>          | <a href="#">108682</a>    | glutamic pyruvate transaminase  | <a href="#">Gpt2</a>               | 0.622 | -5.971  | 0.000498331 | 0.00808259  |
| 20491 | 10606835 | <a href="#">NM_009749</a>          | <a href="#">12069</a>     | brain expressed X-linked 2      | <a href="#">Bex2</a>               | 0.622 | -9.594  | 2.31374e-05 | 0.00102993  |
| 20492 | 10345058 | <a href="#">NM_029398</a>          | <a href="#">75712</a>     | transmembrane protein 14A       | <a href="#">Tmem14a</a>            | 0.622 | -5.075  | 0.00131521  | 0.0159824   |
| 20493 | 10374840 |                                    |                           |                                 |                                    | 0.621 | -2.747  | 0.0278125   | 0.136658    |
| 20494 | 10397912 | <a href="#">AB257853</a>           | <a href="#">217843</a>    | RIKEN cDNA 9030205A07 Gene      | <a href="#">9030205A07Rik</a>      | 0.621 | -5.543  | 0.000781517 | 0.0110457   |
| 20495 | 10534021 | <a href="#">NM_001081388</a>       | <a href="#">231760</a>    | RIMS binding protein 2          | <a href="#">Rimbp2</a>             | 0.62  | -6.59   | 0.00027013  | 0.00533798  |
| 20496 | 10507218 | <a href="#">NM_021461</a>          | <a href="#">17346</a>     | MAP kinase-interacting serine/  | <a href="#">Mknk1</a>              | 0.62  | -8.206  | 6.56313e-05 | 0.00206812  |
| 20497 | 10581061 | <a href="#">NM_153582</a>          | <a href="#">97487</a>     | CKLF-like MARVEL transmembrane  | <a href="#">Cmtm4</a>              | 0.619 | -4.95   | 0.00151944  | 0.017575    |
| 20498 | 10546294 | <a href="#">NM_018815</a>          | <a href="#">54563</a>     | nucleoporin 210                 | <a href="#">Nup210</a>             | 0.618 | -9.772  | 2.0439e-05  | 0.000962498 |
| 20499 | 10466888 | <a href="#">NM_175459</a>          | <a href="#">226075</a>    | GLIS family zinc finger 3       | <a href="#">Glis3</a>              | 0.618 | -7.449  | 0.000123458 | 0.00318334  |
| 20500 | 10524844 | <a href="#">NM_001081308</a>       | <a href="#">330177</a>    | TAO kinase 3                    | <a href="#">Taok3</a>              | 0.618 | -5.533  | 0.000790265 | 0.011147    |
| 20501 | 10594812 | <a href="#">NM_008280</a>          | <a href="#">15450</a>     | lipase, hepatic                 | <a href="#">Lipc</a>               | 0.617 | -10.144 | 1.58699e-05 | 0.00081416  |
| 20502 | 10480921 | <a href="#">NM_153559</a>          | <a href="#">227638</a>    | quiescin Q6 sulfhydryl oxidase  | <a href="#">Qsox2</a>              | 0.617 | -6.647  | 0.000255708 | 0.00516956  |
| 20503 | 10505994 | <a href="#">NM_001113412</a>       | <a href="#">75578</a>     | FGGY carbohydrate kinase domain | <a href="#">Fgy</a>                | 0.617 | -2.381  | 0.047811    | 0.194851    |
| 20504 | 10519988 | <a href="#">NM_177869</a>          | <a href="#">330050</a>    | expressed sequence AI847670     | <a href="#">AI847670</a>           | 0.617 | -6.422  | 0.000317391 | 0.0059127   |
| 20505 | 10443898 | <a href="#">NM_134127</a>          | <a href="#">106648</a>    | cytochrome P450, family 4, sub  | <a href="#">Cyp4f15</a>            | 0.616 | -4.658  | 0.00214384  | 0.0228936   |
| 20506 | 10379321 | <a href="#">NM_175543</a>          | <a href="#">268451</a>    | RAB11 family interacting prote- | <a href="#">Rab11fip4</a>          | 0.616 | -4.751  | 0.00191724  | 0.0209391   |
| 20507 | 10571399 | <a href="#">NM_178395</a>          | <a href="#">70546</a>     | zinc finger, DHHC domain conta  | <a href="#">Zdhc2</a>              | 0.616 | -7.372  | 0.00013213  | 0.003318    |
| 20508 | 10368101 | <a href="#">NM_001033258</a>       | <a href="#">215821</a>    | DNA segment, Chr 10, Brigham &  | <a href="#">D10Bwg1379e</a>        | 0.615 | -5.288  | 0.00103451  | 0.0134277   |
| 20509 | 10492720 | <a href="#">NM_001081230</a>       | <a href="#">213582</a>    | microtubule-associated protein  | <a href="#">Mtap9</a>              | 0.615 | -4.792  | 0.00182654  | 0.0201672   |
| 20510 | 10495285 | <a href="#">NM_019972</a>          | <a href="#">20661</a>     | sortilin 1                      | <a href="#">Sort1</a>              | 0.615 | -9.415  | 2.62771e-05 | 0.00112698  |
| 20511 | 10509577 | <a href="#">NM_011109</a>          | <a href="#">18782</a>     | phospholipase A2, group IID     | <a href="#">Pla2g2d</a>            | 0.615 | -8.036  | 7.5303e-05  | 0.00228437  |
| 20512 | 10514255 | <a href="#">NM_027326</a>          | <a href="#">70122</a>     | myeloid/lymphoid or mixed-line  | <a href="#">Mllt3</a>              | 0.614 | -3.57   | 0.00865041  | 0.0611925   |
| 20513 | 10440738 | <a href="#">NM_009384</a>          | <a href="#">21844</a>     | T-cell lymphoma invasion and m  | <a href="#">Tiam1</a>              | 0.613 | -5.357  | 0.000957914 | 0.0127224   |
| 20514 | 10369842 | <a href="#">ENSMUST00000099633</a> | <a href="#">75189</a>     | RIKEN cDNA 4930533K18 gene      | <a href="#">4930533K18Rik</a>      | 0.613 | -3.017  | 0.0187939   | 0.105238    |
| 20515 | 10417053 | <a href="#">NM_175341</a>          | <a href="#">105559</a>    | muscleblind-like 2              | <a href="#">Mbnl2</a>              | 0.612 | -9.292  | 2.87008e-05 | 0.00119931  |
| 20516 | 10395155 | <a href="#">BC085288</a>           | <a href="#">104943</a>    | RIKEN cDNA 9030611O19 gene      | <a href="#">9030611O19Rik</a>      | 0.612 | -5.644  | 0.000701407 | 0.0102776   |
| 20517 | 10559796 | <a href="#">NM_008817</a>          | <a href="#">18616</a>     | paternally expressed 3          | <a href="#">Peg3</a>               | 0.612 | -6.214  | 0.000389776 | 0.00679985  |
| 20518 | 10441864 | <a href="#">NM_010806</a>          | <a href="#">17356</a>     | myeloid/lymphoid or mixed-line  | <a href="#">Mllt4</a>              | 0.612 | -9.477  | 2.51471e-05 | 0.00108971  |
| 20519 | 10541260 | <a href="#">ENSMUST00000112686</a> | <a href="#">330409</a>    | cat eye syndrome chromosome re  | <a href="#">Cecr2</a>              | 0.612 | -8.574  | 4.91178e-05 | 0.0017223   |
| 20520 | 10399691 | <a href="#">NM_010496</a>          | <a href="#">15902</a>     | inhibitor of DNA binding 2      | <a href="#">Id2</a>                | 0.612 | -7.799  | 9.16544e-05 | 0.00263665  |
| 20521 | 10576844 | <a href="#">NM_207203</a>          | <a href="#">73072</a>     | cDNA sequence BC068157          | <a href="#">BC068157</a>           | 0.611 | -6.214  | 0.000389691 | 0.00679985  |
| 20522 | 10590383 | <a href="#">NM_026794</a>          | <a href="#">26901</a>     | differentially expressed in B1  | <a href="#">Deb1</a>               | 0.61  | -8.708  | 4.42859e-05 | 0.00160339  |
| 20523 | 10437516 | <a href="#">NM_008909</a>          | <a href="#">19041</a>     | periplakin                      | <a href="#">Ppl</a>                | 0.61  | -7.475  | 0.000120708 | 0.00314805  |
| 20524 | 10598863 | <a href="#">NM_009060</a>          | <a href="#">19733</a>     | regucalcin                      | <a href="#">Rgn</a>                | 0.61  | -5.004  | 0.0014271   | 0.0168385   |
| 20525 | 10498350 | <a href="#">NM_133200</a>          | <a href="#">140795</a>    | purinergic receptor P2Y, G-pro  | <a href="#">P2ry14</a>             | 0.61  | -5.327  | 0.000989951 | 0.013009    |
| 20526 | 10459655 | <a href="#">NM_011972</a>          | <a href="#">26447</a>     | polymerase (DNA directed), iot  | <a href="#">Poli</a>               | 0.609 | -8.674  | 4.54804e-05 | 0.00163822  |
| 20527 | 10441270 | <a href="#">NM_023663</a>          | <a href="#">72388</a>     | receptor-interacting serine-th  | <a href="#">Ripk4</a>              | 0.609 | -5.221  | 0.0011145   | 0.0141447   |
| 20528 | 10452721 | <a href="#">AK032413</a>           | <a href="#">68789</a>     | RIKEN cDNA 1110039F03 gene      | <a href="#">1110039F03Rik</a>      | 0.609 | -5.442  | 0.000873029 | 0.0119016   |
| 20529 | 10513160 | <a href="#">ENSMUST00000075637</a> | <a href="#">545622</a>    | protein tyrosine phosphatase,   | <a href="#">Ptpn3</a>              | 0.609 | -5.97   | 0.000498769 | 0.00808259  |
| 20530 | 10457820 | <a href="#">NM_199024</a>          | <a href="#">319211</a>    | nucleolar protein 4             | <a href="#">Nol4</a>               | 0.608 | -4.023  | 0.00473994  | 0.0396916   |
| 20531 | 10531869 | <a href="#">NM_009158</a>          | <a href="#">26414</a>     | mitogen-activated protein kina  | <a href="#">Mapk10</a>             | 0.607 | -5.352  | 0.00096385  | 0.0127933   |
| 20532 | 10469936 | <a href="#">NM_025980</a>          | <a href="#">67122</a>     | Notch-regulated ankyrin repeat  | <a href="#">Nrarp</a>              | 0.607 | -2.852  | 0.0238615   | 0.123326    |
| 20533 | 10396669 | <a href="#">ENSMUST00000101281</a> | <a href="#">100038469</a> | predicted gene, ENSMUSG0000007  | <a href="#">ENSMUSG00000073000</a> | 0.606 | -4.606  | 0.00228328  | 0.0239354   |
| 20534 | 10520753 | <a href="#">NM_027221</a>          | <a href="#">69815</a>     | keratinocyte associated protei  | <a href="#">Krtcap3</a>            | 0.606 | -5.544  | 0.00078131  | 0.0110457   |
| 20535 | 10523365 | <a href="#">NM_053158</a>          | <a href="#">94061</a>     | mitochondrial ribosomal protei  | <a href="#">Mrpl1</a>              | 0.606 | -10.069 | 1.66948e-05 | 0.00083847  |
| 20536 | 10388880 | <a href="#">NM_133706</a>          | <a href="#">69071</a>     | transmembrane protein 97        | <a href="#">Tmem97</a>             | 0.606 | -6.975  | 0.000188401 | 0.00422741  |

|       |          |                                     |                        |                                 |                               |       |         |             |             |
|-------|----------|-------------------------------------|------------------------|---------------------------------|-------------------------------|-------|---------|-------------|-------------|
| 20537 | 10548761 | <a href="#">NM_013546</a>           | <a href="#">15199</a>  | heme binding protein 1          | <a href="#">Hebp1</a>         | 0.605 | -8.098  | 7.1617e-05  | 0.00220739  |
| 20538 | 10391146 | <a href="#">NM_134037</a>           | <a href="#">104112</a> | ATP citrate lyase               | <a href="#">Acly</a>          | 0.605 | -9.879  | 1.89852e-05 | 0.000914403 |
| 20539 | 10494043 | <a href="#">NM_028307</a>           | <a href="#">72634</a>  | tudor and KH domain containing  | <a href="#">Tdrkh</a>         | 0.605 | -8.219  | 6.49278e-05 | 0.00206063  |
| 20540 | 10581645 | <a href="#">NM_028584</a>           | <a href="#">73608</a>  | MARVEL (membrane-associating)   | <a href="#">Marveld3</a>      | 0.605 | -6.487  | 0.000298235 | 0.00570669  |
| 20541 | 10501971 | <a href="#">NM_178655</a>           | <a href="#">109676</a> | ankyrin 2, brain                | <a href="#">Ank2</a>          | 0.605 | -7.004  | 0.000183477 | 0.00418043  |
| 20542 | 10565456 | <a href="#">NM_029614</a>           | <a href="#">76453</a>  | protease, serine, 23            | <a href="#">Prss23</a>        | 0.604 | -5.215  | 0.00112227  | 0.0142129   |
| 20543 | 10398416 |                                     |                        |                                 |                               | 0.604 | -2.638  | 0.0326219   | 0.151829    |
| 20544 | 10588883 | <a href="#">NM_001013814</a>        | <a href="#">434437</a> | aminomethyltransferase          | <a href="#">Amt</a>           | 0.604 | -3.954  | 0.00518573  | 0.0423021   |
| 20545 | 10472820 | <a href="#">NM_008397</a>           | <a href="#">16403</a>  | integrin alpha 6                | <a href="#">Itga6</a>         | 0.603 | -4.895  | 0.00161897  | 0.0184239   |
| 20546 | 10410317 | <a href="#">NM_177811</a>           | <a href="#">328274</a> | zinc finger protein 459         | <a href="#">Zfp459</a>        | 0.603 | -3.392  | 0.0110576   | 0.0726995   |
| 20547 | 10497663 | <a href="#">NM_172861</a>           | <a href="#">241919</a> | solute carrier family 7 (catio  | <a href="#">Slc7a14</a>       | 0.603 | -5.306  | 0.00101401  | 0.0132839   |
| 20548 | 10481804 | <a href="#">NM_175211</a>           | <a href="#">241308</a> | Ral GEF with PH domain and SH3  | <a href="#">Ralgps1</a>       | 0.603 | -5.01   | 0.00141643  | 0.0167544   |
| 20549 | 10407435 | <a href="#">NM_134066</a>           | <a href="#">105349</a> | aldo-keto reductase family 1,   | <a href="#">Akr1c18</a>       | 0.602 | -4.503  | 0.0025876   | 0.0260286   |
| 20550 | 10496169 | <a href="#">NM_146141</a>           | <a href="#">74776</a>  | pyrophosphatase (inorganic) 2   | <a href="#">Ppa2</a>          | 0.602 | -9.94   | 1.82182e-05 | 0.000887571 |
| 20551 | 10425321 | <a href="#">NM_030255</a>           | <a href="#">80287</a>  | apolipoprotein B editing compl  | <a href="#">Apobec3</a>       | 0.602 | -7.386  | 0.000130506 | 0.00329708  |
| 20552 | 10390860 | <a href="#">NM_033373</a>           | <a href="#">94179</a>  | keratin 23                      | <a href="#">Krt23</a>         | 0.602 | -7.802  | 9.13772e-05 | 0.00263226  |
| 20553 | 10355662 | <a href="#">NM_021541</a>           | <a href="#">12958</a>  | crystallin, beta A2             | <a href="#">Cryba2</a>        | 0.602 | -5.734  | 0.000637707 | 0.00962378  |
| 20554 | 10398360 |                                     |                        |                                 |                               | 0.601 | -3.671  | 0.00755021  | 0.0557797   |
| 20555 | 10475653 | <a href="#">NM_011978</a>           | <a href="#">26458</a>  | solute carrier family 27 (fatt  | <a href="#">Slc27a2</a>       | 0.601 | -7.748  | 9.56617e-05 | 0.00271766  |
| 20556 | 10597531 | <a href="#">NM_178660</a>           | <a href="#">207181</a> | RNA binding motif, single stra  | <a href="#">Rbms3</a>         | 0.6   | -5.267  | 0.00105883  | 0.0136846   |
| 20557 | 10600205 | <a href="#">NM_029352</a>           | <a href="#">75590</a>  | dual specificity phosphatase 9  | <a href="#">Dusp9</a>         | 0.6   | -12.113 | 4.70623e-06 | 0.000367274 |
| 20558 | 10379223 | <a href="#">NM_001076681</a>        | <a href="#">66274</a>  | RIKEN cDNA 1810012P15 gene      | <a href="#">1810012P15Rik</a> | 0.598 | -6.846  | 0.000212229 | 0.00460715  |
| 20559 | 10478389 | <a href="#">NM_008261</a>           | <a href="#">15378</a>  | hepatic nuclear factor 4, alph  | <a href="#">Hnf4a</a>         | 0.598 | -6.13   | 0.000423806 | 0.00721493  |
| 20560 | 10429140 | <a href="#">NM_008681</a>           | <a href="#">17988</a>  | N-myc downstream regulated gen  | <a href="#">Ndrp1</a>         | 0.597 | -6.972  | 0.000188938 | 0.00422741  |
| 20561 | 10440037 | <a href="#">NM_023175</a>           | <a href="#">52633</a>  | nitrilase family, member 2      | <a href="#">Nit2</a>          | 0.597 | -6.592  | 0.000269516 | 0.00533798  |
| 20562 | 10363856 | <a href="#">ENSMUST00000020090</a>  | <a href="#">69563</a>  | RIKEN cDNA 2310015B20 gene      | <a href="#">2310015B20Rik</a> | 0.597 | -3.544  | 0.00897412  | 0.0628593   |
| 20563 | 10377253 | <a href="#">ENSMUST00000068548</a>  | <a href="#">72804</a>  | RIKEN cDNA 9130017K11 gene      | <a href="#">9130017K11Rik</a> | 0.597 | -4.001  | 0.00487504  | 0.040518    |
| 20564 | 10546855 | <a href="#">NM_080448</a>           | <a href="#">259302</a> | SLIT-ROBO Rho GTPase activatin  | <a href="#">Srgap3</a>        | 0.597 | -7.09   | 0.000169766 | 0.0039593   |
| 20565 | 10344803 | <a href="#">NM_026493</a>           | <a href="#">211660</a> | centrosome and spindle pole as  | <a href="#">Cspp1</a>         | 0.596 | -5.522  | 0.000800251 | 0.0112279   |
| 20566 | 10501229 | <a href="#">NM_010358</a>           | <a href="#">14862</a>  | glutathione S-transferase, mu   | <a href="#">Gstm1</a>         | 0.596 | -4.555  | 0.00242974  | 0.0249511   |
| 20567 | 10442643 | <a href="#">NM_019730</a>           | <a href="#">79059</a>  | non-metastatic cells 3, protei  | <a href="#">Nme3</a>          | 0.595 | -8.699  | 4.45954e-05 | 0.00161184  |
| 20568 | 10351269 | <a href="#">BC048086</a>            | <a href="#">74895</a>  | RIKEN cDNA 4930455F23 gene      | <a href="#">4930455F23Rik</a> | 0.594 | -6.577  | 0.000273289 | 0.00537028  |
| 20569 | 10564211 | <a href="#">NM_013670</a>           | <a href="#">20646</a>  | small nuclear ribonucleoprotei  | <a href="#">Snrpn</a>         | 0.593 | -10.316 | 1.41532e-05 | 0.000751899 |
| 20570 | 10497580 |                                     |                        |                                 |                               | 0.593 | -3.271  | 0.0130933   | 0.0819555   |
| 20571 | 10491789 | <a href="#">NM_011020</a>           | <a href="#">18113</a>  | heat shock protein 7 like       | <a href="#">Hspd1</a>         | 0.592 | -6.932  | 0.00046803  | 0.00769311  |
| 20572 | 10435802 | <a href="#">ENSMUST00000023385</a>  | <a href="#">21213</a>  | RIKEN cDNA 2610015P09 gene      | <a href="#">2610015P09Rik</a> | 0.592 | -6.919  | 4.59297e-05 | 0.00169396  |
| 20573 | 10371356 | <a href="#">NM_145220</a>           | <a href="#">216190</a> | adaptor protein, phosphotyrosi  | <a href="#">Appl2</a>         | 0.592 | -6.206  | 0.000392901 | 0.00683183  |
| 20574 | 10503188 | <a href="#">NM_001081417</a>        | <a href="#">320790</a> | chromodomain helicase DNA bind  | <a href="#">Chd7</a>          | 0.591 | -7.208  | 0.000152696 | 0.00365639  |
| 20575 | 10587871 | <a href="#">NM_198414</a>           | <a href="#">75552</a>  | progesterin and adipoQ receptor | <a href="#">Paqr9</a>         | 0.591 | -6.384  | 0.000329636 | 0.00606072  |
| 20576 | 10505028 | <a href="#">AK141895</a>            | <a href="#">100434</a> | solute carrier family 44, memb  | <a href="#">Slc44a1</a>       | 0.59  | -9.663  | 2.20513e-05 | 0.00100703  |
| 20577 | 10350630 | <a href="#">NM_022018</a>           | <a href="#">63913</a>  | niban protein                   | <a href="#">Niban</a>         | 0.59  | -3.431  | 0.0104825   | 0.0702      |
| 20578 | 10416899 | <a href="#">NM_029561</a>           | <a href="#">76273</a>  | Nedd4 family interacting prote  | <a href="#">Ndfip2</a>        | 0.59  | -9.327  | 2.79798e-05 | 0.00118321  |
| 20579 | 10542340 | <a href="#">ENSMUST000000111915</a> | <a href="#">74525</a>  | RIKEN cDNA 8430419L09 gene      | <a href="#">8430419L09Rik</a> | 0.59  | -5.084  | 0.0013021   | 0.0158638   |
| 20580 | 10604906 | <a href="#">NM_010498</a>           | <a href="#">15931</a>  | iduronate 2-sulfatase           | <a href="#">Ids</a>           | 0.589 | -4.67   | 0.002112    | 0.022662    |
| 20581 | 10582778 |                                     |                        |                                 |                               | 0.588 | -6.352  | 0.000340156 | 0.00617891  |
| 20582 | 10547030 | <a href="#">NM_001101431</a>        | <a href="#">70291</a>  | RIKEN cDNA 2510049J12 gene      | <a href="#">2510049J12Rik</a> | 0.588 | -5.732  | 0.000639332 | 0.00962823  |
| 20583 | 10355403 | <a href="#">NM_010233</a>           | <a href="#">14268</a>  | fibronectin 1                   | <a href="#">Fn1</a>           | 0.588 | -8.289  | 6.14329e-05 | 0.00200144  |
| 20584 | 10601303 | <a href="#">NM_009767</a>           | <a href="#">12212</a>  | cysteine-rich hydrophobic doma  | <a href="#">Chic1</a>         | 0.587 | -10.464 | 1.28494e-05 | 0.000712974 |
| 20585 | 10387648 | <a href="#">NM_001033433</a>        | <a href="#">380705</a> | transmembrane protein 102       | <a href="#">Tmem102</a>       | 0.587 | -4.436  | 0.00281078  | 0.0276039   |
| 20586 | 10538000 | <a href="#">NM_001102157</a>        | <a href="#">74051</a>  | transmembrane protein with 10   | <a href="#">Tmem10</a>        | 0.586 | -5.505  | 0.00073060  | 0.0106685   |

|       |          |                                    |                        |                                |                               |       |         |             |             |
|-------|----------|------------------------------------|------------------------|--------------------------------|-------------------------------|-------|---------|-------------|-------------|
| 20586 | 10528008 | <a href="#">NM_001103127</a>       | <a href="#">14051</a>  | six transmembrane epitelial a  | <a href="#">Steap2</a>        | 0.580 | -5.393  | 0.00073969  | 0.0106085   |
| 20587 | 10382980 | <a href="#">NM_009304</a>          | <a href="#">20973</a>  | synaptogyrin 2                 | <a href="#">Syngr2</a>        | 0.586 | -7.553  | 0.00011284  | 0.00301249  |
| 20588 | 10458430 | <a href="#">NM_007858</a>          | <a href="#">13367</a>  | diaphanous homolog 1 (Drosophi | <a href="#">Diap1</a>         | 0.585 | -9.303  | 2.84686e-05 | 0.0011967   |
| 20589 | 10390635 | <a href="#">NM_025559</a>          | <a href="#">103742</a> | RIKEN cDNA 1810046J19 gene     | <a href="#">1810046J19Rik</a> | 0.585 | -7.825  | 8.96358e-05 | 0.00260359  |
| 20590 | 10591754 | <a href="#">NM_181419</a>          | <a href="#">235048</a> | cDNA sequence BC050092         | <a href="#">BC050092</a>      | 0.585 | -8.923  | 3.76643e-05 | 0.00142276  |
| 20591 | 10515894 | <a href="#">NM_029286</a>          | <a href="#">73332</a>  | RIKEN cDNA 1700041C02 gene     | <a href="#">1700041C02Rik</a> | 0.585 | -7.057  | 0.000174858 | 0.00404951  |
| 20592 | 10503196 | <a href="#">NM_001081417</a>       | <a href="#">320790</a> | chromodomain helicase DNA bind | <a href="#">Chd7</a>          | 0.584 | -5.196  | 0.00114695  | 0.014461    |
| 20593 | 10414514 | <a href="#">NM_013632</a>          | <a href="#">18950</a>  | purine-nucleoside phosphorylas | <a href="#">Pnp1</a>          | 0.582 | -5.262  | 0.00106441  | 0.0137094   |
| 20594 | 10512067 | <a href="#">NM_172689</a>          | <a href="#">230073</a> | DEAD (Asp-Glu-Ala-Asp) box pol | <a href="#">Ddx58</a>         | 0.582 | -4.795  | 0.00182057  | 0.0201329   |
| 20595 | 10437195 | <a href="#">NM_028078</a>          | <a href="#">72058</a>  | immunoglobulin superfamily, me | <a href="#">Igsf5</a>         | 0.582 | -7.487  | 0.000119479 | 0.00312656  |
| 20596 | 10415725 | <a href="#">ENSMUST00000022566</a> | <a href="#">219140</a> | spermatogenesis associated 13  | <a href="#">Spata13</a>       | 0.582 | -6.254  | 0.000374513 | 0.00659985  |
| 20597 | 10406782 | <a href="#">ENSMUST00000042517</a> | <a href="#">320557</a> | RIKEN cDNA B230112C05 gene     | <a href="#">B230112C05Rik</a> | 0.582 | -5.15   | 0.00120707  | 0.0150621   |
| 20598 | 10380381 | <a href="#">NM_009427</a>          | <a href="#">22057</a>  | transducer of ErbB-2.1         | <a href="#">Tob1</a>          | 0.581 | -8.412  | 5.57418e-05 | 0.00186897  |
| 20599 | 10492628 | <a href="#">NM_009250</a>          | <a href="#">20713</a>  | serine (or cysteine) peptidase | <a href="#">Serpini1</a>      | 0.581 | -2.334  | 0.0512444   | 0.204475    |
| 20600 | 10523190 | <a href="#">BC006604</a>           | <a href="#">231440</a> | RIKEN cDNA 9130213B05 gene     | <a href="#">9130213B05Rik</a> | 0.581 | -5.203  | 0.00113711  | 0.0143799   |
| 20601 | 10483046 | <a href="#">NM_010074</a>          | <a href="#">13482</a>  | dipeptidylpeptidase 4          | <a href="#">Dpp4</a>          | 0.581 | -3.617  | 0.00811849  | 0.0585528   |
| 20602 | 10476648 | <a href="#">NM_019771</a>          | <a href="#">56431</a>  | destrin                        | <a href="#">Dstn</a>          | 0.581 | -4.115  | 0.00420924  | 0.036179    |
| 20603 | 10401454 | <a href="#">NM_001026214</a>       | <a href="#">12499</a>  | ectonucleoside triphosphate di | <a href="#">Entpd5</a>        | 0.581 | -6.08   | 0.000445977 | 0.00747798  |
| 20604 | 10344805 | <a href="#">NM_026493</a>          | <a href="#">211660</a> | centrosome and spindle pole as | <a href="#">Csppl</a>         | 0.581 | -5.67   | 0.000682182 | 0.0100727   |
| 20605 | 10462507 | <a href="#">NM_011864</a>          | <a href="#">23972</a>  | 3'-phosphoadenosine 5'-phospho | <a href="#">Papss2</a>        | 0.58  | -4.646  | 0.00217446  | 0.0231388   |
| 20606 | 10373950 | <a href="#">NM_008698</a>          | <a href="#">18082</a>  | 4-nitrophenylphosphatase domai | <a href="#">Nipsnap1</a>      | 0.58  | -8.218  | 6.50039e-05 | 0.00206063  |
| 20607 | 10521907 | <a href="#">ENSMUST00000073903</a> | <a href="#">66278</a>  | RIKEN cDNA 1810013D10 gene     | <a href="#">1810013D10Rik</a> | 0.58  | -6.606  | 0.000266003 | 0.00529601  |
| 20608 | 10447732 | <a href="#">NM_027032</a>          | <a href="#">69310</a>  | Park2 co-regulated             | <a href="#">Pacrg</a>         | 0.579 | -7.146  | 0.000161406 | 0.00382954  |
| 20609 | 10408335 | <a href="#">NM_172532</a>          | <a href="#">214579</a> | aldehyde dehydrogenase family  | <a href="#">Aldh5a1</a>       | 0.579 | -8.242  | 6.37787e-05 | 0.0020557   |
| 20610 | 10439542 | <a href="#">NM_001007460</a>       | <a href="#">332175</a> | zinc finger, DHHC domain conta | <a href="#">Zdhhc23</a>       | 0.578 | -3.386  | 0.0111553   | 0.0730917   |
| 20611 | 10396314 | <a href="#">NM_030070</a>          | <a href="#">78257</a>  | leucine rich repeat containing | <a href="#">Lrrc9</a>         | 0.578 | -3.558  | 0.00879546  | 0.0620111   |
| 20612 | 10469404 | <a href="#">NM_023116</a>          | <a href="#">12296</a>  | calcium channel, voltage-depen | <a href="#">Cacnb2</a>        | 0.578 | -6.214  | 0.000389649 | 0.00679985  |
| 20613 | 10546454 | <a href="#">NM_175314</a>          | <a href="#">101401</a> | a disintegrin-like and metallo | <a href="#">Adamts9</a>       | 0.577 | -4.794  | 0.00182336  | 0.0201427   |
| 20614 | 10346168 | <a href="#">NM_011487</a>          | <a href="#">20849</a>  | signal transducer and activato | <a href="#">Stat4</a>         | 0.577 | -6.112  | 0.000431529 | 0.00729643  |
| 20615 | 10506929 | <a href="#">NM_001033226</a>       | <a href="#">108802</a> | calreticulin 4                 | <a href="#">Calr4</a>         | 0.577 | -4.498  | 0.00260369  | 0.0261283   |
| 20616 | 10344750 | <a href="#">NM_133220</a>          | <a href="#">170755</a> | serum/glucocorticoid regulated | <a href="#">Sgk3</a>          | 0.576 | -5.523  | 0.000798827 | 0.0112154   |
| 20617 | 10569848 | <a href="#">NM_011503</a>          | <a href="#">20911</a>  | syntaxin binding protein 2     | <a href="#">Stxbp2</a>        | 0.576 | -9.964  | 1.79198e-05 | 0.000875051 |
| 20618 | 10389590 | <a href="#">NM_025638</a>          | <a href="#">66569</a>  | glycerophosphodiester phosphod | <a href="#">Gdgd1</a>         | 0.575 | -3.323  | 0.0121674   | 0.0775627   |
| 20619 | 10427862 | <a href="#">NM_007666</a>          | <a href="#">12563</a>  | cadherin 6                     | <a href="#">Cdh6</a>          | 0.575 | -6.054  | 0.000457826 | 0.00760508  |
| 20620 | 10509063 | <a href="#">NM_178257</a>          | <a href="#">230828</a> | interleukin 22 receptor, alpha | <a href="#">Il22ra1</a>       | 0.575 | -7.325  | 0.000137617 | 0.00341122  |
| 20621 | 10388430 | <a href="#">NM_011340</a>          | <a href="#">20317</a>  | serine (or cysteine) peptidase | <a href="#">Serpinf1</a>      | 0.574 | -12.048 | 4.88317e-06 | 0.000371402 |
| 20622 | 10543031 | <a href="#">NM_015829</a>          | <a href="#">50799</a>  | solute carrier family 25 (mito | <a href="#">Slc25a13</a>      | 0.573 | -7.237  | 0.000148829 | 0.00359228  |
| 20623 | 10578300 | <a href="#">NM_001040699</a>       | <a href="#">54384</a>  | myotubularin related protein 7 | <a href="#">Mtmr7</a>         | 0.573 | -7.224  | 0.000150463 | 0.00361522  |
| 20624 | 10559580 | <a href="#">NM_016908</a>          | <a href="#">53420</a>  | synaptotagmin V                | <a href="#">Syt5</a>          | 0.573 | -7.608  | 0.000107669 | 0.00292993  |
| 20625 | 10380260 | <a href="#">NM_009546</a>          | <a href="#">217069</a> | tripartite motif-containing 25 | <a href="#">Trim25</a>        | 0.573 | -9.745  | 2.08277e-05 | 0.000974293 |
| 20626 | 10582275 | <a href="#">NM_011404</a>          | <a href="#">20539</a>  | solute carrier family 7 (catio | <a href="#">Slc7a5</a>        | 0.572 | -5.88   | 0.000547557 | 0.00862067  |
| 20627 | 10399178 | <a href="#">NM_146040</a>          | <a href="#">217946</a> | cell division cycle associated | <a href="#">Cdca7l</a>        | 0.572 | -9.044  | 3.44205e-05 | 0.00135203  |
| 20628 | 10585331 | <a href="#">NM_176846</a>          | <a href="#">320051</a> | exophilin 5                    | <a href="#">Exph5</a>         | 0.572 | -5.284  | 0.0010389   | 0.0134764   |
| 20629 | 10372583 | <a href="#">NM_001003950</a>       | <a href="#">216363</a> | RAB3A interacting protein      | <a href="#">Rab3ip</a>        | 0.57  | -14.534 | 1.32413e-06 | 0.000163727 |
| 20630 | 10553354 | <a href="#">NM_175272</a>          | <a href="#">78286</a>  | neuron navigator 2             | <a href="#">Nav2</a>          | 0.57  | -7.14   | 0.000162277 | 0.00383373  |
| 20631 | 10593413 | <a href="#">BC027409</a>           | <a href="#">66952</a>  | RIKEN cDNA 2310030G06 gene     | <a href="#">2310030G06Rik</a> | 0.57  | -6.774  | 0.000226901 | 0.0047976   |
| 20632 | 10578810 | <a href="#">NM_007711</a>          | <a href="#">12725</a>  | chloride channel 3             | <a href="#">Clcn3</a>         | 0.57  | -10.395 | 1.34441e-05 | 0.000728876 |
| 20633 | 10604447 | <a href="#">NM_181751</a>          | <a href="#">236781</a> | G-protein coupled receptor 119 | <a href="#">Gpr119</a>        | 0.569 | -8.935  | 3.73217e-05 | 0.00142276  |
| 20634 | 10463140 | <a href="#">NM_172154</a>          | <a href="#">212391</a> | ligand dependent nuclear recep | <a href="#">Lcor</a>          | 0.569 | -10.611 | 1.1686e-05  | 0.000668901 |

|       |          |                                    |                           |                                |                                    |       |         |             |             |
|-------|----------|------------------------------------|---------------------------|--------------------------------|------------------------------------|-------|---------|-------------|-------------|
| 20635 | 10497608 | <a href="#">NM_021442</a>          | <a href="#">17251</a>     | myelodysplasia syndrome 1 homo | <a href="#">Mds1</a>               | 0.569 | -4.137  | 0.00409319  | 0.0355426   |
| 20636 | 10351224 | <a href="#">NM_007976</a>          | <a href="#">14067</a>     | coagulation factor V           | <a href="#">F5</a>                 | 0.569 | -6.036  | 0.00046635  | 0.0076855   |
| 20637 | 10458245 |                                    |                           |                                |                                    | 0.568 | -2.887  | 0.0226837   | 0.11925     |
| 20638 | 10381118 | <a href="#">NM_010257</a>          | <a href="#">14459</a>     | gastrin                        | <a href="#">Gast</a>               | 0.568 | -7.806  | 9.10703e-05 | 0.002627    |
| 20639 | 10592336 | <a href="#">NM_011449</a>          | <a href="#">20686</a>     | sperm autoantigenic protein 17 | <a href="#">Spa17</a>              | 0.568 | -7.742  | 9.61072e-05 | 0.00272092  |
| 20640 | 10358816 | <a href="#">NM_010683</a>          | <a href="#">226519</a>    | laminin, gamma 1               | <a href="#">Lamc1</a>              | 0.568 | -6.046  | 0.000461799 | 0.00764028  |
| 20641 | 10553197 | <a href="#">ENSMUST00000063311</a> | <a href="#">791374</a>    | predicted gene, ENSMUSG0000005 | <a href="#">ENSMUSG00000051803</a> | 0.568 | -5.456  | 0.000859212 | 0.0117587   |
| 20642 | 10604393 | <a href="#">NM_019680</a>          | <a href="#">56501</a>     | E74-like factor 4 (ets domain  | <a href="#">Elf4</a>               | 0.567 | -7.414  | 0.000127294 | 0.00324668  |
| 20643 | 10540207 | <a href="#">ENSMUST00000057977</a> | <a href="#">74516</a>     | RIKEN cDNA A730049H05 gene     | <a href="#">A730049H05Rik</a>      | 0.566 | -6.221  | 0.00038721  | 0.00677185  |
| 20644 | 10534102 | <a href="#">NM_010368</a>          | <a href="#">110006</a>    | glucuronidase, beta            | <a href="#">Gusb</a>               | 0.566 | -8.739  | 4.32569e-05 | 0.00157694  |
| 20645 | 10378749 | <a href="#">NM_198637</a>          | <a href="#">74230</a>     | RIKEN cDNA 1700016K19 gene     | <a href="#">1700016K19Rik</a>      | 0.566 | -4.254  | 0.00352496  | 0.0319194   |
| 20646 | 10545041 | <a href="#">NM_021432</a>          | <a href="#">58243</a>     | nucleosome assembly protein 1- | <a href="#">Nap115</a>             | 0.566 | -6.251  | 0.000375661 | 0.00661363  |
| 20647 | 10494208 | <a href="#">BC094388</a>           | <a href="#">75007</a>     | RIKEN cDNA 4930504E06 gene     | <a href="#">4930504E06Rik</a>      | 0.566 | -7.525  | 0.000115657 | 0.00306446  |
| 20648 | 10457733 | <a href="#">NM_019737</a>          | <a href="#">56386</a>     | UDP-Gal:betaGlcNAc beta 1,4-ga | <a href="#">B4galt6</a>            | 0.565 | -7.184  | 0.000155954 | 0.00371759  |
| 20649 | 10393573 | <a href="#">NM_011150</a>          | <a href="#">19039</a>     | lectin, galactoside-binding, s | <a href="#">Lgals3bp</a>           | 0.565 | -4.423  | 0.00285377  | 0.0279433   |
| 20650 | 10572024 | <a href="#">NM_023689</a>          | <a href="#">72902</a>     | sparc/osteonectin, cwcv and ka | <a href="#">Spock3</a>             | 0.565 | -6.284  | 0.000363577 | 0.0064655   |
| 20651 | 10585005 | <a href="#">NM_009692</a>          | <a href="#">11806</a>     | apolipoprotein A-I             | <a href="#">Apoa1</a>              | 0.565 | -5.072  | 0.00131892  | 0.016018    |
| 20652 | 10349694 | <a href="#">NM_178079</a>          | <a href="#">212933</a>    | peptidase M20 domain containin | <a href="#">Pm20d1</a>             | 0.565 | -7.556  | 0.000112553 | 0.00301032  |
| 20653 | 10447100 | <a href="#">NM_194269</a>          | <a href="#">378462</a>    | MORN repeat containing 2       | <a href="#">Morn2</a>              | 0.563 | -6.502  | 0.000293908 | 0.00565571  |
| 20654 | 10486201 | <a href="#">ENSMUST00000099535</a> | <a href="#">100038511</a> | predicted gene, OTTMUSG0000001 | <a href="#">OTTMUSG00000015946</a> | 0.561 | -6.453  | 0.000308046 | 0.00580546  |
| 20655 | 10384138 | <a href="#">NM_134020</a>          | <a href="#">103694</a>    | transmembrane emp24 protein tr | <a href="#">Tmed4</a>              | 0.561 | -8.144  | 6.89794e-05 | 0.0021417   |
| 20656 | 10422280 | <a href="#">NM_001033336</a>       | <a href="#">239273</a>    | ATP-binding cassette, sub-fami | <a href="#">Abcc4</a>              | 0.561 | -6.222  | 0.000386806 | 0.00677039  |
| 20657 | 10497548 | <a href="#">NM_173182</a>          | <a href="#">72007</a>     | fibronectin type III domain co | <a href="#">Fndc3b</a>             | 0.56  | -5.06   | 0.00133834  | 0.0161873   |
| 20658 | 10351430 | <a href="#">NM_009107</a>          | <a href="#">20183</a>     | retinoid X receptor gamma      | <a href="#">Rrxg</a>               | 0.559 | -5.589  | 0.000744339 | 0.0107136   |
| 20659 | 10483131 | <a href="#">NM_133207</a>          | <a href="#">170738</a>    | potassium voltage-gated channe | <a href="#">Kenh7</a>              | 0.559 | -4.384  | 0.00299809  | 0.028736    |
| 20660 | 10487476 | <a href="#">BC116797</a>           | <a href="#">67885</a>     | RIKEN cDNA 1500011K16 gene     | <a href="#">1500011K16Rik</a>      | 0.558 | -5.34   | 0.000976068 | 0.0128727   |
| 20661 | 10396610 | <a href="#">NM_138745</a>          | <a href="#">108156</a>    | methylenetetrahydrofolate dehy | <a href="#">Mthfd1</a>             | 0.558 | -7.911  | 8.34572e-05 | 0.00245807  |
| 20662 | 10603051 | <a href="#">NM_026887</a>          | <a href="#">108012</a>    | adaptor-related protein comple | <a href="#">Apl1s2</a>             | 0.558 | -6.798  | 0.000221853 | 0.00472392  |
| 20663 | 10546434 | <a href="#">NM_175314</a>          | <a href="#">101401</a>    | a disintegrin-like and metallo | <a href="#">Adamts9</a>            | 0.558 | -4.875  | 0.00165802  | 0.0187471   |
| 20664 | 10400984 | <a href="#">NM_178715</a>          | <a href="#">238257</a>    | transmembrane protein 30B      | <a href="#">Tmem30b</a>            | 0.558 | -6.458  | 0.000306663 | 0.00580491  |
| 20665 | 10434745 |                                    |                           |                                |                                    | 0.557 | -7.821  | 8.99885e-05 | 0.00260646  |
| 20666 | 10483851 | <a href="#">NM_009989</a>          | <a href="#">13067</a>     | cytochrome c, testis           | <a href="#">Cyc1</a>               | 0.556 | -2.924  | 0.0214771   | 0.114762    |
| 20667 | 10500685 | <a href="#">NM_144900</a>          | <a href="#">11928</a>     | ATPase, Na+/K+ transporting, a | <a href="#">Atp1a1</a>             | 0.555 | -8.565  | 4.94509e-05 | 0.0017254   |
| 20668 | 10556769 | <a href="#">NM_016870</a>          | <a href="#">20216</a>     | acyl-CoA synthetase medium-cha | <a href="#">Acsm3</a>              | 0.555 | -5.985  | 0.000491147 | 0.00799473  |
| 20669 | 10503212 | <a href="#">NM_001081417</a>       | <a href="#">320790</a>    | chromodomain helicase DNA      | <a href="#">Chd7</a>               | 0.555 | -5.1    | 0.00127734  | 0.015736    |
| 20670 | 10453857 | <a href="#">NM_010258</a>          | <a href="#">14465</a>     | GATA binding protein 6         | <a href="#">Gata6</a>              | 0.555 | -4.164  | 0.00395449  | 0.0346513   |
| 20671 | 10402020 | <a href="#">NM_001081191</a>       | <a href="#">319670</a>    | echinoderm microtubule associa | <a href="#">Eml5</a>               | 0.555 | -5.233  | 0.00109994  | 0.0140187   |
| 20672 | 10548905 | <a href="#">NM_007945</a>          | <a href="#">13860</a>     | epidermal growth factor recept | <a href="#">Eps8</a>               | 0.554 | -7.57   | 0.000111237 | 0.00299999  |
| 20673 | 10359190 | <a href="#">BC023737</a>           | <a href="#">215015</a>    | RIKEN cDNA C530043G21 gene     | <a href="#">C530043G21Rik</a>      | 0.554 | -8.005  | 7.72676e-05 | 0.00232724  |
| 20674 | 10347734 | <a href="#">NM_001004173</a>       | <a href="#">433323</a>    | sphingosine-1-phosphate phosph | <a href="#">Sgpp2</a>              | 0.554 | -5.137  | 0.00122572  | 0.0152338   |
| 20675 | 10436608 | <a href="#">NM_009988</a>          | <a href="#">13052</a>     | coxsaackievirus and adenovirus | <a href="#">Cxadr</a>              | 0.554 | -6.199  | 0.000395678 | 0.00687445  |
| 20676 | 10598848 | <a href="#">NM_199317</a>          | <a href="#">382207</a>    | PHD finger protein 16          | <a href="#">Phf16</a>              | 0.553 | -8.99   | 3.58272e-05 | 0.00138235  |
| 20677 | 10577449 | <a href="#">NM_007511</a>          | <a href="#">11979</a>     | ATPase, Cu++ transporting, bet | <a href="#">Atp7b</a>              | 0.553 | -5.459  | 0.000856838 | 0.0117343   |
| 20678 | 10491106 | <a href="#">NM_008875</a>          | <a href="#">18805</a>     | phospholipase D1               | <a href="#">Pld1</a>               | 0.553 | -12.032 | 4.92977e-06 | 0.000373365 |
| 20679 | 10527965 | <a href="#">NM_022890</a>          | <a href="#">64945</a>     | claudin 12                     | <a href="#">Cldn12</a>             | 0.552 | -13.326 | 2.42674e-06 | 0.000239929 |
| 20680 | 10496302 | <a href="#">NM_027288</a>          | <a href="#">110173</a>    | mannosidase, beta A, lysosomal | <a href="#">Manba</a>              | 0.551 | -5.872  | 0.000552093 | 0.00866626  |
| 20681 | 10505008 | <a href="#">NM_001112412</a>       | <a href="#">75570</a>     | FGGY carbohydrate kinase       | <a href="#">Fggy</a>               | 0.551 | -2.744  | 0.0070410   | 0.127100    |

|       |          |                                    |                        |                                |                               |       |         |             |             |
|-------|----------|------------------------------------|------------------------|--------------------------------|-------------------------------|-------|---------|-------------|-------------|
| 20681 | 10505996 | <a href="#">NM_001115412</a>       | <a href="#">12276</a>  | domai                          | <a href="#">Fggy</a>          | 0.551 | -2.744  | 0.0279419   | 0.157109    |
| 20682 | 10428698 | <a href="#">NM_016667</a>          | <a href="#">20649</a>  | syntrophin, basic 1            | <a href="#">Sntb1</a>         | 0.551 | -8.087  | 7.22369e-05 | 0.00222002  |
| 20683 | 10506188 | <a href="#">NM_028132</a>          | <a href="#">72157</a>  | phosphoglucomutase 2           | <a href="#">Pgm2</a>          | 0.551 | -7.817  | 9.0226e-05  | 0.00260729  |
| 20684 | 10508883 | <a href="#">NM_001083916</a>       | <a href="#">69073</a>  | RIKEN cDNA 1810019J16 gene     | <a href="#">1810019J16Rik</a> | 0.551 | -7.561  | 0.000112156 | 0.00301032  |
| 20685 | 10424400 | <a href="#">NM_010849</a>          | <a href="#">17869</a>  | myelocytomatosis oncogene      | <a href="#">Myc</a>           | 0.55  | -5.649  | 0.000698238 | 0.0102382   |
| 20686 | 10519886 | <a href="#">NM_013657</a>          | <a href="#">20348</a>  | sema domain, immunoglobulin do | <a href="#">Sema3c</a>        | 0.55  | -3.152  | 0.0154809   | 0.0923988   |
| 20687 | 10392484 | <a href="#">NM_013851</a>          | <a href="#">27404</a>  | ATP-binding cassette, sub-fami | <a href="#">Abca8b</a>        | 0.548 | -4.95   | 0.00151839  | 0.0175724   |
| 20688 | 10438626 | <a href="#">NM_023794</a>          | <a href="#">104156</a> | ets variant gene 5             | <a href="#">Etv5</a>          | 0.548 | -3.816  | 0.00621754  | 0.0481199   |
| 20689 | 10587880 | <a href="#">NM_029620</a>          | <a href="#">76477</a>  | procollagen C-endopeptidase en | <a href="#">Pcolce2</a>       | 0.546 | -9.162  | 3.15479e-05 | 0.00127787  |
| 20690 | 10505788 | <a href="#">BC060063</a>           | <a href="#">230379</a> | N-acylsphingosine amidohydrola | <a href="#">Asah3l</a>        | 0.546 | -6.531  | 0.000285829 | 0.00553948  |
| 20691 | 10402394 | <a href="#">NM_009246</a>          | <a href="#">20703</a>  | serine (or cysteine) peptidase | <a href="#">Serpina1d</a>     | 0.544 | -6.627  | 0.000260755 | 0.00524089  |
| 20692 | 10503172 | <a href="#">NM_001081417</a>       | <a href="#">320790</a> | chromodomain helicase DNA bind | <a href="#">Chd7</a>          | 0.544 | -5.61   | 0.00072789  | 0.0105559   |
| 20693 | 10602009 | <a href="#">NM_023270</a>          | <a href="#">66889</a>  | ring finger protein 128        | <a href="#">Rnf128</a>        | 0.543 | -5.292  | 0.00103012  | 0.013395    |
| 20694 | 10399121 | <a href="#">NM_011215</a>          | <a href="#">19276</a>  | protein tyrosine phosphatase,  | <a href="#">Ptpn2</a>         | 0.543 | -10.911 | 9.6584e-06  | 0.000593655 |
| 20695 | 10435383 | <a href="#">NM_023587</a>          | <a href="#">70757</a>  | protein tyrosine phosphatase-1 | <a href="#">Ptplb</a>         | 0.541 | -6.99   | 0.000185902 | 0.00421753  |
| 20696 | 10389816 | <a href="#">NM_028011</a>          | <a href="#">71943</a>  | target of myb1-like 1 (chicken | <a href="#">Tom11</a>         | 0.541 | -11.22  | 7.9759e-06  | 0.000527007 |
| 20697 | 10353181 | <a href="#">NM_145381</a>          | <a href="#">212442</a> | lactamase, beta 2              | <a href="#">Lactb2</a>        | 0.541 | -7.318  | 0.000138452 | 0.00342078  |
| 20698 | 10416541 | <a href="#">NM_172813</a>          | <a href="#">239188</a> | ecto-NOX disulfide-thiol excha | <a href="#">Enox1</a>         | 0.54  | -10.994 | 9.16528e-06 | 0.000580212 |
| 20699 | 10530592 | <a href="#">NM_177136</a>          | <a href="#">72313</a>  | furry homolog-like (Drosophila | <a href="#">Fryl</a>          | 0.539 | -12.114 | 4.70332e-06 | 0.000367274 |
| 20700 | 10443408 | <a href="#">NM_011950</a>          | <a href="#">26415</a>  | mitogen-activated protein kina | <a href="#">Mapk13</a>        | 0.539 | -8.921  | 3.76999e-05 | 0.00142276  |
| 20701 | 10514466 | <a href="#">NM_010591</a>          | <a href="#">16476</a>  | Jun oncogene                   | <a href="#">Jun</a>           | 0.539 | -6.732  | 0.000236027 | 0.00493138  |
| 20702 | 10431872 | <a href="#">ENSMUST00000100262</a> | <a href="#">105727</a> | solute carrier family 38, memb | <a href="#">Slc38a1</a>       | 0.539 | -7.74   | 9.62565e-05 | 0.00272092  |
| 20703 | 10602805 | <a href="#">NM_001081124</a>       | <a href="#">78283</a>  | MAP7 domain containing 2       | <a href="#">Mtap7d2</a>       | 0.539 | -8.051  | 7.43807e-05 | 0.00226615  |
| 20704 | 10546853 | <a href="#">NM_080448</a>          | <a href="#">259302</a> | SLIT-ROBO Rho GTPase activatin | <a href="#">Srgap3</a>        | 0.539 | -8.412  | 5.57103e-05 | 0.00186897  |
| 20705 | 10392056 | <a href="#">NM_007805</a>          | <a href="#">13056</a>  | cytochrome b-561               | <a href="#">Cyb561</a>        | 0.539 | -6.918  | 0.000198526 | 0.00437711  |
| 20706 | 10525256 | <a href="#">NM_029912</a>          | <a href="#">77462</a>  | transmembrane protein 116      | <a href="#">Tmem116</a>       | 0.538 | -5.315  | 0.00100399  | 0.0131653   |
| 20707 | 10428089 | <a href="#">NM_145469</a>          | <a href="#">223473</a> | NIPA-like domain containing 2  | <a href="#">Npal2</a>         | 0.538 | -8.67   | 4.56041e-05 | 0.00163988  |
| 20708 | 10603000 | <a href="#">NM_198409</a>          | <a href="#">24004</a>  | retinoic acid induced 2        | <a href="#">Rai2</a>          | 0.537 | -4.432  | 0.00282436  | 0.0277115   |
| 20709 | 10394186 | <a href="#">NM_007886</a>          | <a href="#">13528</a>  | dystrobrevin, beta             | <a href="#">Dtnb</a>          | 0.537 | -14.635 | 1.26163e-06 | 0.000161613 |
| 20710 | 10435789 | <a href="#">ENSMUST00000033479</a> | <a href="#">56490</a>  | zinc finger and BTB domain con | <a href="#">Zbtb20</a>        | 0.537 | -8.59   | 4.84939e-05 | 0.00170608  |
| 20711 | 10529979 | <a href="#">NM_008904</a>          | <a href="#">19017</a>  | peroxisome proliferative activ | <a href="#">Ppargc1a</a>      | 0.536 | -6.477  | 0.000301031 | 0.00574459  |
| 20712 | 10398354 |                                    |                        |                                |                               | 0.536 | -5.801  | 0.000594382 | 0.00916676  |
| 20713 | 10506058 | <a href="#">NM_172696</a>          | <a href="#">12695</a>  | InaD-like (Drosophila)         | <a href="#">Inadl</a>         | 0.536 | -14.023 | 1.70052e-06 | 0.000189817 |
| 20714 | 10430956 | <a href="#">NM_029787</a>          | <a href="#">109754</a> | cytochrome b5 reductase 3      | <a href="#">Cyb5r3</a>        | 0.536 | -12.641 | 3.50249e-06 | 0.000297416 |
| 20715 | 10382341 | <a href="#">NM_009217</a>          | <a href="#">20606</a>  | somatostatin receptor 2        | <a href="#">Sstr2</a>         | 0.535 | -6.132  | 0.000423258 | 0.00721493  |
| 20716 | 10369040 | <a href="#">NM_011282</a>          | <a href="#">19886</a>  | Ros1 proto-oncogene            | <a href="#">Ros1</a>          | 0.535 | -10.043 | 1.69897e-05 | 0.000841289 |
| 20717 | 10355960 | <a href="#">NM_009129</a>          | <a href="#">20254</a>  | secretogranin II               | <a href="#">Scg2</a>          | 0.534 | -5.832  | 0.000575585 | 0.00895525  |
| 20718 | 10548207 | <a href="#">NM_007376</a>          | <a href="#">11287</a>  | pregnancy zone protein         | <a href="#">Pzp</a>           | 0.532 | -8.652  | 4.62474e-05 | 0.00165738  |
| 20719 | 10513162 | <a href="#">ENSMUST00000075637</a> | <a href="#">545622</a> | protein tyrosine phosphatase,  | <a href="#">Ptpn3</a>         | 0.531 | -4.535  | 0.00248852  | 0.0253525   |
| 20720 | 10440534 | <a href="#">NM_011782</a>          | <a href="#">23794</a>  | a disintegrin-like and metallo | <a href="#">Adamts5</a>       | 0.531 | -6.51   | 0.000291609 | 0.00563085  |
| 20721 | 10406646 | <a href="#">NM_028772</a>          | <a href="#">74129</a>  | dimethylglycine dehydrogenase  | <a href="#">Dmgdh</a>         | 0.53  | -6.49   | 0.000297369 | 0.00569526  |
| 20722 | 10513112 | <a href="#">NM_019427</a>          | <a href="#">54357</a>  | erythrocyte protein band 4.1-l | <a href="#">Epb4.144b</a>     | 0.53  | -8.93   | 3.74587e-05 | 0.00142276  |
| 20723 | 10549594 | <a href="#">NM_021324</a>          | <a href="#">57776</a>  | tweety homolog 1 (Drosophila)  | <a href="#">Ttyh1</a>         | 0.529 | -3.472  | 0.00989335  | 0.0675805   |
| 20724 | 10450731 | <a href="#">XR_034252</a>          | <a href="#">630294</a> | MHC class Ib T9                | <a href="#">H2-t9</a>         | 0.529 | -2.149  | 0.0676086   | 0.242908    |
| 20725 | 10582020 | <a href="#">NM_026572</a>          | <a href="#">68133</a>  | glycine cleavage system protei | <a href="#">Gcsh</a>          | 0.529 | -13.114 | 2.71317e-06 | 0.000250979 |
| 20726 | 10474814 | <a href="#">NM_170593</a>          | <a href="#">214240</a> | dispatched homolog 2 (Drosophi | <a href="#">Disp2</a>         | 0.529 | -13.203 | 2.58941e-06 | 0.000245496 |
| 20727 | 10569038 | <a href="#">BC049815</a>           | <a href="#">71345</a>  | transmembrane protein 16J      | <a href="#">Tmem16j</a>       | 0.528 | -6.015  | 0.000476328 | 0.00781341  |
| 20728 | 10483000 | <a href="#">NM_021359</a>          | <a href="#">16420</a>  | integrin beta 6                | <a href="#">Itgb6</a>         | 0.527 | -5.573  | 0.00075672  | 0.0108175   |

|       |          |                                     |                           |                                   |                                    |       |                  |             |             |
|-------|----------|-------------------------------------|---------------------------|-----------------------------------|------------------------------------|-------|------------------|-------------|-------------|
| 20729 | 10398319 | <a href="#">NM_010052</a>           | <a href="#">13386</a>     | delta-like 1 homolog (Drosophi    | <a href="#">Dlk1</a>               | 0.527 | -9.14            | 3.20692e-05 | 0.00128911  |
| 20730 | 10479221 | <a href="#">BC098094</a>            | <a href="#">433520</a>    | predicted gene,<br>OTTMUSG0000001 | <a href="#">OTTMUSG00000016571</a> | 0.526 | -5.962           | 0.000503152 | 0.00812731  |
| 20731 | 10549842 | <a href="#">NM_001024928</a>        | <a href="#">384763</a>    | zinc finger protein 667           | <a href="#">Zfp667</a>             | 0.526 | -8.403           | 5.61044e-05 | 0.00187109  |
| 20732 | 10556509 | <a href="#">NM_145584</a>           | <a href="#">233744</a>    | spondin 1, (f-spondin) extrace    | <a href="#">Spon1</a>              | 0.525 | -                | 2.71163e-06 | 0.000250979 |
| 20733 | 10601903 | <a href="#">NM_001035510</a>        | <a href="#">66995</a>     | zinc finger, CCHC domain conta    | <a href="#">Zcche18</a>            | 0.524 | 13.115<br>-4.956 | 0.00150822  | 0.0174739   |
| 20734 | 10435514 | <a href="#">NM_134109</a>           | <a href="#">106347</a>    | immunoglobulin-like domain<br>con | <a href="#">Ildr1</a>              | 0.521 | -5.947           | 0.000510803 | 0.008207    |
| 20735 | 10406205 | <a href="#">NM_030711</a>           | <a href="#">80898</a>     | endoplasmic reticulum aminopep    | <a href="#">Erap1</a>              | 0.519 | -10.347          | 1.38687e-05 | 0.000740626 |
| 20736 | 10587733 | <a href="#">NM_007801</a>           | <a href="#">13036</a>     | cathepsin H                       | <a href="#">Ctsh</a>               | 0.519 | -11.266          | 7.75294e-06 | 0.000517123 |
| 20737 | 10523758 | <a href="#">NM_001033550</a>        | <a href="#">433926</a>    | leucine rich repeat containing    | <a href="#">Lrrc8b</a>             | 0.519 | -6.687           | 0.00024637  | 0.00504284  |
| 20738 | 10385175 | <a href="#">NM_170779</a>           | <a href="#">211652</a>    | WW, C2 and coiled-coil domain     | <a href="#">Wwc1</a>               | 0.519 | -8.543           | 5.02826e-05 | 0.00174291  |
| 20739 | 10399505 | <a href="#">NM_015764</a>           | <a href="#">268527</a>    | gene regulated by estrogen in     | <a href="#">Greb1</a>              | 0.518 | -6.791           | 0.000223358 | 0.00474642  |
| 20740 | 10464471 | <a href="#">NM_010253</a>           | <a href="#">14419</a>     | galanin                           | <a href="#">Gal</a>                | 0.518 | -7.097           | 0.00016865  | 0.00394462  |
| 20741 | 10397507 | <a href="#">NM_010363</a>           | <a href="#">14874</a>     | glutathione transferase zeta 1    | <a href="#">Gstz1</a>              | 0.517 | -7.784           | 9.27977e-05 | 0.00266592  |
| 20742 | 10508907 |                                     |                           |                                   |                                    | 0.517 | -3.328           | 0.0120882   | 0.077195    |
| 20743 | 10419089 | <a href="#">NM_027717</a>           | <a href="#">71200</a>     | DPY30 domain containing 2         | <a href="#">Dydc2</a>              | 0.516 | -4.529           | 0.00250532  | 0.025443    |
| 20744 | 10554160 | <a href="#">ENSMUST00000098370</a>  | <a href="#">100038684</a> | predicted gene,<br>ENSMUSG0000007 | <a href="#">ENSMUSG00000074066</a> | 0.516 | -3.359           | 0.0115717   | 0.0750297   |
| 20745 | 10430319 | <a href="#">NM_009437</a>           | <a href="#">22117</a>     | thiosulfate sulfurtransferase,    | <a href="#">Tst</a>                | 0.515 | -12.617          | 3.54763e-06 | 0.000298849 |
| 20746 | 10445879 | <a href="#">NM_001031811</a>        | <a href="#">211468</a>    | potassium voltage-gated channe    | <a href="#">Kcnh8</a>              | 0.515 | -7.708           | 9.89087e-05 | 0.002759    |
| 20747 | 10375137 | <a href="#">NM_031169</a>           | <a href="#">16533</a>     | potassium large conductance ca    | <a href="#">Kcnmb1</a>             | 0.514 | -5.425           | 0.00088862  | 0.0120519   |
| 20748 | 10397882 | <a href="#">NM_007693</a>           | <a href="#">12652</a>     | chromogranin A                    | <a href="#">Chga</a>               | 0.512 | -12.23           | 4.40158e-06 | 0.000348901 |
| 20749 | 10541751 |                                     |                           |                                   |                                    | 0.512 | -2.883           | 0.022803    | 0.119758    |
| 20750 | 10594973 | <a href="#">NM_001081153</a>        | <a href="#">208898</a>    | unc-13 homolog C (C. elegans)     | <a href="#">Unc13c</a>             | 0.512 | -4.171           | 0.00391898  | 0.0344401   |
| 20751 | 10515613 | <a href="#">NM_011213</a>           | <a href="#">19268</a>     | protein tyrosine phosphatase,     | <a href="#">Ptpnf</a>              | 0.512 | -11.298          | 7.60403e-06 | 0.000510979 |
| 20752 | 10583320 | <a href="#">NM_133214</a>           | <a href="#">170748</a>    | cDNA sequence BC017612            | <a href="#">BC017612</a>           | 0.512 | -6.802           | 0.000221097 | 0.00471258  |
| 20753 | 10566926 | <a href="#">NM_025999</a>           | <a href="#">67150</a>     | ring finger protein 141           | <a href="#">Rnf141</a>             | 0.51  | -12.675          | 3.4366e-06  | 0.000296938 |
| 20754 | 10585982 |                                     |                           |                                   |                                    | 0.509 | -3.865           | 0.00582379  | 0.0460502   |
| 20755 | 10498981 | <a href="#">NM_181849</a>           | <a href="#">110135</a>    | fibrinogen, B beta polypeptide    | <a href="#">Fgb</a>                | 0.509 | -6.641           | 0.000257184 | 0.00517895  |
| 20756 | 10601312 | <a href="#">AK147435</a>            | <a href="#">331484</a>    | predicted gene,<br>ENSMUSG0000007 | <a href="#">ENSMUSG00000073019</a> | 0.509 | -6.259           | 0.000372769 | 0.00657916  |
| 20757 | 10476814 | <a href="#">NM_016889</a>           | <a href="#">53626</a>     | insulinoma-associated 1           | <a href="#">Insm1</a>              | 0.509 | -5.936           | 0.000516826 | 0.00827861  |
| 20758 | 10515003 | <a href="#">NM_001099303</a>        | <a href="#">545667</a>    | predicted gene,<br>OTTMUSG0000000 | <a href="#">OTTMUSG00000008243</a> | 0.508 | -9.093           | 3.31773e-05 | 0.00131861  |
| 20759 | 10537509 | <a href="#">ENSMUST000000071535</a> | <a href="#">232714</a>    | maltase-glucoamylase              | <a href="#">Mgam</a>               | 0.508 | -6.836           | 0.000214259 | 0.00464644  |
| 20760 | 10581518 | <a href="#">NM_025458</a>           | <a href="#">66269</a>     | transmembrane emp24 protein tr    | <a href="#">Tmed6</a>              | 0.507 | -9.642           | 2.23834e-05 | 0.00101169  |
| 20761 | 10490129 | <a href="#">NM_007557</a>           | <a href="#">12162</a>     | bone morphogenetic protein 7      | <a href="#">Bmp7</a>               | 0.507 | -6.973           | 0.000188808 | 0.00422741  |
| 20762 | 10439362 | <a href="#">NM_172440</a>           | <a href="#">207227</a>    | syntaxin binding protein 5-lik    | <a href="#">Stxbp5l</a>            | 0.507 | -4.14            | 0.00407379  | 0.035447    |
| 20763 | 10370552 | <a href="#">NM_015817</a>           | <a href="#">50784</a>     | phosphatidic acid phosphatase     | <a href="#">Ppap2c</a>             | 0.507 | -6.277           | 0.00036624  | 0.00649646  |
| 20764 | 10530612 | <a href="#">NM_028194</a>           | <a href="#">72313</a>     | furry homolog-like (Drosophila    | <a href="#">Fryl</a>               | 0.507 | -7.261           | 0.000145684 | 0.00353339  |
| 20765 | 10523595 | <a href="#">NM_011204</a>           | <a href="#">19249</a>     | protein tyrosine phosphatase,     | <a href="#">Ptpn13</a>             | 0.506 | -8.592           | 4.84155e-05 | 0.00170608  |
| 20766 | 10506269 | <a href="#">NM_009647</a>           | <a href="#">11639</a>     | adenylate kinase 3 alpha-like     | <a href="#">Ak3l1</a>              | 0.506 | -5.368           | 0.000946611 | 0.0126278   |
| 20767 | 10535174 | <a href="#">NM_144914</a>           | <a href="#">231832</a>    | transmembrane protein 184a        | <a href="#">Tmem184a</a>           | 0.505 | -6.134           | 0.000422093 | 0.00720964  |
| 20768 | 10592471 | <a href="#">NM_172768</a>           | <a href="#">235283</a>    | GRAM domain containing 1B         | <a href="#">Gramd1b</a>            | 0.504 | -13.194          | 2.6008e-06  | 0.000245496 |
| 20769 | 10423498 | <a href="#">NM_146057</a>           | <a href="#">223453</a>    | death-associated protein          | <a href="#">Dap</a>                | 0.503 | -10.158          | 1.57242e-05 | 0.000808937 |
| 20770 | 10488374 | <a href="#">NM_010446</a>           | <a href="#">15376</a>     | forkhead box A2                   | <a href="#">Foxa2</a>              | 0.503 | -10.724          | 1.08654e-05 | 0.000636968 |
| 20771 | 10514933 | <a href="#">NM_009949</a>           | <a href="#">12896</a>     | carnitine palmitoyltransferase    | <a href="#">Cpt2</a>               | 0.503 | -12.476          | 3.83662e-06 | 0.000319376 |
| 20772 | 10411126 | <a href="#">NM_021310</a>           | <a href="#">57748</a>     | junction-mediating and regulat    | <a href="#">Jmy</a>                | 0.501 | -10.27           | 1.45913e-05 | 0.000761775 |
| 20773 | 10467230 | <a href="#">NM_031156</a>           | <a href="#">15925</a>     | insulin degrading enzyme          | <a href="#">Ide</a>                | 0.501 | -14.743          | 1.1984e-06  | 0.000156235 |

|       |          |                                    |                        |                                |                               |       |         |             |             |
|-------|----------|------------------------------------|------------------------|--------------------------------|-------------------------------|-------|---------|-------------|-------------|
| 20774 | 10417807 | <a href="#">ENSMUST00000024155</a> | <a href="#">74571</a>  | potassium channel, subfamily K | <a href="#">Kcnk16</a>        | 0.5   | -6.822  | 0.000216971 | 0.00467702  |
| 20775 | 10445308 | <a href="#">NM_018887</a>          | <a href="#">56050</a>  | cytochrome P450, family 39, su | <a href="#">Cyp39a1</a>       | 0.5   | -7.675  | 0.000101752 | 0.00281072  |
| 20776 | 10534395 | <a href="#">NM_009903</a>          | <a href="#">12740</a>  | claudin 4                      | <a href="#">Cldn4</a>         | 0.499 | -7.689  | 0.000100565 | 0.00278682  |
| 20777 | 10411226 | <a href="#">NM_007974</a>          | <a href="#">14063</a>  | coagulation factor II (thrombi | <a href="#">F2r1</a>          | 0.498 | -8.071  | 7.32222e-05 | 0.00224704  |
| 20778 | 10526853 | <a href="#">NM_030565</a>          | <a href="#">80752</a>  | cDNA sequence BC004044         | <a href="#">BC004044</a>      | 0.498 | -12.644 | 3.49666e-06 | 0.000297416 |
| 20779 | 10384378 | <a href="#">NM_016672</a>          | <a href="#">13195</a>  | dopa decarboxylase             | <a href="#">Ddc</a>           | 0.497 | -9.915  | 1.85228e-05 | 0.00089827  |
| 20780 | 10546430 | <a href="#">NM_175314</a>          | <a href="#">101401</a> | a disintegrin-like and metallo | <a href="#">Adamts9</a>       | 0.496 | -5.551  | 0.000775    | 0.011002    |
| 20781 | 10496015 | <a href="#">NM_183423</a>          | <a href="#">66350</a>  | phospholipase A2, group XIA    | <a href="#">Pla2g12a</a>      | 0.495 | -8.041  | 7.50367e-05 | 0.00227956  |
| 20782 | 10484227 | <a href="#">NM_175465</a>          | <a href="#">228071</a> | SEC14 and spectrin domains 1   | <a href="#">Sestd1</a>        | 0.495 | -6.119  | 0.000428556 | 0.00727109  |
| 20783 | 10604226 | <a href="#">NM_021550</a>          | <a href="#">59048</a>  | C1GALT1-specific chaperone 1   | <a href="#">C1galt1c1</a>     | 0.494 | -10.047 | 1.69451e-05 | 0.000841289 |
| 20784 | 10583825 | <a href="#">NM_172763</a>          | <a href="#">235047</a> | zinc finger protein 809        | <a href="#">Zfp809</a>        | 0.492 | -7.65   | 0.000103885 | 0.00284897  |
| 20785 | 10368343 | <a href="#">NM_007482</a>          | <a href="#">11846</a>  | arginase 1, liver              | <a href="#">Arg1</a>          | 0.491 | -10.575 | 1.19576e-05 | 0.000679657 |
| 20786 | 10408268 | <a href="#">NM_145399</a>          | <a href="#">214189</a> | secretagoin, EF-hand calcium   | <a href="#">Scgn</a>          | 0.49  | -3.658  | 0.00767724  | 0.0564029   |
| 20787 | 10607089 | <a href="#">NM_207625</a>          | <a href="#">50790</a>  | acyl-CoA synthetase long-chain | <a href="#">Acsl4</a>         | 0.489 | -6.974  | 0.000188644 | 0.00422741  |
| 20788 | 10362499 | <a href="#">NM_010237</a>          | <a href="#">14302</a>  | fyn-related kinase             | <a href="#">Frk</a>           | 0.485 | -7.929  | 8.22263e-05 | 0.0024316   |
| 20789 | 10599627 | <a href="#">NM_013556</a>          | <a href="#">15452</a>  | hypoxanthine guanine phosphori | <a href="#">Hprt1</a>         | 0.485 | -8.432  | 5.48473e-05 | 0.00186146  |
| 20790 | 10370766 | <a href="#">NM_010255</a>          | <a href="#">14431</a>  | guanidinoacetate methyltransfe | <a href="#">Gamt</a>          | 0.484 | -13.349 | 2.39805e-06 | 0.000239929 |
| 20791 | 10600814 | <a href="#">NM_008179</a>          | <a href="#">14853</a>  | G1 to S phase transition 2     | <a href="#">Gspt2</a>         | 0.484 | -7.346  | 0.000135111 | 0.00336488  |
| 20792 | 10467578 | <a href="#">NM_031376</a>          | <a href="#">83490</a>  | phosphoinositide-3-kinase adap | <a href="#">Pik3ap1</a>       | 0.483 | -7.776  | 9.33772e-05 | 0.00267301  |
| 20793 | 10399360 | <a href="#">NM_007483</a>          | <a href="#">11852</a>  | ras homolog gene family, membe | <a href="#">Rheb</a>          | 0.483 | -6.208  | 0.000392086 | 0.00682585  |
| 20794 | 10393379 | <a href="#">NM_026280</a>          | <a href="#">67622</a>  | matrix-remodelling associated  | <a href="#">Mxra7</a>         | 0.483 | -       | 2.13416e-06 | 0.000221199 |
| 20795 | 10491846 |                                    |                        |                                |                               | 0.481 | -13.574 | 0.00600004  | 0.0469175   |
| 20796 | 10523111 | <a href="#">ENSMUST00000094615</a> | <a href="#">622307</a> | similar to LOC360919 protein   | <a href="#">LOC622307</a>     | 0.481 | -3.843  | 7.76866e-05 | 0.00233325  |
| 20797 | 10363132 | <a href="#">NM_025684</a>          | <a href="#">66650</a>  | nephrocan                      | <a href="#">Nepn</a>          | 0.48  | -3.408  | 0.0108198   | 0.071604    |
| 20798 | 10378240 | <a href="#">NM_008771</a>          | <a href="#">18436</a>  | purinergic receptor P2X, ligan | <a href="#">P2rx1</a>         | 0.479 | -13.278 | 2.48815e-06 | 0.000241328 |
| 20799 | 10568332 | <a href="#">NM_133351</a>          | <a href="#">76560</a>  | protease, serine, 8 (prostasin | <a href="#">Prss8</a>         | 0.479 | -4.922  | 0.0015689   | 0.0180189   |
| 20800 | 10397189 | <a href="#">NM_029880</a>          | <a href="#">77219</a>  | zinc binding alcohol dehydroge | <a href="#">Zadh1</a>         | 0.479 | -9.846  | 1.94317e-05 | 0.00093035  |
| 20801 | 10484894 | <a href="#">NM_008982</a>          | <a href="#">19271</a>  | protein tyrosine phosphatase,  | <a href="#">Ptpnj</a>         | 0.478 | -14.925 | 1.09953e-06 | 0.00015001  |
| 20802 | 10595452 | <a href="#">NM_027394</a>          | <a href="#">70348</a>  | ubiquitin-conjugating enzyme E | <a href="#">Ube2cbp</a>       | 0.478 | -8.92   | 3.77492e-05 | 0.00142276  |
| 20803 | 10569646 | <a href="#">NM_007631</a>          | <a href="#">12443</a>  | cyclin D1                      | <a href="#">Cnd1</a>          | 0.478 | -10.804 | 1.03281e-05 | 0.000623688 |
| 20804 | 10462887 | <a href="#">NM_033614</a>          | <a href="#">110855</a> | phosphodiesterase 6C, cGMP spe | <a href="#">Pde6c</a>         | 0.478 | -8.599  | 4.81477e-05 | 0.00170608  |
| 20805 | 10607619 | <a href="#">NM_001024624</a>       | <a href="#">382253</a> | cyclin-dependent kinase-like 5 | <a href="#">Cdk15</a>         | 0.477 | -9.338  | 2.77696e-05 | 0.00118247  |
| 20806 | 10581455 | <a href="#">NM_176838</a>          | <a href="#">77411</a>  | RNA binding motif protein 35b  | <a href="#">Rbm35b</a>        | 0.477 | -11.528 | 6.62141e-06 | 0.000464589 |
| 20807 | 10513061 | <a href="#">NM_018761</a>          | <a href="#">54366</a>  | catenin (cadherin associated p | <a href="#">Cttnn1</a>        | 0.477 | -13.745 | 1.95588e-06 | 0.000208864 |
| 20808 | 10416887 | <a href="#">NM_198014</a>          | <a href="#">105439</a> | SLAIN motif family, member 1   | <a href="#">Slain1</a>        | 0.476 | -10.746 | 1.07172e-05 | 0.000636968 |
| 20809 | 10485979 | <a href="#">NM_010290</a>          | <a href="#">14617</a>  | gap junction protein, delta 2  | <a href="#">Gjd2</a>          | 0.476 | -3.902  | 0.00554779  | 0.0445509   |
| 20810 | 10461093 | <a href="#">NM_139269</a>          | <a href="#">225845</a> | HRAS like suppressor 3         | <a href="#">Hrasls3</a>       | 0.476 | -10.054 | 1.68634e-05 | 0.000840941 |
| 20811 | 10411395 | <a href="#">NM_012026</a>          | <a href="#">110596</a> | Rho-guanine nucleotide exchang | <a href="#">Rgnef</a>         | 0.475 | -10.943 | 9.46563e-06 | 0.000588651 |
| 20812 | 10513141 | <a href="#">ENSMUST00000075637</a> | <a href="#">545622</a> | protein tyrosine phosphatase,  | <a href="#">Ptpn3</a>         | 0.475 | -7.468  | 0.000121475 | 0.00314805  |
| 20813 | 10506820 |                                    |                        |                                |                               | 0.475 | -3.409  | 0.0107973   | 0.0715825   |
| 20814 | 10399680 | <a href="#">NM_138686</a>          | <a href="#">12879</a>  | cystin 1                       | <a href="#">Cys1</a>          | 0.474 | -9.652  | 2.22166e-05 | 0.00101021  |
| 20815 | 10569830 | <a href="#">BC048787</a>           | <a href="#">69697</a>  | RIKEN cDNA 2310057J16 gene     | <a href="#">2310057J16Rik</a> | 0.474 | -11.194 | 8.10039e-06 | 0.000528933 |
| 20816 | 10344679 | <a href="#">NM_173868</a>          | <a href="#">240690</a> | suppression of tumorigenicity  | <a href="#">St18</a>          | 0.472 | -7.725  | 9.7489e-05  | 0.00273746  |
| 20817 | 10406270 | <a href="#">NM_053108</a>          | <a href="#">93692</a>  | glutaredoxin                   | <a href="#">Glx</a>           | 0.47  | -12.932 | 2.99061e-06 | 0.000268322 |

|       |          |                                    |                        |                                |                               |       |         |             |             |
|-------|----------|------------------------------------|------------------------|--------------------------------|-------------------------------|-------|---------|-------------|-------------|
| 20818 | 10369567 | <a href="#">NM_145419</a>          | <a href="#">216019</a> | hexokinase domain containing 1 | <a href="#">Hkdc1</a>         | 0.47  | -10.366 | 1.36961e-05 | 0.000738749 |
| 20819 | 10396656 | <a href="#">AK133227</a>           | <a href="#">210762</a> | gene model 70, (NCBI)          | <a href="#">Gm70</a>          | 0.469 | -6.726  | 0.000237297 | 0.00494326  |
| 20820 | 10573979 | <a href="#">NM_010308</a>          | <a href="#">14681</a>  | guanine nucleotide binding pro | <a href="#">Gnao1</a>         | 0.468 | -6.564  | 0.000276843 | 0.00540322  |
| 20821 | 10496001 | <a href="#">NM_007686</a>          | <a href="#">12630</a>  | complement component factor i  | <a href="#">Cfi</a>           | 0.468 | -6.431  | 0.00031476  | 0.00587404  |
| 20822 | 10355836 | <a href="#">NM_009049</a>          | <a href="#">19711</a>  | regulated endocrine-specific p | <a href="#">Resp18</a>        | 0.468 | -12.919 | 3.01173e-06 | 0.000268322 |
| 20823 | 10505299 | <a href="#">NM_138653</a>          | <a href="#">192120</a> | B-box and SPRY domain containi | <a href="#">Bspry</a>         | 0.466 | -14.469 | 1.3665e-06  | 0.000167985 |
| 20824 | 10563487 | <a href="#">NM_011510</a>          | <a href="#">20927</a>  | ATP-binding cassette, sub-fami | <a href="#">Abcc8</a>         | 0.466 | -13.707 | 1.99373e-06 | 0.000210945 |
| 20825 | 10586781 | <a href="#">NM_181072</a>          | <a href="#">71602</a>  | myosin IE                      | <a href="#">Myo1e</a>         | 0.466 | -8.913  | 3.79427e-05 | 0.00142498  |
| 20826 | 10519770 | <a href="#">NM_011995</a>          | <a href="#">26875</a>  | piccolo (presynaptic cytomatri | <a href="#">Pclo</a>          | 0.465 | -12.752 | 3.29504e-06 | 0.000287894 |
| 20827 | 10567355 | <a href="#">NM_022420</a>          | <a href="#">64297</a>  | G protein-coupled receptor, fa | <a href="#">Gprc5b</a>        | 0.464 | -10.057 | 1.68293e-05 | 0.000840941 |
| 20828 | 10507551 | <a href="#">BC022764</a>           | <a href="#">66451</a>  | RIKEN cDNA 2610528J11 gene     | <a href="#">2610528J11Rik</a> | 0.464 | -6.552  | 0.000279967 | 0.00545084  |
| 20829 | 10602428 | <a href="#">ENSMUST00000096285</a> | <a href="#">279561</a> | WNK lysine deficient protein k | <a href="#">Wnk3</a>          | 0.464 | -15.383 | 8.89508e-07 | 0.000129709 |
| 20830 | 10369171 | <a href="#">AK156585</a>           | <a href="#">320305</a> | RIKEN cDNA 9530009G21 gene     | <a href="#">9530009G21Rik</a> | 0.462 | -7.374  | 0.000131796 | 0.003318    |
| 20831 | 10513641 | <a href="#">NM_010616</a>          | <a href="#">16552</a>  | kinesin family member 12       | <a href="#">Kif12</a>         | 0.462 | -11.089 | 8.64363e-06 | 0.000558902 |
| 20832 | 10435075 | <a href="#">NM_011638</a>          | <a href="#">22042</a>  | transferrin receptor           | <a href="#">Tfrc</a>          | 0.459 | -9.017  | 3.51171e-05 | 0.0013674   |
| 20833 | 10359571 | <a href="#">NM_010231</a>          | <a href="#">14261</a>  | flavin containing monooxygenas | <a href="#">Fmo1</a>          | 0.458 | -3.408  | 0.0108098   | 0.0715825   |
| 20834 | 10513922 | <a href="#">NM_001017427</a>       | <a href="#">242505</a> | RAS and EF hand domain contain | <a href="#">Rasef</a>         | 0.458 | -13.419 | 2.31203e-06 | 0.000232789 |
| 20835 | 10523772 | <a href="#">NM_178701</a>          | <a href="#">231549</a> | leucine rich repeat containing | <a href="#">Lrrc8d</a>        | 0.457 | -11.296 | 7.61249e-06 | 0.000510979 |
| 20836 | 10498710 | <a href="#">NM_009738</a>          | <a href="#">12038</a>  | butyrylcholinesterase          | <a href="#">Bche</a>          | 0.457 | -8.387  | 5.68349e-05 | 0.00188652  |
| 20837 | 10597935 | <a href="#">NM_133974</a>          | <a href="#">109332</a> | CUB domain containing protein  | <a href="#">Cdcpl</a>         | 0.456 | -6.007  | 0.000480534 | 0.00785801  |
| 20838 | 10606868 | <a href="#">NM_009052</a>          | <a href="#">19716</a>  | brain expressed gene 1         | <a href="#">Bex1</a>          | 0.455 | -7.556  | 0.000112575 | 0.00301032  |
| 20839 | 10366153 | <a href="#">NM_146240</a>          | <a href="#">237504</a> | Ras association (RalGDS/AF-6)  | <a href="#">Rassf9</a>        | 0.455 | -10.46  | 1.2881e-05  | 0.000712974 |
| 20840 | 10559816 |                                    |                        |                                |                               | 0.454 | -5.848  | 0.000565861 | 0.00885608  |
| 20841 | 10493516 |                                    |                        |                                |                               | 0.454 | -5.451  | 0.000863898 | 0.0118152   |
| 20842 | 10500021 | <a href="#">BC108378</a>           | <a href="#">70737</a>  | cingulin                       | <a href="#">Cgn</a>           | 0.453 | -7.026  | 0.000179887 | 0.00412082  |
| 20843 | 10402604 |                                    |                        |                                |                               | 0.453 | -6.309  | 0.000354749 | 0.00634586  |
| 20844 | 10398408 |                                    |                        |                                |                               | 0.452 | -3.572  | 0.00863051  | 0.0610776   |
| 20845 | 10398388 |                                    |                        |                                |                               | 0.452 | -2.619  | 0.0335882   | 0.154552    |
| 20846 | 10506108 |                                    |                        |                                |                               | 0.45  | -3.142  | 0.0157127   | 0.093166    |
| 20847 | 10585048 | <a href="#">NM_207675</a>          | <a href="#">54725</a>  | cell adhesion molecule 1       | <a href="#">Cadm1</a>         | 0.45  | -11.562 | 6.48857e-06 | 0.000458844 |
| 20848 | 10406229 | <a href="#">NM_013628</a>          | <a href="#">18548</a>  | proprotein convertase subtilis | <a href="#">Pcsk1</a>         | 0.449 | -6.082  | 0.000444954 | 0.00746676  |
| 20849 | 10408280 | <a href="#">NM_026825</a>          | <a href="#">68732</a>  | leucine rich repeat containing | <a href="#">Lrrc16a</a>       | 0.448 | -14.188 | 1.56763e-06 | 0.000184145 |
| 20850 | 10457357 | <a href="#">ENSMUST00000097679</a> | <a href="#">75739</a>  | membrane protein, palmitoylate | <a href="#">Mpp7</a>          | 0.447 | -4.48   | 0.00266263  | 0.0265936   |
| 20851 | 10568436 | <a href="#">NM_010207</a>          | <a href="#">14183</a>  | fibroblast growth factor recep | <a href="#">Fgfr2</a>         | 0.447 | -5.601  | 0.000734643 | 0.0106174   |
| 20852 | 10517609 | <a href="#">NM_028176</a>          | <a href="#">72269</a>  | cytidine deaminase             | <a href="#">Cda</a>           | 0.447 | -5.931  | 0.000519303 | 0.00829872  |
| 20853 | 10400926 | <a href="#">NM_153457</a>          | <a href="#">104001</a> | reticulon 1                    | <a href="#">Rtn1</a>          | 0.445 | -9.255  | 2.94923e-05 | 0.00121557  |
| 20854 | 10445338 | <a href="#">NM_032003</a>          | <a href="#">83965</a>  | ectonucleotide pyrophosphatase | <a href="#">Enpp5</a>         | 0.444 | -9.016  | 3.51323e-05 | 0.0013674   |
| 20855 | 10554814 |                                    |                        |                                |                               | 0.441 | -6.053  | 0.000458273 | 0.00760508  |
| 20856 | 10411527 | <a href="#">NM_013732</a>          | <a href="#">27220</a>  | CART prepropeptide             | <a href="#">Cartpt</a>        | 0.44  | -9.991  | 1.75941e-05 | 0.000863256 |
| 20857 | 10480570 | <a href="#">NM_178408</a>          | <a href="#">215705</a> | arrestin domain containing 1   | <a href="#">Arrdc1</a>        | 0.44  | -13.298 | 2.46238e-06 | 0.000239929 |
| 20858 | 10397633 | <a href="#">NM_201518</a>          | <a href="#">399558</a> | fibronectin leucine rich trans | <a href="#">Flrt2</a>         | 0.439 | -8.869  | 3.92002e-05 | 0.0014663   |
| 20859 | 10380581 | <a href="#">NM_008119</a>          | <a href="#">14607</a>  | gastric inhibitory polypeptide | <a href="#">Gip</a>           | 0.439 | -5.849  | 0.00056529  | 0.0088537   |
| 20860 | 10389719 | <a href="#">NM_029023</a>          | <a href="#">74617</a>  | serine carboxypeptidase 1      | <a href="#">Scpep1</a>        | 0.438 | -14.291 | 1.49019e-06 | 0.000178014 |
| 20861 | 10369154 | <a href="#">NM_008548</a>          | <a href="#">17155</a>  | mannosidase 1, alpha           | <a href="#">Man1a</a>         | 0.438 | -11.973 | 5.09907e-06 | 0.000382321 |

|       |          |                                    |                           |                                |                                    |       |         |             |             |
|-------|----------|------------------------------------|---------------------------|--------------------------------|------------------------------------|-------|---------|-------------|-------------|
| 20862 | 10596148 | <a href="#">NM_133977</a>          | <a href="#">22041</a>     | transferrin                    | <a href="#">Trf</a>                | 0.438 | -7.472  | 0.000121068 | 0.00314805  |
| 20863 | 10523021 | <a href="#">NM_018760</a>          | <a href="#">54403</a>     | solute carrier family 4 (anion | <a href="#">Slc4a4</a>             | 0.437 | -7.657  | 0.000103304 | 0.00283671  |
| 20864 | 10601161 | <a href="#">NM_008124</a>          | <a href="#">14618</a>     | gap junction protein, beta 1   | <a href="#">Gjb1</a>               | 0.436 | -13.245 | 2.53264e-06 | 0.000243904 |
| 20865 | 10602692 | <a href="#">NM_001004154</a>       | <a href="#">245670</a>    | Ras-related GTP binding B      | <a href="#">Rragb</a>              | 0.436 | -15.315 | 9.17742e-07 | 0.000132005 |
| 20866 | 10466886 |                                    |                           |                                |                                    | 0.436 | -7.962  | 8.00205e-05 | 0.00237968  |
| 20867 | 10388310 | <a href="#">NM_001015046</a>       | <a href="#">380711</a>    | GTPase activating RANGAP domai | <a href="#">Garn14</a>             | 0.435 | -7.817  | 9.02636e-05 | 0.00260729  |
| 20868 | 10417628 | <a href="#">NM_012061</a>          | <a href="#">27062</a>     | Ca2+-dependent secretion activ | <a href="#">Cadps</a>              | 0.435 | -12.242 | 4.3732e-06  | 0.000348901 |
| 20869 | 10602865 | <a href="#">ENSMUST00000033665</a> | <a href="#">270672</a>    | mitogen-activated protein kina | <a href="#">Map3k15</a>            | 0.435 | -12.272 | 4.29968e-06 | 0.000346994 |
| 20870 | 10539200 | <a href="#">NM_009042</a>          | <a href="#">19692</a>     | regenerating islet-derived 1   | <a href="#">Reg1</a>               | 0.435 | -9.523  | 2.43384e-05 | 0.00106766  |
| 20871 | 10433887 | <a href="#">NM_026163</a>          | <a href="#">67451</a>     | plakophilin 2                  | <a href="#">Pkp2</a>               | 0.434 | -9.275  | 2.90533e-05 | 0.00120452  |
| 20872 | 10565156 | <a href="#">NM_011983</a>          | <a href="#">26557</a>     | homer homolog 2 (Drosophila)   | <a href="#">Homer2</a>             | 0.432 | -8.265  | 6.25998e-05 | 0.00203008  |
| 20873 | 10607877 | <a href="#">NM_026662</a>          | <a href="#">110639</a>    | phosphoribosyl pyrophosphate s | <a href="#">Prps2</a>              | 0.432 | -18.663 | 2.2757e-07  | 5.86798e-05 |
| 20874 | 10415980 | <a href="#">NM_015795</a>          | <a href="#">50759</a>     | F-box protein 16               | <a href="#">Fbxo16</a>             | 0.431 | -11.826 | 5.55169e-06 | 0.000410437 |
| 20875 | 10462822 | <a href="#">NM_175353</a>          | <a href="#">107371</a>    | exocyst complex component 6    | <a href="#">Exoc6</a>              | 0.429 | -9.194  | 3.08275e-05 | 0.00126067  |
| 20876 | 10584827 | <a href="#">NM_007962</a>          | <a href="#">14012</a>     | myelin protein zero-like 2     | <a href="#">Mpz12</a>              | 0.429 | -10.169 | 1.56049e-05 | 0.000804756 |
| 20877 | 10352448 | <a href="#">NM_022019</a>          | <a href="#">63953</a>     | dual specificity phosphatase 1 | <a href="#">Dusp10</a>             | 0.428 | -12.264 | 4.31926e-06 | 0.000347249 |
| 20878 | 10406982 | <a href="#">NM_001081020</a>       | <a href="#">108154</a>    | a disintegrin-like and metallo | <a href="#">Adamts6</a>            | 0.427 | -6.31   | 0.000354297 | 0.00634586  |
| 20879 | 10607156 | <a href="#">NM_001110222</a>       | <a href="#">13193</a>     | doublecortin                   | <a href="#">Dcx</a>                | 0.427 | -8.634  | 4.68831e-05 | 0.00167166  |
| 20880 | 10543319 | <a href="#">NM_138587</a>          | <a href="#">27999</a>     | DNA segment, Chr 6, Wayne Stat | <a href="#">D6Wsu176e</a>          | 0.427 | -16.582 | 5.24686e-07 | 9.57331e-05 |
| 20881 | 10485445 | <a href="#">NM_007914</a>          | <a href="#">13661</a>     | ets homologous factor          | <a href="#">Ehf</a>                | 0.427 | -9.331  | 2.79111e-05 | 0.00118321  |
| 20882 | 10485388 | <a href="#">NM_178886</a>          | <a href="#">241576</a>    | low density lipoprotein recept | <a href="#">Ldlrad3</a>            | 0.426 | -21.697 | 7.81034e-08 | 3.30284e-05 |
| 20883 | 10574259 | <a href="#">NM_018882</a>          | <a href="#">14766</a>     | G protein-coupled receptor 56  | <a href="#">Gpr56</a>              | 0.426 | -11.332 | 7.44913e-06 | 0.000508433 |
| 20884 | 10380599 | <a href="#">NM_172799</a>          | <a href="#">237930</a>    | tubulin tyrosine ligase-like f | <a href="#">Ttl6</a>               | 0.426 | -3.237  | 0.0137368   | 0.0848032   |
| 20885 | 10428081 | <a href="#">NM_008287</a>          | <a href="#">15473</a>     | heat-responsive protein 12     | <a href="#">Hrsp12</a>             | 0.423 | -11.966 | 5.11891e-06 | 0.000382453 |
| 20886 | 10591522 | <a href="#">NM_001110300</a>       | <a href="#">11768</a>     | adaptor protein complex AP-1,  | <a href="#">Ap1m2</a>              | 0.421 | -14.576 | 1.29817e-06 | 0.000162417 |
| 20887 | 10597470 | <a href="#">NM_027294</a>          | <a href="#">70031</a>     | CKLF-like MARVEL transmembrane | <a href="#">Cmtm8</a>              | 0.421 | -13.116 | 2.71056e-06 | 0.000250979 |
| 20888 | 10491486 | <a href="#">NM_029570</a>          | <a href="#">76295</a>     | ATPase, class VI, type 11B     | <a href="#">Atp11b</a>             | 0.42  | -11.724 | 5.89348e-06 | 0.000425296 |
| 20889 | 10356154 | <a href="#">NM_172430</a>          | <a href="#">77629</a>     | SPHK1 interactor, AKAP domain  | <a href="#">Sphkap</a>             | 0.42  | -8.453  | 5.39577e-05 | 0.00184311  |
| 20890 | 10538753 |                                    |                           |                                |                                    | 0.419 | -9.53   | 2.42109e-05 | 0.00106427  |
| 20891 | 10554249 | <a href="#">NM_007424</a>          | <a href="#">11595</a>     | aggrecan                       | <a href="#">Acan</a>               | 0.418 | -13.451 | 2.2738e-06  | 0.000230034 |
| 20892 | 10606083 | <a href="#">NM_007709</a>          | <a href="#">12705</a>     | Cbp/p300-interacting transacti | <a href="#">Cited1</a>             | 0.418 | -9.033  | 3.46816e-05 | 0.00135547  |
| 20893 | 10464045 | <a href="#">NM_027976</a>          | <a href="#">433256</a>    | acyl-CoA synthetase long-chain | <a href="#">Acs15</a>              | 0.416 | -15.399 | 8.82916e-07 | 0.000129704 |
| 20894 | 10571599 |                                    |                           |                                |                                    | 0.416 | -8.116  | 7.05776e-05 | 0.00218491  |
| 20895 | 10421950 | <a href="#">NM_007826</a>          | <a href="#">13134</a>     | dachshund 1 (Drosophila)       | <a href="#">Dach1</a>              | 0.415 | -6.574  | 0.000274319 | 0.00538052  |
| 20896 | 10355225 | <a href="#">ENSMUST00000097706</a> | <a href="#">100038569</a> | predicted gene, ENSMUSG0000007 | <a href="#">ENSMUSG00000073656</a> | 0.414 | -4.287  | 0.00338205  | 0.0310771   |
| 20897 | 10414192 | <a href="#">NM_133653</a>          | <a href="#">11720</a>     | methionine adenosyltransferase | <a href="#">Mat1a</a>              | 0.413 | -14.094 | 1.64172e-06 | 0.000187819 |
| 20898 | 10456254 | <a href="#">NM_001114386</a>       | <a href="#">83814</a>     | neural precursor cell expresse | <a href="#">Nedd41</a>             | 0.41  | -16.579 | 5.2521e-07  | 9.57331e-05 |
| 20899 | 10562223 | <a href="#">NM_008557</a>          | <a href="#">17178</a>     | FXYD domain-containing ion tra | <a href="#">Fxyd3</a>              | 0.409 | -14.984 | 1.0695e-06  | 0.000149759 |
| 20900 | 10528015 | <a href="#">NM_027399</a>          | <a href="#">70358</a>     | six transmembrane epithelial a | <a href="#">Steap1</a>             | 0.407 | -7.625  | 0.000106103 | 0.00289852  |

|       |          |                                    |                        |                                |                               |       |         |             |             |
|-------|----------|------------------------------------|------------------------|--------------------------------|-------------------------------|-------|---------|-------------|-------------|
| 20901 | 10354506 | <a href="#">NM_133829</a>          | <a href="#">98682</a>  | RIKEN cDNA 2210010L05 gene     | <a href="#">2210010L05Rik</a> | 0.407 | -9.993  | 1.75696e-05 | 0.000863256 |
| 20902 | 10576581 | <a href="#">NM_008430</a>          | <a href="#">16525</a>  | potassium channel, subfamily K | <a href="#">Kcnk1</a>         | 0.405 | -9.042  | 3.44657e-05 | 0.00135203  |
| 20903 | 10546450 | <a href="#">NM_175314</a>          | <a href="#">101401</a> | a disintegrin-like and metallo | <a href="#">Adams9</a>        | 0.405 | -5.875  | 0.000550114 | 0.00864162  |
| 20904 | 10502279 | <a href="#">BC049886</a>           | <a href="#">77669</a>  | RIKEN cDNA 9130221D24 gene     | <a href="#">9130221D24Rik</a> | 0.403 | -10.069 | 1.66882e-05 | 0.00083847  |
| 20905 | 10401109 | <a href="#">NM_030677</a>          | <a href="#">14776</a>  | glutathione peroxidase 2       | <a href="#">Gpx2</a>          | 0.402 | -6.809  | 0.000219541 | 0.00469892  |
| 20906 | 10522127 | <a href="#">NM_031180</a>          | <a href="#">83379</a>  | klotho beta                    | <a href="#">Klb</a>           | 0.4   | -10.8   | 1.03528e-05 | 0.000623688 |
| 20907 | 10569129 | <a href="#">NM_011328</a>          | <a href="#">20287</a>  | secretin                       | <a href="#">Sct</a>           | 0.4   | -10.704 | 1.10052e-05 | 0.000641032 |
| 20908 | 10495596 | <a href="#">NM_001113478</a>       | <a href="#">20321</a>  | ferric-chelate reductase 1     | <a href="#">Frrs1</a>         | 0.399 | -10.403 | 1.33678e-05 | 0.000726604 |
| 20909 | 10595768 | <a href="#">NM_001033210</a>       | <a href="#">102502</a> | expressed sequence AI427122    | <a href="#">AI427122</a>      | 0.399 | -8.447  | 5.4203e-05  | 0.0018485   |
| 20910 | 10392522 | <a href="#">NM_153145</a>          | <a href="#">217258</a> | ATP-binding cassette, sub-fami | <a href="#">Abca8a</a>        | 0.398 | -6.263  | 0.00037139  | 0.00656579  |
| 20911 | 10571567 | <a href="#">NM_172752</a>          | <a href="#">234214</a> | sorbin and SH3 domain containi | <a href="#">Sorbs2</a>        | 0.397 | -7.719  | 9.80236e-05 | 0.00274155  |
| 20912 | 10421970 |                                    |                        |                                |                               | 0.396 | -5.518  | 0.000803673 | 0.0112535   |
| 20913 | 10510574 | <a href="#">NM_133753</a>          | <a href="#">74155</a>  | ERBB receptor feedback inhibit | <a href="#">Errfi1</a>        | 0.396 | -18.009 | 2.92923e-07 | 6.61923e-05 |
| 20914 | 10404053 | <a href="#">NM_023422</a>          | <a href="#">68024</a>  | histone cluster 1, H2bc        | <a href="#">Hist1h2bc</a>     | 0.395 | -9.163  | 3.15324e-05 | 0.00127787  |
| 20915 | 10559790 | <a href="#">NM_011769</a>          | <a href="#">22776</a>  | zinc finger, imprinted 1       | <a href="#">Zim1</a>          | 0.393 | -5.687  | 0.000670329 | 0.00994627  |
| 20916 | 10398382 |                                    |                        |                                |                               | 0.392 | -4.21   | 0.00372734  | 0.0332773   |
| 20917 | 10492890 | <a href="#">NM_030695</a>          | <a href="#">80877</a>  | LPS-responsive beige-like anch | <a href="#">Lrba</a>          | 0.392 | -17.549 | 3.51697e-07 | 7.43628e-05 |
| 20918 | 10458052 | <a href="#">NM_013512</a>          | <a href="#">13824</a>  | erythrocyte protein band 4.1-l | <a href="#">Epb4.114a</a>     | 0.392 | -9.684  | 2.17359e-05 | 0.000999095 |
| 20919 | 10397984 | <a href="#">NM_028980</a>          | <a href="#">74521</a>  | RIKEN cDNA 8430415E04 gene     | <a href="#">8430415E04Rik</a> | 0.391 | -12.08  | 4.79453e-06 | 0.0003692   |
| 20920 | 10367982 | <a href="#">NM_001002268</a>       | <a href="#">215798</a> | G protein-coupled receptor 126 | <a href="#">Gpr126</a>        | 0.39  | -7.556  | 0.000112592 | 0.00301032  |
| 20921 | 10540401 | <a href="#">NM_008516</a>          | <a href="#">16979</a>  | leucine rich repeat protein 1, | <a href="#">Lrrm1</a>         | 0.39  | -6.58   | 0.000272614 | 0.00536864  |
| 20922 | 10603746 | <a href="#">NM_172778</a>          | <a href="#">109731</a> | monoamine oxidase B            | <a href="#">Maob</a>          | 0.39  | -9.387  | 2.6814e-05  | 0.00114768  |
| 20923 | 10585990 |                                    |                        |                                |                               | 0.389 | -8.646  | 4.64693e-05 | 0.00165971  |
| 20924 | 10389775 | <a href="#">NM_008796</a>          | <a href="#">18559</a>  | phosphatidylcholine transfer p | <a href="#">Pctp</a>          | 0.388 | -17.028 | 4.35075e-07 | 8.43966e-05 |
| 20925 | 10351546 | <a href="#">NM_013474</a>          | <a href="#">11807</a>  | apolipoprotein A-II            | <a href="#">Apoa2</a>         | 0.387 | -2.439  | 0.0438068   | 0.1843      |
| 20926 | 10578904 | <a href="#">NM_013494</a>          | <a href="#">12876</a>  | carboxypeptidase E             | <a href="#">Cpe</a>           | 0.387 | -6.771  | 0.000227589 | 0.00480253  |
| 20927 | 10567995 | <a href="#">NM_019738</a>          | <a href="#">56312</a>  | nuclear protein 1              | <a href="#">Nupr1</a>         | 0.386 | -7.546  | 0.00011354  | 0.00302355  |
| 20928 | 10546432 | <a href="#">NM_175314</a>          | <a href="#">101401</a> | a disintegrin-like and metallo | <a href="#">Adams9</a>        | 0.385 | -5.223  | 0.00111192  | 0.0141204   |
| 20929 | 10539894 | <a href="#">NM_011844</a>          | <a href="#">23945</a>  | monoglyceride lipase           | <a href="#">Mgll</a>          | 0.385 | -6.61   | 0.000265031 | 0.00528661  |
| 20930 | 10526191 | <a href="#">BC026208</a>           | <a href="#">80909</a>  | opposite strand transcription  | <a href="#">Gats</a>          | 0.385 | -9.762  | 2.0586e-05  | 0.000965757 |
| 20931 | 10426685 | <a href="#">BC039633</a>           | <a href="#">72778</a>  | RIKEN cDNA 2810451A06 gene     | <a href="#">2810451A06Rik</a> | 0.385 | -12.055 | 4.86303e-06 | 0.000371205 |
| 20932 | 10359561 | <a href="#">NM_144878</a>          | <a href="#">226564</a> | flavin containing monooxygenas | <a href="#">Fmo4</a>          | 0.384 | -5.811  | 0.000588162 | 0.00910442  |
| 20933 | 10504606 | <a href="#">NM_028270</a>          | <a href="#">72535</a>  | aldehyde dehydrogenase 1 famil | <a href="#">Aldh1b1</a>       | 0.382 | -9.286  | 2.88324e-05 | 0.00120006  |
| 20934 | 10517666 | <a href="#">ENSMUST00000097830</a> | <a href="#">73162</a>  | OTU domain containing 3        | <a href="#">Otud3</a>         | 0.382 | -17.873 | 3.0896e-07  | 6.80484e-05 |
| 20935 | 10389877 | <a href="#">ENSMUST00000061469</a> | <a href="#">278507</a> | WAP, follistatin/kazal, immuno | <a href="#">Wfikkn2</a>       | 0.38  | -9.059  | 3.40409e-05 | 0.00134033  |
| 20936 | 10366546 | <a href="#">BC100404</a>           | <a href="#">70574</a>  | carboxypeptidase M             | <a href="#">Cpm</a>           | 0.379 | -9.172  | 3.13185e-05 | 0.00127346  |
| 20937 | 10456653 | <a href="#">NM_201600</a>          | <a href="#">17919</a>  | myosin Vb                      | <a href="#">Myo5b</a>         | 0.378 | -16.927 | 4.53733e-07 | 8.72158e-05 |
| 20938 | 10403303 | <a href="#">NM_013778</a>          | <a href="#">27384</a>  | aldo-keto reductase family 1,  | <a href="#">Akr1c13</a>       | 0.378 | -8.15   | 6.86416e-05 | 0.00213441  |
| 20939 | 10438017 | <a href="#">NM_139232</a>          | <a href="#">224014</a> | FYVE, RhoGEF and PH domain con | <a href="#">Fgd4</a>          | 0.377 | -16.772 | 4.84165e-07 | 9.14034e-05 |
| 20940 | 10351623 | <a href="#">NM_172647</a>          | <a href="#">16456</a>  | F11 receptor                   | <a href="#">F11r</a>          | 0.377 | -6.739  | 0.000234471 | 0.00490372  |
| 20941 | 10535559 | <a href="#">NM_025833</a>          | <a href="#">66898</a>  | BAI1-associated protein 2-like | <a href="#">Baiap2l1</a>      | 0.374 | -11.796 | 5.64915e-06 | 0.000416187 |
| 20942 | 10576332 | <a href="#">NM_023279</a>          | <a href="#">22152</a>  | tubulin, beta 3                | <a href="#">Tubb3</a>         | 0.372 | -6.327  | 0.000348585 | 0.00626742  |
| 20943 | 10409713 | <a href="#">NM_022317</a>          | <a href="#">114304</a> | solute carrier family 28 (sodi | <a href="#">Slc28a3</a>       | 0.369 | -7.825  | 8.96356e-05 | 0.00260359  |
| 20944 | 10427075 | <a href="#">NM_010664</a>          | <a href="#">16668</a>  | keratin 18                     | <a href="#">Krt18</a>         | 0.369 | -9.305  | 2.84435e-05 | 0.0011967   |
| 20945 | 10585986 |                                    |                        |                                |                               | 0.369 | -7.372  | 0.000132124 | 0.003318    |
| 20946 | 10598064 |                                    |                        |                                |                               | 0.368 | -4.326  | 0.00322163  | 0.0301008   |
| 20947 | 10457686 | <a href="#">NM_013505</a>          | <a href="#">13506</a>  | desmocollin 2                  | <a href="#">Dsc2</a>          | 0.368 | -8.089  | 7.21194e-05 | 0.00221964  |
| 20948 | 10435733 | <a href="#">NM_170599</a>          | <a href="#">207683</a> | immunoglobulin superfamily, me | <a href="#">Igsf11</a>        | 0.365 | -13.069 | 2.77979e-06 | 0.000253344 |

|       |          |                                    |                           |                                |                                    |       |         |             |             |
|-------|----------|------------------------------------|---------------------------|--------------------------------|------------------------------------|-------|---------|-------------|-------------|
| 20949 | 10597817 | <a href="#">NM_031161</a>          | <a href="#">12424</a>     | cholecystokinin                | <a href="#">Cck</a>                | 0.362 | -7.599  | 0.000108531 | 0.00294958  |
| 20950 | 10411459 | <a href="#">NM_001025606</a>       | <a href="#">380863</a>    | transmembrane protein 171      | <a href="#">Tmem171</a>            | 0.362 | -10.727 | 1.08498e-05 | 0.000636968 |
| 20951 | 10580635 | <a href="#">NM_053200</a>          | <a href="#">104158</a>    | carboxylesterase 3             | <a href="#">Ces3</a>               | 0.361 | -9.669  | 2.19646e-05 | 0.00100524  |
| 20952 | 10347036 | <a href="#">NM_001039934</a>       | <a href="#">17756</a>     | microtubule-associated protein | <a href="#">Mtap2</a>              | 0.36  | -7.287  | 0.000142316 | 0.00347475  |
| 20953 | 10591749 | <a href="#">AK142481</a>           | <a href="#">69862</a>     | RIKEN cDNA 1810064F22 gene     | <a href="#">1810064F22Rik</a>      | 0.359 | -14.613 | 1.27494e-06 | 0.000161613 |
| 20954 | 10598236 | <a href="#">NM_021431</a>          | <a href="#">58242</a>     | nudix (nucleoside diphosphate  | <a href="#">Nudt11</a>             | 0.359 | -8.416  | 5.55599e-05 | 0.00186897  |
| 20955 | 10396472 | <a href="#">NM_198866</a>          | <a href="#">386753</a>    | DNA binding protein with his-t | <a href="#">Dbpht2</a>             | 0.358 | -20.759 | 1.06925e-07 | 4.03719e-05 |
| 20956 | 10368477 | <a href="#">BC021783</a>           | <a href="#">67719</a>     | RIKEN cDNA 2310057J18 gene     | <a href="#">2310057J18Rik</a>      | 0.356 | -10.916 | 9.62811e-06 | 0.00059364  |
| 20957 | 10501762 | <a href="#">NM_029655</a>          | <a href="#">76561</a>     | sorting nexin 7                | <a href="#">Snx7</a>               | 0.354 | -11.68  | 6.04856e-06 | 0.000435003 |
| 20958 | 10355806 | <a href="#">NM_009447</a>          | <a href="#">22145</a>     | tubulin, alpha 4A              | <a href="#">Tuba4a</a>             | 0.353 | -12.077 | 4.8032e-06  | 0.0003692   |
| 20959 | 10581882 | <a href="#">NM_025583</a>          | <a href="#">66473</a>     | chymotrypsinogen B1            | <a href="#">Ctrb1</a>              | 0.353 | -3.801  | 0.00634423  | 0.0488679   |
| 20960 | 10531790 | <a href="#">NM_144955</a>          | <a href="#">18096</a>     | NK6 transcription factor relat | <a href="#">Nkx6-1</a>             | 0.352 | -14.601 | 1.28223e-06 | 0.000161613 |
| 20961 | 10564539 | <a href="#">NM_001024703</a>       | <a href="#">244049</a>    | multiple C2 domains, transmemb | <a href="#">Mctp2</a>              | 0.352 | -8.789  | 4.16406e-05 | 0.00153847  |
| 20962 | 10363118 | <a href="#">NM_025705</a>          | <a href="#">66686</a>     | discoidin, CUB and LCCL domain | <a href="#">Debld1</a>             | 0.351 | -14.017 | 1.7057e-06  | 0.000189817 |
| 20963 | 10414537 | <a href="#">NM_007447</a>          | <a href="#">11727</a>     | angiogenin, ribonuclease, RNas | <a href="#">Ang</a>                | 0.347 | -14.081 | 1.65221e-06 | 0.000187819 |
| 20964 | 10555460 | <a href="#">NM_019990</a>          | <a href="#">56018</a>     | START domain containing 10     | <a href="#">Stard10</a>            | 0.347 | -14.784 | 1.17539e-06 | 0.00015574  |
| 20965 | 10497487 | <a href="#">XM_975226</a>          | <a href="#">635702</a>    | N-acetylated alpha-linked acid | <a href="#">Naaladl2</a>           | 0.345 | -8.829  | 4.0409e-05  | 0.0015016   |
| 20966 | 10462881 | <a href="#">NM_181748</a>          | <a href="#">107221</a>    | G protein-coupled receptor 120 | <a href="#">Gpr120</a>             | 0.344 | -21.86  | 7.40391e-08 | 3.19486e-05 |
| 20967 | 10363056 | <a href="#">NM_011376</a>          | <a href="#">20464</a>     | single-minded homolog 1 (Droso | <a href="#">Sim1</a>               | 0.342 | -9.059  | 3.40213e-05 | 0.00134033  |
| 20968 | 10361358 | <a href="#">NM_019958</a>          | <a href="#">56533</a>     | regulator of G-protein signali | <a href="#">Rgs17</a>              | 0.34  | -10.229 | 1.49974e-05 | 0.000777221 |
| 20969 | 10561712 | <a href="#">NM_011464</a>          | <a href="#">20733</a>     | serine protease inhibitor, Kun | <a href="#">Spint2</a>             | 0.34  | -15.093 | 1.0165e-06  | 0.000144248 |
| 20970 | 10365545 | <a href="#">NM_008777</a>          | <a href="#">18478</a>     | phenylalanine hydroxylase      | <a href="#">Pah</a>                | 0.34  | -10.409 | 1.33181e-05 | 0.000725768 |
| 20971 | 10353036 | <a href="#">ENSMUST00000097824</a> | <a href="#">100038398</a> | predicted gene, ENSMUSG0000007 | <a href="#">ENSMUSG00000073738</a> | 0.34  | -6.99   | 0.000185881 | 0.00421753  |
| 20972 | 10490845 | <a href="#">NM_025519</a>          | <a href="#">66371</a>     | chromatin modifying protein 4C | <a href="#">Chmp4c</a>             | 0.338 | -13.199 | 2.59442e-06 | 0.000245496 |
| 20973 | 10395058 | <a href="#">NM_134052</a>          | <a href="#">104923</a>    | acireductone dioxygenase 1     | <a href="#">Adi1</a>               | 0.337 | -19.461 | 1.69132e-07 | 4.83261e-05 |
| 20974 | 10595081 | <a href="#">NM_012033</a>          | <a href="#">26944</a>     | tubulointerstitial nephritis a | <a href="#">Tinag</a>              | 0.334 | -5.964  | 0.000502027 | 0.00811534  |
| 20975 | 10513156 | <a href="#">ENSMUST00000075637</a> | <a href="#">545622</a>    | protein tyrosine phosphatase,  | <a href="#">Ptpn3</a>              | 0.334 | -14.152 | 1.59575e-06 | 0.000185387 |
| 20976 | 10562480 | <a href="#">NM_033080</a>          | <a href="#">110959</a>    | nudix (nucleoside diphosphate  | <a href="#">Nudt19</a>             | 0.334 | -11.058 | 8.81146e-06 | 0.000568017 |
| 20977 | 10593167 | <a href="#">D00925</a>             | <a href="#">21399</a>     | transcription elongation facto | <a href="#">Tcea1</a>              | 0.333 | -6.12   | 0.000428354 | 0.00727109  |
| 20978 | 10406905 | <a href="#">NM_183115</a>          | <a href="#">76041</a>     | coiled-coil domain containing  | <a href="#">Ccdc125</a>            | 0.333 | -11.121 | 8.47577e-06 | 0.000551421 |
| 20979 | 10544906 | <a href="#">BC080818</a>           | <a href="#">68252</a>     | RIKEN cDNA A030007L17 gene     | <a href="#">A030007L17Rik</a>      | 0.332 | -14.925 | 1.09968e-06 | 0.00015001  |
| 20980 | 10396936 | <a href="#">NM_022316</a>          | <a href="#">64075</a>     | SPARC related modular calcium  | <a href="#">Smoc1</a>              | 0.332 | -8.226  | 6.45703e-05 | 0.00205963  |
| 20981 | 10498741 | <a href="#">NM_026460</a>          | <a href="#">67931</a>     | serine (or cysteine) peptidase | <a href="#">Serpini2</a>           | 0.331 | -2.724  | 0.0287693   | 0.139358    |
| 20982 | 10404359 | <a href="#">NM_153546</a>          | <a href="#">218121</a>    | membrane bound O-acyltransfera | <a href="#">Mboat1</a>             | 0.329 | -9.83   | 1.96474e-05 | 0.000937755 |
| 20983 | 10574027 | <a href="#">NM_013602</a>          | <a href="#">17748</a>     | metallothionein 1              | <a href="#">Mt1</a>                | 0.328 | -18.759 | 2.19448e-07 | 5.80001e-05 |
| 20984 | 10498448 | <a href="#">NM_183191</a>          | <a href="#">269437</a>    | phospholipase C, eta 1         | <a href="#">Plech1</a>             | 0.328 | -14.989 | 1.06721e-06 | 0.000149759 |
| 20985 | 10420899 | <a href="#">NM_178747</a>          | <a href="#">268756</a>    | gulonolactone (L-) oxidase     | <a href="#">Gulo</a>               | 0.326 | -8.957  | 3.67095e-05 | 0.00140613  |
| 20986 | 10354529 | <a href="#">BC048645</a>           | <a href="#">67080</a>     | RIKEN cDNA 1700019D03 gene     | <a href="#">1700019D03Rik</a>      | 0.324 | -9.198  | 3.07194e-05 | 0.00125878  |
| 20987 | 10469565 | <a href="#">NM_018809</a>          | <a href="#">19213</a>     | pancreas specific transcriptio | <a href="#">Prfla</a>              | 0.324 | -       | 1.47101e-06 | 0.000176721 |

|       |          |                                    |                        |                                |                               |       |         |             |             |
|-------|----------|------------------------------------|------------------------|--------------------------------|-------------------------------|-------|---------|-------------|-------------|
| 20987 | 10467153 | <a href="#">NM_172838</a>          | <a href="#">240638</a> | pancreatic specific transcrip  | <a href="#">Slc16a12</a>      | 0.32  | -8.387  | 5.68151e-05 | 0.00188652  |
| 20988 | 10467153 | <a href="#">NM_172838</a>          | <a href="#">240638</a> | solute carrier family 16 (mono | <a href="#">Slc16a12</a>      | 0.32  | -8.387  | 5.68151e-05 | 0.00188652  |
| 20989 | 10361956 | <a href="#">NM_008635</a>          | <a href="#">17761</a>  | microtubule-associated protein | <a href="#">Mtap7</a>         | 0.319 | -13.138 | 2.67983e-06 | 0.000250979 |
| 20990 | 10488366 | <a href="#">NM_010919</a>          | <a href="#">18088</a>  | NK2 transcription factor relat | <a href="#">Nkx2-2</a>        | 0.318 | -11.588 | 6.38572e-06 | 0.000453676 |
| 20991 | 10416057 | <a href="#">NM_013492</a>          | <a href="#">12759</a>  | clusterin                      | <a href="#">Clu</a>           | 0.317 | -12.548 | 3.68524e-06 | 0.000309209 |
| 20992 | 10485624 | <a href="#">NM_178695</a>          | <a href="#">228413</a> | proline rich Gla (G-carboxyglu | <a href="#">Prrg4</a>         | 0.313 | -10.553 | 1.21263e-05 | 0.00068336  |
| 20993 | 10502224 | <a href="#">NM_028943</a>          | <a href="#">74442</a>  | sphingomyelin synthase 2       | <a href="#">Sgms2</a>         | 0.311 | -10.623 | 1.15936e-05 | 0.000667944 |
| 20994 | 10420362 | <a href="#">NM_008125</a>          | <a href="#">14619</a>  | gap junction protein, beta 2   | <a href="#">Gjb2</a>          | 0.31  | -9.817  | 1.98108e-05 | 0.000940559 |
| 20995 | 10456237 | <a href="#">NM_009182</a>          | <a href="#">20451</a>  | ST8 alpha-N-acetyl-neuraminide | <a href="#">St8sia3</a>       | 0.306 | -11.289 | 7.64707e-06 | 0.000511676 |
| 20996 | 10480003 | <a href="#">NM_010582</a>          | <a href="#">16425</a>  | inter-alpha trypsin inhibitor, | <a href="#">Itih2</a>         | 0.306 | -6.812  | 0.000218977 | 0.00469892  |
| 20997 | 10542917 | <a href="#">BC096374</a>           | <a href="#">101202</a> | expressed sequence AI987662    | <a href="#">AI987662</a>      | 0.301 | -15.45  | 8.62559e-07 | 0.000129704 |
| 20998 | 10407126 | <a href="#">NM_152804</a>          | <a href="#">20620</a>  | polo-like kinase 2 (Drosophila | <a href="#">Plk2</a>          | 0.296 | -13.973 | 1.74347e-06 | 0.000191999 |
| 20999 | 10423855 | <a href="#">NM_053271</a>          | <a href="#">116838</a> | regulating synaptic membrane e | <a href="#">Rims2</a>         | 0.295 | -22.293 | 6.44078e-08 | 2.96052e-05 |
| 21000 | 10513166 | <a href="#">NM_011207</a>          | <a href="#">545622</a> | protein tyrosine phosphatase,  | <a href="#">Ptpn3</a>         | 0.295 | -18.429 | 2.48799e-07 | 6.09446e-05 |
| 21001 | 10505623 | <a href="#">BC030404</a>           | <a href="#">52829</a>  | DNA segment, Chr 4, Brigham &  | <a href="#">D4Bwg0951e</a>    | 0.294 | -8.012  | 7.68287e-05 | 0.00231859  |
| 21002 | 10559420 | <a href="#">NM_181820</a>          | <a href="#">353499</a> | transmembrane channel-like gen | <a href="#">Tmc4</a>          | 0.293 | -25.112 | 2.75539e-08 | 2.27641e-05 |
| 21003 | 10497214 | <a href="#">NM_001025261</a>       | <a href="#">21985</a>  | tumor protein D52              | <a href="#">Tpd52</a>         | 0.29  | -9.603  | 2.30048e-05 | 0.00102927  |
| 21004 | 10513152 | <a href="#">ENSMUST00000075637</a> | <a href="#">545622</a> | protein tyrosine phosphatase,  | <a href="#">Ptpn3</a>         | 0.29  | -9.761  | 2.05995e-05 | 0.000965757 |
| 21005 | 10355176 | <a href="#">BC051128</a>           | <a href="#">70861</a>  | RIKEN cDNA 4921521F21 gene     | <a href="#">4921521F21Rik</a> | 0.289 | -11.017 | 9.03675e-06 | 0.00057901  |
| 21006 | 10485402 | <a href="#">NM_010218</a>          | <a href="#">14221</a>  | four jointed box 1 (Drosophila | <a href="#">Fjx1</a>          | 0.289 | -22.796 | 5.49299e-08 | 2.63963e-05 |
| 21007 | 10382328 | <a href="#">NM_011448</a>          | <a href="#">20682</a>  | SRY-box containing gene 9      | <a href="#">Sox9</a>          | 0.285 | -18.72  | 2.22714e-07 | 5.81367e-05 |
| 21008 | 10459421 | <a href="#">NM_001001488</a>       | <a href="#">54670</a>  | ATPase, class I, type 8B, memb | <a href="#">Atp8b1</a>        | 0.283 | -18.885 | 2.09281e-07 | 5.6013e-05  |
| 21009 | 10348410 | <a href="#">NM_029269</a>          | <a href="#">75396</a>  | secreted phosphoprotein 2      | <a href="#">Spp2</a>          | 0.282 | -15.601 | 8.05891e-07 | 0.000124642 |
| 21010 | 10476868 | <a href="#">ENSMUST00000066038</a> | <a href="#">78068</a>  | RIKEN cDNA 6430503K07 gene     | <a href="#">6430503K07Rik</a> | 0.281 | -16.26  | 6.02419e-07 | 0.000102722 |
| 21011 | 10407072 | <a href="#">NM_029001</a>          | <a href="#">74559</a>  | ELOVL family member 7, elongat | <a href="#">Elov17</a>        | 0.28  | -12.784 | 3.23915e-06 | 0.000284185 |
| 21012 | 10530059 | <a href="#">NM_172710</a>          | <a href="#">231238</a> | RIKEN cDNA 2310045A20 gene     | <a href="#">2310045A20Rik</a> | 0.279 | -15.725 | 7.62152e-07 | 0.000123015 |
| 21013 | 10408838 | <a href="#">NM_019423</a>          | <a href="#">54326</a>  | elongation of very long chain  | <a href="#">Elov12</a>        | 0.275 | -18.373 | 2.54238e-07 | 6.09446e-05 |
| 21014 | 10445325 | <a href="#">NM_030598</a>          | <a href="#">53901</a>  | regulator of calcineurin 2     | <a href="#">Rcan2</a>         | 0.273 | -17.468 | 3.63344e-07 | 7.55229e-05 |
| 21015 | 10353346 | <a href="#">NM_153179</a>          | <a href="#">241035</a> | polycystic kidney and hepatic  | <a href="#">Pkhd1</a>         | 0.273 | -12.074 | 4.81242e-06 | 0.0003692   |
| 21016 | 10499412 | <a href="#">NM_016899</a>          | <a href="#">53868</a>  | RAB25, member RAS oncogene fam | <a href="#">Rab25</a>         | 0.271 | -11.786 | 5.68336e-06 | 0.000417253 |
| 21017 | 10565152 | <a href="#">ENSMUST00000098326</a> | <a href="#">319890</a> | RIKEN cDNA 9330120H11 gene     | <a href="#">9330120H11Rik</a> | 0.27  | -19.021 | 1.98871e-07 | 5.39092e-05 |
| 21018 | 10513154 | <a href="#">ENSMUST00000075637</a> | <a href="#">545622</a> | protein tyrosine phosphatase,  | <a href="#">Ptpn3</a>         | 0.269 | -11.493 | 6.7607e-06  | 0.000470224 |
| 21019 | 10419288 | <a href="#">NM_008102</a>          | <a href="#">14528</a>  | GTP cyclohydrolase 1           | <a href="#">Gch1</a>          | 0.269 | -17.972 | 2.97179e-07 | 6.61923e-05 |
| 21020 | 10363545 | <a href="#">NM_009719</a>          | <a href="#">11925</a>  | neurogenin 3                   | <a href="#">Neurog3</a>       | 0.268 | -4.845  | 0.00171744  | 0.0192339   |
| 21021 | 10545958 | <a href="#">NM_013471</a>          | <a href="#">11746</a>  | annexin A4                     | <a href="#">Anxa4</a>         | 0.267 | -12.104 | 4.72893e-06 | 0.000367604 |
| 21022 | 10513158 | <a href="#">ENSMUST00000075637</a> | <a href="#">545622</a> | protein tyrosine phosphatase,  | <a href="#">Ptpn3</a>         | 0.267 | -8.555  | 4.98436e-05 | 0.00173338  |

|       |          |                                    |                        |                                |                               |       |         |             |             |
|-------|----------|------------------------------------|------------------------|--------------------------------|-------------------------------|-------|---------|-------------|-------------|
| 21023 | 10433782 | <a href="#">NM_025769</a>          | <a href="#">66793</a>  | EF hand calcium binding domain | <a href="#">Efcab1</a>        | 0.267 | -16.227 | 6.10892e-07 | 0.000103334 |
| 21024 | 10431659 | <a href="#">NM_001109040</a>       | <a href="#">16564</a>  | kinesin family member 21A      | <a href="#">Kif21a</a>        | 0.265 | -21.307 | 8.88667e-08 | 3.61346e-05 |
| 21025 | 10508405 | <a href="#">NM_025452</a>          | <a href="#">66260</a>  | transmembrane protein 54       | <a href="#">Tmem54</a>        | 0.264 | -16.009 | 6.72064e-07 | 0.000111017 |
| 21026 | 10592001 | <a href="#">NM_011176</a>          | <a href="#">19143</a>  | suppression of tumorigenicity  | <a href="#">St14</a>          | 0.263 | -16.196 | 6.19294e-07 | 0.000103923 |
| 21027 | 10506004 | <a href="#">NM_030014</a>          | <a href="#">77963</a>  | hook homolog 1 (Drosophila)    | <a href="#">Hook1</a>         | 0.262 | -22.872 | 5.36456e-08 | 2.63786e-05 |
| 21028 | 10587082 | <a href="#">NM_008262</a>          | <a href="#">15379</a>  | one cut domain, family member  | <a href="#">Onecut1</a>       | 0.261 | -24.084 | 3.71263e-08 | 2.29448e-05 |
| 21029 | 10564818 | <a href="#">NM_008486</a>          | <a href="#">16790</a>  | alanyl (membrane) aminopeptida | <a href="#">Anpep</a>         | 0.254 | -16.458 | 5.52975e-07 | 9.74342e-05 |
| 21030 | 10462818 | <a href="#">NM_008245</a>          | <a href="#">15242</a>  | hematopoietically expressed ho | <a href="#">Hhex</a>          | 0.254 | -8.226  | 6.45827e-05 | 0.00205963  |
| 21031 | 10546962 | <a href="#">NM_021488</a>          | <a href="#">58991</a>  | ghrelin                        | <a href="#">Ghrl</a>          | 0.25  | -16.459 | 5.52915e-07 | 9.74342e-05 |
| 21032 | 10474312 | <a href="#">NM_013627</a>          | <a href="#">18508</a>  | paired box gene 6              | <a href="#">Pax6</a>          | 0.25  | -24.584 | 3.20625e-08 | 2.29448e-05 |
| 21033 | 10432918 | <a href="#">NM_031170</a>          | <a href="#">16691</a>  | keratin 8                      | <a href="#">Krt8</a>          | 0.243 | -14.97  | 1.07659e-06 | 0.000149759 |
| 21034 | 10443463 | <a href="#">NM_007669</a>          | <a href="#">12575</a>  | cyclin-dependent kinase inhibi | <a href="#">Cdkn1a</a>        | 0.241 | -15.596 | 8.07605e-07 | 0.000124642 |
| 21035 | 10513145 | <a href="#">ENSMUST00000075637</a> | <a href="#">545622</a> | protein tyrosine phosphatase,  | <a href="#">Ptpn3</a>         | 0.239 | -18.083 | 2.84514e-07 | 6.53889e-05 |
| 21036 | 10404649 | <a href="#">BC033467</a>           | <a href="#">109620</a> | desmoplakin                    | <a href="#">Dsp</a>           | 0.239 | -12.229 | 4.40581e-06 | 0.000348901 |
| 21037 | 10396466 | <a href="#">ENSMUST00000095617</a> | <a href="#">74284</a>  | RIKEN cDNA 1700086L19 gene     | <a href="#">1700086L19Rik</a> | 0.237 | -8.054  | 7.42222e-05 | 0.00226458  |
| 21038 | 10424113 | <a href="#">NM_178920</a>          | <a href="#">105853</a> | mal, T-cell differentiation pr | <a href="#">Mal2</a>          | 0.236 | -20.51  | 1.16496e-07 | 4.04969e-05 |
| 21039 | 10490559 | <a href="#">NM_015730</a>          | <a href="#">11438</a>  | cholinergic receptor, nicotini | <a href="#">Chrna4</a>        | 0.236 | -13.898 | 1.81104e-06 | 0.000196372 |
| 21040 | 10530269 | <a href="#">NM_178446</a>          | <a href="#">245945</a> | RNA binding motif protein 47   | <a href="#">Rbm47</a>         | 0.235 | -17.28  | 3.92155e-07 | 7.94047e-05 |
| 21041 | 10379765 | <a href="#">NM_009330</a>          | <a href="#">21410</a>  | HNF1 homeobox B                | <a href="#">Hnf1b</a>         | 0.23  | -23.859 | 3.96996e-08 | 2.29448e-05 |
| 21042 | 10484276 | <a href="#">NM_010894</a>          | <a href="#">18012</a>  | neurogenic differentiation 1   | <a href="#">Neurod1</a>       | 0.229 | -10.046 | 1.69554e-05 | 0.000841289 |
| 21043 | 10501963 | <a href="#">NM_011674</a>          | <a href="#">22239</a>  | UDP galactosyltransferase 8A   | <a href="#">Ugt8a</a>         | 0.228 | -10.959 | 9.36993e-06 | 0.000586067 |
| 21044 | 10472350 | <a href="#">NM_145523</a>          | <a href="#">227960</a> | grancalcin                     | <a href="#">Gca</a>           | 0.226 | -13.512 | 2.20353e-06 | 0.00022508  |
| 21045 | 10380927 | <a href="#">NM_010346</a>          | <a href="#">14786</a>  | growth factor receptor bound p | <a href="#">Grb7</a>          | 0.226 | -24.064 | 3.73452e-08 | 2.29448e-05 |
| 21046 | 10492735 | <a href="#">NM_133862</a>          | <a href="#">99571</a>  | fibrinogen, gamma polypeptide  | <a href="#">Fgg</a>           | 0.224 | -22.41  | 6.20414e-08 | 2.91512e-05 |
| 21047 | 10360328 | <a href="#">NM_011318</a>          | <a href="#">20219</a>  | serum amyloid P-component      | <a href="#">Apcs</a>          | 0.223 | -16.473 | 5.49468e-07 | 9.74342e-05 |
| 21048 | 10530615 | <a href="#">NM_026950</a>          | <a href="#">433904</a> | OCIA domain containing 2       | <a href="#">Ociad2</a>        | 0.221 | -16.404 | 5.66015e-07 | 9.89076e-05 |
| 21049 | 10402360 | <a href="#">NM_144834</a>          | <a href="#">217847</a> | serine (or cysteine) peptidase | <a href="#">Serpina10</a>     | 0.22  | -24.354 | 3.42941e-08 | 2.29448e-05 |
| 21050 | 10492174 | <a href="#">NM_145539</a>          | <a href="#">229302</a> | transmembrane 4 superfamily me | <a href="#">Tm4sf4</a>        | 0.219 | -21.365 | 8.71454e-08 | 3.61295e-05 |
| 21051 | 10587150 | <a href="#">NM_001081322</a>       | <a href="#">208943</a> | myosin VC                      | <a href="#">Myo5c</a>         | 0.219 | -31.702 | 5.20151e-09 | 1.14953e-05 |
| 21052 | 10428619 | <a href="#">NM_015744</a>          | <a href="#">18606</a>  | ectonucleotide pyrophosphatase | <a href="#">Enpp2</a>         | 0.215 | -17.267 | 3.94319e-07 | 7.94047e-05 |
| 21053 | 10478525 | <a href="#">NM_026323</a>          | <a href="#">67701</a>  | WAP four-disulfide core domain | <a href="#">Wfdc2</a>         | 0.21  | -15.7   | 7.70784e-07 | 0.000123466 |
| 21054 | 10491952 | <a href="#">NM_174995</a>          | <a href="#">211666</a> | microsomal glutathione S-trans | <a href="#">Mgst2</a>         | 0.205 | -13.975 | 1.74218e-06 | 0.000191999 |
| 21055 | 10501811 | <a href="#">NM_145394</a>          | <a href="#">213603</a> | solute carrier family 44, memb | <a href="#">Slc44a3</a>       | 0.205 | -12.491 | 3.80371e-06 | 0.000317888 |
| 21056 | 10491171 | <a href="#">NM_031197</a>          | <a href="#">20526</a>  | solute carrier family 2 (facil | <a href="#">Slc2a2</a>        | 0.202 | -20.887 | 1.02352e-07 | 4.00763e-05 |
| 21057 | 10468762 | <a href="#">NM_001114312</a>       | <a href="#">71653</a>  | RIKEN cDNA 4930506M07 gene     | <a href="#">4930506M07Rik</a> | 0.201 | -19.918 | 1.43431e-07 | 4.26325e-05 |

|       |          |                                    |                        |                                |                               |       |         |             |             |
|-------|----------|------------------------------------|------------------------|--------------------------------|-------------------------------|-------|---------|-------------|-------------|
| 21058 | 10416451 | <a href="#">NM_019172</a>          | <a href="#">26573</a>  | carboxypeptidase B2 (plasma)   | <a href="#">Cpb2</a>          | 0.201 | 19.923  | 1.43174e-07 | 4.26325e-05 |
| 21059 | 10474936 | <a href="#">NM_016907</a>          | <a href="#">20732</a>  | serine protease inhibitor, Kun | <a href="#">Spint1</a>        | 0.198 | -24.295 | 3.48876e-08 | 2.29448e-05 |
| 21060 | 10373467 | <a href="#">NM_010153</a>          | <a href="#">13867</a>  | v-erb-b2 erythroblastic leukem | <a href="#">ErbB3</a>         | 0.193 | -14.046 | 1.68116e-06 | 0.000189077 |
| 21061 | 10542632 | <a href="#">NM_010491</a>          | <a href="#">15874</a>  | islet amyloid polypeptide      | <a href="#">Iapp</a>          | 0.193 | -7.023  | 0.000180317 | 0.00412621  |
| 21062 | 10493474 | <a href="#">NM_013605</a>          | <a href="#">17829</a>  | mucin 1, transmembrane         | <a href="#">Muc1</a>          | 0.19  | -22.001 | 7.07319e-08 | 3.11574e-05 |
| 21063 | 10377673 | <a href="#">NM_016887</a>          | <a href="#">53624</a>  | claudin 7                      | <a href="#">Cldn7</a>         | 0.188 | 22.135  | 6.77343e-08 | 3.04718e-05 |
| 21064 | 10530089 | <a href="#">NM_009827</a>          | <a href="#">12425</a>  | cholecystokinin A receptor     | <a href="#">Cckar</a>         | 0.183 | -18.343 | 2.57165e-07 | 6.09446e-05 |
| 21065 | 10362138 | <a href="#">NM_011704</a>          | <a href="#">22361</a>  | vanin 1                        | <a href="#">Vnn1</a>          | 0.183 | -12.464 | 3.86249e-06 | 0.000320269 |
| 21066 | 10354003 | <a href="#">NM_173870</a>          | <a href="#">269181</a> | mannoside acetylglucosaminyltr | <a href="#">Mgat4a</a>        | 0.181 | -11     | 9.13518e-06 | 0.000580043 |
| 21067 | 10536505 | <a href="#">NM_008591</a>          | <a href="#">17295</a>  | met proto-oncogene             | <a href="#">Met</a>           | 0.18  | -10.978 | 9.25767e-06 | 0.000580843 |
| 21068 | 10440522 | <a href="#">NM_009621</a>          | <a href="#">11504</a>  | a disintegrin-like and metallo | <a href="#">Adamts1</a>       | 0.179 | -14.156 | 1.59244e-06 | 0.000185387 |
| 21069 | 10423623 | <a href="#">BC030476</a>           | <a href="#">239368</a> | cDNA sequence BC030476         | <a href="#">BC030476</a>      | 0.178 | -27.345 | 1.4989e-08  | 1.7607e-05  |
| 21070 | 10399202 | <a href="#">ENSMUST00000048880</a> | <a href="#">238455</a> | RIKEN cDNA 4732474O15 gene     | <a href="#">4732474O15Rik</a> | 0.177 | -20.136 | 1.32758e-07 | 4.16289e-05 |
| 21071 | 10386211 | <a href="#">BC117741</a>           | <a href="#">75429</a>  | RIKEN cDNA 3100002J23 gene     | <a href="#">3100002J23Rik</a> | 0.176 | -20.113 | 1.3388e-07  | 4.16289e-05 |
| 21072 | 10587077 | <a href="#">BC023444</a>           | <a href="#">15379</a>  | one cut domain, family member  | <a href="#">Onecut1</a>       | 0.174 | -28.384 | 1.14802e-08 | 1.5171e-05  |
| 21073 | 10523095 | <a href="#">NM_145146</a>          | <a href="#">280662</a> | afamin                         | <a href="#">Afm</a>           | 0.173 | -24.196 | 3.59175e-08 | 2.29448e-05 |
| 21074 | 10476355 | <a href="#">NM_007694</a>          | <a href="#">12653</a>  | chromogranin B                 | <a href="#">Chgb</a>          | 0.173 | -10.753 | 1.06669e-05 | 0.000636968 |
| 21075 | 10368289 | <a href="#">NM_008813</a>          | <a href="#">18605</a>  | ectonucleotide pyrophosphatase | <a href="#">Enpp1</a>         | 0.172 | -14.116 | 1.6243e-06  | 0.000187673 |
| 21076 | 10551836 | <a href="#">NM_009944</a>          | <a href="#">12865</a>  | cytochrome c oxidase, subunit  | <a href="#">Cox7a1</a>        | 0.169 | -13.672 | 2.02982e-06 | 0.000212468 |
| 21077 | 10467887 | <a href="#">NM_030703</a>          | <a href="#">93721</a>  | carboxypeptidase N, polypeptid | <a href="#">Cpn1</a>          | 0.169 | -23.321 | 4.67024e-08 | 2.40848e-05 |
| 21078 | 10407327 | <a href="#">NM_010330</a>          | <a href="#">13723</a>  | embigin                        | <a href="#">Emb</a>           | 0.168 | -17.461 | 3.64327e-07 | 7.55229e-05 |
| 21079 | 10523062 | <a href="#">NM_009654</a>          | <a href="#">11657</a>  | albumin                        | <a href="#">Alb</a>           | 0.168 | -3.158  | 0.0153526   | 0.0919852   |
| 21080 | 10436958 | <a href="#">NM_172469</a>          | <a href="#">209195</a> | chloride intracellular channel | <a href="#">Clc6</a>          | 0.168 | -30.816 | 6.37253e-09 | 1.22492e-05 |
| 21081 | 10454172 | <a href="#">NM_007883</a>          | <a href="#">13511</a>  | desmoglein 2                   | <a href="#">Dsg2</a>          | 0.166 | -15.158 | 9.86341e-07 | 0.000140913 |
| 21082 | 10487994 | <a href="#">NM_198029</a>          | <a href="#">241639</a> | RIKEN cDNA 5830467P10 gene     | <a href="#">5830467P10Rik</a> | 0.165 | -10.767 | 1.05765e-05 | 0.00063351  |
| 21083 | 10404250 | <a href="#">NM_177577</a>          | <a href="#">195208</a> | doublecortin domain containing | <a href="#">Dcdc2a</a>        | 0.165 | -8.868  | 3.92512e-05 | 0.0014663   |
| 21084 | 10442327 | <a href="#">NM_018777</a>          | <a href="#">54419</a>  | claudin 6                      | <a href="#">Cldn6</a>         | 0.164 | -14.085 | 1.64962e-06 | 0.000187819 |
| 21085 | 10407445 | <a href="#">NM_013777</a>          | <a href="#">622402</a> | aldo-keto reductase family 1,  | <a href="#">Akr1c12</a>       | 0.163 | -13.954 | 1.7604e-06  | 0.000192859 |
| 21086 | 10542470 | <a href="#">NM_019946</a>          | <a href="#">56615</a>  | microsomal glutathione S-trans | <a href="#">Mgst1</a>         | 0.163 | 33.159  | 3.769e-09   | 1.13845e-05 |
| 21087 | 10501374 | <a href="#">NM_001033304</a>       | <a href="#">229722</a> | RIKEN cDNA 5330417C22 gene     | <a href="#">5330417C22Rik</a> | 0.161 | -29.955 | 7.80704e-09 | 1.28491e-05 |
| 21088 | 10560431 | <a href="#">NM_008260</a>          | <a href="#">15377</a>  | forkhead box A3                | <a href="#">Foxa3</a>         | 0.161 | -14.32  | 1.46914e-06 | 0.000176721 |
| 21089 | 10574023 | <a href="#">NM_008630</a>          | <a href="#">17750</a>  | metallothionein 2              | <a href="#">Mt2</a>           | 0.16  | -7.551  | 0.000113059 | 0.00301454  |
| 21090 | 10423770 | <a href="#">NM_026496</a>          | <a href="#">252973</a> | grainyhead-like 2 (Drosophila) | <a href="#">Grhl2</a>         | 0.157 | -24.124 | 3.66895e-08 | 2.29448e-05 |
| 21091 | 10476633 | <a href="#">NM_008792</a>          | <a href="#">18549</a>  | proprotein convertase subtilis | <a href="#">Pcsk2</a>         | 0.157 | -18.503 | 2.41868e-07 | 6.01655e-05 |
| 21092 | 10483074 | <a href="#">NM_008100</a>          | <a href="#">14526</a>  | glucagon                       | <a href="#">Gcg</a>           | 0.156 | -5.15   | 0.00120745  | 0.0150621   |
| 21093 | 10379190 | <a href="#">NM_011707</a>          | <a href="#">22370</a>  | vitronectin                    | <a href="#">Vtn</a>           | 0.15  | -20.031 | 1.37779e-07 | 4.22202e-05 |

|       |          |                              |                        |                                |                               |       |                   |             |             |
|-------|----------|------------------------------|------------------------|--------------------------------|-------------------------------|-------|-------------------|-------------|-------------|
| 21094 | 10527565 | <a href="#">NM_008814</a>    | <a href="#">18609</a>  | pancreatic and duodenal homeob | <a href="#">Pdx1</a>          | 0.15  | -29.44            | 8.83995e-09 | 1.28491e-05 |
| 21095 | 10497490 | <a href="#">XM_975226</a>    | <a href="#">635702</a> | N-acetylated alpha-linked acid | <a href="#">Naaladl2</a>      | 0.144 | -15.53            | 8.32142e-07 | 0.000126581 |
| 21096 | 10462484 | <a href="#">NM_001081074</a> | <a href="#">69865</a>  | APOBEC1 complementation factor | <a href="#">A1cf</a>          | 0.144 | -18.331           | 2.58414e-07 | 6.09446e-05 |
| 21097 | 10595033 | <a href="#">NM_009130</a>    | <a href="#">20255</a>  | secretogranin III              | <a href="#">Scg3</a>          | 0.142 | -26.827           | 1.71887e-08 | 1.81719e-05 |
| 21098 | 10363090 | <a href="#">NM_177306</a>    | <a href="#">320995</a> | regulatory factor X domain con | <a href="#">Rfxdc1</a>        | 0.14  | -19.884           | 1.45173e-07 | 4.26325e-05 |
| 21099 | 10351852 | <a href="#">NM_007768</a>    | <a href="#">12944</a>  | C-reactive protein, pentraxin- | <a href="#">Crp</a>           | 0.14  | -17.836           | 3.1362e-07  | 6.80781e-05 |
| 21100 | 10595070 | <a href="#">BC120577</a>     | <a href="#">208994</a> | RIKEN cDNA C530008M07 gene     | <a href="#">C530008M07Rik</a> | 0.137 | -14.95            | 1.08702e-06 | 0.00015001  |
| 21101 | 10411668 | <a href="#">NM_008756</a>    | <a href="#">18260</a>  | occludin                       | <a href="#">Ocln</a>          | 0.136 | -31.507           | 5.43665e-09 | 1.14953e-05 |
| 21102 | 10474129 | <a href="#">NM_173749</a>    | <a href="#">210622</a> | RIKEN cDNA E430002G05 gene     | <a href="#">E430002G05Rik</a> | 0.13  | -16.046           | 6.61224e-07 | 0.000110086 |
| 21103 | 10471567 | <a href="#">AK147796</a>     | <a href="#">329385</a> | Riken cDNA C130021I20 gene     | <a href="#">C130021I20Rik</a> | 0.13  | -20.804           | 1.05314e-07 | 4.03719e-05 |
| 21104 | 10363455 | <a href="#">NM_025273</a>    | <a href="#">13180</a>  | pterin 4 alpha carbinolamine d | <a href="#">Pcbd1</a>         | 0.122 | -20.606           | 1.12721e-07 | 4.04969e-05 |
| 21105 | 10464313 | <a href="#">NM_018874</a>    | <a href="#">18946</a>  | pancreatic lipase related prot | <a href="#">Pnliprp1</a>      | 0.121 | -8.132            | 6.96765e-05 | 0.00216018  |
| 21106 | 10447383 | <a href="#">NM_008532</a>    | <a href="#">17075</a>  | tumor-associated calcium signa | <a href="#">Tacstd1</a>       | 0.121 | -23.741           | 4.11228e-08 | 2.29448e-05 |
| 21107 | 10523078 | <a href="#">NM_007423</a>    | <a href="#">11576</a>  | alpha fetoprotein              | <a href="#">Afp</a>           | 0.121 | -4.904            | 0.00160282  | 0.0183009   |
| 21108 | 10560618 | <a href="#">NM_007469</a>    | <a href="#">11812</a>  | apolipoprotein C-I             | <a href="#">Apocl</a>         | 0.119 | -28.07            | 1.24318e-08 | 1.54622e-05 |
| 21109 | 10391561 | <a href="#">NM_145435</a>    | <a href="#">217212</a> | peptide YY                     | <a href="#">Pyy</a>           | 0.119 | -23.808           | 4.03044e-08 | 2.29448e-05 |
| 21110 | 10449467 | <a href="#">NM_025469</a>    | <a href="#">109791</a> | colipase, pancreatic           | <a href="#">Clps</a>          | 0.118 | -20.434           | 1.19625e-07 | 4.04969e-05 |
| 21111 | 10395925 | <a href="#">NM_177321</a>    | <a href="#">338320</a> | melanoma inhibitory activity 2 | <a href="#">Mia2</a>          | 0.115 | -                 | 9.11545e-09 | 1.28491e-05 |
| 21112 | 10467319 | <a href="#">NM_011255</a>    | <a href="#">19662</a>  | retinol binding protein 4, pla | <a href="#">Rbp4</a>          | 0.113 | -29.314<br>10.347 | 1.3871e-05  | 0.000740626 |
| 21113 | 10359689 | <a href="#">NM_009721</a>    | <a href="#">11931</a>  | ATPase, Na+/K+ transporting, b | <a href="#">Atp1b1</a>        | 0.109 | -20.699           | 1.09146e-07 | 4.04873e-05 |
| 21114 | 10603573 | <a href="#">NM_177704</a>    | <a href="#">236643</a> | synaptotagmin-like 5           | <a href="#">Syt5</a>          | 0.105 | -22.905           | 5.31096e-08 | 2.63786e-05 |
| 21115 | 10454192 | <a href="#">NM_013697</a>    | <a href="#">22139</a>  | transthyretin                  | <a href="#">Ttr</a>           | 0.103 | -8.775            | 4.20807e-05 | 0.0015474   |
| 21116 | 10537051 | <a href="#">NM_025350</a>    | <a href="#">109697</a> | carboxypeptidase A1            | <a href="#">Cpa1</a>          | 0.1   | -26.842           | 1.71167e-08 | 1.81719e-05 |
| 21117 | 10531034 | <a href="#">NM_153598</a>    | <a href="#">100727</a> | UDP glucuronosyltransferase 2  | <a href="#">Ugt2b34</a>       | 0.098 | -13.613           | 2.09192e-06 | 0.00021789  |
| 21118 | 10411680 | <a href="#">NM_001038602</a> | <a href="#">218518</a> | MARVEL (membrane-associating)  | <a href="#">Marveld2</a>      | 0.094 | -38.169           | 1.37329e-09 | 6.19394e-06 |
| 21119 | 10575052 | <a href="#">NM_009864</a>    | <a href="#">12550</a>  | cadherin 1                     | <a href="#">Cdh1</a>          | 0.089 | -26.334           | 1.96246e-08 | 1.88611e-05 |
| 21120 | 10458704 | <a href="#">NM_009258</a>    | <a href="#">20730</a>  | serine peptidase inhibitor, Ka | <a href="#">Spink3</a>        | 0.086 | -7.562            | 0.00011204  | 0.00301032  |
| 21121 | 10358210 | <a href="#">NM_030676</a>    | <a href="#">26424</a>  | nuclear receptor subfamily 5,  | <a href="#">Nr5a2</a>         | 0.083 | -16.35            | 5.79451e-07 | 0.000100426 |
| 21122 | 10345065 | <a href="#">NM_001077353</a> | <a href="#">14859</a>  | glutathione S-transferase, alp | <a href="#">Gsta3</a>         | 0.081 | -21.135           | 9.41409e-08 | 3.75569e-05 |
| 21123 | 10392687 | <a href="#">BC038904</a>     | <a href="#">217294</a> | cDNA sequence BC006965         | <a href="#">BC006965</a>      | 0.08  | -25.455           | 2.50062e-08 | 2.27641e-05 |
| 21124 | 10603059 | <a href="#">NM_020626</a>    | <a href="#">57394</a>  | transmembrane protein 27       | <a href="#">Tmem27</a>        | 0.079 | -9.312            | 2.82863e-05 | 0.00119378  |
| 21125 | 10359582 | <a href="#">NM_018881</a>    | <a href="#">55990</a>  | flavin containing monooxygenas | <a href="#">Fmo2</a>          | 0.078 | -17.279           | 3.92392e-07 | 7.94047e-05 |
| 21126 | 10489444 | <a href="#">NM_138685</a>    | <a href="#">192201</a> | WAP four-disulfide core domain | <a href="#">Wfdc15b</a>       | 0.077 | -41.186           | 7.95238e-10 | 6.19394e-06 |
| 21127 | 10561187 | <a href="#">NM_019394</a>    | <a href="#">12587</a>  | melanoma inhibitory activity 1 | <a href="#">Mia1</a>          | 0.075 | -19.529           | 1.64981e-07 | 4.77857e-05 |
| 21128 | 10598507 | <a href="#">NM_172479</a>    | <a href="#">209837</a> | solute carrier family 38, memb | <a href="#">Slc38a5</a>       | 0.073 | -23.481           | 4.44931e-08 | 2.3519e-05  |
| 21129 | 10511560 | <a href="#">NM_194055</a>    | <a href="#">207920</a> | RNA binding motif protein 35A  | <a href="#">Rbm35a</a>        | 0.072 | -39.093           | 1.15669e-09 | 6.19394e-06 |

|       |          |                              |                        |                                |                               |       |         |             |             |
|-------|----------|------------------------------|------------------------|--------------------------------|-------------------------------|-------|---------|-------------|-------------|
| 21130 | 10464113 | <a href="#">NM_146101</a>    | <a href="#">226243</a> | hyaluronic acid binding protei | <a href="#">Habp2</a>         | 0.066 | -37.828 | 1.4647e-09  | 6.19394e-06 |
| 21131 | 10523717 | <a href="#">NM_009263</a>    | <a href="#">20750</a>  | secreted phosphoprotein 1      | <a href="#">Spp1</a>          | 0.065 | -24.264 | 3.52101e-08 | 2.29448e-05 |
| 21132 | 10497501 | <a href="#">XM_975226</a>    | <a href="#">635702</a> | N-acetylated alpha-linked acid | <a href="#">Naalad12</a>      | 0.065 | -25.159 | 2.71855e-08 | 2.27641e-05 |
| 21133 | 10361023 | <a href="#">NM_008937</a>    | <a href="#">19130</a>  | prospero-related homeobox 1    | <a href="#">Prox1</a>         | 0.062 | -33.85  | 3.25123e-09 | 1.13845e-05 |
| 21134 | 10402390 | <a href="#">NM_009244</a>    | <a href="#">20701</a>  | serine (or cysteine) peptidas  | <a href="#">Serpina1b</a>     | 0.06  | -7.233  | 0.000149324 | 0.00360013  |
| 21135 | 10423024 | <a href="#">NM_029341</a>    | <a href="#">75568</a>  | calcyphosine-like              | <a href="#">Caps1</a>         | 0.059 | -26.553 | 1.84954e-08 | 1.86223e-05 |
| 21136 | 10537014 | <a href="#">NM_001024698</a> | <a href="#">232680</a> | carboxypeptidase A2, pancreati | <a href="#">Cpa2</a>          | 0.057 | -15.366 | 8.96243e-07 | 0.000129796 |
| 21137 | 10403312 | <a href="#">NM_001013785</a> | <a href="#">432720</a> | aldo-keto reductase family 1,  | <a href="#">Akr1c19</a>       | 0.044 | -19.167 | 1.88384e-07 | 5.27358e-05 |
| 21138 | 10471912 | <a href="#">NM_027552</a>    | <a href="#">70789</a>  | kynureninase (L-kynurenine hyd | <a href="#">Kynu</a>          | 0.043 | -19.1   | 1.93138e-07 | 5.30351e-05 |
| 21139 | 10392685 | <a href="#">BC038904</a>     | <a href="#">217294</a> | cDNA sequence BC006965         | <a href="#">BC006965</a>      | 0.041 | -32.32  | 4.52994e-09 | 1.14953e-05 |
| 21140 | 10419392 | <a href="#">BC026534</a>     | <a href="#">67082</a>  | RIKEN cDNA 1700011H14 gene     | <a href="#">1700011H14Rik</a> | 0.04  | -20.409 | 1.20663e-07 | 4.04969e-05 |
| 21141 | 10402368 | <a href="#">NM_007618</a>    | <a href="#">12401</a>  | serine (or cysteine) peptidase | <a href="#">Serpina6</a>      | 0.038 | -7.032  | 0.000178821 | 0.00410086  |
| 21142 | 10513630 | <a href="#">NM_007443</a>    | <a href="#">11699</a>  | alpha 1 microglobulin/bikunin  | <a href="#">Ambp</a>          | 0.032 | -20.414 | 1.20456e-07 | 4.04969e-05 |
| 21143 | 10531149 | <a href="#">NM_008096</a>    | <a href="#">14473</a>  | group specific component       | <a href="#">Gc</a>            | 0.028 | -39.958 | 9.88268e-10 | 6.19394e-06 |
| 21144 | 10402406 | <a href="#">NM_009245</a>    | <a href="#">20702</a>  | serine (or cysteine) peptidase | <a href="#">Serpina1c</a>     | 0.015 | -13.226 | 2.55786e-06 | 0.000244721 |
